# Supplementary material for: Octanol-water partition coefficient measurements for the SAMPL6 Blind Prediction Challenge
Source: bioRxiv or medRxiv preprint supplement (doi:10.1101/757393), 2019-12-02
Supplement: Supplementary file [file media-2.zip]

Sample name: **M07\_octanol**  
 Assay name: **pH-metric high logP**  
 Assay ID: **18B-28012**  
 Filename: **C:\Sirius\_T3\Mehtap\20180228\_exp28\_logP\_T3-2\18B-28012\_M07\_octanol\_pH-metric high logP.t3r**

Experiment start time: **2/28/2018 5:44:56 PM**  
 Analyst: **Pion**  
 Instrument ID: **T312060**

## pH-metric Result

logP (XH +) -5.97 ±0.89 (n=49)  
 logP (neutral X) 3.14 ±0.01 (n=49)

### 18B-28012 Points 1 to 30

M07\_octanol concentration factor 0.885  
 Carbonate 0.0000 mM  
 Acidity error 0.24941 mM

### 18B-28012 Points 31 to 62

M07\_octanol concentration factor 0.786  
 Carbonate 0.0623 mM  
 Acidity error 0.05292 mM

### 18B-28012 Points 63 to 95

M07\_octanol concentration factor 0.842  
 Carbonate 0.0998 mM  
 Acidity error 0.05919 mM

## Warnings and errors

Errors None  
 Warnings One or more logP values out of range

## Sample logD and percent species

| pH     | M07_octanol<br>logD | M07_octanol<br>M07_octanolH | M07_octanol<br>M07_octanol | M07_octanol<br>M07_octanolH* | M07_octanol<br>M07_octanol* | Comment    |
|--------|---------------------|-----------------------------|----------------------------|------------------------------|-----------------------------|------------|
| 1.000  | -1.93               | 98.83 %                     | 0.00 %                     | 0.00 %                       | 1.16 %                      | Stomach pH |
| 1.200  | -1.73               | 98.17 %                     | 0.00 %                     | 0.00 %                       | 1.83 %                      |            |
| 2.000  | -0.93               | 89.45 %                     | 0.01 %                     | 0.00 %                       | 10.54 %                     |            |
| 3.000  | 0.07                | 45.89 %                     | 0.04 %                     | 0.00 %                       | 54.07 %                     |            |
| 4.000  | 1.07                | 7.82 %                      | 0.07 %                     | 0.00 %                       | 92.12 %                     |            |
| 5.000  | 2.04                | 0.84 %                      | 0.07 %                     | 0.00 %                       | 99.09 %                     | Blood pH   |
| 6.000  | 2.80                | 0.08 %                      | 0.07 %                     | 0.00 %                       | 99.84 %                     |            |
| 6.500  | 3.00                | 0.03 %                      | 0.07 %                     | 0.00 %                       | 99.90 %                     |            |
| 7.000  | 3.09                | 0.01 %                      | 0.07 %                     | 0.00 %                       | 99.92 %                     |            |
| 7.400  | 3.12                | 0.00 %                      | 0.07 %                     | 0.00 %                       | 99.92 %                     |            |
| 8.000  | 3.14                | 0.00 %                      | 0.07 %                     | 0.00 %                       | 99.93 %                     |            |
| 9.000  | 3.14                | 0.00 %                      | 0.07 %                     | 0.00 %                       | 99.93 %                     |            |
| 10.000 | 3.14                | 0.00 %                      | 0.07 %                     | 0.00 %                       | 99.93 %                     |            |
| 11.000 | 3.14                | 0.00 %                      | 0.07 %                     | 0.00 %                       | 99.93 %                     |            |
| 12.000 | 3.14                | 0.00 %                      | 0.07 %                     | 0.00 %                       | 99.93 %                     |            |

Sample name: **M07\_octanol**  
 Assay name: **pH-metric high logP**  
 Assay ID: **18B-28012**  
 Filename: **C:\Sirius\_T3\Mehtap\20180228\_exp28\_logP\_T3-2\18B-28012\_M07\_octanol\_pH-metric high logP.t3r**

Experiment start time: **2/28/2018 5:44:56 PM**  
 Analyst: **Pion**  
 Instrument ID: **T312060**

## Graphs

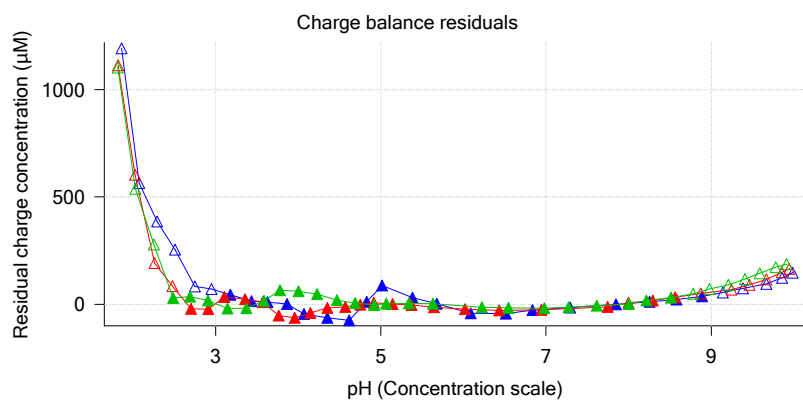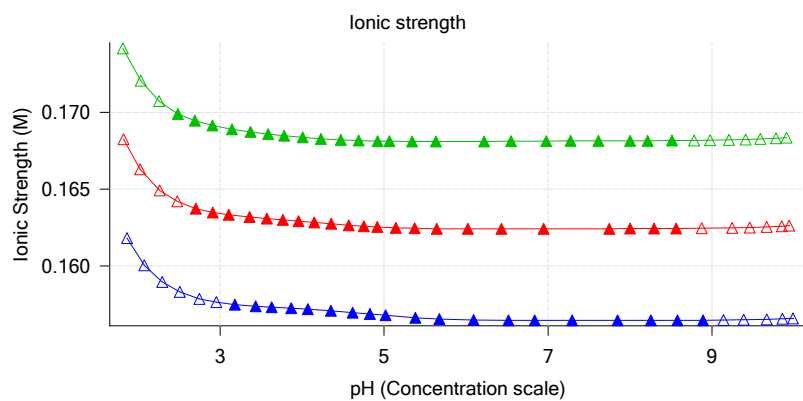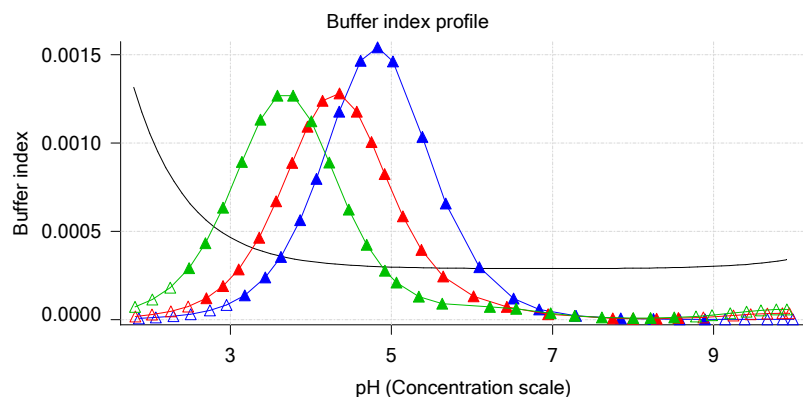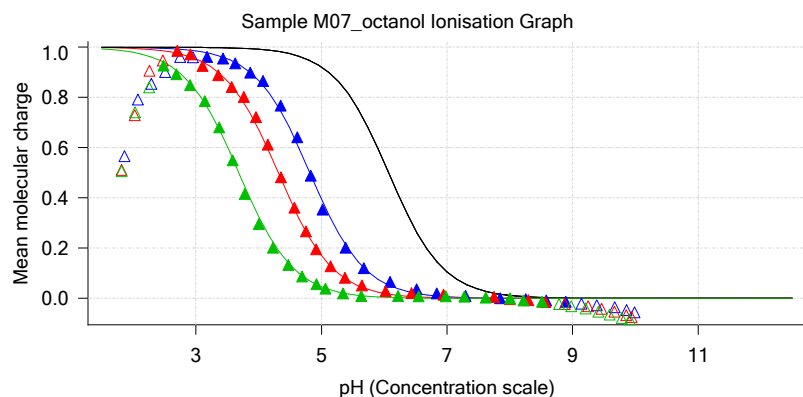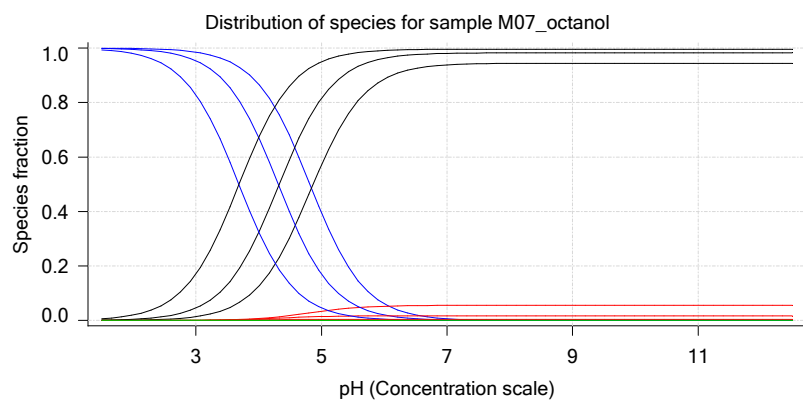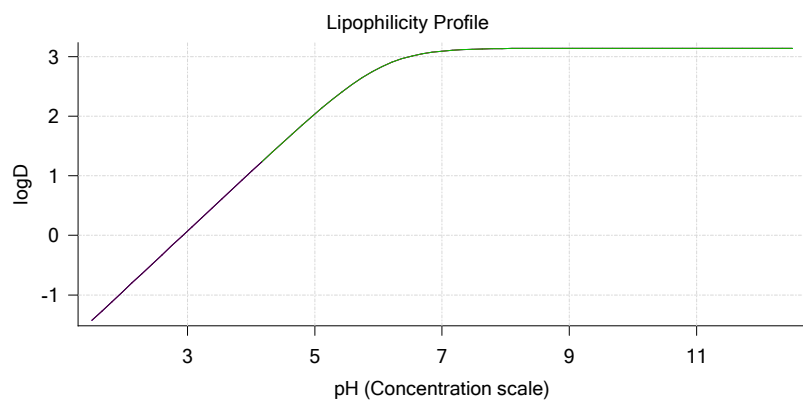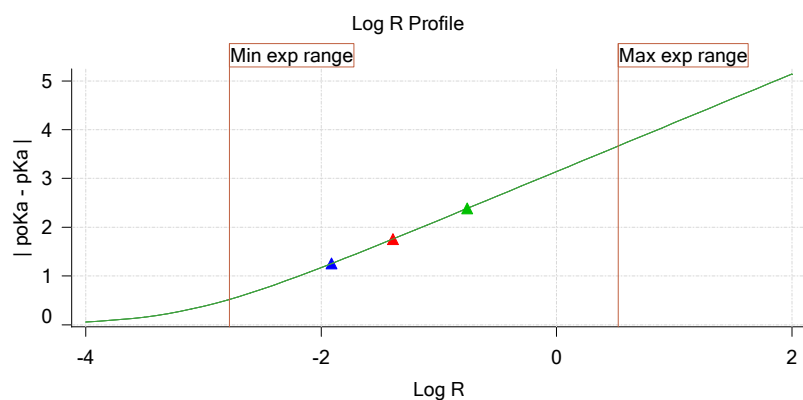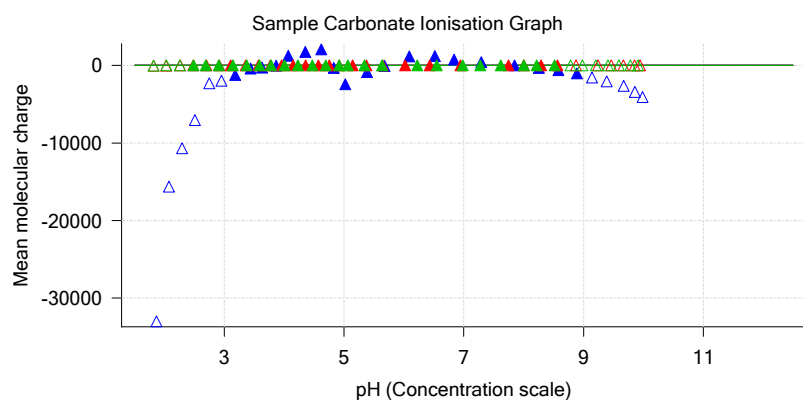

Sample name: **M07\_octanol**  
 Assay name: **pH-metric high logP**  
 Assay ID: **18B-28012**  
 Filename: **C:\Sirius\_T3\Mehtap\20180228\_exp28\_logP\_T3-2\18B-28012\_M07\_octanol\_pH-metric high logP.t3r**

Experiment start time: **2/28/2018 5:44:56 PM**  
 Analyst: **Pion**  
 Instrument ID: **T312060**

## Graphs (continued)

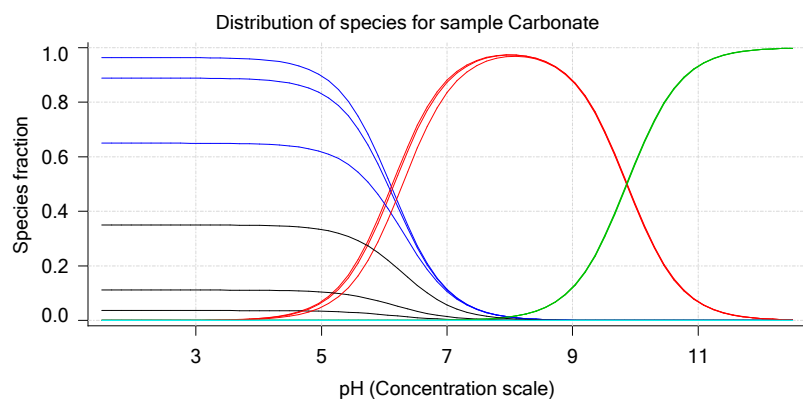

Sample name: **M07\_octanol**  
 Assay name: **pH-metric high logP**  
 Assay ID: **18B-28012**  
 Filename: **C:\Sirius\_T3\Mehtap\20180228\_exp28\_logP\_T3-2\18B-28012\_M07\_octanol\_pH-metric high logP.t3r**

Experiment start time: **2/28/2018 5:44:56 PM**  
 Analyst: **Pion**  
 Instrument ID: **T312060**

## pH-metric high logP Titration 1 of 3 18B-28012 Points 1 to 30

### Overall results

RMSD 0.538  
 Average ionic strength 0.157 M  
 Average temperature 25.0°C  
 Partition ratio 0.0122 : 1  
 Analyte concentration range 2983.5 µM to 3075.2 µM  
 Total points considered 19 of 30

### Warnings and errors

Errors None  
 Warnings None

### Four-Plus parameters

Alpha 0.130 2/28/2018 5:44:56 PM C:\Sirius\_T3\HCl18B27.t3r  
 S 0.9970 2/28/2018 5:44:56 PM C:\Sirius\_T3\HCl18B27.t3r  
 jH 0.8 2/28/2018 5:44:56 PM C:\Sirius\_T3\HCl18B27.t3r  
 jOH -0.4 2/28/2018 5:44:56 PM C:\Sirius\_T3\HCl18B27.t3r

### Titrants

0.50 M HCl 0.993513 2/28/2018 5:44:56 PM C:\Sirius\_T3\HCl18B27.t3r  
 0.50 M KOH 0.999845 2/28/2018 5:44:56 PM C:\Sirius\_T3\KOH18B27.t3r

### Sample

M07\_octanol concentration factor 0.885  
 Base pKa 1 6.07  
 logP (XH +) 0.46  
 logP (neutral X) 3.15

### Sample graphs

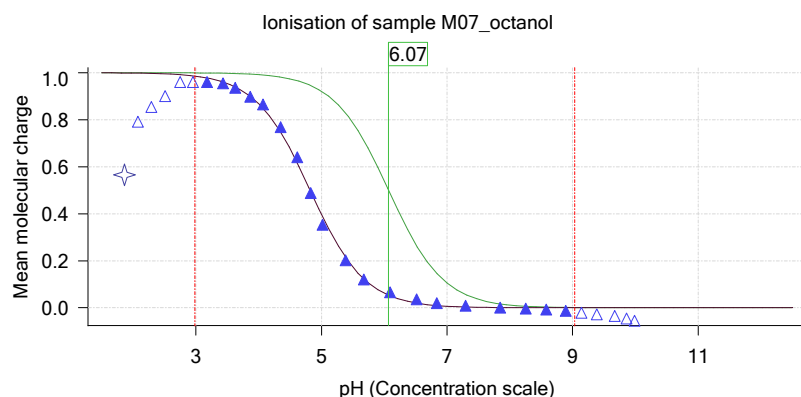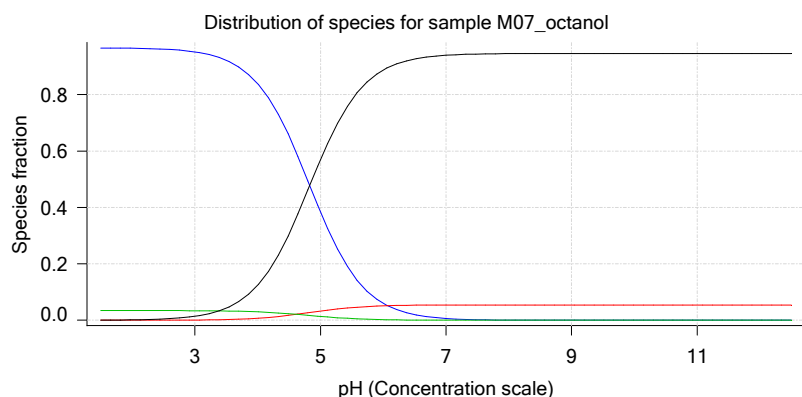

Sample name: **M07\_octanol**  
Assay name: **pH-metric high logP**  
Assay ID: **18B-28012**  
Filename: **C:\Sirius\_T3\Mehtap\20180228\_exp28\_logP\_T3-2\18B-28012\_M07\_octanol\_pH-metric high logP.t3r**

Experiment start time: **2/28/2018 5:44:56 PM**  
Analyst: **Pion**  
Instrument ID: **T312060**

## Sample graphs (continued)

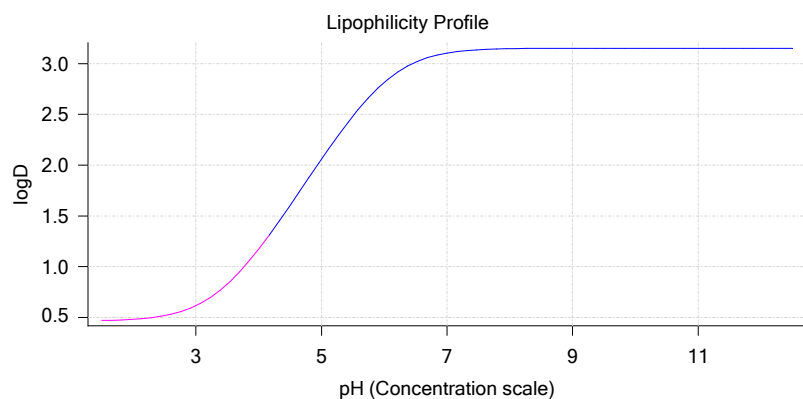

## Sample logD and percent species

| pH     | M07_octanol<br>logD | M07_octanol<br>M07_octanolH | M07_octanol<br>M07_octanolH | M07_octanol<br>M07_octanolH* | M07_octanol<br>M07_octanol* | Comment    |
|--------|---------------------|-----------------------------|-----------------------------|------------------------------|-----------------------------|------------|
| 1.000  | 0.46                | 96.55 %                     | 0.00 %                      | 3.43 %                       | 0.01 %                      | Stomach pH |
| 1.200  | 0.47                | 96.55 %                     | 0.00 %                      | 3.43 %                       | 0.02 %                      |            |
| 2.000  | 0.48                | 96.42 %                     | 0.01 %                      | 3.43 %                       | 0.14 %                      |            |
| 3.000  | 0.61                | 95.13 %                     | 0.08 %                      | 3.38 %                       | 1.41 %                      |            |
| 4.000  | 1.17                | 83.88 %                     | 0.71 %                      | 2.98 %                       | 12.42 %                     |            |
| 5.000  | 2.06                | 38.44 %                     | 3.27 %                      | 1.37 %                       | 56.92 %                     | Blood pH   |
| 6.000  | 2.82                | 5.99 %                      | 5.10 %                      | 0.21 %                       | 88.70 %                     |            |
| 6.500  | 3.02                | 1.98 %                      | 5.32 %                      | 0.07 %                       | 92.63 %                     |            |
| 7.000  | 3.10                | 0.63 %                      | 5.40 %                      | 0.02 %                       | 93.94 %                     |            |
| 7.400  | 3.13                | 0.25 %                      | 5.42 %                      | 0.01 %                       | 94.32 %                     |            |
| 8.000  | 3.15                | 0.06 %                      | 5.43 %                      | 0.00 %                       | 94.50 %                     |            |
| 9.000  | 3.15                | 0.01 %                      | 5.43 %                      | 0.00 %                       | 94.56 %                     |            |
| 10.000 | 3.15                | 0.00 %                      | 5.44 %                      | 0.00 %                       | 94.56 %                     |            |
| 11.000 | 3.15                | 0.00 %                      | 5.44 %                      | 0.00 %                       | 94.56 %                     |            |
| 12.000 | 3.15                | 0.00 %                      | 5.44 %                      | 0.00 %                       | 94.56 %                     |            |

## Carbonate and acidity

Carbonate 0.000 mM  
Acidity error 0.249 mM

## Other graphs

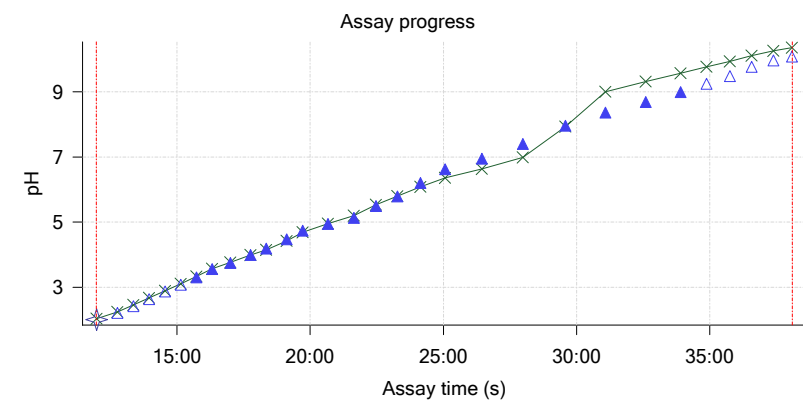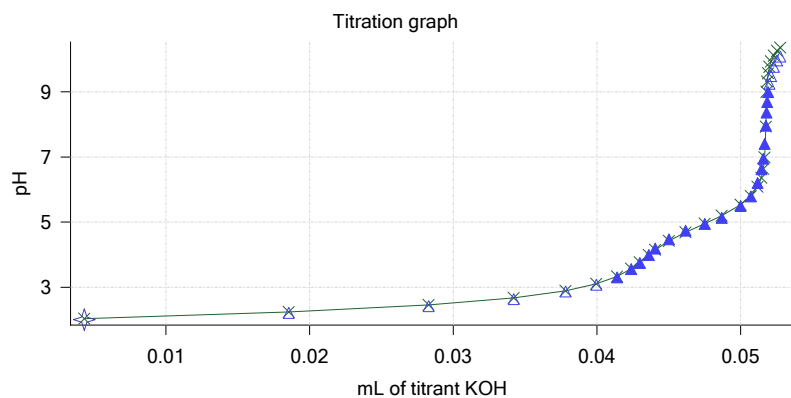

Sample name: **M07\_octanol**  
 Assay name: **pH-metric high logP**  
 Assay ID: **18B-28012**  
 Filename: **C:\Sirius\_T3\Mehtap\20180228\_exp28\_logP\_T3-2\18B-28012\_M07\_octanol\_pH-metric high logP.t3r**

Experiment start time: **2/28/2018 5:44:56 PM**  
 Analyst: **Pion**  
 Instrument ID: **T312060**

## Other graphs (continued)

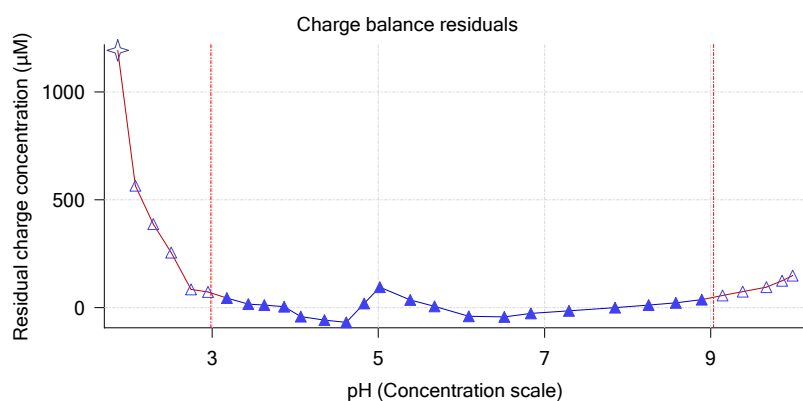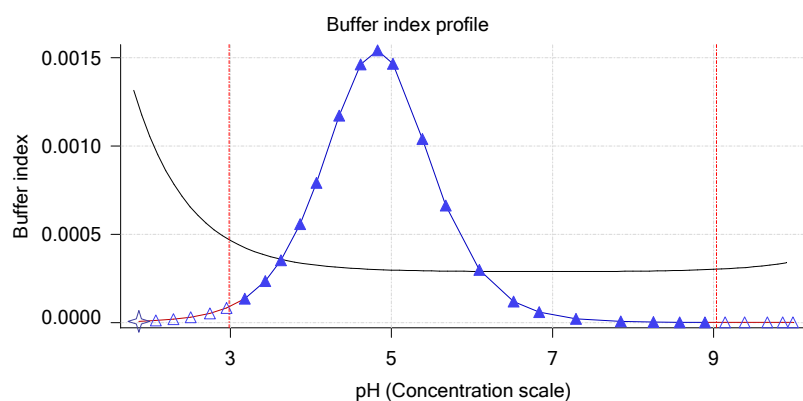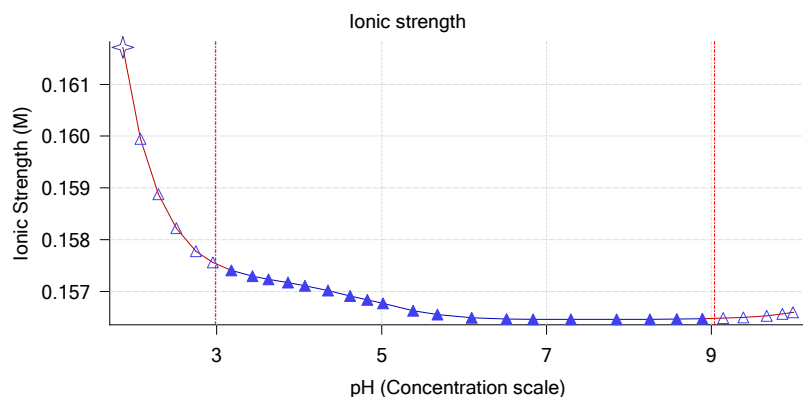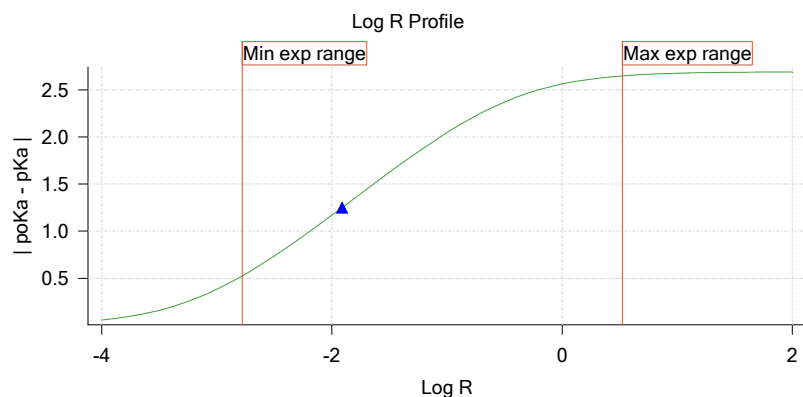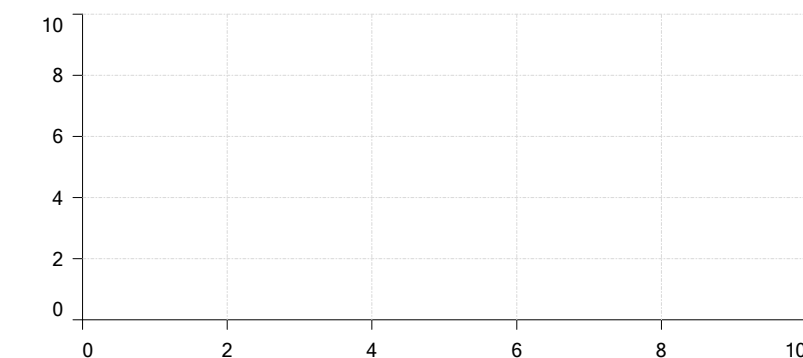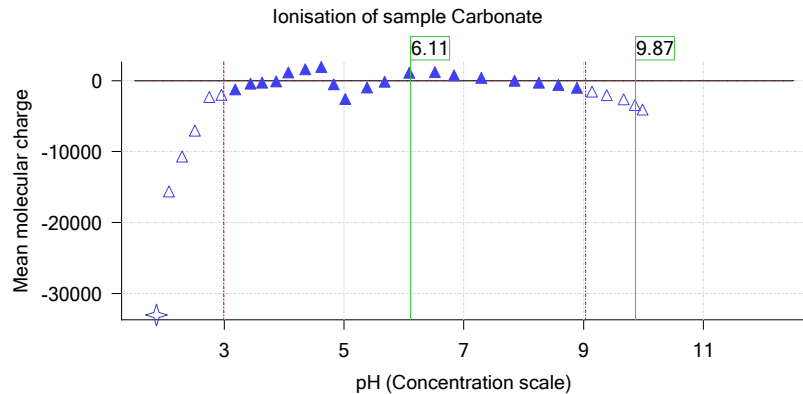

Sample name: **M07\_octanol**  
 Assay name: **pH-metric high logP**  
 Assay ID: **18B-28012**  
 Filename: **C:\Sirius\_T3\Mehtap\20180228\_exp28\_logP\_T3-2\18B-28012\_M07\_octanol\_pH-metric high logP.t3r**

Experiment start time: **2/28/2018 5:44:56 PM**  
 Analyst: **Pion**  
 Instrument ID: **T312060**

pH-metric high logP Titration 2 of 3 18B-28012 Points 31 to 62

## Overall results

RMSD 0.578  
 Average ionic strength 0.163 M  
 Average temperature 25.0°C  
 Partition ratio 0.0406 : 1  
 Analyte concentration range 2713.2 µM to 2800.4 µM  
 Total points considered 22 of 32

## Warnings and errors

Errors None  
 Warnings None

## Four-Plus parameters

Alpha 0.130 2/28/2018 5:44:56 PM C:\Sirius\_T3\HCl18B27.t3r  
 S 0.9970 2/28/2018 5:44:56 PM C:\Sirius\_T3\HCl18B27.t3r  
 jH 0.8 2/28/2018 5:44:56 PM C:\Sirius\_T3\HCl18B27.t3r  
 jOH -0.4 2/28/2018 5:44:56 PM C:\Sirius\_T3\HCl18B27.t3r

## Titrants

0.50 M HCl 0.993513 2/28/2018 5:44:56 PM C:\Sirius\_T3\HCl18B27.t3r  
 0.50 M KOH 0.999845 2/28/2018 5:44:56 PM C:\Sirius\_T3\KOH18B27.t3r

## Sample

M07\_octanol concentration factor 0.786  
 Base pKa 1 6.07  
 logP (XH +) 0.52  
 logP (neutral X) 3.18

## Sample graphs

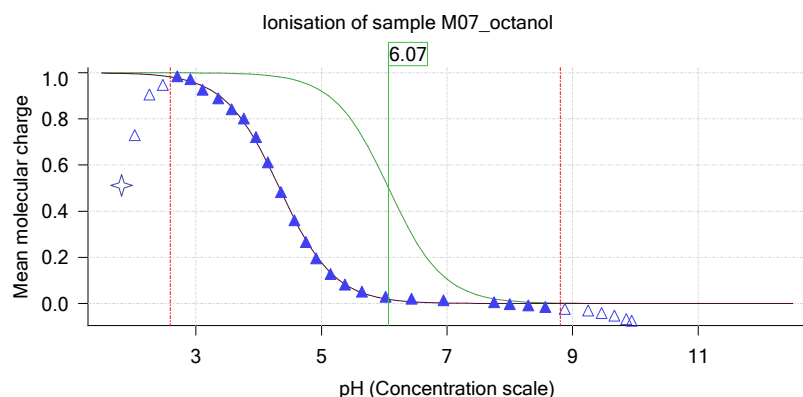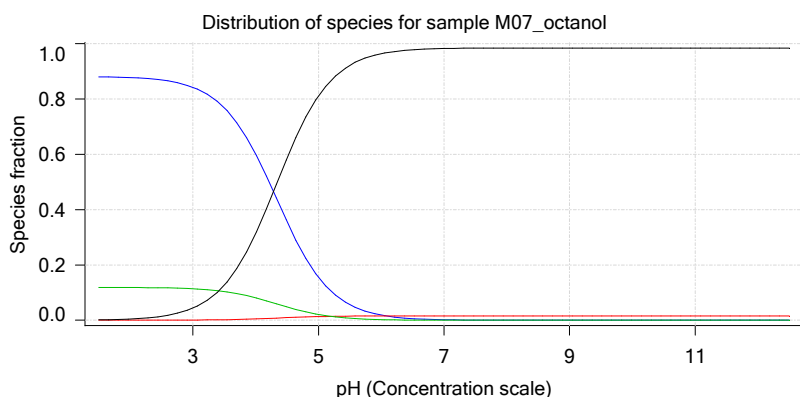

Sample name: **M07\_octanol**  
 Assay name: **pH-metric high logP**  
 Assay ID: **18B-28012**  
 Filename: **C:\Sirius\_T3\Mehtap\20180228\_exp28\_logP\_T3-2\18B-28012\_M07\_octanol\_pH-metric high logP.t3r**

Experiment start time: **2/28/2018 5:44:56 PM**  
 Analyst: **Pion**  
 Instrument ID: **T312060**

## Sample graphs (continued)

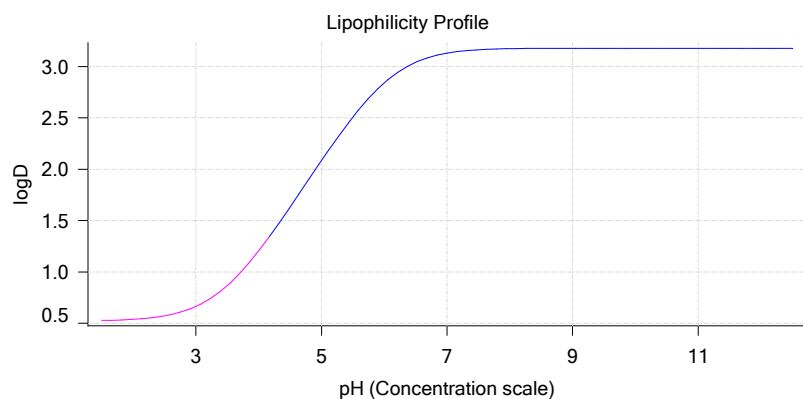

## Sample logD and percent species

| pH     | M07_octanol<br>logD | M07_octanol<br>M07_octanolH | M07_octanol<br>M07_octanolH | M07_octanol<br>M07_octanolH* | M07_octanol<br>M07_octanol* | Comment    |
|--------|---------------------|-----------------------------|-----------------------------|------------------------------|-----------------------------|------------|
| 1.000  | 0.52                | 88.06 %                     | 0.00 %                      | 11.89 %                      | 0.05 %                      |            |
| 1.200  | 0.52                | 88.04 %                     | 0.00 %                      | 11.89 %                      | 0.07 %                      | Stomach pH |
| 2.000  | 0.54                | 87.69 %                     | 0.01 %                      | 11.84 %                      | 0.46 %                      |            |
| 3.000  | 0.66                | 84.18 %                     | 0.07 %                      | 11.37 %                      | 4.38 %                      |            |
| 4.000  | 1.20                | 60.09 %                     | 0.51 %                      | 8.11 %                       | 31.29 %                     |            |
| 5.000  | 2.08                | 15.56 %                     | 1.32 %                      | 2.10 %                       | 81.02 %                     |            |
| 6.000  | 2.84                | 1.85 %                      | 1.57 %                      | 0.25 %                       | 96.33 %                     |            |
| 6.500  | 3.04                | 0.59 %                      | 1.60 %                      | 0.08 %                       | 97.73 %                     |            |
| 7.000  | 3.13                | 0.19 %                      | 1.60 %                      | 0.03 %                       | 98.18 %                     |            |
| 7.400  | 3.16                | 0.08 %                      | 1.61 %                      | 0.01 %                       | 98.31 %                     | Blood pH   |
| 8.000  | 3.17                | 0.02 %                      | 1.61 %                      | 0.00 %                       | 98.37 %                     |            |
| 9.000  | 3.18                | 0.00 %                      | 1.61 %                      | 0.00 %                       | 98.39 %                     |            |
| 10.000 | 3.18                | 0.00 %                      | 1.61 %                      | 0.00 %                       | 98.39 %                     |            |
| 11.000 | 3.18                | 0.00 %                      | 1.61 %                      | 0.00 %                       | 98.39 %                     |            |
| 12.000 | 3.18                | 0.00 %                      | 1.61 %                      | 0.00 %                       | 98.39 %                     |            |

## Carbonate and acidity

Carbonate 0.062 mM  
 Acidity error 0.053 mM

## Other graphs

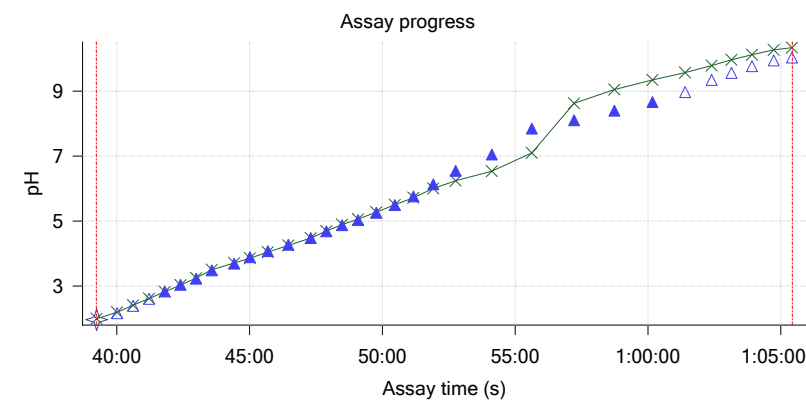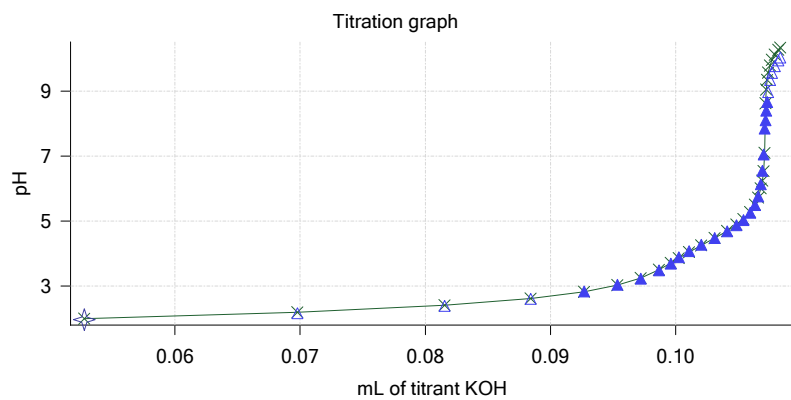



Sample name: **M07\_octanol**  
 Assay name: **pH-metric high logP**  
 Assay ID: **18B-28012**  
 Filename: **C:\Sirius\_T3\Mehtap\20180228\_exp28\_logP\_T3-2\18B-28012\_M07\_octanol\_pH-metric high logP.t3r**

Experiment start time: **2/28/2018 5:44:56 PM**  
 Analyst: **Pion**  
 Instrument ID: **T312060**

## Other graphs (continued)

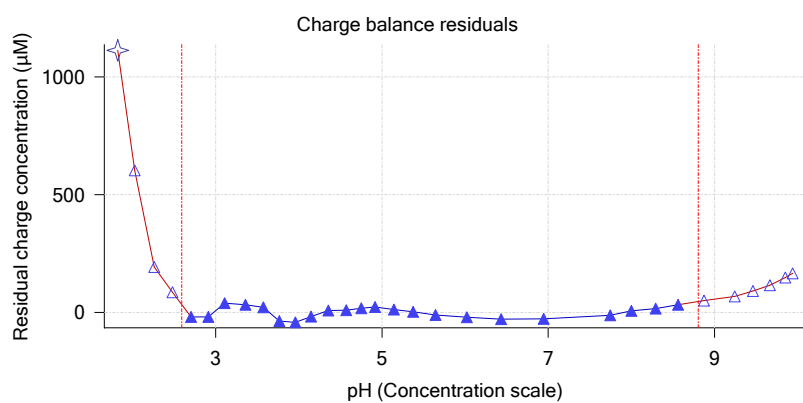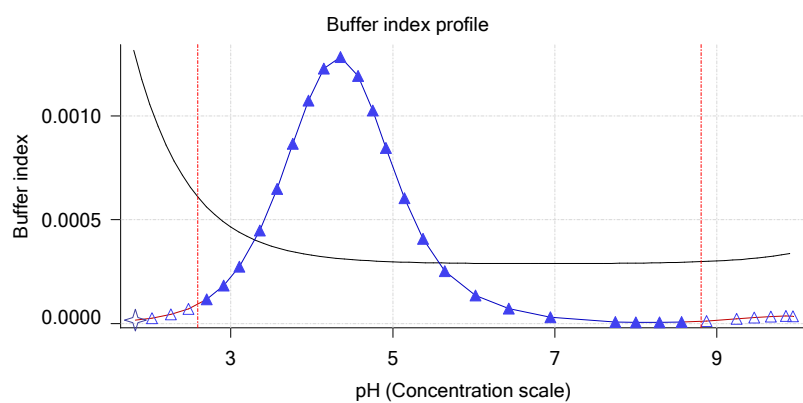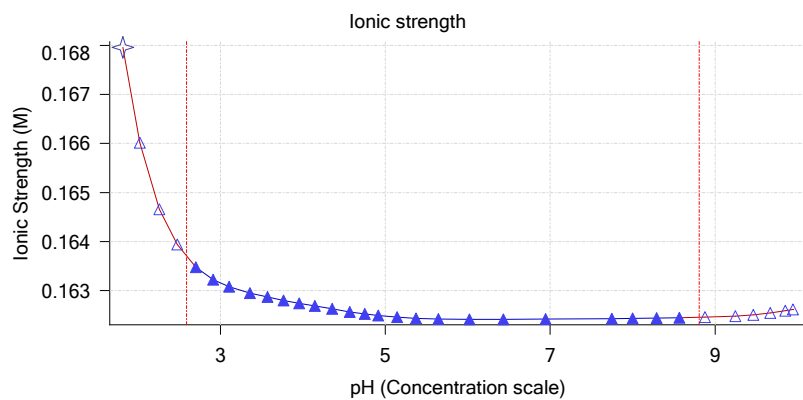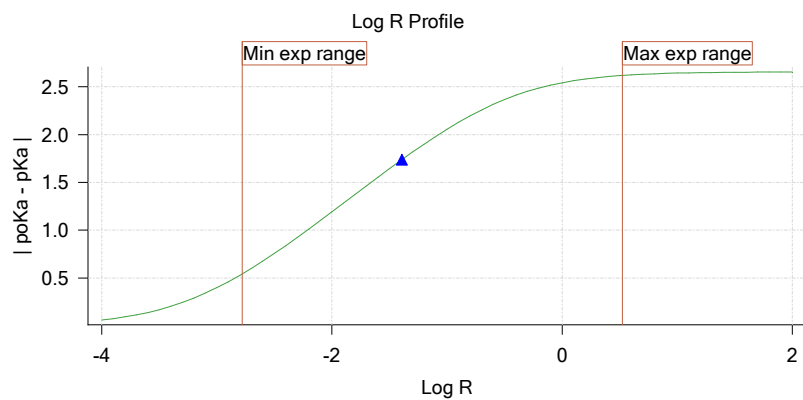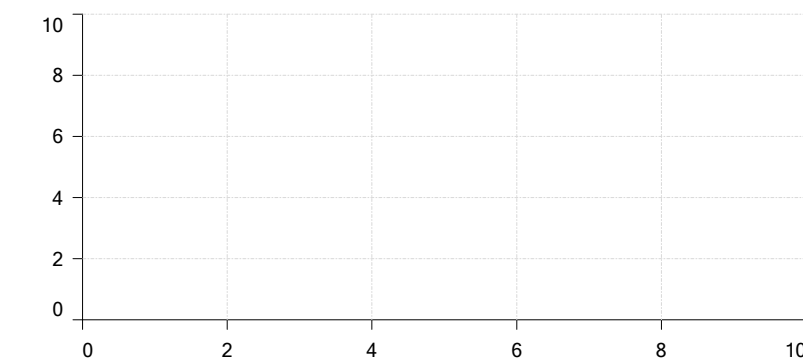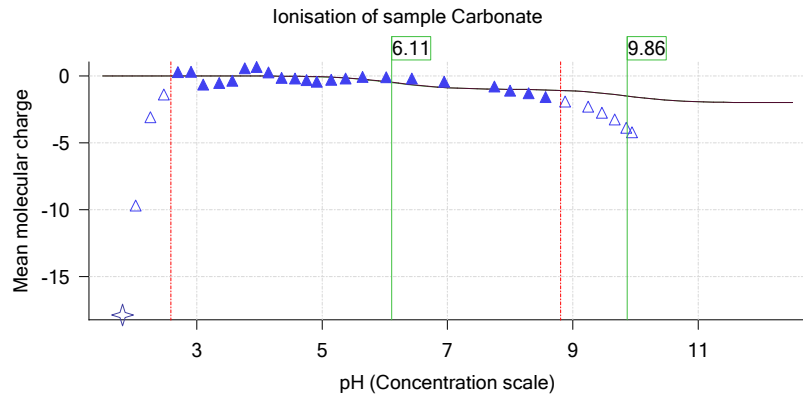

Sample name: **M07\_octanol**  
 Assay name: **pH-metric high logP**  
 Assay ID: **18B-28012**  
 Filename: **C:\Sirius\_T3\Mehtap\20180228\_exp28\_logP\_T3-2\18B-28012\_M07\_octanol\_pH-metric high logP.t3r**

Experiment start time: **2/28/2018 5:44:56 PM**  
 Analyst: **Pion**  
 Instrument ID: **T312060**

pH-metric high logP Titration 3 of 3 18B-28012 Points 63 to 95

## Overall results

RMSD 0.432  
 Average ionic strength 0.168 M  
 Average temperature 25.0°C  
 Partition ratio 0.1744 : 1  
 Analyte concentration range 2246.9 µM to 2311.5 µM  
 Total points considered 23 of 33

## Warnings and errors

Errors None  
 Warnings None

## Four-Plus parameters

Alpha 0.130 2/28/2018 5:44:56 PM C:\Sirius\_T3\HCl18B27.t3r  
 S 0.9970 2/28/2018 5:44:56 PM C:\Sirius\_T3\HCl18B27.t3r  
 jH 0.8 2/28/2018 5:44:56 PM C:\Sirius\_T3\HCl18B27.t3r  
 jOH -0.4 2/28/2018 5:44:56 PM C:\Sirius\_T3\HCl18B27.t3r

## Titrants

0.50 M HCl 0.993513 2/28/2018 5:44:56 PM C:\Sirius\_T3\HCl18B27.t3r  
 0.50 M KOH 0.999845 2/28/2018 5:44:56 PM C:\Sirius\_T3\KOH18B27.t3r

## Sample

M07\_octanol concentration factor 0.842  
 Base pKa 1 6.07  
 logP (XH +) 0.57  
 logP (neutral X) 3.38

## Sample graphs

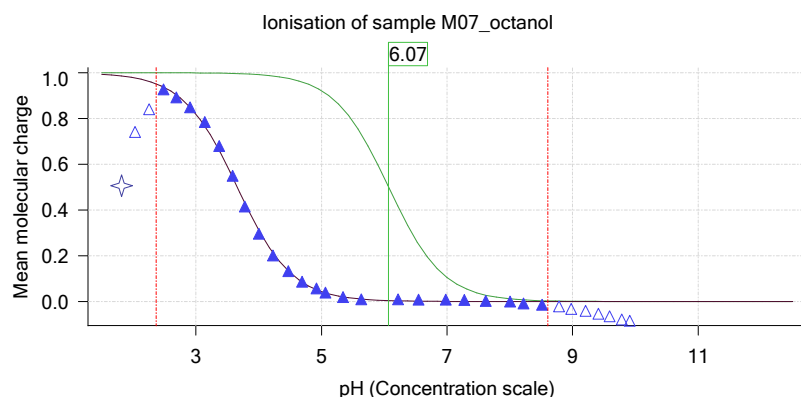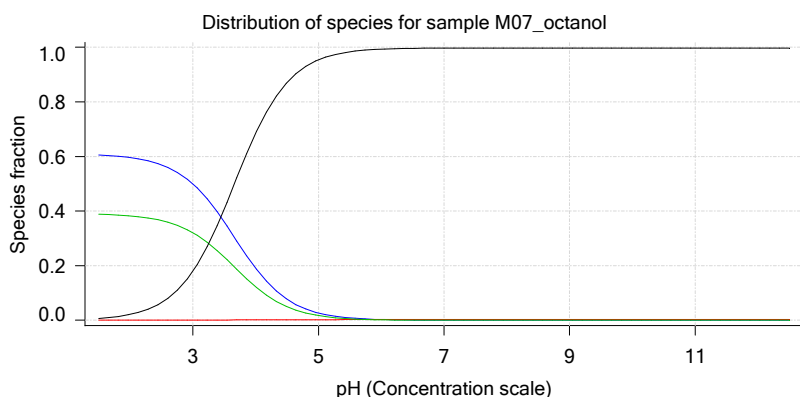

Sample name: **M07\_octanol**  
 Assay name: **pH-metric high logP**  
 Assay ID: **18B-28012**  
 Filename: **C:\Sirius\_T3\Mehtap\20180228\_exp28\_logP\_T3-2\18B-28012\_M07\_octanol\_pH-metric high logP.t3r**

Experiment start time: **2/28/2018 5:44:56 PM**  
 Analyst: **Pion**  
 Instrument ID: **T312060**

## Sample graphs (continued)

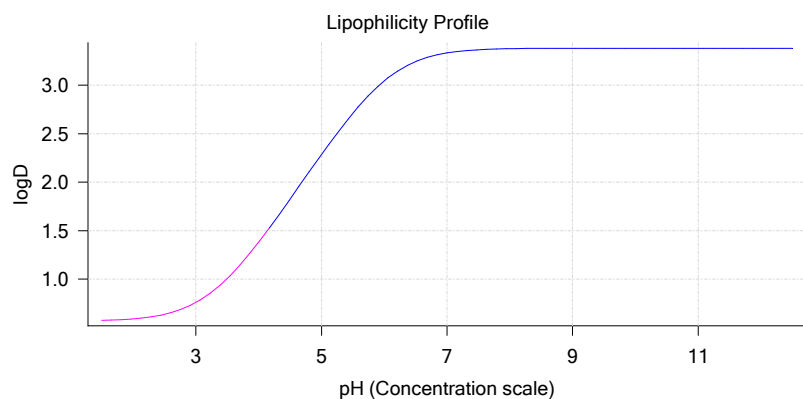

## Sample logD and percent species

| pH     | M07_octanol<br>logD | M07_octanol<br>M07_octanolH | M07_octanol<br>M07_octanolH | M07_octanol<br>M07_octanolH* | M07_octanol<br>M07_octanol* | Comment    |
|--------|---------------------|-----------------------------|-----------------------------|------------------------------|-----------------------------|------------|
| 1.000  | 0.57                | 60.78 %                     | 0.00 %                      | 39.00 %                      | 0.22 %                      |            |
| 1.200  | 0.57                | 60.70 %                     | 0.00 %                      | 38.95 %                      | 0.34 %                      | Stomach pH |
| 2.000  | 0.59                | 59.61 %                     | 0.01 %                      | 38.25 %                      | 2.14 %                      |            |
| 3.000  | 0.76                | 49.98 %                     | 0.04 %                      | 32.07 %                      | 17.91 %                     |            |
| 4.000  | 1.38                | 19.11 %                     | 0.16 %                      | 12.26 %                      | 68.47 %                     |            |
| 5.000  | 2.28                | 2.66 %                      | 0.23 %                      | 1.71 %                       | 95.40 %                     |            |
| 6.000  | 3.05                | 0.28 %                      | 0.24 %                      | 0.18 %                       | 99.31 %                     |            |
| 6.500  | 3.25                | 0.09 %                      | 0.24 %                      | 0.06 %                       | 99.62 %                     |            |
| 7.000  | 3.33                | 0.03 %                      | 0.24 %                      | 0.02 %                       | 99.72 %                     |            |
| 7.400  | 3.36                | 0.01 %                      | 0.24 %                      | 0.01 %                       | 99.74 %                     | Blood pH   |
| 8.000  | 3.38                | 0.00 %                      | 0.24 %                      | 0.00 %                       | 99.76 %                     |            |
| 9.000  | 3.38                | 0.00 %                      | 0.24 %                      | 0.00 %                       | 99.76 %                     |            |
| 10.000 | 3.38                | 0.00 %                      | 0.24 %                      | 0.00 %                       | 99.76 %                     |            |
| 11.000 | 3.38                | 0.00 %                      | 0.24 %                      | 0.00 %                       | 99.76 %                     |            |
| 12.000 | 3.38                | 0.00 %                      | 0.24 %                      | 0.00 %                       | 99.76 %                     |            |

## Carbonate and acidity

 Carbonate 0.100 mM  
 Acidity error 0.059 mM

## Other graphs

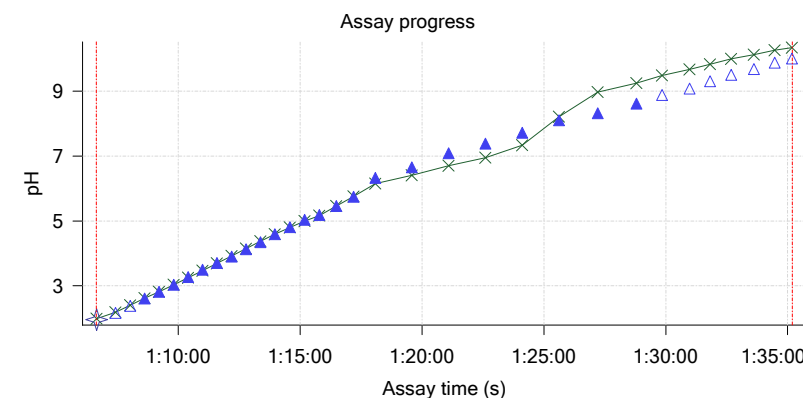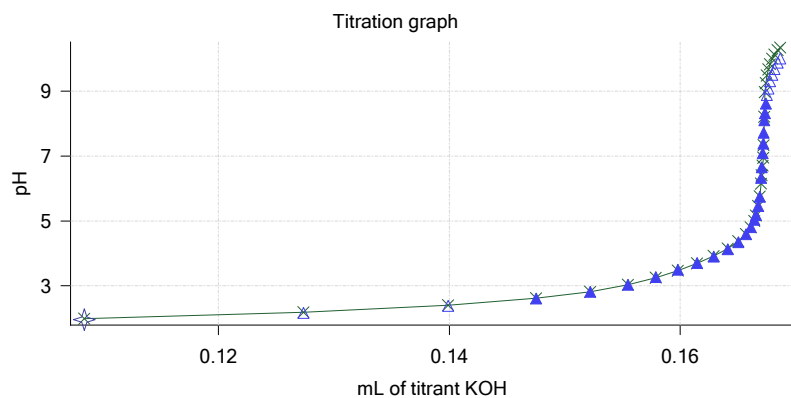

Sample name: **M07\_octanol**  
 Assay name: **pH-metric high logP**  
 Assay ID: **18B-28012**  
 Filename: **C:\Sirius\_T3\Mehtap\20180228\_exp28\_logP\_T3-2\18B-28012\_M07\_octanol\_pH-metric high logP.t3r**

Experiment start time: **2/28/2018 5:44:56 PM**  
 Analyst: **Pion**  
 Instrument ID: **T312060**

## Other graphs (continued)

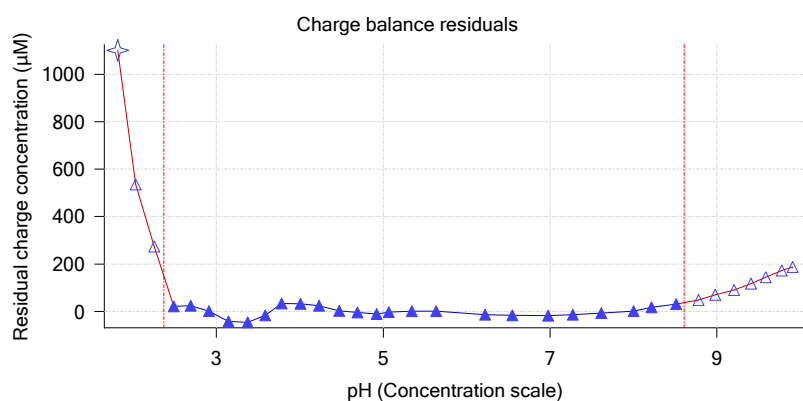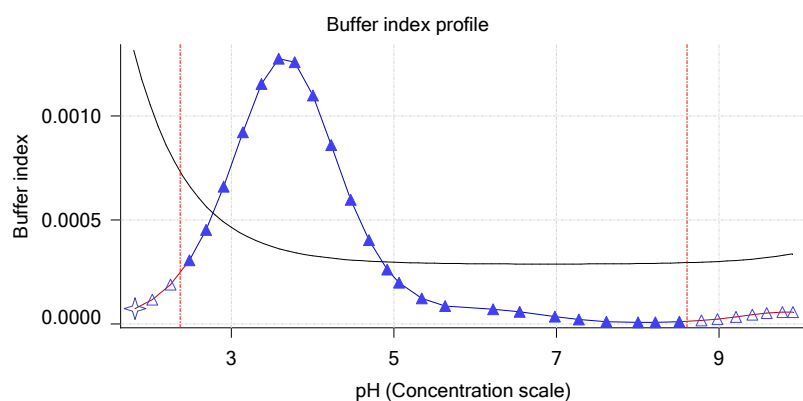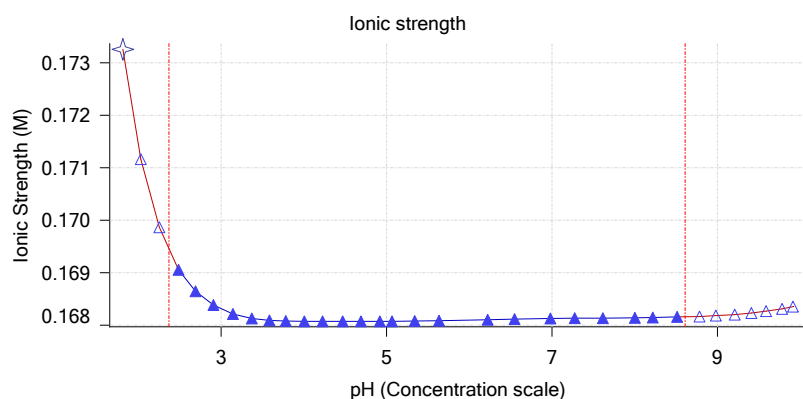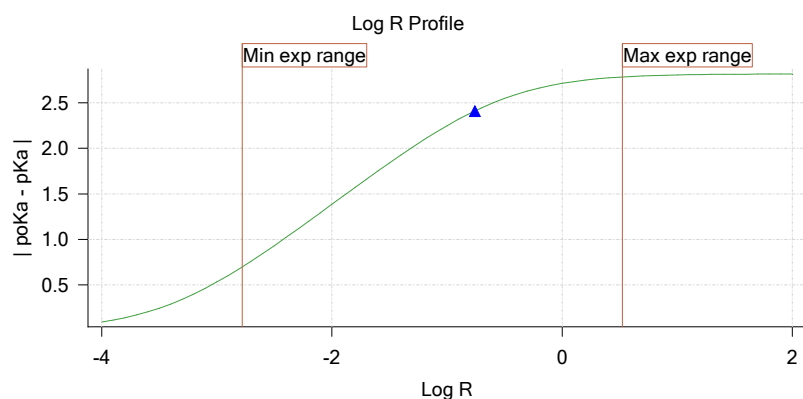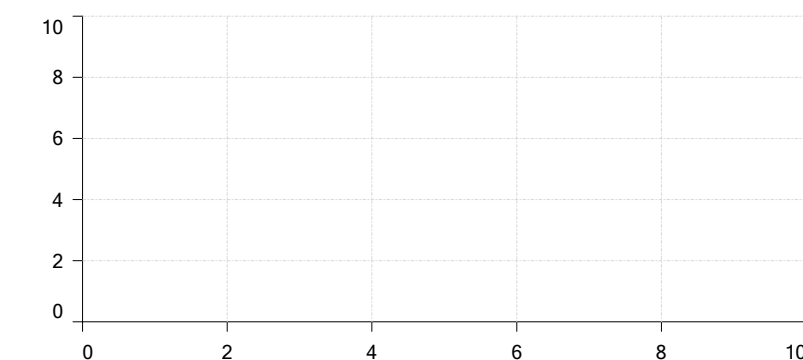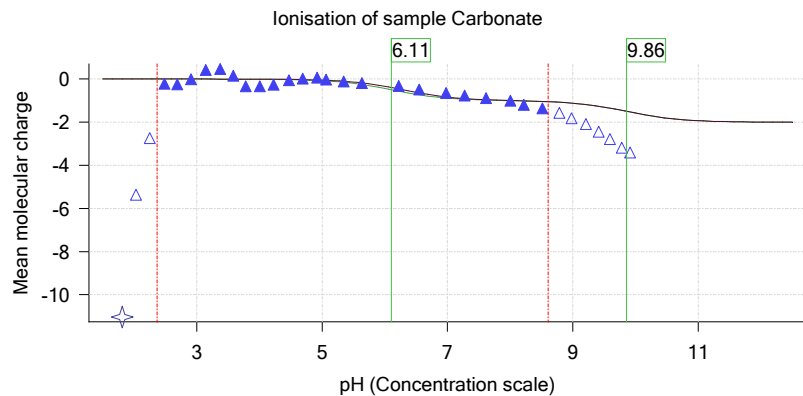

Sample name: **M07\_octanol**  
 Assay name: **pH-metric high logP**  
 Assay ID: **18B-28012**  
 Filename: **C:\Sirius\_T3\Mehtap\20180228\_exp28\_logP\_T3-2\18B-28012\_M07\_octanol\_pH-metric high logP.t3r**

Experiment start time: **2/28/2018 5:44:56 PM**  
 Analyst: **Pion**  
 Instrument ID: **T312060**

## Assay Model

| Settings                          | Value        | Date/Time changed    | Imported from      |
|-----------------------------------|--------------|----------------------|--------------------|
| Sample name                       | M07_octanol  | 2/27/2018 4:29:24 PM | User entered value |
| Sample by                         | Weight       |                      | Default value      |
| Sample weight                     | 0.001140 g   | 2/28/2018 4:24:13 PM | User entered value |
| Formula weight                    | 235.28 g/mol | 2/27/2018 4:29:24 PM | User entered value |
| Solubility                        | Unknown      |                      | Default value      |
| Molecular weight                  | 235.28       | 2/27/2018 4:29:24 PM | User entered value |
| Individual pKa ionic environments | No           |                      | Default value      |
| Number of pKas                    | 1            | 2/27/2018 4:29:24 PM | User entered value |
| Sample is a                       | Base         | 2/27/2018 4:29:24 PM | User entered value |
| pKa 1                             | 6.07         | 2/27/2018 4:29:24 PM | User entered value |
| logp (XH +)                       | 0.50         | 2/28/2018 1:33:04 PM | User entered value |
| logP (neutral X)                  | 3.44         | 2/28/2018 1:33:10 PM | User entered value |

## Events

| Time    | Event             | Water      | Acid       | Base       | Octanol    | pH     | dpH/dt   | pH R-squared | pH SD   | dpH/dt time         |
|---------|-------------------|------------|------------|------------|------------|--------|----------|--------------|---------|---------------------|
| 8:59.8  | Initial pH = 8.94 |            |            |            |            |        |          |              |         |                     |
| 11:59.4 | Data point 1      | 1.50000 mL | 0.05127 mL | 0.00433 mL | 0.01999 mL | 1.999  | -0.00679 | 0.88781      | 0.00036 | 10.5 s              |
| 12:46.0 | Data point 2      | 1.50000 mL | 0.05127 mL | 0.01856 mL | 0.01999 mL | 2.206  | -0.00488 | 0.10282      | 0.00075 | 10.0 s              |
| 13:21.7 | Data point 3      | 1.50000 mL | 0.05127 mL | 0.02829 mL | 0.01999 mL | 2.420  | -0.00179 | 0.10235      | 0.00028 | 10.0 s              |
| 13:57.3 | Data point 4      | 1.50000 mL | 0.05127 mL | 0.03420 mL | 0.01999 mL | 2.634  | 0.00674  | 0.36990      | 0.00055 | 10.5 s              |
| 14:33.3 | Data point 5      | 1.50000 mL | 0.05127 mL | 0.03782 mL | 0.01999 mL | 2.871  | -0.00703 | 0.23966      | 0.00071 | 10.0 s              |
| 15:08.8 | Data point 6      | 1.50000 mL | 0.05127 mL | 0.03996 mL | 0.01999 mL | 3.075  | -0.00875 | 0.22861      | 0.00090 | 10.0 s              |
| 15:44.1 | Data point 7      | 1.50000 mL | 0.05127 mL | 0.04139 mL | 0.01999 mL | 3.301  | -0.00343 | 0.34132      | 0.00029 | 10.0 s              |
| 16:19.5 | Data point 8      | 1.50000 mL | 0.05127 mL | 0.04238 mL | 0.01999 mL | 3.554  | -0.00525 | 0.72590      | 0.00030 | 10.0 s              |
| 17:00.2 | Data point 9      | 1.50000 mL | 0.05127 mL | 0.04297 mL | 0.01999 mL | 3.748  | -0.00822 | 0.25539      | 0.00080 | 10.0 s              |
| 17:45.9 | Data point 10     | 1.50000 mL | 0.05127 mL | 0.04360 mL | 0.01999 mL | 3.985  | 0.00207  | 0.02036      | 0.00072 | 10.0 s              |
| 18:21.3 | Data point 11     | 1.50000 mL | 0.05127 mL | 0.04405 mL | 0.01999 mL | 4.187  | -0.00914 | 0.64694      | 0.00056 | 10.0 s              |
| 19:07.1 | Data point 12     | 1.50000 mL | 0.05127 mL | 0.04501 mL | 0.01999 mL | 4.469  | -0.01050 | 0.85079      | 0.00056 | 10.5 s              |
| 19:43.0 | Data point 13     | 1.50000 mL | 0.05127 mL | 0.04617 mL | 0.01999 mL | 4.732  | -0.00875 | 0.19263      | 0.00099 | 11.0 s              |
| 20:40.1 | Data point 14     | 1.50000 mL | 0.05127 mL | 0.04751 mL | 0.01999 mL | 4.944  | -0.00471 | 0.06280      | 0.00093 | 12.5 s              |
| 21:38.6 | Data point 15     | 1.50000 mL | 0.05127 mL | 0.04868 mL | 0.01999 mL | 5.133  | -0.01539 | 0.58584      | 0.00099 | 13.5 s              |
| 22:27.9 | Data point 16     | 1.50000 mL | 0.05127 mL | 0.05000 mL | 0.01999 mL | 5.497  | -0.01785 | 0.90166      | 0.00093 | 18.0 s              |
| 23:16.5 | Data point 17     | 1.50000 mL | 0.05127 mL | 0.05071 mL | 0.01999 mL | 5.789  | -0.01719 | 0.91631      | 0.00089 | 21.0 s              |
| 24:08.1 | Data point 18     | 1.50000 mL | 0.05127 mL | 0.05118 mL | 0.01999 mL | 6.202  | -0.01867 | 0.95635      | 0.00094 | 25.0 s              |
| 25:03.7 | Data point 19     | 1.50000 mL | 0.05127 mL | 0.05143 mL | 0.01999 mL | 6.626  | -0.01776 | 0.83266      | 0.00096 | 47.5 s              |
| 26:26.9 | Data point 20     | 1.50000 mL | 0.05127 mL | 0.05158 mL | 0.01999 mL | 6.945  | -0.01819 | 0.87488      | 0.00096 | 56.5 s              |
| 27:59.1 | Data point 21     | 1.50000 mL | 0.05127 mL | 0.05167 mL | 0.01999 mL | 7.402  | -0.04008 | 0.97402      | 0.00201 | Timed out at 59.5 s |
| 29:34.7 | Data point 22     | 1.50000 mL | 0.05127 mL | 0.05174 mL | 0.01999 mL | 7.954  | -0.04746 | 0.99119      | 0.00236 | Timed out at 59.5 s |
| 31:05.2 | Data point 23     | 1.50000 mL | 0.05127 mL | 0.05179 mL | 0.01999 mL | 8.360  | -0.02983 | 0.96268      | 0.00150 | Timed out at 59.5 s |
| 32:35.7 | Data point 24     | 1.50000 mL | 0.05127 mL | 0.05183 mL | 0.01999 mL | 8.683  | -0.01860 | 0.94531      | 0.00095 | 43.0 s              |
| 33:54.3 | Data point 25     | 1.50000 mL | 0.05127 mL | 0.05191 mL | 0.01999 mL | 8.994  | -0.01985 | 0.97488      | 0.00099 | 28.0 s              |
| 34:52.9 | Data point 26     | 1.50000 mL | 0.05127 mL | 0.05200 mL | 0.01999 mL | 9.245  | -0.01948 | 0.97749      | 0.00097 | 22.0 s              |
| 35:45.4 | Data point 27     | 1.50000 mL | 0.05127 mL | 0.05212 mL | 0.01999 mL | 9.487  | -0.01908 | 0.98282      | 0.00095 | 18.0 s              |
| 36:34.0 | Data point 28     | 1.50000 mL | 0.05127 mL | 0.05230 mL | 0.01999 mL | 9.769  | -0.01911 | 0.95487      | 0.00097 | 13.5 s              |
| 37:23.1 | Data point 29     | 1.50000 mL | 0.05127 mL | 0.05254 mL | 0.01999 mL | 9.959  | -0.01930 | 0.93400      | 0.00099 | 11.0 s              |
| 38:04.7 | Data point 30     | 1.50000 mL | 0.05127 mL | 0.05275 mL | 0.01999 mL | 10.086 | -0.01735 | 0.90522      | 0.00090 | 10.5 s              |
| 39:14.5 | Data point 31     | 1.50000 mL | 0.10745 mL | 0.05275 mL | 0.06999 mL | 1.956  | -0.00499 | 0.33277      | 0.00043 | 10.0 s              |
| 40:00.8 | Data point 32     | 1.50000 mL | 0.10745 mL | 0.06978 mL | 0.06999 mL | 2.157  | -0.00137 | 0.09377      | 0.00022 | 10.0 s              |
| 40:36.5 | Data point 33     | 1.50000 mL | 0.10745 mL | 0.08154 mL | 0.06999 mL | 2.389  | 0.01008  | 0.68241      | 0.00060 | 10.5 s              |
| 41:12.6 | Data point 34     | 1.50000 mL | 0.10745 mL | 0.08843 mL | 0.06999 mL | 2.603  | -0.00003 | 0.00007      | 0.00018 | 10.0 s              |
| 41:48.1 | Data point 35     | 1.50000 mL | 0.10745 mL | 0.09269 mL | 0.06999 mL | 2.825  | -0.00269 | 0.22934      | 0.00028 | 10.0 s              |
| 42:23.5 | Data point 36     | 1.50000 mL | 0.10745 mL | 0.09537 mL | 0.06999 mL | 3.033  | -0.00407 | 0.55814      | 0.00027 | 10.0 s              |
| 42:58.9 | Data point 37     | 1.50000 mL | 0.10745 mL | 0.09722 mL | 0.06999 mL | 3.227  | -0.00358 | 0.59751      | 0.00023 | 10.0 s              |

Sample name: **M07\_octanol**  
 Assay name: **pH-metric high logP**  
 Assay ID: **18B-28012**  
 Filename: **C:\Sirius\_T3\Mehtap\20180228\_exp28\_logP\_T3-2\18B-28012\_M07\_octanol\_pH-metric high logP.t3r**

Experiment start time: **2/28/2018 5:44:56 PM**  
 Analyst: **Pion**  
 Instrument ID: **T312060**

## Events (continued)

| Time      | Event         | Water      | Acid       | Base       | Octanol    | pH     | dpH/dt   | pH R-squared | pH SD   | dpH/dt time         |
|-----------|---------------|------------|------------|------------|------------|--------|----------|--------------|---------|---------------------|
| 43:34.4   | Data point 38 | 1.50000 mL | 0.10745 mL | 0.09868 mL | 0.06999 mL | 3.478  | -0.00403 | 0.43861      | 0.00030 | 10.0 s              |
| 44:25.3   | Data point 39 | 1.50000 mL | 0.10745 mL | 0.09962 mL | 0.06999 mL | 3.690  | -0.00498 | 0.42701      | 0.00038 | 10.0 s              |
| 45:00.7   | Data point 40 | 1.50000 mL | 0.10745 mL | 0.10026 mL | 0.06999 mL | 3.885  | -0.00655 | 0.31183      | 0.00058 | 10.0 s              |
| 45:41.4   | Data point 41 | 1.50000 mL | 0.10745 mL | 0.10108 mL | 0.06999 mL | 4.076  | -0.00350 | 0.03966      | 0.00087 | 10.0 s              |
| 46:27.2   | Data point 42 | 1.50000 mL | 0.10745 mL | 0.10205 mL | 0.06999 mL | 4.264  | -0.00534 | 0.73313      | 0.00031 | 10.0 s              |
| 47:18.1   | Data point 43 | 1.50000 mL | 0.10745 mL | 0.10313 mL | 0.06999 mL | 4.472  | -0.00695 | 0.55723      | 0.00046 | 10.0 s              |
| 47:53.5   | Data point 44 | 1.50000 mL | 0.10745 mL | 0.10412 mL | 0.06999 mL | 4.687  | 0.00135  | 0.00555      | 0.00090 | 10.0 s              |
| 48:28.9   | Data point 45 | 1.50000 mL | 0.10745 mL | 0.10487 mL | 0.06999 mL | 4.868  | -0.00089 | 0.00956      | 0.00045 | 10.5 s              |
| 49:04.9   | Data point 46 | 1.50000 mL | 0.10745 mL | 0.10543 mL | 0.06999 mL | 5.032  | 0.00810  | 0.39796      | 0.00063 | 11.0 s              |
| 49:46.4   | Data point 47 | 1.50000 mL | 0.10745 mL | 0.10597 mL | 0.06999 mL | 5.258  | 0.00679  | 0.13828      | 0.00090 | 11.0 s              |
| 50:28.0   | Data point 48 | 1.50000 mL | 0.10745 mL | 0.10635 mL | 0.06999 mL | 5.487  | 0.00018  | 0.00010      | 0.00089 | 11.5 s              |
| 51:10.0   | Data point 49 | 1.50000 mL | 0.10745 mL | 0.10661 mL | 0.06999 mL | 5.756  | -0.01673 | 0.85338      | 0.00089 | 14.5 s              |
| 51:55.1   | Data point 50 | 1.50000 mL | 0.10745 mL | 0.10682 mL | 0.06999 mL | 6.132  | -0.01877 | 0.87402      | 0.00099 | 19.5 s              |
| 52:45.2   | Data point 51 | 1.50000 mL | 0.10745 mL | 0.10694 mL | 0.06999 mL | 6.543  | -0.01943 | 0.92774      | 0.00100 | 51.5 s              |
| 54:07.2   | Data point 52 | 1.50000 mL | 0.10745 mL | 0.10703 mL | 0.06999 mL | 7.054  | -0.04976 | 0.98613      | 0.00247 | Timed out at 59.5 s |
| 55:37.7   | Data point 53 | 1.50000 mL | 0.10745 mL | 0.10713 mL | 0.06999 mL | 7.854  | -0.06673 | 0.98909      | 0.00331 | Timed out at 59.5 s |
| 57:13.3   | Data point 54 | 1.50000 mL | 0.10745 mL | 0.10720 mL | 0.06999 mL | 8.106  | -0.04215 | 0.99160      | 0.00209 | Timed out at 59.5 s |
| 58:43.8   | Data point 55 | 1.50000 mL | 0.10745 mL | 0.10724 mL | 0.06999 mL | 8.397  | -0.02007 | 0.98697      | 0.00100 | 50.5 s              |
| 1:00:10.1 | Data point 56 | 1.50000 mL | 0.10745 mL | 0.10731 mL | 0.06999 mL | 8.669  | -0.01679 | 0.97495      | 0.00084 | 38.0 s              |
| 1:01:23.7 | Data point 57 | 1.50000 mL | 0.10745 mL | 0.10741 mL | 0.06999 mL | 8.978  | -0.01933 | 0.92055      | 0.00099 | 29.5 s              |
| 1:02:23.8 | Data point 58 | 1.50000 mL | 0.10745 mL | 0.10755 mL | 0.06999 mL | 9.347  | -0.01767 | 0.84096      | 0.00095 | 14.5 s              |
| 1:03:08.8 | Data point 59 | 1.50000 mL | 0.10745 mL | 0.10771 mL | 0.06999 mL | 9.564  | -0.01365 | 0.77349      | 0.00077 | 15.5 s              |
| 1:03:54.9 | Data point 60 | 1.50000 mL | 0.10745 mL | 0.10793 mL | 0.06999 mL | 9.768  | -0.01979 | 0.95642      | 0.00100 | 13.5 s              |
| 1:04:44.1 | Data point 61 | 1.50000 mL | 0.10745 mL | 0.10821 mL | 0.06999 mL | 9.953  | -0.01717 | 0.91485      | 0.00089 | 10.5 s              |
| 1:05:25.1 | Data point 62 | 1.50000 mL | 0.10745 mL | 0.10837 mL | 0.06999 mL | 10.042 | -0.01543 | 0.86770      | 0.00082 | 10.0 s              |
| 1:06:39.2 | Data point 63 | 1.50000 mL | 0.16776 mL | 0.10837 mL | 0.31999 mL | 1.951  | -0.00886 | 0.78453      | 0.00049 | 10.0 s              |
| 1:07:25.4 | Data point 64 | 1.50000 mL | 0.16776 mL | 0.12737 mL | 0.31999 mL | 2.161  | 0.01497  | 0.60547      | 0.00095 | 10.5 s              |
| 1:08:01.6 | Data point 65 | 1.50000 mL | 0.16776 mL | 0.13989 mL | 0.31999 mL | 2.381  | 0.00407  | 0.78143      | 0.00023 | 10.0 s              |
| 1:08:37.2 | Data point 66 | 1.50000 mL | 0.16776 mL | 0.14751 mL | 0.31999 mL | 2.612  | 0.00821  | 0.51467      | 0.00056 | 10.0 s              |
| 1:09:12.7 | Data point 67 | 1.50000 mL | 0.16776 mL | 0.15221 mL | 0.31999 mL | 2.814  | -0.00211 | 0.44340      | 0.00016 | 10.5 s              |
| 1:09:48.8 | Data point 68 | 1.50000 mL | 0.16776 mL | 0.15548 mL | 0.31999 mL | 3.031  | -0.00824 | 0.29769      | 0.00075 | 10.0 s              |
| 1:10:24.3 | Data point 69 | 1.50000 mL | 0.16776 mL | 0.15788 mL | 0.31999 mL | 3.265  | -0.00300 | 0.73677      | 0.00017 | 10.0 s              |
| 1:10:59.7 | Data point 70 | 1.50000 mL | 0.16776 mL | 0.15981 mL | 0.31999 mL | 3.493  | -0.00479 | 0.74608      | 0.00027 | 10.0 s              |
| 1:11:35.2 | Data point 71 | 1.50000 mL | 0.16776 mL | 0.16148 mL | 0.31999 mL | 3.705  | -0.00484 | 0.90505      | 0.00025 | 10.5 s              |
| 1:12:11.2 | Data point 72 | 1.50000 mL | 0.16776 mL | 0.16291 mL | 0.31999 mL | 3.900  | -0.00806 | 0.48548      | 0.00057 | 10.5 s              |
| 1:12:47.1 | Data point 73 | 1.50000 mL | 0.16776 mL | 0.16414 mL | 0.31999 mL | 4.124  | -0.01087 | 0.62887      | 0.00068 | 10.0 s              |
| 1:13:22.5 | Data point 74 | 1.50000 mL | 0.16776 mL | 0.16505 mL | 0.31999 mL | 4.346  | -0.01000 | 0.57912      | 0.00065 | 10.0 s              |
| 1:13:58.0 | Data point 75 | 1.50000 mL | 0.16776 mL | 0.16571 mL | 0.31999 mL | 4.587  | -0.00486 | 0.06935      | 0.00091 | 11.0 s              |
| 1:14:34.4 | Data point 76 | 1.50000 mL | 0.16776 mL | 0.16613 mL | 0.31999 mL | 4.808  | 0.00762  | 0.26942      | 0.00072 | 11.0 s              |
| 1:15:10.8 | Data point 77 | 1.50000 mL | 0.16776 mL | 0.16642 mL | 0.31999 mL | 5.034  | -0.01627 | 0.71284      | 0.00095 | 11.0 s              |
| 1:15:47.2 | Data point 78 | 1.50000 mL | 0.16776 mL | 0.16658 mL | 0.31999 mL | 5.179  | 0.01179  | 0.55572      | 0.00078 | 11.5 s              |
| 1:16:29.3 | Data point 79 | 1.50000 mL | 0.16776 mL | 0.16677 mL | 0.31999 mL | 5.456  | -0.00292 | 0.02167      | 0.00098 | 11.5 s              |
| 1:17:11.3 | Data point 80 | 1.50000 mL | 0.16776 mL | 0.16689 mL | 0.31999 mL | 5.746  | -0.01772 | 0.96453      | 0.00089 | 23.5 s              |
| 1:18:05.3 | Data point 81 | 1.50000 mL | 0.16776 mL | 0.16700 mL | 0.31999 mL | 6.334  | -0.01888 | 0.94530      | 0.00096 | 59.0 s              |
| 1:19:35.0 | Data point 82 | 1.50000 mL | 0.16776 mL | 0.16707 mL | 0.31999 mL | 6.658  | -0.04000 | 0.97540      | 0.00200 | Timed out at 59.5 s |
| 1:21:05.5 | Data point 83 | 1.50000 mL | 0.16776 mL | 0.16714 mL | 0.31999 mL | 7.088  | -0.06280 | 0.99503      | 0.00311 | Timed out at 59.5 s |
| 1:22:36.0 | Data point 84 | 1.50000 mL | 0.16776 mL | 0.16719 mL | 0.31999 mL | 7.382  | -0.07007 | 0.99379      | 0.00347 | Timed out at 59.5 s |
| 1:24:06.5 | Data point 85 | 1.50000 mL | 0.16776 mL | 0.16724 mL | 0.31999 mL | 7.722  | -0.06487 | 0.99756      | 0.00321 | Timed out at 59.5 s |
| 1:25:37.0 | Data point 86 | 1.50000 mL | 0.16776 mL | 0.16729 mL | 0.31999 mL | 8.108  | -0.04105 | 0.99278      | 0.00203 | Timed out at 59.5 s |

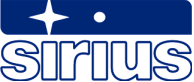

## Assay Events

Sample name: **M07\_octanol**  
Assay name: **pH-metric high logP**  
Assay ID: **18B-28012**  
Filename: **C:\Sirius\_T3\Mehtap\20180228\_exp28\_logP\_T3-2\18B-28012\_M07\_octanol\_pH-metric high logP.t3r**

Experiment start time: **2/28/2018 5:44:56 PM**  
Analyst: **Pion**  
Instrument ID: **T312060**

## Events (continued)

| Time      | Event         | Water      | Acid       | Base       | Octanol    | pH     | dpH/dt   | pH R-squared | pH SD   | dpH/dt time         |
|-----------|---------------|------------|------------|------------|------------|--------|----------|--------------|---------|---------------------|
| 1:27:12.6 | Data point 87 | 1.50000 mL | 0.16776 mL | 0.16736 mL | 0.31999 mL | 8.322  | -0.02438 | 0.97344      | 0.00122 | Timed out at 59.5 s |
| 1:28:48.2 | Data point 88 | 1.50000 mL | 0.16776 mL | 0.16743 mL | 0.31999 mL | 8.617  | -0.01662 | 0.76643      | 0.00094 | 22.0 s              |
| 1:29:51.0 | Data point 89 | 1.50000 mL | 0.16776 mL | 0.16752 mL | 0.31999 mL | 8.885  | -0.01802 | 0.91131      | 0.00093 | 27.0 s              |
| 1:30:58.8 | Data point 90 | 1.50000 mL | 0.16776 mL | 0.16764 mL | 0.31999 mL | 9.081  | -0.01665 | 0.80009      | 0.00092 | 14.5 s              |
| 1:31:49.0 | Data point 91 | 1.50000 mL | 0.16776 mL | 0.16778 mL | 0.31999 mL | 9.309  | -0.01346 | 0.47170      | 0.00097 | 11.5 s              |
| 1:32:41.3 | Data point 92 | 1.50000 mL | 0.16776 mL | 0.16797 mL | 0.31999 mL | 9.511  | -0.01581 | 0.68192      | 0.00095 | 15.0 s              |
| 1:33:37.1 | Data point 93 | 1.50000 mL | 0.16776 mL | 0.16818 mL | 0.31999 mL | 9.689  | -0.00057 | 0.00339      | 0.00048 | 10.5 s              |
| 1:34:28.5 | Data point 94 | 1.50000 mL | 0.16776 mL | 0.16846 mL | 0.31999 mL | 9.881  | -0.01835 | 0.83849      | 0.00099 | 11.5 s              |
| 1:35:10.5 | Data point 95 | 1.50000 mL | 0.16776 mL | 0.16867 mL | 0.31999 mL | 10.010 | 0.00024  | 0.00025      | 0.00075 | 10.0 s              |
| 1:35:29.7 | Assay volumes | 1.50000 mL | 0.16776 mL | 0.16867 mL | 0.31999 mL |        |          |              |         |                     |



Sample name: **M07\_octanol**  
 Assay name: **pH-metric high logP**  
 Assay ID: **18B-28012**  
 Filename: **C:\Sirius\_T3\Mehtap\20180228\_exp28\_logP\_T3-2\18B-28012\_M07\_octanol\_pH-metric high logP.t3r**

Experiment start time: **2/28/2018 5:44:56 PM**  
 Analyst: **Pion**  
 Instrument ID: **T312060**

## Assay Settings

| Setting                             | Value              | Original Value | Date/Time changed | Imported from |
|-------------------------------------|--------------------|----------------|-------------------|---------------|
| <b>General Settings</b>             |                    |                |                   |               |
| Analyst name                        | Pion               |                |                   |               |
| <b>Standard Experiment Settings</b> |                    |                |                   |               |
| Number of titrations                | 3                  |                |                   |               |
| Minimum pH                          | 2.000              |                |                   |               |
| Maximum pH                          | 10.000             |                |                   |               |
| pH step between points of           | 0.200              |                |                   |               |
| Minimum titrant addition            | 0.00002 mL         |                |                   |               |
| Maximum titrant addition            | 0.10000 mL         |                |                   |               |
| Argon flow rate                     | 100%               |                |                   |               |
| Start titration using               | Cautious pH adjust |                |                   |               |
| <b>Advanced General Settings</b>    |                    |                |                   |               |
| Detect turbidity using              | None               |                |                   |               |
| Collect turbidity sensor data       | No                 |                |                   |               |
| Collect UV spectra                  | No                 |                |                   |               |
| Stir after titrant addition for     | 5 seconds          |                |                   |               |
| For titrant addition, stir at       | 10%                |                |                   |               |
| <b>Titration Pre-Dose</b>           |                    |                |                   |               |
| Titration pre-dose                  | None               |                |                   |               |
| <b>Assay Medium</b>                 |                    |                |                   |               |
| ISA water volume                    | 1.50 mL            |                |                   |               |
| Water added                         | Automatic          |                |                   |               |
| Partition solvent type              | Octanol            |                |                   |               |
| Partition volume                    | 0.020 mL           |                |                   |               |
| Partition solvent added             | Automatic          |                |                   |               |
| After partition addition, stir for  | 1 seconds          |                |                   |               |
| <b>Sample Sonication</b>            |                    |                |                   |               |
| Sonicate                            | Yes                |                |                   |               |
| Adjust pH for sonication            | No                 |                |                   |               |
| Sonicate for                        | 300 seconds        |                |                   |               |
| After sonication stir for           | 5 seconds          |                |                   |               |
| <b>Sample Dissolution</b>           |                    |                |                   |               |
| Perform a dissolution stage         | Yes                |                |                   |               |
| Adjust and hold pH for dissolution  | To start pH        |                |                   |               |
| Stir to dissolve for                | 120 seconds        |                |                   |               |
| For dissolution, stir at            | 10%                |                |                   |               |
| <b>Carbonate purge</b>              |                    |                |                   |               |
| Perform a carbonate purge           | No                 |                |                   |               |
| <b>Temperature Control</b>          |                    |                |                   |               |
| Wait for temperature                | Yes                |                |                   |               |
| Required start temperature          | 25.0°C             |                |                   |               |
| Acceptable deviation                | 0.5°C              |                |                   |               |
| Time to wait                        | 60 seconds         |                |                   |               |
| Stir speed of                       | 50%                |                |                   |               |
| <b>Titration 1</b>                  |                    |                |                   |               |
| Titrate from                        | Low to high pH     |                |                   |               |
| Adjust to start pH                  | Yes                |                |                   |               |
| After pH adjust stir for            | 30 seconds         |                |                   |               |
| Stir to allow partitioning for      | 15 seconds         |                |                   |               |
| Stirrer speed for partitioning      | 50%                |                |                   |               |
| <b>Titration 2</b>                  |                    |                |                   |               |
| Titrate from                        | Low to high pH     |                |                   |               |
| Add additional water                | 0.00 mL            |                |                   |               |
| Additional partition solvent volume | 0.050 mL           |                |                   |               |
| Additional partition solvent added  | Automatic          |                |                   |               |
| After pH adjust stir for            | 30 seconds         |                |                   |               |
| Stir to allow partitioning for      | 15 seconds         |                |                   |               |
| Stirrer speed for partitioning      | 55%                |                |                   |               |



Sample name: **M07\_octanol** Experiment start time: **2/28/2018 5:44:56 PM**  
 Assay name: **pH-metric high logP** Analyst: **Pion**  
 Assay ID: **18B-28012** Instrument ID: **T312060**  
 Filename: **C:\Sirius\_T3\Mehtap\20180228\_exp28\_logP\_T3-2\18B-28012\_M07\_octanol\_pH-metric high logP.t3r**

## Assay Settings (continued)

| Setting                             | Value          | Original Value | Date/Time changed | Imported from |
|-------------------------------------|----------------|----------------|-------------------|---------------|
| <b>Titration 3</b>                  |                |                |                   |               |
| Titrate from                        | Low to high pH |                |                   |               |
| Add additional water                | 0.00 mL        |                |                   |               |
| Additional partition solvent volume | 0.250 mL       |                |                   |               |
| Additional partition solvent added  | Automatic      |                |                   |               |
| After pH adjust stir for            | 30 seconds     |                |                   |               |
| Stir to allow partitioning for      | 15 seconds     |                |                   |               |
| Stirrer speed for partitioning      | 60%            |                |                   |               |
| <b>Data Point Stability</b>         |                |                |                   |               |
| Stir during data point collection   | No             |                |                   |               |
| Delay before data point collection  | 0 seconds      |                |                   |               |
| Number of points to average         | 20 points      |                |                   |               |
| Time interval between points        | 0.50 seconds   |                |                   |               |
| Required maximum standard deviation | 0.00100 dpH/dt |                |                   |               |
| Stability timeout after             | 60 seconds     |                |                   |               |

## Calibration Settings

| Setting                   | Value  | Date/Time changed    | Imported from             |
|---------------------------|--------|----------------------|---------------------------|
| Four-Plus alpha           | 0.130  | 2/28/2018 5:44:56 PM | C:\Sirius_T3\HCl18B27.t3r |
| Four-Plus S               | 0.9970 | 2/28/2018 5:44:56 PM | C:\Sirius_T3\HCl18B27.t3r |
| Four-Plus jH              | 0.8    | 2/28/2018 5:44:56 PM | C:\Sirius_T3\HCl18B27.t3r |
| Four-Plus jOH             | -0.4   | 2/28/2018 5:44:56 PM | C:\Sirius_T3\HCl18B27.t3r |
| Base concentration factor | 1.000  | 2/28/2018 5:44:56 PM | C:\Sirius_T3\KOH18B27.t3r |
| Acid concentration factor | 0.994  | 2/28/2018 5:44:56 PM | C:\Sirius_T3\HCl18B27.t3r |

## Instrument Settings

| Setting              | Value                      | Batch Id    | Install date           |
|----------------------|----------------------------|-------------|------------------------|
| Instrument owner     | Merck                      |             |                        |
| Instrument ID        | T312060                    |             |                        |
| Instrument type      | T3 Simulator               |             |                        |
| Software version     | 1.1.3.0                    |             |                        |
| Dispenser module     |                            | T3DM1200361 | 3/31/2009 5:24:52 AM   |
| Dispenser 0          | Water                      |             | 3/31/2009 5:25:05 AM   |
| Syringe volume       | 2.5 mL                     |             |                        |
| Firmware version     | 1.2.1(r2)                  |             |                        |
| Titrant              | Water (0.15 M KCl)         | 02-06-2018  | 2/27/2018 10:05:59 AM  |
| Dispenser 2          | Acid                       |             | 3/31/2009 5:25:11 AM   |
| Syringe volume       | 0.5 mL                     |             |                        |
| Firmware version     | 1.2.1(r2)                  |             |                        |
| Titrant              | Acid (0.5 M HCl)           | 02-27-2018  | 2/27/2018 10:27:22 AM  |
| Dispenser 1          | Base                       |             | 3/31/2009 5:25:21 AM   |
| Syringe volume       | 0.5 mL                     |             |                        |
| Firmware version     | 1.2.1(r2)                  |             |                        |
| Titrant              | Base (0.5 M KOH)           | 9/22/2017   | 2/27/2018 10:21:22 AM  |
| Dispenser 5          | Cosolvent                  |             | 3/31/2009 5:26:24 AM   |
| Syringe volume       | 2.5 mL                     |             |                        |
| Firmware version     | 1.2.1(r2)                  |             |                        |
| Distribution valve 5 | Distribution Valve         |             | 3/31/2009 5:28:19 AM   |
| Firmware version     | 1.1.3                      |             |                        |
| Port A               | Methanol (80%, 0.15 M KCl) | 09-26-17    | 2/7/2018 9:42:01 AM    |
| Port B               | Cyclohexane                | 11-01-17    | 2/27/2018 10:37:57 AM  |
| Dispenser 3          | Buffer                     |             | 8/3/2010 5:05:16 AM    |
| Syringe volume       | 0.5 mL                     |             |                        |
| Firmware version     | 1.2.1(r2)                  |             |                        |
| Titrant              | Dodecane                   | 2018/01/31  | 2/28/2018 10:18:04 AM  |
| Dispenser 6          | Octanol                    |             | 10/22/2010 10:52:43 AM |

Sample name: **M07\_octanol**  
 Assay name: **pH-metric high logP**  
 Assay ID: **18B-28012**  
 Filename: **C:\Sirius\_T3\Mehtap\20180228\_exp28\_logP\_T3-2\18B-28012\_M07\_octanol\_pH-metric high logP.t3r**

Experiment start time: **2/28/2018 5:44:56 PM**  
 Analyst: **Pion**  
 Instrument ID: **T312060**

## Instrument Settings (continued)

| Setting                                   | Value                      | Batch Id    | Install date           |
|-------------------------------------------|----------------------------|-------------|------------------------|
| Syringe volume                            | 0.5 mL                     |             |                        |
| Firmware version                          | 1.2.1(r2)                  |             |                        |
| Titration                                 | Octanol                    | 01-31-2018  | 2/27/2018 9:59:35 AM   |
| Titration                                 |                            | T3TM1200161 | 3/31/2009 5:24:17 AM   |
| Horizontal axis firmware version          | 1.17 AI1DI2DO2 Stepper 2   |             |                        |
| Vertical axis firmware version            | 1.17 AI1DI2DO2 Stepper 2   |             |                        |
| Chassis I/O firmware version              | 1.11 AI1DI0DO4 Norgren I/O |             |                        |
| Probe I/O firmware version                | 1.1.1                      |             |                        |
| Electrode                                 | T3 Electrode               | T3E0923     | 1/23/2018 2:01:00 PM   |
| E0 calibration                            | +4.52 mV                   |             | 2/28/2018 5:45:24 PM   |
| Filling solution                          | 3M KCl                     | KCL097      | 2/27/2018 9:49:43 AM   |
| Liquids                                   |                            |             |                        |
| Wash 1                                    | 50% IPA:50% Water          |             | 2/28/2018 10:23:32 AM  |
| Wash 2                                    | 0.5% Triton X-100 in H2O   |             | 2/28/2018 10:23:34 AM  |
| Buffer position 1                         | pH7 Wash                   |             | 2/28/2018 10:24:06 AM  |
| Buffer position 2                         | pH 7                       |             | 2/28/2018 10:24:08 AM  |
| Storage position                          |                            |             | 2/28/2018 10:21:14 AM  |
| Wash water                                | 8.7e+003 mL                | 02-27-2018  | 2/27/2018 9:54:39 AM   |
| Waste                                     | 6.7e+003 mL                |             | 11/28/2017 10:36:29 AM |
| Temperature controller                    |                            |             | 8/5/2010 6:35:13 AM    |
| Turbidity detector                        |                            |             | 3/31/2009 5:24:45 AM   |
| Spectrometer                              |                            | 074811      | 11/23/2010 11:22:28 AM |
| Dip probe                                 |                            | 10196       |                        |
| Wavelength coefficient A0                 | 183.333                    |             |                        |
| Wavelength coefficient A1                 | 2.21568                    |             |                        |
| Wavelength coefficient A2                 | -0.000289308               |             |                        |
| Total lamp lit time                       | 112:08:55                  |             | 11/23/2010 11:22:28 AM |
| Calibrated on                             | 2/27/2018 10:40:38 AM      |             |                        |
| Integration time                          | 40                         |             |                        |
| Scans averaged                            | 10                         |             |                        |
| Autoloader                                |                            | T3AL1200345 | 11/10/2015 9:34:13 AM  |
| Left-right axis firmware version          | 1.17 AI1DI2DO2 Stepper 2   |             |                        |
| Front-back axis firmware version          | 1.17 AI1DI2DO2 Stepper 2   |             |                        |
| Vertical axis firmware version            | 1.17 AI1DI2DO2 Stepper 2   |             |                        |
| Chassis I/O firmware version              | 1.11 AI1DI0DO4 Norgren I/O |             |                        |
| Configuration                             |                            |             |                        |
| Alternate titration position              | Titration position         |             |                        |
| Alternate reference position              | Reference position         |             |                        |
| Maximum standard vial volume              | 3.50 mL                    |             |                        |
| Maximum alternate vial volume             | 25.00 mL                   |             |                        |
| Automatic action idle period              | 5 minute(s)                |             |                        |
| Titration tube volume                     | 1.3 mL                     |             |                        |
| Syringe flush count                       | 3.50                       |             |                        |
| Flowing wash pump volume                  | 20.0 mL                    |             |                        |
| Flowing wash stir duration                | 5 s                        |             |                        |
| Flowing wash stir speed                   | 30%                        |             |                        |
| Solvent wash stir duration                | 5 s                        |             |                        |
| Solvent wash stir speed                   | 30%                        |             |                        |
| Surfactant wash stir duration             | 5 s                        |             |                        |
| Surfactant wash stir speed                | 30%                        |             |                        |
| E0 calibration minimum number of points   | 10                         |             |                        |
| E0 calibration maximum standard deviation | 0.01500                    |             |                        |
| E0 calibration timeout period             | 60 s                       |             |                        |
| E0 calibration stir duration              | 5 s                        |             |                        |
| E0 calibration preparation stir speed     | 30%                        |             |                        |
| E0 calibration buffer wash stir duration  | 5 s                        |             |                        |
| E0 calibration buffer wash stir speed     | 30%                        |             |                        |
| E0 calibration reading stir speed         | 0%                         |             |                        |

Sample name: **M07\_octanol** Experiment start time: **2/28/2018 5:44:56 PM**  
 Assay name: **pH-metric high logP** Analyst: **Pion**  
 Assay ID: **18B-28012** Instrument ID: **T312060**  
 Filename: **C:\Sirius\_T3\Mehtap\20180228\_exp28\_logP\_T3-2\18B-28012\_M07\_octanol\_pH-metric high logP.t3r**

## Instrument Settings (continued)

| Setting                                     | Value   | Batch Id | Install date |
|---------------------------------------------|---------|----------|--------------|
| Spectrometer calibration stir duration      | 5 s     |          |              |
| Spectrometer calibration stir speed         | 30%     |          |              |
| Spectrometer calibration wash pump volume   | 20.0 mL |          |              |
| Spectrometer calibration wash stir duration | 5 s     |          |              |
| Spectrometer calibration wash stir speed    | 30%     |          |              |
| Overhead dispense height                    | 10000   |          |              |

## Refinement Settings

| Setting                        | Value    | Default value |
|--------------------------------|----------|---------------|
| Turbidity detection method     | None     | None          |
| Turbidity wavelength to assess | 500.0 nm | 500.0 nm      |
| Turbidity maximum absorbance   | 0.100    | 0.100         |
| Turbidity probe threshold      | 50.00    | 50.00         |

## Experiment Log

[2:37] Air gap created for Water (0.15 M KCl)  
 [2:38] Air gap created for Acid (0.5 M HCl)  
 [2:38] Air gap created for Base (0.5 M KOH)  
 [2:39] Air gap released for Water (0.15 M KCl)  
 [2:42] Titrator arm moved over Titration position  
 [2:42] Titration 1 of 3  
 [2:42] Adding initial titrants  
 [2:42] Automatically add 1.50000 mL of water  
 [3:08] Dispensed 1.500000 mL of Water (0.15 M KCl)  
 [3:12] Titrator arm moved over Drain  
 [8:53] Titrator arm moved to Titration position  
 [8:53] Argon flow rate set to 100  
 [8:53] Stirrer speed set to 10  
 [8:58] Automatically add 0.02000 mL of Octanol  
 [8:59] Dispensed 0.019991 mL of Octanol  
 [9:00] Initial pH = 8.94  
 [9:00] Iterative adjust 8.94 -> 2.00  
 [9:00] pH 8.94 -> 2.00  
 [9:02] Air gap released for Acid (0.5 M HCl)  
 [9:02] Dispensed 0.051270 mL of Acid (0.5 M HCl)  
 [9:08] Holding pH 2.00  
 [11:08] Stirrer speed set to 0  
 [11:08] Stirrer speed set to 50  
 [11:08] Iterative adjust 1.96 -> 2.00  
 [11:08] pH 1.96 -> 2.00  
 [11:08] Air gap released for Base (0.5 M KOH)  
 [11:09] Dispensed 0.004327 mL of Base (0.5 M KOH)  
 [12:00] Stirrer speed set to 0  
 [12:10] Datapoint id 1 collected  
 [12:10] Stirrer speed set to 50  
 [12:15] pH 2.01 -> 2.21  
 [12:15] Using cautious pH adjust  
 [12:15] Dispensed 0.007808 mL of Base (0.5 M KOH)  
 [12:21] Stepping pH = 2.10  
 [12:21] Dispensed 0.005550 mL of Base (0.5 M KOH)  
 [12:26] Stepping pH = 2.19  
 [12:26] Dispensed 0.000870 mL of Base (0.5 M KOH)  
 [12:31] Stepping pH = 2.21  
 [12:46] Stirrer speed set to 0  
 [12:56] Datapoint id 2 collected  
 [12:56] Charge balance equation is out by 8.8%  
 [12:56] Stirrer speed set to 50

Sample name: **M07\_octanol**  
Assay name: **pH-metric high logP**  
Assay ID: **18B-28012**  
Filename: **C:\Sirius\_T3\Mehtap\20180228\_exp28\_logP\_T3-2\18B-28012\_M07\_octanol\_pH-metric high logP.t3r**

Experiment start time: **2/28/2018 5:44:56 PM**  
Analyst: **Pion**  
Instrument ID: **T312060**

## Experiment Log (continued)

[13:01] pH 2.21 -> 2.41  
[13:01] Using charge balance adjust  
[13:02] Dispensed 0.009737 mL of Base (0.5 M KOH)  
[13:22] Stirrer speed set to 0  
[13:32] Datapoint id 3 collected  
[13:32] Charge balance equation is out by 4.0%  
[13:32] Stirrer speed set to 50  
[13:37] pH 2.43 -> 2.63  
[13:37] Using charge balance adjust  
[13:37] Dispensed 0.005903 mL of Base (0.5 M KOH)  
[13:57] Stirrer speed set to 0  
[14:08] Datapoint id 4 collected  
[14:08] Charge balance equation is out by 3.4%  
[14:08] Stirrer speed set to 50  
[14:13] pH 2.64 -> 2.84  
[14:13] Using charge balance adjust  
[14:13] Dispensed 0.003622 mL of Base (0.5 M KOH)  
[14:33] Stirrer speed set to 0  
[14:43] Datapoint id 5 collected  
[14:43] Charge balance equation is out by 13.9%  
[14:43] Stirrer speed set to 50  
[14:49] pH 2.88 -> 3.08  
[14:49] Using charge balance adjust  
[14:49] Dispensed 0.002140 mL of Base (0.5 M KOH)  
[15:09] Stirrer speed set to 0  
[15:19] Datapoint id 6 collected  
[15:19] Charge balance equation is out by -3.1%  
[15:19] Stirrer speed set to 50  
[15:24] pH 3.08 -> 3.28  
[15:24] Using charge balance adjust  
[15:24] Dispensed 0.001435 mL of Base (0.5 M KOH)  
[15:44] Stirrer speed set to 0  
[15:54] Datapoint id 7 collected  
[15:54] Charge balance equation is out by 8.5%  
[15:54] Stirrer speed set to 50  
[15:59] pH 3.31 -> 3.51  
[15:59] Using charge balance adjust  
[16:00] Dispensed 0.000988 mL of Base (0.5 M KOH)  
[16:20] Stirrer speed set to 0  
[16:30] Datapoint id 8 collected  
[16:30] Charge balance equation is out by 22.7%  
[16:30] Stirrer speed set to 50  
[16:35] pH 3.56 -> 3.76  
[16:35] Using cautious pH adjust  
[16:35] Dispensed 0.000400 mL of Base (0.5 M KOH)  
[16:40] Stepping pH = 3.68  
[16:40] Dispensed 0.000188 mL of Base (0.5 M KOH)  
[16:45] Stepping pH = 3.75  
[17:00] Stirrer speed set to 0  
[17:10] Datapoint id 9 collected  
[17:10] Charge balance equation is out by 25.4%  
[17:10] Stirrer speed set to 50  
[17:15] pH 3.76 -> 3.96  
[17:15] Using cautious pH adjust  
[17:16] Dispensed 0.000400 mL of Base (0.5 M KOH)  
[17:21] Stepping pH = 3.92  
[17:21] Dispensed 0.000071 mL of Base (0.5 M KOH)  
[17:26] Stepping pH = 3.93  
[17:26] Dispensed 0.000165 mL of Base (0.5 M KOH)

Sample name: **M07\_octanol**  
 Assay name: **pH-metric high logP**  
 Assay ID: **18B-28012**  
 Filename: **C:\Sirius\_T3\Mehtap\20180228\_exp28\_logP\_T3-2\18B-28012\_M07\_octanol\_pH-metric high logP.t3r**

Experiment start time: **2/28/2018 5:44:56 PM**  
 Analyst: **Pion**  
 Instrument ID: **T312060**

## Experiment Log (continued)

[17:31] Stepping pH = 3.99  
 [17:46] Stirrer speed set to 0  
 [17:56] Datapoint id 10 collected  
 [17:56] Charge balance equation is out by 18.0%  
 [17:56] Stirrer speed set to 50  
 [18:01] pH 4.00 -> 4.20  
 [18:01] Using cautious pH adjust  
 [18:01] Dispensed 0.000447 mL of Base (0.5 M KOH)  
 [18:06] Stepping pH = 4.20  
 [18:21] Stirrer speed set to 0  
 [18:32] Datapoint id 11 collected  
 [18:32] Charge balance equation is out by 50.0%  
 [18:32] Stirrer speed set to 50  
 [18:37] pH 4.20 -> 4.40  
 [18:37] Using cautious pH adjust  
 [18:37] Dispensed 0.000517 mL of Base (0.5 M KOH)  
 [18:42] Stepping pH = 4.38  
 [18:42] Dispensed 0.000071 mL of Base (0.5 M KOH)  
 [18:47] Stepping pH = 4.37  
 [18:47] Dispensed 0.000376 mL of Base (0.5 M KOH)  
 [18:52] Stepping pH = 4.48  
 [19:07] Stirrer speed set to 0  
 [19:18] Datapoint id 12 collected  
 [19:18] Charge balance equation is out by 7.7%  
 [19:18] Stirrer speed set to 50  
 [19:23] pH 4.48 -> 4.68  
 [19:23] Using charge balance adjust  
 [19:23] Dispensed 0.001152 mL of Base (0.5 M KOH)  
 [19:43] Stirrer speed set to 0  
 [19:54] Datapoint id 13 collected  
 [19:54] Charge balance equation is out by 27.1%  
 [19:54] Stirrer speed set to 50  
 [19:59] pH 4.74 -> 4.94  
 [19:59] Using cautious pH adjust  
 [19:59] Dispensed 0.000541 mL of Base (0.5 M KOH)  
 [20:04] Stepping pH = 4.85  
 [20:05] Dispensed 0.000353 mL of Base (0.5 M KOH)  
 [20:10] Stepping pH = 4.90  
 [20:10] Dispensed 0.000212 mL of Base (0.5 M KOH)  
 [20:15] Stepping pH = 4.93  
 [20:15] Dispensed 0.000071 mL of Base (0.5 M KOH)  
 [20:20] Stepping pH = 4.93  
 [20:20] Dispensed 0.000165 mL of Base (0.5 M KOH)  
 [20:25] Stepping pH = 4.98  
 [20:40] Stirrer speed set to 0  
 [20:53] Datapoint id 14 collected  
 [20:53] Charge balance equation is out by -21.6%  
 [20:53] Stirrer speed set to 50  
 [20:58] pH 4.96 -> 5.16  
 [20:58] Using cautious pH adjust  
 [20:58] Dispensed 0.000470 mL of Base (0.5 M KOH)  
 [21:03] Stepping pH = 5.07  
 [21:03] Dispensed 0.000282 mL of Base (0.5 M KOH)  
 [21:08] Stepping pH = 5.12  
 [21:08] Dispensed 0.000188 mL of Base (0.5 M KOH)  
 [21:13] Stepping pH = 5.14  
 [21:13] Dispensed 0.000118 mL of Base (0.5 M KOH)  
 [21:19] Stepping pH = 5.15  
 [21:19] Dispensed 0.000118 mL of Base (0.5 M KOH)

Sample name: **M07\_octanol**  
Assay name: **pH-metric high logP**  
Assay ID: **18B-28012**  
Filename: **C:\Sirius\_T3\Mehtap\20180228\_exp28\_logP\_T3-2\18B-28012\_M07\_octanol\_pH-metric high logP.t3r**

Experiment start time: **2/28/2018 5:44:56 PM**  
Analyst: **Pion**  
Instrument ID: **T312060**

## Experiment Log (continued)

[21:24] Stepping pH = 5.18  
[21:39] Stirrer speed set to 0  
[21:52] Datapoint id 15 collected  
[21:52] Charge balance equation is out by -25.4%  
[21:52] Stirrer speed set to 50  
[21:57] pH 5.17 -> 5.37  
[21:57] Using cautious pH adjust  
[21:58] Dispensed 0.000376 mL of Base (0.5 M KOH)  
[22:03] Stepping pH = 5.30  
[22:03] Dispensed 0.000141 mL of Base (0.5 M KOH)  
[22:08] Stepping pH = 5.29  
[22:08] Dispensed 0.000800 mL of Base (0.5 M KOH)  
[22:13] Stepping pH = 5.59  
[22:28] Stirrer speed set to 0  
[22:46] Datapoint id 16 collected  
[22:46] Charge balance equation is out by -79.4%  
[22:46] Stirrer speed set to 50  
[22:51] pH 5.54 -> 5.74  
[22:51] Using cautious pH adjust  
[22:51] Dispensed 0.000212 mL of Base (0.5 M KOH)  
[22:56] Stepping pH = 5.57  
[22:56] Dispensed 0.000494 mL of Base (0.5 M KOH)  
[23:02] Stepping pH = 5.89  
[23:17] Stirrer speed set to 0  
[23:38] Datapoint id 17 collected  
[23:38] Charge balance equation is out by -72.2%  
[23:38] Stirrer speed set to 50  
[23:43] pH 5.84 -> 6.04  
[23:43] Using cautious pH adjust  
[23:43] Dispensed 0.000118 mL of Base (0.5 M KOH)  
[23:48] Stepping pH = 5.85  
[23:48] Dispensed 0.000353 mL of Base (0.5 M KOH)  
[23:53] Stepping pH = 6.29  
[24:08] Stirrer speed set to 0  
[24:33] Datapoint id 18 collected  
[24:33] Charge balance equation is out by -89.2%  
[24:33] Stirrer speed set to 50  
[24:38] pH 6.26 -> 6.46  
[24:38] Using cautious pH adjust  
[24:38] Dispensed 0.000071 mL of Base (0.5 M KOH)  
[24:44] Stepping pH = 6.26  
[24:44] Dispensed 0.000188 mL of Base (0.5 M KOH)  
[24:49] Stepping pH = 6.68  
[25:04] Stirrer speed set to 0  
[25:51] Datapoint id 19 collected  
[25:51] Charge balance equation is out by -96.9%  
[25:51] Stirrer speed set to 50  
[25:57] pH 6.69 -> 6.89  
[25:57] Using cautious pH adjust  
[25:57] Dispensed 0.000024 mL of Base (0.5 M KOH)  
[26:02] Stepping pH = 6.70  
[26:02] Dispensed 0.000094 mL of Base (0.5 M KOH)  
[26:07] Stepping pH = 6.87  
[26:07] Dispensed 0.000024 mL of Base (0.5 M KOH)  
[26:12] Stepping pH = 6.96  
[26:27] Stirrer speed set to 0  
[27:24] Datapoint id 20 collected  
[27:24] Charge balance equation is out by -124.8%  
[27:24] Stirrer speed set to 50



Sample name: **M07\_octanol**  
Assay name: **pH-metric high logP**  
Assay ID: **18B-28012**  
Filename: **C:\Sirius\_T3\Mehtap\20180228\_exp28\_logP\_T3-2\18B-28012\_M07\_octanol\_pH-metric high logP.t3r**

Experiment start time: **2/28/2018 5:44:56 PM**  
Analyst: **Pion**  
Instrument ID: **T312060**

## Experiment Log (continued)

[27:29] pH 7.02 -> 7.22  
[27:29] Using cautious pH adjust  
[27:29] Dispensed 0.000024 mL of Base (0.5 M KOH)  
[27:34] Stepping pH = 7.04  
[27:34] Dispensed 0.000047 mL of Base (0.5 M KOH)  
[27:39] Stepping pH = 7.19  
[27:39] Dispensed 0.000024 mL of Base (0.5 M KOH)  
[27:44] Stepping pH = 7.38  
[27:59] Stirrer speed set to 0  
[28:59] Datapoint id 21 collected  
[28:59] Charge balance equation is out by -161.1%  
[28:59] Stirrer speed set to 50  
[29:04] pH 7.46 -> 7.66  
[29:04] Using cautious pH adjust  
[29:04] Dispensed 0.000024 mL of Base (0.5 M KOH)  
[29:09] Stepping pH = 7.49  
[29:10] Dispensed 0.000024 mL of Base (0.5 M KOH)  
[29:15] Stepping pH = 7.60  
[29:15] Dispensed 0.000024 mL of Base (0.5 M KOH)  
[29:20] Stepping pH = 7.84  
[29:35] Stirrer speed set to 0  
[30:35] Datapoint id 22 collected  
[30:35] Charge balance equation is out by -351.4%  
[30:35] Stirrer speed set to 50  
[30:40] pH 7.98 -> 8.18  
[30:40] Using cautious pH adjust  
[30:40] Dispensed 0.000024 mL of Base (0.5 M KOH)  
[30:45] Stepping pH = 8.02  
[30:45] Dispensed 0.000024 mL of Base (0.5 M KOH)  
[30:50] Stepping pH = 8.26  
[31:05] Stirrer speed set to 0  
[32:05] Datapoint id 23 collected  
[32:05] Charge balance equation is out by -398.6%  
[32:05] Stirrer speed set to 50  
[32:10] pH 8.42 -> 8.62  
[32:10] Using cautious pH adjust  
[32:10] Dispensed 0.000024 mL of Base (0.5 M KOH)  
[32:16] Stepping pH = 8.45  
[32:16] Dispensed 0.000024 mL of Base (0.5 M KOH)  
[32:21] Stepping pH = 8.64  
[32:36] Stirrer speed set to 0  
[33:19] Datapoint id 24 collected  
[33:19] Charge balance equation is out by -209.9%  
[33:19] Stirrer speed set to 50  
[33:24] pH 8.71 -> 8.91  
[33:24] Using cautious pH adjust  
[33:24] Dispensed 0.000024 mL of Base (0.5 M KOH)  
[33:29] Stepping pH = 8.73  
[33:29] Dispensed 0.000024 mL of Base (0.5 M KOH)  
[33:34] Stepping pH = 8.84  
[33:34] Dispensed 0.000024 mL of Base (0.5 M KOH)  
[33:39] Stepping pH = 8.98  
[33:55] Stirrer speed set to 0  
[34:23] Datapoint id 25 collected  
[34:23] Charge balance equation is out by -216.2%  
[34:23] Stirrer speed set to 50  
[34:28] pH 9.01 -> 9.21  
[34:28] Using cautious pH adjust  
[34:28] Dispensed 0.000024 mL of Base (0.5 M KOH)

Sample name: **M07\_octanol**  
Assay name: **pH-metric high logP**  
Assay ID: **18B-28012**  
Filename: **C:\Sirius\_T3\Mehtap\20180228\_exp28\_logP\_T3-2\18B-28012\_M07\_octanol\_pH-metric high logP.t3r**

Experiment start time: **2/28/2018 5:44:56 PM**  
Analyst: **Pion**  
Instrument ID: **T312060**

## Experiment Log (continued)

[34:33] Stepping pH = 9.01  
[34:33] Dispensed 0.000071 mL of Base (0.5 M KOH)  
[34:38] Stepping pH = 9.23  
[34:53] Stirrer speed set to 0  
[35:15] Datapoint id 26 collected  
[35:15] Charge balance equation is out by -96.5%  
[35:15] Stirrer speed set to 50  
[35:20] pH 9.25 -> 9.45  
[35:20] Using cautious pH adjust  
[35:20] Dispensed 0.000024 mL of Base (0.5 M KOH)  
[35:25] Stepping pH = 9.25  
[35:25] Dispensed 0.000094 mL of Base (0.5 M KOH)  
[35:30] Stepping pH = 9.48  
[35:46] Stirrer speed set to 0  
[36:04] Datapoint id 27 collected  
[36:04] Charge balance equation is out by -96.5%  
[36:04] Stirrer speed set to 50  
[36:09] pH 9.49 -> 9.69  
[36:09] Using cautious pH adjust  
[36:09] Dispensed 0.000047 mL of Base (0.5 M KOH)  
[36:14] Stepping pH = 9.51  
[36:14] Dispensed 0.000141 mL of Base (0.5 M KOH)  
[36:19] Stepping pH = 9.77  
[36:34] Stirrer speed set to 0  
[36:48] Datapoint id 28 collected  
[36:48] Charge balance equation is out by -78.5%  
[36:48] Stirrer speed set to 50  
[36:53] pH 9.77 -> 9.97  
[36:53] Using cautious pH adjust  
[36:53] Dispensed 0.000094 mL of Base (0.5 M KOH)  
[36:58] Stepping pH = 9.84  
[36:58] Dispensed 0.000118 mL of Base (0.5 M KOH)  
[37:03] Stepping pH = 9.96  
[37:03] Dispensed 0.000024 mL of Base (0.5 M KOH)  
[37:08] Stepping pH = 9.97  
[37:23] Stirrer speed set to 0  
[37:34] Datapoint id 29 collected  
[37:34] Charge balance equation is out by -18.4%  
[37:34] Stirrer speed set to 50  
[37:39] pH 9.96 -> 10.05  
[37:39] Using cautious pH adjust  
[37:39] Dispensed 0.000047 mL of Base (0.5 M KOH)  
[37:45] Stepping pH = 9.96  
[37:45] Dispensed 0.000165 mL of Base (0.5 M KOH)  
[37:50] Stepping pH = 10.10  
[38:05] Stirrer speed set to 0  
[38:15] Datapoint id 30 collected  
[38:15] Charge balance equation is out by -90.3%  
[38:15] Titration 2 of 3  
[38:15] Adding initial titrants  
[38:15] Automatically add 0.05000 mL of Octanol  
[38:17] Dispensed 0.050000 mL of Octanol  
[38:17] Stirrer speed set to 10  
[38:18] Stirrer speed set to 55  
[38:18] Iterative adjust 10.09 -> 2.00  
[38:18] pH 10.09 -> 2.00  
[38:19] Dispensed 0.054774 mL of Acid (0.5 M HCl)  
[38:24] pH 2.01 -> 2.00  
[38:24] Dispensed 0.001411 mL of Acid (0.5 M HCl)



Sample name: **M07\_octanol**  
Assay name: **pH-metric high logP**  
Assay ID: **18B-28012**  
Filename: **C:\Sirius\_T3\Mehtap\20180228\_exp28\_logP\_T3-2\18B-28012\_M07\_octanol\_pH-metric high logP.t3r**

Experiment start time: **2/28/2018 5:44:56 PM**  
Analyst: **Pion**  
Instrument ID: **T312060**

## Experiment Log (continued)

[39:15] Stirrer speed set to 0  
[39:25] Datapoint id 31 collected  
[39:25] Stirrer speed set to 55  
[39:30] pH 1.96 -> 2.16  
[39:30] Using cautious pH adjust  
[39:30] Dispensed 0.009337 mL of Base (0.5 M KOH)  
[39:35] Stepping pH = 2.06  
[39:35] Dispensed 0.005809 mL of Base (0.5 M KOH)  
[39:41] Stepping pH = 2.13  
[39:41] Dispensed 0.001881 mL of Base (0.5 M KOH)  
[39:46] Stepping pH = 2.16  
[40:01] Stirrer speed set to 0  
[40:11] Datapoint id 32 collected  
[40:11] Charge balance equation is out by 8.8%  
[40:11] Stirrer speed set to 55  
[40:16] pH 2.16 -> 2.36  
[40:16] Using charge balance adjust  
[40:16] Dispensed 0.011759 mL of Base (0.5 M KOH)  
[40:37] Stirrer speed set to 0  
[40:47] Datapoint id 33 collected  
[40:47] Charge balance equation is out by 14.2%  
[40:47] Stirrer speed set to 55  
[40:52] pH 2.39 -> 2.59  
[40:52] Using charge balance adjust  
[40:53] Dispensed 0.006891 mL of Base (0.5 M KOH)  
[41:13] Stirrer speed set to 0  
[41:23] Datapoint id 34 collected  
[41:23] Charge balance equation is out by 4.7%  
[41:23] Stirrer speed set to 55  
[41:28] pH 2.61 -> 2.81  
[41:28] Using charge balance adjust  
[41:28] Dispensed 0.004257 mL of Base (0.5 M KOH)  
[41:48] Stirrer speed set to 0  
[41:58] Datapoint id 35 collected  
[41:58] Charge balance equation is out by 7.3%  
[41:58] Stirrer speed set to 55  
[42:03] pH 2.83 -> 3.03  
[42:03] Using charge balance adjust  
[42:03] Dispensed 0.002681 mL of Base (0.5 M KOH)  
[42:24] Stirrer speed set to 0  
[42:34] Datapoint id 36 collected  
[42:34] Charge balance equation is out by 0.1%  
[42:34] Stirrer speed set to 55  
[42:39] pH 3.04 -> 3.24  
[42:39] Using charge balance adjust  
[42:39] Dispensed 0.001858 mL of Base (0.5 M KOH)  
[42:59] Stirrer speed set to 0  
[43:09] Datapoint id 37 collected  
[43:09] Charge balance equation is out by -6.5%  
[43:09] Stirrer speed set to 55  
[43:14] pH 3.23 -> 3.43  
[43:14] Using charge balance adjust  
[43:14] Dispensed 0.001458 mL of Base (0.5 M KOH)  
[43:35] Stirrer speed set to 0  
[43:45] Datapoint id 38 collected  
[43:45] Charge balance equation is out by 21.9%  
[43:45] Stirrer speed set to 55  
[43:50] pH 3.49 -> 3.69  
[43:50] Using cautious pH adjust

Sample name: **M07\_octanol**  
Assay name: **pH-metric high logP**  
Assay ID: **18B-28012**  
Filename: **C:\Sirius\_T3\Mehtap\20180228\_exp28\_logP\_T3-2\18B-28012\_M07\_octanol\_pH-metric high logP.t3r**

Experiment start time: **2/28/2018 5:44:56 PM**  
Analyst: **Pion**  
Instrument ID: **T312060**

## Experiment Log (continued)

[43:50] Dispensed 0.000635 mL of Base (0.5 M KOH)  
[43:55] Stepping pH = 3.64  
[43:55] Dispensed 0.000165 mL of Base (0.5 M KOH)  
[44:00] Stepping pH = 3.67  
[44:00] Dispensed 0.000047 mL of Base (0.5 M KOH)  
[44:05] Stepping pH = 3.68  
[44:05] Dispensed 0.000094 mL of Base (0.5 M KOH)  
[44:10] Stepping pH = 3.70  
[44:25] Stirrer speed set to 0  
[44:36] Datapoint id 39 collected  
[44:36] Charge balance equation is out by 24.8%  
[44:36] Stirrer speed set to 55  
[44:41] pH 3.70 -> 3.90  
[44:41] Using cautious pH adjust  
[44:41] Dispensed 0.000635 mL of Base (0.5 M KOH)  
[44:46] Stepping pH = 3.89  
[45:01] Stirrer speed set to 0  
[45:11] Datapoint id 40 collected  
[45:11] Charge balance equation is out by 50.0%  
[45:11] Stirrer speed set to 55  
[45:16] pH 3.89 -> 4.09  
[45:16] Using cautious pH adjust  
[45:16] Dispensed 0.000635 mL of Base (0.5 M KOH)  
[45:21] Stepping pH = 4.04  
[45:21] Dispensed 0.000188 mL of Base (0.5 M KOH)  
[45:26] Stepping pH = 4.08  
[45:42] Stirrer speed set to 0  
[45:52] Datapoint id 41 collected  
[45:52] Charge balance equation is out by 35.8%  
[45:52] Stirrer speed set to 55  
[45:57] pH 4.08 -> 4.28  
[45:57] Using cautious pH adjust  
[45:57] Dispensed 0.000635 mL of Base (0.5 M KOH)  
[46:02] Stepping pH = 4.22  
[46:02] Dispensed 0.000235 mL of Base (0.5 M KOH)  
[46:07] Stepping pH = 4.26  
[46:07] Dispensed 0.000094 mL of Base (0.5 M KOH)  
[46:12] Stepping pH = 4.27  
[46:27] Stirrer speed set to 0  
[46:37] Datapoint id 42 collected  
[46:37] Charge balance equation is out by 24.0%  
[46:37] Stirrer speed set to 55  
[46:42] pH 4.27 -> 4.47  
[46:42] Using cautious pH adjust  
[46:43] Dispensed 0.000588 mL of Base (0.5 M KOH)  
[46:48] Stepping pH = 4.40  
[46:48] Dispensed 0.000282 mL of Base (0.5 M KOH)  
[46:53] Stepping pH = 4.45  
[46:53] Dispensed 0.000094 mL of Base (0.5 M KOH)  
[46:58] Stepping pH = 4.46  
[46:58] Dispensed 0.000118 mL of Base (0.5 M KOH)  
[47:03] Stepping pH = 4.48  
[47:18] Stirrer speed set to 0  
[47:28] Datapoint id 43 collected  
[47:28] Charge balance equation is out by 8.5%  
[47:28] Stirrer speed set to 55  
[47:33] pH 4.48 -> 4.68  
[47:33] Using charge balance adjust  
[47:33] Dispensed 0.000988 mL of Base (0.5 M KOH)

Sample name: **M07\_octanol**  
 Assay name: **pH-metric high logP**  
 Assay ID: **18B-28012**  
 Filename: **C:\Sirius\_T3\Mehtap\20180228\_exp28\_logP\_T3-2\18B-28012\_M07\_octanol\_pH-metric high logP.t3r**

Experiment start time: **2/28/2018 5:44:56 PM**  
 Analyst: **Pion**  
 Instrument ID: **T312060**

## Experiment Log (continued)

[47:54] Stirrer speed set to 0  
 [48:04] Datapoint id 44 collected  
 [48:04] Charge balance equation is out by 3.3%  
 [48:04] Stirrer speed set to 55  
 [48:09] pH 4.70 -> 4.90  
 [48:09] Using charge balance adjust  
 [48:09] Dispensed 0.000753 mL of Base (0.5 M KOH)  
 [48:29] Stirrer speed set to 0  
 [48:40] Datapoint id 45 collected  
 [48:40] Charge balance equation is out by -14.9%  
 [48:40] Stirrer speed set to 55  
 [48:45] pH 4.88 -> 5.08  
 [48:45] Using charge balance adjust  
 [48:45] Dispensed 0.000564 mL of Base (0.5 M KOH)  
 [49:05] Stirrer speed set to 0  
 [49:16] Datapoint id 46 collected  
 [49:16] Charge balance equation is out by -25.1%  
 [49:16] Stirrer speed set to 55  
 [49:21] pH 5.05 -> 5.25  
 [49:21] Using cautious pH adjust  
 [49:21] Dispensed 0.000212 mL of Base (0.5 M KOH)  
 [49:26] Stepping pH = 5.10  
 [49:26] Dispensed 0.000329 mL of Base (0.5 M KOH)  
 [49:31] Stepping pH = 5.27  
 [49:47] Stirrer speed set to 0  
 [49:58] Datapoint id 47 collected  
 [49:58] Charge balance equation is out by -26.5%  
 [49:58] Stirrer speed set to 55  
 [50:03] pH 5.28 -> 5.48  
 [50:03] Using cautious pH adjust  
 [50:03] Dispensed 0.000141 mL of Base (0.5 M KOH)  
 [50:08] Stepping pH = 5.32  
 [50:08] Dispensed 0.000235 mL of Base (0.5 M KOH)  
 [50:13] Stepping pH = 5.50  
 [50:28] Stirrer speed set to 0  
 [50:40] Datapoint id 48 collected  
 [50:40] Charge balance equation is out by -34.5%  
 [50:40] Stirrer speed set to 55  
 [50:45] pH 5.52 -> 5.72  
 [50:45] Using cautious pH adjust  
 [50:45] Dispensed 0.000094 mL of Base (0.5 M KOH)  
 [50:50] Stepping pH = 5.55  
 [50:50] Dispensed 0.000165 mL of Base (0.5 M KOH)  
 [50:55] Stepping pH = 5.77  
 [51:10] Stirrer speed set to 0  
 [51:25] Datapoint id 49 collected  
 [51:25] Charge balance equation is out by -41.4%  
 [51:25] Stirrer speed set to 55  
 [51:30] pH 5.79 -> 5.99  
 [51:30] Using cautious pH adjust  
 [51:30] Dispensed 0.000071 mL of Base (0.5 M KOH)  
 [51:35] Stepping pH = 5.82  
 [51:35] Dispensed 0.000141 mL of Base (0.5 M KOH)  
 [51:40] Stepping pH = 6.15  
 [51:55] Stirrer speed set to 0  
 [52:15] Datapoint id 50 collected  
 [52:15] Charge balance equation is out by -59.1%  
 [52:15] Stirrer speed set to 55  
 [52:20] pH 6.18 -> 6.38

Sample name: **M07\_octanol**  
Assay name: **pH-metric high logP**  
Assay ID: **18B-28012**  
Filename: **C:\Sirius\_T3\Mehtap\20180228\_exp28\_logP\_T3-2\18B-28012\_M07\_octanol\_pH-metric high logP.t3r**

Experiment start time: **2/28/2018 5:44:56 PM**  
Analyst: **Pion**  
Instrument ID: **T312060**

## Experiment Log (continued)

[52:20] Using cautious pH adjust  
[52:20] Dispensed 0.000047 mL of Base (0.5 M KOH)  
[52:25] Stepping pH = 6.22  
[52:25] Dispensed 0.000071 mL of Base (0.5 M KOH)  
[52:30] Stepping pH = 6.55  
[52:45] Stirrer speed set to 0  
[53:37] Datapoint id 51 collected  
[53:37] Charge balance equation is out by -52.2%  
[53:37] Stirrer speed set to 55  
[53:42] pH 6.63 -> 6.83  
[53:42] Using cautious pH adjust  
[53:42] Dispensed 0.000024 mL of Base (0.5 M KOH)  
[53:47] Stepping pH = 6.64  
[53:47] Dispensed 0.000071 mL of Base (0.5 M KOH)  
[53:52] Stepping pH = 7.11  
[54:07] Stirrer speed set to 0  
[55:07] Datapoint id 52 collected  
[55:07] Charge balance equation is out by -86.4%  
[55:07] Stirrer speed set to 55  
[55:13] pH 7.04 -> 7.24  
[55:13] Using cautious pH adjust  
[55:13] Dispensed 0.000024 mL of Base (0.5 M KOH)  
[55:18] Stepping pH = 7.01  
[55:18] Dispensed 0.000071 mL of Base (0.5 M KOH)  
[55:23] Stepping pH = 7.76  
[55:38] Stirrer speed set to 0  
[56:38] Datapoint id 53 collected  
[56:38] Charge balance equation is out by -279.5%  
[56:38] Stirrer speed set to 55  
[56:43] pH 7.97 -> 8.17  
[56:43] Using cautious pH adjust  
[56:43] Dispensed 0.000024 mL of Base (0.5 M KOH)  
[56:48] Stepping pH = 8.01  
[56:48] Dispensed 0.000024 mL of Base (0.5 M KOH)  
[56:53] Stepping pH = 8.15  
[56:53] Dispensed 0.000024 mL of Base (0.5 M KOH)  
[56:58] Stepping pH = 8.29  
[57:14] Stirrer speed set to 0  
[58:14] Datapoint id 54 collected  
[58:14] Charge balance equation is out by -699.4%  
[58:14] Stirrer speed set to 55  
[58:19] pH 8.07 -> 8.27  
[58:19] Using cautious pH adjust  
[58:19] Dispensed 0.000024 mL of Base (0.5 M KOH)  
[58:24] Stepping pH = 8.04  
[58:24] Dispensed 0.000024 mL of Base (0.5 M KOH)  
[58:29] Stepping pH = 8.33  
[58:44] Stirrer speed set to 0  
[59:35] Datapoint id 55 collected  
[59:35] Charge balance equation is out by -428.0%  
[59:35] Stirrer speed set to 55  
[59:40] pH 8.41 -> 8.61  
[59:40] Using cautious pH adjust  
[59:40] Dispensed 0.000024 mL of Base (0.5 M KOH)  
[59:45] Stepping pH = 8.45  
[59:45] Dispensed 0.000024 mL of Base (0.5 M KOH)  
[59:50] Stepping pH = 8.56  
[59:50] Dispensed 0.000024 mL of Base (0.5 M KOH)  
[59:55] Stepping pH = 8.69

Sample name: **M07\_octanol**  
Assay name: **pH-metric high logP**  
Assay ID: **18B-28012**  
Filename: **C:\Sirius\_T3\Mehtap\20180228\_exp28\_logP\_T3-2\18B-28012\_M07\_octanol\_pH-metric high logP.t3r**

Experiment start time: **2/28/2018 5:44:56 PM**  
Analyst: **Pion**  
Instrument ID: **T312060**

## Experiment Log (continued)

[1:00:10] Stirrer speed set to 0  
[1:00:48] Datapoint id 56 collected  
[1:00:48] Charge balance equation is out by -357.1%  
[1:00:48] Stirrer speed set to 55  
[1:00:53] pH 8.73 -> 8.93  
[1:00:53] Using cautious pH adjust  
[1:00:53] Dispensed 0.000024 mL of Base (0.5 M KOH)  
[1:00:59] Stepping pH = 8.73  
[1:00:59] Dispensed 0.000047 mL of Base (0.5 M KOH)  
[1:01:04] Stepping pH = 8.91  
[1:01:04] Dispensed 0.000024 mL of Base (0.5 M KOH)  
[1:01:09] Stepping pH = 8.99  
[1:01:24] Stirrer speed set to 0  
[1:01:53] Datapoint id 57 collected  
[1:01:53] Charge balance equation is out by -204.7%  
[1:01:53] Stirrer speed set to 55  
[1:01:59] pH 9.00 -> 9.20  
[1:01:59] Using cautious pH adjust  
[1:01:59] Dispensed 0.000024 mL of Base (0.5 M KOH)  
[1:02:04] Stepping pH = 8.99  
[1:02:04] Dispensed 0.000118 mL of Base (0.5 M KOH)  
[1:02:09] Stepping pH = 9.35  
[1:02:24] Stirrer speed set to 0  
[1:02:38] Datapoint id 58 collected  
[1:02:38] Charge balance equation is out by -205.9%  
[1:02:38] Stirrer speed set to 55  
[1:02:44] pH 9.36 -> 9.56  
[1:02:44] Using cautious pH adjust  
[1:02:44] Dispensed 0.000047 mL of Base (0.5 M KOH)  
[1:02:49] Stepping pH = 9.37  
[1:02:49] Dispensed 0.000118 mL of Base (0.5 M KOH)  
[1:02:54] Stepping pH = 9.58  
[1:03:09] Stirrer speed set to 0  
[1:03:25] Datapoint id 59 collected  
[1:03:25] Charge balance equation is out by -88.1%  
[1:03:25] Stirrer speed set to 55  
[1:03:30] pH 9.57 -> 9.77  
[1:03:30] Using cautious pH adjust  
[1:03:30] Dispensed 0.000071 mL of Base (0.5 M KOH)  
[1:03:35] Stepping pH = 9.61  
[1:03:35] Dispensed 0.000141 mL of Base (0.5 M KOH)  
[1:03:40] Stepping pH = 9.77  
[1:03:55] Stirrer speed set to 0  
[1:04:09] Datapoint id 60 collected  
[1:04:09] Charge balance equation is out by -44.9%  
[1:04:09] Stirrer speed set to 55  
[1:04:14] pH 9.77 -> 9.97  
[1:04:14] Using cautious pH adjust  
[1:04:14] Dispensed 0.000094 mL of Base (0.5 M KOH)  
[1:04:19] Stepping pH = 9.83  
[1:04:19] Dispensed 0.000141 mL of Base (0.5 M KOH)  
[1:04:24] Stepping pH = 9.93  
[1:04:24] Dispensed 0.000047 mL of Base (0.5 M KOH)  
[1:04:29] Stepping pH = 9.96  
[1:04:44] Stirrer speed set to 0  
[1:04:55] Datapoint id 61 collected  
[1:04:55] Charge balance equation is out by -40.3%  
[1:04:55] Stirrer speed set to 55  
[1:05:00] pH 9.95 -> 10.05

Sample name: **M07\_octanol**  
 Assay name: **pH-metric high logP**  
 Assay ID: **18B-28012**  
 Filename: **C:\Sirius\_T3\Mehtap\20180228\_exp28\_logP\_T3-2\18B-28012\_M07\_octanol\_pH-metric high logP.t3r**

Experiment start time: **2/28/2018 5:44:56 PM**  
 Analyst: **Pion**  
 Instrument ID: **T312060**

## Experiment Log (continued)

[1:05:00] Using cautious pH adjust  
 [1:05:00] Dispensed 0.000071 mL of Base (0.5 M KOH)  
 [1:05:05] Stepping pH = 9.98  
 [1:05:05] Dispensed 0.000094 mL of Base (0.5 M KOH)  
 [1:05:10] Stepping pH = 10.04  
 [1:05:25] Stirrer speed set to 0  
 [1:05:35] Datapoint id 62 collected  
 [1:05:35] Charge balance equation is out by -24.0%  
 [1:05:35] Titration 3 of 3  
 [1:05:35] Adding initial titrants  
 [1:05:35] Automatically add 0.25000 mL of Octanol  
 [1:05:41] Dispensed 0.250000 mL of Octanol  
 [1:05:41] Stirrer speed set to 10  
 [1:05:42] Stirrer speed set to 60  
 [1:05:42] Iterative adjust 10.05 -> 2.00  
 [1:05:42] pH 10.05 -> 2.00  
 [1:05:44] Dispensed 0.057714 mL of Acid (0.5 M HCl)  
 [1:05:49] pH 2.02 -> 2.00  
 [1:05:49] Dispensed 0.002587 mL of Acid (0.5 M HCl)  
 [1:06:39] Stirrer speed set to 0  
 [1:06:49] Datapoint id 63 collected  
 [1:06:49] Stirrer speed set to 60  
 [1:06:54] pH 1.96 -> 2.16  
 [1:06:54] Using cautious pH adjust  
 [1:06:55] Dispensed 0.010113 mL of Base (0.5 M KOH)  
 [1:07:00] Stepping pH = 2.05  
 [1:07:00] Dispensed 0.007620 mL of Base (0.5 M KOH)  
 [1:07:05] Stepping pH = 2.14  
 [1:07:05] Dispensed 0.001270 mL of Base (0.5 M KOH)  
 [1:07:10] Stepping pH = 2.16  
 [1:07:26] Stirrer speed set to 0  
 [1:07:36] Datapoint id 64 collected  
 [1:07:36] Charge balance equation is out by 6.0%  
 [1:07:36] Stirrer speed set to 60  
 [1:07:41] pH 2.17 -> 2.37  
 [1:07:41] Using charge balance adjust  
 [1:07:42] Dispensed 0.012512 mL of Base (0.5 M KOH)  
 [1:08:02] Stirrer speed set to 0  
 [1:08:12] Datapoint id 65 collected  
 [1:08:12] Charge balance equation is out by 7.3%  
 [1:08:12] Stirrer speed set to 60  
 [1:08:17] pH 2.39 -> 2.59  
 [1:08:17] Using charge balance adjust  
 [1:08:17] Dispensed 0.007620 mL of Base (0.5 M KOH)  
 [1:08:37] Stirrer speed set to 0  
 [1:08:47] Datapoint id 66 collected  
 [1:08:47] Charge balance equation is out by 11.9%  
 [1:08:47] Stirrer speed set to 60  
 [1:08:52] pH 2.62 -> 2.82  
 [1:08:52] Using charge balance adjust  
 [1:08:53] Dispensed 0.004704 mL of Base (0.5 M KOH)  
 [1:09:13] Stirrer speed set to 0  
 [1:09:23] Datapoint id 67 collected  
 [1:09:23] Charge balance equation is out by -2.4%  
 [1:09:23] Stirrer speed set to 60  
 [1:09:29] pH 2.82 -> 3.02  
 [1:09:29] Using charge balance adjust  
 [1:09:29] Dispensed 0.003269 mL of Base (0.5 M KOH)  
 [1:09:49] Stirrer speed set to 0



Sample name: **M07\_octanol**  
Assay name: **pH-metric high logP**  
Assay ID: **18B-28012**  
Filename: **C:\Sirius\_T3\Mehtap\20180228\_exp28\_logP\_T3-2\18B-28012\_M07\_octanol\_pH-metric high logP.t3r**

Experiment start time: **2/28/2018 5:44:56 PM**  
Analyst: **Pion**  
Instrument ID: **T312060**

## Experiment Log (continued)

[1:09:59] Datapoint id 68 collected  
[1:09:59] Charge balance equation is out by 6.0%  
[1:09:59] Stirrer speed set to 60  
[1:10:04] pH 3.04 -> 3.24  
[1:10:04] Using charge balance adjust  
[1:10:04] Dispensed 0.002399 mL of Base (0.5 M KOH)  
[1:10:24] Stirrer speed set to 0  
[1:10:34] Datapoint id 69 collected  
[1:10:34] Charge balance equation is out by 13.8%  
[1:10:34] Stirrer speed set to 60  
[1:10:40] pH 3.27 -> 3.47  
[1:10:40] Using charge balance adjust  
[1:10:40] Dispensed 0.001929 mL of Base (0.5 M KOH)  
[1:11:00] Stirrer speed set to 0  
[1:11:10] Datapoint id 70 collected  
[1:11:10] Charge balance equation is out by 10.7%  
[1:11:10] Stirrer speed set to 60  
[1:11:15] pH 3.50 -> 3.70  
[1:11:15] Using charge balance adjust  
[1:11:15] Dispensed 0.001670 mL of Base (0.5 M KOH)  
[1:11:35] Stirrer speed set to 0  
[1:11:46] Datapoint id 71 collected  
[1:11:46] Charge balance equation is out by 1.9%  
[1:11:46] Stirrer speed set to 60  
[1:11:51] pH 3.71 -> 3.91  
[1:11:51] Using charge balance adjust  
[1:11:51] Dispensed 0.001435 mL of Base (0.5 M KOH)  
[1:12:11] Stirrer speed set to 0  
[1:12:22] Datapoint id 72 collected  
[1:12:22] Charge balance equation is out by -6.8%  
[1:12:22] Stirrer speed set to 60  
[1:12:27] pH 3.91 -> 4.11  
[1:12:27] Using charge balance adjust  
[1:12:27] Dispensed 0.001223 mL of Base (0.5 M KOH)  
[1:12:47] Stirrer speed set to 0  
[1:12:57] Datapoint id 73 collected  
[1:12:57] Charge balance equation is out by 8.5%  
[1:12:57] Stirrer speed set to 60  
[1:13:02] pH 4.13 -> 4.33  
[1:13:02] Using charge balance adjust  
[1:13:03] Dispensed 0.000917 mL of Base (0.5 M KOH)  
[1:13:23] Stirrer speed set to 0  
[1:13:33] Datapoint id 74 collected  
[1:13:33] Charge balance equation is out by 8.2%  
[1:13:33] Stirrer speed set to 60  
[1:13:38] pH 4.36 -> 4.56  
[1:13:38] Using charge balance adjust  
[1:13:38] Dispensed 0.000659 mL of Base (0.5 M KOH)  
[1:13:58] Stirrer speed set to 0  
[1:14:09] Datapoint id 75 collected  
[1:14:09] Charge balance equation is out by 14.5%  
[1:14:09] Stirrer speed set to 60  
[1:14:14] pH 4.60 -> 4.80  
[1:14:14] Using charge balance adjust  
[1:14:14] Dispensed 0.000423 mL of Base (0.5 M KOH)  
[1:14:35] Stirrer speed set to 0  
[1:14:46] Datapoint id 76 collected  
[1:14:46] Charge balance equation is out by 1.5%  
[1:14:46] Stirrer speed set to 60

Sample name: **M07\_octanol**  
Assay name: **pH-metric high logP**  
Assay ID: **18B-28012**  
Filename: **C:\Sirius\_T3\Mehtap\20180228\_exp28\_logP\_T3-2\18B-28012\_M07\_octanol\_pH-metric high logP.t3r**

Experiment start time: **2/28/2018 5:44:56 PM**  
Analyst: **Pion**  
Instrument ID: **T312060**

## Experiment Log (continued)

[1:14:51] pH 4.82 -> 5.02  
[1:14:51] Using charge balance adjust  
[1:14:51] Dispensed 0.000282 mL of Base (0.5 M KOH)  
[1:15:11] Stirrer speed set to 0  
[1:15:22] Datapoint id 77 collected  
[1:15:22] Charge balance equation is out by 6.9%  
[1:15:22] Stirrer speed set to 60  
[1:15:27] pH 5.04 -> 5.24  
[1:15:27] Using charge balance adjust  
[1:15:27] Dispensed 0.000165 mL of Base (0.5 M KOH)  
[1:15:47] Stirrer speed set to 0  
[1:15:59] Datapoint id 78 collected  
[1:15:59] Charge balance equation is out by -32.4%  
[1:15:59] Stirrer speed set to 60  
[1:16:04] pH 5.20 -> 5.40  
[1:16:04] Using cautious pH adjust  
[1:16:04] Dispensed 0.000071 mL of Base (0.5 M KOH)  
[1:16:09] Stepping pH = 5.23  
[1:16:09] Dispensed 0.000118 mL of Base (0.5 M KOH)  
[1:16:14] Stepping pH = 5.46  
[1:16:29] Stirrer speed set to 0  
[1:16:41] Datapoint id 79 collected  
[1:16:41] Charge balance equation is out by -41.0%  
[1:16:41] Stirrer speed set to 60  
[1:16:46] pH 5.50 -> 5.70  
[1:16:46] Using cautious pH adjust  
[1:16:46] Dispensed 0.000047 mL of Base (0.5 M KOH)  
[1:16:51] Stepping pH = 5.54  
[1:16:51] Dispensed 0.000071 mL of Base (0.5 M KOH)  
[1:16:56] Stepping pH = 5.75  
[1:17:11] Stirrer speed set to 0  
[1:17:35] Datapoint id 80 collected  
[1:17:35] Charge balance equation is out by -44.5%  
[1:17:35] Stirrer speed set to 60  
[1:17:40] pH 5.82 -> 6.02  
[1:17:40] Using cautious pH adjust  
[1:17:40] Dispensed 0.000024 mL of Base (0.5 M KOH)  
[1:17:45] Stepping pH = 5.83  
[1:17:45] Dispensed 0.000094 mL of Base (0.5 M KOH)  
[1:17:50] Stepping pH = 6.40  
[1:18:05] Stirrer speed set to 0  
[1:19:05] Datapoint id 81 collected  
[1:19:05] Charge balance equation is out by -88.8%  
[1:19:05] Stirrer speed set to 60  
[1:19:10] pH 6.36 -> 6.56  
[1:19:10] Using cautious pH adjust  
[1:19:10] Dispensed 0.000024 mL of Base (0.5 M KOH)  
[1:19:15] Stepping pH = 6.40  
[1:19:15] Dispensed 0.000047 mL of Base (0.5 M KOH)  
[1:19:20] Stepping pH = 6.66  
[1:19:35] Stirrer speed set to 0  
[1:20:35] Datapoint id 82 collected  
[1:20:35] Charge balance equation is out by -45.8%  
[1:20:35] Stirrer speed set to 60  
[1:20:40] pH 6.67 -> 6.87  
[1:20:40] Using cautious pH adjust  
[1:20:40] Dispensed 0.000024 mL of Base (0.5 M KOH)  
[1:20:45] Stepping pH = 6.70  
[1:20:45] Dispensed 0.000047 mL of Base (0.5 M KOH)



Sample name: **M07\_octanol**  
Assay name: **pH-metric high logP**  
Assay ID: **18B-28012**  
Filename: **C:\Sirius\_T3\Mehtap\20180228\_exp28\_logP\_T3-2\18B-28012\_M07\_octanol\_pH-metric high logP.t3r**

Experiment start time: **2/28/2018 5:44:56 PM**  
Analyst: **Pion**  
Instrument ID: **T312060**

## Experiment Log (continued)

[1:20:51] Stepping pH = 7.15  
[1:21:06] Stirrer speed set to 0  
[1:22:06] Datapoint id 83 collected  
[1:22:06] Charge balance equation is out by -73.9%  
[1:22:06] Stirrer speed set to 60  
[1:22:11] pH 7.13 -> 7.33  
[1:22:11] Using cautious pH adjust  
[1:22:11] Dispensed 0.000024 mL of Base (0.5 M KOH)  
[1:22:16] Stepping pH = 7.19  
[1:22:16] Dispensed 0.000024 mL of Base (0.5 M KOH)  
[1:22:21] Stepping pH = 7.37  
[1:22:36] Stirrer speed set to 0  
[1:23:36] Datapoint id 84 collected  
[1:23:36] Charge balance equation is out by -87.9%  
[1:23:36] Stirrer speed set to 60  
[1:23:41] pH 7.36 -> 7.56  
[1:23:41] Using cautious pH adjust  
[1:23:41] Dispensed 0.000024 mL of Base (0.5 M KOH)  
[1:23:46] Stepping pH = 7.41  
[1:23:46] Dispensed 0.000024 mL of Base (0.5 M KOH)  
[1:23:52] Stepping pH = 7.71  
[1:24:07] Stirrer speed set to 0  
[1:25:07] Datapoint id 85 collected  
[1:25:07] Charge balance equation is out by -173.4%  
[1:25:07] Stirrer speed set to 60  
[1:25:12] pH 7.90 -> 8.10  
[1:25:12] Using cautious pH adjust  
[1:25:12] Dispensed 0.000024 mL of Base (0.5 M KOH)  
[1:25:17] Stepping pH = 7.97  
[1:25:17] Dispensed 0.000024 mL of Base (0.5 M KOH)  
[1:25:22] Stepping pH = 8.16  
[1:25:37] Stirrer speed set to 0  
[1:26:37] Datapoint id 86 collected  
[1:26:37] Charge balance equation is out by -375.0%  
[1:26:37] Stirrer speed set to 60  
[1:26:42] pH 8.13 -> 8.33  
[1:26:42] Using cautious pH adjust  
[1:26:42] Dispensed 0.000024 mL of Base (0.5 M KOH)  
[1:26:47] Stepping pH = 8.15  
[1:26:47] Dispensed 0.000024 mL of Base (0.5 M KOH)  
[1:26:53] Stepping pH = 8.23  
[1:26:53] Dispensed 0.000024 mL of Base (0.5 M KOH)  
[1:26:58] Stepping pH = 8.34  
[1:27:13] Stirrer speed set to 0  
[1:28:13] Datapoint id 87 collected  
[1:28:13] Charge balance equation is out by -530.1%  
[1:28:13] Stirrer speed set to 60  
[1:28:18] pH 8.40 -> 8.60  
[1:28:18] Using cautious pH adjust  
[1:28:18] Dispensed 0.000024 mL of Base (0.5 M KOH)  
[1:28:23] Stepping pH = 8.46  
[1:28:23] Dispensed 0.000024 mL of Base (0.5 M KOH)  
[1:28:28] Stepping pH = 8.56  
[1:28:28] Dispensed 0.000024 mL of Base (0.5 M KOH)  
[1:28:33] Stepping pH = 8.61  
[1:28:48] Stirrer speed set to 0  
[1:29:10] Datapoint id 88 collected  
[1:29:10] Charge balance equation is out by -322.0%  
[1:29:10] Stirrer speed set to 60

Sample name: **M07\_octanol**  
Assay name: **pH-metric high logP**  
Assay ID: **18B-28012**  
Filename: **C:\Sirius\_T3\Mehtap\20180228\_exp28\_logP\_T3-2\18B-28012\_M07\_octanol\_pH-metric high logP.t3r**

Experiment start time: **2/28/2018 5:44:56 PM**  
Analyst: **Pion**  
Instrument ID: **T312060**

## Experiment Log (continued)

[1:29:16] pH 8.63 -> 8.83  
[1:29:16] Using cautious pH adjust  
[1:29:16] Dispensed 0.000024 mL of Base (0.5 M KOH)  
[1:29:21] Stepping pH = 8.66  
[1:29:21] Dispensed 0.000024 mL of Base (0.5 M KOH)  
[1:29:26] Stepping pH = 8.73  
[1:29:26] Dispensed 0.000024 mL of Base (0.5 M KOH)  
[1:29:31] Stepping pH = 8.80  
[1:29:31] Dispensed 0.000024 mL of Base (0.5 M KOH)  
[1:29:36] Stepping pH = 8.89  
[1:29:51] Stirrer speed set to 0  
[1:30:18] Datapoint id 89 collected  
[1:30:18] Charge balance equation is out by -324.1%  
[1:30:18] Stirrer speed set to 60  
[1:30:23] pH 8.89 -> 9.09  
[1:30:23] Using cautious pH adjust  
[1:30:23] Dispensed 0.000024 mL of Base (0.5 M KOH)  
[1:30:28] Stepping pH = 8.90  
[1:30:29] Dispensed 0.000047 mL of Base (0.5 M KOH)  
[1:30:34] Stepping pH = 9.01  
[1:30:34] Dispensed 0.000024 mL of Base (0.5 M KOH)  
[1:30:39] Stepping pH = 9.04  
[1:30:39] Dispensed 0.000024 mL of Base (0.5 M KOH)  
[1:30:44] Stepping pH = 9.09  
[1:30:59] Stirrer speed set to 0  
[1:31:14] Datapoint id 90 collected  
[1:31:14] Charge balance equation is out by -257.9%  
[1:31:14] Stirrer speed set to 60  
[1:31:19] pH 9.11 -> 9.31  
[1:31:19] Using cautious pH adjust  
[1:31:19] Dispensed 0.000024 mL of Base (0.5 M KOH)  
[1:31:24] Stepping pH = 9.12  
[1:31:24] Dispensed 0.000094 mL of Base (0.5 M KOH)  
[1:31:29] Stepping pH = 9.30  
[1:31:29] Dispensed 0.000024 mL of Base (0.5 M KOH)  
[1:31:34] Stepping pH = 9.32  
[1:31:49] Stirrer speed set to 0  
[1:32:01] Datapoint id 91 collected  
[1:32:01] Charge balance equation is out by -124.8%  
[1:32:01] Stirrer speed set to 60  
[1:32:06] pH 9.31 -> 9.51  
[1:32:06] Using cautious pH adjust  
[1:32:06] Dispensed 0.000047 mL of Base (0.5 M KOH)  
[1:32:11] Stepping pH = 9.35  
[1:32:11] Dispensed 0.000094 mL of Base (0.5 M KOH)  
[1:32:16] Stepping pH = 9.49  
[1:32:16] Dispensed 0.000024 mL of Base (0.5 M KOH)  
[1:32:21] Stepping pH = 9.50  
[1:32:21] Dispensed 0.000024 mL of Base (0.5 M KOH)  
[1:32:26] Stepping pH = 9.52  
[1:32:41] Stirrer speed set to 0  
[1:32:57] Datapoint id 92 collected  
[1:32:57] Charge balance equation is out by -93.9%  
[1:32:57] Stirrer speed set to 60  
[1:33:02] pH 9.50 -> 9.70  
[1:33:02] Using cautious pH adjust  
[1:33:02] Dispensed 0.000071 mL of Base (0.5 M KOH)  
[1:33:07] Stepping pH = 9.58  
[1:33:07] Dispensed 0.000071 mL of Base (0.5 M KOH)

Sample name: **M07\_octanol**  
Assay name: **pH-metric high logP**  
Assay ID: **18B-28012**  
Filename: **C:\Sirius\_T3\Mehtap\20180228\_exp28\_logP\_T3-2\18B-28012\_M07\_octanol\_pH-metric high logP.t3r**

Experiment start time: **2/28/2018 5:44:56 PM**  
Analyst: **Pion**  
Instrument ID: **T312060**

## Experiment Log (continued)

[1:33:12] Stepping pH = 9.65  
[1:33:12] Dispensed 0.000047 mL of Base (0.5 M KOH)  
[1:33:17] Stepping pH = 9.68  
[1:33:17] Dispensed 0.000024 mL of Base (0.5 M KOH)  
[1:33:22] Stepping pH = 9.70  
[1:33:37] Stirrer speed set to 0  
[1:33:48] Datapoint id 93 collected  
[1:33:48] Charge balance equation is out by -50.3%  
[1:33:48] Stirrer speed set to 60  
[1:33:53] pH 9.69 -> 9.89  
[1:33:53] Using cautious pH adjust  
[1:33:53] Dispensed 0.000094 mL of Base (0.5 M KOH)  
[1:33:58] Stepping pH = 9.76  
[1:33:58] Dispensed 0.000118 mL of Base (0.5 M KOH)  
[1:34:03] Stepping pH = 9.85  
[1:34:03] Dispensed 0.000047 mL of Base (0.5 M KOH)  
[1:34:08] Stepping pH = 9.87  
[1:34:08] Dispensed 0.000024 mL of Base (0.5 M KOH)  
[1:34:14] Stepping pH = 9.89  
[1:34:29] Stirrer speed set to 0  
[1:34:40] Datapoint id 94 collected  
[1:34:40] Charge balance equation is out by -41.2%  
[1:34:40] Stirrer speed set to 60  
[1:34:45] pH 9.89 -> 10.05  
[1:34:45] Using cautious pH adjust  
[1:34:45] Dispensed 0.000094 mL of Base (0.5 M KOH)  
[1:34:50] Stepping pH = 9.94  
[1:34:51] Dispensed 0.000118 mL of Base (0.5 M KOH)  
[1:34:56] Stepping pH = 10.02  
[1:35:11] Stirrer speed set to 0  
[1:35:21] Datapoint id 95 collected  
[1:35:21] Charge balance equation is out by -9.4%  
[1:35:21] Argon flow rate set to 0  
[1:35:25] Titrator arm moved over Titration position
