# Supplementary material for: Octanol-water partition coefficient measurements for the SAMPL6 Blind Prediction Challenge
Source: bioRxiv or medRxiv preprint supplement (doi:10.1101/757393), 2019-12-02
Supplement: Supplementary file [file media-2.zip]

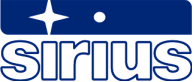

Sample name: **M04\_octanol** Experiment start time: **3/24/2018 4:11:23 AM**  
Assay name: **pH-metric high logP** Analyst: **Dorothy Levorse**  
Assay ID: **18C-24004** Instrument ID: **T312060**  
Filename: **C:\Sirius\_T3\Mehtap\20180323\_exp33\_logP\_T3-2\18C-24004\_M04\_octanol\_pH-metric high logP.t3r**

**pH-metric Result**

logP (XH +) 0.77 ±0.03 (n=50)  
logP (neutral X) 3.95 ±0.02 (n=50)  
RMSD 0.422

**18C-24004 Points 1 to 23**

M04\_octanol concentration factor 0.620  
Carbonate 0.0570 mM  
Acidity error 0.07992 mM

**18C-24004 Points 24 to 50**

M04\_octanol concentration factor 0.641  
Carbonate 0.1306 mM  
Acidity error -0.26645 mM

**18C-24004 Points 51 to 77**

M04\_octanol concentration factor 0.822  
Carbonate 0.1176 mM  
Acidity error -0.01548 mM

**Warnings and errors**

Errors None  
Warnings None

**Sample logD and percent species**

| pH     | M04_octanol<br>logD | M04_octanol<br>M04_octanolH | M04_octanol<br>M04_octanol | M04_octanol<br>M04_octanolH* | M04_octanol<br>M04_octanol* | Comment    |
|--------|---------------------|-----------------------------|----------------------------|------------------------------|-----------------------------|------------|
| 1.000  | 0.78                | 14.18 %                     | 0.00 %                     | 84.45 %                      | 1.37 %                      | Stomach pH |
| 1.200  | 0.79                | 14.07 %                     | 0.00 %                     | 83.78 %                      | 2.15 %                      |            |
| 2.000  | 0.84                | 12.63 %                     | 0.00 %                     | 75.19 %                      | 12.18 %                     |            |
| 3.000  | 1.19                | 6.03 %                      | 0.01 %                     | 35.87 %                      | 58.10 %                     |            |
| 4.000  | 2.01                | 0.97 %                      | 0.01 %                     | 5.76 %                       | 93.26 %                     |            |
| 5.000  | 2.94                | 0.10 %                      | 0.01 %                     | 0.61 %                       | 99.27 %                     | Blood pH   |
| 6.000  | 3.67                | 0.01 %                      | 0.01 %                     | 0.06 %                       | 99.92 %                     |            |
| 6.500  | 3.84                | 0.00 %                      | 0.01 %                     | 0.02 %                       | 99.97 %                     |            |
| 7.000  | 3.92                | 0.00 %                      | 0.01 %                     | 0.01 %                       | 99.98 %                     |            |
| 7.400  | 3.94                | 0.00 %                      | 0.01 %                     | 0.00 %                       | 99.99 %                     |            |
| 8.000  | 3.95                | 0.00 %                      | 0.01 %                     | 0.00 %                       | 99.99 %                     |            |
| 9.000  | 3.95                | 0.00 %                      | 0.01 %                     | 0.00 %                       | 99.99 %                     |            |
| 10.000 | 3.95                | 0.00 %                      | 0.01 %                     | 0.00 %                       | 99.99 %                     |            |
| 11.000 | 3.95                | 0.00 %                      | 0.01 %                     | 0.00 %                       | 99.99 %                     |            |
| 12.000 | 3.95                | 0.00 %                      | 0.01 %                     | 0.00 %                       | 99.99 %                     |            |

Sample name: **M04\_octanol**  
 Assay name: **pH-metric high logP**  
 Assay ID: **18C-24004**  
 Filename: **C:\Sirius\_T3\Mehtap\20180323\_exp33\_logP\_T3-2\18C-24004\_M04\_octanol\_pH-metric high logP.t3r**

Experiment start time: **3/24/2018 4:11:23 AM**  
 Analyst: **Dorothy Levorse**  
 Instrument ID: **T312060**

## Graphs

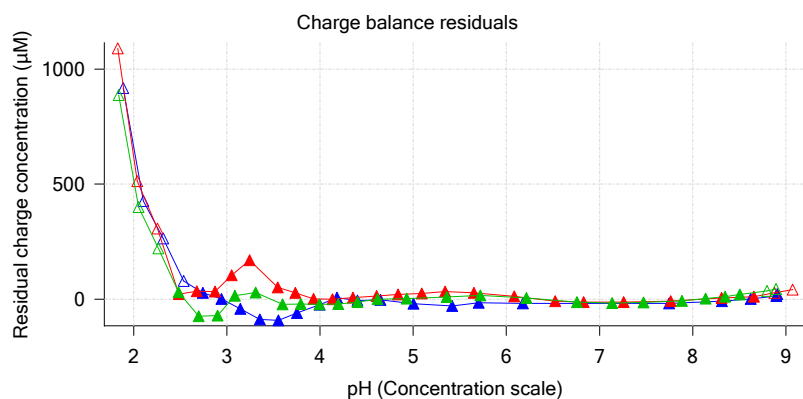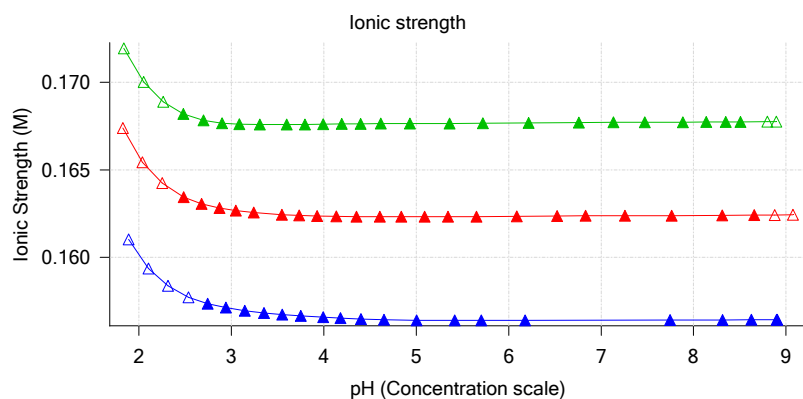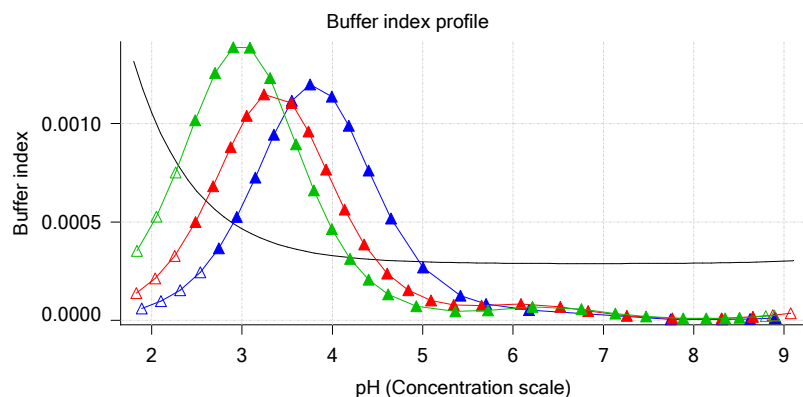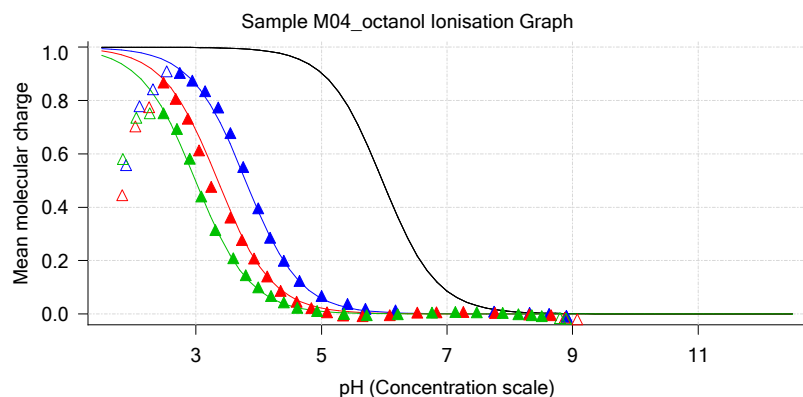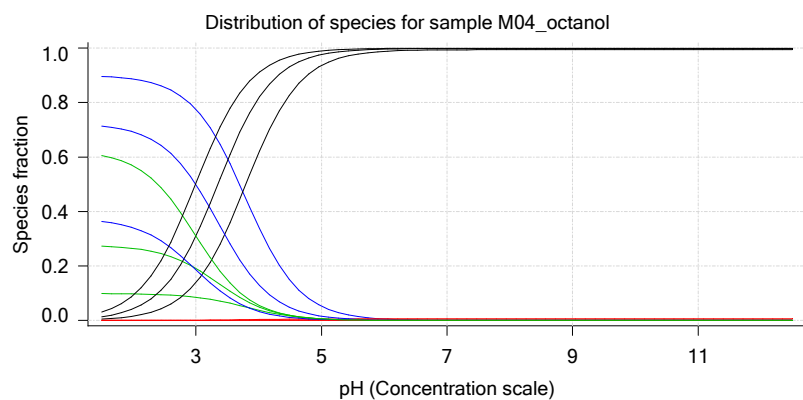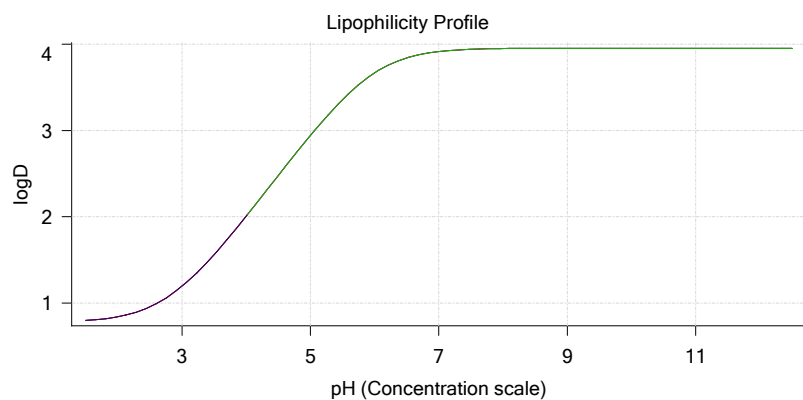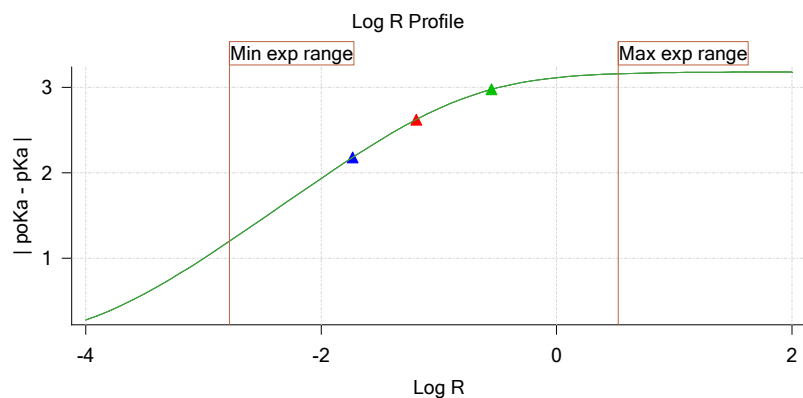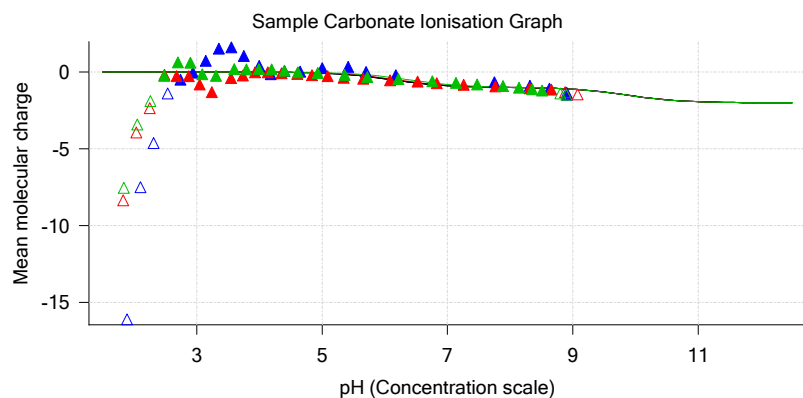

Sample name: **M04\_octanol**  
 Assay name: **pH-metric high logP**  
 Assay ID: **18C-24004**  
 Filename: **C:\Sirius\_T3\Mehtap\20180323\_exp33\_logP\_T3-2\18C-24004\_M04\_octanol\_pH-metric high logP.t3r**

Experiment start time: **3/24/2018 4:11:23 AM**  
 Analyst: **Dorothy Levorse**  
 Instrument ID: **T312060**

## Graphs (continued)

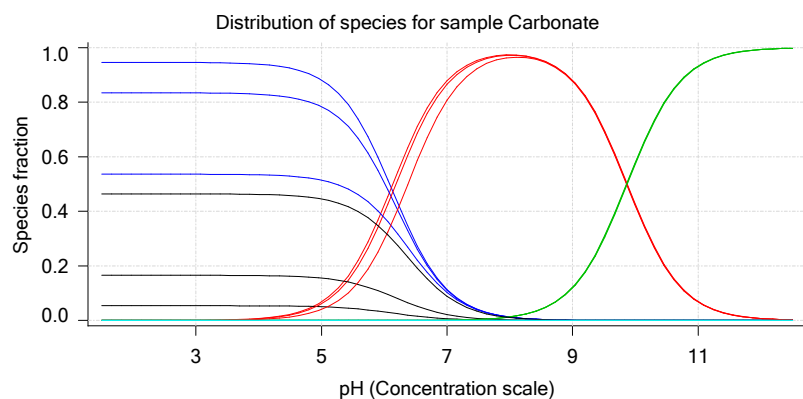

Sample name: **M04\_octanol**  
 Assay name: **pH-metric high logP**  
 Assay ID: **18C-24004**  
 Filename: **C:\Sirius\_T3\Mehtap\20180323\_exp33\_logP\_T3-2\18C-24004\_M04\_octanol\_pH-metric high logP.t3r**

Experiment start time: **3/24/2018 4:11:23 AM**  
 Analyst: **Dorothy Levorse**  
 Instrument ID: **T312060**

## pH-metric high logP Titration 1 of 3 18C-24004 Points 1 to 23

### Overall results

RMSD 0.635  
 Average ionic strength 0.157 M  
 Average temperature 24.9°C  
 Partition ratio 0.0185 : 1  
 Analyte concentration range 3292.8 µM to 3384.5 µM  
 Total points considered 19 of 23

### Warnings and errors

Errors None  
 Warnings Sample concentration factor out of range

### Four-Plus parameters

Alpha 0.119 3/24/2018 4:11:23 AM C:\Sirius\_T3\HCl18C23.t3r  
 S 0.9972 3/24/2018 4:11:23 AM C:\Sirius\_T3\HCl18C23.t3r  
 jH 0.9 3/24/2018 4:11:23 AM C:\Sirius\_T3\HCl18C23.t3r  
 jOH -0.3 3/24/2018 4:11:23 AM C:\Sirius\_T3\HCl18C23.t3r

### Titrants

0.50 M HCl 0.997124 3/24/2018 4:11:23 AM C:\Sirius\_T3\HCl18C23.t3r  
 0.50 M KOH 1.003190 3/24/2018 4:11:23 AM C:\Sirius\_T3\KOH18C23.t3r

### Sample

M04\_octanol concentration factor 0.620  
 Base pKa 1 5.97  
 logP (XH +) 0.19  
 logP (neutral X) 3.88

### Sample graphs

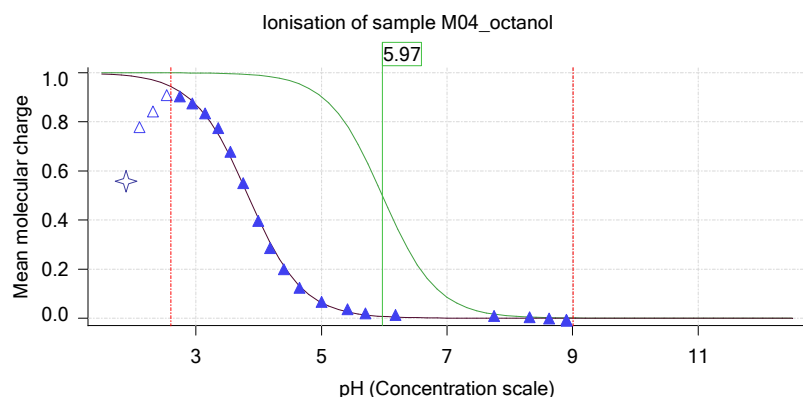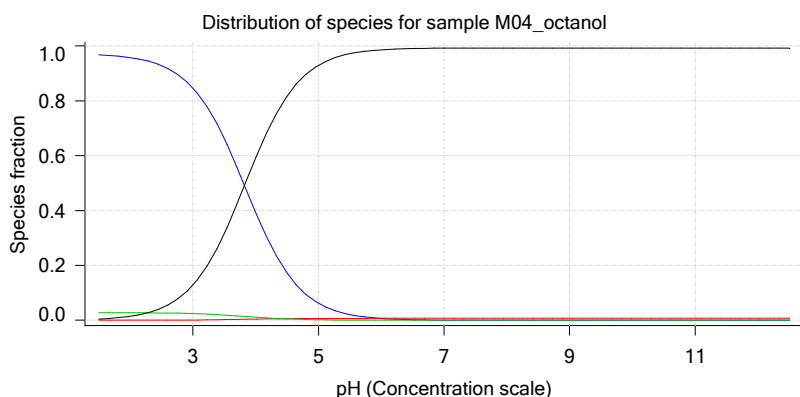

Sample name: **M04\_octanol**  
 Assay name: **pH-metric high logP**  
 Assay ID: **18C-24004**  
 Filename: **C:\Sirius\_T3\Mehtap\20180323\_exp33\_logP\_T3-2\18C-24004\_M04\_octanol\_pH-metric high logP.t3r**

Experiment start time: **3/24/2018 4:11:23 AM**  
 Analyst: **Dorothy Levorse**  
 Instrument ID: **T312060**

## Sample graphs (continued)

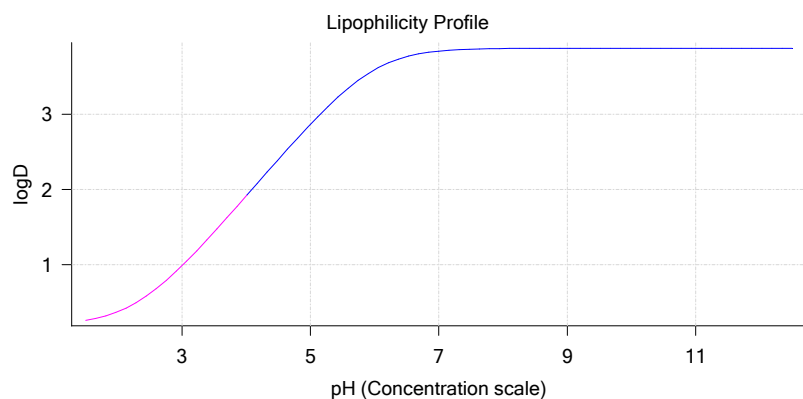

## Sample logD and percent species

| pH     | M04_octanol<br>logD | M04_octanol<br>M04_octanolH | M04_octanol<br>M04_octanolH | M04_octanol<br>M04_octanolH* | M04_octanol<br>M04_octanol* | Comment |
|--------|---------------------|-----------------------------|-----------------------------|------------------------------|-----------------------------|---------|
| 1.000  | 0.21                | 97.07 %                     | 0.00 %                      | 2.78 %                       | 0.15 %                      |         |
| 1.200  | 0.22                | 96.99 %                     | 0.00 %                      | 2.78 %                       | 0.23 %                      |         |
| 2.000  | 0.37                | 95.80 %                     | 0.01 %                      | 2.74 %                       | 1.44 %                      |         |
| 3.000  | 0.99                | 84.72 %                     | 0.09 %                      | 2.43 %                       | 12.76 %                     |         |
| 4.000  | 1.91                | 39.28 %                     | 0.42 %                      | 1.13 %                       | 59.18 %                     |         |
| 5.000  | 2.87                | 6.17 %                      | 0.66 %                      | 0.18 %                       | 92.99 %                     |         |
| 6.000  | 3.59                | 0.65 %                      | 0.70 %                      | 0.02 %                       | 98.63 %                     |         |
| 6.500  | 3.77                | 0.21 %                      | 0.70 %                      | 0.01 %                       | 99.08 %                     |         |
| 7.000  | 3.84                | 0.07 %                      | 0.71 %                      | 0.00 %                       | 99.23 %                     |         |
| 7.400  | 3.87                | 0.03 %                      | 0.71 %                      | 0.00 %                       | 99.27 %                     |         |
| 8.000  | 3.88                | 0.01 %                      | 0.71 %                      | 0.00 %                       | 99.29 %                     |         |
| 9.000  | 3.88                | 0.00 %                      | 0.71 %                      | 0.00 %                       | 99.29 %                     |         |
| 10.000 | 3.88                | 0.00 %                      | 0.71 %                      | 0.00 %                       | 99.29 %                     |         |
| 11.000 | 3.88                | 0.00 %                      | 0.71 %                      | 0.00 %                       | 99.29 %                     |         |
| 12.000 | 3.88                | 0.00 %                      | 0.71 %                      | 0.00 %                       | 99.29 %                     |         |

## Carbonate and acidity

 Carbonate 0.057 mM  
 Acidity error 0.080 mM

## Other graphs

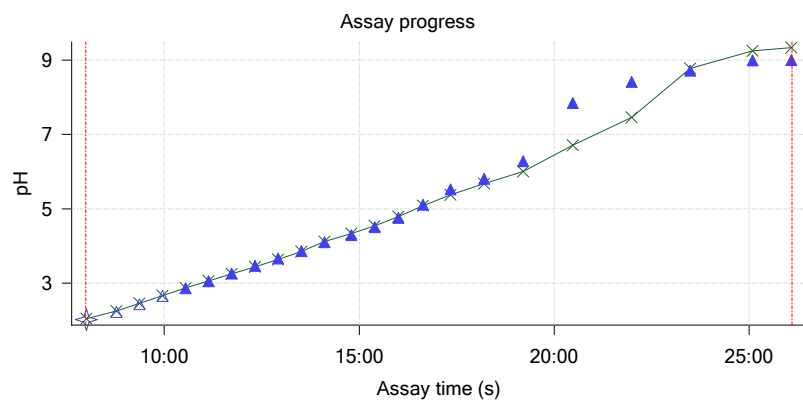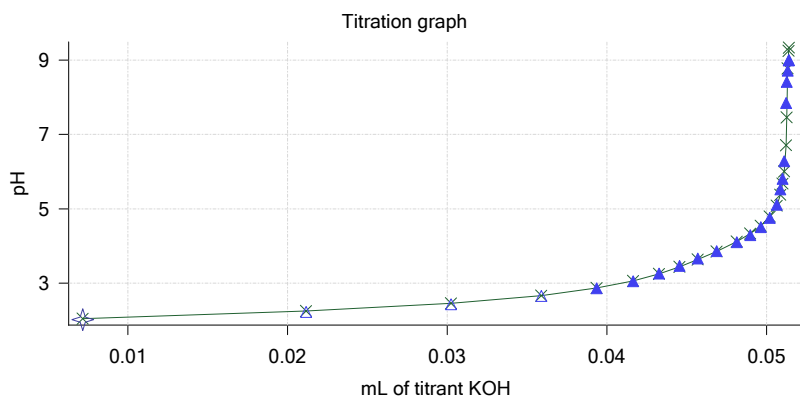

Sample name: **M04\_octanol**  
 Assay name: **pH-metric high logP**  
 Assay ID: **18C-24004**  
 Filename: **C:\Sirius\_T3\Mehtap\20180323\_exp33\_logP\_T3-2\18C-24004\_M04\_octanol\_pH-metric high logP.t3r**

Experiment start time: **3/24/2018 4:11:23 AM**  
 Analyst: **Dorothy Levorse**  
 Instrument ID: **T312060**

## Other graphs (continued)

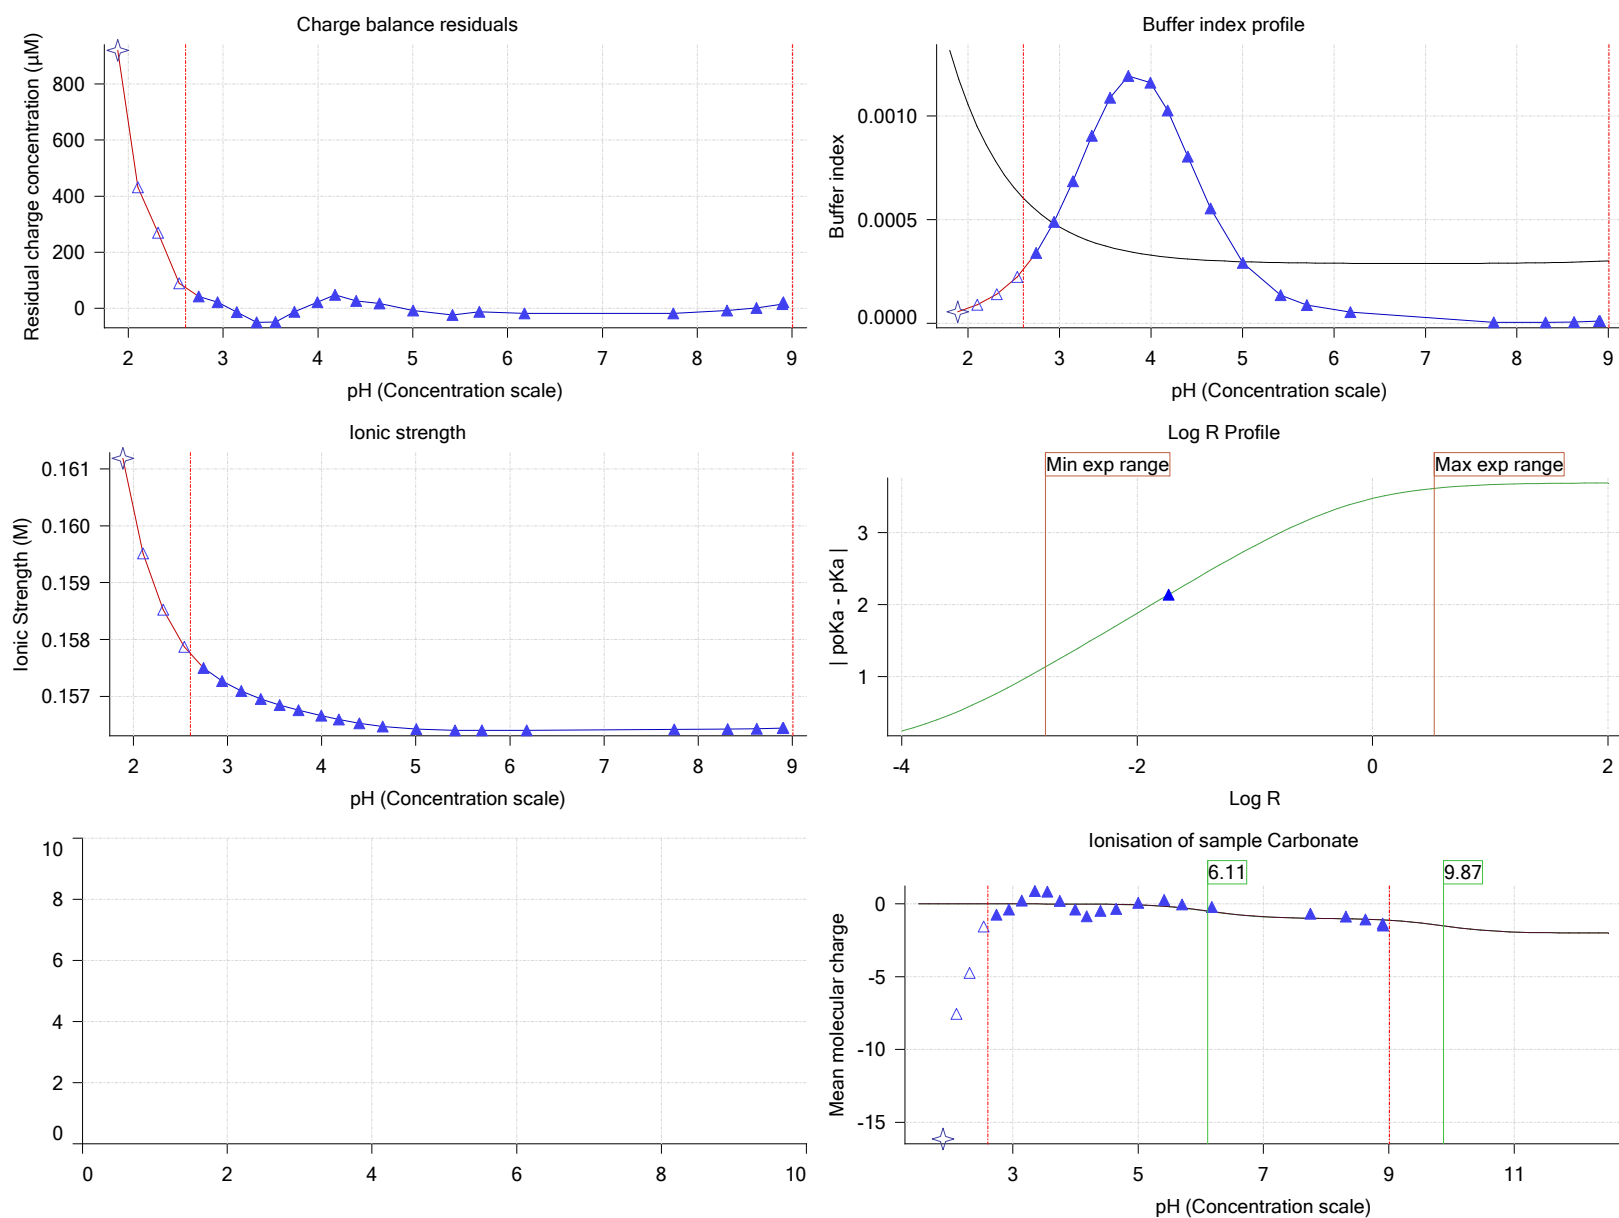

Sample name: **M04\_octanol**  
 Assay name: **pH-metric high logP**  
 Assay ID: **18C-24004**  
 Filename: **C:\Sirius\_T3\Mehtap\20180323\_exp33\_logP\_T3-2\18C-24004\_M04\_octanol\_pH-metric high logP.t3r**

Experiment start time: **3/24/2018 4:11:23 AM**  
 Analyst: **Dorothy Levorse**  
 Instrument ID: **T312060**

## pH-metric high logP Titration 2 of 3 18C-24004 Points 24 to 50

### Overall results

RMSD 0.240  
 Average ionic strength 0.163 M  
 Average temperature 25.0°C  
 Partition ratio 0.0642 : 1  
 Analyte concentration range 2954.9 µM to 3043.2 µM  
 Total points considered 22 of 27

### Warnings and errors

Errors None  
 Warnings Sample concentration factor out of range

### Four-Plus parameters

|                                                                                |       |        |                      |                           |
|--------------------------------------------------------------------------------|-------|--------|----------------------|---------------------------|
|  | Alpha | 0.119  | 3/24/2018 4:11:23 AM | C:\Sirius_T3\HCl18C23.t3r |
|  | S     | 0.9972 | 3/24/2018 4:11:23 AM | C:\Sirius_T3\HCl18C23.t3r |
|  | jH    | 0.9    | 3/24/2018 4:11:23 AM | C:\Sirius_T3\HCl18C23.t3r |
|  | jOH   | -0.3   | 3/24/2018 4:11:23 AM | C:\Sirius_T3\HCl18C23.t3r |

### Titrants

|                                                                                 |            |          |                      |                           |
|---------------------------------------------------------------------------------|------------|----------|----------------------|---------------------------|
|   | 0.50 M HCl | 0.997124 | 3/24/2018 4:11:23 AM | C:\Sirius_T3\HCl18C23.t3r |
|  | 0.50 M KOH | 1.003190 | 3/24/2018 4:11:23 AM | C:\Sirius_T3\KOH18C23.t3r |

### Sample

|                                                                                  |                                  |       |
|----------------------------------------------------------------------------------|----------------------------------|-------|
|  | M04_octanol concentration factor | 0.641 |
|  | Base pKa 1                       | 5.97  |
|  | logP (XH +)                      | 0.19  |
|  | logP (neutral X)                 | 3.92  |

### Sample graphs

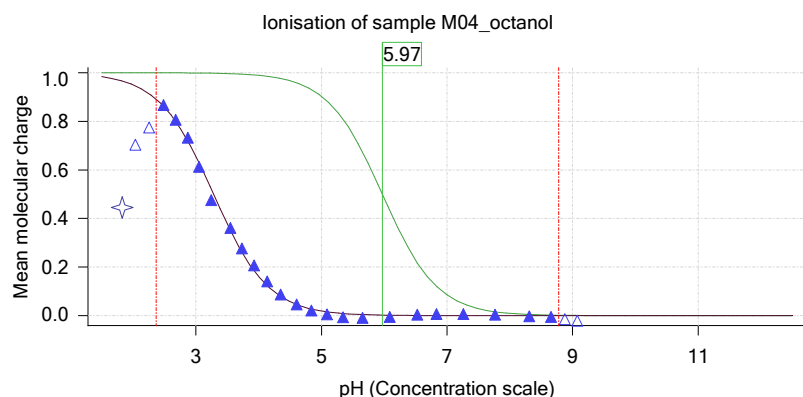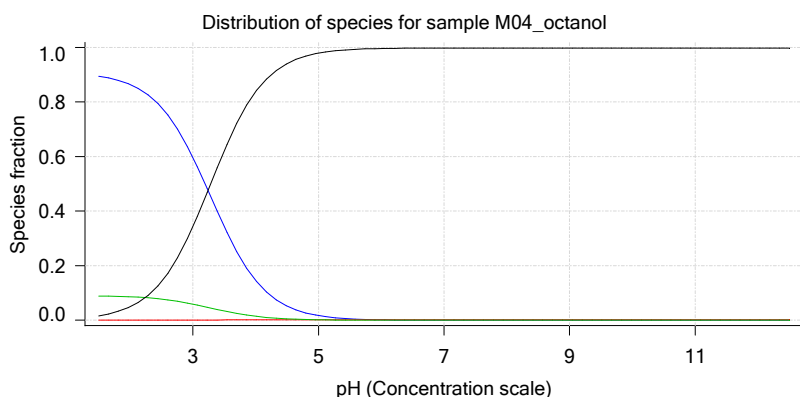

Sample name: **M04\_octanol**  
 Assay name: **pH-metric high logP**  
 Assay ID: **18C-24004**  
 Filename: **C:\Sirius\_T3\Mehtap\20180323\_exp33\_logP\_T3-2\18C-24004\_M04\_octanol\_pH-metric high logP.t3r**

Experiment start time: **3/24/2018 4:11:23 AM**  
 Analyst: **Dorothy Levorse**  
 Instrument ID: **T312060**

## Sample graphs (continued)

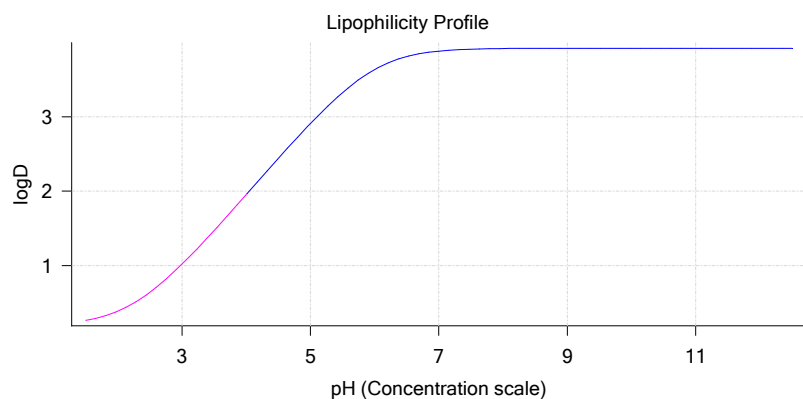

## Sample logD and percent species

| pH     | M04_octanol<br>logD | M04_octanol<br>M04_octanolH | M04_octanol<br>M04_octanol | M04_octanol<br>M04_octanolH* | M04_octanol<br>M04_octanol* | Comment    |
|--------|---------------------|-----------------------------|----------------------------|------------------------------|-----------------------------|------------|
| 1.000  | 0.21                | 90.48 %                     | 0.00 %                     | 9.00 %                       | 0.52 %                      | Stomach pH |
| 1.200  | 0.23                | 90.21 %                     | 0.00 %                     | 8.97 %                       | 0.82 %                      |            |
| 2.000  | 0.39                | 86.44 %                     | 0.01 %                     | 8.60 %                       | 4.96 %                      |            |
| 3.000  | 1.02                | 59.74 %                     | 0.06 %                     | 5.94 %                       | 34.25 %                     |            |
| 4.000  | 1.95                | 14.61 %                     | 0.16 %                     | 1.45 %                       | 83.78 %                     |            |
| 5.000  | 2.91                | 1.71 %                      | 0.18 %                     | 0.17 %                       | 97.94 %                     | Blood pH   |
| 6.000  | 3.63                | 0.17 %                      | 0.19 %                     | 0.02 %                       | 99.62 %                     |            |
| 6.500  | 3.81                | 0.06 %                      | 0.19 %                     | 0.01 %                       | 99.75 %                     |            |
| 7.000  | 3.88                | 0.02 %                      | 0.19 %                     | 0.00 %                       | 99.79 %                     |            |
| 7.400  | 3.90                | 0.01 %                      | 0.19 %                     | 0.00 %                       | 99.81 %                     |            |
| 8.000  | 3.92                | 0.00 %                      | 0.19 %                     | 0.00 %                       | 99.81 %                     |            |
| 9.000  | 3.92                | 0.00 %                      | 0.19 %                     | 0.00 %                       | 99.81 %                     |            |
| 10.000 | 3.92                | 0.00 %                      | 0.19 %                     | 0.00 %                       | 99.81 %                     |            |
| 11.000 | 3.92                | 0.00 %                      | 0.19 %                     | 0.00 %                       | 99.81 %                     |            |
| 12.000 | 3.92                | 0.00 %                      | 0.19 %                     | 0.00 %                       | 99.81 %                     |            |

## Carbonate and acidity

 Carbonate 0.131 mM  
 Acidity error -0.266 mM

## Other graphs

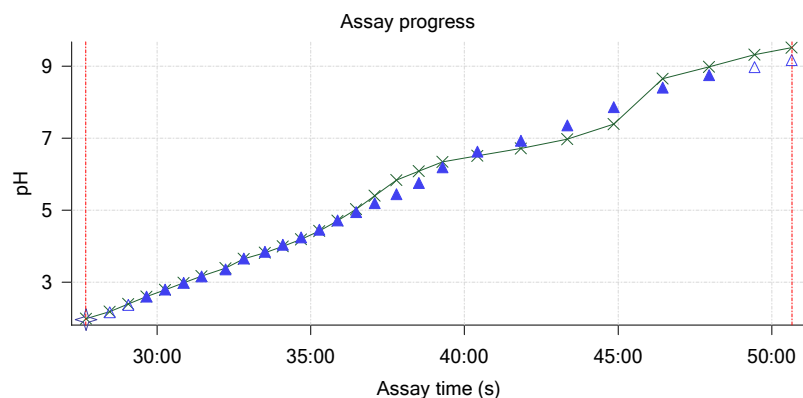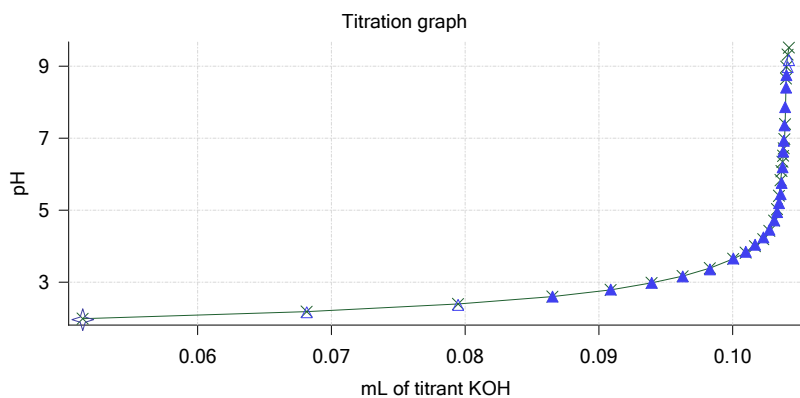



Sample name: **M04\_octanol**  
 Assay name: **pH-metric high logP**  
 Assay ID: **18C-24004**  
 Filename: **C:\Sirius\_T3\Mehtap\20180323\_exp33\_logP\_T3-2\18C-24004\_M04\_octanol\_pH-metric high logP.t3r**

Experiment start time: **3/24/2018 4:11:23 AM**  
 Analyst: **Dorothy Levorse**  
 Instrument ID: **T312060**

## Other graphs (continued)

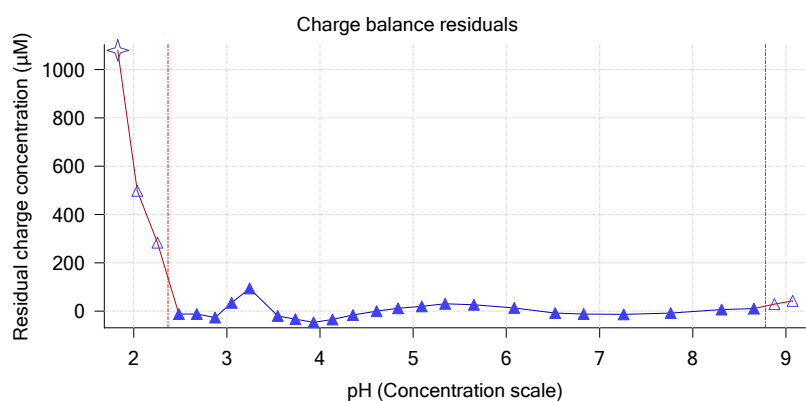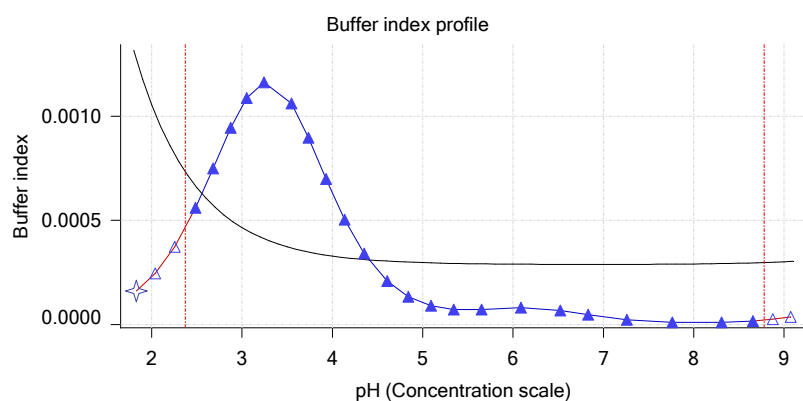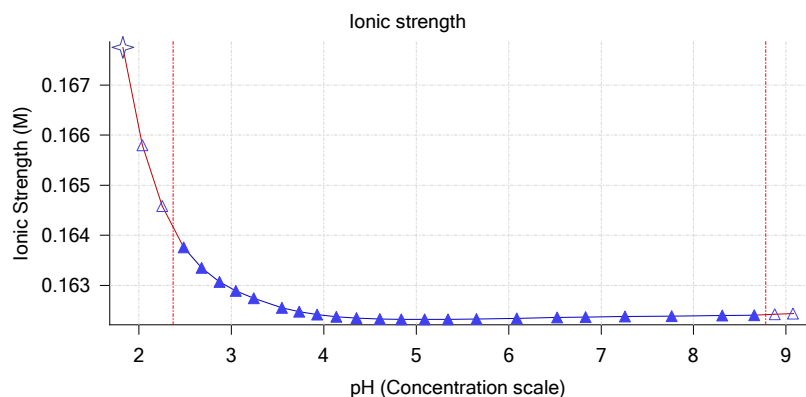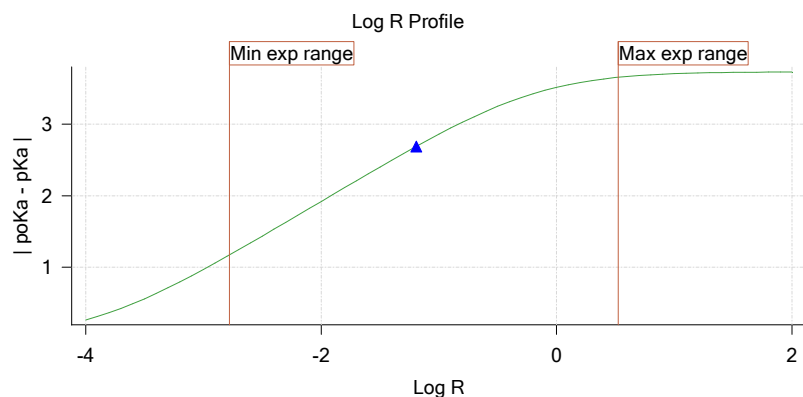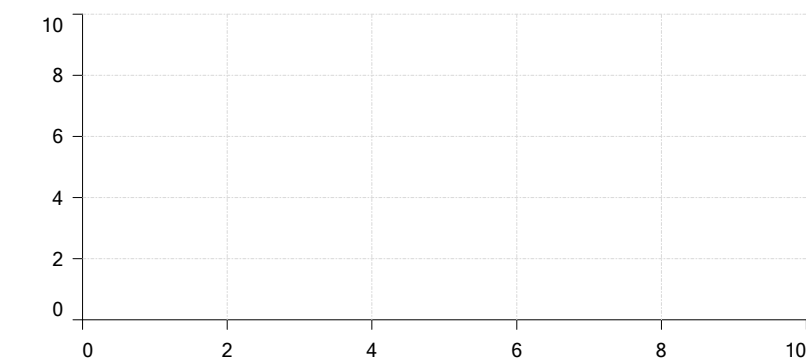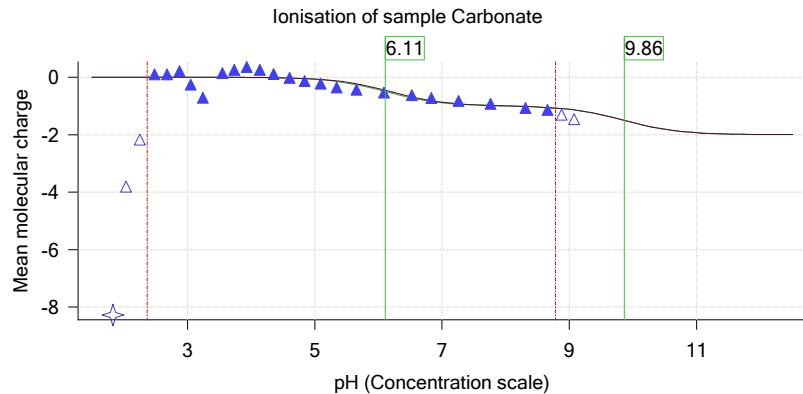

Sample name: **M04\_octanol**  
 Assay name: **pH-metric high logP**  
 Assay ID: **18C-24004**  
 Filename: **C:\Sirius\_T3\Mehtap\20180323\_exp33\_logP\_T3-2\18C-24004\_M04\_octanol\_pH-metric high logP.t3r**

Experiment start time: **3/24/2018 4:11:23 AM**  
 Analyst: **Dorothy Levorse**  
 Instrument ID: **T312060**

pH-metric high logP Titration 3 of 3 18C-24004 Points 51 to 77

## Overall results

RMSD 0.309  
 Average ionic strength 0.168 M  
 Average temperature 25.0°C  
 Partition ratio 0.2800 : 1  
 Analyte concentration range 2304.6 µM to 2362.2 µM  
 Total points considered 22 of 27

## Warnings and errors

Errors None  
 Warnings None

## Four-Plus parameters

|                                                                                |       |        |                      |                           |
|--------------------------------------------------------------------------------|-------|--------|----------------------|---------------------------|
|  | Alpha | 0.119  | 3/24/2018 4:11:23 AM | C:\Sirius_T3\HCl18C23.t3r |
|  | S     | 0.9972 | 3/24/2018 4:11:23 AM | C:\Sirius_T3\HCl18C23.t3r |
|  | jH    | 0.9    | 3/24/2018 4:11:23 AM | C:\Sirius_T3\HCl18C23.t3r |
|  | jOH   | -0.3   | 3/24/2018 4:11:23 AM | C:\Sirius_T3\HCl18C23.t3r |

## Titrants

|                                                                                 |            |          |                      |                           |
|---------------------------------------------------------------------------------|------------|----------|----------------------|---------------------------|
|   | 0.50 M HCl | 0.997124 | 3/24/2018 4:11:23 AM | C:\Sirius_T3\HCl18C23.t3r |
|  | 0.50 M KOH | 1.003190 | 3/24/2018 4:11:23 AM | C:\Sirius_T3\KOH18C23.t3r |

## Sample

|                                                                                  |                                  |       |
|----------------------------------------------------------------------------------|----------------------------------|-------|
|  | M04_octanol concentration factor | 0.822 |
|  | Base pKa 1                       | 5.97  |
|  | logP (XH +)                      | 0.19  |
|  | logP (neutral X)                 | 3.67  |

## Sample graphs

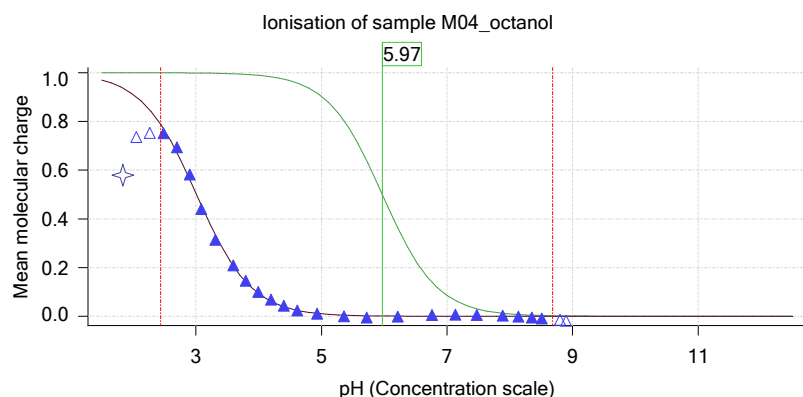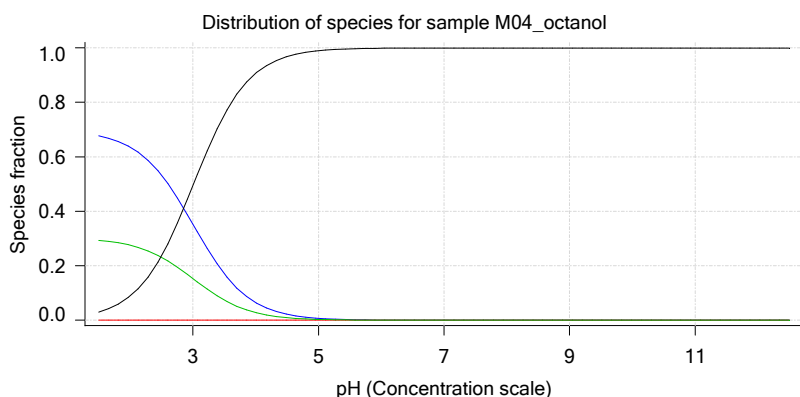

Sample name: **M04\_octanol**  
 Assay name: **pH-metric high logP**  
 Assay ID: **18C-24004**  
 Filename: **C:\Sirius\_T3\Mehtap\20180323\_exp33\_logP\_T3-2\18C-24004\_M04\_octanol\_pH-metric high logP.t3r**

Experiment start time: **3/24/2018 4:11:23 AM**  
 Analyst: **Dorothy Levorse**  
 Instrument ID: **T312060**

## Sample graphs (continued)

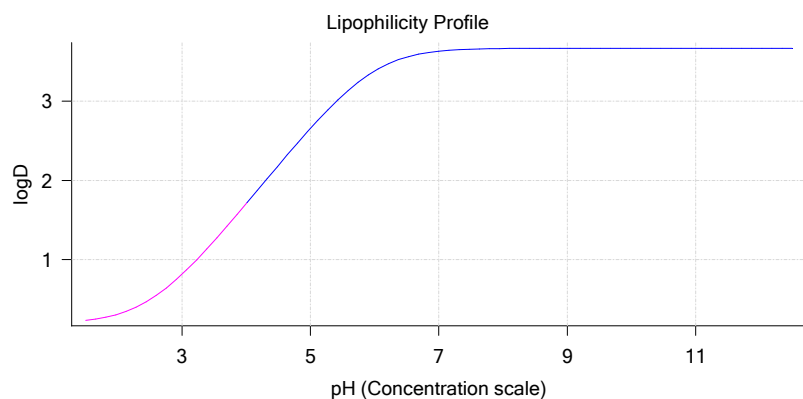

## Sample logD and percent species

| pH     | M04_octanol<br>logD | M04_octanol<br>M04_octanolH | M04_octanol<br>M04_octanolH | M04_octanol<br>M04_octanolH* | M04_octanol<br>M04_octanol* | Comment    |
|--------|---------------------|-----------------------------|-----------------------------|------------------------------|-----------------------------|------------|
| 1.000  | 0.20                | 69.08 %                     | 0.00 %                      | 29.96 %                      | 0.97 %                      | Stomach pH |
| 1.200  | 0.21                | 68.69 %                     | 0.00 %                      | 29.79 %                      | 1.52 %                      |            |
| 2.000  | 0.31                | 63.55 %                     | 0.01 %                      | 27.56 %                      | 8.88 %                      |            |
| 3.000  | 0.81                | 35.31 %                     | 0.04 %                      | 15.31 %                      | 49.33 %                     |            |
| 4.000  | 1.71                | 6.49 %                      | 0.07 %                      | 2.81 %                       | 90.63 %                     |            |
| 5.000  | 2.66                | 0.71 %                      | 0.08 %                      | 0.31 %                       | 98.91 %                     | Blood pH   |
| 6.000  | 3.38                | 0.07 %                      | 0.08 %                      | 0.03 %                       | 99.82 %                     |            |
| 6.500  | 3.56                | 0.02 %                      | 0.08 %                      | 0.01 %                       | 99.89 %                     |            |
| 7.000  | 3.63                | 0.01 %                      | 0.08 %                      | 0.00 %                       | 99.91 %                     |            |
| 7.400  | 3.65                | 0.00 %                      | 0.08 %                      | 0.00 %                       | 99.92 %                     |            |
| 8.000  | 3.66                | 0.00 %                      | 0.08 %                      | 0.00 %                       | 99.92 %                     |            |
| 9.000  | 3.67                | 0.00 %                      | 0.08 %                      | 0.00 %                       | 99.92 %                     |            |
| 10.000 | 3.67                | 0.00 %                      | 0.08 %                      | 0.00 %                       | 99.92 %                     |            |
| 11.000 | 3.67                | 0.00 %                      | 0.08 %                      | 0.00 %                       | 99.92 %                     |            |
| 12.000 | 3.67                | 0.00 %                      | 0.08 %                      | 0.00 %                       | 99.92 %                     |            |

## Carbonate and acidity

 Carbonate 0.118 mM  
 Acidity error -0.015 mM

## Other graphs

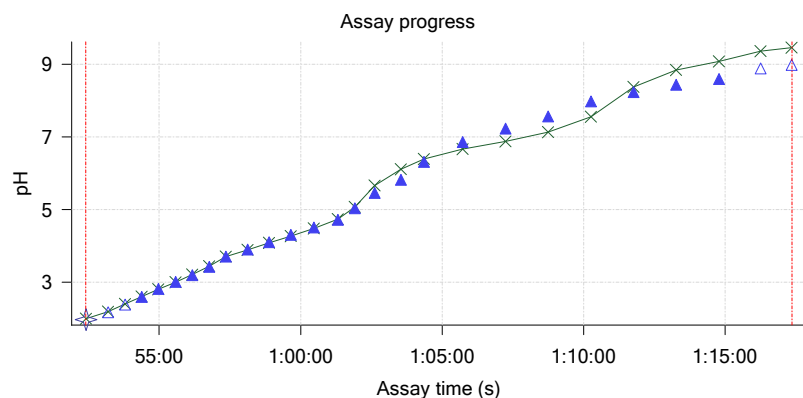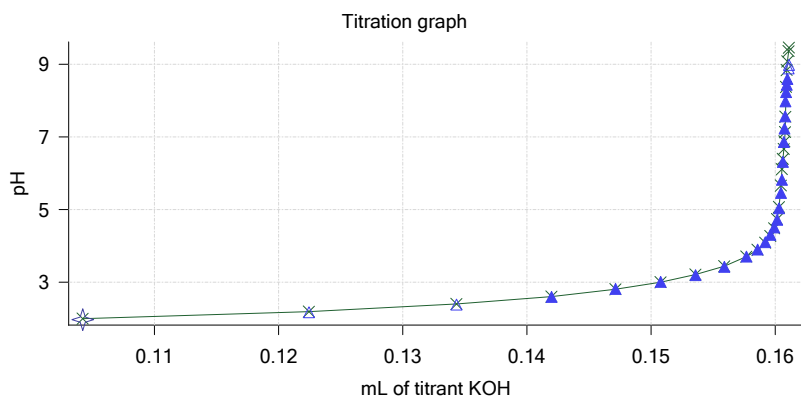

Sample name: **M04\_octanol**  
 Assay name: **pH-metric high logP**  
 Assay ID: **18C-24004**  
 Filename: **C:\Sirius\_T3\Mehtap\20180323\_exp33\_logP\_T3-2\18C-24004\_M04\_octanol\_pH-metric high logP.t3r**

Experiment start time: **3/24/2018 4:11:23 AM**  
 Analyst: **Dorothy Levorse**  
 Instrument ID: **T312060**

## Other graphs (continued)

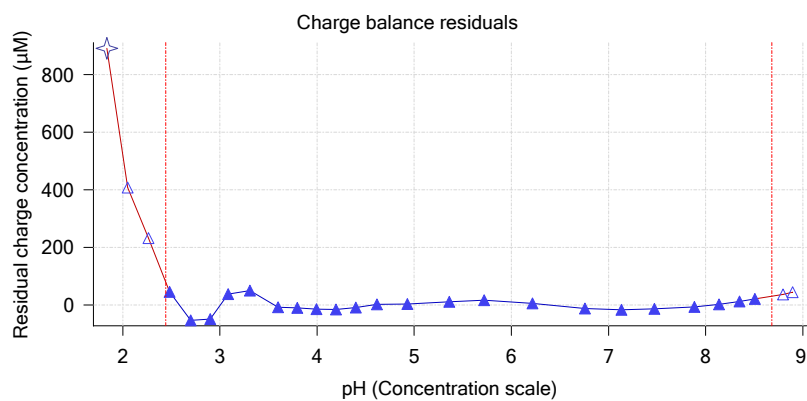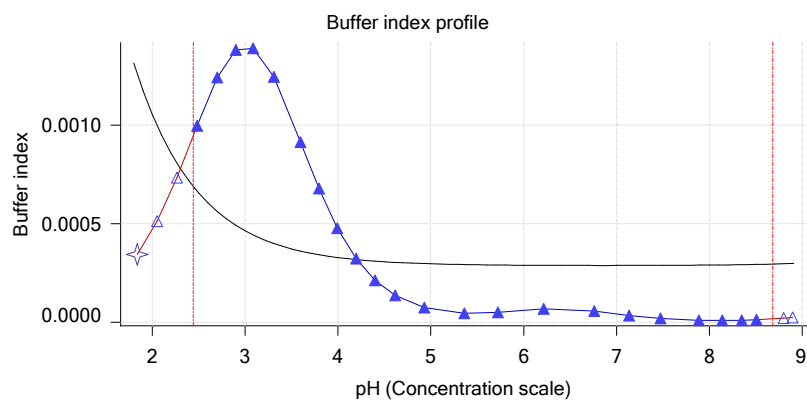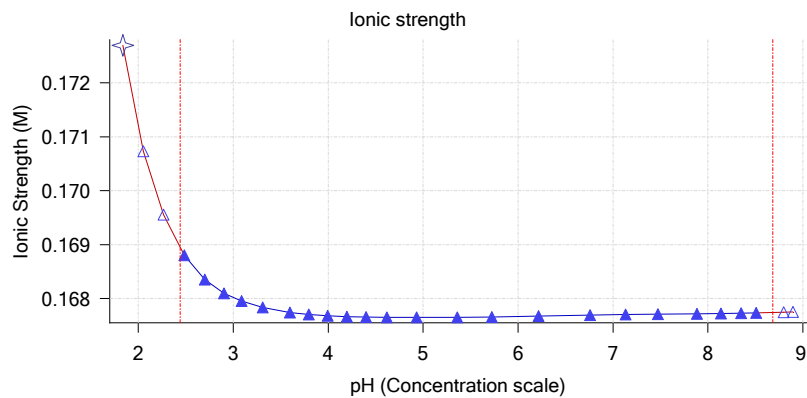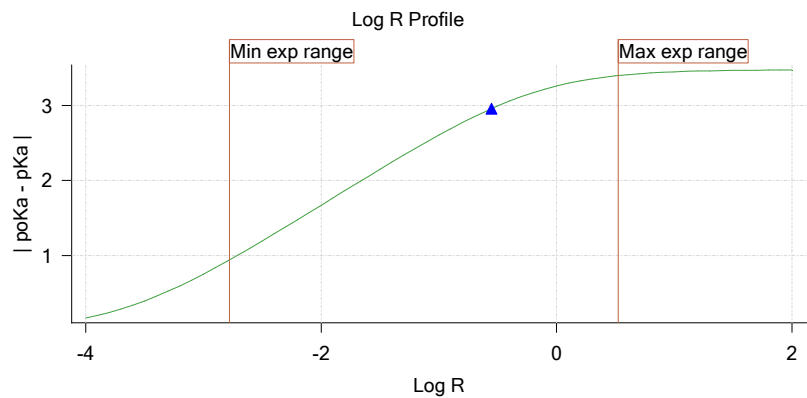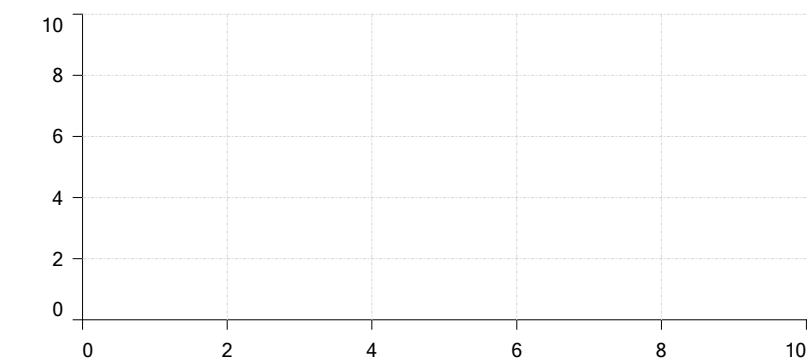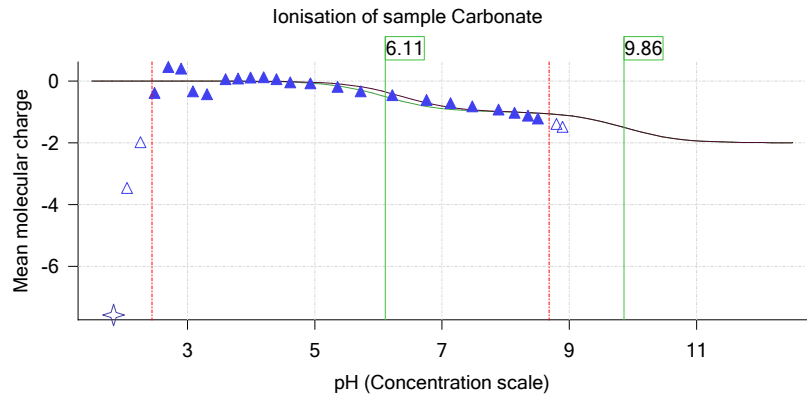

Sample name: **M04\_octanol**  
 Assay name: **pH-metric high logP**  
 Assay ID: **18C-24004**  
 Filename: **C:\Sirius\_T3\Mehtap\20180323\_exp33\_logP\_T3-2\18C-24004\_M04\_octanol\_pH-metric high logP.t3r**

Experiment start time: **3/24/2018 4:11:23 AM**  
 Analyst: **Dorothy Leverse**  
 Instrument ID: **T312060**

## Assay Model

| Settings                          | Value        | Date/Time changed    | Imported from      |
|-----------------------------------|--------------|----------------------|--------------------|
| Sample name                       | M04_octanol  | 3/9/2018 4:34:21 PM  | User entered value |
| Sample by                         | Weight       |                      | Default value      |
| Sample weight                     | 0.001450 g   | 3/23/2018 5:00:45 PM | User entered value |
| Formula weight                    | 269.73 g/mol | 3/9/2018 4:34:21 PM  | User entered value |
| Solubility                        | Unknown      |                      | Default value      |
| Molecular weight                  | 269.73       | 3/9/2018 4:34:21 PM  | User entered value |
| Individual pKa ionic environments | No           |                      | Default value      |
| Number of pKas                    | 1            | 3/9/2018 4:34:21 PM  | User entered value |
| Sample is a                       | Base         | 3/9/2018 4:34:21 PM  | User entered value |
| pKa 1                             | 5.97         | 3/9/2018 4:34:21 PM  | User entered value |
| logp (XH +)                       | 0.19         | 3/9/2018 4:34:33 PM  | User entered value |
| logP (neutral X)                  | 3.50         | 3/23/2018 2:32:46 PM | User entered value |

## Events

| Time    | Event             | Water      | Acid       | Base       | Octanol    | pH    | dpH/dt   | pH R-squared | pH SD   | dpH/dt time         |
|---------|-------------------|------------|------------|------------|------------|-------|----------|--------------|---------|---------------------|
| 5:00.3  | Initial pH = 8.35 |            |            |            |            |       |          |              |         |                     |
| 7:60.0  | Data point 1      | 1.50000 mL | 0.05115 mL | 0.00717 mL | 0.03001 mL | 2.013 | -0.00513 | 0.25311      | 0.00050 | 10.0 s              |
| 8:46.2  | Data point 2      | 1.50000 mL | 0.05115 mL | 0.02117 mL | 0.03001 mL | 2.222 | 0.00235  | 0.41042      | 0.00018 | 10.0 s              |
| 9:21.8  | Data point 3      | 1.50000 mL | 0.05115 mL | 0.03024 mL | 0.03001 mL | 2.432 | -0.00386 | 0.04058      | 0.00095 | 10.0 s              |
| 9:57.4  | Data point 4      | 1.50000 mL | 0.05115 mL | 0.03589 mL | 0.03001 mL | 2.652 | -0.00793 | 0.70535      | 0.00047 | 10.0 s              |
| 10:32.9 | Data point 5      | 1.50000 mL | 0.05115 mL | 0.03937 mL | 0.03001 mL | 2.857 | -0.00289 | 0.42030      | 0.00022 | 10.0 s              |
| 11:08.3 | Data point 6      | 1.50000 mL | 0.05115 mL | 0.04165 mL | 0.03001 mL | 3.054 | 0.00006  | 0.00064      | 0.00011 | 10.0 s              |
| 11:43.9 | Data point 7      | 1.50000 mL | 0.05115 mL | 0.04327 mL | 0.03001 mL | 3.257 | -0.00042 | 0.04360      | 0.00010 | 10.5 s              |
| 12:19.7 | Data point 8      | 1.50000 mL | 0.05115 mL | 0.04454 mL | 0.03001 mL | 3.464 | -0.00064 | 0.06303      | 0.00013 | 10.0 s              |
| 12:55.2 | Data point 9      | 1.50000 mL | 0.05115 mL | 0.04570 mL | 0.03001 mL | 3.661 | -0.00672 | 0.71058      | 0.00039 | 10.5 s              |
| 13:31.1 | Data point 10     | 1.50000 mL | 0.05115 mL | 0.04687 mL | 0.03001 mL | 3.861 | -0.00883 | 0.75826      | 0.00050 | 10.0 s              |
| 14:06.6 | Data point 11     | 1.50000 mL | 0.05115 mL | 0.04814 mL | 0.03001 mL | 4.103 | -0.01310 | 0.89589      | 0.00068 | 10.5 s              |
| 14:47.7 | Data point 12     | 1.50000 mL | 0.05115 mL | 0.04899 mL | 0.03001 mL | 4.289 | -0.00937 | 0.84367      | 0.00050 | 10.5 s              |
| 15:23.5 | Data point 13     | 1.50000 mL | 0.05115 mL | 0.04965 mL | 0.03001 mL | 4.508 | -0.01463 | 0.74199      | 0.00084 | 11.0 s              |
| 15:59.9 | Data point 14     | 1.50000 mL | 0.05115 mL | 0.05021 mL | 0.03001 mL | 4.755 | -0.01555 | 0.81188      | 0.00085 | 13.0 s              |
| 16:38.2 | Data point 15     | 1.50000 mL | 0.05115 mL | 0.05063 mL | 0.03001 mL | 5.109 | -0.01643 | 0.85150      | 0.00088 | 17.0 s              |
| 17:20.6 | Data point 16     | 1.50000 mL | 0.05115 mL | 0.05087 mL | 0.03001 mL | 5.521 | -0.01966 | 0.95659      | 0.00099 | 21.0 s              |
| 18:12.1 | Data point 17     | 1.50000 mL | 0.05115 mL | 0.05101 mL | 0.03001 mL | 5.806 | -0.01764 | 0.91085      | 0.00091 | 29.5 s              |
| 19:12.2 | Data point 18     | 1.50000 mL | 0.05115 mL | 0.05111 mL | 0.03001 mL | 6.280 | -0.01792 | 0.93360      | 0.00092 | 45.5 s              |
| 20:28.4 | Data point 19     | 1.50000 mL | 0.05115 mL | 0.05122 mL | 0.03001 mL | 7.844 | -0.08873 | 0.99672      | 0.00439 | Timed out at 59.5 s |
| 21:58.9 | Data point 20     | 1.50000 mL | 0.05115 mL | 0.05127 mL | 0.03001 mL | 8.410 | -0.04014 | 0.97727      | 0.00201 | Timed out at 59.5 s |
| 23:29.4 | Data point 21     | 1.50000 mL | 0.05115 mL | 0.05132 mL | 0.03001 mL | 8.719 | -0.02194 | 0.97381      | 0.00110 | Timed out at 59.5 s |
| 25:05.0 | Data point 22     | 1.50000 mL | 0.05115 mL | 0.05139 mL | 0.03001 mL | 8.993 | -0.01950 | 0.95962      | 0.00098 | 34.5 s              |
| 26:05.0 | Data point 23     | 1.50000 mL | 0.05115 mL | 0.05141 mL | 0.03001 mL | 9.001 | -0.01921 | 0.96673      | 0.00097 | 42.0 s              |
| 27:41.8 | Data point 24     | 1.50000 mL | 0.10503 mL | 0.05141 mL | 0.11002 mL | 1.955 | -0.00341 | 0.14587      | 0.00044 | 10.0 s              |
| 28:28.0 | Data point 25     | 1.50000 mL | 0.10503 mL | 0.06816 mL | 0.11002 mL | 2.160 | 0.00273  | 0.60068      | 0.00017 | 10.5 s              |
| 29:04.3 | Data point 26     | 1.50000 mL | 0.10503 mL | 0.07947 mL | 0.11002 mL | 2.371 | 0.00238  | 0.28453      | 0.00022 | 10.0 s              |
| 29:39.9 | Data point 27     | 1.50000 mL | 0.10503 mL | 0.08652 mL | 0.11002 mL | 2.601 | 0.00077  | 0.08864      | 0.00013 | 10.5 s              |
| 30:15.9 | Data point 28     | 1.50000 mL | 0.10503 mL | 0.09087 mL | 0.11002 mL | 2.792 | -0.01433 | 0.72766      | 0.00083 | 10.5 s              |
| 30:51.8 | Data point 29     | 1.50000 mL | 0.10503 mL | 0.09393 mL | 0.11002 mL | 2.985 | 0.01516  | 0.73138      | 0.00088 | 10.0 s              |
| 31:27.3 | Data point 30     | 1.50000 mL | 0.10503 mL | 0.09626 mL | 0.11002 mL | 3.161 | -0.01511 | 0.64124      | 0.00093 | 11.0 s              |
| 32:14.1 | Data point 31     | 1.50000 mL | 0.10503 mL | 0.09828 mL | 0.11002 mL | 3.353 | -0.00936 | 0.31606      | 0.00082 | 10.0 s              |
| 32:49.5 | Data point 32     | 1.50000 mL | 0.10503 mL | 0.10005 mL | 0.11002 mL | 3.657 | -0.00287 | 0.78697      | 0.00016 | 10.5 s              |
| 33:30.6 | Data point 33     | 1.50000 mL | 0.10503 mL | 0.10096 mL | 0.11002 mL | 3.844 | -0.00635 | 0.80051      | 0.00035 | 10.0 s              |
| 34:06.0 | Data point 34     | 1.50000 mL | 0.10503 mL | 0.10167 mL | 0.11002 mL | 4.038 | -0.00491 | 0.70908      | 0.00029 | 10.0 s              |
| 34:41.4 | Data point 35     | 1.50000 mL | 0.10503 mL | 0.10228 mL | 0.11002 mL | 4.243 | -0.00496 | 0.59949      | 0.00032 | 10.0 s              |
| 35:16.8 | Data point 36     | 1.50000 mL | 0.10503 mL | 0.10275 mL | 0.11002 mL | 4.459 | -0.00596 | 0.57925      | 0.00039 | 10.5 s              |
| 35:52.7 | Data point 37     | 1.50000 mL | 0.10503 mL | 0.10310 mL | 0.11002 mL | 4.712 | 0.00092  | 0.00227      | 0.00095 | 10.5 s              |

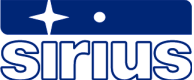

## Assay Events

Sample name: **M04\_octanol**  
Assay name: **pH-metric high logP**  
Assay ID: **18C-24004**  
Filename: **C:\Sirius\_T3\Mehtap\20180323\_exp33\_logP\_T3-2\18C-24004\_M04\_octanol\_pH-metric high logP.t3r**

Experiment start time: **3/24/2018 4:11:23 AM**  
Analyst: **Dorothy Leverse**  
Instrument ID: **T312060**

## Events (continued)

| Time      | Event         | Water      | Acid       | Base       | Octanol    | pH    | dpH/dt   | pH R-squared | pH SD   | dpH/dt time         |
|-----------|---------------|------------|------------|------------|------------|-------|----------|--------------|---------|---------------------|
| 36:28.6   | Data point 38 | 1.50000 mL | 0.10503 mL | 0.10332 mL | 0.11002 mL | 4.945 | -0.00605 | 0.33921      | 0.00051 | 11.0 s              |
| 37:05.0   | Data point 39 | 1.50000 mL | 0.10503 mL | 0.10346 mL | 0.11002 mL | 5.195 | -0.01462 | 0.70458      | 0.00086 | 12.0 s              |
| 37:47.6   | Data point 40 | 1.50000 mL | 0.10503 mL | 0.10358 mL | 0.11002 mL | 5.448 | -0.00465 | 0.09101      | 0.00076 | 13.0 s              |
| 38:31.1   | Data point 41 | 1.50000 mL | 0.10503 mL | 0.10365 mL | 0.11002 mL | 5.756 | -0.01450 | 0.74805      | 0.00083 | 15.5 s              |
| 39:17.2   | Data point 42 | 1.50000 mL | 0.10503 mL | 0.10372 mL | 0.11002 mL | 6.188 | -0.01751 | 0.88071      | 0.00092 | 38.0 s              |
| 40:25.8   | Data point 43 | 1.50000 mL | 0.10503 mL | 0.10376 mL | 0.11002 mL | 6.624 | -0.01828 | 0.88671      | 0.00096 | 59.5 s              |
| 41:50.7   | Data point 44 | 1.50000 mL | 0.10503 mL | 0.10381 mL | 0.11002 mL | 6.931 | -0.02021 | 0.98765      | 0.00100 | Timed out at 59.5 s |
| 43:21.2   | Data point 45 | 1.50000 mL | 0.10503 mL | 0.10386 mL | 0.11002 mL | 7.358 | -0.05882 | 0.99495      | 0.00291 | Timed out at 59.5 s |
| 44:51.6   | Data point 46 | 1.50000 mL | 0.10503 mL | 0.10390 mL | 0.11002 mL | 7.860 | -0.06638 | 0.98979      | 0.00330 | Timed out at 59.5 s |
| 46:27.2   | Data point 47 | 1.50000 mL | 0.10503 mL | 0.10398 mL | 0.11002 mL | 8.405 | -0.03574 | 0.99078      | 0.00177 | Timed out at 59.5 s |
| 47:57.6   | Data point 48 | 1.50000 mL | 0.10503 mL | 0.10402 mL | 0.11002 mL | 8.751 | -0.01947 | 0.94555      | 0.00099 | 58.0 s              |
| 49:26.2   | Data point 49 | 1.50000 mL | 0.10503 mL | 0.10412 mL | 0.11002 mL | 8.970 | -0.01588 | 0.97546      | 0.00079 | 42.0 s              |
| 50:38.7   | Data point 50 | 1.50000 mL | 0.10503 mL | 0.10421 mL | 0.11002 mL | 9.167 | -0.01890 | 0.92626      | 0.00097 | 28.5 s              |
| 52:25.2   | Data point 51 | 1.50000 mL | 0.16148 mL | 0.10421 mL | 0.51002 mL | 1.964 | -0.00413 | 0.66600      | 0.00025 | 10.5 s              |
| 53:11.9   | Data point 52 | 1.50000 mL | 0.16148 mL | 0.12244 mL | 0.51002 mL | 2.173 | 0.00880  | 0.67097      | 0.00053 | 10.0 s              |
| 53:47.6   | Data point 53 | 1.50000 mL | 0.16148 mL | 0.13434 mL | 0.51002 mL | 2.382 | 0.01052  | 0.53800      | 0.00071 | 10.0 s              |
| 54:23.2   | Data point 54 | 1.50000 mL | 0.16148 mL | 0.14198 mL | 0.51002 mL | 2.597 | -0.00151 | 0.05969      | 0.00031 | 10.0 s              |
| 54:58.7   | Data point 55 | 1.50000 mL | 0.16148 mL | 0.14713 mL | 0.51002 mL | 2.812 | -0.00306 | 0.69301      | 0.00018 | 10.5 s              |
| 55:34.7   | Data point 56 | 1.50000 mL | 0.16148 mL | 0.15078 mL | 0.51002 mL | 3.013 | -0.00746 | 0.20419      | 0.00082 | 10.0 s              |
| 56:10.2   | Data point 57 | 1.50000 mL | 0.16148 mL | 0.15360 mL | 0.51002 mL | 3.197 | 0.00123  | 0.02683      | 0.00037 | 10.5 s              |
| 56:46.2   | Data point 58 | 1.50000 mL | 0.16148 mL | 0.15590 mL | 0.51002 mL | 3.420 | -0.00821 | 0.19314      | 0.00092 | 10.0 s              |
| 57:21.7   | Data point 59 | 1.50000 mL | 0.16148 mL | 0.15769 mL | 0.51002 mL | 3.707 | 0.00459  | 0.14616      | 0.00059 | 10.0 s              |
| 58:07.4   | Data point 60 | 1.50000 mL | 0.16148 mL | 0.15858 mL | 0.51002 mL | 3.903 | -0.00128 | 0.00501      | 0.00089 | 10.0 s              |
| 58:53.1   | Data point 61 | 1.50000 mL | 0.16148 mL | 0.15920 mL | 0.51002 mL | 4.102 | -0.00123 | 0.00430      | 0.00093 | 10.0 s              |
| 59:38.9   | Data point 62 | 1.50000 mL | 0.16148 mL | 0.15962 mL | 0.51002 mL | 4.303 | -0.01215 | 0.38768      | 0.00096 | 13.5 s              |
| 1:00:28.1 | Data point 63 | 1.50000 mL | 0.16148 mL | 0.15993 mL | 0.51002 mL | 4.507 | -0.00113 | 0.00611      | 0.00072 | 10.0 s              |
| 1:01:18.9 | Data point 64 | 1.50000 mL | 0.16148 mL | 0.16016 mL | 0.51002 mL | 4.723 | 0.00118  | 0.00902      | 0.00061 | 10.5 s              |
| 1:01:54.8 | Data point 65 | 1.50000 mL | 0.16148 mL | 0.16033 mL | 0.51002 mL | 5.036 | -0.01870 | 0.92089      | 0.00096 | 11.5 s              |
| 1:02:36.9 | Data point 66 | 1.50000 mL | 0.16148 mL | 0.16047 mL | 0.51002 mL | 5.464 | -0.01865 | 0.92187      | 0.00096 | 25.0 s              |
| 1:03:32.5 | Data point 67 | 1.50000 mL | 0.16148 mL | 0.16056 mL | 0.51002 mL | 5.825 | -0.01533 | 0.67266      | 0.00092 | 18.5 s              |
| 1:04:21.6 | Data point 68 | 1.50000 mL | 0.16148 mL | 0.16063 mL | 0.51002 mL | 6.318 | -0.01905 | 0.96692      | 0.00096 | 51.5 s              |
| 1:05:43.7 | Data point 69 | 1.50000 mL | 0.16148 mL | 0.16070 mL | 0.51002 mL | 6.858 | -0.05249 | 0.96745      | 0.00264 | Timed out at 59.5 s |
| 1:07:14.2 | Data point 70 | 1.50000 mL | 0.16148 mL | 0.16075 mL | 0.51002 mL | 7.233 | -0.05610 | 0.97962      | 0.00280 | Timed out at 59.5 s |
| 1:08:44.7 | Data point 71 | 1.50000 mL | 0.16148 mL | 0.16079 mL | 0.51002 mL | 7.571 | -0.05662 | 0.99069      | 0.00281 | Timed out at 59.5 s |
| 1:10:15.2 | Data point 72 | 1.50000 mL | 0.16148 mL | 0.16084 mL | 0.51002 mL | 7.982 | -0.05547 | 0.99203      | 0.00275 | Timed out at 59.5 s |
| 1:11:45.7 | Data point 73 | 1.50000 mL | 0.16148 mL | 0.16089 mL | 0.51002 mL | 8.235 | -0.05197 | 0.96437      | 0.00261 | Timed out at 59.5 s |
| 1:13:16.2 | Data point 74 | 1.50000 mL | 0.16148 mL | 0.16094 mL | 0.51002 mL | 8.444 | -0.02913 | 0.98679      | 0.00145 | Timed out at 59.5 s |
| 1:14:46.7 | Data point 75 | 1.50000 mL | 0.16148 mL | 0.16098 mL | 0.51002 mL | 8.602 | -0.01977 | 0.98733      | 0.00098 | 47.0 s              |
| 1:16:14.7 | Data point 76 | 1.50000 mL | 0.16148 mL | 0.16108 mL | 0.51002 mL | 8.892 | -0.01379 | 0.56644      | 0.00091 | 35.5 s              |
| 1:17:20.7 | Data point 77 | 1.50000 mL | 0.16148 mL | 0.16112 mL | 0.51002 mL | 8.988 | -0.01977 | 0.96525      | 0.00099 | 28.5 s              |
| 1:17:58.3 | Assay volumes | 1.50000 mL | 0.16148 mL | 0.16112 mL | 0.51002 mL |       |          |              |         |                     |

Sample name: **M04\_octanol**  
 Assay name: **pH-metric high logP**  
 Assay ID: **18C-24004**  
 Filename: **C:\Sirius\_T3\Mehtap\20180323\_exp33\_logP\_T3-2\18C-24004\_M04\_octanol\_pH-metric high logP.t3r**

Experiment start time: **3/24/2018 4:11:23 AM**  
 Analyst: **Dorothy Levorse**  
 Instrument ID: **T312060**

## Assay Settings

| Setting                             | Value              | Original Value | Date/Time changed | Imported from |
|-------------------------------------|--------------------|----------------|-------------------|---------------|
| <b>General Settings</b>             |                    |                |                   |               |
| Analyst name                        | Dorothy Levorse    |                |                   |               |
| <b>Standard Experiment Settings</b> |                    |                |                   |               |
| Number of titrations                | 3                  |                |                   |               |
| Minimum pH                          | 2.000              |                |                   |               |
| Maximum pH                          | 9.000              |                |                   |               |
| pH step between points of           | 0.200              |                |                   |               |
| Minimum titrant addition            | 0.00002 mL         |                |                   |               |
| Maximum titrant addition            | 0.10000 mL         |                |                   |               |
| Argon flow rate                     | 100%               |                |                   |               |
| Start titration using               | Cautious pH adjust |                |                   |               |
| <b>Advanced General Settings</b>    |                    |                |                   |               |
| Detect turbidity using              | None               |                |                   |               |
| Collect turbidity sensor data       | No                 |                |                   |               |
| Collect UV spectra                  | No                 |                |                   |               |
| Stir after titrant addition for     | 5 seconds          |                |                   |               |
| For titrant addition, stir at       | 10%                |                |                   |               |
| <b>Titration Pre-Dose</b>           |                    |                |                   |               |
| Titration pre-dose                  | None               |                |                   |               |
| <b>Assay Medium</b>                 |                    |                |                   |               |
| ISA water volume                    | 1.50 mL            |                |                   |               |
| Water added                         | Automatic          |                |                   |               |
| Partition solvent type              | Octanol            |                |                   |               |
| Partition volume                    | 0.030 mL           |                |                   |               |
| Partition solvent added             | Automatic          |                |                   |               |
| After partition addition, stir for  | 1 seconds          |                |                   |               |
| <b>Sample Sonication</b>            |                    |                |                   |               |
| Sonicate                            | Yes                |                |                   |               |
| Adjust pH for sonication            | No                 |                |                   |               |
| Sonicate for                        | 60 seconds         |                |                   |               |
| After sonication stir for           | 5 seconds          |                |                   |               |
| <b>Sample Dissolution</b>           |                    |                |                   |               |
| Perform a dissolution stage         | Yes                |                |                   |               |
| Adjust and hold pH for dissolution  | To start pH        |                |                   |               |
| Stir to dissolve for                | 120 seconds        |                |                   |               |
| For dissolution, stir at            | 10%                |                |                   |               |
| <b>Carbonate purge</b>              |                    |                |                   |               |
| Perform a carbonate purge           | No                 |                |                   |               |
| <b>Temperature Control</b>          |                    |                |                   |               |
| Wait for temperature                | Yes                |                |                   |               |
| Required start temperature          | 25.0°C             |                |                   |               |
| Acceptable deviation                | 0.5°C              |                |                   |               |
| Time to wait                        | 60 seconds         |                |                   |               |
| Stir speed of                       | 50%                |                |                   |               |
| <b>Titration 1</b>                  |                    |                |                   |               |
| Titrate from                        | Low to high pH     |                |                   |               |
| Adjust to start pH                  | Yes                |                |                   |               |
| After pH adjust stir for            | 30 seconds         |                |                   |               |
| Stir to allow partitioning for      | 15 seconds         |                |                   |               |
| Stirrer speed for partitioning      | 50%                |                |                   |               |
| <b>Titration 2</b>                  |                    |                |                   |               |
| Titrate from                        | Low to high pH     |                |                   |               |
| Add additional water                | 0.00 mL            |                |                   |               |
| Additional partition solvent volume | 0.080 mL           |                |                   |               |
| Additional partition solvent added  | Automatic          |                |                   |               |
| After pH adjust stir for            | 30 seconds         |                |                   |               |
| Stir to allow partitioning for      | 15 seconds         |                |                   |               |
| Stirrer speed for partitioning      | 55%                |                |                   |               |



Sample name: **M04\_octanol**  
Assay name: **pH-metric high logP**  
Assay ID: **18C-24004**  
Filename: **C:\Sirius\_T3\Mehtap\20180323\_exp33\_logP\_T3-2\18C-24004\_M04\_octanol\_pH-metric high logP.t3r**

Experiment start time: **3/24/2018 4:11:23 AM**  
Analyst: **Dorothy Levorse**  
Instrument ID: **T312060**

## Assay Settings (continued)

| Setting                             | Value          | Original Value | Date/Time changed | Imported from |
|-------------------------------------|----------------|----------------|-------------------|---------------|
| <b>Titration 3</b>                  |                |                |                   |               |
| Titrate from                        | Low to high pH |                |                   |               |
| Add additional water                | 0.00 mL        |                |                   |               |
| Additional partition solvent volume | 0.400 mL       |                |                   |               |
| Additional partition solvent added  | Automatic      |                |                   |               |
| After pH adjust stir for            | 30 seconds     |                |                   |               |
| Stir to allow partitioning for      | 15 seconds     |                |                   |               |
| Stirrer speed for partitioning      | 60%            |                |                   |               |
| <b>Data Point Stability</b>         |                |                |                   |               |
| Stir during data point collection   | No             |                |                   |               |
| Delay before data point collection  | 0 seconds      |                |                   |               |
| Number of points to average         | 20 points      |                |                   |               |
| Time interval between points        | 0.50 seconds   |                |                   |               |
| Required maximum standard deviation | 0.00100 dpH/dt |                |                   |               |
| Stability timeout after             | 60 seconds     |                |                   |               |

## Calibration Settings

| Setting                   | Value  | Date/Time changed    | Imported from             |
|---------------------------|--------|----------------------|---------------------------|
| Four-Plus alpha           | 0.119  | 3/24/2018 4:11:23 AM | C:\Sirius_T3\HCl18C23.t3r |
| Four-Plus S               | 0.9972 | 3/24/2018 4:11:23 AM | C:\Sirius_T3\HCl18C23.t3r |
| Four-Plus jH              | 0.9    | 3/24/2018 4:11:23 AM | C:\Sirius_T3\HCl18C23.t3r |
| Four-Plus jOH             | -0.3   | 3/24/2018 4:11:23 AM | C:\Sirius_T3\HCl18C23.t3r |
| Base concentration factor | 1.003  | 3/24/2018 4:11:23 AM | C:\Sirius_T3\KOH18C23.t3r |
| Acid concentration factor | 0.997  | 3/24/2018 4:11:23 AM | C:\Sirius_T3\HCl18C23.t3r |

## Instrument Settings

| Setting              | Value                      | Batch Id    | Install date           |
|----------------------|----------------------------|-------------|------------------------|
| Instrument owner     | Merck                      |             |                        |
| Instrument ID        | T312060                    |             |                        |
| Instrument type      | T3 Simulator               |             |                        |
| Software version     | 1.1.3.0                    |             |                        |
| Dispenser module     |                            | T3DM1200361 | 3/31/2009 6:24:52 AM   |
| Dispenser 0          | Water                      |             | 3/31/2009 6:25:05 AM   |
| Syringe volume       | 2.5 mL                     |             |                        |
| Firmware version     | 1.2.1(r2)                  |             |                        |
| Titrant              | Water (0.15 M KCl)         | 02-06-2018  | 3/16/2018 11:09:18 AM  |
| Dispenser 2          | Acid                       |             | 3/31/2009 6:25:11 AM   |
| Syringe volume       | 0.5 mL                     |             |                        |
| Firmware version     | 1.2.1(r2)                  |             |                        |
| Titrant              | Acid (0.5 M HCl)           | 03-16-2018  | 3/16/2018 10:56:23 AM  |
| Dispenser 1          | Base                       |             | 3/31/2009 6:25:21 AM   |
| Syringe volume       | 0.5 mL                     |             |                        |
| Firmware version     | 1.2.1(r2)                  |             |                        |
| Titrant              | Base (0.5 M KOH)           | 3/22/2018   | 3/23/2018 9:34:17 AM   |
| Dispenser 5          | Cosolvent                  |             | 3/31/2009 6:26:24 AM   |
| Syringe volume       | 2.5 mL                     |             |                        |
| Firmware version     | 1.2.1(r2)                  |             |                        |
| Distribution valve 5 | Distribution Valve         |             | 3/31/2009 6:28:19 AM   |
| Firmware version     | 1.1.3                      |             |                        |
| Port A               | Methanol (80%, 0.15 M KCl) | 02-08-2018  | 3/6/2018 10:28:59 AM   |
| Port B               | Cyclohexane                | 11-01-17    | 2/27/2018 11:37:57 AM  |
| Dispenser 3          | Buffer                     |             | 8/3/2010 6:05:16 AM    |
| Syringe volume       | 0.5 mL                     |             |                        |
| Firmware version     | 1.2.1(r2)                  |             |                        |
| Titrant              | Dodecane                   | 2018/01/31  | 2/28/2018 11:18:04 AM  |
| Dispenser 6          | Octanol                    |             | 10/22/2010 11:52:43 AM |



Sample name: **M04\_octanol** Experiment start time: **3/24/2018 4:11:23 AM**  
 Assay name: **pH-metric high logP** Analyst: **Dorothy Levorse**  
 Assay ID: **18C-24004** Instrument ID: **T312060**  
 Filename: **C:\Sirius\_T3\Mehtap\20180323\_exp33\_logP\_T3-2\18C-24004\_M04\_octanol\_pH-metric high logP.t3r**

## Instrument Settings (continued)

| Setting                                   | Value                      | Batch Id    | Install date           |
|-------------------------------------------|----------------------------|-------------|------------------------|
| Syringe volume                            | 0.5 mL                     |             |                        |
| Firmware version                          | 1.2.1(r2)                  |             |                        |
| Titrant                                   | Octanol                    | 01-31-2018  | 2/27/2018 10:59:35 AM  |
| Titration                                 |                            | T3TM1200161 | 3/31/2009 6:24:17 AM   |
| Horizontal axis firmware version          | 1.17 AI1DI2DO2 Stepper 2   |             |                        |
| Vertical axis firmware version            | 1.17 AI1DI2DO2 Stepper 2   |             |                        |
| Chassis I/O firmware version              | 1.11 AI1DI0DO4 Norgren I/O |             |                        |
| Probe I/O firmware version                | 1.1.1                      |             |                        |
| Electrode                                 | T3 Electrode               | T3E0923     | 1/23/2018 3:01:00 PM   |
| E0 calibration                            | +4.67 mV                   |             | 3/24/2018 4:11:51 AM   |
| Filling solution                          | 3M KCl                     | KCL097      | 3/23/2018 9:29:07 AM   |
| Liquids                                   |                            |             |                        |
| Wash 1                                    | 50% IPA:50% Water          |             | 3/23/2018 9:29:12 AM   |
| Wash 2                                    | 0.5% Triton X-100 in H2O   |             | 3/23/2018 9:29:15 AM   |
| Buffer position 1                         | pH7 Wash                   |             | 3/23/2018 9:29:19 AM   |
| Buffer position 2                         | pH 7                       |             | 3/23/2018 9:29:21 AM   |
| Storage position                          |                            |             | 3/23/2018 9:30:23 AM   |
| Wash water                                | 7.6e+003 mL                | 03-12-2018  | 3/12/2018 9:25:04 AM   |
| Waste                                     | 2.6e+003 mL                |             | 3/12/2018 9:24:49 AM   |
| Temperature controller                    |                            |             | 8/5/2010 7:35:13 AM    |
| Turbidity detector                        |                            |             | 3/31/2009 6:24:45 AM   |
| Spectrometer                              |                            | 074811      | 11/23/2010 12:22:28 PM |
| Dip probe                                 |                            | 10196       |                        |
| Wavelength coefficient A0                 | 183.333                    |             |                        |
| Wavelength coefficient A1                 | 2.21568                    |             |                        |
| Wavelength coefficient A2                 | -0.000289308               |             |                        |
| Total lamp lit time                       | 162:53:01                  |             | 11/23/2010 12:22:28 PM |
| Calibrated on                             | 2/27/2018 11:40:38 AM      |             |                        |
| Integration time                          | 40                         |             |                        |
| Scans averaged                            | 10                         |             |                        |
| Autoloader                                |                            | T3AL1200345 | 11/10/2015 10:34:13 AM |
| Left-right axis firmware version          | 1.17 AI1DI2DO2 Stepper 2   |             |                        |
| Front-back axis firmware version          | 1.17 AI1DI2DO2 Stepper 2   |             |                        |
| Vertical axis firmware version            | 1.17 AI1DI2DO2 Stepper 2   |             |                        |
| Chassis I/O firmware version              | 1.11 AI1DI0DO4 Norgren I/O |             |                        |
| Configuration                             |                            |             |                        |
| Alternate titration position              | Titration position         |             |                        |
| Alternate reference position              | Reference position         |             |                        |
| Maximum standard vial volume              | 3.50 mL                    |             |                        |
| Maximum alternate vial volume             | 25.00 mL                   |             |                        |
| Automatic action idle period              | 5 minute(s)                |             |                        |
| Titration tube volume                     | 1.3 mL                     |             |                        |
| Syringe flush count                       | 3.50                       |             |                        |
| Flowing wash pump volume                  | 20.0 mL                    |             |                        |
| Flowing wash stir duration                | 5 s                        |             |                        |
| Flowing wash stir speed                   | 30%                        |             |                        |
| Solvent wash stir duration                | 5 s                        |             |                        |
| Solvent wash stir speed                   | 30%                        |             |                        |
| Surfactant wash stir duration             | 5 s                        |             |                        |
| Surfactant wash stir speed                | 30%                        |             |                        |
| E0 calibration minimum number of points   | 10                         |             |                        |
| E0 calibration maximum standard deviation | 0.01500                    |             |                        |
| E0 calibration timeout period             | 60 s                       |             |                        |
| E0 calibration stir duration              | 5 s                        |             |                        |
| E0 calibration preparation stir speed     | 30%                        |             |                        |
| E0 calibration buffer wash stir duration  | 5 s                        |             |                        |
| E0 calibration buffer wash stir speed     | 30%                        |             |                        |
| E0 calibration reading stir speed         | 0%                         |             |                        |



## Assay Settings

Sample name: **M04\_octanol**  
Assay name: **pH-metric high logP**  
Assay ID: **18C-24004**  
Filename: **C:\Sirius\_T3\Mehtap\20180323\_exp33\_logP\_T3-2\18C-24004\_M04\_octanol\_pH-metric high logP.t3r**

Experiment start time: **3/24/2018 4:11:23 AM**  
Analyst: **Dorothy Levorse**  
Instrument ID: **T312060**

### Instrument Settings (continued)

| Setting                                     | Value   | Batch Id | Install date |
|---------------------------------------------|---------|----------|--------------|
| Spectrometer calibration stir duration      | 5 s     |          |              |
| Spectrometer calibration stir speed         | 30%     |          |              |
| Spectrometer calibration wash pump volume   | 20.0 mL |          |              |
| Spectrometer calibration wash stir duration | 5 s     |          |              |
| Spectrometer calibration wash stir speed    | 30%     |          |              |
| Overhead dispense height                    | 10000   |          |              |

### Refinement Settings

| Setting                        | Value    | Default value |
|--------------------------------|----------|---------------|
| Turbidity detection method     | None     | None          |
| Turbidity wavelength to assess | 500.0 nm | 500.0 nm      |
| Turbidity maximum absorbance   | 0.100    | 0.100         |
| Turbidity probe threshold      | 50.00    | 50.00         |
