# Supplementary material for: Octanol-water partition coefficient measurements for the SAMPL6 Blind Prediction Challenge
Source: bioRxiv or medRxiv preprint supplement (doi:10.1101/757393), 2019-12-02
Supplement: Supplementary file [file media-2.zip]

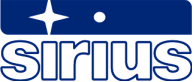

Sample name: **M15\_octanol**  
Assay name: **pH-metric high logP**  
Assay ID: **18C-01005**  
Filename: **C:\Sirius\_T3\Mehtap\20180228\_exp28\_logP\_T3-2\18C-01005\_M15\_octanol\_pH-metric high logP.t3r**

Experiment start time: **3/1/2018 6:16:08 AM**  
Analyst: **Pion**  
Instrument ID: **T312060**

## pH-metric Result

logP (XH2 2+) -5.50  
logP (XH +) -0.05 ±0.07 (n=50)  
logP (neutral X) 1.93 ±0.01 (n=50)

### 18C-01005 Points 1 to 35

M15\_octanol concentration factor 0.875  
Carbonate 0.2232 mM  
Acidity error -0.23667 mM

### 18C-01005 Points 36 to 71

M15\_octanol concentration factor 0.909  
Carbonate 0.1837 mM  
Acidity error -0.20987 mM

### 18C-01005 Points 72 to 105

M15\_octanol concentration factor 0.947  
Carbonate 0.0524 mM  
Acidity error -0.05926 mM

## Warnings and errors

Errors None  
Warnings One or more logP values out of range

## Sample logD and percent species

| pH     | M15_octanol<br>logD | M15_octanol<br>M15_octanolH2 | M15_octanol<br>M15_octanolH | M15_octanol<br>M15_octanol | M15_octanol<br>M15_octanolH2* | M15_octanol<br>M15_octanolH* | M15_octanol<br>M15_octanol* | Comment       |
|--------|---------------------|------------------------------|-----------------------------|----------------------------|-------------------------------|------------------------------|-----------------------------|---------------|
| 1.000  | -1.64               | 95.26 %                      | 2.51 %                      | 0.00 %                     | 0.00 %                        | 2.22 %                       | 0.01 %                      | Stomach<br>pH |
| 1.200  | -1.45               | 92.68 %                      | 3.86 %                      | 0.00 %                     | 0.00 %                        | 3.43 %                       | 0.03 %                      |               |
| 2.000  | -0.71               | 66.33 %                      | 17.45 %                     | 0.01 %                     | 0.00 %                        | 15.47 %                      | 0.75 %                      |               |
| 3.000  | -0.02               | 14.08 %                      | 37.04 %                     | 0.19 %                     | 0.00 %                        | 32.84 %                      | 15.86 %                     | Blood pH      |
| 4.000  | 0.68                | 0.61 %                       | 15.98 %                     | 0.80 %                     | 0.00 %                        | 14.17 %                      | 68.44 %                     |               |
| 5.000  | 1.46                | 0.01 %                       | 2.21 %                      | 1.11 %                     | 0.00 %                        | 1.96 %                       | 94.71 %                     |               |
| 6.000  | 1.85                | 0.00 %                       | 0.23 %                      | 1.15 %                     | 0.00 %                        | 0.20 %                       | 98.41 %                     |               |
| 6.500  | 1.91                | 0.00 %                       | 0.07 %                      | 1.16 %                     | 0.00 %                        | 0.06 %                       | 98.71 %                     |               |
| 7.000  | 1.92                | 0.00 %                       | 0.02 %                      | 1.16 %                     | 0.00 %                        | 0.02 %                       | 98.80 %                     |               |
| 7.400  | 1.93                | 0.00 %                       | 0.01 %                      | 1.16 %                     | 0.00 %                        | 0.01 %                       | 98.83 %                     |               |
| 8.000  | 1.93                | 0.00 %                       | 0.00 %                      | 1.16 %                     | 0.00 %                        | 0.00 %                       | 98.84 %                     |               |
| 9.000  | 1.93                | 0.00 %                       | 0.00 %                      | 1.16 %                     | 0.00 %                        | 0.00 %                       | 98.84 %                     |               |
| 10.000 | 1.93                | 0.00 %                       | 0.00 %                      | 1.16 %                     | 0.00 %                        | 0.00 %                       | 98.84 %                     |               |
| 11.000 | 1.93                | 0.00 %                       | 0.00 %                      | 1.16 %                     | 0.00 %                        | 0.00 %                       | 98.84 %                     |               |
| 12.000 | 1.93                | 0.00 %                       | 0.00 %                      | 1.16 %                     | 0.00 %                        | 0.00 %                       | 98.84 %                     |               |

Sample name: **M15\_octanol**  
 Assay name: **pH-metric high logP**  
 Assay ID: **18C-01005**  
 Filename: **C:\Sirius\_T3\Mehtap\20180228\_exp28\_logP\_T3-2\18C-01005\_M15\_octanol\_pH-metric high logP.t3r**

Experiment start time: **3/1/2018 6:16:08 AM**  
 Analyst: **Pion**  
 Instrument ID: **T312060**

## Graphs

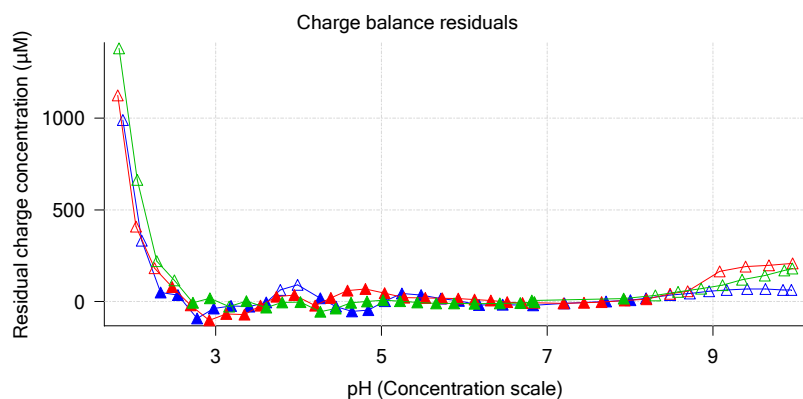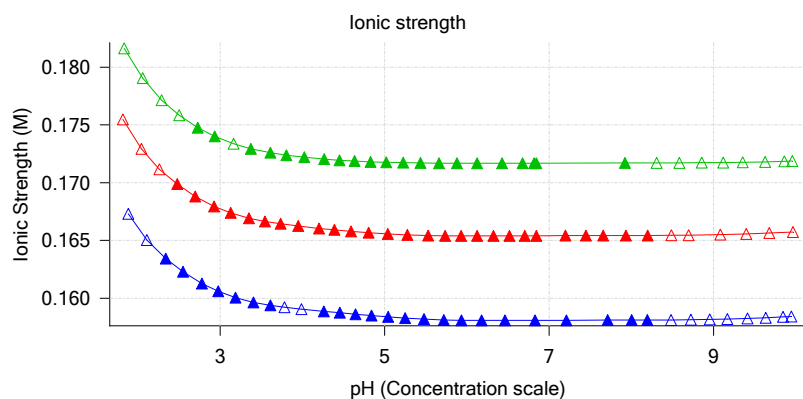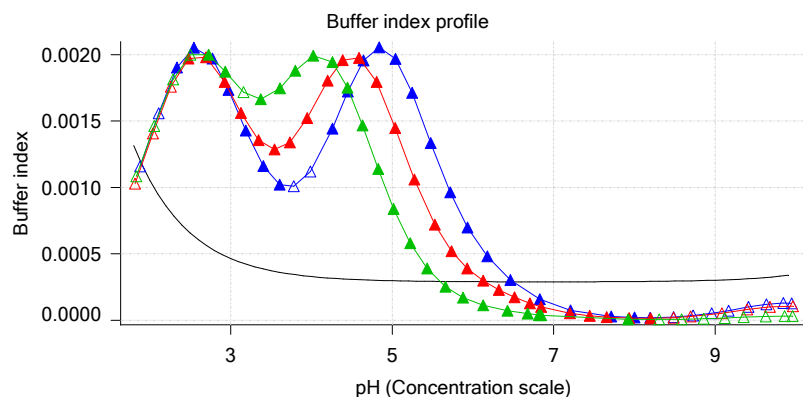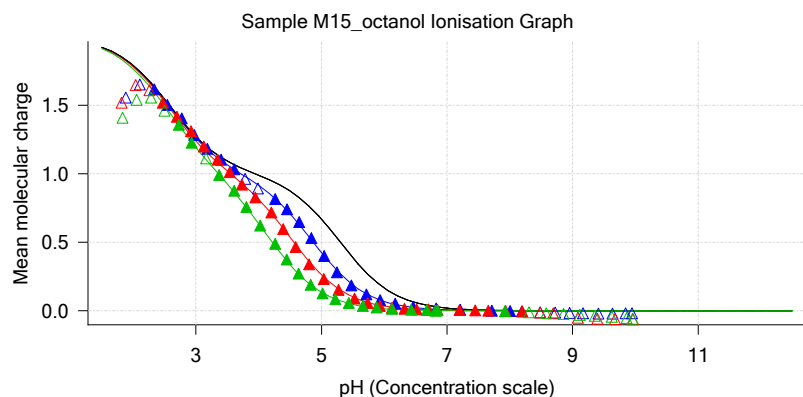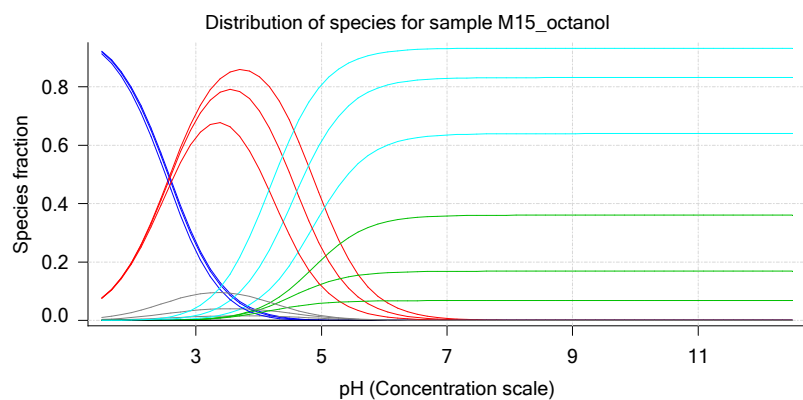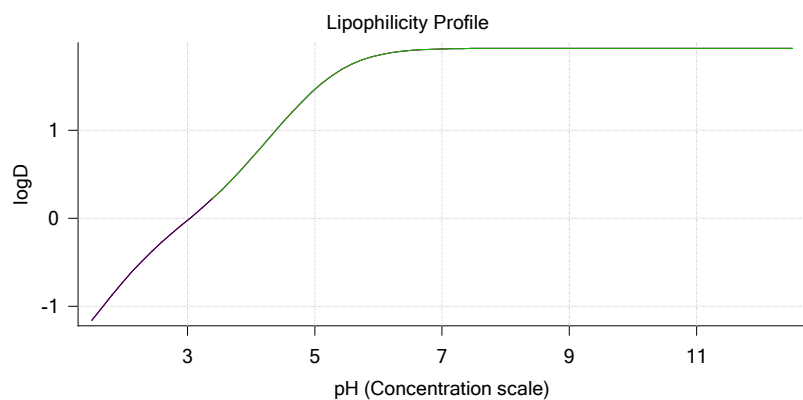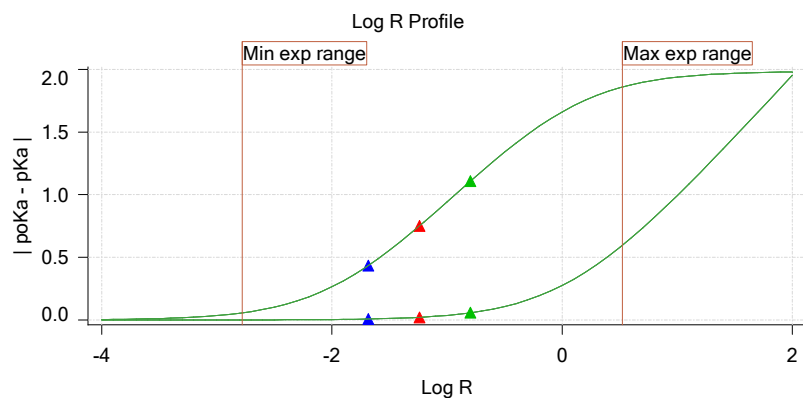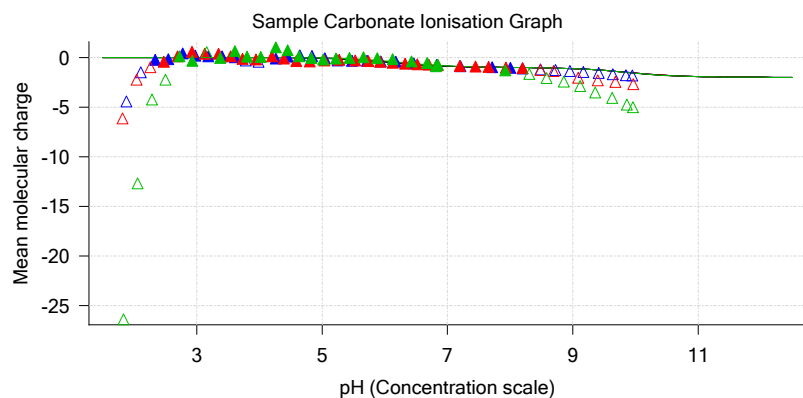

Sample name: **M15\_octanol** Experiment start time: **3/1/2018 6:16:08 AM**  
 Assay name: **pH-metric high logP** Analyst: **Pion**  
 Assay ID: **18C-01005** Instrument ID: **T312060**  
 Filename: **C:\Sirius\_T3\Mehtap\20180228\_exp28\_logP\_T3-2\18C-01005\_M15\_octanol\_pH-metric high logP.t3r**

## Graphs (continued)

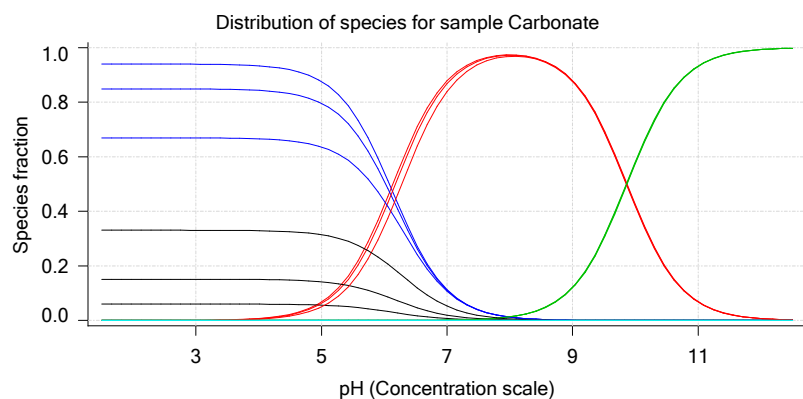

Sample name: **M15\_octanol**  
 Assay name: **pH-metric high logP**  
 Assay ID: **18C-01005**  
 Filename: **C:\Sirius\_T3\Mehtap\20180228\_exp28\_logP\_T3-2\18C-01005\_M15\_octanol\_pH-metric high logP.t3r**

Experiment start time: **3/1/2018 6:16:08 AM**  
 Analyst: **Pion**  
 Instrument ID: **T312060**

## pH-metric high logP Titration 1 of 3 18C-01005 Points 1 to 35

### Overall results

RMSD 0.176  
 Average ionic strength 0.159 M  
 Average temperature 25.0°C  
 Partition ratio 0.0208 : 1  
 Analyte concentration range 3855.0 µM to 4000.4 µM  
 Total points considered 23 of 35

### Warnings and errors

Errors None  
 Warnings One or more logP values out of range

### Four-Plus parameters

Alpha 0.130 3/1/2018 6:16:08 AM C:\Sirius\_T3\HCl18B27.t3r  
 S 0.9970 3/1/2018 6:16:08 AM C:\Sirius\_T3\HCl18B27.t3r  
 jH 0.8 3/1/2018 6:16:08 AM C:\Sirius\_T3\HCl18B27.t3r  
 jOH -0.4 3/1/2018 6:16:08 AM C:\Sirius\_T3\HCl18B27.t3r

### Titrants

0.50 M HCl 0.993513 3/1/2018 6:16:08 AM C:\Sirius\_T3\HCl18B27.t3r  
 0.50 M KOH 0.999845 3/1/2018 6:16:08 AM C:\Sirius\_T3\KOH18B27.t3r

### Sample

M15\_octanol concentration factor 0.875  
 Base pKa 1 2.58  
 Base pKa 2 5.30  
 logP (XH2 2+) -5.50  
 logP (XH +) -3.48  
 logP (neutral X) 1.91

### Sample graphs

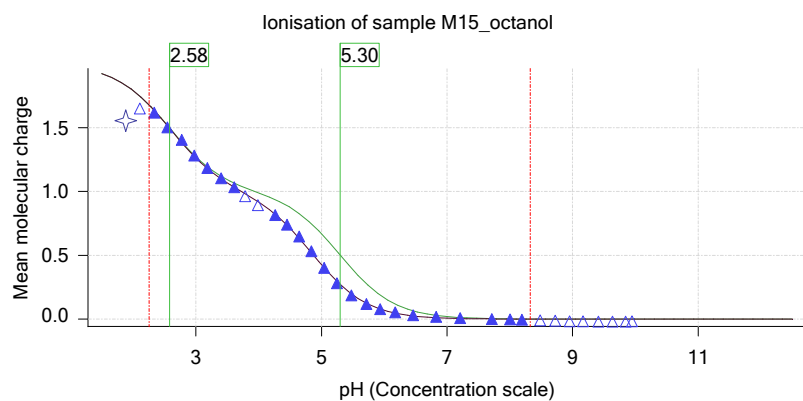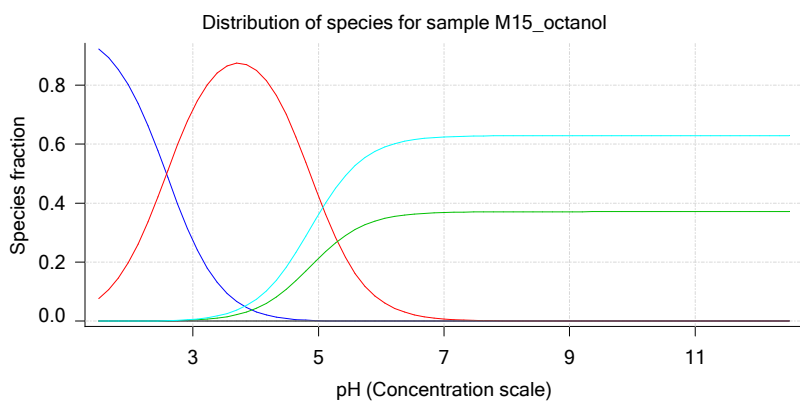

Sample name: **M15\_octanol**  
Assay name: **pH-metric high logP**  
Assay ID: **18C-01005**  
Filename: **C:\Sirius\_T3\Mehtap\20180228\_exp28\_logP\_T3-2\18C-01005\_M15\_octanol\_pH-metric high logP.t3r**

Experiment start time: **3/1/2018 6:16:08 AM**  
Analyst: **Pion**  
Instrument ID: **T312060**

## Sample graphs (continued)

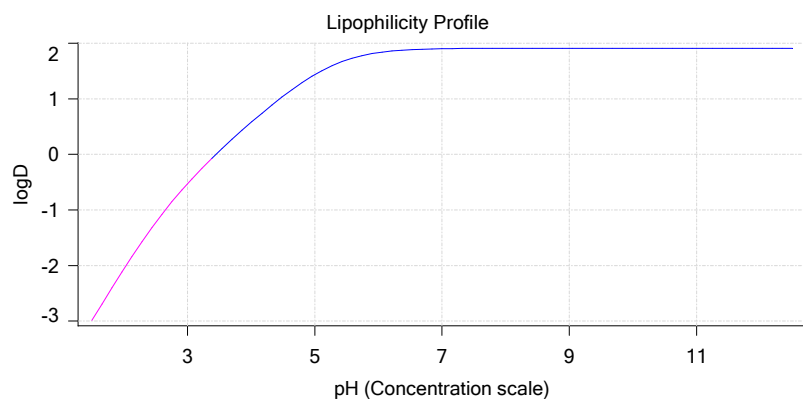

## Sample logD and percent species

| pH     | M15_octanol<br>logD | M15_octanol<br>M15_octanolH2 | M15_octanol<br>M15_octanolH | M15_octanol<br>M15_octanol | M15_octanol<br>M15_octanolH2* | M15_octanol<br>M15_octanolH* | M15_octanol<br>M15_octanol* | Comment       |
|--------|---------------------|------------------------------|-----------------------------|----------------------------|-------------------------------|------------------------------|-----------------------------|---------------|
| 1.000  | -3.93               | 97.44 %                      | 2.56 %                      | 0.00 %                     | 0.00 %                        | 0.00 %                       | 0.00 %                      | Stomach<br>pH |
| 1.200  | -3.56               | 96.00 %                      | 4.00 %                      | 0.00 %                     | 0.00 %                        | 0.00 %                       | 0.00 %                      |               |
| 2.000  | -2.07               | 79.15 %                      | 20.82 %                     | 0.01 %                     | 0.00 %                        | 0.00 %                       | 0.02 %                      |               |
| 3.000  | -0.53               | 27.28 %                      | 71.75 %                     | 0.36 %                     | 0.00 %                        | 0.00 %                       | 0.61 %                      |               |
| 4.000  | 0.58                | 3.24 %                       | 85.24 %                     | 4.27 %                     | 0.00 %                        | 0.00 %                       | 7.24 %                      | Blood pH      |
| 5.000  | 1.43                | 0.16 %                       | 42.47 %                     | 21.28 %                    | 0.00 %                        | 0.00 %                       | 36.08 %                     |               |
| 6.000  | 1.83                | 0.00 %                       | 6.89 %                      | 34.54 %                    | 0.00 %                        | 0.00 %                       | 58.56 %                     |               |
| 6.500  | 1.89                | 0.00 %                       | 2.29 %                      | 36.25 %                    | 0.00 %                        | 0.00 %                       | 61.46 %                     |               |
| 7.000  | 1.90                | 0.00 %                       | 0.73 %                      | 36.83 %                    | 0.00 %                        | 0.00 %                       | 62.44 %                     |               |
| 7.400  | 1.91                | 0.00 %                       | 0.29 %                      | 36.99 %                    | 0.00 %                        | 0.00 %                       | 62.71 %                     |               |
| 8.000  | 1.91                | 0.00 %                       | 0.07 %                      | 37.07 %                    | 0.00 %                        | 0.00 %                       | 62.85 %                     |               |
| 9.000  | 1.91                | 0.00 %                       | 0.01 %                      | 37.10 %                    | 0.00 %                        | 0.00 %                       | 62.89 %                     |               |
| 10.000 | 1.91                | 0.00 %                       | 0.00 %                      | 37.10 %                    | 0.00 %                        | 0.00 %                       | 62.90 %                     |               |
| 11.000 | 1.91                | 0.00 %                       | 0.00 %                      | 37.10 %                    | 0.00 %                        | 0.00 %                       | 62.90 %                     |               |
| 12.000 | 1.91                | 0.00 %                       | 0.00 %                      | 37.10 %                    | 0.00 %                        | 0.00 %                       | 62.90 %                     |               |

## Carbonate and acidity

Carbonate 0.223 mM  
Acidity error -0.237 mM

## Other graphs

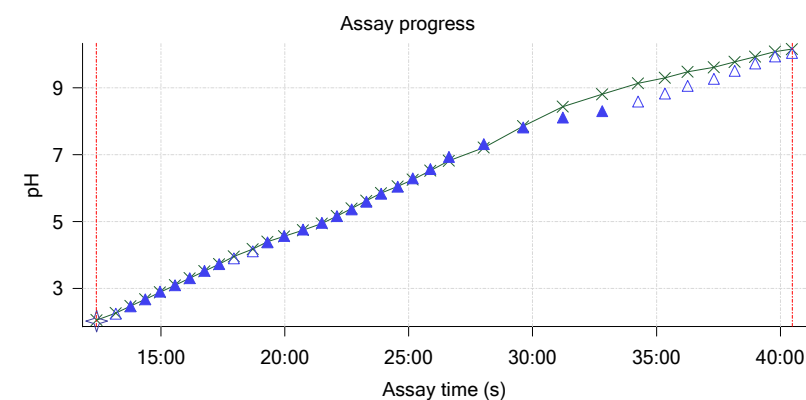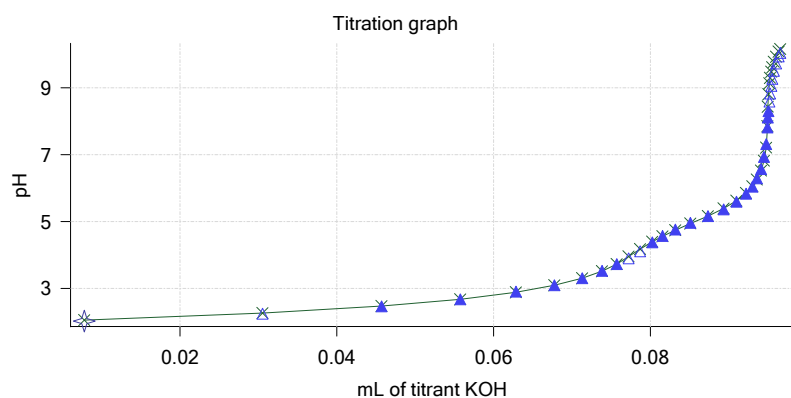

Sample name: **M15\_octanol**  
 Assay name: **pH-metric high logP**  
 Assay ID: **18C-01005**  
 Filename: **C:\Sirius\_T3\Mehtap\20180228\_exp28\_logP\_T3-2\18C-01005\_M15\_octanol\_pH-metric high logP.t3r**

Experiment start time: **3/1/2018 6:16:08 AM**  
 Analyst: **Pion**  
 Instrument ID: **T312060**

## Other graphs (continued)

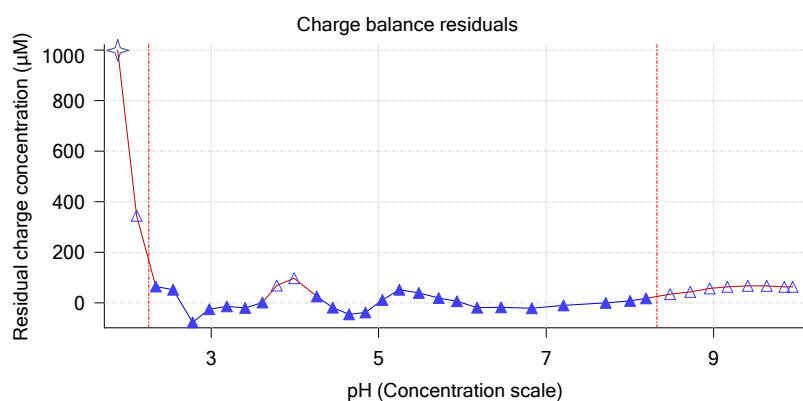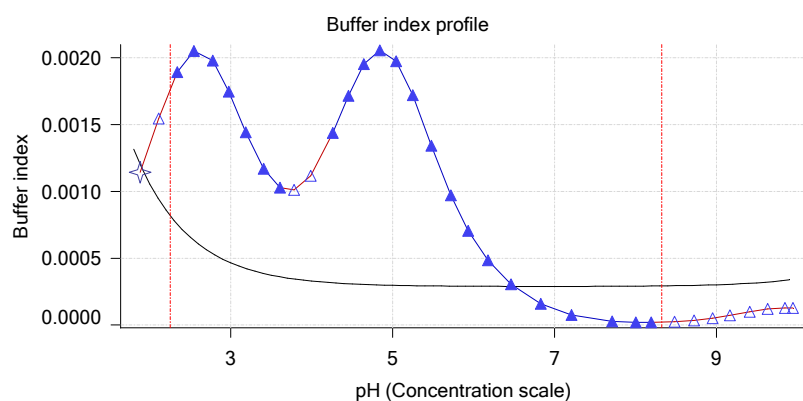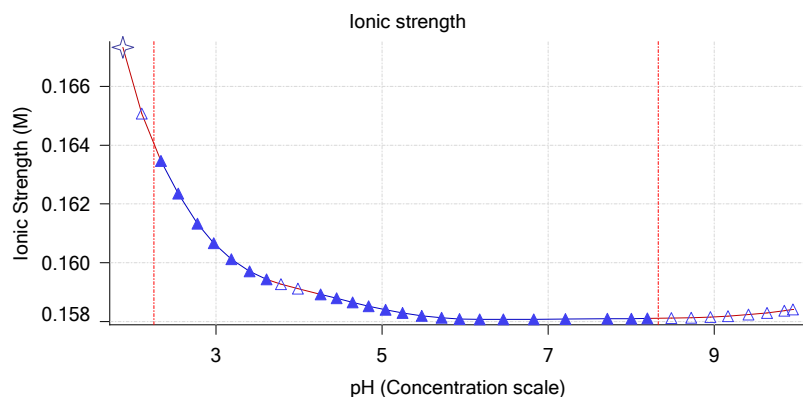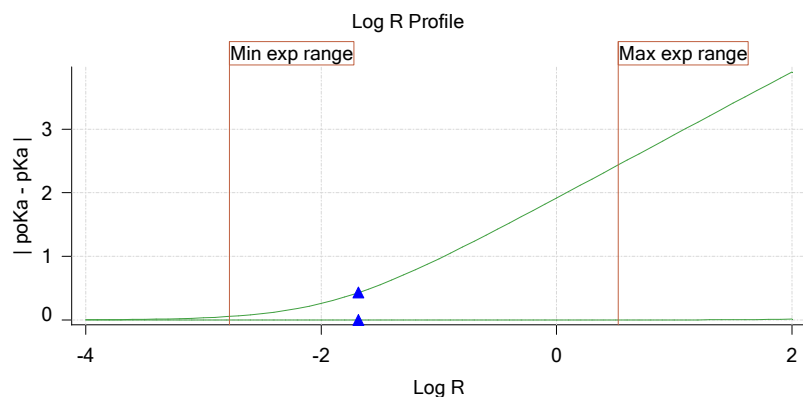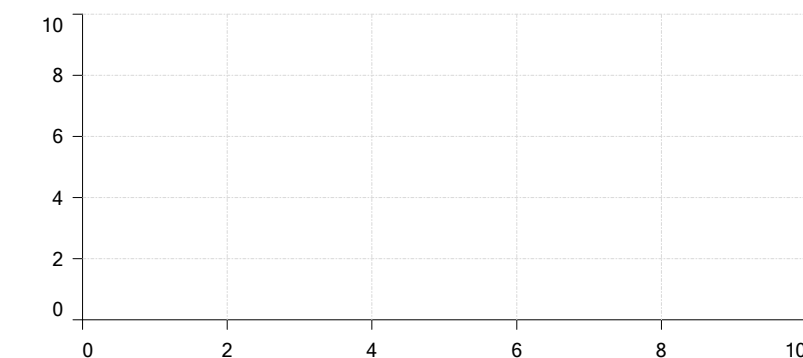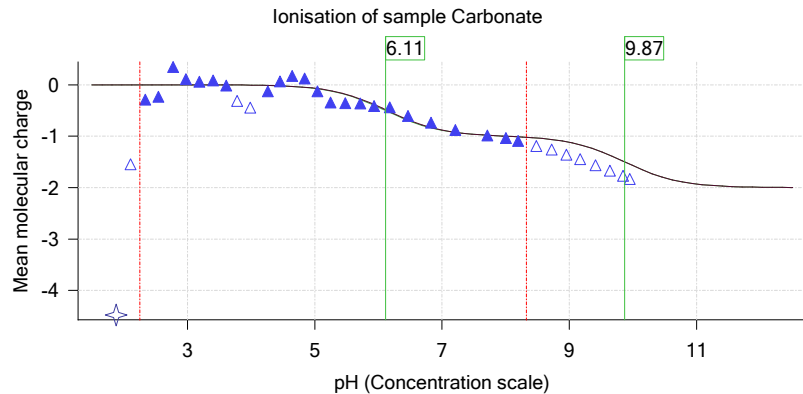

Sample name: **M15\_octanol**  
 Assay name: **pH-metric high logP**  
 Assay ID: **18C-01005**  
 Filename: **C:\Sirius\_T3\Mehtap\20180228\_exp28\_logP\_T3-2\18C-01005\_M15\_octanol\_pH-metric high logP.t3r**

Experiment start time: **3/1/2018 6:16:08 AM**  
 Analyst: **Pion**  
 Instrument ID: **T312060**

## pH-metric high logP Titration 2 of 3 18C-01005 Points 36 to 71

### Overall results

RMSD 0.148  
 Average ionic strength 0.166 M  
 Average temperature 25.0°C  
 Partition ratio 0.0576 : 1  
 Analyte concentration range 3420.0 µM to 3556.1 µM  
 Total points considered 27 of 36

### Warnings and errors

Errors None  
 Warnings One or more logP values out of range

### Four-Plus parameters

Alpha 0.130 3/1/2018 6:16:08 AM C:\Sirius\_T3\HCl18B27.t3r  
 S 0.9970 3/1/2018 6:16:08 AM C:\Sirius\_T3\HCl18B27.t3r  
 jH 0.8 3/1/2018 6:16:08 AM C:\Sirius\_T3\HCl18B27.t3r  
 jOH -0.4 3/1/2018 6:16:08 AM C:\Sirius\_T3\HCl18B27.t3r

### Titrants

0.50 M HCl 0.993513 3/1/2018 6:16:08 AM C:\Sirius\_T3\HCl18B27.t3r  
 0.50 M KOH 0.999845 3/1/2018 6:16:08 AM C:\Sirius\_T3\KOH18B27.t3r

### Sample

M15\_octanol concentration factor 0.909  
 Base pKa 1 2.58  
 Base pKa 2 5.30  
 logP (XH2 2+) -5.50  
 logP (XH +) -4.43  
 logP (neutral X) 1.93

### Sample graphs

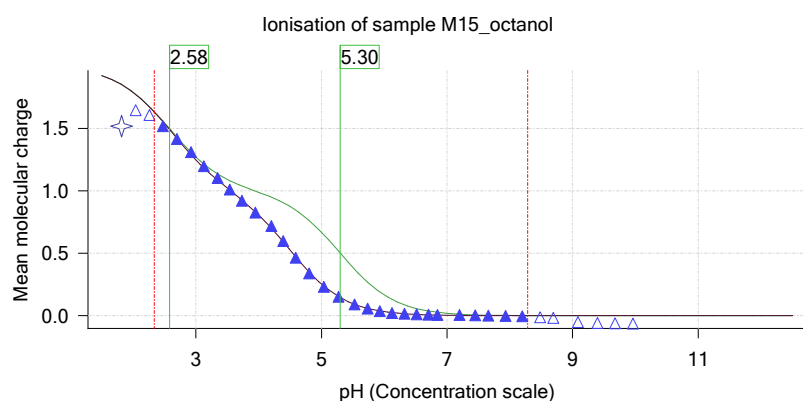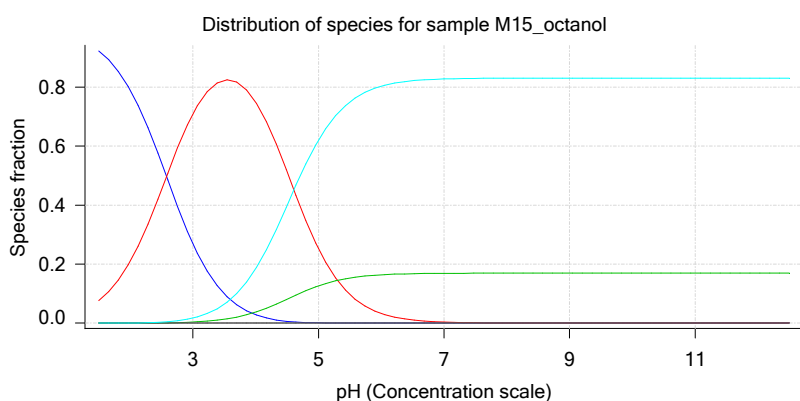

Sample name: **M15\_octanol**  
 Assay name: **pH-metric high logP**  
 Assay ID: **18C-01005**  
 Filename: **C:\Sirius\_T3\Mehtap\20180228\_exp28\_logP\_T3-2\18C-01005\_M15\_octanol\_pH-metric high logP.t3r**

Experiment start time: **3/1/2018 6:16:08 AM**  
 Analyst: **Pion**  
 Instrument ID: **T312060**

## Sample graphs (continued)

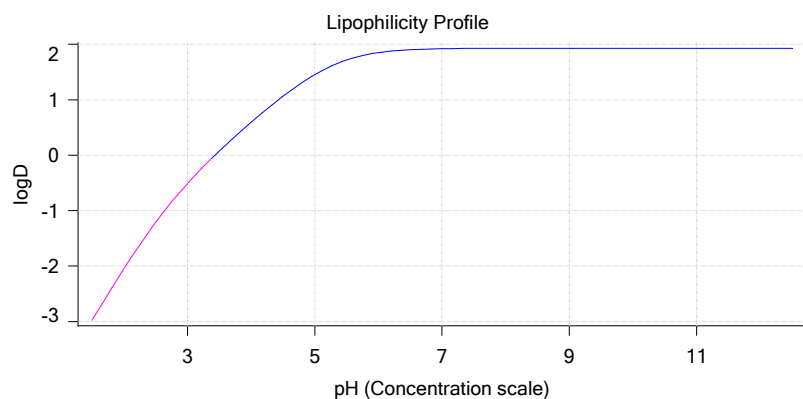

## Sample logD and percent species

| pH     | M15_octanol<br>logD | M15_octanol<br>M15_octanolH2 | M15_octanol<br>M15_octanolH | M15_octanol<br>M15_octanol | M15_octanol<br>M15_octanolH2* | M15_octanol<br>M15_octanolH* | M15_octanol<br>M15_octanol* | Comment       |
|--------|---------------------|------------------------------|-----------------------------|----------------------------|-------------------------------|------------------------------|-----------------------------|---------------|
| 1.000  | -3.95               | 97.44 %                      | 2.56 %                      | 0.00 %                     | 0.00 %                        | 0.00 %                       | 0.00 %                      | Stomach<br>pH |
| 1.200  | -3.56               | 96.00 %                      | 4.00 %                      | 0.00 %                     | 0.00 %                        | 0.00 %                       | 0.00 %                      |               |
| 2.000  | -2.05               | 79.13 %                      | 20.81 %                     | 0.01 %                     | 0.00 %                        | 0.00 %                       | 0.05 %                      |               |
| 3.000  | -0.51               | 26.97 %                      | 70.93 %                     | 0.36 %                     | 0.00 %                        | 0.00 %                       | 1.74 %                      | Blood<br>pH   |
| 4.000  | 0.59                | 2.85 %                       | 74.97 %                     | 3.76 %                     | 0.00 %                        | 0.00 %                       | 18.42 %                     |               |
| 5.000  | 1.45                | 0.10 %                       | 25.24 %                     | 12.65 %                    | 0.00 %                        | 0.00 %                       | 62.01 %                     |               |
| 6.000  | 1.85                | 0.00 %                       | 3.27 %                      | 16.39 %                    | 0.00 %                        | 0.00 %                       | 80.34 %                     |               |
| 6.500  | 1.90                | 0.00 %                       | 1.06 %                      | 16.76 %                    | 0.00 %                        | 0.00 %                       | 82.18 %                     |               |
| 7.000  | 1.92                | 0.00 %                       | 0.34 %                      | 16.89 %                    | 0.00 %                        | 0.00 %                       | 82.78 %                     |               |
| 7.400  | 1.93                | 0.00 %                       | 0.13 %                      | 16.92 %                    | 0.00 %                        | 0.00 %                       | 82.94 %                     |               |
| 8.000  | 1.93                | 0.00 %                       | 0.03 %                      | 16.94 %                    | 0.00 %                        | 0.00 %                       | 83.03 %                     |               |
| 9.000  | 1.93                | 0.00 %                       | 0.00 %                      | 16.94 %                    | 0.00 %                        | 0.00 %                       | 83.05 %                     |               |
| 10.000 | 1.93                | 0.00 %                       | 0.00 %                      | 16.94 %                    | 0.00 %                        | 0.00 %                       | 83.06 %                     |               |
| 11.000 | 1.93                | 0.00 %                       | 0.00 %                      | 16.94 %                    | 0.00 %                        | 0.00 %                       | 83.06 %                     |               |
| 12.000 | 1.93                | 0.00 %                       | 0.00 %                      | 16.94 %                    | 0.00 %                        | 0.00 %                       | 83.06 %                     |               |

## Carbonate and acidity

Carbonate 0.184 mM  
 Acidity error -0.210 mM

## Other graphs

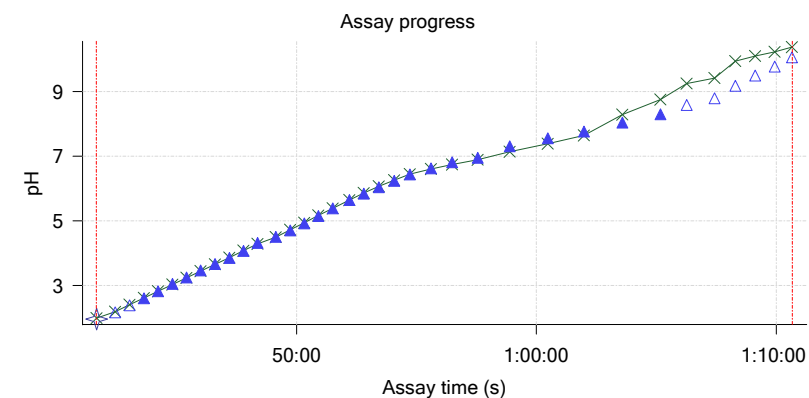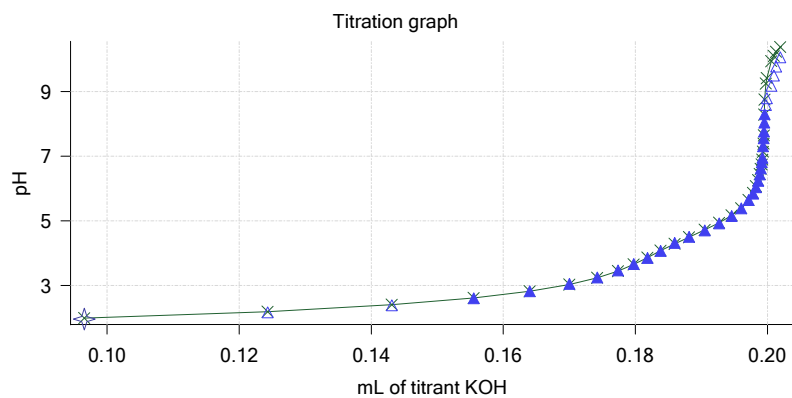



Sample name: **M15\_octanol**  
 Assay name: **pH-metric high logP**  
 Assay ID: **18C-01005**  
 Filename: **C:\Sirius\_T3\Mehtap\20180228\_exp28\_logP\_T3-2\18C-01005\_M15\_octanol\_pH-metric high logP.t3r**

Experiment start time: **3/1/2018 6:16:08 AM**  
 Analyst: **Pion**  
 Instrument ID: **T312060**

## Other graphs (continued)

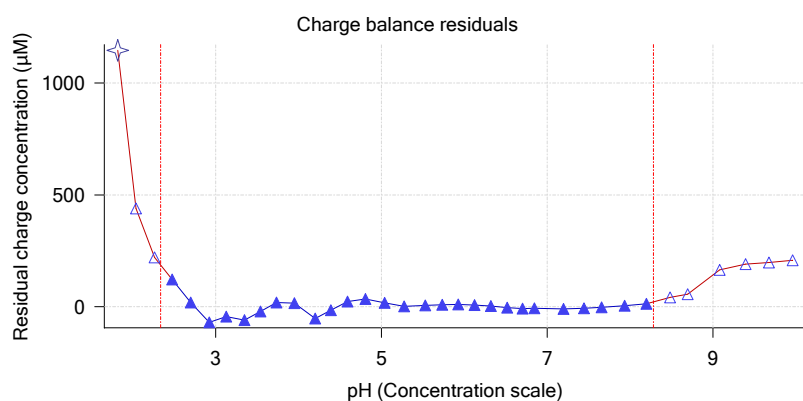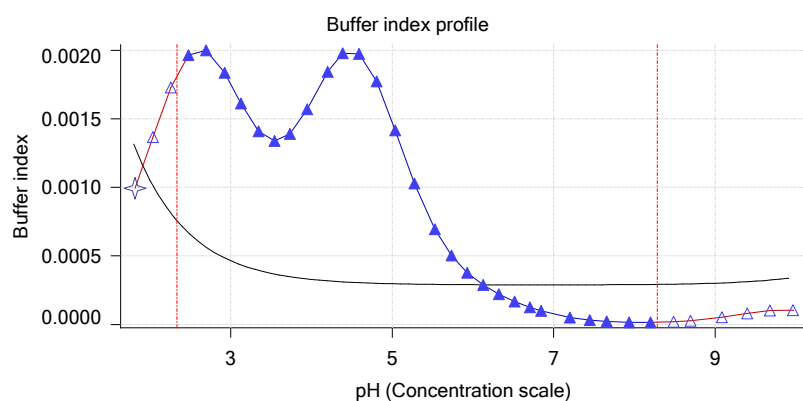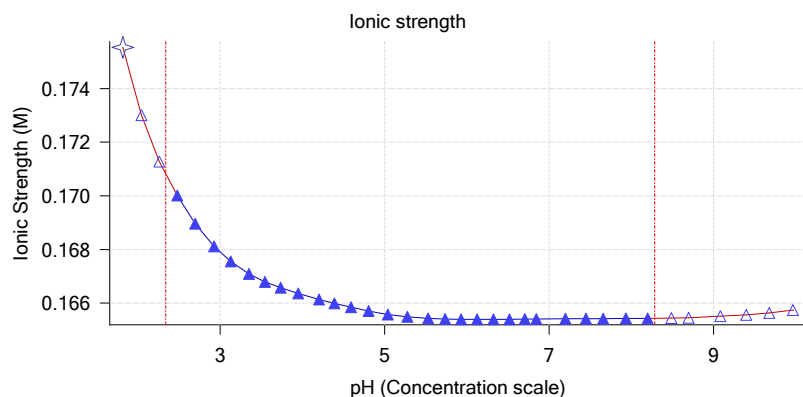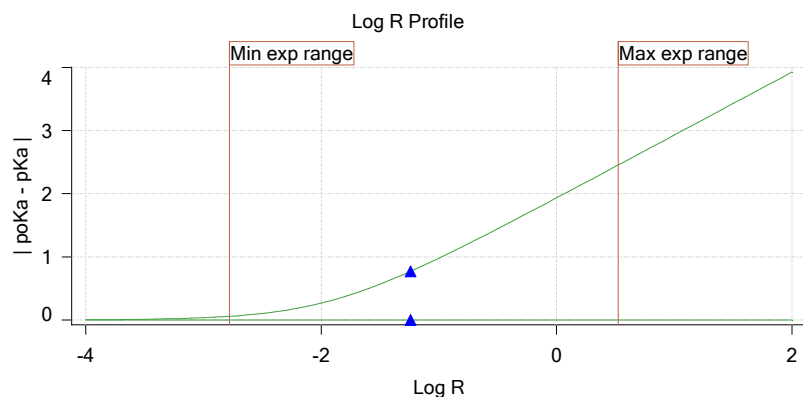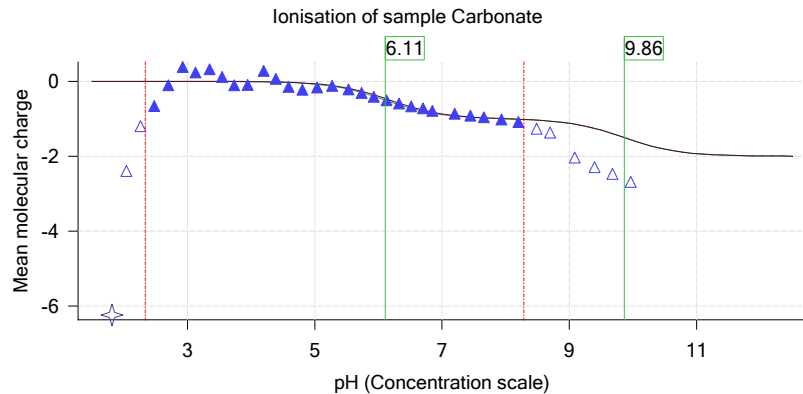

Sample name: **M15\_octanol**  
 Assay name: **pH-metric high logP**  
 Assay ID: **18C-01005**  
 Filename: **C:\Sirius\_T3\Mehtap\20180228\_exp28\_logP\_T3-2\18C-01005\_M15\_octanol\_pH-metric high logP.t3r**

Experiment start time: **3/1/2018 6:16:08 AM**  
 Analyst: **Pion**  
 Instrument ID: **T312060**

pH-metric high logP Titration 3 of 3 18C-01005 Points 72 to 105

## Overall results

RMSD 0.401  
 Average ionic strength 0.172 M  
 Average temperature 25.0°C  
 Partition ratio 0.1600 : 1  
 Analyte concentration range 2881.0 µM to 2978.5 µM  
 Total points considered 21 of 34

## Warnings and errors

Errors None  
 Warnings One or more logP values out of range

## Four-Plus parameters

Alpha 0.130 3/1/2018 6:16:08 AM C:\Sirius\_T3\HCl18B27.t3r  
 S 0.9970 3/1/2018 6:16:08 AM C:\Sirius\_T3\HCl18B27.t3r  
 jH 0.8 3/1/2018 6:16:08 AM C:\Sirius\_T3\HCl18B27.t3r  
 jOH -0.4 3/1/2018 6:16:08 AM C:\Sirius\_T3\HCl18B27.t3r

## Titrants

0.50 M HCl 0.993513 3/1/2018 6:16:08 AM C:\Sirius\_T3\HCl18B27.t3r  
 0.50 M KOH 0.999845 3/1/2018 6:16:08 AM C:\Sirius\_T3\KOH18B27.t3r

## Sample

M15\_octanol concentration factor 0.947  
 Base pKa 1 2.58  
 Base pKa 2 5.30  
 logP (XH2 2+) -5.50  
 logP (XH +) -0.01  
 logP (neutral X) 1.92

## Sample graphs

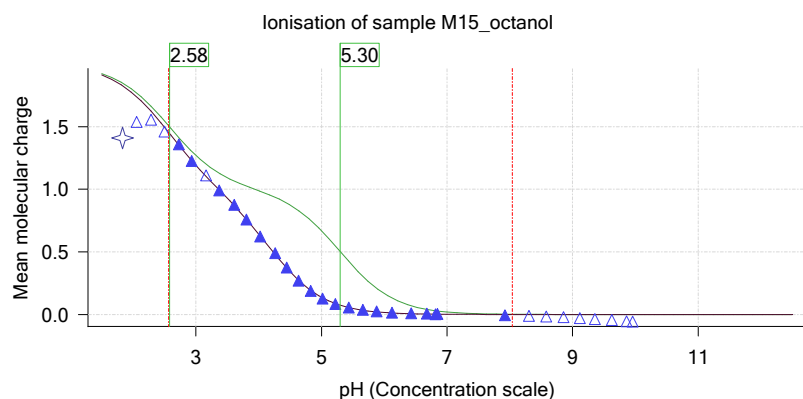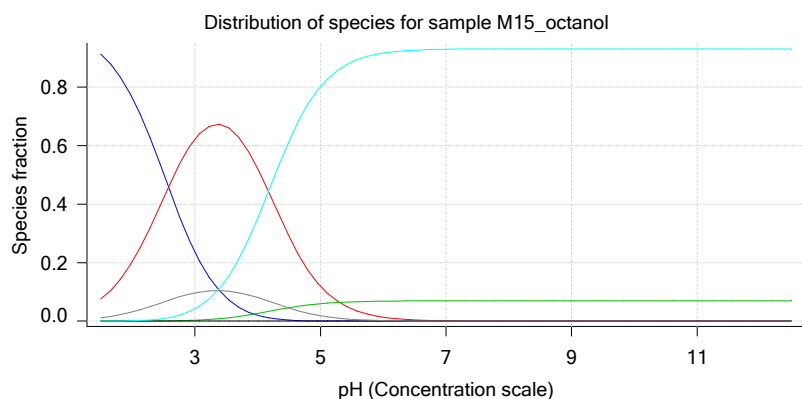

Sample name: **M15\_octanol**  
 Assay name: **pH-metric high logP**  
 Assay ID: **18C-01005**  
 Filename: **C:\Sirius\_T3\Mehtap\20180228\_exp28\_logP\_T3-2\18C-01005\_M15\_octanol\_pH-metric high logP.t3r**

Experiment start time: **3/1/2018 6:16:08 AM**  
 Analyst: **Pion**  
 Instrument ID: **T312060**

## Sample graphs (continued)

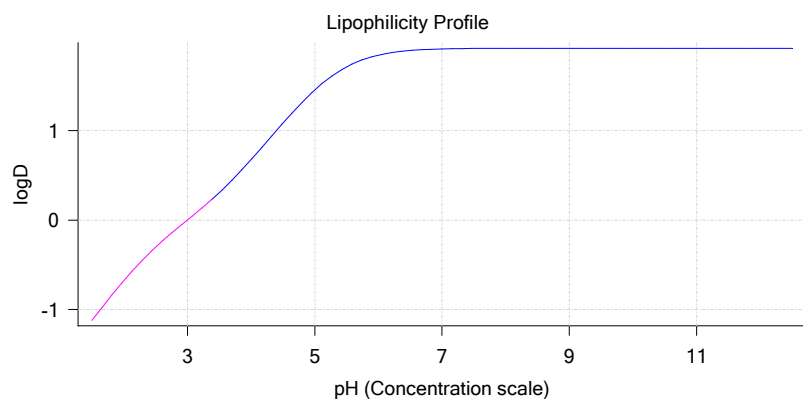

## Sample logD and percent species

| pH     | M15_octanol<br>logD | M15_octanol<br>M15_octanolH2 | M15_octanol<br>M15_octanolH | M15_octanol<br>M15_octanol | M15_octanol<br>M15_octanolH2* | M15_octanol<br>M15_octanolH* | M15_octanol<br>M15_octanol* | Comment       |
|--------|---------------------|------------------------------|-----------------------------|----------------------------|-------------------------------|------------------------------|-----------------------------|---------------|
| 1.000  | -1.60               | 97.05 %                      | 2.55 %                      | 0.00 %                     | 0.00 %                        | 0.40 %                       | 0.00 %                      | Stomach<br>pH |
| 1.200  | -1.41               | 95.40 %                      | 3.98 %                      | 0.00 %                     | 0.00 %                        | 0.62 %                       | 0.00 %                      |               |
| 2.000  | -0.68               | 76.59 %                      | 20.15 %                     | 0.01 %                     | 0.00 %                        | 3.12 %                       | 0.14 %                      |               |
| 3.000  | 0.00                | 23.66 %                      | 62.22 %                     | 0.31 %                     | 0.00 %                        | 9.63 %                       | 4.18 %                      | Blood pH      |
| 4.000  | 0.68                | 1.99 %                       | 52.22 %                     | 2.62 %                     | 0.00 %                        | 8.08 %                       | 35.10 %                     |               |
| 5.000  | 1.46                | 0.05 %                       | 11.93 %                     | 5.98 %                     | 0.00 %                        | 1.85 %                       | 80.20 %                     |               |
| 6.000  | 1.85                | 0.00 %                       | 1.36 %                      | 6.83 %                     | 0.00 %                        | 0.21 %                       | 91.60 %                     |               |
| 6.500  | 1.90                | 0.00 %                       | 0.44 %                      | 6.90 %                     | 0.00 %                        | 0.07 %                       | 92.59 %                     |               |
| 7.000  | 1.91                | 0.00 %                       | 0.14 %                      | 6.93 %                     | 0.00 %                        | 0.02 %                       | 92.91 %                     |               |
| 7.400  | 1.92                | 0.00 %                       | 0.06 %                      | 6.93 %                     | 0.00 %                        | 0.01 %                       | 93.00 %                     |               |
| 8.000  | 1.92                | 0.00 %                       | 0.01 %                      | 6.94 %                     | 0.00 %                        | 0.00 %                       | 93.05 %                     |               |
| 9.000  | 1.92                | 0.00 %                       | 0.00 %                      | 6.94 %                     | 0.00 %                        | 0.00 %                       | 93.06 %                     |               |
| 10.000 | 1.92                | 0.00 %                       | 0.00 %                      | 6.94 %                     | 0.00 %                        | 0.00 %                       | 93.06 %                     |               |
| 11.000 | 1.92                | 0.00 %                       | 0.00 %                      | 6.94 %                     | 0.00 %                        | 0.00 %                       | 93.06 %                     |               |
| 12.000 | 1.92                | 0.00 %                       | 0.00 %                      | 6.94 %                     | 0.00 %                        | 0.00 %                       | 93.06 %                     |               |

## Carbonate and acidity

Carbonate 0.052 mM  
 Acidity error -0.059 mM

## Other graphs

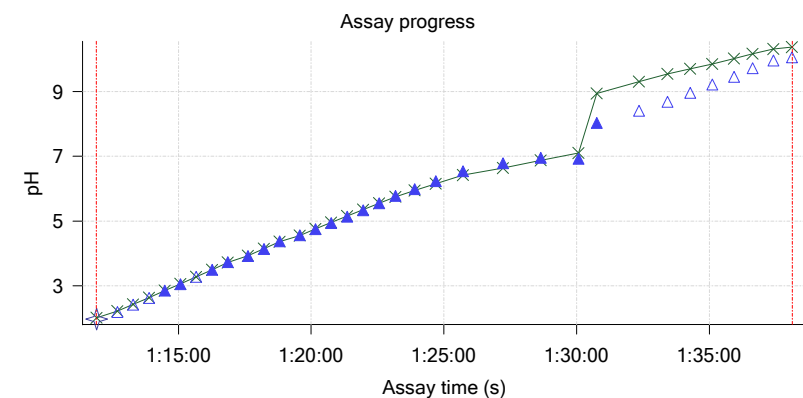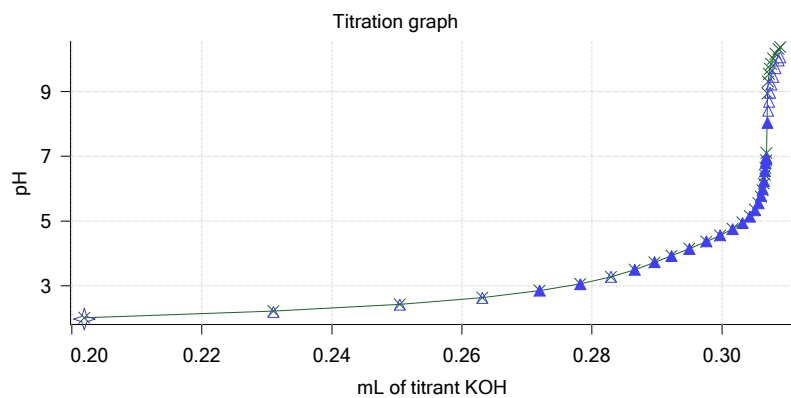

Sample name: **M15\_octanol**  
 Assay name: **pH-metric high logP**  
 Assay ID: **18C-01005**  
 Filename: **C:\Sirius\_T3\Mehtap\20180228\_exp28\_logP\_T3-2\18C-01005\_M15\_octanol\_pH-metric high logP.t3r**

Experiment start time: **3/1/2018 6:16:08 AM**  
 Analyst: **Pion**  
 Instrument ID: **T312060**

## Other graphs (continued)

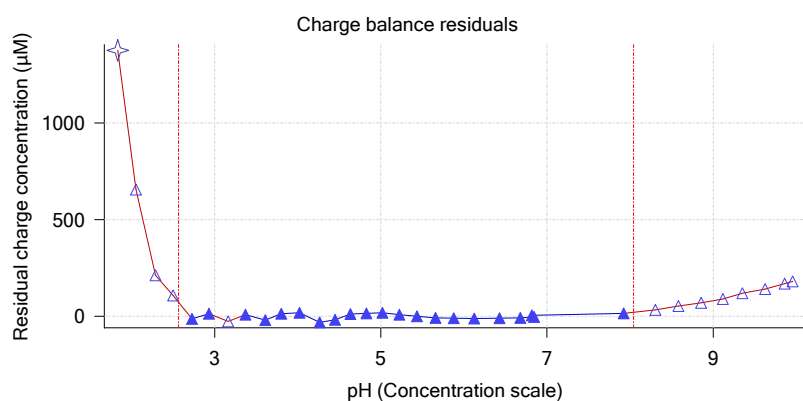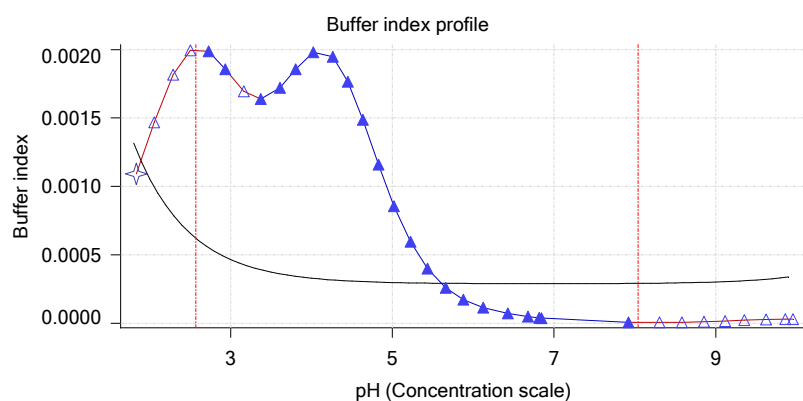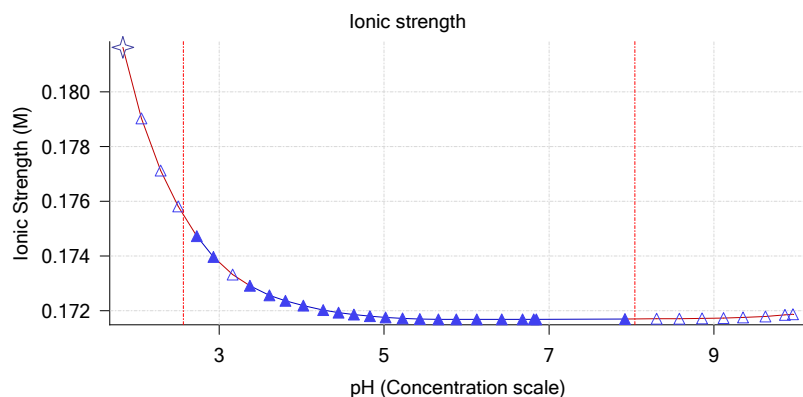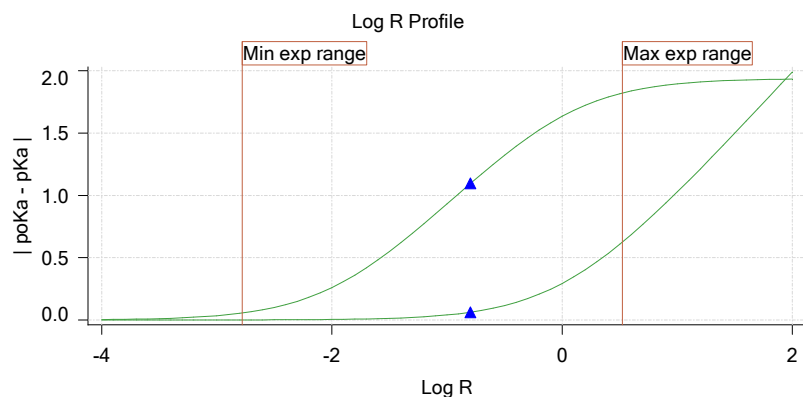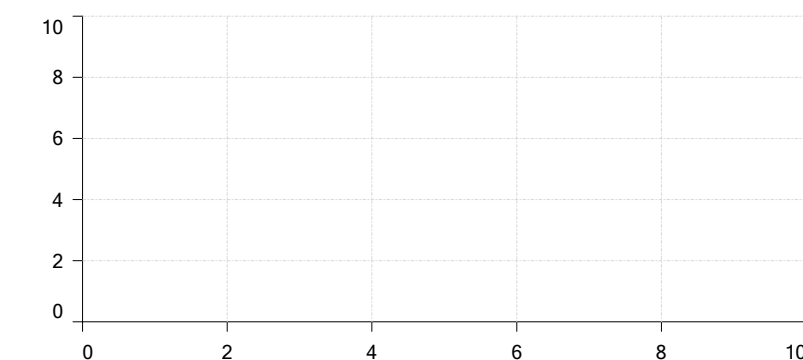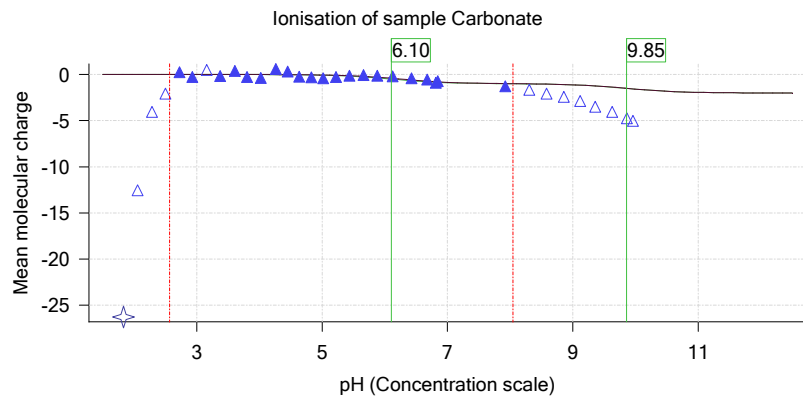

Sample name: **M15\_octanol**  
 Assay name: **pH-metric high logP**  
 Assay ID: **18C-01005**  
 Filename: **C:\Sirius\_T3\Mehtap\20180228\_exp28\_logP\_T3-2\18C-01005\_M15\_octanol\_pH-metric high logP.t3r**

Experiment start time: **3/1/2018 6:16:08 AM**  
 Analyst: **Pion**  
 Instrument ID: **T312060**

## Assay Model

| Settings                          | Value        | Date/Time changed    | Imported from      |
|-----------------------------------|--------------|----------------------|--------------------|
| Sample name                       | M15_octanol  | 2/27/2018 5:03:03 PM | User entered value |
| Sample by                         | Weight       |                      | Default value      |
| Sample weight                     | 0.001970 g   | 2/28/2018 4:25:24 PM | User entered value |
| Formula weight                    | 209.25 g/mol | 2/27/2018 5:03:03 PM | User entered value |
| Solubility                        | Unknown      |                      | Default value      |
| Molecular weight                  | 209.25       | 2/27/2018 5:03:03 PM | User entered value |
| Individual pKa ionic environments | No           |                      | Default value      |
| Number of pKas                    | 2            | 2/27/2018 5:03:03 PM | User entered value |
| Sample is a                       | Base         | 2/27/2018 5:03:03 PM | User entered value |
| pKa 1                             | 2.58         | 2/27/2018 5:03:03 PM | User entered value |
| pKa 2                             | 5.30         | 2/27/2018 5:03:03 PM | User entered value |
| logP (XH2 2+)                     | -5.50        | 2/28/2018 2:10:35 PM | User entered value |
| logp (XH +)                       | -4.96        | 2/28/2018 2:10:28 PM | User entered value |
| logP (neutral X)                  | 1.92         | 2/28/2018 2:10:15 PM | User entered value |

## Events

| Time    | Event             | Water      | Acid       | Base       | Octanol    | pH     | dpH/dt   | pH R-squared | pH SD   | dpH/dt time         |
|---------|-------------------|------------|------------|------------|------------|--------|----------|--------------|---------|---------------------|
| 9:23.6  | Initial pH = 7.47 |            |            |            |            |        |          |              |         |                     |
| 12:24.5 | Data point 1      | 2.20002 mL | 0.09563 mL | 0.00778 mL | 0.05000 mL | 2.016  | 0.00623  | 0.50576      | 0.00043 | 10.0 s              |
| 13:10.8 | Data point 2      | 2.20002 mL | 0.09563 mL | 0.03050 mL | 0.05000 mL | 2.239  | -0.00953 | 0.35232      | 0.00079 | 10.0 s              |
| 13:46.7 | Data point 3      | 2.20002 mL | 0.09563 mL | 0.04570 mL | 0.05000 mL | 2.464  | -0.00246 | 0.19027      | 0.00028 | 10.0 s              |
| 14:22.3 | Data point 4      | 2.20002 mL | 0.09563 mL | 0.05576 mL | 0.05000 mL | 2.670  | 0.01234  | 0.53634      | 0.00083 | 10.0 s              |
| 14:58.0 | Data point 5      | 2.20002 mL | 0.09563 mL | 0.06286 mL | 0.05000 mL | 2.900  | 0.00043  | 0.01947      | 0.00015 | 10.5 s              |
| 15:34.0 | Data point 6      | 2.20002 mL | 0.09563 mL | 0.06776 mL | 0.05000 mL | 3.097  | -0.00497 | 0.18772      | 0.00057 | 10.0 s              |
| 16:09.5 | Data point 7      | 2.20002 mL | 0.09563 mL | 0.07131 mL | 0.05000 mL | 3.307  | -0.00870 | 0.18868      | 0.00099 | 10.0 s              |
| 16:45.1 | Data point 8      | 2.20002 mL | 0.09563 mL | 0.07385 mL | 0.05000 mL | 3.525  | -0.00071 | 0.08489      | 0.00012 | 10.5 s              |
| 17:21.0 | Data point 9      | 2.20002 mL | 0.09563 mL | 0.07571 mL | 0.05000 mL | 3.728  | -0.00085 | 0.13611      | 0.00011 | 10.0 s              |
| 17:56.5 | Data point 10     | 2.20002 mL | 0.09563 mL | 0.07723 mL | 0.05000 mL | 3.901  | -0.00101 | 0.13288      | 0.00014 | 10.0 s              |
| 18:42.4 | Data point 11     | 2.20002 mL | 0.09563 mL | 0.07869 mL | 0.05000 mL | 4.105  | -0.00256 | 0.29892      | 0.00023 | 10.0 s              |
| 19:17.9 | Data point 12     | 2.20002 mL | 0.09563 mL | 0.08022 mL | 0.05000 mL | 4.378  | -0.00592 | 0.25762      | 0.00058 | 10.0 s              |
| 19:58.5 | Data point 13     | 2.20002 mL | 0.09563 mL | 0.08154 mL | 0.05000 mL | 4.569  | -0.00172 | 0.03384      | 0.00046 | 10.0 s              |
| 20:44.3 | Data point 14     | 2.20002 mL | 0.09563 mL | 0.08316 mL | 0.05000 mL | 4.761  | -0.00067 | 0.00810      | 0.00037 | 10.0 s              |
| 21:30.1 | Data point 15     | 2.20002 mL | 0.09563 mL | 0.08511 mL | 0.05000 mL | 4.956  | -0.00175 | 0.25727      | 0.00017 | 10.5 s              |
| 22:06.1 | Data point 16     | 2.20002 mL | 0.09563 mL | 0.08732 mL | 0.05000 mL | 5.158  | -0.00440 | 0.41157      | 0.00034 | 10.0 s              |
| 22:41.6 | Data point 17     | 2.20002 mL | 0.09563 mL | 0.08935 mL | 0.05000 mL | 5.362  | 0.00350  | 0.06911      | 0.00066 | 10.5 s              |
| 23:17.6 | Data point 18     | 2.20002 mL | 0.09563 mL | 0.09099 mL | 0.05000 mL | 5.592  | -0.01026 | 0.39926      | 0.00080 | 10.0 s              |
| 23:53.0 | Data point 19     | 2.20002 mL | 0.09563 mL | 0.09222 mL | 0.05000 mL | 5.831  | -0.00232 | 0.01329      | 0.00099 | 10.0 s              |
| 24:33.6 | Data point 20     | 2.20002 mL | 0.09563 mL | 0.09302 mL | 0.05000 mL | 6.046  | -0.01229 | 0.83805      | 0.00066 | 10.5 s              |
| 25:09.5 | Data point 21     | 2.20002 mL | 0.09563 mL | 0.09358 mL | 0.05000 mL | 6.288  | -0.01579 | 0.76334      | 0.00089 | 12.5 s              |
| 25:52.6 | Data point 22     | 2.20002 mL | 0.09563 mL | 0.09412 mL | 0.05000 mL | 6.573  | -0.01546 | 0.70398      | 0.00091 | 14.5 s              |
| 26:37.6 | Data point 23     | 2.20002 mL | 0.09563 mL | 0.09450 mL | 0.05000 mL | 6.938  | -0.01891 | 0.87947      | 0.00100 | 48.5 s              |
| 28:01.9 | Data point 24     | 2.20002 mL | 0.09563 mL | 0.09476 mL | 0.05000 mL | 7.316  | -0.02494 | 0.93500      | 0.00127 | Timed out at 59.5 s |
| 29:37.6 | Data point 25     | 2.20002 mL | 0.09563 mL | 0.09492 mL | 0.05000 mL | 7.818  | -0.04146 | 0.96788      | 0.00208 | Timed out at 59.5 s |
| 31:13.2 | Data point 26     | 2.20002 mL | 0.09563 mL | 0.09499 mL | 0.05000 mL | 8.108  | -0.02610 | 0.95271      | 0.00132 | Timed out at 59.5 s |
| 32:48.8 | Data point 27     | 2.20002 mL | 0.09563 mL | 0.09506 mL | 0.05000 mL | 8.299  | -0.01949 | 0.95727      | 0.00098 | 45.5 s              |
| 34:15.2 | Data point 28     | 2.20002 mL | 0.09563 mL | 0.09518 mL | 0.05000 mL | 8.587  | -0.01701 | 0.74040      | 0.00098 | 24.5 s              |
| 35:20.4 | Data point 29     | 2.20002 mL | 0.09563 mL | 0.09527 mL | 0.05000 mL | 8.827  | -0.01958 | 0.96654      | 0.00098 | 19.5 s              |
| 36:15.6 | Data point 30     | 2.20002 mL | 0.09563 mL | 0.09541 mL | 0.05000 mL | 9.056  | -0.01834 | 0.92738      | 0.00094 | 28.0 s              |
| 37:19.3 | Data point 31     | 2.20002 mL | 0.09563 mL | 0.09556 mL | 0.05000 mL | 9.269  | -0.01816 | 0.91609      | 0.00094 | 14.5 s              |
| 38:09.5 | Data point 32     | 2.20002 mL | 0.09563 mL | 0.09577 mL | 0.05000 mL | 9.513  | -0.01968 | 0.96171      | 0.00099 | 14.0 s              |
| 38:59.2 | Data point 33     | 2.20002 mL | 0.09563 mL | 0.09603 mL | 0.05000 mL | 9.735  | -0.01921 | 0.97472      | 0.00096 | 12.5 s              |
| 39:47.4 | Data point 34     | 2.20002 mL | 0.09563 mL | 0.09635 mL | 0.05000 mL | 9.945  | -0.00595 | 0.27714      | 0.00056 | 10.0 s              |
| 40:27.9 | Data point 35     | 2.20002 mL | 0.09563 mL | 0.09657 mL | 0.05000 mL | 10.046 | -0.01774 | 0.92128      | 0.00091 | 10.0 s              |

Sample name: **M15\_octanol**  
 Assay name: **pH-metric high logP**  
 Assay ID: **18C-01005**  
 Filename: **C:\Sirius\_T3\Mehtap\20180228\_exp28\_logP\_T3-2\18C-01005\_M15\_octanol\_pH-metric high logP.t3r**

Experiment start time: **3/1/2018 6:16:08 AM**  
 Analyst: **Pion**  
 Instrument ID: **T312060**

## Events (continued)

| Time      | Event         | Water      | Acid       | Base       | Octanol    | pH     | dpH/dt   | pH R-squared | pH SD   | dpH/dt time         |
|-----------|---------------|------------|------------|------------|------------|--------|----------|--------------|---------|---------------------|
| 41:39.6   | Data point 36 | 2.20002 mL | 0.20089 mL | 0.09657 mL | 0.15000 mL | 1.954  | -0.00850 | 0.92951      | 0.00043 | 10.0 s              |
| 42:26.1   | Data point 37 | 2.20002 mL | 0.20089 mL | 0.12434 mL | 0.15000 mL | 2.171  | 0.00527  | 0.50918      | 0.00036 | 10.0 s              |
| 43:02.0   | Data point 38 | 2.20002 mL | 0.20089 mL | 0.14313 mL | 0.15000 mL | 2.389  | -0.01330 | 0.58147      | 0.00086 | 10.0 s              |
| 43:37.7   | Data point 39 | 2.20002 mL | 0.20089 mL | 0.15550 mL | 0.15000 mL | 2.602  | -0.00134 | 0.03743      | 0.00034 | 10.0 s              |
| 44:13.3   | Data point 40 | 2.20002 mL | 0.20089 mL | 0.16402 mL | 0.15000 mL | 2.821  | -0.00056 | 0.01526      | 0.00022 | 10.0 s              |
| 44:48.9   | Data point 41 | 2.20002 mL | 0.20089 mL | 0.16999 mL | 0.15000 mL | 3.047  | 0.00129  | 0.22583      | 0.00013 | 10.0 s              |
| 45:24.4   | Data point 42 | 2.20002 mL | 0.20089 mL | 0.17420 mL | 0.15000 mL | 3.248  | 0.00052  | 0.05566      | 0.00011 | 10.0 s              |
| 45:59.9   | Data point 43 | 2.20002 mL | 0.20089 mL | 0.17735 mL | 0.15000 mL | 3.468  | -0.00387 | 0.16203      | 0.00047 | 10.0 s              |
| 46:35.4   | Data point 44 | 2.20002 mL | 0.20089 mL | 0.17975 mL | 0.15000 mL | 3.662  | -0.00150 | 0.13762      | 0.00020 | 10.5 s              |
| 47:11.4   | Data point 45 | 2.20002 mL | 0.20089 mL | 0.18182 mL | 0.15000 mL | 3.852  | 0.00050  | 0.03983      | 0.00012 | 10.0 s              |
| 47:46.8   | Data point 46 | 2.20002 mL | 0.20089 mL | 0.18382 mL | 0.15000 mL | 4.067  | -0.00502 | 0.37193      | 0.00041 | 10.0 s              |
| 48:22.3   | Data point 47 | 2.20002 mL | 0.20089 mL | 0.18594 mL | 0.15000 mL | 4.318  | -0.00521 | 0.16247      | 0.00064 | 10.0 s              |
| 49:08.2   | Data point 48 | 2.20002 mL | 0.20089 mL | 0.18812 mL | 0.15000 mL | 4.506  | -0.00615 | 0.38511      | 0.00049 | 10.0 s              |
| 49:43.7   | Data point 49 | 2.20002 mL | 0.20089 mL | 0.19048 mL | 0.15000 mL | 4.707  | -0.00269 | 0.27582      | 0.00025 | 10.0 s              |
| 50:19.1   | Data point 50 | 2.20002 mL | 0.20089 mL | 0.19269 mL | 0.15000 mL | 4.921  | -0.01206 | 0.44085      | 0.00090 | 10.0 s              |
| 50:54.6   | Data point 51 | 2.20002 mL | 0.20089 mL | 0.19457 mL | 0.15000 mL | 5.153  | 0.00999  | 0.53425      | 0.00068 | 10.5 s              |
| 51:30.6   | Data point 52 | 2.20002 mL | 0.20089 mL | 0.19600 mL | 0.15000 mL | 5.389  | -0.01513 | 0.66733      | 0.00091 | 10.5 s              |
| 52:11.7   | Data point 53 | 2.20002 mL | 0.20089 mL | 0.19715 mL | 0.15000 mL | 5.641  | -0.01166 | 0.35160      | 0.00097 | 11.0 s              |
| 52:48.2   | Data point 54 | 2.20002 mL | 0.20089 mL | 0.19781 mL | 0.15000 mL | 5.848  | -0.00111 | 0.00552      | 0.00073 | 12.0 s              |
| 53:25.6   | Data point 55 | 2.20002 mL | 0.20089 mL | 0.19826 mL | 0.15000 mL | 6.041  | -0.01512 | 0.65316      | 0.00092 | 13.0 s              |
| 54:04.0   | Data point 56 | 2.20002 mL | 0.20089 mL | 0.19859 mL | 0.15000 mL | 6.237  | -0.01714 | 0.87476      | 0.00091 | 14.0 s              |
| 54:43.4   | Data point 57 | 2.20002 mL | 0.20089 mL | 0.19882 mL | 0.15000 mL | 6.433  | -0.01867 | 0.91161      | 0.00097 | 27.5 s              |
| 55:36.4   | Data point 58 | 2.20002 mL | 0.20089 mL | 0.19899 mL | 0.15000 mL | 6.627  | -0.01996 | 0.98353      | 0.00099 | 27.0 s              |
| 56:28.8   | Data point 59 | 2.20002 mL | 0.20089 mL | 0.19911 mL | 0.15000 mL | 6.813  | -0.01534 | 0.97399      | 0.00077 | 39.0 s              |
| 57:33.2   | Data point 60 | 2.20002 mL | 0.20089 mL | 0.19920 mL | 0.15000 mL | 6.955  | -0.01953 | 0.94508      | 0.00099 | 49.0 s              |
| 58:52.9   | Data point 61 | 2.20002 mL | 0.20089 mL | 0.19932 mL | 0.15000 mL | 7.307  | -0.03681 | 0.97518      | 0.00184 | Timed out at 59.5 s |
| 1:00:28.6 | Data point 62 | 2.20002 mL | 0.20089 mL | 0.19939 mL | 0.15000 mL | 7.553  | -0.03803 | 0.97454      | 0.00190 | Timed out at 59.5 s |
| 1:01:59.1 | Data point 63 | 2.20002 mL | 0.20089 mL | 0.19944 mL | 0.15000 mL | 7.763  | -0.03211 | 0.96281      | 0.00162 | Timed out at 59.5 s |
| 1:03:34.7 | Data point 64 | 2.20002 mL | 0.20089 mL | 0.19951 mL | 0.15000 mL | 8.039  | -0.02677 | 0.95360      | 0.00135 | Timed out at 59.5 s |
| 1:05:10.3 | Data point 65 | 2.20002 mL | 0.20089 mL | 0.19958 mL | 0.15000 mL | 8.302  | -0.01665 | 0.74155      | 0.00095 | 24.5 s              |
| 1:06:15.7 | Data point 66 | 2.20002 mL | 0.20089 mL | 0.19977 mL | 0.15000 mL | 8.588  | -0.01458 | 0.68624      | 0.00087 | 29.0 s              |
| 1:07:25.6 | Data point 67 | 2.20002 mL | 0.20089 mL | 0.19988 mL | 0.15000 mL | 8.798  | -0.01709 | 0.86919      | 0.00091 | 16.5 s              |
| 1:08:17.8 | Data point 68 | 2.20002 mL | 0.20089 mL | 0.20059 mL | 0.15000 mL | 9.185  | -0.01489 | 0.69562      | 0.00088 | 14.0 s              |
| 1:09:07.5 | Data point 69 | 2.20002 mL | 0.20089 mL | 0.20094 mL | 0.15000 mL | 9.496  | -0.01158 | 0.36700      | 0.00094 | 18.0 s              |
| 1:09:56.1 | Data point 70 | 2.20002 mL | 0.20089 mL | 0.20132 mL | 0.15000 mL | 9.775  | -0.01160 | 0.42092      | 0.00088 | 12.5 s              |
| 1:10:39.2 | Data point 71 | 2.20002 mL | 0.20089 mL | 0.20193 mL | 0.15000 mL | 10.062 | -0.01596 | 0.67334      | 0.00096 | 10.0 s              |
| 1:11:55.5 | Data point 72 | 2.20002 mL | 0.30889 mL | 0.20193 mL | 0.45000 mL | 1.969  | 0.00067  | 0.00237      | 0.00068 | 10.0 s              |
| 1:12:42.0 | Data point 73 | 2.20002 mL | 0.30889 mL | 0.23100 mL | 0.45000 mL | 2.187  | 0.01750  | 0.85670      | 0.00093 | 10.0 s              |
| 1:13:17.9 | Data point 74 | 2.20002 mL | 0.30889 mL | 0.25045 mL | 0.45000 mL | 2.416  | 0.01285  | 0.80261      | 0.00071 | 10.0 s              |
| 1:13:53.6 | Data point 75 | 2.20002 mL | 0.30889 mL | 0.26312 mL | 0.45000 mL | 2.628  | 0.00730  | 0.64955      | 0.00045 | 10.0 s              |
| 1:14:29.3 | Data point 76 | 2.20002 mL | 0.30889 mL | 0.27197 mL | 0.45000 mL | 2.851  | 0.00165  | 0.38392      | 0.00013 | 10.0 s              |
| 1:15:04.8 | Data point 77 | 2.20002 mL | 0.30889 mL | 0.27822 mL | 0.45000 mL | 3.054  | 0.00066  | 0.05640      | 0.00014 | 10.0 s              |
| 1:15:40.4 | Data point 78 | 2.20002 mL | 0.30889 mL | 0.28293 mL | 0.45000 mL | 3.283  | -0.00318 | 0.06439      | 0.00062 | 10.0 s              |
| 1:16:15.9 | Data point 79 | 2.20002 mL | 0.30889 mL | 0.28655 mL | 0.45000 mL | 3.492  | 0.00558  | 0.58627      | 0.00036 | 10.0 s              |
| 1:16:51.4 | Data point 80 | 2.20002 mL | 0.30889 mL | 0.28961 mL | 0.45000 mL | 3.729  | -0.00357 | 0.40444      | 0.00028 | 10.0 s              |
| 1:17:37.3 | Data point 81 | 2.20002 mL | 0.30889 mL | 0.29222 mL | 0.45000 mL | 3.922  | 0.00000  | 0.00000      | 0.00050 | 10.5 s              |
| 1:18:13.3 | Data point 82 | 2.20002 mL | 0.30889 mL | 0.29497 mL | 0.45000 mL | 4.141  | -0.00271 | 0.20156      | 0.00030 | 10.0 s              |
| 1:18:48.8 | Data point 83 | 2.20002 mL | 0.30889 mL | 0.29758 mL | 0.45000 mL | 4.380  | -0.00694 | 0.22006      | 0.00073 | 10.0 s              |
| 1:19:34.6 | Data point 84 | 2.20002 mL | 0.30889 mL | 0.29972 mL | 0.45000 mL | 4.565  | 0.00192  | 0.03274      | 0.00052 | 10.0 s              |
| 1:20:10.1 | Data point 85 | 2.20002 mL | 0.30889 mL | 0.30165 mL | 0.45000 mL | 4.750  | -0.00572 | 0.22132      | 0.00060 | 10.0 s              |
| 1:20:45.6 | Data point 86 | 2.20002 mL | 0.30889 mL | 0.30315 mL | 0.45000 mL | 4.943  | -0.00051 | 0.00238      | 0.00052 | 10.5 s              |
| 1:21:21.6 | Data point 87 | 2.20002 mL | 0.30889 mL | 0.30428 mL | 0.45000 mL | 5.134  | -0.00660 | 0.13315      | 0.00089 | 10.5 s              |
| 1:21:57.5 | Data point 88 | 2.20002 mL | 0.30889 mL | 0.30508 mL | 0.45000 mL | 5.338  | -0.00192 | 0.01187      | 0.00087 | 11.0 s              |



## Assay Events

Sample name: **M15\_octanol**  
Assay name: **pH-metric high logP**  
Assay ID: **18C-01005**  
Filename: **C:\Sirius\_T3\Mehtap\20180228\_exp28\_logP\_T3-2\18C-01005\_M15\_octanol\_pH-metric high logP.t3r**

Experiment start time: **3/1/2018 6:16:08 AM**  
Analyst: **Pion**  
Instrument ID: **T312060**

## Events (continued)

| Time      | Event          | Water      | Acid       | Base       | Octanol    | pH     | dpH/dt   | pH R-squared | pH SD   | dpH/dt time         |
|-----------|----------------|------------|------------|------------|------------|--------|----------|--------------|---------|---------------------|
| 1:22:33.9 | Data point 89  | 2.20002 mL | 0.30889 mL | 0.30562 mL | 0.45000 mL | 5.547  | -0.00385 | 0.05953      | 0.00078 | 11.5 s              |
| 1:23:10.9 | Data point 90  | 2.20002 mL | 0.30889 mL | 0.30600 mL | 0.45000 mL | 5.773  | -0.01234 | 0.38543      | 0.00098 | 18.0 s              |
| 1:23:54.3 | Data point 91  | 2.20002 mL | 0.30889 mL | 0.30626 mL | 0.45000 mL | 5.990  | -0.01294 | 0.62761      | 0.00081 | 22.0 s              |
| 1:24:41.7 | Data point 92  | 2.20002 mL | 0.30889 mL | 0.30644 mL | 0.45000 mL | 6.237  | -0.01660 | 0.92533      | 0.00085 | 30.5 s              |
| 1:25:42.9 | Data point 93  | 2.20002 mL | 0.30889 mL | 0.30661 mL | 0.45000 mL | 6.538  | -0.02270 | 0.93887      | 0.00116 | Timed out at 59.5 s |
| 1:27:13.4 | Data point 94  | 2.20002 mL | 0.30889 mL | 0.30670 mL | 0.45000 mL | 6.787  | -0.03247 | 0.95665      | 0.00164 | Timed out at 59.5 s |
| 1:28:38.8 | Data point 95  | 2.20002 mL | 0.30889 mL | 0.30677 mL | 0.45000 mL | 6.955  | -0.02853 | 0.95075      | 0.00145 | Timed out at 59.5 s |
| 1:30:04.2 | Data point 96  | 2.20002 mL | 0.30889 mL | 0.30682 mL | 0.45000 mL | 6.926  | -0.00738 | 0.28183      | 0.00069 | 10.5 s              |
| 1:30:45.2 | Data point 97  | 2.20002 mL | 0.30889 mL | 0.30699 mL | 0.45000 mL | 8.028  | -0.06462 | 0.99131      | 0.00321 | Timed out at 59.5 s |
| 1:32:20.9 | Data point 98  | 2.20002 mL | 0.30889 mL | 0.30710 mL | 0.45000 mL | 8.410  | -0.01600 | 0.62423      | 0.00100 | 23.5 s              |
| 1:33:25.2 | Data point 99  | 2.20002 mL | 0.30889 mL | 0.30724 mL | 0.45000 mL | 8.685  | -0.01186 | 0.41042      | 0.00092 | 15.5 s              |
| 1:34:16.4 | Data point 100 | 2.20002 mL | 0.30889 mL | 0.30739 mL | 0.45000 mL | 8.958  | -0.00728 | 0.18983      | 0.00082 | 14.5 s              |
| 1:35:06.5 | Data point 101 | 2.20002 mL | 0.30889 mL | 0.30757 mL | 0.45000 mL | 9.218  | -0.01378 | 0.67757      | 0.00083 | 13.0 s              |
| 1:35:55.3 | Data point 102 | 2.20002 mL | 0.30889 mL | 0.30785 mL | 0.45000 mL | 9.455  | -0.01183 | 0.35300      | 0.00098 | 11.5 s              |
| 1:36:37.4 | Data point 103 | 2.20002 mL | 0.30889 mL | 0.30821 mL | 0.45000 mL | 9.725  | -0.00923 | 0.21248      | 0.00099 | 11.5 s              |
| 1:37:24.7 | Data point 104 | 2.20002 mL | 0.30889 mL | 0.30870 mL | 0.45000 mL | 9.960  | -0.01830 | 0.91815      | 0.00094 | 11.0 s              |
| 1:38:06.3 | Data point 105 | 2.20002 mL | 0.30889 mL | 0.30896 mL | 0.45000 mL | 10.057 | -0.01398 | 0.91248      | 0.00072 | 10.5 s              |
| 1:38:25.8 | Assay volumes  | 2.20002 mL | 0.30889 mL | 0.30896 mL | 0.45000 mL |        |          |              |         |                     |



Sample name: **M15\_octanol**  
 Assay name: **pH-metric high logP**  
 Assay ID: **18C-01005**  
 Filename: **C:\Sirius\_T3\Mehtap\20180228\_exp28\_logP\_T3-2\18C-01005\_M15\_octanol\_pH-metric high logP.t3r**

Experiment start time: **3/1/2018 6:16:08 AM**  
 Analyst: **Pion**  
 Instrument ID: **T312060**

## Assay Settings

| Setting                             | Value              | Original Value | Date/Time changed | Imported from |
|-------------------------------------|--------------------|----------------|-------------------|---------------|
| <b>General Settings</b>             |                    |                |                   |               |
| Analyst name                        | Pion               |                |                   |               |
| <b>Standard Experiment Settings</b> |                    |                |                   |               |
| Number of titrations                | 3                  |                |                   |               |
| Minimum pH                          | 2.000              |                |                   |               |
| Maximum pH                          | 10.000             |                |                   |               |
| pH step between points of           | 0.200              |                |                   |               |
| Minimum titrant addition            | 0.00002 mL         |                |                   |               |
| Maximum titrant addition            | 0.10000 mL         |                |                   |               |
| Argon flow rate                     | 100%               |                |                   |               |
| Start titration using               | Cautious pH adjust |                |                   |               |
| <b>Advanced General Settings</b>    |                    |                |                   |               |
| Detect turbidity using              | None               |                |                   |               |
| Collect turbidity sensor data       | No                 |                |                   |               |
| Collect UV spectra                  | No                 |                |                   |               |
| Stir after titrant addition for     | 5 seconds          |                |                   |               |
| For titrant addition, stir at       | 10%                |                |                   |               |
| <b>Titration Pre-Dose</b>           |                    |                |                   |               |
| Titration pre-dose                  | None               |                |                   |               |
| <b>Assay Medium</b>                 |                    |                |                   |               |
| ISA water volume                    | 2.20 mL            |                |                   |               |
| Water added                         | Automatic          |                |                   |               |
| Partition solvent type              | Octanol            |                |                   |               |
| Partition volume                    | 0.050 mL           |                |                   |               |
| Partition solvent added             | Automatic          |                |                   |               |
| After partition addition, stir for  | 1 seconds          |                |                   |               |
| <b>Sample Sonication</b>            |                    |                |                   |               |
| Sonicate                            | Yes                |                |                   |               |
| Adjust pH for sonication            | No                 |                |                   |               |
| Sonicate for                        | 300 seconds        |                |                   |               |
| After sonication stir for           | 5 seconds          |                |                   |               |
| <b>Sample Dissolution</b>           |                    |                |                   |               |
| Perform a dissolution stage         | Yes                |                |                   |               |
| Adjust and hold pH for dissolution  | To start pH        |                |                   |               |
| Stir to dissolve for                | 120 seconds        |                |                   |               |
| For dissolution, stir at            | 10%                |                |                   |               |
| <b>Carbonate purge</b>              |                    |                |                   |               |
| Perform a carbonate purge           | No                 |                |                   |               |
| <b>Temperature Control</b>          |                    |                |                   |               |
| Wait for temperature                | Yes                |                |                   |               |
| Required start temperature          | 25.0°C             |                |                   |               |
| Acceptable deviation                | 0.5°C              |                |                   |               |
| Time to wait                        | 60 seconds         |                |                   |               |
| Stir speed of                       | 50%                |                |                   |               |
| <b>Titration 1</b>                  |                    |                |                   |               |
| Titrate from                        | Low to high pH     |                |                   |               |
| Adjust to start pH                  | Yes                |                |                   |               |
| After pH adjust stir for            | 30 seconds         |                |                   |               |
| Stir to allow partitioning for      | 15 seconds         |                |                   |               |
| Stirrer speed for partitioning      | 50%                |                |                   |               |
| <b>Titration 2</b>                  |                    |                |                   |               |
| Titrate from                        | Low to high pH     |                |                   |               |
| Add additional water                | 0.00 mL            |                |                   |               |
| Additional partition solvent volume | 0.100 mL           |                |                   |               |
| Additional partition solvent added  | Automatic          |                |                   |               |
| After pH adjust stir for            | 30 seconds         |                |                   |               |
| Stir to allow partitioning for      | 15 seconds         |                |                   |               |
| Stirrer speed for partitioning      | 55%                |                |                   |               |



Sample name: **M15\_octanol**  
 Assay name: **pH-metric high logP**  
 Assay ID: **18C-01005**  
 Filename: **C:\Sirius\_T3\Mehtap\20180228\_exp28\_logP\_T3-2\18C-01005\_M15\_octanol\_pH-metric high logP.t3r**

Experiment start time: **3/1/2018 6:16:08 AM**  
 Analyst: **Pion**  
 Instrument ID: **T312060**

## Assay Settings (continued)

| Setting                             | Value          | Original Value | Date/Time changed | Imported from |
|-------------------------------------|----------------|----------------|-------------------|---------------|
| <b>Titration 3</b>                  |                |                |                   |               |
| Titrate from                        | Low to high pH |                |                   |               |
| Add additional water                | 0.00 mL        |                |                   |               |
| Additional partition solvent volume | 0.300 mL       |                |                   |               |
| Additional partition solvent added  | Automatic      |                |                   |               |
| After pH adjust stir for            | 30 seconds     |                |                   |               |
| Stir to allow partitioning for      | 15 seconds     |                |                   |               |
| Stirrer speed for partitioning      | 60%            |                |                   |               |
| <b>Data Point Stability</b>         |                |                |                   |               |
| Stir during data point collection   | No             |                |                   |               |
| Delay before data point collection  | 0 seconds      |                |                   |               |
| Number of points to average         | 20 points      |                |                   |               |
| Time interval between points        | 0.50 seconds   |                |                   |               |
| Required maximum standard deviation | 0.00100 dpH/dt |                |                   |               |
| Stability timeout after             | 60 seconds     |                |                   |               |

## Calibration Settings

| Setting                   | Value  | Date/Time changed   | Imported from             |
|---------------------------|--------|---------------------|---------------------------|
| Four-Plus alpha           | 0.130  | 3/1/2018 6:16:08 AM | C:\Sirius_T3\HCl18B27.t3r |
| Four-Plus S               | 0.9970 | 3/1/2018 6:16:08 AM | C:\Sirius_T3\HCl18B27.t3r |
| Four-Plus jH              | 0.8    | 3/1/2018 6:16:08 AM | C:\Sirius_T3\HCl18B27.t3r |
| Four-Plus jOH             | -0.4   | 3/1/2018 6:16:08 AM | C:\Sirius_T3\HCl18B27.t3r |
| Base concentration factor | 1.000  | 3/1/2018 6:16:08 AM | C:\Sirius_T3\KOH18B27.t3r |
| Acid concentration factor | 0.994  | 3/1/2018 6:16:08 AM | C:\Sirius_T3\HCl18B27.t3r |

## Instrument Settings

| Setting              | Value                      | Batch Id    | Install date           |
|----------------------|----------------------------|-------------|------------------------|
| Instrument owner     | Merck                      |             |                        |
| Instrument ID        | T312060                    |             |                        |
| Instrument type      | T3 Simulator               |             |                        |
| Software version     | 1.1.3.0                    |             |                        |
| Dispenser module     |                            | T3DM1200361 | 3/31/2009 5:24:52 AM   |
| Dispenser 0          | Water                      |             | 3/31/2009 5:25:05 AM   |
| Syringe volume       | 2.5 mL                     |             |                        |
| Firmware version     | 1.2.1(r2)                  |             |                        |
| Titrant              | Water (0.15 M KCl)         | 02-06-2018  | 2/27/2018 10:05:59 AM  |
| Dispenser 2          | Acid                       |             | 3/31/2009 5:25:11 AM   |
| Syringe volume       | 0.5 mL                     |             |                        |
| Firmware version     | 1.2.1(r2)                  |             |                        |
| Titrant              | Acid (0.5 M HCl)           | 02-27-2018  | 2/27/2018 10:27:22 AM  |
| Dispenser 1          | Base                       |             | 3/31/2009 5:25:21 AM   |
| Syringe volume       | 0.5 mL                     |             |                        |
| Firmware version     | 1.2.1(r2)                  |             |                        |
| Titrant              | Base (0.5 M KOH)           | 9/22/2017   | 2/27/2018 10:21:22 AM  |
| Dispenser 5          | Cosolvent                  |             | 3/31/2009 5:26:24 AM   |
| Syringe volume       | 2.5 mL                     |             |                        |
| Firmware version     | 1.2.1(r2)                  |             |                        |
| Distribution valve 5 | Distribution Valve         |             | 3/31/2009 5:28:19 AM   |
| Firmware version     | 1.1.3                      |             |                        |
| Port A               | Methanol (80%, 0.15 M KCl) | 09-26-17    | 2/7/2018 9:42:01 AM    |
| Port B               | Cyclohexane                | 11-01-17    | 2/27/2018 10:37:57 AM  |
| Dispenser 3          | Buffer                     |             | 8/3/2010 5:05:16 AM    |
| Syringe volume       | 0.5 mL                     |             |                        |
| Firmware version     | 1.2.1(r2)                  |             |                        |
| Titrant              | Dodecane                   | 2018/01/31  | 2/28/2018 10:18:04 AM  |
| Dispenser 6          | Octanol                    |             | 10/22/2010 10:52:43 AM |

Sample name: **M15\_octanol** Experiment start time: **3/1/2018 6:16:08 AM**  
 Assay name: **pH-metric high logP** Analyst: **Pion**  
 Assay ID: **18C-01005** Instrument ID: **T312060**  
 Filename: **C:\Sirius\_T3\Mehtap\20180228\_exp28\_logP\_T3-2\18C-01005\_M15\_octanol\_pH-metric high logP.t3r**

## Instrument Settings (continued)

| Setting                                   | Value                      | Batch Id    | Install date           |
|-------------------------------------------|----------------------------|-------------|------------------------|
| Syringe volume                            | 0.5 mL                     |             |                        |
| Firmware version                          | 1.2.1(r2)                  |             |                        |
| Titrant                                   | Octanol                    | 01-31-2018  | 2/27/2018 9:59:35 AM   |
| Titration                                 |                            | T3TM1200161 | 3/31/2009 5:24:17 AM   |
| Horizontal axis firmware version          | 1.17 AI1DI2DO2 Stepper 2   |             |                        |
| Vertical axis firmware version            | 1.17 AI1DI2DO2 Stepper 2   |             |                        |
| Chassis I/O firmware version              | 1.11 AI1DI0DO4 Norgren I/O |             |                        |
| Probe I/O firmware version                | 1.1.1                      |             |                        |
| Electrode                                 | T3 Electrode               | T3E0923     | 1/23/2018 2:01:00 PM   |
| E0 calibration                            | +3.93 mV                   |             | 3/1/2018 6:16:36 AM    |
| Filling solution                          | 3M KCl                     | KCL097      | 2/27/2018 9:49:43 AM   |
| Liquids                                   |                            |             |                        |
| Wash 1                                    | 50% IPA:50% Water          |             | 2/28/2018 10:23:32 AM  |
| Wash 2                                    | 0.5% Triton X-100 in H2O   |             | 2/28/2018 10:23:34 AM  |
| Buffer position 1                         | pH7 Wash                   |             | 2/28/2018 10:24:06 AM  |
| Buffer position 2                         | pH 7                       |             | 2/28/2018 10:24:08 AM  |
| Storage position                          |                            |             | 2/28/2018 10:21:14 AM  |
| Wash water                                | 8.4e+003 mL                | 02-27-2018  | 2/27/2018 9:54:39 AM   |
| Waste                                     | 7.1e+003 mL                |             | 11/28/2017 10:36:29 AM |
| Temperature controller                    |                            |             | 8/5/2010 6:35:13 AM    |
| Turbidity detector                        |                            |             | 3/31/2009 5:24:45 AM   |
| Spectrometer                              |                            | 074811      | 11/23/2010 11:22:28 AM |
| Dip probe                                 |                            | 10196       |                        |
| Wavelength coefficient A0                 | 183.333                    |             |                        |
| Wavelength coefficient A1                 | 2.21568                    |             |                        |
| Wavelength coefficient A2                 | -0.000289308               |             |                        |
| Total lamp lit time                       | 112:08:55                  |             | 11/23/2010 11:22:28 AM |
| Calibrated on                             | 2/27/2018 10:40:38 AM      |             |                        |
| Integration time                          | 40                         |             |                        |
| Scans averaged                            | 10                         |             |                        |
| Autoloader                                |                            | T3AL1200345 | 11/10/2015 9:34:13 AM  |
| Left-right axis firmware version          | 1.17 AI1DI2DO2 Stepper 2   |             |                        |
| Front-back axis firmware version          | 1.17 AI1DI2DO2 Stepper 2   |             |                        |
| Vertical axis firmware version            | 1.17 AI1DI2DO2 Stepper 2   |             |                        |
| Chassis I/O firmware version              | 1.11 AI1DI0DO4 Norgren I/O |             |                        |
| Configuration                             |                            |             |                        |
| Alternate titration position              | Titration position         |             |                        |
| Alternate reference position              | Reference position         |             |                        |
| Maximum standard vial volume              | 3.50 mL                    |             |                        |
| Maximum alternate vial volume             | 25.00 mL                   |             |                        |
| Automatic action idle period              | 5 minute(s)                |             |                        |
| Titration tube volume                     | 1.3 mL                     |             |                        |
| Syringe flush count                       | 3.50                       |             |                        |
| Flowing wash pump volume                  | 20.0 mL                    |             |                        |
| Flowing wash stir duration                | 5 s                        |             |                        |
| Flowing wash stir speed                   | 30%                        |             |                        |
| Solvent wash stir duration                | 5 s                        |             |                        |
| Solvent wash stir speed                   | 30%                        |             |                        |
| Surfactant wash stir duration             | 5 s                        |             |                        |
| Surfactant wash stir speed                | 30%                        |             |                        |
| E0 calibration minimum number of points   | 10                         |             |                        |
| E0 calibration maximum standard deviation | 0.01500                    |             |                        |
| E0 calibration timeout period             | 60 s                       |             |                        |
| E0 calibration stir duration              | 5 s                        |             |                        |
| E0 calibration preparation stir speed     | 30%                        |             |                        |
| E0 calibration buffer wash stir duration  | 5 s                        |             |                        |
| E0 calibration buffer wash stir speed     | 30%                        |             |                        |
| E0 calibration reading stir speed         | 0%                         |             |                        |

Sample name: **M15\_octanol** Experiment start time: **3/1/2018 6:16:08 AM**  
 Assay name: **pH-metric high logP** Analyst: **Pion**  
 Assay ID: **18C-01005** Instrument ID: **T312060**  
 Filename: **C:\Sirius\_T3\Mehtap\20180228\_exp28\_logP\_T3-2\18C-01005\_M15\_octanol\_pH-metric high logP.t3r**

## Instrument Settings (continued)

| Setting                                     | Value   | Batch Id | Install date |
|---------------------------------------------|---------|----------|--------------|
| Spectrometer calibration stir duration      | 5 s     |          |              |
| Spectrometer calibration stir speed         | 30%     |          |              |
| Spectrometer calibration wash pump volume   | 20.0 mL |          |              |
| Spectrometer calibration wash stir duration | 5 s     |          |              |
| Spectrometer calibration wash stir speed    | 30%     |          |              |
| Overhead dispense height                    | 10000   |          |              |

## Refinement Settings

| Setting                        | Value    | Default value |
|--------------------------------|----------|---------------|
| Turbidity detection method     | None     | None          |
| Turbidity wavelength to assess | 500.0 nm | 500.0 nm      |
| Turbidity maximum absorbance   | 0.100    | 0.100         |
| Turbidity probe threshold      | 50.00    | 50.00         |

## Experiment Log

[2:49] Air gap created for Water (0.15 M KCl)  
 [2:49] Air gap created for Acid (0.5 M HCl)  
 [2:50] Air gap created for Base (0.5 M KOH)  
 [2:50] Air gap released for Water (0.15 M KCl)  
 [2:54] Titrator arm moved over Titration position  
 [2:54] Titration 1 of 3  
 [2:54] Adding initial titrants  
 [2:54] Automatically add 2.20000 mL of water  
 [3:31] Dispensed 2.200024 mL of Water (0.15 M KCl)  
 [3:35] Titrator arm moved over Drain  
 [9:16] Titrator arm moved to Titration position  
 [9:16] Argon flow rate set to 100  
 [9:16] Stirrer speed set to 10  
 [9:21] Automatically add 0.05000 mL of Octanol  
 [9:23] Dispensed 0.050000 mL of Octanol  
 [9:24] Initial pH = 7.47  
 [9:24] Iterative adjust 7.47 -> 2.00  
 [9:24] pH 7.47 -> 2.00  
 [9:27] Air gap released for Acid (0.5 M HCl)  
 [9:27] Dispensed 0.095626 mL of Acid (0.5 M HCl)  
 [9:32] Holding pH 2.00  
 [11:33] Stirrer speed set to 0  
 [11:33] Stirrer speed set to 50  
 [11:33] Iterative adjust 1.95 -> 2.00  
 [11:33] pH 1.95 -> 2.00  
 [11:33] Air gap released for Base (0.5 M KOH)  
 [11:34] Dispensed 0.007785 mL of Base (0.5 M KOH)  
 [12:25] Stirrer speed set to 0  
 [12:35] Datapoint id 1 collected  
 [12:35] Stirrer speed set to 50  
 [12:40] pH 2.03 -> 2.23  
 [12:40] Using cautious pH adjust  
 [12:40] Dispensed 0.011783 mL of Base (0.5 M KOH)  
 [12:45] Stepping pH = 2.11  
 [12:46] Dispensed 0.009196 mL of Base (0.5 M KOH)  
 [12:51] Stepping pH = 2.21  
 [12:51] Dispensed 0.001740 mL of Base (0.5 M KOH)  
 [12:56] Stepping pH = 2.23  
 [13:11] Stirrer speed set to 0  
 [13:21] Datapoint id 2 collected  
 [13:21] Charge balance equation is out by 3.7%  
 [13:21] Stirrer speed set to 50

Sample name: **M15\_octanol**  
Assay name: **pH-metric high logP**  
Assay ID: **18C-01005**  
Filename: **C:\Sirius\_T3\Mehtap\20180228\_exp28\_logP\_T3-2\18C-01005\_M15\_octanol\_pH-metric high logP.t3r**

Experiment start time: **3/1/2018 6:16:08 AM**  
Analyst: **Pion**  
Instrument ID: **T312060**

## Experiment Log (continued)

[13:26] pH 2.24 -> 2.44  
[13:26] Using charge balance adjust  
[13:27] Dispensed 0.015193 mL of Base (0.5 M KOH)  
[13:47] Stirrer speed set to 0  
[13:57] Datapoint id 3 collected  
[13:57] Charge balance equation is out by 9.8%  
[13:57] Stirrer speed set to 50  
[14:02] pH 2.47 -> 2.67  
[14:02] Using charge balance adjust  
[14:02] Dispensed 0.010066 mL of Base (0.5 M KOH)  
[14:22] Stirrer speed set to 0  
[14:32] Datapoint id 4 collected  
[14:32] Charge balance equation is out by 0.9%  
[14:32] Stirrer speed set to 50  
[14:38] pH 2.68 -> 2.88  
[14:38] Using charge balance adjust  
[14:38] Dispensed 0.007103 mL of Base (0.5 M KOH)  
[14:58] Stirrer speed set to 0  
[15:09] Datapoint id 5 collected  
[15:09] Charge balance equation is out by 10.7%  
[15:09] Stirrer speed set to 50  
[15:14] pH 2.91 -> 3.11  
[15:14] Using charge balance adjust  
[15:14] Dispensed 0.004892 mL of Base (0.5 M KOH)  
[15:34] Stirrer speed set to 0  
[15:44] Datapoint id 6 collected  
[15:44] Charge balance equation is out by -6.0%  
[15:44] Stirrer speed set to 50  
[15:49] pH 3.11 -> 3.31  
[15:49] Using charge balance adjust  
[15:49] Dispensed 0.003551 mL of Base (0.5 M KOH)  
[16:10] Stirrer speed set to 0  
[16:20] Datapoint id 7 collected  
[16:20] Charge balance equation is out by 0.0%  
[16:20] Stirrer speed set to 50  
[16:25] pH 3.31 -> 3.51  
[16:25] Using charge balance adjust  
[16:25] Dispensed 0.002540 mL of Base (0.5 M KOH)  
[16:45] Stirrer speed set to 0  
[16:56] Datapoint id 8 collected  
[16:56] Charge balance equation is out by 4.9%  
[16:56] Stirrer speed set to 50  
[17:01] pH 3.53 -> 3.73  
[17:01] Using charge balance adjust  
[17:01] Dispensed 0.001858 mL of Base (0.5 M KOH)  
[17:21] Stirrer speed set to 0  
[17:31] Datapoint id 9 collected  
[17:31] Charge balance equation is out by -2.1%  
[17:31] Stirrer speed set to 50  
[17:36] pH 3.74 -> 3.94  
[17:36] Using charge balance adjust  
[17:36] Dispensed 0.001529 mL of Base (0.5 M KOH)  
[17:57] Stirrer speed set to 0  
[18:07] Datapoint id 10 collected  
[18:07] Charge balance equation is out by -17.7%  
[18:07] Stirrer speed set to 50  
[18:12] pH 3.91 -> 4.11  
[18:12] Using cautious pH adjust  
[18:12] Dispensed 0.000729 mL of Base (0.5 M KOH)

Sample name: **M15\_octanol**  
Assay name: **pH-metric high logP**  
Assay ID: **18C-01005**  
Filename: **C:\Sirius\_T3\Mehtap\20180228\_exp28\_logP\_T3-2\18C-01005\_M15\_octanol\_pH-metric high logP.t3r**

Experiment start time: **3/1/2018 6:16:08 AM**  
Analyst: **Pion**  
Instrument ID: **T312060**

## Experiment Log (continued)

[18:17] Stepping pH = 3.99  
[18:17] Dispensed 0.000635 mL of Base (0.5 M KOH)  
[18:22] Stepping pH = 4.09  
[18:22] Dispensed 0.000094 mL of Base (0.5 M KOH)  
[18:27] Stepping pH = 4.11  
[18:43] Stirrer speed set to 0  
[18:53] Datapoint id 11 collected  
[18:53] Charge balance equation is out by -0.4%  
[18:53] Stirrer speed set to 50  
[18:58] pH 4.11 -> 4.31  
[18:58] Using charge balance adjust  
[18:58] Dispensed 0.001529 mL of Base (0.5 M KOH)  
[19:18] Stirrer speed set to 0  
[19:28] Datapoint id 12 collected  
[19:28] Charge balance equation is out by 33.2%  
[19:28] Stirrer speed set to 50  
[19:33] pH 4.38 -> 4.58  
[19:33] Using cautious pH adjust  
[19:33] Dispensed 0.000917 mL of Base (0.5 M KOH)  
[19:38] Stepping pH = 4.51  
[19:38] Dispensed 0.000400 mL of Base (0.5 M KOH)  
[19:44] Stepping pH = 4.57  
[19:59] Stirrer speed set to 0  
[20:09] Datapoint id 13 collected  
[20:09] Charge balance equation is out by 28.2%  
[20:09] Stirrer speed set to 50  
[20:14] pH 4.57 -> 4.77  
[20:14] Using cautious pH adjust  
[20:14] Dispensed 0.001035 mL of Base (0.5 M KOH)  
[20:19] Stepping pH = 4.70  
[20:19] Dispensed 0.000494 mL of Base (0.5 M KOH)  
[20:24] Stepping pH = 4.76  
[20:24] Dispensed 0.000094 mL of Base (0.5 M KOH)  
[20:29] Stepping pH = 4.77  
[20:44] Stirrer speed set to 0  
[20:54] Datapoint id 14 collected  
[20:54] Charge balance equation is out by 22.3%  
[20:54] Stirrer speed set to 50  
[21:00] pH 4.77 -> 4.97  
[21:00] Using cautious pH adjust  
[21:00] Dispensed 0.001129 mL of Base (0.5 M KOH)  
[21:05] Stepping pH = 4.88  
[21:05] Dispensed 0.000635 mL of Base (0.5 M KOH)  
[21:10] Stepping pH = 4.95  
[21:10] Dispensed 0.000188 mL of Base (0.5 M KOH)  
[21:15] Stepping pH = 4.96  
[21:30] Stirrer speed set to 0  
[21:41] Datapoint id 15 collected  
[21:41] Charge balance equation is out by 12.8%  
[21:41] Stirrer speed set to 50  
[21:46] pH 4.96 -> 5.16  
[21:46] Using charge balance adjust  
[21:46] Dispensed 0.002211 mL of Base (0.5 M KOH)  
[22:06] Stirrer speed set to 0  
[22:16] Datapoint id 16 collected  
[22:16] Charge balance equation is out by -2.8%  
[22:16] Stirrer speed set to 50  
[22:21] pH 5.16 -> 5.36  
[22:21] Using charge balance adjust

Sample name: **M15\_octanol**  
Assay name: **pH-metric high logP**  
Assay ID: **18C-01005**  
Filename: **C:\Sirius\_T3\Mehtap\20180228\_exp28\_logP\_T3-2\18C-01005\_M15\_octanol\_pH-metric high logP.t3r**

Experiment start time: **3/1/2018 6:16:08 AM**  
Analyst: **Pion**  
Instrument ID: **T312060**

## Experiment Log (continued)

[22:22] Dispensed 0.002023 mL of Base (0.5 M KOH)  
[22:42] Stirrer speed set to 0  
[22:52] Datapoint id 17 collected  
[22:52] Charge balance equation is out by -0.1%  
[22:52] Stirrer speed set to 50  
[22:57] pH 5.37 -> 5.57  
[22:57] Using charge balance adjust  
[22:57] Dispensed 0.001646 mL of Base (0.5 M KOH)  
[23:18] Stirrer speed set to 0  
[23:28] Datapoint id 18 collected  
[23:28] Charge balance equation is out by 12.1%  
[23:28] Stirrer speed set to 50  
[23:33] pH 5.60 -> 5.80  
[23:33] Using charge balance adjust  
[23:33] Dispensed 0.001223 mL of Base (0.5 M KOH)  
[23:53] Stirrer speed set to 0  
[24:03] Datapoint id 19 collected  
[24:03] Charge balance equation is out by 16.5%  
[24:03] Stirrer speed set to 50  
[24:08] pH 5.84 -> 6.04  
[24:08] Using cautious pH adjust  
[24:08] Dispensed 0.000423 mL of Base (0.5 M KOH)  
[24:13] Stepping pH = 5.92  
[24:14] Dispensed 0.000376 mL of Base (0.5 M KOH)  
[24:19] Stepping pH = 6.03  
[24:34] Stirrer speed set to 0  
[24:44] Datapoint id 20 collected  
[24:44] Charge balance equation is out by 3.8%  
[24:44] Stirrer speed set to 50  
[24:49] pH 6.05 -> 6.25  
[24:49] Using charge balance adjust  
[24:49] Dispensed 0.000564 mL of Base (0.5 M KOH)  
[25:10] Stirrer speed set to 0  
[25:22] Datapoint id 21 collected  
[25:22] Charge balance equation is out by 16.9%  
[25:22] Stirrer speed set to 50  
[25:27] pH 6.29 -> 6.49  
[25:27] Using cautious pH adjust  
[25:27] Dispensed 0.000188 mL of Base (0.5 M KOH)  
[25:32] Stepping pH = 6.33  
[25:33] Dispensed 0.000353 mL of Base (0.5 M KOH)  
[25:38] Stepping pH = 6.52  
[25:53] Stirrer speed set to 0  
[26:07] Datapoint id 22 collected  
[26:07] Charge balance equation is out by -49.2%  
[26:07] Stirrer speed set to 50  
[26:12] pH 6.58 -> 6.78  
[26:12] Using cautious pH adjust  
[26:12] Dispensed 0.000094 mL of Base (0.5 M KOH)  
[26:17] Stepping pH = 6.60  
[26:18] Dispensed 0.000282 mL of Base (0.5 M KOH)  
[26:23] Stepping pH = 6.84  
[26:38] Stirrer speed set to 0  
[27:26] Datapoint id 23 collected  
[27:26] Charge balance equation is out by -83.4%  
[27:26] Stirrer speed set to 50  
[27:31] pH 6.94 -> 7.14  
[27:31] Using cautious pH adjust  
[27:32] Dispensed 0.000047 mL of Base (0.5 M KOH)



Sample name: **M15\_octanol**  
Assay name: **pH-metric high logP**  
Assay ID: **18C-01005**  
Filename: **C:\Sirius\_T3\Mehtap\20180228\_exp28\_logP\_T3-2\18C-01005\_M15\_octanol\_pH-metric high logP.t3r**

Experiment start time: **3/1/2018 6:16:08 AM**  
Analyst: **Pion**  
Instrument ID: **T312060**

## Experiment Log (continued)

[27:37] Stepping pH = 6.96  
[27:37] Dispensed 0.000118 mL of Base (0.5 M KOH)  
[27:42] Stepping pH = 7.04  
[27:42] Dispensed 0.000094 mL of Base (0.5 M KOH)  
[27:47] Stepping pH = 7.24  
[28:02] Stirrer speed set to 0  
[29:02] Datapoint id 24 collected  
[29:02] Charge balance equation is out by -171.1%  
[29:02] Stirrer speed set to 50  
[29:07] pH 7.30 -> 7.50  
[29:07] Using cautious pH adjust  
[29:07] Dispensed 0.000024 mL of Base (0.5 M KOH)  
[29:12] Stepping pH = 7.32  
[29:12] Dispensed 0.000047 mL of Base (0.5 M KOH)  
[29:17] Stepping pH = 7.36  
[29:17] Dispensed 0.000094 mL of Base (0.5 M KOH)  
[29:23] Stepping pH = 7.64  
[29:38] Stirrer speed set to 0  
[30:38] Datapoint id 25 collected  
[30:38] Charge balance equation is out by -247.2%  
[30:38] Stirrer speed set to 50  
[30:43] pH 7.80 -> 8.00  
[30:43] Using cautious pH adjust  
[30:43] Dispensed 0.000024 mL of Base (0.5 M KOH)  
[30:48] Stepping pH = 7.88  
[30:48] Dispensed 0.000024 mL of Base (0.5 M KOH)  
[30:53] Stepping pH = 7.97  
[30:53] Dispensed 0.000024 mL of Base (0.5 M KOH)  
[30:58] Stepping pH = 8.09  
[31:13] Stirrer speed set to 0  
[32:13] Datapoint id 26 collected  
[32:13] Charge balance equation is out by -210.8%  
[32:13] Stirrer speed set to 50  
[32:18] pH 8.06 -> 8.26  
[32:18] Using cautious pH adjust  
[32:19] Dispensed 0.000024 mL of Base (0.5 M KOH)  
[32:24] Stepping pH = 8.11  
[32:24] Dispensed 0.000024 mL of Base (0.5 M KOH)  
[32:29] Stepping pH = 8.16  
[32:29] Dispensed 0.000024 mL of Base (0.5 M KOH)  
[32:34] Stepping pH = 8.26  
[32:49] Stirrer speed set to 0  
[33:35] Datapoint id 27 collected  
[33:35] Charge balance equation is out by -276.2%  
[33:35] Stirrer speed set to 50  
[33:40] pH 8.28 -> 8.48  
[33:40] Using cautious pH adjust  
[33:40] Dispensed 0.000024 mL of Base (0.5 M KOH)  
[33:45] Stepping pH = 8.29  
[33:45] Dispensed 0.000024 mL of Base (0.5 M KOH)  
[33:50] Stepping pH = 8.33  
[33:50] Dispensed 0.000047 mL of Base (0.5 M KOH)  
[33:55] Stepping pH = 8.43  
[33:55] Dispensed 0.000024 mL of Base (0.5 M KOH)  
[34:00] Stepping pH = 8.55  
[34:15] Stirrer speed set to 0  
[34:40] Datapoint id 28 collected  
[34:40] Charge balance equation is out by -522.0%  
[34:40] Stirrer speed set to 50

Sample name: **M15\_octanol**  
Assay name: **pH-metric high logP**  
Assay ID: **18C-01005**  
Filename: **C:\Sirius\_T3\Mehtap\20180228\_exp28\_logP\_T3-2\18C-01005\_M15\_octanol\_pH-metric high logP.t3r**

Experiment start time: **3/1/2018 6:16:08 AM**  
Analyst: **Pion**  
Instrument ID: **T312060**

## Experiment Log (continued)

[34:45] pH 8.59 -> 8.79  
[34:45] Using cautious pH adjust  
[34:45] Dispensed 0.000024 mL of Base (0.5 M KOH)  
[34:50] Stepping pH = 8.63  
[34:50] Dispensed 0.000024 mL of Base (0.5 M KOH)  
[34:55] Stepping pH = 8.69  
[34:55] Dispensed 0.000024 mL of Base (0.5 M KOH)  
[35:00] Stepping pH = 8.75  
[35:00] Dispensed 0.000024 mL of Base (0.5 M KOH)  
[35:05] Stepping pH = 8.81  
[35:21] Stirrer speed set to 0  
[35:40] Datapoint id 29 collected  
[35:40] Charge balance equation is out by -241.0%  
[35:40] Stirrer speed set to 50  
[35:45] pH 8.84 -> 9.04  
[35:45] Using cautious pH adjust  
[35:45] Dispensed 0.000024 mL of Base (0.5 M KOH)  
[35:50] Stepping pH = 8.86  
[35:50] Dispensed 0.000071 mL of Base (0.5 M KOH)  
[35:55] Stepping pH = 8.93  
[35:56] Dispensed 0.000047 mL of Base (0.5 M KOH)  
[36:01] Stepping pH = 9.03  
[36:16] Stirrer speed set to 0  
[36:44] Datapoint id 30 collected  
[36:44] Charge balance equation is out by -213.1%  
[36:44] Stirrer speed set to 50  
[36:49] pH 9.07 -> 9.27  
[36:49] Using cautious pH adjust  
[36:49] Dispensed 0.000047 mL of Base (0.5 M KOH)  
[36:54] Stepping pH = 9.11  
[36:54] Dispensed 0.000071 mL of Base (0.5 M KOH)  
[36:59] Stepping pH = 9.21  
[36:59] Dispensed 0.000024 mL of Base (0.5 M KOH)  
[37:04] Stepping pH = 9.27  
[37:19] Stirrer speed set to 0  
[37:34] Datapoint id 31 collected  
[37:34] Charge balance equation is out by -90.2%  
[37:34] Stirrer speed set to 50  
[37:39] pH 9.28 -> 9.48  
[37:39] Using cautious pH adjust  
[37:39] Dispensed 0.000047 mL of Base (0.5 M KOH)  
[37:44] Stepping pH = 9.31  
[37:44] Dispensed 0.000141 mL of Base (0.5 M KOH)  
[37:49] Stepping pH = 9.46  
[37:49] Dispensed 0.000024 mL of Base (0.5 M KOH)  
[37:55] Stepping pH = 9.51  
[38:10] Stirrer speed set to 0  
[38:24] Datapoint id 32 collected  
[38:24] Charge balance equation is out by -88.1%  
[38:24] Stirrer speed set to 50  
[38:29] pH 9.52 -> 9.72  
[38:29] Using cautious pH adjust  
[38:29] Dispensed 0.000094 mL of Base (0.5 M KOH)  
[38:34] Stepping pH = 9.57  
[38:34] Dispensed 0.000141 mL of Base (0.5 M KOH)  
[38:39] Stepping pH = 9.70  
[38:39] Dispensed 0.000024 mL of Base (0.5 M KOH)  
[38:44] Stepping pH = 9.73  
[38:59] Stirrer speed set to 0



Sample name: **M15\_octanol**  
Assay name: **pH-metric high logP**  
Assay ID: **18C-01005**  
Filename: **C:\Sirius\_T3\Mehtap\20180228\_exp28\_logP\_T3-2\18C-01005\_M15\_octanol\_pH-metric high logP.t3r**

Experiment start time: **3/1/2018 6:16:08 AM**  
Analyst: **Pion**  
Instrument ID: **T312060**

## Experiment Log (continued)

[39:12] Datapoint id 33 collected  
[39:12] Charge balance equation is out by -50.1%  
[39:12] Stirrer speed set to 50  
[39:17] pH 9.74 -> 9.94  
[39:17] Using cautious pH adjust  
[39:17] Dispensed 0.000141 mL of Base (0.5 M KOH)  
[39:22] Stepping pH = 9.82  
[39:22] Dispensed 0.000141 mL of Base (0.5 M KOH)  
[39:27] Stepping pH = 9.91  
[39:27] Dispensed 0.000047 mL of Base (0.5 M KOH)  
[39:32] Stepping pH = 9.94  
[39:48] Stirrer speed set to 0  
[39:58] Datapoint id 34 collected  
[39:58] Charge balance equation is out by -18.1%  
[39:58] Stirrer speed set to 50  
[40:03] pH 9.95 -> 10.05  
[40:03] Using cautious pH adjust  
[40:03] Dispensed 0.000094 mL of Base (0.5 M KOH)  
[40:08] Stepping pH = 9.98  
[40:08] Dispensed 0.000118 mL of Base (0.5 M KOH)  
[40:13] Stepping pH = 10.04  
[40:28] Stirrer speed set to 0  
[40:38] Datapoint id 35 collected  
[40:38] Charge balance equation is out by -23.6%  
[40:38] Titration 2 of 3  
[40:38] Adding initial titrants  
[40:38] Automatically add 0.10000 mL of Octanol  
[40:41] Dispensed 0.100000 mL of Octanol  
[40:41] Stirrer speed set to 10  
[40:42] Stirrer speed set to 55  
[40:42] Iterative adjust 10.05 -> 2.00  
[40:42] pH 10.05 -> 2.00  
[40:44] Dispensed 0.100000 mL of Acid (0.5 M HCl)  
[40:49] pH 2.03 -> 2.00  
[40:49] Dispensed 0.005268 mL of Acid (0.5 M HCl)  
[41:40] Stirrer speed set to 0  
[41:50] Datapoint id 36 collected  
[41:50] Stirrer speed set to 55  
[41:55] pH 1.96 -> 2.16  
[41:55] Using cautious pH adjust  
[41:55] Dispensed 0.014722 mL of Base (0.5 M KOH)  
[42:00] Stepping pH = 2.05  
[42:01] Dispensed 0.011054 mL of Base (0.5 M KOH)  
[42:06] Stepping pH = 2.14  
[42:06] Dispensed 0.001999 mL of Base (0.5 M KOH)  
[42:11] Stepping pH = 2.17  
[42:26] Stirrer speed set to 0  
[42:36] Datapoint id 37 collected  
[42:36] Charge balance equation is out by 5.8%  
[42:36] Stirrer speed set to 55  
[42:41] pH 2.17 -> 2.37  
[42:41] Using charge balance adjust  
[42:42] Dispensed 0.018791 mL of Base (0.5 M KOH)  
[43:02] Stirrer speed set to 0  
[43:12] Datapoint id 38 collected  
[43:12] Charge balance equation is out by 6.9%  
[43:12] Stirrer speed set to 55  
[43:17] pH 2.39 -> 2.59  
[43:17] Using charge balance adjust

Sample name: **M15\_octanol**  
Assay name: **pH-metric high logP**  
Assay ID: **18C-01005**  
Filename: **C:\Sirius\_T3\Mehtap\20180228\_exp28\_logP\_T3-2\18C-01005\_M15\_octanol\_pH-metric high logP.t3r**

Experiment start time: **3/1/2018 6:16:08 AM**  
Analyst: **Pion**  
Instrument ID: **T312060**

## Experiment Log (continued)

[43:18] Dispensed 0.012371 mL of Base (0.5 M KOH)  
[43:38] Stirrer speed set to 0  
[43:48] Datapoint id 39 collected  
[43:48] Charge balance equation is out by 4.3%  
[43:48] Stirrer speed set to 55  
[43:53] pH 2.61 -> 2.81  
[43:53] Using charge balance adjust  
[43:53] Dispensed 0.008514 mL of Base (0.5 M KOH)  
[44:13] Stirrer speed set to 0  
[44:23] Datapoint id 40 collected  
[44:23] Charge balance equation is out by 6.2%  
[44:23] Stirrer speed set to 55  
[44:29] pH 2.83 -> 3.03  
[44:29] Using charge balance adjust  
[44:29] Dispensed 0.005974 mL of Base (0.5 M KOH)  
[44:49] Stirrer speed set to 0  
[44:59] Datapoint id 41 collected  
[44:59] Charge balance equation is out by 9.4%  
[44:59] Stirrer speed set to 55  
[45:04] pH 3.05 -> 3.25  
[45:04] Using charge balance adjust  
[45:04] Dispensed 0.004210 mL of Base (0.5 M KOH)  
[45:25] Stirrer speed set to 0  
[45:35] Datapoint id 42 collected  
[45:35] Charge balance equation is out by -1.8%  
[45:35] Stirrer speed set to 55  
[45:40] pH 3.25 -> 3.45  
[45:40] Using charge balance adjust  
[45:40] Dispensed 0.003151 mL of Base (0.5 M KOH)  
[46:00] Stirrer speed set to 0  
[46:10] Datapoint id 43 collected  
[46:10] Charge balance equation is out by 8.8%  
[46:10] Stirrer speed set to 55  
[46:15] pH 3.47 -> 3.67  
[46:15] Using charge balance adjust  
[46:15] Dispensed 0.002399 mL of Base (0.5 M KOH)  
[46:36] Stirrer speed set to 0  
[46:46] Datapoint id 44 collected  
[46:46] Charge balance equation is out by -5.2%  
[46:46] Stirrer speed set to 55  
[46:51] pH 3.67 -> 3.87  
[46:51] Using charge balance adjust  
[46:51] Dispensed 0.002070 mL of Base (0.5 M KOH)  
[47:11] Stirrer speed set to 0  
[47:22] Datapoint id 45 collected  
[47:22] Charge balance equation is out by -7.7%  
[47:22] Stirrer speed set to 55  
[47:27] pH 3.86 -> 4.06  
[47:27] Using charge balance adjust  
[47:27] Dispensed 0.001999 mL of Base (0.5 M KOH)  
[47:47] Stirrer speed set to 0  
[47:57] Datapoint id 46 collected  
[47:57] Charge balance equation is out by 5.7%  
[47:57] Stirrer speed set to 55  
[48:02] pH 4.07 -> 4.27  
[48:02] Using charge balance adjust  
[48:02] Dispensed 0.002117 mL of Base (0.5 M KOH)  
[48:22] Stirrer speed set to 0  
[48:32] Datapoint id 47 collected

Sample name: **M15\_octanol**  
Assay name: **pH-metric high logP**  
Assay ID: **18C-01005**  
Filename: **C:\Sirius\_T3\Mehtap\20180228\_exp28\_logP\_T3-2\18C-01005\_M15\_octanol\_pH-metric high logP.t3r**

Experiment start time: **3/1/2018 6:16:08 AM**  
Analyst: **Pion**  
Instrument ID: **T312060**

## Experiment Log (continued)

[48:32] Charge balance equation is out by 24.4%  
[48:32] Stirrer speed set to 55  
[48:38] pH 4.31 -> 4.51  
[48:38] Using cautious pH adjust  
[48:38] Dispensed 0.001152 mL of Base (0.5 M KOH)  
[48:43] Stepping pH = 4.41  
[48:43] Dispensed 0.000870 mL of Base (0.5 M KOH)  
[48:48] Stepping pH = 4.50  
[48:48] Dispensed 0.000165 mL of Base (0.5 M KOH)  
[48:53] Stepping pH = 4.51  
[49:08] Stirrer speed set to 0  
[49:18] Datapoint id 48 collected  
[49:18] Charge balance equation is out by 5.4%  
[49:18] Stirrer speed set to 55  
[49:23] pH 4.51 -> 4.71  
[49:23] Using charge balance adjust  
[49:24] Dispensed 0.002352 mL of Base (0.5 M KOH)  
[49:44] Stirrer speed set to 0  
[49:54] Datapoint id 49 collected  
[49:54] Charge balance equation is out by -0.6%  
[49:54] Stirrer speed set to 55  
[49:59] pH 4.71 -> 4.91  
[49:59] Using charge balance adjust  
[49:59] Dispensed 0.002211 mL of Base (0.5 M KOH)  
[50:19] Stirrer speed set to 0  
[50:29] Datapoint id 50 collected  
[50:29] Charge balance equation is out by 5.6%  
[50:29] Stirrer speed set to 55  
[50:34] pH 4.93 -> 5.13  
[50:34] Using charge balance adjust  
[50:35] Dispensed 0.001881 mL of Base (0.5 M KOH)  
[50:55] Stirrer speed set to 0  
[51:05] Datapoint id 51 collected  
[51:05] Charge balance equation is out by 13.1%  
[51:05] Stirrer speed set to 55  
[51:10] pH 5.16 -> 5.36  
[51:10] Using charge balance adjust  
[51:11] Dispensed 0.001435 mL of Base (0.5 M KOH)  
[51:31] Stirrer speed set to 0  
[51:41] Datapoint id 52 collected  
[51:41] Charge balance equation is out by 15.8%  
[51:41] Stirrer speed set to 55  
[51:46] pH 5.39 -> 5.59  
[51:46] Using cautious pH adjust  
[51:46] Dispensed 0.000517 mL of Base (0.5 M KOH)  
[51:52] Stepping pH = 5.45  
[51:52] Dispensed 0.000635 mL of Base (0.5 M KOH)  
[51:57] Stepping pH = 5.60  
[52:12] Stirrer speed set to 0  
[52:23] Datapoint id 53 collected  
[52:23] Charge balance equation is out by -12.6%  
[52:23] Stirrer speed set to 55  
[52:28] pH 5.65 -> 5.85  
[52:28] Using charge balance adjust  
[52:28] Dispensed 0.000659 mL of Base (0.5 M KOH)  
[52:48] Stirrer speed set to 0  
[53:00] Datapoint id 54 collected  
[53:00] Charge balance equation is out by 0.5%  
[53:00] Stirrer speed set to 55

Sample name: **M15\_octanol**  
Assay name: **pH-metric high logP**  
Assay ID: **18C-01005**  
Filename: **C:\Sirius\_T3\Mehtap\20180228\_exp28\_logP\_T3-2\18C-01005\_M15\_octanol\_pH-metric high logP.t3r**

Experiment start time: **3/1/2018 6:16:08 AM**  
Analyst: **Pion**  
Instrument ID: **T312060**

## Experiment Log (continued)

[53:05] pH 5.86 -> 6.06  
[53:05] Using charge balance adjust  
[53:06] Dispensed 0.000447 mL of Base (0.5 M KOH)  
[53:26] Stirrer speed set to 0  
[53:39] Datapoint id 55 collected  
[53:39] Charge balance equation is out by -8.3%  
[53:39] Stirrer speed set to 55  
[53:44] pH 6.05 -> 6.25  
[53:44] Using charge balance adjust  
[53:44] Dispensed 0.000329 mL of Base (0.5 M KOH)  
[54:04] Stirrer speed set to 0  
[54:18] Datapoint id 56 collected  
[54:18] Charge balance equation is out by -4.8%  
[54:18] Stirrer speed set to 55  
[54:23] pH 6.24 -> 6.44  
[54:23] Using charge balance adjust  
[54:23] Dispensed 0.000235 mL of Base (0.5 M KOH)  
[54:44] Stirrer speed set to 0  
[55:11] Datapoint id 57 collected  
[55:11] Charge balance equation is out by -4.5%  
[55:11] Stirrer speed set to 55  
[55:16] pH 6.43 -> 6.63  
[55:16] Using charge balance adjust  
[55:16] Dispensed 0.000165 mL of Base (0.5 M KOH)  
[55:37] Stirrer speed set to 0  
[56:04] Datapoint id 58 collected  
[56:04] Charge balance equation is out by -2.3%  
[56:04] Stirrer speed set to 55  
[56:09] pH 6.63 -> 6.83  
[56:09] Using charge balance adjust  
[56:09] Dispensed 0.000118 mL of Base (0.5 M KOH)  
[56:29] Stirrer speed set to 0  
[57:08] Datapoint id 59 collected  
[57:08] Charge balance equation is out by -7.5%  
[57:08] Stirrer speed set to 55  
[57:13] pH 6.81 -> 7.01  
[57:13] Using charge balance adjust  
[57:13] Dispensed 0.000094 mL of Base (0.5 M KOH)  
[57:33] Stirrer speed set to 0  
[58:22] Datapoint id 60 collected  
[58:22] Charge balance equation is out by -25.4%  
[58:22] Stirrer speed set to 55  
[58:28] pH 6.94 -> 7.14  
[58:28] Using cautious pH adjust  
[58:28] Dispensed 0.000024 mL of Base (0.5 M KOH)  
[58:33] Stepping pH = 6.96  
[58:33] Dispensed 0.000094 mL of Base (0.5 M KOH)  
[58:38] Stepping pH = 7.14  
[58:53] Stirrer speed set to 0  
[59:53] Datapoint id 61 collected  
[59:53] Charge balance equation is out by -82.5%  
[59:53] Stirrer speed set to 55  
[59:58] pH 7.28 -> 7.48  
[59:58] Using cautious pH adjust  
[59:58] Dispensed 0.000024 mL of Base (0.5 M KOH)  
[1:00:03] Stepping pH = 7.34  
[1:00:03] Dispensed 0.000024 mL of Base (0.5 M KOH)  
[1:00:08] Stepping pH = 7.41  
[1:00:09] Dispensed 0.000024 mL of Base (0.5 M KOH)

Sample name: **M15\_octanol**  
Assay name: **pH-metric high logP**  
Assay ID: **18C-01005**  
Filename: **C:\Sirius\_T3\Mehtap\20180228\_exp28\_logP\_T3-2\18C-01005\_M15\_octanol\_pH-metric high logP.t3r**

Experiment start time: **3/1/2018 6:16:08 AM**  
Analyst: **Pion**  
Instrument ID: **T312060**

## Experiment Log (continued)

[1:00:14] Stepping pH = 7.51  
[1:00:29] Stirrer speed set to 0  
[1:01:29] Datapoint id 62 collected  
[1:01:29] Charge balance equation is out by -78.6%  
[1:01:29] Stirrer speed set to 55  
[1:01:34] pH 7.53 -> 7.73  
[1:01:34] Using cautious pH adjust  
[1:01:34] Dispensed 0.000024 mL of Base (0.5 M KOH)  
[1:01:39] Stepping pH = 7.61  
[1:01:39] Dispensed 0.000024 mL of Base (0.5 M KOH)  
[1:01:44] Stepping pH = 7.72  
[1:01:59] Stirrer speed set to 0  
[1:02:59] Datapoint id 63 collected  
[1:02:59] Charge balance equation is out by -84.1%  
[1:02:59] Stirrer speed set to 55  
[1:03:04] pH 7.73 -> 7.93  
[1:03:04] Using cautious pH adjust  
[1:03:04] Dispensed 0.000024 mL of Base (0.5 M KOH)  
[1:03:09] Stepping pH = 7.79  
[1:03:10] Dispensed 0.000024 mL of Base (0.5 M KOH)  
[1:03:15] Stepping pH = 7.89  
[1:03:15] Dispensed 0.000024 mL of Base (0.5 M KOH)  
[1:03:20] Stepping pH = 7.99  
[1:03:35] Stirrer speed set to 0  
[1:04:35] Datapoint id 64 collected  
[1:04:35] Charge balance equation is out by -269.2%  
[1:04:35] Stirrer speed set to 55  
[1:04:40] pH 8.03 -> 8.23  
[1:04:40] Using cautious pH adjust  
[1:04:40] Dispensed 0.000024 mL of Base (0.5 M KOH)  
[1:04:45] Stepping pH = 8.10  
[1:04:45] Dispensed 0.000024 mL of Base (0.5 M KOH)  
[1:04:50] Stepping pH = 8.18  
[1:04:50] Dispensed 0.000024 mL of Base (0.5 M KOH)  
[1:04:55] Stepping pH = 8.27  
[1:05:10] Stirrer speed set to 0  
[1:05:35] Datapoint id 65 collected  
[1:05:35] Charge balance equation is out by -326.7%  
[1:05:35] Stirrer speed set to 55  
[1:05:40] pH 8.29 -> 8.49  
[1:05:40] Using cautious pH adjust  
[1:05:40] Dispensed 0.000024 mL of Base (0.5 M KOH)  
[1:05:45] Stepping pH = 8.32  
[1:05:45] Dispensed 0.000024 mL of Base (0.5 M KOH)  
[1:05:50] Stepping pH = 8.36  
[1:05:51] Dispensed 0.000047 mL of Base (0.5 M KOH)  
[1:05:56] Stepping pH = 8.37  
[1:05:56] Dispensed 0.000094 mL of Base (0.5 M KOH)  
[1:06:01] Stepping pH = 8.53  
[1:06:16] Stirrer speed set to 0  
[1:06:45] Datapoint id 66 collected  
[1:06:45] Charge balance equation is out by -901.8%  
[1:06:45] Stirrer speed set to 55  
[1:06:50] pH 8.59 -> 8.79  
[1:06:50] Using cautious pH adjust  
[1:06:50] Dispensed 0.000024 mL of Base (0.5 M KOH)  
[1:06:55] Stepping pH = 8.62  
[1:06:55] Dispensed 0.000024 mL of Base (0.5 M KOH)  
[1:07:00] Stepping pH = 8.66

Sample name: **M15\_octanol**  
Assay name: **pH-metric high logP**  
Assay ID: **18C-01005**  
Filename: **C:\Sirius\_T3\Mehtap\20180228\_exp28\_logP\_T3-2\18C-01005\_M15\_octanol\_pH-metric high logP.t3r**

Experiment start time: **3/1/2018 6:16:08 AM**  
Analyst: **Pion**  
Instrument ID: **T312060**

## Experiment Log (continued)

[1:07:00] Dispensed 0.000047 mL of Base (0.5 M KOH)  
[1:07:05] Stepping pH = 8.73  
[1:07:05] Dispensed 0.000024 mL of Base (0.5 M KOH)  
[1:07:11] Stepping pH = 8.78  
[1:07:26] Stirrer speed set to 0  
[1:07:42] Datapoint id 67 collected  
[1:07:42] Charge balance equation is out by -378.7%  
[1:07:42] Stirrer speed set to 55  
[1:07:47] pH 8.81 -> 9.01  
[1:07:47] Using cautious pH adjust  
[1:07:47] Dispensed 0.000024 mL of Base (0.5 M KOH)  
[1:07:52] Stepping pH = 8.81  
[1:07:53] Dispensed 0.000118 mL of Base (0.5 M KOH)  
[1:07:58] Stepping pH = 8.81  
[1:07:58] Dispensed 0.000564 mL of Base (0.5 M KOH)  
[1:08:03] Stepping pH = 9.06  
[1:08:18] Stirrer speed set to 0  
[1:08:32] Datapoint id 68 collected  
[1:08:32] Charge balance equation is out by -1,458.4%  
[1:08:32] Stirrer speed set to 55  
[1:08:37] pH 9.20 -> 9.40  
[1:08:37] Using cautious pH adjust  
[1:08:37] Dispensed 0.000047 mL of Base (0.5 M KOH)  
[1:08:42] Stepping pH = 9.21  
[1:08:42] Dispensed 0.000141 mL of Base (0.5 M KOH)  
[1:08:47] Stepping pH = 9.28  
[1:08:47] Dispensed 0.000165 mL of Base (0.5 M KOH)  
[1:08:53] Stepping pH = 9.44  
[1:09:08] Stirrer speed set to 0  
[1:09:26] Datapoint id 69 collected  
[1:09:26] Charge balance equation is out by -266.5%  
[1:09:26] Stirrer speed set to 55  
[1:09:31] pH 9.51 -> 9.71  
[1:09:31] Using cautious pH adjust  
[1:09:31] Dispensed 0.000094 mL of Base (0.5 M KOH)  
[1:09:36] Stepping pH = 9.51  
[1:09:36] Dispensed 0.000282 mL of Base (0.5 M KOH)  
[1:09:41] Stepping pH = 9.70  
[1:09:56] Stirrer speed set to 0  
[1:10:09] Datapoint id 70 collected  
[1:10:09] Charge balance equation is out by -98.1%  
[1:10:09] Stirrer speed set to 55  
[1:10:14] pH 9.79 -> 9.99  
[1:10:14] Using cautious pH adjust  
[1:10:14] Dispensed 0.000165 mL of Base (0.5 M KOH)  
[1:10:19] Stepping pH = 9.80  
[1:10:19] Dispensed 0.000447 mL of Base (0.5 M KOH)  
[1:10:24] Stepping pH = 10.04  
[1:10:39] Stirrer speed set to 0  
[1:10:49] Datapoint id 71 collected  
[1:10:49] Charge balance equation is out by -90.6%  
[1:10:49] Titration 3 of 3  
[1:10:49] Adding initial titrants  
[1:10:49] Automatically add 0.30000 mL of Octanol  
[1:10:56] Dispensed 0.300000 mL of Octanol  
[1:10:56] Stirrer speed set to 10  
[1:10:58] Stirrer speed set to 60  
[1:10:58] Iterative adjust 10.07 -> 2.00  
[1:10:58] pH 10.07 -> 2.00



Sample name: **M15\_octanol**  
Assay name: **pH-metric high logP**  
Assay ID: **18C-01005**  
Filename: **C:\Sirius\_T3\Mehtap\20180228\_exp28\_logP\_T3-2\18C-01005\_M15\_octanol\_pH-metric high logP.t3r**

Experiment start time: **3/1/2018 6:16:08 AM**  
Analyst: **Pion**  
Instrument ID: **T312060**

## Experiment Log (continued)

[1:11:00] Dispensed 0.100000 mL of Acid (0.5 M HCl)  
[1:11:05] pH 2.05 -> 2.00  
[1:11:05] Dispensed 0.007996 mL of Acid (0.5 M HCl)  
[1:11:56] Stirrer speed set to 0  
[1:12:06] Datapoint id 72 collected  
[1:12:06] Stirrer speed set to 60  
[1:12:11] pH 1.98 -> 2.18  
[1:12:11] Using cautious pH adjust  
[1:12:11] Dispensed 0.015334 mL of Base (0.5 M KOH)  
[1:12:16] Stepping pH = 2.06  
[1:12:17] Dispensed 0.011900 mL of Base (0.5 M KOH)  
[1:12:22] Stepping pH = 2.16  
[1:12:22] Dispensed 0.001834 mL of Base (0.5 M KOH)  
[1:12:27] Stepping pH = 2.18  
[1:12:42] Stirrer speed set to 0  
[1:12:52] Datapoint id 73 collected  
[1:12:52] Charge balance equation is out by 5.2%  
[1:12:52] Stirrer speed set to 60  
[1:12:57] pH 2.19 -> 2.39  
[1:12:57] Using charge balance adjust  
[1:12:58] Dispensed 0.019450 mL of Base (0.5 M KOH)  
[1:13:18] Stirrer speed set to 0  
[1:13:28] Datapoint id 74 collected  
[1:13:28] Charge balance equation is out by 10.4%  
[1:13:28] Stirrer speed set to 60  
[1:13:33] pH 2.42 -> 2.62  
[1:13:33] Using charge balance adjust  
[1:13:34] Dispensed 0.012676 mL of Base (0.5 M KOH)  
[1:13:54] Stirrer speed set to 0  
[1:14:04] Datapoint id 75 collected  
[1:14:04] Charge balance equation is out by 3.9%  
[1:14:04] Stirrer speed set to 60  
[1:14:09] pH 2.63 -> 2.83  
[1:14:09] Using charge balance adjust  
[1:14:09] Dispensed 0.008843 mL of Base (0.5 M KOH)  
[1:14:29] Stirrer speed set to 0  
[1:14:39] Datapoint id 76 collected  
[1:14:39] Charge balance equation is out by 9.8%  
[1:14:39] Stirrer speed set to 60  
[1:14:45] pH 2.86 -> 3.06  
[1:14:45] Using charge balance adjust  
[1:14:45] Dispensed 0.006256 mL of Base (0.5 M KOH)  
[1:15:05] Stirrer speed set to 0  
[1:15:15] Datapoint id 77 collected  
[1:15:15] Charge balance equation is out by -0.7%  
[1:15:15] Stirrer speed set to 60  
[1:15:20] pH 3.06 -> 3.26  
[1:15:20] Using charge balance adjust  
[1:15:20] Dispensed 0.004704 mL of Base (0.5 M KOH)  
[1:15:41] Stirrer speed set to 0  
[1:15:51] Datapoint id 78 collected  
[1:15:51] Charge balance equation is out by 11.5%  
[1:15:51] Stirrer speed set to 60  
[1:15:56] pH 3.28 -> 3.48  
[1:15:56] Using charge balance adjust  
[1:15:56] Dispensed 0.003622 mL of Base (0.5 M KOH)  
[1:16:16] Stirrer speed set to 0  
[1:16:26] Datapoint id 79 collected  
[1:16:26] Charge balance equation is out by 4.3%

Sample name: **M15\_octanol**  
Assay name: **pH-metric high logP**  
Assay ID: **18C-01005**  
Filename: **C:\Sirius\_T3\Mehtap\20180228\_exp28\_logP\_T3-2\18C-01005\_M15\_octanol\_pH-metric high logP.t3r**

Experiment start time: **3/1/2018 6:16:08 AM**  
Analyst: **Pion**  
Instrument ID: **T312060**

## Experiment Log (continued)

[1:16:26] Stirrer speed set to 60  
[1:16:31] pH 3.50 -> 3.70  
[1:16:31] Using charge balance adjust  
[1:16:31] Dispensed 0.003057 mL of Base (0.5 M KOH)  
[1:16:52] Stirrer speed set to 0  
[1:17:02] Datapoint id 80 collected  
[1:17:02] Charge balance equation is out by 17.0%  
[1:17:02] Stirrer speed set to 60  
[1:17:07] pH 3.73 -> 3.93  
[1:17:07] Using cautious pH adjust  
[1:17:07] Dispensed 0.001411 mL of Base (0.5 M KOH)  
[1:17:12] Stepping pH = 3.83  
[1:17:12] Dispensed 0.001011 mL of Base (0.5 M KOH)  
[1:17:17] Stepping pH = 3.91  
[1:17:17] Dispensed 0.000188 mL of Base (0.5 M KOH)  
[1:17:22] Stepping pH = 3.93  
[1:17:37] Stirrer speed set to 0  
[1:17:48] Datapoint id 81 collected  
[1:17:48] Charge balance equation is out by 7.0%  
[1:17:48] Stirrer speed set to 60  
[1:17:53] pH 3.92 -> 4.12  
[1:17:53] Using charge balance adjust  
[1:17:53] Dispensed 0.002752 mL of Base (0.5 M KOH)  
[1:18:13] Stirrer speed set to 0  
[1:18:23] Datapoint id 82 collected  
[1:18:23] Charge balance equation is out by 8.4%  
[1:18:23] Stirrer speed set to 60  
[1:18:29] pH 4.14 -> 4.34  
[1:18:29] Using charge balance adjust  
[1:18:29] Dispensed 0.002611 mL of Base (0.5 M KOH)  
[1:18:49] Stirrer speed set to 0  
[1:18:59] Datapoint id 83 collected  
[1:18:59] Charge balance equation is out by 20.8%  
[1:18:59] Stirrer speed set to 60  
[1:19:04] pH 4.38 -> 4.58  
[1:19:04] Using cautious pH adjust  
[1:19:04] Dispensed 0.001152 mL of Base (0.5 M KOH)  
[1:19:09] Stepping pH = 4.47  
[1:19:09] Dispensed 0.000847 mL of Base (0.5 M KOH)  
[1:19:15] Stepping pH = 4.56  
[1:19:15] Dispensed 0.000141 mL of Base (0.5 M KOH)  
[1:19:20] Stepping pH = 4.58  
[1:19:35] Stirrer speed set to 0  
[1:19:45] Datapoint id 84 collected  
[1:19:45] Charge balance equation is out by 7.2%  
[1:19:45] Stirrer speed set to 60  
[1:19:50] pH 4.57 -> 4.77  
[1:19:50] Using charge balance adjust  
[1:19:50] Dispensed 0.001929 mL of Base (0.5 M KOH)  
[1:20:10] Stirrer speed set to 0  
[1:20:20] Datapoint id 85 collected  
[1:20:20] Charge balance equation is out by -8.5%  
[1:20:20] Stirrer speed set to 60  
[1:20:25] pH 4.75 -> 4.95  
[1:20:25] Using charge balance adjust  
[1:20:26] Dispensed 0.001505 mL of Base (0.5 M KOH)  
[1:20:46] Stirrer speed set to 0  
[1:20:56] Datapoint id 86 collected  
[1:20:56] Charge balance equation is out by -4.5%



Sample name: **M15\_octanol**  
Assay name: **pH-metric high logP**  
Assay ID: **18C-01005**  
Filename: **C:\Sirius\_T3\Mehtap\20180228\_exp28\_logP\_T3-2\18C-01005\_M15\_octanol\_pH-metric high logP.t3r**

Experiment start time: **3/1/2018 6:16:08 AM**  
Analyst: **Pion**  
Instrument ID: **T312060**

## Experiment Log (continued)

[1:20:56] Stirrer speed set to 60  
[1:21:01] pH 4.95 -> 5.15  
[1:21:01] Using charge balance adjust  
[1:21:01] Dispensed 0.001129 mL of Base (0.5 M KOH)  
[1:21:22] Stirrer speed set to 0  
[1:21:32] Datapoint id 87 collected  
[1:21:32] Charge balance equation is out by -5.7%  
[1:21:32] Stirrer speed set to 60  
[1:21:37] pH 5.14 -> 5.34  
[1:21:37] Using charge balance adjust  
[1:21:37] Dispensed 0.000800 mL of Base (0.5 M KOH)  
[1:21:58] Stirrer speed set to 0  
[1:22:09] Datapoint id 88 collected  
[1:22:09] Charge balance equation is out by -0.8%  
[1:22:09] Stirrer speed set to 60  
[1:22:14] pH 5.34 -> 5.54  
[1:22:14] Using charge balance adjust  
[1:22:14] Dispensed 0.000541 mL of Base (0.5 M KOH)  
[1:22:34] Stirrer speed set to 0  
[1:22:46] Datapoint id 89 collected  
[1:22:46] Charge balance equation is out by 1.2%  
[1:22:46] Stirrer speed set to 60  
[1:22:51] pH 5.55 -> 5.75  
[1:22:51] Using charge balance adjust  
[1:22:51] Dispensed 0.000376 mL of Base (0.5 M KOH)  
[1:23:11] Stirrer speed set to 0  
[1:23:29] Datapoint id 90 collected  
[1:23:29] Charge balance equation is out by 9.5%  
[1:23:29] Stirrer speed set to 60  
[1:23:34] pH 5.77 -> 5.97  
[1:23:34] Using charge balance adjust  
[1:23:34] Dispensed 0.000259 mL of Base (0.5 M KOH)  
[1:23:54] Stirrer speed set to 0  
[1:24:16] Datapoint id 91 collected  
[1:24:16] Charge balance equation is out by 7.6%  
[1:24:16] Stirrer speed set to 60  
[1:24:22] pH 6.00 -> 6.20  
[1:24:22] Using charge balance adjust  
[1:24:22] Dispensed 0.000188 mL of Base (0.5 M KOH)  
[1:24:42] Stirrer speed set to 0  
[1:25:12] Datapoint id 92 collected  
[1:25:12] Charge balance equation is out by 18.0%  
[1:25:12] Stirrer speed set to 60  
[1:25:18] pH 6.23 -> 6.43  
[1:25:18] Using cautious pH adjust  
[1:25:18] Dispensed 0.000071 mL of Base (0.5 M KOH)  
[1:25:23] Stepping pH = 6.29  
[1:25:23] Dispensed 0.000094 mL of Base (0.5 M KOH)  
[1:25:28] Stepping pH = 6.50  
[1:25:43] Stirrer speed set to 0  
[1:26:43] Datapoint id 93 collected  
[1:26:43] Charge balance equation is out by -15.4%  
[1:26:43] Stirrer speed set to 60  
[1:26:48] pH 6.54 -> 6.74  
[1:26:48] Using cautious pH adjust  
[1:26:48] Dispensed 0.000047 mL of Base (0.5 M KOH)  
[1:26:53] Stepping pH = 6.63  
[1:26:53] Dispensed 0.000047 mL of Base (0.5 M KOH)  
[1:26:58] Stepping pH = 6.80

Sample name: **M15\_octanol**  
Assay name: **pH-metric high logP**  
Assay ID: **18C-01005**  
Filename: **C:\Sirius\_T3\Mehtap\20180228\_exp28\_logP\_T3-2\18C-01005\_M15\_octanol\_pH-metric high logP.t3r**

Experiment start time: **3/1/2018 6:16:08 AM**  
Analyst: **Pion**  
Instrument ID: **T312060**

## Experiment Log (continued)

[1:27:14] Stirrer speed set to 0  
[1:28:14] Datapoint id 94 collected  
[1:28:14] Charge balance equation is out by 12.0%  
[1:28:14] Stirrer speed set to 60  
[1:28:19] pH 6.78 -> 6.98  
[1:28:19] Using charge balance adjust  
[1:28:19] Dispensed 0.000071 mL of Base (0.5 M KOH)  
[1:28:39] Stirrer speed set to 0  
[1:29:39] Datapoint id 95 collected  
[1:29:39] Charge balance equation is out by -11.1%  
[1:29:39] Stirrer speed set to 60  
[1:29:44] pH 6.97 -> 7.17  
[1:29:44] Using charge balance adjust  
[1:29:44] Dispensed 0.000047 mL of Base (0.5 M KOH)  
[1:30:04] Stirrer speed set to 0  
[1:30:15] Datapoint id 96 collected  
[1:30:15] Charge balance equation is out by -76.1%  
[1:30:15] Stirrer speed set to 60  
[1:30:20] pH 6.91 -> 7.11  
[1:30:20] Using cautious pH adjust  
[1:30:20] Dispensed 0.000024 mL of Base (0.5 M KOH)  
[1:30:25] Stepping pH = 6.90  
[1:30:25] Dispensed 0.000141 mL of Base (0.5 M KOH)  
[1:30:30] Stepping pH = 7.91  
[1:30:45] Stirrer speed set to 0  
[1:31:45] Datapoint id 97 collected  
[1:31:45] Charge balance equation is out by -214.0%  
[1:31:45] Stirrer speed set to 60  
[1:31:50] pH 8.09 -> 8.29  
[1:31:50] Using cautious pH adjust  
[1:31:51] Dispensed 0.000024 mL of Base (0.5 M KOH)  
[1:31:56] Stepping pH = 8.14  
[1:31:56] Dispensed 0.000024 mL of Base (0.5 M KOH)  
[1:32:01] Stepping pH = 8.14  
[1:32:01] Dispensed 0.000071 mL of Base (0.5 M KOH)  
[1:32:06] Stepping pH = 8.36  
[1:32:21] Stirrer speed set to 0  
[1:32:45] Datapoint id 98 collected  
[1:32:45] Charge balance equation is out by -580.1%  
[1:32:45] Stirrer speed set to 60  
[1:32:50] pH 8.43 -> 8.63  
[1:32:50] Using cautious pH adjust  
[1:32:50] Dispensed 0.000024 mL of Base (0.5 M KOH)  
[1:32:55] Stepping pH = 8.45  
[1:32:55] Dispensed 0.000024 mL of Base (0.5 M KOH)  
[1:33:00] Stepping pH = 8.48  
[1:33:00] Dispensed 0.000071 mL of Base (0.5 M KOH)  
[1:33:05] Stepping pH = 8.61  
[1:33:05] Dispensed 0.000024 mL of Base (0.5 M KOH)  
[1:33:10] Stepping pH = 8.68  
[1:33:25] Stirrer speed set to 0  
[1:33:41] Datapoint id 99 collected  
[1:33:41] Charge balance equation is out by -464.7%  
[1:33:41] Stirrer speed set to 60  
[1:33:46] pH 8.69 -> 8.89  
[1:33:46] Using cautious pH adjust  
[1:33:46] Dispensed 0.000024 mL of Base (0.5 M KOH)  
[1:33:51] Stepping pH = 8.71  
[1:33:51] Dispensed 0.000047 mL of Base (0.5 M KOH)

Sample name: **M15\_octanol**  
Assay name: **pH-metric high logP**  
Assay ID: **18C-01005**  
Filename: **C:\Sirius\_T3\Mehtap\20180228\_exp28\_logP\_T3-2\18C-01005\_M15\_octanol\_pH-metric high logP.t3r**

Experiment start time: **3/1/2018 6:16:08 AM**  
Analyst: **Pion**  
Instrument ID: **T312060**

## Experiment Log (continued)

[1:33:56] Stepping pH = 8.77  
[1:33:56] Dispensed 0.000071 mL of Base (0.5 M KOH)  
[1:34:01] Stepping pH = 8.90  
[1:34:17] Stirrer speed set to 0  
[1:34:31] Datapoint id 100 collected  
[1:34:31] Charge balance equation is out by -252.1%  
[1:34:31] Stirrer speed set to 60  
[1:34:36] pH 8.96 -> 9.16  
[1:34:36] Using cautious pH adjust  
[1:34:36] Dispensed 0.000024 mL of Base (0.5 M KOH)  
[1:34:41] Stepping pH = 8.98  
[1:34:41] Dispensed 0.000094 mL of Base (0.5 M KOH)  
[1:34:46] Stepping pH = 9.09  
[1:34:46] Dispensed 0.000071 mL of Base (0.5 M KOH)  
[1:34:52] Stepping pH = 9.18  
[1:35:07] Stirrer speed set to 0  
[1:35:20] Datapoint id 101 collected  
[1:35:20] Charge balance equation is out by -179.3%  
[1:35:20] Stirrer speed set to 60  
[1:35:25] pH 9.23 -> 9.43  
[1:35:25] Using cautious pH adjust  
[1:35:25] Dispensed 0.000047 mL of Base (0.5 M KOH)  
[1:35:30] Stepping pH = 9.24  
[1:35:30] Dispensed 0.000165 mL of Base (0.5 M KOH)  
[1:35:35] Stepping pH = 9.36  
[1:35:35] Dispensed 0.000071 mL of Base (0.5 M KOH)  
[1:35:40] Stepping pH = 9.43  
[1:35:55] Stirrer speed set to 0  
[1:36:07] Datapoint id 102 collected  
[1:36:07] Charge balance equation is out by -161.3%  
[1:36:07] Stirrer speed set to 60  
[1:36:12] pH 9.46 -> 9.66  
[1:36:12] Using cautious pH adjust  
[1:36:12] Dispensed 0.000094 mL of Base (0.5 M KOH)  
[1:36:17] Stepping pH = 9.47  
[1:36:17] Dispensed 0.000259 mL of Base (0.5 M KOH)  
[1:36:22] Stepping pH = 9.67  
[1:36:38] Stirrer speed set to 0  
[1:36:49] Datapoint id 103 collected  
[1:36:49] Charge balance equation is out by -94.3%  
[1:36:49] Stirrer speed set to 60  
[1:36:54] pH 9.73 -> 9.93  
[1:36:54] Using cautious pH adjust  
[1:36:54] Dispensed 0.000141 mL of Base (0.5 M KOH)  
[1:36:59] Stepping pH = 9.76  
[1:36:59] Dispensed 0.000306 mL of Base (0.5 M KOH)  
[1:37:05] Stepping pH = 9.91  
[1:37:05] Dispensed 0.000047 mL of Base (0.5 M KOH)  
[1:37:10] Stepping pH = 9.95  
[1:37:25] Stirrer speed set to 0  
[1:37:36] Datapoint id 104 collected  
[1:37:36] Charge balance equation is out by -63.7%  
[1:37:36] Stirrer speed set to 60  
[1:37:41] pH 9.97 -> 10.05  
[1:37:41] Using cautious pH adjust  
[1:37:41] Dispensed 0.000094 mL of Base (0.5 M KOH)  
[1:37:46] Stepping pH = 9.98  
[1:37:46] Dispensed 0.000165 mL of Base (0.5 M KOH)  
[1:37:51] Stepping pH = 10.04

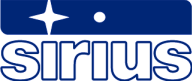

## Experiment Log

Sample name: **M15\_octanol** Experiment start time: **3/1/2018 6:16:08 AM**  
Assay name: **pH-metric high logP** Analyst: **Pion**  
Assay ID: **18C-01005** Instrument ID: **T312060**  
Filename: **C:\Sirius\_T3\Mehtap\20180228\_exp28\_logP\_T3-2\18C-01005\_M15\_octanol\_pH-metric high logP.t3r**

### Experiment Log (continued)

[1:38:06] Stirrer speed set to 0  
[1:38:17] Datapoint id 105 collected  
[1:38:17] Charge balance equation is out by -43.3%  
[1:38:17] Argon flow rate set to 0  
[1:38:21] Titrator arm moved over Titration position
