# Supplementary material for: Octanol-water partition coefficient measurements for the SAMPL6 Blind Prediction Challenge
Source: bioRxiv or medRxiv preprint supplement (doi:10.1101/757393), 2019-12-02
Supplement: Supplementary file [file media-2.zip]

Sample name: **M11\_octanol**  
 Assay name: **pH-metric high logP**  
 Assay ID: **18B-27016**  
 Filename: **C:\Sirius\_T3\Mehtap\20180227\_exp27\_logP\_T3-2\18B-27016\_M11\_octanol\_pH-metric high logP.t3r**

Experiment start time: **2/27/2018 10:54:30 PM**  
 Analyst: **Pion**  
 Instrument ID: **T312060**

## pH-metric Result

logP (XH +) -5.60 ±1.55 (n=48)  
 logP (neutral X) 2.09 ±0.01 (n=48)

### 18B-27016 Points 1 to 20

M11\_octanol concentration factor 0.990  
 Carbonate 0.0000 mM  
 Acidity error 0.67760 mM

### 18B-27016 Points 21 to 40

M11\_octanol concentration factor 0.815  
 Carbonate 0.0822 mM  
 Acidity error 0.32858 mM

### 18B-27016 Points 41 to 62

M11\_octanol concentration factor 0.703  
 Carbonate 0.1416 mM  
 Acidity error 0.69165 mM

## Warnings and errors

Errors None  
 Warnings One or more logP values out of range

## Sample logD and percent species

| pH     | M11_octanol<br>logD | M11_octanol<br>M11_octanolH | M11_octanol<br>M11_octanol | M11_octanol<br>M11_octanolH* | M11_octanol<br>M11_octanol* | Comment    |
|--------|---------------------|-----------------------------|----------------------------|------------------------------|-----------------------------|------------|
| 1.000  | -0.80               | 86.28 %                     | 0.11 %                     | 0.00 %                       | 13.61 %                     | Stomach pH |
| 1.200  | -0.60               | 79.87 %                     | 0.16 %                     | 0.00 %                       | 19.97 %                     |            |
| 2.000  | 0.19                | 38.61 %                     | 0.50 %                     | 0.00 %                       | 60.90 %                     |            |
| 3.000  | 1.15                | 5.92 %                      | 0.76 %                     | 0.00 %                       | 93.32 %                     |            |
| 4.000  | 1.84                | 0.62 %                      | 0.81 %                     | 0.00 %                       | 98.57 %                     |            |
| 5.000  | 2.06                | 0.06 %                      | 0.81 %                     | 0.00 %                       | 99.13 %                     | Blood pH   |
| 6.000  | 2.08                | 0.01 %                      | 0.81 %                     | 0.00 %                       | 99.18 %                     |            |
| 6.500  | 2.09                | 0.00 %                      | 0.81 %                     | 0.00 %                       | 99.19 %                     |            |
| 7.000  | 2.09                | 0.00 %                      | 0.81 %                     | 0.00 %                       | 99.19 %                     |            |
| 7.400  | 2.09                | 0.00 %                      | 0.81 %                     | 0.00 %                       | 99.19 %                     |            |
| 8.000  | 2.09                | 0.00 %                      | 0.81 %                     | 0.00 %                       | 99.19 %                     |            |
| 9.000  | 2.09                | 0.00 %                      | 0.81 %                     | 0.00 %                       | 99.19 %                     |            |
| 10.000 | 2.09                | 0.00 %                      | 0.81 %                     | 0.00 %                       | 99.19 %                     |            |
| 11.000 | 2.09                | 0.00 %                      | 0.81 %                     | 0.00 %                       | 99.19 %                     |            |
| 12.000 | 2.09                | 0.00 %                      | 0.81 %                     | 0.00 %                       | 99.19 %                     |            |

Sample name: **M11\_octanol**  
 Assay name: **pH-metric high logP**  
 Assay ID: **18B-27016**  
 Filename: **C:\Sirius\_T3\Mehtap\20180227\_exp27\_logP\_T3-2\18B-27016\_M11\_octanol\_pH-metric high logP.t3r**

Experiment start time: **2/27/2018 10:54:30 PM**  
 Analyst: **Pion**  
 Instrument ID: **T312060**

## Graphs

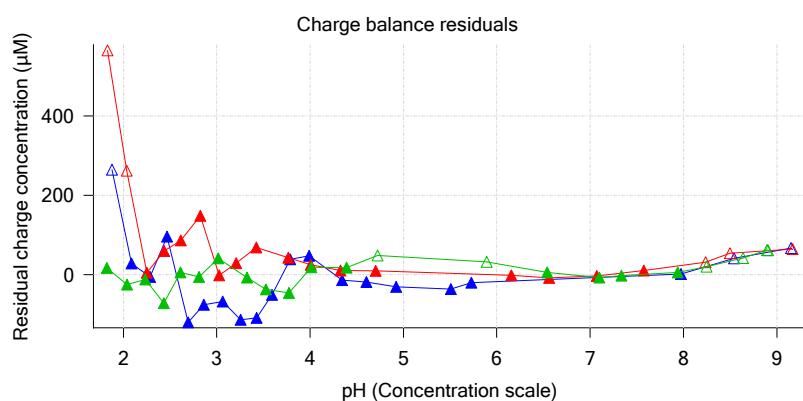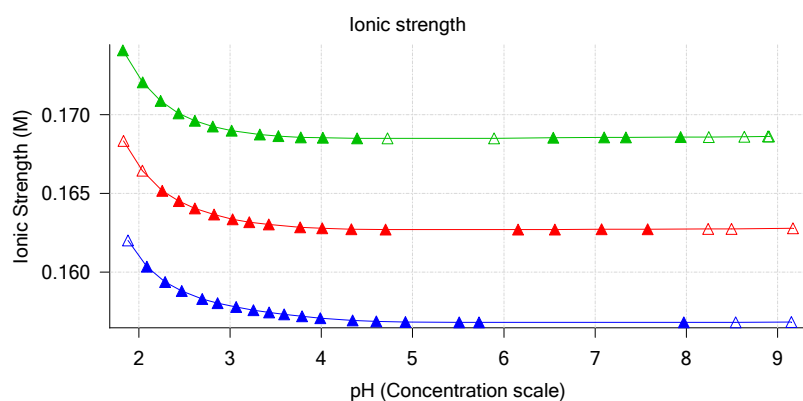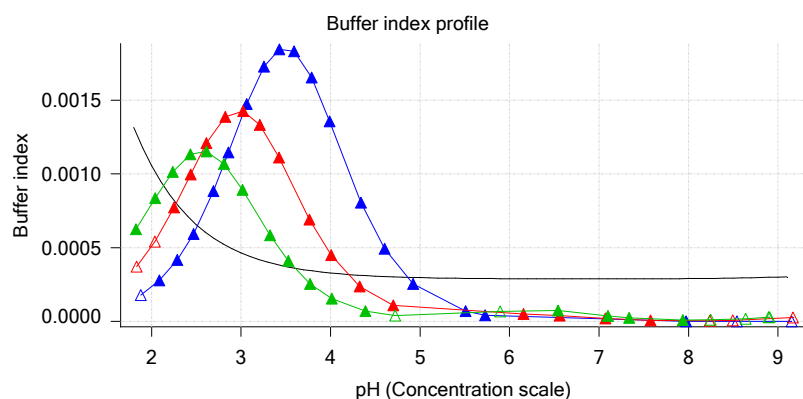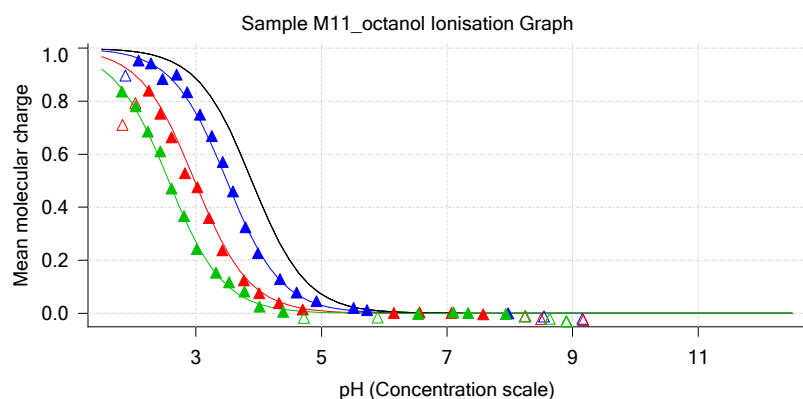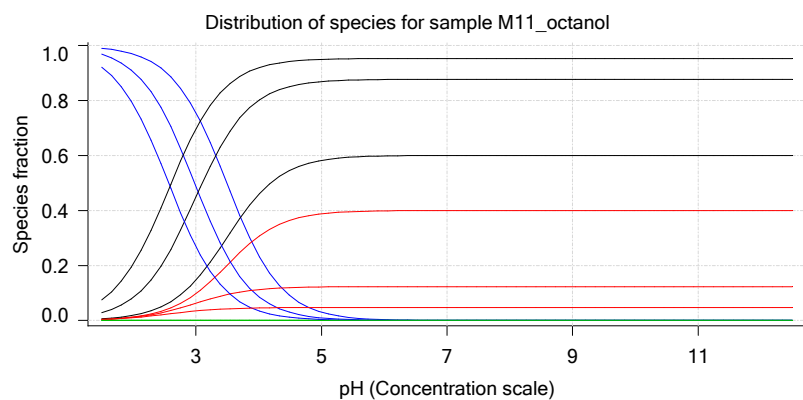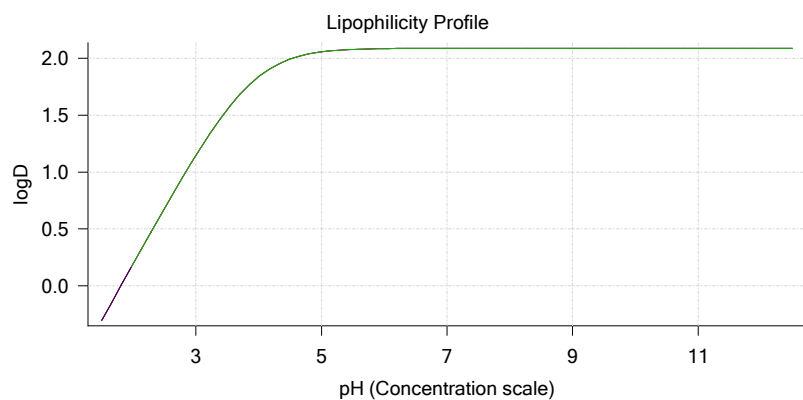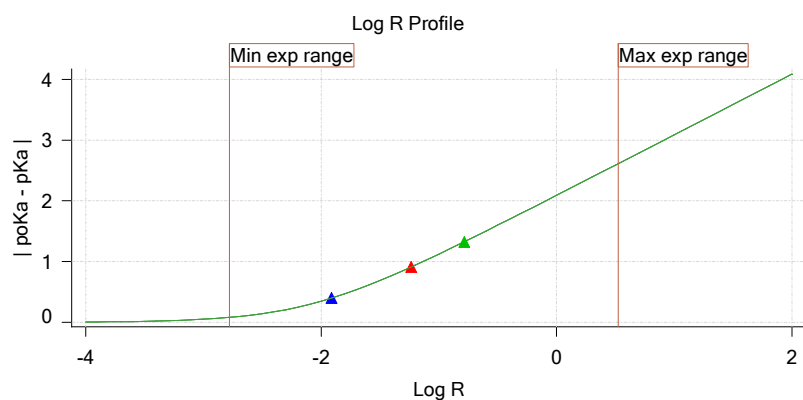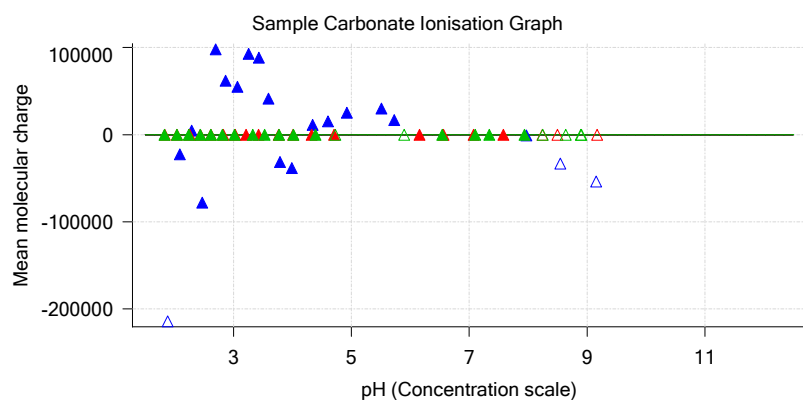

Sample name: **M11\_octanol**  
 Assay name: **pH-metric high logP**  
 Assay ID: **18B-27016**  
 Filename: **C:\Sirius\_T3\Mehtap\20180227\_exp27\_logP\_T3-2\18B-27016\_M11\_octanol\_pH-metric high logP.t3r**

Experiment start time: **2/27/2018 10:54:30 PM**  
 Analyst: **Pion**  
 Instrument ID: **T312060**

## Graphs (continued)

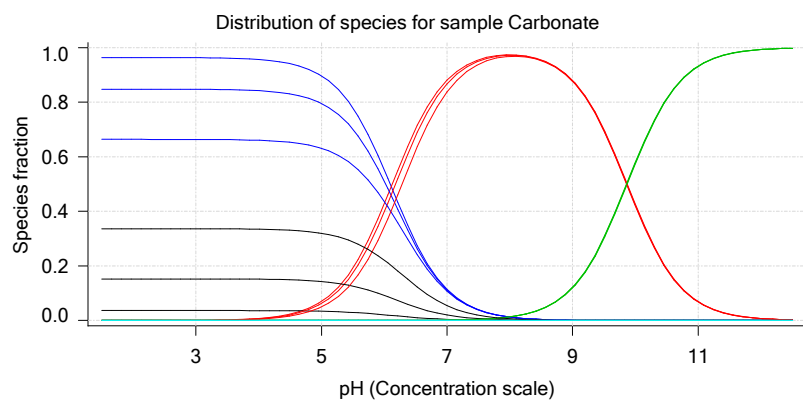

Sample name: **M11\_octanol**  
 Assay name: **pH-metric high logP**  
 Assay ID: **18B-27016**  
 Filename: **C:\Sirius\_T3\Mehtap\20180227\_exp27\_logP\_T3-2\18B-27016\_M11\_octanol\_pH-metric high logP.t3r**

Experiment start time: **2/27/2018 10:54:30 PM**  
 Analyst: **Pion**  
 Instrument ID: **T312060**

## pH-metric high logP Titration 1 of 3 18B-27016 Points 1 to 20

### Overall results

RMSD 0.163  
 Average ionic strength 0.158 M  
 Average temperature 25.0°C  
 Partition ratio 0.0123 : 1  
 Analyte concentration range 3203.9 µM to 3307.2 µM  
 Total points considered 17 of 20

### Warnings and errors

Errors None  
 Warnings None

### Four-Plus parameters

 Alpha 0.130 2/27/2018 10:54:30 PM C:\Sirius\_T3\HCl18B27.t3r  
 S 0.9970 2/27/2018 10:54:30 PM C:\Sirius\_T3\HCl18B27.t3r  
 jH 0.8 2/27/2018 10:54:30 PM C:\Sirius\_T3\HCl18B27.t3r  
 jOH -0.4 2/27/2018 10:54:30 PM C:\Sirius\_T3\HCl18B27.t3r

### Titriments

 0.50 M HCl 0.993513 2/27/2018 10:54:30 PM C:\Sirius\_T3\HCl18B27.t3r  
 0.50 M KOH 0.999845 2/27/2018 10:54:30 PM C:\Sirius\_T3\KOH18B27.t3r

### Sample

 M11\_octanol concentration factor 0.990  
 Base pKa 1 3.89  
 logP (XH +) -0.58  
 logP (neutral X) 2.04

### Sample graphs

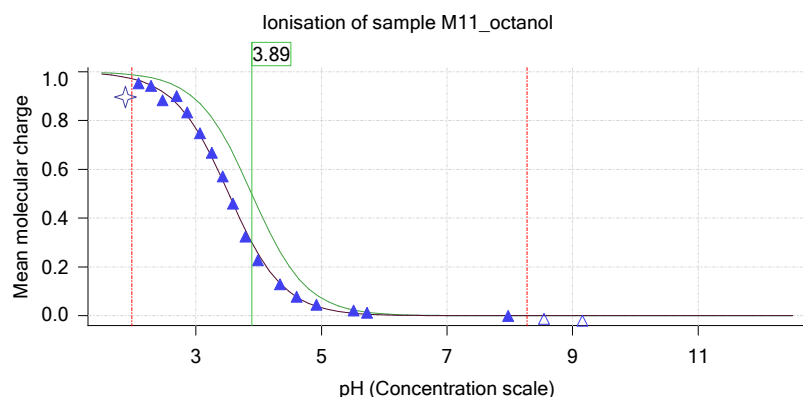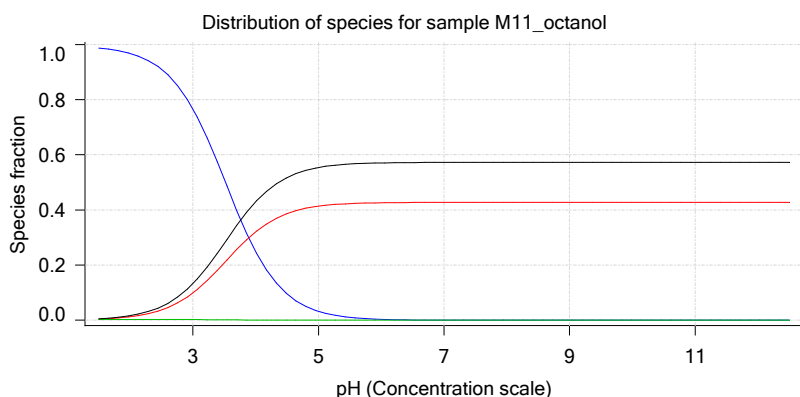

Sample name: **M11\_octanol**  
 Assay name: **pH-metric high logP**  
 Assay ID: **18B-27016**  
 Filename: **C:\Sirius\_T3\Mehtap\20180227\_exp27\_logP\_T3-2\18B-27016\_M11\_octanol\_pH-metric high logP.t3r**

Experiment start time: **2/27/2018 10:54:30 PM**  
 Analyst: **Pion**  
 Instrument ID: **T312060**

## Sample graphs (continued)

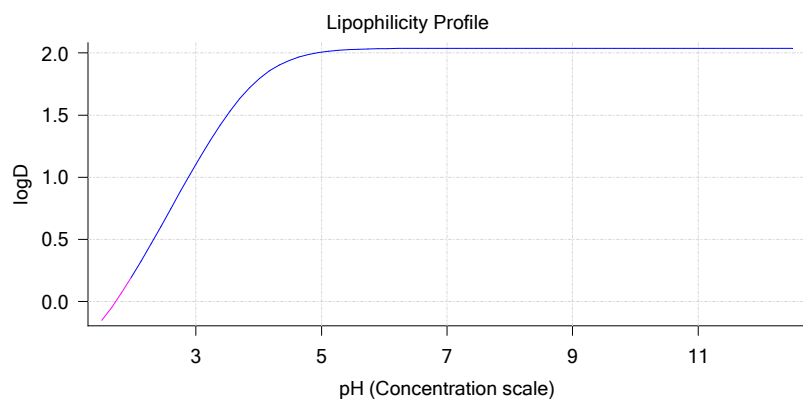

## Sample logD and percent species

| pH     | M11_octanol<br>logD | M11_octanol<br>M11_octanolH | M11_octanol<br>M11_octanolH | M11_octanol<br>M11_octanolH* | M11_octanol<br>M11_octanol* | Comment    |
|--------|---------------------|-----------------------------|-----------------------------|------------------------------|-----------------------------|------------|
| 1.000  | -0.40               | 99.38 %                     | 0.13 %                      | 0.32 %                       | 0.17 %                      | Stomach pH |
| 1.200  | -0.31               | 99.21 %                     | 0.20 %                      | 0.32 %                       | 0.27 %                      |            |
| 2.000  | 0.22                | 96.77 %                     | 1.25 %                      | 0.31 %                       | 1.67 %                      |            |
| 3.000  | 1.10                | 76.66 %                     | 9.88 %                      | 0.25 %                       | 13.22 %                     |            |
| 4.000  | 1.79                | 24.90 %                     | 32.08 %                     | 0.08 %                       | 42.94 %                     |            |
| 5.000  | 2.01                | 3.21 %                      | 41.38 %                     | 0.01 %                       | 55.40 %                     | Blood pH   |
| 6.000  | 2.03                | 0.33 %                      | 42.61 %                     | 0.00 %                       | 57.05 %                     |            |
| 6.500  | 2.04                | 0.10 %                      | 42.71 %                     | 0.00 %                       | 57.18 %                     |            |
| 7.000  | 2.04                | 0.03 %                      | 42.74 %                     | 0.00 %                       | 57.22 %                     |            |
| 7.400  | 2.04                | 0.01 %                      | 42.75 %                     | 0.00 %                       | 57.24 %                     |            |
| 8.000  | 2.04                | 0.00 %                      | 42.76 %                     | 0.00 %                       | 57.24 %                     |            |
| 9.000  | 2.04                | 0.00 %                      | 42.76 %                     | 0.00 %                       | 57.24 %                     |            |
| 10.000 | 2.04                | 0.00 %                      | 42.76 %                     | 0.00 %                       | 57.24 %                     |            |
| 11.000 | 2.04                | 0.00 %                      | 42.76 %                     | 0.00 %                       | 57.24 %                     |            |
| 12.000 | 2.04                | 0.00 %                      | 42.76 %                     | 0.00 %                       | 57.24 %                     |            |

## Carbonate and acidity

 Carbonate 0.000 mM  
 Acidity error 0.678 mM

## Other graphs

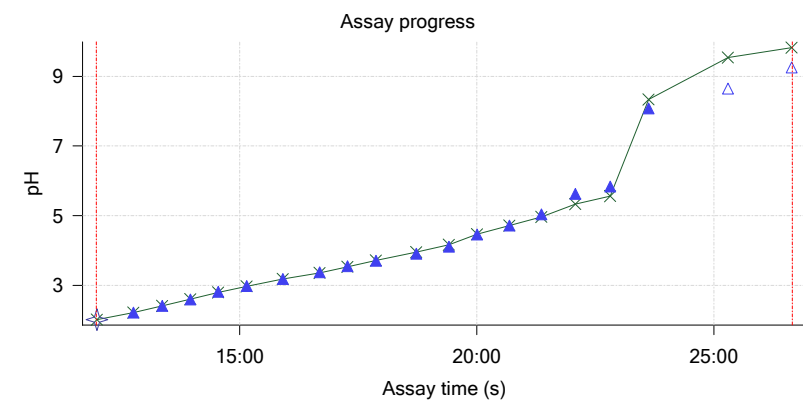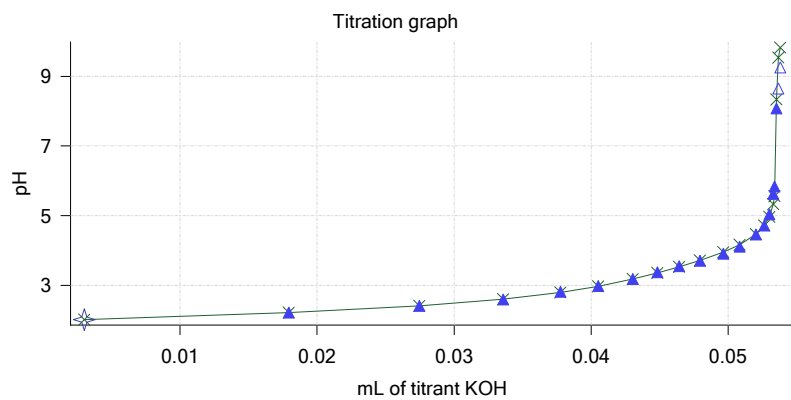

Sample name: **M11\_octanol**  
 Assay name: **pH-metric high logP**  
 Assay ID: **18B-27016**  
 Filename: **C:\Sirius\_T3\Mehtap\20180227\_exp27\_logP\_T3-2\18B-27016\_M11\_octanol\_pH-metric high logP.t3r**

Experiment start time: **2/27/2018 10:54:30 PM**  
 Analyst: **Pion**  
 Instrument ID: **T312060**

## Other graphs (continued)

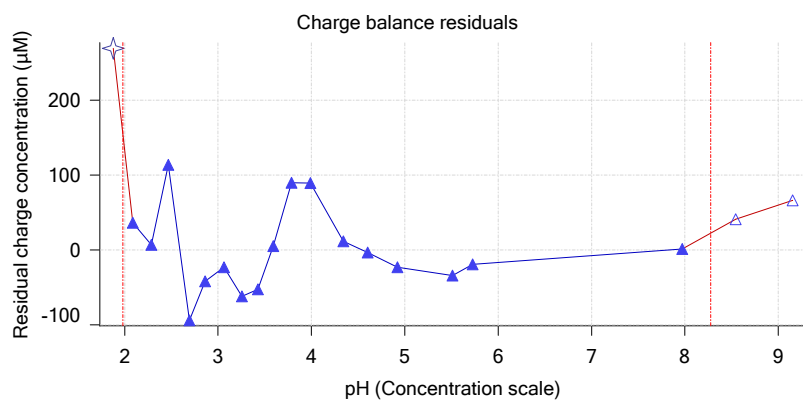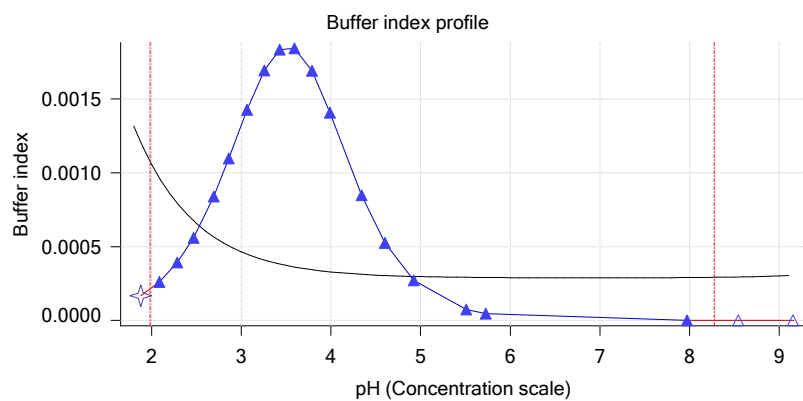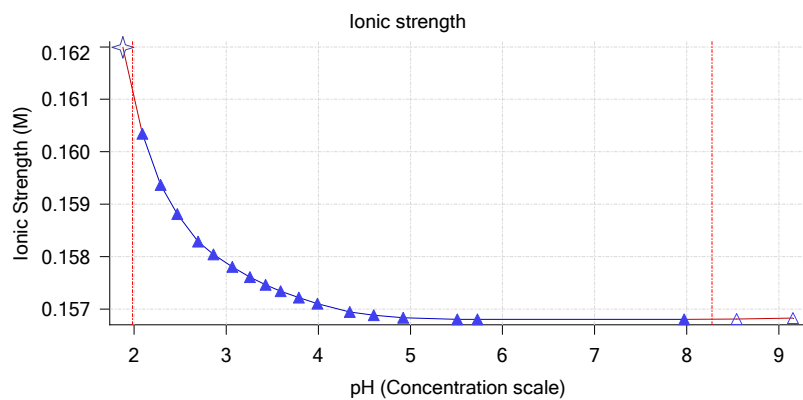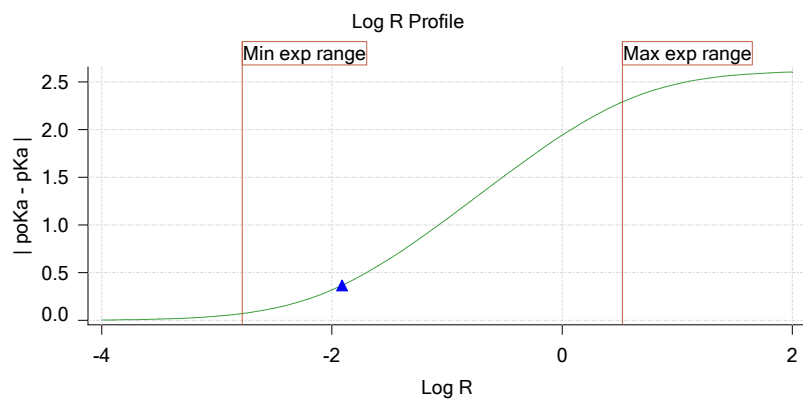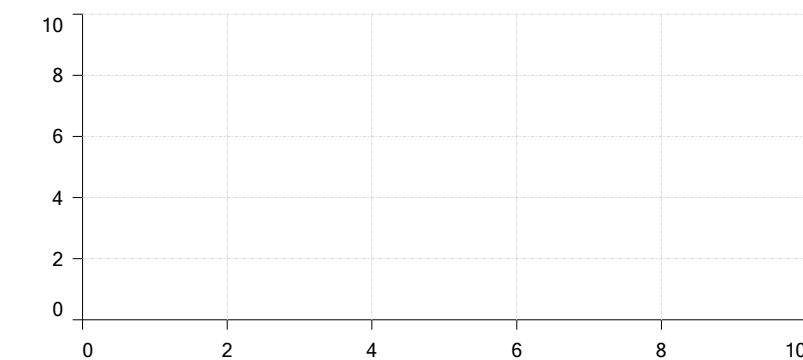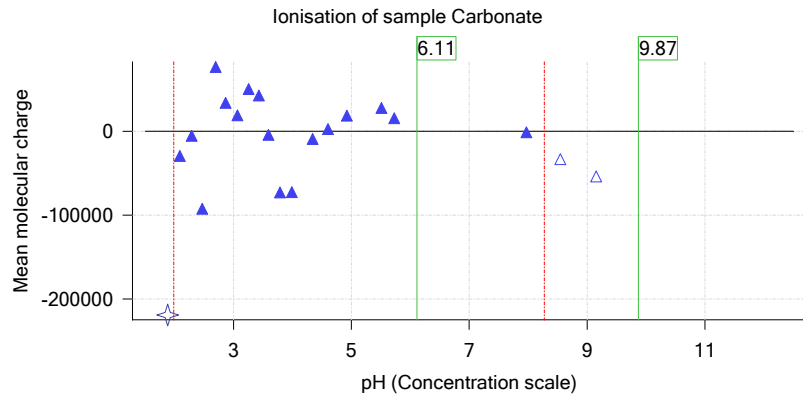

Sample name: **M11\_octanol**  
 Assay name: **pH-metric high logP**  
 Assay ID: **18B-27016**  
 Filename: **C:\Sirius\_T3\Mehtap\20180227\_exp27\_logP\_T3-2\18B-27016\_M11\_octanol\_pH-metric high logP.t3r**

Experiment start time: **2/27/2018 10:54:30 PM**  
 Analyst: **Pion**  
 Instrument ID: **T312060**

pH-metric high logP Titration 2 of 3 18B-27016 Points 21 to 40

## Overall results

RMSD 0.275  
 Average ionic strength 0.163 M  
 Average temperature 25.0°C  
 Partition ratio 0.0582 : 1  
 Analyte concentration range 2864.7 µM to 2955.2 µM  
 Total points considered 15 of 20

## Warnings and errors

Errors None  
 Warnings None

## Four-Plus parameters

Alpha 0.130 2/27/2018 10:54:30 PM C:\Sirius\_T3\HCl18B27.t3r  
 S 0.9970 2/27/2018 10:54:30 PM C:\Sirius\_T3\HCl18B27.t3r  
 jH 0.8 2/27/2018 10:54:30 PM C:\Sirius\_T3\HCl18B27.t3r  
 jOH -0.4 2/27/2018 10:54:30 PM C:\Sirius\_T3\HCl18B27.t3r

## Titrants

0.50 M HCl 0.993513 2/27/2018 10:54:30 PM C:\Sirius\_T3\HCl18B27.t3r  
 0.50 M KOH 0.999845 2/27/2018 10:54:30 PM C:\Sirius\_T3\KOH18B27.t3r

## Sample

M11\_octanol concentration factor 0.815  
 Base pKa 1 3.89  
 logP (XH +) -0.58  
 logP (neutral X) 2.15

## Sample graphs

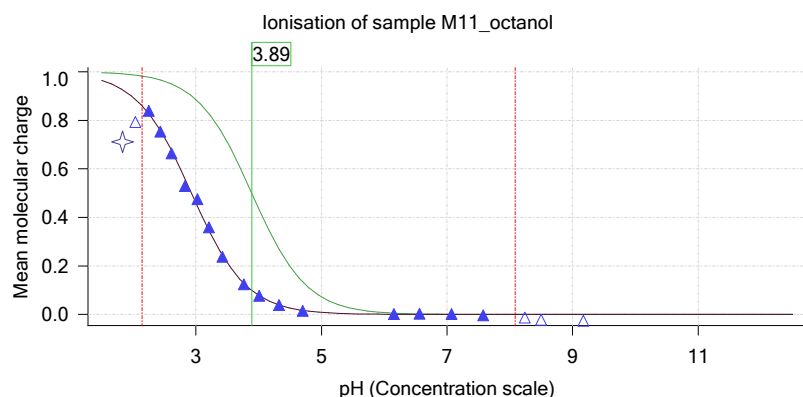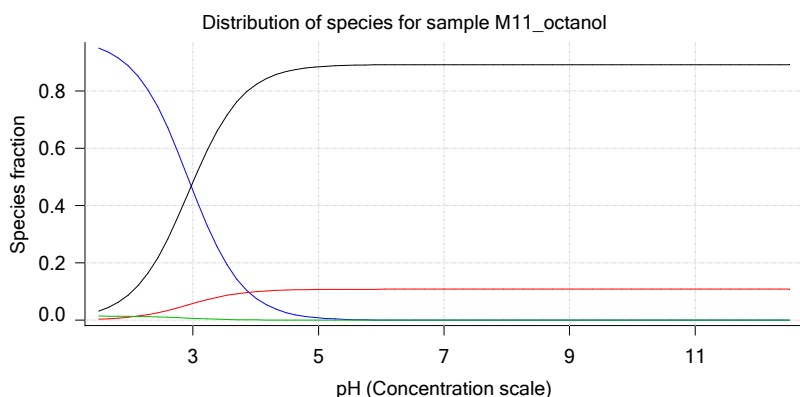

Sample name: **M11\_octanol**  
Assay name: **pH-metric high logP**  
Assay ID: **18B-27016**  
Filename: **C:\Sirius\_T3\Mehtap\20180227\_exp27\_logP\_T3-2\18B-27016\_M11\_octanol\_pH-metric high logP.t3r**

Experiment start time: **2/27/2018 10:54:30 PM**  
Analyst: **Pion**  
Instrument ID: **T312060**

## Sample graphs (continued)

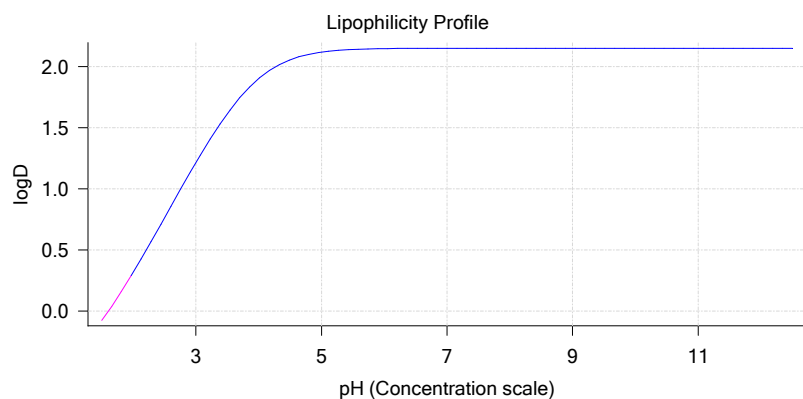

## Sample logD and percent species

| pH     | M11_octanol<br>logD | M11_octanol<br>M11_octanolH | M11_octanol<br>M11_octanol | M11_octanol<br>M11_octanolH* | M11_octanol<br>M11_octanol* | Comment    |
|--------|---------------------|-----------------------------|----------------------------|------------------------------|-----------------------------|------------|
| 1.000  | -0.35               | 97.35 %                     | 0.13 %                     | 1.49 %                       | 1.03 %                      | Stomach pH |
| 1.200  | -0.26               | 96.70 %                     | 0.20 %                     | 1.48 %                       | 1.63 %                      |            |
| 2.000  | 0.31                | 88.17 %                     | 1.14 %                     | 1.35 %                       | 9.35 %                      |            |
| 3.000  | 1.21                | 45.36 %                     | 5.84 %                     | 0.69 %                       | 48.10 %                     |            |
| 4.000  | 1.90                | 7.75 %                      | 9.98 %                     | 0.12 %                       | 82.15 %                     |            |
| 5.000  | 2.12                | 0.83 %                      | 10.74 %                    | 0.01 %                       | 88.41 %                     | Blood pH   |
| 6.000  | 2.15                | 0.08 %                      | 10.82 %                    | 0.00 %                       | 89.09 %                     |            |
| 6.500  | 2.15                | 0.03 %                      | 10.83 %                    | 0.00 %                       | 89.14 %                     |            |
| 7.000  | 2.15                | 0.01 %                      | 10.83 %                    | 0.00 %                       | 89.16 %                     |            |
| 7.400  | 2.15                | 0.00 %                      | 10.83 %                    | 0.00 %                       | 89.16 %                     |            |
| 8.000  | 2.15                | 0.00 %                      | 10.83 %                    | 0.00 %                       | 89.17 %                     |            |
| 9.000  | 2.15                | 0.00 %                      | 10.83 %                    | 0.00 %                       | 89.17 %                     |            |
| 10.000 | 2.15                | 0.00 %                      | 10.83 %                    | 0.00 %                       | 89.17 %                     |            |
| 11.000 | 2.15                | 0.00 %                      | 10.83 %                    | 0.00 %                       | 89.17 %                     |            |
| 12.000 | 2.15                | 0.00 %                      | 10.83 %                    | 0.00 %                       | 89.17 %                     |            |

## Carbonate and acidity

Carbonate 0.082 mM  
Acidity error 0.329 mM

## Other graphs

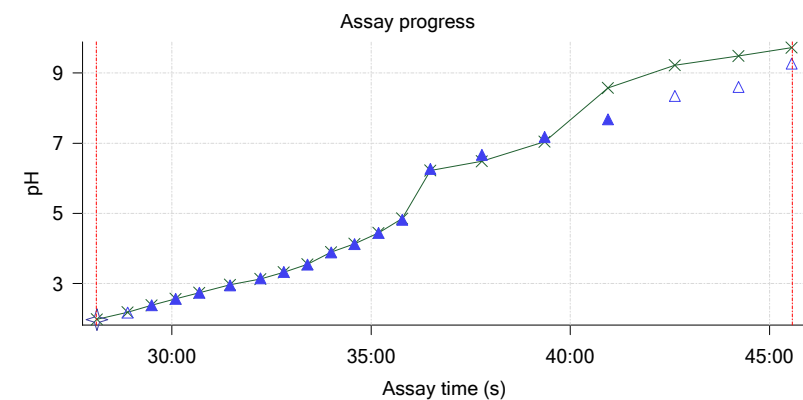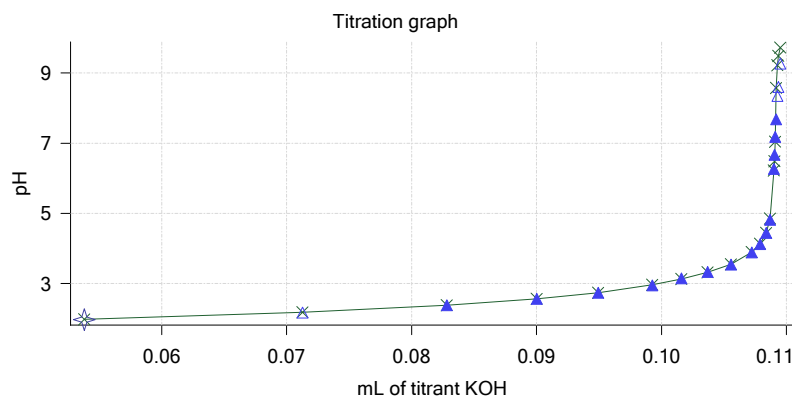



Sample name: **M11\_octanol**  
 Assay name: **pH-metric high logP**  
 Assay ID: **18B-27016**  
 Filename: **C:\Sirius\_T3\Mehtap\20180227\_exp27\_logP\_T3-2\18B-27016\_M11\_octanol\_pH-metric high logP.t3r**

Experiment start time: **2/27/2018 10:54:30 PM**  
 Analyst: **Pion**  
 Instrument ID: **T312060**

## Other graphs (continued)

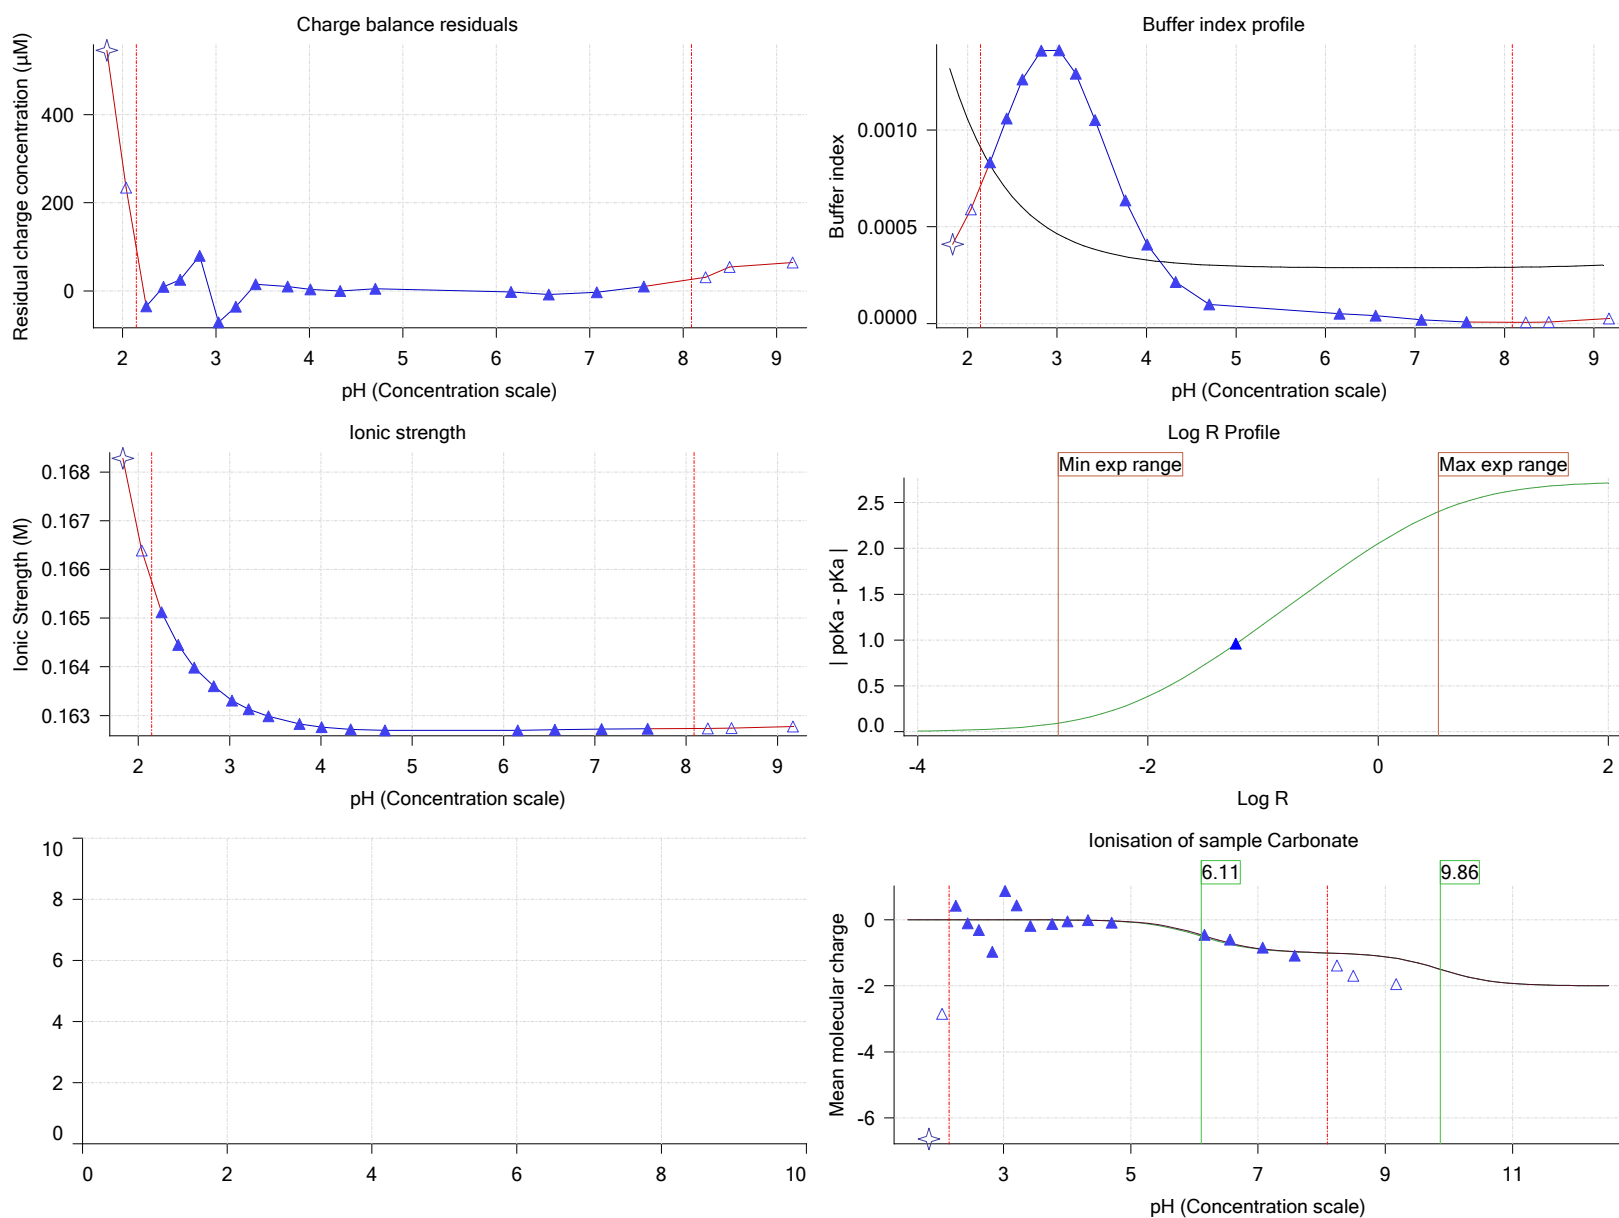

Sample name: **M11\_octanol**  
 Assay name: **pH-metric high logP**  
 Assay ID: **18B-27016**  
 Filename: **C:\Sirius\_T3\Mehtap\20180227\_exp27\_logP\_T3-2\18B-27016\_M11\_octanol\_pH-metric high logP.t3r**

Experiment start time: **2/27/2018 10:54:30 PM**  
 Analyst: **Pion**  
 Instrument ID: **T312060**

pH-metric high logP Titration 3 of 3 18B-27016 Points 41 to 62

## Overall results

RMSD 0.122  
 Average ionic strength 0.169 M  
 Average temperature 25.0°C  
 Partition ratio 0.1640 : 1  
 Analyte concentration range 2436.6 µM to 2507.4 µM  
 Total points considered 16 of 22

## Warnings and errors

Errors None  
 Warnings None

## Four-Plus parameters

Alpha 0.130 2/27/2018 10:54:30 PM C:\Sirius\_T3\HCl18B27.t3r  
 S 0.9970 2/27/2018 10:54:30 PM C:\Sirius\_T3\HCl18B27.t3r  
 jH 0.8 2/27/2018 10:54:30 PM C:\Sirius\_T3\HCl18B27.t3r  
 jOH -0.4 2/27/2018 10:54:30 PM C:\Sirius\_T3\HCl18B27.t3r

## Titrants

0.50 M HCl 0.993513 2/27/2018 10:54:30 PM C:\Sirius\_T3\HCl18B27.t3r  
 0.50 M KOH 0.999845 2/27/2018 10:54:30 PM C:\Sirius\_T3\KOH18B27.t3r

## Sample

M11\_octanol concentration factor 0.703  
 Base pKa 1 3.89  
 logP (XH +) -0.58  
 logP (neutral X) 2.09

## Sample graphs

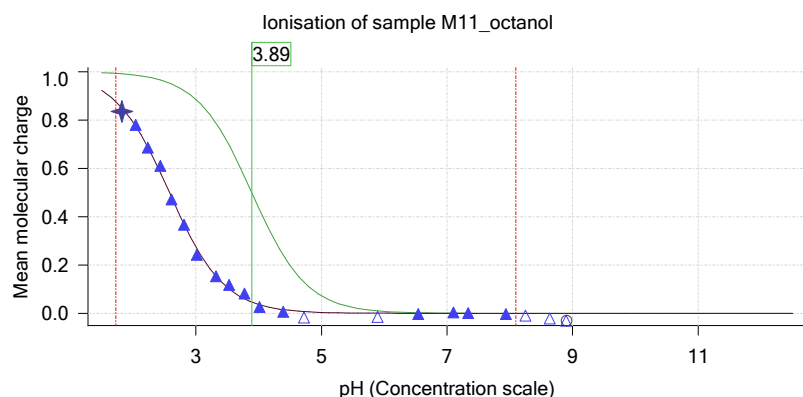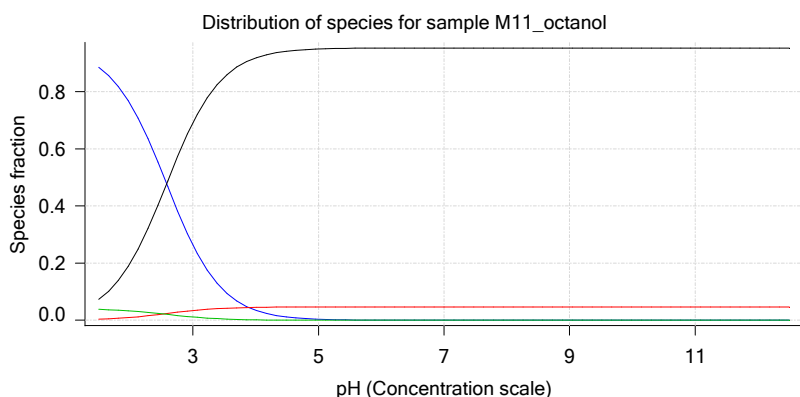

Sample name: **M11\_octanol**  
Assay name: **pH-metric high logP**  
Assay ID: **18B-27016**  
Filename: **C:\Sirius\_T3\Mehtap\20180227\_exp27\_logP\_T3-2\18B-27016\_M11\_octanol\_pH-metric high logP.t3r**

Experiment start time: **2/27/2018 10:54:30 PM**  
Analyst: **Pion**  
Instrument ID: **T312060**

## Sample graphs (continued)

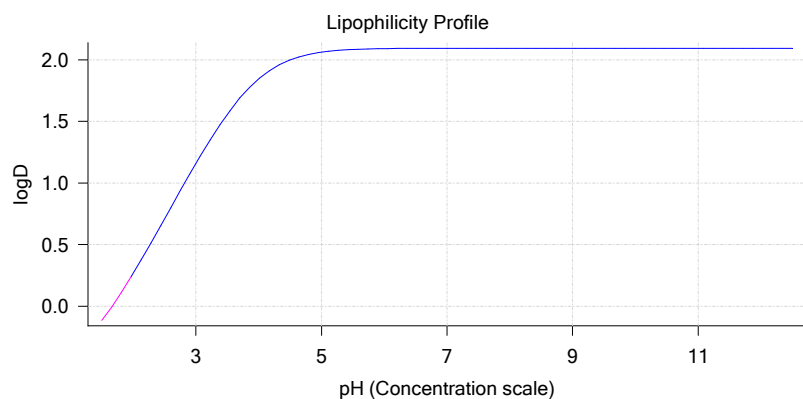

## Sample logD and percent species

| pH     | M11_octanol<br>logD | M11_octanol<br>M11_octanolH | M11_octanol<br>M11_octanolH | M11_octanol<br>M11_octanolH* | M11_octanol<br>M11_octanol* | Comment    |
|--------|---------------------|-----------------------------|-----------------------------|------------------------------|-----------------------------|------------|
| 1.000  | -0.37               | 93.40 %                     | 0.12 %                      | 4.03 %                       | 2.45 %                      | Stomach pH |
| 1.200  | -0.29               | 92.02 %                     | 0.19 %                      | 3.97 %                       | 3.82 %                      |            |
| 2.000  | 0.26                | 75.86 %                     | 0.98 %                      | 3.27 %                       | 19.89 %                     |            |
| 3.000  | 1.16                | 26.36 %                     | 3.40 %                      | 1.14 %                       | 69.10 %                     |            |
| 4.000  | 1.84                | 3.50 %                      | 4.51 %                      | 0.15 %                       | 91.83 %                     |            |
| 5.000  | 2.06                | 0.36 %                      | 4.67 %                      | 0.02 %                       | 94.96 %                     | Blood pH   |
| 6.000  | 2.09                | 0.04 %                      | 4.68 %                      | 0.00 %                       | 95.28 %                     |            |
| 6.500  | 2.09                | 0.01 %                      | 4.68 %                      | 0.00 %                       | 95.30 %                     |            |
| 7.000  | 2.09                | 0.00 %                      | 4.68 %                      | 0.00 %                       | 95.31 %                     |            |
| 7.400  | 2.09                | 0.00 %                      | 4.68 %                      | 0.00 %                       | 95.31 %                     |            |
| 8.000  | 2.09                | 0.00 %                      | 4.68 %                      | 0.00 %                       | 95.32 %                     |            |
| 9.000  | 2.09                | 0.00 %                      | 4.68 %                      | 0.00 %                       | 95.32 %                     |            |
| 10.000 | 2.09                | 0.00 %                      | 4.68 %                      | 0.00 %                       | 95.32 %                     |            |
| 11.000 | 2.09                | 0.00 %                      | 4.68 %                      | 0.00 %                       | 95.32 %                     |            |
| 12.000 | 2.09                | 0.00 %                      | 4.68 %                      | 0.00 %                       | 95.32 %                     |            |

## Carbonate and acidity

Carbonate 0.142 mM  
Acidity error 0.692 mM

## Other graphs

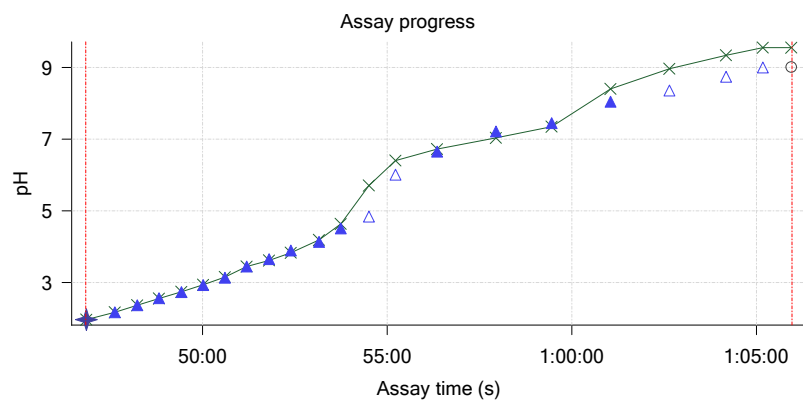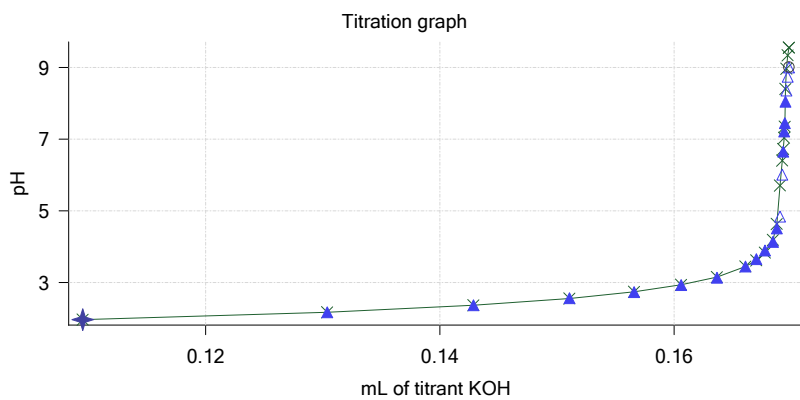

Sample name: **M11\_octanol**  
 Assay name: **pH-metric high logP**  
 Assay ID: **18B-27016**  
 Filename: **C:\Sirius\_T3\Mehtap\20180227\_exp27\_logP\_T3-2\18B-27016\_M11\_octanol\_pH-metric high logP.t3r**

Experiment start time: **2/27/2018 10:54:30 PM**  
 Analyst: **Pion**  
 Instrument ID: **T312060**

## Other graphs (continued)

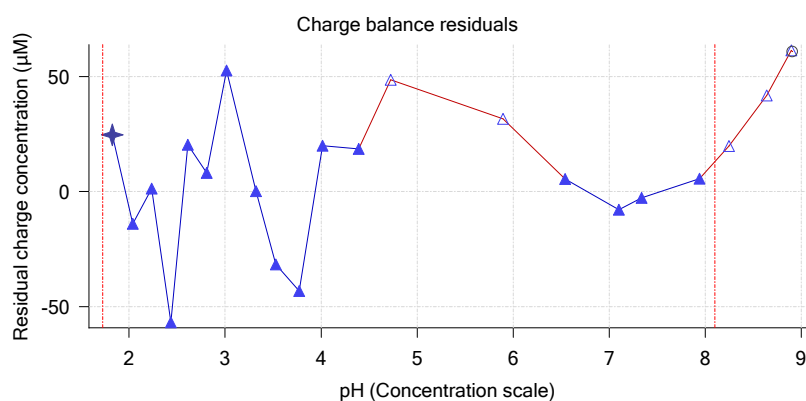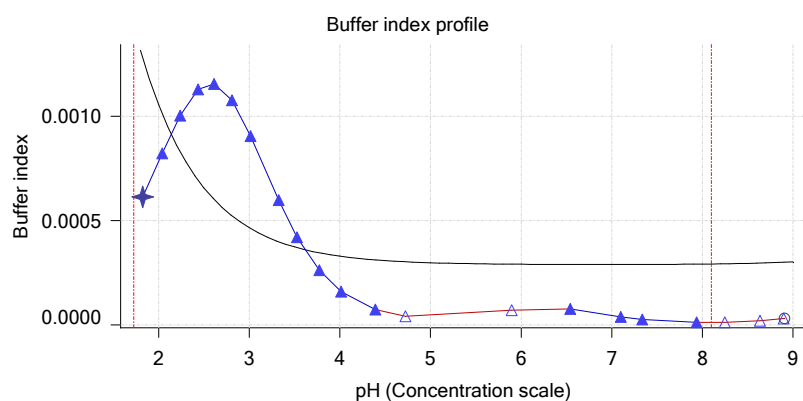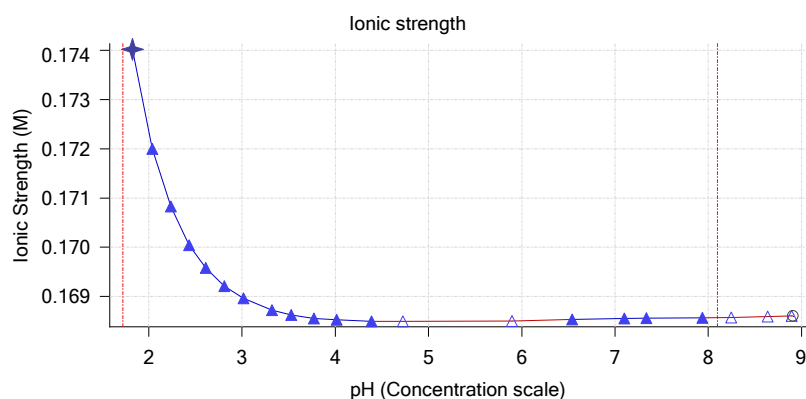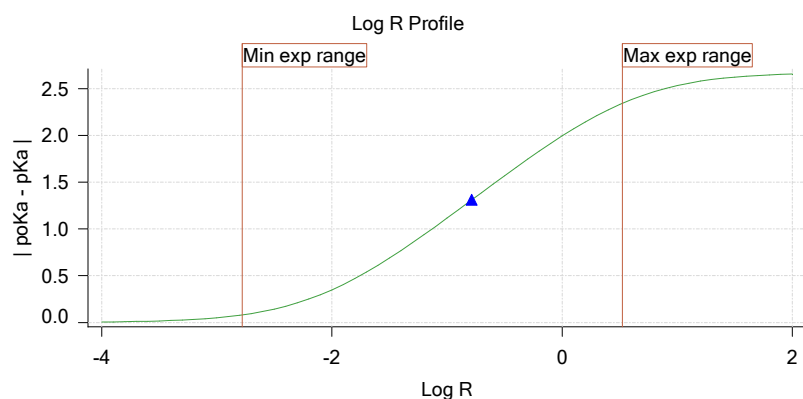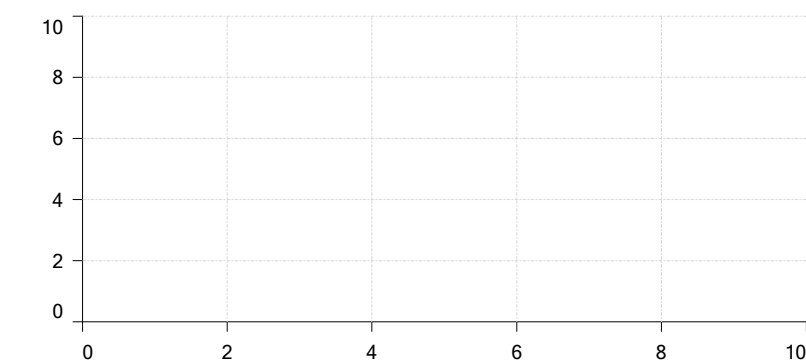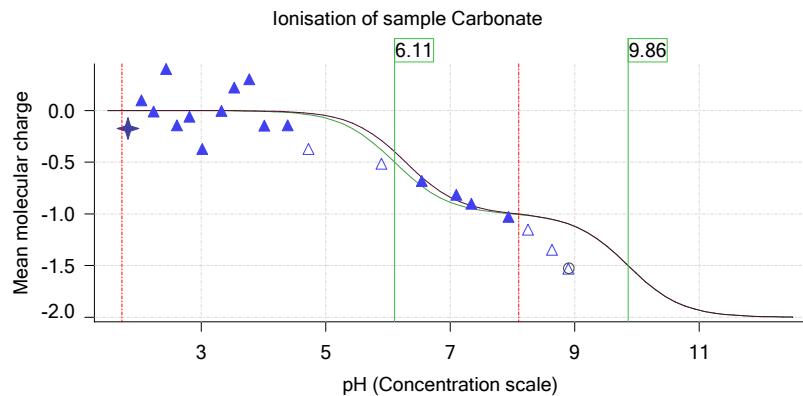

Sample name: **M11\_octanol**  
 Assay name: **pH-metric high logP**  
 Assay ID: **18B-27016**  
 Filename: **C:\Sirius\_T3\Mehtap\20180227\_exp27\_logP\_T3-2\18B-27016\_M11\_octanol\_pH-metric high logP.t3r**

Experiment start time: **2/27/2018 10:54:30 PM**  
 Analyst: **Pion**  
 Instrument ID: **T312060**

## Assay Model

| Settings                          | Value        | Date/Time changed    | Imported from      |
|-----------------------------------|--------------|----------------------|--------------------|
| Sample name                       | M11_octanol  | 2/27/2018 4:54:30 PM | User entered value |
| Sample by                         | Weight       |                      | Default value      |
| Sample weight                     | 0.001100 g   | 2/27/2018 6:40:56 PM | User entered value |
| Formula weight                    | 211.22 g/mol | 2/27/2018 4:54:30 PM | User entered value |
| Solubility                        | Unknown      |                      | Default value      |
| Molecular weight                  | 211.22       | 2/27/2018 4:54:30 PM | User entered value |
| Individual pKa ionic environments | No           |                      | Default value      |
| Number of pKas                    | 1            | 2/27/2018 4:54:30 PM | User entered value |
| Sample is a                       | Base         | 2/27/2018 4:54:30 PM | User entered value |
| pKa 1                             | 3.89         | 2/27/2018 4:54:30 PM | User entered value |
| logp (XH +)                       | -0.58        | 2/27/2018 4:54:54 PM | User entered value |
| logP (neutral X)                  | 1.24         | 2/27/2018 4:54:49 PM | User entered value |

## Events

| Time    | Event             | Water      | Acid       | Base       | Octanol    | pH    | dpH/dt   | pH R-squared | pH SD   | dpH/dt time         |
|---------|-------------------|------------|------------|------------|------------|-------|----------|--------------|---------|---------------------|
| 8:60.0  | Initial pH = 6.35 |            |            |            |            |       |          |              |         |                     |
| 11:59.5 | Data point 1      | 1.50000 mL | 0.05167 mL | 0.00301 mL | 0.01999 mL | 2.012 | -0.01321 | 0.59861      | 0.00084 | 10.0 s              |
| 12:45.7 | Data point 2      | 1.50000 mL | 0.05167 mL | 0.01794 mL | 0.01999 mL | 2.217 | -0.01201 | 0.89280      | 0.00063 | 10.5 s              |
| 13:21.8 | Data point 3      | 1.50000 mL | 0.05167 mL | 0.02747 mL | 0.01999 mL | 2.415 | -0.00642 | 0.73636      | 0.00037 | 10.0 s              |
| 13:57.4 | Data point 4      | 1.50000 mL | 0.05167 mL | 0.03358 mL | 0.01999 mL | 2.593 | -0.00697 | 0.59547      | 0.00045 | 10.0 s              |
| 14:32.9 | Data point 5      | 1.50000 mL | 0.05167 mL | 0.03777 mL | 0.01999 mL | 2.816 | -0.00524 | 0.75021      | 0.00030 | 10.5 s              |
| 15:08.9 | Data point 6      | 1.50000 mL | 0.05167 mL | 0.04052 mL | 0.01999 mL | 2.984 | -0.01107 | 0.79804      | 0.00061 | 10.0 s              |
| 15:54.8 | Data point 7      | 1.50000 mL | 0.05167 mL | 0.04304 mL | 0.01999 mL | 3.186 | -0.00468 | 0.88101      | 0.00025 | 10.5 s              |
| 16:41.1 | Data point 8      | 1.50000 mL | 0.05167 mL | 0.04485 mL | 0.01999 mL | 3.377 | -0.00932 | 0.44692      | 0.00069 | 10.0 s              |
| 17:16.6 | Data point 9      | 1.50000 mL | 0.05167 mL | 0.04643 mL | 0.01999 mL | 3.547 | -0.00399 | 0.79959      | 0.00022 | 10.5 s              |
| 17:52.6 | Data point 10     | 1.50000 mL | 0.05167 mL | 0.04795 mL | 0.01999 mL | 3.710 | -0.00939 | 0.88441      | 0.00049 | 10.0 s              |
| 18:43.6 | Data point 11     | 1.50000 mL | 0.05167 mL | 0.04965 mL | 0.01999 mL | 3.906 | 0.00461  | 0.20532      | 0.00050 | 10.5 s              |
| 19:24.7 | Data point 12     | 1.50000 mL | 0.05167 mL | 0.05085 mL | 0.01999 mL | 4.108 | -0.01572 | 0.89585      | 0.00082 | 10.0 s              |
| 20:00.3 | Data point 13     | 1.50000 mL | 0.05167 mL | 0.05205 mL | 0.01999 mL | 4.458 | -0.01283 | 0.78922      | 0.00071 | 10.5 s              |
| 20:41.3 | Data point 14     | 1.50000 mL | 0.05167 mL | 0.05263 mL | 0.01999 mL | 4.719 | -0.01182 | 0.87243      | 0.00063 | 10.0 s              |
| 21:21.9 | Data point 15     | 1.50000 mL | 0.05167 mL | 0.05301 mL | 0.01999 mL | 5.038 | -0.01739 | 0.94532      | 0.00088 | 12.5 s              |
| 22:05.0 | Data point 16     | 1.50000 mL | 0.05167 mL | 0.05329 mL | 0.01999 mL | 5.624 | -0.01784 | 0.80310      | 0.00098 | 18.5 s              |
| 22:48.9 | Data point 17     | 1.50000 mL | 0.05167 mL | 0.05339 mL | 0.01999 mL | 5.840 | -0.01669 | 0.76560      | 0.00094 | 18.0 s              |
| 23:37.4 | Data point 18     | 1.50000 mL | 0.05167 mL | 0.05353 mL | 0.01999 mL | 8.078 | -0.05197 | 0.99587      | 0.00257 | Timed out at 59.5 s |
| 25:18.2 | Data point 19     | 1.50000 mL | 0.05167 mL | 0.05367 mL | 0.01999 mL | 8.647 | -0.01738 | 0.86596      | 0.00092 | 44.5 s              |
| 26:38.3 | Data point 20     | 1.50000 mL | 0.05167 mL | 0.05381 mL | 0.01999 mL | 9.256 | -0.01881 | 0.92735      | 0.00096 | 29.0 s              |
| 28:07.4 | Data point 21     | 1.50000 mL | 0.10842 mL | 0.05381 mL | 0.10000 mL | 1.967 | -0.00520 | 0.28864      | 0.00048 | 10.0 s              |
| 28:53.7 | Data point 22     | 1.50000 mL | 0.10842 mL | 0.07126 mL | 0.10000 mL | 2.168 | -0.01928 | 0.91140      | 0.00100 | 10.5 s              |
| 29:29.9 | Data point 23     | 1.50000 mL | 0.10842 mL | 0.08283 mL | 0.10000 mL | 2.381 | 0.00042  | 0.05097      | 0.00009 | 10.5 s              |
| 30:06.0 | Data point 24     | 1.50000 mL | 0.10842 mL | 0.09000 mL | 0.10000 mL | 2.562 | -0.00366 | 0.61217      | 0.00023 | 10.0 s              |
| 30:41.6 | Data point 25     | 1.50000 mL | 0.10842 mL | 0.09492 mL | 0.10000 mL | 2.738 | -0.01006 | 0.31818      | 0.00088 | 10.0 s              |
| 31:27.5 | Data point 26     | 1.50000 mL | 0.10842 mL | 0.09925 mL | 0.10000 mL | 2.947 | -0.00503 | 0.77202      | 0.00028 | 10.0 s              |
| 32:13.3 | Data point 27     | 1.50000 mL | 0.10842 mL | 0.10160 mL | 0.10000 mL | 3.147 | -0.00762 | 0.61374      | 0.00048 | 10.0 s              |
| 32:48.8 | Data point 28     | 1.50000 mL | 0.10842 mL | 0.10369 mL | 0.10000 mL | 3.331 | -0.01378 | 0.87687      | 0.00073 | 10.0 s              |
| 33:24.3 | Data point 29     | 1.50000 mL | 0.10842 mL | 0.10555 mL | 0.10000 mL | 3.544 | -0.00880 | 0.29642      | 0.00080 | 10.0 s              |
| 33:59.7 | Data point 30     | 1.50000 mL | 0.10842 mL | 0.10722 mL | 0.10000 mL | 3.884 | -0.00929 | 0.26981      | 0.00088 | 10.0 s              |
| 34:35.2 | Data point 31     | 1.50000 mL | 0.10842 mL | 0.10788 mL | 0.10000 mL | 4.125 | -0.00452 | 0.80460      | 0.00025 | 10.5 s              |
| 35:11.1 | Data point 32     | 1.50000 mL | 0.10842 mL | 0.10837 mL | 0.10000 mL | 4.444 | -0.01177 | 0.87839      | 0.00062 | 10.5 s              |
| 35:46.9 | Data point 33     | 1.50000 mL | 0.10842 mL | 0.10868 mL | 0.10000 mL | 4.818 | -0.01577 | 0.78042      | 0.00088 | 12.0 s              |
| 36:29.4 | Data point 34     | 1.50000 mL | 0.10842 mL | 0.10898 mL | 0.10000 mL | 6.267 | -0.01927 | 0.97409      | 0.00096 | 52.0 s              |
| 37:46.9 | Data point 35     | 1.50000 mL | 0.10842 mL | 0.10903 mL | 0.10000 mL | 6.671 | -0.01898 | 0.96189      | 0.00096 | 58.5 s              |
| 39:21.1 | Data point 36     | 1.50000 mL | 0.10842 mL | 0.10910 mL | 0.10000 mL | 7.182 | -0.05514 | 0.98470      | 0.00274 | Timed out at 59.5 s |
| 40:56.7 | Data point 37     | 1.50000 mL | 0.10842 mL | 0.10917 mL | 0.10000 mL | 7.684 | -0.05926 | 0.99557      | 0.00293 | Timed out at 59.5 s |

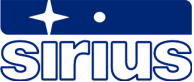

## Assay Events

Sample name: **M11\_octanol**  
Assay name: **pH-metric high logP**  
Assay ID: **18B-27016**  
Filename: **C:\Sirius\_T3\Mehtap\20180227\_exp27\_logP\_T3-2\18B-27016\_M11\_octanol\_pH-metric high logP.t3r**

Experiment start time: **2/27/2018 10:54:30 PM**  
Analyst: **Pion**  
Instrument ID: **T312060**

## Events (continued)

| Time      | Event         | Water      | Acid       | Base       | Octanol    | pH    | dpH/dt   | pH R-squared | pH SD   | dpH/dt time         |
|-----------|---------------|------------|------------|------------|------------|-------|----------|--------------|---------|---------------------|
| 42:37.4   | Data point 38 | 1.50000 mL | 0.10842 mL | 0.10927 mL | 0.10000 mL | 8.344 | -0.02444 | 0.97413      | 0.00122 | Timed out at 59.5 s |
| 44:13.0   | Data point 39 | 1.50000 mL | 0.10842 mL | 0.10936 mL | 0.10000 mL | 8.601 | -0.01930 | 0.94203      | 0.00098 | 44.5 s              |
| 45:33.1   | Data point 40 | 1.50000 mL | 0.10842 mL | 0.10950 mL | 0.10000 mL | 9.271 | -0.01442 | 0.69862      | 0.00085 | 15.0 s              |
| 46:50.9   | Data point 41 | 1.50000 mL | 0.16747 mL | 0.10950 mL | 0.30000 mL | 1.960 | -0.00611 | 0.71181      | 0.00036 | 10.0 s              |
| 47:37.4   | Data point 42 | 1.50000 mL | 0.16747 mL | 0.13039 mL | 0.30000 mL | 2.171 | -0.01056 | 0.60425      | 0.00067 | 10.5 s              |
| 48:13.6   | Data point 43 | 1.50000 mL | 0.16747 mL | 0.14287 mL | 0.30000 mL | 2.364 | -0.00724 | 0.54028      | 0.00049 | 10.0 s              |
| 48:49.2   | Data point 44 | 1.50000 mL | 0.16747 mL | 0.15106 mL | 0.30000 mL | 2.559 | -0.00372 | 0.68600      | 0.00022 | 10.5 s              |
| 49:25.4   | Data point 45 | 1.50000 mL | 0.16747 mL | 0.15656 mL | 0.30000 mL | 2.736 | -0.00396 | 0.44516      | 0.00029 | 10.0 s              |
| 50:00.9   | Data point 46 | 1.50000 mL | 0.16747 mL | 0.16058 mL | 0.30000 mL | 2.932 | -0.00663 | 0.33641      | 0.00056 | 10.0 s              |
| 50:36.4   | Data point 47 | 1.50000 mL | 0.16747 mL | 0.16364 mL | 0.30000 mL | 3.137 | -0.01016 | 0.30029      | 0.00092 | 10.0 s              |
| 51:11.9   | Data point 48 | 1.50000 mL | 0.16747 mL | 0.16609 mL | 0.30000 mL | 3.444 | -0.00956 | 0.44143      | 0.00071 | 10.5 s              |
| 51:47.9   | Data point 49 | 1.50000 mL | 0.16747 mL | 0.16700 mL | 0.30000 mL | 3.647 | -0.00982 | 0.27260      | 0.00093 | 10.0 s              |
| 52:23.4   | Data point 50 | 1.50000 mL | 0.16747 mL | 0.16773 mL | 0.30000 mL | 3.891 | -0.00230 | 0.16102      | 0.00028 | 10.0 s              |
| 53:09.1   | Data point 51 | 1.50000 mL | 0.16747 mL | 0.16842 mL | 0.30000 mL | 4.133 | -0.00752 | 0.36746      | 0.00061 | 10.0 s              |
| 53:44.5   | Data point 52 | 1.50000 mL | 0.16747 mL | 0.16877 mL | 0.30000 mL | 4.507 | -0.01597 | 0.71656      | 0.00093 | 10.0 s              |
| 54:30.2   | Data point 53 | 1.50000 mL | 0.16747 mL | 0.16903 mL | 0.30000 mL | 4.840 | -0.00857 | 0.27004      | 0.00082 | 12.5 s              |
| 55:13.3   | Data point 54 | 1.50000 mL | 0.16747 mL | 0.16921 mL | 0.30000 mL | 6.006 | -0.01875 | 0.96219      | 0.00094 | 37.5 s              |
| 56:21.2   | Data point 55 | 1.50000 mL | 0.16747 mL | 0.16931 mL | 0.30000 mL | 6.652 | -0.05803 | 0.99479      | 0.00287 | Timed out at 59.5 s |
| 57:56.8   | Data point 56 | 1.50000 mL | 0.16747 mL | 0.16938 mL | 0.30000 mL | 7.209 | -0.06064 | 0.98448      | 0.00302 | Timed out at 59.5 s |
| 59:27.4   | Data point 57 | 1.50000 mL | 0.16747 mL | 0.16943 mL | 0.30000 mL | 7.445 | -0.06310 | 0.99629      | 0.00312 | Timed out at 59.5 s |
| 1:01:03.0 | Data point 58 | 1.50000 mL | 0.16747 mL | 0.16950 mL | 0.30000 mL | 8.044 | -0.04412 | 0.95409      | 0.00223 | Timed out at 59.5 s |
| 1:02:38.8 | Data point 59 | 1.50000 mL | 0.16747 mL | 0.16957 mL | 0.30000 mL | 8.352 | -0.01985 | 0.97791      | 0.00099 | 51.0 s              |
| 1:04:10.8 | Data point 60 | 1.50000 mL | 0.16747 mL | 0.16969 mL | 0.30000 mL | 8.741 | -0.01671 | 0.79899      | 0.00092 | 24.0 s              |
| 1:05:10.6 | Data point 61 | 1.50000 mL | 0.16747 mL | 0.16980 mL | 0.30000 mL | 8.999 | -0.01827 | 0.88409      | 0.00096 | 26.0 s              |
| 1:05:56.8 | Data point 62 | 1.50000 mL | 0.16747 mL | 0.16980 mL | 0.30000 mL | 9.010 | -0.01788 | 0.90579      | 0.00093 | 19.0 s              |
| 1:06:25.0 | Assay volumes | 1.50000 mL | 0.16747 mL | 0.16980 mL | 0.30000 mL |       |          |              |         |                     |

Sample name: **M11\_octanol**  
 Assay name: **pH-metric high logP**  
 Assay ID: **18B-27016**  
 Filename: **C:\Sirius\_T3\Mehtap\20180227\_exp27\_logP\_T3-2\18B-27016\_M11\_octanol\_pH-metric high logP.t3r**

Experiment start time: **2/27/2018 10:54:30 PM**  
 Analyst: **Pion**  
 Instrument ID: **T312060**

## Assay Settings

| Setting                             | Value              | Original Value | Date/Time changed | Imported from |
|-------------------------------------|--------------------|----------------|-------------------|---------------|
| <b>General Settings</b>             |                    |                |                   |               |
| Analyst name                        | Pion               |                |                   |               |
| <b>Standard Experiment Settings</b> |                    |                |                   |               |
| Number of titrations                | 3                  |                |                   |               |
| Minimum pH                          | 2.000              |                |                   |               |
| Maximum pH                          | 9.000              |                |                   |               |
| pH step between points of           | 0.200              |                |                   |               |
| Minimum titrant addition            | 0.00002 mL         |                |                   |               |
| Maximum titrant addition            | 0.10000 mL         |                |                   |               |
| Argon flow rate                     | 100%               |                |                   |               |
| Start titration using               | Cautious pH adjust |                |                   |               |
| <b>Advanced General Settings</b>    |                    |                |                   |               |
| Detect turbidity using              | None               |                |                   |               |
| Collect turbidity sensor data       | No                 |                |                   |               |
| Collect UV spectra                  | No                 |                |                   |               |
| Stir after titrant addition for     | 5 seconds          |                |                   |               |
| For titrant addition, stir at       | 10%                |                |                   |               |
| <b>Titration Pre-Dose</b>           |                    |                |                   |               |
| Titration pre-dose                  | None               |                |                   |               |
| <b>Assay Medium</b>                 |                    |                |                   |               |
| ISA water volume                    | 1.50 mL            |                |                   |               |
| Water added                         | Automatic          |                |                   |               |
| Partition solvent type              | Octanol            |                |                   |               |
| Partition volume                    | 0.020 mL           |                |                   |               |
| Partition solvent added             | Automatic          |                |                   |               |
| After partition addition, stir for  | 1 seconds          |                |                   |               |
| <b>Sample Sonication</b>            |                    |                |                   |               |
| Sonicate                            | Yes                |                |                   |               |
| Adjust pH for sonication            | No                 |                |                   |               |
| Sonicate for                        | 300 seconds        |                |                   |               |
| After sonication stir for           | 5 seconds          |                |                   |               |
| <b>Sample Dissolution</b>           |                    |                |                   |               |
| Perform a dissolution stage         | Yes                |                |                   |               |
| Adjust and hold pH for dissolution  | To start pH        |                |                   |               |
| Stir to dissolve for                | 120 seconds        |                |                   |               |
| For dissolution, stir at            | 10%                |                |                   |               |
| <b>Carbonate purge</b>              |                    |                |                   |               |
| Perform a carbonate purge           | No                 |                |                   |               |
| <b>Temperature Control</b>          |                    |                |                   |               |
| Wait for temperature                | Yes                |                |                   |               |
| Required start temperature          | 25.0°C             |                |                   |               |
| Acceptable deviation                | 0.5°C              |                |                   |               |
| Time to wait                        | 60 seconds         |                |                   |               |
| Stir speed of                       | 50%                |                |                   |               |
| <b>Titration 1</b>                  |                    |                |                   |               |
| Titrate from                        | Low to high pH     |                |                   |               |
| Adjust to start pH                  | Yes                |                |                   |               |
| After pH adjust stir for            | 30 seconds         |                |                   |               |
| Stir to allow partitioning for      | 15 seconds         |                |                   |               |
| Stirrer speed for partitioning      | 50%                |                |                   |               |
| <b>Titration 2</b>                  |                    |                |                   |               |
| Titrate from                        | Low to high pH     |                |                   |               |
| Add additional water                | 0.00 mL            |                |                   |               |
| Additional partition solvent volume | 0.080 mL           |                |                   |               |
| Additional partition solvent added  | Automatic          |                |                   |               |
| After pH adjust stir for            | 30 seconds         |                |                   |               |
| Stir to allow partitioning for      | 15 seconds         |                |                   |               |
| Stirrer speed for partitioning      | 55%                |                |                   |               |



Sample name: **M11\_octanol** Experiment start time: **2/27/2018 10:54:30 PM**  
 Assay name: **pH-metric high logP** Analyst: **Pion**  
 Assay ID: **18B-27016** Instrument ID: **T312060**  
 Filename: **C:\Sirius\_T3\Mehtap\20180227\_exp27\_logP\_T3-2\18B-27016\_M11\_octanol\_pH-metric high logP.t3r**

## Assay Settings (continued)

| Setting                             | Value          | Original Value | Date/Time changed | Imported from |
|-------------------------------------|----------------|----------------|-------------------|---------------|
| <b>Titration 3</b>                  |                |                |                   |               |
| Titrate from                        | Low to high pH |                |                   |               |
| Add additional water                | 0.00 mL        |                |                   |               |
| Additional partition solvent volume | 0.200 mL       |                |                   |               |
| Additional partition solvent added  | Automatic      |                |                   |               |
| After pH adjust stir for            | 30 seconds     |                |                   |               |
| Stir to allow partitioning for      | 15 seconds     |                |                   |               |
| Stirrer speed for partitioning      | 60%            |                |                   |               |
| <b>Data Point Stability</b>         |                |                |                   |               |
| Stir during data point collection   | No             |                |                   |               |
| Delay before data point collection  | 0 seconds      |                |                   |               |
| Number of points to average         | 20 points      |                |                   |               |
| Time interval between points        | 0.50 seconds   |                |                   |               |
| Required maximum standard deviation | 0.00100 dpH/dt |                |                   |               |
| Stability timeout after             | 60 seconds     |                |                   |               |

## Calibration Settings

| Setting                   | Value  | Date/Time changed     | Imported from             |
|---------------------------|--------|-----------------------|---------------------------|
| Four-Plus alpha           | 0.130  | 2/27/2018 10:54:30 PM | C:\Sirius_T3\HCl18B27.t3r |
| Four-Plus S               | 0.9970 | 2/27/2018 10:54:30 PM | C:\Sirius_T3\HCl18B27.t3r |
| Four-Plus jH              | 0.8    | 2/27/2018 10:54:30 PM | C:\Sirius_T3\HCl18B27.t3r |
| Four-Plus jOH             | -0.4   | 2/27/2018 10:54:30 PM | C:\Sirius_T3\HCl18B27.t3r |
| Base concentration factor | 1.000  | 2/27/2018 10:54:30 PM | C:\Sirius_T3\KOH18B27.t3r |
| Acid concentration factor | 0.994  | 2/27/2018 10:54:30 PM | C:\Sirius_T3\HCl18B27.t3r |

## Instrument Settings

| Setting              | Value                      | Batch Id    | Install date           |
|----------------------|----------------------------|-------------|------------------------|
| Instrument owner     | Merck                      |             |                        |
| Instrument ID        | T312060                    |             |                        |
| Instrument type      | T3 Simulator               |             |                        |
| Software version     | 1.1.3.0                    |             |                        |
| Dispenser module     |                            | T3DM1200361 | 3/31/2009 5:24:52 AM   |
| Dispenser 0          | Water                      |             | 3/31/2009 5:25:05 AM   |
| Syringe volume       | 2.5 mL                     |             |                        |
| Firmware version     | 1.2.1(r2)                  |             |                        |
| Titrant              | Water (0.15 M KCl)         | 02-06-2018  | 2/27/2018 10:05:59 AM  |
| Dispenser 2          | Acid                       |             | 3/31/2009 5:25:11 AM   |
| Syringe volume       | 0.5 mL                     |             |                        |
| Firmware version     | 1.2.1(r2)                  |             |                        |
| Titrant              | Acid (0.5 M HCl)           | 02-27-2018  | 2/27/2018 10:27:22 AM  |
| Dispenser 1          | Base                       |             | 3/31/2009 5:25:21 AM   |
| Syringe volume       | 0.5 mL                     |             |                        |
| Firmware version     | 1.2.1(r2)                  |             |                        |
| Titrant              | Base (0.5 M KOH)           | 9/22/2017   | 2/27/2018 10:21:22 AM  |
| Dispenser 5          | Cosolvent                  |             | 3/31/2009 5:26:24 AM   |
| Syringe volume       | 2.5 mL                     |             |                        |
| Firmware version     | 1.2.1(r2)                  |             |                        |
| Distribution valve 5 | Distribution Valve         |             | 3/31/2009 5:28:19 AM   |
| Firmware version     | 1.1.3                      |             |                        |
| Port A               | Methanol (80%, 0.15 M KCl) | 09-26-17    | 2/7/2018 9:42:01 AM    |
| Port B               | Cyclohexane                | 11-01-17    | 2/27/2018 10:37:57 AM  |
| Dispenser 3          | Buffer                     |             | 8/3/2010 5:05:16 AM    |
| Syringe volume       | 0.5 mL                     |             |                        |
| Firmware version     | 1.2.1(r2)                  |             |                        |
| Titrant              | Dodecane                   | 2018/01/31  | 1/31/2018 12:26:26 PM  |
| Dispenser 6          | Octanol                    |             | 10/22/2010 10:52:43 AM |



Sample name: **M11\_octanol**  
 Assay name: **pH-metric high logP**  
 Assay ID: **18B-27016**  
 Filename: **C:\Sirius\_T3\Mehtap\20180227\_exp27\_logP\_T3-2\18B-27016\_M11\_octanol\_pH-metric high logP.t3r**

Experiment start time: **2/27/2018 10:54:30 PM**  
 Analyst: **Pion**  
 Instrument ID: **T312060**

## Instrument Settings (continued)

| Setting                                   | Value                      | Batch Id    | Install date           |
|-------------------------------------------|----------------------------|-------------|------------------------|
| Syringe volume                            | 0.5 mL                     |             |                        |
| Firmware version                          | 1.2.1(r2)                  |             |                        |
| Titration                                 | Octanol                    | 01-31-2018  | 2/27/2018 9:59:35 AM   |
| Titration                                 |                            | T3TM1200161 | 3/31/2009 5:24:17 AM   |
| Horizontal axis firmware version          | 1.17 AI1DI2DO2 Stepper 2   |             |                        |
| Vertical axis firmware version            | 1.17 AI1DI2DO2 Stepper 2   |             |                        |
| Chassis I/O firmware version              | 1.11 AI1DI0DO4 Norgren I/O |             |                        |
| Probe I/O firmware version                | 1.1.1                      |             |                        |
| Electrode                                 | T3 Electrode               | T3E0923     | 1/23/2018 2:01:00 PM   |
| E0 calibration                            | +2.59 mV                   |             | 2/27/2018 10:54:58 PM  |
| Filling solution                          | 3M KCl                     | KCL097      | 2/27/2018 9:49:43 AM   |
| Liquids                                   |                            |             |                        |
| Wash 1                                    | 50% IPA:50% Water          |             | 2/27/2018 9:49:58 AM   |
| Wash 2                                    | 0.5% Triton X-100 in H2O   |             | 2/27/2018 9:50:01 AM   |
| Buffer position 1                         | pH7 Wash                   |             | 2/27/2018 9:50:04 AM   |
| Buffer position 2                         | pH 7                       |             | 2/27/2018 9:50:06 AM   |
| Storage position                          |                            |             | 2/27/2018 9:55:12 AM   |
| Wash water                                | 9.2e+003 mL                | 02-27-2018  | 2/27/2018 9:54:39 AM   |
| Waste                                     | 6.2e+003 mL                |             | 11/28/2017 10:36:29 AM |
| Temperature controller                    |                            |             | 8/5/2010 6:35:13 AM    |
| Turbidity detector                        |                            |             | 3/31/2009 5:24:45 AM   |
| Spectrometer                              |                            | 074811      | 11/23/2010 11:22:28 AM |
| Dip probe                                 |                            | 10196       |                        |
| Wavelength coefficient A0                 | 183.333                    |             |                        |
| Wavelength coefficient A1                 | 2.21568                    |             |                        |
| Wavelength coefficient A2                 | -0.000289308               |             |                        |
| Total lamp lit time                       | 110:52:56                  |             | 11/23/2010 11:22:28 AM |
| Calibrated on                             | 2/27/2018 10:40:38 AM      |             |                        |
| Integration time                          | 40                         |             |                        |
| Scans averaged                            | 10                         |             |                        |
| Autoloader                                |                            | T3AL1200345 | 11/10/2015 9:34:13 AM  |
| Left-right axis firmware version          | 1.17 AI1DI2DO2 Stepper 2   |             |                        |
| Front-back axis firmware version          | 1.17 AI1DI2DO2 Stepper 2   |             |                        |
| Vertical axis firmware version            | 1.17 AI1DI2DO2 Stepper 2   |             |                        |
| Chassis I/O firmware version              | 1.11 AI1DI0DO4 Norgren I/O |             |                        |
| Configuration                             |                            |             |                        |
| Alternate titration position              | Titration position         |             |                        |
| Alternate reference position              | Reference position         |             |                        |
| Maximum standard vial volume              | 3.50 mL                    |             |                        |
| Maximum alternate vial volume             | 25.00 mL                   |             |                        |
| Automatic action idle period              | 5 minute(s)                |             |                        |
| Titration tube volume                     | 1.3 mL                     |             |                        |
| Syringe flush count                       | 3.50                       |             |                        |
| Flowing wash pump volume                  | 20.0 mL                    |             |                        |
| Flowing wash stir duration                | 5 s                        |             |                        |
| Flowing wash stir speed                   | 30%                        |             |                        |
| Solvent wash stir duration                | 5 s                        |             |                        |
| Solvent wash stir speed                   | 30%                        |             |                        |
| Surfactant wash stir duration             | 5 s                        |             |                        |
| Surfactant wash stir speed                | 30%                        |             |                        |
| E0 calibration minimum number of points   | 10                         |             |                        |
| E0 calibration maximum standard deviation | 0.01500                    |             |                        |
| E0 calibration timeout period             | 60 s                       |             |                        |
| E0 calibration stir duration              | 5 s                        |             |                        |
| E0 calibration preparation stir speed     | 30%                        |             |                        |
| E0 calibration buffer wash stir duration  | 5 s                        |             |                        |
| E0 calibration buffer wash stir speed     | 30%                        |             |                        |
| E0 calibration reading stir speed         | 0%                         |             |                        |

Sample name: **M11\_octanol** Experiment start time: **2/27/2018 10:54:30 PM**  
 Assay name: **pH-metric high logP** Analyst: **Pion**  
 Assay ID: **18B-27016** Instrument ID: **T312060**  
 Filename: **C:\Sirius\_T3\Mehtap\20180227\_exp27\_logP\_T3-2\18B-27016\_M11\_octanol\_pH-metric high logP.t3r**

## Instrument Settings (continued)

| Setting                                     | Value   | Batch Id | Install date |
|---------------------------------------------|---------|----------|--------------|
| Spectrometer calibration stir duration      | 5 s     |          |              |
| Spectrometer calibration stir speed         | 30%     |          |              |
| Spectrometer calibration wash pump volume   | 20.0 mL |          |              |
| Spectrometer calibration wash stir duration | 5 s     |          |              |
| Spectrometer calibration wash stir speed    | 30%     |          |              |
| Overhead dispense height                    | 10000   |          |              |

## Refinement Settings

| Setting                        | Value    | Default value |
|--------------------------------|----------|---------------|
| Turbidity detection method     | None     | None          |
| Turbidity wavelength to assess | 500.0 nm | 500.0 nm      |
| Turbidity maximum absorbance   | 0.100    | 0.100         |
| Turbidity probe threshold      | 50.00    | 50.00         |

## Experiment Log

[2:37] Air gap created for Water (0.15 M KCl)  
 [2:38] Air gap created for Acid (0.5 M HCl)  
 [2:38] Air gap created for Base (0.5 M KOH)  
 [2:39] Air gap released for Water (0.15 M KCl)  
 [2:42] Titrator arm moved over Titration position  
 [2:42] Titration 1 of 3  
 [2:42] Adding initial titrants  
 [2:42] Automatically add 1.50000 mL of water  
 [3:08] Dispensed 1.500000 mL of Water (0.15 M KCl)  
 [3:12] Titrator arm moved over Drain  
 [8:53] Titrator arm moved to Titration position  
 [8:53] Argon flow rate set to 100  
 [8:53] Stirrer speed set to 10  
 [8:58] Automatically add 0.02000 mL of Octanol  
 [8:59] Dispensed 0.019991 mL of Octanol  
 [9:00] Initial pH = 6.35  
 [9:00] Iterative adjust 6.35 -> 2.00  
 [9:00] pH 6.35 -> 2.00  
 [9:02] Air gap released for Acid (0.5 M HCl)  
 [9:02] Dispensed 0.051670 mL of Acid (0.5 M HCl)  
 [9:08] Holding pH 2.00  
 [11:08] Stirrer speed set to 0  
 [11:08] Stirrer speed set to 50  
 [11:08] Iterative adjust 1.97 -> 2.00  
 [11:08] pH 1.97 -> 2.00  
 [11:08] Air gap released for Base (0.5 M KOH)  
 [11:09] Dispensed 0.003010 mL of Base (0.5 M KOH)  
 [11:59] Stirrer speed set to 0  
 [12:10] Datapoint id 1 collected  
 [12:10] Stirrer speed set to 50  
 [12:15] pH 2.02 -> 2.22  
 [12:15] Using cautious pH adjust  
 [12:15] Dispensed 0.007573 mL of Base (0.5 M KOH)  
 [12:20] Stepping pH = 2.11  
 [12:20] Dispensed 0.005950 mL of Base (0.5 M KOH)  
 [12:25] Stepping pH = 2.20  
 [12:25] Dispensed 0.001411 mL of Base (0.5 M KOH)  
 [12:31] Stepping pH = 2.22  
 [12:46] Stirrer speed set to 0  
 [12:56] Datapoint id 2 collected  
 [12:56] Charge balance equation is out by 1.4%  
 [12:56] Stirrer speed set to 50

Sample name: **M11\_octanol**  
Assay name: **pH-metric high logP**  
Assay ID: **18B-27016**  
Filename: **C:\Sirius\_T3\Mehtap\20180227\_exp27\_logP\_T3-2\18B-27016\_M11\_octanol\_pH-metric high logP.t3r**

Experiment start time: **2/27/2018 10:54:30 PM**  
Analyst: **Pion**  
Instrument ID: **T312060**

## Experiment Log (continued)

[13:01] pH 2.22 -> 2.42  
[13:01] Using charge balance adjust  
[13:02] Dispensed 0.009525 mL of Base (0.5 M KOH)  
[13:22] Stirrer speed set to 0  
[13:32] Datapoint id 3 collected  
[13:32] Charge balance equation is out by -4.9%  
[13:32] Stirrer speed set to 50  
[13:37] pH 2.42 -> 2.62  
[13:37] Using charge balance adjust  
[13:37] Dispensed 0.006115 mL of Base (0.5 M KOH)  
[13:57] Stirrer speed set to 0  
[14:07] Datapoint id 4 collected  
[14:07] Charge balance equation is out by -14.8%  
[14:07] Stirrer speed set to 50  
[14:12] pH 2.60 -> 2.80  
[14:12] Using charge balance adjust  
[14:13] Dispensed 0.004186 mL of Base (0.5 M KOH)  
[14:33] Stirrer speed set to 0  
[14:43] Datapoint id 5 collected  
[14:43] Charge balance equation is out by 7.6%  
[14:43] Stirrer speed set to 50  
[14:48] pH 2.82 -> 3.02  
[14:48] Using charge balance adjust  
[14:49] Dispensed 0.002752 mL of Base (0.5 M KOH)  
[15:09] Stirrer speed set to 0  
[15:19] Datapoint id 6 collected  
[15:19] Charge balance equation is out by -19.4%  
[15:19] Stirrer speed set to 50  
[15:24] pH 2.99 -> 3.19  
[15:24] Using cautious pH adjust  
[15:24] Dispensed 0.001058 mL of Base (0.5 M KOH)  
[15:29] Stepping pH = 3.06  
[15:29] Dispensed 0.001152 mL of Base (0.5 M KOH)  
[15:34] Stepping pH = 3.16  
[15:35] Dispensed 0.000306 mL of Base (0.5 M KOH)  
[15:40] Stepping pH = 3.19  
[15:55] Stirrer speed set to 0  
[16:05] Datapoint id 7 collected  
[16:05] Charge balance equation is out by -18.8%  
[16:05] Stirrer speed set to 50  
[16:10] pH 3.19 -> 3.39  
[16:10] Using cautious pH adjust  
[16:10] Dispensed 0.000870 mL of Base (0.5 M KOH)  
[16:16] Stepping pH = 3.28  
[16:16] Dispensed 0.000706 mL of Base (0.5 M KOH)  
[16:21] Stepping pH = 3.36  
[16:21] Dispensed 0.000235 mL of Base (0.5 M KOH)  
[16:26] Stepping pH = 3.38  
[16:41] Stirrer speed set to 0  
[16:51] Datapoint id 8 collected  
[16:51] Charge balance equation is out by -2.8%  
[16:51] Stirrer speed set to 50  
[16:56] pH 3.38 -> 3.58  
[16:56] Using charge balance adjust  
[16:56] Dispensed 0.001576 mL of Base (0.5 M KOH)  
[17:17] Stirrer speed set to 0  
[17:27] Datapoint id 9 collected  
[17:27] Charge balance equation is out by -14.9%  
[17:27] Stirrer speed set to 50

Sample name: **M11\_octanol**  
 Assay name: **pH-metric high logP**  
 Assay ID: **18B-27016**  
 Filename: **C:\Sirius\_T3\Mehtap\20180227\_exp27\_logP\_T3-2\18B-27016\_M11\_octanol\_pH-metric high logP.t3r**

Experiment start time: **2/27/2018 10:54:30 PM**  
 Analyst: **Pion**  
 Instrument ID: **T312060**

## Experiment Log (continued)

[17:32] pH 3.55 -> 3.75  
 [17:32] Using charge balance adjust  
 [17:32] Dispensed 0.001529 mL of Base (0.5 M KOH)  
 [17:53] Stirrer speed set to 0  
 [18:03] Datapoint id 10 collected  
 [18:03] Charge balance equation is out by -21.5%  
 [18:03] Stirrer speed set to 50  
 [18:08] pH 3.71 -> 3.91  
 [18:08] Using cautious pH adjust  
 [18:08] Dispensed 0.000729 mL of Base (0.5 M KOH)  
 [18:13] Stepping pH = 3.79  
 [18:13] Dispensed 0.000729 mL of Base (0.5 M KOH)  
 [18:18] Stepping pH = 3.89  
 [18:18] Dispensed 0.000118 mL of Base (0.5 M KOH)  
 [18:23] Stepping pH = 3.90  
 [18:23] Dispensed 0.000118 mL of Base (0.5 M KOH)  
 [18:28] Stepping pH = 3.91  
 [18:44] Stirrer speed set to 0  
 [18:54] Datapoint id 11 collected  
 [18:54] Charge balance equation is out by -16.0%  
 [18:54] Stirrer speed set to 50  
 [18:59] pH 3.91 -> 4.11  
 [18:59] Using cautious pH adjust  
 [18:59] Dispensed 0.000682 mL of Base (0.5 M KOH)  
 [19:04] Stepping pH = 4.01  
 [19:04] Dispensed 0.000517 mL of Base (0.5 M KOH)  
 [19:10] Stepping pH = 4.11  
 [19:25] Stirrer speed set to 0  
 [19:35] Datapoint id 12 collected  
 [19:35] Charge balance equation is out by 12.1%  
 [19:35] Stirrer speed set to 50  
 [19:40] pH 4.12 -> 4.32  
 [19:40] Using charge balance adjust  
 [19:40] Dispensed 0.001199 mL of Base (0.5 M KOH)  
 [20:00] Stirrer speed set to 0  
 [20:11] Datapoint id 13 collected  
 [20:11] Charge balance equation is out by 71.5%  
 [20:11] Stirrer speed set to 50  
 [20:16] pH 4.46 -> 4.66  
 [20:16] Using cautious pH adjust  
 [20:16] Dispensed 0.000400 mL of Base (0.5 M KOH)  
 [20:21] Stepping pH = 4.58  
 [20:21] Dispensed 0.000188 mL of Base (0.5 M KOH)  
 [20:26] Stepping pH = 4.68  
 [20:41] Stirrer speed set to 0  
 [20:51] Datapoint id 14 collected  
 [20:51] Charge balance equation is out by 26.5%  
 [20:51] Stirrer speed set to 50  
 [20:56] pH 4.73 -> 4.93  
 [20:56] Using cautious pH adjust  
 [20:56] Dispensed 0.000259 mL of Base (0.5 M KOH)  
 [21:02] Stepping pH = 4.86  
 [21:02] Dispensed 0.000118 mL of Base (0.5 M KOH)  
 [21:07] Stepping pH = 4.98  
 [21:22] Stirrer speed set to 0  
 [21:34] Datapoint id 15 collected  
 [21:34] Charge balance equation is out by 28.5%  
 [21:34] Stirrer speed set to 50  
 [21:39] pH 5.06 -> 5.26

Sample name: **M11\_octanol**  
 Assay name: **pH-metric high logP**  
 Assay ID: **18B-27016**  
 Filename: **C:\Sirius\_T3\Mehtap\20180227\_exp27\_logP\_T3-2\18B-27016\_M11\_octanol\_pH-metric high logP.t3r**

Experiment start time: **2/27/2018 10:54:30 PM**  
 Analyst: **Pion**  
 Instrument ID: **T312060**

## Experiment Log (continued)

[21:39] Using cautious pH adjust  
 [21:40] Dispensed 0.000141 mL of Base (0.5 M KOH)  
 [21:45] Stepping pH = 5.13  
 [21:45] Dispensed 0.000141 mL of Base (0.5 M KOH)  
 [21:50] Stepping pH = 5.52  
 [22:05] Stirrer speed set to 0  
 [22:23] Datapoint id 16 collected  
 [22:23] Charge balance equation is out by -5.6%  
 [22:23] Stirrer speed set to 50  
 [22:29] pH 5.70 -> 5.90  
 [22:29] Using charge balance adjust  
 [22:29] Dispensed 0.000094 mL of Base (0.5 M KOH)  
 [22:49] Stirrer speed set to 0  
 [23:07] Datapoint id 17 collected  
 [23:07] Charge balance equation is out by -30.7%  
 [23:07] Stirrer speed set to 50  
 [23:12] pH 5.93 -> 6.13  
 [23:12] Using cautious pH adjust  
 [23:12] Dispensed 0.000047 mL of Base (0.5 M KOH)  
 [23:17] Stepping pH = 5.95  
 [23:17] Dispensed 0.000094 mL of Base (0.5 M KOH)  
 [23:22] Stepping pH = 7.00  
 [23:37] Stirrer speed set to 0  
 [24:37] Datapoint id 18 collected  
 [24:37] Charge balance equation is out by -81.0%  
 [24:37] Stirrer speed set to 50  
 [24:42] pH 8.28 -> 8.48  
 [24:42] Using cautious pH adjust  
 [24:42] Dispensed 0.000024 mL of Base (0.5 M KOH)  
 [24:48] Stepping pH = 8.30  
 [24:48] Dispensed 0.000024 mL of Base (0.5 M KOH)  
 [24:53] Stepping pH = 8.31  
 [24:53] Dispensed 0.000047 mL of Base (0.5 M KOH)  
 [24:58] Stepping pH = 8.37  
 [24:58] Dispensed 0.000047 mL of Base (0.5 M KOH)  
 [25:03] Stepping pH = 8.51  
 [25:18] Stirrer speed set to 0  
 [26:03] Datapoint id 19 collected  
 [26:03] Charge balance equation is out by -1,164.1%  
 [26:03] Stirrer speed set to 50  
 [26:08] pH 8.73 -> 8.93  
 [26:08] Using cautious pH adjust  
 [26:08] Dispensed 0.000024 mL of Base (0.5 M KOH)  
 [26:13] Stepping pH = 8.74  
 [26:13] Dispensed 0.000024 mL of Base (0.5 M KOH)  
 [26:18] Stepping pH = 8.75  
 [26:18] Dispensed 0.000094 mL of Base (0.5 M KOH)  
 [26:23] Stepping pH = 9.13  
 [26:38] Stirrer speed set to 0  
 [27:07] Datapoint id 20 collected  
 [27:07] Charge balance equation is out by -543.2%  
 [27:07] Titration 2 of 3  
 [27:07] Adding initial titrants  
 [27:07] Automatically add 0.08000 mL of Octanol  
 [27:09] Dispensed 0.080009 mL of Octanol  
 [27:09] Stirrer speed set to 10  
 [27:10] Stirrer speed set to 55  
 [27:10] Iterative adjust 9.27 -> 2.00  
 [27:10] pH 9.27 -> 2.00

Sample name: **M11\_octanol**  
Assay name: **pH-metric high logP**  
Assay ID: **18B-27016**  
Filename: **C:\Sirius\_T3\Mehtap\20180227\_exp27\_logP\_T3-2\18B-27016\_M11\_octanol\_pH-metric high logP.t3r**

Experiment start time: **2/27/2018 10:54:30 PM**  
Analyst: **Pion**  
Instrument ID: **T312060**

## Experiment Log (continued)

[27:12] Dispensed 0.054798 mL of Acid (0.5 M HCl)  
[27:17] pH 2.02 -> 2.00  
[27:17] Dispensed 0.001952 mL of Acid (0.5 M HCl)  
[28:07] Stirrer speed set to 0  
[28:17] Datapoint id 21 collected  
[28:17] Stirrer speed set to 55  
[28:22] pH 1.97 -> 2.17  
[28:22] Using cautious pH adjust  
[28:23] Dispensed 0.009102 mL of Base (0.5 M KOH)  
[28:28] Stepping pH = 2.07  
[28:28] Dispensed 0.005833 mL of Base (0.5 M KOH)  
[28:33] Stepping pH = 2.14  
[28:33] Dispensed 0.002516 mL of Base (0.5 M KOH)  
[28:39] Stepping pH = 2.17  
[28:54] Stirrer speed set to 0  
[29:04] Datapoint id 22 collected  
[29:04] Charge balance equation is out by 4.1%  
[29:04] Stirrer speed set to 55  
[29:09] pH 2.17 -> 2.37  
[29:09] Using charge balance adjust  
[29:10] Dispensed 0.011571 mL of Base (0.5 M KOH)  
[29:30] Stirrer speed set to 0  
[29:40] Datapoint id 23 collected  
[29:40] Charge balance equation is out by 4.1%  
[29:40] Stirrer speed set to 55  
[29:45] pH 2.39 -> 2.59  
[29:45] Using charge balance adjust  
[29:46] Dispensed 0.007173 mL of Base (0.5 M KOH)  
[30:06] Stirrer speed set to 0  
[30:16] Datapoint id 24 collected  
[30:16] Charge balance equation is out by -13.1%  
[30:16] Stirrer speed set to 55  
[30:21] pH 2.57 -> 2.77  
[30:21] Using charge balance adjust  
[30:21] Dispensed 0.004915 mL of Base (0.5 M KOH)  
[30:42] Stirrer speed set to 0  
[30:52] Datapoint id 25 collected  
[30:52] Charge balance equation is out by -15.1%  
[30:52] Stirrer speed set to 55  
[30:57] pH 2.75 -> 2.95  
[30:57] Using cautious pH adjust  
[30:57] Dispensed 0.001764 mL of Base (0.5 M KOH)  
[31:02] Stepping pH = 2.81  
[31:02] Dispensed 0.002093 mL of Base (0.5 M KOH)  
[31:07] Stepping pH = 2.92  
[31:07] Dispensed 0.000470 mL of Base (0.5 M KOH)  
[31:12] Stepping pH = 2.95  
[31:27] Stirrer speed set to 0  
[31:37] Datapoint id 26 collected  
[31:37] Charge balance equation is out by -22.6%  
[31:37] Stirrer speed set to 55  
[31:43] pH 2.95 -> 3.15  
[31:43] Using cautious pH adjust  
[31:43] Dispensed 0.001294 mL of Base (0.5 M KOH)  
[31:48] Stepping pH = 3.06  
[31:48] Dispensed 0.000753 mL of Base (0.5 M KOH)  
[31:53] Stepping pH = 3.12  
[31:53] Dispensed 0.000306 mL of Base (0.5 M KOH)  
[31:58] Stepping pH = 3.15



Sample name: **M11\_octanol**  
Assay name: **pH-metric high logP**  
Assay ID: **18B-27016**  
Filename: **C:\Sirius\_T3\Mehtap\20180227\_exp27\_logP\_T3-2\18B-27016\_M11\_octanol\_pH-metric high logP.t3r**

Experiment start time: **2/27/2018 10:54:30 PM**  
Analyst: **Pion**  
Instrument ID: **T312060**

## Experiment Log (continued)

[32:13] Stirrer speed set to 0  
[32:23] Datapoint id 27 collected  
[32:23] Charge balance equation is out by 9.1%  
[32:23] Stirrer speed set to 55  
[32:28] pH 3.15 -> 3.35  
[32:28] Using charge balance adjust  
[32:29] Dispensed 0.002093 mL of Base (0.5 M KOH)  
[32:49] Stirrer speed set to 0  
[32:59] Datapoint id 28 collected  
[32:59] Charge balance equation is out by -11.4%  
[32:59] Stirrer speed set to 55  
[33:04] pH 3.34 -> 3.54  
[33:04] Using charge balance adjust  
[33:04] Dispensed 0.001858 mL of Base (0.5 M KOH)  
[33:24] Stirrer speed set to 0  
[33:34] Datapoint id 29 collected  
[33:34] Charge balance equation is out by 3.5%  
[33:34] Stirrer speed set to 55  
[33:39] pH 3.55 -> 3.75  
[33:39] Using charge balance adjust  
[33:39] Dispensed 0.001670 mL of Base (0.5 M KOH)  
[34:00] Stirrer speed set to 0  
[34:10] Datapoint id 30 collected  
[34:10] Charge balance equation is out by 67.8%  
[34:10] Stirrer speed set to 55  
[34:15] pH 3.89 -> 4.09  
[34:15] Using cautious pH adjust  
[34:15] Dispensed 0.000659 mL of Base (0.5 M KOH)  
[34:20] Stepping pH = 4.11  
[34:35] Stirrer speed set to 0  
[34:46] Datapoint id 31 collected  
[34:46] Charge balance equation is out by 50.0%  
[34:46] Stirrer speed set to 55  
[34:51] pH 4.14 -> 4.34  
[34:51] Using cautious pH adjust  
[34:51] Dispensed 0.000494 mL of Base (0.5 M KOH)  
[34:56] Stepping pH = 4.42  
[35:11] Stirrer speed set to 0  
[35:22] Datapoint id 32 collected  
[35:22] Charge balance equation is out by 50.0%  
[35:22] Stirrer speed set to 55  
[35:27] pH 4.45 -> 4.65  
[35:27] Using cautious pH adjust  
[35:27] Dispensed 0.000306 mL of Base (0.5 M KOH)  
[35:32] Stepping pH = 4.69  
[35:47] Stirrer speed set to 0  
[35:59] Datapoint id 33 collected  
[35:59] Charge balance equation is out by 50.0%  
[35:59] Stirrer speed set to 55  
[36:04] pH 4.85 -> 5.05  
[36:04] Using cautious pH adjust  
[36:04] Dispensed 0.000141 mL of Base (0.5 M KOH)  
[36:09] Stepping pH = 4.91  
[36:09] Dispensed 0.000165 mL of Base (0.5 M KOH)  
[36:14] Stepping pH = 5.80  
[36:29] Stirrer speed set to 0  
[37:21] Datapoint id 34 collected  
[37:21] Charge balance equation is out by -5.2%  
[37:21] Stirrer speed set to 55

Sample name: **M11\_octanol**  
Assay name: **pH-metric high logP**  
Assay ID: **18B-27016**  
Filename: **C:\Sirius\_T3\Mehtap\20180227\_exp27\_logP\_T3-2\18B-27016\_M11\_octanol\_pH-metric high logP.t3r**

Experiment start time: **2/27/2018 10:54:30 PM**  
Analyst: **Pion**  
Instrument ID: **T312060**

## Experiment Log (continued)

[37:27] pH 6.56 -> 6.76  
[37:27] Using charge balance adjust  
[37:27] Dispensed 0.000047 mL of Base (0.5 M KOH)  
[37:47] Stirrer speed set to 0  
[38:45] Datapoint id 35 collected  
[38:45] Charge balance equation is out by -43.3%  
[38:45] Stirrer speed set to 55  
[38:51] pH 6.84 -> 7.04  
[38:51] Using cautious pH adjust  
[38:51] Dispensed 0.000024 mL of Base (0.5 M KOH)  
[38:56] Stepping pH = 6.89  
[38:56] Dispensed 0.000024 mL of Base (0.5 M KOH)  
[39:01] Stepping pH = 6.95  
[39:01] Dispensed 0.000024 mL of Base (0.5 M KOH)  
[39:06] Stepping pH = 7.16  
[39:21] Stirrer speed set to 0  
[40:21] Datapoint id 36 collected  
[40:21] Charge balance equation is out by -119.4%  
[40:21] Stirrer speed set to 55  
[40:26] pH 7.34 -> 7.54  
[40:26] Using cautious pH adjust  
[40:26] Dispensed 0.000024 mL of Base (0.5 M KOH)  
[40:31] Stepping pH = 7.43  
[40:31] Dispensed 0.000024 mL of Base (0.5 M KOH)  
[40:36] Stepping pH = 7.48  
[40:36] Dispensed 0.000024 mL of Base (0.5 M KOH)  
[40:42] Stepping pH = 7.57  
[40:57] Stirrer speed set to 0  
[41:57] Datapoint id 37 collected  
[41:57] Charge balance equation is out by -407.6%  
[41:57] Stirrer speed set to 55  
[42:02] pH 7.81 -> 8.01  
[42:02] Using cautious pH adjust  
[42:02] Dispensed 0.000024 mL of Base (0.5 M KOH)  
[42:07] Stepping pH = 7.83  
[42:07] Dispensed 0.000024 mL of Base (0.5 M KOH)  
[42:12] Stepping pH = 7.87  
[42:12] Dispensed 0.000024 mL of Base (0.5 M KOH)  
[42:17] Stepping pH = 7.91  
[42:17] Dispensed 0.000024 mL of Base (0.5 M KOH)  
[42:22] Stepping pH = 8.04  
[42:37] Stirrer speed set to 0  
[43:37] Datapoint id 38 collected  
[43:37] Charge balance equation is out by -1,031.4%  
[43:37] Stirrer speed set to 55  
[43:42] pH 8.38 -> 8.58  
[43:42] Using cautious pH adjust  
[43:42] Dispensed 0.000024 mL of Base (0.5 M KOH)  
[43:48] Stepping pH = 8.40  
[43:48] Dispensed 0.000024 mL of Base (0.5 M KOH)  
[43:53] Stepping pH = 8.43  
[43:53] Dispensed 0.000047 mL of Base (0.5 M KOH)  
[43:58] Stepping pH = 8.58  
[44:13] Stirrer speed set to 0  
[44:58] Datapoint id 39 collected  
[44:58] Charge balance equation is out by -519.7%  
[44:58] Stirrer speed set to 55  
[45:03] pH 8.70 -> 8.90  
[45:03] Using cautious pH adjust



Sample name: **M11\_octanol**  
Assay name: **pH-metric high logP**  
Assay ID: **18B-27016**  
Filename: **C:\Sirius\_T3\Mehtap\20180227\_exp27\_logP\_T3-2\18B-27016\_M11\_octanol\_pH-metric high logP.t3r**

Experiment start time: **2/27/2018 10:54:30 PM**  
Analyst: **Pion**  
Instrument ID: **T312060**

## Experiment Log (continued)

[45:03] Dispensed 0.000024 mL of Base (0.5 M KOH)  
[45:08] Stepping pH = 8.70  
[45:08] Dispensed 0.000024 mL of Base (0.5 M KOH)  
[45:13] Stepping pH = 8.71  
[45:13] Dispensed 0.000094 mL of Base (0.5 M KOH)  
[45:18] Stepping pH = 9.07  
[45:33] Stirrer speed set to 0  
[45:48] Datapoint id 40 collected  
[45:48] Charge balance equation is out by -554.5%  
[45:48] Titration 3 of 3  
[45:48] Adding initial titrants  
[45:48] Automatically add 0.20000 mL of Octanol  
[45:53] Dispensed 0.200000 mL of Octanol  
[45:53] Stirrer speed set to 10  
[45:54] Stirrer speed set to 60  
[45:54] Iterative adjust 9.28 -> 2.00  
[45:54] pH 9.28 -> 2.00  
[45:55] Dispensed 0.057761 mL of Acid (0.5 M HCl)  
[46:00] pH 2.01 -> 2.00  
[46:01] Dispensed 0.001294 mL of Acid (0.5 M HCl)  
[46:51] Stirrer speed set to 0  
[47:01] Datapoint id 41 collected  
[47:01] Stirrer speed set to 60  
[47:06] pH 1.97 -> 2.17  
[47:06] Using cautious pH adjust  
[47:06] Dispensed 0.009901 mL of Base (0.5 M KOH)  
[47:11] Stepping pH = 2.05  
[47:12] Dispensed 0.007926 mL of Base (0.5 M KOH)  
[47:17] Stepping pH = 2.13  
[47:17] Dispensed 0.003057 mL of Base (0.5 M KOH)  
[47:22] Stepping pH = 2.17  
[47:37] Stirrer speed set to 0  
[47:48] Datapoint id 42 collected  
[47:48] Charge balance equation is out by -5.4%  
[47:48] Stirrer speed set to 60  
[47:53] pH 2.17 -> 2.37  
[47:53] Using charge balance adjust  
[47:53] Dispensed 0.012488 mL of Base (0.5 M KOH)  
[48:14] Stirrer speed set to 0  
[48:24] Datapoint id 43 collected  
[48:24] Charge balance equation is out by -4.2%  
[48:24] Stirrer speed set to 60  
[48:29] pH 2.37 -> 2.57  
[48:29] Using charge balance adjust  
[48:29] Dispensed 0.008184 mL of Base (0.5 M KOH)  
[48:49] Stirrer speed set to 0  
[49:00] Datapoint id 44 collected  
[49:00] Charge balance equation is out by -4.0%  
[49:00] Stirrer speed set to 60  
[49:05] pH 2.57 -> 2.77  
[49:05] Using charge balance adjust  
[49:05] Dispensed 0.005503 mL of Base (0.5 M KOH)  
[49:25] Stirrer speed set to 0  
[49:35] Datapoint id 45 collected  
[49:35] Charge balance equation is out by -14.9%  
[49:35] Stirrer speed set to 60  
[49:40] pH 2.74 -> 2.94  
[49:40] Using charge balance adjust  
[49:41] Dispensed 0.004022 mL of Base (0.5 M KOH)

Sample name: **M11\_octanol**  
 Assay name: **pH-metric high logP**  
 Assay ID: **18B-27016**  
 Filename: **C:\Sirius\_T3\Mehtap\20180227\_exp27\_logP\_T3-2\18B-27016\_M11\_octanol\_pH-metric high logP.t3r**

Experiment start time: **2/27/2018 10:54:30 PM**  
 Analyst: **Pion**  
 Instrument ID: **T312060**

## Experiment Log (continued)

[50:01] Stirrer speed set to 0  
 [50:11] Datapoint id 46 collected  
 [50:11] Charge balance equation is out by -5.7%  
 [50:11] Stirrer speed set to 60  
 [50:16] pH 2.94 -> 3.14  
 [50:16] Using charge balance adjust  
 [50:16] Dispensed 0.003057 mL of Base (0.5 M KOH)  
 [50:36] Stirrer speed set to 0  
 [50:46] Datapoint id 47 collected  
 [50:46] Charge balance equation is out by 0.9%  
 [50:46] Stirrer speed set to 60  
 [50:52] pH 3.14 -> 3.34  
 [50:52] Using charge balance adjust  
 [50:52] Dispensed 0.002446 mL of Base (0.5 M KOH)  
 [51:12] Stirrer speed set to 0  
 [51:22] Datapoint id 48 collected  
 [51:22] Charge balance equation is out by 52.1%  
 [51:22] Stirrer speed set to 60  
 [51:27] pH 3.45 -> 3.65  
 [51:27] Using cautious pH adjust  
 [51:28] Dispensed 0.000917 mL of Base (0.5 M KOH)  
 [51:33] Stepping pH = 3.65  
 [51:48] Stirrer speed set to 0  
 [51:58] Datapoint id 49 collected  
 [51:58] Charge balance equation is out by 50.0%  
 [51:58] Stirrer speed set to 60  
 [52:03] pH 3.65 -> 3.85  
 [52:03] Using cautious pH adjust  
 [52:03] Dispensed 0.000729 mL of Base (0.5 M KOH)  
 [52:08] Stepping pH = 3.89  
 [52:23] Stirrer speed set to 0  
 [52:33] Datapoint id 50 collected  
 [52:33] Charge balance equation is out by 50.0%  
 [52:33] Stirrer speed set to 60  
 [52:38] pH 3.90 -> 4.10  
 [52:38] Using cautious pH adjust  
 [52:39] Dispensed 0.000517 mL of Base (0.5 M KOH)  
 [52:44] Stepping pH = 4.06  
 [52:44] Dispensed 0.000094 mL of Base (0.5 M KOH)  
 [52:49] Stepping pH = 4.08  
 [52:49] Dispensed 0.000071 mL of Base (0.5 M KOH)  
 [52:54] Stepping pH = 4.12  
 [53:09] Stirrer speed set to 0  
 [53:19] Datapoint id 51 collected  
 [53:19] Charge balance equation is out by 33.8%  
 [53:19] Stirrer speed set to 60  
 [53:24] pH 4.14 -> 4.34  
 [53:24] Using cautious pH adjust  
 [53:24] Dispensed 0.000353 mL of Base (0.5 M KOH)  
 [53:29] Stepping pH = 4.47  
 [53:44] Stirrer speed set to 0  
 [53:54] Datapoint id 52 collected  
 [53:54] Charge balance equation is out by 50.0%  
 [53:54] Stirrer speed set to 60  
 [54:00] pH 4.52 -> 4.72  
 [54:00] Using cautious pH adjust  
 [54:00] Dispensed 0.000165 mL of Base (0.5 M KOH)  
 [54:05] Stepping pH = 4.67  
 [54:05] Dispensed 0.000047 mL of Base (0.5 M KOH)

Sample name: **M11\_octanol**  
Assay name: **pH-metric high logP**  
Assay ID: **18B-27016**  
Filename: **C:\Sirius\_T3\Mehtap\20180227\_exp27\_logP\_T3-2\18B-27016\_M11\_octanol\_pH-metric high logP.t3r**

Experiment start time: **2/27/2018 10:54:30 PM**  
Analyst: **Pion**  
Instrument ID: **T312060**

## Experiment Log (continued)

[54:10] Stepping pH = 4.69  
[54:10] Dispensed 0.000047 mL of Base (0.5 M KOH)  
[54:15] Stepping pH = 4.78  
[54:30] Stirrer speed set to 0  
[54:43] Datapoint id 53 collected  
[54:43] Charge balance equation is out by 22.1%  
[54:43] Stirrer speed set to 60  
[54:48] pH 4.89 -> 5.09  
[54:48] Using cautious pH adjust  
[54:48] Dispensed 0.000071 mL of Base (0.5 M KOH)  
[54:53] Stepping pH = 4.94  
[54:53] Dispensed 0.000118 mL of Base (0.5 M KOH)  
[54:58] Stepping pH = 6.12  
[55:13] Stirrer speed set to 0  
[55:51] Datapoint id 54 collected  
[55:51] Charge balance equation is out by -21.1%  
[55:51] Stirrer speed set to 60  
[55:56] pH 6.13 -> 6.33  
[55:56] Using cautious pH adjust  
[55:56] Dispensed 0.000024 mL of Base (0.5 M KOH)  
[56:01] Stepping pH = 6.16  
[56:01] Dispensed 0.000071 mL of Base (0.5 M KOH)  
[56:06] Stepping pH = 6.51  
[56:21] Stirrer speed set to 0  
[57:21] Datapoint id 55 collected  
[57:21] Charge balance equation is out by -82.3%  
[57:21] Stirrer speed set to 60  
[57:26] pH 6.85 -> 7.05  
[57:26] Using cautious pH adjust  
[57:26] Dispensed 0.000024 mL of Base (0.5 M KOH)  
[57:31] Stepping pH = 6.94  
[57:31] Dispensed 0.000024 mL of Base (0.5 M KOH)  
[57:37] Stepping pH = 7.01  
[57:37] Dispensed 0.000024 mL of Base (0.5 M KOH)  
[57:42] Stepping pH = 7.10  
[57:57] Stirrer speed set to 0  
[58:57] Datapoint id 56 collected  
[58:57] Charge balance equation is out by -92.6%  
[58:57] Stirrer speed set to 60  
[59:02] pH 7.25 -> 7.45  
[59:02] Using cautious pH adjust  
[59:02] Dispensed 0.000024 mL of Base (0.5 M KOH)  
[59:07] Stepping pH = 7.33  
[59:07] Dispensed 0.000024 mL of Base (0.5 M KOH)  
[59:12] Stepping pH = 7.49  
[59:27] Stirrer speed set to 0  
[1:00:27] Datapoint id 57 collected  
[1:00:27] Charge balance equation is out by -136.9%  
[1:00:27] Stirrer speed set to 60  
[1:00:32] pH 7.57 -> 7.77  
[1:00:32] Using cautious pH adjust  
[1:00:32] Dispensed 0.000024 mL of Base (0.5 M KOH)  
[1:00:38] Stepping pH = 7.65  
[1:00:38] Dispensed 0.000024 mL of Base (0.5 M KOH)  
[1:00:43] Stepping pH = 7.74  
[1:00:43] Dispensed 0.000024 mL of Base (0.5 M KOH)  
[1:00:48] Stepping pH = 7.91  
[1:01:03] Stirrer speed set to 0  
[1:02:03] Datapoint id 58 collected

Sample name: **M11\_octanol**  
 Assay name: **pH-metric high logP**  
 Assay ID: **18B-27016**  
 Filename: **C:\Sirius\_T3\Mehtap\20180227\_exp27\_logP\_T3-2\18B-27016\_M11\_octanol\_pH-metric high logP.t3r**

Experiment start time: **2/27/2018 10:54:30 PM**  
 Analyst: **Pion**  
 Instrument ID: **T312060**

## Experiment Log (continued)

[1:02:03] Charge balance equation is out by -478.6%  
 [1:02:03] Stirrer speed set to 60  
 [1:02:08] pH 8.11 -> 8.31  
 [1:02:08] Using cautious pH adjust  
 [1:02:08] Dispensed 0.000024 mL of Base (0.5 M KOH)  
 [1:02:13] Stepping pH = 8.12  
 [1:02:13] Dispensed 0.000024 mL of Base (0.5 M KOH)  
 [1:02:18] Stepping pH = 8.20  
 [1:02:19] Dispensed 0.000024 mL of Base (0.5 M KOH)  
 [1:02:24] Stepping pH = 8.30  
 [1:02:39] Stirrer speed set to 0  
 [1:03:30] Datapoint id 59 collected  
 [1:03:30] Charge balance equation is out by -552.5%  
 [1:03:30] Stirrer speed set to 60  
 [1:03:35] pH 8.41 -> 8.61  
 [1:03:35] Using cautious pH adjust  
 [1:03:35] Dispensed 0.000024 mL of Base (0.5 M KOH)  
 [1:03:40] Stepping pH = 8.43  
 [1:03:40] Dispensed 0.000024 mL of Base (0.5 M KOH)  
 [1:03:45] Stepping pH = 8.46  
 [1:03:45] Dispensed 0.000047 mL of Base (0.5 M KOH)  
 [1:03:50] Stepping pH = 8.58  
 [1:03:51] Dispensed 0.000024 mL of Base (0.5 M KOH)  
 [1:03:56] Stepping pH = 8.71  
 [1:04:11] Stirrer speed set to 0  
 [1:04:35] Datapoint id 60 collected  
 [1:04:35] Charge balance equation is out by -623.7%  
 [1:04:35] Stirrer speed set to 60  
 [1:04:40] pH 8.77 -> 8.97  
 [1:04:40] Using cautious pH adjust  
 [1:04:40] Dispensed 0.000024 mL of Base (0.5 M KOH)  
 [1:04:45] Stepping pH = 8.78  
 [1:04:45] Dispensed 0.000047 mL of Base (0.5 M KOH)  
 [1:04:50] Stepping pH = 8.84  
 [1:04:50] Dispensed 0.000047 mL of Base (0.5 M KOH)  
 [1:04:55] Stepping pH = 8.97  
 [1:05:11] Stirrer speed set to 0  
 [1:05:37] Datapoint id 61 collected  
 [1:05:37] Charge balance equation is out by -302.6%  
 [1:05:37] Stirrer speed set to 60  
 [1:05:42] pH 9.03 -> 9.05  
 [1:05:42] Using cautious pH adjust  
 [1:05:57] Stirrer speed set to 0  
 [1:06:16] Datapoint id 62 collected  
 [1:06:16] Charge balance equation is out by 100.0%  
 [1:06:16] Argon flow rate set to 0  
 [1:06:20] Titrator arm moved over Titration position
