# Supplementary material for: Octanol-water partition coefficient measurements for the SAMPL6 Blind Prediction Challenge
Source: bioRxiv or medRxiv preprint supplement (doi:10.1101/757393), 2019-12-02
Supplement: Supplementary file [file media-2.zip]

Sample name: **M09\_octanol**  
 Assay name: **pH-metric high logP**  
 Assay ID: **18C-02010**  
 Filename: **C:\Sirius\_T3\Mehtap\20180302\_exp29\_logP\_T3-2\18C-02010\_M09\_octanol\_pH-metric high logP.t3r**

Experiment start time: **3/2/2018 10:00:20 PM**  
 Analyst: **Pion**  
 Instrument ID: **T312060**

## pH-metric Result

logP (XH +) -9.50 ±0.85 (n=47)  
 logP (neutral X) 2.90 ±0.02 (n=47)

### 18C-02010 Points 1 to 22

M09\_octanol concentration factor 1.064  
 Carbonate 0.0587 mM  
 Acidity error -0.83134 mM

### 18C-02010 Points 23 to 44

M09\_octanol concentration factor 0.800  
 Carbonate 0.0538 mM  
 Acidity error -0.43636 mM

### 18C-02010 Points 45 to 64

M09\_octanol concentration factor 1.103  
 Carbonate 0.1700 mM  
 Acidity error -0.97715 mM

## Warnings and errors

Errors None  
 Warnings One or more logP values out of range

## Sample logD and percent species

| pH     | M09_octanol<br>logD | M09_octanol<br>M09_octanolH | M09_octanol<br>M09_octanol | M09_octanol<br>M09_octanolH* | M09_octanol<br>M09_octanol* | Comment    |
|--------|---------------------|-----------------------------|----------------------------|------------------------------|-----------------------------|------------|
| 1.000  | -1.47               | 96.71 %                     | 0.00 %                     | 0.00 %                       | 3.29 %                      | Stomach pH |
| 1.200  | -1.27               | 94.88 %                     | 0.01 %                     | 0.00 %                       | 5.11 %                      |            |
| 2.000  | -0.47               | 74.60 %                     | 0.03 %                     | 0.00 %                       | 25.37 %                     |            |
| 3.000  | 0.53                | 22.70 %                     | 0.10 %                     | 0.00 %                       | 77.20 %                     |            |
| 4.000  | 1.51                | 2.85 %                      | 0.12 %                     | 0.00 %                       | 97.03 %                     |            |
| 5.000  | 2.38                | 0.29 %                      | 0.12 %                     | 0.00 %                       | 99.58 %                     | Blood pH   |
| 6.000  | 2.81                | 0.03 %                      | 0.13 %                     | 0.00 %                       | 99.85 %                     |            |
| 6.500  | 2.87                | 0.01 %                      | 0.13 %                     | 0.00 %                       | 99.87 %                     |            |
| 7.000  | 2.89                | 0.00 %                      | 0.13 %                     | 0.00 %                       | 99.87 %                     |            |
| 7.400  | 2.90                | 0.00 %                      | 0.13 %                     | 0.00 %                       | 99.87 %                     |            |
| 8.000  | 2.90                | 0.00 %                      | 0.13 %                     | 0.00 %                       | 99.87 %                     |            |
| 9.000  | 2.90                | 0.00 %                      | 0.13 %                     | 0.00 %                       | 99.87 %                     |            |
| 10.000 | 2.90                | 0.00 %                      | 0.13 %                     | 0.00 %                       | 99.87 %                     |            |
| 11.000 | 2.90                | 0.00 %                      | 0.13 %                     | 0.00 %                       | 99.87 %                     |            |
| 12.000 | 2.90                | 0.00 %                      | 0.13 %                     | 0.00 %                       | 99.87 %                     |            |

Sample name: **M09\_octanol**  
 Assay name: **pH-metric high logP**  
 Assay ID: **18C-02010**  
 Filename: **C:\Sirius\_T3\Mehtap\20180302\_exp29\_logP\_T3-2\18C-02010\_M09\_octanol\_pH-metric high logP.t3r**

Experiment start time: **3/2/2018 10:00:20 PM**  
 Analyst: **Pion**  
 Instrument ID: **T312060**

## Graphs

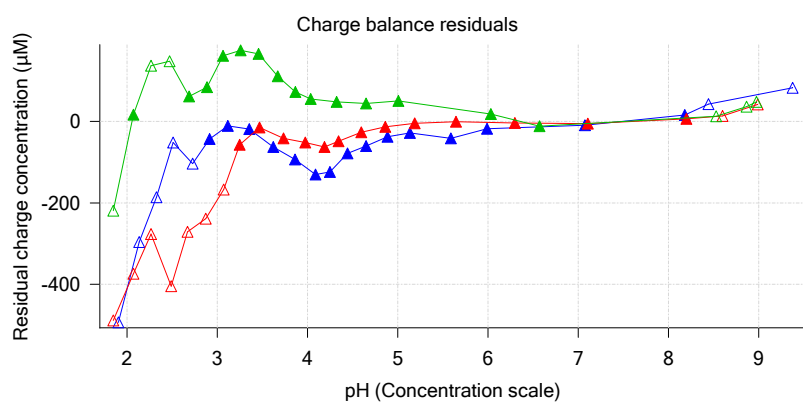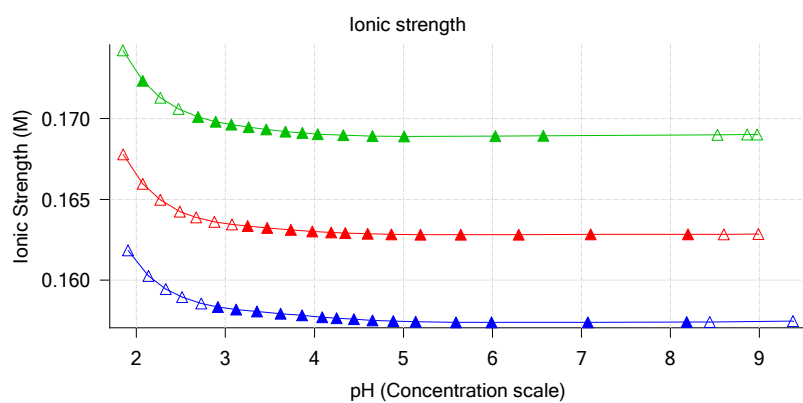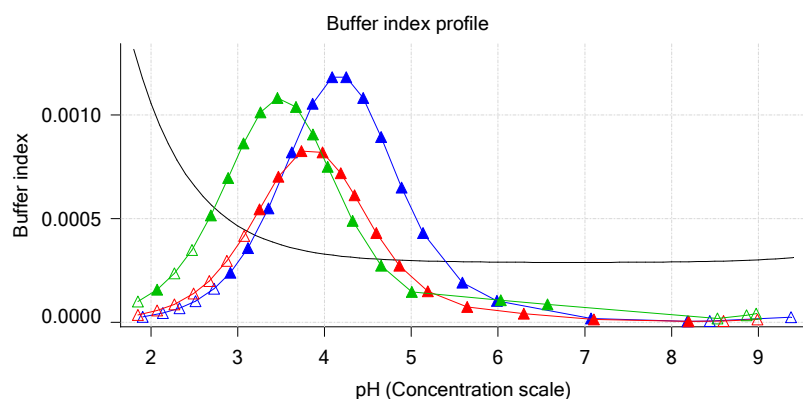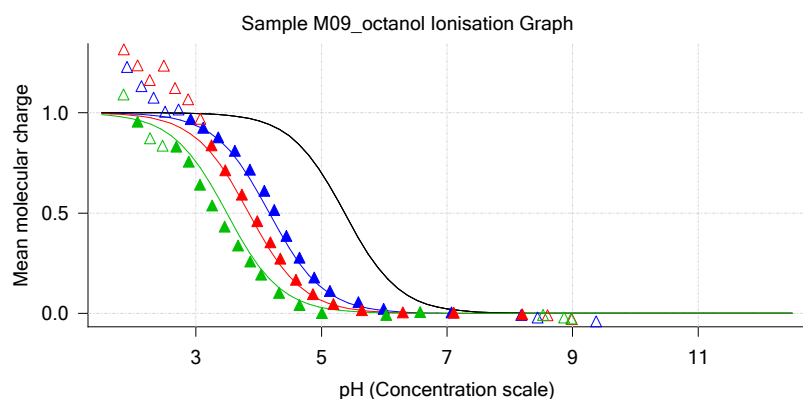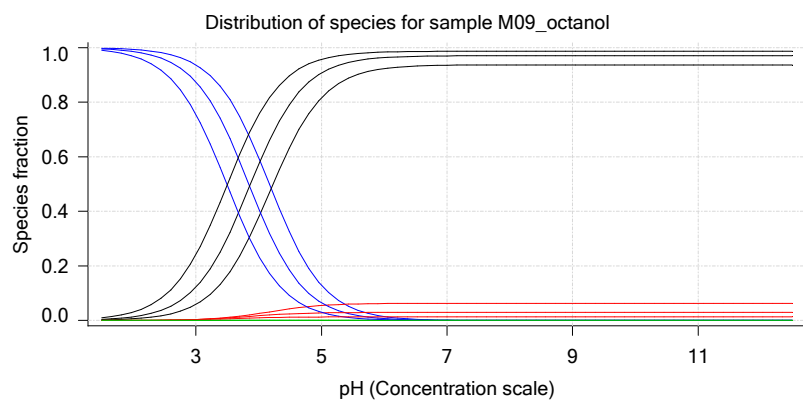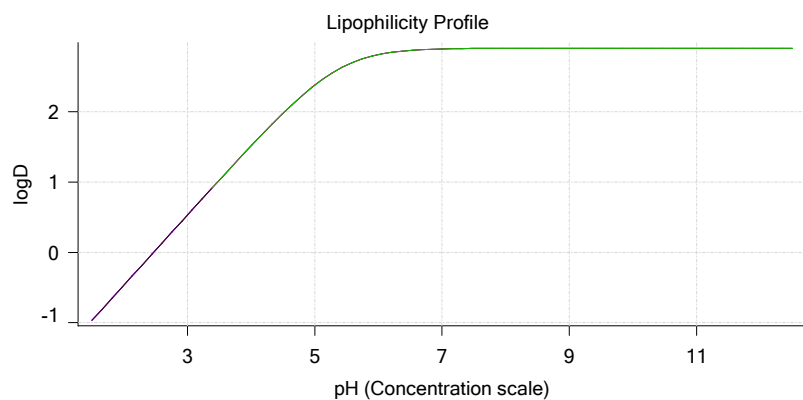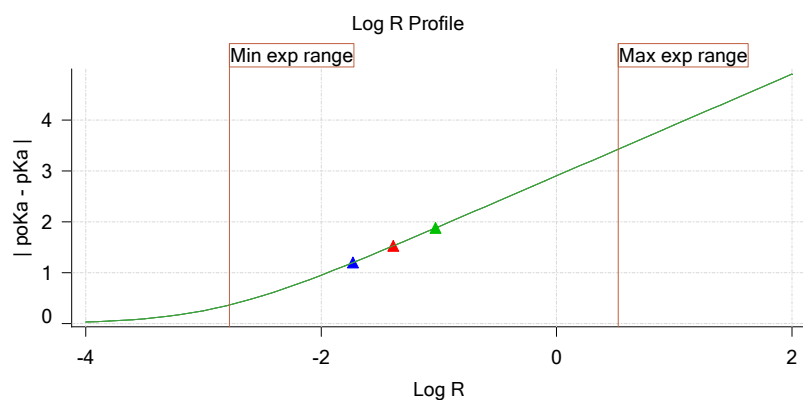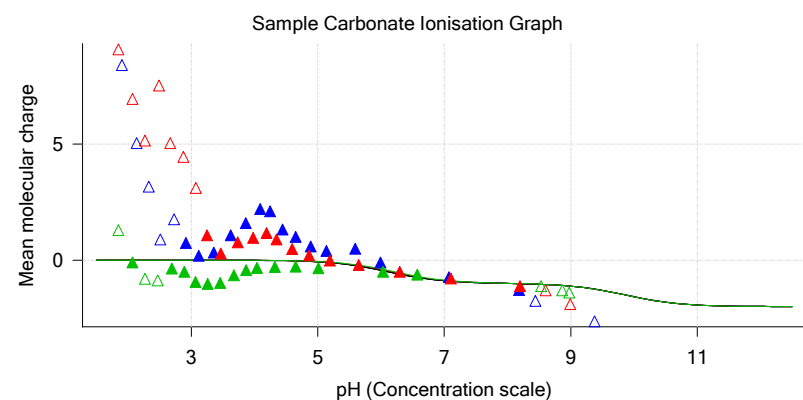

Sample name: **M09\_octanol**  
 Assay name: **pH-metric high logP**  
 Assay ID: **18C-02010**  
 Filename: **C:\Sirius\_T3\Mehtap\20180302\_exp29\_logP\_T3-2\18C-02010\_M09\_octanol\_pH-metric high logP.t3r**

Experiment start time: **3/2/2018 10:00:20 PM**  
 Analyst: **Pion**  
 Instrument ID: **T312060**

## Graphs (continued)

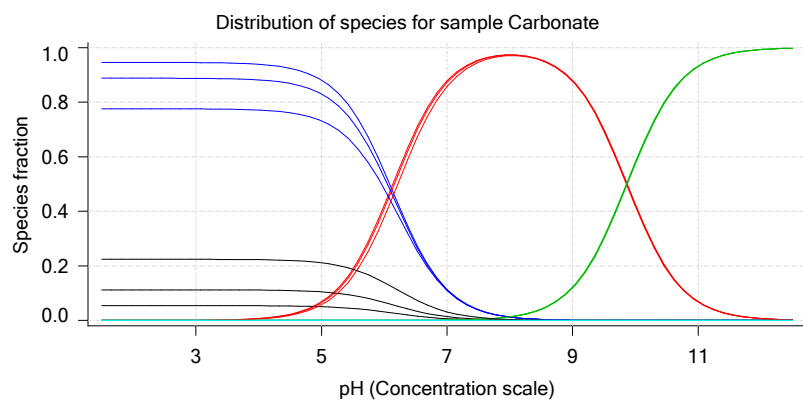

Sample name: **M09\_octanol**  
 Assay name: **pH-metric high logP**  
 Assay ID: **18C-02010**  
 Filename: **C:\Sirius\_T3\Mehtap\20180302\_exp29\_logP\_T3-2\18C-02010\_M09\_octanol\_pH-metric high logP.t3r**

Experiment start time: **3/2/2018 10:00:20 PM**  
 Analyst: **Pion**  
 Instrument ID: **T312060**

## pH-metric high logP Titration 1 of 3 18C-02010 Points 1 to 22

### Overall results

RMSD 0.413  
 Average ionic strength 0.158 M  
 Average temperature 24.9°C  
 Partition ratio 0.0186 : 1  
 Analyte concentration range 1902.7 µM to 1959.6 µM  
 Total points considered 15 of 22

### Warnings and errors

Errors None  
 Warnings None

### Four-Plus parameters

 Alpha 0.111 3/2/2018 10:00:20 PM C:\Sirius\_T3\HCl18C02.t3r  
 S 0.9988 3/2/2018 10:00:20 PM C:\Sirius\_T3\HCl18C02.t3r  
 jH 1.0 3/2/2018 10:00:20 PM C:\Sirius\_T3\HCl18C02.t3r  
 jOH -0.8 3/2/2018 10:00:20 PM C:\Sirius\_T3\HCl18C02.t3r

### Titrants

 0.50 M HCl 0.999058 3/2/2018 10:00:20 PM C:\Sirius\_T3\HCl18C02.t3r  
 0.50 M KOH 0.999845 3/2/2018 10:00:20 PM C:\Sirius\_T3\KOH18B27.t3r

### Sample

 M09\_octanol concentration factor 1.064  
 M09\_octanol stoichiometry 1.000  
 Chloride stoichiometry 1.000  
 Base pKa 1 5.37  
 logP (XH +) 0.48  
 logP (neutral X) 2.84

### Sample graphs

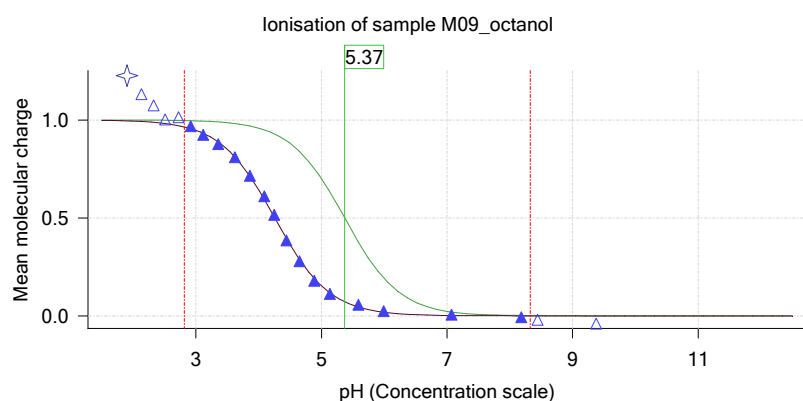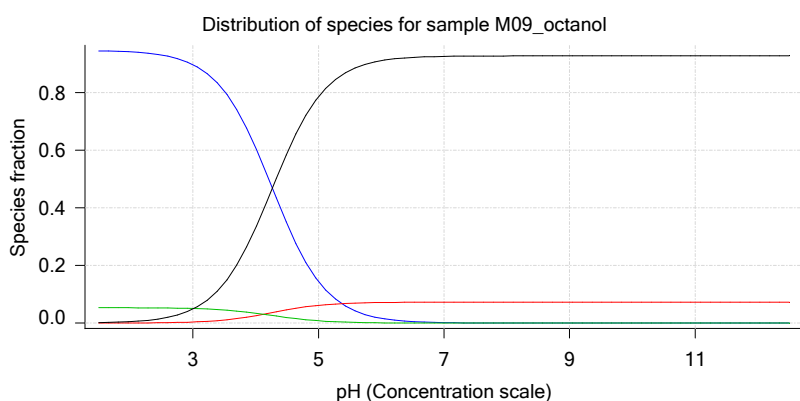

Sample name: **M09\_octanol**  
 Assay name: **pH-metric high logP**  
 Assay ID: **18C-02010**  
 Filename: **C:\Sirius\_T3\Mehtap\20180302\_exp29\_logP\_T3-2\18C-02010\_M09\_octanol\_pH-metric high logP.t3r**

Experiment start time: **3/2/2018 10:00:20 PM**  
 Analyst: **Pion**  
 Instrument ID: **T312060**

## Sample graphs (continued)

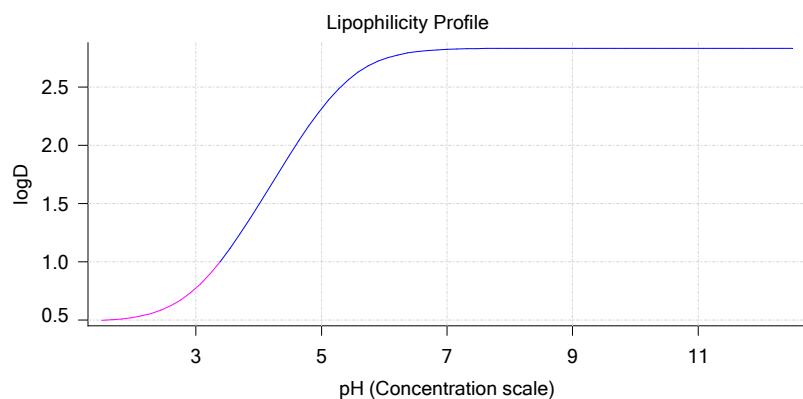

## Sample logD and percent species

| pH     | M09_octanol<br>logD | M09_octanol<br>M09_octanolH | M09_octanol<br>M09_octanolH | M09_octanol<br>M09_octanolH* | M09_octanol<br>M09_octanol* | Comment    |
|--------|---------------------|-----------------------------|-----------------------------|------------------------------|-----------------------------|------------|
| 1.000  | 0.49                | 94.58 %                     | 0.00 %                      | 5.36 %                       | 0.05 %                      | Stomach pH |
| 1.200  | 0.49                | 94.55 %                     | 0.01 %                      | 5.36 %                       | 0.08 %                      |            |
| 2.000  | 0.52                | 94.11 %                     | 0.04 %                      | 5.34 %                       | 0.51 %                      |            |
| 3.000  | 0.77                | 89.67 %                     | 0.38 %                      | 5.08 %                       | 4.86 %                      |            |
| 4.000  | 1.49                | 60.91 %                     | 2.60 %                      | 3.45 %                       | 33.04 %                     |            |
| 5.000  | 2.32                | 14.48 %                     | 6.17 %                      | 0.82 %                       | 78.53 %                     | Blood pH   |
| 6.000  | 2.74                | 1.68 %                      | 7.16 %                      | 0.10 %                       | 91.07 %                     |            |
| 6.500  | 2.80                | 0.54 %                      | 7.25 %                      | 0.03 %                       | 92.18 %                     |            |
| 7.000  | 2.83                | 0.17 %                      | 7.28 %                      | 0.01 %                       | 92.54 %                     |            |
| 7.400  | 2.83                | 0.07 %                      | 7.28 %                      | 0.00 %                       | 92.64 %                     |            |
| 8.000  | 2.83                | 0.02 %                      | 7.29 %                      | 0.00 %                       | 92.69 %                     |            |
| 9.000  | 2.83                | 0.00 %                      | 7.29 %                      | 0.00 %                       | 92.71 %                     |            |
| 10.000 | 2.84                | 0.00 %                      | 7.29 %                      | 0.00 %                       | 92.71 %                     |            |
| 11.000 | 2.84                | 0.00 %                      | 7.29 %                      | 0.00 %                       | 92.71 %                     |            |
| 12.000 | 2.84                | 0.00 %                      | 7.29 %                      | 0.00 %                       | 92.71 %                     |            |

## Carbonate and acidity

Carbonate 0.059 mM  
 Acidity error -0.831 mM

## Other graphs

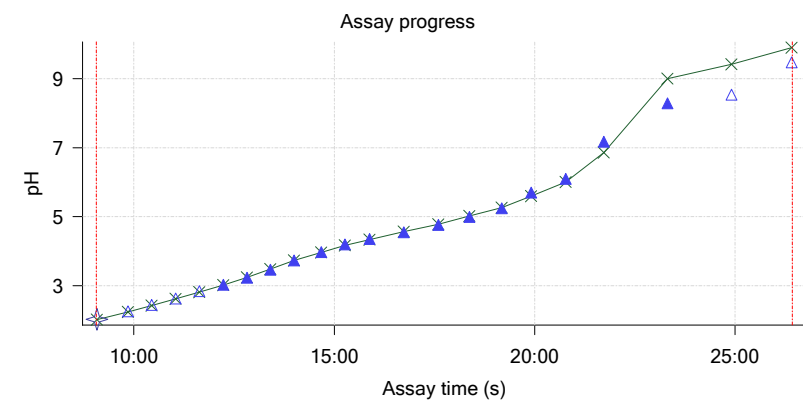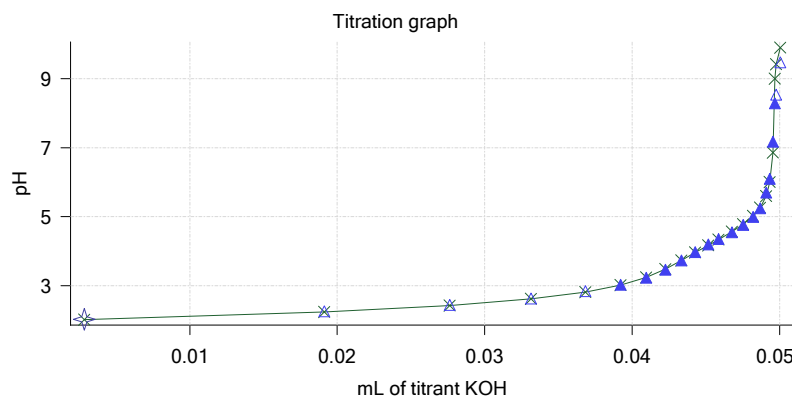

Sample name: **M09\_octanol**  
 Assay name: **pH-metric high logP**  
 Assay ID: **18C-02010**  
 Filename: **C:\Sirius\_T3\Mehtap\20180302\_exp29\_logP\_T3-2\18C-02010\_M09\_octanol\_pH-metric high logP.t3r**

Experiment start time: **3/2/2018 10:00:20 PM**  
 Analyst: **Pion**  
 Instrument ID: **T312060**

## Other graphs (continued)

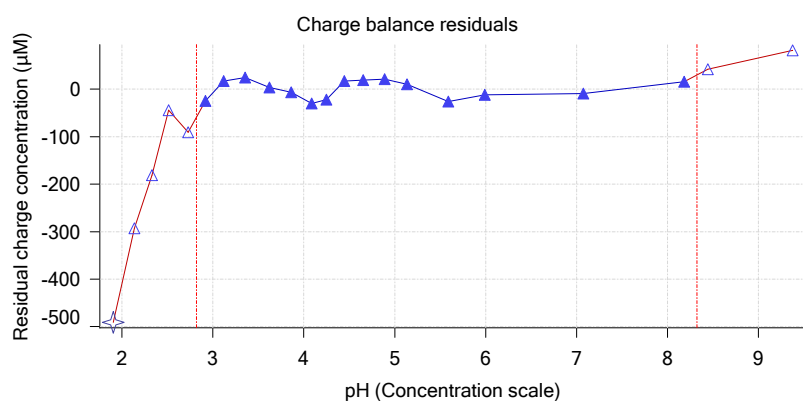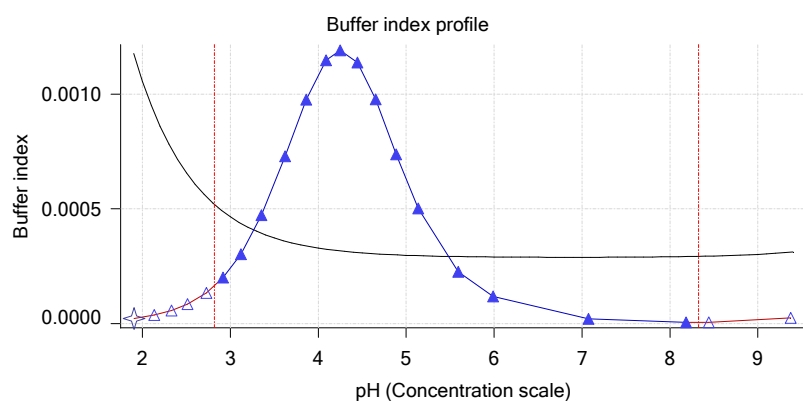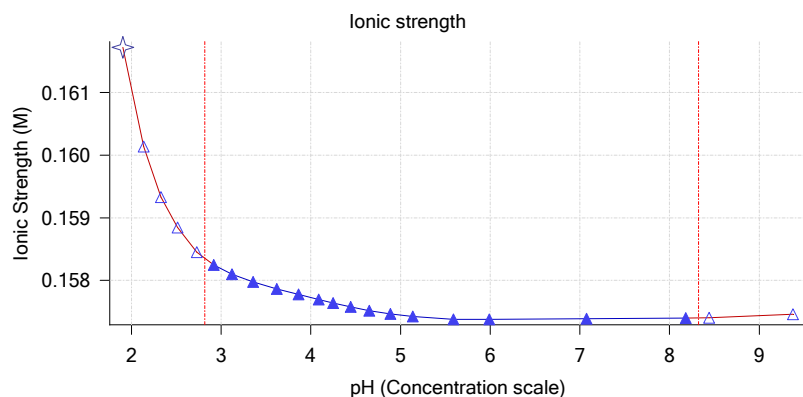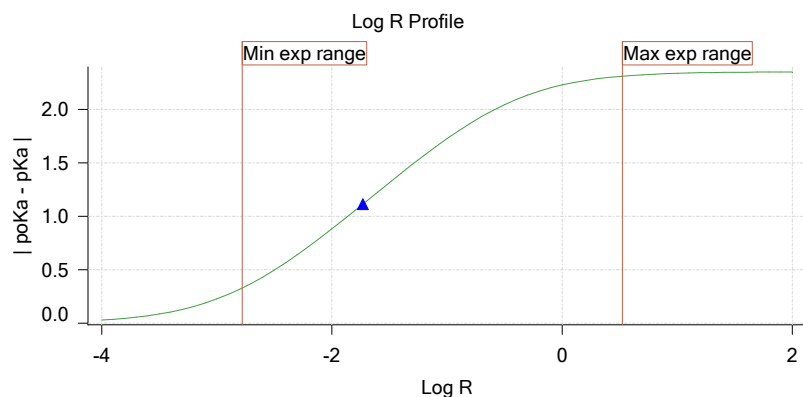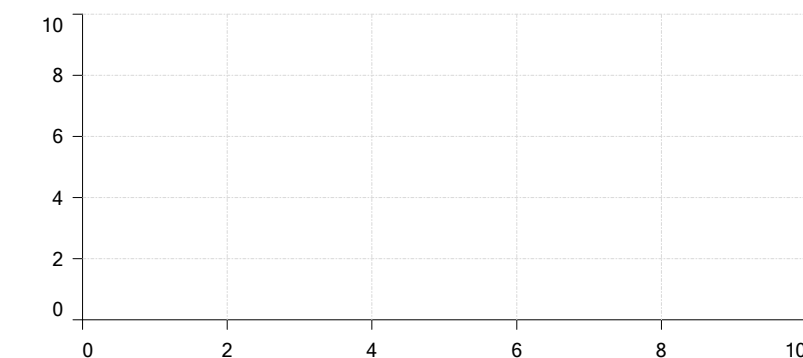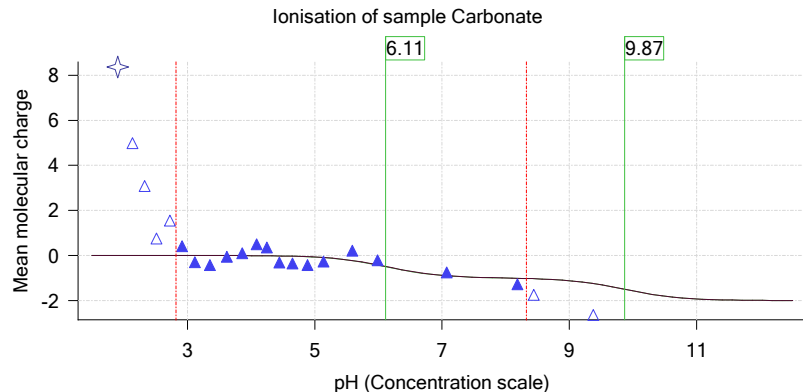

Sample name: **M09\_octanol**  
 Assay name: **pH-metric high logP**  
 Assay ID: **18C-02010**  
 Filename: **C:\Sirius\_T3\Mehtap\20180302\_exp29\_logP\_T3-2\18C-02010\_M09\_octanol\_pH-metric high logP.t3r**

Experiment start time: **3/2/2018 10:00:20 PM**  
 Analyst: **Pion**  
 Instrument ID: **T312060**

## pH-metric high logP Titration 2 of 3 18C-02010 Points 23 to 44

### Overall results

RMSD 0.195  
 Average ionic strength 0.163 M  
 Average temperature 25.0°C  
 Partition ratio 0.0409 : 1  
 Analyte concentration range 1744.4 µM to 1798.6 µM  
 Total points considered 13 of 22

### Warnings and errors

Errors None  
 Warnings None

### Four-Plus parameters

Alpha 0.111 3/2/2018 10:00:20 PM C:\Sirius\_T3\HCl18C02.t3r  
 S 0.9988 3/2/2018 10:00:20 PM C:\Sirius\_T3\HCl18C02.t3r  
 jH 1.0 3/2/2018 10:00:20 PM C:\Sirius\_T3\HCl18C02.t3r  
 jOH -0.8 3/2/2018 10:00:20 PM C:\Sirius\_T3\HCl18C02.t3r

### Titrants

0.50 M HCl 0.999058 3/2/2018 10:00:20 PM C:\Sirius\_T3\HCl18C02.t3r  
 0.50 M KOH 0.999845 3/2/2018 10:00:20 PM C:\Sirius\_T3\KOH18B27.t3r

### Sample

M09\_octanol concentration factor 0.800  
 M09\_octanol stoichiometry 1.000  
 Chloride stoichiometry 1.000  
 Base pKa 1 5.37  
 logP (XH +) 0.84  
 logP (neutral X) 2.95

### Sample graphs

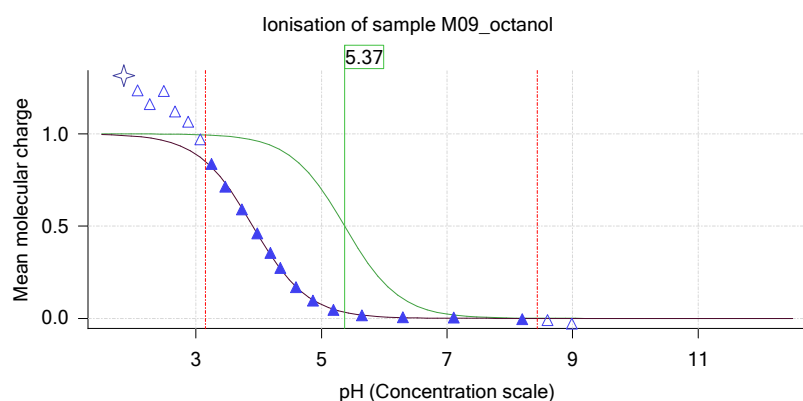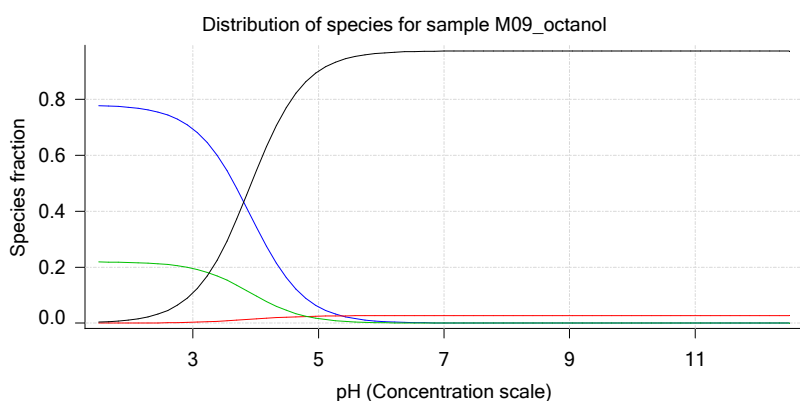

Sample name: **M09\_octanol**  
Assay name: **pH-metric high logP**  
Assay ID: **18C-02010**  
Filename: **C:\Sirius\_T3\Mehtap\20180302\_exp29\_logP\_T3-2\18C-02010\_M09\_octanol\_pH-metric high logP.t3r**

Experiment start time: **3/2/2018 10:00:20 PM**  
Analyst: **Pion**  
Instrument ID: **T312060**

## Sample graphs (continued)

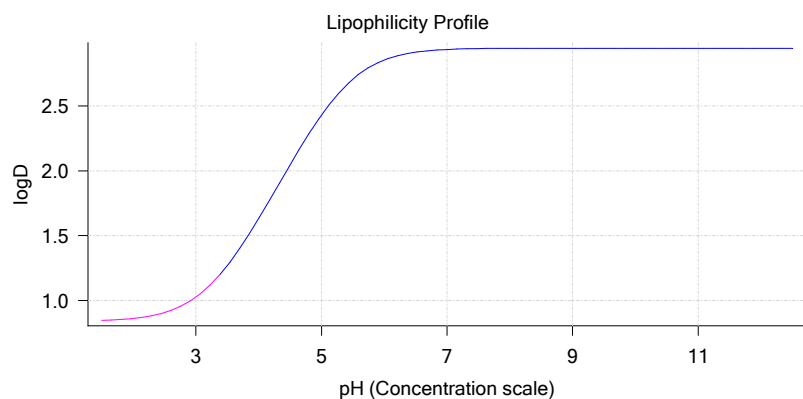

## Sample logD and percent species

| pH     | M09_octanol<br>logD | M09_octanol<br>M09_octanolH | M09_octanol<br>M09_octanolH | M09_octanol<br>M09_octanolH* | M09_octanol<br>M09_octanol* | Comment    |
|--------|---------------------|-----------------------------|-----------------------------|------------------------------|-----------------------------|------------|
| 1.000  | 0.84                | 77.94 %                     | 0.00 %                      | 21.93 %                      | 0.12 %                      |            |
| 1.200  | 0.84                | 77.89 %                     | 0.01 %                      | 21.92 %                      | 0.19 %                      | Stomach pH |
| 2.000  | 0.86                | 77.09 %                     | 0.03 %                      | 21.69 %                      | 1.19 %                      |            |
| 3.000  | 1.03                | 69.45 %                     | 0.30 %                      | 19.54 %                      | 10.72 %                     |            |
| 4.000  | 1.63                | 34.88 %                     | 1.49 %                      | 9.81 %                       | 53.82 %                     |            |
| 5.000  | 2.43                | 5.83 %                      | 2.49 %                      | 1.64 %                       | 90.04 %                     |            |
| 6.000  | 2.86                | 0.63 %                      | 2.67 %                      | 0.18 %                       | 96.53 %                     |            |
| 6.500  | 2.92                | 0.20 %                      | 2.68 %                      | 0.06 %                       | 97.06 %                     |            |
| 7.000  | 2.94                | 0.06 %                      | 2.69 %                      | 0.02 %                       | 97.23 %                     | Blood pH   |
| 7.400  | 2.94                | 0.03 %                      | 2.69 %                      | 0.01 %                       | 97.28 %                     |            |
| 8.000  | 2.95                | 0.01 %                      | 2.69 %                      | 0.00 %                       | 97.30 %                     |            |
| 9.000  | 2.95                | 0.00 %                      | 2.69 %                      | 0.00 %                       | 97.31 %                     |            |
| 10.000 | 2.95                | 0.00 %                      | 2.69 %                      | 0.00 %                       | 97.31 %                     |            |
| 11.000 | 2.95                | 0.00 %                      | 2.69 %                      | 0.00 %                       | 97.31 %                     |            |
| 12.000 | 2.95                | 0.00 %                      | 2.69 %                      | 0.00 %                       | 97.31 %                     |            |

## Carbonate and acidity

Carbonate 0.054 mM  
Acidity error -0.436 mM

## Other graphs

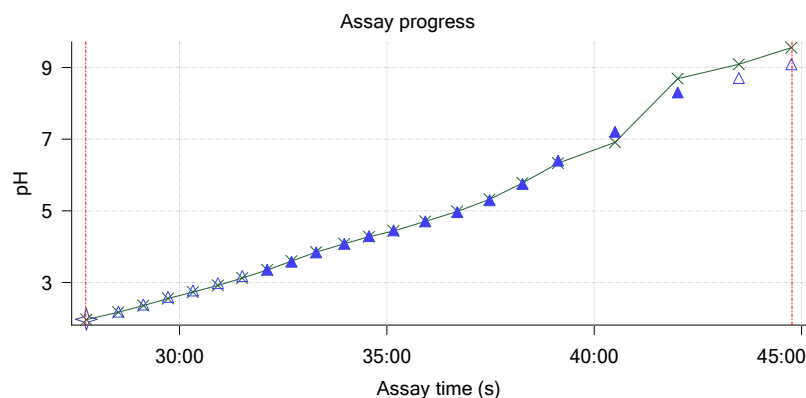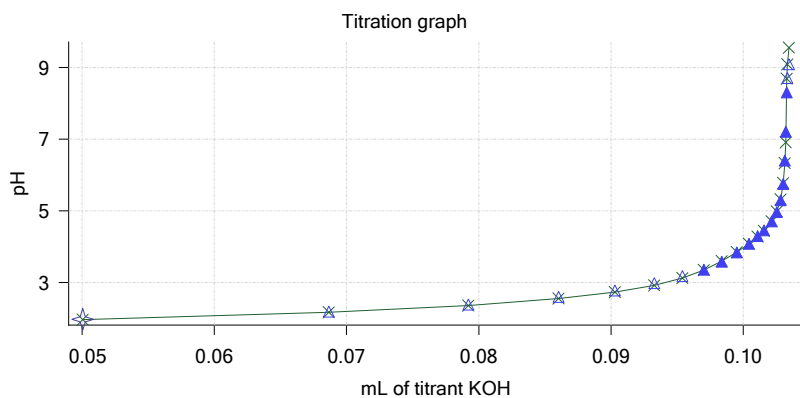



Sample name: **M09\_octanol**  
 Assay name: **pH-metric high logP**  
 Assay ID: **18C-02010**  
 Filename: **C:\Sirius\_T3\Mehtap\20180302\_exp29\_logP\_T3-2\18C-02010\_M09\_octanol\_pH-metric high logP.t3r**

Experiment start time: **3/2/2018 10:00:20 PM**  
 Analyst: **Pion**  
 Instrument ID: **T312060**

## Other graphs (continued)

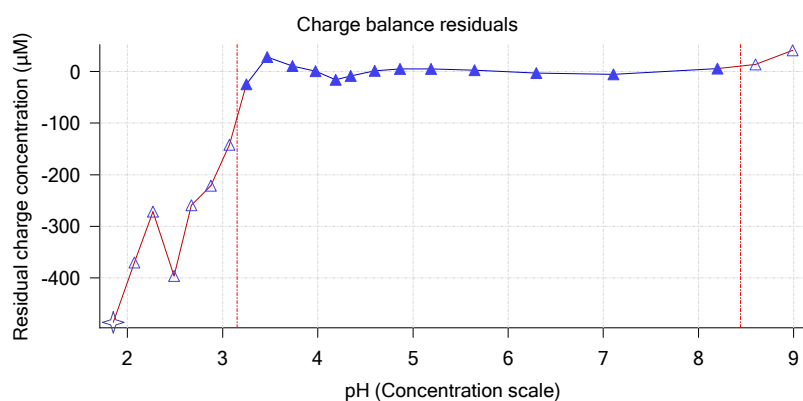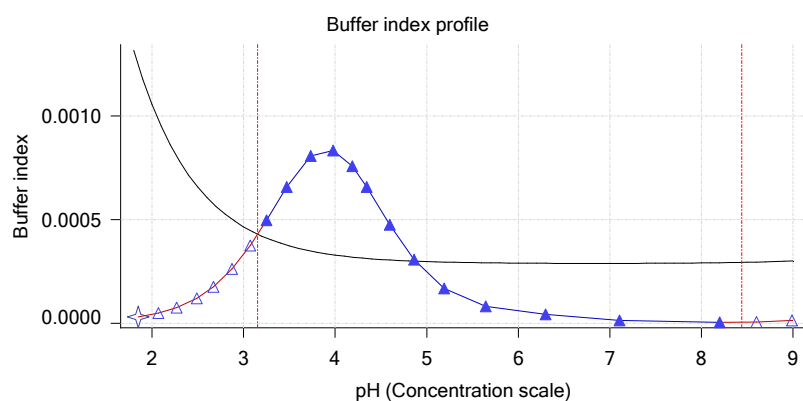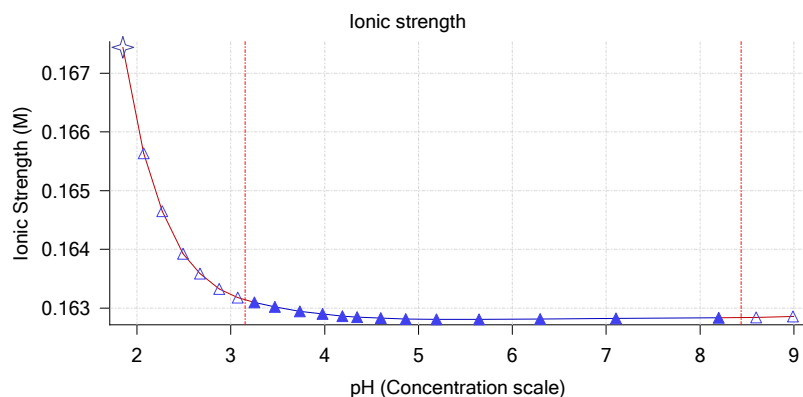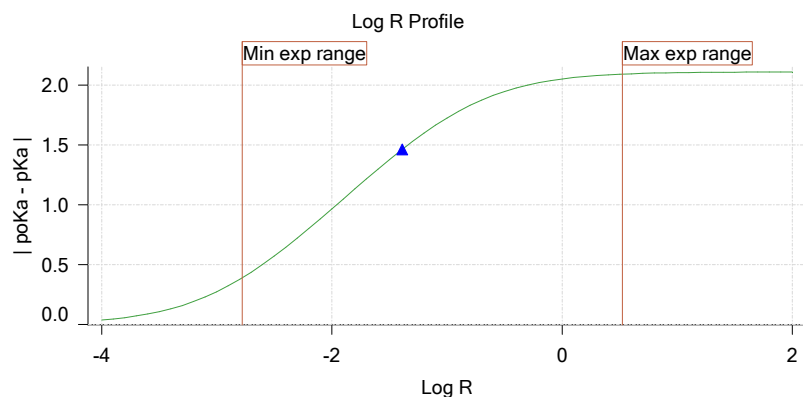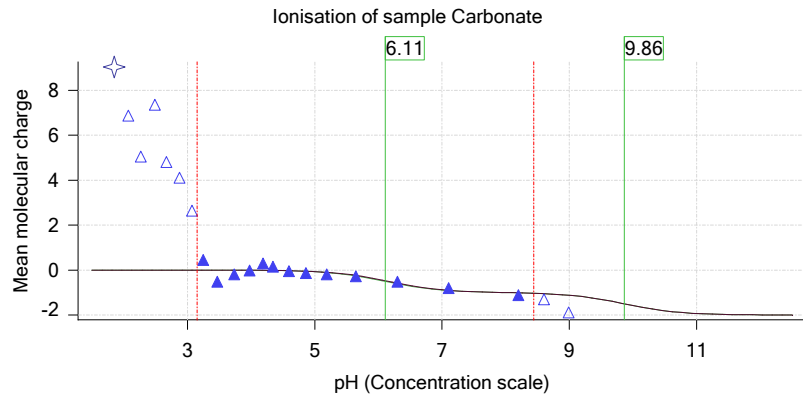

Sample name: **M09\_octanol**  
 Assay name: **pH-metric high logP**  
 Assay ID: **18C-02010**  
 Filename: **C:\Sirius\_T3\Mehtap\20180302\_exp29\_logP\_T3-2\18C-02010\_M09\_octanol\_pH-metric high logP.t3r**

Experiment start time: **3/2/2018 10:00:20 PM**  
 Analyst: **Pion**  
 Instrument ID: **T312060**

pH-metric high logP Titration 3 of 3 18C-02010 Points 45 to 64

## Overall results

RMSD 0.092  
 Average ionic strength 0.169 M  
 Average temperature 25.0°C  
 Partition ratio 0.0935 : 1  
 Analyte concentration range 1555.0 µM to 1601.8 µM  
 Total points considered 14 of 20

## Warnings and errors

Errors None  
 Warnings None

## Four-Plus parameters

Alpha 0.111 3/2/2018 10:00:20 PM C:\Sirius\_T3\HCl18C02.t3r  
 S 0.9988 3/2/2018 10:00:20 PM C:\Sirius\_T3\HCl18C02.t3r  
 jH 1.0 3/2/2018 10:00:20 PM C:\Sirius\_T3\HCl18C02.t3r  
 jOH -0.8 3/2/2018 10:00:20 PM C:\Sirius\_T3\HCl18C02.t3r

## Titrants

0.50 M HCl 0.999058 3/2/2018 10:00:20 PM C:\Sirius\_T3\HCl18C02.t3r  
 0.50 M KOH 0.999845 3/2/2018 10:00:20 PM C:\Sirius\_T3\KOH18B27.t3r

## Sample

M09\_octanol concentration factor 1.103  
 M09\_octanol stoichiometry 1.000  
 Chloride stoichiometry 1.000  
 Base pKa 1 5.37  
 logP (XH +) 0.88  
 logP (neutral X) 3.27

## Sample graphs

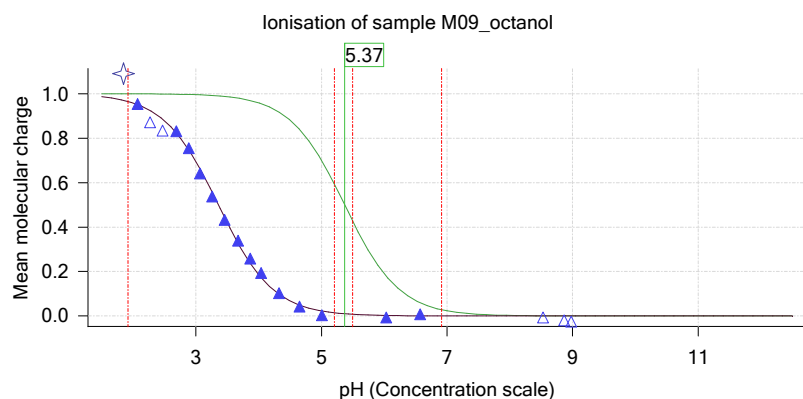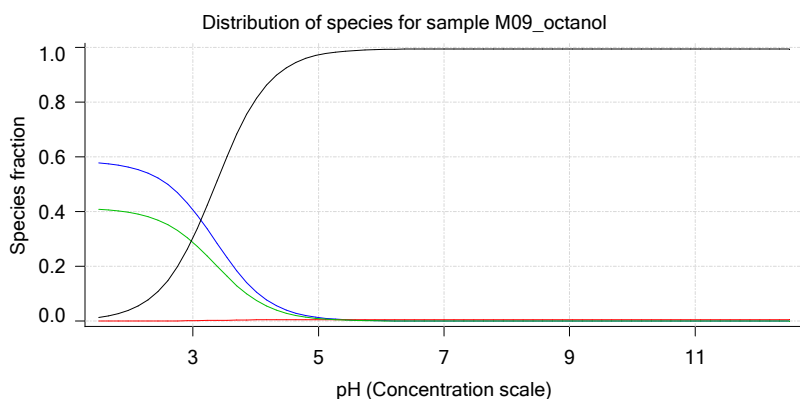

Sample name: **M09\_octanol**  
Assay name: **pH-metric high logP**  
Assay ID: **18C-02010**  
Filename: **C:\Sirius\_T3\Mehtap\20180302\_exp29\_logP\_T3-2\18C-02010\_M09\_octanol\_pH-metric high logP.t3r**

Experiment start time: **3/2/2018 10:00:20 PM**  
Analyst: **Pion**  
Instrument ID: **T312060**

## Sample graphs (continued)

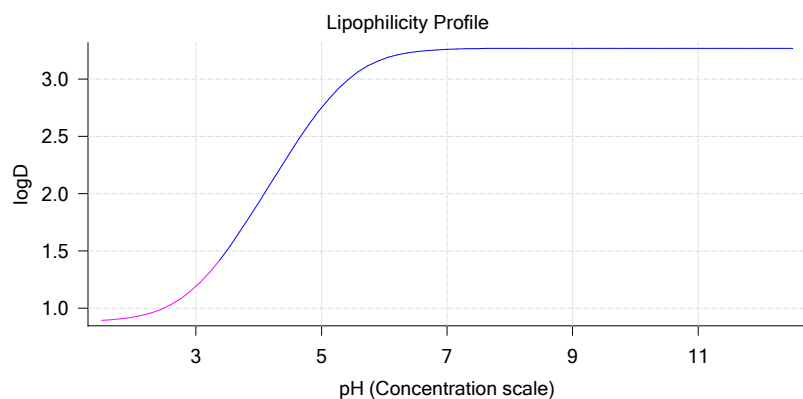

## Sample logD and percent species

| pH     | M09_octanol<br>logD | M09_octanol<br>M09_octanolH | M09_octanol<br>M09_octanolH | M09_octanol<br>M09_octanolH* | M09_octanol<br>M09_octanol* | Comment    |
|--------|---------------------|-----------------------------|-----------------------------|------------------------------|-----------------------------|------------|
| 1.000  | 0.88                | 58.36 %                     | 0.00 %                      | 41.21 %                      | 0.43 %                      | Stomach pH |
| 1.200  | 0.89                | 58.21 %                     | 0.00 %                      | 41.10 %                      | 0.69 %                      |            |
| 2.000  | 0.92                | 56.15 %                     | 0.02 %                      | 39.65 %                      | 4.17 %                      |            |
| 3.000  | 1.19                | 40.76 %                     | 0.17 %                      | 28.78 %                      | 30.28 %                     |            |
| 4.000  | 1.92                | 10.89 %                     | 0.46 %                      | 7.69 %                       | 80.95 %                     |            |
| 5.000  | 2.75                | 1.31 %                      | 0.56 %                      | 0.92 %                       | 97.21 %                     | Blood pH   |
| 6.000  | 3.18                | 0.13 %                      | 0.57 %                      | 0.09 %                       | 99.20 %                     |            |
| 6.500  | 3.24                | 0.04 %                      | 0.57 %                      | 0.03 %                       | 99.36 %                     |            |
| 7.000  | 3.26                | 0.01 %                      | 0.57 %                      | 0.01 %                       | 99.41 %                     |            |
| 7.400  | 3.27                | 0.01 %                      | 0.57 %                      | 0.00 %                       | 99.42 %                     |            |
| 8.000  | 3.27                | 0.00 %                      | 0.57 %                      | 0.00 %                       | 99.43 %                     |            |
| 9.000  | 3.27                | 0.00 %                      | 0.57 %                      | 0.00 %                       | 99.43 %                     |            |
| 10.000 | 3.27                | 0.00 %                      | 0.57 %                      | 0.00 %                       | 99.43 %                     |            |
| 11.000 | 3.27                | 0.00 %                      | 0.57 %                      | 0.00 %                       | 99.43 %                     |            |
| 12.000 | 3.27                | 0.00 %                      | 0.57 %                      | 0.00 %                       | 99.43 %                     |            |

## Carbonate and acidity

Carbonate 0.170 mM  
Acidity error -0.977 mM

## Other graphs

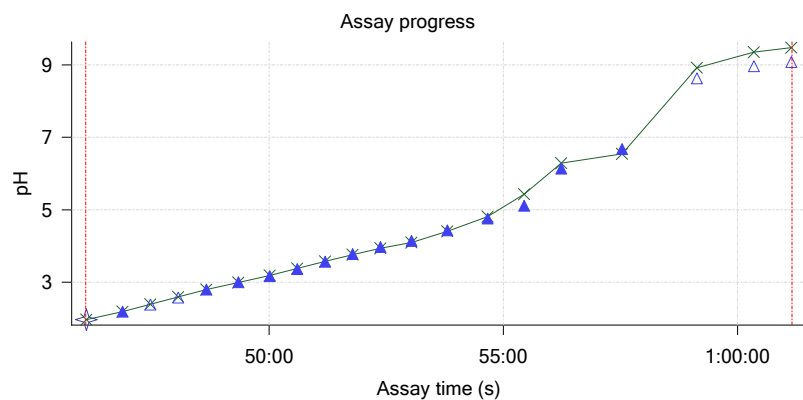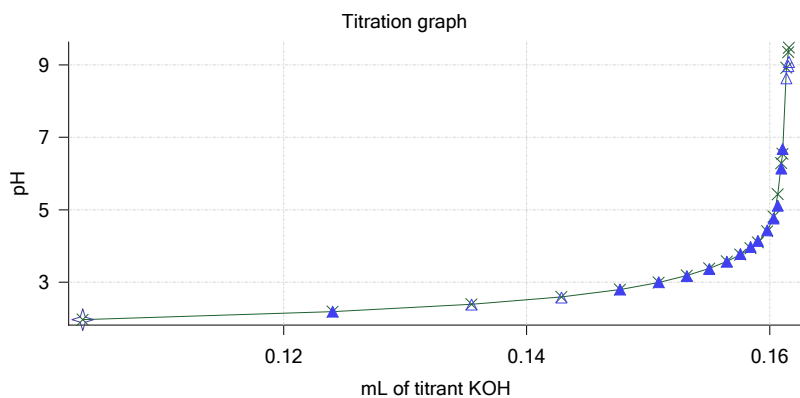

Sample name: **M09\_octanol**  
 Assay name: **pH-metric high logP**  
 Assay ID: **18C-02010**  
 Filename: **C:\Sirius\_T3\Mehtap\20180302\_exp29\_logP\_T3-2\18C-02010\_M09\_octanol\_pH-metric high logP.t3r**

Experiment start time: **3/2/2018 10:00:20 PM**  
 Analyst: **Pion**  
 Instrument ID: **T312060**

## Other graphs (continued)

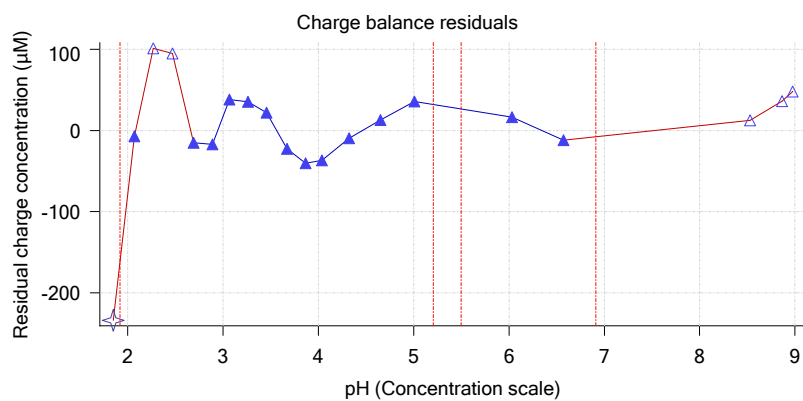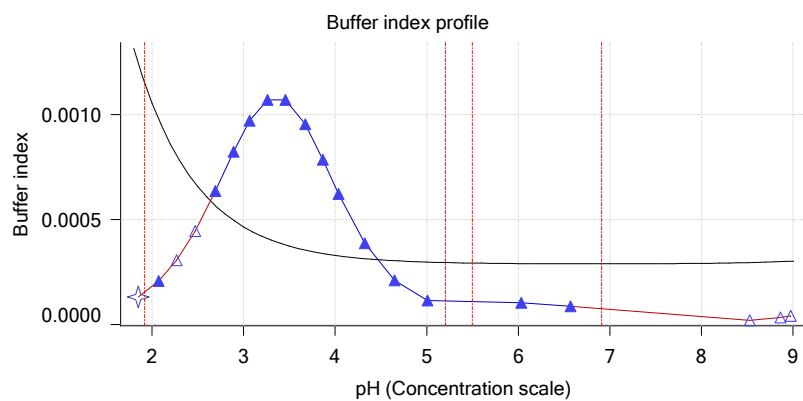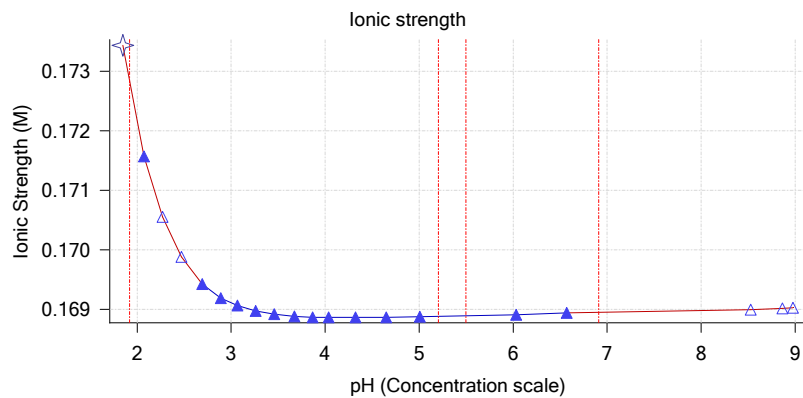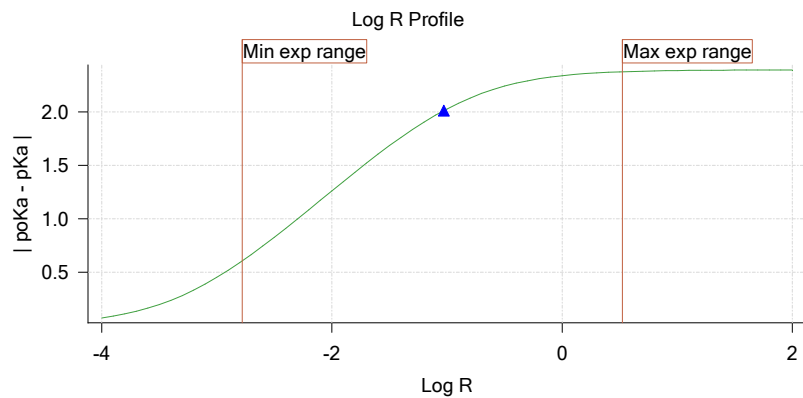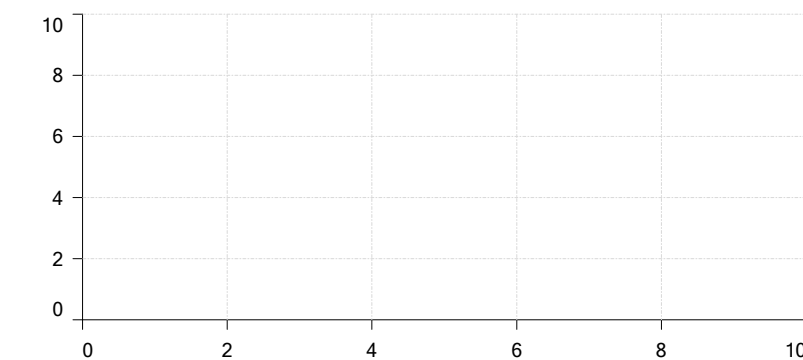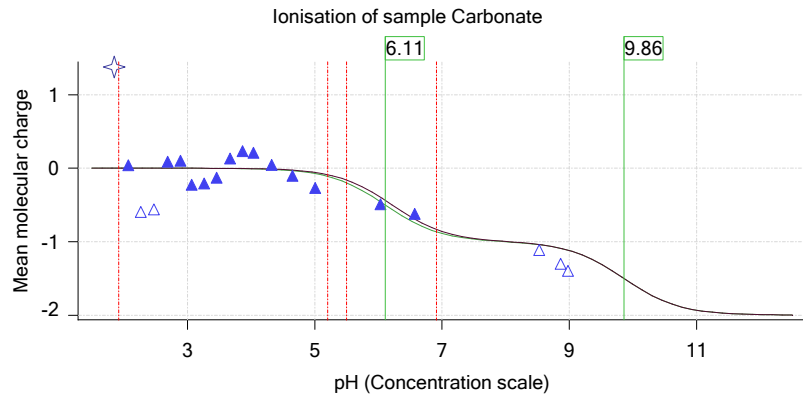

Sample name: **M09\_octanol** Experiment start time: **3/2/2018 10:00:20 PM**  
 Assay name: **pH-metric high logP** Analyst: **Pion**  
 Assay ID: **18C-02010** Instrument ID: **T312060**  
 Filename: **C:\Sirius\_T3\Mehtap\20180302\_exp29\_logP\_T3-2\18C-02010\_M09\_octanol\_pH-metric high logP.t3r**

## Assay Model

| Settings                          | Value        | Date/Time changed    | Imported from           |
|-----------------------------------|--------------|----------------------|-------------------------|
| Sample name                       | M09_octanol  | 2/27/2018 4:56:17 PM | User entered value      |
| Sample by                         | Weight       |                      | Default value           |
| Sample weight                     | 0.000890 g   | 3/2/2018 5:08:29 PM  | User entered value      |
| Formula weight                    | 287.74 g/mol | 2/27/2018 4:45:45 PM | User entered value      |
| Solubility                        | Unknown      |                      | Default value           |
| Molecular weight                  | 251.28       | 2/27/2018 4:45:45 PM | User entered value      |
| Individual pKa ionic environments | No           |                      | Default value           |
| Number of pKas                    | 1            | 2/27/2018 4:45:45 PM | User entered value      |
| Sample is a                       | Base         | 2/27/2018 4:45:45 PM | User entered value      |
| pKa 1                             | 5.37         | 2/27/2018 4:45:45 PM | User entered value      |
| logp (XH +)                       | 0.76         | 3/2/2018 3:27:23 PM  | User entered value      |
| logP (neutral X)                  | 3.27         | 3/2/2018 3:27:17 PM  | User entered value      |
| Stoichiometry                     | 1.00000      |                      | Default value           |
| Aprotic counterion name           | Chloride     |                      | From standards.xml file |
| Stoichiometry                     | 1.00         |                      | From standards.xml file |
| Charge per counterion             | -1           |                      | From standards.xml file |

## Events

| Time    | Event             | Water      | Acid       | Base       | Octanol    | pH    | dpH/dt   | pH R-squared | pH SD   | dpH/dt time         |
|---------|-------------------|------------|------------|------------|------------|-------|----------|--------------|---------|---------------------|
| 6:00.1  | Initial pH = 4.31 |            |            |            |            |       |          |              |         |                     |
| 9:04.7  | Data point 1      | 1.50000 mL | 0.04553 mL | 0.00285 mL | 0.03001 mL | 2.026 | -0.01138 | 0.33547      | 0.00097 | 10.0 s              |
| 9:51.0  | Data point 2      | 1.50000 mL | 0.04553 mL | 0.01912 mL | 0.03001 mL | 2.251 | -0.00371 | 0.21517      | 0.00040 | 10.0 s              |
| 10:26.6 | Data point 3      | 1.50000 mL | 0.04553 mL | 0.02763 mL | 0.03001 mL | 2.442 | -0.00300 | 0.28283      | 0.00028 | 10.5 s              |
| 11:02.7 | Data point 4      | 1.50000 mL | 0.04553 mL | 0.03314 mL | 0.03001 mL | 2.623 | -0.00261 | 0.52506      | 0.00018 | 10.0 s              |
| 11:38.3 | Data point 5      | 1.50000 mL | 0.04553 mL | 0.03683 mL | 0.03001 mL | 2.836 | -0.00461 | 0.55068      | 0.00031 | 10.0 s              |
| 12:13.7 | Data point 6      | 1.50000 mL | 0.04553 mL | 0.03923 mL | 0.03001 mL | 3.025 | -0.00570 | 0.58263      | 0.00037 | 10.0 s              |
| 12:49.2 | Data point 7      | 1.50000 mL | 0.04553 mL | 0.04095 mL | 0.03001 mL | 3.227 | -0.00639 | 0.77318      | 0.00036 | 10.0 s              |
| 13:24.6 | Data point 8      | 1.50000 mL | 0.04553 mL | 0.04226 mL | 0.03001 mL | 3.462 | -0.00426 | 0.73568      | 0.00025 | 10.0 s              |
| 14:00.0 | Data point 9      | 1.50000 mL | 0.04553 mL | 0.04334 mL | 0.03001 mL | 3.728 | -0.00671 | 0.78883      | 0.00037 | 10.0 s              |
| 14:40.6 | Data point 10     | 1.50000 mL | 0.04553 mL | 0.04428 mL | 0.03001 mL | 3.968 | -0.01073 | 0.80668      | 0.00059 | 10.0 s              |
| 15:16.1 | Data point 11     | 1.50000 mL | 0.04553 mL | 0.04516 mL | 0.03001 mL | 4.194 | -0.01846 | 0.90114      | 0.00096 | 11.5 s              |
| 15:53.0 | Data point 12     | 1.50000 mL | 0.04553 mL | 0.04586 mL | 0.03001 mL | 4.354 | -0.01589 | 0.68146      | 0.00095 | 10.5 s              |
| 16:44.4 | Data point 13     | 1.50000 mL | 0.04553 mL | 0.04678 mL | 0.03001 mL | 4.549 | -0.01839 | 0.87702      | 0.00097 | 10.5 s              |
| 17:35.9 | Data point 14     | 1.50000 mL | 0.04553 mL | 0.04753 mL | 0.03001 mL | 4.756 | -0.01781 | 0.86166      | 0.00095 | 11.0 s              |
| 18:22.6 | Data point 15     | 1.50000 mL | 0.04553 mL | 0.04821 mL | 0.03001 mL | 4.992 | -0.01766 | 0.92547      | 0.00091 | 12.5 s              |
| 19:10.8 | Data point 16     | 1.50000 mL | 0.04553 mL | 0.04868 mL | 0.03001 mL | 5.240 | -0.01809 | 0.83242      | 0.00098 | 13.5 s              |
| 19:54.9 | Data point 17     | 1.50000 mL | 0.04553 mL | 0.04908 mL | 0.03001 mL | 5.694 | -0.01649 | 0.87889      | 0.00087 | 16.0 s              |
| 20:46.7 | Data point 18     | 1.50000 mL | 0.04553 mL | 0.04934 mL | 0.03001 mL | 6.092 | -0.01930 | 0.92959      | 0.00099 | 21.0 s              |
| 21:43.4 | Data point 19     | 1.50000 mL | 0.04553 mL | 0.04955 mL | 0.03001 mL | 7.176 | -0.04769 | 0.99644      | 0.00236 | Timed out at 59.5 s |
| 23:19.0 | Data point 20     | 1.50000 mL | 0.04553 mL | 0.04967 mL | 0.03001 mL | 8.283 | -0.03268 | 0.96974      | 0.00164 | Timed out at 59.5 s |
| 24:54.6 | Data point 21     | 1.50000 mL | 0.04553 mL | 0.04976 mL | 0.03001 mL | 8.541 | -0.01854 | 0.89905      | 0.00097 | 54.5 s              |
| 26:24.8 | Data point 22     | 1.50000 mL | 0.04553 mL | 0.05005 mL | 0.03001 mL | 9.474 | -0.01874 | 0.97230      | 0.00094 | 21.5 s              |
| 27:45.4 | Data point 23     | 1.50000 mL | 0.09967 mL | 0.05005 mL | 0.07001 mL | 1.973 | -0.00556 | 0.20263      | 0.00061 | 10.0 s              |
| 28:31.7 | Data point 24     | 1.50000 mL | 0.09967 mL | 0.06865 mL | 0.07001 mL | 2.188 | -0.00175 | 0.27969      | 0.00016 | 10.5 s              |
| 29:07.8 | Data point 25     | 1.50000 mL | 0.09967 mL | 0.07921 mL | 0.07001 mL | 2.381 | -0.00137 | 0.05773      | 0.00028 | 10.0 s              |
| 29:43.5 | Data point 26     | 1.50000 mL | 0.09967 mL | 0.08603 mL | 0.07001 mL | 2.600 | -0.00181 | 0.18269      | 0.00021 | 10.5 s              |
| 30:19.5 | Data point 27     | 1.50000 mL | 0.09967 mL | 0.09029 mL | 0.07001 mL | 2.780 | -0.00959 | 0.84691      | 0.00052 | 10.5 s              |
| 30:55.5 | Data point 28     | 1.50000 mL | 0.09967 mL | 0.09327 mL | 0.07001 mL | 2.984 | -0.00603 | 0.12688      | 0.00083 | 10.0 s              |
| 31:31.0 | Data point 29     | 1.50000 mL | 0.09967 mL | 0.09539 mL | 0.07001 mL | 3.180 | -0.00463 | 0.68835      | 0.00028 | 10.5 s              |
| 32:07.0 | Data point 30     | 1.50000 mL | 0.09967 mL | 0.09701 mL | 0.07001 mL | 3.357 | -0.00337 | 0.46236      | 0.00024 | 10.0 s              |
| 32:42.4 | Data point 31     | 1.50000 mL | 0.09967 mL | 0.09838 mL | 0.07001 mL | 3.576 | -0.01194 | 0.46846      | 0.00086 | 10.0 s              |
| 33:17.9 | Data point 32     | 1.50000 mL | 0.09967 mL | 0.09951 mL | 0.07001 mL | 3.840 | -0.01046 | 0.33603      | 0.00089 | 10.0 s              |
| 33:58.5 | Data point 33     | 1.50000 mL | 0.09967 mL | 0.10042 mL | 0.07001 mL | 4.082 | -0.00936 | 0.85406      | 0.00050 | 10.5 s              |
| 34:34.4 | Data point 34     | 1.50000 mL | 0.09967 mL | 0.10108 mL | 0.07001 mL | 4.294 | -0.00407 | 0.09219      | 0.00066 | 10.0 s              |

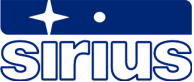

## Assay Events

Sample name: **M09\_octanol**  
Assay name: **pH-metric high logP**  
Assay ID: **18C-02010**  
Filename: **C:\Sirius\_T3\Mehtap\20180302\_exp29\_logP\_T3-2\18C-02010\_M09\_octanol\_pH-metric high logP.t3r**

Experiment start time: **3/2/2018 10:00:20 PM**  
Analyst: **Pion**  
Instrument ID: **T312060**

## Events (continued)

| Time      | Event         | Water      | Acid       | Base       | Octanol    | pH    | dpH/dt   | pH R-squared | pH SD   | dpH/dt time         |
|-----------|---------------|------------|------------|------------|------------|-------|----------|--------------|---------|---------------------|
| 35:09.9   | Data point 35 | 1.50000 mL | 0.09967 mL | 0.10155 mL | 0.07001 mL | 4.450 | -0.01452 | 0.77733      | 0.00081 | 10.0 s              |
| 35:55.6   | Data point 36 | 1.50000 mL | 0.09967 mL | 0.10214 mL | 0.07001 mL | 4.702 | -0.01411 | 0.84297      | 0.00076 | 10.5 s              |
| 36:41.9   | Data point 37 | 1.50000 mL | 0.09967 mL | 0.10254 mL | 0.07001 mL | 4.968 | -0.01431 | 0.68972      | 0.00085 | 11.0 s              |
| 37:28.6   | Data point 38 | 1.50000 mL | 0.09967 mL | 0.10282 mL | 0.07001 mL | 5.294 | -0.01678 | 0.70413      | 0.00099 | 12.0 s              |
| 38:16.4   | Data point 39 | 1.50000 mL | 0.09967 mL | 0.10301 mL | 0.07001 mL | 5.750 | -0.01457 | 0.79249      | 0.00081 | 15.5 s              |
| 39:07.6   | Data point 40 | 1.50000 mL | 0.09967 mL | 0.10313 mL | 0.07001 mL | 6.399 | -0.01829 | 0.88102      | 0.00096 | 47.0 s              |
| 40:30.3   | Data point 41 | 1.50000 mL | 0.09967 mL | 0.10320 mL | 0.07001 mL | 7.207 | -0.05114 | 0.99091      | 0.00254 | Timed out at 59.5 s |
| 42:00.8   | Data point 42 | 1.50000 mL | 0.09967 mL | 0.10327 mL | 0.07001 mL | 8.299 | -0.01875 | 0.88424      | 0.00099 | 58.0 s              |
| 43:29.5   | Data point 43 | 1.50000 mL | 0.09967 mL | 0.10332 mL | 0.07001 mL | 8.699 | -0.01983 | 0.98147      | 0.00099 | 35.0 s              |
| 44:45.3   | Data point 44 | 1.50000 mL | 0.09967 mL | 0.10346 mL | 0.07001 mL | 9.089 | -0.01827 | 0.94147      | 0.00093 | 20.5 s              |
| 46:06.3   | Data point 45 | 1.50000 mL | 0.15753 mL | 0.10346 mL | 0.17001 mL | 1.972 | -0.01076 | 0.86425      | 0.00057 | 10.0 s              |
| 46:52.6   | Data point 46 | 1.50000 mL | 0.15753 mL | 0.12404 mL | 0.17001 mL | 2.189 | -0.00758 | 0.73014      | 0.00044 | 10.0 s              |
| 47:28.3   | Data point 47 | 1.50000 mL | 0.15753 mL | 0.13547 mL | 0.17001 mL | 2.382 | -0.00182 | 0.17529      | 0.00021 | 10.0 s              |
| 48:03.9   | Data point 48 | 1.50000 mL | 0.15753 mL | 0.14285 mL | 0.17001 mL | 2.583 | 0.00231  | 0.53001      | 0.00016 | 10.5 s              |
| 48:39.9   | Data point 49 | 1.50000 mL | 0.15753 mL | 0.14767 mL | 0.17001 mL | 2.800 | 0.01463  | 0.61912      | 0.00092 | 15.5 s              |
| 49:20.9   | Data point 50 | 1.50000 mL | 0.15753 mL | 0.15087 mL | 0.17001 mL | 2.998 | 0.01486  | 0.59518      | 0.00095 | 14.5 s              |
| 50:00.9   | Data point 51 | 1.50000 mL | 0.15753 mL | 0.15320 mL | 0.17001 mL | 3.174 | -0.00236 | 0.06490      | 0.00046 | 10.0 s              |
| 50:36.4   | Data point 52 | 1.50000 mL | 0.15753 mL | 0.15503 mL | 0.17001 mL | 3.369 | -0.00368 | 0.52645      | 0.00025 | 10.0 s              |
| 51:11.8   | Data point 53 | 1.50000 mL | 0.15753 mL | 0.15647 mL | 0.17001 mL | 3.564 | -0.00334 | 0.04831      | 0.00075 | 10.0 s              |
| 51:47.3   | Data point 54 | 1.50000 mL | 0.15753 mL | 0.15760 mL | 0.17001 mL | 3.779 | -0.00287 | 0.06293      | 0.00056 | 10.0 s              |
| 52:22.7   | Data point 55 | 1.50000 mL | 0.15753 mL | 0.15842 mL | 0.17001 mL | 3.972 | 0.01222  | 0.41308      | 0.00094 | 14.5 s              |
| 53:02.6   | Data point 56 | 1.50000 mL | 0.15753 mL | 0.15903 mL | 0.17001 mL | 4.143 | -0.00657 | 0.60274      | 0.00042 | 10.0 s              |
| 53:48.4   | Data point 57 | 1.50000 mL | 0.15753 mL | 0.15981 mL | 0.17001 mL | 4.429 | 0.01474  | 0.60321      | 0.00094 | 16.0 s              |
| 54:40.1   | Data point 58 | 1.50000 mL | 0.15753 mL | 0.16033 mL | 0.17001 mL | 4.755 | 0.01365  | 0.52664      | 0.00093 | 11.0 s              |
| 55:26.8   | Data point 59 | 1.50000 mL | 0.15753 mL | 0.16065 mL | 0.17001 mL | 5.112 | -0.00952 | 0.31084      | 0.00084 | 11.5 s              |
| 56:14.0   | Data point 60 | 1.50000 mL | 0.15753 mL | 0.16096 mL | 0.17001 mL | 6.134 | -0.01828 | 0.87737      | 0.00096 | 42.5 s              |
| 57:32.1   | Data point 61 | 1.50000 mL | 0.15753 mL | 0.16105 mL | 0.17001 mL | 6.674 | -0.03582 | 0.95893      | 0.00181 | Timed out at 59.5 s |
| 59:07.8   | Data point 62 | 1.50000 mL | 0.15753 mL | 0.16138 mL | 0.17001 mL | 8.628 | -0.01937 | 0.92742      | 0.00099 | 32.0 s              |
| 1:00:20.6 | Data point 63 | 1.50000 mL | 0.15753 mL | 0.16152 mL | 0.17001 mL | 8.963 | -0.00684 | 0.12695      | 0.00095 | 17.5 s              |
| 1:01:08.6 | Data point 64 | 1.50000 mL | 0.15753 mL | 0.16159 mL | 0.17001 mL | 9.075 | -0.01927 | 0.95912      | 0.00097 | 15.0 s              |
| 1:01:32.7 | Assay volumes | 1.50000 mL | 0.15753 mL | 0.16159 mL | 0.17001 mL |       |          |              |         |                     |

Sample name: **M09\_octanol**  
 Assay name: **pH-metric high logP**  
 Assay ID: **18C-02010**  
 Filename: **C:\Sirius\_T3\Mehtap\20180302\_exp29\_logP\_T3-2\18C-02010\_M09\_octanol\_pH-metric high logP.t3r**

Experiment start time: **3/2/2018 10:00:20 PM**  
 Analyst: **Pion**  
 Instrument ID: **T312060**

## Assay Settings

| Setting                             | Value              | Original Value | Date/Time changed | Imported from |
|-------------------------------------|--------------------|----------------|-------------------|---------------|
| <b>General Settings</b>             |                    |                |                   |               |
| Analyst name                        | Pion               |                |                   |               |
| <b>Standard Experiment Settings</b> |                    |                |                   |               |
| Number of titrations                | 3                  |                |                   |               |
| Minimum pH                          | 2.000              |                |                   |               |
| Maximum pH                          | 9.000              |                |                   |               |
| pH step between points of           | 0.200              |                |                   |               |
| Minimum titrant addition            | 0.00002 mL         |                |                   |               |
| Maximum titrant addition            | 0.10000 mL         |                |                   |               |
| Argon flow rate                     | 100%               |                |                   |               |
| Start titration using               | Cautious pH adjust |                |                   |               |
| <b>Advanced General Settings</b>    |                    |                |                   |               |
| Detect turbidity using              | None               |                |                   |               |
| Collect turbidity sensor data       | No                 |                |                   |               |
| Collect UV spectra                  | No                 |                |                   |               |
| Stir after titrant addition for     | 5 seconds          |                |                   |               |
| For titrant addition, stir at       | 10%                |                |                   |               |
| <b>Titration Pre-Dose</b>           |                    |                |                   |               |
| Titration pre-dose                  | None               |                |                   |               |
| <b>Assay Medium</b>                 |                    |                |                   |               |
| ISA water volume                    | 1.50 mL            |                |                   |               |
| Water added                         | Automatic          |                |                   |               |
| Partition solvent type              | Octanol            |                |                   |               |
| Partition volume                    | 0.030 mL           |                |                   |               |
| Partition solvent added             | Automatic          |                |                   |               |
| After partition addition, stir for  | 1 seconds          |                |                   |               |
| <b>Sample Sonication</b>            |                    |                |                   |               |
| Sonicate                            | Yes                |                |                   |               |
| Adjust pH for sonication            | No                 |                |                   |               |
| Sonicate for                        | 120 seconds        |                |                   |               |
| After sonication stir for           | 5 seconds          |                |                   |               |
| <b>Sample Dissolution</b>           |                    |                |                   |               |
| Perform a dissolution stage         | Yes                |                |                   |               |
| Adjust and hold pH for dissolution  | To start pH        |                |                   |               |
| Stir to dissolve for                | 120 seconds        |                |                   |               |
| For dissolution, stir at            | 10%                |                |                   |               |
| <b>Carbonate purge</b>              |                    |                |                   |               |
| Perform a carbonate purge           | No                 |                |                   |               |
| <b>Temperature Control</b>          |                    |                |                   |               |
| Wait for temperature                | Yes                |                |                   |               |
| Required start temperature          | 25.0°C             |                |                   |               |
| Acceptable deviation                | 0.5°C              |                |                   |               |
| Time to wait                        | 60 seconds         |                |                   |               |
| Stir speed of                       | 50%                |                |                   |               |
| <b>Titration 1</b>                  |                    |                |                   |               |
| Titrate from                        | Low to high pH     |                |                   |               |
| Adjust to start pH                  | Yes                |                |                   |               |
| After pH adjust stir for            | 30 seconds         |                |                   |               |
| Stir to allow partitioning for      | 15 seconds         |                |                   |               |
| Stirrer speed for partitioning      | 50%                |                |                   |               |
| <b>Titration 2</b>                  |                    |                |                   |               |
| Titrate from                        | Low to high pH     |                |                   |               |
| Add additional water                | 0.00 mL            |                |                   |               |
| Additional partition solvent volume | 0.040 mL           |                |                   |               |
| Additional partition solvent added  | Automatic          |                |                   |               |
| After pH adjust stir for            | 30 seconds         |                |                   |               |
| Stir to allow partitioning for      | 15 seconds         |                |                   |               |
| Stirrer speed for partitioning      | 55%                |                |                   |               |



Sample name: **M09\_octanol** Experiment start time: **3/2/2018 10:00:20 PM**  
 Assay name: **pH-metric high logP** Analyst: **Pion**  
 Assay ID: **18C-02010** Instrument ID: **T312060**  
 Filename: **C:\Sirius\_T3\Mehtap\20180302\_exp29\_logP\_T3-2\18C-02010\_M09\_octanol\_pH-metric high logP.t3r**

## Assay Settings (continued)

| Setting                             | Value          | Original Value | Date/Time changed | Imported from |
|-------------------------------------|----------------|----------------|-------------------|---------------|
| <b>Titration 3</b>                  |                |                |                   |               |
| Titrate from                        | Low to high pH |                |                   |               |
| Add additional water                | 0.00 mL        |                |                   |               |
| Additional partition solvent volume | 0.100 mL       |                |                   |               |
| Additional partition solvent added  | Automatic      |                |                   |               |
| After pH adjust stir for            | 30 seconds     |                |                   |               |
| Stir to allow partitioning for      | 15 seconds     |                |                   |               |
| Stirrer speed for partitioning      | 60%            |                |                   |               |
| <b>Data Point Stability</b>         |                |                |                   |               |
| Stir during data point collection   | No             |                |                   |               |
| Delay before data point collection  | 0 seconds      |                |                   |               |
| Number of points to average         | 20 points      |                |                   |               |
| Time interval between points        | 0.50 seconds   |                |                   |               |
| Required maximum standard deviation | 0.00100 dpH/dt |                |                   |               |
| Stability timeout after             | 60 seconds     |                |                   |               |

## Calibration Settings

| Setting                   | Value  | Date/Time changed    | Imported from             |
|---------------------------|--------|----------------------|---------------------------|
| Four-Plus alpha           | 0.111  | 3/2/2018 10:00:20 PM | C:\Sirius_T3\HCl18C02.t3r |
| Four-Plus S               | 0.9988 | 3/2/2018 10:00:20 PM | C:\Sirius_T3\HCl18C02.t3r |
| Four-Plus jH              | 1.0    | 3/2/2018 10:00:20 PM | C:\Sirius_T3\HCl18C02.t3r |
| Four-Plus jOH             | -0.8   | 3/2/2018 10:00:20 PM | C:\Sirius_T3\HCl18C02.t3r |
| Base concentration factor | 1.000  | 3/2/2018 10:00:20 PM | C:\Sirius_T3\KOH18B27.t3r |
| Acid concentration factor | 0.999  | 3/2/2018 10:00:20 PM | C:\Sirius_T3\HCl18C02.t3r |

## Instrument Settings

| Setting              | Value                      | Batch Id    | Install date           |
|----------------------|----------------------------|-------------|------------------------|
| Instrument owner     | Merck                      |             |                        |
| Instrument ID        | T312060                    |             |                        |
| Instrument type      | T3 Simulator               |             |                        |
| Software version     | 1.1.3.0                    |             |                        |
| Dispenser module     |                            | T3DM1200361 | 3/31/2009 5:24:52 AM   |
| Dispenser 0          | Water                      |             | 3/31/2009 5:25:05 AM   |
| Syringe volume       | 2.5 mL                     |             |                        |
| Firmware version     | 1.2.1(r2)                  |             |                        |
| Titrant              | Water (0.15 M KCl)         | 02-06-2018  | 2/27/2018 10:05:59 AM  |
| Dispenser 2          | Acid                       |             | 3/31/2009 5:25:11 AM   |
| Syringe volume       | 0.5 mL                     |             |                        |
| Firmware version     | 1.2.1(r2)                  |             |                        |
| Titrant              | Acid (0.5 M HCl)           | 02-27-2018  | 2/27/2018 10:27:22 AM  |
| Dispenser 1          | Base                       |             | 3/31/2009 5:25:21 AM   |
| Syringe volume       | 0.5 mL                     |             |                        |
| Firmware version     | 1.2.1(r2)                  |             |                        |
| Titrant              | Base (0.5 M KOH)           | 9/22/2017   | 2/27/2018 10:21:22 AM  |
| Dispenser 5          | Cosolvent                  |             | 3/31/2009 5:26:24 AM   |
| Syringe volume       | 2.5 mL                     |             |                        |
| Firmware version     | 1.2.1(r2)                  |             |                        |
| Distribution valve 5 | Distribution Valve         |             | 3/31/2009 5:28:19 AM   |
| Firmware version     | 1.1.3                      |             |                        |
| Port A               | Methanol (80%, 0.15 M KCl) | 09-26-17    | 2/7/2018 9:42:01 AM    |
| Port B               | Cyclohexane                | 11-01-17    | 2/27/2018 10:37:57 AM  |
| Dispenser 3          | Buffer                     |             | 8/3/2010 5:05:16 AM    |
| Syringe volume       | 0.5 mL                     |             |                        |
| Firmware version     | 1.2.1(r2)                  |             |                        |
| Titrant              | Dodecane                   | 2018/01/31  | 2/28/2018 10:18:04 AM  |
| Dispenser 6          | Octanol                    |             | 10/22/2010 10:52:43 AM |



Sample name: **M09\_octanol** Experiment start time: **3/2/2018 10:00:20 PM**  
 Assay name: **pH-metric high logP** Analyst: **Pion**  
 Assay ID: **18C-02010** Instrument ID: **T312060**  
 Filename: **C:\Sirius\_T3\Mehtap\20180302\_exp29\_logP\_T3-2\18C-02010\_M09\_octanol\_pH-metric high logP.t3r**

## Instrument Settings (continued)

| Setting                                   | Value                      | Batch Id    | Install date           |
|-------------------------------------------|----------------------------|-------------|------------------------|
| Syringe volume                            | 0.5 mL                     |             |                        |
| Firmware version                          | 1.2.1(r2)                  |             |                        |
| Titrant                                   | Octanol                    | 01-31-2018  | 2/27/2018 9:59:35 AM   |
| Titration                                 |                            | T3TM1200161 | 3/31/2009 5:24:17 AM   |
| Horizontal axis firmware version          | 1.17 AI1DI2DO2 Stepper 2   |             |                        |
| Vertical axis firmware version            | 1.17 AI1DI2DO2 Stepper 2   |             |                        |
| Chassis I/O firmware version              | 1.11 AI1DI0DO4 Norgren I/O |             |                        |
| Probe I/O firmware version                | 1.1.1                      |             |                        |
| Electrode                                 | T3 Electrode               | T3E0923     | 1/23/2018 2:01:00 PM   |
| E0 calibration                            | +3.23 mV                   |             | 3/2/2018 10:00:48 PM   |
| Filling solution                          | 3M KCl                     | KCL097      | 3/2/2018 9:43:24 AM    |
| Liquids                                   |                            |             |                        |
| Wash 1                                    | 50% IPA:50% Water          |             | 3/2/2018 9:45:12 AM    |
| Wash 2                                    | 0.5% Triton X-100 in H2O   |             | 3/2/2018 9:45:15 AM    |
| Buffer position 1                         | pH7 Wash                   |             | 3/2/2018 9:45:18 AM    |
| Buffer position 2                         | pH 7                       |             | 3/2/2018 9:45:21 AM    |
| Storage position                          |                            |             | 3/2/2018 9:44:44 AM    |
| Wash water                                | 7.2e+003 mL                | 02-27-2018  | 2/27/2018 9:54:39 AM   |
| Waste                                     | 8.2e+003 mL                |             | 11/28/2017 10:36:29 AM |
| Temperature controller                    |                            |             | 8/5/2010 6:35:13 AM    |
| Turbidity detector                        |                            |             | 3/31/2009 5:24:45 AM   |
| Spectrometer                              |                            | 074811      | 11/23/2010 11:22:28 AM |
| Dip probe                                 |                            | 10196       |                        |
| Wavelength coefficient A0                 | 183.333                    |             |                        |
| Wavelength coefficient A1                 | 2.21568                    |             |                        |
| Wavelength coefficient A2                 | -0.000289308               |             |                        |
| Total lamp lit time                       | 120:41:49                  |             | 11/23/2010 11:22:28 AM |
| Calibrated on                             | 2/27/2018 10:40:38 AM      |             |                        |
| Integration time                          | 40                         |             |                        |
| Scans averaged                            | 10                         |             |                        |
| Autoloader                                |                            | T3AL1200345 | 11/10/2015 9:34:13 AM  |
| Left-right axis firmware version          | 1.17 AI1DI2DO2 Stepper 2   |             |                        |
| Front-back axis firmware version          | 1.17 AI1DI2DO2 Stepper 2   |             |                        |
| Vertical axis firmware version            | 1.17 AI1DI2DO2 Stepper 2   |             |                        |
| Chassis I/O firmware version              | 1.11 AI1DI0DO4 Norgren I/O |             |                        |
| Configuration                             |                            |             |                        |
| Alternate titration position              | Titration position         |             |                        |
| Alternate reference position              | Reference position         |             |                        |
| Maximum standard vial volume              | 3.50 mL                    |             |                        |
| Maximum alternate vial volume             | 25.00 mL                   |             |                        |
| Automatic action idle period              | 5 minute(s)                |             |                        |
| Titration tube volume                     | 1.3 mL                     |             |                        |
| Syringe flush count                       | 3.50                       |             |                        |
| Flowing wash pump volume                  | 20.0 mL                    |             |                        |
| Flowing wash stir duration                | 5 s                        |             |                        |
| Flowing wash stir speed                   | 30%                        |             |                        |
| Solvent wash stir duration                | 5 s                        |             |                        |
| Solvent wash stir speed                   | 30%                        |             |                        |
| Surfactant wash stir duration             | 5 s                        |             |                        |
| Surfactant wash stir speed                | 30%                        |             |                        |
| E0 calibration minimum number of points   | 10                         |             |                        |
| E0 calibration maximum standard deviation | 0.01500                    |             |                        |
| E0 calibration timeout period             | 60 s                       |             |                        |
| E0 calibration stir duration              | 5 s                        |             |                        |
| E0 calibration preparation stir speed     | 30%                        |             |                        |
| E0 calibration buffer wash stir duration  | 5 s                        |             |                        |
| E0 calibration buffer wash stir speed     | 30%                        |             |                        |
| E0 calibration reading stir speed         | 0%                         |             |                        |

Sample name: **M09\_octanol** Experiment start time: **3/2/2018 10:00:20 PM**  
 Assay name: **pH-metric high logP** Analyst: **Pion**  
 Assay ID: **18C-02010** Instrument ID: **T312060**  
 Filename: **C:\Sirius\_T3\Mehtap\20180302\_exp29\_logP\_T3-2\18C-02010\_M09\_octanol\_pH-metric high logP.t3r**

## Instrument Settings (continued)

| Setting                                     | Value   | Batch Id | Install date |
|---------------------------------------------|---------|----------|--------------|
| Spectrometer calibration stir duration      | 5 s     |          |              |
| Spectrometer calibration stir speed         | 30%     |          |              |
| Spectrometer calibration wash pump volume   | 20.0 mL |          |              |
| Spectrometer calibration wash stir duration | 5 s     |          |              |
| Spectrometer calibration wash stir speed    | 30%     |          |              |
| Overhead dispense height                    | 10000   |          |              |

## Refinement Settings

| Setting                        | Value    | Default value |
|--------------------------------|----------|---------------|
| Turbidity detection method     | None     | None          |
| Turbidity wavelength to assess | 500.0 nm | 500.0 nm      |
| Turbidity maximum absorbance   | 0.100    | 0.100         |
| Turbidity probe threshold      | 50.00    | 50.00         |

## Experiment Log

[2:37] Air gap created for Water (0.15 M KCl)  
 [2:38] Air gap created for Acid (0.5 M HCl)  
 [2:38] Air gap created for Base (0.5 M KOH)  
 [2:39] Air gap released for Water (0.15 M KCl)  
 [2:42] Titrator arm moved over Titration position  
 [2:42] Titration 1 of 3  
 [2:42] Adding initial titrants  
 [2:42] Automatically add 1.50000 mL of water  
 [3:08] Dispensed 1.500000 mL of Water (0.15 M KCl)  
 [3:12] Titrator arm moved over Drain  
 [5:53] Titrator arm moved to Titration position  
 [5:53] Argon flow rate set to 100  
 [5:53] Stirrer speed set to 10  
 [5:58] Automatically add 0.03000 mL of Octanol  
 [5:59] Dispensed 0.030009 mL of Octanol  
 [6:00] Initial pH = 4.31  
 [6:00] Iterative adjust 4.31 -> 2.00  
 [6:00] pH 4.31 -> 2.00  
 [6:02] Air gap released for Acid (0.5 M HCl)  
 [6:03] Dispensed 0.043815 mL of Acid (0.5 M HCl)  
 [6:08] pH 2.02 -> 2.00  
 [6:08] Dispensed 0.001717 mL of Acid (0.5 M HCl)  
 [6:13] Holding pH 2.00  
 [8:13] Stirrer speed set to 0  
 [8:13] Stirrer speed set to 50  
 [8:13] Iterative adjust 1.97 -> 2.00  
 [8:13] pH 1.97 -> 2.00  
 [8:14] Air gap released for Base (0.5 M KOH)  
 [8:15] Dispensed 0.002846 mL of Base (0.5 M KOH)  
 [9:05] Stirrer speed set to 0  
 [9:15] Datapoint id 1 collected  
 [9:15] Stirrer speed set to 50  
 [9:20] pH 2.03 -> 2.23  
 [9:20] Using cautious pH adjust  
 [9:20] Dispensed 0.007173 mL of Base (0.5 M KOH)  
 [9:25] Stepping pH = 2.10  
 [9:26] Dispensed 0.007832 mL of Base (0.5 M KOH)  
 [9:31] Stepping pH = 2.21  
 [9:31] Dispensed 0.001270 mL of Base (0.5 M KOH)  
 [9:36] Stepping pH = 2.24  
 [9:51] Stirrer speed set to 0  
 [10:01] Datapoint id 2 collected

Sample name: **M09\_octanol**  
Assay name: **pH-metric high logP**  
Assay ID: **18C-02010**  
Filename: **C:\Sirius\_T3\Mehtap\20180302\_exp29\_logP\_T3-2\18C-02010\_M09\_octanol\_pH-metric high logP.t3r**

Experiment start time: **3/2/2018 10:00:20 PM**  
Analyst: **Pion**  
Instrument ID: **T312060**

## Experiment Log (continued)

[10:01] Charge balance equation is out by -13.4%  
[10:01] Stirrer speed set to 50  
[10:06] pH 2.26 -> 2.46  
[10:06] Using charge balance adjust  
[10:07] Dispensed 0.008514 mL of Base (0.5 M KOH)  
[10:27] Stirrer speed set to 0  
[10:37] Datapoint id 3 collected  
[10:37] Charge balance equation is out by -7.5%  
[10:37] Stirrer speed set to 50  
[10:42] pH 2.45 -> 2.65  
[10:42] Using charge balance adjust  
[10:43] Dispensed 0.005503 mL of Base (0.5 M KOH)  
[11:03] Stirrer speed set to 0  
[11:13] Datapoint id 4 collected  
[11:13] Charge balance equation is out by -12.9%  
[11:13] Stirrer speed set to 50  
[11:18] pH 2.63 -> 2.83  
[11:18] Using charge balance adjust  
[11:18] Dispensed 0.003692 mL of Base (0.5 M KOH)  
[11:38] Stirrer speed set to 0  
[11:48] Datapoint id 5 collected  
[11:48] Charge balance equation is out by 3.3%  
[11:48] Stirrer speed set to 50  
[11:54] pH 2.84 -> 3.04  
[11:54] Using charge balance adjust  
[11:54] Dispensed 0.002399 mL of Base (0.5 M KOH)  
[12:14] Stirrer speed set to 0  
[12:24] Datapoint id 6 collected  
[12:24] Charge balance equation is out by -8.2%  
[12:24] Stirrer speed set to 50  
[12:29] pH 3.03 -> 3.23  
[12:29] Using charge balance adjust  
[12:29] Dispensed 0.001717 mL of Base (0.5 M KOH)  
[12:49] Stirrer speed set to 0  
[12:59] Datapoint id 7 collected  
[12:59] Charge balance equation is out by -2.1%  
[12:59] Stirrer speed set to 50  
[13:04] pH 3.23 -> 3.43  
[13:04] Using charge balance adjust  
[13:05] Dispensed 0.001317 mL of Base (0.5 M KOH)  
[13:25] Stirrer speed set to 0  
[13:35] Datapoint id 8 collected  
[13:35] Charge balance equation is out by 15.0%  
[13:35] Stirrer speed set to 50  
[13:40] pH 3.47 -> 3.67  
[13:40] Using charge balance adjust  
[13:40] Dispensed 0.001082 mL of Base (0.5 M KOH)  
[14:00] Stirrer speed set to 0  
[14:10] Datapoint id 9 collected  
[14:10] Charge balance equation is out by 31.3%  
[14:10] Stirrer speed set to 50  
[14:15] pH 3.73 -> 3.93  
[14:15] Using cautious pH adjust  
[14:15] Dispensed 0.000494 mL of Base (0.5 M KOH)  
[14:21] Stepping pH = 3.81  
[14:21] Dispensed 0.000447 mL of Base (0.5 M KOH)  
[14:26] Stepping pH = 3.94  
[14:41] Stirrer speed set to 0  
[14:51] Datapoint id 10 collected

Sample name: **M09\_octanol**  
Assay name: **pH-metric high logP**  
Assay ID: **18C-02010**  
Filename: **C:\Sirius\_T3\Mehtap\20180302\_exp29\_logP\_T3-2\18C-02010\_M09\_octanol\_pH-metric high logP.t3r**

Experiment start time: **3/2/2018 10:00:20 PM**  
Analyst: **Pion**  
Instrument ID: **T312060**

## Experiment Log (continued)

[14:51] Charge balance equation is out by 3.1%  
[14:51] Stirrer speed set to 50  
[14:56] pH 3.97 -> 4.17  
[14:56] Using charge balance adjust  
[14:56] Dispensed 0.000870 mL of Base (0.5 M KOH)  
[15:16] Stirrer speed set to 0  
[15:28] Datapoint id 11 collected  
[15:28] Charge balance equation is out by 10.9%  
[15:28] Stirrer speed set to 50  
[15:33] pH 4.20 -> 4.40  
[15:33] Using charge balance adjust  
[15:33] Dispensed 0.000706 mL of Base (0.5 M KOH)  
[15:53] Stirrer speed set to 0  
[16:04] Datapoint id 12 collected  
[16:04] Charge balance equation is out by -22.6%  
[16:04] Stirrer speed set to 50  
[16:09] pH 4.36 -> 4.56  
[16:09] Using cautious pH adjust  
[16:09] Dispensed 0.000306 mL of Base (0.5 M KOH)  
[16:14] Stepping pH = 4.41  
[16:14] Dispensed 0.000447 mL of Base (0.5 M KOH)  
[16:19] Stepping pH = 4.52  
[16:19] Dispensed 0.000118 mL of Base (0.5 M KOH)  
[16:24] Stepping pH = 4.55  
[16:24] Dispensed 0.000047 mL of Base (0.5 M KOH)  
[16:29] Stepping pH = 4.56  
[16:45] Stirrer speed set to 0  
[16:55] Datapoint id 13 collected  
[16:55] Charge balance equation is out by -53.1%  
[16:55] Stirrer speed set to 50  
[17:00] pH 4.56 -> 4.76  
[17:00] Using cautious pH adjust  
[17:00] Dispensed 0.000235 mL of Base (0.5 M KOH)  
[17:06] Stepping pH = 4.60  
[17:06] Dispensed 0.000329 mL of Base (0.5 M KOH)  
[17:11] Stepping pH = 4.70  
[17:11] Dispensed 0.000165 mL of Base (0.5 M KOH)  
[17:16] Stepping pH = 4.75  
[17:16] Dispensed 0.000024 mL of Base (0.5 M KOH)  
[17:21] Stepping pH = 4.76  
[17:36] Stirrer speed set to 0  
[17:47] Datapoint id 14 collected  
[17:47] Charge balance equation is out by -67.5%  
[17:47] Stirrer speed set to 50  
[17:52] pH 4.77 -> 4.97  
[17:52] Using cautious pH adjust  
[17:52] Dispensed 0.000165 mL of Base (0.5 M KOH)  
[17:57] Stepping pH = 4.79  
[17:57] Dispensed 0.000400 mL of Base (0.5 M KOH)  
[18:03] Stepping pH = 4.92  
[18:03] Dispensed 0.000118 mL of Base (0.5 M KOH)  
[18:08] Stepping pH = 4.98  
[18:23] Stirrer speed set to 0  
[18:35] Datapoint id 15 collected  
[18:35] Charge balance equation is out by -106.8%  
[18:35] Stirrer speed set to 50  
[18:40] pH 5.01 -> 5.21  
[18:40] Using cautious pH adjust  
[18:41] Dispensed 0.000094 mL of Base (0.5 M KOH)

Sample name: **M09\_octanol**  
Assay name: **pH-metric high logP**  
Assay ID: **18C-02010**  
Filename: **C:\Sirius\_T3\Mehtap\20180302\_exp29\_logP\_T3-2\18C-02010\_M09\_octanol\_pH-metric high logP.t3r**

Experiment start time: **3/2/2018 10:00:20 PM**  
Analyst: **Pion**  
Instrument ID: **T312060**

## Experiment Log (continued)

[18:46] Stepping pH = 5.01  
[18:46] Dispensed 0.000306 mL of Base (0.5 M KOH)  
[18:51] Stepping pH = 5.16  
[18:51] Dispensed 0.000071 mL of Base (0.5 M KOH)  
[18:56] Stepping pH = 5.22  
[19:11] Stirrer speed set to 0  
[19:25] Datapoint id 16 collected  
[19:25] Charge balance equation is out by -128.8%  
[19:25] Stirrer speed set to 50  
[19:30] pH 5.26 -> 5.46  
[19:30] Using cautious pH adjust  
[19:30] Dispensed 0.000071 mL of Base (0.5 M KOH)  
[19:35] Stepping pH = 5.26  
[19:35] Dispensed 0.000329 mL of Base (0.5 M KOH)  
[19:40] Stepping pH = 5.52  
[19:55] Stirrer speed set to 0  
[20:11] Datapoint id 17 collected  
[20:11] Charge balance equation is out by -200.5%  
[20:11] Stirrer speed set to 50  
[20:16] pH 5.72 -> 5.92  
[20:16] Using cautious pH adjust  
[20:16] Dispensed 0.000047 mL of Base (0.5 M KOH)  
[20:21] Stepping pH = 5.73  
[20:22] Dispensed 0.000094 mL of Base (0.5 M KOH)  
[20:27] Stepping pH = 5.79  
[20:27] Dispensed 0.000118 mL of Base (0.5 M KOH)  
[20:32] Stepping pH = 5.94  
[20:47] Stirrer speed set to 0  
[21:08] Datapoint id 18 collected  
[21:08] Charge balance equation is out by -265.1%  
[21:08] Stirrer speed set to 50  
[21:13] pH 6.11 -> 6.31  
[21:13] Using cautious pH adjust  
[21:13] Dispensed 0.000024 mL of Base (0.5 M KOH)  
[21:18] Stepping pH = 6.11  
[21:18] Dispensed 0.000141 mL of Base (0.5 M KOH)  
[21:23] Stepping pH = 6.26  
[21:23] Dispensed 0.000047 mL of Base (0.5 M KOH)  
[21:29] Stepping pH = 6.65  
[21:44] Stirrer speed set to 0  
[22:44] Datapoint id 19 collected  
[22:44] Charge balance equation is out by -268.6%  
[22:44] Stirrer speed set to 50  
[22:49] pH 7.06 -> 7.26  
[22:49] Using cautious pH adjust  
[22:49] Dispensed 0.000024 mL of Base (0.5 M KOH)  
[22:54] Stepping pH = 7.04  
[22:54] Dispensed 0.000047 mL of Base (0.5 M KOH)  
[22:59] Stepping pH = 7.13  
[22:59] Dispensed 0.000047 mL of Base (0.5 M KOH)  
[23:04] Stepping pH = 7.50  
[23:19] Stirrer speed set to 0  
[24:19] Datapoint id 20 collected  
[24:19] Charge balance equation is out by -526.7%  
[24:19] Stirrer speed set to 50  
[24:24] pH 8.19 -> 8.39  
[24:24] Using cautious pH adjust  
[24:24] Dispensed 0.000024 mL of Base (0.5 M KOH)  
[24:29] Stepping pH = 8.16

Sample name: **M09\_octanol**  
Assay name: **pH-metric high logP**  
Assay ID: **18C-02010**  
Filename: **C:\Sirius\_T3\Mehtap\20180302\_exp29\_logP\_T3-2\18C-02010\_M09\_octanol\_pH-metric high logP.t3r**

Experiment start time: **3/2/2018 10:00:20 PM**  
Analyst: **Pion**  
Instrument ID: **T312060**

## Experiment Log (continued)

[24:29] Dispensed 0.000024 mL of Base (0.5 M KOH)  
[24:35] Stepping pH = 8.20  
[24:35] Dispensed 0.000047 mL of Base (0.5 M KOH)  
[24:40] Stepping pH = 8.49  
[24:55] Stirrer speed set to 0  
[25:49] Datapoint id 21 collected  
[25:49] Charge balance equation is out by -997.9%  
[25:49] Stirrer speed set to 50  
[25:55] pH 8.47 -> 8.67  
[25:55] Using cautious pH adjust  
[25:55] Dispensed 0.000024 mL of Base (0.5 M KOH)  
[26:00] Stepping pH = 8.43  
[26:00] Dispensed 0.000047 mL of Base (0.5 M KOH)  
[26:05] Stepping pH = 8.40  
[26:05] Dispensed 0.000212 mL of Base (0.5 M KOH)  
[26:10] Stepping pH = 9.23  
[26:25] Stirrer speed set to 0  
[26:47] Datapoint id 22 collected  
[26:47] Charge balance equation is out by -1,935.7%  
[26:47] Titration 2 of 3  
[26:47] Adding initial titrants  
[26:47] Automatically add 0.04000 mL of Octanol  
[26:48] Dispensed 0.040005 mL of Octanol  
[26:48] Stirrer speed set to 10  
[26:49] Stirrer speed set to 55  
[26:49] Iterative adjust 9.48 -> 2.00  
[26:49] pH 9.48 -> 2.00  
[26:50] Dispensed 0.048871 mL of Acid (0.5 M HCl)  
[26:55] pH 2.05 -> 2.00  
[26:55] Dispensed 0.005268 mL of Acid (0.5 M HCl)  
[27:46] Stirrer speed set to 0  
[27:56] Datapoint id 23 collected  
[27:56] Stirrer speed set to 55  
[28:01] pH 1.98 -> 2.18  
[28:01] Using cautious pH adjust  
[28:01] Dispensed 0.008702 mL of Base (0.5 M KOH)  
[28:06] Stepping pH = 2.05  
[28:06] Dispensed 0.008302 mL of Base (0.5 M KOH)  
[28:12] Stepping pH = 2.15  
[28:12] Dispensed 0.001599 mL of Base (0.5 M KOH)  
[28:17] Stepping pH = 2.18  
[28:32] Stirrer speed set to 0  
[28:42] Datapoint id 24 collected  
[28:42] Charge balance equation is out by -6.9%  
[28:42] Stirrer speed set to 55  
[28:47] pH 2.19 -> 2.39  
[28:47] Using charge balance adjust  
[28:48] Dispensed 0.010560 mL of Base (0.5 M KOH)  
[29:08] Stirrer speed set to 0  
[29:18] Datapoint id 25 collected  
[29:18] Charge balance equation is out by -5.9%  
[29:18] Stirrer speed set to 55  
[29:23] pH 2.39 -> 2.59  
[29:23] Using charge balance adjust  
[29:23] Dispensed 0.006820 mL of Base (0.5 M KOH)  
[29:44] Stirrer speed set to 0  
[29:54] Datapoint id 26 collected  
[29:54] Charge balance equation is out by 6.5%  
[29:54] Stirrer speed set to 55



Sample name: **M09\_octanol**  
Assay name: **pH-metric high logP**  
Assay ID: **18C-02010**  
Filename: **C:\Sirius\_T3\Mehtap\20180302\_exp29\_logP\_T3-2\18C-02010\_M09\_octanol\_pH-metric high logP.t3r**

Experiment start time: **3/2/2018 10:00:20 PM**  
Analyst: **Pion**  
Instrument ID: **T312060**

## Experiment Log (continued)

[29:59] pH 2.61 -> 2.81  
[29:59] Using charge balance adjust  
[30:00] Dispensed 0.004257 mL of Base (0.5 M KOH)  
[30:20] Stirrer speed set to 0  
[30:30] Datapoint id 27 collected  
[30:30] Charge balance equation is out by -12.7%  
[30:30] Stirrer speed set to 55  
[30:35] pH 2.78 -> 2.98  
[30:35] Using charge balance adjust  
[30:36] Dispensed 0.002987 mL of Base (0.5 M KOH)  
[30:56] Stirrer speed set to 0  
[31:06] Datapoint id 28 collected  
[31:06] Charge balance equation is out by 0.0%  
[31:06] Stirrer speed set to 55  
[31:11] pH 2.99 -> 3.19  
[31:11] Using charge balance adjust  
[31:11] Dispensed 0.002117 mL of Base (0.5 M KOH)  
[31:31] Stirrer speed set to 0  
[31:42] Datapoint id 29 collected  
[31:42] Charge balance equation is out by -3.1%  
[31:42] Stirrer speed set to 55  
[31:47] pH 3.18 -> 3.38  
[31:47] Using charge balance adjust  
[31:47] Dispensed 0.001623 mL of Base (0.5 M KOH)  
[32:07] Stirrer speed set to 0  
[32:17] Datapoint id 30 collected  
[32:17] Charge balance equation is out by -13.1%  
[32:17] Stirrer speed set to 55  
[32:22] pH 3.36 -> 3.56  
[32:22] Using charge balance adjust  
[32:22] Dispensed 0.001364 mL of Base (0.5 M KOH)  
[32:43] Stirrer speed set to 0  
[32:53] Datapoint id 31 collected  
[32:53] Charge balance equation is out by 7.5%  
[32:53] Stirrer speed set to 55  
[32:58] pH 3.58 -> 3.78  
[32:58] Using charge balance adjust  
[32:58] Dispensed 0.001129 mL of Base (0.5 M KOH)  
[33:18] Stirrer speed set to 0  
[33:28] Datapoint id 32 collected  
[33:28] Charge balance equation is out by 30.1%  
[33:28] Stirrer speed set to 55  
[33:33] pH 3.84 -> 4.04  
[33:33] Using cautious pH adjust  
[33:33] Dispensed 0.000447 mL of Base (0.5 M KOH)  
[33:38] Stepping pH = 3.91  
[33:38] Dispensed 0.000470 mL of Base (0.5 M KOH)  
[33:44] Stepping pH = 4.03  
[33:59] Stirrer speed set to 0  
[34:09] Datapoint id 33 collected  
[34:09] Charge balance equation is out by -3.9%  
[34:09] Stirrer speed set to 55  
[34:14] pH 4.08 -> 4.28  
[34:14] Using charge balance adjust  
[34:14] Dispensed 0.000659 mL of Base (0.5 M KOH)  
[34:35] Stirrer speed set to 0  
[34:45] Datapoint id 34 collected  
[34:45] Charge balance equation is out by 5.3%  
[34:45] Stirrer speed set to 55

Sample name: **M09\_octanol**  
Assay name: **pH-metric high logP**  
Assay ID: **18C-02010**  
Filename: **C:\Sirius\_T3\Mehtap\20180302\_exp29\_logP\_T3-2\18C-02010\_M09\_octanol\_pH-metric high logP.t3r**

Experiment start time: **3/2/2018 10:00:20 PM**  
Analyst: **Pion**  
Instrument ID: **T312060**

## Experiment Log (continued)

[34:50] pH 4.30 -> 4.50  
[34:50] Using charge balance adjust  
[34:50] Dispensed 0.000470 mL of Base (0.5 M KOH)  
[35:10] Stirrer speed set to 0  
[35:20] Datapoint id 35 collected  
[35:20] Charge balance equation is out by -24.5%  
[35:20] Stirrer speed set to 55  
[35:25] pH 4.46 -> 4.66  
[35:25] Using cautious pH adjust  
[35:25] Dispensed 0.000188 mL of Base (0.5 M KOH)  
[35:30] Stepping pH = 4.50  
[35:30] Dispensed 0.000306 mL of Base (0.5 M KOH)  
[35:36] Stepping pH = 4.61  
[35:36] Dispensed 0.000094 mL of Base (0.5 M KOH)  
[35:41] Stepping pH = 4.67  
[35:56] Stirrer speed set to 0  
[36:06] Datapoint id 36 collected  
[36:06] Charge balance equation is out by -61.6%  
[36:06] Stirrer speed set to 55  
[36:11] pH 4.71 -> 4.91  
[36:11] Using cautious pH adjust  
[36:12] Dispensed 0.000118 mL of Base (0.5 M KOH)  
[36:17] Stepping pH = 4.74  
[36:17] Dispensed 0.000235 mL of Base (0.5 M KOH)  
[36:22] Stepping pH = 4.88  
[36:22] Dispensed 0.000047 mL of Base (0.5 M KOH)  
[36:27] Stepping pH = 4.93  
[36:42] Stirrer speed set to 0  
[36:53] Datapoint id 37 collected  
[36:53] Charge balance equation is out by -76.9%  
[36:53] Stirrer speed set to 55  
[36:58] pH 4.98 -> 5.18  
[36:58] Using cautious pH adjust  
[36:58] Dispensed 0.000071 mL of Base (0.5 M KOH)  
[37:03] Stepping pH = 5.00  
[37:03] Dispensed 0.000188 mL of Base (0.5 M KOH)  
[37:09] Stepping pH = 5.17  
[37:09] Dispensed 0.000024 mL of Base (0.5 M KOH)  
[37:14] Stepping pH = 5.23  
[37:29] Stirrer speed set to 0  
[37:41] Datapoint id 38 collected  
[37:41] Charge balance equation is out by -100.4%  
[37:41] Stirrer speed set to 55  
[37:46] pH 5.31 -> 5.51  
[37:46] Using cautious pH adjust  
[37:46] Dispensed 0.000047 mL of Base (0.5 M KOH)  
[37:51] Stepping pH = 5.32  
[37:51] Dispensed 0.000118 mL of Base (0.5 M KOH)  
[37:56] Stepping pH = 5.49  
[37:56] Dispensed 0.000024 mL of Base (0.5 M KOH)  
[38:01] Stepping pH = 5.62  
[38:17] Stirrer speed set to 0  
[38:32] Datapoint id 39 collected  
[38:32] Charge balance equation is out by -114.7%  
[38:32] Stirrer speed set to 55  
[38:37] pH 5.77 -> 5.97  
[38:37] Using cautious pH adjust  
[38:37] Dispensed 0.000024 mL of Base (0.5 M KOH)  
[38:42] Stepping pH = 5.78



Sample name: **M09\_octanol**  
Assay name: **pH-metric high logP**  
Assay ID: **18C-02010**  
Filename: **C:\Sirius\_T3\Mehtap\20180302\_exp29\_logP\_T3-2\18C-02010\_M09\_octanol\_pH-metric high logP.t3r**

Experiment start time: **3/2/2018 10:00:20 PM**  
Analyst: **Pion**  
Instrument ID: **T312060**

## Experiment Log (continued)

[38:42] Dispensed 0.000071 mL of Base (0.5 M KOH)  
[38:48] Stepping pH = 5.95  
[38:48] Dispensed 0.000024 mL of Base (0.5 M KOH)  
[38:53] Stepping pH = 6.16  
[39:08] Stirrer speed set to 0  
[39:55] Datapoint id 40 collected  
[39:55] Charge balance equation is out by -131.1%  
[39:55] Stirrer speed set to 55  
[40:00] pH 6.40 -> 6.60  
[40:00] Using cautious pH adjust  
[40:00] Dispensed 0.000024 mL of Base (0.5 M KOH)  
[40:05] Stepping pH = 6.45  
[40:05] Dispensed 0.000024 mL of Base (0.5 M KOH)  
[40:10] Stepping pH = 6.54  
[40:10] Dispensed 0.000024 mL of Base (0.5 M KOH)  
[40:15] Stepping pH = 6.77  
[40:31] Stirrer speed set to 0  
[41:31] Datapoint id 41 collected  
[41:31] Charge balance equation is out by -75.8%  
[41:31] Stirrer speed set to 55  
[41:36] pH 7.09 -> 7.29  
[41:36] Using cautious pH adjust  
[41:36] Dispensed 0.000024 mL of Base (0.5 M KOH)  
[41:41] Stepping pH = 7.03  
[41:41] Dispensed 0.000047 mL of Base (0.5 M KOH)  
[41:46] Stepping pH = 7.49  
[42:01] Stirrer speed set to 0  
[42:59] Datapoint id 42 collected  
[42:59] Charge balance equation is out by -364.7%  
[42:59] Stirrer speed set to 55  
[43:04] pH 8.28 -> 8.48  
[43:04] Using cautious pH adjust  
[43:04] Dispensed 0.000024 mL of Base (0.5 M KOH)  
[43:09] Stepping pH = 8.37  
[43:09] Dispensed 0.000024 mL of Base (0.5 M KOH)  
[43:15] Stepping pH = 8.52  
[43:30] Stirrer speed set to 0  
[44:05] Datapoint id 43 collected  
[44:05] Charge balance equation is out by -286.1%  
[44:05] Stirrer speed set to 55  
[44:10] pH 8.68 -> 8.88  
[44:10] Using cautious pH adjust  
[44:10] Dispensed 0.000024 mL of Base (0.5 M KOH)  
[44:15] Stepping pH = 8.68  
[44:15] Dispensed 0.000047 mL of Base (0.5 M KOH)  
[44:20] Stepping pH = 8.76  
[44:20] Dispensed 0.000047 mL of Base (0.5 M KOH)  
[44:25] Stepping pH = 8.85  
[44:25] Dispensed 0.000024 mL of Base (0.5 M KOH)  
[44:30] Stepping pH = 8.98  
[44:46] Stirrer speed set to 0  
[45:06] Datapoint id 44 collected  
[45:06] Charge balance equation is out by -572.8%  
[45:06] Titration 3 of 3  
[45:06] Adding initial titrants  
[45:06] Automatically add 0.10000 mL of Octanol  
[45:08] Dispensed 0.100000 mL of Octanol  
[45:08] Stirrer speed set to 10  
[45:10] Stirrer speed set to 60

Sample name: **M09\_octanol**  
Assay name: **pH-metric high logP**  
Assay ID: **18C-02010**  
Filename: **C:\Sirius\_T3\Mehtap\20180302\_exp29\_logP\_T3-2\18C-02010\_M09\_octanol\_pH-metric high logP.t3r**

Experiment start time: **3/2/2018 10:00:20 PM**  
Analyst: **Pion**  
Instrument ID: **T312060**

## Experiment Log (continued)

[45:10] Iterative adjust 9.09 -> 2.00  
[45:10] pH 9.09 -> 2.00  
[45:11] Dispensed 0.051529 mL of Acid (0.5 M HCl)  
[45:16] pH 2.06 -> 2.00  
[45:16] Dispensed 0.006326 mL of Acid (0.5 M HCl)  
[46:07] Stirrer speed set to 0  
[46:17] Datapoint id 45 collected  
[46:17] Stirrer speed set to 60  
[46:22] pH 1.97 -> 2.17  
[46:22] Using cautious pH adjust  
[46:22] Dispensed 0.009431 mL of Base (0.5 M KOH)  
[46:27] Stepping pH = 2.04  
[46:27] Dispensed 0.009525 mL of Base (0.5 M KOH)  
[46:32] Stepping pH = 2.15  
[46:33] Dispensed 0.001623 mL of Base (0.5 M KOH)  
[46:38] Stepping pH = 2.18  
[46:53] Stirrer speed set to 0  
[47:03] Datapoint id 46 collected  
[47:03] Charge balance equation is out by -9.2%  
[47:03] Stirrer speed set to 60  
[47:08] pH 2.19 -> 2.39  
[47:08] Using charge balance adjust  
[47:08] Dispensed 0.011430 mL of Base (0.5 M KOH)  
[47:28] Stirrer speed set to 0  
[47:38] Datapoint id 47 collected  
[47:38] Charge balance equation is out by -4.3%  
[47:38] Stirrer speed set to 60  
[47:44] pH 2.39 -> 2.59  
[47:44] Using charge balance adjust  
[47:44] Dispensed 0.007385 mL of Base (0.5 M KOH)  
[48:04] Stirrer speed set to 0  
[48:15] Datapoint id 48 collected  
[48:15] Charge balance equation is out by -1.9%  
[48:15] Stirrer speed set to 60  
[48:20] pH 2.59 -> 2.79  
[48:20] Using charge balance adjust  
[48:20] Dispensed 0.004821 mL of Base (0.5 M KOH)  
[48:40] Stirrer speed set to 0  
[48:56] Datapoint id 49 collected  
[48:56] Charge balance equation is out by 5.6%  
[48:56] Stirrer speed set to 60  
[49:01] pH 2.81 -> 3.01  
[49:01] Using charge balance adjust  
[49:01] Dispensed 0.003198 mL of Base (0.5 M KOH)  
[49:21] Stirrer speed set to 0  
[49:36] Datapoint id 50 collected  
[49:36] Charge balance equation is out by -4.8%  
[49:36] Stirrer speed set to 60  
[49:41] pH 3.00 -> 3.20  
[49:41] Using charge balance adjust  
[49:41] Dispensed 0.002328 mL of Base (0.5 M KOH)  
[50:01] Stirrer speed set to 0  
[50:11] Datapoint id 51 collected  
[50:11] Charge balance equation is out by -14.6%  
[50:11] Stirrer speed set to 60  
[50:16] pH 3.18 -> 3.38  
[50:16] Using charge balance adjust  
[50:16] Dispensed 0.001834 mL of Base (0.5 M KOH)  
[50:37] Stirrer speed set to 0

Sample name: **M09\_octanol**  
 Assay name: **pH-metric high logP**  
 Assay ID: **18C-02010**  
 Filename: **C:\Sirius\_T3\Mehtap\20180302\_exp29\_logP\_T3-2\18C-02010\_M09\_octanol\_pH-metric high logP.t3r**

Experiment start time: **3/2/2018 10:00:20 PM**  
 Analyst: **Pion**  
 Instrument ID: **T312060**

## Experiment Log (continued)

[50:47] Datapoint id 52 collected  
 [50:47] Charge balance equation is out by -5.0%  
 [50:47] Stirrer speed set to 60  
 [50:52] pH 3.37 -> 3.57  
 [50:52] Using charge balance adjust  
 [50:52] Dispensed 0.001435 mL of Base (0.5 M KOH)  
 [51:12] Stirrer speed set to 0  
 [51:22] Datapoint id 53 collected  
 [51:22] Charge balance equation is out by -4.5%  
 [51:22] Stirrer speed set to 60  
 [51:27] pH 3.57 -> 3.77  
 [51:27] Using charge balance adjust  
 [51:27] Dispensed 0.001129 mL of Base (0.5 M KOH)  
 [51:47] Stirrer speed set to 0  
 [51:57] Datapoint id 54 collected  
 [51:57] Charge balance equation is out by 5.2%  
 [51:57] Stirrer speed set to 60  
 [52:03] pH 3.78 -> 3.98  
 [52:03] Using charge balance adjust  
 [52:03] Dispensed 0.000823 mL of Base (0.5 M KOH)  
 [52:23] Stirrer speed set to 0  
 [52:37] Datapoint id 55 collected  
 [52:37] Charge balance equation is out by -5.8%  
 [52:37] Stirrer speed set to 60  
 [52:43] pH 3.98 -> 4.18  
 [52:43] Using charge balance adjust  
 [52:43] Dispensed 0.000611 mL of Base (0.5 M KOH)  
 [53:03] Stirrer speed set to 0  
 [53:13] Datapoint id 56 collected  
 [53:13] Charge balance equation is out by -17.3%  
 [53:13] Stirrer speed set to 60  
 [53:18] pH 4.15 -> 4.35  
 [53:18] Using cautious pH adjust  
 [53:18] Dispensed 0.000235 mL of Base (0.5 M KOH)  
 [53:23] Stepping pH = 4.19  
 [53:23] Dispensed 0.000400 mL of Base (0.5 M KOH)  
 [53:28] Stepping pH = 4.30  
 [53:28] Dispensed 0.000141 mL of Base (0.5 M KOH)  
 [53:33] Stepping pH = 4.38  
 [53:49] Stirrer speed set to 0  
 [54:05] Datapoint id 57 collected  
 [54:05] Charge balance equation is out by -71.6%  
 [54:05] Stirrer speed set to 60  
 [54:10] pH 4.43 -> 4.63  
 [54:10] Using cautious pH adjust  
 [54:10] Dispensed 0.000118 mL of Base (0.5 M KOH)  
 [54:15] Stepping pH = 4.44  
 [54:15] Dispensed 0.000353 mL of Base (0.5 M KOH)  
 [54:20] Stepping pH = 4.61  
 [54:20] Dispensed 0.000047 mL of Base (0.5 M KOH)  
 [54:25] Stepping pH = 4.70  
 [54:40] Stirrer speed set to 0  
 [54:51] Datapoint id 58 collected  
 [54:51] Charge balance equation is out by -107.6%  
 [54:51] Stirrer speed set to 60  
 [54:56] pH 4.76 -> 4.96  
 [54:56] Using cautious pH adjust  
 [54:56] Dispensed 0.000071 mL of Base (0.5 M KOH)  
 [55:02] Stepping pH = 4.77

Sample name: **M09\_octanol**  
Assay name: **pH-metric high logP**  
Assay ID: **18C-02010**  
Filename: **C:\Sirius\_T3\Mehtap\20180302\_exp29\_logP\_T3-2\18C-02010\_M09\_octanol\_pH-metric high logP.t3r**

Experiment start time: **3/2/2018 10:00:20 PM**  
Analyst: **Pion**  
Instrument ID: **T312060**

## Experiment Log (continued)

[55:02] Dispensed 0.000188 mL of Base (0.5 M KOH)  
[55:07] Stepping pH = 4.90  
[55:07] Dispensed 0.000071 mL of Base (0.5 M KOH)  
[55:12] Stepping pH = 5.01  
[55:27] Stirrer speed set to 0  
[55:39] Datapoint id 59 collected  
[55:39] Charge balance equation is out by -151.8%  
[55:39] Stirrer speed set to 60  
[55:44] pH 5.13 -> 5.33  
[55:44] Using cautious pH adjust  
[55:44] Dispensed 0.000024 mL of Base (0.5 M KOH)  
[55:49] Stepping pH = 5.14  
[55:49] Dispensed 0.000094 mL of Base (0.5 M KOH)  
[55:54] Stepping pH = 5.17  
[55:54] Dispensed 0.000188 mL of Base (0.5 M KOH)  
[55:59] Stepping pH = 5.59  
[56:14] Stirrer speed set to 0  
[56:57] Datapoint id 60 collected  
[56:57] Charge balance equation is out by -376.9%  
[56:57] Stirrer speed set to 60  
[57:02] pH 6.13 -> 6.33  
[57:02] Using cautious pH adjust  
[57:02] Dispensed 0.000024 mL of Base (0.5 M KOH)  
[57:07] Stepping pH = 6.17  
[57:07] Dispensed 0.000047 mL of Base (0.5 M KOH)  
[57:12] Stepping pH = 6.29  
[57:12] Dispensed 0.000024 mL of Base (0.5 M KOH)  
[57:17] Stepping pH = 6.46  
[57:32] Stirrer speed set to 0  
[58:32] Datapoint id 61 collected  
[58:32] Charge balance equation is out by -74.4%  
[58:32] Stirrer speed set to 60  
[58:37] pH 6.61 -> 6.81  
[58:37] Using cautious pH adjust  
[58:37] Dispensed 0.000024 mL of Base (0.5 M KOH)  
[58:43] Stepping pH = 6.59  
[58:43] Dispensed 0.000094 mL of Base (0.5 M KOH)  
[58:48] Stepping pH = 6.63  
[58:48] Dispensed 0.000212 mL of Base (0.5 M KOH)  
[58:53] Stepping pH = 7.68  
[59:08] Stirrer speed set to 0  
[59:40] Datapoint id 62 collected  
[59:40] Charge balance equation is out by -805.8%  
[59:40] Stirrer speed set to 60  
[59:45] pH 8.62 -> 8.82  
[59:45] Using cautious pH adjust  
[59:45] Dispensed 0.000024 mL of Base (0.5 M KOH)  
[59:50] Stepping pH = 8.65  
[59:50] Dispensed 0.000024 mL of Base (0.5 M KOH)  
[59:55] Stepping pH = 8.68  
[59:55] Dispensed 0.000047 mL of Base (0.5 M KOH)  
[1:00:01] Stepping pH = 8.75  
[1:00:01] Dispensed 0.000047 mL of Base (0.5 M KOH)  
[1:00:06] Stepping pH = 8.87  
[1:00:21] Stirrer speed set to 0  
[1:00:38] Datapoint id 63 collected  
[1:00:38] Charge balance equation is out by -507.2%  
[1:00:38] Stirrer speed set to 60  
[1:00:43] pH 8.96 -> 9.05

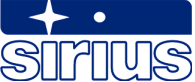

## Experiment Log

Sample name: **M09\_octanol**  
Assay name: **pH-metric high logP**  
Assay ID: **18C-02010**  
Filename: **C:\Sirius\_T3\Mehtap\20180302\_exp29\_logP\_T3-2\18C-02010\_M09\_octanol\_pH-metric high logP.t3r**

Experiment start time: **3/2/2018 10:00:20 PM**  
Analyst: **Pion**  
Instrument ID: **T312060**

### Experiment Log (continued)

[1:00:43] Using cautious pH adjust  
[1:00:43] Dispensed 0.000024 mL of Base (0.5 M KOH)  
[1:00:49] Stepping pH = 8.96  
[1:00:49] Dispensed 0.000047 mL of Base (0.5 M KOH)  
[1:00:54] Stepping pH = 9.00  
[1:01:09] Stirrer speed set to 0  
[1:01:24] Datapoint id 64 collected  
[1:01:24] Charge balance equation is out by -267.3%  
[1:01:24] Argon flow rate set to 0  
[1:01:28] Titrator arm moved over Titration position
