# Supplementary material for: Octanol-water partition coefficient measurements for the SAMPL6 Blind Prediction Challenge
Source: bioRxiv or medRxiv preprint supplement (doi:10.1101/757393), 2019-12-02
Supplement: Supplementary file [file media-2.zip]

Sample name: **M09\_octanol**  
 Assay name: **pH-metric high logP**  
 Assay ID: **18C-03001**  
 Filename: **C:\Sirius\_T3\Mehtap\20180302\_exp29\_logP\_T3-2\18C-03001\_M09\_octanol\_pH-metric high logP.t3r**

Experiment start time: **3/3/2018 12:18:26 AM**  
 Analyst: **Pion**  
 Instrument ID: **T312060**

## pH-metric Result

logP (XH +) 1.05 ±0.04 (n=50)  
 logP (neutral X) 3.14 ±0.01 (n=50)

### 18C-03001 Points 1 to 25

M09\_octanol concentration factor 1.208  
 Carbonate 0.0513 mM  
 Acidity error -0.65776 mM

### 18C-03001 Points 26 to 53

M09\_octanol concentration factor 1.218  
 Carbonate 0.1056 mM  
 Acidity error -0.76829 mM

### 18C-03001 Points 54 to 80

M09\_octanol concentration factor 1.072  
 Carbonate 0.0742 mM  
 Acidity error -0.32205 mM

## Warnings and errors

Errors None  
 Warnings None

## Sample logD and percent species

| pH     | M09_octanol<br>logD | M09_octanol<br>M09_octanolH | M09_octanol<br>M09_octanol | M09_octanol<br>M09_octanolH* | M09_octanol<br>M09_octanol* | Comment    |
|--------|---------------------|-----------------------------|----------------------------|------------------------------|-----------------------------|------------|
| 1.000  | 1.05                | 8.12 %                      | 0.00 %                     | 91.40 %                      | 0.48 %                      | Stomach pH |
| 1.200  | 1.05                | 8.10 %                      | 0.00 %                     | 91.14 %                      | 0.76 %                      |            |
| 2.000  | 1.07                | 7.78 %                      | 0.00 %                     | 87.58 %                      | 4.63 %                      |            |
| 3.000  | 1.23                | 5.49 %                      | 0.02 %                     | 61.80 %                      | 32.69 %                     |            |
| 4.000  | 1.83                | 1.39 %                      | 0.06 %                     | 15.67 %                      | 82.88 %                     |            |
| 5.000  | 2.63                | 0.16 %                      | 0.07 %                     | 1.85 %                       | 97.91 %                     | Blood pH   |
| 6.000  | 3.05                | 0.02 %                      | 0.07 %                     | 0.19 %                       | 99.72 %                     |            |
| 6.500  | 3.11                | 0.01 %                      | 0.07 %                     | 0.06 %                       | 99.86 %                     |            |
| 7.000  | 3.13                | 0.00 %                      | 0.07 %                     | 0.02 %                       | 99.91 %                     |            |
| 7.400  | 3.14                | 0.00 %                      | 0.07 %                     | 0.01 %                       | 99.92 %                     |            |
| 8.000  | 3.14                | 0.00 %                      | 0.07 %                     | 0.00 %                       | 99.93 %                     |            |
| 9.000  | 3.14                | 0.00 %                      | 0.07 %                     | 0.00 %                       | 99.93 %                     |            |
| 10.000 | 3.14                | 0.00 %                      | 0.07 %                     | 0.00 %                       | 99.93 %                     |            |
| 11.000 | 3.14                | 0.00 %                      | 0.07 %                     | 0.00 %                       | 99.93 %                     |            |
| 12.000 | 3.14                | 0.00 %                      | 0.07 %                     | 0.00 %                       | 99.93 %                     |            |

Sample name: **M09\_octanol**  
 Assay name: **pH-metric high logP**  
 Assay ID: **18C-03001**  
 Filename: **C:\Sirius\_T3\Mehtap\20180302\_exp29\_logP\_T3-2\18C-03001\_M09\_octanol\_pH-metric high logP.t3r**

Experiment start time: **3/3/2018 12:18:26 AM**  
 Analyst: **Pion**  
 Instrument ID: **T312060**

## Graphs

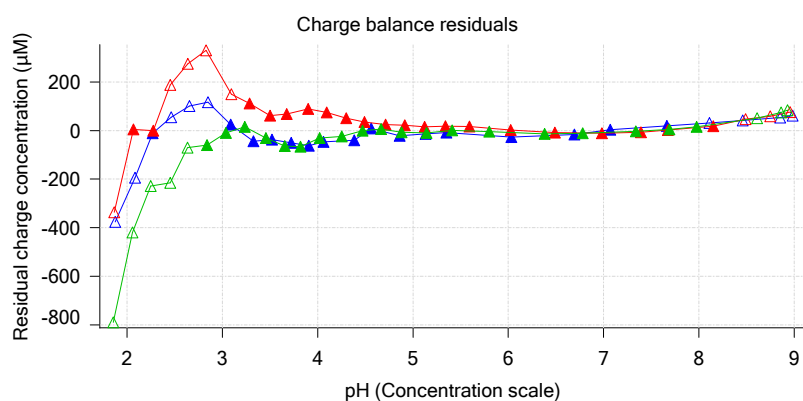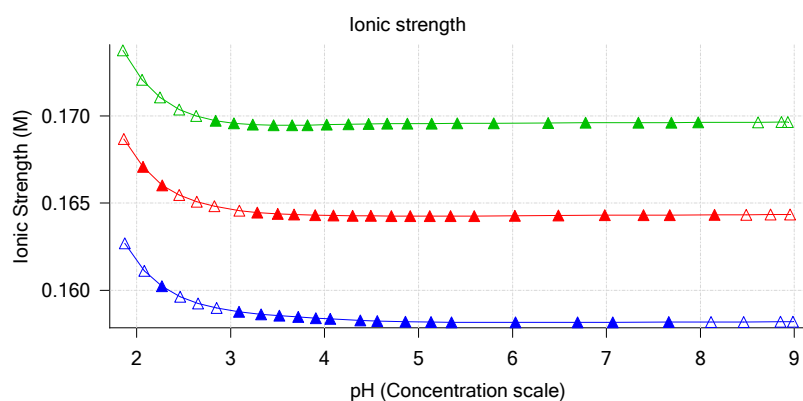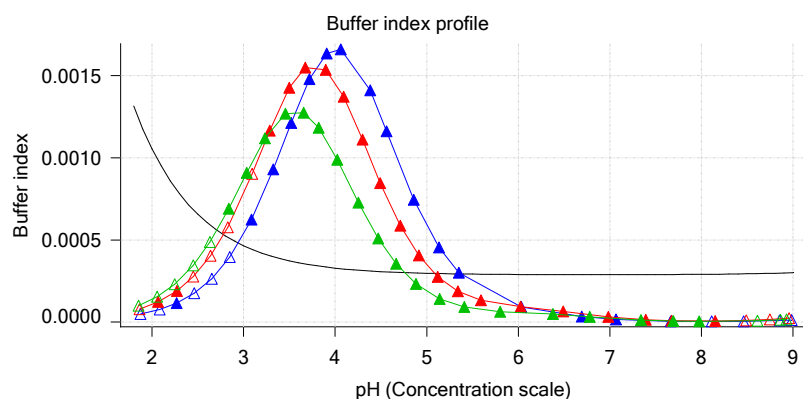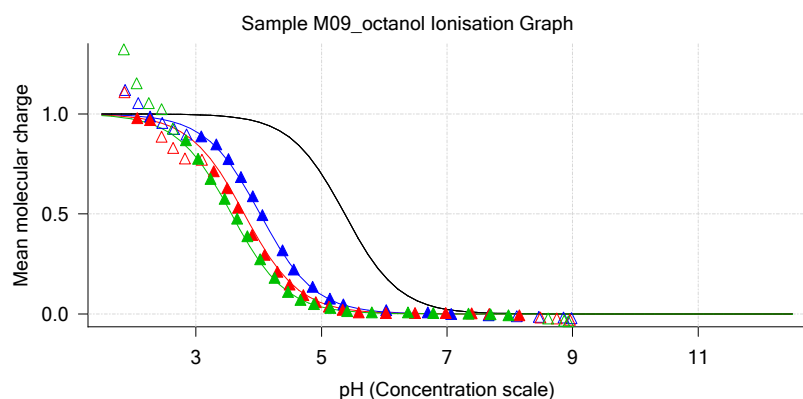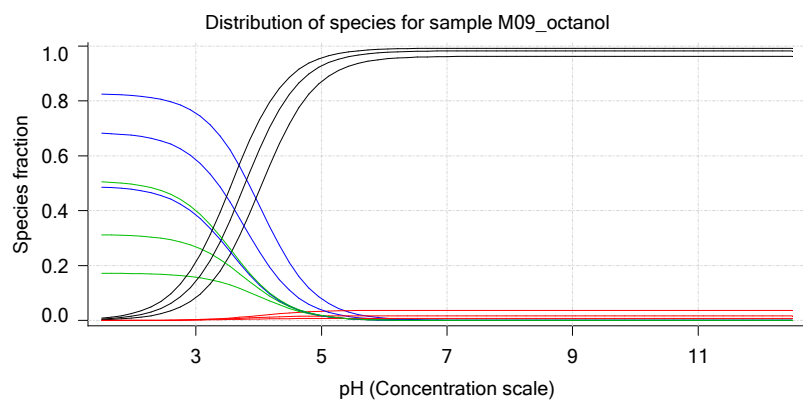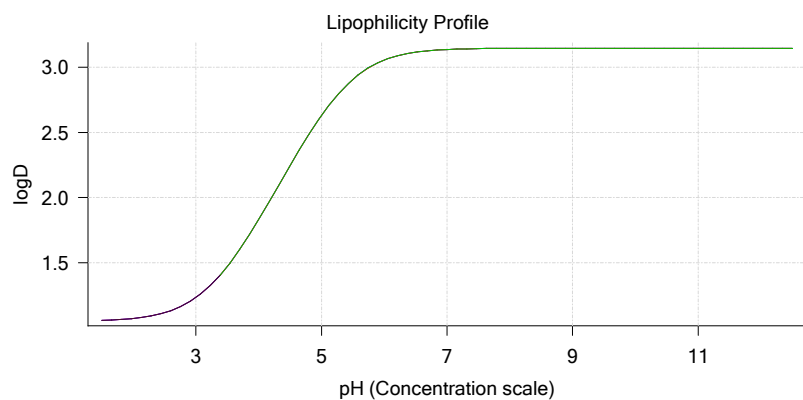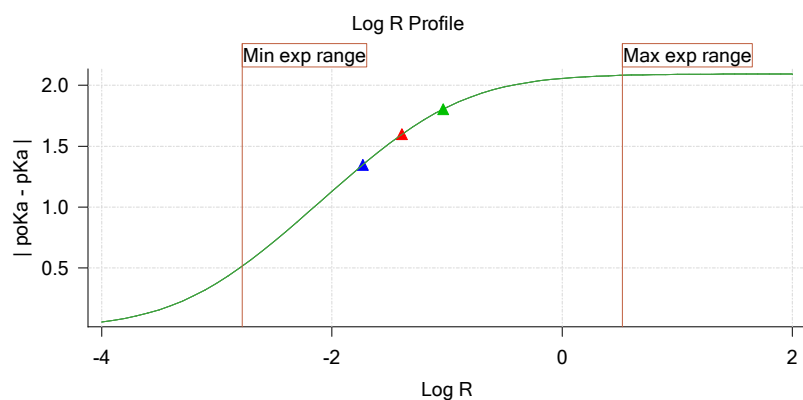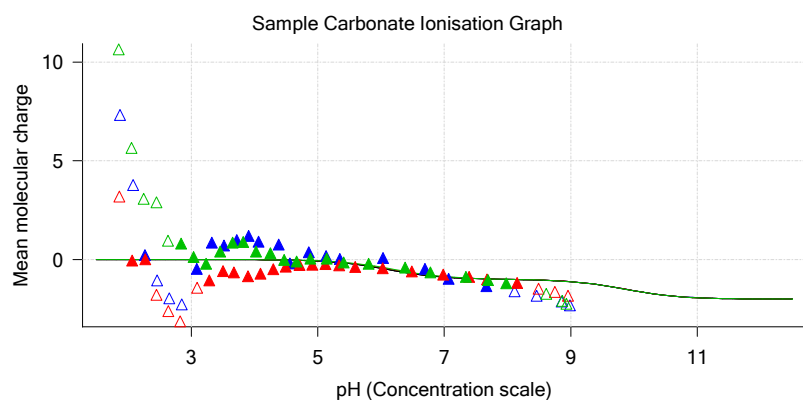

Sample name: **M09\_octanol**  
 Assay name: **pH-metric high logP**  
 Assay ID: **18C-03001**  
 Filename: **C:\Sirius\_T3\Mehtap\20180302\_exp29\_logP\_T3-2\18C-03001\_M09\_octanol\_pH-metric high logP.t3r**

Experiment start time: **3/3/2018 12:18:26 AM**  
 Analyst: **Pion**  
 Instrument ID: **T312060**

## Graphs (continued)

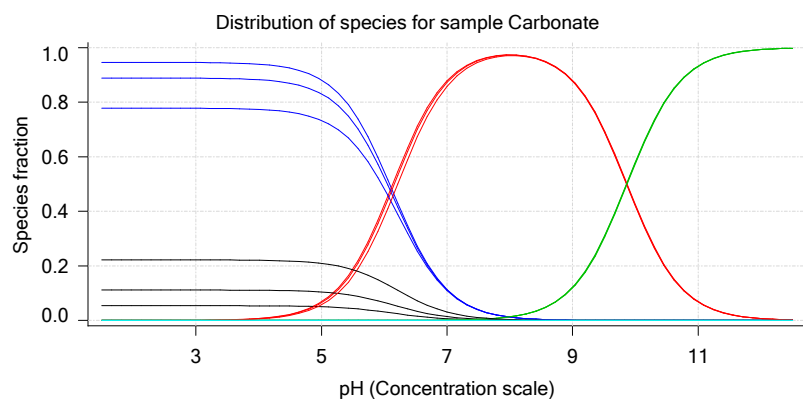

Sample name: **M09\_octanol**  
 Assay name: **pH-metric high logP**  
 Assay ID: **18C-03001**  
 Filename: **C:\Sirius\_T3\Mehtap\20180302\_exp29\_logP\_T3-2\18C-03001\_M09\_octanol\_pH-metric high logP.t3r**

Experiment start time: **3/3/2018 12:18:26 AM**  
 Analyst: **Pion**  
 Instrument ID: **T312060**

## pH-metric high logP Titration 1 of 3 18C-03001 Points 1 to 25

### Overall results

RMSD 0.656  
 Average ionic strength 0.158 M  
 Average temperature 25.0°C  
 Partition ratio 0.0185 : 1  
 Analyte concentration range 2340.8 µM to 2417.9 µM  
 Total points considered 16 of 25

### Warnings and errors

Errors None  
 Warnings None

### Four-Plus parameters

Alpha 0.111 3/3/2018 12:18:25 AM C:\Sirius\_T3\HCl18C02.t3r  
 S 0.9988 3/3/2018 12:18:25 AM C:\Sirius\_T3\HCl18C02.t3r  
 jH 1.0 3/3/2018 12:18:25 AM C:\Sirius\_T3\HCl18C02.t3r  
 jOH -0.8 3/3/2018 12:18:25 AM C:\Sirius\_T3\HCl18C02.t3r

### Titrants

0.50 M HCl 0.999058 3/3/2018 12:18:25 AM C:\Sirius\_T3\HCl18C02.t3r  
 0.50 M KOH 0.999845 3/3/2018 12:18:26 AM C:\Sirius\_T3\KOH18B27.t3r

### Sample

M09\_octanol concentration factor 1.208  
 M09\_octanol stoichiometry 1.000  
 Chloride stoichiometry 1.000  
 Base pKa 1 5.37  
 logP (XH +) 0.87  
 logP (neutral X) 3.09

### Sample graphs

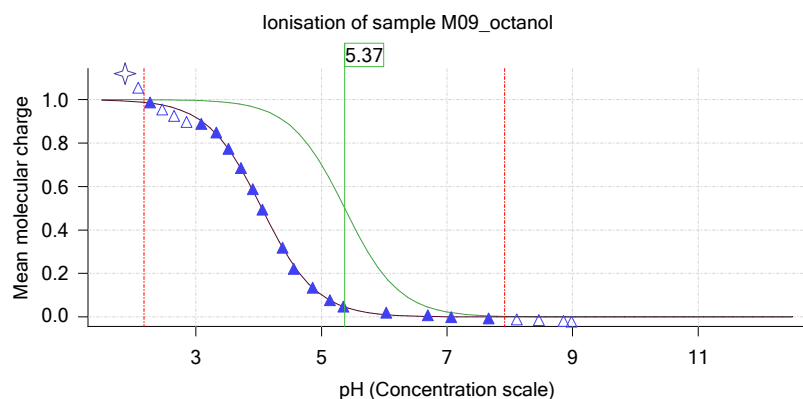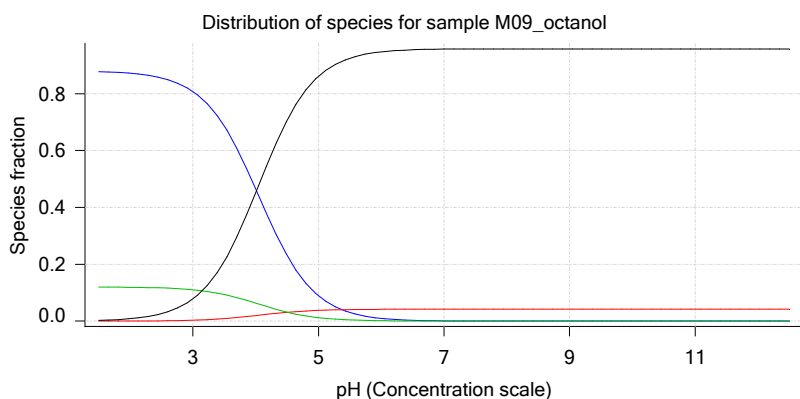

Sample name: **M09\_octanol**  
 Assay name: **pH-metric high logP**  
 Assay ID: **18C-03001**  
 Filename: **C:\Sirius\_T3\Mehtap\20180302\_exp29\_logP\_T3-2\18C-03001\_M09\_octanol\_pH-metric high logP.t3r**

Experiment start time: **3/3/2018 12:18:26 AM**  
 Analyst: **Pion**  
 Instrument ID: **T312060**

## Sample graphs (continued)

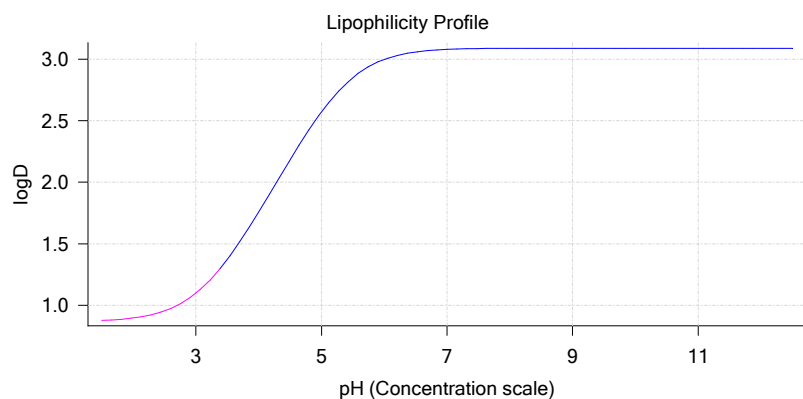

## Sample logD and percent species

| pH     | M09_octanol<br>logD | M09_octanol<br>M09_octanolH | M09_octanol<br>M09_octanolH | M09_octanol<br>M09_octanolH* | M09_octanol<br>M09_octanol* | Comment |
|--------|---------------------|-----------------------------|-----------------------------|------------------------------|-----------------------------|---------|
| 1.000  | 0.87                | 87.91 %                     | 0.00 %                      | 12.00 %                      | 0.09 %                      |         |
| 1.200  | 0.87                | 87.86 %                     | 0.01 %                      | 12.00 %                      | 0.13 %                      |         |
| 2.000  | 0.90                | 87.21 %                     | 0.04 %                      | 11.91 %                      | 0.84 %                      |         |
| 3.000  | 1.10                | 80.80 %                     | 0.34 %                      | 11.03 %                      | 7.83 %                      |         |
| 4.000  | 1.76                | 46.56 %                     | 1.99 %                      | 6.36 %                       | 45.10 %                     |         |
| 5.000  | 2.57                | 8.89 %                      | 3.79 %                      | 1.21 %                       | 86.10 %                     |         |
| 6.000  | 3.00                | 0.98 %                      | 4.17 %                      | 0.13 %                       | 94.72 %                     |         |
| 6.500  | 3.06                | 0.31 %                      | 4.20 %                      | 0.04 %                       | 95.44 %                     |         |
| 7.000  | 3.08                | 0.10 %                      | 4.21 %                      | 0.01 %                       | 95.67 %                     |         |
| 7.400  | 3.08                | 0.04 %                      | 4.22 %                      | 0.01 %                       | 95.74 %                     |         |
| 8.000  | 3.09                | 0.01 %                      | 4.22 %                      | 0.00 %                       | 95.77 %                     |         |
| 9.000  | 3.09                | 0.00 %                      | 4.22 %                      | 0.00 %                       | 95.78 %                     |         |
| 10.000 | 3.09                | 0.00 %                      | 4.22 %                      | 0.00 %                       | 95.78 %                     |         |
| 11.000 | 3.09                | 0.00 %                      | 4.22 %                      | 0.00 %                       | 95.78 %                     |         |
| 12.000 | 3.09                | 0.00 %                      | 4.22 %                      | 0.00 %                       | 95.78 %                     |         |

## Carbonate and acidity

Carbonate 0.051 mM  
 Acidity error -0.658 mM

## Other graphs

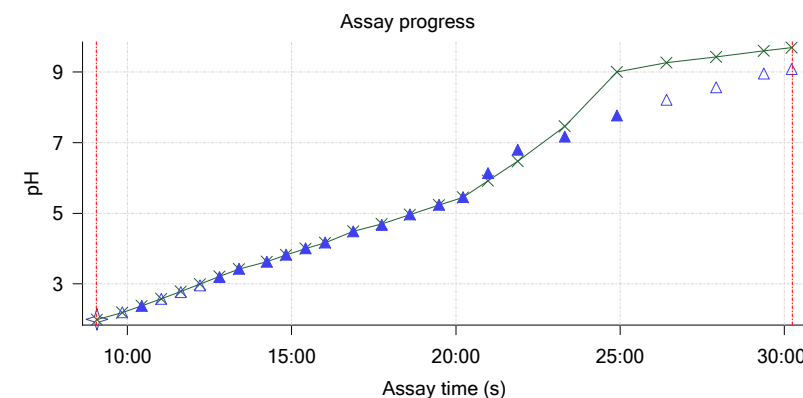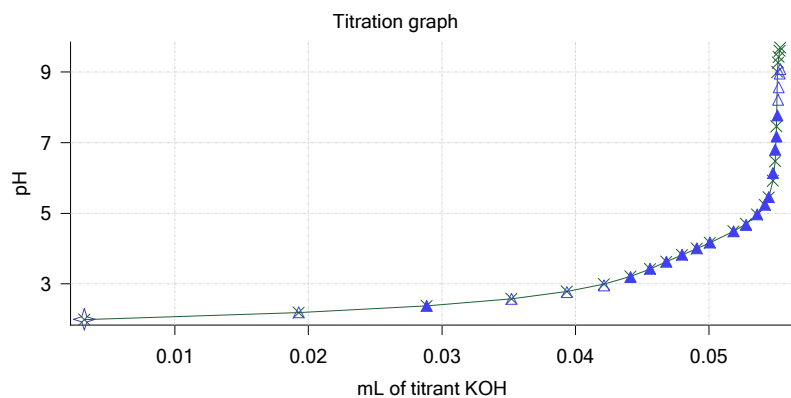

Sample name: **M09\_octanol**  
 Assay name: **pH-metric high logP**  
 Assay ID: **18C-03001**  
 Filename: **C:\Sirius\_T3\Mehtap\20180302\_exp29\_logP\_T3-2\18C-03001\_M09\_octanol\_pH-metric high logP.t3r**

Experiment start time: **3/3/2018 12:18:26 AM**  
 Analyst: **Pion**  
 Instrument ID: **T312060**

## Other graphs (continued)

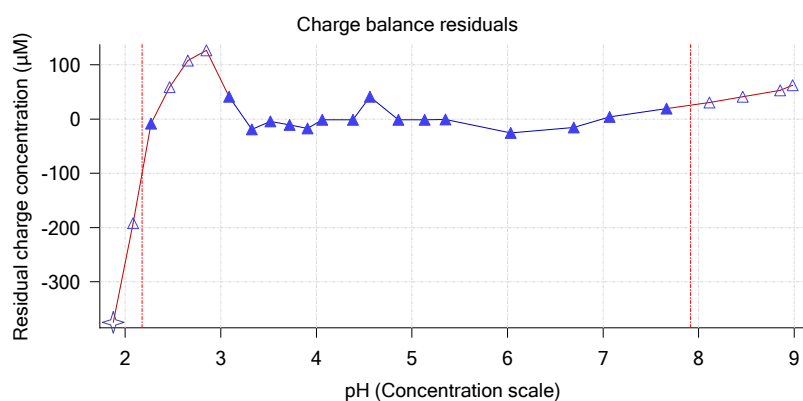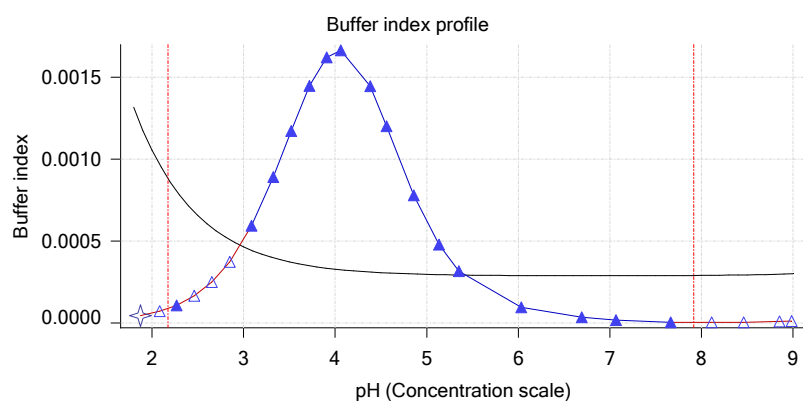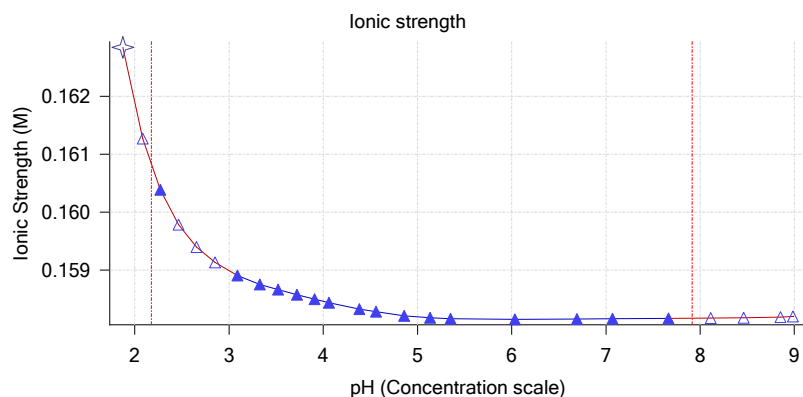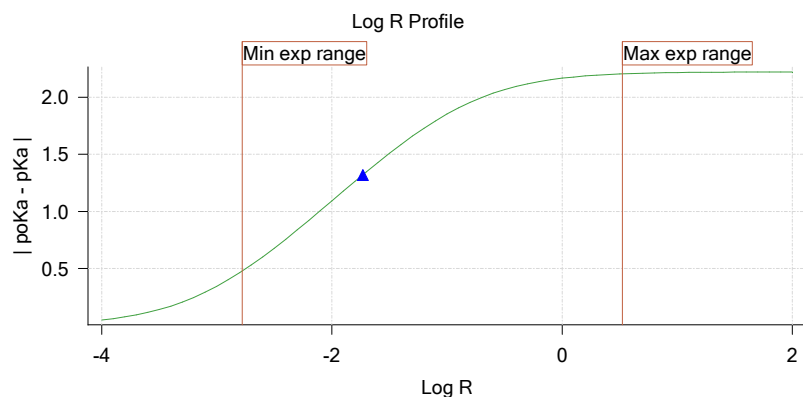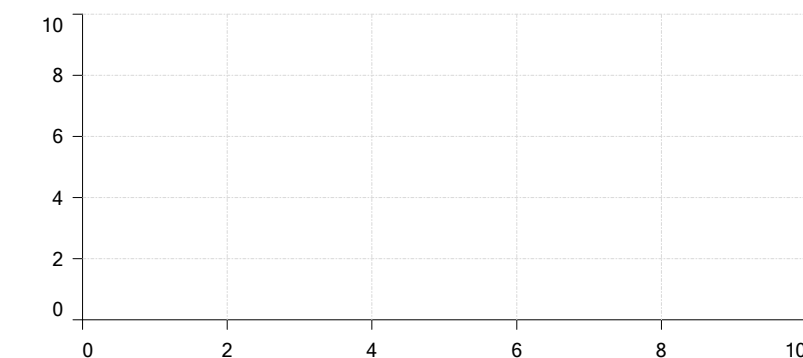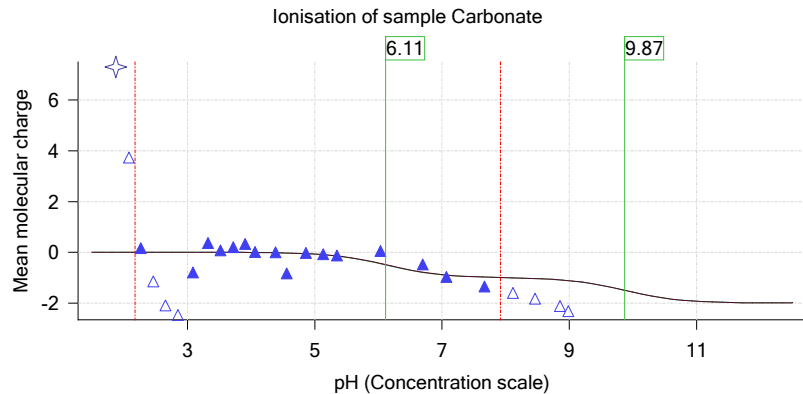

Sample name: **M09\_octanol**  
 Assay name: **pH-metric high logP**  
 Assay ID: **18C-03001**  
 Filename: **C:\Sirius\_T3\Mehtap\20180302\_exp29\_logP\_T3-2\18C-03001\_M09\_octanol\_pH-metric high logP.t3r**

Experiment start time: **3/3/2018 12:18:26 AM**  
 Analyst: **Pion**  
 Instrument ID: **T312060**

## pH-metric high logP Titration 2 of 3 18C-03001 Points 26 to 53

### Overall results

RMSD 0.344  
 Average ionic strength 0.165 M  
 Average temperature 25.0°C  
 Partition ratio 0.0407 : 1  
 Analyte concentration range 2140.2 µM to 2210.0 µM  
 Total points considered 20 of 28

### Warnings and errors

Errors None  
 Warnings None

### Four-Plus parameters

Alpha 0.111 3/3/2018 12:18:25 AM C:\Sirius\_T3\HCl18C02.t3r  
 S 0.9988 3/3/2018 12:18:25 AM C:\Sirius\_T3\HCl18C02.t3r  
 jH 1.0 3/3/2018 12:18:25 AM C:\Sirius\_T3\HCl18C02.t3r  
 jOH -0.8 3/3/2018 12:18:25 AM C:\Sirius\_T3\HCl18C02.t3r

### Titrants

0.50 M HCl 0.999058 3/3/2018 12:18:25 AM C:\Sirius\_T3\HCl18C02.t3r  
 0.50 M KOH 0.999845 3/3/2018 12:18:26 AM C:\Sirius\_T3\KOH18B27.t3r

### Sample

M09\_octanol concentration factor 1.218  
 M09\_octanol stoichiometry 1.000  
 Chloride stoichiometry 1.000  
 Base pKa 1 5.37  
 logP (XH +) 0.73  
 logP (neutral X) 3.12

### Sample graphs

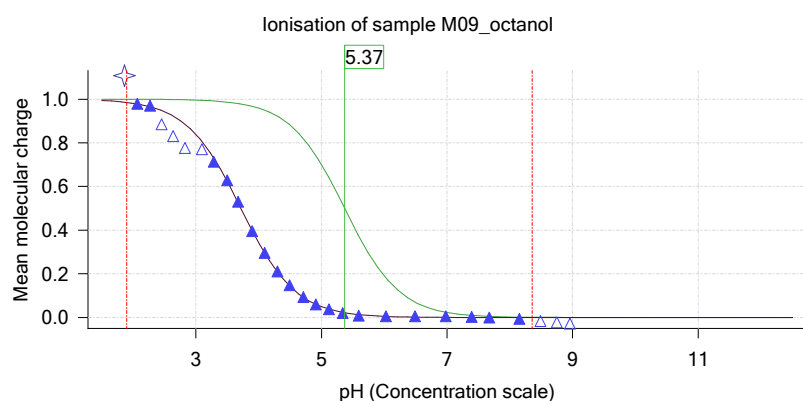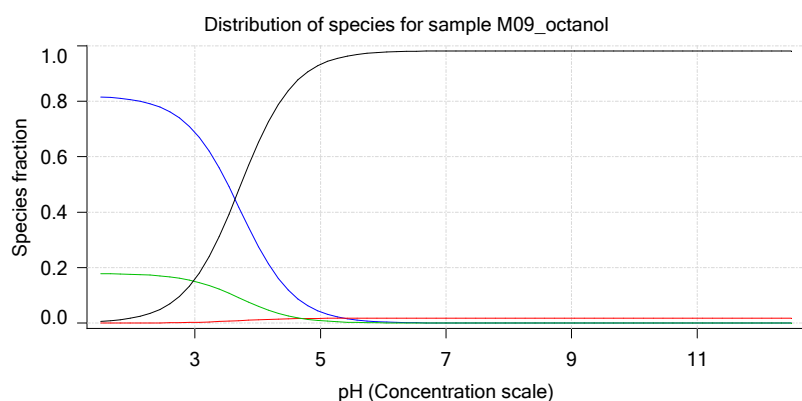

Sample name: **M09\_octanol**  
 Assay name: **pH-metric high logP**  
 Assay ID: **18C-03001**  
 Filename: **C:\Sirius\_T3\Mehtap\20180302\_exp29\_logP\_T3-2\18C-03001\_M09\_octanol\_pH-metric high logP.t3r**

Experiment start time: **3/3/2018 12:18:26 AM**  
 Analyst: **Pion**  
 Instrument ID: **T312060**

## Sample graphs (continued)

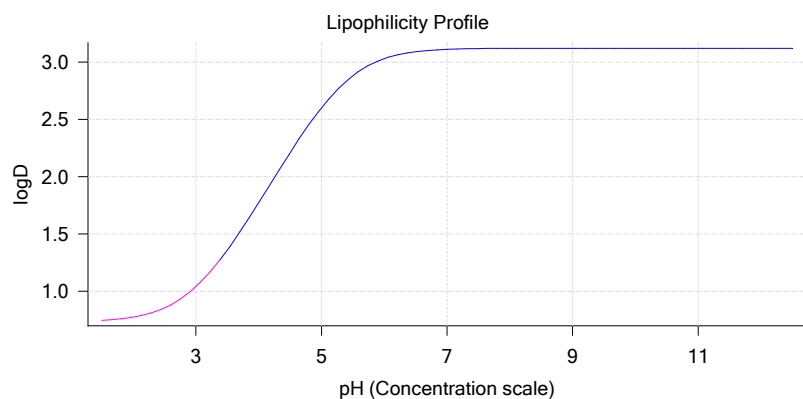

## Sample logD and percent species

| pH     | M09_octanol<br>logD | M09_octanol<br>M09_octanolH | M09_octanol<br>M09_octanolH | M09_octanol<br>M09_octanolH* | M09_octanol<br>M09_octanol* | Comment |
|--------|---------------------|-----------------------------|-----------------------------|------------------------------|-----------------------------|---------|
| 1.000  | 0.74                | 81.90 %                     | 0.00 %                      | 17.91 %                      | 0.19 %                      |         |
| 1.200  | 0.74                | 81.80 %                     | 0.01 %                      | 17.89 %                      | 0.30 %                      |         |
| 2.000  | 0.77                | 80.51 %                     | 0.03 %                      | 17.61 %                      | 1.85 %                      |         |
| 3.000  | 1.04                | 68.86 %                     | 0.29 %                      | 15.06 %                      | 15.78 %                     |         |
| 4.000  | 1.77                | 28.14 %                     | 1.20 %                      | 6.16 %                       | 64.50 %                     |         |
| 5.000  | 2.60                | 4.07 %                      | 1.74 %                      | 0.89 %                       | 93.30 %                     |         |
| 6.000  | 3.03                | 0.43 %                      | 1.82 %                      | 0.09 %                       | 97.66 %                     |         |
| 6.500  | 3.09                | 0.14 %                      | 1.82 %                      | 0.03 %                       | 98.01 %                     |         |
| 7.000  | 3.11                | 0.04 %                      | 1.83 %                      | 0.01 %                       | 98.12 %                     |         |
| 7.400  | 3.12                | 0.02 %                      | 1.83 %                      | 0.00 %                       | 98.15 %                     |         |
| 8.000  | 3.12                | 0.00 %                      | 1.83 %                      | 0.00 %                       | 98.17 %                     |         |
| 9.000  | 3.12                | 0.00 %                      | 1.83 %                      | 0.00 %                       | 98.17 %                     |         |
| 10.000 | 3.12                | 0.00 %                      | 1.83 %                      | 0.00 %                       | 98.17 %                     |         |
| 11.000 | 3.12                | 0.00 %                      | 1.83 %                      | 0.00 %                       | 98.17 %                     |         |
| 12.000 | 3.12                | 0.00 %                      | 1.83 %                      | 0.00 %                       | 98.17 %                     |         |

## Carbonate and acidity

Carbonate 0.106 mM  
 Acidity error -0.768 mM

## Other graphs

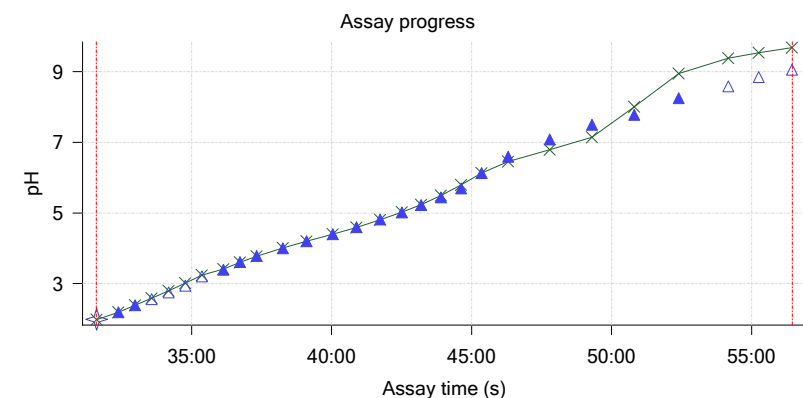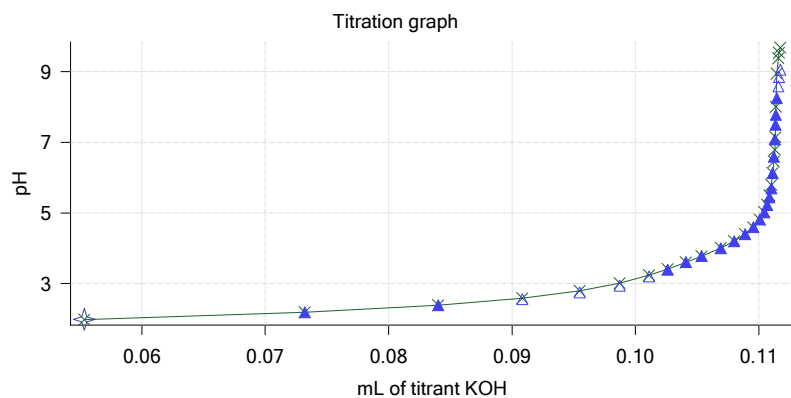



Sample name: **M09\_octanol**  
 Assay name: **pH-metric high logP**  
 Assay ID: **18C-03001**  
 Filename: **C:\Sirius\_T3\Mehtap\20180302\_exp29\_logP\_T3-2\18C-03001\_M09\_octanol\_pH-metric high logP.t3r**

Experiment start time: **3/3/2018 12:18:26 AM**  
 Analyst: **Pion**  
 Instrument ID: **T312060**

## Other graphs (continued)

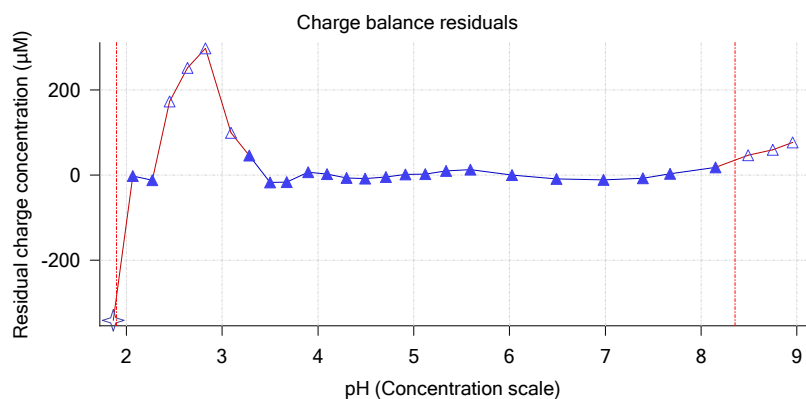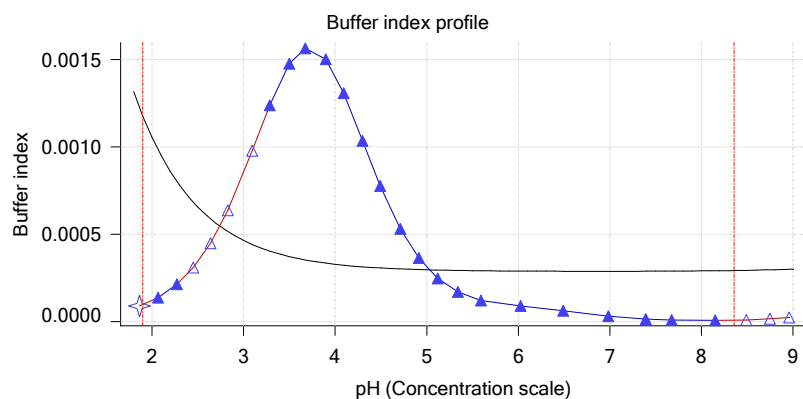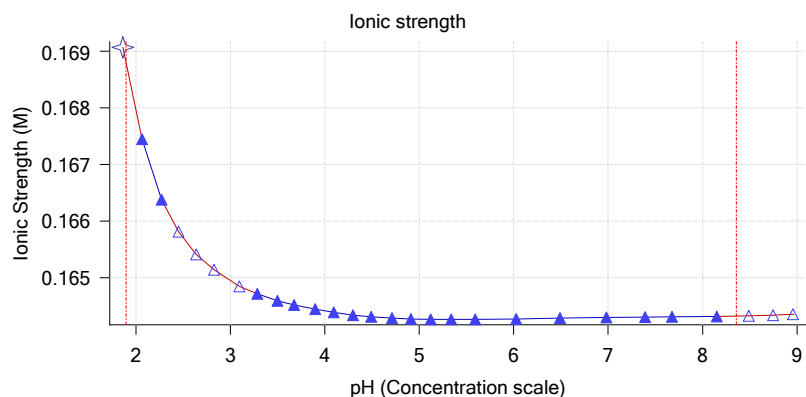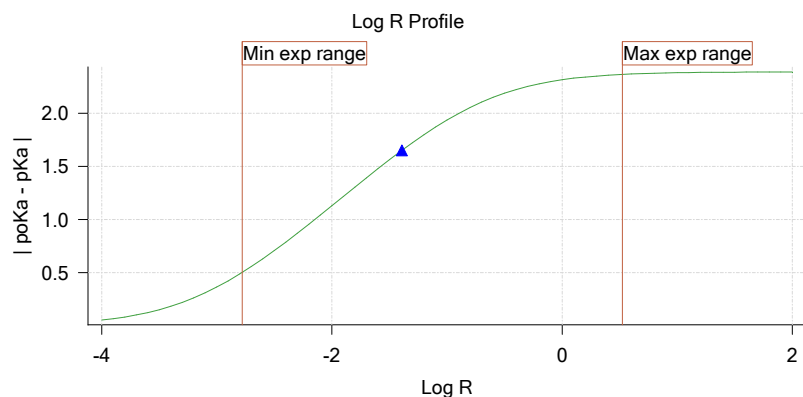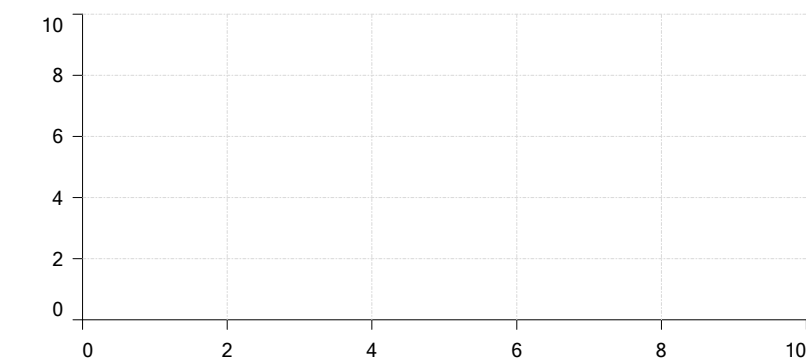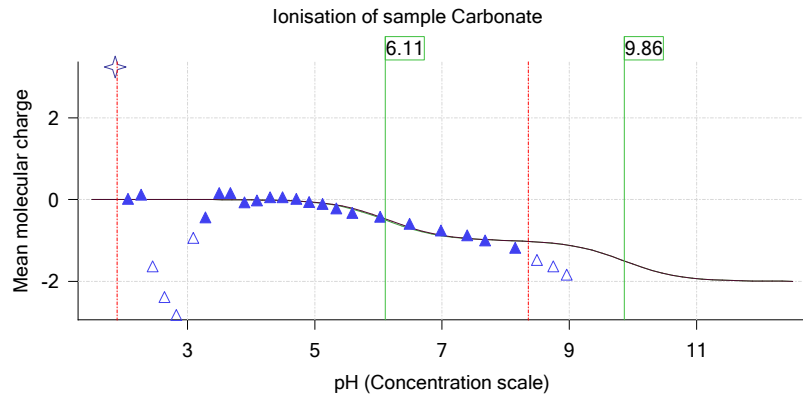

Sample name: **M09\_octanol**  
 Assay name: **pH-metric high logP**  
 Assay ID: **18C-03001**  
 Filename: **C:\Sirius\_T3\Mehtap\20180302\_exp29\_logP\_T3-2\18C-03001\_M09\_octanol\_pH-metric high logP.t3r**

Experiment start time: **3/3/2018 12:18:26 AM**  
 Analyst: **Pion**  
 Instrument ID: **T312060**

pH-metric high logP Titration 3 of 3 18C-03001 Points 54 to 80

## Overall results

RMSD 0.436  
 Average ionic strength 0.170 M  
 Average temperature 25.0°C  
 Partition ratio 0.0924 : 1  
 Analyte concentration range 1903.5 µM to 1963.3 µM  
 Total points considered 19 of 27

## Warnings and errors

Errors None  
 Warnings None

## Four-Plus parameters

Alpha 0.111 3/3/2018 12:18:25 AM C:\Sirius\_T3\HCl18C02.t3r  
 S 0.9988 3/3/2018 12:18:25 AM C:\Sirius\_T3\HCl18C02.t3r  
 jH 1.0 3/3/2018 12:18:25 AM C:\Sirius\_T3\HCl18C02.t3r  
 jOH -0.8 3/3/2018 12:18:25 AM C:\Sirius\_T3\HCl18C02.t3r

## Titrants

0.50 M HCl 0.999058 3/3/2018 12:18:25 AM C:\Sirius\_T3\HCl18C02.t3r  
 0.50 M KOH 0.999845 3/3/2018 12:18:26 AM C:\Sirius\_T3\KOH18B27.t3r

## Sample

M09\_octanol concentration factor 1.072  
 M09\_octanol stoichiometry 1.000  
 Chloride stoichiometry 1.000  
 Base pKa 1 5.37  
 logP (XH +) 0.75  
 logP (neutral X) 2.98

## Sample graphs

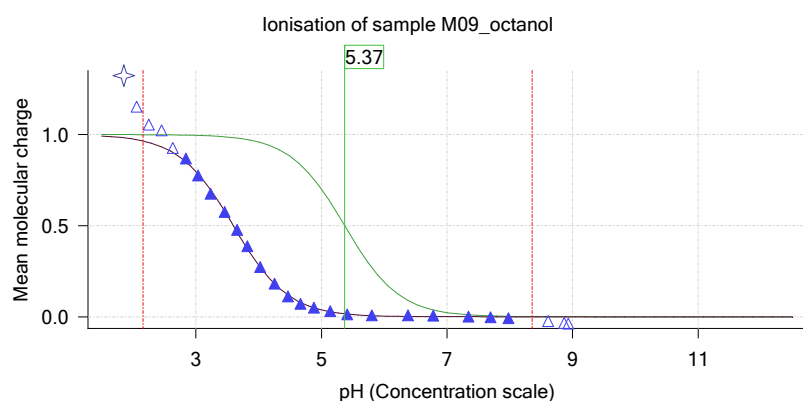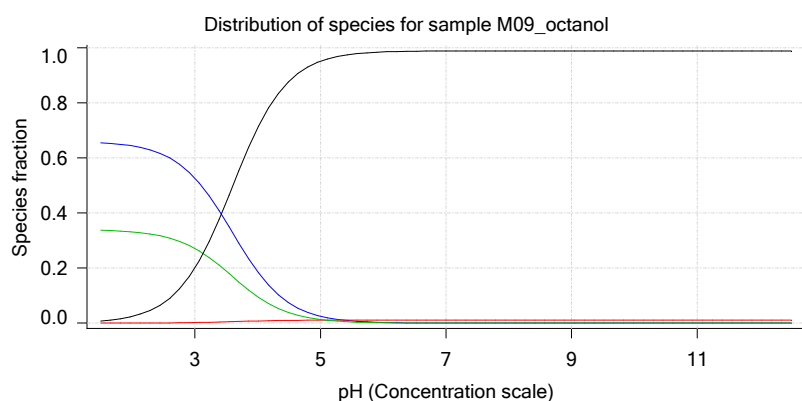

Sample name: **M09\_octanol**  
Assay name: **pH-metric high logP**  
Assay ID: **18C-03001**  
Filename: **C:\Sirius\_T3\Mehtap\20180302\_exp29\_logP\_T3-2\18C-03001\_M09\_octanol\_pH-metric high logP.t3r**

Experiment start time: **3/3/2018 12:18:26 AM**  
Analyst: **Pion**  
Instrument ID: **T312060**

## Sample graphs (continued)

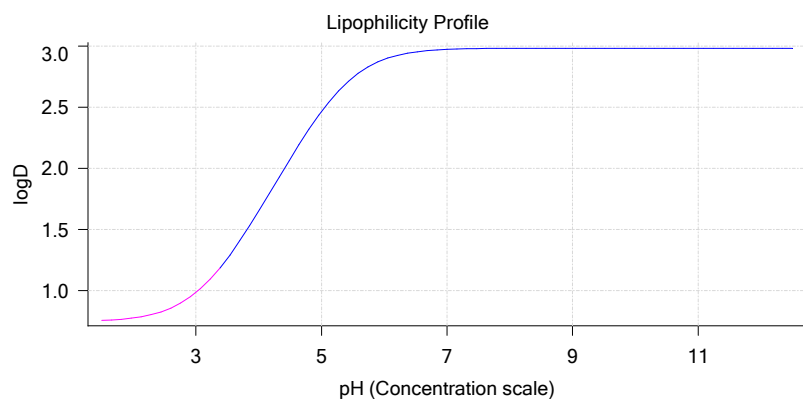

## Sample logD and percent species

| pH     | M09_octanol<br>logD | M09_octanol<br>M09_octanolH | M09_octanol<br>M09_octanolH | M09_octanol<br>M09_octanolH* | M09_octanol<br>M09_octanol* | Comment    |
|--------|---------------------|-----------------------------|-----------------------------|------------------------------|-----------------------------|------------|
| 1.000  | 0.75                | 65.86 %                     | 0.00 %                      | 33.89 %                      | 0.25 %                      | Stomach pH |
| 1.200  | 0.75                | 65.76 %                     | 0.00 %                      | 33.84 %                      | 0.40 %                      |            |
| 2.000  | 0.78                | 64.40 %                     | 0.03 %                      | 33.13 %                      | 2.44 %                      |            |
| 3.000  | 0.98                | 52.69 %                     | 0.22 %                      | 27.11 %                      | 19.97 %                     |            |
| 4.000  | 1.65                | 18.70 %                     | 0.80 %                      | 9.62 %                       | 70.88 %                     |            |
| 5.000  | 2.46                | 2.51 %                      | 1.07 %                      | 1.29 %                       | 95.13 %                     | Blood pH   |
| 6.000  | 2.89                | 0.26 %                      | 1.11 %                      | 0.13 %                       | 98.50 %                     |            |
| 6.500  | 2.95                | 0.08 %                      | 1.11 %                      | 0.04 %                       | 98.76 %                     |            |
| 7.000  | 2.97                | 0.03 %                      | 1.11 %                      | 0.01 %                       | 98.85 %                     |            |
| 7.400  | 2.98                | 0.01 %                      | 1.11 %                      | 0.01 %                       | 98.87 %                     |            |
| 8.000  | 2.98                | 0.00 %                      | 1.11 %                      | 0.00 %                       | 98.88 %                     |            |
| 9.000  | 2.98                | 0.00 %                      | 1.11 %                      | 0.00 %                       | 98.89 %                     |            |
| 10.000 | 2.98                | 0.00 %                      | 1.11 %                      | 0.00 %                       | 98.89 %                     |            |
| 11.000 | 2.98                | 0.00 %                      | 1.11 %                      | 0.00 %                       | 98.89 %                     |            |
| 12.000 | 2.98                | 0.00 %                      | 1.11 %                      | 0.00 %                       | 98.89 %                     |            |

## Carbonate and acidity

Carbonate 0.074 mM  
Acidity error -0.322 mM

## Other graphs

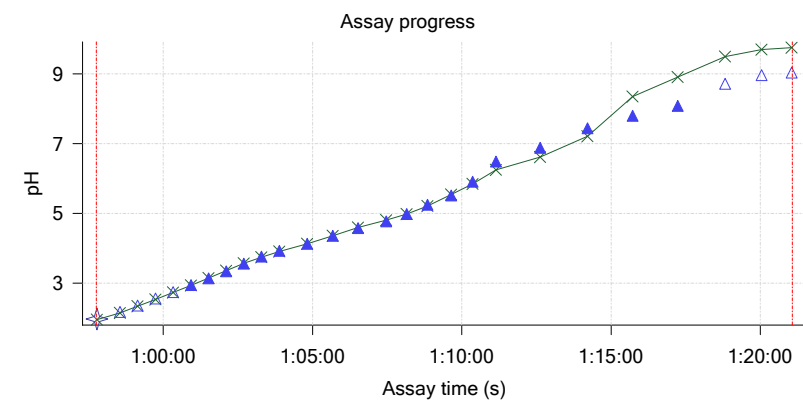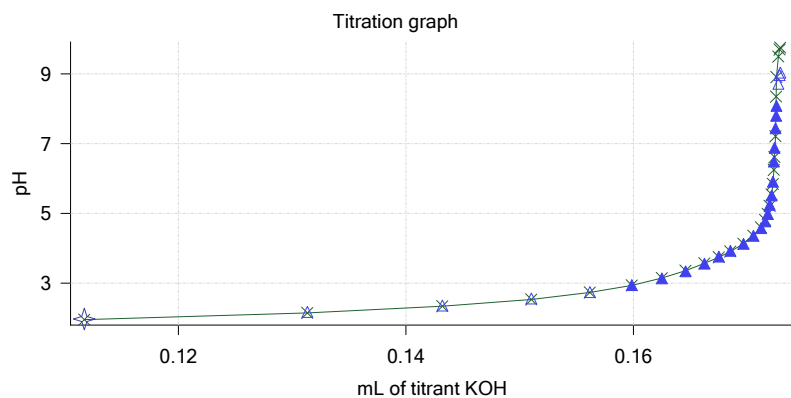

Sample name: **M09\_octanol**  
 Assay name: **pH-metric high logP**  
 Assay ID: **18C-03001**  
 Filename: **C:\Sirius\_T3\Mehtap\20180302\_exp29\_logP\_T3-2\18C-03001\_M09\_octanol\_pH-metric high logP.t3r**

Experiment start time: **3/3/2018 12:18:26 AM**  
 Analyst: **Pion**  
 Instrument ID: **T312060**

## Other graphs (continued)

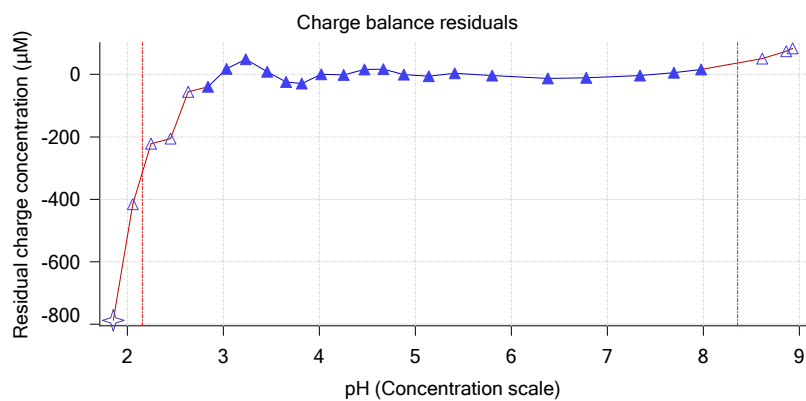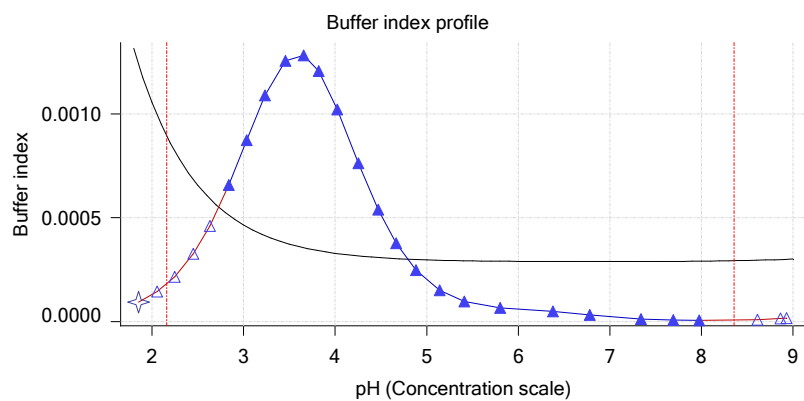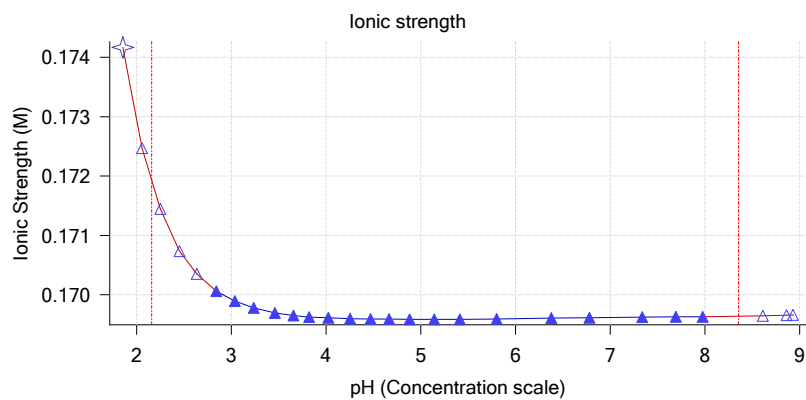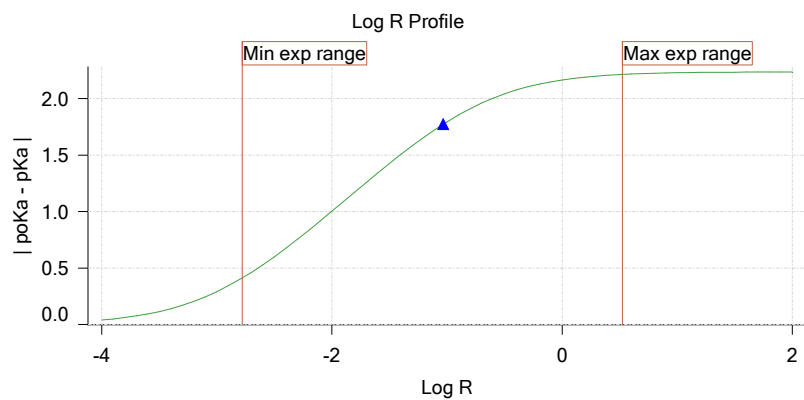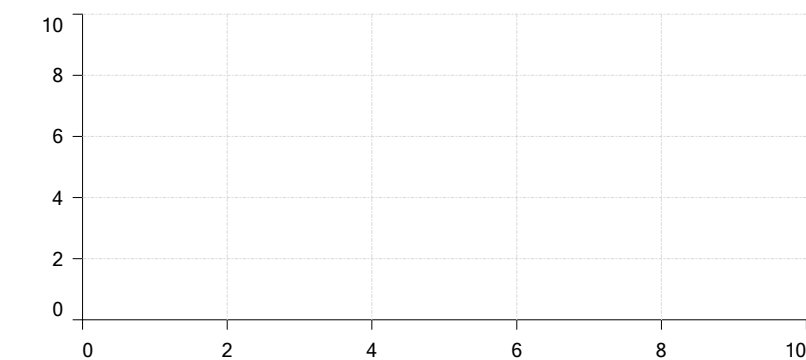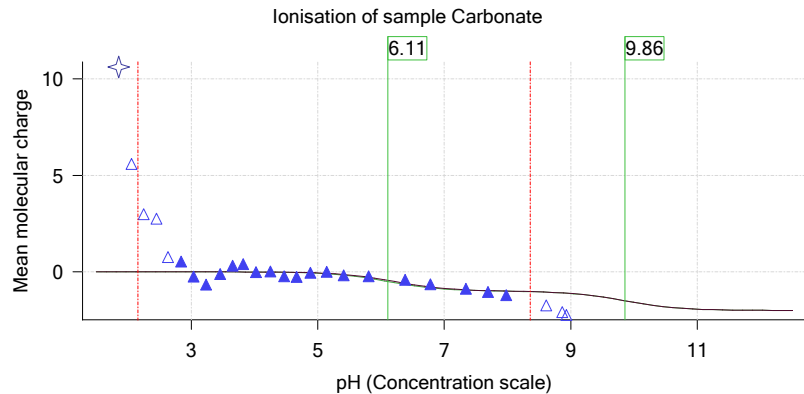

Sample name: **M09\_octanol**  
 Assay name: **pH-metric high logP**  
 Assay ID: **18C-03001**  
 Filename: **C:\Sirius\_T3\Mehtap\20180302\_exp29\_logP\_T3-2\18C-03001\_M09\_octanol\_pH-metric high logP.t3r**

Experiment start time: **3/3/2018 12:18:26 AM**  
 Analyst: **Pion**  
 Instrument ID: **T312060**

## Assay Model

| Settings                          | Value        | Date/Time changed    | Imported from           |
|-----------------------------------|--------------|----------------------|-------------------------|
| Sample name                       | M09_octanol  | 2/27/2018 4:56:17 PM | User entered value      |
| Sample by                         | Weight       |                      | Default value           |
| Sample weight                     | 0.001100 g   | 3/2/2018 5:08:41 PM  | User entered value      |
| Formula weight                    | 287.74 g/mol | 2/27/2018 4:45:45 PM | User entered value      |
| Solubility                        | Unknown      |                      | Default value           |
| Molecular weight                  | 251.28       | 2/27/2018 4:45:45 PM | User entered value      |
| Individual pKa ionic environments | No           |                      | Default value           |
| Number of pKas                    | 1            | 2/27/2018 4:45:45 PM | User entered value      |
| Sample is a                       | Base         | 2/27/2018 4:45:45 PM | User entered value      |
| pKa 1                             | 5.37         | 2/27/2018 4:45:45 PM | User entered value      |
| logp (XH +)                       | 0.76         | 3/2/2018 3:27:23 PM  | User entered value      |
| logP (neutral X)                  | 3.27         | 3/2/2018 3:27:17 PM  | User entered value      |
| Stoichiometry                     | 1.00000      |                      | Default value           |
| Aprotic counterion name           | Chloride     |                      | From standards.xml file |
| Stoichiometry                     | 1.00         |                      | From standards.xml file |
| Charge per counterion             | -1           |                      | From standards.xml file |

## Events

| Time    | Event             | Water      | Acid       | Base       | Octanol    | pH    | dpH/dt   | pH R-squared | pH SD   | dpH/dt time         |
|---------|-------------------|------------|------------|------------|------------|-------|----------|--------------|---------|---------------------|
| 5:59.7  | Initial pH = 4.70 |            |            |            |            |       |          |              |         |                     |
| 9:04.4  | Data point 1      | 1.50000 mL | 0.04781 mL | 0.00322 mL | 0.03001 mL | 1.997 | 0.00021  | 0.00128      | 0.00028 | 10.0 s              |
| 9:50.6  | Data point 2      | 1.50000 mL | 0.04781 mL | 0.01929 mL | 0.03001 mL | 2.199 | -0.00807 | 0.15986      | 0.00100 | 10.0 s              |
| 10:26.3 | Data point 3      | 1.50000 mL | 0.04781 mL | 0.02886 mL | 0.03001 mL | 2.383 | -0.00750 | 0.76284      | 0.00042 | 10.0 s              |
| 11:01.9 | Data point 4      | 1.50000 mL | 0.04781 mL | 0.03521 mL | 0.03001 mL | 2.574 | -0.00115 | 0.21590      | 0.00012 | 10.0 s              |
| 11:37.4 | Data point 5      | 1.50000 mL | 0.04781 mL | 0.03935 mL | 0.03001 mL | 2.764 | -0.00311 | 0.44869      | 0.00023 | 10.0 s              |
| 12:12.9 | Data point 6      | 1.50000 mL | 0.04781 mL | 0.04214 mL | 0.03001 mL | 2.959 | 0.00347  | 0.05811      | 0.00071 | 10.0 s              |
| 12:48.4 | Data point 7      | 1.50000 mL | 0.04781 mL | 0.04412 mL | 0.03001 mL | 3.196 | -0.00193 | 0.10328      | 0.00030 | 10.0 s              |
| 13:23.8 | Data point 8      | 1.50000 mL | 0.04781 mL | 0.04558 mL | 0.03001 mL | 3.433 | -0.00576 | 0.33769      | 0.00049 | 10.0 s              |
| 14:14.7 | Data point 9      | 1.50000 mL | 0.04781 mL | 0.04680 mL | 0.03001 mL | 3.626 | 0.00424  | 0.07343      | 0.00077 | 10.0 s              |
| 14:50.2 | Data point 10     | 1.50000 mL | 0.04781 mL | 0.04798 mL | 0.03001 mL | 3.827 | -0.00743 | 0.22433      | 0.00078 | 10.0 s              |
| 15:25.6 | Data point 11     | 1.50000 mL | 0.04781 mL | 0.04908 mL | 0.03001 mL | 4.012 | -0.00611 | 0.18146      | 0.00071 | 10.0 s              |
| 16:01.0 | Data point 12     | 1.50000 mL | 0.04781 mL | 0.05007 mL | 0.03001 mL | 4.168 | 0.00689  | 0.18082      | 0.00080 | 10.5 s              |
| 16:52.5 | Data point 13     | 1.50000 mL | 0.04781 mL | 0.05183 mL | 0.03001 mL | 4.487 | 0.00440  | 0.05974      | 0.00089 | 11.0 s              |
| 17:44.4 | Data point 14     | 1.50000 mL | 0.04781 mL | 0.05278 mL | 0.03001 mL | 4.667 | -0.01155 | 0.70656      | 0.00068 | 11.0 s              |
| 18:36.3 | Data point 15     | 1.50000 mL | 0.04781 mL | 0.05362 mL | 0.03001 mL | 4.964 | -0.01372 | 0.57218      | 0.00090 | 12.0 s              |
| 19:29.2 | Data point 16     | 1.50000 mL | 0.04781 mL | 0.05419 mL | 0.03001 mL | 5.238 | -0.01399 | 0.63621      | 0.00087 | 13.5 s              |
| 20:13.3 | Data point 17     | 1.50000 mL | 0.04781 mL | 0.05447 mL | 0.03001 mL | 5.454 | -0.01800 | 0.81818      | 0.00098 | 14.5 s              |
| 20:58.4 | Data point 18     | 1.50000 mL | 0.04781 mL | 0.05480 mL | 0.03001 mL | 6.136 | -0.01947 | 0.94607      | 0.00099 | 24.0 s              |
| 21:53.1 | Data point 19     | 1.50000 mL | 0.04781 mL | 0.05496 mL | 0.03001 mL | 6.796 | -0.01955 | 0.98614      | 0.00097 | 55.0 s              |
| 23:18.9 | Data point 20     | 1.50000 mL | 0.04781 mL | 0.05506 mL | 0.03001 mL | 7.170 | -0.02220 | 0.96314      | 0.00112 | Timed out at 59.5 s |
| 24:54.4 | Data point 21     | 1.50000 mL | 0.04781 mL | 0.05513 mL | 0.03001 mL | 7.765 | -0.05086 | 0.98182      | 0.00253 | Timed out at 59.5 s |
| 26:24.9 | Data point 22     | 1.50000 mL | 0.04781 mL | 0.05517 mL | 0.03001 mL | 8.213 | -0.03736 | 0.98947      | 0.00186 | Timed out at 59.5 s |
| 27:55.4 | Data point 23     | 1.50000 mL | 0.04781 mL | 0.05522 mL | 0.03001 mL | 8.561 | -0.01843 | 0.94257      | 0.00094 | 51.0 s              |
| 29:22.2 | Data point 24     | 1.50000 mL | 0.04781 mL | 0.05529 mL | 0.03001 mL | 8.953 | -0.01480 | 0.58788      | 0.00095 | 20.5 s              |
| 30:13.4 | Data point 25     | 1.50000 mL | 0.04781 mL | 0.05534 mL | 0.03001 mL | 9.083 | -0.01975 | 0.98237      | 0.00098 | 24.0 s              |
| 31:36.5 | Data point 26     | 1.50000 mL | 0.10442 mL | 0.05534 mL | 0.07001 mL | 1.986 | -0.00842 | 0.45051      | 0.00062 | 10.0 s              |
| 32:22.8 | Data point 27     | 1.50000 mL | 0.10442 mL | 0.07321 mL | 0.07001 mL | 2.184 | 0.00425  | 0.08074      | 0.00074 | 10.0 s              |
| 32:58.4 | Data point 28     | 1.50000 mL | 0.10442 mL | 0.08401 mL | 0.07001 mL | 2.386 | -0.00574 | 0.55446      | 0.00038 | 10.5 s              |
| 33:34.5 | Data point 29     | 1.50000 mL | 0.10442 mL | 0.09083 mL | 0.07001 mL | 2.563 | -0.00261 | 0.29606      | 0.00024 | 10.5 s              |
| 34:10.6 | Data point 30     | 1.50000 mL | 0.10442 mL | 0.09548 mL | 0.07001 mL | 2.748 | -0.00851 | 0.22823      | 0.00088 | 10.0 s              |
| 34:46.1 | Data point 31     | 1.50000 mL | 0.10442 mL | 0.09873 mL | 0.07001 mL | 2.936 | -0.00490 | 0.63259      | 0.00030 | 10.0 s              |
| 35:21.6 | Data point 32     | 1.50000 mL | 0.10442 mL | 0.10111 mL | 0.07001 mL | 3.202 | 0.00315  | 0.37649      | 0.00025 | 10.5 s              |
| 36:07.9 | Data point 33     | 1.50000 mL | 0.10442 mL | 0.10261 mL | 0.07001 mL | 3.392 | -0.00411 | 0.37428      | 0.00033 | 10.0 s              |

Sample name: **M09\_octanol**  
 Assay name: **pH-metric high logP**  
 Assay ID: **18C-03001**  
 Filename: **C:\Sirius\_T3\Mehtap\20180302\_exp29\_logP\_T3-2\18C-03001\_M09\_octanol\_pH-metric high logP.t3r**

Experiment start time: **3/3/2018 12:18:26 AM**  
 Analyst: **Pion**  
 Instrument ID: **T312060**

## Events (continued)

| Time      | Event         | Water      | Acid       | Base       | Octanol    | pH    | dpH/dt   | pH R-squared | pH SD   | dpH/dt time         |
|-----------|---------------|------------|------------|------------|------------|-------|----------|--------------|---------|---------------------|
| 36:43.4   | Data point 34 | 1.50000 mL | 0.10442 mL | 0.10409 mL | 0.07001 mL | 3.607 | -0.00351 | 0.55022      | 0.00023 | 10.0 s              |
| 37:18.9   | Data point 35 | 1.50000 mL | 0.10442 mL | 0.10536 mL | 0.07001 mL | 3.781 | -0.00697 | 0.45953      | 0.00051 | 10.0 s              |
| 38:15.1   | Data point 36 | 1.50000 mL | 0.10442 mL | 0.10691 mL | 0.07001 mL | 4.005 | 0.00441  | 0.11123      | 0.00065 | 10.5 s              |
| 39:06.5   | Data point 37 | 1.50000 mL | 0.10442 mL | 0.10800 mL | 0.07001 mL | 4.199 | -0.00237 | 0.07863      | 0.00042 | 10.0 s              |
| 40:02.4   | Data point 38 | 1.50000 mL | 0.10442 mL | 0.10889 mL | 0.07001 mL | 4.404 | -0.00334 | 0.17918      | 0.00039 | 10.0 s              |
| 40:53.4   | Data point 39 | 1.50000 mL | 0.10442 mL | 0.10955 mL | 0.07001 mL | 4.598 | -0.01051 | 0.50833      | 0.00073 | 10.0 s              |
| 41:44.3   | Data point 40 | 1.50000 mL | 0.10442 mL | 0.11009 mL | 0.07001 mL | 4.816 | -0.00546 | 0.23998      | 0.00055 | 10.5 s              |
| 42:30.4   | Data point 41 | 1.50000 mL | 0.10442 mL | 0.11044 mL | 0.07001 mL | 5.018 | -0.00850 | 0.19854      | 0.00094 | 11.0 s              |
| 43:12.0   | Data point 42 | 1.50000 mL | 0.10442 mL | 0.11068 mL | 0.07001 mL | 5.225 | -0.01559 | 0.61445      | 0.00098 | 11.5 s              |
| 43:54.1   | Data point 43 | 1.50000 mL | 0.10442 mL | 0.11087 mL | 0.07001 mL | 5.444 | -0.01372 | 0.82414      | 0.00075 | 12.5 s              |
| 44:37.2   | Data point 44 | 1.50000 mL | 0.10442 mL | 0.11101 mL | 0.07001 mL | 5.696 | -0.01715 | 0.77305      | 0.00096 | 13.5 s              |
| 45:21.1   | Data point 45 | 1.50000 mL | 0.10442 mL | 0.11112 mL | 0.07001 mL | 6.130 | -0.01954 | 0.96881      | 0.00098 | 26.5 s              |
| 46:18.2   | Data point 46 | 1.50000 mL | 0.10442 mL | 0.11122 mL | 0.07001 mL | 6.592 | -0.01874 | 0.90315      | 0.00097 | 53.5 s              |
| 47:47.4   | Data point 47 | 1.50000 mL | 0.10442 mL | 0.11129 mL | 0.07001 mL | 7.084 | -0.04097 | 0.96909      | 0.00205 | Timed out at 59.5 s |
| 49:17.9   | Data point 48 | 1.50000 mL | 0.10442 mL | 0.11134 mL | 0.07001 mL | 7.495 | -0.05100 | 0.98620      | 0.00253 | Timed out at 59.5 s |
| 50:48.4   | Data point 49 | 1.50000 mL | 0.10442 mL | 0.11138 mL | 0.07001 mL | 7.776 | -0.04776 | 0.98456      | 0.00238 | Timed out at 59.5 s |
| 52:24.0   | Data point 50 | 1.50000 mL | 0.10442 mL | 0.11145 mL | 0.07001 mL | 8.250 | -0.03292 | 0.98852      | 0.00163 | Timed out at 59.5 s |
| 54:10.0   | Data point 51 | 1.50000 mL | 0.10442 mL | 0.11157 mL | 0.07001 mL | 8.590 | -0.00702 | 0.18474      | 0.00081 | 30.0 s              |
| 55:15.7   | Data point 52 | 1.50000 mL | 0.10442 mL | 0.11164 mL | 0.07001 mL | 8.848 | -0.01818 | 0.90325      | 0.00095 | 35.0 s              |
| 56:26.4   | Data point 53 | 1.50000 mL | 0.10442 mL | 0.11174 mL | 0.07001 mL | 9.055 | -0.01929 | 0.94782      | 0.00098 | 19.5 s              |
| 57:46.5   | Data point 54 | 1.50000 mL | 0.16536 mL | 0.11174 mL | 0.17001 mL | 1.977 | -0.01088 | 0.90338      | 0.00057 | 10.0 s              |
| 58:32.8   | Data point 55 | 1.50000 mL | 0.16536 mL | 0.13133 mL | 0.17001 mL | 2.175 | 0.01443  | 0.67056      | 0.00087 | 10.0 s              |
| 59:08.5   | Data point 56 | 1.50000 mL | 0.16536 mL | 0.14320 mL | 0.17001 mL | 2.362 | -0.00235 | 0.19580      | 0.00026 | 10.5 s              |
| 59:44.6   | Data point 57 | 1.50000 mL | 0.16536 mL | 0.15104 mL | 0.17001 mL | 2.563 | 0.00080  | 0.04198      | 0.00019 | 10.0 s              |
| 1:00:20.1 | Data point 58 | 1.50000 mL | 0.16536 mL | 0.15618 mL | 0.17001 mL | 2.744 | -0.00463 | 0.54415      | 0.00031 | 10.0 s              |
| 1:00:55.6 | Data point 59 | 1.50000 mL | 0.16536 mL | 0.15985 mL | 0.17001 mL | 2.949 | 0.00206  | 0.02453      | 0.00065 | 10.0 s              |
| 1:01:31.1 | Data point 60 | 1.50000 mL | 0.16536 mL | 0.16251 mL | 0.17001 mL | 3.143 | -0.00224 | 0.06525      | 0.00043 | 10.0 s              |
| 1:02:06.6 | Data point 61 | 1.50000 mL | 0.16536 mL | 0.16458 mL | 0.17001 mL | 3.342 | -0.00396 | 0.72084      | 0.00023 | 10.0 s              |
| 1:02:42.1 | Data point 62 | 1.50000 mL | 0.16536 mL | 0.16625 mL | 0.17001 mL | 3.564 | 0.00587  | 0.14501      | 0.00076 | 10.0 s              |
| 1:03:17.5 | Data point 63 | 1.50000 mL | 0.16536 mL | 0.16752 mL | 0.17001 mL | 3.761 | 0.00890  | 0.28722      | 0.00082 | 10.5 s              |
| 1:03:53.5 | Data point 64 | 1.50000 mL | 0.16536 mL | 0.16851 mL | 0.17001 mL | 3.925 | -0.00097 | 0.01530      | 0.00039 | 10.0 s              |
| 1:04:49.6 | Data point 65 | 1.50000 mL | 0.16536 mL | 0.16966 mL | 0.17001 mL | 4.128 | -0.00722 | 0.41676      | 0.00055 | 10.0 s              |
| 1:05:40.5 | Data point 66 | 1.50000 mL | 0.16536 mL | 0.17056 mL | 0.17001 mL | 4.359 | -0.00877 | 0.21278      | 0.00094 | 10.0 s              |
| 1:06:31.4 | Data point 67 | 1.50000 mL | 0.16536 mL | 0.17121 mL | 0.17001 mL | 4.575 | 0.01310  | 0.51315      | 0.00090 | 16.0 s              |
| 1:07:28.2 | Data point 68 | 1.50000 mL | 0.16536 mL | 0.17159 mL | 0.17001 mL | 4.771 | -0.01121 | 0.73701      | 0.00065 | 10.5 s              |
| 1:08:09.3 | Data point 69 | 1.50000 mL | 0.16536 mL | 0.17180 mL | 0.17001 mL | 4.986 | -0.00731 | 0.13298      | 0.00099 | 11.0 s              |
| 1:08:50.9 | Data point 70 | 1.50000 mL | 0.16536 mL | 0.17199 mL | 0.17001 mL | 5.245 | -0.00725 | 0.21815      | 0.00077 | 12.0 s              |
| 1:09:38.5 | Data point 71 | 1.50000 mL | 0.16536 mL | 0.17215 mL | 0.17001 mL | 5.515 | -0.01092 | 0.47619      | 0.00078 | 13.0 s              |
| 1:10:22.0 | Data point 72 | 1.50000 mL | 0.16536 mL | 0.17225 mL | 0.17001 mL | 5.905 | -0.01340 | 0.44094      | 0.00100 | 16.5 s              |
| 1:11:09.0 | Data point 73 | 1.50000 mL | 0.16536 mL | 0.17234 mL | 0.17001 mL | 6.483 | -0.01687 | 0.87993      | 0.00089 | 57.5 s              |
| 1:12:37.2 | Data point 74 | 1.50000 mL | 0.16536 mL | 0.17241 mL | 0.17001 mL | 6.882 | -0.04276 | 0.96454      | 0.00215 | Timed out at 59.5 s |
| 1:14:12.9 | Data point 75 | 1.50000 mL | 0.16536 mL | 0.17248 mL | 0.17001 mL | 7.441 | -0.07234 | 0.98643      | 0.00360 | Timed out at 59.5 s |
| 1:15:43.3 | Data point 76 | 1.50000 mL | 0.16536 mL | 0.17253 mL | 0.17001 mL | 7.793 | -0.06080 | 0.98083      | 0.00303 | Timed out at 59.5 s |
| 1:17:13.8 | Data point 77 | 1.50000 mL | 0.16536 mL | 0.17258 mL | 0.17001 mL | 8.077 | -0.04863 | 0.96800      | 0.00244 | Timed out at 59.5 s |
| 1:18:49.5 | Data point 78 | 1.50000 mL | 0.16536 mL | 0.17274 mL | 0.17001 mL | 8.712 | -0.01736 | 0.96206      | 0.00087 | 32.5 s              |
| 1:20:02.8 | Data point 79 | 1.50000 mL | 0.16536 mL | 0.17286 mL | 0.17001 mL | 8.963 | -0.01640 | 0.89684      | 0.00086 | 30.0 s              |
| 1:21:03.3 | Data point 80 | 1.50000 mL | 0.16536 mL | 0.17291 mL | 0.17001 mL | 9.029 | -0.00786 | 0.17453      | 0.00093 | 13.5 s              |
| 1:21:25.8 | Assay volumes | 1.50000 mL | 0.16536 mL | 0.17291 mL | 0.17001 mL |       |          |              |         |                     |

Sample name: **M09\_octanol**  
 Assay name: **pH-metric high logP**  
 Assay ID: **18C-03001**  
 Filename: **C:\Sirius\_T3\Mehtap\20180302\_exp29\_logP\_T3-2\18C-03001\_M09\_octanol\_pH-metric high logP.t3r**

Experiment start time: **3/3/2018 12:18:26 AM**  
 Analyst: **Pion**  
 Instrument ID: **T312060**

## Assay Settings

| Setting                             | Value              | Original Value | Date/Time changed | Imported from |
|-------------------------------------|--------------------|----------------|-------------------|---------------|
| <b>General Settings</b>             |                    |                |                   |               |
| Analyst name                        | Pion               |                |                   |               |
| <b>Standard Experiment Settings</b> |                    |                |                   |               |
| Number of titrations                | 3                  |                |                   |               |
| Minimum pH                          | 2.000              |                |                   |               |
| Maximum pH                          | 9.000              |                |                   |               |
| pH step between points of           | 0.200              |                |                   |               |
| Minimum titrant addition            | 0.00002 mL         |                |                   |               |
| Maximum titrant addition            | 0.10000 mL         |                |                   |               |
| Argon flow rate                     | 100%               |                |                   |               |
| Start titration using               | Cautious pH adjust |                |                   |               |
| <b>Advanced General Settings</b>    |                    |                |                   |               |
| Detect turbidity using              | None               |                |                   |               |
| Collect turbidity sensor data       | No                 |                |                   |               |
| Collect UV spectra                  | No                 |                |                   |               |
| Stir after titrant addition for     | 5 seconds          |                |                   |               |
| For titrant addition, stir at       | 10%                |                |                   |               |
| <b>Titration Pre-Dose</b>           |                    |                |                   |               |
| Titration pre-dose                  | None               |                |                   |               |
| <b>Assay Medium</b>                 |                    |                |                   |               |
| ISA water volume                    | 1.50 mL            |                |                   |               |
| Water added                         | Automatic          |                |                   |               |
| Partition solvent type              | Octanol            |                |                   |               |
| Partition volume                    | 0.030 mL           |                |                   |               |
| Partition solvent added             | Automatic          |                |                   |               |
| After partition addition, stir for  | 1 seconds          |                |                   |               |
| <b>Sample Sonication</b>            |                    |                |                   |               |
| Sonicate                            | Yes                |                |                   |               |
| Adjust pH for sonication            | No                 |                |                   |               |
| Sonicate for                        | 120 seconds        |                |                   |               |
| After sonication stir for           | 5 seconds          |                |                   |               |
| <b>Sample Dissolution</b>           |                    |                |                   |               |
| Perform a dissolution stage         | Yes                |                |                   |               |
| Adjust and hold pH for dissolution  | To start pH        |                |                   |               |
| Stir to dissolve for                | 120 seconds        |                |                   |               |
| For dissolution, stir at            | 10%                |                |                   |               |
| <b>Carbonate purge</b>              |                    |                |                   |               |
| Perform a carbonate purge           | No                 |                |                   |               |
| <b>Temperature Control</b>          |                    |                |                   |               |
| Wait for temperature                | Yes                |                |                   |               |
| Required start temperature          | 25.0°C             |                |                   |               |
| Acceptable deviation                | 0.5°C              |                |                   |               |
| Time to wait                        | 60 seconds         |                |                   |               |
| Stir speed of                       | 50%                |                |                   |               |
| <b>Titration 1</b>                  |                    |                |                   |               |
| Titrate from                        | Low to high pH     |                |                   |               |
| Adjust to start pH                  | Yes                |                |                   |               |
| After pH adjust stir for            | 30 seconds         |                |                   |               |
| Stir to allow partitioning for      | 15 seconds         |                |                   |               |
| Stirrer speed for partitioning      | 50%                |                |                   |               |
| <b>Titration 2</b>                  |                    |                |                   |               |
| Titrate from                        | Low to high pH     |                |                   |               |
| Add additional water                | 0.00 mL            |                |                   |               |
| Additional partition solvent volume | 0.040 mL           |                |                   |               |
| Additional partition solvent added  | Automatic          |                |                   |               |
| After pH adjust stir for            | 30 seconds         |                |                   |               |
| Stir to allow partitioning for      | 15 seconds         |                |                   |               |
| Stirrer speed for partitioning      | 55%                |                |                   |               |



Sample name: **M09\_octanol** Experiment start time: **3/3/2018 12:18:26 AM**  
 Assay name: **pH-metric high logP** Analyst: **Pion**  
 Assay ID: **18C-03001** Instrument ID: **T312060**  
 Filename: **C:\Sirius\_T3\Mehtap\20180302\_exp29\_logP\_T3-2\18C-03001\_M09\_octanol\_pH-metric high logP.t3r**

## Assay Settings (continued)

| Setting                             | Value          | Original Value | Date/Time changed | Imported from |
|-------------------------------------|----------------|----------------|-------------------|---------------|
| <b>Titration 3</b>                  |                |                |                   |               |
| Titrate from                        | Low to high pH |                |                   |               |
| Add additional water                | 0.00 mL        |                |                   |               |
| Additional partition solvent volume | 0.100 mL       |                |                   |               |
| Additional partition solvent added  | Automatic      |                |                   |               |
| After pH adjust stir for            | 30 seconds     |                |                   |               |
| Stir to allow partitioning for      | 15 seconds     |                |                   |               |
| Stirrer speed for partitioning      | 60%            |                |                   |               |
| <b>Data Point Stability</b>         |                |                |                   |               |
| Stir during data point collection   | No             |                |                   |               |
| Delay before data point collection  | 0 seconds      |                |                   |               |
| Number of points to average         | 20 points      |                |                   |               |
| Time interval between points        | 0.50 seconds   |                |                   |               |
| Required maximum standard deviation | 0.00100 dpH/dt |                |                   |               |
| Stability timeout after             | 60 seconds     |                |                   |               |

## Calibration Settings

| Setting                   | Value  | Date/Time changed    | Imported from             |
|---------------------------|--------|----------------------|---------------------------|
| Four-Plus alpha           | 0.111  | 3/3/2018 12:18:25 AM | C:\Sirius_T3\HCl18C02.t3r |
| Four-Plus S               | 0.9988 | 3/3/2018 12:18:25 AM | C:\Sirius_T3\HCl18C02.t3r |
| Four-Plus jH              | 1.0    | 3/3/2018 12:18:25 AM | C:\Sirius_T3\HCl18C02.t3r |
| Four-Plus jOH             | -0.8   | 3/3/2018 12:18:25 AM | C:\Sirius_T3\HCl18C02.t3r |
| Base concentration factor | 1.000  | 3/3/2018 12:18:26 AM | C:\Sirius_T3\KOH18B27.t3r |
| Acid concentration factor | 0.999  | 3/3/2018 12:18:25 AM | C:\Sirius_T3\HCl18C02.t3r |

## Instrument Settings

| Setting              | Value                      | Batch Id    | Install date           |
|----------------------|----------------------------|-------------|------------------------|
| Instrument owner     | Merck                      |             |                        |
| Instrument ID        | T312060                    |             |                        |
| Instrument type      | T3 Simulator               |             |                        |
| Software version     | 1.1.3.0                    |             |                        |
| Dispenser module     |                            | T3DM1200361 | 3/31/2009 5:24:52 AM   |
| Dispenser 0          | Water                      |             | 3/31/2009 5:25:05 AM   |
| Syringe volume       | 2.5 mL                     |             |                        |
| Firmware version     | 1.2.1(r2)                  |             |                        |
| Titrant              | Water (0.15 M KCl)         | 02-06-2018  | 2/27/2018 10:05:59 AM  |
| Dispenser 2          | Acid                       |             | 3/31/2009 5:25:11 AM   |
| Syringe volume       | 0.5 mL                     |             |                        |
| Firmware version     | 1.2.1(r2)                  |             |                        |
| Titrant              | Acid (0.5 M HCl)           | 02-27-2018  | 2/27/2018 10:27:22 AM  |
| Dispenser 1          | Base                       |             | 3/31/2009 5:25:21 AM   |
| Syringe volume       | 0.5 mL                     |             |                        |
| Firmware version     | 1.2.1(r2)                  |             |                        |
| Titrant              | Base (0.5 M KOH)           | 9/22/2017   | 2/27/2018 10:21:22 AM  |
| Dispenser 5          | Cosolvent                  |             | 3/31/2009 5:26:24 AM   |
| Syringe volume       | 2.5 mL                     |             |                        |
| Firmware version     | 1.2.1(r2)                  |             |                        |
| Distribution valve 5 | Distribution Valve         |             | 3/31/2009 5:28:19 AM   |
| Firmware version     | 1.1.3                      |             |                        |
| Port A               | Methanol (80%, 0.15 M KCl) | 09-26-17    | 2/7/2018 9:42:01 AM    |
| Port B               | Cyclohexane                | 11-01-17    | 2/27/2018 10:37:57 AM  |
| Dispenser 3          | Buffer                     |             | 8/3/2010 5:05:16 AM    |
| Syringe volume       | 0.5 mL                     |             |                        |
| Firmware version     | 1.2.1(r2)                  |             |                        |
| Titrant              | Dodecane                   | 2018/01/31  | 2/28/2018 10:18:04 AM  |
| Dispenser 6          | Octanol                    |             | 10/22/2010 10:52:43 AM |



Sample name: **M09\_octanol** Experiment start time: **3/3/2018 12:18:26 AM**  
 Assay name: **pH-metric high logP** Analyst: **Pion**  
 Assay ID: **18C-03001** Instrument ID: **T312060**  
 Filename: **C:\Sirius\_T3\Mehtap\20180302\_exp29\_logP\_T3-2\18C-03001\_M09\_octanol\_pH-metric high logP.t3r**

## Instrument Settings (continued)

| Setting                                   | Value                      | Batch Id    | Install date           |
|-------------------------------------------|----------------------------|-------------|------------------------|
| Syringe volume                            | 0.5 mL                     |             |                        |
| Firmware version                          | 1.2.1(r2)                  |             |                        |
| Titrant                                   | Octanol                    | 01-31-2018  | 2/27/2018 9:59:35 AM   |
| Titrator                                  |                            | T3TM1200161 | 3/31/2009 5:24:17 AM   |
| Horizontal axis firmware version          | 1.17 AI1DI2DO2 Stepper 2   |             |                        |
| Vertical axis firmware version            | 1.17 AI1DI2DO2 Stepper 2   |             |                        |
| Chassis I/O firmware version              | 1.11 AI1DI0DO4 Norgren I/O |             |                        |
| Probe I/O firmware version                | 1.1.1                      |             |                        |
| Electrode                                 | T3 Electrode               | T3E0923     | 1/23/2018 2:01:00 PM   |
| E0 calibration                            | +4.45 mV                   |             | 3/3/2018 12:18:54 AM   |
| Filling solution                          | 3M KCl                     | KCL097      | 3/2/2018 9:43:24 AM    |
| Liquids                                   |                            |             |                        |
| Wash 1                                    | 50% IPA:50% Water          |             | 3/2/2018 9:45:12 AM    |
| Wash 2                                    | 0.5% Triton X-100 in H2O   |             | 3/2/2018 9:45:15 AM    |
| Buffer position 1                         | pH7 Wash                   |             | 3/2/2018 9:45:18 AM    |
| Buffer position 2                         | pH 7                       |             | 3/2/2018 9:45:21 AM    |
| Storage position                          |                            |             | 3/2/2018 9:44:44 AM    |
| Wash water                                | 7.2e+003 mL                | 02-27-2018  | 2/27/2018 9:54:39 AM   |
| Waste                                     | 8.3e+003 mL                |             | 11/28/2017 10:36:29 AM |
| Temperature controller                    |                            |             | 8/5/2010 6:35:13 AM    |
| Turbidity detector                        |                            |             | 3/31/2009 5:24:45 AM   |
| Spectrometer                              |                            | 074811      | 11/23/2010 11:22:28 AM |
| Dip probe                                 |                            | 10196       |                        |
| Wavelength coefficient A0                 | 183.333                    |             |                        |
| Wavelength coefficient A1                 | 2.21568                    |             |                        |
| Wavelength coefficient A2                 | -0.000289308               |             |                        |
| Total lamp lit time                       | 120:41:49                  |             | 11/23/2010 11:22:28 AM |
| Calibrated on                             | 2/27/2018 10:40:38 AM      |             |                        |
| Integration time                          | 40                         |             |                        |
| Scans averaged                            | 10                         |             |                        |
| Autoloader                                |                            | T3AL1200345 | 11/10/2015 9:34:13 AM  |
| Left-right axis firmware version          | 1.17 AI1DI2DO2 Stepper 2   |             |                        |
| Front-back axis firmware version          | 1.17 AI1DI2DO2 Stepper 2   |             |                        |
| Vertical axis firmware version            | 1.17 AI1DI2DO2 Stepper 2   |             |                        |
| Chassis I/O firmware version              | 1.11 AI1DI0DO4 Norgren I/O |             |                        |
| Configuration                             |                            |             |                        |
| Alternate titration position              | Titration position         |             |                        |
| Alternate reference position              | Reference position         |             |                        |
| Maximum standard vial volume              | 3.50 mL                    |             |                        |
| Maximum alternate vial volume             | 25.00 mL                   |             |                        |
| Automatic action idle period              | 5 minute(s)                |             |                        |
| Titrant tube volume                       | 1.3 mL                     |             |                        |
| Syringe flush count                       | 3.50                       |             |                        |
| Flowing wash pump volume                  | 20.0 mL                    |             |                        |
| Flowing wash stir duration                | 5 s                        |             |                        |
| Flowing wash stir speed                   | 30%                        |             |                        |
| Solvent wash stir duration                | 5 s                        |             |                        |
| Solvent wash stir speed                   | 30%                        |             |                        |
| Surfactant wash stir duration             | 5 s                        |             |                        |
| Surfactant wash stir speed                | 30%                        |             |                        |
| E0 calibration minimum number of points   | 10                         |             |                        |
| E0 calibration maximum standard deviation | 0.01500                    |             |                        |
| E0 calibration timeout period             | 60 s                       |             |                        |
| E0 calibration stir duration              | 5 s                        |             |                        |
| E0 calibration preparation stir speed     | 30%                        |             |                        |
| E0 calibration buffer wash stir duration  | 5 s                        |             |                        |
| E0 calibration buffer wash stir speed     | 30%                        |             |                        |
| E0 calibration reading stir speed         | 0%                         |             |                        |

|              |                                                                                                   |                        |                             |
|--------------|---------------------------------------------------------------------------------------------------|------------------------|-----------------------------|
| Sample name: | <b>M09_octanol</b>                                                                                | Experiment start time: | <b>3/3/2018 12:18:26 AM</b> |
| Assay name:  | <b>pH-metric high logP</b>                                                                        | Analyst:               | <b>Pion</b>                 |
| Assay ID:    | <b>18C-03001</b>                                                                                  | Instrument ID:         | <b>T312060</b>              |
| Filename:    | <b>C:\Sirius_T3\Mehtap\20180302_exp29_logP_T3-2\18C-03001_M09_octanol_pH-metric high logP.t3r</b> |                        |                             |

## Instrument Settings (continued)

| Setting                                     | Value   | Batch Id | Install date |
|---------------------------------------------|---------|----------|--------------|
| Spectrometer calibration stir duration      | 5 s     |          |              |
| Spectrometer calibration stir speed         | 30%     |          |              |
| Spectrometer calibration wash pump volume   | 20.0 mL |          |              |
| Spectrometer calibration wash stir duration | 5 s     |          |              |
| Spectrometer calibration wash stir speed    | 30%     |          |              |
| Overhead dispense height                    | 10000   |          |              |

## Refinement Settings

| Setting                        | Value    | Default value |
|--------------------------------|----------|---------------|
| Turbidity detection method     | None     | None          |
| Turbidity wavelength to assess | 500.0 nm | 500.0 nm      |
| Turbidity maximum absorbance   | 0.100    | 0.100         |
| Turbidity probe threshold      | 50.00    | 50.00         |

## Experiment Log

[2:37] Air gap created for Water (0.15 M KCl)  
 [2:37] Air gap created for Acid (0.5 M HCl)  
 [2:38] Air gap created for Base (0.5 M KOH)  
 [2:38] Air gap released for Water (0.15 M KCl)  
 [2:42] Titrator arm moved over Titration position  
 [2:42] Titration 1 of 3  
 [2:42] Adding initial titrants  
 [2:42] Automatically add 1.50000 mL of water  
 [3:07] Dispensed 1.500000 mL of Water (0.15 M KCl)  
 [3:11] Titrator arm moved over Drain  
 [5:52] Titrator arm moved to Titration position  
 [5:52] Argon flow rate set to 100  
 [5:52] Stirrer speed set to 10  
 [5:57] Automatically add 0.03000 mL of Octanol  
 [5:58] Dispensed 0.030009 mL of Octanol  
 [5:59] Initial pH = 4.70  
 [5:59] Iterative adjust 4.70 -> 2.00  
 [5:59] pH 4.70 -> 2.00  
 [6:01] Air gap released for Acid (0.5 M HCl)  
 [6:02] Dispensed 0.046096 mL of Acid (0.5 M HCl)  
 [6:07] pH 2.02 -> 2.00  
 [6:07] Dispensed 0.001717 mL of Acid (0.5 M HCl)  
 [6:12] Holding pH 2.00  
 [8:12] Stirrer speed set to 0  
 [8:12] Stirrer speed set to 50  
 [8:12] Iterative adjust 1.97 -> 2.00  
 [8:12] pH 1.97 -> 2.00  
 [8:13] Air gap released for Base (0.5 M KOH)  
 [8:14] Dispensed 0.003222 mL of Base (0.5 M KOH)  
 [9:04] Stirrer speed set to 0  
 [9:14] Datapoint id 1 collected  
 [9:14] Stirrer speed set to 50  
 [9:19] pH 2.00 -> 2.20  
 [9:19] Using cautious pH adjust  
 [9:19] Dispensed 0.007690 mL of Base (0.5 M KOH)  
 [9:24] Stepping pH = 2.08  
 [9:25] Dispensed 0.006867 mL of Base (0.5 M KOH)  
 [9:30] Stepping pH = 2.18  
 [9:30] Dispensed 0.001505 mL of Base (0.5 M KOH)  
 [9:35] Stepping pH = 2.20  
 [9:50] Stirrer speed set to 0  
 [10:00] Datapoint id 2 collected

Sample name: **M09\_octanol**  
Assay name: **pH-metric high logP**  
Assay ID: **18C-03001**  
Filename: **C:\Sirius\_T3\Mehtap\20180302\_exp29\_logP\_T3-2\18C-03001\_M09\_octanol\_pH-metric high logP.t3r**

Experiment start time: **3/3/2018 12:18:26 AM**  
Analyst: **Pion**  
Instrument ID: **T312060**

## Experiment Log (continued)

[10:00] Charge balance equation is out by -4.5%  
[10:00] Stirrer speed set to 50  
[10:05] pH 2.21 -> 2.41  
[10:05] Using charge balance adjust  
[10:06] Dispensed 0.009572 mL of Base (0.5 M KOH)  
[10:26] Stirrer speed set to 0  
[10:36] Datapoint id 3 collected  
[10:36] Charge balance equation is out by -12.3%  
[10:36] Stirrer speed set to 50  
[10:41] pH 2.39 -> 2.59  
[10:41] Using charge balance adjust  
[10:41] Dispensed 0.006350 mL of Base (0.5 M KOH)  
[11:01] Stirrer speed set to 0  
[11:11] Datapoint id 4 collected  
[11:11] Charge balance equation is out by -7.1%  
[11:11] Stirrer speed set to 50  
[11:17] pH 2.58 -> 2.78  
[11:17] Using charge balance adjust  
[11:17] Dispensed 0.004139 mL of Base (0.5 M KOH)  
[11:37] Stirrer speed set to 0  
[11:47] Datapoint id 5 collected  
[11:47] Charge balance equation is out by -8.6%  
[11:47] Stirrer speed set to 50  
[11:52] pH 2.77 -> 2.97  
[11:52] Using charge balance adjust  
[11:52] Dispensed 0.002799 mL of Base (0.5 M KOH)  
[12:12] Stirrer speed set to 0  
[12:22] Datapoint id 6 collected  
[12:22] Charge balance equation is out by -6.9%  
[12:22] Stirrer speed set to 50  
[12:28] pH 2.97 -> 3.17  
[12:28] Using charge balance adjust  
[12:28] Dispensed 0.001976 mL of Base (0.5 M KOH)  
[12:48] Stirrer speed set to 0  
[12:58] Datapoint id 7 collected  
[12:58] Charge balance equation is out by 13.6%  
[12:58] Stirrer speed set to 50  
[13:03] pH 3.20 -> 3.40  
[13:03] Using charge balance adjust  
[13:03] Dispensed 0.001458 mL of Base (0.5 M KOH)  
[13:23] Stirrer speed set to 0  
[13:33] Datapoint id 8 collected  
[13:33] Charge balance equation is out by 15.2%  
[13:33] Stirrer speed set to 50  
[13:38] pH 3.44 -> 3.64  
[13:38] Using cautious pH adjust  
[13:39] Dispensed 0.000611 mL of Base (0.5 M KOH)  
[13:44] Stepping pH = 3.54  
[13:44] Dispensed 0.000423 mL of Base (0.5 M KOH)  
[13:49] Stepping pH = 3.61  
[13:49] Dispensed 0.000118 mL of Base (0.5 M KOH)  
[13:54] Stepping pH = 3.63  
[13:54] Dispensed 0.000071 mL of Base (0.5 M KOH)  
[13:59] Stepping pH = 3.64  
[14:14] Stirrer speed set to 0  
[14:24] Datapoint id 9 collected  
[14:24] Charge balance equation is out by 1.1%  
[14:24] Stirrer speed set to 50  
[14:29] pH 3.63 -> 3.83

Sample name: **M09\_octanol**  
Assay name: **pH-metric high logP**  
Assay ID: **18C-03001**  
Filename: **C:\Sirius\_T3\Mehtap\20180302\_exp29\_logP\_T3-2\18C-03001\_M09\_octanol\_pH-metric high logP.t3r**

Experiment start time: **3/3/2018 12:18:26 AM**  
Analyst: **Pion**  
Instrument ID: **T312060**

## Experiment Log (continued)

[14:29] Using charge balance adjust  
[14:29] Dispensed 0.001176 mL of Base (0.5 M KOH)  
[14:50] Stirrer speed set to 0  
[15:00] Datapoint id 10 collected  
[15:00] Charge balance equation is out by -3.3%  
[15:00] Stirrer speed set to 50  
[15:05] pH 3.83 -> 4.03  
[15:05] Using charge balance adjust  
[15:05] Dispensed 0.001105 mL of Base (0.5 M KOH)  
[15:25] Stirrer speed set to 0  
[15:35] Datapoint id 11 collected  
[15:35] Charge balance equation is out by -10.7%  
[15:35] Stirrer speed set to 50  
[15:40] pH 4.02 -> 4.22  
[15:40] Using charge balance adjust  
[15:40] Dispensed 0.000988 mL of Base (0.5 M KOH)  
[16:01] Stirrer speed set to 0  
[16:11] Datapoint id 12 collected  
[16:11] Charge balance equation is out by -25.2%  
[16:11] Stirrer speed set to 50  
[16:16] pH 4.18 -> 4.38  
[16:16] Using cautious pH adjust  
[16:16] Dispensed 0.000447 mL of Base (0.5 M KOH)  
[16:21] Stepping pH = 4.25  
[16:21] Dispensed 0.000470 mL of Base (0.5 M KOH)  
[16:27] Stepping pH = 4.35  
[16:27] Dispensed 0.000118 mL of Base (0.5 M KOH)  
[16:32] Stepping pH = 4.34  
[16:32] Dispensed 0.000729 mL of Base (0.5 M KOH)  
[16:37] Stepping pH = 4.51  
[16:52] Stirrer speed set to 0  
[17:03] Datapoint id 13 collected  
[17:03] Charge balance equation is out by -100.8%  
[17:03] Stirrer speed set to 50  
[17:08] pH 4.50 -> 4.70  
[17:08] Using cautious pH adjust  
[17:08] Dispensed 0.000306 mL of Base (0.5 M KOH)  
[17:13] Stepping pH = 4.56  
[17:13] Dispensed 0.000376 mL of Base (0.5 M KOH)  
[17:18] Stepping pH = 4.65  
[17:19] Dispensed 0.000141 mL of Base (0.5 M KOH)  
[17:24] Stepping pH = 4.67  
[17:24] Dispensed 0.000118 mL of Base (0.5 M KOH)  
[17:29] Stepping pH = 4.70  
[17:44] Stirrer speed set to 0  
[17:55] Datapoint id 14 collected  
[17:55] Charge balance equation is out by -55.5%  
[17:55] Stirrer speed set to 50  
[18:00] pH 4.68 -> 4.88  
[18:00] Using cautious pH adjust  
[18:00] Dispensed 0.000212 mL of Base (0.5 M KOH)  
[18:05] Stepping pH = 4.74  
[18:05] Dispensed 0.000306 mL of Base (0.5 M KOH)  
[18:10] Stepping pH = 4.86  
[18:11] Dispensed 0.000047 mL of Base (0.5 M KOH)  
[18:16] Stepping pH = 4.86  
[18:16] Dispensed 0.000282 mL of Base (0.5 M KOH)  
[18:21] Stepping pH = 4.99  
[18:36] Stirrer speed set to 0

Sample name: **M09\_octanol**  
Assay name: **pH-metric high logP**  
Assay ID: **18C-03001**  
Filename: **C:\Sirius\_T3\Mehtap\20180302\_exp29\_logP\_T3-2\18C-03001\_M09\_octanol\_pH-metric high logP.t3r**

Experiment start time: **3/3/2018 12:18:26 AM**  
Analyst: **Pion**  
Instrument ID: **T312060**

## Experiment Log (continued)

[18:48] Datapoint id 15 collected  
[18:48] Charge balance equation is out by -89.5%  
[18:48] Stirrer speed set to 50  
[18:53] pH 4.99 -> 5.19  
[18:53] Using cautious pH adjust  
[18:53] Dispensed 0.000141 mL of Base (0.5 M KOH)  
[18:58] Stepping pH = 5.02  
[18:58] Dispensed 0.000235 mL of Base (0.5 M KOH)  
[19:03] Stepping pH = 5.15  
[19:03] Dispensed 0.000047 mL of Base (0.5 M KOH)  
[19:08] Stepping pH = 5.16  
[19:09] Dispensed 0.000141 mL of Base (0.5 M KOH)  
[19:14] Stepping pH = 5.27  
[19:29] Stirrer speed set to 0  
[19:42] Datapoint id 16 collected  
[19:42] Charge balance equation is out by -110.5%  
[19:42] Stirrer speed set to 50  
[19:47] pH 5.26 -> 5.46  
[19:47] Using cautious pH adjust  
[19:47] Dispensed 0.000071 mL of Base (0.5 M KOH)  
[19:53] Stepping pH = 5.28  
[19:53] Dispensed 0.000212 mL of Base (0.5 M KOH)  
[19:58] Stepping pH = 5.48  
[20:13] Stirrer speed set to 0  
[20:27] Datapoint id 17 collected  
[20:27] Charge balance equation is out by -85.7%  
[20:27] Stirrer speed set to 50  
[20:32] pH 5.48 -> 5.68  
[20:32] Using cautious pH adjust  
[20:33] Dispensed 0.000047 mL of Base (0.5 M KOH)  
[20:38] Stepping pH = 5.48  
[20:38] Dispensed 0.000282 mL of Base (0.5 M KOH)  
[20:43] Stepping pH = 6.08  
[20:58] Stirrer speed set to 0  
[21:22] Datapoint id 18 collected  
[21:22] Charge balance equation is out by -201.5%  
[21:22] Stirrer speed set to 50  
[21:27] pH 6.16 -> 6.36  
[21:27] Using cautious pH adjust  
[21:27] Dispensed 0.000024 mL of Base (0.5 M KOH)  
[21:32] Stepping pH = 6.16  
[21:32] Dispensed 0.000141 mL of Base (0.5 M KOH)  
[21:38] Stepping pH = 6.76  
[21:53] Stirrer speed set to 0  
[22:48] Datapoint id 19 collected  
[22:48] Charge balance equation is out by -210.1%  
[22:48] Stirrer speed set to 50  
[22:53] pH 6.82 -> 7.02  
[22:53] Using cautious pH adjust  
[22:53] Dispensed 0.000024 mL of Base (0.5 M KOH)  
[22:58] Stepping pH = 6.82  
[22:58] Dispensed 0.000071 mL of Base (0.5 M KOH)  
[23:03] Stepping pH = 7.05  
[23:18] Stirrer speed set to 0  
[24:18] Datapoint id 20 collected  
[24:18] Charge balance equation is out by -228.7%  
[24:18] Stirrer speed set to 50  
[24:23] pH 7.20 -> 7.40  
[24:23] Using cautious pH adjust

Sample name: **M09\_octanol**  
Assay name: **pH-metric high logP**  
Assay ID: **18C-03001**  
Filename: **C:\Sirius\_T3\Mehtap\20180302\_exp29\_logP\_T3-2\18C-03001\_M09\_octanol\_pH-metric high logP.t3r**

Experiment start time: **3/3/2018 12:18:26 AM**  
Analyst: **Pion**  
Instrument ID: **T312060**

## Experiment Log (continued)

[24:24] Dispensed 0.000024 mL of Base (0.5 M KOH)  
[24:29] Stepping pH = 7.22  
[24:29] Dispensed 0.000024 mL of Base (0.5 M KOH)  
[24:34] Stepping pH = 7.28  
[24:34] Dispensed 0.000024 mL of Base (0.5 M KOH)  
[24:39] Stepping pH = 7.54  
[24:54] Stirrer speed set to 0  
[25:54] Datapoint id 21 collected  
[25:54] Charge balance equation is out by -355.4%  
[25:54] Stirrer speed set to 50  
[25:59] pH 7.96 -> 8.16  
[25:59] Using cautious pH adjust  
[25:59] Dispensed 0.000024 mL of Base (0.5 M KOH)  
[26:04] Stepping pH = 7.99  
[26:04] Dispensed 0.000024 mL of Base (0.5 M KOH)  
[26:09] Stepping pH = 8.15  
[26:24] Stirrer speed set to 0  
[27:24] Datapoint id 22 collected  
[27:24] Charge balance equation is out by -510.2%  
[27:24] Stirrer speed set to 50  
[27:30] pH 8.24 -> 8.44  
[27:30] Using cautious pH adjust  
[27:30] Dispensed 0.000024 mL of Base (0.5 M KOH)  
[27:35] Stepping pH = 8.26  
[27:35] Dispensed 0.000024 mL of Base (0.5 M KOH)  
[27:40] Stepping pH = 8.48  
[27:55] Stirrer speed set to 0  
[28:46] Datapoint id 23 collected  
[28:46] Charge balance equation is out by -341.8%  
[28:46] Stirrer speed set to 50  
[28:51] pH 8.60 -> 8.80  
[28:51] Using cautious pH adjust  
[28:51] Dispensed 0.000024 mL of Base (0.5 M KOH)  
[28:56] Stepping pH = 8.61  
[28:56] Dispensed 0.000024 mL of Base (0.5 M KOH)  
[29:02] Stepping pH = 8.77  
[29:02] Dispensed 0.000024 mL of Base (0.5 M KOH)  
[29:07] Stepping pH = 8.94  
[29:22] Stirrer speed set to 0  
[29:42] Datapoint id 24 collected  
[29:42] Charge balance equation is out by -267.1%  
[29:42] Stirrer speed set to 50  
[29:47] pH 8.96 -> 9.05  
[29:47] Using cautious pH adjust  
[29:47] Dispensed 0.000024 mL of Base (0.5 M KOH)  
[29:53] Stepping pH = 8.97  
[29:53] Dispensed 0.000024 mL of Base (0.5 M KOH)  
[29:58] Stepping pH = 9.06  
[30:13] Stirrer speed set to 0  
[30:37] Datapoint id 25 collected  
[30:37] Charge balance equation is out by -171.7%  
[30:37] Titration 2 of 3  
[30:37] Adding initial titrants  
[30:37] Automatically add 0.04000 mL of Octanol  
[30:38] Dispensed 0.040005 mL of Octanol  
[30:38] Stirrer speed set to 10  
[30:39] Stirrer speed set to 55  
[30:39] Iterative adjust 9.09 -> 2.00  
[30:39] pH 9.09 -> 2.00



Sample name: **M09\_octanol**  
Assay name: **pH-metric high logP**  
Assay ID: **18C-03001**  
Filename: **C:\Sirius\_T3\Mehtap\20180302\_exp29\_logP\_T3-2\18C-03001\_M09\_octanol\_pH-metric high logP.t3r**

Experiment start time: **3/3/2018 12:18:26 AM**  
Analyst: **Pion**  
Instrument ID: **T312060**

## Experiment Log (continued)

[30:40] Dispensed 0.050376 mL of Acid (0.5 M HCl)  
[30:46] pH 2.06 -> 2.00  
[30:46] Dispensed 0.006232 mL of Acid (0.5 M HCl)  
[31:36] Stirrer speed set to 0  
[31:46] Datapoint id 26 collected  
[31:46] Stirrer speed set to 55  
[31:51] pH 1.99 -> 2.19  
[31:51] Using cautious pH adjust  
[31:51] Dispensed 0.008561 mL of Base (0.5 M KOH)  
[31:57] Stepping pH = 2.08  
[31:57] Dispensed 0.006515 mL of Base (0.5 M KOH)  
[32:02] Stepping pH = 2.15  
[32:02] Dispensed 0.002799 mL of Base (0.5 M KOH)  
[32:07] Stepping pH = 2.18  
[32:22] Stirrer speed set to 0  
[32:32] Datapoint id 27 collected  
[32:32] Charge balance equation is out by -4.4%  
[32:32] Stirrer speed set to 55  
[32:37] pH 2.19 -> 2.39  
[32:37] Using charge balance adjust  
[32:38] Dispensed 0.010795 mL of Base (0.5 M KOH)  
[32:58] Stirrer speed set to 0  
[33:08] Datapoint id 28 collected  
[33:08] Charge balance equation is out by -0.6%  
[33:08] Stirrer speed set to 55  
[33:14] pH 2.39 -> 2.59  
[33:14] Using charge balance adjust  
[33:14] Dispensed 0.006820 mL of Base (0.5 M KOH)  
[33:34] Stirrer speed set to 0  
[33:45] Datapoint id 29 collected  
[33:45] Charge balance equation is out by -14.0%  
[33:45] Stirrer speed set to 55  
[33:50] pH 2.57 -> 2.77  
[33:50] Using charge balance adjust  
[33:50] Dispensed 0.004657 mL of Base (0.5 M KOH)  
[34:10] Stirrer speed set to 0  
[34:20] Datapoint id 30 collected  
[34:20] Charge balance equation is out by -11.3%  
[34:20] Stirrer speed set to 55  
[34:25] pH 2.76 -> 2.96  
[34:25] Using charge balance adjust  
[34:25] Dispensed 0.003246 mL of Base (0.5 M KOH)  
[34:46] Stirrer speed set to 0  
[34:56] Datapoint id 31 collected  
[34:56] Charge balance equation is out by -10.5%  
[34:56] Stirrer speed set to 55  
[35:01] pH 2.94 -> 3.14  
[35:01] Using charge balance adjust  
[35:01] Dispensed 0.002375 mL of Base (0.5 M KOH)  
[35:21] Stirrer speed set to 0  
[35:32] Datapoint id 32 collected  
[35:32] Charge balance equation is out by 29.9%  
[35:32] Stirrer speed set to 55  
[35:37] pH 3.21 -> 3.41  
[35:37] Using cautious pH adjust  
[35:37] Dispensed 0.000870 mL of Base (0.5 M KOH)  
[35:42] Stepping pH = 3.32  
[35:42] Dispensed 0.000517 mL of Base (0.5 M KOH)  
[35:47] Stepping pH = 3.39

Sample name: **M09\_octanol**  
Assay name: **pH-metric high logP**  
Assay ID: **18C-03001**  
Filename: **C:\Sirius\_T3\Mehtap\20180302\_exp29\_logP\_T3-2\18C-03001\_M09\_octanol\_pH-metric high logP.t3r**

Experiment start time: **3/3/2018 12:18:26 AM**  
Analyst: **Pion**  
Instrument ID: **T312060**

## Experiment Log (continued)

[35:47] Dispensed 0.000118 mL of Base (0.5 M KOH)  
[35:52] Stepping pH = 3.40  
[36:07] Stirrer speed set to 0  
[36:18] Datapoint id 33 collected  
[36:18] Charge balance equation is out by 13.6%  
[36:18] Stirrer speed set to 55  
[36:23] pH 3.40 -> 3.60  
[36:23] Using charge balance adjust  
[36:23] Dispensed 0.001482 mL of Base (0.5 M KOH)  
[36:43] Stirrer speed set to 0  
[36:53] Datapoint id 34 collected  
[36:53] Charge balance equation is out by 4.3%  
[36:53] Stirrer speed set to 55  
[36:58] pH 3.61 -> 3.81  
[36:58] Using charge balance adjust  
[36:58] Dispensed 0.001270 mL of Base (0.5 M KOH)  
[37:18] Stirrer speed set to 0  
[37:28] Datapoint id 35 collected  
[37:28] Charge balance equation is out by -15.5%  
[37:28] Stirrer speed set to 55  
[37:34] pH 3.78 -> 3.98  
[37:34] Using cautious pH adjust  
[37:34] Dispensed 0.000541 mL of Base (0.5 M KOH)  
[37:39] Stepping pH = 3.86  
[37:39] Dispensed 0.000541 mL of Base (0.5 M KOH)  
[37:44] Stepping pH = 3.95  
[37:44] Dispensed 0.000188 mL of Base (0.5 M KOH)  
[37:49] Stepping pH = 3.97  
[37:49] Dispensed 0.000071 mL of Base (0.5 M KOH)  
[37:54] Stepping pH = 3.97  
[37:54] Dispensed 0.000212 mL of Base (0.5 M KOH)  
[38:00] Stepping pH = 4.01  
[38:15] Stirrer speed set to 0  
[38:25] Datapoint id 36 collected  
[38:25] Charge balance equation is out by -41.9%  
[38:25] Stirrer speed set to 55  
[38:30] pH 4.01 -> 4.21  
[38:30] Using cautious pH adjust  
[38:30] Dispensed 0.000423 mL of Base (0.5 M KOH)  
[38:35] Stepping pH = 4.09  
[38:35] Dispensed 0.000400 mL of Base (0.5 M KOH)  
[38:41] Stepping pH = 4.17  
[38:41] Dispensed 0.000188 mL of Base (0.5 M KOH)  
[38:46] Stepping pH = 4.20  
[38:46] Dispensed 0.000071 mL of Base (0.5 M KOH)  
[38:51] Stepping pH = 4.21  
[39:06] Stirrer speed set to 0  
[39:16] Datapoint id 37 collected  
[39:16] Charge balance equation is out by -27.1%  
[39:16] Stirrer speed set to 55  
[39:21] pH 4.21 -> 4.41  
[39:21] Using cautious pH adjust  
[39:21] Dispensed 0.000329 mL of Base (0.5 M KOH)  
[39:26] Stepping pH = 4.28  
[39:26] Dispensed 0.000306 mL of Base (0.5 M KOH)  
[39:31] Stepping pH = 4.36  
[39:31] Dispensed 0.000141 mL of Base (0.5 M KOH)  
[39:37] Stepping pH = 4.39  
[39:37] Dispensed 0.000047 mL of Base (0.5 M KOH)



Sample name: **M09\_octanol**  
Assay name: **pH-metric high logP**  
Assay ID: **18C-03001**  
Filename: **C:\Sirius\_T3\Mehtap\20180302\_exp29\_logP\_T3-2\18C-03001\_M09\_octanol\_pH-metric high logP.t3r**

Experiment start time: **3/3/2018 12:18:26 AM**  
Analyst: **Pion**  
Instrument ID: **T312060**

## Experiment Log (continued)

[39:42] Stepping pH = 4.40  
[39:42] Dispensed 0.000071 mL of Base (0.5 M KOH)  
[39:47] Stepping pH = 4.41  
[40:02] Stirrer speed set to 0  
[40:12] Datapoint id 38 collected  
[40:12] Charge balance equation is out by -35.9%  
[40:12] Stirrer speed set to 55  
[40:17] pH 4.41 -> 4.61  
[40:17] Using cautious pH adjust  
[40:17] Dispensed 0.000235 mL of Base (0.5 M KOH)  
[40:22] Stepping pH = 4.48  
[40:22] Dispensed 0.000259 mL of Base (0.5 M KOH)  
[40:27] Stepping pH = 4.57  
[40:28] Dispensed 0.000094 mL of Base (0.5 M KOH)  
[40:33] Stepping pH = 4.59  
[40:33] Dispensed 0.000071 mL of Base (0.5 M KOH)  
[40:38] Stepping pH = 4.60  
[40:53] Stirrer speed set to 0  
[41:03] Datapoint id 39 collected  
[41:03] Charge balance equation is out by -42.4%  
[41:03] Stirrer speed set to 55  
[41:08] pH 4.61 -> 4.81  
[41:08] Using cautious pH adjust  
[41:08] Dispensed 0.000165 mL of Base (0.5 M KOH)  
[41:13] Stepping pH = 4.66  
[41:13] Dispensed 0.000212 mL of Base (0.5 M KOH)  
[41:18] Stepping pH = 4.76  
[41:18] Dispensed 0.000071 mL of Base (0.5 M KOH)  
[41:24] Stepping pH = 4.78  
[41:24] Dispensed 0.000094 mL of Base (0.5 M KOH)  
[41:29] Stepping pH = 4.82  
[41:44] Stirrer speed set to 0  
[41:54] Datapoint id 40 collected  
[41:54] Charge balance equation is out by -63.5%  
[41:54] Stirrer speed set to 55  
[41:59] pH 4.83 -> 5.03  
[41:59] Using cautious pH adjust  
[41:59] Dispensed 0.000094 mL of Base (0.5 M KOH)  
[42:05] Stepping pH = 4.86  
[42:05] Dispensed 0.000235 mL of Base (0.5 M KOH)  
[42:10] Stepping pH = 5.02  
[42:10] Dispensed 0.000024 mL of Base (0.5 M KOH)  
[42:15] Stepping pH = 5.03  
[42:30] Stirrer speed set to 0  
[42:41] Datapoint id 41 collected  
[42:41] Charge balance equation is out by -73.8%  
[42:41] Stirrer speed set to 55  
[42:46] pH 5.04 -> 5.24  
[42:46] Using cautious pH adjust  
[42:46] Dispensed 0.000071 mL of Base (0.5 M KOH)  
[42:51] Stepping pH = 5.06  
[42:51] Dispensed 0.000165 mL of Base (0.5 M KOH)  
[42:56] Stepping pH = 5.23  
[43:12] Stirrer speed set to 0  
[43:23] Datapoint id 42 collected  
[43:23] Charge balance equation is out by -73.2%  
[43:23] Stirrer speed set to 55  
[43:28] pH 5.25 -> 5.45  
[43:28] Using cautious pH adjust

Sample name: **M09\_octanol**  
Assay name: **pH-metric high logP**  
Assay ID: **18C-03001**  
Filename: **C:\Sirius\_T3\Mehtap\20180302\_exp29\_logP\_T3-2\18C-03001\_M09\_octanol\_pH-metric high logP.t3r**

Experiment start time: **3/3/2018 12:18:26 AM**  
Analyst: **Pion**  
Instrument ID: **T312060**

## Experiment Log (continued)

[43:28] Dispensed 0.000047 mL of Base (0.5 M KOH)  
[43:33] Stepping pH = 5.25  
[43:33] Dispensed 0.000141 mL of Base (0.5 M KOH)  
[43:39] Stepping pH = 5.44  
[43:54] Stirrer speed set to 0  
[44:06] Datapoint id 43 collected  
[44:06] Charge balance equation is out by -97.6%  
[44:06] Stirrer speed set to 55  
[44:11] pH 5.47 -> 5.67  
[44:11] Using cautious pH adjust  
[44:11] Dispensed 0.000047 mL of Base (0.5 M KOH)  
[44:16] Stepping pH = 5.48  
[44:17] Dispensed 0.000094 mL of Base (0.5 M KOH)  
[44:22] Stepping pH = 5.69  
[44:37] Stirrer speed set to 0  
[44:50] Datapoint id 44 collected  
[44:50] Charge balance equation is out by -89.8%  
[44:50] Stirrer speed set to 55  
[44:55] pH 5.73 -> 5.93  
[44:55] Using cautious pH adjust  
[44:55] Dispensed 0.000024 mL of Base (0.5 M KOH)  
[45:00] Stepping pH = 5.74  
[45:00] Dispensed 0.000094 mL of Base (0.5 M KOH)  
[45:06] Stepping pH = 6.11  
[45:21] Stirrer speed set to 0  
[45:47] Datapoint id 45 collected  
[45:47] Charge balance equation is out by -93.6%  
[45:47] Stirrer speed set to 55  
[45:52] pH 6.19 -> 6.39  
[45:52] Using cautious pH adjust  
[45:52] Dispensed 0.000024 mL of Base (0.5 M KOH)  
[45:57] Stepping pH = 6.20  
[45:57] Dispensed 0.000071 mL of Base (0.5 M KOH)  
[46:03] Stepping pH = 6.56  
[46:18] Stirrer speed set to 0  
[47:11] Datapoint id 46 collected  
[47:11] Charge balance equation is out by -89.9%  
[47:11] Stirrer speed set to 55  
[47:16] pH 6.72 -> 6.92  
[47:16] Using cautious pH adjust  
[47:16] Dispensed 0.000024 mL of Base (0.5 M KOH)  
[47:22] Stepping pH = 6.76  
[47:22] Dispensed 0.000024 mL of Base (0.5 M KOH)  
[47:27] Stepping pH = 6.87  
[47:27] Dispensed 0.000024 mL of Base (0.5 M KOH)  
[47:32] Stepping pH = 7.07  
[47:47] Stirrer speed set to 0  
[48:47] Datapoint id 47 collected  
[48:47] Charge balance equation is out by -117.3%  
[48:47] Stirrer speed set to 55  
[48:52] pH 7.14 -> 7.34  
[48:52] Using cautious pH adjust  
[48:52] Dispensed 0.000024 mL of Base (0.5 M KOH)  
[48:57] Stepping pH = 7.19  
[48:57] Dispensed 0.000024 mL of Base (0.5 M KOH)  
[49:02] Stepping pH = 7.37  
[49:17] Stirrer speed set to 0  
[50:17] Datapoint id 48 collected  
[50:17] Charge balance equation is out by -157.7%

Sample name: **M09\_octanol**  
Assay name: **pH-metric high logP**  
Assay ID: **18C-03001**  
Filename: **C:\Sirius\_T3\Mehtap\20180302\_exp29\_logP\_T3-2\18C-03001\_M09\_octanol\_pH-metric high logP.t3r**

Experiment start time: **3/3/2018 12:18:26 AM**  
Analyst: **Pion**  
Instrument ID: **T312060**

## Experiment Log (continued)

[50:17] Stirrer speed set to 55  
[50:23] pH 7.40 -> 7.60  
[50:23] Using cautious pH adjust  
[50:23] Dispensed 0.000024 mL of Base (0.5 M KOH)  
[50:28] Stepping pH = 7.40  
[50:28] Dispensed 0.000024 mL of Base (0.5 M KOH)  
[50:33] Stepping pH = 7.65  
[50:48] Stirrer speed set to 0  
[51:48] Datapoint id 49 collected  
[51:48] Charge balance equation is out by -351.7%  
[51:48] Stirrer speed set to 55  
[51:53] pH 7.81 -> 8.01  
[51:53] Using cautious pH adjust  
[51:53] Dispensed 0.000024 mL of Base (0.5 M KOH)  
[51:58] Stepping pH = 7.82  
[51:58] Dispensed 0.000024 mL of Base (0.5 M KOH)  
[52:03] Stepping pH = 7.91  
[52:03] Dispensed 0.000024 mL of Base (0.5 M KOH)  
[52:08] Stepping pH = 8.19  
[52:24] Stirrer speed set to 0  
[53:24] Datapoint id 50 collected  
[53:24] Charge balance equation is out by -782.1%  
[53:24] Stirrer speed set to 55  
[53:29] pH 8.25 -> 8.45  
[53:29] Using cautious pH adjust  
[53:29] Dispensed 0.000024 mL of Base (0.5 M KOH)  
[53:34] Stepping pH = 8.27  
[53:34] Dispensed 0.000024 mL of Base (0.5 M KOH)  
[53:39] Stepping pH = 8.31  
[53:39] Dispensed 0.000024 mL of Base (0.5 M KOH)  
[53:44] Stepping pH = 8.38  
[53:44] Dispensed 0.000024 mL of Base (0.5 M KOH)  
[53:49] Stepping pH = 8.42  
[53:49] Dispensed 0.000024 mL of Base (0.5 M KOH)  
[53:54] Stepping pH = 8.58  
[54:10] Stirrer speed set to 0  
[54:40] Datapoint id 51 collected  
[54:40] Charge balance equation is out by -941.0%  
[54:40] Stirrer speed set to 55  
[54:45] pH 8.62 -> 8.82  
[54:45] Using cautious pH adjust  
[54:45] Dispensed 0.000024 mL of Base (0.5 M KOH)  
[54:50] Stepping pH = 8.65  
[54:50] Dispensed 0.000024 mL of Base (0.5 M KOH)  
[54:55] Stepping pH = 8.73  
[54:55] Dispensed 0.000024 mL of Base (0.5 M KOH)  
[55:00] Stepping pH = 8.85  
[55:15] Stirrer speed set to 0  
[55:50] Datapoint id 52 collected  
[55:50] Charge balance equation is out by -223.8%  
[55:50] Stirrer speed set to 55  
[55:55] pH 8.86 -> 9.05  
[55:55] Using cautious pH adjust  
[55:55] Dispensed 0.000024 mL of Base (0.5 M KOH)  
[56:01] Stepping pH = 8.86  
[56:01] Dispensed 0.000047 mL of Base (0.5 M KOH)  
[56:06] Stepping pH = 8.99  
[56:06] Dispensed 0.000024 mL of Base (0.5 M KOH)  
[56:11] Stepping pH = 9.06

Sample name: **M09\_octanol**  
 Assay name: **pH-metric high logP**  
 Assay ID: **18C-03001**  
 Filename: **C:\Sirius\_T3\Mehtap\20180302\_exp29\_logP\_T3-2\18C-03001\_M09\_octanol\_pH-metric high logP.t3r**

Experiment start time: **3/3/2018 12:18:26 AM**  
 Analyst: **Pion**  
 Instrument ID: **T312060**

## Experiment Log (continued)

[56:26] Stirrer speed set to 0  
 [56:45] Datapoint id 53 collected  
 [56:45] Charge balance equation is out by -177.4%  
 [56:45] Titration 3 of 3  
 [56:45] Adding initial titrants  
 [56:45] Automatically add 0.10000 mL of Octanol  
 [56:48] Dispensed 0.100000 mL of Octanol  
 [56:48] Stirrer speed set to 10  
 [56:49] Stirrer speed set to 60  
 [56:49] Iterative adjust 9.06 -> 2.00  
 [56:49] pH 9.06 -> 2.00  
 [56:50] Dispensed 0.053293 mL of Acid (0.5 M HCl)  
 [56:55] pH 2.07 -> 2.00  
 [56:56] Dispensed 0.007643 mL of Acid (0.5 M HCl)  
 [57:46] Stirrer speed set to 0  
 [57:56] Datapoint id 54 collected  
 [57:56] Stirrer speed set to 60  
 [58:01] pH 1.98 -> 2.18  
 [58:01] Using cautious pH adjust  
 [58:01] Dispensed 0.009431 mL of Base (0.5 M KOH)  
 [58:07] Stepping pH = 2.06  
 [58:07] Dispensed 0.007902 mL of Base (0.5 M KOH)  
 [58:12] Stepping pH = 2.15  
 [58:12] Dispensed 0.002258 mL of Base (0.5 M KOH)  
 [58:17] Stepping pH = 2.17  
 [58:32] Stirrer speed set to 0  
 [58:42] Datapoint id 55 collected  
 [58:42] Charge balance equation is out by -3.9%  
 [58:42] Stirrer speed set to 60  
 [58:47] pH 2.18 -> 2.38  
 [58:47] Using charge balance adjust  
 [58:48] Dispensed 0.011877 mL of Base (0.5 M KOH)  
 [59:08] Stirrer speed set to 0  
 [59:19] Datapoint id 56 collected  
 [59:19] Charge balance equation is out by -8.4%  
 [59:19] Stirrer speed set to 60  
 [59:24] pH 2.37 -> 2.57  
 [59:24] Using charge balance adjust  
 [59:24] Dispensed 0.007832 mL of Base (0.5 M KOH)  
 [59:44] Stirrer speed set to 0  
 [59:54] Datapoint id 57 collected  
 [59:54] Charge balance equation is out by -1.8%  
 [59:54] Stirrer speed set to 60  
 [59:59] pH 2.57 -> 2.77  
 [59:59] Using charge balance adjust  
 [59:59] Dispensed 0.005151 mL of Base (0.5 M KOH)  
 [1:00:20] Stirrer speed set to 0  
 [1:00:30] Datapoint id 58 collected  
 [1:00:30] Charge balance equation is out by -13.0%  
 [1:00:30] Stirrer speed set to 60  
 [1:00:35] pH 2.75 -> 2.95  
 [1:00:35] Using charge balance adjust  
 [1:00:35] Dispensed 0.003669 mL of Base (0.5 M KOH)  
 [1:00:55] Stirrer speed set to 0  
 [1:01:05] Datapoint id 59 collected  
 [1:01:05] Charge balance equation is out by -1.4%  
 [1:01:05] Stirrer speed set to 60  
 [1:01:10] pH 2.96 -> 3.16  
 [1:01:10] Using charge balance adjust

Sample name: **M09\_octanol**  
Assay name: **pH-metric high logP**  
Assay ID: **18C-03001**  
Filename: **C:\Sirius\_T3\Mehtap\20180302\_exp29\_logP\_T3-2\18C-03001\_M09\_octanol\_pH-metric high logP.t3r**

Experiment start time: **3/3/2018 12:18:26 AM**  
Analyst: **Pion**  
Instrument ID: **T312060**

## Experiment Log (continued)

[1:01:10] Dispensed 0.002658 mL of Base (0.5 M KOH)  
[1:01:31] Stirrer speed set to 0  
[1:01:41] Datapoint id 60 collected  
[1:01:41] Charge balance equation is out by -7.0%  
[1:01:41] Stirrer speed set to 60  
[1:01:46] pH 3.15 -> 3.35  
[1:01:46] Using charge balance adjust  
[1:01:46] Dispensed 0.002070 mL of Base (0.5 M KOH)  
[1:02:06] Stirrer speed set to 0  
[1:02:16] Datapoint id 61 collected  
[1:02:16] Charge balance equation is out by -2.9%  
[1:02:16] Stirrer speed set to 60  
[1:02:21] pH 3.35 -> 3.55  
[1:02:21] Using charge balance adjust  
[1:02:21] Dispensed 0.001670 mL of Base (0.5 M KOH)  
[1:02:42] Stirrer speed set to 0  
[1:02:52] Datapoint id 62 collected  
[1:02:52] Charge balance equation is out by 8.9%  
[1:02:52] Stirrer speed set to 60  
[1:02:57] pH 3.57 -> 3.77  
[1:02:57] Using charge balance adjust  
[1:02:57] Dispensed 0.001270 mL of Base (0.5 M KOH)  
[1:03:17] Stirrer speed set to 0  
[1:03:28] Datapoint id 63 collected  
[1:03:28] Charge balance equation is out by -5.5%  
[1:03:28] Stirrer speed set to 60  
[1:03:33] pH 3.77 -> 3.97  
[1:03:33] Using charge balance adjust  
[1:03:33] Dispensed 0.000988 mL of Base (0.5 M KOH)  
[1:03:53] Stirrer speed set to 0  
[1:04:03] Datapoint id 64 collected  
[1:04:03] Charge balance equation is out by -21.8%  
[1:04:03] Stirrer speed set to 60  
[1:04:08] pH 3.93 -> 4.13  
[1:04:08] Using cautious pH adjust  
[1:04:08] Dispensed 0.000376 mL of Base (0.5 M KOH)  
[1:04:13] Stepping pH = 4.00  
[1:04:13] Dispensed 0.000423 mL of Base (0.5 M KOH)  
[1:04:19] Stepping pH = 4.08  
[1:04:19] Dispensed 0.000188 mL of Base (0.5 M KOH)  
[1:04:24] Stepping pH = 4.11  
[1:04:24] Dispensed 0.000071 mL of Base (0.5 M KOH)  
[1:04:29] Stepping pH = 4.12  
[1:04:29] Dispensed 0.000094 mL of Base (0.5 M KOH)  
[1:04:34] Stepping pH = 4.13  
[1:04:49] Stirrer speed set to 0  
[1:04:59] Datapoint id 65 collected  
[1:04:59] Charge balance equation is out by -52.8%  
[1:04:59] Stirrer speed set to 60  
[1:05:04] pH 4.14 -> 4.34  
[1:05:04] Using cautious pH adjust  
[1:05:04] Dispensed 0.000259 mL of Base (0.5 M KOH)  
[1:05:09] Stepping pH = 4.20  
[1:05:09] Dispensed 0.000329 mL of Base (0.5 M KOH)  
[1:05:15] Stepping pH = 4.28  
[1:05:15] Dispensed 0.000141 mL of Base (0.5 M KOH)  
[1:05:20] Stepping pH = 4.30  
[1:05:20] Dispensed 0.000165 mL of Base (0.5 M KOH)  
[1:05:25] Stepping pH = 4.36

Sample name: **M09\_octanol**  
Assay name: **pH-metric high logP**  
Assay ID: **18C-03001**  
Filename: **C:\Sirius\_T3\Mehtap\20180302\_exp29\_logP\_T3-2\18C-03001\_M09\_octanol\_pH-metric high logP.t3r**

Experiment start time: **3/3/2018 12:18:26 AM**  
Analyst: **Pion**  
Instrument ID: **T312060**

## Experiment Log (continued)

[1:05:40] Stirrer speed set to 0  
[1:05:50] Datapoint id 66 collected  
[1:05:50] Charge balance equation is out by -68.3%  
[1:05:50] Stirrer speed set to 60  
[1:05:55] pH 4.36 -> 4.56  
[1:05:55] Using cautious pH adjust  
[1:05:55] Dispensed 0.000165 mL of Base (0.5 M KOH)  
[1:06:00] Stepping pH = 4.40  
[1:06:00] Dispensed 0.000353 mL of Base (0.5 M KOH)  
[1:06:06] Stepping pH = 4.54  
[1:06:06] Dispensed 0.000047 mL of Base (0.5 M KOH)  
[1:06:11] Stepping pH = 4.54  
[1:06:11] Dispensed 0.000094 mL of Base (0.5 M KOH)  
[1:06:16] Stepping pH = 4.57  
[1:06:31] Stirrer speed set to 0  
[1:06:47] Datapoint id 67 collected  
[1:06:47] Charge balance equation is out by -89.4%  
[1:06:47] Stirrer speed set to 60  
[1:06:52] pH 4.59 -> 4.79  
[1:06:52] Using cautious pH adjust  
[1:06:52] Dispensed 0.000118 mL of Base (0.5 M KOH)  
[1:06:57] Stepping pH = 4.63  
[1:06:57] Dispensed 0.000188 mL of Base (0.5 M KOH)  
[1:07:02] Stepping pH = 4.76  
[1:07:02] Dispensed 0.000024 mL of Base (0.5 M KOH)  
[1:07:07] Stepping pH = 4.76  
[1:07:08] Dispensed 0.000047 mL of Base (0.5 M KOH)  
[1:07:13] Stepping pH = 4.78  
[1:07:28] Stirrer speed set to 0  
[1:07:38] Datapoint id 68 collected  
[1:07:38] Charge balance equation is out by -71.7%  
[1:07:38] Stirrer speed set to 60  
[1:07:43] pH 4.79 -> 4.99  
[1:07:43] Using cautious pH adjust  
[1:07:43] Dispensed 0.000071 mL of Base (0.5 M KOH)  
[1:07:49] Stepping pH = 4.82  
[1:07:49] Dispensed 0.000141 mL of Base (0.5 M KOH)  
[1:07:54] Stepping pH = 4.99  
[1:08:09] Stirrer speed set to 0  
[1:08:20] Datapoint id 69 collected  
[1:08:20] Charge balance equation is out by -48.7%  
[1:08:20] Stirrer speed set to 60  
[1:08:25] pH 5.01 -> 5.21  
[1:08:25] Using cautious pH adjust  
[1:08:25] Dispensed 0.000047 mL of Base (0.5 M KOH)  
[1:08:30] Stepping pH = 5.01  
[1:08:30] Dispensed 0.000141 mL of Base (0.5 M KOH)  
[1:08:35] Stepping pH = 5.24  
[1:08:50] Stirrer speed set to 0  
[1:09:02] Datapoint id 70 collected  
[1:09:02] Charge balance equation is out by -94.7%  
[1:09:02] Stirrer speed set to 60  
[1:09:07] pH 5.27 -> 5.47  
[1:09:07] Using cautious pH adjust  
[1:09:07] Dispensed 0.000024 mL of Base (0.5 M KOH)  
[1:09:13] Stepping pH = 5.27  
[1:09:13] Dispensed 0.000094 mL of Base (0.5 M KOH)  
[1:09:18] Stepping pH = 5.39  
[1:09:18] Dispensed 0.000047 mL of Base (0.5 M KOH)



Sample name: **M09\_octanol**  
Assay name: **pH-metric high logP**  
Assay ID: **18C-03001**  
Filename: **C:\Sirius\_T3\Mehtap\20180302\_exp29\_logP\_T3-2\18C-03001\_M09\_octanol\_pH-metric high logP.t3r**

Experiment start time: **3/3/2018 12:18:26 AM**  
Analyst: **Pion**  
Instrument ID: **T312060**

## Experiment Log (continued)

[1:09:23] Stepping pH = 5.50  
[1:09:38] Stirrer speed set to 0  
[1:09:51] Datapoint id 71 collected  
[1:09:51] Charge balance equation is out by -168.0%  
[1:09:51] Stirrer speed set to 60  
[1:09:56] pH 5.56 -> 5.76  
[1:09:56] Using cautious pH adjust  
[1:09:56] Dispensed 0.000024 mL of Base (0.5 M KOH)  
[1:10:01] Stepping pH = 5.58  
[1:10:01] Dispensed 0.000071 mL of Base (0.5 M KOH)  
[1:10:06] Stepping pH = 5.86  
[1:10:22] Stirrer speed set to 0  
[1:10:38] Datapoint id 72 collected  
[1:10:38] Charge balance equation is out by -88.7%  
[1:10:38] Stirrer speed set to 60  
[1:10:43] pH 5.96 -> 6.16  
[1:10:43] Using cautious pH adjust  
[1:10:43] Dispensed 0.000024 mL of Base (0.5 M KOH)  
[1:10:48] Stepping pH = 5.98  
[1:10:48] Dispensed 0.000071 mL of Base (0.5 M KOH)  
[1:10:53] Stepping pH = 6.55  
[1:11:09] Stirrer speed set to 0  
[1:12:06] Datapoint id 73 collected  
[1:12:06] Charge balance equation is out by -84.8%  
[1:12:06] Stirrer speed set to 60  
[1:12:11] pH 6.50 -> 6.70  
[1:12:11] Using cautious pH adjust  
[1:12:11] Dispensed 0.000024 mL of Base (0.5 M KOH)  
[1:12:17] Stepping pH = 6.52  
[1:12:17] Dispensed 0.000047 mL of Base (0.5 M KOH)  
[1:12:22] Stepping pH = 6.85  
[1:12:37] Stirrer speed set to 0  
[1:13:37] Datapoint id 74 collected  
[1:13:37] Charge balance equation is out by -88.4%  
[1:13:37] Stirrer speed set to 60  
[1:13:42] pH 6.98 -> 7.18  
[1:13:42] Using cautious pH adjust  
[1:13:42] Dispensed 0.000024 mL of Base (0.5 M KOH)  
[1:13:47] Stepping pH = 7.04  
[1:13:47] Dispensed 0.000024 mL of Base (0.5 M KOH)  
[1:13:52] Stepping pH = 7.14  
[1:13:52] Dispensed 0.000024 mL of Base (0.5 M KOH)  
[1:13:57] Stepping pH = 7.42  
[1:14:12] Stirrer speed set to 0  
[1:15:12] Datapoint id 75 collected  
[1:15:12] Charge balance equation is out by -161.4%  
[1:15:12] Stirrer speed set to 60  
[1:15:18] pH 7.51 -> 7.71  
[1:15:18] Using cautious pH adjust  
[1:15:18] Dispensed 0.000024 mL of Base (0.5 M KOH)  
[1:15:23] Stepping pH = 7.56  
[1:15:23] Dispensed 0.000024 mL of Base (0.5 M KOH)  
[1:15:28] Stepping pH = 7.71  
[1:15:43] Stirrer speed set to 0  
[1:16:43] Datapoint id 76 collected  
[1:16:43] Charge balance equation is out by -306.0%  
[1:16:43] Stirrer speed set to 60  
[1:16:48] pH 7.94 -> 8.14  
[1:16:48] Using cautious pH adjust

Sample name: **M09\_octanol**  
Assay name: **pH-metric high logP**  
Assay ID: **18C-03001**  
Filename: **C:\Sirius\_T3\Mehtap\20180302\_exp29\_logP\_T3-2\18C-03001\_M09\_octanol\_pH-metric high logP.t3r**

Experiment start time: **3/3/2018 12:18:26 AM**  
Analyst: **Pion**  
Instrument ID: **T312060**

## Experiment Log (continued)

[1:16:48] Dispensed 0.000024 mL of Base (0.5 M KOH)  
[1:16:53] Stepping pH = 8.00  
[1:16:53] Dispensed 0.000024 mL of Base (0.5 M KOH)  
[1:16:58] Stepping pH = 8.19  
[1:17:13] Stirrer speed set to 0  
[1:18:13] Datapoint id 77 collected  
[1:18:13] Charge balance equation is out by -415.5%  
[1:18:13] Stirrer speed set to 60  
[1:18:18] pH 8.04 -> 8.24  
[1:18:18] Using cautious pH adjust  
[1:18:19] Dispensed 0.000024 mL of Base (0.5 M KOH)  
[1:18:24] Stepping pH = 8.02  
[1:18:24] Dispensed 0.000024 mL of Base (0.5 M KOH)  
[1:18:29] Stepping pH = 8.01  
[1:18:29] Dispensed 0.000118 mL of Base (0.5 M KOH)  
[1:18:34] Stepping pH = 8.74  
[1:18:49] Stirrer speed set to 0  
[1:19:22] Datapoint id 78 collected  
[1:19:22] Charge balance equation is out by -1,836.6%  
[1:19:22] Stirrer speed set to 60  
[1:19:27] pH 8.74 -> 8.94  
[1:19:27] Using cautious pH adjust  
[1:19:27] Dispensed 0.000024 mL of Base (0.5 M KOH)  
[1:19:32] Stepping pH = 8.74  
[1:19:32] Dispensed 0.000047 mL of Base (0.5 M KOH)  
[1:19:37] Stepping pH = 8.85  
[1:19:37] Dispensed 0.000024 mL of Base (0.5 M KOH)  
[1:19:42] Stepping pH = 8.90  
[1:19:42] Dispensed 0.000024 mL of Base (0.5 M KOH)  
[1:19:47] Stepping pH = 8.96  
[1:20:02] Stirrer speed set to 0  
[1:20:32] Datapoint id 79 collected  
[1:20:32] Charge balance equation is out by -287.6%  
[1:20:32] Stirrer speed set to 60  
[1:20:37] pH 8.98 -> 9.05  
[1:20:37] Using cautious pH adjust  
[1:20:38] Dispensed 0.000024 mL of Base (0.5 M KOH)  
[1:20:43] Stepping pH = 8.99  
[1:20:43] Dispensed 0.000024 mL of Base (0.5 M KOH)  
[1:20:48] Stepping pH = 9.02  
[1:21:03] Stirrer speed set to 0  
[1:21:16] Datapoint id 80 collected  
[1:21:16] Charge balance equation is out by -194.9%  
[1:21:16] Argon flow rate set to 0  
[1:21:20] Titrator arm moved over Titration position
