# Supplementary material for: Octanol-water partition coefficient measurements for the SAMPL6 Blind Prediction Challenge
Source: bioRxiv or medRxiv preprint supplement (doi:10.1101/757393), 2019-12-02
Supplement: Supplementary file [file media-2.zip]

Sample name: **M02\_octanol**  
 Assay name: **pH-metric high logP**  
 Assay ID: **18C-03012**  
 Filename: **C:\Sirius\_T3\Mehtap\20180302\_exp29\_logP\_T3-2\18C-03012\_M02\_octanol\_pH-metric high logP.t3r**

Experiment start time: **3/3/2018 3:08:32 PM**  
 Analyst: **Dorothy Levorse**  
 Instrument ID: **T312060**

## pH-metric Result

logP (XH +) 0.59 ±0.04 (n=50)  
 logP (neutral X) 4.03 ±0.01 (n=50)

### 18C-03012 Points 1 to 26

M02\_octanol concentration factor 0.955  
 Carbonate 0.2235 mM  
 Acidity error -1.42826 mM

### 18C-03012 Points 27 to 50

M02\_octanol concentration factor 0.892  
 Carbonate 0.1033 mM  
 Acidity error -1.59633 mM

### 18C-03012 Points 51 to 75

M02\_octanol concentration factor 1.218  
 Carbonate 0.1516 mM  
 Acidity error -1.31894 mM

## Warnings and errors

Errors None  
 Warnings None

## Sample logD and percent species

| pH     | M02_octanol<br>logD | M02_octanol<br>M02_octanolH | M02_octanol<br>M02_octanol | M02_octanol<br>M02_octanolH* | M02_octanol<br>M02_octanol* | Comment    |
|--------|---------------------|-----------------------------|----------------------------|------------------------------|-----------------------------|------------|
| 1.000  | 0.69                | 17.03 %                     | 0.00 %                     | 65.96 %                      | 17.01 %                     | Stomach pH |
| 1.200  | 0.74                | 15.49 %                     | 0.00 %                     | 59.99 %                      | 24.51 %                     |            |
| 2.000  | 1.14                | 6.73 %                      | 0.01 %                     | 26.06 %                      | 67.20 %                     |            |
| 3.000  | 2.01                | 0.95 %                      | 0.01 %                     | 3.70 %                       | 95.34 %                     |            |
| 4.000  | 2.96                | 0.10 %                      | 0.01 %                     | 0.39 %                       | 99.51 %                     |            |
| 5.000  | 3.71                | 0.01 %                      | 0.01 %                     | 0.04 %                       | 99.94 %                     | Blood pH   |
| 6.000  | 3.99                | 0.00 %                      | 0.01 %                     | 0.00 %                       | 99.99 %                     |            |
| 6.500  | 4.01                | 0.00 %                      | 0.01 %                     | 0.00 %                       | 99.99 %                     |            |
| 7.000  | 4.02                | 0.00 %                      | 0.01 %                     | 0.00 %                       | 99.99 %                     |            |
| 7.400  | 4.03                | 0.00 %                      | 0.01 %                     | 0.00 %                       | 99.99 %                     |            |
| 8.000  | 4.03                | 0.00 %                      | 0.01 %                     | 0.00 %                       | 99.99 %                     |            |
| 9.000  | 4.03                | 0.00 %                      | 0.01 %                     | 0.00 %                       | 99.99 %                     |            |
| 10.000 | 4.03                | 0.00 %                      | 0.01 %                     | 0.00 %                       | 99.99 %                     |            |
| 11.000 | 4.03                | 0.00 %                      | 0.01 %                     | 0.00 %                       | 99.99 %                     |            |
| 12.000 | 4.03                | 0.00 %                      | 0.01 %                     | 0.00 %                       | 99.99 %                     |            |

Sample name: **M02\_octanol**  
 Assay name: **pH-metric high logP**  
 Assay ID: **18C-03012**  
 Filename: **C:\Sirius\_T3\Mehtap\20180302\_exp29\_logP\_T3-2\18C-03012\_M02\_octanol\_pH-metric high logP.t3r**

Experiment start time: **3/3/2018 3:08:32 PM**  
 Analyst: **Dorothy Levorse**  
 Instrument ID: **T312060**

## Graphs

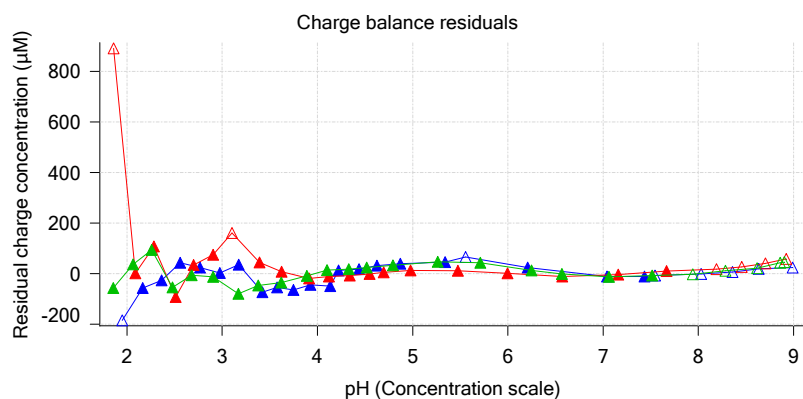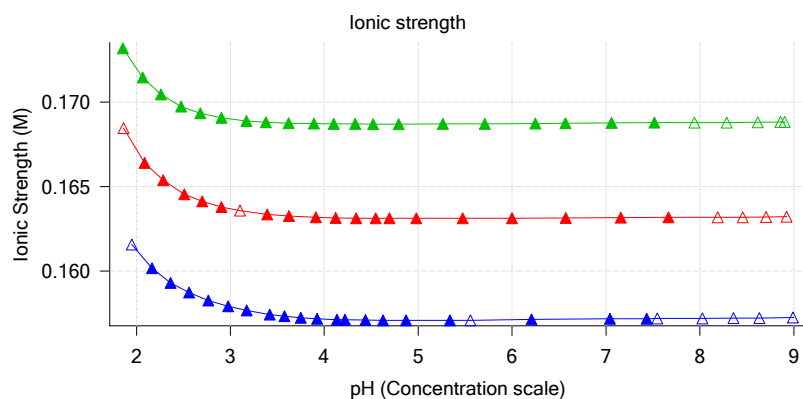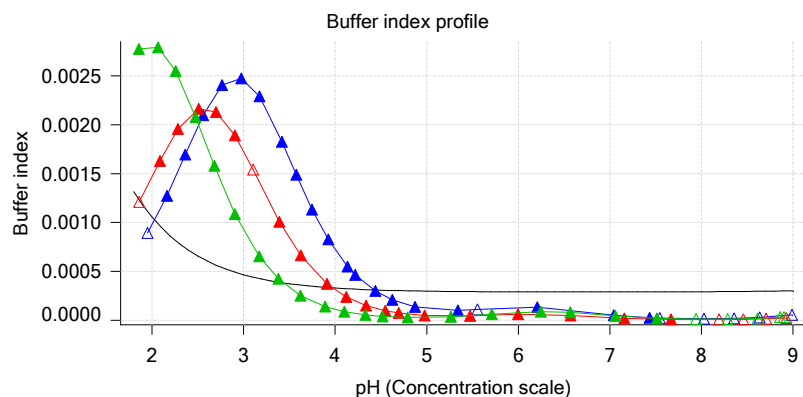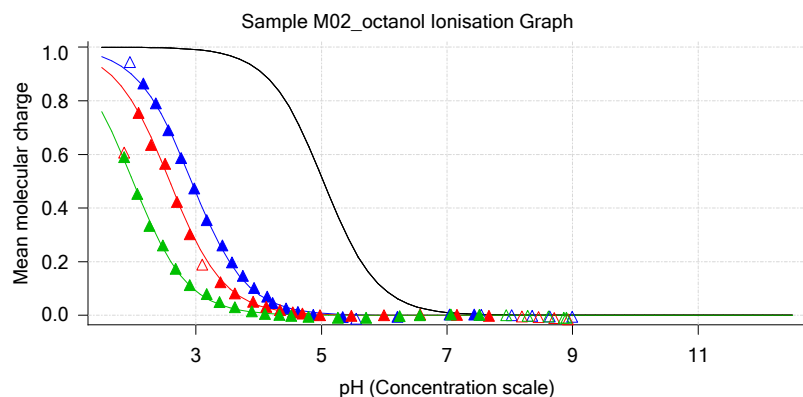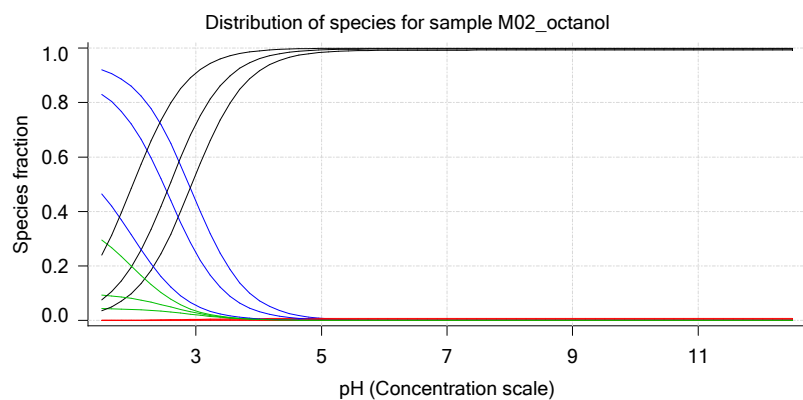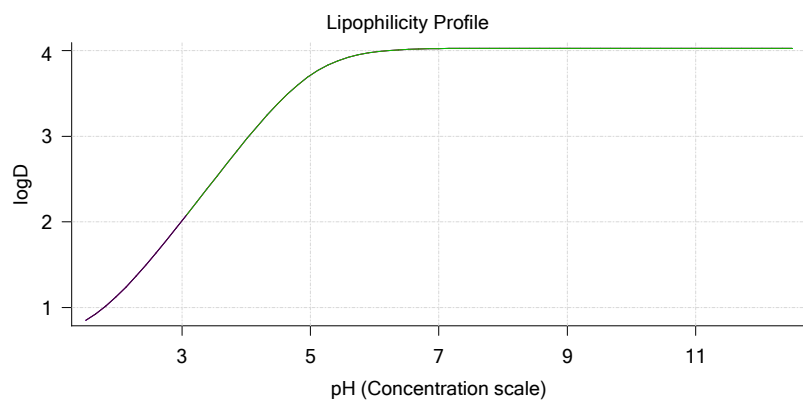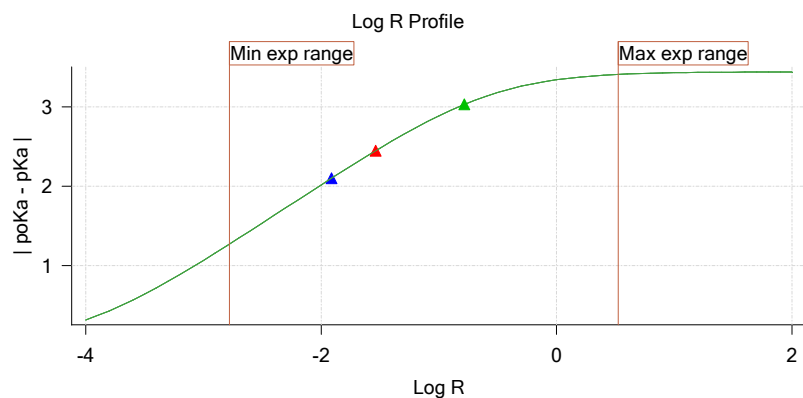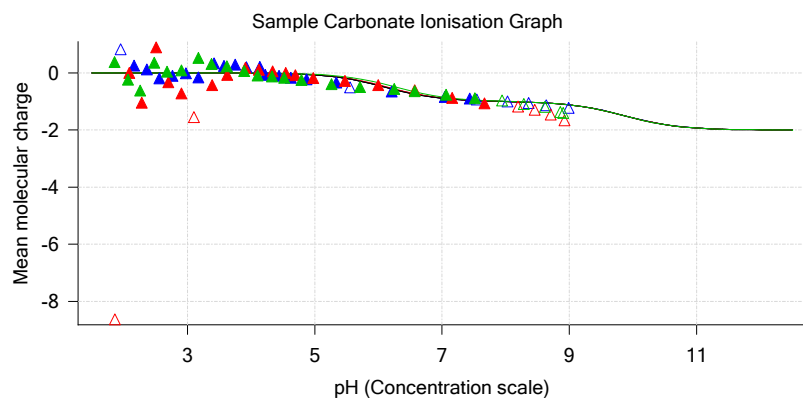

Sample name: **M02\_octanol**  
 Assay name: **pH-metric high logP**  
 Assay ID: **18C-03012**  
 Filename: **C:\Sirius\_T3\Mehtap\20180302\_exp29\_logP\_T3-2\18C-03012\_M02\_octanol\_pH-metric high logP.t3r**

Experiment start time: **3/3/2018 3:08:32 PM**  
 Analyst: **Dorothy Levorse**  
 Instrument ID: **T312060**

## Graphs (continued)

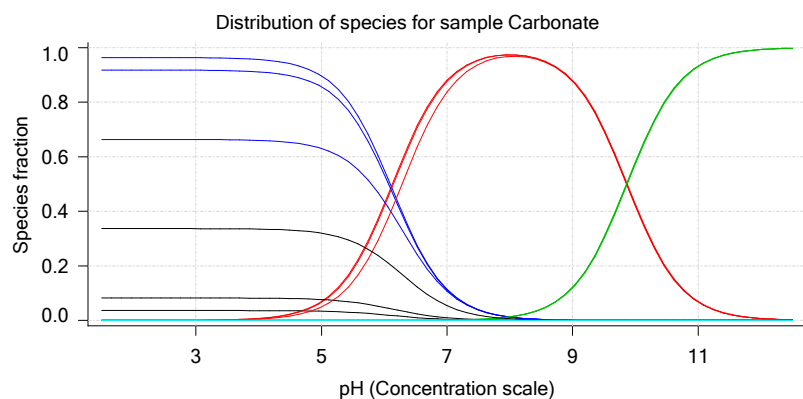

Sample name: **M02\_octanol**  
 Assay name: **pH-metric high logP**  
 Assay ID: **18C-03012**  
 Filename: **C:\Sirius\_T3\Mehtap\20180302\_exp29\_logP\_T3-2\18C-03012\_M02\_octanol\_pH-metric high logP.t3r**

Experiment start time: **3/3/2018 3:08:32 PM**  
 Analyst: **Dorothy Levorse**  
 Instrument ID: **T312060**

## pH-metric high logP Titration 1 of 3 18C-03012 Points 1 to 26

### Overall results

RMSD 0.169  
 Average ionic strength 0.158 M  
 Average temperature 24.9°C  
 Partition ratio 0.0123 : 1  
 Analyte concentration range 4430.5 µM to 4567.1 µM  
 Total points considered 19 of 26

### Warnings and errors

Errors None  
 Warnings Excessive acidity error present

### Four-Plus parameters

Alpha 0.111 3/3/2018 3:08:32 PM C:\Sirius\_T3\HCl18C02.t3r  
 S 0.9988 3/3/2018 3:08:32 PM C:\Sirius\_T3\HCl18C02.t3r  
 jH 1.0 3/3/2018 3:08:32 PM C:\Sirius\_T3\HCl18C02.t3r  
 jOH -0.8 3/3/2018 3:08:32 PM C:\Sirius\_T3\HCl18C02.t3r

### Titriments

0.50 M HCl 0.999058 3/3/2018 3:08:32 PM C:\Sirius\_T3\HCl18C02.t3r  
 0.50 M KOH 0.999845 3/3/2018 3:08:32 PM C:\Sirius\_T3\KOH18B27.t3r

### Sample

M02\_octanol concentration factor 0.955  
 Base pKa 1 5.03  
 logP (XH +) 1.12  
 logP (neutral X) 4.07

### Sample graphs

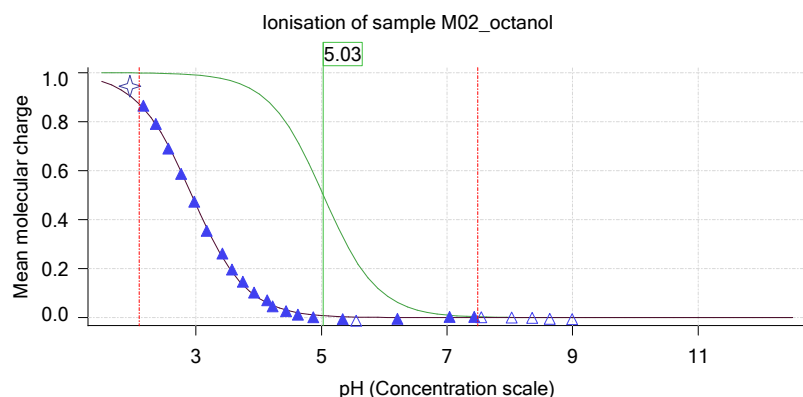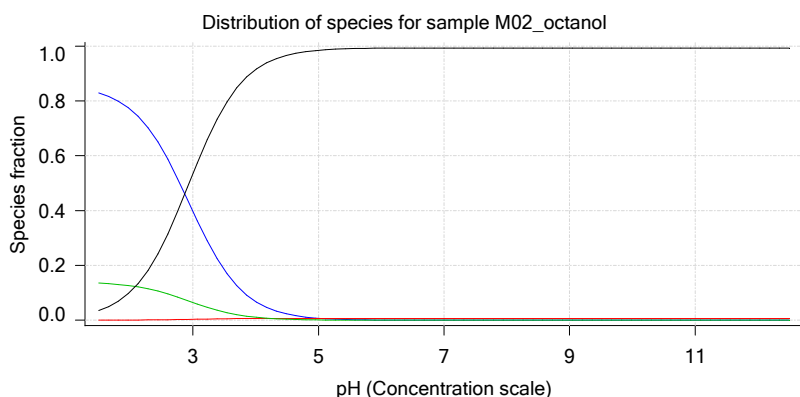

Sample name: **M02\_octanol**  
 Assay name: **pH-metric high logP**  
 Assay ID: **18C-03012**  
 Filename: **C:\Sirius\_T3\Mehtap\20180302\_exp29\_logP\_T3-2\18C-03012\_M02\_octanol\_pH-metric high logP.t3r**

Experiment start time: **3/3/2018 3:08:32 PM**  
 Analyst: **Dorothy Levorse**  
 Instrument ID: **T312060**

## Sample graphs (continued)

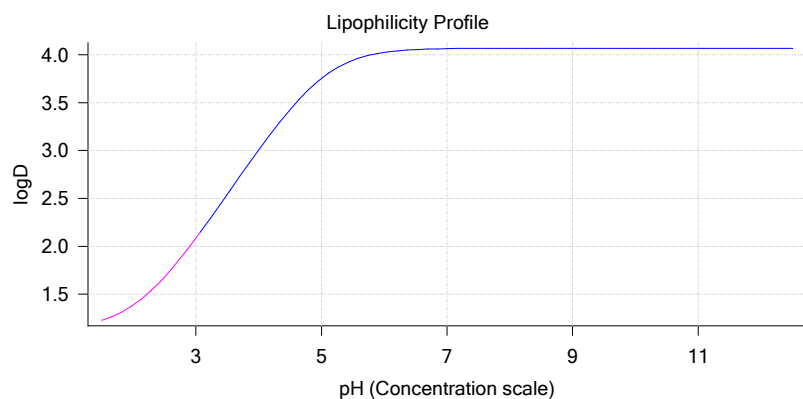

## Sample logD and percent species

| pH     | M02_octanol<br>logD | M02_octanol<br>M02_octanolH | M02_octanol<br>M02_octanolH | M02_octanol<br>M02_octanolH* | M02_octanol<br>M02_octanol* | Comment    |
|--------|---------------------|-----------------------------|-----------------------------|------------------------------|-----------------------------|------------|
| 1.000  | 1.16                | 84.96 %                     | 0.01 %                      | 13.89 %                      | 1.14 %                      | Stomach pH |
| 1.200  | 1.18                | 84.39 %                     | 0.01 %                      | 13.80 %                      | 1.79 %                      |            |
| 2.000  | 1.38                | 77.00 %                     | 0.07 %                      | 12.59 %                      | 10.33 %                     |            |
| 3.000  | 2.08                | 39.77 %                     | 0.37 %                      | 6.50 %                       | 53.36 %                     |            |
| 4.000  | 3.01                | 6.81 %                      | 0.64 %                      | 1.11 %                       | 91.44 %                     |            |
| 5.000  | 3.75                | 0.73 %                      | 0.68 %                      | 0.12 %                       | 98.46 %                     | Blood pH   |
| 6.000  | 4.02                | 0.07 %                      | 0.69 %                      | 0.01 %                       | 99.22 %                     |            |
| 6.500  | 4.05                | 0.02 %                      | 0.69 %                      | 0.00 %                       | 99.28 %                     |            |
| 7.000  | 4.06                | 0.01 %                      | 0.69 %                      | 0.00 %                       | 99.30 %                     |            |
| 7.400  | 4.07                | 0.00 %                      | 0.69 %                      | 0.00 %                       | 99.31 %                     |            |
| 8.000  | 4.07                | 0.00 %                      | 0.69 %                      | 0.00 %                       | 99.31 %                     |            |
| 9.000  | 4.07                | 0.00 %                      | 0.69 %                      | 0.00 %                       | 99.31 %                     |            |
| 10.000 | 4.07                | 0.00 %                      | 0.69 %                      | 0.00 %                       | 99.31 %                     |            |
| 11.000 | 4.07                | 0.00 %                      | 0.69 %                      | 0.00 %                       | 99.31 %                     |            |
| 12.000 | 4.07                | 0.00 %                      | 0.69 %                      | 0.00 %                       | 99.31 %                     |            |

## Carbonate and acidity

 Carbonate 0.223 mM  
 Acidity error -1.428 mM

## Other graphs

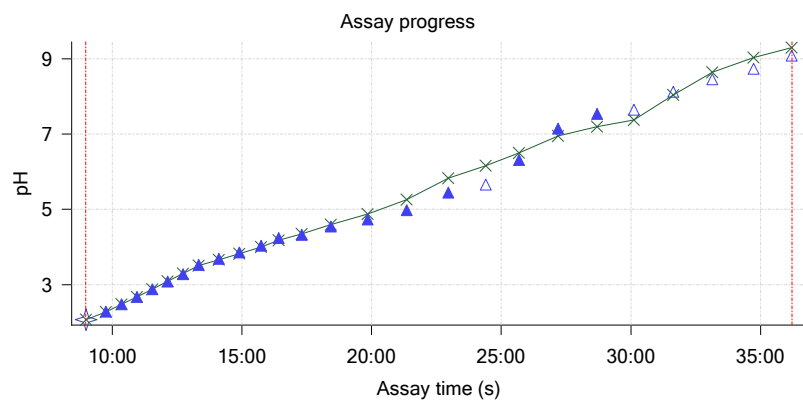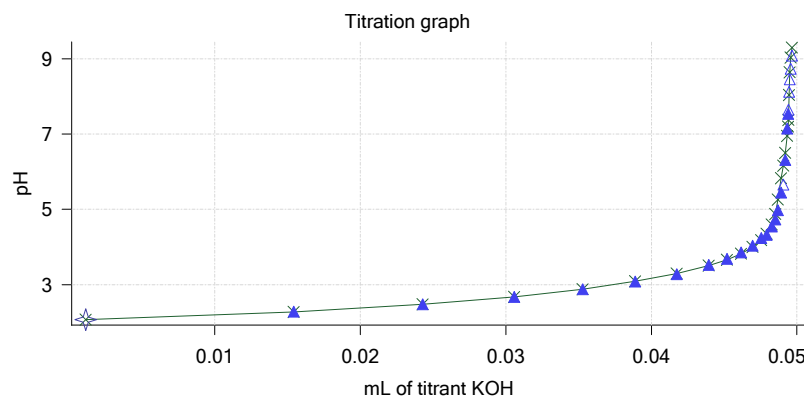

Sample name: **M02\_octanol**  
 Assay name: **pH-metric high logP**  
 Assay ID: **18C-03012**  
 Filename: **C:\Sirius\_T3\Mehtap\20180302\_exp29\_logP\_T3-2\18C-03012\_M02\_octanol\_pH-metric high logP.t3r**

Experiment start time: **3/3/2018 3:08:32 PM**  
 Analyst: **Dorothy Levorse**  
 Instrument ID: **T312060**

## Other graphs (continued)

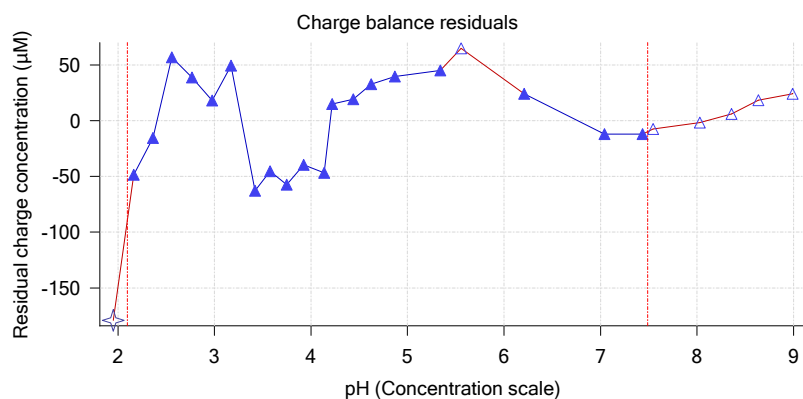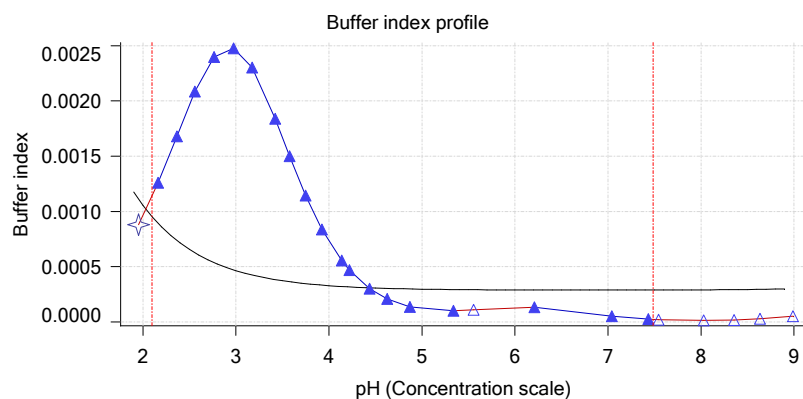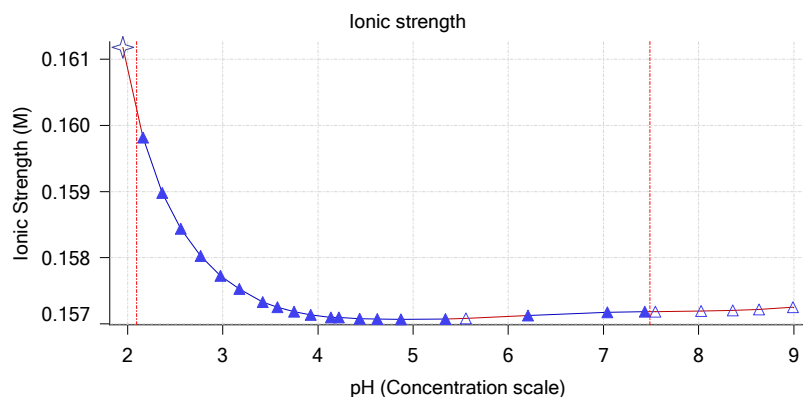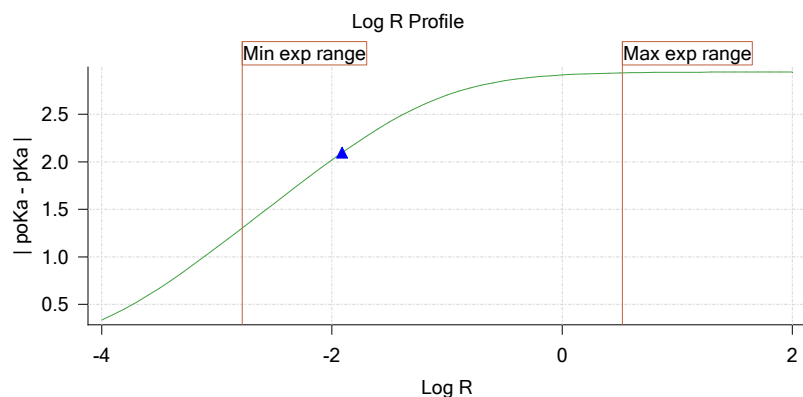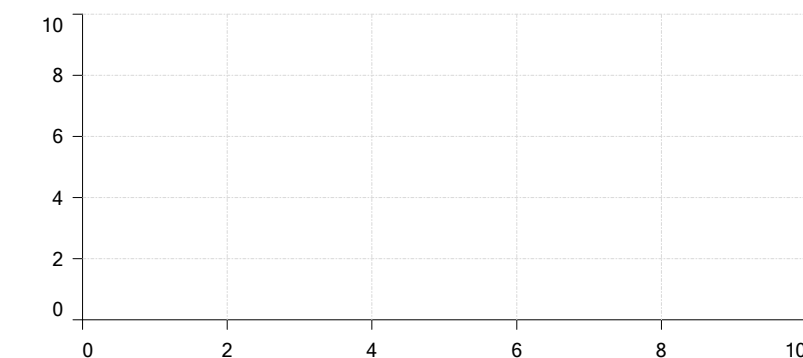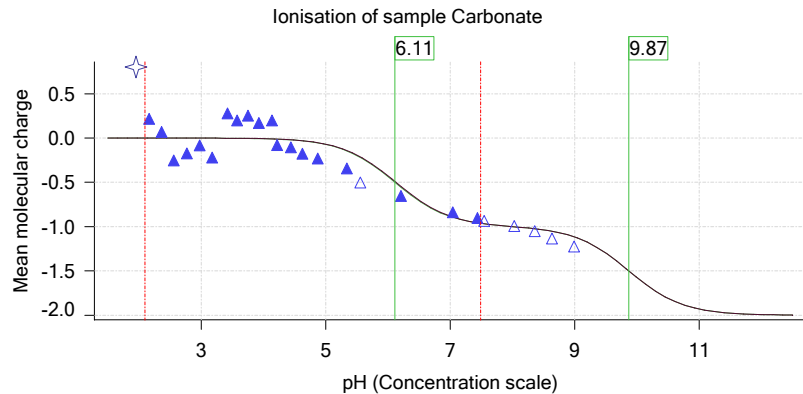

Sample name: **M02\_octanol**  
 Assay name: **pH-metric high logP**  
 Assay ID: **18C-03012**  
 Filename: **C:\Sirius\_T3\Mehtap\20180302\_exp29\_logP\_T3-2\18C-03012\_M02\_octanol\_pH-metric high logP.t3r**

Experiment start time: **3/3/2018 3:08:32 PM**  
 Analyst: **Dorothy Levorse**  
 Instrument ID: **T312060**

## pH-metric high logP Titration 2 of 3 18C-03012 Points 27 to 50

### Overall results

RMSD 0.235  
 Average ionic strength 0.163 M  
 Average temperature 25.0°C  
 Partition ratio 0.0290 : 1  
 Analyte concentration range 4080.4 µM to 4209.4 µM  
 Total points considered 18 of 24

### Warnings and errors

Errors None  
 Warnings Excessive acidity error present

### Four-Plus parameters

Alpha 0.111 3/3/2018 3:08:32 PM C:\Sirius\_T3\HCl18C02.t3r  
 S 0.9988 3/3/2018 3:08:32 PM C:\Sirius\_T3\HCl18C02.t3r  
 jH 1.0 3/3/2018 3:08:32 PM C:\Sirius\_T3\HCl18C02.t3r  
 jOH -0.8 3/3/2018 3:08:32 PM C:\Sirius\_T3\HCl18C02.t3r

### Titrants

0.50 M HCl 0.999058 3/3/2018 3:08:32 PM C:\Sirius\_T3\HCl18C02.t3r  
 0.50 M KOH 0.999845 3/3/2018 3:08:32 PM C:\Sirius\_T3\KOH18B27.t3r

### Sample

M02\_octanol concentration factor 0.892  
 Base pKa 1 5.03  
 logP (XH +) 1.47  
 logP (neutral X) 4.27

### Sample graphs

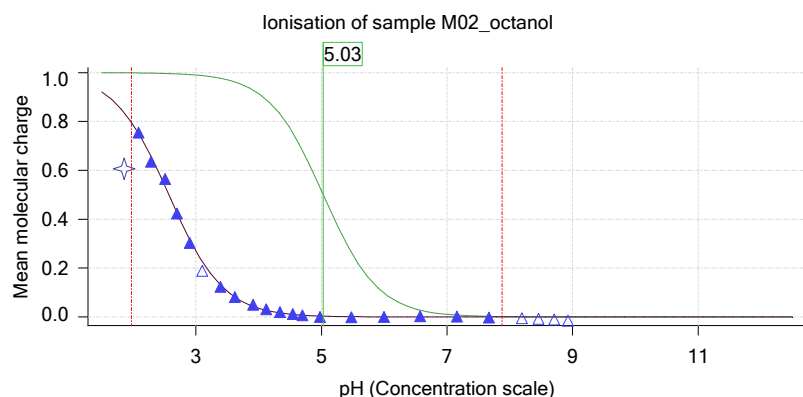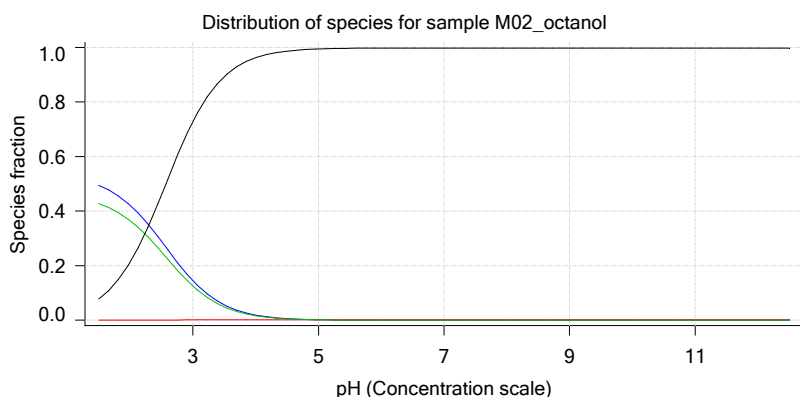

Sample name: **M02\_octanol**  
Assay name: **pH-metric high logP**  
Assay ID: **18C-03012**  
Filename: **C:\Sirius\_T3\Mehtap\20180302\_exp29\_logP\_T3-2\18C-03012\_M02\_octanol\_pH-metric high logP.t3r**

Experiment start time: **3/3/2018 3:08:32 PM**  
Analyst: **Dorothy Leverse**  
Instrument ID: **T312060**

## Sample graphs (continued)

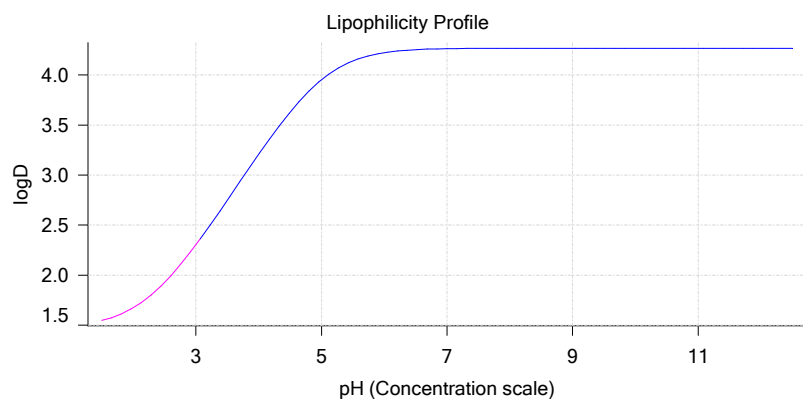

## Sample logD and percent species

| pH     | M02_octanol<br>logD | M02_octanol<br>M02_octanolH | M02_octanol<br>M02_octanolH | M02_octanol<br>M02_octanolH* | M02_octanol<br>M02_octanol* | Comment    |
|--------|---------------------|-----------------------------|-----------------------------|------------------------------|-----------------------------|------------|
| 1.000  | 1.50                | 52.20 %                     | 0.00 %                      | 45.17 %                      | 2.62 %                      |            |
| 1.200  | 1.51                | 51.41 %                     | 0.01 %                      | 44.49 %                      | 4.09 %                      | Stomach pH |
| 2.000  | 1.67                | 42.22 %                     | 0.04 %                      | 36.54 %                      | 21.21 %                     |            |
| 3.000  | 2.30                | 14.50 %                     | 0.14 %                      | 12.55 %                      | 72.82 %                     |            |
| 4.000  | 3.21                | 1.92 %                      | 0.18 %                      | 1.66 %                       | 96.25 %                     |            |
| 5.000  | 3.95                | 0.20 %                      | 0.18 %                      | 0.17 %                       | 99.45 %                     |            |
| 6.000  | 4.22                | 0.02 %                      | 0.19 %                      | 0.02 %                       | 99.78 %                     | Blood pH   |
| 6.500  | 4.25                | 0.01 %                      | 0.19 %                      | 0.01 %                       | 99.80 %                     |            |
| 7.000  | 4.26                | 0.00 %                      | 0.19 %                      | 0.00 %                       | 99.81 %                     |            |
| 7.400  | 4.27                | 0.00 %                      | 0.19 %                      | 0.00 %                       | 99.81 %                     |            |
| 8.000  | 4.27                | 0.00 %                      | 0.19 %                      | 0.00 %                       | 99.81 %                     |            |
| 9.000  | 4.27                | 0.00 %                      | 0.19 %                      | 0.00 %                       | 99.81 %                     |            |
| 10.000 | 4.27                | 0.00 %                      | 0.19 %                      | 0.00 %                       | 99.81 %                     |            |
| 11.000 | 4.27                | 0.00 %                      | 0.19 %                      | 0.00 %                       | 99.81 %                     |            |
| 12.000 | 4.27                | 0.00 %                      | 0.19 %                      | 0.00 %                       | 99.81 %                     |            |

## Carbonate and acidity

Carbonate 0.103 mM  
Acidity error -1.596 mM

## Other graphs

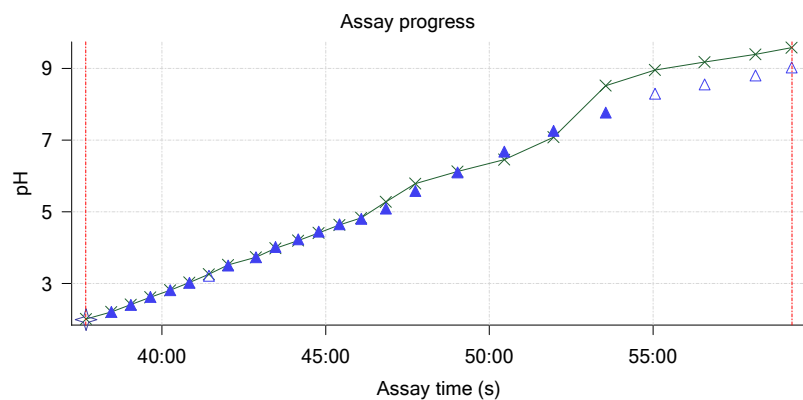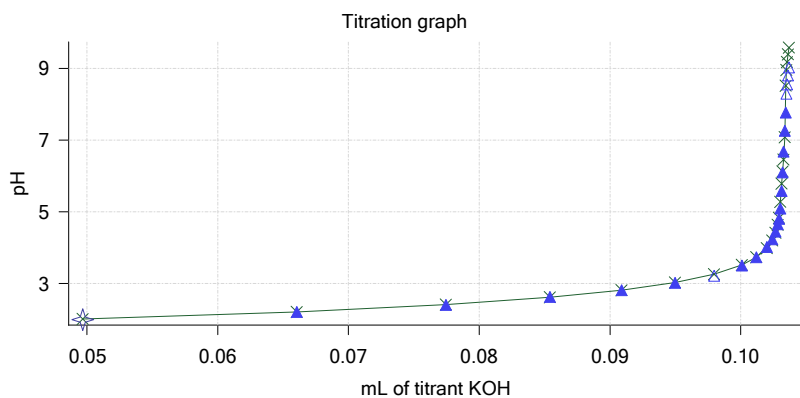



Sample name: **M02\_octanol**  
 Assay name: **pH-metric high logP**  
 Assay ID: **18C-03012**  
 Filename: **C:\Sirius\_T3\Mehtap\20180302\_exp29\_logP\_T3-2\18C-03012\_M02\_octanol\_pH-metric high logP.t3r**

Experiment start time: **3/3/2018 3:08:32 PM**  
 Analyst: **Dorothy Leverse**  
 Instrument ID: **T312060**

## Other graphs (continued)

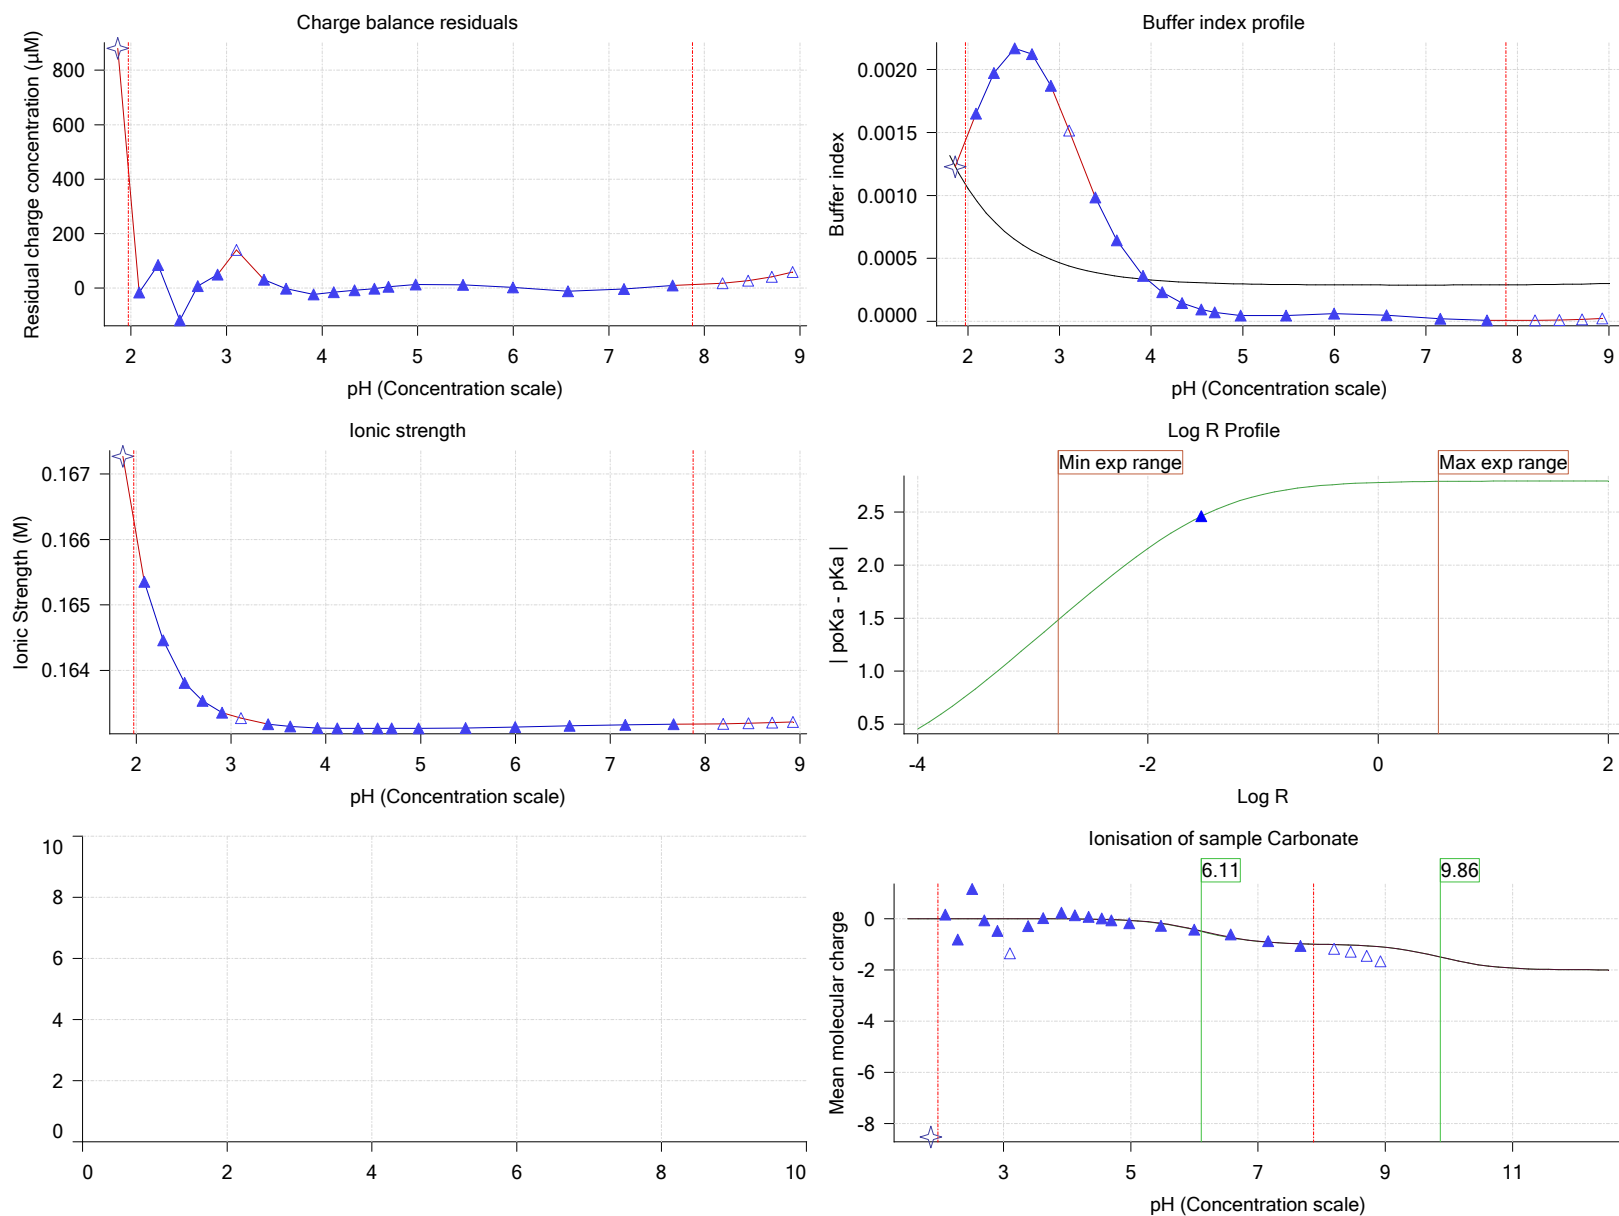

Sample name: **M02\_octanol**  
 Assay name: **pH-metric high logP**  
 Assay ID: **18C-03012**  
 Filename: **C:\Sirius\_T3\Mehtap\20180302\_exp29\_logP\_T3-2\18C-03012\_M02\_octanol\_pH-metric high logP.t3r**

Experiment start time: **3/3/2018 3:08:32 PM**  
 Analyst: **Dorothy Levorse**  
 Instrument ID: **T312060**

pH-metric high logP Titration 3 of 3 18C-03012 Points 51 to 75

## Overall results

RMSD 0.321  
 Average ionic strength 0.169 M  
 Average temperature 25.0°C  
 Partition ratio 0.1643 : 1  
 Analyte concentration range 3372.3 µM to 3470.6 µM  
 Total points considered 20 of 25

## Warnings and errors

Errors None  
 Warnings Excessive acidity error present

## Four-Plus parameters

Alpha 0.111 3/3/2018 3:08:32 PM C:\Sirius\_T3\HCl18C02.t3r  
 S 0.9988 3/3/2018 3:08:32 PM C:\Sirius\_T3\HCl18C02.t3r  
 jH 1.0 3/3/2018 3:08:32 PM C:\Sirius\_T3\HCl18C02.t3r  
 jOH -0.8 3/3/2018 3:08:32 PM C:\Sirius\_T3\HCl18C02.t3r

## Titrants

0.50 M HCl 0.999058 3/3/2018 3:08:32 PM C:\Sirius\_T3\HCl18C02.t3r  
 0.50 M KOH 0.999845 3/3/2018 3:08:32 PM C:\Sirius\_T3\KOH18B27.t3r

## Sample

M02\_octanol concentration factor 1.218  
 Base pKa 1 5.03  
 logP (XH +) 1.33  
 logP (neutral X) 4.47

## Sample graphs

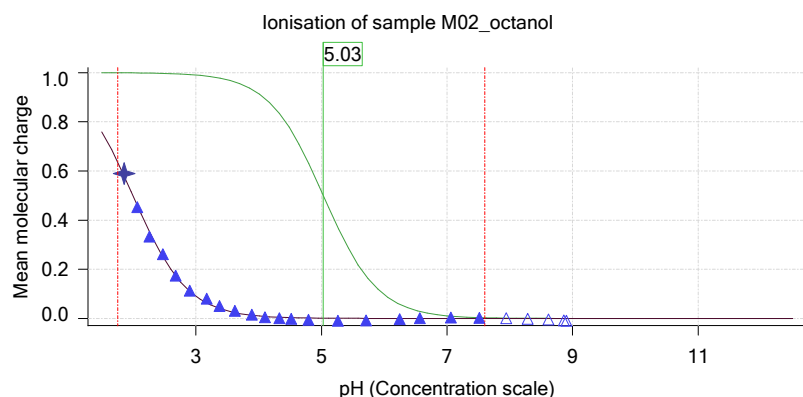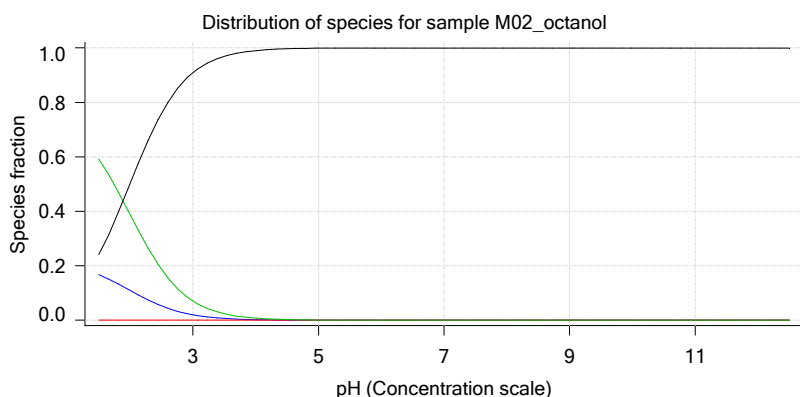

Sample name: **M02\_octanol**  
 Assay name: **pH-metric high logP**  
 Assay ID: **18C-03012**  
 Filename: **C:\Sirius\_T3\Mehtap\20180302\_exp29\_logP\_T3-2\18C-03012\_M02\_octanol\_pH-metric high logP.t3r**

Experiment start time: **3/3/2018 3:08:32 PM**  
 Analyst: **Dorothy Levorse**  
 Instrument ID: **T312060**

## Sample graphs (continued)

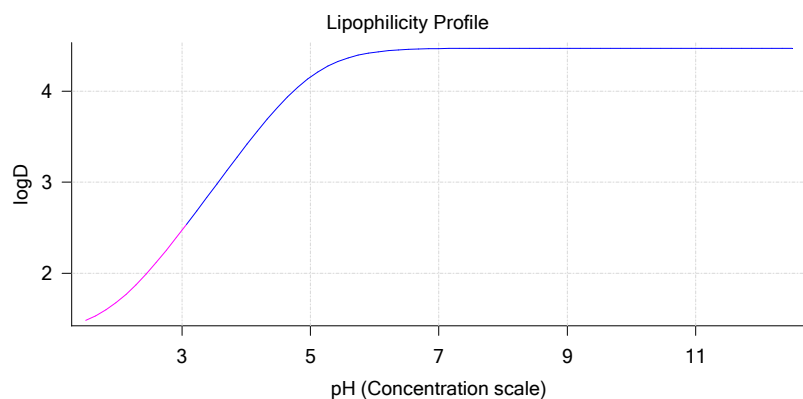

## Sample logD and percent species

| pH     | M02_octanol<br>logD | M02_octanol<br>M02_octanolH | M02_octanol<br>M02_octanolH | M02_octanol<br>M02_octanolH* | M02_octanol<br>M02_octanol* | Comment    |
|--------|---------------------|-----------------------------|-----------------------------|------------------------------|-----------------------------|------------|
| 1.000  | 1.39                | 20.05 %                     | 0.00 %                      | 70.82 %                      | 9.14 %                      | Stomach pH |
| 1.200  | 1.41                | 19.03 %                     | 0.00 %                      | 67.22 %                      | 13.74 %                     |            |
| 2.000  | 1.69                | 11.00 %                     | 0.01 %                      | 38.86 %                      | 50.13 %                     |            |
| 3.000  | 2.47                | 2.00 %                      | 0.02 %                      | 7.05 %                       | 90.94 %                     |            |
| 4.000  | 3.41                | 0.22 %                      | 0.02 %                      | 0.77 %                       | 99.00 %                     |            |
| 5.000  | 4.16                | 0.02 %                      | 0.02 %                      | 0.08 %                       | 99.88 %                     | Blood pH   |
| 6.000  | 4.43                | 0.00 %                      | 0.02 %                      | 0.01 %                       | 99.97 %                     |            |
| 6.500  | 4.46                | 0.00 %                      | 0.02 %                      | 0.00 %                       | 99.98 %                     |            |
| 7.000  | 4.47                | 0.00 %                      | 0.02 %                      | 0.00 %                       | 99.98 %                     |            |
| 7.400  | 4.47                | 0.00 %                      | 0.02 %                      | 0.00 %                       | 99.98 %                     |            |
| 8.000  | 4.47                | 0.00 %                      | 0.02 %                      | 0.00 %                       | 99.98 %                     |            |
| 9.000  | 4.47                | 0.00 %                      | 0.02 %                      | 0.00 %                       | 99.98 %                     |            |
| 10.000 | 4.47                | 0.00 %                      | 0.02 %                      | 0.00 %                       | 99.98 %                     |            |
| 11.000 | 4.47                | 0.00 %                      | 0.02 %                      | 0.00 %                       | 99.98 %                     |            |
| 12.000 | 4.47                | 0.00 %                      | 0.02 %                      | 0.00 %                       | 99.98 %                     |            |

## Carbonate and acidity

Carbonate 0.152 mM  
 Acidity error -1.319 mM

## Other graphs

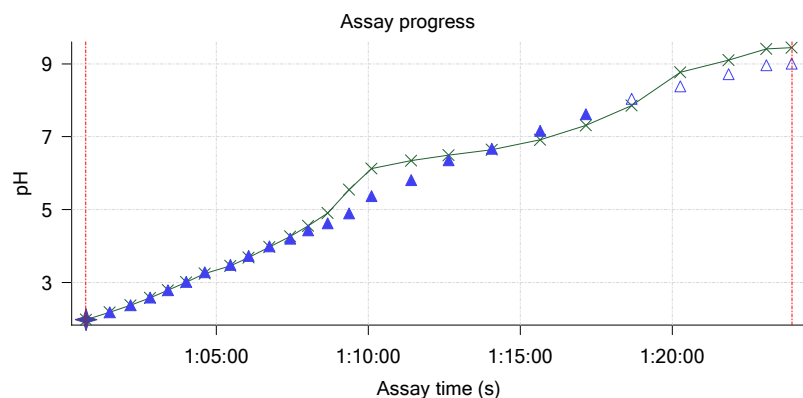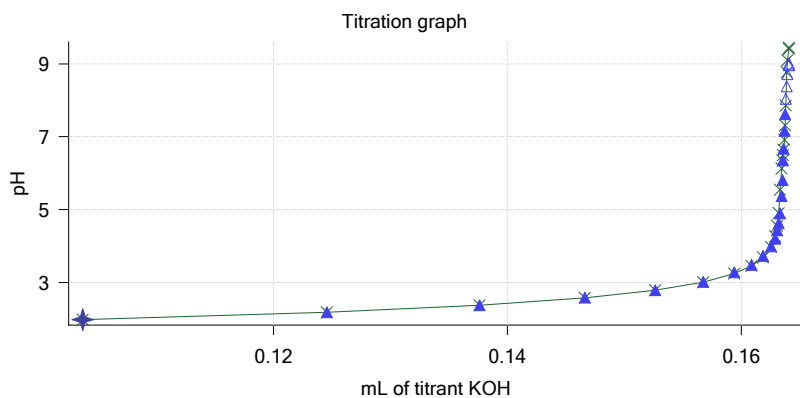

Sample name: **M02\_octanol**  
 Assay name: **pH-metric high logP**  
 Assay ID: **18C-03012**  
 Filename: **C:\Sirius\_T3\Mehtap\20180302\_exp29\_logP\_T3-2\18C-03012\_M02\_octanol\_pH-metric high logP.t3r**

Experiment start time: **3/3/2018 3:08:32 PM**  
 Analyst: **Dorothy Levorse**  
 Instrument ID: **T312060**

## Other graphs (continued)

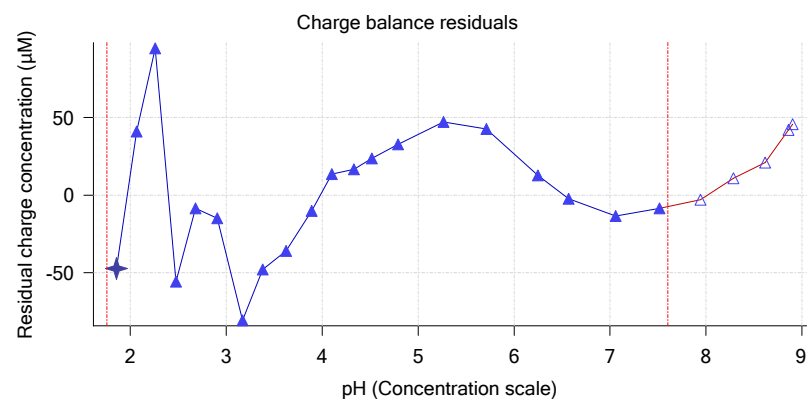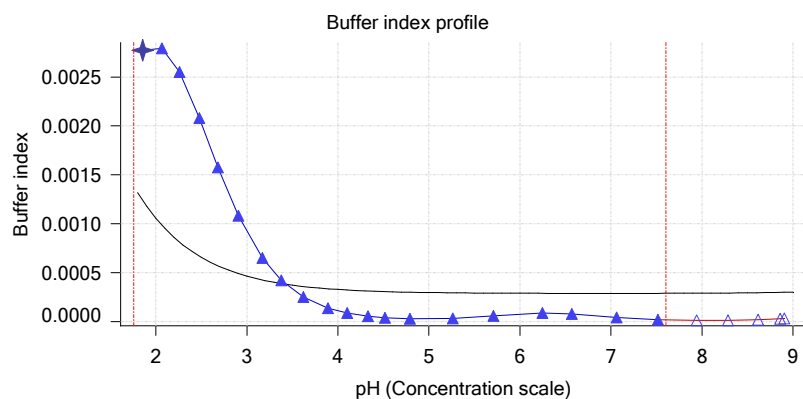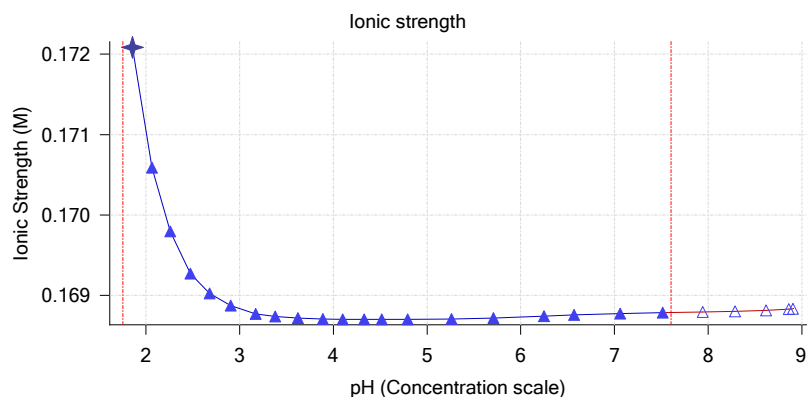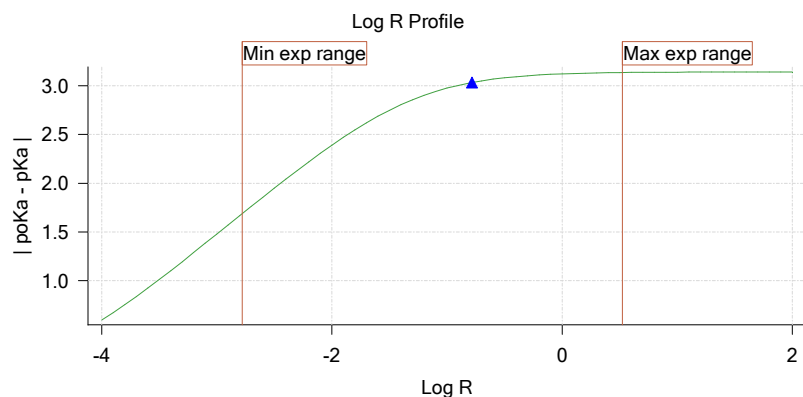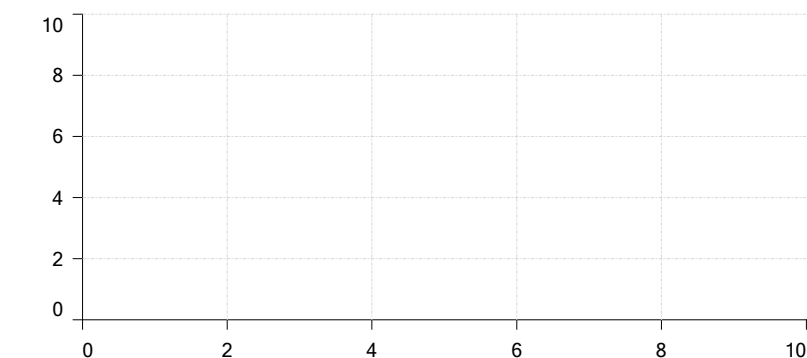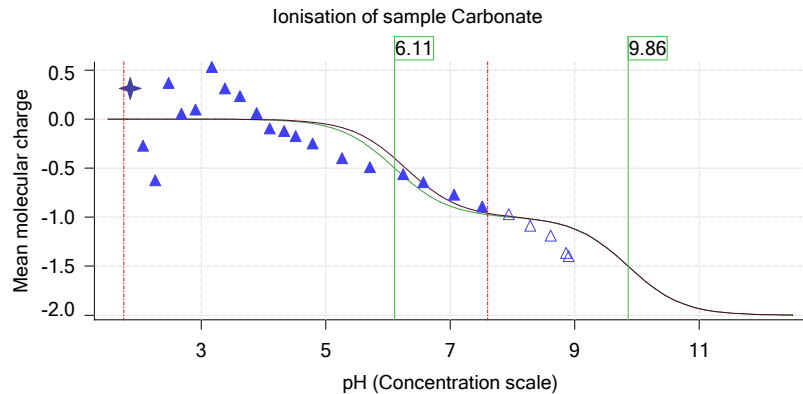

Sample name: **M02\_octanol**  
 Assay name: **pH-metric high logP**  
 Assay ID: **18C-03012**  
 Filename: **C:\Sirius\_T3\Mehtap\20180302\_exp29\_logP\_T3-2\18C-03012\_M02\_octanol\_pH-metric high logP.t3r**

Experiment start time: **3/3/2018 3:08:32 PM**  
 Analyst: **Dorothy Levorse**  
 Instrument ID: **T312060**

## Assay Model

| Settings                          | Value        | Date/Time changed    | Imported from      |
|-----------------------------------|--------------|----------------------|--------------------|
| Sample name                       | M02_octanol  | 12/6/2017 4:20:03 PM | User entered value |
| Sample by                         | Weight       |                      | Default value      |
| Sample weight                     | 0.002080 g   | 3/2/2018 5:10:06 PM  | User entered value |
| Formula weight                    | 289.26 g/mol | 12/6/2017 4:20:03 PM | User entered value |
| Solubility                        | Unknown      |                      | Default value      |
| Molecular weight                  | 289.26       | 12/6/2017 4:20:03 PM | User entered value |
| Individual pKa ionic environments | No           |                      | Default value      |
| Number of pKas                    | 1            | 12/6/2017 4:20:03 PM | User entered value |
| Sample is a                       | Base         | 12/6/2017 4:20:03 PM | User entered value |
| pKa 1                             | 5.03         | 12/6/2017 4:20:03 PM | User entered value |
| logp (XH +)                       | 1.32         | 3/2/2018 3:38:13 PM  | User entered value |
| logP (neutral X)                  | 4.10         | 3/2/2018 3:38:07 PM  | User entered value |

## Events

| Time    | Event             | Water      | Acid       | Base       | Octanol    | pH    | dpH/dt   | pH R-squared | pH SD   | dpH/dt time         |
|---------|-------------------|------------|------------|------------|------------|-------|----------|--------------|---------|---------------------|
| 5:59.7  | Initial pH = 9.32 |            |            |            |            |       |          |              |         |                     |
| 8:59.2  | Data point 1      | 1.50000 mL | 0.05336 mL | 0.00113 mL | 0.01999 mL | 2.071 | 0.00065  | 0.01575      | 0.00025 | 10.0 s              |
| 9:45.5  | Data point 2      | 1.50000 mL | 0.05336 mL | 0.01543 mL | 0.01999 mL | 2.279 | 0.00438  | 0.13165      | 0.00060 | 10.0 s              |
| 10:21.2 | Data point 3      | 1.50000 mL | 0.05336 mL | 0.02429 mL | 0.01999 mL | 2.476 | -0.00354 | 0.41455      | 0.00027 | 10.5 s              |
| 10:57.3 | Data point 4      | 1.50000 mL | 0.05336 mL | 0.03057 mL | 0.01999 mL | 2.669 | -0.00471 | 0.73726      | 0.00027 | 10.0 s              |
| 11:32.8 | Data point 5      | 1.50000 mL | 0.05336 mL | 0.03528 mL | 0.01999 mL | 2.875 | -0.00270 | 0.03691      | 0.00069 | 10.0 s              |
| 12:08.2 | Data point 6      | 1.50000 mL | 0.05336 mL | 0.03890 mL | 0.01999 mL | 3.083 | -0.01251 | 0.86143      | 0.00067 | 10.0 s              |
| 12:43.7 | Data point 7      | 1.50000 mL | 0.05336 mL | 0.04175 mL | 0.01999 mL | 3.280 | -0.01215 | 0.94698      | 0.00062 | 10.5 s              |
| 13:19.6 | Data point 8      | 1.50000 mL | 0.05336 mL | 0.04396 mL | 0.01999 mL | 3.527 | -0.01947 | 0.93803      | 0.00099 | 11.0 s              |
| 14:06.4 | Data point 9      | 1.50000 mL | 0.05336 mL | 0.04520 mL | 0.01999 mL | 3.683 | -0.01786 | 0.92590      | 0.00092 | 11.5 s              |
| 14:53.7 | Data point 10     | 1.50000 mL | 0.05336 mL | 0.04617 mL | 0.01999 mL | 3.855 | -0.01936 | 0.96090      | 0.00098 | 14.5 s              |
| 15:44.0 | Data point 11     | 1.50000 mL | 0.05336 mL | 0.04697 mL | 0.01999 mL | 4.031 | -0.01779 | 0.90907      | 0.00092 | 15.5 s              |
| 16:24.9 | Data point 12     | 1.50000 mL | 0.05336 mL | 0.04755 mL | 0.01999 mL | 4.242 | -0.01825 | 0.89567      | 0.00095 | 28.0 s              |
| 17:18.3 | Data point 13     | 1.50000 mL | 0.05336 mL | 0.04793 mL | 0.01999 mL | 4.326 | -0.01954 | 0.97542      | 0.00098 | 36.5 s              |
| 18:25.4 | Data point 14     | 1.50000 mL | 0.05336 mL | 0.04828 mL | 0.01999 mL | 4.543 | -0.01825 | 0.97150      | 0.00091 | 55.0 s              |
| 19:50.9 | Data point 15     | 1.50000 mL | 0.05336 mL | 0.04852 mL | 0.01999 mL | 4.730 | -0.02010 | 0.91878      | 0.00103 | Timed out at 59.5 s |
| 21:21.5 | Data point 16     | 1.50000 mL | 0.05336 mL | 0.04871 mL | 0.01999 mL | 4.975 | -0.02384 | 0.95065      | 0.00121 | Timed out at 59.5 s |
| 22:57.2 | Data point 17     | 1.50000 mL | 0.05336 mL | 0.04892 mL | 0.01999 mL | 5.443 | -0.01935 | 0.93030      | 0.00099 | 56.0 s              |
| 24:23.8 | Data point 18     | 1.50000 mL | 0.05336 mL | 0.04906 mL | 0.01999 mL | 5.658 | -0.01989 | 0.98952      | 0.00099 | 46.5 s              |
| 25:40.9 | Data point 19     | 1.50000 mL | 0.05336 mL | 0.04920 mL | 0.01999 mL | 6.311 | -0.02340 | 0.95639      | 0.00118 | Timed out at 59.5 s |
| 27:11.5 | Data point 20     | 1.50000 mL | 0.05336 mL | 0.04934 mL | 0.01999 mL | 7.143 | -0.06220 | 0.99094      | 0.00309 | Timed out at 59.5 s |
| 28:41.9 | Data point 21     | 1.50000 mL | 0.05336 mL | 0.04939 mL | 0.01999 mL | 7.536 | -0.06100 | 0.98752      | 0.00303 | Timed out at 59.5 s |
| 30:07.3 | Data point 22     | 1.50000 mL | 0.05336 mL | 0.04941 mL | 0.01999 mL | 7.646 | -0.04673 | 0.98883      | 0.00232 | Timed out at 59.5 s |
| 31:37.8 | Data point 23     | 1.50000 mL | 0.05336 mL | 0.04946 mL | 0.01999 mL | 8.129 | -0.05480 | 0.98555      | 0.00273 | Timed out at 59.5 s |
| 33:08.3 | Data point 24     | 1.50000 mL | 0.05336 mL | 0.04951 mL | 0.01999 mL | 8.458 | -0.03117 | 0.96668      | 0.00157 | Timed out at 59.5 s |
| 34:43.9 | Data point 25     | 1.50000 mL | 0.05336 mL | 0.04958 mL | 0.01999 mL | 8.734 | -0.01915 | 0.91772      | 0.00099 | 57.5 s              |
| 36:12.1 | Data point 26     | 1.50000 mL | 0.05336 mL | 0.04967 mL | 0.01999 mL | 9.090 | -0.01873 | 0.92804      | 0.00096 | 35.5 s              |
| 37:41.3 | Data point 27     | 1.50000 mL | 0.10861 mL | 0.04967 mL | 0.05000 mL | 1.983 | -0.00848 | 0.30185      | 0.00076 | 10.0 s              |
| 38:27.6 | Data point 28     | 1.50000 mL | 0.10861 mL | 0.06604 mL | 0.05000 mL | 2.203 | -0.01236 | 0.74273      | 0.00071 | 10.0 s              |
| 39:03.3 | Data point 29     | 1.50000 mL | 0.10861 mL | 0.07745 mL | 0.05000 mL | 2.397 | -0.00234 | 0.07442      | 0.00042 | 10.0 s              |
| 39:38.9 | Data point 30     | 1.50000 mL | 0.10861 mL | 0.08540 mL | 0.05000 mL | 2.621 | -0.00166 | 0.44144      | 0.00012 | 10.5 s              |
| 40:15.0 | Data point 31     | 1.50000 mL | 0.10861 mL | 0.09087 mL | 0.05000 mL | 2.809 | -0.00504 | 0.92869      | 0.00026 | 10.0 s              |
| 40:50.5 | Data point 32     | 1.50000 mL | 0.10861 mL | 0.09497 mL | 0.05000 mL | 3.014 | -0.00539 | 0.66005      | 0.00033 | 10.0 s              |

Sample name: **M02\_octanol**  
 Assay name: **pH-metric high logP**  
 Assay ID: **18C-03012**  
 Filename: **C:\Sirius\_T3\Mehtap\20180302\_exp29\_logP\_T3-2\18C-03012\_M02\_octanol\_pH-metric high logP.t3r**

Experiment start time: **3/3/2018 3:08:32 PM**  
 Analyst: **Dorothy Levorse**  
 Instrument ID: **T312060**

## Events (continued)

| Time      | Event         | Water      | Acid       | Base       | Octanol    | pH    | dpH/dt   | pH R-squared | pH SD   | dpH/dt time         |
|-----------|---------------|------------|------------|------------|------------|-------|----------|--------------|---------|---------------------|
| 41:26.0   | Data point 33 | 1.50000 mL | 0.10861 mL | 0.09795 mL | 0.05000 mL | 3.211 | -0.00572 | 0.74071      | 0.00033 | 10.0 s              |
| 42:01.6   | Data point 34 | 1.50000 mL | 0.10861 mL | 0.10009 mL | 0.05000 mL | 3.497 | -0.01360 | 0.48807      | 0.00096 | 10.0 s              |
| 42:52.5   | Data point 35 | 1.50000 mL | 0.10861 mL | 0.10120 mL | 0.05000 mL | 3.730 | 0.00574  | 0.19061      | 0.00065 | 10.5 s              |
| 43:28.4   | Data point 36 | 1.50000 mL | 0.10861 mL | 0.10200 mL | 0.05000 mL | 4.017 | -0.01503 | 0.86567      | 0.00080 | 11.0 s              |
| 44:09.9   | Data point 37 | 1.50000 mL | 0.10861 mL | 0.10240 mL | 0.05000 mL | 4.227 | -0.01947 | 0.92718      | 0.00100 | 12.0 s              |
| 44:47.3   | Data point 38 | 1.50000 mL | 0.10861 mL | 0.10266 mL | 0.05000 mL | 4.444 | -0.01821 | 0.92624      | 0.00093 | 13.0 s              |
| 45:25.7   | Data point 39 | 1.50000 mL | 0.10861 mL | 0.10282 mL | 0.05000 mL | 4.652 | -0.01914 | 0.89982      | 0.00100 | 14.0 s              |
| 46:05.1   | Data point 40 | 1.50000 mL | 0.10861 mL | 0.10292 mL | 0.05000 mL | 4.800 | -0.01859 | 0.91342      | 0.00096 | 15.0 s              |
| 46:50.7   | Data point 41 | 1.50000 mL | 0.10861 mL | 0.10303 mL | 0.05000 mL | 5.083 | -0.01985 | 0.98349      | 0.00099 | 23.0 s              |
| 47:44.2   | Data point 42 | 1.50000 mL | 0.10861 mL | 0.10313 mL | 0.05000 mL | 5.579 | -0.01759 | 0.91486      | 0.00091 | 42.0 s              |
| 49:02.1   | Data point 43 | 1.50000 mL | 0.10861 mL | 0.10320 mL | 0.05000 mL | 6.101 | -0.01900 | 0.90215      | 0.00099 | 54.5 s              |
| 50:27.2   | Data point 44 | 1.50000 mL | 0.10861 mL | 0.10327 mL | 0.05000 mL | 6.674 | -0.03446 | 0.99241      | 0.00171 | Timed out at 59.5 s |
| 51:57.7   | Data point 45 | 1.50000 mL | 0.10861 mL | 0.10336 mL | 0.05000 mL | 7.259 | -0.06329 | 0.99069      | 0.00314 | Timed out at 59.5 s |
| 53:33.3   | Data point 46 | 1.50000 mL | 0.10861 mL | 0.10343 mL | 0.05000 mL | 7.768 | -0.05820 | 0.98124      | 0.00290 | Timed out at 59.5 s |
| 55:03.8   | Data point 47 | 1.50000 mL | 0.10861 mL | 0.10348 mL | 0.05000 mL | 8.292 | -0.03946 | 0.97572      | 0.00197 | Timed out at 59.5 s |
| 56:34.3   | Data point 48 | 1.50000 mL | 0.10861 mL | 0.10353 mL | 0.05000 mL | 8.557 | -0.01940 | 0.93969      | 0.00099 | 57.5 s              |
| 58:07.5   | Data point 49 | 1.50000 mL | 0.10861 mL | 0.10360 mL | 0.05000 mL | 8.805 | -0.00522 | 0.06822      | 0.00099 | 30.5 s              |
| 59:13.7   | Data point 50 | 1.50000 mL | 0.10861 mL | 0.10369 mL | 0.05000 mL | 9.024 | -0.01835 | 0.91843      | 0.00094 | 25.0 s              |
| 1:00:42.8 | Data point 51 | 1.50000 mL | 0.16823 mL | 0.10369 mL | 0.30000 mL | 1.978 | -0.00289 | 0.10876      | 0.00043 | 10.0 s              |
| 1:01:29.1 | Data point 52 | 1.50000 mL | 0.16823 mL | 0.12458 mL | 0.30000 mL | 2.182 | -0.01606 | 0.64737      | 0.00099 | 15.5 s              |
| 1:02:10.3 | Data point 53 | 1.50000 mL | 0.16823 mL | 0.13763 mL | 0.30000 mL | 2.373 | 0.00806  | 0.16357      | 0.00099 | 13.0 s              |
| 1:02:49.0 | Data point 54 | 1.50000 mL | 0.16823 mL | 0.14661 mL | 0.30000 mL | 2.587 | -0.00022 | 0.00759      | 0.00012 | 10.0 s              |
| 1:03:24.5 | Data point 55 | 1.50000 mL | 0.16823 mL | 0.15263 mL | 0.30000 mL | 2.790 | -0.00959 | 0.75034      | 0.00055 | 10.0 s              |
| 1:04:00.1 | Data point 56 | 1.50000 mL | 0.16823 mL | 0.15675 mL | 0.30000 mL | 3.013 | 0.01134  | 0.31455      | 0.00100 | 11.5 s              |
| 1:04:37.1 | Data point 57 | 1.50000 mL | 0.16823 mL | 0.15941 mL | 0.30000 mL | 3.278 | -0.01412 | 0.56497      | 0.00093 | 10.0 s              |
| 1:05:27.9 | Data point 58 | 1.50000 mL | 0.16823 mL | 0.16087 mL | 0.30000 mL | 3.486 | 0.00232  | 0.15736      | 0.00029 | 10.5 s              |
| 1:06:03.8 | Data point 59 | 1.50000 mL | 0.16823 mL | 0.16185 mL | 0.30000 mL | 3.728 | -0.00733 | 0.87321      | 0.00039 | 10.0 s              |
| 1:06:44.4 | Data point 60 | 1.50000 mL | 0.16823 mL | 0.16254 mL | 0.30000 mL | 3.996 | -0.01008 | 0.94298      | 0.00051 | 10.5 s              |
| 1:07:25.5 | Data point 61 | 1.50000 mL | 0.16823 mL | 0.16289 mL | 0.30000 mL | 4.206 | -0.01231 | 0.75314      | 0.00070 | 10.0 s              |
| 1:08:00.9 | Data point 62 | 1.50000 mL | 0.16823 mL | 0.16308 mL | 0.30000 mL | 4.435 | 0.00196  | 0.01015      | 0.00096 | 13.5 s              |
| 1:08:39.8 | Data point 63 | 1.50000 mL | 0.16823 mL | 0.16319 mL | 0.30000 mL | 4.623 | -0.01066 | 0.39352      | 0.00084 | 12.0 s              |
| 1:09:22.3 | Data point 64 | 1.50000 mL | 0.16823 mL | 0.16331 mL | 0.30000 mL | 4.896 | -0.01695 | 0.88825      | 0.00089 | 13.5 s              |
| 1:10:06.3 | Data point 65 | 1.50000 mL | 0.16823 mL | 0.16345 mL | 0.30000 mL | 5.367 | -0.01896 | 0.91841      | 0.00098 | 47.5 s              |
| 1:11:24.4 | Data point 66 | 1.50000 mL | 0.16823 mL | 0.16352 mL | 0.30000 mL | 5.813 | 0.00169  | 0.01098      | 0.00080 | 43.0 s              |
| 1:12:38.1 | Data point 67 | 1.50000 mL | 0.16823 mL | 0.16357 mL | 0.30000 mL | 6.350 | -0.02811 | 0.94564      | 0.00143 | Timed out at 59.5 s |
| 1:14:03.5 | Data point 68 | 1.50000 mL | 0.16823 mL | 0.16362 mL | 0.30000 mL | 6.671 | -0.04606 | 0.97751      | 0.00230 | Timed out at 59.5 s |
| 1:15:39.1 | Data point 69 | 1.50000 mL | 0.16823 mL | 0.16369 mL | 0.30000 mL | 7.163 | -0.06931 | 0.98791      | 0.00344 | Timed out at 59.5 s |
| 1:17:09.6 | Data point 70 | 1.50000 mL | 0.16823 mL | 0.16376 mL | 0.30000 mL | 7.616 | -0.08650 | 0.98058      | 0.00432 | Timed out at 59.5 s |
| 1:18:40.1 | Data point 71 | 1.50000 mL | 0.16823 mL | 0.16381 mL | 0.30000 mL | 8.042 | -0.06118 | 0.94917      | 0.00310 | Timed out at 59.5 s |
| 1:20:15.7 | Data point 72 | 1.50000 mL | 0.16823 mL | 0.16388 mL | 0.30000 mL | 8.385 | -0.04572 | 0.94304      | 0.00233 | Timed out at 59.5 s |
| 1:21:51.3 | Data point 73 | 1.50000 mL | 0.16823 mL | 0.16395 mL | 0.30000 mL | 8.716 | -0.01968 | 0.98797      | 0.00098 | 33.5 s              |
| 1:23:05.7 | Data point 74 | 1.50000 mL | 0.16823 mL | 0.16406 mL | 0.30000 mL | 8.959 | -0.01414 | 0.95962      | 0.00071 | 24.5 s              |
| 1:23:55.6 | Data point 75 | 1.50000 mL | 0.16823 mL | 0.16409 mL | 0.30000 mL | 9.002 | -0.01249 | 0.43204      | 0.00094 | 13.5 s              |
| 1:24:18.2 | Assay volumes | 1.50000 mL | 0.16823 mL | 0.16409 mL | 0.30000 mL |       |          |              |         |                     |

Sample name: **M02\_octanol**  
 Assay name: **pH-metric high logP**  
 Assay ID: **18C-03012**  
 Filename: **C:\Sirius\_T3\Mehtap\20180302\_exp29\_logP\_T3-2\18C-03012\_M02\_octanol\_pH-metric high logP.t3r**

Experiment start time: **3/3/2018 3:08:32 PM**  
 Analyst: **Dorothy Levorse**  
 Instrument ID: **T312060**

## Assay Settings

| Setting                             | Value              | Original Value | Date/Time changed | Imported from |
|-------------------------------------|--------------------|----------------|-------------------|---------------|
| <b>General Settings</b>             |                    |                |                   |               |
| Analyst name                        | Dorothy Levorse    |                |                   |               |
| <b>Standard Experiment Settings</b> |                    |                |                   |               |
| Number of titrations                | 3                  |                |                   |               |
| Minimum pH                          | 2.000              |                |                   |               |
| Maximum pH                          | 9.000              |                |                   |               |
| pH step between points of           | 0.200              |                |                   |               |
| Minimum titrant addition            | 0.00002 mL         |                |                   |               |
| Maximum titrant addition            | 0.10000 mL         |                |                   |               |
| Argon flow rate                     | 100%               |                |                   |               |
| Start titration using               | Cautious pH adjust |                |                   |               |
| <b>Advanced General Settings</b>    |                    |                |                   |               |
| Detect turbidity using              | None               |                |                   |               |
| Collect turbidity sensor data       | No                 |                |                   |               |
| Collect UV spectra                  | No                 |                |                   |               |
| Stir after titrant addition for     | 5 seconds          |                |                   |               |
| For titrant addition, stir at       | 10%                |                |                   |               |
| <b>Titration Pre-Dose</b>           |                    |                |                   |               |
| Titration pre-dose                  | None               |                |                   |               |
| <b>Assay Medium</b>                 |                    |                |                   |               |
| ISA water volume                    | 1.50 mL            |                |                   |               |
| Water added                         | Automatic          |                |                   |               |
| Partition solvent type              | Octanol            |                |                   |               |
| Partition volume                    | 0.020 mL           |                |                   |               |
| Partition solvent added             | Automatic          |                |                   |               |
| After partition addition, stir for  | 1 seconds          |                |                   |               |
| <b>Sample Sonication</b>            |                    |                |                   |               |
| Sonicate                            | Yes                |                |                   |               |
| Adjust pH for sonication            | No                 |                |                   |               |
| Sonicate for                        | 120 seconds        |                |                   |               |
| After sonication stir for           | 5 seconds          |                |                   |               |
| <b>Sample Dissolution</b>           |                    |                |                   |               |
| Perform a dissolution stage         | Yes                |                |                   |               |
| Adjust and hold pH for dissolution  | To start pH        |                |                   |               |
| Stir to dissolve for                | 120 seconds        |                |                   |               |
| For dissolution, stir at            | 10%                |                |                   |               |
| <b>Carbonate purge</b>              |                    |                |                   |               |
| Perform a carbonate purge           | No                 |                |                   |               |
| <b>Temperature Control</b>          |                    |                |                   |               |
| Wait for temperature                | Yes                |                |                   |               |
| Required start temperature          | 25.0°C             |                |                   |               |
| Acceptable deviation                | 0.5°C              |                |                   |               |
| Time to wait                        | 60 seconds         |                |                   |               |
| Stir speed of                       | 50%                |                |                   |               |
| <b>Titration 1</b>                  |                    |                |                   |               |
| Titrate from                        | Low to high pH     |                |                   |               |
| Adjust to start pH                  | Yes                |                |                   |               |
| After pH adjust stir for            | 30 seconds         |                |                   |               |
| Stir to allow partitioning for      | 15 seconds         |                |                   |               |
| Stirrer speed for partitioning      | 50%                |                |                   |               |
| <b>Titration 2</b>                  |                    |                |                   |               |
| Titrate from                        | Low to high pH     |                |                   |               |
| Add additional water                | 0.00 mL            |                |                   |               |
| Additional partition solvent volume | 0.030 mL           |                |                   |               |
| Additional partition solvent added  | Automatic          |                |                   |               |
| After pH adjust stir for            | 30 seconds         |                |                   |               |
| Stir to allow partitioning for      | 15 seconds         |                |                   |               |
| Stirrer speed for partitioning      | 55%                |                |                   |               |



Sample name: **M02\_octanol**  
 Assay name: **pH-metric high logP**  
 Assay ID: **18C-03012**  
 Filename: **C:\Sirius\_T3\Mehtap\20180302\_exp29\_logP\_T3-2\18C-03012\_M02\_octanol\_pH-metric high logP.t3r**

Experiment start time: **3/3/2018 3:08:32 PM**  
 Analyst: **Dorothy Levorse**  
 Instrument ID: **T312060**

## Assay Settings (continued)

| Setting                             | Value          | Original Value | Date/Time changed | Imported from |
|-------------------------------------|----------------|----------------|-------------------|---------------|
| <b>Titration 3</b>                  |                |                |                   |               |
| Titrate from                        | Low to high pH |                |                   |               |
| Add additional water                | 0.00 mL        |                |                   |               |
| Additional partition solvent volume | 0.250 mL       |                |                   |               |
| Additional partition solvent added  | Automatic      |                |                   |               |
| After pH adjust stir for            | 30 seconds     |                |                   |               |
| Stir to allow partitioning for      | 15 seconds     |                |                   |               |
| Stirrer speed for partitioning      | 60%            |                |                   |               |
| <b>Data Point Stability</b>         |                |                |                   |               |
| Stir during data point collection   | No             |                |                   |               |
| Delay before data point collection  | 0 seconds      |                |                   |               |
| Number of points to average         | 20 points      |                |                   |               |
| Time interval between points        | 0.50 seconds   |                |                   |               |
| Required maximum standard deviation | 0.00100 dpH/dt |                |                   |               |
| Stability timeout after             | 60 seconds     |                |                   |               |

## Calibration Settings

| Setting                   | Value  | Date/Time changed   | Imported from             |
|---------------------------|--------|---------------------|---------------------------|
| Four-Plus alpha           | 0.111  | 3/3/2018 3:08:32 PM | C:\Sirius_T3\HCl18C02.t3r |
| Four-Plus S               | 0.9988 | 3/3/2018 3:08:32 PM | C:\Sirius_T3\HCl18C02.t3r |
| Four-Plus jH              | 1.0    | 3/3/2018 3:08:32 PM | C:\Sirius_T3\HCl18C02.t3r |
| Four-Plus jOH             | -0.8   | 3/3/2018 3:08:32 PM | C:\Sirius_T3\HCl18C02.t3r |
| Base concentration factor | 1.000  | 3/3/2018 3:08:32 PM | C:\Sirius_T3\KOH18B27.t3r |
| Acid concentration factor | 0.999  | 3/3/2018 3:08:32 PM | C:\Sirius_T3\HCl18C02.t3r |

## Instrument Settings

| Setting              | Value                      | Batch Id    | Install date           |
|----------------------|----------------------------|-------------|------------------------|
| Instrument owner     | Merck                      |             |                        |
| Instrument ID        | T312060                    |             |                        |
| Instrument type      | T3 Simulator               |             |                        |
| Software version     | 1.1.3.0                    |             |                        |
| Dispenser module     |                            | T3DM1200361 | 3/31/2009 5:24:52 AM   |
| Dispenser 0          | Water                      |             | 3/31/2009 5:25:05 AM   |
| Syringe volume       | 2.5 mL                     |             |                        |
| Firmware version     | 1.2.1(r2)                  |             |                        |
| Titrant              | Water (0.15 M KCl)         | 02-06-2018  | 2/27/2018 10:05:59 AM  |
| Dispenser 2          | Acid                       |             | 3/31/2009 5:25:11 AM   |
| Syringe volume       | 0.5 mL                     |             |                        |
| Firmware version     | 1.2.1(r2)                  |             |                        |
| Titrant              | Acid (0.5 M HCl)           | 02-27-2018  | 2/27/2018 10:27:22 AM  |
| Dispenser 1          | Base                       |             | 3/31/2009 5:25:21 AM   |
| Syringe volume       | 0.5 mL                     |             |                        |
| Firmware version     | 1.2.1(r2)                  |             |                        |
| Titrant              | Base (0.5 M KOH)           | 9/22/2017   | 2/27/2018 10:21:22 AM  |
| Dispenser 5          | Cosolvent                  |             | 3/31/2009 5:26:24 AM   |
| Syringe volume       | 2.5 mL                     |             |                        |
| Firmware version     | 1.2.1(r2)                  |             |                        |
| Distribution valve 5 | Distribution Valve         |             | 3/31/2009 5:28:19 AM   |
| Firmware version     | 1.1.3                      |             |                        |
| Port A               | Methanol (80%, 0.15 M KCl) | 09-26-17    | 2/7/2018 9:42:01 AM    |
| Port B               | Cyclohexane                | 11-01-17    | 2/27/2018 10:37:57 AM  |
| Dispenser 3          | Buffer                     |             | 8/3/2010 5:05:16 AM    |
| Syringe volume       | 0.5 mL                     |             |                        |
| Firmware version     | 1.2.1(r2)                  |             |                        |
| Titrant              | Dodecane                   | 2018/01/31  | 2/28/2018 10:18:04 AM  |
| Dispenser 6          | Octanol                    |             | 10/22/2010 10:52:43 AM |



Sample name: **M02\_octanol**  
 Assay name: **pH-metric high logP**  
 Assay ID: **18C-03012**  
 Filename: **C:\Sirius\_T3\Mehtap\20180302\_exp29\_logP\_T3-2\18C-03012\_M02\_octanol\_pH-metric high logP.t3r**

Experiment start time: **3/3/2018 3:08:32 PM**  
 Analyst: **Dorothy Levorse**  
 Instrument ID: **T312060**

## Instrument Settings (continued)

| Setting                                   | Value                      | Batch Id    | Install date           |
|-------------------------------------------|----------------------------|-------------|------------------------|
| Syringe volume                            | 0.5 mL                     |             |                        |
| Firmware version                          | 1.2.1(r2)                  |             |                        |
| Titrant                                   | Octanol                    | 01-31-2018  | 2/27/2018 9:59:35 AM   |
| Titrator                                  |                            | T3TM1200161 | 3/31/2009 5:24:17 AM   |
| Horizontal axis firmware version          | 1.17 AI1DI2DO2 Stepper 2   |             |                        |
| Vertical axis firmware version            | 1.17 AI1DI2DO2 Stepper 2   |             |                        |
| Chassis I/O firmware version              | 1.11 AI1DI0DO4 Norgren I/O |             |                        |
| Probe I/O firmware version                | 1.1.1                      |             |                        |
| Electrode                                 | T3 Electrode               | T3E0923     | 1/23/2018 2:01:00 PM   |
| E0 calibration                            | +6.14 mV                   |             | 3/3/2018 3:09:00 PM    |
| Filling solution                          | 3M KCl                     | KCL097      | 3/2/2018 9:43:24 AM    |
| Liquids                                   |                            |             |                        |
| Wash 1                                    | 50% IPA:50% Water          |             | 3/2/2018 9:45:12 AM    |
| Wash 2                                    | 0.5% Triton X-100 in H2O   |             | 3/2/2018 9:45:15 AM    |
| Buffer position 1                         | pH7 Wash                   |             | 3/2/2018 9:45:18 AM    |
| Buffer position 2                         | pH 7                       |             | 3/2/2018 9:45:21 AM    |
| Storage position                          |                            |             | 3/2/2018 9:44:44 AM    |
| Wash water                                | 6.7e+003 mL                | 02-27-2018  | 2/27/2018 9:54:39 AM   |
| Waste                                     | 8.8e+003 mL                |             | 11/28/2017 10:36:29 AM |
| Temperature controller                    |                            |             | 8/5/2010 6:35:13 AM    |
| Turbidity detector                        |                            |             | 3/31/2009 5:24:45 AM   |
| Spectrometer                              |                            | 074811      | 11/23/2010 11:22:28 AM |
| Dip probe                                 |                            | 10196       |                        |
| Wavelength coefficient A0                 | 183.333                    |             |                        |
| Wavelength coefficient A1                 | 2.21568                    |             |                        |
| Wavelength coefficient A2                 | -0.000289308               |             |                        |
| Total lamp lit time                       | 120:41:49                  |             | 11/23/2010 11:22:28 AM |
| Calibrated on                             | 2/27/2018 10:40:38 AM      |             |                        |
| Integration time                          | 40                         |             |                        |
| Scans averaged                            | 10                         |             |                        |
| Autoloader                                |                            | T3AL1200345 | 11/10/2015 9:34:13 AM  |
| Left-right axis firmware version          | 1.17 AI1DI2DO2 Stepper 2   |             |                        |
| Front-back axis firmware version          | 1.17 AI1DI2DO2 Stepper 2   |             |                        |
| Vertical axis firmware version            | 1.17 AI1DI2DO2 Stepper 2   |             |                        |
| Chassis I/O firmware version              | 1.11 AI1DI0DO4 Norgren I/O |             |                        |
| Configuration                             |                            |             |                        |
| Alternate titration position              | Titration position         |             |                        |
| Alternate reference position              | Reference position         |             |                        |
| Maximum standard vial volume              | 3.50 mL                    |             |                        |
| Maximum alternate vial volume             | 25.00 mL                   |             |                        |
| Automatic action idle period              | 5 minute(s)                |             |                        |
| Titrant tube volume                       | 1.3 mL                     |             |                        |
| Syringe flush count                       | 3.50                       |             |                        |
| Flowing wash pump volume                  | 20.0 mL                    |             |                        |
| Flowing wash stir duration                | 5 s                        |             |                        |
| Flowing wash stir speed                   | 30%                        |             |                        |
| Solvent wash stir duration                | 5 s                        |             |                        |
| Solvent wash stir speed                   | 30%                        |             |                        |
| Surfactant wash stir duration             | 5 s                        |             |                        |
| Surfactant wash stir speed                | 30%                        |             |                        |
| E0 calibration minimum number of points   | 10                         |             |                        |
| E0 calibration maximum standard deviation | 0.01500                    |             |                        |
| E0 calibration timeout period             | 60 s                       |             |                        |
| E0 calibration stir duration              | 5 s                        |             |                        |
| E0 calibration preparation stir speed     | 30%                        |             |                        |
| E0 calibration buffer wash stir duration  | 5 s                        |             |                        |
| E0 calibration buffer wash stir speed     | 30%                        |             |                        |
| E0 calibration reading stir speed         | 0%                         |             |                        |

Sample name: **M02\_octanol** Experiment start time: **3/3/2018 3:08:32 PM**  
 Assay name: **pH-metric high logP** Analyst: **Dorothy Levorse**  
 Assay ID: **18C-03012** Instrument ID: **T312060**  
 Filename: **C:\Sirius\_T3\Mehtap\20180302\_exp29\_logP\_T3-2\18C-03012\_M02\_octanol\_pH-metric high logP.t3r**

## Instrument Settings (continued)

| Setting                                     | Value   | Batch Id | Install date |
|---------------------------------------------|---------|----------|--------------|
| Spectrometer calibration stir duration      | 5 s     |          |              |
| Spectrometer calibration stir speed         | 30%     |          |              |
| Spectrometer calibration wash pump volume   | 20.0 mL |          |              |
| Spectrometer calibration wash stir duration | 5 s     |          |              |
| Spectrometer calibration wash stir speed    | 30%     |          |              |
| Overhead dispense height                    | 10000   |          |              |

## Refinement Settings

| Setting                        | Value    | Default value |
|--------------------------------|----------|---------------|
| Turbidity detection method     | None     | None          |
| Turbidity wavelength to assess | 500.0 nm | 500.0 nm      |
| Turbidity maximum absorbance   | 0.100    | 0.100         |
| Turbidity probe threshold      | 50.00    | 50.00         |

## Experiment Log

[2:37] Air gap created for Water (0.15 M KCl)  
 [2:38] Air gap created for Acid (0.5 M HCl)  
 [2:38] Air gap created for Base (0.5 M KOH)  
 [2:39] Air gap released for Water (0.15 M KCl)  
 [2:42] Titrator arm moved over Titration position  
 [2:42] Titration 1 of 3  
 [2:42] Adding initial titrants  
 [2:42] Automatically add 1.50000 mL of water  
 [3:08] Dispensed 1.500000 mL of Water (0.15 M KCl)  
 [3:12] Titrator arm moved over Drain  
 [5:53] Titrator arm moved to Titration position  
 [5:53] Argon flow rate set to 100  
 [5:53] Stirrer speed set to 10  
 [5:58] Automatically add 0.02000 mL of Octanol  
 [5:59] Dispensed 0.019991 mL of Octanol  
 [6:00] Initial pH = 9.32  
 [6:00] Iterative adjust 9.32 -> 2.00  
 [6:00] pH 9.32 -> 2.00  
 [6:02] Air gap released for Acid (0.5 M HCl)  
 [6:02] Dispensed 0.053363 mL of Acid (0.5 M HCl)  
 [6:08] Holding pH 2.00  
 [8:08] Stirrer speed set to 0  
 [8:08] Stirrer speed set to 50  
 [8:08] Iterative adjust 1.99 -> 2.00  
 [8:08] pH 1.99 -> 2.00  
 [8:08] Air gap released for Base (0.5 M KOH)  
 [8:09] Dispensed 0.001129 mL of Base (0.5 M KOH)  
 [8:59] Stirrer speed set to 0  
 [9:09] Datapoint id 1 collected  
 [9:09] Stirrer speed set to 50  
 [9:15] pH 2.08 -> 2.28  
 [9:15] Using cautious pH adjust  
 [9:15] Dispensed 0.006726 mL of Base (0.5 M KOH)  
 [9:20] Stepping pH = 2.16  
 [9:20] Dispensed 0.005738 mL of Base (0.5 M KOH)  
 [9:25] Stepping pH = 2.25  
 [9:25] Dispensed 0.001834 mL of Base (0.5 M KOH)  
 [9:31] Stepping pH = 2.28  
 [9:46] Stirrer speed set to 0  
 [9:56] Datapoint id 2 collected  
 [9:56] Charge balance equation is out by -6.2%  
 [9:56] Stirrer speed set to 50

Sample name: **M02\_octanol**  
Assay name: **pH-metric high logP**  
Assay ID: **18C-03012**  
Filename: **C:\Sirius\_T3\Mehtap\20180302\_exp29\_logP\_T3-2\18C-03012\_M02\_octanol\_pH-metric high logP.t3r**

Experiment start time: **3/3/2018 3:08:32 PM**  
Analyst: **Dorothy Levorse**  
Instrument ID: **T312060**

## Experiment Log (continued)

[10:01] pH 2.29 -> 2.49  
[10:01] Using charge balance adjust  
[10:01] Dispensed 0.008866 mL of Base (0.5 M KOH)  
[10:21] Stirrer speed set to 0  
[10:32] Datapoint id 3 collected  
[10:32] Charge balance equation is out by -5.7%  
[10:32] Stirrer speed set to 50  
[10:37] pH 2.48 -> 2.68  
[10:37] Using charge balance adjust  
[10:37] Dispensed 0.006279 mL of Base (0.5 M KOH)  
[10:57] Stirrer speed set to 0  
[11:07] Datapoint id 4 collected  
[11:07] Charge balance equation is out by -6.6%  
[11:07] Stirrer speed set to 50  
[11:13] pH 2.68 -> 2.88  
[11:13] Using charge balance adjust  
[11:13] Dispensed 0.004704 mL of Base (0.5 M KOH)  
[11:33] Stirrer speed set to 0  
[11:43] Datapoint id 5 collected  
[11:43] Charge balance equation is out by -0.6%  
[11:43] Stirrer speed set to 50  
[11:48] pH 2.88 -> 3.08  
[11:48] Using charge balance adjust  
[11:48] Dispensed 0.003622 mL of Base (0.5 M KOH)  
[12:08] Stirrer speed set to 0  
[12:18] Datapoint id 6 collected  
[12:18] Charge balance equation is out by 0.1%  
[12:18] Stirrer speed set to 50  
[12:24] pH 3.09 -> 3.29  
[12:24] Using charge balance adjust  
[12:24] Dispensed 0.002846 mL of Base (0.5 M KOH)  
[12:44] Stirrer speed set to 0  
[12:54] Datapoint id 7 collected  
[12:54] Charge balance equation is out by -4.2%  
[12:54] Stirrer speed set to 50  
[12:59] pH 3.28 -> 3.48  
[12:59] Using charge balance adjust  
[13:01] Dispensed 0.002211 mL of Base (0.5 M KOH)  
[13:20] Stirrer speed set to 0  
[13:31] Datapoint id 8 collected  
[13:31] Charge balance equation is out by 21.6%  
[13:31] Stirrer speed set to 50  
[13:36] pH 3.53 -> 3.73  
[13:36] Using cautious pH adjust  
[13:36] Dispensed 0.000776 mL of Base (0.5 M KOH)  
[13:41] Stepping pH = 3.67  
[13:41] Dispensed 0.000282 mL of Base (0.5 M KOH)  
[13:46] Stepping pH = 3.70  
[13:46] Dispensed 0.000188 mL of Base (0.5 M KOH)  
[13:51] Stepping pH = 3.72  
[14:07] Stirrer speed set to 0  
[14:18] Datapoint id 9 collected  
[14:18] Charge balance equation is out by 19.9%  
[14:18] Stirrer speed set to 50  
[14:23] pH 3.69 -> 3.89  
[14:23] Using cautious pH adjust  
[14:23] Dispensed 0.000588 mL of Base (0.5 M KOH)  
[14:28] Stepping pH = 3.82  
[14:29] Dispensed 0.000235 mL of Base (0.5 M KOH)

Sample name: **M02\_octanol**  
Assay name: **pH-metric high logP**  
Assay ID: **18C-03012**  
Filename: **C:\Sirius\_T3\Mehtap\20180302\_exp29\_logP\_T3-2\18C-03012\_M02\_octanol\_pH-metric high logP.t3r**

Experiment start time: **3/3/2018 3:08:32 PM**  
Analyst: **Dorothy Levorse**  
Instrument ID: **T312060**

## Experiment Log (continued)

[14:34] Stepping pH = 3.86  
[14:34] Dispensed 0.000141 mL of Base (0.5 M KOH)  
[14:39] Stepping pH = 3.88  
[14:54] Stirrer speed set to 0  
[15:08] Datapoint id 10 collected  
[15:08] Charge balance equation is out by 17.0%  
[15:08] Stirrer speed set to 50  
[15:14] pH 3.87 -> 4.07  
[15:14] Using cautious pH adjust  
[15:14] Dispensed 0.000423 mL of Base (0.5 M KOH)  
[15:19] Stepping pH = 4.00  
[15:19] Dispensed 0.000165 mL of Base (0.5 M KOH)  
[15:24] Stepping pH = 4.02  
[15:24] Dispensed 0.000212 mL of Base (0.5 M KOH)  
[15:29] Stepping pH = 4.09  
[15:44] Stirrer speed set to 0  
[16:00] Datapoint id 11 collected  
[16:00] Charge balance equation is out by 4.0%  
[16:00] Stirrer speed set to 50  
[16:05] pH 4.05 -> 4.25  
[16:05] Using charge balance adjust  
[16:05] Dispensed 0.000588 mL of Base (0.5 M KOH)  
[16:25] Stirrer speed set to 0  
[16:53] Datapoint id 12 collected  
[16:53] Charge balance equation is out by -3.7%  
[16:53] Stirrer speed set to 50  
[16:58] pH 4.27 -> 4.47  
[16:58] Using charge balance adjust  
[16:58] Dispensed 0.000376 mL of Base (0.5 M KOH)  
[17:19] Stirrer speed set to 0  
[17:55] Datapoint id 13 collected  
[17:55] Charge balance equation is out by -71.4%  
[17:55] Stirrer speed set to 50  
[18:00] pH 4.37 -> 4.57  
[18:00] Using cautious pH adjust  
[18:00] Dispensed 0.000141 mL of Base (0.5 M KOH)  
[18:05] Stepping pH = 4.42  
[18:05] Dispensed 0.000212 mL of Base (0.5 M KOH)  
[18:11] Stepping pH = 4.67  
[18:26] Stirrer speed set to 0  
[19:21] Datapoint id 14 collected  
[19:21] Charge balance equation is out by -17.2%  
[19:21] Stirrer speed set to 50  
[19:26] pH 4.58 -> 4.78  
[19:26] Using cautious pH adjust  
[19:26] Dispensed 0.000094 mL of Base (0.5 M KOH)  
[19:31] Stepping pH = 4.63  
[19:31] Dispensed 0.000141 mL of Base (0.5 M KOH)  
[19:36] Stepping pH = 4.85  
[19:51] Stirrer speed set to 0  
[20:51] Datapoint id 15 collected  
[20:51] Charge balance equation is out by -20.7%  
[20:51] Stirrer speed set to 50  
[20:56] pH 4.78 -> 4.98  
[20:56] Using cautious pH adjust  
[20:56] Dispensed 0.000071 mL of Base (0.5 M KOH)  
[21:01] Stepping pH = 4.82  
[21:01] Dispensed 0.000118 mL of Base (0.5 M KOH)  
[21:07] Stepping pH = 5.08

Sample name: **M02\_octanol**  
Assay name: **pH-metric high logP**  
Assay ID: **18C-03012**  
Filename: **C:\Sirius\_T3\Mehtap\20180302\_exp29\_logP\_T3-2\18C-03012\_M02\_octanol\_pH-metric high logP.t3r**

Experiment start time: **3/3/2018 3:08:32 PM**  
Analyst: **Dorothy Levorse**  
Instrument ID: **T312060**

## Experiment Log (continued)

[21:22] Stirrer speed set to 0  
[22:22] Datapoint id 16 collected  
[22:22] Charge balance equation is out by -35.6%  
[22:22] Stirrer speed set to 50  
[22:27] pH 5.00 -> 5.20  
[22:27] Using cautious pH adjust  
[22:27] Dispensed 0.000047 mL of Base (0.5 M KOH)  
[22:32] Stepping pH = 5.11  
[22:32] Dispensed 0.000024 mL of Base (0.5 M KOH)  
[22:37] Stepping pH = 5.09  
[22:37] Dispensed 0.000141 mL of Base (0.5 M KOH)  
[22:42] Stepping pH = 5.51  
[22:57] Stirrer speed set to 0  
[23:53] Datapoint id 17 collected  
[23:53] Charge balance equation is out by -140.4%  
[23:53] Stirrer speed set to 50  
[23:59] pH 5.46 -> 5.66  
[23:59] Using cautious pH adjust  
[23:59] Dispensed 0.000024 mL of Base (0.5 M KOH)  
[24:04] Stepping pH = 5.45  
[24:04] Dispensed 0.000118 mL of Base (0.5 M KOH)  
[24:09] Stepping pH = 5.76  
[24:24] Stirrer speed set to 0  
[25:11] Datapoint id 18 collected  
[25:11] Charge balance equation is out by -211.0%  
[25:11] Stirrer speed set to 50  
[25:16] pH 5.83 -> 6.03  
[25:16] Using cautious pH adjust  
[25:16] Dispensed 0.000024 mL of Base (0.5 M KOH)  
[25:21] Stepping pH = 5.82  
[25:21] Dispensed 0.000118 mL of Base (0.5 M KOH)  
[25:26] Stepping pH = 6.32  
[25:41] Stirrer speed set to 0  
[26:41] Datapoint id 19 collected  
[26:41] Charge balance equation is out by -217.8%  
[26:41] Stirrer speed set to 50  
[26:46] pH 6.25 -> 6.45  
[26:46] Using cautious pH adjust  
[26:46] Dispensed 0.000024 mL of Base (0.5 M KOH)  
[26:51] Stepping pH = 6.23  
[26:51] Dispensed 0.000118 mL of Base (0.5 M KOH)  
[26:57] Stepping pH = 7.03  
[27:12] Stirrer speed set to 0  
[28:12] Datapoint id 20 collected  
[28:12] Charge balance equation is out by -227.6%  
[28:12] Stirrer speed set to 50  
[28:17] pH 7.10 -> 7.30  
[28:17] Using cautious pH adjust  
[28:17] Dispensed 0.000024 mL of Base (0.5 M KOH)  
[28:22] Stepping pH = 7.16  
[28:22] Dispensed 0.000024 mL of Base (0.5 M KOH)  
[28:27] Stepping pH = 7.53  
[28:42] Stirrer speed set to 0  
[29:42] Datapoint id 21 collected  
[29:42] Charge balance equation is out by -180.3%  
[29:42] Stirrer speed set to 50  
[29:47] pH 7.45 -> 7.65  
[29:47] Using cautious pH adjust  
[29:47] Dispensed 0.000024 mL of Base (0.5 M KOH)

Sample name: **M02\_octanol**  
Assay name: **pH-metric high logP**  
Assay ID: **18C-03012**  
Filename: **C:\Sirius\_T3\Mehtap\20180302\_exp29\_logP\_T3-2\18C-03012\_M02\_octanol\_pH-metric high logP.t3r**

Experiment start time: **3/3/2018 3:08:32 PM**  
Analyst: **Dorothy Levorse**  
Instrument ID: **T312060**

## Experiment Log (continued)

[29:52] Stepping pH = 7.65  
[30:07] Stirrer speed set to 0  
[31:08] Datapoint id 22 collected  
[31:08] Charge balance equation is out by -150.3%  
[31:08] Stirrer speed set to 50  
[31:13] pH 7.60 -> 7.80  
[31:13] Using cautious pH adjust  
[31:13] Dispensed 0.000024 mL of Base (0.5 M KOH)  
[31:18] Stepping pH = 7.75  
[31:18] Dispensed 0.000024 mL of Base (0.5 M KOH)  
[31:23] Stepping pH = 8.16  
[31:38] Stirrer speed set to 0  
[32:38] Datapoint id 23 collected  
[32:38] Charge balance equation is out by -495.8%  
[32:38] Stirrer speed set to 50  
[32:43] pH 8.06 -> 8.26  
[32:43] Using cautious pH adjust  
[32:43] Dispensed 0.000024 mL of Base (0.5 M KOH)  
[32:48] Stepping pH = 8.02  
[32:48] Dispensed 0.000024 mL of Base (0.5 M KOH)  
[32:53] Stepping pH = 8.38  
[33:08] Stirrer speed set to 0  
[34:09] Datapoint id 24 collected  
[34:09] Charge balance equation is out by -485.1%  
[34:09] Stirrer speed set to 50  
[34:14] pH 8.42 -> 8.62  
[34:14] Using cautious pH adjust  
[34:14] Dispensed 0.000024 mL of Base (0.5 M KOH)  
[34:19] Stepping pH = 8.39  
[34:19] Dispensed 0.000024 mL of Base (0.5 M KOH)  
[34:24] Stepping pH = 8.57  
[34:24] Dispensed 0.000024 mL of Base (0.5 M KOH)  
[34:29] Stepping pH = 8.82  
[34:44] Stirrer speed set to 0  
[35:42] Datapoint id 25 collected  
[35:42] Charge balance equation is out by -501.8%  
[35:42] Stirrer speed set to 50  
[35:47] pH 8.72 -> 8.92  
[35:47] Using cautious pH adjust  
[35:47] Dispensed 0.000024 mL of Base (0.5 M KOH)  
[35:52] Stepping pH = 8.69  
[35:52] Dispensed 0.000071 mL of Base (0.5 M KOH)  
[35:57] Stepping pH = 9.04  
[36:12] Stirrer speed set to 0  
[36:48] Datapoint id 26 collected  
[36:48] Charge balance equation is out by -260.2%  
[36:48] Titration 2 of 3  
[36:48] Adding initial titrants  
[36:48] Automatically add 0.03000 mL of Octanol  
[36:49] Dispensed 0.030009 mL of Octanol  
[36:49] Stirrer speed set to 10  
[36:50] Stirrer speed set to 55  
[36:50] Iterative adjust 9.10 -> 2.00  
[36:50] pH 9.10 -> 2.00  
[36:51] Dispensed 0.055245 mL of Acid (0.5 M HCl)  
[37:41] Stirrer speed set to 0  
[37:52] Datapoint id 27 collected  
[37:52] Stirrer speed set to 55  
[37:57] pH 1.99 -> 2.19



Sample name: **M02\_octanol**  
Assay name: **pH-metric high logP**  
Assay ID: **18C-03012**  
Filename: **C:\Sirius\_T3\Mehtap\20180302\_exp29\_logP\_T3-2\18C-03012\_M02\_octanol\_pH-metric high logP.t3r**

Experiment start time: **3/3/2018 3:08:32 PM**  
Analyst: **Dorothy Levorse**  
Instrument ID: **T312060**

## Experiment Log (continued)

[37:57] Using cautious pH adjust  
[37:57] Dispensed 0.008913 mL of Base (0.5 M KOH)  
[38:02] Stepping pH = 2.08  
[38:02] Dispensed 0.006279 mL of Base (0.5 M KOH)  
[38:07] Stepping pH = 2.17  
[38:08] Dispensed 0.001176 mL of Base (0.5 M KOH)  
[38:13] Stepping pH = 2.19  
[38:28] Stirrer speed set to 0  
[38:38] Datapoint id 28 collected  
[38:38] Charge balance equation is out by 8.2%  
[38:38] Stirrer speed set to 55  
[38:43] pH 2.21 -> 2.41  
[38:43] Using charge balance adjust  
[38:43] Dispensed 0.011406 mL of Base (0.5 M KOH)  
[39:04] Stirrer speed set to 0  
[39:14] Datapoint id 29 collected  
[39:14] Charge balance equation is out by -5.6%  
[39:14] Stirrer speed set to 55  
[39:19] pH 2.40 -> 2.60  
[39:19] Using charge balance adjust  
[39:19] Dispensed 0.007949 mL of Base (0.5 M KOH)  
[39:39] Stirrer speed set to 0  
[39:50] Datapoint id 30 collected  
[39:50] Charge balance equation is out by 8.8%  
[39:50] Stirrer speed set to 55  
[39:55] pH 2.63 -> 2.83  
[39:55] Using charge balance adjust  
[39:55] Dispensed 0.005480 mL of Base (0.5 M KOH)  
[40:15] Stirrer speed set to 0  
[40:25] Datapoint id 31 collected  
[40:25] Charge balance equation is out by -9.5%  
[40:25] Stirrer speed set to 55  
[40:30] pH 2.82 -> 3.02  
[40:30] Using charge balance adjust  
[40:31] Dispensed 0.004092 mL of Base (0.5 M KOH)  
[40:51] Stirrer speed set to 0  
[41:01] Datapoint id 32 collected  
[41:01] Charge balance equation is out by -0.9%  
[41:01] Stirrer speed set to 55  
[41:06] pH 3.02 -> 3.22  
[41:06] Using charge balance adjust  
[41:06] Dispensed 0.002987 mL of Base (0.5 M KOH)  
[41:26] Stirrer speed set to 0  
[41:36] Datapoint id 33 collected  
[41:36] Charge balance equation is out by -4.3%  
[41:36] Stirrer speed set to 55  
[41:41] pH 3.22 -> 3.42  
[41:41] Using charge balance adjust  
[41:42] Dispensed 0.002140 mL of Base (0.5 M KOH)  
[42:02] Stirrer speed set to 0  
[42:12] Datapoint id 34 collected  
[42:12] Charge balance equation is out by 40.8%  
[42:12] Stirrer speed set to 55  
[42:17] pH 3.51 -> 3.71  
[42:17] Using cautious pH adjust  
[42:17] Dispensed 0.000635 mL of Base (0.5 M KOH)  
[42:22] Stepping pH = 3.63  
[42:22] Dispensed 0.000259 mL of Base (0.5 M KOH)  
[42:27] Stepping pH = 3.69

Sample name: **M02\_octanol**  
Assay name: **pH-metric high logP**  
Assay ID: **18C-03012**  
Filename: **C:\Sirius\_T3\Mehtap\20180302\_exp29\_logP\_T3-2\18C-03012\_M02\_octanol\_pH-metric high logP.t3r**

Experiment start time: **3/3/2018 3:08:32 PM**  
Analyst: **Dorothy Levorse**  
Instrument ID: **T312060**

## Experiment Log (continued)

[42:27] Dispensed 0.000047 mL of Base (0.5 M KOH)  
[42:32] Stepping pH = 3.69  
[42:32] Dispensed 0.000165 mL of Base (0.5 M KOH)  
[42:38] Stepping pH = 3.74  
[42:53] Stirrer speed set to 0  
[43:03] Datapoint id 35 collected  
[43:03] Charge balance equation is out by 12.2%  
[43:03] Stirrer speed set to 55  
[43:08] pH 3.74 -> 3.94  
[43:08] Using charge balance adjust  
[43:08] Dispensed 0.000800 mL of Base (0.5 M KOH)  
[43:29] Stirrer speed set to 0  
[43:40] Datapoint id 36 collected  
[43:40] Charge balance equation is out by 38.4%  
[43:40] Stirrer speed set to 55  
[43:45] pH 4.03 -> 4.23  
[43:45] Using cautious pH adjust  
[43:45] Dispensed 0.000212 mL of Base (0.5 M KOH)  
[43:50] Stepping pH = 4.11  
[43:50] Dispensed 0.000188 mL of Base (0.5 M KOH)  
[43:55] Stepping pH = 4.23  
[44:10] Stirrer speed set to 0  
[44:22] Datapoint id 37 collected  
[44:22] Charge balance equation is out by 7.1%  
[44:22] Stirrer speed set to 55  
[44:27] pH 4.25 -> 4.45  
[44:27] Using charge balance adjust  
[44:27] Dispensed 0.000259 mL of Base (0.5 M KOH)  
[44:48] Stirrer speed set to 0  
[45:01] Datapoint id 38 collected  
[45:01] Charge balance equation is out by -1.3%  
[45:01] Stirrer speed set to 55  
[45:06] pH 4.47 -> 4.67  
[45:06] Using charge balance adjust  
[45:06] Dispensed 0.000165 mL of Base (0.5 M KOH)  
[45:26] Stirrer speed set to 0  
[45:40] Datapoint id 39 collected  
[45:40] Charge balance equation is out by -8.1%  
[45:40] Stirrer speed set to 55  
[45:45] pH 4.69 -> 4.89  
[45:45] Using charge balance adjust  
[45:45] Dispensed 0.000094 mL of Base (0.5 M KOH)  
[46:05] Stirrer speed set to 0  
[46:20] Datapoint id 40 collected  
[46:20] Charge balance equation is out by -45.8%  
[46:20] Stirrer speed set to 55  
[46:25] pH 4.84 -> 5.04  
[46:25] Using cautious pH adjust  
[46:26] Dispensed 0.000047 mL of Base (0.5 M KOH)  
[46:31] Stepping pH = 4.87  
[46:31] Dispensed 0.000071 mL of Base (0.5 M KOH)  
[46:36] Stepping pH = 5.07  
[46:51] Stirrer speed set to 0  
[47:14] Datapoint id 41 collected  
[47:14] Charge balance equation is out by -57.4%  
[47:14] Stirrer speed set to 55  
[47:19] pH 5.15 -> 5.35  
[47:19] Using cautious pH adjust  
[47:19] Dispensed 0.000024 mL of Base (0.5 M KOH)



Sample name: **M02\_octanol**  
 Assay name: **pH-metric high logP**  
 Assay ID: **18C-03012**  
 Filename: **C:\Sirius\_T3\Mehtap\20180302\_exp29\_logP\_T3-2\18C-03012\_M02\_octanol\_pH-metric high logP.t3r**

Experiment start time: **3/3/2018 3:08:32 PM**  
 Analyst: **Dorothy Levorse**  
 Instrument ID: **T312060**

## Experiment Log (continued)

[47:24] Stepping pH = 5.16  
 [47:24] Dispensed 0.000071 mL of Base (0.5 M KOH)  
 [47:29] Stepping pH = 5.51  
 [47:44] Stirrer speed set to 0  
 [48:27] Datapoint id 42 collected  
 [48:27] Charge balance equation is out by -88.9%  
 [48:27] Stirrer speed set to 55  
 [48:32] pH 5.71 -> 5.91  
 [48:32] Using cautious pH adjust  
 [48:32] Dispensed 0.000024 mL of Base (0.5 M KOH)  
 [48:37] Stepping pH = 5.76  
 [48:37] Dispensed 0.000024 mL of Base (0.5 M KOH)  
 [48:42] Stepping pH = 5.83  
 [48:42] Dispensed 0.000024 mL of Base (0.5 M KOH)  
 [48:47] Stepping pH = 6.06  
 [49:02] Stirrer speed set to 0  
 [49:57] Datapoint id 43 collected  
 [49:57] Charge balance equation is out by -92.8%  
 [49:57] Stirrer speed set to 55  
 [50:02] pH 6.20 -> 6.40  
 [50:02] Using cautious pH adjust  
 [50:02] Dispensed 0.000024 mL of Base (0.5 M KOH)  
 [50:07] Stepping pH = 6.23  
 [50:07] Dispensed 0.000047 mL of Base (0.5 M KOH)  
 [50:12] Stepping pH = 6.63  
 [50:27] Stirrer speed set to 0  
 [51:27] Datapoint id 44 collected  
 [51:27] Charge balance equation is out by -69.3%  
 [51:27] Stirrer speed set to 55  
 [51:32] pH 6.63 -> 6.83  
 [51:32] Using cautious pH adjust  
 [51:33] Dispensed 0.000024 mL of Base (0.5 M KOH)  
 [51:38] Stepping pH = 6.63  
 [51:38] Dispensed 0.000071 mL of Base (0.5 M KOH)  
 [51:43] Stepping pH = 7.07  
 [51:58] Stirrer speed set to 0  
 [52:58] Datapoint id 45 collected  
 [52:58] Charge balance equation is out by -214.8%  
 [52:58] Stirrer speed set to 55  
 [53:03] pH 7.25 -> 7.45  
 [53:03] Using cautious pH adjust  
 [53:03] Dispensed 0.000024 mL of Base (0.5 M KOH)  
 [53:08] Stepping pH = 7.27  
 [53:08] Dispensed 0.000024 mL of Base (0.5 M KOH)  
 [53:13] Stepping pH = 7.40  
 [53:13] Dispensed 0.000024 mL of Base (0.5 M KOH)  
 [53:18] Stepping pH = 7.65  
 [53:33] Stirrer speed set to 0  
 [54:34] Datapoint id 46 collected  
 [54:34] Charge balance equation is out by -403.0%  
 [54:34] Stirrer speed set to 55  
 [54:39] pH 7.78 -> 7.98  
 [54:39] Using cautious pH adjust  
 [54:39] Dispensed 0.000024 mL of Base (0.5 M KOH)  
 [54:44] Stepping pH = 7.88  
 [54:44] Dispensed 0.000024 mL of Base (0.5 M KOH)  
 [54:49] Stepping pH = 8.12  
 [55:04] Stirrer speed set to 0  
 [56:04] Datapoint id 47 collected

Sample name: **M02\_octanol**  
Assay name: **pH-metric high logP**  
Assay ID: **18C-03012**  
Filename: **C:\Sirius\_T3\Mehtap\20180302\_exp29\_logP\_T3-2\18C-03012\_M02\_octanol\_pH-metric high logP.t3r**

Experiment start time: **3/3/2018 3:08:32 PM**  
Analyst: **Dorothy Levorse**  
Instrument ID: **T312060**

## Experiment Log (continued)

[56:04] Charge balance equation is out by -511.7%  
[56:04] Stirrer speed set to 55  
[56:09] pH 8.34 -> 8.54  
[56:09] Using cautious pH adjust  
[56:09] Dispensed 0.000024 mL of Base (0.5 M KOH)  
[56:14] Stepping pH = 8.38  
[56:14] Dispensed 0.000024 mL of Base (0.5 M KOH)  
[56:19] Stepping pH = 8.53  
[56:35] Stirrer speed set to 0  
[57:32] Datapoint id 48 collected  
[57:32] Charge balance equation is out by -253.0%  
[57:32] Stirrer speed set to 55  
[57:37] pH 8.57 -> 8.77  
[57:37] Using cautious pH adjust  
[57:37] Dispensed 0.000024 mL of Base (0.5 M KOH)  
[57:42] Stepping pH = 8.59  
[57:42] Dispensed 0.000024 mL of Base (0.5 M KOH)  
[57:47] Stepping pH = 8.67  
[57:48] Dispensed 0.000024 mL of Base (0.5 M KOH)  
[57:53] Stepping pH = 8.77  
[58:08] Stirrer speed set to 0  
[58:38] Datapoint id 49 collected  
[58:38] Charge balance equation is out by -278.9%  
[58:38] Stirrer speed set to 55  
[58:43] pH 8.82 -> 9.02  
[58:43] Using cautious pH adjust  
[58:43] Dispensed 0.000024 mL of Base (0.5 M KOH)  
[58:49] Stepping pH = 8.83  
[58:49] Dispensed 0.000047 mL of Base (0.5 M KOH)  
[58:54] Stepping pH = 8.96  
[58:54] Dispensed 0.000024 mL of Base (0.5 M KOH)  
[58:59] Stepping pH = 9.04  
[59:14] Stirrer speed set to 0  
[59:39] Datapoint id 50 collected  
[59:39] Charge balance equation is out by -176.9%  
[59:39] Titration 3 of 3  
[59:39] Adding initial titrants  
[59:39] Automatically add 0.25000 mL of Octanol  
[59:45] Dispensed 0.250000 mL of Octanol  
[59:45] Stirrer speed set to 10  
[59:46] Stirrer speed set to 60  
[59:46] Iterative adjust 9.02 -> 2.00  
[59:46] pH 9.02 -> 2.00  
[59:47] Dispensed 0.056656 mL of Acid (0.5 M HCl)  
[59:53] pH 2.03 -> 2.00  
[59:53] Dispensed 0.002963 mL of Acid (0.5 M HCl)  
[1:00:43] Stirrer speed set to 0  
[1:00:53] Datapoint id 51 collected  
[1:00:53] Stirrer speed set to 60  
[1:00:58] pH 1.99 -> 2.19  
[1:00:58] Using cautious pH adjust  
[1:00:58] Dispensed 0.009784 mL of Base (0.5 M KOH)  
[1:01:04] Stepping pH = 2.06  
[1:01:04] Dispensed 0.008984 mL of Base (0.5 M KOH)  
[1:01:09] Stepping pH = 2.16  
[1:01:09] Dispensed 0.002117 mL of Base (0.5 M KOH)  
[1:01:14] Stepping pH = 2.19  
[1:01:29] Stirrer speed set to 0  
[1:01:45] Datapoint id 52 collected

Sample name: **M02\_octanol**  
Assay name: **pH-metric high logP**  
Assay ID: **18C-03012**  
Filename: **C:\Sirius\_T3\Mehtap\20180302\_exp29\_logP\_T3-2\18C-03012\_M02\_octanol\_pH-metric high logP.t3r**

Experiment start time: **3/3/2018 3:08:32 PM**  
Analyst: **Dorothy Levorse**  
Instrument ID: **T312060**

## Experiment Log (continued)

[1:01:45] Charge balance equation is out by -6.7%  
[1:01:45] Stirrer speed set to 60  
[1:01:50] pH 2.19 -> 2.39  
[1:01:50] Using charge balance adjust  
[1:01:50] Dispensed 0.013053 mL of Base (0.5 M KOH)  
[1:02:11] Stirrer speed set to 0  
[1:02:24] Datapoint id 53 collected  
[1:02:24] Charge balance equation is out by -6.1%  
[1:02:24] Stirrer speed set to 60  
[1:02:29] pH 2.38 -> 2.58  
[1:02:29] Using charge balance adjust  
[1:02:29] Dispensed 0.008984 mL of Base (0.5 M KOH)  
[1:02:49] Stirrer speed set to 0  
[1:02:59] Datapoint id 54 collected  
[1:02:59] Charge balance equation is out by 4.6%  
[1:02:59] Stirrer speed set to 60  
[1:03:04] pH 2.59 -> 2.79  
[1:03:04] Using charge balance adjust  
[1:03:05] Dispensed 0.006021 mL of Base (0.5 M KOH)  
[1:03:25] Stirrer speed set to 0  
[1:03:35] Datapoint id 55 collected  
[1:03:35] Charge balance equation is out by -0.8%  
[1:03:35] Stirrer speed set to 60  
[1:03:40] pH 2.79 -> 2.99  
[1:03:40] Using charge balance adjust  
[1:03:40] Dispensed 0.004116 mL of Base (0.5 M KOH)  
[1:04:00] Stirrer speed set to 0  
[1:04:12] Datapoint id 56 collected  
[1:04:12] Charge balance equation is out by 9.3%  
[1:04:12] Stirrer speed set to 60  
[1:04:17] pH 3.02 -> 3.22  
[1:04:17] Using charge balance adjust  
[1:04:17] Dispensed 0.002658 mL of Base (0.5 M KOH)  
[1:04:37] Stirrer speed set to 0  
[1:04:47] Datapoint id 57 collected  
[1:04:47] Charge balance equation is out by 29.0%  
[1:04:47] Stirrer speed set to 60  
[1:04:52] pH 3.29 -> 3.49  
[1:04:52] Using cautious pH adjust  
[1:04:52] Dispensed 0.000776 mL of Base (0.5 M KOH)  
[1:04:57] Stepping pH = 3.39  
[1:04:58] Dispensed 0.000494 mL of Base (0.5 M KOH)  
[1:05:03] Stepping pH = 3.47  
[1:05:03] Dispensed 0.000094 mL of Base (0.5 M KOH)  
[1:05:08] Stepping pH = 3.48  
[1:05:08] Dispensed 0.000094 mL of Base (0.5 M KOH)  
[1:05:13] Stepping pH = 3.49  
[1:05:28] Stirrer speed set to 0  
[1:05:39] Datapoint id 58 collected  
[1:05:39] Charge balance equation is out by 4.0%  
[1:05:39] Stirrer speed set to 60  
[1:05:44] pH 3.50 -> 3.70  
[1:05:44] Using charge balance adjust  
[1:05:44] Dispensed 0.000988 mL of Base (0.5 M KOH)  
[1:06:04] Stirrer speed set to 0  
[1:06:14] Datapoint id 59 collected  
[1:06:14] Charge balance equation is out by 16.0%  
[1:06:14] Stirrer speed set to 60  
[1:06:19] pH 3.74 -> 3.94

Sample name: **M02\_octanol**  
Assay name: **pH-metric high logP**  
Assay ID: **18C-03012**  
Filename: **C:\Sirius\_T3\Mehtap\20180302\_exp29\_logP\_T3-2\18C-03012\_M02\_octanol\_pH-metric high logP.t3r**

Experiment start time: **3/3/2018 3:08:32 PM**  
Analyst: **Dorothy Levorse**  
Instrument ID: **T312060**

## Experiment Log (continued)

[1:06:19] Using cautious pH adjust  
[1:06:19] Dispensed 0.000282 mL of Base (0.5 M KOH)  
[1:06:24] Stepping pH = 3.79  
[1:06:24] Dispensed 0.000400 mL of Base (0.5 M KOH)  
[1:06:29] Stepping pH = 3.99  
[1:06:45] Stirrer speed set to 0  
[1:06:55] Datapoint id 60 collected  
[1:06:55] Charge balance equation is out by -17.6%  
[1:06:55] Stirrer speed set to 60  
[1:07:00] pH 4.01 -> 4.21  
[1:07:00] Using cautious pH adjust  
[1:07:00] Dispensed 0.000165 mL of Base (0.5 M KOH)  
[1:07:05] Stepping pH = 4.07  
[1:07:05] Dispensed 0.000188 mL of Base (0.5 M KOH)  
[1:07:11] Stepping pH = 4.21  
[1:07:26] Stirrer speed set to 0  
[1:07:36] Datapoint id 61 collected  
[1:07:36] Charge balance equation is out by -10.9%  
[1:07:36] Stirrer speed set to 60  
[1:07:41] pH 4.22 -> 4.42  
[1:07:41] Using charge balance adjust  
[1:07:41] Dispensed 0.000188 mL of Base (0.5 M KOH)  
[1:08:01] Stirrer speed set to 0  
[1:08:15] Datapoint id 62 collected  
[1:08:15] Charge balance equation is out by 8.4%  
[1:08:15] Stirrer speed set to 60  
[1:08:20] pH 4.47 -> 4.67  
[1:08:20] Using charge balance adjust  
[1:08:20] Dispensed 0.000118 mL of Base (0.5 M KOH)  
[1:08:40] Stirrer speed set to 0  
[1:08:52] Datapoint id 63 collected  
[1:08:52] Charge balance equation is out by -24.3%  
[1:08:52] Stirrer speed set to 60  
[1:08:57] pH 4.65 -> 4.85  
[1:08:57] Using cautious pH adjust  
[1:08:57] Dispensed 0.000047 mL of Base (0.5 M KOH)  
[1:09:02] Stepping pH = 4.69  
[1:09:02] Dispensed 0.000071 mL of Base (0.5 M KOH)  
[1:09:07] Stepping pH = 4.89  
[1:09:22] Stirrer speed set to 0  
[1:09:36] Datapoint id 64 collected  
[1:09:36] Charge balance equation is out by -31.4%  
[1:09:36] Stirrer speed set to 60  
[1:09:41] pH 4.94 -> 5.14  
[1:09:41] Using cautious pH adjust  
[1:09:41] Dispensed 0.000024 mL of Base (0.5 M KOH)  
[1:09:46] Stepping pH = 4.94  
[1:09:46] Dispensed 0.000118 mL of Base (0.5 M KOH)  
[1:09:51] Stepping pH = 5.39  
[1:10:07] Stirrer speed set to 0  
[1:10:54] Datapoint id 65 collected  
[1:10:54] Charge balance equation is out by -203.1%  
[1:10:54] Stirrer speed set to 60  
[1:10:59] pH 5.56 -> 5.76  
[1:10:59] Using cautious pH adjust  
[1:10:59] Dispensed 0.000024 mL of Base (0.5 M KOH)  
[1:11:04] Stepping pH = 5.59  
[1:11:04] Dispensed 0.000047 mL of Base (0.5 M KOH)  
[1:11:10] Stepping pH = 5.78

Sample name: **M02\_octanol** Experiment start time: **3/3/2018 3:08:32 PM**  
 Assay name: **pH-metric high logP** Analyst: **Dorothy Levorse**  
 Assay ID: **18C-03012** Instrument ID: **T312060**  
 Filename: **C:\Sirius\_T3\Mehtap\20180302\_exp29\_logP\_T3-2\18C-03012\_M02\_octanol\_pH-metric high logP.t3r**

## Experiment Log (continued)

[1:11:25] Stirrer speed set to 0  
 [1:12:08] Datapoint id 66 collected  
 [1:12:08] Charge balance equation is out by -75.9%  
 [1:12:08] Stirrer speed set to 60  
 [1:12:13] pH 6.06 -> 6.26  
 [1:12:13] Using cautious pH adjust  
 [1:12:13] Dispensed 0.000024 mL of Base (0.5 M KOH)  
 [1:12:18] Stepping pH = 6.18  
 [1:12:18] Dispensed 0.000024 mL of Base (0.5 M KOH)  
 [1:12:23] Stepping pH = 6.42  
 [1:12:38] Stirrer speed set to 0  
 [1:13:38] Datapoint id 67 collected  
 [1:13:38] Charge balance equation is out by 2.6%  
 [1:13:38] Stirrer speed set to 60  
 [1:13:43] pH 6.36 -> 6.56  
 [1:13:43] Using charge balance adjust  
 [1:13:44] Dispensed 0.000047 mL of Base (0.5 M KOH)  
 [1:14:04] Stirrer speed set to 0  
 [1:15:04] Datapoint id 68 collected  
 [1:15:04] Charge balance equation is out by 56.6%  
 [1:15:04] Stirrer speed set to 60  
 [1:15:09] pH 6.79 -> 6.99  
 [1:15:09] Using cautious pH adjust  
 [1:15:09] Dispensed 0.000024 mL of Base (0.5 M KOH)  
 [1:15:14] Stepping pH = 6.87  
 [1:15:14] Dispensed 0.000024 mL of Base (0.5 M KOH)  
 [1:15:19] Stepping pH = 6.91  
 [1:15:19] Dispensed 0.000024 mL of Base (0.5 M KOH)  
 [1:15:24] Stepping pH = 7.04  
 [1:15:39] Stirrer speed set to 0  
 [1:16:39] Datapoint id 69 collected  
 [1:16:39] Charge balance equation is out by -89.8%  
 [1:16:39] Stirrer speed set to 60  
 [1:16:44] pH 7.20 -> 7.40  
 [1:16:44] Using cautious pH adjust  
 [1:16:44] Dispensed 0.000024 mL of Base (0.5 M KOH)  
 [1:16:50] Stepping pH = 7.19  
 [1:16:50] Dispensed 0.000047 mL of Base (0.5 M KOH)  
 [1:16:55] Stepping pH = 7.44  
 [1:17:10] Stirrer speed set to 0  
 [1:18:10] Datapoint id 70 collected  
 [1:18:10] Charge balance equation is out by -272.1%  
 [1:18:10] Stirrer speed set to 60  
 [1:18:15] pH 7.69 -> 7.89  
 [1:18:15] Using cautious pH adjust  
 [1:18:15] Dispensed 0.000024 mL of Base (0.5 M KOH)  
 [1:18:20] Stepping pH = 7.81  
 [1:18:20] Dispensed 0.000024 mL of Base (0.5 M KOH)  
 [1:18:25] Stepping pH = 8.01  
 [1:18:40] Stirrer speed set to 0  
 [1:19:40] Datapoint id 71 collected  
 [1:19:40] Charge balance equation is out by -351.4%  
 [1:19:40] Stirrer speed set to 60  
 [1:19:45] pH 8.10 -> 8.30  
 [1:19:45] Using cautious pH adjust  
 [1:19:45] Dispensed 0.000024 mL of Base (0.5 M KOH)  
 [1:19:51] Stepping pH = 8.16  
 [1:19:51] Dispensed 0.000024 mL of Base (0.5 M KOH)  
 [1:19:56] Stepping pH = 8.26

Sample name: **M02\_octanol**  
Assay name: **pH-metric high logP**  
Assay ID: **18C-03012**  
Filename: **C:\Sirius\_T3\Mehtap\20180302\_exp29\_logP\_T3-2\18C-03012\_M02\_octanol\_pH-metric high logP.t3r**

Experiment start time: **3/3/2018 3:08:32 PM**  
Analyst: **Dorothy Levorse**  
Instrument ID: **T312060**

## Experiment Log (continued)

[1:19:56] Dispensed 0.000024 mL of Base (0.5 M KOH)  
[1:20:01] Stepping pH = 8.39  
[1:20:16] Stirrer speed set to 0  
[1:21:16] Datapoint id 72 collected  
[1:21:16] Charge balance equation is out by -565.1%  
[1:21:16] Stirrer speed set to 60  
[1:21:21] pH 8.46 -> 8.66  
[1:21:21] Using cautious pH adjust  
[1:21:21] Dispensed 0.000024 mL of Base (0.5 M KOH)  
[1:21:26] Stepping pH = 8.52  
[1:21:26] Dispensed 0.000024 mL of Base (0.5 M KOH)  
[1:21:31] Stepping pH = 8.61  
[1:21:31] Dispensed 0.000024 mL of Base (0.5 M KOH)  
[1:21:36] Stepping pH = 8.71  
[1:21:52] Stirrer speed set to 0  
[1:22:25] Datapoint id 73 collected  
[1:22:25] Charge balance equation is out by -283.1%  
[1:22:25] Stirrer speed set to 60  
[1:22:30] pH 8.76 -> 8.96  
[1:22:30] Using cautious pH adjust  
[1:22:30] Dispensed 0.000024 mL of Base (0.5 M KOH)  
[1:22:35] Stepping pH = 8.80  
[1:22:35] Dispensed 0.000024 mL of Base (0.5 M KOH)  
[1:22:41] Stepping pH = 8.85  
[1:22:41] Dispensed 0.000047 mL of Base (0.5 M KOH)  
[1:22:46] Stepping pH = 8.91  
[1:22:46] Dispensed 0.000024 mL of Base (0.5 M KOH)  
[1:22:51] Stepping pH = 8.98  
[1:23:06] Stirrer speed set to 0  
[1:23:30] Datapoint id 74 collected  
[1:23:30] Charge balance equation is out by -271.8%  
[1:23:30] Stirrer speed set to 60  
[1:23:36] pH 8.99 -> 9.05  
[1:23:36] Using cautious pH adjust  
[1:23:36] Dispensed 0.000024 mL of Base (0.5 M KOH)  
[1:23:41] Stepping pH = 9.01  
[1:23:56] Stirrer speed set to 0  
[1:24:09] Datapoint id 75 collected  
[1:24:09] Charge balance equation is out by -70.9%  
[1:24:09] Argon flow rate set to 0  
[1:24:13] Titrator arm moved over Titration position
