# Supplementary material for: Octanol-water partition coefficient measurements for the SAMPL6 Blind Prediction Challenge
Source: bioRxiv or medRxiv preprint supplement (doi:10.1101/757393), 2019-12-02
Supplement: Supplementary file [file media-2.zip]

Sample name: **M07\_octanol**  
 Assay name: **pH-metric high logP**  
 Assay ID: **18B-28011**  
 Filename: **C:\Sirius\_T3\Mehtap\20180228\_exp28\_logP\_T3-2\18B-28011\_M07\_octanol\_pH-metric high logP.t3r**

Experiment start time: **2/28/2018 4:26:20 PM**  
 Analyst: **Pion**  
 Instrument ID: **T312060**

## pH-metric Result

logP (XH +) 0.44 ±0.03 (n=50)  
 logP (neutral X) 3.29 ±0.01 (n=50)

### 18B-28011 Points 1 to 22

M07\_octanol concentration factor 1.039  
 Carbonate 0.1202 mM  
 Acidity error 0.21327 mM

### 18B-28011 Points 23 to 45

M07\_octanol concentration factor 1.041  
 Carbonate 0.1876 mM  
 Acidity error 0.19535 mM

### 18B-28011 Points 46 to 79

M07\_octanol concentration factor 0.988  
 Carbonate 0.1406 mM  
 Acidity error 2.18588 mM

## Warnings and errors

Errors None  
 Warnings None

## Sample logD and percent species

| pH     | M07_octanol<br>logD | M07_octanol<br>M07_octanolH | M07_octanol<br>M07_octanol | M07_octanol<br>M07_octanolH* | M07_octanol<br>M07_octanol* | Comment    |
|--------|---------------------|-----------------------------|----------------------------|------------------------------|-----------------------------|------------|
| 1.000  | 0.45                | 26.38 %                     | 0.00 %                     | 73.19 %                      | 0.43 %                      | Stomach pH |
| 1.200  | 0.45                | 26.31 %                     | 0.00 %                     | 73.00 %                      | 0.69 %                      |            |
| 2.000  | 0.47                | 25.38 %                     | 0.00 %                     | 70.44 %                      | 4.18 %                      |            |
| 3.000  | 0.65                | 18.44 %                     | 0.02 %                     | 51.18 %                      | 30.36 %                     |            |
| 4.000  | 1.28                | 4.94 %                      | 0.04 %                     | 13.70 %                      | 81.31 %                     |            |
| 5.000  | 2.19                | 0.59 %                      | 0.05 %                     | 1.65 %                       | 97.71 %                     | Blood pH   |
| 6.000  | 2.95                | 0.06 %                      | 0.05 %                     | 0.17 %                       | 99.72 %                     |            |
| 6.500  | 3.15                | 0.02 %                      | 0.05 %                     | 0.05 %                       | 99.88 %                     |            |
| 7.000  | 3.24                | 0.01 %                      | 0.05 %                     | 0.02 %                       | 99.93 %                     |            |
| 7.400  | 3.27                | 0.00 %                      | 0.05 %                     | 0.01 %                       | 99.94 %                     |            |
| 8.000  | 3.28                | 0.00 %                      | 0.05 %                     | 0.00 %                       | 99.95 %                     |            |
| 9.000  | 3.29                | 0.00 %                      | 0.05 %                     | 0.00 %                       | 99.95 %                     |            |
| 10.000 | 3.29                | 0.00 %                      | 0.05 %                     | 0.00 %                       | 99.95 %                     |            |
| 11.000 | 3.29                | 0.00 %                      | 0.05 %                     | 0.00 %                       | 99.95 %                     |            |
| 12.000 | 3.29                | 0.00 %                      | 0.05 %                     | 0.00 %                       | 99.95 %                     |            |

Sample name: **M07\_octanol**  
 Assay name: **pH-metric high logP**  
 Assay ID: **18B-28011**  
 Filename: **C:\Sirius\_T3\Mehtap\20180228\_exp28\_logP\_T3-2\18B-28011\_M07\_octanol\_pH-metric high logP.t3r**

Experiment start time: **2/28/2018 4:26:20 PM**  
 Analyst: **Pion**  
 Instrument ID: **T312060**

## Graphs

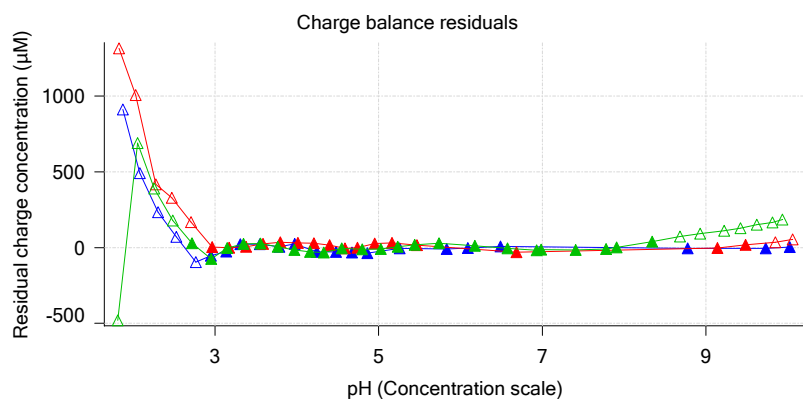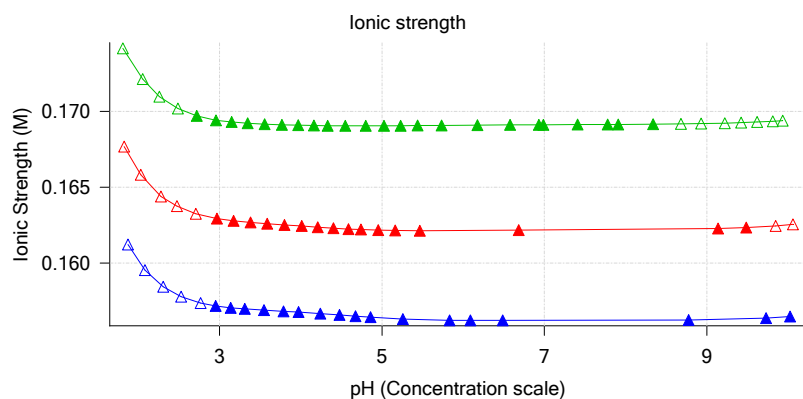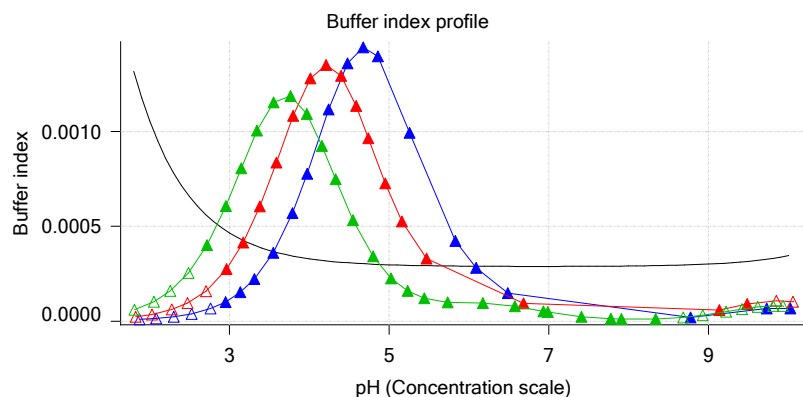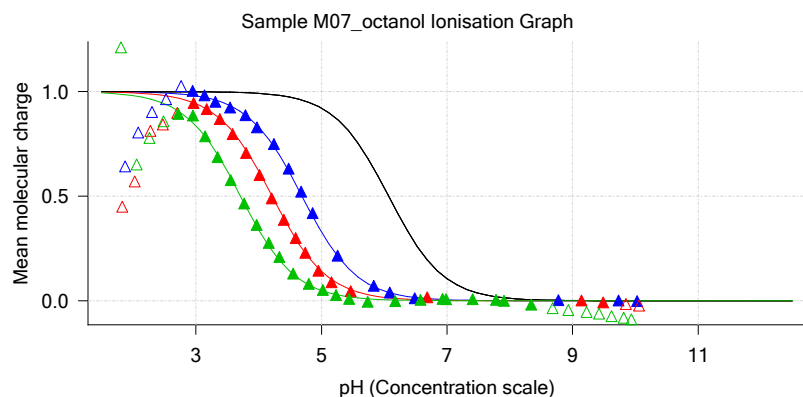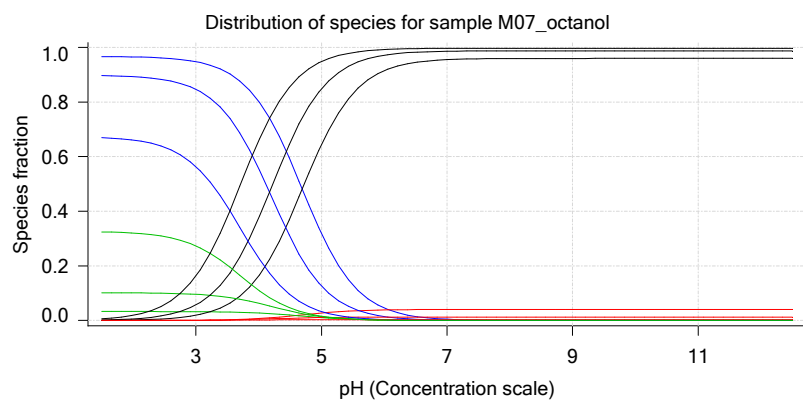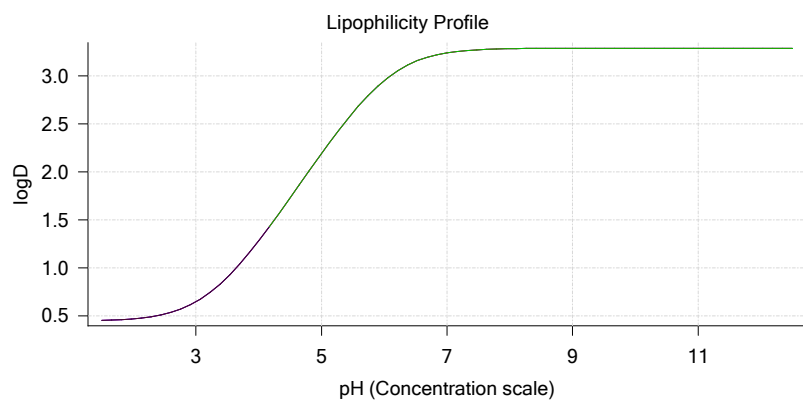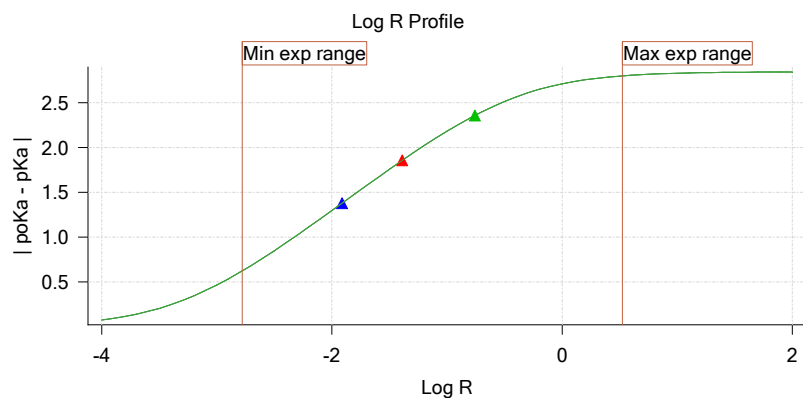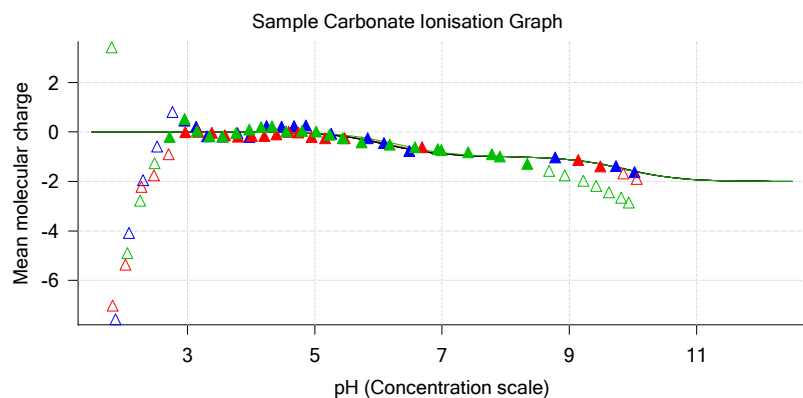

Sample name: **M07\_octanol**  
 Assay name: **pH-metric high logP**  
 Assay ID: **18B-28011**  
 Filename: **C:\Sirius\_T3\Mehtap\20180228\_exp28\_logP\_T3-2\18B-28011\_M07\_octanol\_pH-metric high logP.t3r**

Experiment start time: **2/28/2018 4:26:20 PM**  
 Analyst: **Pion**  
 Instrument ID: **T312060**

## Graphs (continued)

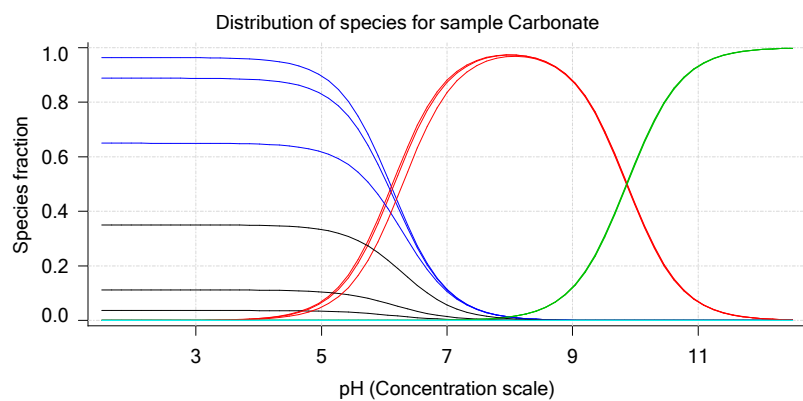

Sample name: **M07\_octanol**  
 Assay name: **pH-metric high logP**  
 Assay ID: **18B-28011**  
 Filename: **C:\Sirius\_T3\Mehtap\20180228\_exp28\_logP\_T3-2\18B-28011\_M07\_octanol\_pH-metric high logP.t3r**

Experiment start time: **2/28/2018 4:26:20 PM**  
 Analyst: **Pion**  
 Instrument ID: **T312060**

## pH-metric high logP Titration 1 of 3 18B-28011 Points 1 to 22

### Overall results

RMSD 0.037  
 Average ionic strength 0.157 M  
 Average temperature 25.0°C  
 Partition ratio 0.0123 : 1  
 Analyte concentration range 2362.2 µM to 2434.4 µM  
 Total points considered 17 of 22

### Warnings and errors

Errors None  
 Warnings None

### Four-Plus parameters

Alpha 0.130 2/28/2018 4:26:20 PM C:\Sirius\_T3\HCl18B27.t3r  
 S 0.9970 2/28/2018 4:26:20 PM C:\Sirius\_T3\HCl18B27.t3r  
 jH 0.8 2/28/2018 4:26:20 PM C:\Sirius\_T3\HCl18B27.t3r  
 jOH -0.4 2/28/2018 4:26:20 PM C:\Sirius\_T3\HCl18B27.t3r

### Titriments

0.50 M HCl 0.993513 2/28/2018 4:26:20 PM C:\Sirius\_T3\HCl18B27.t3r  
 0.50 M KOH 0.999845 2/28/2018 4:26:20 PM C:\Sirius\_T3\KOH18B27.t3r

### Sample

M07\_octanol concentration factor 1.039  
 Base pKa 1 6.07  
 logP (XH +) 0.50  
 logP (neutral X) 3.27

### Sample graphs

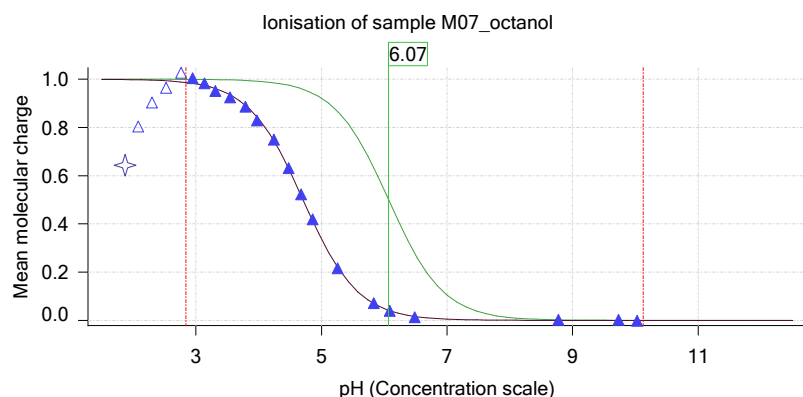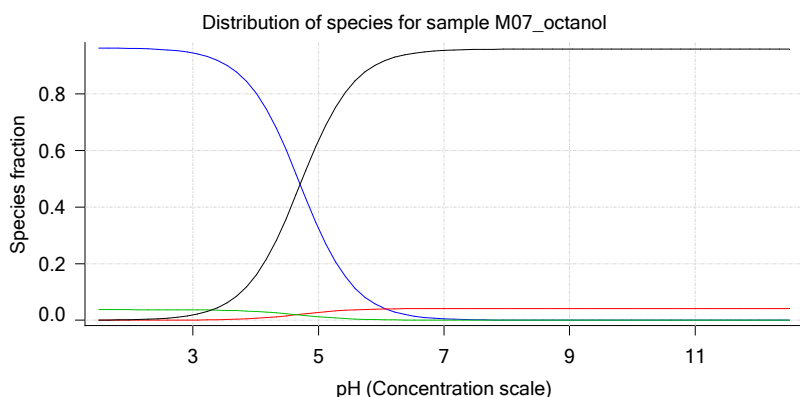

Sample name: **M07\_octanol**  
 Assay name: **pH-metric high logP**  
 Assay ID: **18B-28011**  
 Filename: **C:\Sirius\_T3\Mehtap\20180228\_exp28\_logP\_T3-2\18B-28011\_M07\_octanol\_pH-metric high logP.t3r**

Experiment start time: **2/28/2018 4:26:20 PM**  
 Analyst: **Pion**  
 Instrument ID: **T312060**

## Sample graphs (continued)

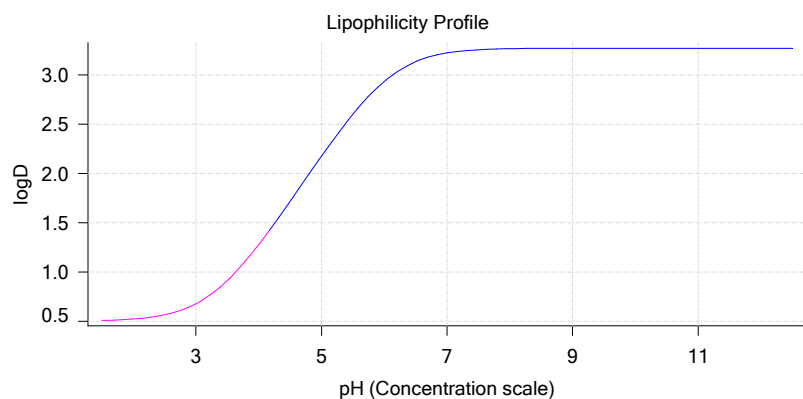

## Sample logD and percent species

| pH     | M07_octanol<br>logD | M07_octanol<br>M07_octanolH | M07_octanol<br>M07_octanolH | M07_octanol<br>M07_octanolH* | M07_octanol<br>M07_octanol* | Comment    |
|--------|---------------------|-----------------------------|-----------------------------|------------------------------|-----------------------------|------------|
| 1.000  | 0.50                | 96.24 %                     | 0.00 %                      | 3.74 %                       | 0.02 %                      | Stomach pH |
| 1.200  | 0.50                | 96.23 %                     | 0.00 %                      | 3.74 %                       | 0.03 %                      |            |
| 2.000  | 0.52                | 96.07 %                     | 0.01 %                      | 3.73 %                       | 0.19 %                      |            |
| 3.000  | 0.68                | 94.41 %                     | 0.08 %                      | 3.67 %                       | 1.84 %                      |            |
| 4.000  | 1.28                | 80.48 %                     | 0.69 %                      | 3.13 %                       | 15.71 %                     |            |
| 5.000  | 2.17                | 32.51 %                     | 2.77 %                      | 1.26 %                       | 63.46 %                     | Blood pH   |
| 6.000  | 2.93                | 4.67 %                      | 3.98 %                      | 0.18 %                       | 91.17 %                     |            |
| 6.500  | 3.13                | 1.53 %                      | 4.11 %                      | 0.06 %                       | 94.30 %                     |            |
| 7.000  | 3.22                | 0.49 %                      | 4.16 %                      | 0.02 %                       | 95.33 %                     |            |
| 7.400  | 3.25                | 0.20 %                      | 4.17 %                      | 0.01 %                       | 95.63 %                     |            |
| 8.000  | 3.27                | 0.05 %                      | 4.18 %                      | 0.00 %                       | 95.77 %                     |            |
| 9.000  | 3.27                | 0.00 %                      | 4.18 %                      | 0.00 %                       | 95.82 %                     |            |
| 10.000 | 3.27                | 0.00 %                      | 4.18 %                      | 0.00 %                       | 95.82 %                     |            |
| 11.000 | 3.27                | 0.00 %                      | 4.18 %                      | 0.00 %                       | 95.82 %                     |            |
| 12.000 | 3.27                | 0.00 %                      | 4.18 %                      | 0.00 %                       | 95.82 %                     |            |

## Carbonate and acidity

 Carbonate 0.120 mM  
 Acidity error 0.213 mM

## Other graphs

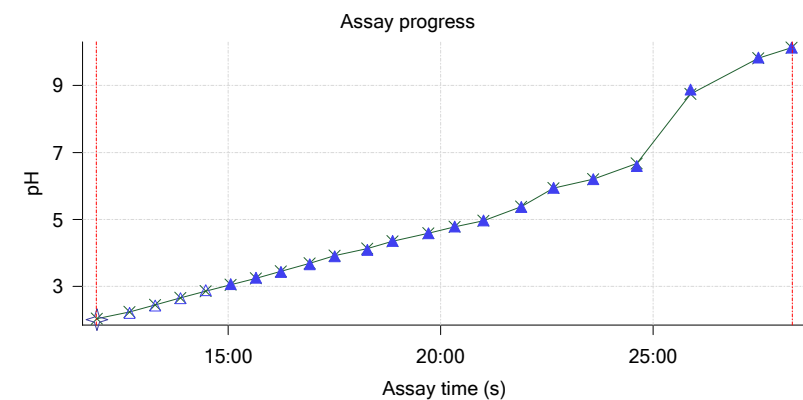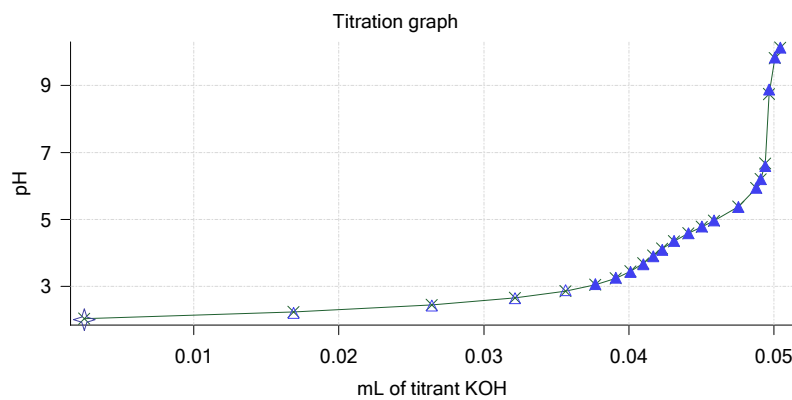

Sample name: **M07\_octanol**  
 Assay name: **pH-metric high logP**  
 Assay ID: **18B-28011**  
 Filename: **C:\Sirius\_T3\Mehtap\20180228\_exp28\_logP\_T3-2\18B-28011\_M07\_octanol\_pH-metric high logP.t3r**

Experiment start time: **2/28/2018 4:26:20 PM**  
 Analyst: **Pion**  
 Instrument ID: **T312060**

## Other graphs (continued)

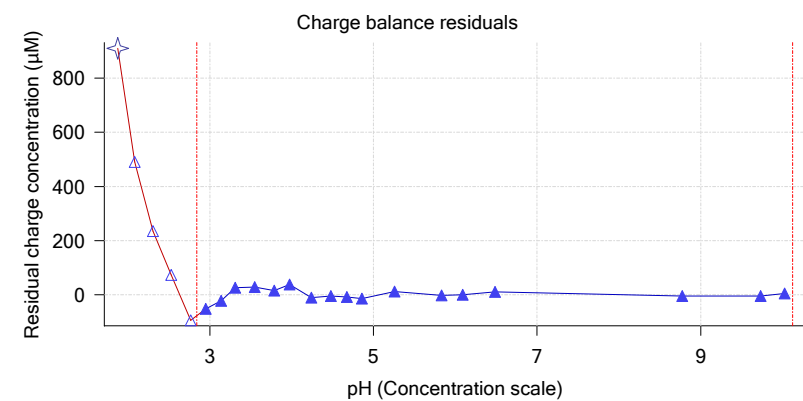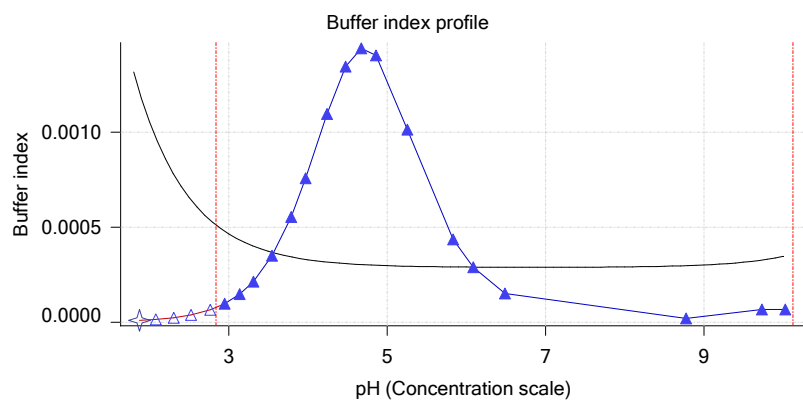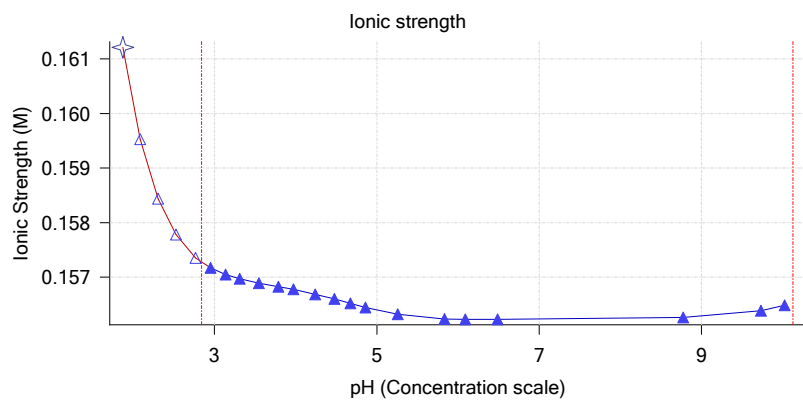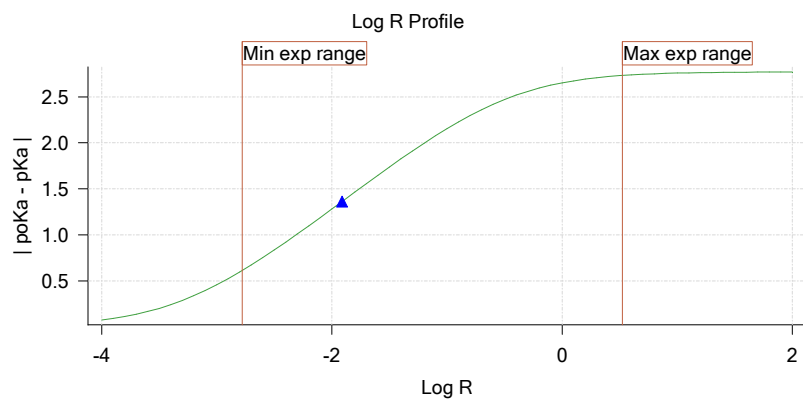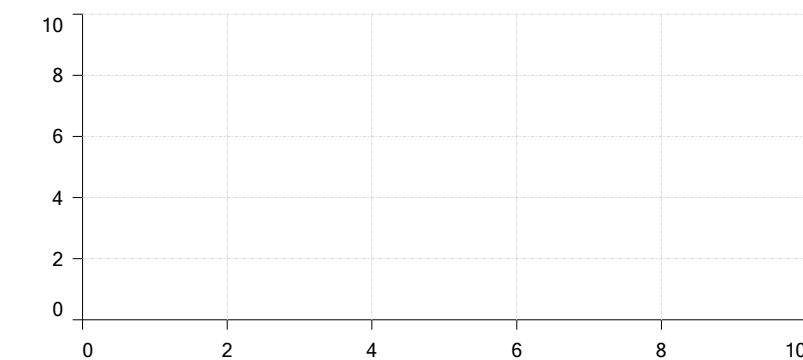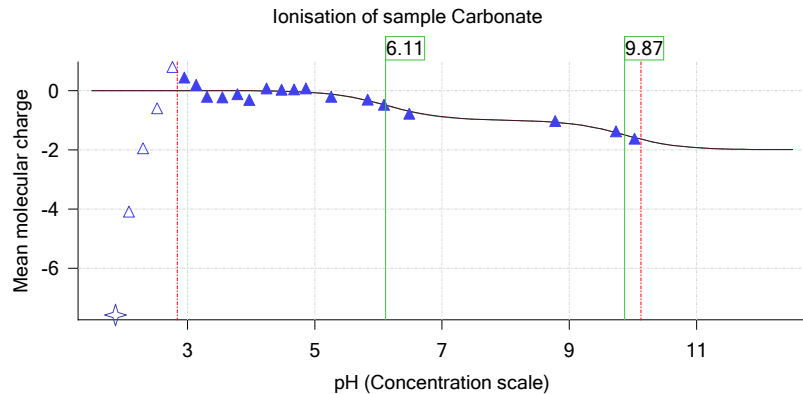

Sample name: **M07\_octanol**  
 Assay name: **pH-metric high logP**  
 Assay ID: **18B-28011**  
 Filename: **C:\Sirius\_T3\Mehtap\20180228\_exp28\_logP\_T3-2\18B-28011\_M07\_octanol\_pH-metric high logP.t3r**

Experiment start time: **2/28/2018 4:26:20 PM**  
 Analyst: **Pion**  
 Instrument ID: **T312060**

pH-metric high logP Titration 2 of 3 18B-28011 Points 23 to 45

## Overall results

RMSD 0.084  
 Average ionic strength 0.162 M  
 Average temperature 25.0°C  
 Partition ratio 0.0408 : 1  
 Analyte concentration range 2150.3 µM to 2218.8 µM  
 Total points considered 16 of 23

## Warnings and errors

Errors None  
 Warnings None

## Four-Plus parameters

Alpha 0.130 2/28/2018 4:26:20 PM C:\Sirius\_T3\HCl18B27.t3r  
 S 0.9970 2/28/2018 4:26:20 PM C:\Sirius\_T3\HCl18B27.t3r  
 jH 0.8 2/28/2018 4:26:20 PM C:\Sirius\_T3\HCl18B27.t3r  
 jOH -0.4 2/28/2018 4:26:20 PM C:\Sirius\_T3\HCl18B27.t3r

## Titrants

0.50 M HCl 0.993513 2/28/2018 4:26:20 PM C:\Sirius\_T3\HCl18B27.t3r  
 0.50 M KOH 0.999845 2/28/2018 4:26:20 PM C:\Sirius\_T3\KOH18B27.t3r

## Sample

M07\_octanol concentration factor 1.041  
 Base pKa 1 6.07  
 logP (XH +) 0.50  
 logP (neutral X) 3.31

## Sample graphs

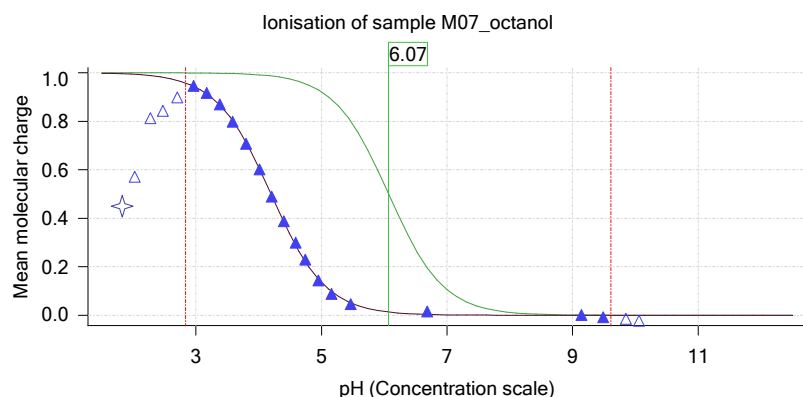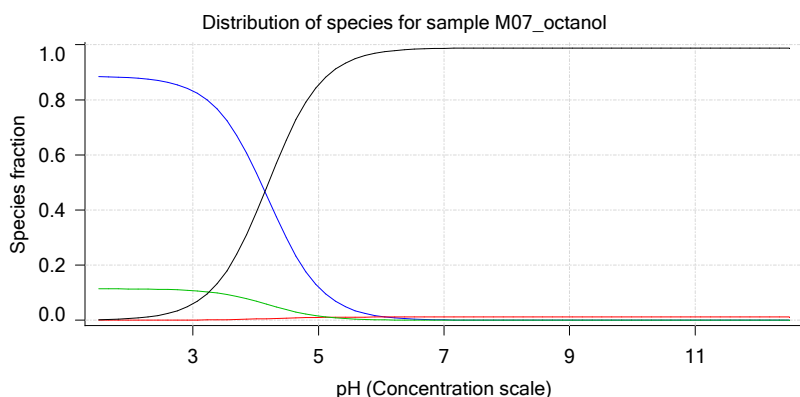

Sample name: **M07\_octanol**  
 Assay name: **pH-metric high logP**  
 Assay ID: **18B-28011**  
 Filename: **C:\Sirius\_T3\Mehtap\20180228\_exp28\_logP\_T3-2\18B-28011\_M07\_octanol\_pH-metric high logP.t3r**

Experiment start time: **2/28/2018 4:26:20 PM**  
 Analyst: **Pion**  
 Instrument ID: **T312060**

## Sample graphs (continued)

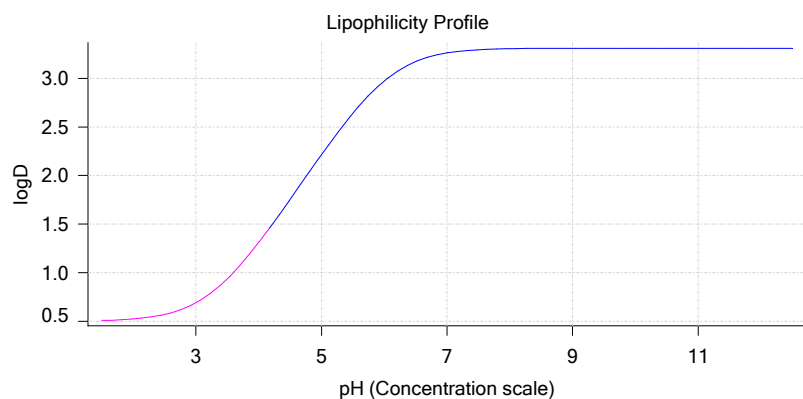

## Sample logD and percent species

| pH     | M07_octanol<br>logD | M07_octanol<br>M07_octanolH | M07_octanol<br>M07_octanolH | M07_octanol<br>M07_octanolH* | M07_octanol<br>M07_octanol* | Comment    |
|--------|---------------------|-----------------------------|-----------------------------|------------------------------|-----------------------------|------------|
| 1.000  | 0.50                | 88.51 %                     | 0.00 %                      | 11.43 %                      | 0.06 %                      | Stomach pH |
| 1.200  | 0.50                | 88.48 %                     | 0.00 %                      | 11.42 %                      | 0.10 %                      |            |
| 2.000  | 0.52                | 88.01 %                     | 0.01 %                      | 11.36 %                      | 0.63 %                      |            |
| 3.000  | 0.69                | 83.26 %                     | 0.07 %                      | 10.75 %                      | 5.92 %                      |            |
| 4.000  | 1.31                | 54.08 %                     | 0.46 %                      | 6.98 %                       | 38.48 %                     |            |
| 5.000  | 2.21                | 12.01 %                     | 1.02 %                      | 1.55 %                       | 85.42 %                     | Blood pH   |
| 6.000  | 2.97                | 1.37 %                      | 1.16 %                      | 0.18 %                       | 97.29 %                     |            |
| 6.500  | 3.17                | 0.44 %                      | 1.18 %                      | 0.06 %                       | 98.33 %                     |            |
| 7.000  | 3.26                | 0.14 %                      | 1.18 %                      | 0.02 %                       | 98.66 %                     |            |
| 7.400  | 3.29                | 0.06 %                      | 1.18 %                      | 0.01 %                       | 98.76 %                     |            |
| 8.000  | 3.31                | 0.01 %                      | 1.18 %                      | 0.00 %                       | 98.80 %                     |            |
| 9.000  | 3.31                | 0.00 %                      | 1.18 %                      | 0.00 %                       | 98.82 %                     |            |
| 10.000 | 3.31                | 0.00 %                      | 1.18 %                      | 0.00 %                       | 98.82 %                     |            |
| 11.000 | 3.31                | 0.00 %                      | 1.18 %                      | 0.00 %                       | 98.82 %                     |            |
| 12.000 | 3.31                | 0.00 %                      | 1.18 %                      | 0.00 %                       | 98.82 %                     |            |

## Carbonate and acidity

Carbonate 0.188 mM  
 Acidity error 0.195 mM

## Other graphs

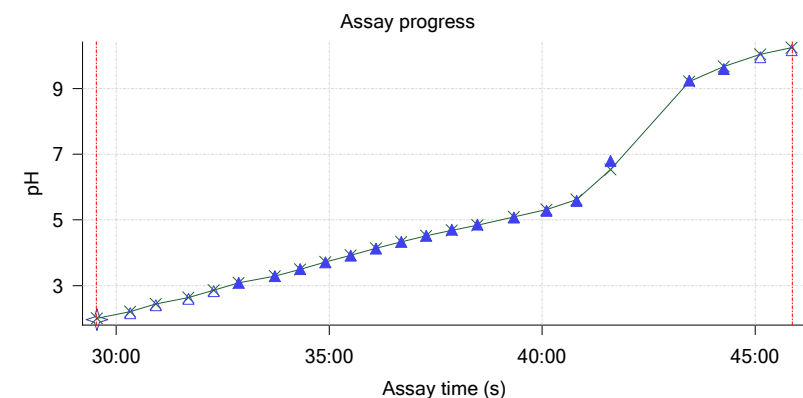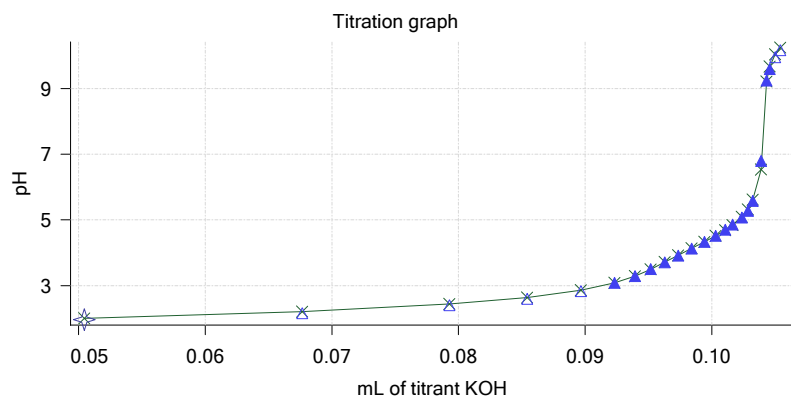



Sample name: **M07\_octanol**  
 Assay name: **pH-metric high logP**  
 Assay ID: **18B-28011**  
 Filename: **C:\Sirius\_T3\Mehtap\20180228\_exp28\_logP\_T3-2\18B-28011\_M07\_octanol\_pH-metric high logP.t3r**

Experiment start time: **2/28/2018 4:26:20 PM**  
 Analyst: **Pion**  
 Instrument ID: **T312060**

## Other graphs (continued)

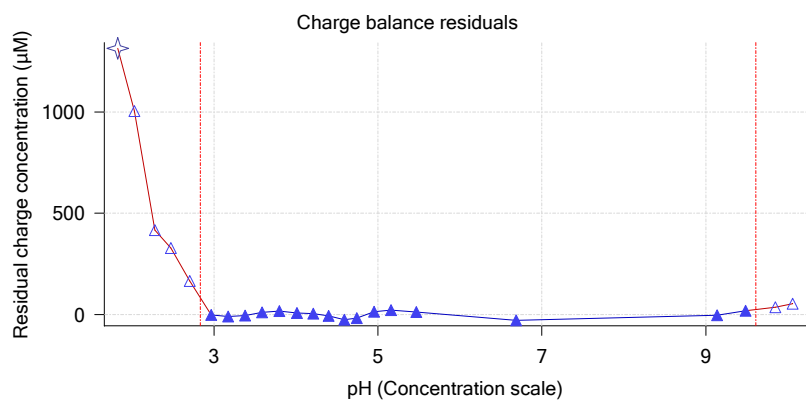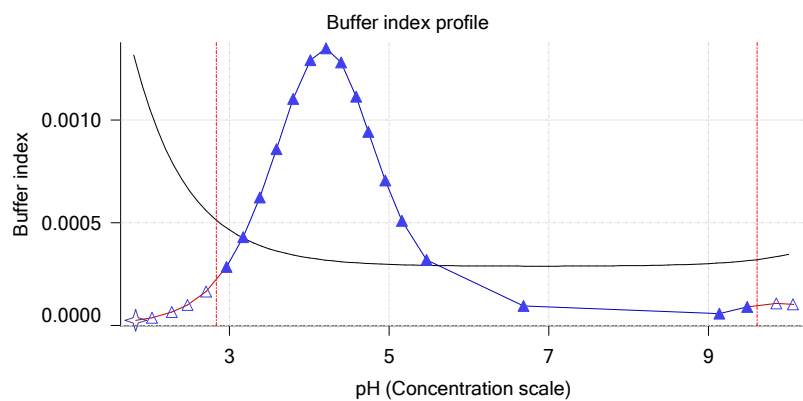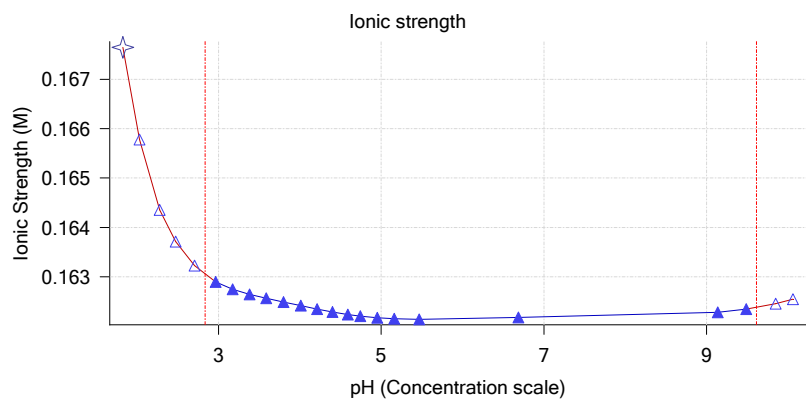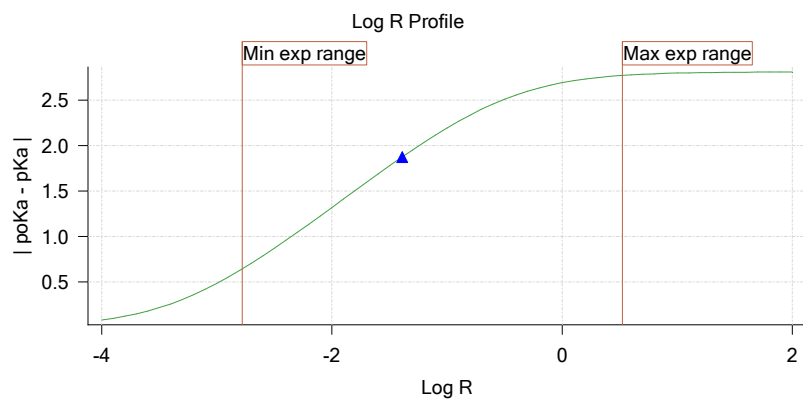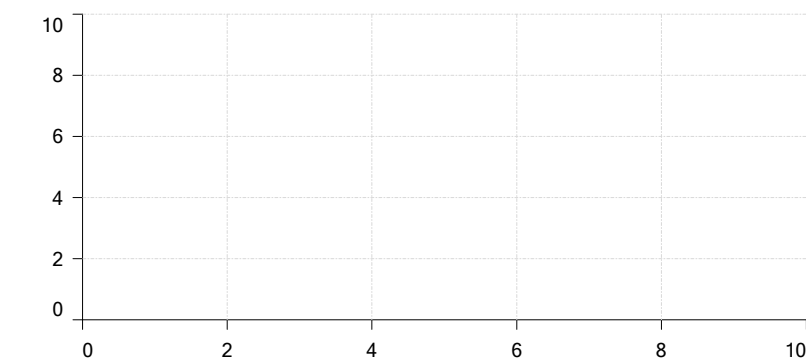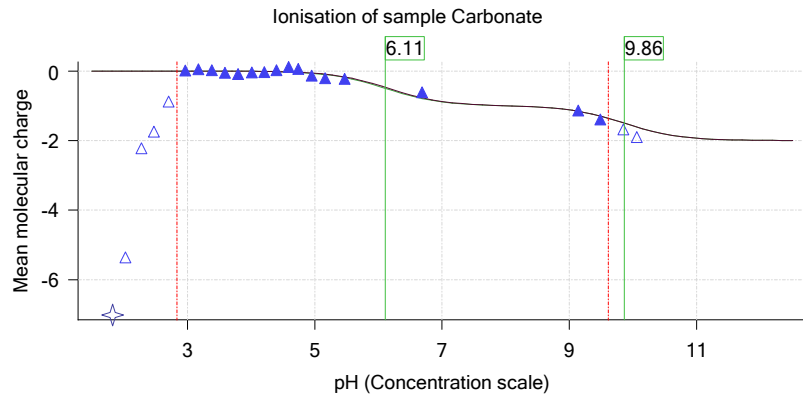

Sample name: **M07\_octanol**  
 Assay name: **pH-metric high logP**  
 Assay ID: **18B-28011**  
 Filename: **C:\Sirius\_T3\Mehtap\20180228\_exp28\_logP\_T3-2\18B-28011\_M07\_octanol\_pH-metric high logP.t3r**

Experiment start time: **2/28/2018 4:26:20 PM**  
 Analyst: **Pion**  
 Instrument ID: **T312060**

pH-metric high logP Titration 3 of 3 18B-28011 Points 46 to 79

## Overall results

RMSD 0.443  
 Average ionic strength 0.169 M  
 Average temperature 25.0°C  
 Partition ratio 0.1746 : 1  
 Analyte concentration range 1775.6 µM to 1831.9 µM  
 Total points considered 23 of 34

## Warnings and errors

Errors None  
 Warnings Excessive acidity error present

## Four-Plus parameters

Alpha 0.130 2/28/2018 4:26:20 PM C:\Sirius\_T3\HCl18B27.t3r  
 S 0.9970 2/28/2018 4:26:20 PM C:\Sirius\_T3\HCl18B27.t3r  
 jH 0.8 2/28/2018 4:26:20 PM C:\Sirius\_T3\HCl18B27.t3r  
 jOH -0.4 2/28/2018 4:26:20 PM C:\Sirius\_T3\HCl18B27.t3r

## Titrants

0.50 M HCl 0.993513 2/28/2018 4:26:20 PM C:\Sirius\_T3\HCl18B27.t3r  
 0.50 M KOH 0.999845 2/28/2018 4:26:20 PM C:\Sirius\_T3\KOH18B27.t3r

## Sample

M07\_octanol concentration factor 0.988  
 Base pKa 1 6.07  
 logP (XH +) 0.50  
 logP (neutral X) 3.30

## Sample graphs

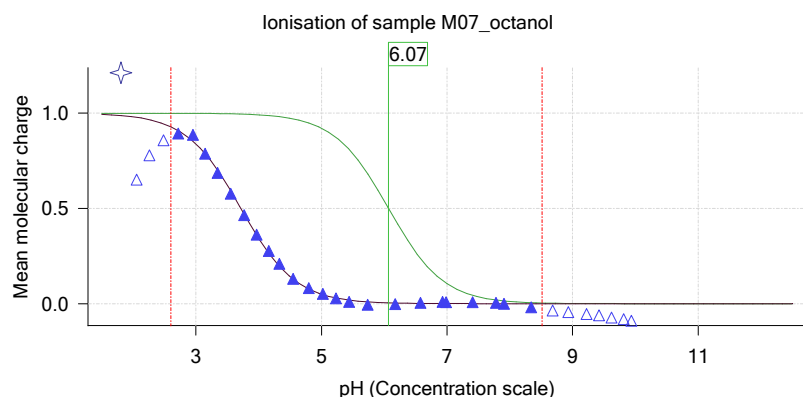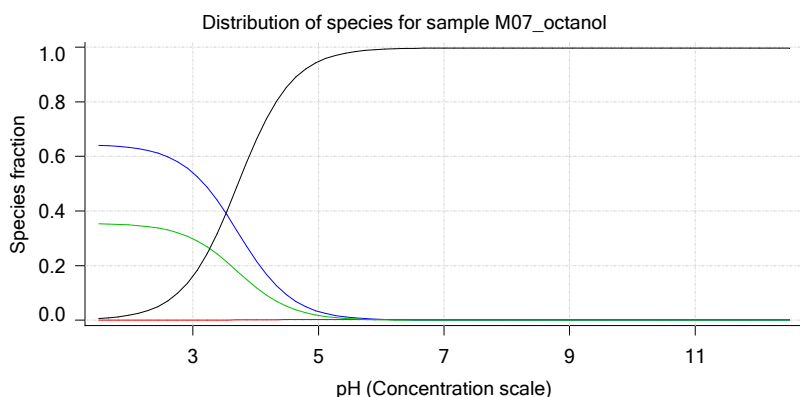

Sample name: **M07\_octanol**  
 Assay name: **pH-metric high logP**  
 Assay ID: **18B-28011**  
 Filename: **C:\Sirius\_T3\Mehtap\20180228\_exp28\_logP\_T3-2\18B-28011\_M07\_octanol\_pH-metric high logP.t3r**

Experiment start time: **2/28/2018 4:26:20 PM**  
 Analyst: **Pion**  
 Instrument ID: **T312060**

## Sample graphs (continued)

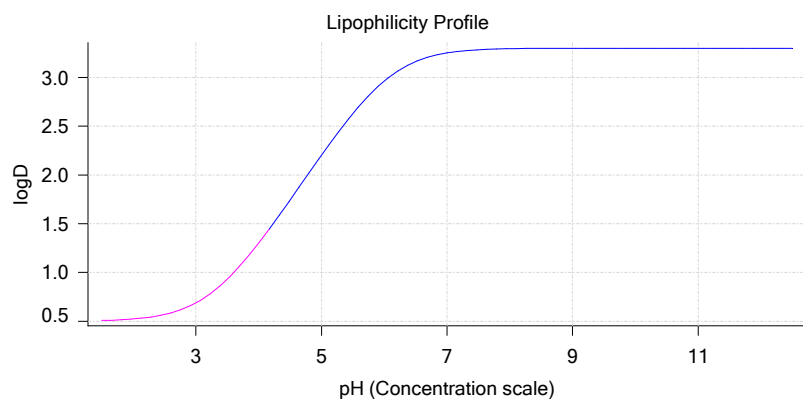

## Sample logD and percent species

| pH     | M07_octanol<br>logD | M07_octanol<br>M07_octanolH | M07_octanol<br>M07_octanolH | M07_octanol<br>M07_octanolH* | M07_octanol<br>M07_octanol* | Comment    |
|--------|---------------------|-----------------------------|-----------------------------|------------------------------|-----------------------------|------------|
| 1.000  | 0.50                | 64.31 %                     | 0.00 %                      | 35.50 %                      | 0.19 %                      | Stomach pH |
| 1.200  | 0.50                | 64.24 %                     | 0.00 %                      | 35.46 %                      | 0.30 %                      |            |
| 2.000  | 0.52                | 63.22 %                     | 0.01 %                      | 34.90 %                      | 1.88 %                      |            |
| 3.000  | 0.69                | 54.07 %                     | 0.05 %                      | 29.85 %                      | 16.04 %                     |            |
| 4.000  | 1.30                | 22.09 %                     | 0.19 %                      | 12.19 %                      | 65.53 %                     |            |
| 5.000  | 2.20                | 3.20 %                      | 0.27 %                      | 1.76 %                       | 94.77 %                     | Blood pH   |
| 6.000  | 2.96                | 0.33 %                      | 0.28 %                      | 0.18 %                       | 99.20 %                     |            |
| 6.500  | 3.16                | 0.11 %                      | 0.29 %                      | 0.06 %                       | 99.55 %                     |            |
| 7.000  | 3.25                | 0.03 %                      | 0.29 %                      | 0.02 %                       | 99.66 %                     |            |
| 7.400  | 3.28                | 0.01 %                      | 0.29 %                      | 0.01 %                       | 99.69 %                     |            |
| 8.000  | 3.30                | 0.00 %                      | 0.29 %                      | 0.00 %                       | 99.71 %                     |            |
| 9.000  | 3.30                | 0.00 %                      | 0.29 %                      | 0.00 %                       | 99.71 %                     |            |
| 10.000 | 3.30                | 0.00 %                      | 0.29 %                      | 0.00 %                       | 99.71 %                     |            |
| 11.000 | 3.30                | 0.00 %                      | 0.29 %                      | 0.00 %                       | 99.71 %                     |            |
| 12.000 | 3.30                | 0.00 %                      | 0.29 %                      | 0.00 %                       | 99.71 %                     |            |

## Carbonate and acidity

 Carbonate 0.141 mM  
 Acidity error 2.186 mM

## Other graphs

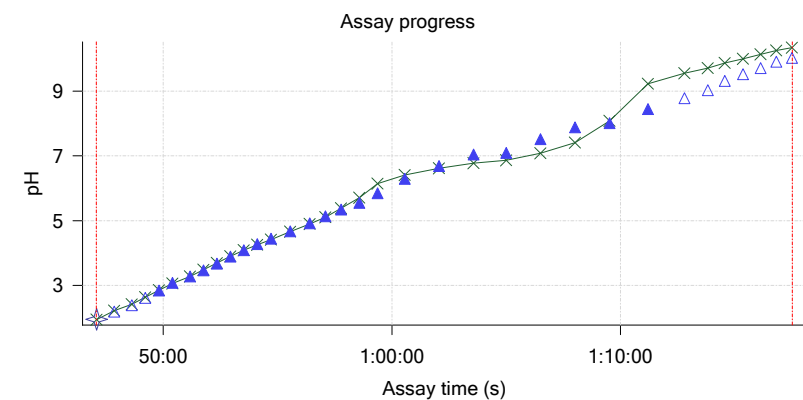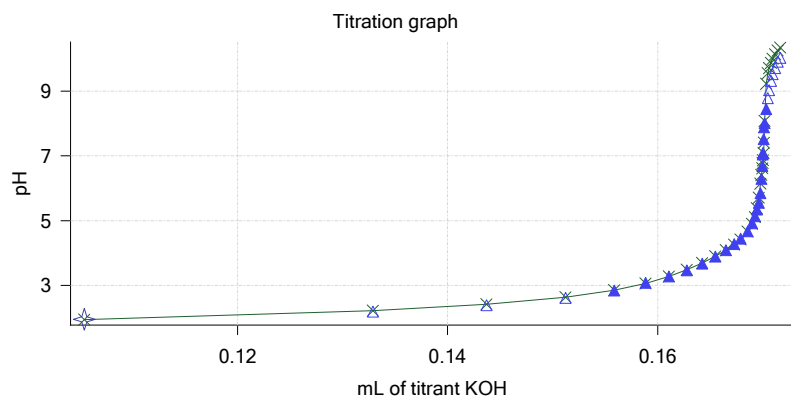

Sample name: **M07\_octanol**  
 Assay name: **pH-metric high logP**  
 Assay ID: **18B-28011**  
 Filename: **C:\Sirius\_T3\Mehtap\20180228\_exp28\_logP\_T3-2\18B-28011\_M07\_octanol\_pH-metric high logP.t3r**

Experiment start time: **2/28/2018 4:26:20 PM**  
 Analyst: **Pion**  
 Instrument ID: **T312060**

## Other graphs (continued)

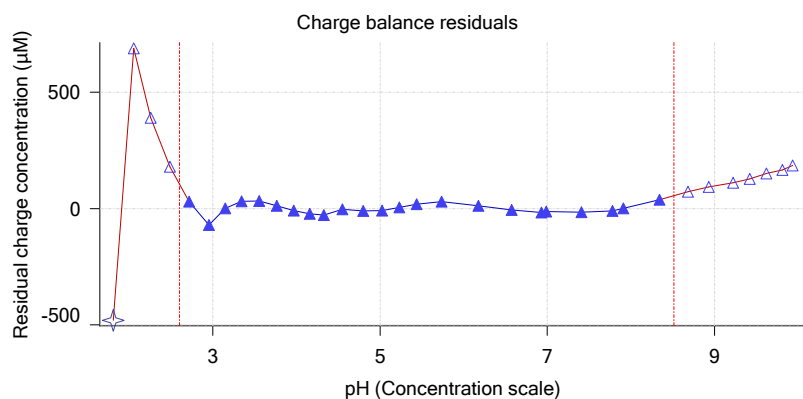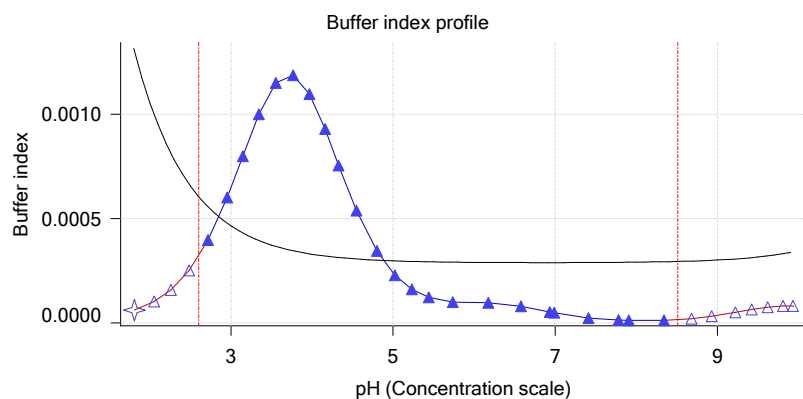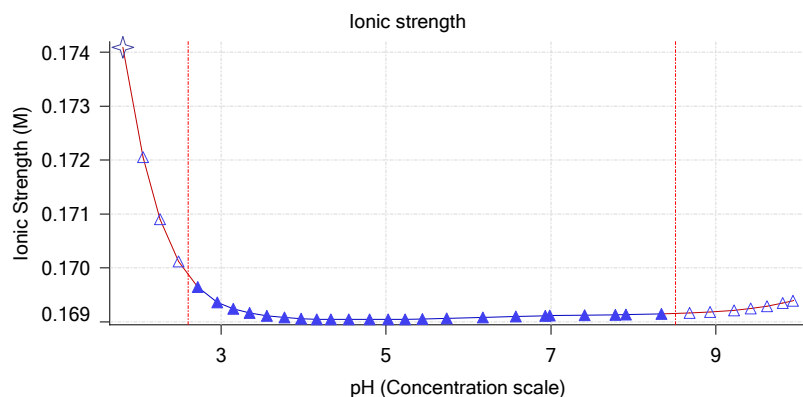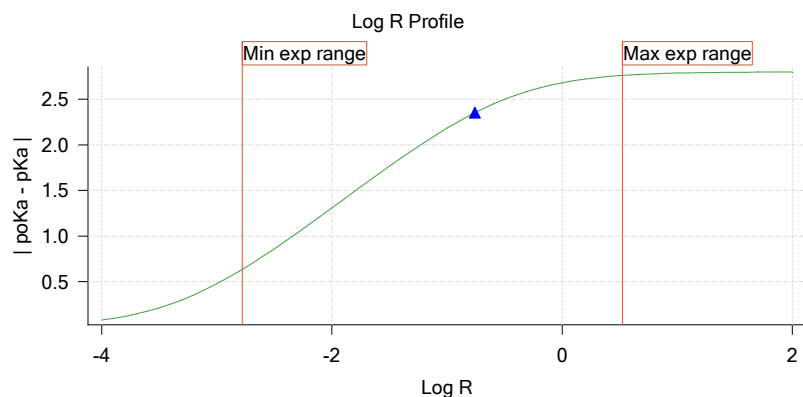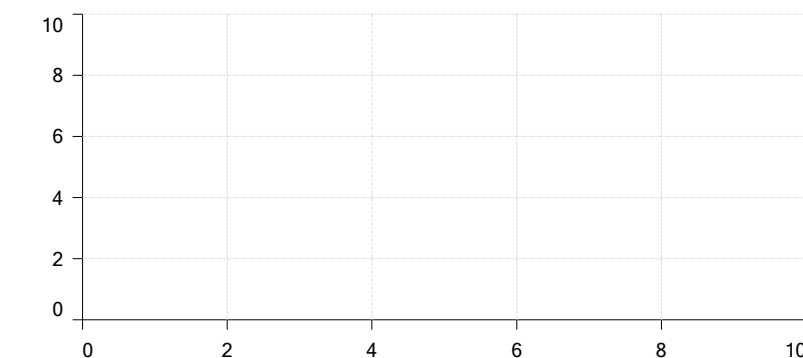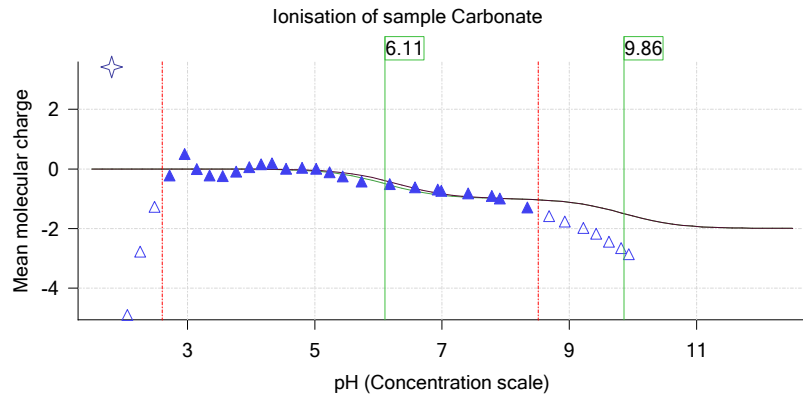

Sample name: **M07\_octanol**  
 Assay name: **pH-metric high logP**  
 Assay ID: **18B-28011**  
 Filename: **C:\Sirius\_T3\Mehtap\20180228\_exp28\_logP\_T3-2\18B-28011\_M07\_octanol\_pH-metric high logP.t3r**

Experiment start time: **2/28/2018 4:26:20 PM**  
 Analyst: **Pion**  
 Instrument ID: **T312060**

## Assay Model

| Settings                          | Value        | Date/Time changed    | Imported from      |
|-----------------------------------|--------------|----------------------|--------------------|
| Sample name                       | M07_octanol  | 2/27/2018 4:29:24 PM | User entered value |
| Sample by                         | Weight       |                      | Default value      |
| Sample weight                     | 0.000900 g   | 2/28/2018 4:24:06 PM | User entered value |
| Formula weight                    | 235.28 g/mol | 2/27/2018 4:29:24 PM | User entered value |
| Solubility                        | Unknown      |                      | Default value      |
| Molecular weight                  | 235.28       | 2/27/2018 4:29:24 PM | User entered value |
| Individual pKa ionic environments | No           |                      | Default value      |
| Number of pKas                    | 1            | 2/27/2018 4:29:24 PM | User entered value |
| Sample is a                       | Base         | 2/27/2018 4:29:24 PM | User entered value |
| pKa 1                             | 6.07         | 2/27/2018 4:29:24 PM | User entered value |
| logp (XH +)                       | 0.50         | 2/28/2018 1:33:04 PM | User entered value |
| logP (neutral X)                  | 3.44         | 2/28/2018 1:33:10 PM | User entered value |

## Events

| Time    | Event             | Water      | Acid       | Base       | Octanol    | pH     | dpH/dt   | pH R-squared | pH SD   | dpH/dt time         |
|---------|-------------------|------------|------------|------------|------------|--------|----------|--------------|---------|---------------------|
| 8:55.6  | Initial pH = 6.32 |            |            |            |            |        |          |              |         |                     |
| 11:55.1 | Data point 1      | 1.50000 mL | 0.04887 mL | 0.00245 mL | 0.01999 mL | 2.007  | -0.00759 | 0.43163      | 0.00057 | 10.0 s              |
| 12:41.2 | Data point 2      | 1.50000 mL | 0.04887 mL | 0.01689 mL | 0.01999 mL | 2.212  | -0.00650 | 0.83933      | 0.00035 | 10.5 s              |
| 13:17.4 | Data point 3      | 1.50000 mL | 0.04887 mL | 0.02641 mL | 0.01999 mL | 2.431  | -0.00986 | 0.77807      | 0.00055 | 10.0 s              |
| 13:52.9 | Data point 4      | 1.50000 mL | 0.04887 mL | 0.03215 mL | 0.01999 mL | 2.651  | -0.00451 | 0.66680      | 0.00027 | 10.0 s              |
| 14:28.4 | Data point 5      | 1.50000 mL | 0.04887 mL | 0.03563 mL | 0.01999 mL | 2.888  | -0.00773 | 0.36187      | 0.00063 | 10.0 s              |
| 15:03.8 | Data point 6      | 1.50000 mL | 0.04887 mL | 0.03770 mL | 0.01999 mL | 3.072  | -0.00302 | 0.21499      | 0.00032 | 10.0 s              |
| 15:39.3 | Data point 7      | 1.50000 mL | 0.04887 mL | 0.03911 mL | 0.01999 mL | 3.259  | -0.00406 | 0.30171      | 0.00036 | 10.0 s              |
| 16:14.6 | Data point 8      | 1.50000 mL | 0.04887 mL | 0.04012 mL | 0.01999 mL | 3.431  | -0.00336 | 0.75731      | 0.00019 | 10.0 s              |
| 16:55.2 | Data point 9      | 1.50000 mL | 0.04887 mL | 0.04099 mL | 0.01999 mL | 3.667  | -0.00529 | 0.80865      | 0.00029 | 10.0 s              |
| 17:30.5 | Data point 10     | 1.50000 mL | 0.04887 mL | 0.04167 mL | 0.01999 mL | 3.906  | -0.01649 | 0.89884      | 0.00086 | 10.5 s              |
| 18:16.6 | Data point 11     | 1.50000 mL | 0.04887 mL | 0.04231 mL | 0.01999 mL | 4.090  | -0.00742 | 0.86888      | 0.00039 | 10.0 s              |
| 18:52.0 | Data point 12     | 1.50000 mL | 0.04887 mL | 0.04311 mL | 0.01999 mL | 4.359  | -0.01526 | 0.79653      | 0.00084 | 10.0 s              |
| 19:43.0 | Data point 13     | 1.50000 mL | 0.04887 mL | 0.04412 mL | 0.01999 mL | 4.593  | -0.01458 | 0.78492      | 0.00081 | 11.5 s              |
| 20:19.9 | Data point 14     | 1.50000 mL | 0.04887 mL | 0.04504 mL | 0.01999 mL | 4.792  | -0.01834 | 0.83155      | 0.00099 | 15.0 s              |
| 21:00.3 | Data point 15     | 1.50000 mL | 0.04887 mL | 0.04588 mL | 0.01999 mL | 4.975  | -0.01816 | 0.89144      | 0.00095 | 12.5 s              |
| 21:53.9 | Data point 16     | 1.50000 mL | 0.04887 mL | 0.04755 mL | 0.01999 mL | 5.371  | -0.01774 | 0.89163      | 0.00093 | 15.0 s              |
| 22:39.5 | Data point 17     | 1.50000 mL | 0.04887 mL | 0.04880 mL | 0.01999 mL | 5.944  | -0.01937 | 0.91808      | 0.00100 | 25.5 s              |
| 23:35.6 | Data point 18     | 1.50000 mL | 0.04887 mL | 0.04911 mL | 0.01999 mL | 6.201  | -0.01860 | 0.87008      | 0.00098 | 25.5 s              |
| 24:36.8 | Data point 19     | 1.50000 mL | 0.04887 mL | 0.04941 mL | 0.01999 mL | 6.598  | -0.01882 | 0.95235      | 0.00095 | 40.0 s              |
| 25:52.5 | Data point 20     | 1.50000 mL | 0.04887 mL | 0.04967 mL | 0.01999 mL | 8.879  | -0.02286 | 0.13576      | 0.00307 | Timed out at 59.5 s |
| 27:28.2 | Data point 21     | 1.50000 mL | 0.04887 mL | 0.05007 mL | 0.01999 mL | 9.833  | -0.01571 | 0.67713      | 0.00094 | 16.5 s              |
| 28:15.3 | Data point 22     | 1.50000 mL | 0.04887 mL | 0.05045 mL | 0.01999 mL | 10.125 | -0.01833 | 0.90348      | 0.00095 | 18.5 s              |
| 29:33.1 | Data point 23     | 1.50000 mL | 0.10350 mL | 0.05045 mL | 0.06999 mL | 1.961  | -0.00524 | 0.41258      | 0.00040 | 10.5 s              |
| 30:19.8 | Data point 24     | 1.50000 mL | 0.10350 mL | 0.06766 mL | 0.06999 mL | 2.160  | -0.01414 | 0.83789      | 0.00076 | 10.5 s              |
| 30:56.0 | Data point 25     | 1.50000 mL | 0.10350 mL | 0.07928 mL | 0.06999 mL | 2.405  | 0.00314  | 0.09186      | 0.00051 | 10.0 s              |
| 31:42.0 | Data point 26     | 1.50000 mL | 0.10350 mL | 0.08542 mL | 0.06999 mL | 2.598  | -0.00349 | 0.57578      | 0.00023 | 10.0 s              |
| 32:17.4 | Data point 27     | 1.50000 mL | 0.10350 mL | 0.08968 mL | 0.06999 mL | 2.829  | -0.00230 | 0.56610      | 0.00015 | 10.0 s              |
| 32:52.8 | Data point 28     | 1.50000 mL | 0.10350 mL | 0.09231 mL | 0.06999 mL | 3.088  | -0.00226 | 0.48854      | 0.00016 | 10.0 s              |
| 33:43.8 | Data point 29     | 1.50000 mL | 0.10350 mL | 0.09393 mL | 0.06999 mL | 3.295  | 0.00205  | 0.02071      | 0.00070 | 10.0 s              |
| 34:19.2 | Data point 30     | 1.50000 mL | 0.10350 mL | 0.09518 mL | 0.06999 mL | 3.501  | -0.00570 | 0.60687      | 0.00036 | 10.0 s              |
| 34:54.6 | Data point 31     | 1.50000 mL | 0.10350 mL | 0.09628 mL | 0.06999 mL | 3.707  | -0.00228 | 0.44952      | 0.00017 | 10.5 s              |
| 35:30.6 | Data point 32     | 1.50000 mL | 0.10350 mL | 0.09734 mL | 0.06999 mL | 3.917  | -0.00812 | 0.27411      | 0.00077 | 10.0 s              |
| 36:06.0 | Data point 33     | 1.50000 mL | 0.10350 mL | 0.09840 mL | 0.06999 mL | 4.130  | -0.00941 | 0.30499      | 0.00084 | 10.0 s              |
| 36:41.4 | Data point 34     | 1.50000 mL | 0.10350 mL | 0.09941 mL | 0.06999 mL | 4.327  | 0.00167  | 0.00821      | 0.00091 | 10.0 s              |
| 37:16.9 | Data point 35     | 1.50000 mL | 0.10350 mL | 0.10031 mL | 0.06999 mL | 4.517  | -0.00558 | 0.51690      | 0.00038 | 10.5 s              |
| 37:52.8 | Data point 36     | 1.50000 mL | 0.10350 mL | 0.10106 mL | 0.06999 mL | 4.705  | -0.00463 | 0.40740      | 0.00036 | 10.5 s              |
| 38:28.8 | Data point 37     | 1.50000 mL | 0.10350 mL | 0.10165 mL | 0.06999 mL | 4.857  | -0.00336 | 0.10816      | 0.00050 | 10.5 s              |
| 39:20.2 | Data point 38     | 1.50000 mL | 0.10350 mL | 0.10237 mL | 0.06999 mL | 5.067  | -0.00648 | 0.11307      | 0.00095 | 10.5 s              |
| 40:06.4 | Data point 39     | 1.50000 mL | 0.10350 mL | 0.10285 mL | 0.06999 mL | 5.275  | 0.00498  | 0.07222      | 0.00091 | 11.5 s              |

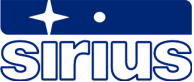

## Assay Events

Sample name: **M07\_octanol**  
Assay name: **pH-metric high logP**  
Assay ID: **18B-28011**  
Filename: **C:\Sirius\_T3\Mehtap\20180228\_exp28\_logP\_T3-2\18B-28011\_M07\_octanol\_pH-metric high logP.t3r**

Experiment start time: **2/28/2018 4:26:20 PM**  
Analyst: **Pion**  
Instrument ID: **T312060**

## Events (continued)

| Time      | Event         | Water      | Acid       | Base       | Octanol    | pH     | dpH/dt   | pH R-squared | pH SD   | dpH/dt time         |
|-----------|---------------|------------|------------|------------|------------|--------|----------|--------------|---------|---------------------|
| 40:48.5   | Data point 40 | 1.50000 mL | 0.10350 mL | 0.10325 mL | 0.06999 mL | 5.581  | -0.01086 | 0.46682      | 0.00078 | 12.0 s              |
| 41:36.2   | Data point 41 | 1.50000 mL | 0.10350 mL | 0.10388 mL | 0.06999 mL | 6.795  | -0.04882 | 0.99621      | 0.00241 | Timed out at 59.5 s |
| 43:27.1   | Data point 42 | 1.50000 mL | 0.10350 mL | 0.10433 mL | 0.06999 mL | 9.241  | -0.00847 | 0.26017      | 0.00082 | 18.5 s              |
| 44:16.0   | Data point 43 | 1.50000 mL | 0.10350 mL | 0.10459 mL | 0.06999 mL | 9.587  | -0.01617 | 0.74261      | 0.00093 | 21.0 s              |
| 45:07.4   | Data point 44 | 1.50000 mL | 0.10350 mL | 0.10501 mL | 0.06999 mL | 9.949  | -0.01841 | 0.93681      | 0.00094 | 13.5 s              |
| 45:51.4   | Data point 45 | 1.50000 mL | 0.10350 mL | 0.10541 mL | 0.06999 mL | 10.160 | -0.00819 | 0.56417      | 0.00054 | 10.0 s              |
| 47:05.4   | Data point 46 | 1.50000 mL | 0.16268 mL | 0.10541 mL | 0.31999 mL | 1.946  | -0.00597 | 0.52848      | 0.00041 | 10.0 s              |
| 47:51.7   | Data point 47 | 1.50000 mL | 0.16268 mL | 0.13290 mL | 0.31999 mL | 2.185  | 0.00614  | 0.38583      | 0.00049 | 10.0 s              |
| 48:37.7   | Data point 48 | 1.50000 mL | 0.16268 mL | 0.14372 mL | 0.31999 mL | 2.386  | -0.00203 | 0.41833      | 0.00016 | 10.0 s              |
| 49:13.2   | Data point 49 | 1.50000 mL | 0.16268 mL | 0.15122 mL | 0.31999 mL | 2.611  | 0.01311  | 0.84025      | 0.00071 | 10.0 s              |
| 49:48.7   | Data point 50 | 1.50000 mL | 0.16268 mL | 0.15588 mL | 0.31999 mL | 2.842  | 0.00403  | 0.34986      | 0.00034 | 10.0 s              |
| 50:24.2   | Data point 51 | 1.50000 mL | 0.16268 mL | 0.15887 mL | 0.31999 mL | 3.077  | -0.00378 | 0.75203      | 0.00022 | 10.0 s              |
| 51:10.1   | Data point 52 | 1.50000 mL | 0.16268 mL | 0.16108 mL | 0.31999 mL | 3.269  | 0.00384  | 0.15940      | 0.00048 | 10.0 s              |
| 51:45.5   | Data point 53 | 1.50000 mL | 0.16268 mL | 0.16279 mL | 0.31999 mL | 3.466  | -0.00301 | 0.05747      | 0.00062 | 10.0 s              |
| 52:20.9   | Data point 54 | 1.50000 mL | 0.16268 mL | 0.16425 mL | 0.31999 mL | 3.673  | 0.00201  | 0.08022      | 0.00035 | 10.0 s              |
| 52:56.4   | Data point 55 | 1.50000 mL | 0.16268 mL | 0.16550 mL | 0.31999 mL | 3.886  | -0.00573 | 0.82166      | 0.00031 | 10.0 s              |
| 53:31.7   | Data point 56 | 1.50000 mL | 0.16268 mL | 0.16651 mL | 0.31999 mL | 4.087  | -0.00755 | 0.87150      | 0.00040 | 10.0 s              |
| 54:07.0   | Data point 57 | 1.50000 mL | 0.16268 mL | 0.16731 mL | 0.31999 mL | 4.277  | -0.00644 | 0.13717      | 0.00086 | 10.0 s              |
| 54:42.4   | Data point 58 | 1.50000 mL | 0.16268 mL | 0.16790 mL | 0.31999 mL | 4.446  | -0.01161 | 0.50856      | 0.00080 | 10.0 s              |
| 55:33.2   | Data point 59 | 1.50000 mL | 0.16268 mL | 0.16858 mL | 0.31999 mL | 4.665  | -0.00119 | 0.00535      | 0.00080 | 10.5 s              |
| 56:24.4   | Data point 60 | 1.50000 mL | 0.16268 mL | 0.16900 mL | 0.31999 mL | 4.916  | -0.00586 | 0.09627      | 0.00093 | 10.5 s              |
| 57:05.5   | Data point 61 | 1.50000 mL | 0.16268 mL | 0.16926 mL | 0.31999 mL | 5.139  | 0.00326  | 0.04495      | 0.00076 | 11.0 s              |
| 57:47.1   | Data point 62 | 1.50000 mL | 0.16268 mL | 0.16947 mL | 0.31999 mL | 5.345  | -0.00065 | 0.00209      | 0.00070 | 11.5 s              |
| 58:34.2   | Data point 63 | 1.50000 mL | 0.16268 mL | 0.16964 mL | 0.31999 mL | 5.553  | 0.00764  | 0.15851      | 0.00095 | 12.5 s              |
| 59:22.4   | Data point 64 | 1.50000 mL | 0.16268 mL | 0.16980 mL | 0.31999 mL | 5.848  | -0.01710 | 0.92021      | 0.00088 | 35.5 s              |
| 1:00:33.7 | Data point 65 | 1.50000 mL | 0.16268 mL | 0.16990 mL | 0.31999 mL | 6.288  | -0.01881 | 0.94810      | 0.00095 | 59.5 s              |
| 1:02:03.8 | Data point 66 | 1.50000 mL | 0.16268 mL | 0.16997 mL | 0.31999 mL | 6.686  | -0.05982 | 0.98248      | 0.00298 | Timed out at 59.5 s |
| 1:03:34.3 | Data point 67 | 1.50000 mL | 0.16268 mL | 0.17001 mL | 0.31999 mL | 7.040  | -0.07343 | 0.98170      | 0.00366 | Timed out at 59.5 s |
| 1:04:59.6 | Data point 68 | 1.50000 mL | 0.16268 mL | 0.17004 mL | 0.31999 mL | 7.096  | -0.04310 | 0.98785      | 0.00214 | Timed out at 59.5 s |
| 1:06:30.2 | Data point 69 | 1.50000 mL | 0.16268 mL | 0.17008 mL | 0.31999 mL | 7.517  | -0.07608 | 0.99474      | 0.00377 | Timed out at 59.5 s |
| 1:08:00.6 | Data point 70 | 1.50000 mL | 0.16268 mL | 0.17013 mL | 0.31999 mL | 7.886  | -0.06164 | 0.99333      | 0.00306 | Timed out at 59.5 s |
| 1:09:31.1 | Data point 71 | 1.50000 mL | 0.16268 mL | 0.17018 mL | 0.31999 mL | 8.015  | -0.04517 | 0.98471      | 0.00225 | Timed out at 59.5 s |
| 1:11:11.9 | Data point 72 | 1.50000 mL | 0.16268 mL | 0.17034 mL | 0.31999 mL | 8.445  | -0.02344 | 0.95432      | 0.00119 | Timed out at 59.5 s |
| 1:12:47.5 | Data point 73 | 1.50000 mL | 0.16268 mL | 0.17051 mL | 0.31999 mL | 8.787  | -0.01486 | 0.61766      | 0.00093 | 20.5 s              |
| 1:13:48.8 | Data point 74 | 1.50000 mL | 0.16268 mL | 0.17063 mL | 0.31999 mL | 9.033  | -0.01484 | 0.60375      | 0.00094 | 13.5 s              |
| 1:14:33.0 | Data point 75 | 1.50000 mL | 0.16268 mL | 0.17079 mL | 0.31999 mL | 9.324  | -0.01384 | 0.49067      | 0.00098 | 17.5 s              |
| 1:15:21.1 | Data point 76 | 1.50000 mL | 0.16268 mL | 0.17096 mL | 0.31999 mL | 9.524  | -0.01653 | 0.72433      | 0.00096 | 10.5 s              |
| 1:16:07.3 | Data point 77 | 1.50000 mL | 0.16268 mL | 0.17119 mL | 0.31999 mL | 9.720  | -0.01049 | 0.45814      | 0.00077 | 10.5 s              |
| 1:16:48.4 | Data point 78 | 1.50000 mL | 0.16268 mL | 0.17145 mL | 0.31999 mL | 9.913  | -0.00202 | 0.02625      | 0.00062 | 10.5 s              |
| 1:17:29.5 | Data point 79 | 1.50000 mL | 0.16268 mL | 0.17168 mL | 0.31999 mL | 10.034 | -0.01309 | 0.45959      | 0.00095 | 13.0 s              |
| 1:17:51.5 | Assay volumes | 1.50000 mL | 0.16268 mL | 0.17168 mL | 0.31999 mL |        |          |              |         |                     |

Sample name: **M07\_octanol**  
 Assay name: **pH-metric high logP**  
 Assay ID: **18B-28011**  
 Filename: **C:\Sirius\_T3\Mehtap\20180228\_exp28\_logP\_T3-2\18B-28011\_M07\_octanol\_pH-metric high logP.t3r**

Experiment start time: **2/28/2018 4:26:20 PM**  
 Analyst: **Pion**  
 Instrument ID: **T312060**

## Assay Settings

| Setting                             | Value              | Original Value | Date/Time changed | Imported from |
|-------------------------------------|--------------------|----------------|-------------------|---------------|
| <b>General Settings</b>             |                    |                |                   |               |
| Analyst name                        | Pion               |                |                   |               |
| <b>Standard Experiment Settings</b> |                    |                |                   |               |
| Number of titrations                | 3                  |                |                   |               |
| Minimum pH                          | 2.000              |                |                   |               |
| Maximum pH                          | 10.000             |                |                   |               |
| pH step between points of           | 0.200              |                |                   |               |
| Minimum titrant addition            | 0.00002 mL         |                |                   |               |
| Maximum titrant addition            | 0.10000 mL         |                |                   |               |
| Argon flow rate                     | 100%               |                |                   |               |
| Start titration using               | Cautious pH adjust |                |                   |               |
| <b>Advanced General Settings</b>    |                    |                |                   |               |
| Detect turbidity using              | None               |                |                   |               |
| Collect turbidity sensor data       | No                 |                |                   |               |
| Collect UV spectra                  | No                 |                |                   |               |
| Stir after titrant addition for     | 5 seconds          |                |                   |               |
| For titrant addition, stir at       | 10%                |                |                   |               |
| <b>Titration Pre-Dose</b>           |                    |                |                   |               |
| Titration pre-dose                  | None               |                |                   |               |
| <b>Assay Medium</b>                 |                    |                |                   |               |
| ISA water volume                    | 1.50 mL            |                |                   |               |
| Water added                         | Automatic          |                |                   |               |
| Partition solvent type              | Octanol            |                |                   |               |
| Partition volume                    | 0.020 mL           |                |                   |               |
| Partition solvent added             | Automatic          |                |                   |               |
| After partition addition, stir for  | 1 seconds          |                |                   |               |
| <b>Sample Sonication</b>            |                    |                |                   |               |
| Sonicate                            | Yes                |                |                   |               |
| Adjust pH for sonication            | No                 |                |                   |               |
| Sonicate for                        | 300 seconds        |                |                   |               |
| After sonication stir for           | 5 seconds          |                |                   |               |
| <b>Sample Dissolution</b>           |                    |                |                   |               |
| Perform a dissolution stage         | Yes                |                |                   |               |
| Adjust and hold pH for dissolution  | To start pH        |                |                   |               |
| Stir to dissolve for                | 120 seconds        |                |                   |               |
| For dissolution, stir at            | 10%                |                |                   |               |
| <b>Carbonate purge</b>              |                    |                |                   |               |
| Perform a carbonate purge           | No                 |                |                   |               |
| <b>Temperature Control</b>          |                    |                |                   |               |
| Wait for temperature                | Yes                |                |                   |               |
| Required start temperature          | 25.0°C             |                |                   |               |
| Acceptable deviation                | 0.5°C              |                |                   |               |
| Time to wait                        | 60 seconds         |                |                   |               |
| Stir speed of                       | 50%                |                |                   |               |
| <b>Titration 1</b>                  |                    |                |                   |               |
| Titrate from                        | Low to high pH     |                |                   |               |
| Adjust to start pH                  | Yes                |                |                   |               |
| After pH adjust stir for            | 30 seconds         |                |                   |               |
| Stir to allow partitioning for      | 15 seconds         |                |                   |               |
| Stirrer speed for partitioning      | 50%                |                |                   |               |
| <b>Titration 2</b>                  |                    |                |                   |               |
| Titrate from                        | Low to high pH     |                |                   |               |
| Add additional water                | 0.00 mL            |                |                   |               |
| Additional partition solvent volume | 0.050 mL           |                |                   |               |
| Additional partition solvent added  | Automatic          |                |                   |               |
| After pH adjust stir for            | 30 seconds         |                |                   |               |
| Stir to allow partitioning for      | 15 seconds         |                |                   |               |
| Stirrer speed for partitioning      | 55%                |                |                   |               |



Sample name: **M07\_octanol**  
 Assay name: **pH-metric high logP**  
 Assay ID: **18B-28011**  
 Filename: **C:\Sirius\_T3\Mehtap\20180228\_exp28\_logP\_T3-2\18B-28011\_M07\_octanol\_pH-metric high logP.t3r**

Experiment start time: **2/28/2018 4:26:20 PM**  
 Analyst: **Pion**  
 Instrument ID: **T312060**

## Assay Settings (continued)

| Setting                             | Value          | Original Value | Date/Time changed | Imported from |
|-------------------------------------|----------------|----------------|-------------------|---------------|
| <b>Titration 3</b>                  |                |                |                   |               |
| Titrate from                        | Low to high pH |                |                   |               |
| Add additional water                | 0.00 mL        |                |                   |               |
| Additional partition solvent volume | 0.250 mL       |                |                   |               |
| Additional partition solvent added  | Automatic      |                |                   |               |
| After pH adjust stir for            | 30 seconds     |                |                   |               |
| Stir to allow partitioning for      | 15 seconds     |                |                   |               |
| Stirrer speed for partitioning      | 60%            |                |                   |               |
| <b>Data Point Stability</b>         |                |                |                   |               |
| Stir during data point collection   | No             |                |                   |               |
| Delay before data point collection  | 0 seconds      |                |                   |               |
| Number of points to average         | 20 points      |                |                   |               |
| Time interval between points        | 0.50 seconds   |                |                   |               |
| Required maximum standard deviation | 0.00100 dpH/dt |                |                   |               |
| Stability timeout after             | 60 seconds     |                |                   |               |

## Calibration Settings

| Setting                   | Value  | Date/Time changed    | Imported from             |
|---------------------------|--------|----------------------|---------------------------|
| Four-Plus alpha           | 0.130  | 2/28/2018 4:26:20 PM | C:\Sirius_T3\HCl18B27.t3r |
| Four-Plus S               | 0.9970 | 2/28/2018 4:26:20 PM | C:\Sirius_T3\HCl18B27.t3r |
| Four-Plus jH              | 0.8    | 2/28/2018 4:26:20 PM | C:\Sirius_T3\HCl18B27.t3r |
| Four-Plus jOH             | -0.4   | 2/28/2018 4:26:20 PM | C:\Sirius_T3\HCl18B27.t3r |
| Base concentration factor | 1.000  | 2/28/2018 4:26:20 PM | C:\Sirius_T3\KOH18B27.t3r |
| Acid concentration factor | 0.994  | 2/28/2018 4:26:20 PM | C:\Sirius_T3\HCl18B27.t3r |

## Instrument Settings

| Setting              | Value                      | Batch Id    | Install date           |
|----------------------|----------------------------|-------------|------------------------|
| Instrument owner     | Merck                      |             |                        |
| Instrument ID        | T312060                    |             |                        |
| Instrument type      | T3 Simulator               |             |                        |
| Software version     | 1.1.3.0                    |             |                        |
| Dispenser module     |                            | T3DM1200361 | 3/31/2009 5:24:52 AM   |
| Dispenser 0          | Water                      |             | 3/31/2009 5:25:05 AM   |
| Syringe volume       | 2.5 mL                     |             |                        |
| Firmware version     | 1.2.1(r2)                  |             |                        |
| Titrant              | Water (0.15 M KCl)         | 02-06-2018  | 2/27/2018 10:05:59 AM  |
| Dispenser 2          | Acid                       |             | 3/31/2009 5:25:11 AM   |
| Syringe volume       | 0.5 mL                     |             |                        |
| Firmware version     | 1.2.1(r2)                  |             |                        |
| Titrant              | Acid (0.5 M HCl)           | 02-27-2018  | 2/27/2018 10:27:22 AM  |
| Dispenser 1          | Base                       |             | 3/31/2009 5:25:21 AM   |
| Syringe volume       | 0.5 mL                     |             |                        |
| Firmware version     | 1.2.1(r2)                  |             |                        |
| Titrant              | Base (0.5 M KOH)           | 9/22/2017   | 2/27/2018 10:21:22 AM  |
| Dispenser 5          | Cosolvent                  |             | 3/31/2009 5:26:24 AM   |
| Syringe volume       | 2.5 mL                     |             |                        |
| Firmware version     | 1.2.1(r2)                  |             |                        |
| Distribution valve 5 | Distribution Valve         |             | 3/31/2009 5:28:19 AM   |
| Firmware version     | 1.1.3                      |             |                        |
| Port A               | Methanol (80%, 0.15 M KCl) | 09-26-17    | 2/7/2018 9:42:01 AM    |
| Port B               | Cyclohexane                | 11-01-17    | 2/27/2018 10:37:57 AM  |
| Dispenser 3          | Buffer                     |             | 8/3/2010 5:05:16 AM    |
| Syringe volume       | 0.5 mL                     |             |                        |
| Firmware version     | 1.2.1(r2)                  |             |                        |
| Titrant              | Dodecane                   | 2018/01/31  | 2/28/2018 10:18:04 AM  |
| Dispenser 6          | Octanol                    |             | 10/22/2010 10:52:43 AM |



Sample name: **M07\_octanol**  
 Assay name: **pH-metric high logP**  
 Assay ID: **18B-28011**  
 Filename: **C:\Sirius\_T3\Mehtap\20180228\_exp28\_logP\_T3-2\18B-28011\_M07\_octanol\_pH-metric high logP.t3r**

Experiment start time: **2/28/2018 4:26:20 PM**  
 Analyst: **Pion**  
 Instrument ID: **T312060**

## Instrument Settings (continued)

| Setting                                   | Value                      | Batch Id    | Install date           |
|-------------------------------------------|----------------------------|-------------|------------------------|
| Syringe volume                            | 0.5 mL                     |             |                        |
| Firmware version                          | 1.2.1(r2)                  |             |                        |
| Titration                                 | Octanol                    | 01-31-2018  | 2/27/2018 9:59:35 AM   |
| Titration                                 |                            | T3TM1200161 | 3/31/2009 5:24:17 AM   |
| Horizontal axis firmware version          | 1.17 AI1DI2DO2 Stepper 2   |             |                        |
| Vertical axis firmware version            | 1.17 AI1DI2DO2 Stepper 2   |             |                        |
| Chassis I/O firmware version              | 1.11 AI1DI0DO4 Norgren I/O |             |                        |
| Probe I/O firmware version                | 1.1.1                      |             |                        |
| Electrode                                 | T3 Electrode               | T3E0923     | 1/23/2018 2:01:00 PM   |
| E0 calibration                            | +3.96 mV                   |             | 2/28/2018 4:27:04 PM   |
| Filling solution                          | 3M KCl                     | KCL097      | 2/27/2018 9:49:43 AM   |
| Liquids                                   |                            |             |                        |
| Wash 1                                    | 50% IPA:50% Water          |             | 2/28/2018 10:23:32 AM  |
| Wash 2                                    | 0.5% Triton X-100 in H2O   |             | 2/28/2018 10:23:34 AM  |
| Buffer position 1                         | pH7 Wash                   |             | 2/28/2018 10:24:06 AM  |
| Buffer position 2                         | pH 7                       |             | 2/28/2018 10:24:08 AM  |
| Storage position                          |                            |             | 2/28/2018 10:21:14 AM  |
| Wash water                                | 8.8e+003 mL                | 02-27-2018  | 2/27/2018 9:54:39 AM   |
| Waste                                     | 6.7e+003 mL                |             | 11/28/2017 10:36:29 AM |
| Temperature controller                    |                            |             | 8/5/2010 6:35:13 AM    |
| Turbidity detector                        |                            |             | 3/31/2009 5:24:45 AM   |
| Spectrometer                              |                            | 074811      | 11/23/2010 11:22:28 AM |
| Dip probe                                 |                            | 10196       |                        |
| Wavelength coefficient A0                 | 183.333                    |             |                        |
| Wavelength coefficient A1                 | 2.21568                    |             |                        |
| Wavelength coefficient A2                 | -0.000289308               |             |                        |
| Total lamp lit time                       | 112:08:55                  |             | 11/23/2010 11:22:28 AM |
| Calibrated on                             | 2/27/2018 10:40:38 AM      |             |                        |
| Integration time                          | 40                         |             |                        |
| Scans averaged                            | 10                         |             |                        |
| Autoloader                                |                            | T3AL1200345 | 11/10/2015 9:34:13 AM  |
| Left-right axis firmware version          | 1.17 AI1DI2DO2 Stepper 2   |             |                        |
| Front-back axis firmware version          | 1.17 AI1DI2DO2 Stepper 2   |             |                        |
| Vertical axis firmware version            | 1.17 AI1DI2DO2 Stepper 2   |             |                        |
| Chassis I/O firmware version              | 1.11 AI1DI0DO4 Norgren I/O |             |                        |
| Configuration                             |                            |             |                        |
| Alternate titration position              | Titration position         |             |                        |
| Alternate reference position              | Reference position         |             |                        |
| Maximum standard vial volume              | 3.50 mL                    |             |                        |
| Maximum alternate vial volume             | 25.00 mL                   |             |                        |
| Automatic action idle period              | 5 minute(s)                |             |                        |
| Titration tube volume                     | 1.3 mL                     |             |                        |
| Syringe flush count                       | 3.50                       |             |                        |
| Flowing wash pump volume                  | 20.0 mL                    |             |                        |
| Flowing wash stir duration                | 5 s                        |             |                        |
| Flowing wash stir speed                   | 30%                        |             |                        |
| Solvent wash stir duration                | 5 s                        |             |                        |
| Solvent wash stir speed                   | 30%                        |             |                        |
| Surfactant wash stir duration             | 5 s                        |             |                        |
| Surfactant wash stir speed                | 30%                        |             |                        |
| E0 calibration minimum number of points   | 10                         |             |                        |
| E0 calibration maximum standard deviation | 0.01500                    |             |                        |
| E0 calibration timeout period             | 60 s                       |             |                        |
| E0 calibration stir duration              | 5 s                        |             |                        |
| E0 calibration preparation stir speed     | 30%                        |             |                        |
| E0 calibration buffer wash stir duration  | 5 s                        |             |                        |
| E0 calibration buffer wash stir speed     | 30%                        |             |                        |
| E0 calibration reading stir speed         | 0%                         |             |                        |

Sample name: **M07\_octanol** Experiment start time: **2/28/2018 4:26:20 PM**  
 Assay name: **pH-metric high logP** Analyst: **Pion**  
 Assay ID: **18B-28011** Instrument ID: **T312060**  
 Filename: **C:\Sirius\_T3\Mehtap\20180228\_exp28\_logP\_T3-2\18B-28011\_M07\_octanol\_pH-metric high logP.t3r**

## Instrument Settings (continued)

| Setting                                     | Value   | Batch Id | Install date |
|---------------------------------------------|---------|----------|--------------|
| Spectrometer calibration stir duration      | 5 s     |          |              |
| Spectrometer calibration stir speed         | 30%     |          |              |
| Spectrometer calibration wash pump volume   | 20.0 mL |          |              |
| Spectrometer calibration wash stir duration | 5 s     |          |              |
| Spectrometer calibration wash stir speed    | 30%     |          |              |
| Overhead dispense height                    | 10000   |          |              |

## Refinement Settings

| Setting                        | Value    | Default value |
|--------------------------------|----------|---------------|
| Turbidity detection method     | None     | None          |
| Turbidity wavelength to assess | 500.0 nm | 500.0 nm      |
| Turbidity maximum absorbance   | 0.100    | 0.100         |
| Turbidity probe threshold      | 50.00    | 50.00         |

## Experiment Log

[1:57] Air gap released for Acid (0.5 M HCl)  
 [1:57] Air gap released for Base (0.5 M KOH)  
 [2:33] Air gap created for Water (0.15 M KCl)  
 [2:33] Air gap created for Acid (0.5 M HCl)  
 [2:33] Air gap created for Base (0.5 M KOH)  
 [2:34] Air gap released for Water (0.15 M KCl)  
 [2:38] Titrator arm moved over Titration position  
 [2:38] Titration 1 of 3  
 [2:38] Adding initial titrants  
 [2:38] Automatically add 1.50000 mL of water  
 [3:03] Dispensed 1.500000 mL of Water (0.15 M KCl)  
 [3:07] Titrator arm moved over Drain  
 [8:49] Titrator arm moved to Titration position  
 [8:49] Argon flow rate set to 100  
 [8:49] Stirrer speed set to 10  
 [8:54] Automatically add 0.02000 mL of Octanol  
 [8:54] Dispensed 0.019991 mL of Octanol  
 [8:55] Initial pH = 6.32  
 [8:55] Iterative adjust 6.32 -> 2.00  
 [8:55] pH 6.32 -> 2.00  
 [8:57] Air gap released for Acid (0.5 M HCl)  
 [8:58] Dispensed 0.048871 mL of Acid (0.5 M HCl)  
 [9:03] Holding pH 2.00  
 [11:03] Stirrer speed set to 0  
 [11:03] Stirrer speed set to 50  
 [11:03] Iterative adjust 1.98 -> 2.00  
 [11:03] pH 1.98 -> 2.00  
 [11:04] Air gap released for Base (0.5 M KOH)  
 [11:04] Dispensed 0.002446 mL of Base (0.5 M KOH)  
 [11:55] Stirrer speed set to 0  
 [12:05] Datapoint id 1 collected  
 [12:05] Stirrer speed set to 50  
 [12:10] pH 2.02 -> 2.22  
 [12:10] Using cautious pH adjust  
 [12:10] Dispensed 0.007643 mL of Base (0.5 M KOH)  
 [12:15] Stepping pH = 2.11  
 [12:16] Dispensed 0.005339 mL of Base (0.5 M KOH)  
 [12:21] Stepping pH = 2.19  
 [12:21] Dispensed 0.001458 mL of Base (0.5 M KOH)  
 [12:26] Stepping pH = 2.22  
 [12:41] Stirrer speed set to 0  
 [12:52] Datapoint id 2 collected

Sample name: **M07\_octanol**  
Assay name: **pH-metric high logP**  
Assay ID: **18B-28011**  
Filename: **C:\Sirius\_T3\Mehtap\20180228\_exp28\_logP\_T3-2\18B-28011\_M07\_octanol\_pH-metric high logP.t3r**

Experiment start time: **2/28/2018 4:26:20 PM**  
Analyst: **Pion**  
Instrument ID: **T312060**

## Experiment Log (continued)

[12:52] Charge balance equation is out by 5.5%  
[12:52] Stirrer speed set to 50  
[12:57] pH 2.22 -> 2.42  
[12:57] Using charge balance adjust  
[12:57] Dispensed 0.009525 mL of Base (0.5 M KOH)  
[13:17] Stirrer speed set to 0  
[13:27] Datapoint id 3 collected  
[13:27] Charge balance equation is out by 6.0%  
[13:27] Stirrer speed set to 50  
[13:32] pH 2.44 -> 2.64  
[13:32] Using charge balance adjust  
[13:32] Dispensed 0.005738 mL of Base (0.5 M KOH)  
[13:53] Stirrer speed set to 0  
[14:03] Datapoint id 4 collected  
[14:03] Charge balance equation is out by 5.9%  
[14:03] Stirrer speed set to 50  
[14:08] pH 2.66 -> 2.86  
[14:08] Using charge balance adjust  
[14:08] Dispensed 0.003481 mL of Base (0.5 M KOH)  
[14:28] Stirrer speed set to 0  
[14:38] Datapoint id 5 collected  
[14:38] Charge balance equation is out by 14.5%  
[14:38] Stirrer speed set to 50  
[14:43] pH 2.89 -> 3.09  
[14:43] Using charge balance adjust  
[14:43] Dispensed 0.002070 mL of Base (0.5 M KOH)  
[15:04] Stirrer speed set to 0  
[15:14] Datapoint id 6 collected  
[15:14] Charge balance equation is out by -10.8%  
[15:14] Stirrer speed set to 50  
[15:19] pH 3.08 -> 3.28  
[15:19] Using charge balance adjust  
[15:19] Dispensed 0.001411 mL of Base (0.5 M KOH)  
[15:39] Stirrer speed set to 0  
[15:49] Datapoint id 7 collected  
[15:49] Charge balance equation is out by -9.7%  
[15:49] Stirrer speed set to 50  
[15:54] pH 3.26 -> 3.46  
[15:54] Using charge balance adjust  
[15:54] Dispensed 0.001011 mL of Base (0.5 M KOH)  
[16:14] Stirrer speed set to 0  
[16:24] Datapoint id 8 collected  
[16:24] Charge balance equation is out by -16.8%  
[16:24] Stirrer speed set to 50  
[16:29] pH 3.44 -> 3.64  
[16:29] Using cautious pH adjust  
[16:30] Dispensed 0.000400 mL of Base (0.5 M KOH)  
[16:35] Stepping pH = 3.50  
[16:35] Dispensed 0.000470 mL of Base (0.5 M KOH)  
[16:40] Stepping pH = 3.66  
[16:55] Stirrer speed set to 0  
[17:05] Datapoint id 9 collected  
[17:05] Charge balance equation is out by -8.3%  
[17:05] Stirrer speed set to 50  
[17:10] pH 3.67 -> 3.87  
[17:10] Using charge balance adjust  
[17:10] Dispensed 0.000682 mL of Base (0.5 M KOH)  
[17:30] Stirrer speed set to 0  
[17:41] Datapoint id 10 collected

Sample name: **M07\_octanol**  
Assay name: **pH-metric high logP**  
Assay ID: **18B-28011**  
Filename: **C:\Sirius\_T3\Mehtap\20180228\_exp28\_logP\_T3-2\18B-28011\_M07\_octanol\_pH-metric high logP.t3r**

Experiment start time: **2/28/2018 4:26:20 PM**  
Analyst: **Pion**  
Instrument ID: **T312060**

## Experiment Log (continued)

[17:41] Charge balance equation is out by 15.6%  
[17:41] Stirrer speed set to 50  
[17:46] pH 3.91 -> 4.11  
[17:46] Using cautious pH adjust  
[17:46] Dispensed 0.000353 mL of Base (0.5 M KOH)  
[17:51] Stepping pH = 4.02  
[17:51] Dispensed 0.000235 mL of Base (0.5 M KOH)  
[17:56] Stepping pH = 4.10  
[17:56] Dispensed 0.000047 mL of Base (0.5 M KOH)  
[18:01] Stepping pH = 4.11  
[18:16] Stirrer speed set to 0  
[18:26] Datapoint id 11 collected  
[18:26] Charge balance equation is out by 11.4%  
[18:26] Stirrer speed set to 50  
[18:31] pH 4.10 -> 4.30  
[18:31] Using charge balance adjust  
[18:32] Dispensed 0.000800 mL of Base (0.5 M KOH)  
[18:52] Stirrer speed set to 0  
[19:02] Datapoint id 12 collected  
[19:02] Charge balance equation is out by 29.2%  
[19:02] Stirrer speed set to 50  
[19:07] pH 4.36 -> 4.56  
[19:07] Using cautious pH adjust  
[19:07] Dispensed 0.000447 mL of Base (0.5 M KOH)  
[19:12] Stepping pH = 4.48  
[19:12] Dispensed 0.000259 mL of Base (0.5 M KOH)  
[19:17] Stepping pH = 4.55  
[19:17] Dispensed 0.000047 mL of Base (0.5 M KOH)  
[19:22] Stepping pH = 4.55  
[19:22] Dispensed 0.000259 mL of Base (0.5 M KOH)  
[19:28] Stepping pH = 4.62  
[19:43] Stirrer speed set to 0  
[19:54] Datapoint id 13 collected  
[19:54] Charge balance equation is out by -12.3%  
[19:54] Stirrer speed set to 50  
[19:59] pH 4.61 -> 4.81  
[19:59] Using charge balance adjust  
[19:59] Dispensed 0.000917 mL of Base (0.5 M KOH)  
[20:20] Stirrer speed set to 0  
[20:35] Datapoint id 14 collected  
[20:35] Charge balance equation is out by -8.1%  
[20:35] Stirrer speed set to 50  
[20:40] pH 4.81 -> 5.01  
[20:40] Using charge balance adjust  
[20:40] Dispensed 0.000847 mL of Base (0.5 M KOH)  
[21:00] Stirrer speed set to 0  
[21:13] Datapoint id 15 collected  
[21:13] Charge balance equation is out by -18.0%  
[21:13] Stirrer speed set to 50  
[21:18] pH 5.00 -> 5.20  
[21:18] Using cautious pH adjust  
[21:18] Dispensed 0.000353 mL of Base (0.5 M KOH)  
[21:23] Stepping pH = 5.07  
[21:23] Dispensed 0.000376 mL of Base (0.5 M KOH)  
[21:28] Stepping pH = 5.17  
[21:28] Dispensed 0.000071 mL of Base (0.5 M KOH)  
[21:33] Stepping pH = 5.14  
[21:33] Dispensed 0.000870 mL of Base (0.5 M KOH)  
[21:39] Stepping pH = 5.45

Sample name: **M07\_octanol**  
Assay name: **pH-metric high logP**  
Assay ID: **18B-28011**  
Filename: **C:\Sirius\_T3\Mehtap\20180228\_exp28\_logP\_T3-2\18B-28011\_M07\_octanol\_pH-metric high logP.t3r**

Experiment start time: **2/28/2018 4:26:20 PM**  
Analyst: **Pion**  
Instrument ID: **T312060**

## Experiment Log (continued)

[21:54] Stirrer speed set to 0  
[22:09] Datapoint id 16 collected  
[22:09] Charge balance equation is out by -134.1%  
[22:09] Stirrer speed set to 50  
[22:14] pH 5.41 -> 5.61  
[22:14] Using cautious pH adjust  
[22:14] Dispensed 0.000212 mL of Base (0.5 M KOH)  
[22:19] Stepping pH = 5.41  
[22:19] Dispensed 0.001035 mL of Base (0.5 M KOH)  
[22:24] Stepping pH = 6.09  
[22:39] Stirrer speed set to 0  
[23:05] Datapoint id 17 collected  
[23:05] Charge balance equation is out by -201.4%  
[23:05] Stirrer speed set to 50  
[23:10] pH 5.99 -> 6.19  
[23:10] Using cautious pH adjust  
[23:10] Dispensed 0.000071 mL of Base (0.5 M KOH)  
[23:15] Stepping pH = 5.99  
[23:15] Dispensed 0.000235 mL of Base (0.5 M KOH)  
[23:20] Stepping pH = 6.23  
[23:35] Stirrer speed set to 0  
[24:01] Datapoint id 18 collected  
[24:01] Charge balance equation is out by -98.3%  
[24:01] Stirrer speed set to 50  
[24:06] pH 6.26 -> 6.46  
[24:06] Using cautious pH adjust  
[24:06] Dispensed 0.000047 mL of Base (0.5 M KOH)  
[24:11] Stepping pH = 6.26  
[24:11] Dispensed 0.000165 mL of Base (0.5 M KOH)  
[24:16] Stepping pH = 6.37  
[24:16] Dispensed 0.000094 mL of Base (0.5 M KOH)  
[24:21] Stepping pH = 6.59  
[24:37] Stirrer speed set to 0  
[25:17] Datapoint id 19 collected  
[25:17] Charge balance equation is out by -178.7%  
[25:17] Stirrer speed set to 50  
[25:22] pH 6.71 -> 6.91  
[25:22] Using cautious pH adjust  
[25:22] Dispensed 0.000024 mL of Base (0.5 M KOH)  
[25:27] Stepping pH = 6.72  
[25:27] Dispensed 0.000071 mL of Base (0.5 M KOH)  
[25:32] Stepping pH = 6.75  
[25:32] Dispensed 0.000165 mL of Base (0.5 M KOH)  
[25:37] Stepping pH = 8.75  
[25:52] Stirrer speed set to 0  
[26:52] Datapoint id 20 collected  
[26:52] Charge balance equation is out by -408.8%  
[26:52] Stirrer speed set to 50  
[26:57] pH 8.97 -> 9.17  
[26:57] Using cautious pH adjust  
[26:57] Dispensed 0.000024 mL of Base (0.5 M KOH)  
[27:03] Stepping pH = 8.97  
[27:03] Dispensed 0.000094 mL of Base (0.5 M KOH)  
[27:08] Stepping pH = 8.98  
[27:08] Dispensed 0.000282 mL of Base (0.5 M KOH)  
[27:13] Stepping pH = 9.83  
[27:28] Stirrer speed set to 0  
[27:45] Datapoint id 21 collected  
[27:45] Charge balance equation is out by -942.4%

Sample name: **M07\_octanol**  
Assay name: **pH-metric high logP**  
Assay ID: **18B-28011**  
Filename: **C:\Sirius\_T3\Mehtap\20180228\_exp28\_logP\_T3-2\18B-28011\_M07\_octanol\_pH-metric high logP.t3r**

Experiment start time: **2/28/2018 4:26:20 PM**  
Analyst: **Pion**  
Instrument ID: **T312060**

## Experiment Log (continued)

[27:45] Stirrer speed set to 50  
[27:50] pH 9.85 -> 10.05  
[27:50] Using cautious pH adjust  
[27:50] Dispensed 0.000118 mL of Base (0.5 M KOH)  
[27:55] Stepping pH = 9.87  
[27:55] Dispensed 0.000259 mL of Base (0.5 M KOH)  
[28:00] Stepping pH = 10.13  
[28:15] Stirrer speed set to 0  
[28:34] Datapoint id 22 collected  
[28:34] Charge balance equation is out by -73.7%  
[28:34] Titration 2 of 3  
[28:34] Adding initial titrants  
[28:34] Automatically add 0.05000 mL of Octanol  
[28:35] Dispensed 0.050000 mL of Octanol  
[28:35] Stirrer speed set to 10  
[28:36] Stirrer speed set to 55  
[28:36] Iterative adjust 10.14 -> 2.00  
[28:36] pH 10.14 -> 2.00  
[28:37] Dispensed 0.052658 mL of Acid (0.5 M HCl)  
[28:42] pH 2.02 -> 2.00  
[28:43] Dispensed 0.001976 mL of Acid (0.5 M HCl)  
[29:33] Stirrer speed set to 0  
[29:43] Datapoint id 23 collected  
[29:43] Stirrer speed set to 55  
[29:48] pH 1.97 -> 2.17  
[29:48] Using cautious pH adjust  
[29:49] Dispensed 0.009196 mL of Base (0.5 M KOH)  
[29:54] Stepping pH = 2.06  
[29:54] Dispensed 0.006515 mL of Base (0.5 M KOH)  
[29:59] Stepping pH = 2.14  
[29:59] Dispensed 0.001505 mL of Base (0.5 M KOH)  
[30:04] Stepping pH = 2.16  
[30:20] Stirrer speed set to 0  
[30:30] Datapoint id 24 collected  
[30:30] Charge balance equation is out by 6.5%  
[30:30] Stirrer speed set to 55  
[30:35] pH 2.16 -> 2.36  
[30:35] Using charge balance adjust  
[30:36] Dispensed 0.011618 mL of Base (0.5 M KOH)  
[30:56] Stirrer speed set to 0  
[31:06] Datapoint id 25 collected  
[31:06] Charge balance equation is out by 20.5%  
[31:06] Stirrer speed set to 55  
[31:11] pH 2.41 -> 2.61  
[31:11] Using cautious pH adjust  
[31:11] Dispensed 0.003293 mL of Base (0.5 M KOH)  
[31:16] Stepping pH = 2.51  
[31:16] Dispensed 0.002023 mL of Base (0.5 M KOH)  
[31:21] Stepping pH = 2.58  
[31:21] Dispensed 0.000823 mL of Base (0.5 M KOH)  
[31:27] Stepping pH = 2.60  
[31:42] Stirrer speed set to 0  
[31:52] Datapoint id 26 collected  
[31:52] Charge balance equation is out by 6.8%  
[31:52] Stirrer speed set to 55  
[31:57] pH 2.61 -> 2.81  
[31:57] Using charge balance adjust  
[31:57] Dispensed 0.004257 mL of Base (0.5 M KOH)  
[32:17] Stirrer speed set to 0



Sample name: **M07\_octanol**  
Assay name: **pH-metric high logP**  
Assay ID: **18B-28011**  
Filename: **C:\Sirius\_T3\Mehtap\20180228\_exp28\_logP\_T3-2\18B-28011\_M07\_octanol\_pH-metric high logP.t3r**

Experiment start time: **2/28/2018 4:26:20 PM**  
Analyst: **Pion**  
Instrument ID: **T312060**

## Experiment Log (continued)

[32:27] Datapoint id 27 collected  
[32:27] Charge balance equation is out by 11.6%  
[32:27] Stirrer speed set to 55  
[32:32] pH 2.83 -> 3.03  
[32:32] Using charge balance adjust  
[32:32] Dispensed 0.002634 mL of Base (0.5 M KOH)  
[32:53] Stirrer speed set to 0  
[33:03] Datapoint id 28 collected  
[33:03] Charge balance equation is out by 26.9%  
[33:03] Stirrer speed set to 55  
[33:08] pH 3.09 -> 3.29  
[33:08] Using cautious pH adjust  
[33:08] Dispensed 0.000823 mL of Base (0.5 M KOH)  
[33:13] Stepping pH = 3.19  
[33:13] Dispensed 0.000588 mL of Base (0.5 M KOH)  
[33:18] Stepping pH = 3.27  
[33:18] Dispensed 0.000118 mL of Base (0.5 M KOH)  
[33:23] Stepping pH = 3.28  
[33:23] Dispensed 0.000094 mL of Base (0.5 M KOH)  
[33:28] Stepping pH = 3.30  
[33:44] Stirrer speed set to 0  
[33:54] Datapoint id 29 collected  
[33:54] Charge balance equation is out by 1.7%  
[33:54] Stirrer speed set to 55  
[33:59] pH 3.30 -> 3.50  
[33:59] Using charge balance adjust  
[33:59] Dispensed 0.001246 mL of Base (0.5 M KOH)  
[34:19] Stirrer speed set to 0  
[34:29] Datapoint id 30 collected  
[34:29] Charge balance equation is out by -0.4%  
[34:29] Stirrer speed set to 55  
[34:34] pH 3.51 -> 3.71  
[34:34] Using charge balance adjust  
[34:34] Dispensed 0.001105 mL of Base (0.5 M KOH)  
[34:54] Stirrer speed set to 0  
[35:05] Datapoint id 31 collected  
[35:05] Charge balance equation is out by 1.1%  
[35:05] Stirrer speed set to 55  
[35:10] pH 3.71 -> 3.91  
[35:10] Using charge balance adjust  
[35:10] Dispensed 0.001058 mL of Base (0.5 M KOH)  
[35:30] Stirrer speed set to 0  
[35:40] Datapoint id 32 collected  
[35:40] Charge balance equation is out by 2.5%  
[35:40] Stirrer speed set to 55  
[35:45] pH 3.92 -> 4.12  
[35:45] Using charge balance adjust  
[35:46] Dispensed 0.001058 mL of Base (0.5 M KOH)  
[36:06] Stirrer speed set to 0  
[36:16] Datapoint id 33 collected  
[36:16] Charge balance equation is out by 3.6%  
[36:16] Stirrer speed set to 55  
[36:21] pH 4.13 -> 4.33  
[36:21] Using charge balance adjust  
[36:21] Dispensed 0.001011 mL of Base (0.5 M KOH)  
[36:41] Stirrer speed set to 0  
[36:51] Datapoint id 34 collected  
[36:51] Charge balance equation is out by -3.3%  
[36:51] Stirrer speed set to 55

Sample name: **M07\_octanol**  
Assay name: **pH-metric high logP**  
Assay ID: **18B-28011**  
Filename: **C:\Sirius\_T3\Mehtap\20180228\_exp28\_logP\_T3-2\18B-28011\_M07\_octanol\_pH-metric high logP.t3r**

Experiment start time: **2/28/2018 4:26:20 PM**  
Analyst: **Pion**  
Instrument ID: **T312060**

## Experiment Log (continued)

[36:56] pH 4.34 -> 4.54  
[36:56] Using charge balance adjust  
[36:56] Dispensed 0.000894 mL of Base (0.5 M KOH)  
[37:17] Stirrer speed set to 0  
[37:27] Datapoint id 35 collected  
[37:27] Charge balance equation is out by -9.8%  
[37:27] Stirrer speed set to 55  
[37:32] pH 4.53 -> 4.73  
[37:32] Using charge balance adjust  
[37:32] Dispensed 0.000753 mL of Base (0.5 M KOH)  
[37:53] Stirrer speed set to 0  
[38:03] Datapoint id 36 collected  
[38:03] Charge balance equation is out by -11.7%  
[38:03] Stirrer speed set to 55  
[38:08] pH 4.72 -> 4.92  
[38:08] Using charge balance adjust  
[38:08] Dispensed 0.000588 mL of Base (0.5 M KOH)  
[38:29] Stirrer speed set to 0  
[38:39] Datapoint id 37 collected  
[38:39] Charge balance equation is out by -30.8%  
[38:39] Stirrer speed set to 55  
[38:44] pH 4.87 -> 5.07  
[38:44] Using cautious pH adjust  
[38:44] Dispensed 0.000235 mL of Base (0.5 M KOH)  
[38:49] Stepping pH = 4.93  
[38:49] Dispensed 0.000282 mL of Base (0.5 M KOH)  
[38:54] Stepping pH = 5.01  
[38:55] Dispensed 0.000141 mL of Base (0.5 M KOH)  
[39:00] Stepping pH = 5.05  
[39:00] Dispensed 0.000071 mL of Base (0.5 M KOH)  
[39:05] Stepping pH = 5.07  
[39:20] Stirrer speed set to 0  
[39:30] Datapoint id 38 collected  
[39:30] Charge balance equation is out by -55.1%  
[39:30] Stirrer speed set to 55  
[39:36] pH 5.09 -> 5.29  
[39:36] Using cautious pH adjust  
[39:36] Dispensed 0.000165 mL of Base (0.5 M KOH)  
[39:41] Stepping pH = 5.13  
[39:41] Dispensed 0.000282 mL of Base (0.5 M KOH)  
[39:46] Stepping pH = 5.28  
[39:46] Dispensed 0.000024 mL of Base (0.5 M KOH)  
[39:51] Stepping pH = 5.29  
[40:06] Stirrer speed set to 0  
[40:18] Datapoint id 39 collected  
[40:18] Charge balance equation is out by -46.4%  
[40:18] Stirrer speed set to 55  
[40:23] pH 5.30 -> 5.50  
[40:23] Using cautious pH adjust  
[40:23] Dispensed 0.000118 mL of Base (0.5 M KOH)  
[40:28] Stepping pH = 5.32  
[40:28] Dispensed 0.000282 mL of Base (0.5 M KOH)  
[40:33] Stepping pH = 5.58  
[40:48] Stirrer speed set to 0  
[41:00] Datapoint id 40 collected  
[41:00] Charge balance equation is out by -83.4%  
[41:00] Stirrer speed set to 55  
[41:05] pH 5.62 -> 5.82  
[41:05] Using cautious pH adjust



Sample name: **M07\_octanol**  
Assay name: **pH-metric high logP**  
Assay ID: **18B-28011**  
Filename: **C:\Sirius\_T3\Mehtap\20180228\_exp28\_logP\_T3-2\18B-28011\_M07\_octanol\_pH-metric high logP.t3r**

Experiment start time: **2/28/2018 4:26:20 PM**  
Analyst: **Pion**  
Instrument ID: **T312060**

## Experiment Log (continued)

[41:05] Dispensed 0.000071 mL of Base (0.5 M KOH)  
[41:11] Stepping pH = 5.63  
[41:11] Dispensed 0.000188 mL of Base (0.5 M KOH)  
[41:16] Stepping pH = 5.66  
[41:16] Dispensed 0.000376 mL of Base (0.5 M KOH)  
[41:21] Stepping pH = 6.69  
[41:36] Stirrer speed set to 0  
[42:36] Datapoint id 41 collected  
[42:36] Charge balance equation is out by -392.1%  
[42:36] Stirrer speed set to 55  
[42:41] pH 6.97 -> 7.17  
[42:41] Using cautious pH adjust  
[42:41] Dispensed 0.000024 mL of Base (0.5 M KOH)  
[42:46] Stepping pH = 7.02  
[42:46] Dispensed 0.000024 mL of Base (0.5 M KOH)  
[42:51] Stepping pH = 7.05  
[42:51] Dispensed 0.000024 mL of Base (0.5 M KOH)  
[42:56] Stepping pH = 7.08  
[42:56] Dispensed 0.000047 mL of Base (0.5 M KOH)  
[43:02] Stepping pH = 7.10  
[43:02] Dispensed 0.000047 mL of Base (0.5 M KOH)  
[43:07] Stepping pH = 7.10  
[43:07] Dispensed 0.000282 mL of Base (0.5 M KOH)  
[43:12] Stepping pH = 9.27  
[43:27] Stirrer speed set to 0  
[43:45] Datapoint id 42 collected  
[43:45] Charge balance equation is out by -1,782.6%  
[43:45] Stirrer speed set to 55  
[43:50] pH 9.30 -> 9.50  
[43:50] Using cautious pH adjust  
[43:50] Dispensed 0.000047 mL of Base (0.5 M KOH)  
[43:56] Stepping pH = 9.30  
[43:56] Dispensed 0.000212 mL of Base (0.5 M KOH)  
[44:01] Stepping pH = 9.60  
[44:16] Stirrer speed set to 0  
[44:37] Datapoint id 43 collected  
[44:37] Charge balance equation is out by -200.1%  
[44:37] Stirrer speed set to 55  
[44:42] pH 9.58 -> 9.78  
[44:42] Using cautious pH adjust  
[44:42] Dispensed 0.000071 mL of Base (0.5 M KOH)  
[44:47] Stepping pH = 9.58  
[44:47] Dispensed 0.000353 mL of Base (0.5 M KOH)  
[44:52] Stepping pH = 9.97  
[45:07] Stirrer speed set to 0  
[45:21] Datapoint id 44 collected  
[45:21] Charge balance equation is out by -201.1%  
[45:21] Stirrer speed set to 55  
[45:26] pH 9.95 -> 10.05  
[45:26] Using cautious pH adjust  
[45:26] Dispensed 0.000071 mL of Base (0.5 M KOH)  
[45:31] Stepping pH = 9.94  
[45:31] Dispensed 0.000329 mL of Base (0.5 M KOH)  
[45:36] Stepping pH = 10.17  
[45:51] Stirrer speed set to 0  
[46:01] Datapoint id 45 collected  
[46:01] Charge balance equation is out by -210.8%  
[46:01] Titration 3 of 3  
[46:01] Adding initial titrants

Sample name: **M07\_octanol**  
Assay name: **pH-metric high logP**  
Assay ID: **18B-28011**  
Filename: **C:\Sirius\_T3\Mehtap\20180228\_exp28\_logP\_T3-2\18B-28011\_M07\_octanol\_pH-metric high logP.t3r**

Experiment start time: **2/28/2018 4:26:20 PM**  
Analyst: **Pion**  
Instrument ID: **T312060**

## Experiment Log (continued)

[46:01] Automatically add 0.25000 mL of Octanol  
[46:07] Dispensed 0.250000 mL of Octanol  
[46:07] Stirrer speed set to 10  
[46:08] Stirrer speed set to 60  
[46:08] Iterative adjust 10.17 -> 2.00  
[46:08] pH 10.17 -> 2.00  
[46:10] Dispensed 0.055715 mL of Acid (0.5 M HCl)  
[46:15] pH 2.03 -> 2.00  
[46:15] Dispensed 0.003457 mL of Acid (0.5 M HCl)  
[47:05] Stirrer speed set to 0  
[47:15] Datapoint id 46 collected  
[47:15] Stirrer speed set to 60  
[47:20] pH 1.96 -> 2.16  
[47:20] Using cautious pH adjust  
[47:21] Dispensed 0.010113 mL of Base (0.5 M KOH)  
[47:26] Stepping pH = 2.02  
[47:26] Dispensed 0.010865 mL of Base (0.5 M KOH)  
[47:31] Stepping pH = 2.09  
[47:31] Dispensed 0.006515 mL of Base (0.5 M KOH)  
[47:36] Stepping pH = 2.18  
[47:51] Stirrer speed set to 0  
[48:01] Datapoint id 47 collected  
[48:01] Charge balance equation is out by -35.9%  
[48:01] Stirrer speed set to 60  
[48:06] pH 2.19 -> 2.39  
[48:06] Using cautious pH adjust  
[48:07] Dispensed 0.005903 mL of Base (0.5 M KOH)  
[48:12] Stepping pH = 2.29  
[48:12] Dispensed 0.003481 mL of Base (0.5 M KOH)  
[48:17] Stepping pH = 2.36  
[48:17] Dispensed 0.001435 mL of Base (0.5 M KOH)  
[48:22] Stepping pH = 2.39  
[48:37] Stirrer speed set to 0  
[48:47] Datapoint id 48 collected  
[48:47] Charge balance equation is out by 8.3%  
[48:47] Stirrer speed set to 60  
[48:52] pH 2.39 -> 2.59  
[48:52] Using charge balance adjust  
[48:53] Dispensed 0.007502 mL of Base (0.5 M KOH)  
[49:13] Stirrer speed set to 0  
[49:23] Datapoint id 49 collected  
[49:23] Charge balance equation is out by 9.3%  
[49:23] Stirrer speed set to 60  
[49:28] pH 2.62 -> 2.82  
[49:28] Using charge balance adjust  
[49:28] Dispensed 0.004657 mL of Base (0.5 M KOH)  
[49:48] Stirrer speed set to 0  
[49:59] Datapoint id 50 collected  
[49:59] Charge balance equation is out by 13.0%  
[49:59] Stirrer speed set to 60  
[50:04] pH 2.85 -> 3.05  
[50:04] Using charge balance adjust  
[50:04] Dispensed 0.002987 mL of Base (0.5 M KOH)  
[50:24] Stirrer speed set to 0  
[50:34] Datapoint id 51 collected  
[50:34] Charge balance equation is out by 15.0%  
[50:34] Stirrer speed set to 60  
[50:39] pH 3.08 -> 3.28  
[50:39] Using cautious pH adjust

Sample name: **M07\_octanol**  
Assay name: **pH-metric high logP**  
Assay ID: **18B-28011**  
Filename: **C:\Sirius\_T3\Mehtap\20180228\_exp28\_logP\_T3-2\18B-28011\_M07\_octanol\_pH-metric high logP.t3r**

Experiment start time: **2/28/2018 4:26:20 PM**  
Analyst: **Pion**  
Instrument ID: **T312060**

## Experiment Log (continued)

[50:39] Dispensed 0.001058 mL of Base (0.5 M KOH)  
[50:44] Stepping pH = 3.17  
[50:44] Dispensed 0.000823 mL of Base (0.5 M KOH)  
[50:50] Stepping pH = 3.24  
[50:50] Dispensed 0.000329 mL of Base (0.5 M KOH)  
[50:55] Stepping pH = 3.27  
[51:10] Stirrer speed set to 0  
[51:20] Datapoint id 52 collected  
[51:20] Charge balance equation is out by -4.5%  
[51:20] Stirrer speed set to 60  
[51:25] pH 3.28 -> 3.48  
[51:25] Using charge balance adjust  
[51:25] Dispensed 0.001717 mL of Base (0.5 M KOH)  
[51:45] Stirrer speed set to 0  
[51:55] Datapoint id 53 collected  
[51:55] Charge balance equation is out by -5.2%  
[51:55] Stirrer speed set to 60  
[52:00] pH 3.47 -> 3.67  
[52:00] Using charge balance adjust  
[52:00] Dispensed 0.001458 mL of Base (0.5 M KOH)  
[52:21] Stirrer speed set to 0  
[52:31] Datapoint id 54 collected  
[52:31] Charge balance equation is out by -0.7%  
[52:31] Stirrer speed set to 60  
[52:36] pH 3.68 -> 3.88  
[52:36] Using charge balance adjust  
[52:36] Dispensed 0.001246 mL of Base (0.5 M KOH)  
[52:56] Stirrer speed set to 0  
[53:06] Datapoint id 55 collected  
[53:06] Charge balance equation is out by 3.3%  
[53:06] Stirrer speed set to 60  
[53:11] pH 3.89 -> 4.09  
[53:11] Using charge balance adjust  
[53:11] Dispensed 0.001011 mL of Base (0.5 M KOH)  
[53:31] Stirrer speed set to 0  
[53:41] Datapoint id 56 collected  
[53:41] Charge balance equation is out by -1.8%  
[53:41] Stirrer speed set to 60  
[53:47] pH 4.10 -> 4.30  
[53:47] Using charge balance adjust  
[53:47] Dispensed 0.000800 mL of Base (0.5 M KOH)  
[54:07] Stirrer speed set to 0  
[54:17] Datapoint id 57 collected  
[54:17] Charge balance equation is out by -9.4%  
[54:17] Stirrer speed set to 60  
[54:22] pH 4.29 -> 4.49  
[54:22] Using charge balance adjust  
[54:22] Dispensed 0.000588 mL of Base (0.5 M KOH)  
[54:42] Stirrer speed set to 0  
[54:52] Datapoint id 58 collected  
[54:52] Charge balance equation is out by -20.0%  
[54:52] Stirrer speed set to 60  
[54:57] pH 4.45 -> 4.65  
[54:57] Using cautious pH adjust  
[54:57] Dispensed 0.000235 mL of Base (0.5 M KOH)  
[55:02] Stepping pH = 4.52  
[55:02] Dispensed 0.000235 mL of Base (0.5 M KOH)  
[55:08] Stepping pH = 4.61  
[55:08] Dispensed 0.000094 mL of Base (0.5 M KOH)

Sample name: **M07\_octanol**  
Assay name: **pH-metric high logP**  
Assay ID: **18B-28011**  
Filename: **C:\Sirius\_T3\Mehtap\20180228\_exp28\_logP\_T3-2\18B-28011\_M07\_octanol\_pH-metric high logP.t3r**

Experiment start time: **2/28/2018 4:26:20 PM**  
Analyst: **Pion**  
Instrument ID: **T312060**

## Experiment Log (continued)

[55:13] Stepping pH = 4.62  
[55:13] Dispensed 0.000118 mL of Base (0.5 M KOH)  
[55:18] Stepping pH = 4.67  
[55:33] Stirrer speed set to 0  
[55:43] Datapoint id 59 collected  
[55:43] Charge balance equation is out by -49.9%  
[55:43] Stirrer speed set to 60  
[55:49] pH 4.68 -> 4.88  
[55:49] Using cautious pH adjust  
[55:49] Dispensed 0.000141 mL of Base (0.5 M KOH)  
[55:54] Stepping pH = 4.75  
[55:54] Dispensed 0.000165 mL of Base (0.5 M KOH)  
[55:59] Stepping pH = 4.86  
[55:59] Dispensed 0.000024 mL of Base (0.5 M KOH)  
[56:04] Stepping pH = 4.86  
[56:04] Dispensed 0.000094 mL of Base (0.5 M KOH)  
[56:09] Stepping pH = 4.92  
[56:24] Stirrer speed set to 0  
[56:35] Datapoint id 60 collected  
[56:35] Charge balance equation is out by -46.6%  
[56:35] Stirrer speed set to 60  
[56:40] pH 4.93 -> 5.13  
[56:40] Using cautious pH adjust  
[56:40] Dispensed 0.000094 mL of Base (0.5 M KOH)  
[56:45] Stepping pH = 4.97  
[56:45] Dispensed 0.000165 mL of Base (0.5 M KOH)  
[56:50] Stepping pH = 5.15  
[57:05] Stirrer speed set to 0  
[57:16] Datapoint id 61 collected  
[57:16] Charge balance equation is out by -38.7%  
[57:16] Stirrer speed set to 60  
[57:21] pH 5.16 -> 5.36  
[57:21] Using cautious pH adjust  
[57:21] Dispensed 0.000047 mL of Base (0.5 M KOH)  
[57:27] Stepping pH = 5.17  
[57:27] Dispensed 0.000165 mL of Base (0.5 M KOH)  
[57:32] Stepping pH = 5.35  
[57:47] Stirrer speed set to 0  
[57:58] Datapoint id 62 collected  
[57:58] Charge balance equation is out by -87.8%  
[57:58] Stirrer speed set to 60  
[58:03] pH 5.38 -> 5.58  
[58:03] Using cautious pH adjust  
[58:03] Dispensed 0.000047 mL of Base (0.5 M KOH)  
[58:09] Stepping pH = 5.41  
[58:09] Dispensed 0.000094 mL of Base (0.5 M KOH)  
[58:14] Stepping pH = 5.54  
[58:14] Dispensed 0.000024 mL of Base (0.5 M KOH)  
[58:19] Stepping pH = 5.57  
[58:34] Stirrer speed set to 0  
[58:47] Datapoint id 63 collected  
[58:47] Charge balance equation is out by -84.7%  
[58:47] Stirrer speed set to 60  
[58:52] pH 5.63 -> 5.83  
[58:52] Using cautious pH adjust  
[58:52] Dispensed 0.000024 mL of Base (0.5 M KOH)  
[58:57] Stepping pH = 5.64  
[58:57] Dispensed 0.000094 mL of Base (0.5 M KOH)  
[59:02] Stepping pH = 5.74

Sample name: **M07\_octanol**  
Assay name: **pH-metric high logP**  
Assay ID: **18B-28011**  
Filename: **C:\Sirius\_T3\Mehtap\20180228\_exp28\_logP\_T3-2\18B-28011\_M07\_octanol\_pH-metric high logP.t3r**

Experiment start time: **2/28/2018 4:26:20 PM**  
Analyst: **Pion**  
Instrument ID: **T312060**

## Experiment Log (continued)

[59:02] Dispensed 0.000047 mL of Base (0.5 M KOH)  
[59:07] Stepping pH = 5.86  
[59:22] Stirrer speed set to 0  
[59:58] Datapoint id 64 collected  
[59:58] Charge balance equation is out by -167.1%  
[59:58] Stirrer speed set to 60  
[1:00:03] pH 5.99 -> 6.19  
[1:00:03] Using cautious pH adjust  
[1:00:03] Dispensed 0.000024 mL of Base (0.5 M KOH)  
[1:00:08] Stepping pH = 6.02  
[1:00:08] Dispensed 0.000047 mL of Base (0.5 M KOH)  
[1:00:13] Stepping pH = 6.15  
[1:00:13] Dispensed 0.000024 mL of Base (0.5 M KOH)  
[1:00:18] Stepping pH = 6.30  
[1:00:33] Stirrer speed set to 0  
[1:01:33] Datapoint id 65 collected  
[1:01:33] Charge balance equation is out by -96.8%  
[1:01:33] Stirrer speed set to 60  
[1:01:38] pH 6.35 -> 6.55  
[1:01:38] Using cautious pH adjust  
[1:01:38] Dispensed 0.000024 mL of Base (0.5 M KOH)  
[1:01:43] Stepping pH = 6.40  
[1:01:43] Dispensed 0.000047 mL of Base (0.5 M KOH)  
[1:01:48] Stepping pH = 6.63  
[1:02:04] Stirrer speed set to 0  
[1:03:04] Datapoint id 66 collected  
[1:03:04] Charge balance equation is out by -27.0%  
[1:03:04] Stirrer speed set to 60  
[1:03:09] pH 6.73 -> 6.93  
[1:03:09] Using cautious pH adjust  
[1:03:09] Dispensed 0.000024 mL of Base (0.5 M KOH)  
[1:03:14] Stepping pH = 6.79  
[1:03:14] Dispensed 0.000024 mL of Base (0.5 M KOH)  
[1:03:19] Stepping pH = 7.01  
[1:03:34] Stirrer speed set to 0  
[1:04:34] Datapoint id 67 collected  
[1:04:34] Charge balance equation is out by -13.9%  
[1:04:34] Stirrer speed set to 60  
[1:04:39] pH 7.04 -> 7.24  
[1:04:39] Using charge balance adjust  
[1:04:39] Dispensed 0.000024 mL of Base (0.5 M KOH)  
[1:04:59] Stirrer speed set to 0  
[1:05:59] Datapoint id 68 collected  
[1:05:59] Charge balance equation is out by -70.5%  
[1:05:59] Stirrer speed set to 60  
[1:06:05] pH 7.21 -> 7.41  
[1:06:05] Using cautious pH adjust  
[1:06:05] Dispensed 0.000024 mL of Base (0.5 M KOH)  
[1:06:10] Stepping pH = 7.21  
[1:06:10] Dispensed 0.000024 mL of Base (0.5 M KOH)  
[1:06:15] Stepping pH = 7.44  
[1:06:30] Stirrer speed set to 0  
[1:07:30] Datapoint id 69 collected  
[1:07:30] Charge balance equation is out by -155.1%  
[1:07:30] Stirrer speed set to 60  
[1:07:35] pH 7.73 -> 7.93  
[1:07:35] Using cautious pH adjust  
[1:07:35] Dispensed 0.000024 mL of Base (0.5 M KOH)  
[1:07:40] Stepping pH = 7.83

Sample name: **M07\_octanol**  
Assay name: **pH-metric high logP**  
Assay ID: **18B-28011**  
Filename: **C:\Sirius\_T3\Mehtap\20180228\_exp28\_logP\_T3-2\18B-28011\_M07\_octanol\_pH-metric high logP.t3r**

Experiment start time: **2/28/2018 4:26:20 PM**  
Analyst: **Pion**  
Instrument ID: **T312060**

## Experiment Log (continued)

[1:07:40] Dispensed 0.000024 mL of Base (0.5 M KOH)  
[1:07:45] Stepping pH = 8.04  
[1:08:00] Stirrer speed set to 0  
[1:09:00] Datapoint id 70 collected  
[1:09:00] Charge balance equation is out by -346.1%  
[1:09:00] Stirrer speed set to 60  
[1:09:06] pH 7.76 -> 7.96  
[1:09:06] Using cautious pH adjust  
[1:09:06] Dispensed 0.000024 mL of Base (0.5 M KOH)  
[1:09:11] Stepping pH = 7.79  
[1:09:11] Dispensed 0.000024 mL of Base (0.5 M KOH)  
[1:09:16] Stepping pH = 8.01  
[1:09:31] Stirrer speed set to 0  
[1:10:31] Datapoint id 71 collected  
[1:10:31] Charge balance equation is out by -354.4%  
[1:10:31] Stirrer speed set to 60  
[1:10:36] pH 8.11 -> 8.31  
[1:10:36] Using cautious pH adjust  
[1:10:36] Dispensed 0.000024 mL of Base (0.5 M KOH)  
[1:10:41] Stepping pH = 8.17  
[1:10:41] Dispensed 0.000024 mL of Base (0.5 M KOH)  
[1:10:46] Stepping pH = 8.19  
[1:10:46] Dispensed 0.000024 mL of Base (0.5 M KOH)  
[1:10:51] Stepping pH = 8.17  
[1:10:51] Dispensed 0.000094 mL of Base (0.5 M KOH)  
[1:10:57] Stepping pH = 8.47  
[1:11:12] Stirrer speed set to 0  
[1:12:12] Datapoint id 72 collected  
[1:12:12] Charge balance equation is out by -1,435.6%  
[1:12:12] Stirrer speed set to 60  
[1:12:17] pH 8.43 -> 8.63  
[1:12:17] Using cautious pH adjust  
[1:12:17] Dispensed 0.000024 mL of Base (0.5 M KOH)  
[1:12:22] Stepping pH = 8.42  
[1:12:22] Dispensed 0.000047 mL of Base (0.5 M KOH)  
[1:12:27] Stepping pH = 8.45  
[1:12:27] Dispensed 0.000094 mL of Base (0.5 M KOH)  
[1:12:32] Stepping pH = 8.81  
[1:12:47] Stirrer speed set to 0  
[1:13:08] Datapoint id 73 collected  
[1:13:08] Charge balance equation is out by -948.3%  
[1:13:08] Stirrer speed set to 60  
[1:13:13] pH 8.83 -> 9.03  
[1:13:13] Using cautious pH adjust  
[1:13:13] Dispensed 0.000024 mL of Base (0.5 M KOH)  
[1:13:18] Stepping pH = 8.84  
[1:13:18] Dispensed 0.000047 mL of Base (0.5 M KOH)  
[1:13:23] Stepping pH = 8.94  
[1:13:23] Dispensed 0.000024 mL of Base (0.5 M KOH)  
[1:13:28] Stepping pH = 9.00  
[1:13:28] Dispensed 0.000024 mL of Base (0.5 M KOH)  
[1:13:33] Stepping pH = 9.04  
[1:13:49] Stirrer speed set to 0  
[1:14:02] Datapoint id 74 collected  
[1:14:02] Charge balance equation is out by -262.5%  
[1:14:02] Stirrer speed set to 60  
[1:14:07] pH 9.05 -> 9.25  
[1:14:07] Using cautious pH adjust  
[1:14:07] Dispensed 0.000024 mL of Base (0.5 M KOH)



Sample name: **M07\_octanol**  
Assay name: **pH-metric high logP**  
Assay ID: **18B-28011**  
Filename: **C:\Sirius\_T3\Mehtap\20180228\_exp28\_logP\_T3-2\18B-28011\_M07\_octanol\_pH-metric high logP.t3r**

Experiment start time: **2/28/2018 4:26:20 PM**  
Analyst: **Pion**  
Instrument ID: **T312060**

## Experiment Log (continued)

[1:14:13] Stepping pH = 9.04  
[1:14:13] Dispensed 0.000141 mL of Base (0.5 M KOH)  
[1:14:18] Stepping pH = 9.33  
[1:14:33] Stirrer speed set to 0  
[1:14:50] Datapoint id 75 collected  
[1:14:50] Charge balance equation is out by -206.3%  
[1:14:50] Stirrer speed set to 60  
[1:14:55] pH 9.34 -> 9.54  
[1:14:55] Using cautious pH adjust  
[1:14:56] Dispensed 0.000047 mL of Base (0.5 M KOH)  
[1:15:01] Stepping pH = 9.37  
[1:15:01] Dispensed 0.000118 mL of Base (0.5 M KOH)  
[1:15:06] Stepping pH = 9.53  
[1:15:21] Stirrer speed set to 0  
[1:15:31] Datapoint id 76 collected  
[1:15:31] Charge balance equation is out by -78.6%  
[1:15:31] Stirrer speed set to 60  
[1:15:37] pH 9.54 -> 9.74  
[1:15:37] Using cautious pH adjust  
[1:15:37] Dispensed 0.000071 mL of Base (0.5 M KOH)  
[1:15:42] Stepping pH = 9.57  
[1:15:42] Dispensed 0.000141 mL of Base (0.5 M KOH)  
[1:15:47] Stepping pH = 9.72  
[1:15:47] Dispensed 0.000024 mL of Base (0.5 M KOH)  
[1:15:52] Stepping pH = 9.73  
[1:16:07] Stirrer speed set to 0  
[1:16:18] Datapoint id 77 collected  
[1:16:18] Charge balance equation is out by -62.5%  
[1:16:18] Stirrer speed set to 60  
[1:16:23] pH 9.73 -> 9.93  
[1:16:23] Using cautious pH adjust  
[1:16:23] Dispensed 0.000094 mL of Base (0.5 M KOH)  
[1:16:28] Stepping pH = 9.78  
[1:16:28] Dispensed 0.000165 mL of Base (0.5 M KOH)  
[1:16:33] Stepping pH = 9.93  
[1:16:48] Stirrer speed set to 0  
[1:16:59] Datapoint id 78 collected  
[1:16:59] Charge balance equation is out by -29.9%  
[1:16:59] Stirrer speed set to 60  
[1:17:04] pH 9.92 -> 10.05  
[1:17:04] Using cautious pH adjust  
[1:17:04] Dispensed 0.000094 mL of Base (0.5 M KOH)  
[1:17:09] Stepping pH = 9.95  
[1:17:09] Dispensed 0.000141 mL of Base (0.5 M KOH)  
[1:17:14] Stepping pH = 10.04  
[1:17:29] Stirrer speed set to 0  
[1:17:42] Datapoint id 79 collected  
[1:17:42] Charge balance equation is out by -36.7%  
[1:17:42] Argon flow rate set to 0  
[1:17:46] Titrator arm moved over Titration position
