# Supplementary material for: Octanol-water partition coefficient measurements for the SAMPL6 Blind Prediction Challenge
Source: bioRxiv or medRxiv preprint supplement (doi:10.1101/757393), 2019-12-02
Supplement: Supplementary file [file media-2.zip]

Sample name: **M18\_octanol**  
 Assay name: **pH-metric high logP**  
 Assay ID: **18C-09015**  
 Filename: **C:\Sirius\_T3\Mehtap\20180309\_exp31\_logP\_T3-2\18C-09015\_M18\_octanol\_pH-metric high logP.t3r**

Experiment start time: **3/9/2018 9:53:01 PM**  
 Analyst: **Pion**  
 Instrument ID: **T312060**

## pH-metric Result

logP (XH2 +) -0.73 ±0.56 (n=50)  
 logP (neutral XH) 2.59 ±0.01 (n=50)  
 logP (X -) 0.46  
 RMSD 1.511

## 18C-09015 Points 2 to 20

M18\_octanol concentration factor 1.192  
 Carbonate 0.0000 mM  
 Acidity error 0.28168 mM

## 18C-09015 Points 21 to 41

M18\_octanol concentration factor 1.079  
 Carbonate 0.1008 mM  
 Acidity error -0.00618 mM

## 18C-09015 Points 42 to 69

M18\_octanol concentration factor 1.146  
 Carbonate 0.1707 mM  
 Acidity error 0.14218 mM

## Warnings and errors

Errors None  
 Warnings None

## Sample logD and percent species

| pH     | M18_octanol<br>logD | M18_octanol<br>M18_octanolH2 | M18_octanol<br>M18_octanolH | M18_octanol<br>M18_octanol | M18_octanol<br>M18_octanolH2* | M18_octanol<br>M18_octanolH* | M18_octanol<br>M18_octanol* | Comment       |
|--------|---------------------|------------------------------|-----------------------------|----------------------------|-------------------------------|------------------------------|-----------------------------|---------------|
| 1.000  | -0.69               | 83.14 %                      | 0.00 %                      | 0.00 %                     | 15.49 %                       | 1.37 %                       | 0.00 %                      | Stomach<br>pH |
| 1.200  | -0.67               | 82.48 %                      | 0.01 %                      | 0.00 %                     | 15.36 %                       | 2.15 %                       | 0.00 %                      |               |
| 2.000  | -0.46               | 74.02 %                      | 0.03 %                      | 0.00 %                     | 13.79 %                       | 12.16 %                      | 0.00 %                      | Blood pH      |
| 3.000  | 0.26                | 35.30 %                      | 0.15 %                      | 0.00 %                     | 6.57 %                        | 57.98 %                      | 0.00 %                      |               |
| 4.000  | 1.20                | 5.66 %                       | 0.24 %                      | 0.00 %                     | 1.05 %                        | 93.04 %                      | 0.00 %                      |               |
| 5.000  | 2.06                | 0.60 %                       | 0.26 %                      | 0.00 %                     | 0.11 %                        | 99.03 %                      | 0.00 %                      |               |
| 6.000  | 2.49                | 0.06 %                       | 0.26 %                      | 0.00 %                     | 0.01 %                        | 99.67 %                      | 0.00 %                      |               |
| 6.500  | 2.55                | 0.02 %                       | 0.26 %                      | 0.00 %                     | 0.00 %                        | 99.72 %                      | 0.00 %                      |               |
| 7.000  | 2.58                | 0.01 %                       | 0.26 %                      | 0.00 %                     | 0.00 %                        | 99.73 %                      | 0.00 %                      |               |
| 7.400  | 2.58                | 0.00 %                       | 0.26 %                      | 0.00 %                     | 0.00 %                        | 99.74 %                      | 0.00 %                      |               |
| 8.000  | 2.58                | 0.00 %                       | 0.26 %                      | 0.00 %                     | 0.00 %                        | 99.74 %                      | 0.00 %                      |               |
| 9.000  | 2.58                | 0.00 %                       | 0.26 %                      | 0.01 %                     | 0.00 %                        | 99.72 %                      | 0.02 %                      |               |
| 10.000 | 2.50                | 0.00 %                       | 0.26 %                      | 0.06 %                     | 0.00 %                        | 99.52 %                      | 0.17 %                      |               |
| 11.000 | 2.08                | 0.00 %                       | 0.25 %                      | 0.57 %                     | 0.00 %                        | 97.54 %                      | 1.64 %                      |               |
| 12.000 | 1.28                | 0.00 %                       | 0.21 %                      | 4.73 %                     | 0.00 %                        | 81.41 %                      | 13.65 %                     |               |

Sample name: **M18\_octanol**  
 Assay name: **pH-metric high logP**  
 Assay ID: **18C-09015**  
 Filename: **C:\Sirius\_T3\Mehtap\20180309\_exp31\_logP\_T3-2\18C-09015\_M18\_octanol\_pH-metric high logP.t3r**

Experiment start time: **3/9/2018 9:53:01 PM**  
 Analyst: **Pion**  
 Instrument ID: **T312060**

## Graphs

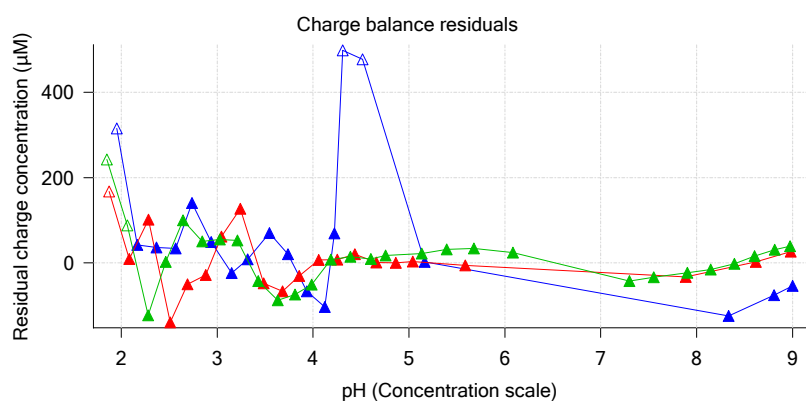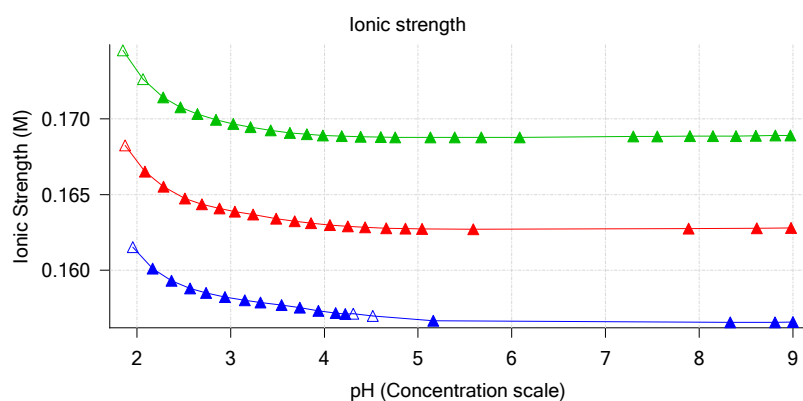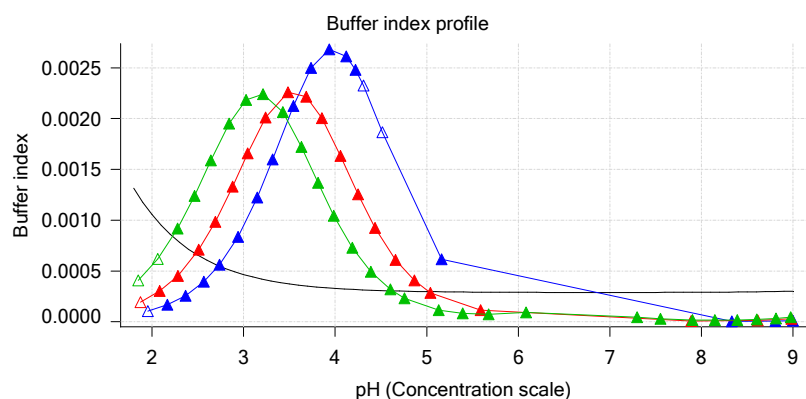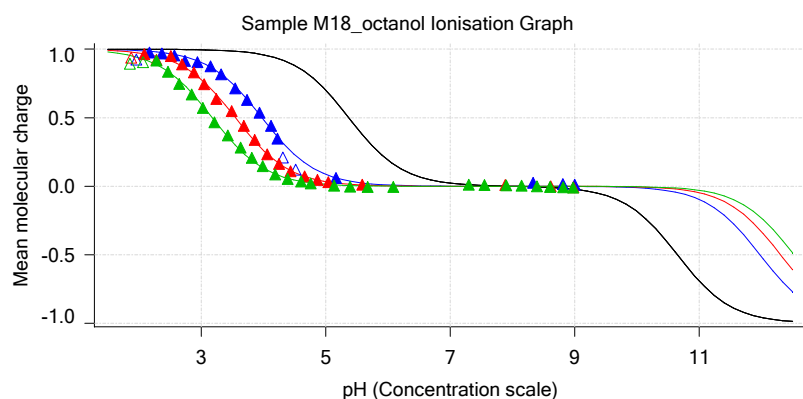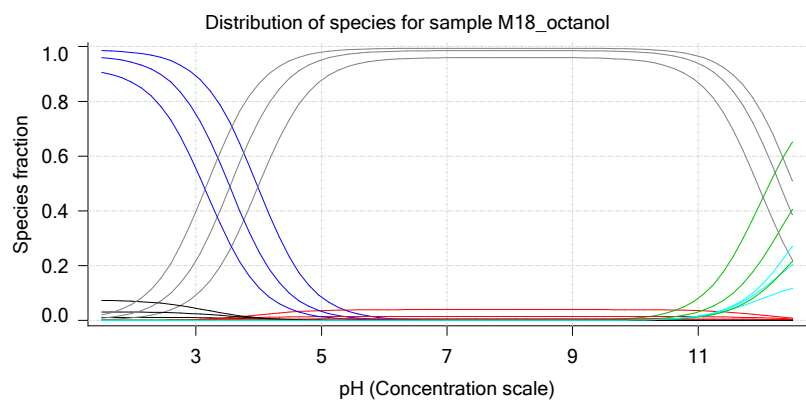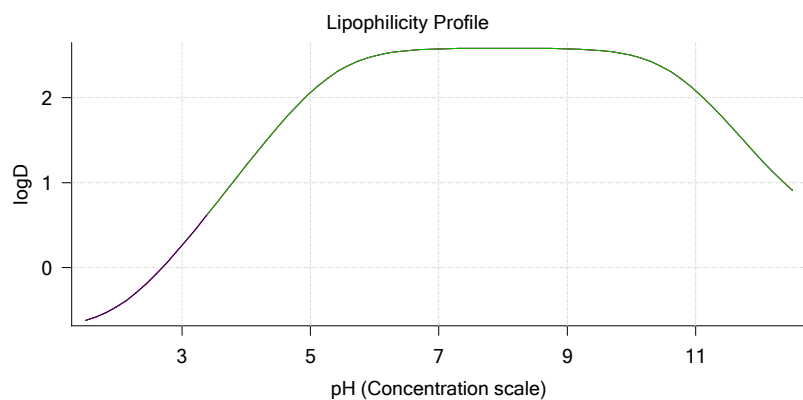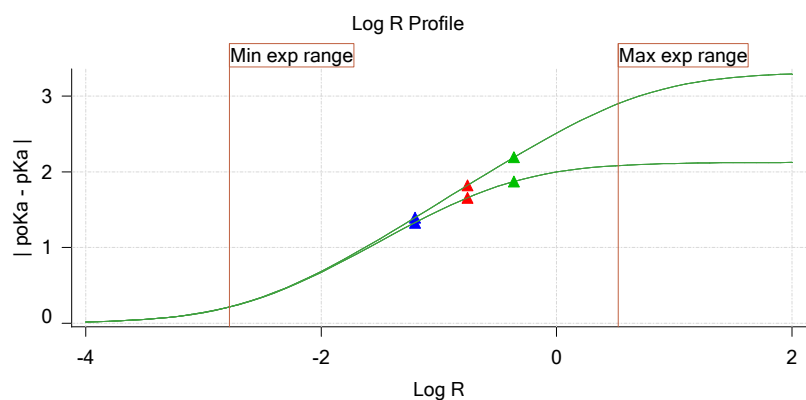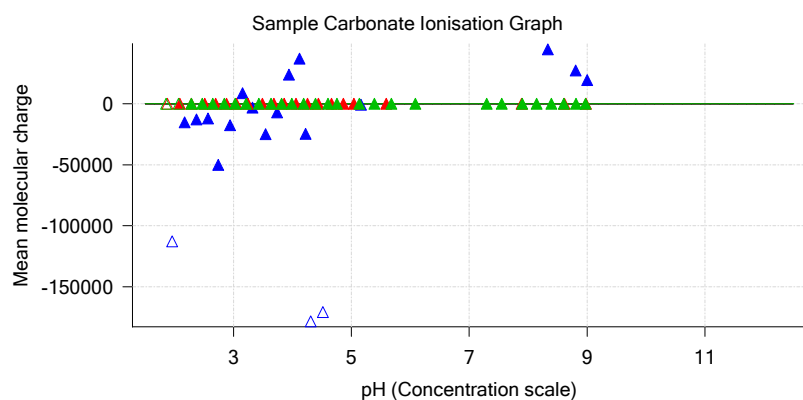

Sample name: **M18\_octanol**  
 Assay name: **pH-metric high logP**  
 Assay ID: **18C-09015**  
 Filename: **C:\Sirius\_T3\Mehtap\20180309\_exp31\_logP\_T3-2\18C-09015\_M18\_octanol\_pH-metric high logP.t3r**

Experiment start time: **3/9/2018 9:53:01 PM**  
 Analyst: **Pion**  
 Instrument ID: **T312060**

## Graphs (continued)

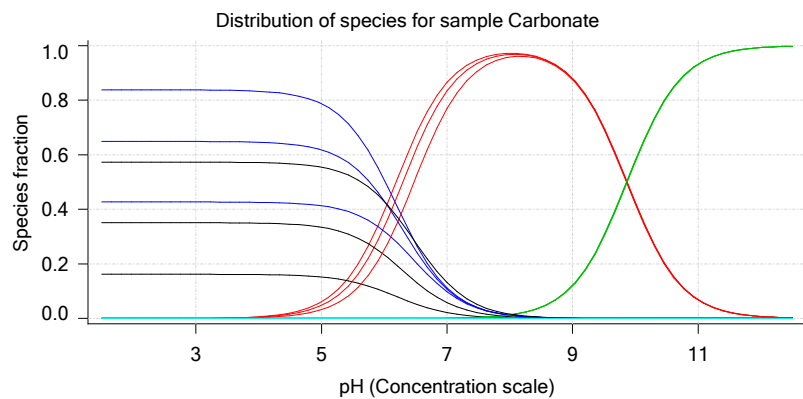

Sample name: **M18\_octanol**  
 Assay name: **pH-metric high logP**  
 Assay ID: **18C-09015**  
 Filename: **C:\Sirius\_T3\Mehtap\20180309\_exp31\_logP\_T3-2\18C-09015\_M18\_octanol\_pH-metric high logP.t3r**

Experiment start time: **3/9/2018 9:53:01 PM**  
 Analyst: **Pion**  
 Instrument ID: **T312060**

## pH-metric high logP Titration 1 of 3 18C-09015 Points 2 to 20

### Overall results

RMSD 2.905  
 Average ionic strength 0.158 M  
 Average temperature 24.9°C  
 Partition ratio 0.0626 : 1  
 Analyte concentration range 3669.6 µM to 3776.5 µM  
 Total points considered 16 of 19

### Warnings and errors

Errors None  
 Warnings One or more logP values out of range

### Four-Plus parameters

Alpha 0.102 3/9/2018 9:53:01 PM C:\Sirius\_T3\HCl18C09.t3r  
 S 0.9967 3/9/2018 9:53:01 PM C:\Sirius\_T3\HCl18C09.t3r  
 jH 1.2 3/9/2018 9:53:01 PM C:\Sirius\_T3\HCl18C09.t3r  
 jOH 0.0 3/9/2018 9:53:01 PM C:\Sirius\_T3\HCl18C09.t3r

### Titrants

0.50 M HCl 0.999843 3/9/2018 9:53:01 PM C:\Sirius\_T3\HCl18C09.t3r  
 0.50 M KOH 0.999845 3/9/2018 9:53:01 PM C:\Sirius\_T3\KOH18B27.t3r

### Sample

M18\_octanol concentration factor 1.192  
 Base pKa 1 5.37  
 Acid pKa 2 10.65  
 logP (XH<sub>2</sub><sup>+</sup>) -7.94  
 logP (neutral XH) 2.63  
 logP (X<sup>-</sup>) 0.46

### Sample graphs

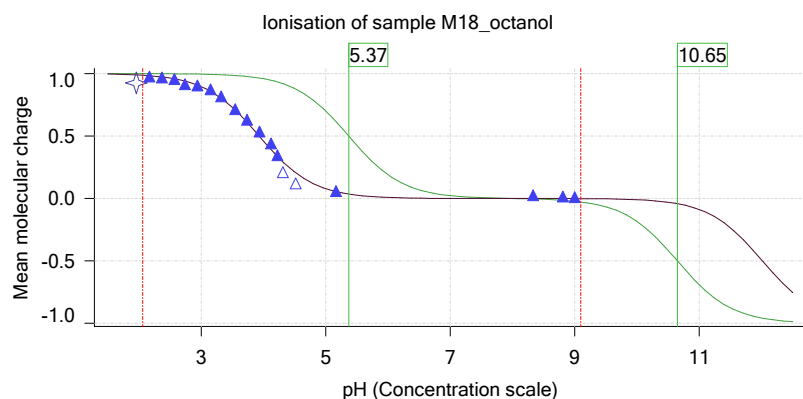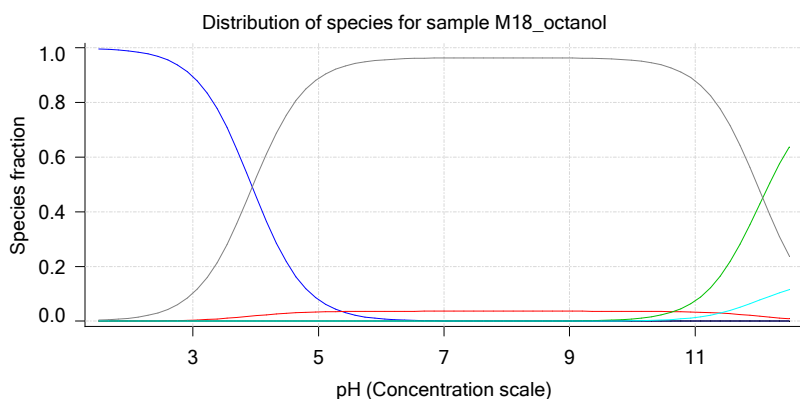

Sample name: **M18\_octanol**  
Assay name: **pH-metric high logP**  
Assay ID: **18C-09015**  
Filename: **C:\Sirius\_T3\Mehtap\20180309\_exp31\_logP\_T3-2\18C-09015\_M18\_octanol\_pH-metric high logP.t3r**

Experiment start time: **3/9/2018 9:53:01 PM**  
Analyst: **Pion**  
Instrument ID: **T312060**

## Sample graphs (continued)

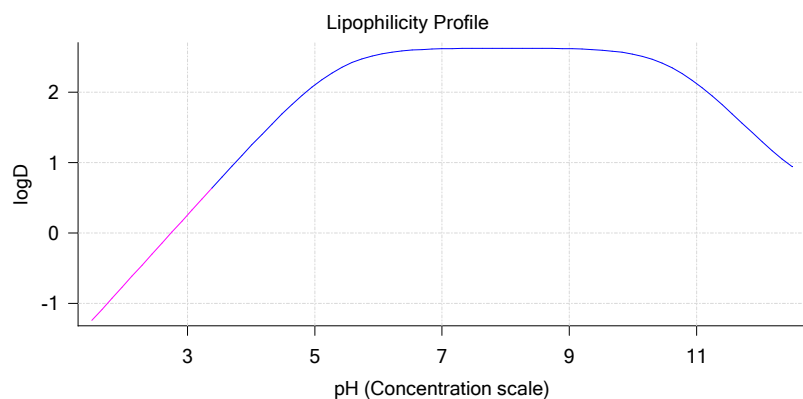

## Sample logD and percent species

| pH     | M18_octanol<br>logD | M18_octanol<br>M18_octanolH2 | M18_octanol<br>M18_octanolH | M18_octanol<br>M18_octanol | M18_octanol<br>M18_octanolH2* | M18_octanol<br>M18_octanolH* | M18_octanol<br>M18_octanol* | Comment       |
|--------|---------------------|------------------------------|-----------------------------|----------------------------|-------------------------------|------------------------------|-----------------------------|---------------|
| 1.000  | -1.74               | 99.88 %                      | 0.00 %                      | 0.00 %                     | 0.00 %                        | 0.11 %                       | 0.00 %                      | Stomach<br>pH |
| 1.200  | -1.54               | 99.81 %                      | 0.01 %                      | 0.00 %                     | 0.00 %                        | 0.18 %                       | 0.00 %                      |               |
| 2.000  | -0.74               | 98.84 %                      | 0.04 %                      | 0.00 %                     | 0.00 %                        | 1.12 %                       | 0.00 %                      |               |
| 3.000  | 0.26                | 89.50 %                      | 0.38 %                      | 0.00 %                     | 0.00 %                        | 10.12 %                      | 0.00 %                      | Blood pH      |
| 4.000  | 1.24                | 46.01 %                      | 1.96 %                      | 0.00 %                     | 0.00 %                        | 52.03 %                      | 0.00 %                      |               |
| 5.000  | 2.10                | 7.85 %                       | 3.35 %                      | 0.00 %                     | 0.00 %                        | 88.80 %                      | 0.00 %                      |               |
| 6.000  | 2.54                | 0.84 %                       | 3.60 %                      | 0.00 %                     | 0.00 %                        | 95.55 %                      | 0.00 %                      |               |
| 6.500  | 2.60                | 0.27 %                       | 3.63 %                      | 0.00 %                     | 0.00 %                        | 96.11 %                      | 0.00 %                      |               |
| 7.000  | 2.62                | 0.09 %                       | 3.63 %                      | 0.00 %                     | 0.00 %                        | 96.28 %                      | 0.00 %                      |               |
| 7.400  | 2.62                | 0.03 %                       | 3.63 %                      | 0.00 %                     | 0.00 %                        | 96.33 %                      | 0.00 %                      |               |
| 8.000  | 2.63                | 0.01 %                       | 3.63 %                      | 0.01 %                     | 0.00 %                        | 96.35 %                      | 0.00 %                      |               |
| 9.000  | 2.62                | 0.00 %                       | 3.63 %                      | 0.08 %                     | 0.00 %                        | 96.27 %                      | 0.01 %                      |               |
| 10.000 | 2.54                | 0.00 %                       | 3.60 %                      | 0.81 %                     | 0.00 %                        | 95.45 %                      | 0.15 %                      |               |
| 11.000 | 2.12                | 0.00 %                       | 3.32 %                      | 7.42 %                     | 0.00 %                        | 87.92 %                      | 1.34 %                      |               |
| 12.000 | 1.32                | 0.00 %                       | 1.85 %                      | 41.51 %                    | 0.00 %                        | 49.15 %                      | 7.49 %                      |               |

## Carbonate and acidity

Carbonate 0.000 mM  
Acidity error 0.282 mM

## Other graphs

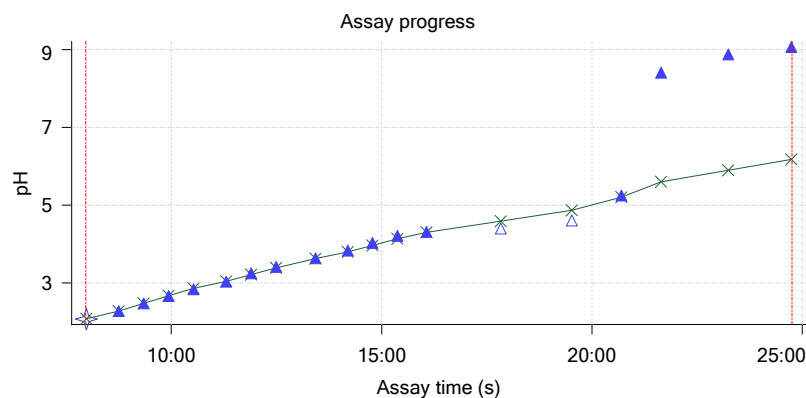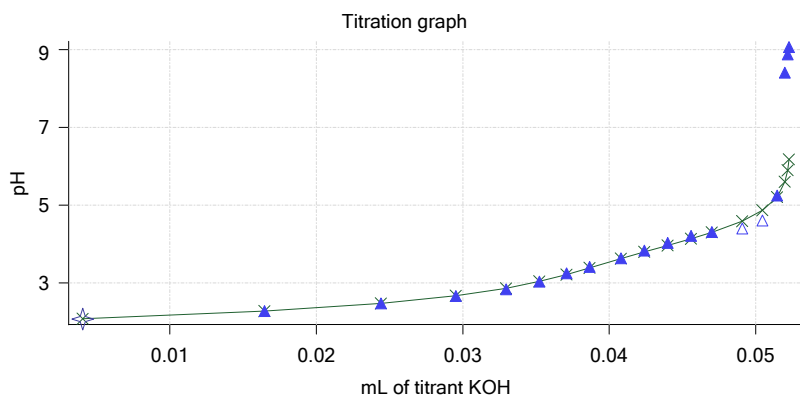

Sample name: **M18\_octanol**  
 Assay name: **pH-metric high logP**  
 Assay ID: **18C-09015**  
 Filename: **C:\Sirius\_T3\Mehtap\20180309\_exp31\_logP\_T3-2\18C-09015\_M18\_octanol\_pH-metric high logP.t3r**

Experiment start time: **3/9/2018 9:53:01 PM**  
 Analyst: **Pion**  
 Instrument ID: **T312060**

## Other graphs (continued)

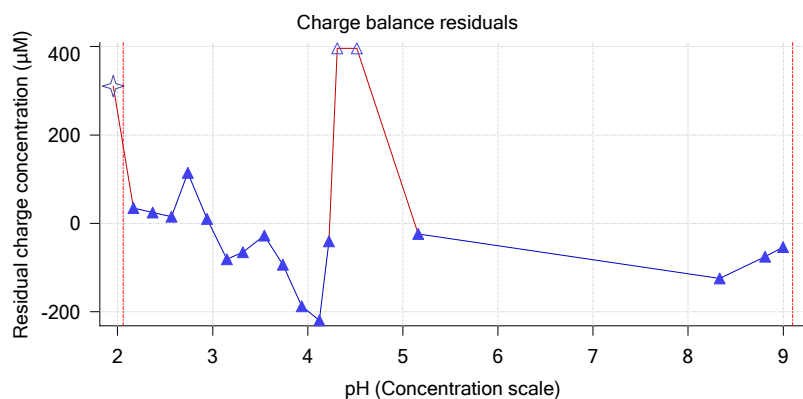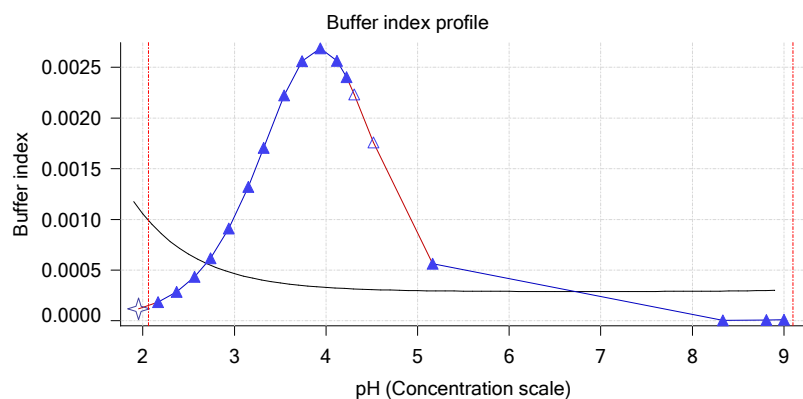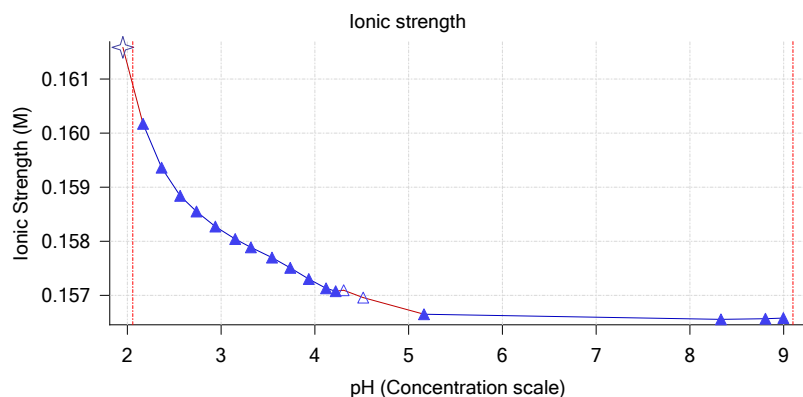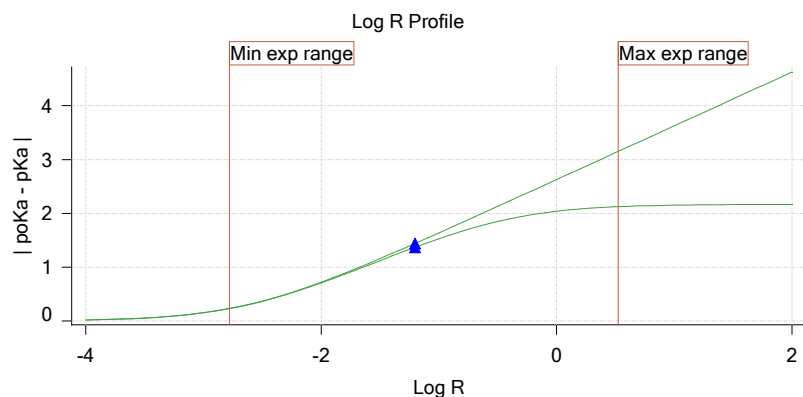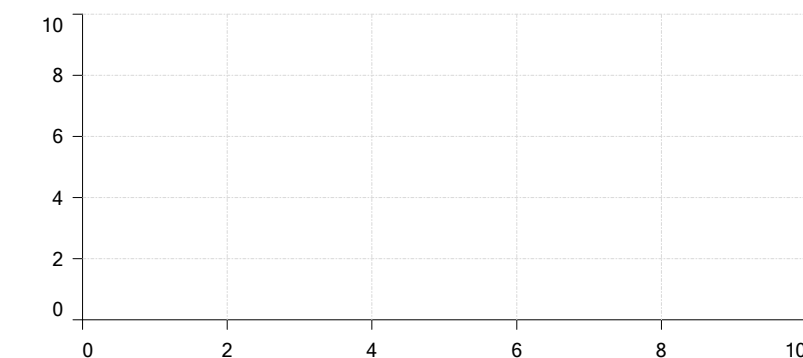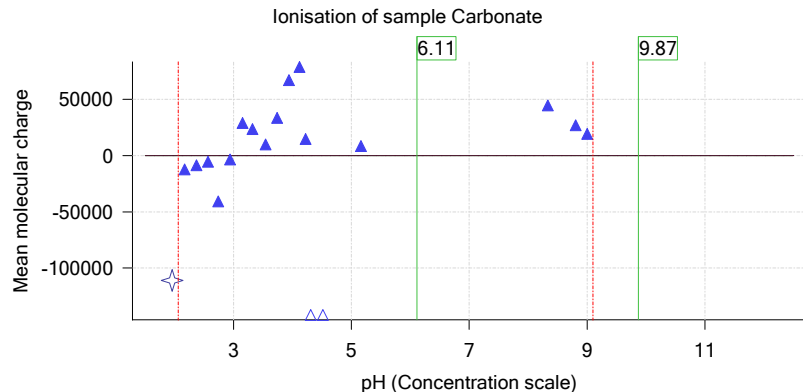

Sample name: **M18\_octanol**  
 Assay name: **pH-metric high logP**  
 Assay ID: **18C-09015**  
 Filename: **C:\Sirius\_T3\Mehtap\20180309\_exp31\_logP\_T3-2\18C-09015\_M18\_octanol\_pH-metric high logP.t3r**

Experiment start time: **3/9/2018 9:53:01 PM**  
 Analyst: **Pion**  
 Instrument ID: **T312060**

## pH-metric high logP Titration 2 of 3 18C-09015 Points 21 to 41

### Overall results

RMSD 0.624  
 Average ionic strength 0.164 M  
 Average temperature 25.0°C  
 Partition ratio 0.1752 : 1  
 Analyte concentration range 3095.9 µM to 3187.0 µM  
 Total points considered 20 of 21

### Warnings and errors

Errors None  
 Warnings One or more logP values out of range

### Four-Plus parameters

Alpha 0.102 3/9/2018 9:53:01 PM C:\Sirius\_T3\HCl18C09.t3r  
 S 0.9967 3/9/2018 9:53:01 PM C:\Sirius\_T3\HCl18C09.t3r  
 jH 1.2 3/9/2018 9:53:01 PM C:\Sirius\_T3\HCl18C09.t3r  
 jOH 0.0 3/9/2018 9:53:01 PM C:\Sirius\_T3\HCl18C09.t3r

### Titrants

0.50 M HCl 0.999843 3/9/2018 9:53:01 PM C:\Sirius\_T3\HCl18C09.t3r  
 0.50 M KOH 0.999845 3/9/2018 9:53:01 PM C:\Sirius\_T3\KOH18B27.t3r

### Sample

M18\_octanol concentration factor 1.079  
 Base pKa 1 5.37  
 Acid pKa 2 10.65  
 logP (XH<sub>2</sub><sup>+</sup>) -4.21  
 logP (neutral XH) 2.57  
 logP (X<sup>-</sup>) 0.46

### Sample graphs

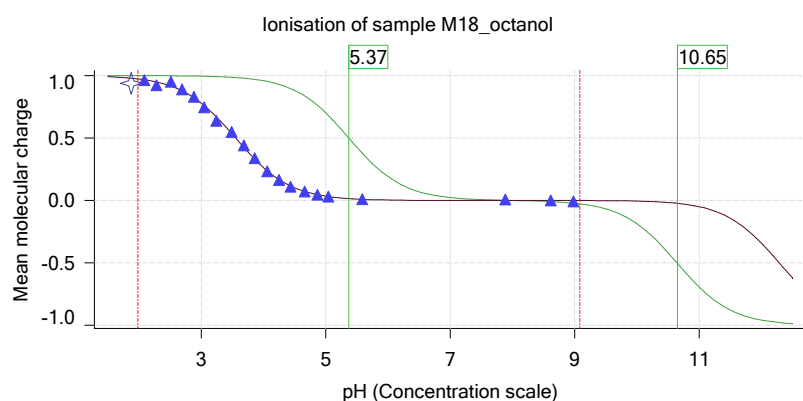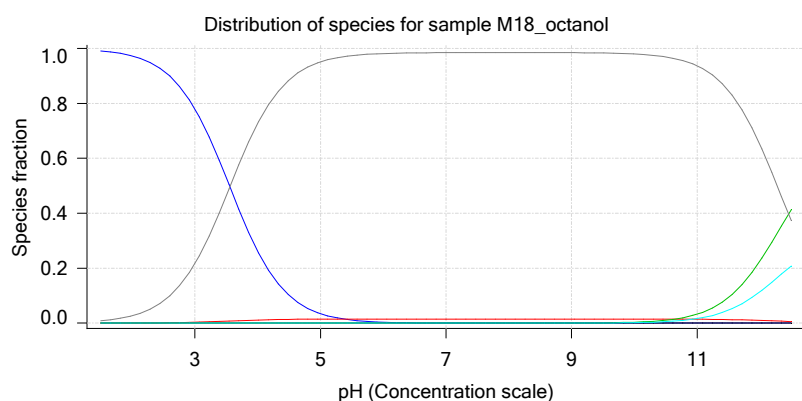

Sample name: **M18\_octanol**  
Assay name: **pH-metric high logP**  
Assay ID: **18C-09015**  
Filename: **C:\Sirius\_T3\Mehtap\20180309\_exp31\_logP\_T3-2\18C-09015\_M18\_octanol\_pH-metric high logP.t3r**

Experiment start time: **3/9/2018 9:53:01 PM**  
Analyst: **Pion**  
Instrument ID: **T312060**

## Sample graphs (continued)

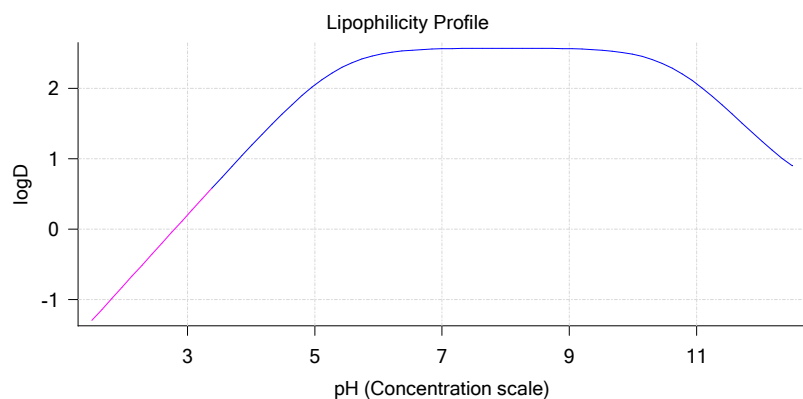

## Sample logD and percent species

| pH     | M18_octanol<br>logD | M18_octanol<br>M18_octanolH2 | M18_octanol<br>M18_octanolH | M18_octanol<br>M18_octanol | M18_octanol<br>M18_octanolH2* | M18_octanol<br>M18_octanolH* | M18_octanol<br>M18_octanol* | Comment       |
|--------|---------------------|------------------------------|-----------------------------|----------------------------|-------------------------------|------------------------------|-----------------------------|---------------|
| 1.000  | -1.80               | 99.72 %                      | 0.00 %                      | 0.00 %                     | 0.00 %                        | 0.28 %                       | 0.00 %                      | Stomach<br>pH |
| 1.200  | -1.60               | 99.55 %                      | 0.01 %                      | 0.00 %                     | 0.00 %                        | 0.44 %                       | 0.00 %                      |               |
| 2.000  | -0.80               | 97.25 %                      | 0.04 %                      | 0.00 %                     | 0.00 %                        | 2.71 %                       | 0.00 %                      |               |
| 3.000  | 0.20                | 77.96 %                      | 0.33 %                      | 0.00 %                     | 0.00 %                        | 21.70 %                      | 0.00 %                      |               |
| 4.000  | 1.18                | 26.13 %                      | 1.11 %                      | 0.00 %                     | 0.00 %                        | 72.75 %                      | 0.00 %                      | Blood pH      |
| 5.000  | 2.05                | 3.42 %                       | 1.46 %                      | 0.00 %                     | 0.00 %                        | 95.12 %                      | 0.00 %                      |               |
| 6.000  | 2.48                | 0.35 %                       | 1.50 %                      | 0.00 %                     | 0.00 %                        | 98.14 %                      | 0.00 %                      |               |
| 6.500  | 2.54                | 0.11 %                       | 1.51 %                      | 0.00 %                     | 0.00 %                        | 98.38 %                      | 0.00 %                      |               |
| 7.000  | 2.56                | 0.04 %                       | 1.51 %                      | 0.00 %                     | 0.00 %                        | 98.46 %                      | 0.00 %                      |               |
| 7.400  | 2.57                | 0.01 %                       | 1.51 %                      | 0.00 %                     | 0.00 %                        | 98.48 %                      | 0.00 %                      |               |
| 8.000  | 2.57                | 0.00 %                       | 1.51 %                      | 0.00 %                     | 0.00 %                        | 98.48 %                      | 0.00 %                      |               |
| 9.000  | 2.56                | 0.00 %                       | 1.51 %                      | 0.03 %                     | 0.00 %                        | 98.44 %                      | 0.02 %                      |               |
| 10.000 | 2.48                | 0.00 %                       | 1.50 %                      | 0.34 %                     | 0.00 %                        | 97.99 %                      | 0.17 %                      |               |
| 11.000 | 2.07                | 0.00 %                       | 1.44 %                      | 3.22 %                     | 0.00 %                        | 93.72 %                      | 1.62 %                      |               |
| 12.000 | 1.27                | 0.00 %                       | 1.00 %                      | 22.40 %                    | 0.00 %                        | 65.29 %                      | 11.31 %                     |               |

## Carbonate and acidity

Carbonate 0.101 mM  
Acidity error -0.006 mM

## Other graphs

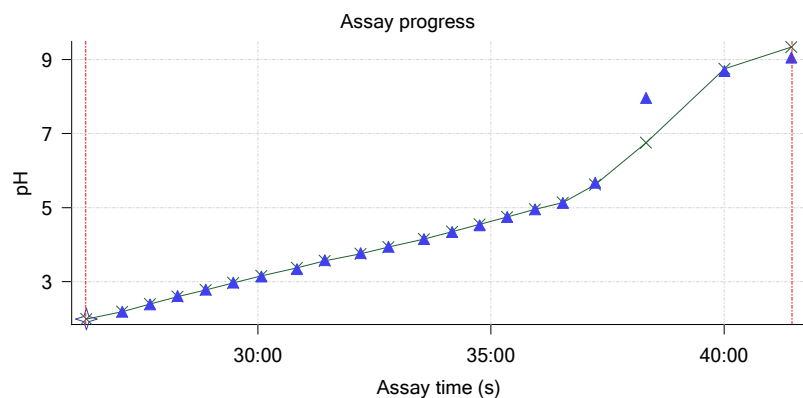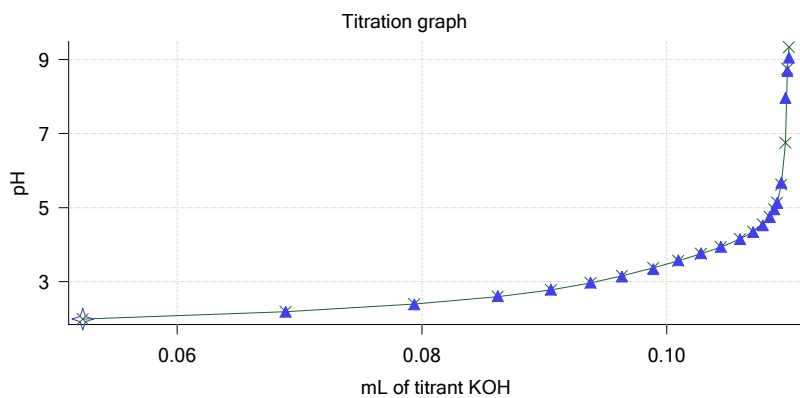



Sample name: **M18\_octanol**  
 Assay name: **pH-metric high logP**  
 Assay ID: **18C-09015**  
 Filename: **C:\Sirius\_T3\Mehtap\20180309\_exp31\_logP\_T3-2\18C-09015\_M18\_octanol\_pH-metric high logP.t3r**

Experiment start time: **3/9/2018 9:53:01 PM**  
 Analyst: **Pion**  
 Instrument ID: **T312060**

## Other graphs (continued)

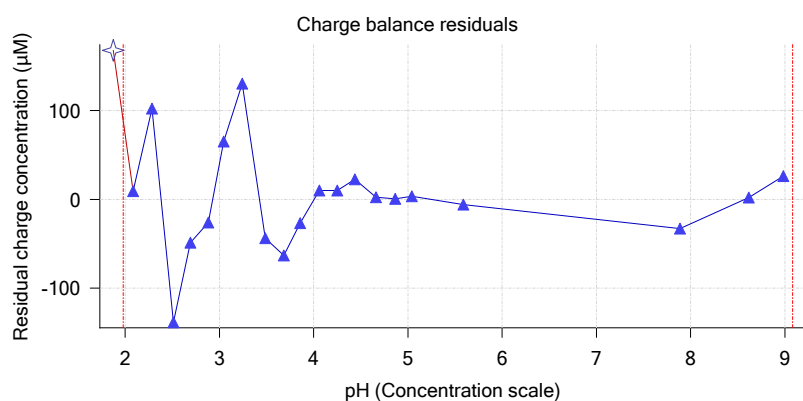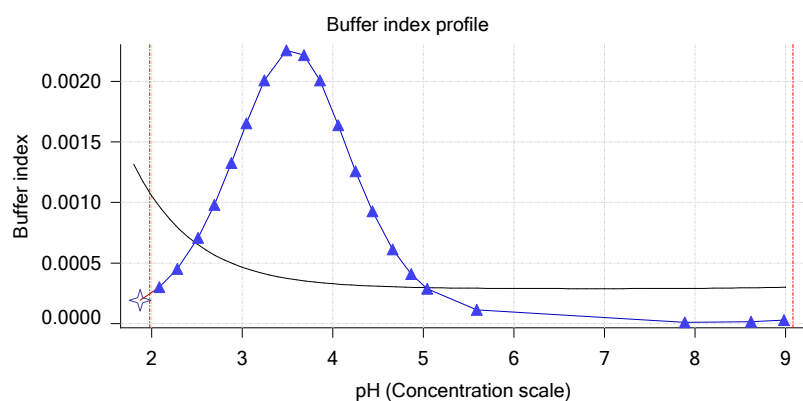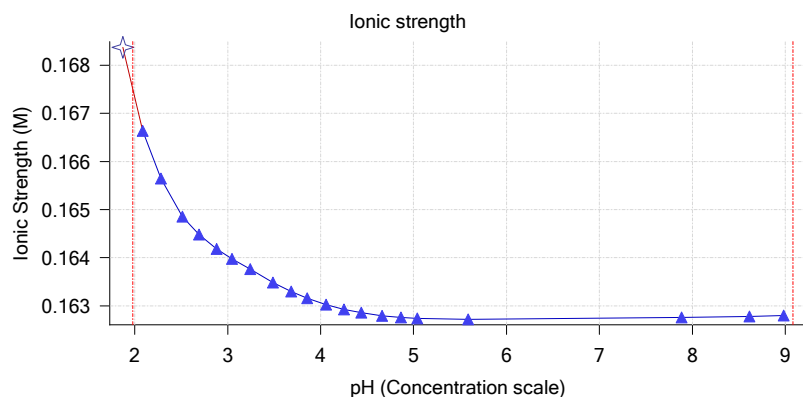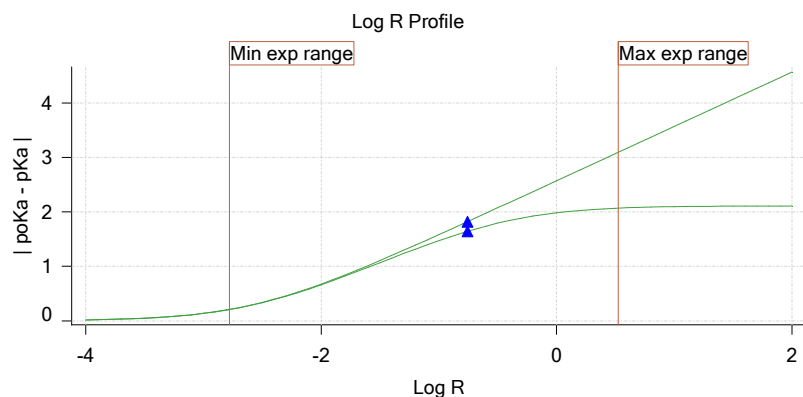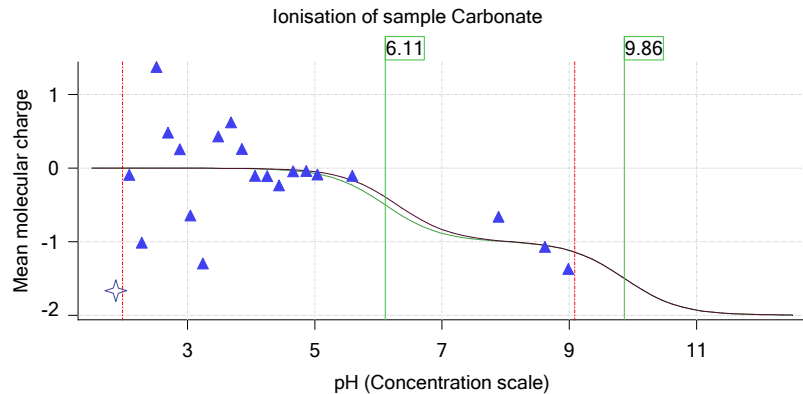

Sample name: **M18\_octanol**  
 Assay name: **pH-metric high logP**  
 Assay ID: **18C-09015**  
 Filename: **C:\Sirius\_T3\Mehtap\20180309\_exp31\_logP\_T3-2\18C-09015\_M18\_octanol\_pH-metric high logP.t3r**

Experiment start time: **3/9/2018 9:53:01 PM**  
 Analyst: **Pion**  
 Instrument ID: **T312060**

pH-metric high logP Titration 3 of 3 18C-09015 Points 42 to 69

## Overall results

RMSD 0.425  
 Average ionic strength 0.169 M  
 Average temperature 25.0°C  
 Partition ratio 0.4343 : 1  
 Analyte concentration range 2362.4 µM to 2420.9 µM  
 Total points considered 26 of 28

## Warnings and errors

Errors None  
 Warnings One or more logP values out of range

## Four-Plus parameters

Alpha 0.102 3/9/2018 9:53:01 PM C:\Sirius\_T3\HCl18C09.t3r  
 S 0.9967 3/9/2018 9:53:01 PM C:\Sirius\_T3\HCl18C09.t3r  
 jH 1.2 3/9/2018 9:53:01 PM C:\Sirius\_T3\HCl18C09.t3r  
 jOH 0.0 3/9/2018 9:53:01 PM C:\Sirius\_T3\HCl18C09.t3r

## Titrants

0.50 M HCl 0.999843 3/9/2018 9:53:01 PM C:\Sirius\_T3\HCl18C09.t3r  
 0.50 M KOH 0.999845 3/9/2018 9:53:01 PM C:\Sirius\_T3\KOH18B27.t3r

## Sample

M18\_octanol concentration factor 1.146  
 Base pKa 1 5.37  
 Acid pKa 2 10.65  
 logP (XH<sub>2</sub><sup>+</sup>) -3.41  
 logP (neutral XH) 2.55  
 logP (X<sup>-</sup>) 0.46

## Sample graphs

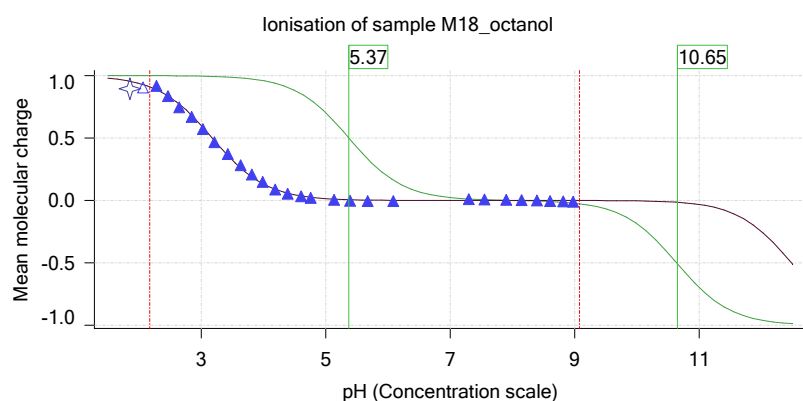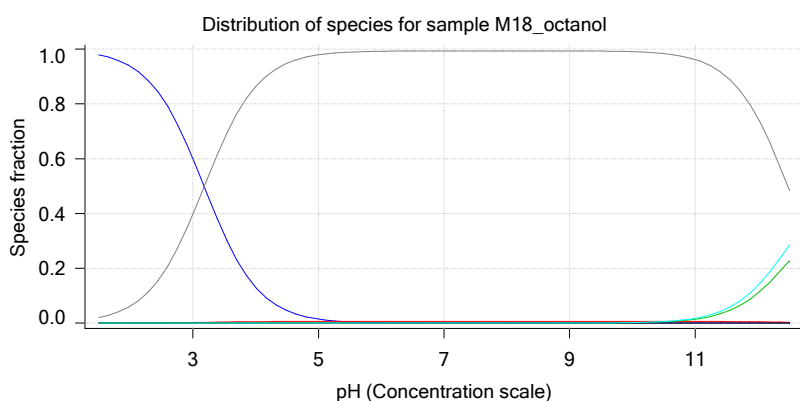

Sample name: **M18\_octanol**  
Assay name: **pH-metric high logP**  
Assay ID: **18C-09015**  
Filename: **C:\Sirius\_T3\Mehtap\20180309\_exp31\_logP\_T3-2\18C-09015\_M18\_octanol\_pH-metric high logP.t3r**

Experiment start time: **3/9/2018 9:53:01 PM**  
Analyst: **Pion**  
Instrument ID: **T312060**

## Sample graphs (continued)

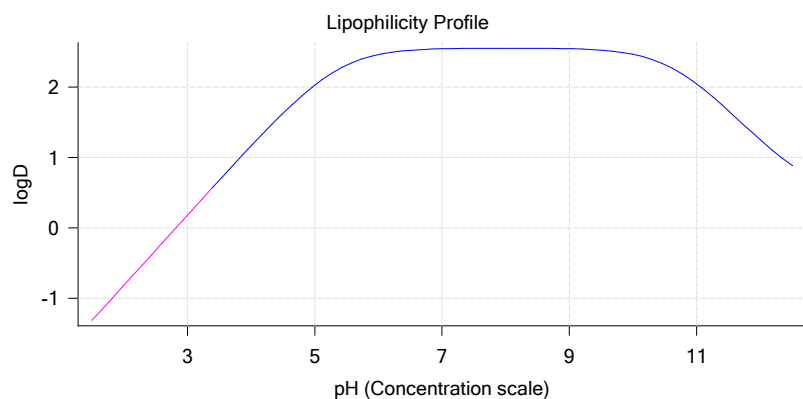

## Sample logD and percent species

| pH     | M18_octanol<br>logD | M18_octanol<br>M18_octanolH2 | M18_octanol<br>M18_octanolH | M18_octanol<br>M18_octanol | M18_octanol<br>M18_octanolH2* | M18_octanol<br>M18_octanolH* | M18_octanol<br>M18_octanol* | Comment       |
|--------|---------------------|------------------------------|-----------------------------|----------------------------|-------------------------------|------------------------------|-----------------------------|---------------|
| 1.000  | -1.80               | 99.32 %                      | 0.00 %                      | 0.00 %                     | 0.02 %                        | 0.66 %                       | 0.00 %                      | Stomach<br>pH |
| 1.200  | -1.61               | 98.94 %                      | 0.01 %                      | 0.00 %                     | 0.02 %                        | 1.04 %                       | 0.00 %                      |               |
| 2.000  | -0.81               | 93.72 %                      | 0.04 %                      | 0.00 %                     | 0.02 %                        | 6.22 %                       | 0.00 %                      |               |
| 3.000  | 0.18                | 59.93 %                      | 0.26 %                      | 0.00 %                     | 0.01 %                        | 39.80 %                      | 0.00 %                      |               |
| 4.000  | 1.17                | 13.02 %                      | 0.56 %                      | 0.00 %                     | 0.00 %                        | 86.43 %                      | 0.00 %                      | Blood pH      |
| 5.000  | 2.03                | 1.47 %                       | 0.63 %                      | 0.00 %                     | 0.00 %                        | 97.90 %                      | 0.00 %                      |               |
| 6.000  | 2.46                | 0.15 %                       | 0.64 %                      | 0.00 %                     | 0.00 %                        | 99.21 %                      | 0.00 %                      |               |
| 6.500  | 2.52                | 0.05 %                       | 0.64 %                      | 0.00 %                     | 0.00 %                        | 99.31 %                      | 0.00 %                      |               |
| 7.000  | 2.54                | 0.01 %                       | 0.64 %                      | 0.00 %                     | 0.00 %                        | 99.35 %                      | 0.00 %                      |               |
| 7.400  | 2.55                | 0.01 %                       | 0.64 %                      | 0.00 %                     | 0.00 %                        | 99.35 %                      | 0.00 %                      |               |
| 8.000  | 2.55                | 0.00 %                       | 0.64 %                      | 0.00 %                     | 0.00 %                        | 99.36 %                      | 0.00 %                      |               |
| 9.000  | 2.54                | 0.00 %                       | 0.64 %                      | 0.01 %                     | 0.00 %                        | 99.33 %                      | 0.02 %                      |               |
| 10.000 | 2.47                | 0.00 %                       | 0.64 %                      | 0.14 %                     | 0.00 %                        | 99.04 %                      | 0.18 %                      |               |
| 11.000 | 2.05                | 0.00 %                       | 0.62 %                      | 1.38 %                     | 0.00 %                        | 96.26 %                      | 1.73 %                      |               |
| 12.000 | 1.26                | 0.00 %                       | 0.48 %                      | 10.81 %                    | 0.00 %                        | 75.17 %                      | 13.54 %                     |               |

## Carbonate and acidity

Carbonate 0.171 mM  
Acidity error 0.142 mM

## Other graphs

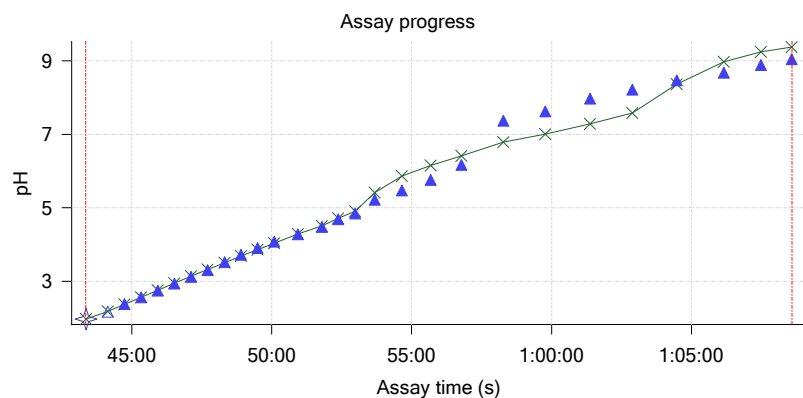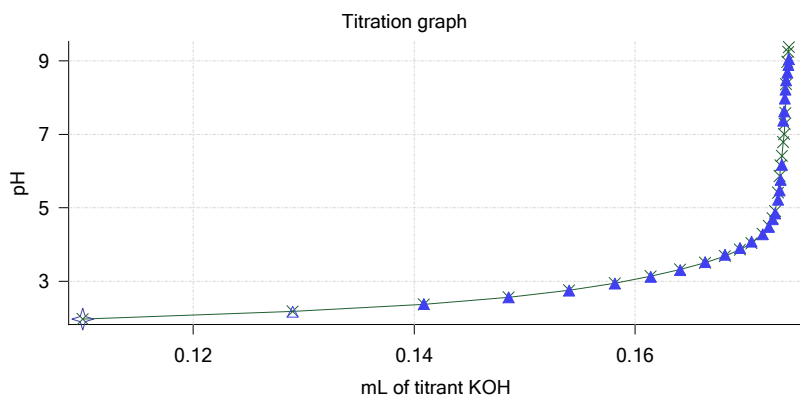

Sample name: **M18\_octanol**  
 Assay name: **pH-metric high logP**  
 Assay ID: **18C-09015**  
 Filename: **C:\Sirius\_T3\Mehtap\20180309\_exp31\_logP\_T3-2\18C-09015\_M18\_octanol\_pH-metric high logP.t3r**

Experiment start time: **3/9/2018 9:53:01 PM**  
 Analyst: **Pion**  
 Instrument ID: **T312060**

## Other graphs (continued)

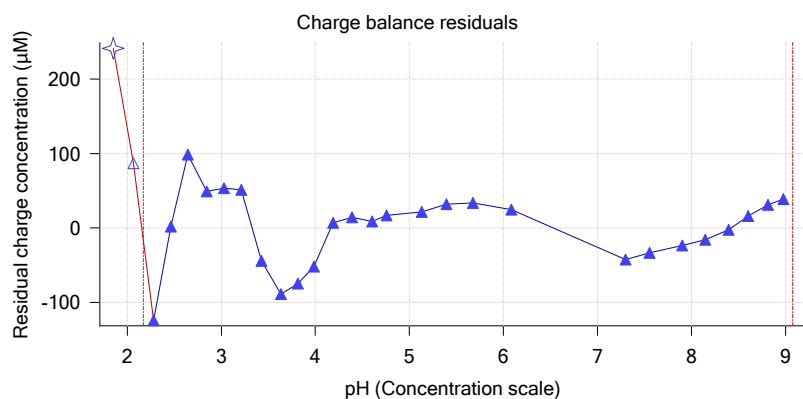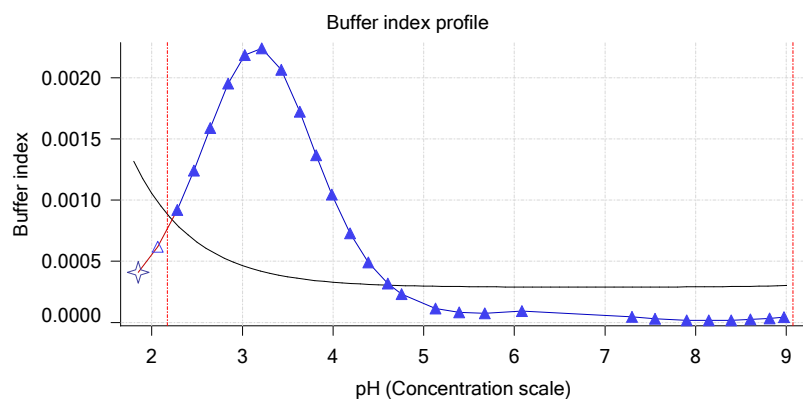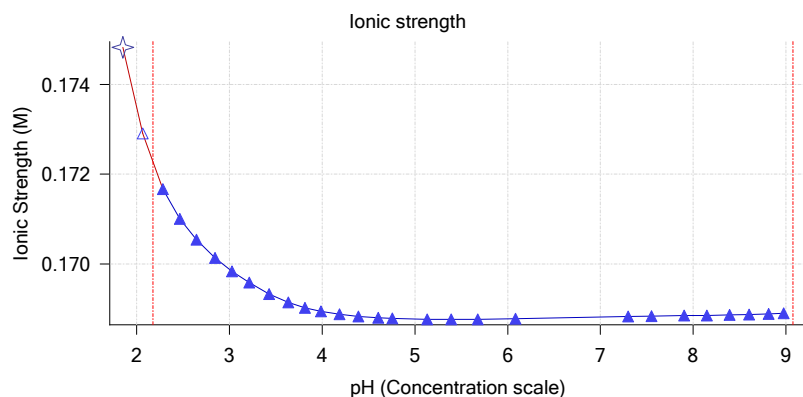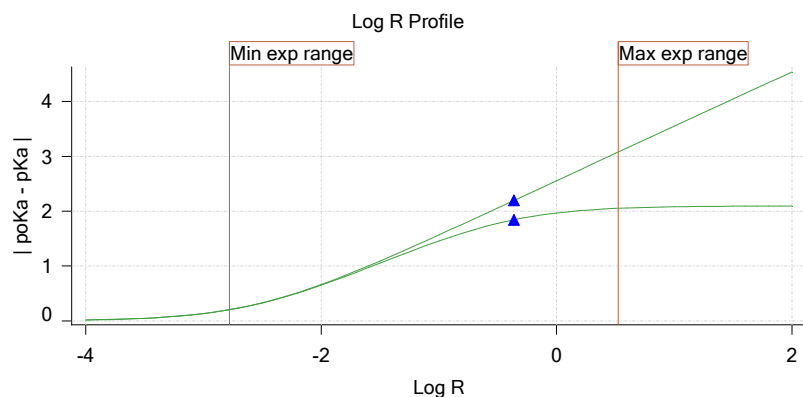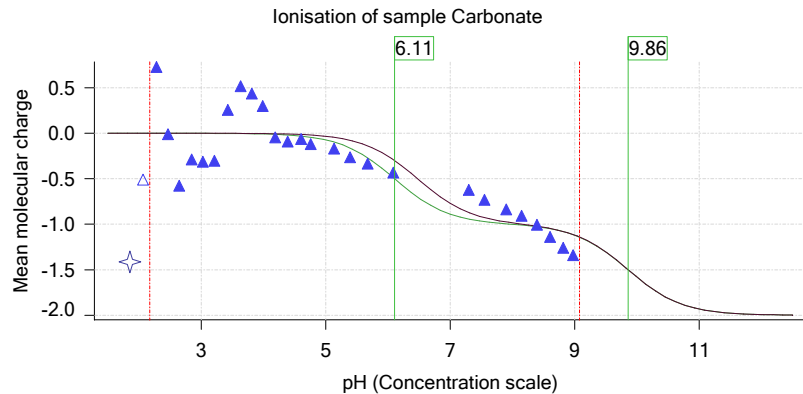

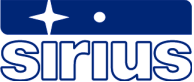

## Assay model

Sample name: **M18\_octanol** Experiment start time: **3/9/2018 9:53:01 PM**  
Assay name: **pH-metric high logP** Analyst: **Pion**  
Assay ID: **18C-09015** Instrument ID: **T312060**  
Filename: **C:\Sirius\_T3\Mehtap\20180309\_exp31\_logP\_T3-2\18C-09015\_M18\_octanol\_pH-metric high logP.t3r**

## Assay Model

| Settings                          | Value        | Date/Time changed    | Imported from      |
|-----------------------------------|--------------|----------------------|--------------------|
| Sample name                       | M18_octanol  | 2/27/2018 7:08:39 PM | User entered value |
| Sample by                         | Weight       |                      | Default value      |
| Sample weight                     | 0.001670 g   | 3/9/2018 2:22:44 PM  | User entered value |
| Formula weight                    | 267.11 g/mol | 2/27/2018 7:08:39 PM | User entered value |
| Solubility                        | Unknown      |                      | Default value      |
| Molecular weight                  | 267.11       | 2/27/2018 7:08:39 PM | User entered value |
| Individual pKa ionic environments | No           |                      | Default value      |
| Number of pKas                    | 2            | 2/27/2018 7:08:39 PM | User entered value |
| Sample is a                       | Ampholyte    | 2/27/2018 7:08:39 PM | User entered value |
| pKa 1                             | 5.37         | 2/27/2018 7:08:39 PM | User entered value |
| Type                              | Base         | 2/27/2018 7:08:39 PM | User entered value |
| pKa 2                             | 10.65        | 2/27/2018 7:08:39 PM | User entered value |
| Type                              | Acid         | 2/27/2018 7:08:39 PM | User entered value |
| logp (XH2 +)                      | -0.35        | 2/28/2018 3:20:28 PM | User entered value |
| logP (neutral XH)                 | 2.57         | 3/2/2018 4:34:50 PM  | User entered value |
| logP (X -)                        | 0.46         | 2/27/2018 7:09:34 PM | User entered value |

## Events

| Time    | Event                  | Water      | Acid       | Base       | Octanol    | pH    | dpH/dt   | pH R-squared | pH SD   | dpH/<br>time      |
|---------|------------------------|------------|------------|------------|------------|-------|----------|--------------|---------|-------------------|
| 4:58.2  | Manual volume addition |            |            |            | 0.10000 mL |       |          |              |         |                   |
| 4:59.3  | Initial pH = 8.13      |            |            |            |            |       |          |              |         |                   |
| 7:58.9  | Data point 2           | 1.50000 mL | 0.05148 mL | 0.00405 mL | 0.10000 mL | 2.064 | -0.00398 | 0.61752      | 0.00025 | 10.0<br>s         |
| 8:45.1  | Data point 3           | 1.50000 mL | 0.05148 mL | 0.01646 mL | 0.10000 mL | 2.270 | 0.00032  | 0.01048      | 0.00015 | 10.0<br>s         |
| 9:20.7  | Data point 4           | 1.50000 mL | 0.05148 mL | 0.02441 mL | 0.10000 mL | 2.467 | 0.00127  | 0.33156      | 0.00011 | 10.0<br>s         |
| 9:56.2  | Data point 5           | 1.50000 mL | 0.05148 mL | 0.02954 mL | 0.10000 mL | 2.663 | -0.00044 | 0.05449      | 0.00009 | 10.0<br>s         |
| 10:31.9 | Data point 6           | 1.50000 mL | 0.05148 mL | 0.03295 mL | 0.10000 mL | 2.835 | -0.00106 | 0.08335      | 0.00018 | 10.5<br>s         |
| 11:18.2 | Data point 7           | 1.50000 mL | 0.05148 mL | 0.03523 mL | 0.10000 mL | 3.034 | -0.00637 | 0.44601      | 0.00047 | 10.0<br>s         |
| 11:53.8 | Data point 8           | 1.50000 mL | 0.05148 mL | 0.03709 mL | 0.10000 mL | 3.244 | -0.00918 | 0.56183      | 0.00060 | 10.5<br>s         |
| 12:29.7 | Data point 9           | 1.50000 mL | 0.05148 mL | 0.03866 mL | 0.10000 mL | 3.411 | -0.01473 | 0.74716      | 0.00084 | 10.0<br>s         |
| 13:25.9 | Data point 10          | 1.50000 mL | 0.05148 mL | 0.04080 mL | 0.10000 mL | 3.635 | -0.01009 | 0.71263      | 0.00059 | 10.0<br>s         |
| 14:11.7 | Data point 11          | 1.50000 mL | 0.05148 mL | 0.04240 mL | 0.10000 mL | 3.828 | -0.01257 | 0.80770      | 0.00069 | 10.0<br>s         |
| 14:47.2 | Data point 12          | 1.50000 mL | 0.05148 mL | 0.04400 mL | 0.10000 mL | 4.027 | -0.00532 | 0.89260      | 0.00028 | 10.0<br>s         |
| 15:22.6 | Data point 13          | 1.50000 mL | 0.05148 mL | 0.04558 mL | 0.10000 mL | 4.210 | -0.01823 | 0.90318      | 0.00095 | 16.0<br>s         |
| 16:04.1 | Data point 14          | 1.50000 mL | 0.05148 mL | 0.04701 mL | 0.10000 mL | 4.312 | -0.10209 | 0.99736      | 0.00505 | Time<br>out<br>at |
| 17:50.2 | Data point 15          | 1.50000 mL | 0.05148 mL | 0.04908 mL | 0.10000 mL | 4.398 | -0.03232 | 0.99319      | 0.00160 | Time<br>out<br>at |
| 19:31.1 | Data point 16          | 1.50000 mL | 0.05148 mL | 0.05047 mL | 0.10000 mL | 4.604 | -0.02003 | 0.98669      | 0.00100 | 45.5<br>s         |
| 20:42.0 | Data point 17          | 1.50000 mL | 0.05148 mL | 0.05146 mL | 0.10000 mL | 5.249 | -0.01859 | 0.86523      | 0.00099 | 26.0<br>s         |

Sample name: **M18\_octanol** Experiment start time: **3/9/2018 9:53:01 PM**  
 Assay name: **pH-metric high logP** Analyst: **Pion**  
 Assay ID: **18C-09015** Instrument ID: **T312060**  
 Filename: **C:\Sirius\_T3\Mehtap\20180309\_exp31\_logP\_T3-2\18C-09015\_M18\_octanol\_pH-metric high logP.t3r**

## Events (continued)

| Time      | Event         | Water      | Acid       | Base       | Octanol    | pH    | dpH/dt   | pH R-squared | pH SD   | dpH/dt time         |
|-----------|---------------|------------|------------|------------|------------|-------|----------|--------------|---------|---------------------|
| 21:38.6   | Data point 18 | 1.50000 mL | 0.05148 mL | 0.05200 mL | 0.10000 mL | 8.408 | -0.02877 | 0.97980      | 0.00144 | Timed out at 59.5 s |
| 23:14.2   | Data point 19 | 1.50000 mL | 0.05148 mL | 0.05219 mL | 0.10000 mL | 8.882 | -0.01997 | 0.97577      | 0.00100 | 54.5 s              |
| 24:44.4   | Data point 20 | 1.50000 mL | 0.05148 mL | 0.05228 mL | 0.10000 mL | 9.072 | -0.01991 | 0.96826      | 0.00100 | 32.0 s              |
| 26:19.4   | Data point 21 | 1.50000 mL | 0.10948 mL | 0.05228 mL | 0.30000 mL | 1.985 | -0.00807 | 0.73649      | 0.00046 | 10.0 s              |
| 27:05.6   | Data point 22 | 1.50000 mL | 0.10948 mL | 0.06886 mL | 0.30000 mL | 2.191 | -0.00302 | 0.06536      | 0.00058 | 10.0 s              |
| 27:41.3   | Data point 23 | 1.50000 mL | 0.10948 mL | 0.07937 mL | 0.30000 mL | 2.384 | 0.00289  | 0.58885      | 0.00019 | 10.0 s              |
| 28:16.9   | Data point 24 | 1.50000 mL | 0.10948 mL | 0.08619 mL | 0.30000 mL | 2.610 | -0.00234 | 0.02222      | 0.00078 | 10.5 s              |
| 28:52.9   | Data point 25 | 1.50000 mL | 0.10948 mL | 0.09055 mL | 0.30000 mL | 2.789 | -0.00887 | 0.28002      | 0.00083 | 10.0 s              |
| 29:28.4   | Data point 26 | 1.50000 mL | 0.10948 mL | 0.09377 mL | 0.30000 mL | 2.975 | -0.00368 | 0.74326      | 0.00021 | 10.5 s              |
| 30:04.5   | Data point 27 | 1.50000 mL | 0.10948 mL | 0.09633 mL | 0.30000 mL | 3.139 | -0.00884 | 0.23194      | 0.00091 | 10.0 s              |
| 30:50.3   | Data point 28 | 1.50000 mL | 0.10948 mL | 0.09889 mL | 0.30000 mL | 3.334 | -0.01064 | 0.80030      | 0.00059 | 10.5 s              |
| 31:26.3   | Data point 29 | 1.50000 mL | 0.10948 mL | 0.10094 mL | 0.30000 mL | 3.577 | -0.01028 | 0.41136      | 0.00079 | 10.0 s              |
| 32:12.0   | Data point 30 | 1.50000 mL | 0.10948 mL | 0.10280 mL | 0.30000 mL | 3.773 | -0.00666 | 0.87855      | 0.00035 | 10.5 s              |
| 32:48.0   | Data point 31 | 1.50000 mL | 0.10948 mL | 0.10442 mL | 0.30000 mL | 3.947 | -0.01424 | 0.74500      | 0.00081 | 10.0 s              |
| 33:33.8   | Data point 32 | 1.50000 mL | 0.10948 mL | 0.10600 mL | 0.30000 mL | 4.149 | -0.00724 | 0.88195      | 0.00038 | 10.5 s              |
| 34:09.8   | Data point 33 | 1.50000 mL | 0.10948 mL | 0.10706 mL | 0.30000 mL | 4.340 | -0.00713 | 0.59165      | 0.00046 | 10.0 s              |
| 34:45.3   | Data point 34 | 1.50000 mL | 0.10948 mL | 0.10786 mL | 0.30000 mL | 4.525 | -0.01579 | 0.72847      | 0.00091 | 10.0 s              |
| 35:20.7   | Data point 35 | 1.50000 mL | 0.10948 mL | 0.10842 mL | 0.30000 mL | 4.747 | -0.01335 | 0.78441      | 0.00074 | 10.5 s              |
| 35:56.6   | Data point 36 | 1.50000 mL | 0.10948 mL | 0.10880 mL | 0.30000 mL | 4.951 | -0.00800 | 0.24231      | 0.00080 | 10.5 s              |
| 36:32.5   | Data point 37 | 1.50000 mL | 0.10948 mL | 0.10903 mL | 0.30000 mL | 5.127 | -0.01493 | 0.70300      | 0.00088 | 11.0 s              |
| 37:14.0   | Data point 38 | 1.50000 mL | 0.10948 mL | 0.10936 mL | 0.30000 mL | 5.672 | -0.01880 | 0.88256      | 0.00099 | 29.5 s              |
| 38:19.4   | Data point 39 | 1.50000 mL | 0.10948 mL | 0.10969 mL | 0.30000 mL | 7.963 | -0.08034 | 0.99469      | 0.00398 | Timed out at 59.5 s |
| 40:00.2   | Data point 40 | 1.50000 mL | 0.10948 mL | 0.10985 mL | 0.30000 mL | 8.691 | -0.01737 | 0.90449      | 0.00090 | 50.5 s              |
| 41:26.4   | Data point 41 | 1.50000 mL | 0.10948 mL | 0.11000 mL | 0.30000 mL | 9.055 | -0.02009 | 0.98442      | 0.00100 | 30.0 s              |
| 43:22.0   | Data point 42 | 1.50000 mL | 0.17251 mL | 0.11000 mL | 0.80000 mL | 1.964 | -0.00989 | 0.81980      | 0.00054 | 10.0 s              |
| 44:08.3   | Data point 43 | 1.50000 mL | 0.17251 mL | 0.12900 mL | 0.80000 mL | 2.170 | 0.00443  | 0.37114      | 0.00036 | 10.0 s              |
| 44:44.0   | Data point 44 | 1.50000 mL | 0.17251 mL | 0.14088 mL | 0.80000 mL | 2.382 | 0.00263  | 0.03724      | 0.00067 | 10.5 s              |
| 45:20.1   | Data point 45 | 1.50000 mL | 0.17251 mL | 0.14857 mL | 0.80000 mL | 2.564 | -0.00827 | 0.25892      | 0.00080 | 10.0 s              |
| 45:55.7   | Data point 46 | 1.50000 mL | 0.17251 mL | 0.15404 mL | 0.80000 mL | 2.741 | -0.00871 | 0.52375      | 0.00059 | 10.0 s              |
| 46:31.2   | Data point 47 | 1.50000 mL | 0.17251 mL | 0.15818 mL | 0.80000 mL | 2.939 | 0.00202  | 0.06322      | 0.00040 | 10.5 s              |
| 47:07.2   | Data point 48 | 1.50000 mL | 0.17251 mL | 0.16141 mL | 0.80000 mL | 3.121 | -0.00814 | 0.90284      | 0.00042 | 10.0 s              |
| 47:42.7   | Data point 49 | 1.50000 mL | 0.17251 mL | 0.16409 mL | 0.80000 mL | 3.304 | 0.00201  | 0.05752      | 0.00041 | 10.5 s              |
| 48:18.7   | Data point 50 | 1.50000 mL | 0.17251 mL | 0.16634 mL | 0.80000 mL | 3.520 | -0.01362 | 0.46718      | 0.00098 | 10.0 s              |
| 48:54.2   | Data point 51 | 1.50000 mL | 0.17251 mL | 0.16813 mL | 0.80000 mL | 3.724 | -0.00424 | 0.07060      | 0.00079 | 10.0 s              |
| 49:29.6   | Data point 52 | 1.50000 mL | 0.17251 mL | 0.16950 mL | 0.80000 mL | 3.903 | -0.00679 | 0.94080      | 0.00035 | 10.5 s              |
| 50:05.6   | Data point 53 | 1.50000 mL | 0.17251 mL | 0.17053 mL | 0.80000 mL | 4.076 | 0.00436  | 0.17804      | 0.00051 | 10.0 s              |
| 50:56.5   | Data point 54 | 1.50000 mL | 0.17251 mL | 0.17154 mL | 0.80000 mL | 4.276 | -0.00388 | 0.13097      | 0.00053 | 10.0 s              |
| 51:47.4   | Data point 55 | 1.50000 mL | 0.17251 mL | 0.17211 mL | 0.80000 mL | 4.477 | -0.01051 | 0.37200      | 0.00085 | 10.0 s              |
| 52:22.7   | Data point 56 | 1.50000 mL | 0.17251 mL | 0.17246 mL | 0.80000 mL | 4.690 | -0.01333 | 0.59091      | 0.00086 | 11.0 s              |
| 52:59.1   | Data point 57 | 1.50000 mL | 0.17251 mL | 0.17267 mL | 0.80000 mL | 4.843 | -0.01303 | 0.56430      | 0.00086 | 11.0 s              |
| 53:40.6   | Data point 58 | 1.50000 mL | 0.17251 mL | 0.17295 mL | 0.80000 mL | 5.218 | -0.01867 | 0.86298      | 0.00099 | 28.0 s              |
| 54:39.2   | Data point 59 | 1.50000 mL | 0.17251 mL | 0.17310 mL | 0.80000 mL | 5.477 | -0.01831 | 0.92742      | 0.00094 | 31.0 s              |
| 55:40.7   | Data point 60 | 1.50000 mL | 0.17251 mL | 0.17319 mL | 0.80000 mL | 5.760 | -0.01927 | 0.92709      | 0.00099 | 35.5 s              |
| 56:46.8   | Data point 61 | 1.50000 mL | 0.17251 mL | 0.17328 mL | 0.80000 mL | 6.166 | -0.01962 | 0.94684      | 0.00100 | 59.0 s              |
| 58:16.4   | Data point 62 | 1.50000 mL | 0.17251 mL | 0.17342 mL | 0.80000 mL | 7.377 | -0.12941 | 0.99771      | 0.00639 | Timed out at 59.5 s |
| 59:46.9   | Data point 63 | 1.50000 mL | 0.17251 mL | 0.17350 mL | 0.80000 mL | 7.630 | -0.07477 | 0.98222      | 0.00373 | Timed out at 59.5 s |
| 1:01:22.5 | Data point 64 | 1.50000 mL | 0.17251 mL | 0.17357 mL | 0.80000 mL | 7.978 | -0.05777 | 0.98086      | 0.00288 | Timed out at 59.5 s |
| 1:02:53.1 | Data point 65 | 1.50000 mL | 0.17251 mL | 0.17361 mL | 0.80000 mL | 8.222 | -0.03185 | 0.98956      | 0.00158 | Timed out at 59.5 s |
| 1:04:28.8 | Data point 66 | 1.50000 mL | 0.17251 mL | 0.17368 mL | 0.80000 mL | 8.468 | -0.02381 | 0.91426      | 0.00123 | Timed out at 59.5 s |
| 1:06:09.5 | Data point 67 | 1.50000 mL | 0.17251 mL | 0.17378 mL | 0.80000 mL | 8.677 | -0.01737 | 0.85617      | 0.00093 | 43.5 s              |

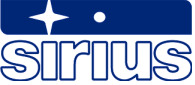

# Assay Events

Sample name: **M18\_octanol** Experiment start time: **3/9/2018 9:53:01 PM**  
Assay name: **pH-metric high logP** Analyst: **Pion**  
Assay ID: **18C-09015** Instrument ID: **T312060**  
Filename: **C:\Sirius\_T3\Mehtap\20180309\_exp31\_logP\_T3-2\18C-09015\_M18\_octanol\_pH-metric high logP.t3r**

## Events (continued)

| Time      | Event         | Water      | Acid       | Base       | Octanol    | pH    | dpH/dt   | pH R-squared | pH SD   | dpH/dt<br>time |
|-----------|---------------|------------|------------|------------|------------|-------|----------|--------------|---------|----------------|
| 1:07:28.7 | Data point 68 | 1.50000 mL | 0.17251 mL | 0.17387 mL | 0.80000 mL | 8.888 | -0.01877 | 0.89665      | 0.00098 | 35.5 s         |
| 1:08:34.8 | Data point 69 | 1.50000 mL | 0.17251 mL | 0.17394 mL | 0.80000 mL | 9.048 | -0.01938 | 0.95152      | 0.00098 | 14.0 s         |
| 1:08:57.9 | Assay volumes | 1.50000 mL | 0.17251 mL | 0.17394 mL | 0.80000 mL |       |          |              |         |                |

Sample name: **M18\_octanol**  
 Assay name: **pH-metric high logP**  
 Assay ID: **18C-09015**  
 Filename: **C:\Sirius\_T3\Mehtap\20180309\_exp31\_logP\_T3-2\18C-09015\_M18\_octanol\_pH-metric high logP.t3r**

Experiment start time: **3/9/2018 9:53:01 PM**  
 Analyst: **Pion**  
 Instrument ID: **T312060**

## Assay Settings

| Setting                             | Value              | Original Value | Date/Time changed | Imported from |
|-------------------------------------|--------------------|----------------|-------------------|---------------|
| <b>General Settings</b>             |                    |                |                   |               |
| Analyst name                        | Pion               |                |                   |               |
| <b>Standard Experiment Settings</b> |                    |                |                   |               |
| Number of titrations                | 3                  |                |                   |               |
| Minimum pH                          | 2.000              |                |                   |               |
| Maximum pH                          | 9.000              |                |                   |               |
| pH step between points of           | 0.200              |                |                   |               |
| Minimum titrant addition            | 0.00002 mL         |                |                   |               |
| Maximum titrant addition            | 0.10000 mL         |                |                   |               |
| Argon flow rate                     | 100%               |                |                   |               |
| Start titration using               | Cautious pH adjust |                |                   |               |
| <b>Advanced General Settings</b>    |                    |                |                   |               |
| Detect turbidity using              | None               |                |                   |               |
| Collect turbidity sensor data       | No                 |                |                   |               |
| Collect UV spectra                  | No                 |                |                   |               |
| Stir after titrant addition for     | 5 seconds          |                |                   |               |
| For titrant addition, stir at       | 10%                |                |                   |               |
| <b>Titration Pre-Dose</b>           |                    |                |                   |               |
| Titration pre-dose                  | None               |                |                   |               |
| <b>Assay Medium</b>                 |                    |                |                   |               |
| ISA water volume                    | 1.50 mL            |                |                   |               |
| Water added                         | Automatic          |                |                   |               |
| Partition solvent type              | Octanol            |                |                   |               |
| Partition volume                    | 0.100 mL           |                |                   |               |
| Partition solvent added             | Manual in advance  |                |                   |               |
| After partition addition, stir for  | 1 seconds          |                |                   |               |
| <b>Sample Sonication</b>            |                    |                |                   |               |
| Sonicate                            | Yes                |                |                   |               |
| Adjust pH for sonication            | No                 |                |                   |               |
| Sonicate for                        | 60 seconds         |                |                   |               |
| After sonication stir for           | 5 seconds          |                |                   |               |
| <b>Sample Dissolution</b>           |                    |                |                   |               |
| Perform a dissolution stage         | Yes                |                |                   |               |
| Adjust and hold pH for dissolution  | To start pH        |                |                   |               |
| Stir to dissolve for                | 120 seconds        |                |                   |               |
| For dissolution, stir at            | 10%                |                |                   |               |
| <b>Carbonate purge</b>              |                    |                |                   |               |
| Perform a carbonate purge           | No                 |                |                   |               |
| <b>Temperature Control</b>          |                    |                |                   |               |
| Wait for temperature                | Yes                |                |                   |               |
| Required start temperature          | 25.0°C             |                |                   |               |
| Acceptable deviation                | 0.5°C              |                |                   |               |
| Time to wait                        | 60 seconds         |                |                   |               |
| Stir speed of                       | 50%                |                |                   |               |
| <b>Titration 1</b>                  |                    |                |                   |               |
| Titrate from                        | Low to high pH     |                |                   |               |
| Adjust to start pH                  | Yes                |                |                   |               |
| After pH adjust stir for            | 30 seconds         |                |                   |               |
| Stir to allow partitioning for      | 15 seconds         |                |                   |               |
| Stirrer speed for partitioning      | 50%                |                |                   |               |
| <b>Titration 2</b>                  |                    |                |                   |               |
| Titrate from                        | Low to high pH     |                |                   |               |
| Add additional water                | 0.00 mL            |                |                   |               |
| Additional partition solvent volume | 0.200 mL           |                |                   |               |
| Additional partition solvent added  | Automatic          |                |                   |               |
| After pH adjust stir for            | 30 seconds         |                |                   |               |
| Stir to allow partitioning for      | 15 seconds         |                |                   |               |
| Stirrer speed for partitioning      | 55%                |                |                   |               |



Sample name: **M18\_octanol**  
 Assay name: **pH-metric high logP**  
 Assay ID: **18C-09015**  
 Filename: **C:\Sirius\_T3\Mehtap\20180309\_exp31\_logP\_T3-2\18C-09015\_M18\_octanol\_pH-metric high logP.t3r**

Experiment start time: **3/9/2018 9:53:01 PM**  
 Analyst: **Pion**  
 Instrument ID: **T312060**

## Assay Settings (continued)

| Setting                             | Value          | Original Value | Date/Time changed | Imported from |
|-------------------------------------|----------------|----------------|-------------------|---------------|
| <b>Titration 3</b>                  |                |                |                   |               |
| Titrate from                        | Low to high pH |                |                   |               |
| Add additional water                | 0.00 mL        |                |                   |               |
| Additional partition solvent volume | 0.500 mL       |                |                   |               |
| Additional partition solvent added  | Automatic      |                |                   |               |
| After pH adjust stir for            | 30 seconds     |                |                   |               |
| Stir to allow partitioning for      | 15 seconds     |                |                   |               |
| Stirrer speed for partitioning      | 60%            |                |                   |               |
| <b>Data Point Stability</b>         |                |                |                   |               |
| Stir during data point collection   | No             |                |                   |               |
| Delay before data point collection  | 0 seconds      |                |                   |               |
| Number of points to average         | 20 points      |                |                   |               |
| Time interval between points        | 0.50 seconds   |                |                   |               |
| Required maximum standard deviation | 0.00100 dpH/dt |                |                   |               |
| Stability timeout after             | 60 seconds     |                |                   |               |

## Calibration Settings

| Setting                   | Value  | Date/Time changed   | Imported from             |
|---------------------------|--------|---------------------|---------------------------|
| Four-Plus alpha           | 0.102  | 3/9/2018 9:53:01 PM | C:\Sirius_T3\HCl18C09.t3r |
| Four-Plus S               | 0.9967 | 3/9/2018 9:53:01 PM | C:\Sirius_T3\HCl18C09.t3r |
| Four-Plus jH              | 1.2    | 3/9/2018 9:53:01 PM | C:\Sirius_T3\HCl18C09.t3r |
| Four-Plus jOH             | 0.0    | 3/9/2018 9:53:01 PM | C:\Sirius_T3\HCl18C09.t3r |
| Base concentration factor | 1.000  | 3/9/2018 9:53:01 PM | C:\Sirius_T3\KOH18B27.t3r |
| Acid concentration factor | 1.000  | 3/9/2018 9:53:01 PM | C:\Sirius_T3\HCl18C09.t3r |

## Instrument Settings

| Setting              | Value                      | Batch Id    | Install date           |
|----------------------|----------------------------|-------------|------------------------|
| Instrument owner     | Merck                      |             |                        |
| Instrument ID        | T312060                    |             |                        |
| Instrument type      | T3 Simulator               |             |                        |
| Software version     | 1.1.3.0                    |             |                        |
| Dispenser module     |                            | T3DM1200361 | 3/31/2009 6:24:52 AM   |
| Dispenser 0          | Water                      |             | 3/31/2009 6:25:05 AM   |
| Syringe volume       | 2.5 mL                     |             |                        |
| Firmware version     | 1.2.1(r2)                  |             |                        |
| Titrant              | Water (0.15 M KCl)         | 02-06-2018  | 2/27/2018 11:05:59 AM  |
| Dispenser 2          | Acid                       |             | 3/31/2009 6:25:11 AM   |
| Syringe volume       | 0.5 mL                     |             |                        |
| Firmware version     | 1.2.1(r2)                  |             |                        |
| Titrant              | Acid (0.5 M HCl)           | 02-27-2018  | 2/27/2018 11:27:22 AM  |
| Dispenser 1          | Base                       |             | 3/31/2009 6:25:21 AM   |
| Syringe volume       | 0.5 mL                     |             |                        |
| Firmware version     | 1.2.1(r2)                  |             |                        |
| Titrant              | Base (0.5 M KOH)           | 9/22/2017   | 2/27/2018 11:21:22 AM  |
| Dispenser 5          | Cosolvent                  |             | 3/31/2009 6:26:24 AM   |
| Syringe volume       | 2.5 mL                     |             |                        |
| Firmware version     | 1.2.1(r2)                  |             |                        |
| Distribution valve 5 | Distribution Valve         |             | 3/31/2009 6:28:19 AM   |
| Firmware version     | 1.1.3                      |             |                        |
| Port A               | Methanol (80%, 0.15 M KCl) | 02-08-2018  | 3/6/2018 10:28:59 AM   |
| Port B               | Cyclohexane                | 11-01-17    | 2/27/2018 11:37:57 AM  |
| Dispenser 3          | Buffer                     |             | 8/3/2010 6:05:16 AM    |
| Syringe volume       | 0.5 mL                     |             |                        |
| Firmware version     | 1.2.1(r2)                  |             |                        |
| Titrant              | Dodecane                   | 2018/01/31  | 2/28/2018 11:18:04 AM  |
| Dispenser 6          | Octanol                    |             | 10/22/2010 11:52:43 AM |

Sample name: **M18\_octanol**  
 Assay name: **pH-metric high logP**  
 Assay ID: **18C-09015**  
 Filename: **C:\Sirius\_T3\Mehtap\20180309\_exp31\_logP\_T3-2\18C-09015\_M18\_octanol\_pH-metric high logP.t3r**

Experiment start time: **3/9/2018 9:53:01 PM**  
 Analyst: **Pion**  
 Instrument ID: **T312060**

## Instrument Settings (continued)

| Setting                                   | Value                      | Batch Id    | Install date           |
|-------------------------------------------|----------------------------|-------------|------------------------|
| Syringe volume                            | 0.5 mL                     |             |                        |
| Firmware version                          | 1.2.1(r2)                  |             |                        |
| Titration                                 | Octanol                    | 01-31-2018  | 2/27/2018 10:59:35 AM  |
| Titration                                 |                            | T3TM1200161 | 3/31/2009 6:24:17 AM   |
| Horizontal axis firmware version          | 1.17 AI1DI2DO2 Stepper 2   |             |                        |
| Vertical axis firmware version            | 1.17 AI1DI2DO2 Stepper 2   |             |                        |
| Chassis I/O firmware version              | 1.11 AI1DI0DO4 Norgren I/O |             |                        |
| Probe I/O firmware version                | 1.1.1                      |             |                        |
| Electrode                                 | T3 Electrode               | T3E0923     | 1/23/2018 3:01:00 PM   |
| E0 calibration                            | +4.36 mV                   |             | 3/9/2018 9:53:29 PM    |
| Filling solution                          | 3M KCl                     | KCL097      | 3/9/2018 11:05:42 AM   |
| Liquids                                   |                            |             |                        |
| Wash 1                                    | 50% IPA:50% Water          |             | 3/9/2018 11:04:22 AM   |
| Wash 2                                    | 0.5% Triton X-100 in H2O   |             | 3/9/2018 11:04:25 AM   |
| Buffer position 1                         | pH7 Wash                   |             | 3/9/2018 11:04:27 AM   |
| Buffer position 2                         | pH 7                       |             | 3/9/2018 11:04:30 AM   |
| Storage position                          |                            |             | 3/9/2018 11:05:04 AM   |
| Wash water                                | 5e+003 mL                  | 02-27-2018  | 2/27/2018 10:54:39 AM  |
| Waste                                     | 1.1e+004 mL                |             | 11/28/2017 11:36:29 AM |
| Temperature controller                    |                            |             | 8/5/2010 7:35:13 AM    |
| Turbidity detector                        |                            |             | 3/31/2009 6:24:45 AM   |
| Spectrometer                              |                            | 074811      | 11/23/2010 12:22:28 PM |
| Dip probe                                 |                            | 10196       |                        |
| Wavelength coefficient A0                 | 183.333                    |             |                        |
| Wavelength coefficient A1                 | 2.21568                    |             |                        |
| Wavelength coefficient A2                 | -0.000289308               |             |                        |
| Total lamp lit time                       | 123:16:41                  |             | 11/23/2010 12:22:28 PM |
| Calibrated on                             | 2/27/2018 11:40:38 AM      |             |                        |
| Integration time                          | 40                         |             |                        |
| Scans averaged                            | 10                         |             |                        |
| Autoloader                                |                            | T3AL1200345 | 11/10/2015 10:34:13 AM |
| Left-right axis firmware version          | 1.17 AI1DI2DO2 Stepper 2   |             |                        |
| Front-back axis firmware version          | 1.17 AI1DI2DO2 Stepper 2   |             |                        |
| Vertical axis firmware version            | 1.17 AI1DI2DO2 Stepper 2   |             |                        |
| Chassis I/O firmware version              | 1.11 AI1DI0DO4 Norgren I/O |             |                        |
| Configuration                             |                            |             |                        |
| Alternate titration position              | Titration position         |             |                        |
| Alternate reference position              | Reference position         |             |                        |
| Maximum standard vial volume              | 3.50 mL                    |             |                        |
| Maximum alternate vial volume             | 25.00 mL                   |             |                        |
| Automatic action idle period              | 5 minute(s)                |             |                        |
| Titration tube volume                     | 1.3 mL                     |             |                        |
| Syringe flush count                       | 3.50                       |             |                        |
| Flowing wash pump volume                  | 20.0 mL                    |             |                        |
| Flowing wash stir duration                | 5 s                        |             |                        |
| Flowing wash stir speed                   | 30%                        |             |                        |
| Solvent wash stir duration                | 5 s                        |             |                        |
| Solvent wash stir speed                   | 30%                        |             |                        |
| Surfactant wash stir duration             | 5 s                        |             |                        |
| Surfactant wash stir speed                | 30%                        |             |                        |
| E0 calibration minimum number of points   | 10                         |             |                        |
| E0 calibration maximum standard deviation | 0.01500                    |             |                        |
| E0 calibration timeout period             | 60 s                       |             |                        |
| E0 calibration stir duration              | 5 s                        |             |                        |
| E0 calibration preparation stir speed     | 30%                        |             |                        |
| E0 calibration buffer wash stir duration  | 5 s                        |             |                        |
| E0 calibration buffer wash stir speed     | 30%                        |             |                        |
| E0 calibration reading stir speed         | 0%                         |             |                        |

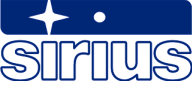

## Assay Settings

Sample name: **M18\_octanol**  
Assay name: **pH-metric high logP**  
Assay ID: **18C-09015**  
Filename: **C:\Sirius\_T3\Mehtap\20180309\_exp31\_logP\_T3-2\18C-09015\_M18\_octanol\_pH-metric high logP.t3r**

Experiment start time: **3/9/2018 9:53:01 PM**  
Analyst: **Pion**  
Instrument ID: **T312060**

### Instrument Settings (continued)

| Setting                                     | Value   | Batch Id | Install date |
|---------------------------------------------|---------|----------|--------------|
| Spectrometer calibration stir duration      | 5 s     |          |              |
| Spectrometer calibration stir speed         | 30%     |          |              |
| Spectrometer calibration wash pump volume   | 20.0 mL |          |              |
| Spectrometer calibration wash stir duration | 5 s     |          |              |
| Spectrometer calibration wash stir speed    | 30%     |          |              |
| Overhead dispense height                    | 10000   |          |              |

### Refinement Settings

| Setting                        | Value    | Default value |
|--------------------------------|----------|---------------|
| Turbidity detection method     | None     | None          |
| Turbidity wavelength to assess | 500.0 nm | 500.0 nm      |
| Turbidity maximum absorbance   | 0.100    | 0.100         |
| Turbidity probe threshold      | 50.00    | 50.00         |
