# Supplementary material for: Octanol-water partition coefficient measurements for the SAMPL6 Blind Prediction Challenge
Source: bioRxiv or medRxiv preprint supplement (doi:10.1101/757393), 2019-12-02
Supplement: Supplementary file [file media-2.zip]

Sample name: **M12\_octanol**  
 Assay name: **pH-metric high logP**  
 Assay ID: **18C-03014**  
 Filename: **C:\Sirius\_T3\Mehtap\20180302\_exp29\_logP\_T3-2\18C-03014\_M12\_octanol\_pH-metric high logP.t3r**

Experiment start time: **3/3/2018 6:11:21 PM**  
 Analyst: **Pion**  
 Instrument ID: **T312060**

## pH-metric Result

logP (XH +) 0.62 ±0.05 (n=50)  
 logP (neutral X) 3.91 ±0.01 (n=50)

### 18C-03014 Points 1 to 25

M12\_octanol concentration factor 0.960  
 Carbonate 0.5327 mM  
 Acidity error -1.77424 mM

### 18C-03014 Points 26 to 51

M12\_octanol concentration factor 1.007  
 Carbonate 0.2455 mM  
 Acidity error -1.88168 mM

### 18C-03014 Points 52 to 76

M12\_octanol concentration factor 1.171  
 Carbonate 0.3091 mM  
 Acidity error -3.49881 mM

## Warnings and errors

Errors None  
 Warnings Excessive carbonate concentration present

## Sample logD and percent species

| pH     | M12_octanol<br>logD | M12_octanol<br>M12_octanolH | M12_octanol<br>M12_octanol | M12_octanol<br>M12_octanolH* | M12_octanol<br>M12_octanol* | Comment    |
|--------|---------------------|-----------------------------|----------------------------|------------------------------|-----------------------------|------------|
| 1.000  | 0.66                | 17.81 %                     | 0.00 %                     | 74.63 %                      | 7.56 %                      | Stomach pH |
| 1.200  | 0.69                | 17.06 %                     | 0.00 %                     | 71.47 %                      | 11.47 %                     |            |
| 2.000  | 0.93                | 10.60 %                     | 0.01 %                     | 44.41 %                      | 44.98 %                     |            |
| 3.000  | 1.67                | 2.10 %                      | 0.01 %                     | 8.80 %                       | 89.09 %                     |            |
| 4.000  | 2.61                | 0.23 %                      | 0.01 %                     | 0.98 %                       | 98.78 %                     |            |
| 5.000  | 3.45                | 0.02 %                      | 0.01 %                     | 0.10 %                       | 99.87 %                     | Blood pH   |
| 6.000  | 3.83                | 0.00 %                      | 0.01 %                     | 0.01 %                       | 99.98 %                     |            |
| 6.500  | 3.88                | 0.00 %                      | 0.01 %                     | 0.00 %                       | 99.98 %                     |            |
| 7.000  | 3.90                | 0.00 %                      | 0.01 %                     | 0.00 %                       | 99.99 %                     |            |
| 7.400  | 3.90                | 0.00 %                      | 0.01 %                     | 0.00 %                       | 99.99 %                     |            |
| 8.000  | 3.91                | 0.00 %                      | 0.01 %                     | 0.00 %                       | 99.99 %                     |            |
| 9.000  | 3.91                | 0.00 %                      | 0.01 %                     | 0.00 %                       | 99.99 %                     |            |
| 10.000 | 3.91                | 0.00 %                      | 0.01 %                     | 0.00 %                       | 99.99 %                     |            |
| 11.000 | 3.91                | 0.00 %                      | 0.01 %                     | 0.00 %                       | 99.99 %                     |            |
| 12.000 | 3.91                | 0.00 %                      | 0.01 %                     | 0.00 %                       | 99.99 %                     |            |

Sample name: **M12\_octanol**  
 Assay name: **pH-metric high logP**  
 Assay ID: **18C-03014**  
 Filename: **C:\Sirius\_T3\Mehtap\20180302\_exp29\_logP\_T3-2\18C-03014\_M12\_octanol\_pH-metric high logP.t3r**

Experiment start time: **3/3/2018 6:11:21 PM**  
 Analyst: **Pion**  
 Instrument ID: **T312060**

## Graphs

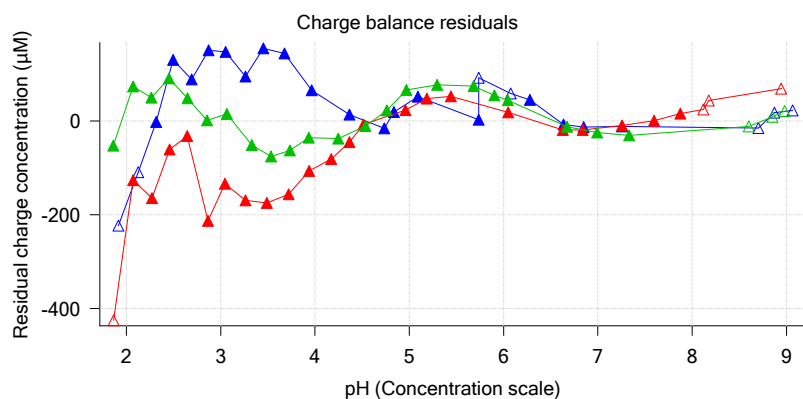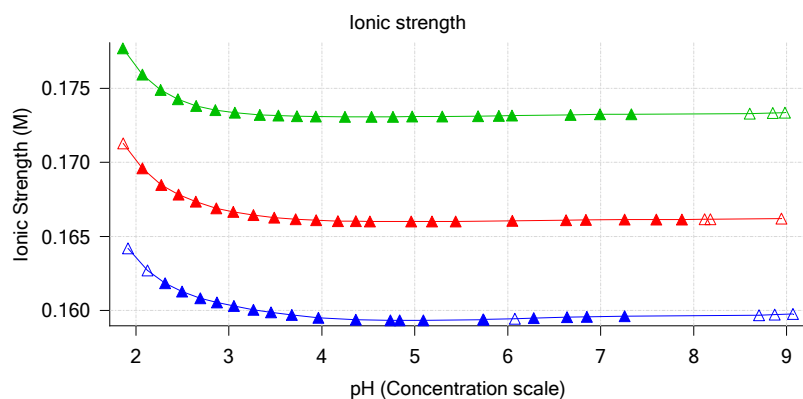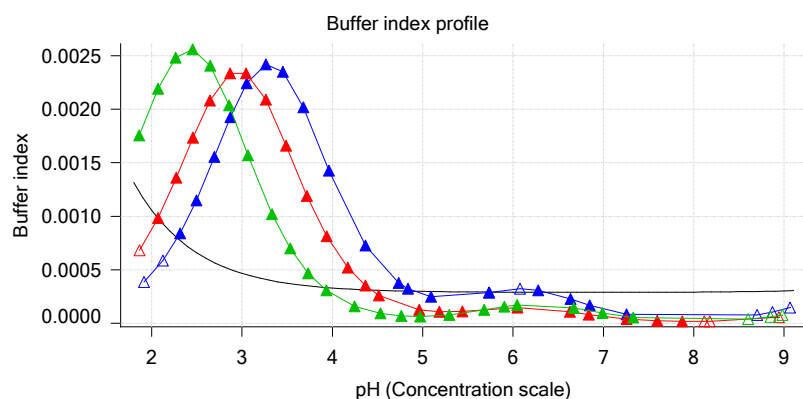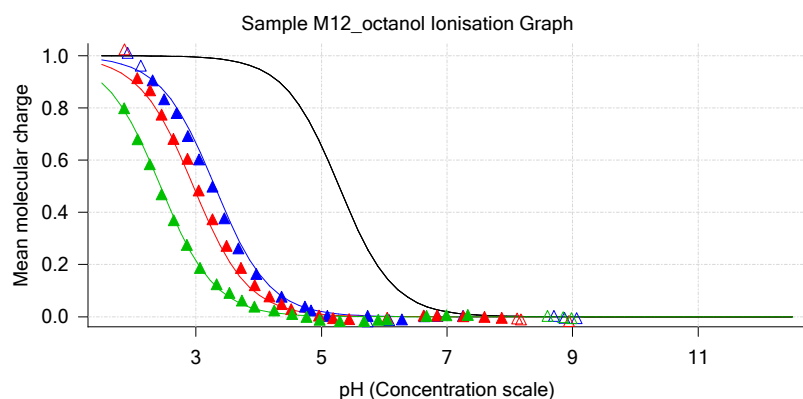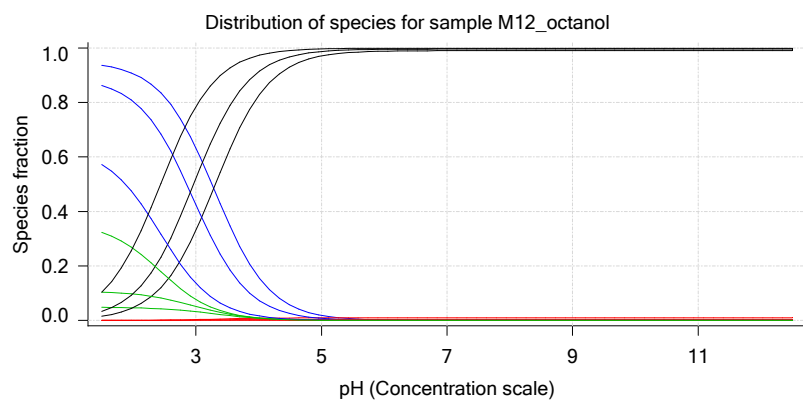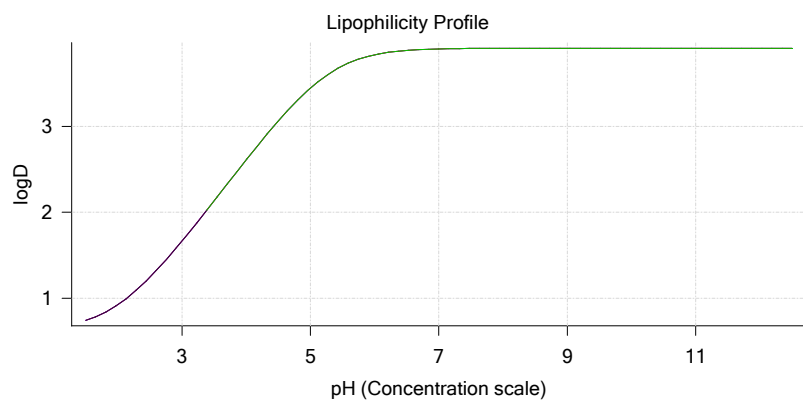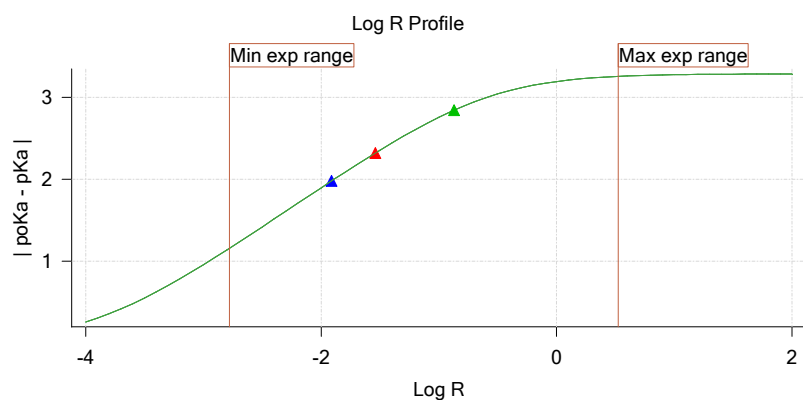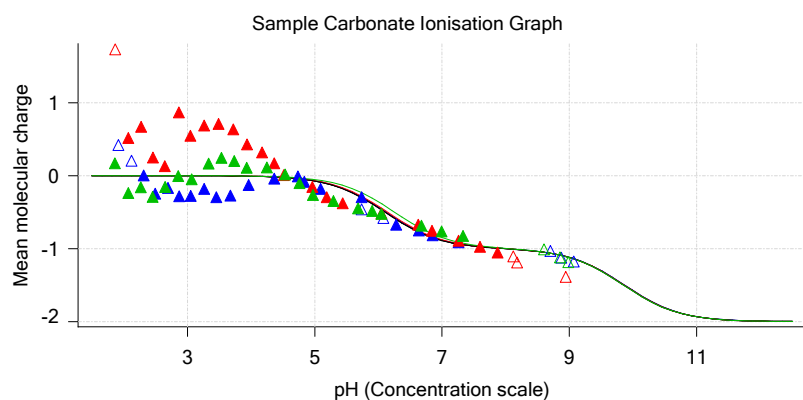

Sample name: **M12\_octanol**  
 Assay name: **pH-metric high logP**  
 Assay ID: **18C-03014**  
 Filename: **C:\Sirius\_T3\Mehtap\20180302\_exp29\_logP\_T3-2\18C-03014\_M12\_octanol\_pH-metric high logP.t3r**

Experiment start time: **3/3/2018 6:11:21 PM**  
 Analyst: **Pion**  
 Instrument ID: **T312060**

## Graphs (continued)

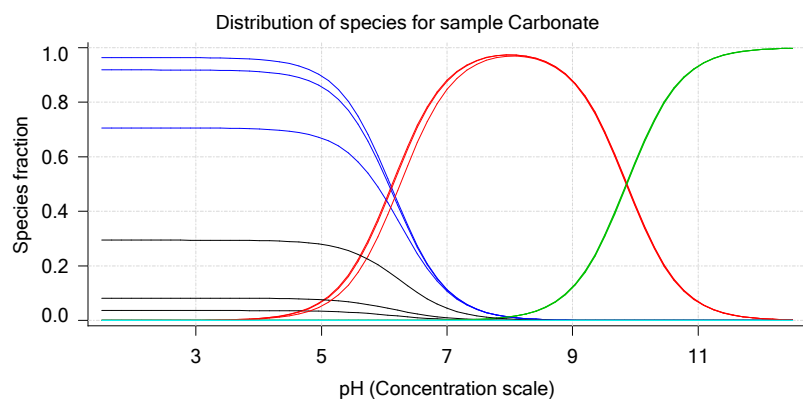

Sample name: **M12\_octanol**  
 Assay name: **pH-metric high logP**  
 Assay ID: **18C-03014**  
 Filename: **C:\Sirius\_T3\Mehtap\20180302\_exp29\_logP\_T3-2\18C-03014\_M12\_octanol\_pH-metric high logP.t3r**

Experiment start time: **3/3/2018 6:11:21 PM**  
 Analyst: **Pion**  
 Instrument ID: **T312060**

## pH-metric high logP Titration 1 of 3 18C-03014 Points 1 to 25

### Overall results

RMSD 0.070  
 Average ionic strength 0.160 M  
 Average temperature 24.9°C  
 Partition ratio 0.0123 : 1  
 Analyte concentration range 4301.0 µM to 4446.8 µM  
 Total points considered 18 of 25

### Warnings and errors

Errors None  
 Warnings Excessive carbonate concentration present  
 Excessive acidity error present

### Four-Plus parameters

Alpha 0.111 3/3/2018 6:11:21 PM C:\Sirius\_T3\HCl18C02.t3r  
 S 0.9988 3/3/2018 6:11:21 PM C:\Sirius\_T3\HCl18C02.t3r  
 jH 1.0 3/3/2018 6:11:21 PM C:\Sirius\_T3\HCl18C02.t3r  
 jOH -0.8 3/3/2018 6:11:21 PM C:\Sirius\_T3\HCl18C02.t3r

### Titrants

0.50 M HCl 0.999058 3/3/2018 6:11:21 PM C:\Sirius\_T3\HCl18C02.t3r  
 0.50 M KOH 0.999845 3/3/2018 6:11:21 PM C:\Sirius\_T3\KOH18B27.t3r

### Sample

M12\_octanol concentration factor 0.960  
 M12\_octanol stoichiometry 1.000  
 Chloride stoichiometry 1.000  
 Base pKa 1 5.28  
 logP (XH +) 0.88  
 logP (neutral X) 3.99

### Sample graphs

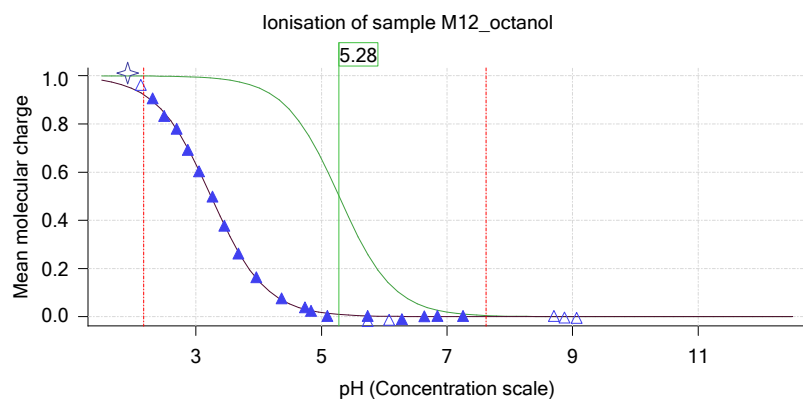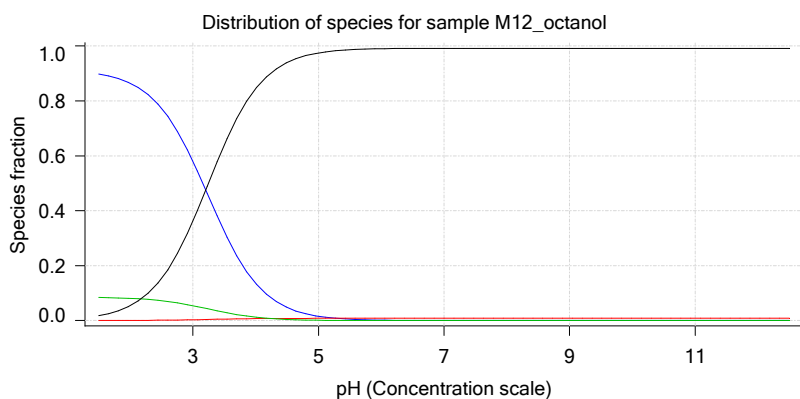

Sample name: **M12\_octanol**  
Assay name: **pH-metric high logP**  
Assay ID: **18C-03014**  
Filename: **C:\Sirius\_T3\Mehtap\20180302\_exp29\_logP\_T3-2\18C-03014\_M12\_octanol\_pH-metric high logP.t3r**

Experiment start time: **3/3/2018 6:11:21 PM**  
Analyst: **Pion**  
Instrument ID: **T312060**

## Sample graphs (continued)

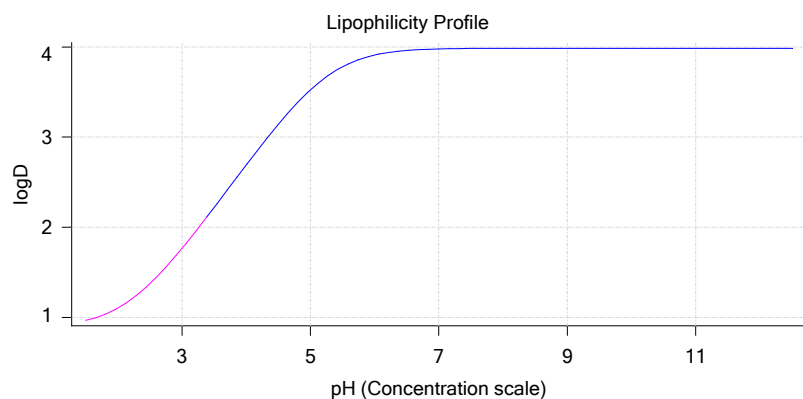

## Sample logD and percent species

| pH     | M12_octanol<br>logD | M12_octanol<br>M12_octanolH | M12_octanol<br>M12_octanol | M12_octanol<br>M12_octanolH* | M12_octanol<br>M12_octanol* | Comment    |
|--------|---------------------|-----------------------------|----------------------------|------------------------------|-----------------------------|------------|
| 1.000  | 0.91                | 90.92 %                     | 0.00 %                     | 8.51 %                       | 0.57 %                      | Stomach pH |
| 1.200  | 0.93                | 90.62 %                     | 0.01 %                     | 8.48 %                       | 0.90 %                      |            |
| 2.000  | 1.10                | 86.47 %                     | 0.05 %                     | 8.09 %                       | 5.39 %                      |            |
| 3.000  | 1.76                | 58.05 %                     | 0.30 %                     | 5.43 %                       | 36.21 %                     |            |
| 4.000  | 2.69                | 13.54 %                     | 0.71 %                     | 1.27 %                       | 84.48 %                     |            |
| 5.000  | 3.52                | 1.56 %                      | 0.82 %                     | 0.15 %                       | 97.47 %                     | Blood pH   |
| 6.000  | 3.91                | 0.16 %                      | 0.83 %                     | 0.01 %                       | 98.99 %                     |            |
| 6.500  | 3.96                | 0.05 %                      | 0.83 %                     | 0.00 %                       | 99.11 %                     |            |
| 7.000  | 3.98                | 0.02 %                      | 0.83 %                     | 0.00 %                       | 99.15 %                     |            |
| 7.400  | 3.98                | 0.01 %                      | 0.83 %                     | 0.00 %                       | 99.16 %                     |            |
| 8.000  | 3.99                | 0.00 %                      | 0.83 %                     | 0.00 %                       | 99.16 %                     |            |
| 9.000  | 3.99                | 0.00 %                      | 0.83 %                     | 0.00 %                       | 99.17 %                     |            |
| 10.000 | 3.99                | 0.00 %                      | 0.83 %                     | 0.00 %                       | 99.17 %                     |            |
| 11.000 | 3.99                | 0.00 %                      | 0.83 %                     | 0.00 %                       | 99.17 %                     |            |
| 12.000 | 3.99                | 0.00 %                      | 0.83 %                     | 0.00 %                       | 99.17 %                     |            |

## Carbonate and acidity

Carbonate 0.533 mM  
Acidity error -1.774 mM

## Other graphs

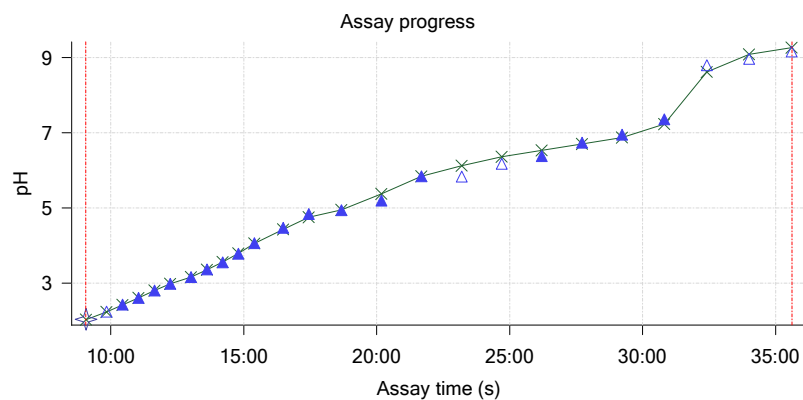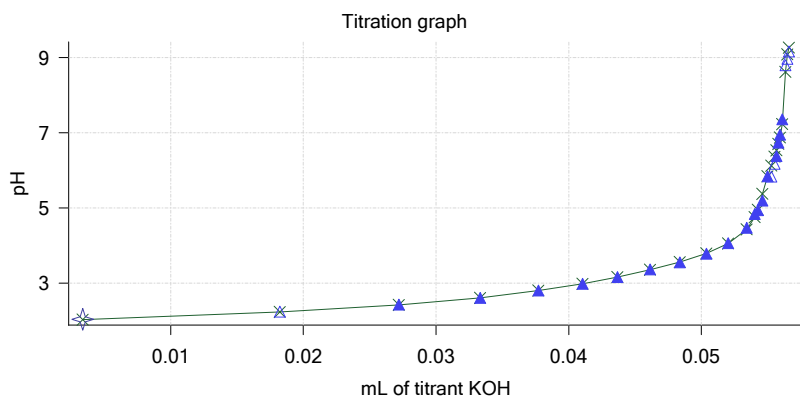

Sample name: **M12\_octanol**  
 Assay name: **pH-metric high logP**  
 Assay ID: **18C-03014**  
 Filename: **C:\Sirius\_T3\Mehtap\20180302\_exp29\_logP\_T3-2\18C-03014\_M12\_octanol\_pH-metric high logP.t3r**

Experiment start time: **3/3/2018 6:11:21 PM**  
 Analyst: **Pion**  
 Instrument ID: **T312060**

## Other graphs (continued)

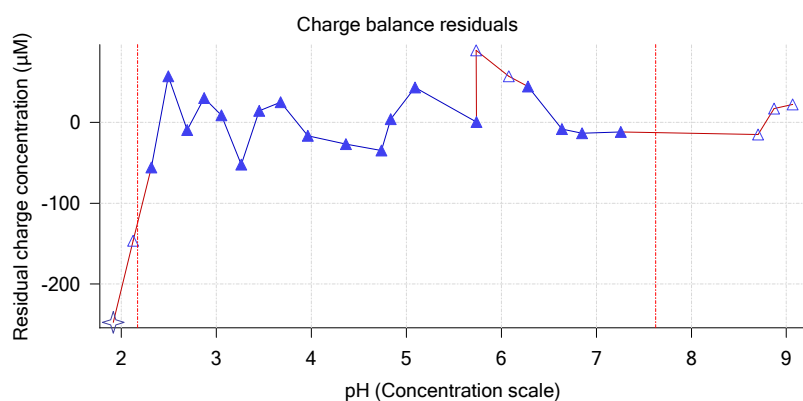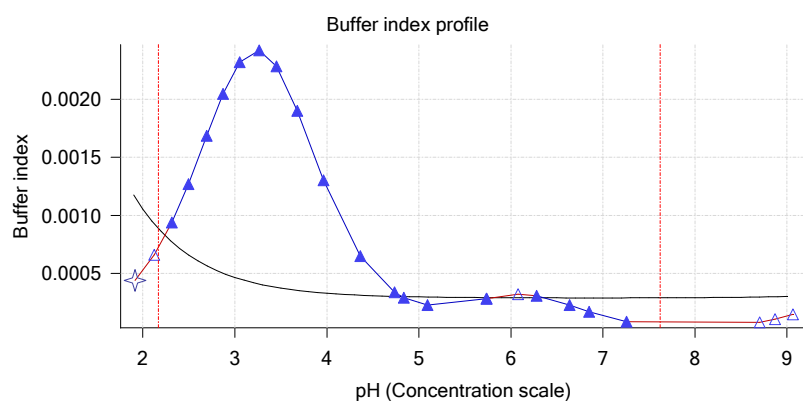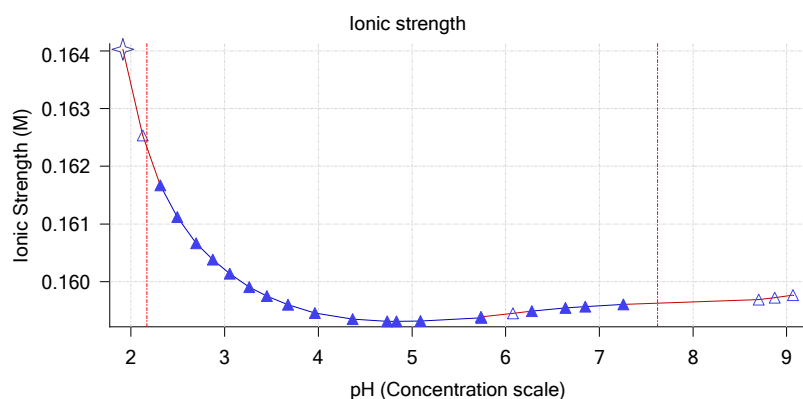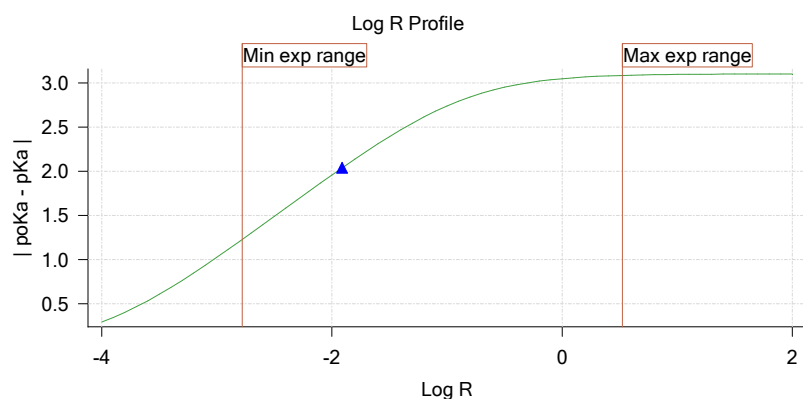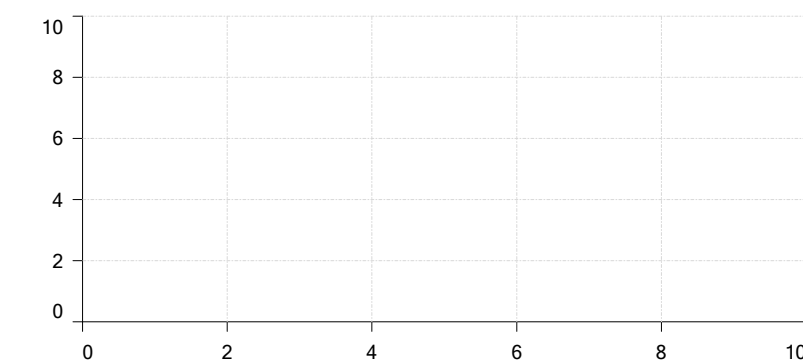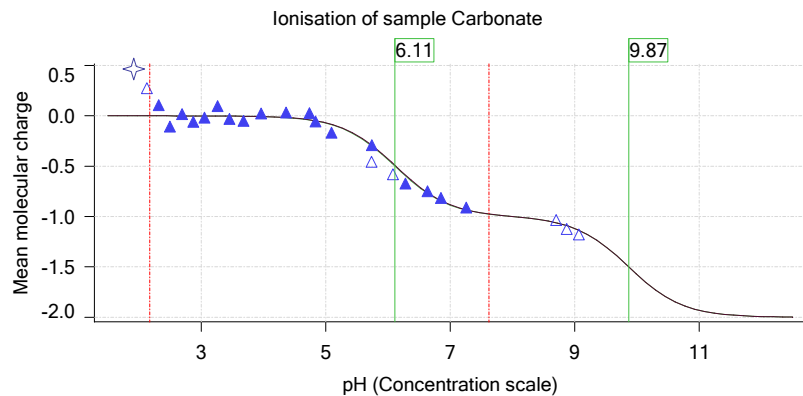

Sample name: **M12\_octanol**  
 Assay name: **pH-metric high logP**  
 Assay ID: **18C-03014**  
 Filename: **C:\Sirius\_T3\Mehtap\20180302\_exp29\_logP\_T3-2\18C-03014\_M12\_octanol\_pH-metric high logP.t3r**

Experiment start time: **3/3/2018 6:11:21 PM**  
 Analyst: **Pion**  
 Instrument ID: **T312060**

## pH-metric high logP Titration 2 of 3 18C-03014 Points 26 to 51

### Overall results

RMSD 0.236  
 Average ionic strength 0.166 M  
 Average temperature 25.0°C  
 Partition ratio 0.0288 : 1  
 Analyte concentration range 3930.3 µM to 4070.1 µM  
 Total points considered 22 of 26

### Warnings and errors

Errors None  
 Warnings Excessive acidity error present

### Four-Plus parameters

Alpha 0.111 3/3/2018 6:11:21 PM C:\Sirius\_T3\HCl18C02.t3r  
 S 0.9988 3/3/2018 6:11:21 PM C:\Sirius\_T3\HCl18C02.t3r  
 jH 1.0 3/3/2018 6:11:21 PM C:\Sirius\_T3\HCl18C02.t3r  
 jOH -0.8 3/3/2018 6:11:21 PM C:\Sirius\_T3\HCl18C02.t3r

### Titrants

0.50 M HCl 0.999058 3/3/2018 6:11:21 PM C:\Sirius\_T3\HCl18C02.t3r  
 0.50 M KOH 0.999845 3/3/2018 6:11:21 PM C:\Sirius\_T3\KOH18B27.t3r

### Sample

M12\_octanol concentration factor 1.007  
 M12\_octanol stoichiometry 1.000  
 Chloride stoichiometry 1.000  
 Base pKa 1 5.28  
 logP (XH +) 1.02  
 logP (neutral X) 3.90

### Sample graphs

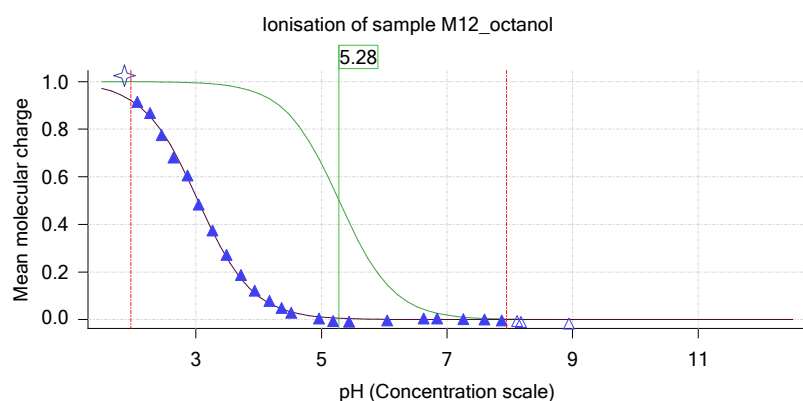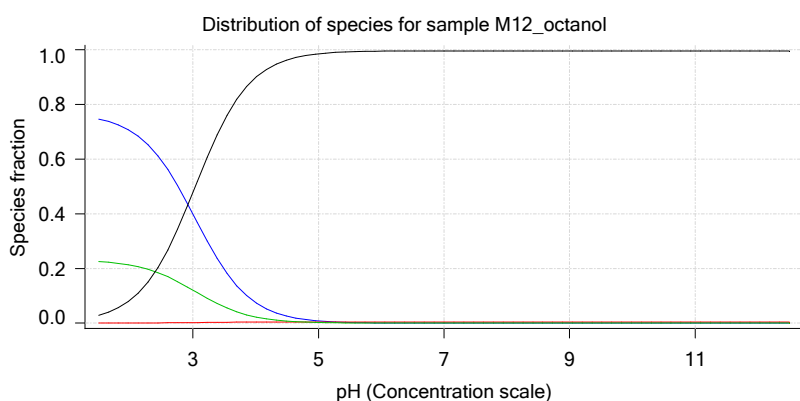

Sample name: **M12\_octanol**  
Assay name: **pH-metric high logP**  
Assay ID: **18C-03014**  
Filename: **C:\Sirius\_T3\Mehtap\20180302\_exp29\_logP\_T3-2\18C-03014\_M12\_octanol\_pH-metric high logP.t3r**

Experiment start time: **3/3/2018 6:11:21 PM**  
Analyst: **Pion**  
Instrument ID: **T312060**

## Sample graphs (continued)

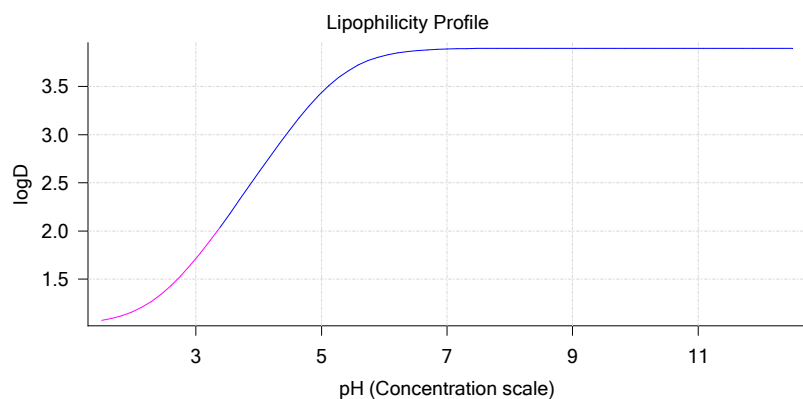

## Sample logD and percent species

| pH     | M12_octanol<br>logD | M12_octanol<br>M12_octanolH | M12_octanol<br>M12_octanol | M12_octanol<br>M12_octanolH* | M12_octanol<br>M12_octanol* | Comment    |
|--------|---------------------|-----------------------------|----------------------------|------------------------------|-----------------------------|------------|
| 1.000  | 1.04                | 76.11 %                     | 0.00 %                     | 22.98 %                      | 0.91 %                      | Stomach pH |
| 1.200  | 1.05                | 75.71 %                     | 0.01 %                     | 22.85 %                      | 1.43 %                      |            |
| 2.000  | 1.16                | 70.33 %                     | 0.04 %                     | 21.23 %                      | 8.40 %                      |            |
| 3.000  | 1.71                | 39.98 %                     | 0.21 %                     | 12.07 %                      | 47.74 %                     |            |
| 4.000  | 2.61                | 7.52 %                      | 0.39 %                     | 2.27 %                       | 89.81 %                     |            |
| 5.000  | 3.44                | 0.82 %                      | 0.43 %                     | 0.25 %                       | 98.49 %                     |            |
| 6.000  | 3.82                | 0.08 %                      | 0.44 %                     | 0.03 %                       | 99.45 %                     | Blood pH   |
| 6.500  | 3.87                | 0.03 %                      | 0.44 %                     | 0.01 %                       | 99.53 %                     |            |
| 7.000  | 3.89                | 0.01 %                      | 0.44 %                     | 0.00 %                       | 99.55 %                     |            |
| 7.400  | 3.89                | 0.00 %                      | 0.44 %                     | 0.00 %                       | 99.56 %                     |            |
| 8.000  | 3.90                | 0.00 %                      | 0.44 %                     | 0.00 %                       | 99.56 %                     |            |
| 9.000  | 3.90                | 0.00 %                      | 0.44 %                     | 0.00 %                       | 99.56 %                     |            |
| 10.000 | 3.90                | 0.00 %                      | 0.44 %                     | 0.00 %                       | 99.56 %                     |            |
| 11.000 | 3.90                | 0.00 %                      | 0.44 %                     | 0.00 %                       | 99.56 %                     |            |
| 12.000 | 3.90                | 0.00 %                      | 0.44 %                     | 0.00 %                       | 99.56 %                     |            |

## Carbonate and acidity

Carbonate 0.246 mM  
Acidity error -1.882 mM

## Other graphs

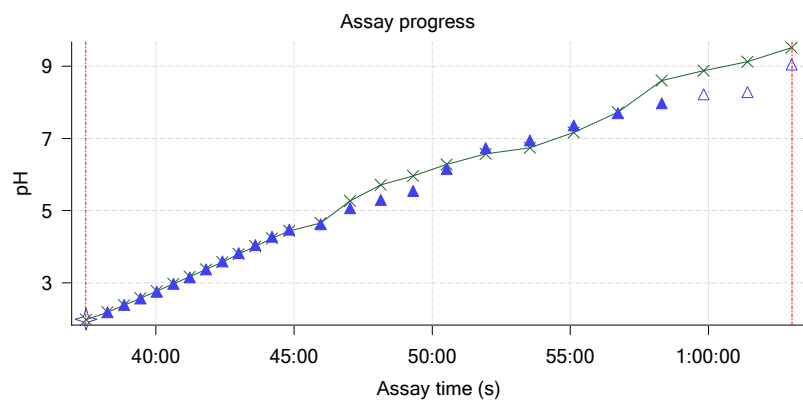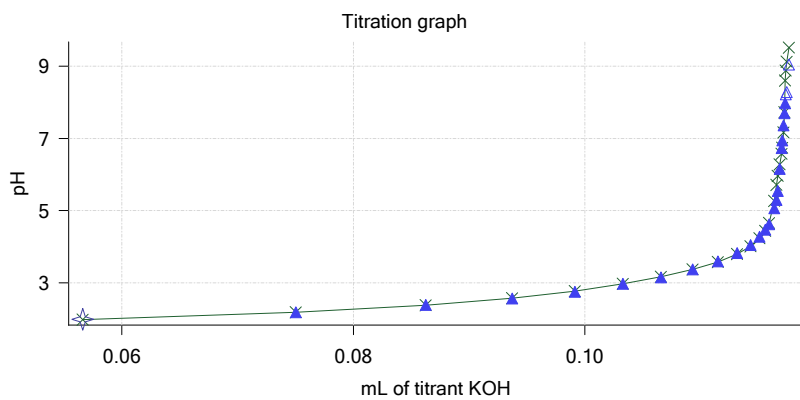



Sample name: **M12\_octanol**  
 Assay name: **pH-metric high logP**  
 Assay ID: **18C-03014**  
 Filename: **C:\Sirius\_T3\Mehtap\20180302\_exp29\_logP\_T3-2\18C-03014\_M12\_octanol\_pH-metric high logP.t3r**

Experiment start time: **3/3/2018 6:11:21 PM**  
 Analyst: **Pion**  
 Instrument ID: **T312060**

## Other graphs (continued)

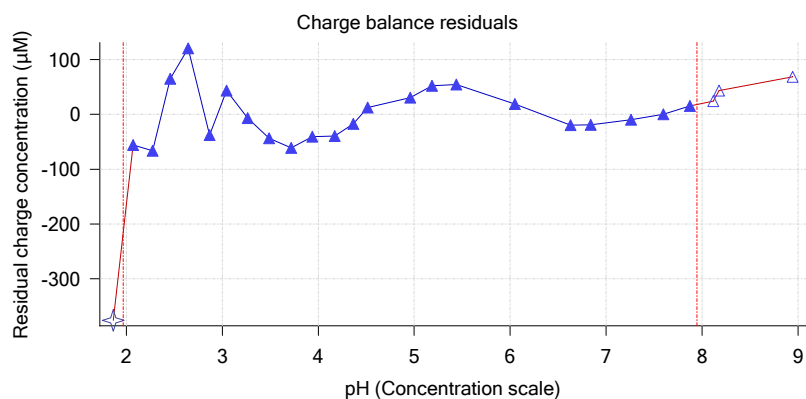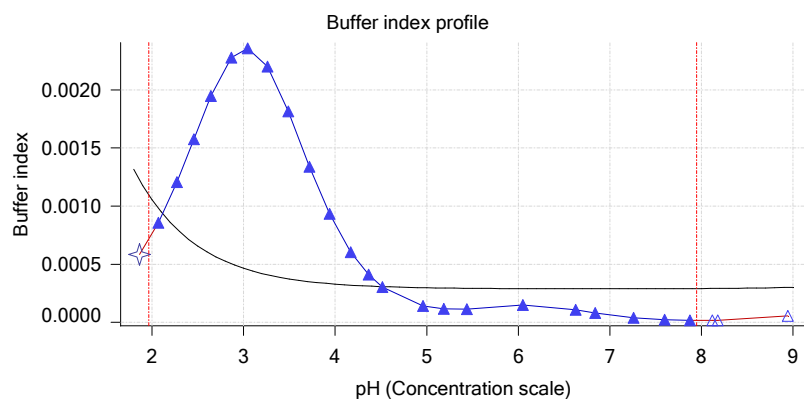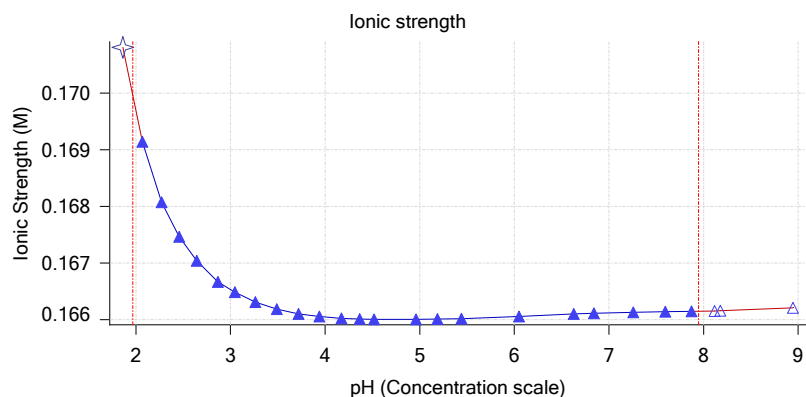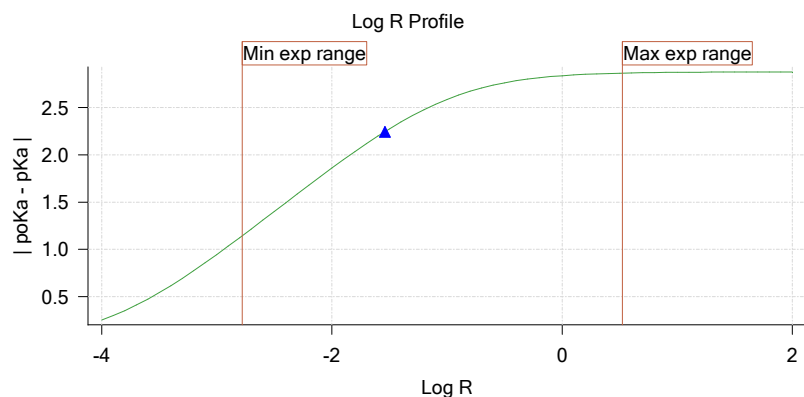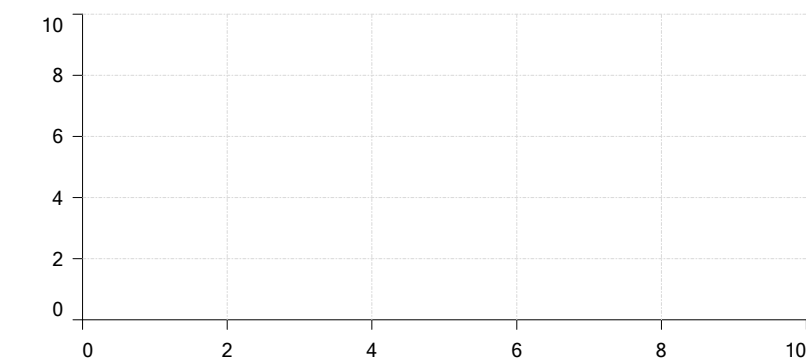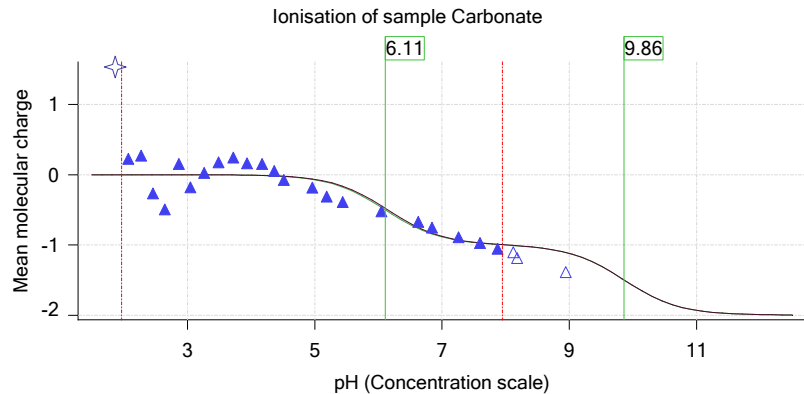

Sample name: **M12\_octanol**  
 Assay name: **pH-metric high logP**  
 Assay ID: **18C-03014**  
 Filename: **C:\Sirius\_T3\Mehtap\20180302\_exp29\_logP\_T3-2\18C-03014\_M12\_octanol\_pH-metric high logP.t3r**

Experiment start time: **3/3/2018 6:11:21 PM**  
 Analyst: **Pion**  
 Instrument ID: **T312060**

pH-metric high logP Titration 3 of 3 18C-03014 Points 52 to 76

## Overall results

RMSD 0.325  
 Average ionic strength 0.174 M  
 Average temperature 25.0°C  
 Partition ratio 0.1350 : 1  
 Analyte concentration range 3312.8 µM to 3415.8 µM  
 Total points considered 22 of 25

## Warnings and errors

Errors None  
 Warnings Excessive acidity error present

## Four-Plus parameters

Alpha 0.111 3/3/2018 6:11:21 PM C:\Sirius\_T3\HCl18C02.t3r  
 S 0.9988 3/3/2018 6:11:21 PM C:\Sirius\_T3\HCl18C02.t3r  
 jH 1.0 3/3/2018 6:11:21 PM C:\Sirius\_T3\HCl18C02.t3r  
 jOH -0.8 3/3/2018 6:11:21 PM C:\Sirius\_T3\HCl18C02.t3r

## Titrants

0.50 M HCl 0.999058 3/3/2018 6:11:21 PM C:\Sirius\_T3\HCl18C02.t3r  
 0.50 M KOH 0.999845 3/3/2018 6:11:21 PM C:\Sirius\_T3\KOH18B27.t3r

## Sample

M12\_octanol concentration factor 1.171  
 M12\_octanol stoichiometry 1.000  
 Chloride stoichiometry 1.000  
 Base pKa 1 5.28  
 logP (XH +) 1.02  
 logP (neutral X) 4.11

## Sample graphs

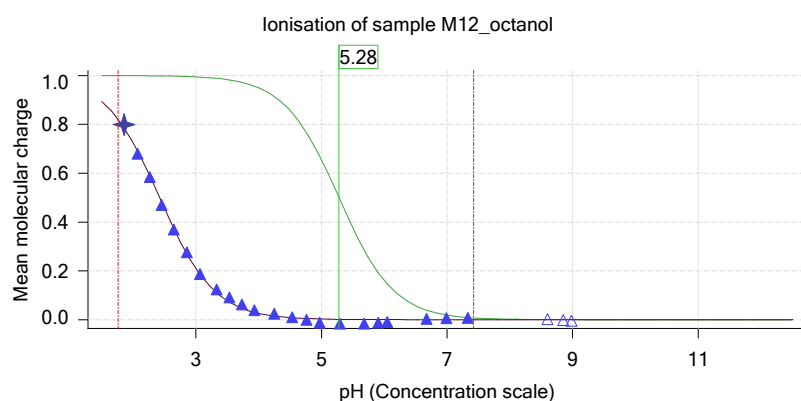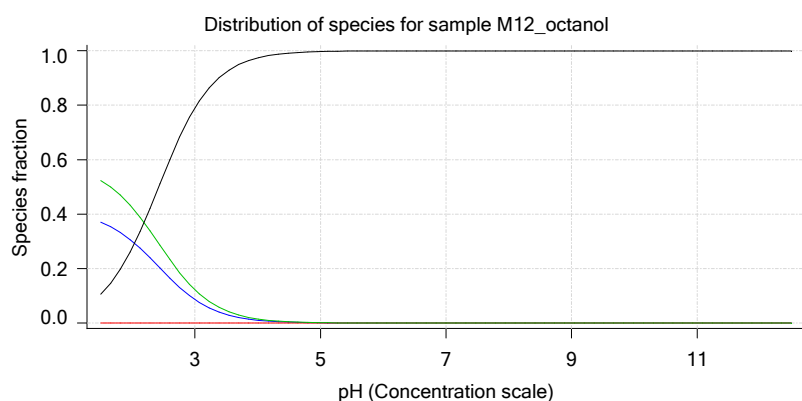

Sample name: **M12\_octanol**  
Assay name: **pH-metric high logP**  
Assay ID: **18C-03014**  
Filename: **C:\Sirius\_T3\Mehtap\20180302\_exp29\_logP\_T3-2\18C-03014\_M12\_octanol\_pH-metric high logP.t3r**

Experiment start time: **3/3/2018 6:11:21 PM**  
Analyst: **Pion**  
Instrument ID: **T312060**

## Sample graphs (continued)

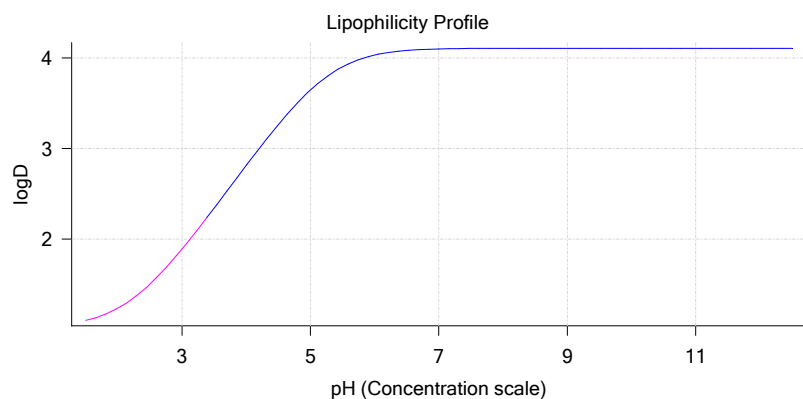

## Sample logD and percent species

| pH     | M12_octanol<br>logD | M12_octanol<br>M12_octanolH | M12_octanol<br>M12_octanol | M12_octanol<br>M12_octanolH* | M12_octanol<br>M12_octanol* | Comment    |
|--------|---------------------|-----------------------------|----------------------------|------------------------------|-----------------------------|------------|
| 1.000  | 1.05                | 39.92 %                     | 0.00 %                     | 56.44 %                      | 3.63 %                      | Stomach pH |
| 1.200  | 1.06                | 39.09 %                     | 0.00 %                     | 55.27 %                      | 5.64 %                      |            |
| 2.000  | 1.24                | 30.08 %                     | 0.02 %                     | 42.52 %                      | 27.38 %                     |            |
| 3.000  | 1.89                | 8.68 %                      | 0.05 %                     | 12.27 %                      | 79.01 %                     |            |
| 4.000  | 2.81                | 1.07 %                      | 0.06 %                     | 1.51 %                       | 97.36 %                     |            |
| 5.000  | 3.65                | 0.11 %                      | 0.06 %                     | 0.15 %                       | 99.68 %                     | Blood pH   |
| 6.000  | 4.03                | 0.01 %                      | 0.06 %                     | 0.02 %                       | 99.92 %                     |            |
| 6.500  | 4.08                | 0.00 %                      | 0.06 %                     | 0.00 %                       | 99.93 %                     |            |
| 7.000  | 4.10                | 0.00 %                      | 0.06 %                     | 0.00 %                       | 99.94 %                     |            |
| 7.400  | 4.11                | 0.00 %                      | 0.06 %                     | 0.00 %                       | 99.94 %                     |            |
| 8.000  | 4.11                | 0.00 %                      | 0.06 %                     | 0.00 %                       | 99.94 %                     |            |
| 9.000  | 4.11                | 0.00 %                      | 0.06 %                     | 0.00 %                       | 99.94 %                     |            |
| 10.000 | 4.11                | 0.00 %                      | 0.06 %                     | 0.00 %                       | 99.94 %                     |            |
| 11.000 | 4.11                | 0.00 %                      | 0.06 %                     | 0.00 %                       | 99.94 %                     |            |
| 12.000 | 4.11                | 0.00 %                      | 0.06 %                     | 0.00 %                       | 99.94 %                     |            |

## Carbonate and acidity

Carbonate 0.309 mM  
Acidity error -3.499 mM

## Other graphs

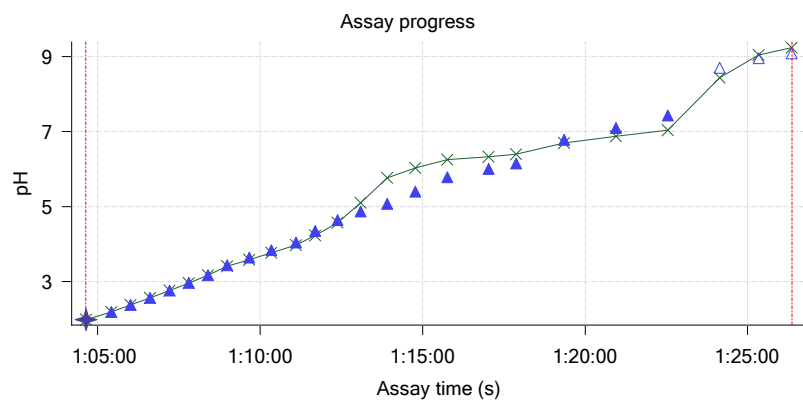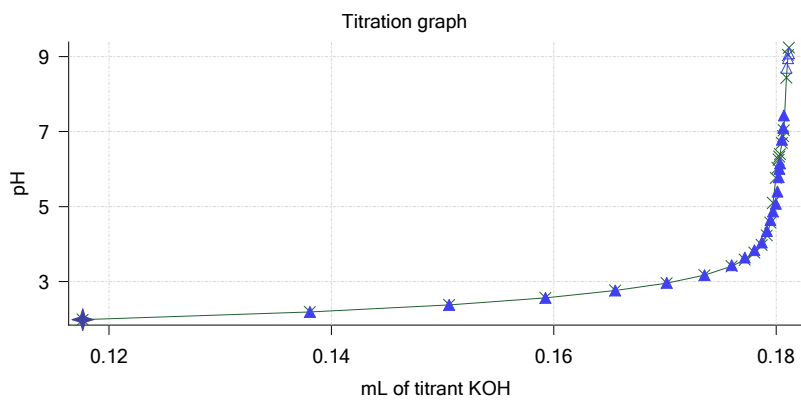

Sample name: **M12\_octanol**  
 Assay name: **pH-metric high logP**  
 Assay ID: **18C-03014**  
 Filename: **C:\Sirius\_T3\Mehtap\20180302\_exp29\_logP\_T3-2\18C-03014\_M12\_octanol\_pH-metric high logP.t3r**

Experiment start time: **3/3/2018 6:11:21 PM**  
 Analyst: **Pion**  
 Instrument ID: **T312060**

## Other graphs (continued)

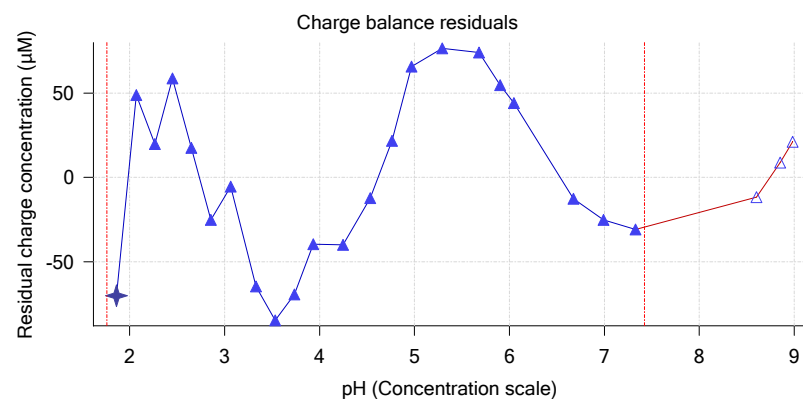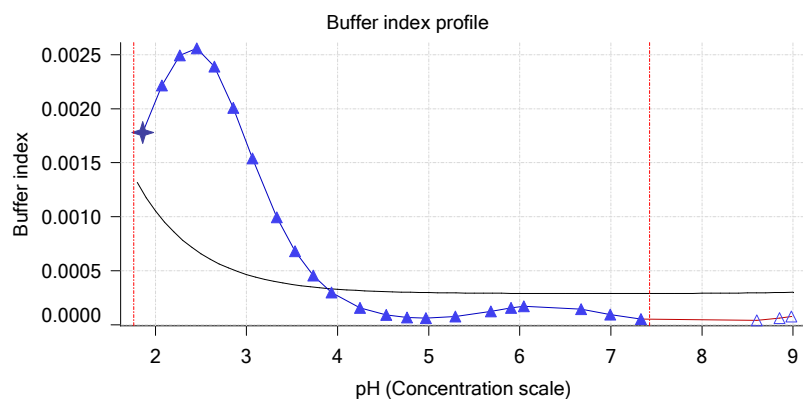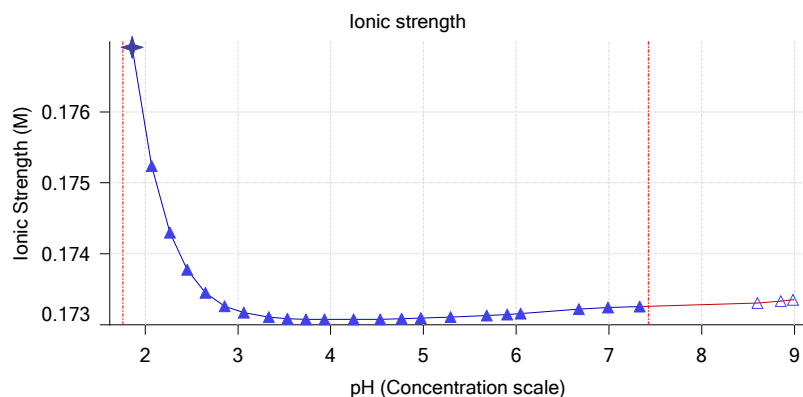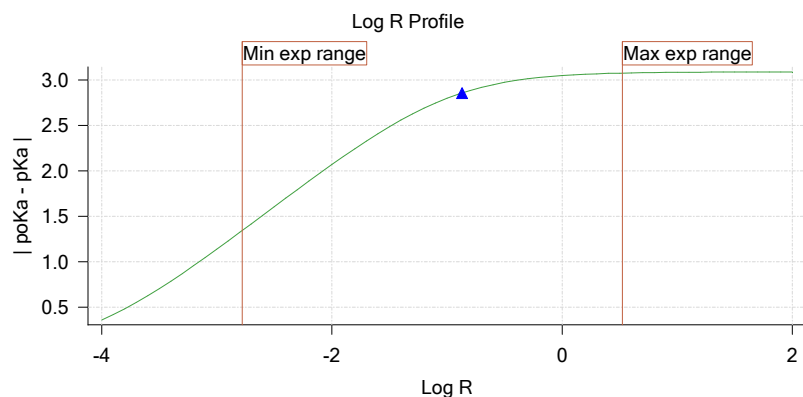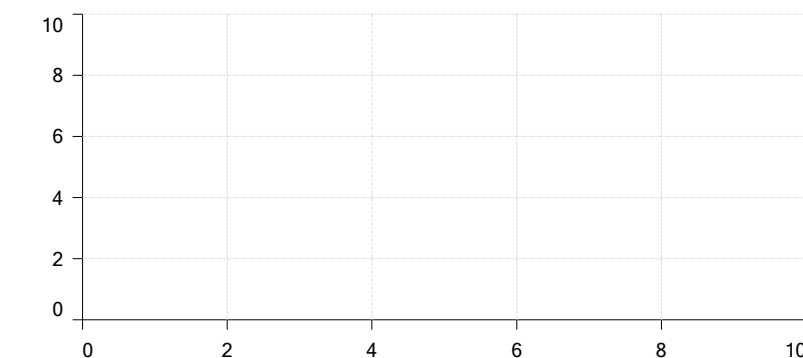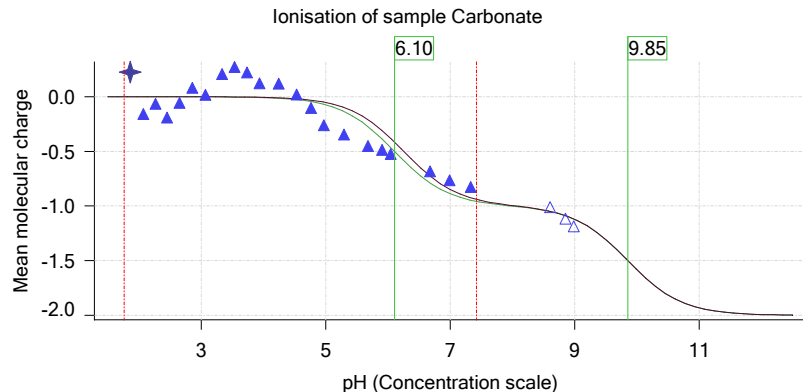

Sample name: **M12\_octanol**  
 Assay name: **pH-metric high logP**  
 Assay ID: **18C-03014**  
 Filename: **C:\Sirius\_T3\Mehtap\20180302\_exp29\_logP\_T3-2\18C-03014\_M12\_octanol\_pH-metric high logP.t3r**

Experiment start time: **3/3/2018 6:11:21 PM**  
 Analyst: **Pion**  
 Instrument ID: **T312060**

## Assay Model

| Settings                          | Value        | Date/Time changed    | Imported from           |
|-----------------------------------|--------------|----------------------|-------------------------|
| Sample name                       | M12_octanol  | 2/28/2018 2:58:36 PM | User entered value      |
| Sample by                         | Weight       |                      | Default value           |
| Sample weight                     | 0.002040 g   | 3/2/2018 5:10:25 PM  | User entered value      |
| Formula weight                    | 292.16 g/mol | 2/28/2018 2:58:36 PM | User entered value      |
| Solubility                        | Unknown      |                      | Default value           |
| Molecular weight                  | 255.70       | 2/28/2018 2:58:36 PM | User entered value      |
| Individual pKa ionic environments | No           |                      | Default value           |
| Number of pKas                    | 1            | 2/28/2018 2:58:36 PM | User entered value      |
| Sample is a                       | Base         | 2/28/2018 2:58:36 PM | User entered value      |
| pKa 1                             | 5.28         | 2/28/2018 2:58:36 PM | User entered value      |
| logp (XH +)                       | 1.02         | 3/2/2018 3:44:28 PM  | User entered value      |
| logP (neutral X)                  | 3.79         | 3/2/2018 3:44:35 PM  | User entered value      |
| Stoichiometry                     | 1.00000      |                      | Default value           |
| Aprotic counterion name           | Chloride     |                      | From standards.xml file |
| Stoichiometry                     | 1.00         |                      | From standards.xml file |
| Charge per counterion             | -1           |                      | From standards.xml file |

## Events

| Time    | Event             | Water      | Acid       | Base       | Octanol    | pH    | dpH/dt   | pH R-squared | pH SD   | dpH/dt time         |
|---------|-------------------|------------|------------|------------|------------|-------|----------|--------------|---------|---------------------|
| 5:59.7  | Initial pH = 3.54 |            |            |            |            |       |          |              |         |                     |
| 9:04.2  | Data point 1      | 1.50000 mL | 0.04685 mL | 0.00336 mL | 0.01999 mL | 2.035 | -0.01024 | 0.61219      | 0.00065 | 10.0 s              |
| 9:50.4  | Data point 2      | 1.50000 mL | 0.04685 mL | 0.01823 mL | 0.01999 mL | 2.240 | -0.00195 | 0.36606      | 0.00016 | 10.5 s              |
| 10:26.5 | Data point 3      | 1.50000 mL | 0.04685 mL | 0.02721 mL | 0.01999 mL | 2.427 | -0.00750 | 0.72499      | 0.00043 | 10.5 s              |
| 11:02.6 | Data point 4      | 1.50000 mL | 0.04685 mL | 0.03333 mL | 0.01999 mL | 2.606 | -0.00567 | 0.86217      | 0.00030 | 10.5 s              |
| 11:38.7 | Data point 5      | 1.50000 mL | 0.04685 mL | 0.03772 mL | 0.01999 mL | 2.803 | -0.01366 | 0.90570      | 0.00071 | 10.0 s              |
| 12:14.2 | Data point 6      | 1.50000 mL | 0.04685 mL | 0.04104 mL | 0.01999 mL | 2.980 | -0.01014 | 0.26097      | 0.00098 | 11.0 s              |
| 13:01.1 | Data point 7      | 1.50000 mL | 0.04685 mL | 0.04367 mL | 0.01999 mL | 3.161 | -0.00882 | 0.80998      | 0.00048 | 10.5 s              |
| 13:37.0 | Data point 8      | 1.50000 mL | 0.04685 mL | 0.04614 mL | 0.01999 mL | 3.370 | -0.00523 | 0.34459      | 0.00044 | 10.0 s              |
| 14:12.5 | Data point 9      | 1.50000 mL | 0.04685 mL | 0.04838 mL | 0.01999 mL | 3.558 | -0.00999 | 0.44733      | 0.00074 | 10.0 s              |
| 14:48.0 | Data point 10     | 1.50000 mL | 0.04685 mL | 0.05038 mL | 0.01999 mL | 3.784 | -0.01707 | 0.81320      | 0.00094 | 10.5 s              |
| 15:24.0 | Data point 11     | 1.50000 mL | 0.04685 mL | 0.05202 mL | 0.01999 mL | 4.069 | -0.01895 | 0.92370      | 0.00097 | 29.5 s              |
| 16:29.4 | Data point 12     | 1.50000 mL | 0.04685 mL | 0.05341 mL | 0.01999 mL | 4.470 | -0.01716 | 0.79592      | 0.00095 | 22.0 s              |
| 17:27.1 | Data point 13     | 1.50000 mL | 0.04685 mL | 0.05402 mL | 0.01999 mL | 4.841 | -0.01868 | 0.91616      | 0.00096 | 47.5 s              |
| 18:40.1 | Data point 14     | 1.50000 mL | 0.04685 mL | 0.05426 mL | 0.01999 mL | 4.941 | -0.02276 | 0.93191      | 0.00116 | Timed out at 59.5 s |
| 20:10.6 | Data point 15     | 1.50000 mL | 0.04685 mL | 0.05461 mL | 0.01999 mL | 5.196 | -0.04657 | 0.99269      | 0.00231 | Timed out at 59.5 s |
| 21:41.2 | Data point 16     | 1.50000 mL | 0.04685 mL | 0.05499 mL | 0.01999 mL | 5.842 | -0.13692 | 0.98959      | 0.00680 | Timed out at 59.5 s |
| 23:11.7 | Data point 17     | 1.50000 mL | 0.04685 mL | 0.05527 mL | 0.01999 mL | 5.839 | -0.10548 | 0.98431      | 0.00525 | Timed out at 59.5 s |
| 24:42.2 | Data point 18     | 1.50000 mL | 0.04685 mL | 0.05550 mL | 0.01999 mL | 6.181 | -0.07455 | 0.99489      | 0.00369 | Timed out at 59.5 s |
| 26:12.7 | Data point 19     | 1.50000 mL | 0.04685 mL | 0.05567 mL | 0.01999 mL | 6.383 | -0.02576 | 0.98099      | 0.00128 | Timed out at 59.5 s |
| 27:43.2 | Data point 20     | 1.50000 mL | 0.04685 mL | 0.05581 mL | 0.01999 mL | 6.739 | -0.03694 | 0.97684      | 0.00185 | Timed out at 59.5 s |
| 29:13.6 | Data point 21     | 1.50000 mL | 0.04685 mL | 0.05593 mL | 0.01999 mL | 6.952 | -0.03900 | 0.97414      | 0.00195 | Timed out at 59.5 s |
| 30:49.3 | Data point 22     | 1.50000 mL | 0.04685 mL | 0.05609 mL | 0.01999 mL | 7.359 | -0.06446 | 0.99560      | 0.00319 | Timed out at 59.5 s |
| 32:25.0 | Data point 23     | 1.50000 mL | 0.04685 mL | 0.05633 mL | 0.01999 mL | 8.802 | -0.02839 | 0.97337      | 0.00142 | Timed out at 59.5 s |
| 34:00.7 | Data point 24     | 1.50000 mL | 0.04685 mL | 0.05649 mL | 0.01999 mL | 8.971 | -0.03345 | 0.98026      | 0.00167 | Timed out at 59.5 s |
| 35:36.4 | Data point 25     | 1.50000 mL | 0.04685 mL | 0.05661 mL | 0.01999 mL | 9.166 | -0.01865 | 0.93346      | 0.00095 | 48.0 s              |

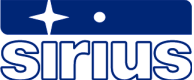

## Assay Events

Sample name: **M12\_octanol**  
Assay name: **pH-metric high logP**  
Assay ID: **18C-03014**  
Filename: **C:\Sirius\_T3\Mehtap\20180302\_exp29\_logP\_T3-2\18C-03014\_M12\_octanol\_pH-metric high logP.t3r**

Experiment start time: **3/3/2018 6:11:21 PM**  
Analyst: **Pion**  
Instrument ID: **T312060**

## Events (continued)

| Time      | Event         | Water      | Acid       | Base       | Octanol    | pH    | dpH/dt   | pH R-squared | pH SD   | dpH/dt time         |
|-----------|---------------|------------|------------|------------|------------|-------|----------|--------------|---------|---------------------|
| 37:28.6   | Data point 26 | 1.50000 mL | 0.10894 mL | 0.05661 mL | 0.05000 mL | 1.986 | -0.01183 | 0.86781      | 0.00063 | 10.0 s              |
| 38:14.8   | Data point 27 | 1.50000 mL | 0.10894 mL | 0.07502 mL | 0.05000 mL | 2.187 | -0.01196 | 0.55172      | 0.00080 | 10.5 s              |
| 38:51.0   | Data point 28 | 1.50000 mL | 0.10894 mL | 0.08624 mL | 0.05000 mL | 2.386 | -0.00645 | 0.60653      | 0.00041 | 10.0 s              |
| 39:26.5   | Data point 29 | 1.50000 mL | 0.10894 mL | 0.09372 mL | 0.05000 mL | 2.568 | -0.00151 | 0.03213      | 0.00042 | 10.0 s              |
| 40:02.1   | Data point 30 | 1.50000 mL | 0.10894 mL | 0.09913 mL | 0.05000 mL | 2.753 | -0.00324 | 0.58318      | 0.00021 | 10.5 s              |
| 40:38.2   | Data point 31 | 1.50000 mL | 0.10894 mL | 0.10329 mL | 0.05000 mL | 2.974 | -0.00350 | 0.62117      | 0.00022 | 10.0 s              |
| 41:13.7   | Data point 32 | 1.50000 mL | 0.10894 mL | 0.10656 mL | 0.05000 mL | 3.153 | -0.00315 | 0.45340      | 0.00023 | 10.0 s              |
| 41:49.2   | Data point 33 | 1.50000 mL | 0.10894 mL | 0.10931 mL | 0.05000 mL | 3.370 | -0.00431 | 0.37822      | 0.00035 | 10.0 s              |
| 42:24.7   | Data point 34 | 1.50000 mL | 0.10894 mL | 0.11150 mL | 0.05000 mL | 3.595 | -0.01024 | 0.34800      | 0.00086 | 10.0 s              |
| 43:00.1   | Data point 35 | 1.50000 mL | 0.10894 mL | 0.11315 mL | 0.05000 mL | 3.826 | -0.01287 | 0.75168      | 0.00073 | 10.5 s              |
| 43:36.1   | Data point 36 | 1.50000 mL | 0.10894 mL | 0.11432 mL | 0.05000 mL | 4.044 | -0.01264 | 0.72037      | 0.00074 | 11.0 s              |
| 44:12.5   | Data point 37 | 1.50000 mL | 0.10894 mL | 0.11510 mL | 0.05000 mL | 4.277 | -0.00961 | 0.25227      | 0.00094 | 12.0 s              |
| 44:49.9   | Data point 38 | 1.50000 mL | 0.10894 mL | 0.11559 mL | 0.05000 mL | 4.471 | -0.01870 | 0.92262      | 0.00096 | 42.5 s              |
| 45:57.9   | Data point 39 | 1.50000 mL | 0.10894 mL | 0.11592 mL | 0.05000 mL | 4.621 | -0.01913 | 0.96775      | 0.00096 | 33.0 s              |
| 47:01.5   | Data point 40 | 1.50000 mL | 0.10894 mL | 0.11637 mL | 0.05000 mL | 5.064 | -0.01981 | 0.97178      | 0.00099 | 36.5 s              |
| 48:08.6   | Data point 41 | 1.50000 mL | 0.10894 mL | 0.11656 mL | 0.05000 mL | 5.290 | -0.01849 | 0.90940      | 0.00096 | 39.5 s              |
| 49:18.8   | Data point 42 | 1.50000 mL | 0.10894 mL | 0.11668 mL | 0.05000 mL | 5.544 | -0.01813 | 0.90749      | 0.00094 | 42.5 s              |
| 50:31.9   | Data point 43 | 1.50000 mL | 0.10894 mL | 0.11684 mL | 0.05000 mL | 6.152 | -0.01812 | 0.90297      | 0.00094 | 54.0 s              |
| 51:56.5   | Data point 44 | 1.50000 mL | 0.10894 mL | 0.11698 mL | 0.05000 mL | 6.731 | -0.03629 | 0.94871      | 0.00184 | Timed out at 59.5 s |
| 53:32.0   | Data point 45 | 1.50000 mL | 0.10894 mL | 0.11705 mL | 0.05000 mL | 6.942 | -0.03907 | 0.98089      | 0.00195 | Timed out at 59.5 s |
| 55:07.6   | Data point 46 | 1.50000 mL | 0.10894 mL | 0.11717 mL | 0.05000 mL | 7.360 | -0.05485 | 0.98317      | 0.00273 | Timed out at 59.5 s |
| 56:43.2   | Data point 47 | 1.50000 mL | 0.10894 mL | 0.11724 mL | 0.05000 mL | 7.698 | -0.06448 | 0.99495      | 0.00319 | Timed out at 59.5 s |
| 58:18.8   | Data point 48 | 1.50000 mL | 0.10894 mL | 0.11731 mL | 0.05000 mL | 7.975 | -0.06889 | 0.99504      | 0.00341 | Timed out at 59.5 s |
| 59:49.3   | Data point 49 | 1.50000 mL | 0.10894 mL | 0.11736 mL | 0.05000 mL | 8.218 | -0.05194 | 0.98871      | 0.00258 | Timed out at 59.5 s |
| 1:01:24.9 | Data point 50 | 1.50000 mL | 0.10894 mL | 0.11743 mL | 0.05000 mL | 8.279 | -0.03256 | 0.93039      | 0.00167 | Timed out at 59.5 s |
| 1:03:00.6 | Data point 51 | 1.50000 mL | 0.10894 mL | 0.11764 mL | 0.05000 mL | 9.044 | -0.01889 | 0.94983      | 0.00096 | 35.0 s              |
| 1:04:38.7 | Data point 52 | 1.50000 mL | 0.17653 mL | 0.11764 mL | 0.25000 mL | 1.983 | -0.01328 | 0.50845      | 0.00092 | 10.0 s              |
| 1:05:25.0 | Data point 53 | 1.50000 mL | 0.17653 mL | 0.13808 mL | 0.25000 mL | 2.188 | -0.00421 | 0.56558      | 0.00028 | 10.0 s              |
| 1:06:00.8 | Data point 54 | 1.50000 mL | 0.17653 mL | 0.15059 mL | 0.25000 mL | 2.379 | -0.01117 | 0.72575      | 0.00065 | 10.0 s              |
| 1:06:36.4 | Data point 55 | 1.50000 mL | 0.17653 mL | 0.15924 mL | 0.25000 mL | 2.563 | 0.00955  | 0.39409      | 0.00075 | 10.5 s              |
| 1:07:12.5 | Data point 56 | 1.50000 mL | 0.17653 mL | 0.16552 mL | 0.25000 mL | 2.758 | -0.00090 | 0.01671      | 0.00034 | 10.0 s              |
| 1:07:48.0 | Data point 57 | 1.50000 mL | 0.17653 mL | 0.17016 mL | 0.25000 mL | 2.964 | -0.00646 | 0.68297      | 0.00039 | 10.0 s              |
| 1:08:23.5 | Data point 58 | 1.50000 mL | 0.17653 mL | 0.17354 mL | 0.25000 mL | 3.172 | -0.01240 | 0.57154      | 0.00081 | 10.0 s              |
| 1:08:59.1 | Data point 59 | 1.50000 mL | 0.17653 mL | 0.17601 mL | 0.25000 mL | 3.439 | -0.00851 | 0.81815      | 0.00046 | 10.0 s              |
| 1:09:39.7 | Data point 60 | 1.50000 mL | 0.17653 mL | 0.17719 mL | 0.25000 mL | 3.639 | -0.00768 | 0.92817      | 0.00039 | 10.0 s              |
| 1:10:20.4 | Data point 61 | 1.50000 mL | 0.17653 mL | 0.17806 mL | 0.25000 mL | 3.840 | -0.01302 | 0.73901      | 0.00075 | 10.0 s              |
| 1:11:06.2 | Data point 62 | 1.50000 mL | 0.17653 mL | 0.17869 mL | 0.25000 mL | 4.040 | -0.01483 | 0.68740      | 0.00088 | 10.0 s              |
| 1:11:41.6 | Data point 63 | 1.50000 mL | 0.17653 mL | 0.17916 mL | 0.25000 mL | 4.352 | -0.01359 | 0.79722      | 0.00075 | 11.0 s              |
| 1:12:23.2 | Data point 64 | 1.50000 mL | 0.17653 mL | 0.17949 mL | 0.25000 mL | 4.639 | -0.01394 | 0.58554      | 0.00090 | 12.0 s              |
| 1:13:05.6 | Data point 65 | 1.50000 mL | 0.17653 mL | 0.17973 mL | 0.25000 mL | 4.868 | -0.01439 | 0.70067      | 0.00085 | 13.0 s              |
| 1:13:54.3 | Data point 66 | 1.50000 mL | 0.17653 mL | 0.17996 mL | 0.25000 mL | 5.075 | -0.01857 | 0.88631      | 0.00097 | 16.5 s              |
| 1:14:46.4 | Data point 67 | 1.50000 mL | 0.17653 mL | 0.18010 mL | 0.25000 mL | 5.398 | -0.01592 | 0.73444      | 0.00092 | 28.5 s              |
| 1:15:45.5 | Data point 68 | 1.50000 mL | 0.17653 mL | 0.18024 mL | 0.25000 mL | 5.785 | -0.01894 | 0.91475      | 0.00098 | 46.0 s              |
| 1:17:02.1 | Data point 69 | 1.50000 mL | 0.17653 mL | 0.18029 mL | 0.25000 mL | 6.007 | -0.01848 | 0.84150      | 0.00100 | 25.0 s              |
| 1:17:52.5 | Data point 70 | 1.50000 mL | 0.17653 mL | 0.18034 mL | 0.25000 mL | 6.149 | -0.01829 | 0.90450      | 0.00095 | 53.0 s              |
| 1:19:21.4 | Data point 71 | 1.50000 mL | 0.17653 mL | 0.18053 mL | 0.25000 mL | 6.777 | -0.04095 | 0.98006      | 0.00204 | Timed out at 59.5 s |
| 1:20:57.0 | Data point 72 | 1.50000 mL | 0.17653 mL | 0.18062 mL | 0.25000 mL | 7.093 | -0.04542 | 0.98750      | 0.00225 | Timed out at 59.5 s |

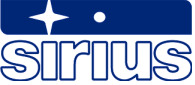

# Assay Events

Sample name: **M12\_octanol**  
Assay name: **pH-metric high logP**  
Assay ID: **18C-03014**  
Filename: **C:\Sirius\_T3\Mehtap\20180302\_exp29\_logP\_T3-2\18C-03014\_M12\_octanol\_pH-metric high logP.t3r**

Experiment start time: **3/3/2018 6:11:21 PM**  
Analyst: **Pion**  
Instrument ID: **T312060**

## Events (continued)

| Time      | Event         | Water      | Acid       | Base       | Octanol    | pH    | dpH/dt   | pH R-squared | pH SD   | dpH/dt time         |
|-----------|---------------|------------|------------|------------|------------|-------|----------|--------------|---------|---------------------|
| 1:22:32.6 | Data point 73 | 1.50000 mL | 0.17653 mL | 0.18069 mL | 0.25000 mL | 7.432 | -0.06081 | 0.97336      | 0.00305 | Timed out at 59.5 s |
| 1:24:08.3 | Data point 74 | 1.50000 mL | 0.17653 mL | 0.18093 mL | 0.25000 mL | 8.702 | -0.01670 | 0.95705      | 0.00084 | 36.5 s              |
| 1:25:20.5 | Data point 75 | 1.50000 mL | 0.17653 mL | 0.18107 mL | 0.25000 mL | 8.952 | -0.01969 | 0.97272      | 0.00099 | 25.0 s              |
| 1:26:21.1 | Data point 76 | 1.50000 mL | 0.17653 mL | 0.18116 mL | 0.25000 mL | 9.082 | -0.01391 | 0.60511      | 0.00088 | 15.0 s              |
| 1:26:45.2 | Assay volumes | 1.50000 mL | 0.17653 mL | 0.18116 mL | 0.25000 mL |       |          |              |         |                     |

Sample name: **M12\_octanol**  
 Assay name: **pH-metric high logP**  
 Assay ID: **18C-03014**  
 Filename: **C:\Sirius\_T3\Mehtap\20180302\_exp29\_logP\_T3-2\18C-03014\_M12\_octanol\_pH-metric high logP.t3r**

Experiment start time: **3/3/2018 6:11:21 PM**  
 Analyst: **Pion**  
 Instrument ID: **T312060**

## Assay Settings

| Setting                             | Value              | Original Value | Date/Time changed | Imported from |
|-------------------------------------|--------------------|----------------|-------------------|---------------|
| <b>General Settings</b>             |                    |                |                   |               |
| Analyst name                        | Pion               |                |                   |               |
| <b>Standard Experiment Settings</b> |                    |                |                   |               |
| Number of titrations                | 3                  |                |                   |               |
| Minimum pH                          | 2.000              |                |                   |               |
| Maximum pH                          | 9.000              |                |                   |               |
| pH step between points of           | 0.200              |                |                   |               |
| Minimum titrant addition            | 0.00002 mL         |                |                   |               |
| Maximum titrant addition            | 0.10000 mL         |                |                   |               |
| Argon flow rate                     | 100%               |                |                   |               |
| Start titration using               | Cautious pH adjust |                |                   |               |
| <b>Advanced General Settings</b>    |                    |                |                   |               |
| Detect turbidity using              | None               |                |                   |               |
| Collect turbidity sensor data       | No                 |                |                   |               |
| Collect UV spectra                  | No                 |                |                   |               |
| Stir after titrant addition for     | 5 seconds          |                |                   |               |
| For titrant addition, stir at       | 10%                |                |                   |               |
| <b>Titration Pre-Dose</b>           |                    |                |                   |               |
| Titration pre-dose                  | None               |                |                   |               |
| <b>Assay Medium</b>                 |                    |                |                   |               |
| ISA water volume                    | 1.50 mL            |                |                   |               |
| Water added                         | Automatic          |                |                   |               |
| Partition solvent type              | Octanol            |                |                   |               |
| Partition volume                    | 0.020 mL           |                |                   |               |
| Partition solvent added             | Automatic          |                |                   |               |
| After partition addition, stir for  | 1 seconds          |                |                   |               |
| <b>Sample Sonication</b>            |                    |                |                   |               |
| Sonicate                            | Yes                |                |                   |               |
| Adjust pH for sonication            | No                 |                |                   |               |
| Sonicate for                        | 120 seconds        |                |                   |               |
| After sonication stir for           | 5 seconds          |                |                   |               |
| <b>Sample Dissolution</b>           |                    |                |                   |               |
| Perform a dissolution stage         | Yes                |                |                   |               |
| Adjust and hold pH for dissolution  | To start pH        |                |                   |               |
| Stir to dissolve for                | 120 seconds        |                |                   |               |
| For dissolution, stir at            | 10%                |                |                   |               |
| <b>Carbonate purge</b>              |                    |                |                   |               |
| Perform a carbonate purge           | No                 |                |                   |               |
| <b>Temperature Control</b>          |                    |                |                   |               |
| Wait for temperature                | Yes                |                |                   |               |
| Required start temperature          | 25.0°C             |                |                   |               |
| Acceptable deviation                | 0.5°C              |                |                   |               |
| Time to wait                        | 60 seconds         |                |                   |               |
| Stir speed of                       | 50%                |                |                   |               |
| <b>Titration 1</b>                  |                    |                |                   |               |
| Titrate from                        | Low to high pH     |                |                   |               |
| Adjust to start pH                  | Yes                |                |                   |               |
| After pH adjust stir for            | 30 seconds         |                |                   |               |
| Stir to allow partitioning for      | 15 seconds         |                |                   |               |
| Stirrer speed for partitioning      | 50%                |                |                   |               |
| <b>Titration 2</b>                  |                    |                |                   |               |
| Titrate from                        | Low to high pH     |                |                   |               |
| Add additional water                | 0.00 mL            |                |                   |               |
| Additional partition solvent volume | 0.030 mL           |                |                   |               |
| Additional partition solvent added  | Automatic          |                |                   |               |
| After pH adjust stir for            | 30 seconds         |                |                   |               |
| Stir to allow partitioning for      | 15 seconds         |                |                   |               |
| Stirrer speed for partitioning      | 55%                |                |                   |               |



Sample name: **M12\_octanol**  
 Assay name: **pH-metric high logP**  
 Assay ID: **18C-03014**  
 Filename: **C:\Sirius\_T3\Mehtap\20180302\_exp29\_logP\_T3-2\18C-03014\_M12\_octanol\_pH-metric high logP.t3r**

Experiment start time: **3/3/2018 6:11:21 PM**  
 Analyst: **Pion**  
 Instrument ID: **T312060**

## Assay Settings (continued)

| Setting                             | Value          | Original Value | Date/Time changed | Imported from |
|-------------------------------------|----------------|----------------|-------------------|---------------|
| <b>Titration 3</b>                  |                |                |                   |               |
| Titrate from                        | Low to high pH |                |                   |               |
| Add additional water                | 0.00 mL        |                |                   |               |
| Additional partition solvent volume | 0.200 mL       |                |                   |               |
| Additional partition solvent added  | Automatic      |                |                   |               |
| After pH adjust stir for            | 30 seconds     |                |                   |               |
| Stir to allow partitioning for      | 15 seconds     |                |                   |               |
| Stirrer speed for partitioning      | 60%            |                |                   |               |
| <b>Data Point Stability</b>         |                |                |                   |               |
| Stir during data point collection   | No             |                |                   |               |
| Delay before data point collection  | 0 seconds      |                |                   |               |
| Number of points to average         | 20 points      |                |                   |               |
| Time interval between points        | 0.50 seconds   |                |                   |               |
| Required maximum standard deviation | 0.00100 dpH/dt |                |                   |               |
| Stability timeout after             | 60 seconds     |                |                   |               |

## Calibration Settings

| Setting                   | Value  | Date/Time changed   | Imported from             |
|---------------------------|--------|---------------------|---------------------------|
| Four-Plus alpha           | 0.111  | 3/3/2018 6:11:21 PM | C:\Sirius_T3\HCl18C02.t3r |
| Four-Plus S               | 0.9988 | 3/3/2018 6:11:21 PM | C:\Sirius_T3\HCl18C02.t3r |
| Four-Plus jH              | 1.0    | 3/3/2018 6:11:21 PM | C:\Sirius_T3\HCl18C02.t3r |
| Four-Plus jOH             | -0.8   | 3/3/2018 6:11:21 PM | C:\Sirius_T3\HCl18C02.t3r |
| Base concentration factor | 1.000  | 3/3/2018 6:11:21 PM | C:\Sirius_T3\KOH18B27.t3r |
| Acid concentration factor | 0.999  | 3/3/2018 6:11:21 PM | C:\Sirius_T3\HCl18C02.t3r |

## Instrument Settings

| Setting              | Value                      | Batch Id    | Install date           |
|----------------------|----------------------------|-------------|------------------------|
| Instrument owner     | Merck                      |             |                        |
| Instrument ID        | T312060                    |             |                        |
| Instrument type      | T3 Simulator               |             |                        |
| Software version     | 1.1.3.0                    |             |                        |
| Dispenser module     |                            | T3DM1200361 | 3/31/2009 5:24:52 AM   |
| Dispenser 0          | Water                      |             | 3/31/2009 5:25:05 AM   |
| Syringe volume       | 2.5 mL                     |             |                        |
| Firmware version     | 1.2.1(r2)                  |             |                        |
| Titrant              | Water (0.15 M KCl)         | 02-06-2018  | 2/27/2018 10:05:59 AM  |
| Dispenser 2          | Acid                       |             | 3/31/2009 5:25:11 AM   |
| Syringe volume       | 0.5 mL                     |             |                        |
| Firmware version     | 1.2.1(r2)                  |             |                        |
| Titrant              | Acid (0.5 M HCl)           | 02-27-2018  | 2/27/2018 10:27:22 AM  |
| Dispenser 1          | Base                       |             | 3/31/2009 5:25:21 AM   |
| Syringe volume       | 0.5 mL                     |             |                        |
| Firmware version     | 1.2.1(r2)                  |             |                        |
| Titrant              | Base (0.5 M KOH)           | 9/22/2017   | 2/27/2018 10:21:22 AM  |
| Dispenser 5          | Cosolvent                  |             | 3/31/2009 5:26:24 AM   |
| Syringe volume       | 2.5 mL                     |             |                        |
| Firmware version     | 1.2.1(r2)                  |             |                        |
| Distribution valve 5 | Distribution Valve         |             | 3/31/2009 5:28:19 AM   |
| Firmware version     | 1.1.3                      |             |                        |
| Port A               | Methanol (80%, 0.15 M KCl) | 09-26-17    | 2/7/2018 9:42:01 AM    |
| Port B               | Cyclohexane                | 11-01-17    | 2/27/2018 10:37:57 AM  |
| Dispenser 3          | Buffer                     |             | 8/3/2010 5:05:16 AM    |
| Syringe volume       | 0.5 mL                     |             |                        |
| Firmware version     | 1.2.1(r2)                  |             |                        |
| Titrant              | Dodecane                   | 2018/01/31  | 2/28/2018 10:18:04 AM  |
| Dispenser 6          | Octanol                    |             | 10/22/2010 10:52:43 AM |

Sample name: **M12\_octanol** Experiment start time: **3/3/2018 6:11:21 PM**  
 Assay name: **pH-metric high logP** Analyst: **Pion**  
 Assay ID: **18C-03014** Instrument ID: **T312060**  
 Filename: **C:\Sirius\_T3\Mehtap\20180302\_exp29\_logP\_T3-2\18C-03014\_M12\_octanol\_pH-metric high logP.t3r**

## Instrument Settings (continued)

| Setting                                   | Value                      | Batch Id    | Install date           |
|-------------------------------------------|----------------------------|-------------|------------------------|
| Syringe volume                            | 0.5 mL                     |             |                        |
| Firmware version                          | 1.2.1(r2)                  |             |                        |
| Titrant                                   | Octanol                    | 01-31-2018  | 2/27/2018 9:59:35 AM   |
| Titration                                 |                            | T3TM1200161 | 3/31/2009 5:24:17 AM   |
| Horizontal axis firmware version          | 1.17 AI1DI2DO2 Stepper 2   |             |                        |
| Vertical axis firmware version            | 1.17 AI1DI2DO2 Stepper 2   |             |                        |
| Chassis I/O firmware version              | 1.11 AI1DI0DO4 Norgren I/O |             |                        |
| Probe I/O firmware version                | 1.1.1                      |             |                        |
| Electrode                                 | T3 Electrode               | T3E0923     | 1/23/2018 2:01:00 PM   |
| E0 calibration                            | +6.33 mV                   |             | 3/3/2018 6:11:49 PM    |
| Filling solution                          | 3M KCl                     | KCL097      | 3/2/2018 9:43:24 AM    |
| Liquids                                   |                            |             |                        |
| Wash 1                                    | 50% IPA:50% Water          |             | 3/2/2018 9:45:12 AM    |
| Wash 2                                    | 0.5% Triton X-100 in H2O   |             | 3/2/2018 9:45:15 AM    |
| Buffer position 1                         | pH7 Wash                   |             | 3/2/2018 9:45:18 AM    |
| Buffer position 2                         | pH 7                       |             | 3/2/2018 9:45:21 AM    |
| Storage position                          |                            |             | 3/2/2018 9:44:44 AM    |
| Wash water                                | 6.6e+003 mL                | 02-27-2018  | 2/27/2018 9:54:39 AM   |
| Waste                                     | 8.9e+003 mL                |             | 11/28/2017 10:36:29 AM |
| Temperature controller                    |                            |             | 8/5/2010 6:35:13 AM    |
| Turbidity detector                        |                            |             | 3/31/2009 5:24:45 AM   |
| Spectrometer                              |                            | 074811      | 11/23/2010 11:22:28 AM |
| Dip probe                                 |                            | 10196       |                        |
| Wavelength coefficient A0                 | 183.333                    |             |                        |
| Wavelength coefficient A1                 | 2.21568                    |             |                        |
| Wavelength coefficient A2                 | -0.000289308               |             |                        |
| Total lamp lit time                       | 120:41:49                  |             | 11/23/2010 11:22:28 AM |
| Calibrated on                             | 2/27/2018 10:40:38 AM      |             |                        |
| Integration time                          | 40                         |             |                        |
| Scans averaged                            | 10                         |             |                        |
| Autoloader                                |                            | T3AL1200345 | 11/10/2015 9:34:13 AM  |
| Left-right axis firmware version          | 1.17 AI1DI2DO2 Stepper 2   |             |                        |
| Front-back axis firmware version          | 1.17 AI1DI2DO2 Stepper 2   |             |                        |
| Vertical axis firmware version            | 1.17 AI1DI2DO2 Stepper 2   |             |                        |
| Chassis I/O firmware version              | 1.11 AI1DI0DO4 Norgren I/O |             |                        |
| Configuration                             |                            |             |                        |
| Alternate titration position              | Titration position         |             |                        |
| Alternate reference position              | Reference position         |             |                        |
| Maximum standard vial volume              | 3.50 mL                    |             |                        |
| Maximum alternate vial volume             | 25.00 mL                   |             |                        |
| Automatic action idle period              | 5 minute(s)                |             |                        |
| Titration tube volume                     | 1.3 mL                     |             |                        |
| Syringe flush count                       | 3.50                       |             |                        |
| Flowing wash pump volume                  | 20.0 mL                    |             |                        |
| Flowing wash stir duration                | 5 s                        |             |                        |
| Flowing wash stir speed                   | 30%                        |             |                        |
| Solvent wash stir duration                | 5 s                        |             |                        |
| Solvent wash stir speed                   | 30%                        |             |                        |
| Surfactant wash stir duration             | 5 s                        |             |                        |
| Surfactant wash stir speed                | 30%                        |             |                        |
| E0 calibration minimum number of points   | 10                         |             |                        |
| E0 calibration maximum standard deviation | 0.01500                    |             |                        |
| E0 calibration timeout period             | 60 s                       |             |                        |
| E0 calibration stir duration              | 5 s                        |             |                        |
| E0 calibration preparation stir speed     | 30%                        |             |                        |
| E0 calibration buffer wash stir duration  | 5 s                        |             |                        |
| E0 calibration buffer wash stir speed     | 30%                        |             |                        |
| E0 calibration reading stir speed         | 0%                         |             |                        |

Sample name: **M12\_octanol** Experiment start time: **3/3/2018 6:11:21 PM**  
 Assay name: **pH-metric high logP** Analyst: **Pion**  
 Assay ID: **18C-03014** Instrument ID: **T312060**  
 Filename: **C:\Sirius\_T3\Mehtap\20180302\_exp29\_logP\_T3-2\18C-03014\_M12\_octanol\_pH-metric high logP.t3r**

## Instrument Settings (continued)

| Setting                                     | Value   | Batch Id | Install date |
|---------------------------------------------|---------|----------|--------------|
| Spectrometer calibration stir duration      | 5 s     |          |              |
| Spectrometer calibration stir speed         | 30%     |          |              |
| Spectrometer calibration wash pump volume   | 20.0 mL |          |              |
| Spectrometer calibration wash stir duration | 5 s     |          |              |
| Spectrometer calibration wash stir speed    | 30%     |          |              |
| Overhead dispense height                    | 10000   |          |              |

## Refinement Settings

| Setting                        | Value    | Default value |
|--------------------------------|----------|---------------|
| Turbidity detection method     | None     | None          |
| Turbidity wavelength to assess | 500.0 nm | 500.0 nm      |
| Turbidity maximum absorbance   | 0.100    | 0.100         |
| Turbidity probe threshold      | 50.00    | 50.00         |

## Experiment Log

[2:37] Air gap created for Water (0.15 M KCl)  
 [2:38] Air gap created for Acid (0.5 M HCl)  
 [2:38] Air gap created for Base (0.5 M KOH)  
 [2:38] Air gap released for Water (0.15 M KCl)  
 [2:42] Titrator arm moved over Titration position  
 [2:42] Titration 1 of 3  
 [2:42] Adding initial titrants  
 [2:42] Automatically add 1.50000 mL of water  
 [3:07] Dispensed 1.500000 mL of Water (0.15 M KCl)  
 [3:11] Titrator arm moved over Drain  
 [5:53] Titrator arm moved to Titration position  
 [5:53] Argon flow rate set to 100  
 [5:53] Stirrer speed set to 10  
 [5:58] Automatically add 0.02000 mL of Octanol  
 [5:58] Dispensed 0.019991 mL of Octanol  
 [5:59] Initial pH = 3.54  
 [5:59] Iterative adjust 3.54 -> 2.00  
 [5:59] pH 3.54 -> 2.00  
 [6:01] Air gap released for Acid (0.5 M HCl)  
 [6:02] Dispensed 0.045296 mL of Acid (0.5 M HCl)  
 [6:07] pH 2.02 -> 2.00  
 [6:07] Dispensed 0.001552 mL of Acid (0.5 M HCl)  
 [6:12] Holding pH 2.00  
 [8:12] Stirrer speed set to 0  
 [8:12] Stirrer speed set to 50  
 [8:12] Iterative adjust 1.97 -> 2.00  
 [8:12] pH 1.97 -> 2.00  
 [8:13] Air gap released for Base (0.5 M KOH)  
 [8:14] Dispensed 0.003363 mL of Base (0.5 M KOH)  
 [9:04] Stirrer speed set to 0  
 [9:14] Datapoint id 1 collected  
 [9:14] Stirrer speed set to 50  
 [9:19] pH 2.04 -> 2.24  
 [9:19] Using cautious pH adjust  
 [9:19] Dispensed 0.007079 mL of Base (0.5 M KOH)  
 [9:24] Stepping pH = 2.12  
 [9:25] Dispensed 0.006444 mL of Base (0.5 M KOH)  
 [9:30] Stepping pH = 2.22  
 [9:30] Dispensed 0.001341 mL of Base (0.5 M KOH)  
 [9:35] Stepping pH = 2.24  
 [9:50] Stirrer speed set to 0  
 [10:01] Datapoint id 2 collected

Sample name: **M12\_octanol**  
Assay name: **pH-metric high logP**  
Assay ID: **18C-03014**  
Filename: **C:\Sirius\_T3\Mehtap\20180302\_exp29\_logP\_T3-2\18C-03014\_M12\_octanol\_pH-metric high logP.t3r**

Experiment start time: **3/3/2018 6:11:21 PM**  
Analyst: **Pion**  
Instrument ID: **T312060**

## Experiment Log (continued)

[10:01] Charge balance equation is out by -4.8%  
[10:01] Stirrer speed set to 50  
[10:06] pH 2.25 -> 2.45  
[10:06] Using charge balance adjust  
[10:06] Dispensed 0.008984 mL of Base (0.5 M KOH)  
[10:26] Stirrer speed set to 0  
[10:37] Datapoint id 3 collected  
[10:37] Charge balance equation is out by -10.3%  
[10:37] Stirrer speed set to 50  
[10:42] pH 2.43 -> 2.63  
[10:42] Using charge balance adjust  
[10:42] Dispensed 0.006115 mL of Base (0.5 M KOH)  
[11:02] Stirrer speed set to 0  
[11:13] Datapoint id 4 collected  
[11:13] Charge balance equation is out by -13.9%  
[11:13] Stirrer speed set to 50  
[11:18] pH 2.61 -> 2.81  
[11:18] Using charge balance adjust  
[11:18] Dispensed 0.004398 mL of Base (0.5 M KOH)  
[11:38] Stirrer speed set to 0  
[11:48] Datapoint id 5 collected  
[11:48] Charge balance equation is out by -4.8%  
[11:48] Stirrer speed set to 50  
[11:54] pH 2.81 -> 3.01  
[11:54] Using charge balance adjust  
[11:54] Dispensed 0.003316 mL of Base (0.5 M KOH)  
[12:14] Stirrer speed set to 0  
[12:25] Datapoint id 6 collected  
[12:25] Charge balance equation is out by -15.2%  
[12:25] Stirrer speed set to 50  
[12:30] pH 2.99 -> 3.19  
[12:30] Using cautious pH adjust  
[12:30] Dispensed 0.001388 mL of Base (0.5 M KOH)  
[12:35] Stepping pH = 3.08  
[12:35] Dispensed 0.000988 mL of Base (0.5 M KOH)  
[12:41] Stepping pH = 3.16  
[12:41] Dispensed 0.000259 mL of Base (0.5 M KOH)  
[12:46] Stepping pH = 3.18  
[13:01] Stirrer speed set to 0  
[13:11] Datapoint id 7 collected  
[13:11] Charge balance equation is out by 4.7%  
[13:11] Stirrer speed set to 50  
[13:16] pH 3.16 -> 3.36  
[13:16] Using charge balance adjust  
[13:17] Dispensed 0.002469 mL of Base (0.5 M KOH)  
[13:37] Stirrer speed set to 0  
[13:47] Datapoint id 8 collected  
[13:47] Charge balance equation is out by 4.1%  
[13:47] Stirrer speed set to 50  
[13:52] pH 3.37 -> 3.57  
[13:52] Using charge balance adjust  
[13:52] Dispensed 0.002234 mL of Base (0.5 M KOH)  
[14:12] Stirrer speed set to 0  
[14:22] Datapoint id 9 collected  
[14:22] Charge balance equation is out by -7.1%  
[14:22] Stirrer speed set to 50  
[14:27] pH 3.56 -> 3.76  
[14:27] Using charge balance adjust  
[14:28] Dispensed 0.001999 mL of Base (0.5 M KOH)

Sample name: **M12\_octanol**  
Assay name: **pH-metric high logP**  
Assay ID: **18C-03014**  
Filename: **C:\Sirius\_T3\Mehtap\20180302\_exp29\_logP\_T3-2\18C-03014\_M12\_octanol\_pH-metric high logP.t3r**

Experiment start time: **3/3/2018 6:11:21 PM**  
Analyst: **Pion**  
Instrument ID: **T312060**

## Experiment Log (continued)

[14:48] Stirrer speed set to 0  
[14:58] Datapoint id 10 collected  
[14:58] Charge balance equation is out by 13.2%  
[14:58] Stirrer speed set to 50  
[15:03] pH 3.78 -> 3.98  
[15:03] Using charge balance adjust  
[15:04] Dispensed 0.001646 mL of Base (0.5 M KOH)  
[15:24] Stirrer speed set to 0  
[15:53] Datapoint id 11 collected  
[15:53] Charge balance equation is out by 42.3%  
[15:53] Stirrer speed set to 50  
[15:58] pH 4.06 -> 4.26  
[15:58] Using cautious pH adjust  
[15:59] Dispensed 0.000588 mL of Base (0.5 M KOH)  
[16:04] Stepping pH = 4.24  
[16:04] Dispensed 0.000047 mL of Base (0.5 M KOH)  
[16:09] Stepping pH = 4.21  
[16:09] Dispensed 0.000753 mL of Base (0.5 M KOH)  
[16:14] Stepping pH = 4.64  
[16:29] Stirrer speed set to 0  
[16:51] Datapoint id 12 collected  
[16:51] Charge balance equation is out by -18.3%  
[16:51] Stirrer speed set to 50  
[16:56] pH 4.49 -> 4.69  
[16:56] Using cautious pH adjust  
[16:56] Dispensed 0.000282 mL of Base (0.5 M KOH)  
[17:01] Stepping pH = 4.67  
[17:01] Dispensed 0.000024 mL of Base (0.5 M KOH)  
[17:07] Stepping pH = 4.64  
[17:07] Dispensed 0.000306 mL of Base (0.5 M KOH)  
[17:12] Stepping pH = 4.98  
[17:27] Stirrer speed set to 0  
[18:14] Datapoint id 13 collected  
[18:14] Charge balance equation is out by -11.2%  
[18:14] Stirrer speed set to 50  
[18:20] pH 4.89 -> 5.09  
[18:20] Using charge balance adjust  
[18:20] Dispensed 0.000235 mL of Base (0.5 M KOH)  
[18:40] Stirrer speed set to 0  
[19:40] Datapoint id 14 collected  
[19:40] Charge balance equation is out by -77.2%  
[19:40] Stirrer speed set to 50  
[19:45] pH 5.03 -> 5.23  
[19:45] Using cautious pH adjust  
[19:45] Dispensed 0.000094 mL of Base (0.5 M KOH)  
[19:50] Stepping pH = 5.04  
[19:50] Dispensed 0.000259 mL of Base (0.5 M KOH)  
[19:55] Stepping pH = 5.67  
[20:10] Stirrer speed set to 0  
[21:10] Datapoint id 15 collected  
[21:10] Charge balance equation is out by -86.8%  
[21:10] Stirrer speed set to 50  
[21:16] pH 5.31 -> 5.51  
[21:16] Using cautious pH adjust  
[21:16] Dispensed 0.000047 mL of Base (0.5 M KOH)  
[21:21] Stepping pH = 5.28  
[21:21] Dispensed 0.000329 mL of Base (0.5 M KOH)  
[21:26] Stepping pH = 6.63  
[21:41] Stirrer speed set to 0

Sample name: **M12\_octanol**  
 Assay name: **pH-metric high logP**  
 Assay ID: **18C-03014**  
 Filename: **C:\Sirius\_T3\Mehtap\20180302\_exp29\_logP\_T3-2\18C-03014\_M12\_octanol\_pH-metric high logP.t3r**

Experiment start time: **3/3/2018 6:11:21 PM**  
 Analyst: **Pion**  
 Instrument ID: **T312060**

## Experiment Log (continued)

[22:41] Datapoint id 16 collected  
 [22:41] Charge balance equation is out by -249.2%  
 [22:41] Stirrer speed set to 50  
 [22:46] pH 5.92 -> 6.12  
 [22:46] Using cautious pH adjust  
 [22:46] Dispensed 0.000024 mL of Base (0.5 M KOH)  
 [22:51] Stepping pH = 5.77  
 [22:51] Dispensed 0.000259 mL of Base (0.5 M KOH)  
 [22:56] Stepping pH = 6.69  
 [23:11] Stirrer speed set to 0  
 [24:11] Datapoint id 17 collected  
 [24:11] Charge balance equation is out by -408.9%  
 [24:11] Stirrer speed set to 50  
 [24:17] pH 5.97 -> 6.17  
 [24:17] Using cautious pH adjust  
 [24:17] Dispensed 0.000024 mL of Base (0.5 M KOH)  
 [24:22] Stepping pH = 5.89  
 [24:22] Dispensed 0.000212 mL of Base (0.5 M KOH)  
 [24:27] Stepping pH = 6.77  
 [24:42] Stirrer speed set to 0  
 [25:42] Datapoint id 18 collected  
 [25:42] Charge balance equation is out by -301.9%  
 [25:42] Stirrer speed set to 50  
 [25:47] pH 6.27 -> 6.47  
 [25:47] Using cautious pH adjust  
 [25:47] Dispensed 0.000024 mL of Base (0.5 M KOH)  
 [25:52] Stepping pH = 6.23  
 [25:52] Dispensed 0.000141 mL of Base (0.5 M KOH)  
 [25:57] Stepping pH = 6.60  
 [26:12] Stirrer speed set to 0  
 [27:12] Datapoint id 19 collected  
 [27:12] Charge balance equation is out by -248.4%  
 [27:13] Stirrer speed set to 50  
 [27:18] pH 6.39 -> 6.59  
 [27:18] Using cautious pH adjust  
 [27:18] Dispensed 0.000024 mL of Base (0.5 M KOH)  
 [27:23] Stepping pH = 6.37  
 [27:23] Dispensed 0.000118 mL of Base (0.5 M KOH)  
 [27:28] Stepping pH = 6.70  
 [27:43] Stirrer speed set to 0  
 [28:43] Datapoint id 20 collected  
 [28:43] Charge balance equation is out by -226.3%  
 [28:43] Stirrer speed set to 50  
 [28:48] pH 6.69 -> 6.89  
 [28:48] Using cautious pH adjust  
 [28:48] Dispensed 0.000024 mL of Base (0.5 M KOH)  
 [28:53] Stepping pH = 6.65  
 [28:53] Dispensed 0.000094 mL of Base (0.5 M KOH)  
 [28:58] Stepping pH = 6.93  
 [29:13] Stirrer speed set to 0  
 [30:13] Datapoint id 21 collected  
 [30:13] Charge balance equation is out by -266.6%  
 [30:13] Stirrer speed set to 50  
 [30:19] pH 6.92 -> 7.12  
 [30:19] Using cautious pH adjust  
 [30:19] Dispensed 0.000024 mL of Base (0.5 M KOH)  
 [30:24] Stepping pH = 6.85  
 [30:24] Dispensed 0.000071 mL of Base (0.5 M KOH)  
 [30:29] Stepping pH = 6.95



Sample name: **M12\_octanol**  
Assay name: **pH-metric high logP**  
Assay ID: **18C-03014**  
Filename: **C:\Sirius\_T3\Mehtap\20180302\_exp29\_logP\_T3-2\18C-03014\_M12\_octanol\_pH-metric high logP.t3r**

Experiment start time: **3/3/2018 6:11:21 PM**  
Analyst: **Pion**  
Instrument ID: **T312060**

## Experiment Log (continued)

[30:29] Dispensed 0.000071 mL of Base (0.5 M KOH)  
[30:34] Stepping pH = 7.36  
[30:49] Stirrer speed set to 0  
[31:49] Datapoint id 22 collected  
[31:49] Charge balance equation is out by -694.1%  
[31:49] Stirrer speed set to 50  
[31:54] pH 7.29 -> 7.49  
[31:54] Using cautious pH adjust  
[31:54] Dispensed 0.000024 mL of Base (0.5 M KOH)  
[31:59] Stepping pH = 7.25  
[31:59] Dispensed 0.000024 mL of Base (0.5 M KOH)  
[32:05] Stepping pH = 7.22  
[32:05] Dispensed 0.000188 mL of Base (0.5 M KOH)  
[32:10] Stepping pH = 8.57  
[32:25] Stirrer speed set to 0  
[33:25] Datapoint id 23 collected  
[33:25] Charge balance equation is out by -2,178.7%  
[33:25] Stirrer speed set to 50  
[33:30] pH 8.80 -> 9.00  
[33:30] Using cautious pH adjust  
[33:30] Dispensed 0.000024 mL of Base (0.5 M KOH)  
[33:35] Stepping pH = 8.79  
[33:35] Dispensed 0.000071 mL of Base (0.5 M KOH)  
[33:40] Stepping pH = 8.89  
[33:40] Dispensed 0.000071 mL of Base (0.5 M KOH)  
[33:45] Stepping pH = 9.02  
[34:00] Stirrer speed set to 0  
[35:00] Datapoint id 24 collected  
[35:01] Charge balance equation is out by -456.4%  
[35:01] Stirrer speed set to 50  
[35:06] pH 8.94 -> 9.05  
[35:06] Using cautious pH adjust  
[35:06] Dispensed 0.000024 mL of Base (0.5 M KOH)  
[35:11] Stepping pH = 8.91  
[35:11] Dispensed 0.000047 mL of Base (0.5 M KOH)  
[35:16] Stepping pH = 8.96  
[35:16] Dispensed 0.000047 mL of Base (0.5 M KOH)  
[35:21] Stepping pH = 9.16  
[35:36] Stirrer speed set to 0  
[36:24] Datapoint id 25 collected  
[36:24] Charge balance equation is out by -631.2%  
[36:24] Titration 2 of 3  
[36:24] Adding initial titrants  
[36:24] Automatically add 0.03000 mL of Octanol  
[36:25] Dispensed 0.030009 mL of Octanol  
[36:25] Stirrer speed set to 10  
[36:26] Stirrer speed set to 55  
[36:26] Iterative adjust 9.17 -> 2.00  
[36:26] pH 9.17 -> 2.00  
[36:28] Dispensed 0.056138 mL of Acid (0.5 M HCl)  
[36:33] pH 2.05 -> 2.00  
[36:33] Dispensed 0.004633 mL of Acid (0.5 M HCl)  
[36:38] pH 2.01 -> 2.00  
[36:38] Dispensed 0.001317 mL of Acid (0.5 M HCl)  
[37:28] Stirrer speed set to 0  
[37:38] Datapoint id 26 collected  
[37:38] Stirrer speed set to 55  
[37:43] pH 1.99 -> 2.19  
[37:43] Using cautious pH adjust

Sample name: **M12\_octanol**  
Assay name: **pH-metric high logP**  
Assay ID: **18C-03014**  
Filename: **C:\Sirius\_T3\Mehtap\20180302\_exp29\_logP\_T3-2\18C-03014\_M12\_octanol\_pH-metric high logP.t3r**

Experiment start time: **3/3/2018 6:11:21 PM**  
Analyst: **Pion**  
Instrument ID: **T312060**

## Experiment Log (continued)

[37:44] Dispensed 0.008725 mL of Base (0.5 M KOH)  
[37:49] Stepping pH = 2.07  
[37:49] Dispensed 0.007079 mL of Base (0.5 M KOH)  
[37:54] Stepping pH = 2.15  
[37:54] Dispensed 0.002611 mL of Base (0.5 M KOH)  
[38:00] Stepping pH = 2.19  
[38:15] Stirrer speed set to 0  
[38:25] Datapoint id 27 collected  
[38:25] Charge balance equation is out by -5.5%  
[38:25] Stirrer speed set to 55  
[38:30] pH 2.19 -> 2.39  
[38:30] Using charge balance adjust  
[38:31] Dispensed 0.011218 mL of Base (0.5 M KOH)  
[38:51] Stirrer speed set to 0  
[39:01] Datapoint id 28 collected  
[39:01] Charge balance equation is out by -2.0%  
[39:01] Stirrer speed set to 55  
[39:06] pH 2.39 -> 2.59  
[39:06] Using charge balance adjust  
[39:06] Dispensed 0.007479 mL of Base (0.5 M KOH)  
[39:26] Stirrer speed set to 0  
[39:36] Datapoint id 29 collected  
[39:36] Charge balance equation is out by -11.7%  
[39:36] Stirrer speed set to 55  
[39:41] pH 2.57 -> 2.77  
[39:41] Using charge balance adjust  
[39:42] Dispensed 0.005409 mL of Base (0.5 M KOH)  
[40:02] Stirrer speed set to 0  
[40:12] Datapoint id 30 collected  
[40:12] Charge balance equation is out by -10.8%  
[40:12] Stirrer speed set to 55  
[40:17] pH 2.76 -> 2.96  
[40:17] Using charge balance adjust  
[40:18] Dispensed 0.004163 mL of Base (0.5 M KOH)  
[40:38] Stirrer speed set to 0  
[40:48] Datapoint id 31 collected  
[40:48] Charge balance equation is out by 7.0%  
[40:48] Stirrer speed set to 55  
[40:53] pH 2.97 -> 3.17  
[40:53] Using charge balance adjust  
[40:53] Dispensed 0.003269 mL of Base (0.5 M KOH)  
[41:13] Stirrer speed set to 0  
[41:24] Datapoint id 32 collected  
[41:24] Charge balance equation is out by -9.7%  
[41:24] Stirrer speed set to 55  
[41:29] pH 3.15 -> 3.35  
[41:29] Using charge balance adjust  
[41:29] Dispensed 0.002752 mL of Base (0.5 M KOH)  
[41:49] Stirrer speed set to 0  
[41:59] Datapoint id 33 collected  
[41:59] Charge balance equation is out by 8.4%  
[41:59] Stirrer speed set to 55  
[42:04] pH 3.37 -> 3.57  
[42:04] Using charge balance adjust  
[42:04] Dispensed 0.002187 mL of Base (0.5 M KOH)  
[42:24] Stirrer speed set to 0  
[42:34] Datapoint id 34 collected  
[42:34] Charge balance equation is out by 10.6%  
[42:34] Stirrer speed set to 55



Sample name: **M12\_octanol**  
Assay name: **pH-metric high logP**  
Assay ID: **18C-03014**  
Filename: **C:\Sirius\_T3\Mehtap\20180302\_exp29\_logP\_T3-2\18C-03014\_M12\_octanol\_pH-metric high logP.t3r**

Experiment start time: **3/3/2018 6:11:21 PM**  
Analyst: **Pion**  
Instrument ID: **T312060**

## Experiment Log (continued)

[42:40] pH 3.60 -> 3.80  
[42:40] Using charge balance adjust  
[42:40] Dispensed 0.001646 mL of Base (0.5 M KOH)  
[43:00] Stirrer speed set to 0  
[43:10] Datapoint id 35 collected  
[43:10] Charge balance equation is out by 11.7%  
[43:10] Stirrer speed set to 55  
[43:16] pH 3.83 -> 4.03  
[43:16] Using charge balance adjust  
[43:16] Dispensed 0.001176 mL of Base (0.5 M KOH)  
[43:36] Stirrer speed set to 0  
[43:47] Datapoint id 36 collected  
[43:47] Charge balance equation is out by 6.6%  
[43:47] Stirrer speed set to 55  
[43:52] pH 4.06 -> 4.26  
[43:52] Using charge balance adjust  
[43:52] Dispensed 0.000776 mL of Base (0.5 M KOH)  
[44:12] Stirrer speed set to 0  
[44:24] Datapoint id 37 collected  
[44:24] Charge balance equation is out by 10.2%  
[44:24] Stirrer speed set to 55  
[44:29] pH 4.29 -> 4.49  
[44:29] Using charge balance adjust  
[44:29] Dispensed 0.000494 mL of Base (0.5 M KOH)  
[44:50] Stirrer speed set to 0  
[45:32] Datapoint id 38 collected  
[45:32] Charge balance equation is out by -11.9%  
[45:32] Stirrer speed set to 55  
[45:37] pH 4.50 -> 4.70  
[45:37] Using charge balance adjust  
[45:37] Dispensed 0.000329 mL of Base (0.5 M KOH)  
[45:58] Stirrer speed set to 0  
[46:31] Datapoint id 39 collected  
[46:31] Charge balance equation is out by -38.3%  
[46:31] Stirrer speed set to 55  
[46:36] pH 4.65 -> 4.85  
[46:36] Using cautious pH adjust  
[46:36] Dispensed 0.000118 mL of Base (0.5 M KOH)  
[46:41] Stepping pH = 4.66  
[46:41] Dispensed 0.000329 mL of Base (0.5 M KOH)  
[46:46] Stepping pH = 5.18  
[47:01] Stirrer speed set to 0  
[47:38] Datapoint id 40 collected  
[47:38] Charge balance equation is out by -91.6%  
[47:38] Stirrer speed set to 55  
[47:43] pH 5.10 -> 5.30  
[47:43] Using cautious pH adjust  
[47:43] Dispensed 0.000047 mL of Base (0.5 M KOH)  
[47:48] Stepping pH = 5.11  
[47:48] Dispensed 0.000141 mL of Base (0.5 M KOH)  
[47:53] Stepping pH = 5.38  
[48:08] Stirrer speed set to 0  
[48:48] Datapoint id 41 collected  
[48:48] Charge balance equation is out by -92.4%  
[48:48] Stirrer speed set to 55  
[48:53] pH 5.32 -> 5.52  
[48:53] Using cautious pH adjust  
[48:53] Dispensed 0.000024 mL of Base (0.5 M KOH)  
[48:58] Stepping pH = 5.34

Sample name: **M12\_octanol**  
Assay name: **pH-metric high logP**  
Assay ID: **18C-03014**  
Filename: **C:\Sirius\_T3\Mehtap\20180302\_exp29\_logP\_T3-2\18C-03014\_M12\_octanol\_pH-metric high logP.t3r**

Experiment start time: **3/3/2018 6:11:21 PM**  
Analyst: **Pion**  
Instrument ID: **T312060**

## Experiment Log (continued)

[48:58] Dispensed 0.000094 mL of Base (0.5 M KOH)  
[49:03] Stepping pH = 5.61  
[49:19] Stirrer speed set to 0  
[50:01] Datapoint id 42 collected  
[50:01] Charge balance equation is out by -86.2%  
[50:01] Stirrer speed set to 55  
[50:06] pH 5.58 -> 5.78  
[50:06] Using cautious pH adjust  
[50:06] Dispensed 0.000024 mL of Base (0.5 M KOH)  
[50:11] Stepping pH = 5.58  
[50:11] Dispensed 0.000141 mL of Base (0.5 M KOH)  
[50:17] Stepping pH = 6.15  
[50:32] Stirrer speed set to 0  
[51:26] Datapoint id 43 collected  
[51:26] Charge balance equation is out by -209.7%  
[51:26] Stirrer speed set to 55  
[51:31] pH 6.15 -> 6.35  
[51:31] Using cautious pH adjust  
[51:31] Dispensed 0.000024 mL of Base (0.5 M KOH)  
[51:36] Stepping pH = 6.15  
[51:36] Dispensed 0.000118 mL of Base (0.5 M KOH)  
[51:41] Stepping pH = 6.66  
[51:56] Stirrer speed set to 0  
[52:56] Datapoint id 44 collected  
[52:56] Charge balance equation is out by -201.5%  
[52:56] Stirrer speed set to 55  
[53:01] pH 6.73 -> 6.93  
[53:01] Using cautious pH adjust  
[53:01] Dispensed 0.000024 mL of Base (0.5 M KOH)  
[53:06] Stepping pH = 6.77  
[53:06] Dispensed 0.000024 mL of Base (0.5 M KOH)  
[53:12] Stepping pH = 6.86  
[53:12] Dispensed 0.000024 mL of Base (0.5 M KOH)  
[53:17] Stepping pH = 6.98  
[53:32] Stirrer speed set to 0  
[54:32] Datapoint id 45 collected  
[54:32] Charge balance equation is out by -131.1%  
[54:32] Stirrer speed set to 55  
[54:37] pH 6.91 -> 7.11  
[54:37] Using cautious pH adjust  
[54:37] Dispensed 0.000024 mL of Base (0.5 M KOH)  
[54:42] Stepping pH = 6.88  
[54:42] Dispensed 0.000071 mL of Base (0.5 M KOH)  
[54:47] Stepping pH = 7.09  
[54:47] Dispensed 0.000024 mL of Base (0.5 M KOH)  
[54:52] Stepping pH = 7.32  
[55:07] Stirrer speed set to 0  
[56:07] Datapoint id 46 collected  
[56:07] Charge balance equation is out by -381.0%  
[56:07] Stirrer speed set to 55  
[56:13] pH 7.34 -> 7.54  
[56:13] Using cautious pH adjust  
[56:13] Dispensed 0.000024 mL of Base (0.5 M KOH)  
[56:18] Stepping pH = 7.34  
[56:18] Dispensed 0.000024 mL of Base (0.5 M KOH)  
[56:23] Stepping pH = 7.41  
[56:23] Dispensed 0.000024 mL of Base (0.5 M KOH)  
[56:28] Stepping pH = 7.58  
[56:43] Stirrer speed set to 0

Sample name: **M12\_octanol**  
 Assay name: **pH-metric high logP**  
 Assay ID: **18C-03014**  
 Filename: **C:\Sirius\_T3\Mehtap\20180302\_exp29\_logP\_T3-2\18C-03014\_M12\_octanol\_pH-metric high logP.t3r**

Experiment start time: **3/3/2018 6:11:21 PM**  
 Analyst: **Pion**  
 Instrument ID: **T312060**

## Experiment Log (continued)

[57:43] Datapoint id 47 collected  
 [57:43] Charge balance equation is out by -592.2%  
 [57:43] Stirrer speed set to 55  
 [57:48] pH 7.62 -> 7.82  
 [57:48] Using cautious pH adjust  
 [57:48] Dispensed 0.000024 mL of Base (0.5 M KOH)  
 [57:53] Stepping pH = 7.57  
 [57:53] Dispensed 0.000024 mL of Base (0.5 M KOH)  
 [57:58] Stepping pH = 7.67  
 [57:58] Dispensed 0.000024 mL of Base (0.5 M KOH)  
 [58:04] Stepping pH = 7.88  
 [58:19] Stirrer speed set to 0  
 [59:19] Datapoint id 48 collected  
 [59:19] Charge balance equation is out by -780.6%  
 [59:19] Stirrer speed set to 55  
 [59:24] pH 7.95 -> 8.15  
 [59:24] Using cautious pH adjust  
 [59:24] Dispensed 0.000024 mL of Base (0.5 M KOH)  
 [59:29] Stepping pH = 8.00  
 [59:29] Dispensed 0.000024 mL of Base (0.5 M KOH)  
 [59:34] Stepping pH = 8.15  
 [59:49] Stirrer speed set to 0  
 [1:00:49] Datapoint id 49 collected  
 [1:00:49] Charge balance equation is out by -477.9%  
 [1:00:49] Stirrer speed set to 55  
 [1:00:54] pH 8.16 -> 8.36  
 [1:00:54] Using cautious pH adjust  
 [1:00:54] Dispensed 0.000024 mL of Base (0.5 M KOH)  
 [1:00:59] Stepping pH = 8.15  
 [1:00:59] Dispensed 0.000024 mL of Base (0.5 M KOH)  
 [1:01:04] Stepping pH = 8.21  
 [1:01:05] Dispensed 0.000024 mL of Base (0.5 M KOH)  
 [1:01:10] Stepping pH = 8.35  
 [1:01:25] Stirrer speed set to 0  
 [1:02:25] Datapoint id 50 collected  
 [1:02:25] Charge balance equation is out by -765.8%  
 [1:02:25] Stirrer speed set to 55  
 [1:02:30] pH 8.21 -> 8.41  
 [1:02:30] Using cautious pH adjust  
 [1:02:30] Dispensed 0.000024 mL of Base (0.5 M KOH)  
 [1:02:35] Stepping pH = 8.16  
 [1:02:35] Dispensed 0.000024 mL of Base (0.5 M KOH)  
 [1:02:40] Stepping pH = 8.12  
 [1:02:40] Dispensed 0.000165 mL of Base (0.5 M KOH)  
 [1:02:45] Stepping pH = 8.99  
 [1:03:00] Stirrer speed set to 0  
 [1:03:35] Datapoint id 51 collected  
 [1:03:35] Charge balance equation is out by -2,119.2%  
 [1:03:35] Titration 3 of 3  
 [1:03:35] Adding initial titrants  
 [1:03:35] Automatically add 0.20000 mL of Octanol  
 [1:03:40] Dispensed 0.200000 mL of Octanol  
 [1:03:40] Stirrer speed set to 10  
 [1:03:41] Stirrer speed set to 60  
 [1:03:41] Iterative adjust 9.05 -> 2.00  
 [1:03:41] pH 9.05 -> 2.00  
 [1:03:43] Dispensed 0.058467 mL of Acid (0.5 M HCl)  
 [1:03:48] pH 2.09 -> 2.00  
 [1:03:48] Dispensed 0.009125 mL of Acid (0.5 M HCl)

Sample name: **M12\_octanol**  
Assay name: **pH-metric high logP**  
Assay ID: **18C-03014**  
Filename: **C:\Sirius\_T3\Mehtap\20180302\_exp29\_logP\_T3-2\18C-03014\_M12\_octanol\_pH-metric high logP.t3r**

Experiment start time: **3/3/2018 6:11:21 PM**  
Analyst: **Pion**  
Instrument ID: **T312060**

## Experiment Log (continued)

[1:04:38] Stirrer speed set to 0  
[1:04:48] Datapoint id 52 collected  
[1:04:48] Stirrer speed set to 60  
[1:04:54] pH 1.99 -> 2.19  
[1:04:54] Using cautious pH adjust  
[1:04:54] Dispensed 0.009548 mL of Base (0.5 M KOH)  
[1:04:59] Stepping pH = 2.07  
[1:04:59] Dispensed 0.007973 mL of Base (0.5 M KOH)  
[1:05:04] Stepping pH = 2.15  
[1:05:05] Dispensed 0.002916 mL of Base (0.5 M KOH)  
[1:05:10] Stepping pH = 2.19  
[1:05:25] Stirrer speed set to 0  
[1:05:35] Datapoint id 53 collected  
[1:05:35] Charge balance equation is out by -7.1%  
[1:05:35] Stirrer speed set to 60  
[1:05:40] pH 2.19 -> 2.39  
[1:05:40] Using charge balance adjust  
[1:05:40] Dispensed 0.012512 mL of Base (0.5 M KOH)  
[1:06:01] Stirrer speed set to 0  
[1:06:11] Datapoint id 54 collected  
[1:06:11] Charge balance equation is out by -6.0%  
[1:06:11] Stirrer speed set to 60  
[1:06:16] pH 2.38 -> 2.58  
[1:06:16] Using charge balance adjust  
[1:06:16] Dispensed 0.008655 mL of Base (0.5 M KOH)  
[1:06:36] Stirrer speed set to 0  
[1:06:47] Datapoint id 55 collected  
[1:06:47] Charge balance equation is out by -9.8%  
[1:06:47] Stirrer speed set to 60  
[1:06:52] pH 2.57 -> 2.77  
[1:06:52] Using charge balance adjust  
[1:06:52] Dispensed 0.006279 mL of Base (0.5 M KOH)  
[1:07:12] Stirrer speed set to 0  
[1:07:22] Datapoint id 56 collected  
[1:07:22] Charge balance equation is out by -5.8%  
[1:07:22] Stirrer speed set to 60  
[1:07:27] pH 2.76 -> 2.96  
[1:07:27] Using charge balance adjust  
[1:07:28] Dispensed 0.004633 mL of Base (0.5 M KOH)  
[1:07:48] Stirrer speed set to 0  
[1:07:58] Datapoint id 57 collected  
[1:07:58] Charge balance equation is out by 0.1%  
[1:07:58] Stirrer speed set to 60  
[1:08:03] pH 2.97 -> 3.17  
[1:08:03] Using charge balance adjust  
[1:08:03] Dispensed 0.003387 mL of Base (0.5 M KOH)  
[1:08:23] Stirrer speed set to 0  
[1:08:33] Datapoint id 58 collected  
[1:08:33] Charge balance equation is out by 0.6%  
[1:08:33] Stirrer speed set to 60  
[1:08:38] pH 3.18 -> 3.38  
[1:08:38] Using charge balance adjust  
[1:08:39] Dispensed 0.002469 mL of Base (0.5 M KOH)  
[1:08:59] Stirrer speed set to 0  
[1:09:09] Datapoint id 59 collected  
[1:09:09] Charge balance equation is out by 31.4%  
[1:09:09] Stirrer speed set to 60  
[1:09:14] pH 3.45 -> 3.65  
[1:09:14] Using cautious pH adjust

Sample name: **M12\_octanol**  
Assay name: **pH-metric high logP**  
Assay ID: **18C-03014**  
Filename: **C:\Sirius\_T3\Mehtap\20180302\_exp29\_logP\_T3-2\18C-03014\_M12\_octanol\_pH-metric high logP.t3r**

Experiment start time: **3/3/2018 6:11:21 PM**  
Analyst: **Pion**  
Instrument ID: **T312060**

## Experiment Log (continued)

[1:09:14] Dispensed 0.000776 mL of Base (0.5 M KOH)  
[1:09:19] Stepping pH = 3.56  
[1:09:19] Dispensed 0.000400 mL of Base (0.5 M KOH)  
[1:09:24] Stepping pH = 3.64  
[1:09:39] Stirrer speed set to 0  
[1:09:49] Datapoint id 60 collected  
[1:09:49] Charge balance equation is out by 23.3%  
[1:09:49] Stirrer speed set to 60  
[1:09:55] pH 3.65 -> 3.85  
[1:09:55] Using cautious pH adjust  
[1:09:55] Dispensed 0.000517 mL of Base (0.5 M KOH)  
[1:10:00] Stepping pH = 3.74  
[1:10:00] Dispensed 0.000353 mL of Base (0.5 M KOH)  
[1:10:05] Stepping pH = 3.84  
[1:10:20] Stirrer speed set to 0  
[1:10:30] Datapoint id 61 collected  
[1:10:30] Charge balance equation is out by 16.0%  
[1:10:30] Stirrer speed set to 60  
[1:10:35] pH 3.85 -> 4.05  
[1:10:35] Using cautious pH adjust  
[1:10:35] Dispensed 0.000353 mL of Base (0.5 M KOH)  
[1:10:41] Stepping pH = 3.95  
[1:10:41] Dispensed 0.000235 mL of Base (0.5 M KOH)  
[1:10:46] Stepping pH = 4.03  
[1:10:46] Dispensed 0.000047 mL of Base (0.5 M KOH)  
[1:10:51] Stepping pH = 4.04  
[1:11:06] Stirrer speed set to 0  
[1:11:16] Datapoint id 62 collected  
[1:11:16] Charge balance equation is out by 12.2%  
[1:11:16] Stirrer speed set to 60  
[1:11:21] pH 4.05 -> 4.25  
[1:11:21] Using charge balance adjust  
[1:11:21] Dispensed 0.000470 mL of Base (0.5 M KOH)  
[1:11:41] Stirrer speed set to 0  
[1:11:52] Datapoint id 63 collected  
[1:11:52] Charge balance equation is out by 53.3%  
[1:11:52] Stirrer speed set to 60  
[1:11:57] pH 4.37 -> 4.57  
[1:11:57] Using cautious pH adjust  
[1:11:58] Dispensed 0.000118 mL of Base (0.5 M KOH)  
[1:12:03] Stepping pH = 4.40  
[1:12:03] Dispensed 0.000212 mL of Base (0.5 M KOH)  
[1:12:08] Stepping pH = 4.63  
[1:12:23] Stirrer speed set to 0  
[1:12:35] Datapoint id 64 collected  
[1:12:35] Charge balance equation is out by -42.4%  
[1:12:35] Stirrer speed set to 60  
[1:12:40] pH 4.66 -> 4.86  
[1:12:40] Using cautious pH adjust  
[1:12:40] Dispensed 0.000071 mL of Base (0.5 M KOH)  
[1:12:45] Stepping pH = 4.68  
[1:12:45] Dispensed 0.000165 mL of Base (0.5 M KOH)  
[1:12:50] Stepping pH = 4.86  
[1:13:05] Stirrer speed set to 0  
[1:13:18] Datapoint id 65 collected  
[1:13:18] Charge balance equation is out by -88.6%  
[1:13:18] Stirrer speed set to 60  
[1:13:23] pH 4.89 -> 5.09  
[1:13:24] Using cautious pH adjust

Sample name: **M12\_octanol**  
 Assay name: **pH-metric high logP**  
 Assay ID: **18C-03014**  
 Filename: **C:\Sirius\_T3\Mehtap\20180302\_exp29\_logP\_T3-2\18C-03014\_M12\_octanol\_pH-metric high logP.t3r**

Experiment start time: **3/3/2018 6:11:21 PM**  
 Analyst: **Pion**  
 Instrument ID: **T312060**

## Experiment Log (continued)

[1:13:24] Dispensed 0.000047 mL of Base (0.5 M KOH)  
 [1:13:29] Stepping pH = 4.90  
 [1:13:29] Dispensed 0.000118 mL of Base (0.5 M KOH)  
 [1:13:34] Stepping pH = 4.99  
 [1:13:34] Dispensed 0.000071 mL of Base (0.5 M KOH)  
 [1:13:39] Stepping pH = 5.09  
 [1:13:54] Stirrer speed set to 0  
 [1:14:11] Datapoint id 66 collected  
 [1:14:11] Charge balance equation is out by -190.1%  
 [1:14:11] Stirrer speed set to 60  
 [1:14:16] pH 5.10 -> 5.30  
 [1:14:16] Using cautious pH adjust  
 [1:14:16] Dispensed 0.000024 mL of Base (0.5 M KOH)  
 [1:14:21] Stepping pH = 5.11  
 [1:14:21] Dispensed 0.000071 mL of Base (0.5 M KOH)  
 [1:14:26] Stepping pH = 5.22  
 [1:14:26] Dispensed 0.000047 mL of Base (0.5 M KOH)  
 [1:14:31] Stepping pH = 5.38  
 [1:14:46] Stirrer speed set to 0  
 [1:15:15] Datapoint id 67 collected  
 [1:15:15] Charge balance equation is out by -164.6%  
 [1:15:15] Stirrer speed set to 60  
 [1:15:20] pH 5.41 -> 5.61  
 [1:15:20] Using cautious pH adjust  
 [1:15:20] Dispensed 0.000024 mL of Base (0.5 M KOH)  
 [1:15:25] Stepping pH = 5.39  
 [1:15:25] Dispensed 0.000118 mL of Base (0.5 M KOH)  
 [1:15:30] Stepping pH = 5.71  
 [1:15:45] Stirrer speed set to 0  
 [1:16:31] Datapoint id 68 collected  
 [1:16:31] Charge balance equation is out by -225.5%  
 [1:16:31] Stirrer speed set to 60  
 [1:16:36] pH 5.83 -> 6.03  
 [1:16:36] Using cautious pH adjust  
 [1:16:36] Dispensed 0.000024 mL of Base (0.5 M KOH)  
 [1:16:42] Stepping pH = 5.89  
 [1:16:42] Dispensed 0.000024 mL of Base (0.5 M KOH)  
 [1:16:47] Stepping pH = 6.03  
 [1:17:02] Stirrer speed set to 0  
 [1:17:27] Datapoint id 69 collected  
 [1:17:27] Charge balance equation is out by -8.4%  
 [1:17:27] Stirrer speed set to 60  
 [1:17:32] pH 5.99 -> 6.19  
 [1:17:32] Using charge balance adjust  
 [1:17:32] Dispensed 0.000047 mL of Base (0.5 M KOH)  
 [1:17:52] Stirrer speed set to 0  
 [1:18:45] Datapoint id 70 collected  
 [1:18:45] Charge balance equation is out by -19.7%  
 [1:18:45] Stirrer speed set to 60  
 [1:18:50] pH 6.13 -> 6.33  
 [1:18:50] Using cautious pH adjust  
 [1:18:50] Dispensed 0.000024 mL of Base (0.5 M KOH)  
 [1:18:56] Stepping pH = 6.13  
 [1:18:56] Dispensed 0.000071 mL of Base (0.5 M KOH)  
 [1:19:01] Stepping pH = 6.19  
 [1:19:01] Dispensed 0.000094 mL of Base (0.5 M KOH)  
 [1:19:06] Stepping pH = 6.80  
 [1:19:21] Stirrer speed set to 0  
 [1:20:21] Datapoint id 71 collected



Sample name: **M12\_octanol**  
Assay name: **pH-metric high logP**  
Assay ID: **18C-03014**  
Filename: **C:\Sirius\_T3\Mehtap\20180302\_exp29\_logP\_T3-2\18C-03014\_M12\_octanol\_pH-metric high logP.t3r**

Experiment start time: **3/3/2018 6:11:21 PM**  
Analyst: **Pion**  
Instrument ID: **T312060**

## Experiment Log (continued)

[1:20:21] Charge balance equation is out by -288.0%  
[1:20:21] Stirrer speed set to 60  
[1:20:26] pH 6.74 -> 6.94  
[1:20:26] Using cautious pH adjust  
[1:20:26] Dispensed 0.000024 mL of Base (0.5 M KOH)  
[1:20:31] Stepping pH = 6.75  
[1:20:31] Dispensed 0.000047 mL of Base (0.5 M KOH)  
[1:20:37] Stepping pH = 6.90  
[1:20:37] Dispensed 0.000024 mL of Base (0.5 M KOH)  
[1:20:42] Stepping pH = 7.06  
[1:20:57] Stirrer speed set to 0  
[1:21:57] Datapoint id 72 collected  
[1:21:57] Charge balance equation is out by -166.3%  
[1:21:57] Stirrer speed set to 60  
[1:22:02] pH 7.10 -> 7.30  
[1:22:02] Using cautious pH adjust  
[1:22:02] Dispensed 0.000024 mL of Base (0.5 M KOH)  
[1:22:07] Stepping pH = 7.14  
[1:22:07] Dispensed 0.000024 mL of Base (0.5 M KOH)  
[1:22:12] Stepping pH = 7.26  
[1:22:12] Dispensed 0.000024 mL of Base (0.5 M KOH)  
[1:22:17] Stepping pH = 7.42  
[1:22:32] Stirrer speed set to 0  
[1:23:32] Datapoint id 73 collected  
[1:23:32] Charge balance equation is out by -199.6%  
[1:23:32] Stirrer speed set to 60  
[1:23:37] pH 7.39 -> 7.59  
[1:23:37] Using cautious pH adjust  
[1:23:38] Dispensed 0.000024 mL of Base (0.5 M KOH)  
[1:23:43] Stepping pH = 7.37  
[1:23:43] Dispensed 0.000024 mL of Base (0.5 M KOH)  
[1:23:48] Stepping pH = 7.35  
[1:23:48] Dispensed 0.000188 mL of Base (0.5 M KOH)  
[1:23:53] Stepping pH = 8.65  
[1:24:08] Stirrer speed set to 0  
[1:24:45] Datapoint id 74 collected  
[1:24:45] Charge balance equation is out by -1,860.7%  
[1:24:45] Stirrer speed set to 60  
[1:24:50] pH 8.76 -> 8.96  
[1:24:50] Using cautious pH adjust  
[1:24:50] Dispensed 0.000024 mL of Base (0.5 M KOH)  
[1:24:55] Stepping pH = 8.76  
[1:24:55] Dispensed 0.000047 mL of Base (0.5 M KOH)  
[1:25:00] Stepping pH = 8.82  
[1:25:00] Dispensed 0.000071 mL of Base (0.5 M KOH)  
[1:25:05] Stepping pH = 8.95  
[1:25:20] Stirrer speed set to 0  
[1:25:45] Datapoint id 75 collected  
[1:25:45] Charge balance equation is out by -332.5%  
[1:25:45] Stirrer speed set to 60  
[1:25:50] pH 8.97 -> 9.05  
[1:25:50] Using cautious pH adjust  
[1:25:50] Dispensed 0.000024 mL of Base (0.5 M KOH)  
[1:25:56] Stepping pH = 8.99  
[1:25:56] Dispensed 0.000024 mL of Base (0.5 M KOH)  
[1:26:01] Stepping pH = 8.99  
[1:26:01] Dispensed 0.000047 mL of Base (0.5 M KOH)  
[1:26:06] Stepping pH = 9.08  
[1:26:21] Stirrer speed set to 0

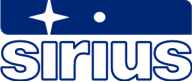

## Experiment Log

|              |                                                                                                   |                        |                            |
|--------------|---------------------------------------------------------------------------------------------------|------------------------|----------------------------|
| Sample name: | <b>M12_octanol</b>                                                                                | Experiment start time: | <b>3/3/2018 6:11:21 PM</b> |
| Assay name:  | <b>pH-metric high logP</b>                                                                        | Analyst:               | <b>Pion</b>                |
| Assay ID:    | <b>18C-03014</b>                                                                                  | Instrument ID:         | <b>T312060</b>             |
| Filename:    | <b>C:\Sirius_T3\Mehtap\20180302_exp29_logP_T3-2\18C-03014_M12_octanol_pH-metric high logP.t3r</b> |                        |                            |

### Experiment Log (continued)

[1:26:36] Datapoint id 76 collected  
[1:26:36] Charge balance equation is out by -438.5%  
[1:26:36] Argon flow rate set to 0  
[1:26:40] Titrator arm moved over Titration position
