# Supplementary material for: Octanol-water partition coefficient measurements for the SAMPL6 Blind Prediction Challenge
Source: bioRxiv or medRxiv preprint supplement (doi:10.1101/757393), 2019-12-02
Supplement: Supplementary file [file media-2.zip]

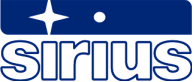

Sample name: **M13\_octanol** Experiment start time: **3/16/2018 8:34:17 PM**  
Assay name: **pH-metric high logP** Analyst: **Pion**  
Assay ID: **18C-16016** Instrument ID: **T311053**  
Filename: **C:\Sirius\_T3\Mehtap\20180316\_exp32\_logP\_T3-1\18C-16016\_M13\_octanol\_pH-metric high logP.t3r**

**pH-metric Result**

logP (XH +) -7.57 ±1.49 (n=50)  
logP (neutral X) 2.89 ±0.02 (n=50)  
RMSD 3.854

**18C-16016 Points 2 to 15**

M13\_octanol concentration factor 0.878  
Carbonate 0.0003 mM  
Acidity error 2.29946 mM

**18C-16016 Points 16 to 39**

M13\_octanol concentration factor 0.780  
Carbonate 0.0000 mM  
Acidity error 2.26129 mM

**18C-16016 Points 40 to 63**

M13\_octanol concentration factor 0.706  
Carbonate 0.1381 mM  
Acidity error 2.26901 mM

**Warnings and errors**

Errors None  
Warnings One or more logP values out of range

**Sample logD and percent species**

| pH     | M13_octanol<br>logD | M13_octanol<br>M13_octanolH | M13_octanol<br>M13_octanol | M13_octanol<br>M13_octanolH* | M13_octanol<br>M13_octanol* | Comment    |
|--------|---------------------|-----------------------------|----------------------------|------------------------------|-----------------------------|------------|
| 1.000  | -1.88               | 98.68 %                     | 0.00 %                     | 0.00 %                       | 1.31 %                      | Stomach pH |
| 1.200  | -1.68               | 97.93 %                     | 0.00 %                     | 0.00 %                       | 2.07 %                      |            |
| 2.000  | -0.88               | 88.23 %                     | 0.01 %                     | 0.00 %                       | 11.76 %                     |            |
| 3.000  | 0.12                | 42.84 %                     | 0.07 %                     | 0.00 %                       | 57.08 %                     |            |
| 4.000  | 1.12                | 6.97 %                      | 0.12 %                     | 0.00 %                       | 92.91 %                     |            |
| 5.000  | 2.06                | 0.74 %                      | 0.13 %                     | 0.00 %                       | 99.13 %                     | Blood pH   |
| 6.000  | 2.69                | 0.07 %                      | 0.13 %                     | 0.00 %                       | 99.80 %                     |            |
| 6.500  | 2.82                | 0.02 %                      | 0.13 %                     | 0.00 %                       | 99.85 %                     |            |
| 7.000  | 2.87                | 0.01 %                      | 0.13 %                     | 0.00 %                       | 99.87 %                     |            |
| 7.400  | 2.88                | 0.00 %                      | 0.13 %                     | 0.00 %                       | 99.87 %                     |            |
| 8.000  | 2.89                | 0.00 %                      | 0.13 %                     | 0.00 %                       | 99.87 %                     |            |
| 9.000  | 2.89                | 0.00 %                      | 0.13 %                     | 0.00 %                       | 99.87 %                     |            |
| 10.000 | 2.89                | 0.00 %                      | 0.13 %                     | 0.00 %                       | 99.87 %                     |            |
| 11.000 | 2.89                | 0.00 %                      | 0.13 %                     | 0.00 %                       | 99.87 %                     |            |
| 12.000 | 2.89                | 0.00 %                      | 0.13 %                     | 0.00 %                       | 99.87 %                     |            |

Sample name: **M13\_octanol**  
 Assay name: **pH-metric high logP**  
 Assay ID: **18C-16016**  
 Filename: **C:\Sirius\_T3\Mehtap\20180316\_exp32\_logP\_T3-1\18C-16016\_M13\_octanol\_pH-metric high logP.t3r**

Experiment start time: **3/16/2018 8:34:17 PM**  
 Analyst: **Pion**  
 Instrument ID: **T311053**

## Graphs

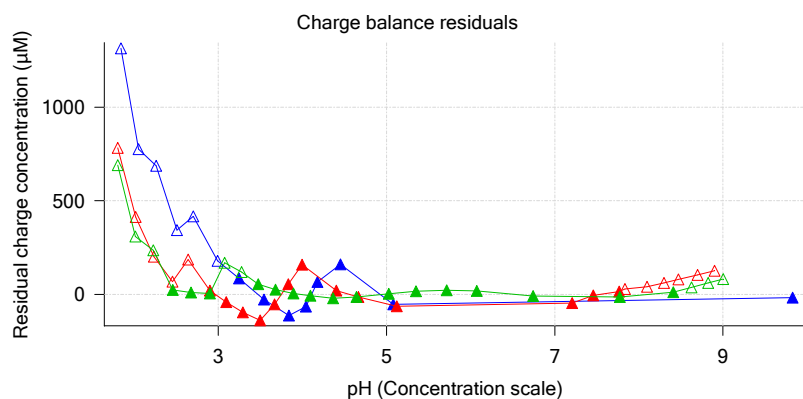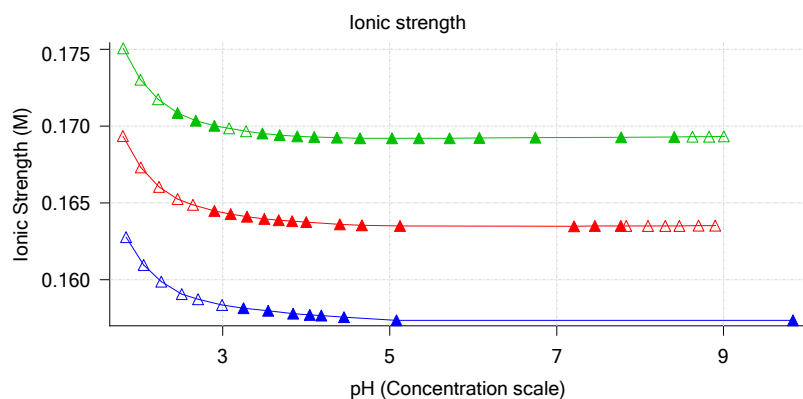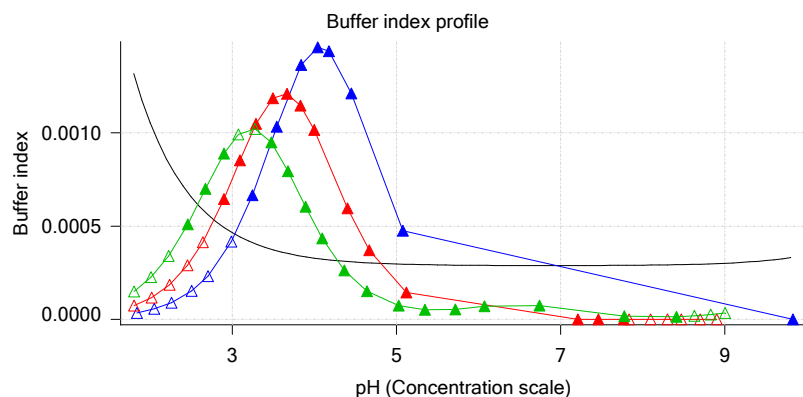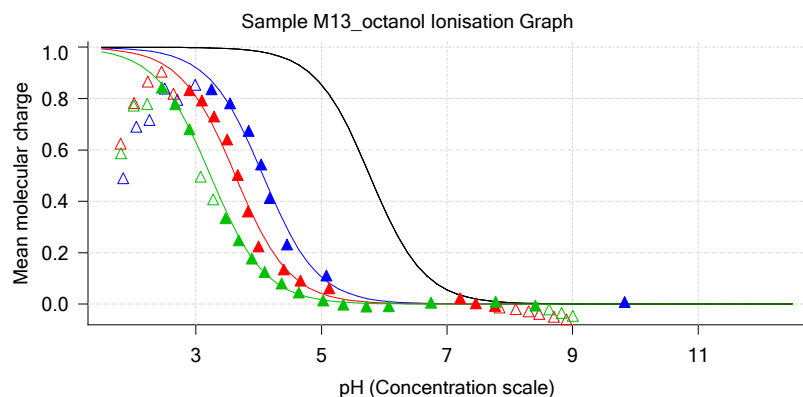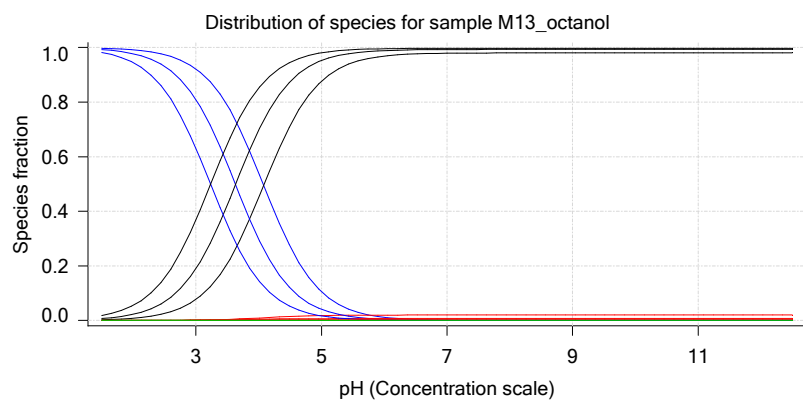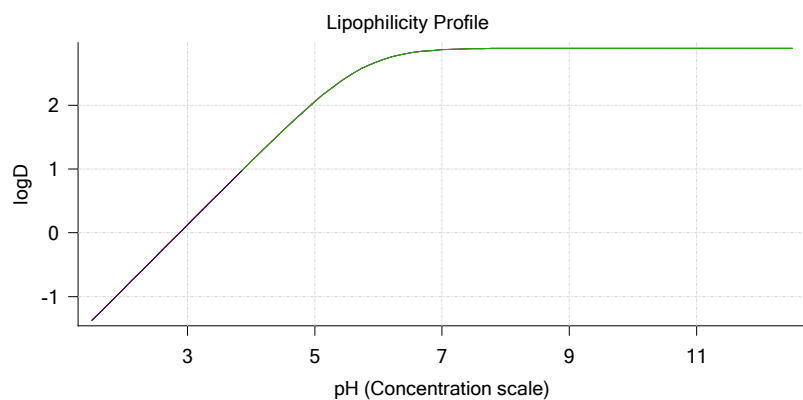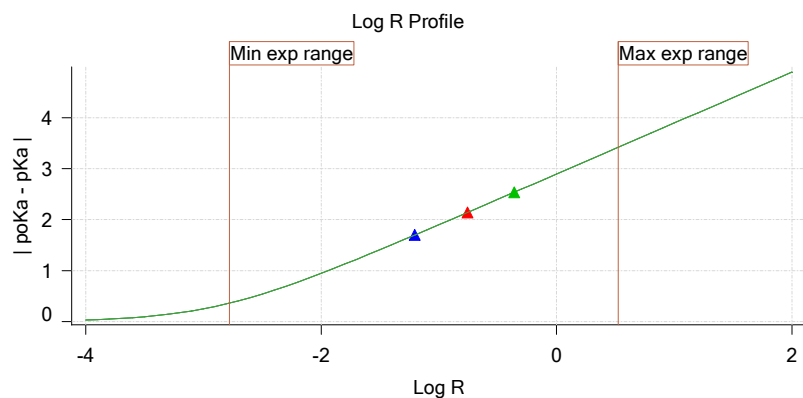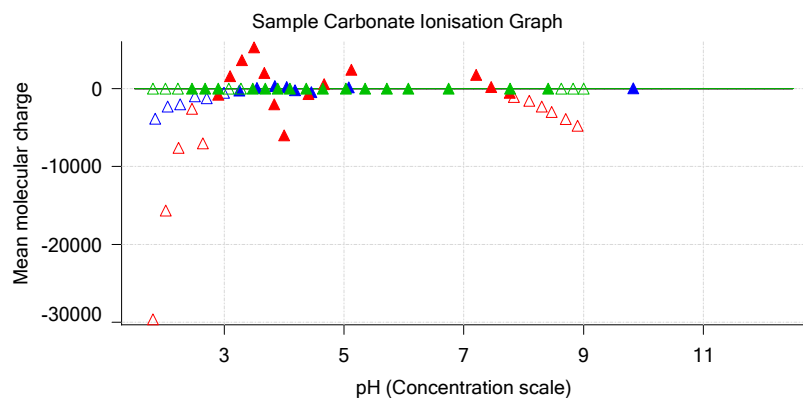

Sample name: **M13\_octanol**  
 Assay name: **pH-metric high logP**  
 Assay ID: **18C-16016**  
 Filename: **C:\Sirius\_T3\Mehtap\20180316\_exp32\_logP\_T3-1\18C-16016\_M13\_octanol\_pH-metric high logP.t3r**

Experiment start time: **3/16/2018 8:34:17 PM**  
 Analyst: **Pion**  
 Instrument ID: **T311053**

## Graphs (continued)

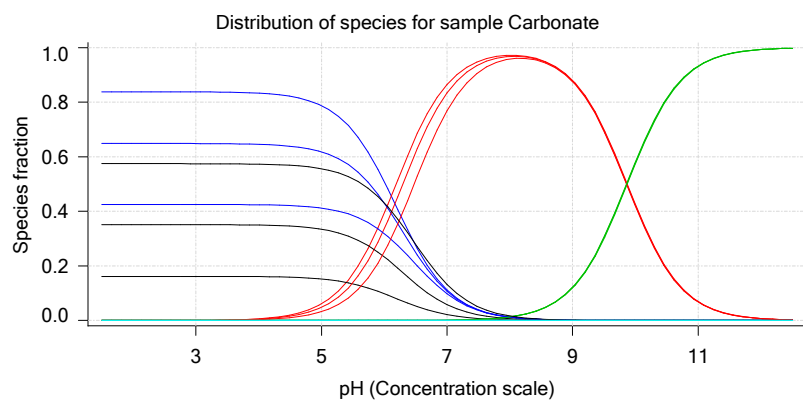

Sample name: **M13\_octanol**  
 Assay name: **pH-metric high logP**  
 Assay ID: **18C-16016**  
 Filename: **C:\Sirius\_T3\Mehtap\20180316\_exp32\_logP\_T3-1\18C-16016\_M13\_octanol\_pH-metric high logP.t3r**

Experiment start time: **3/16/2018 8:34:17 PM**  
 Analyst: **Pion**  
 Instrument ID: **T311053**

## pH-metric high logP Titration 1 of 3 18C-16016 Points 2 to 15

### Overall results

RMSD 0.073  
 Average ionic strength 0.158 M  
 Average temperature 24.8°C  
 Partition ratio 0.0624 : 1  
 Analyte concentration range 2710.7 µM to 2790.7 µM  
 Total points considered 8 of 14

### Warnings and errors

Errors None  
 Warnings One or more logP values out of range  
 Excessive acidity error present

### Four-Plus parameters

Alpha 0.167 3/16/2018 8:34:16 PM C:\Sirius\_T3\HCl18C16.t3r  
 S 0.9932 3/16/2018 8:34:16 PM C:\Sirius\_T3\HCl18C16.t3r  
 jH 0.7 3/16/2018 8:34:16 PM C:\Sirius\_T3\HCl18C16.t3r  
 jOH -0.9 3/16/2018 8:34:16 PM C:\Sirius\_T3\HCl18C16.t3r

### Titrants

0.50 M HCl 0.990198 3/16/2018 8:34:16 PM C:\Sirius\_T3\HCl18C16.t3r  
 0.50 M KOH 1.009620 3/16/2018 8:34:17 PM C:\Sirius\_T3\KOH18C16.t3r

### Sample

M13\_octanol concentration factor 0.878  
 Base pKa 1 5.77  
 logP (XH +) -4.56  
 logP (neutral X) 2.90

### Sample graphs

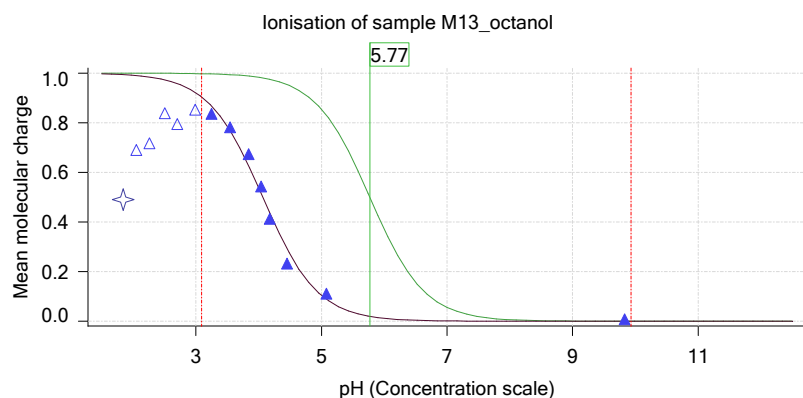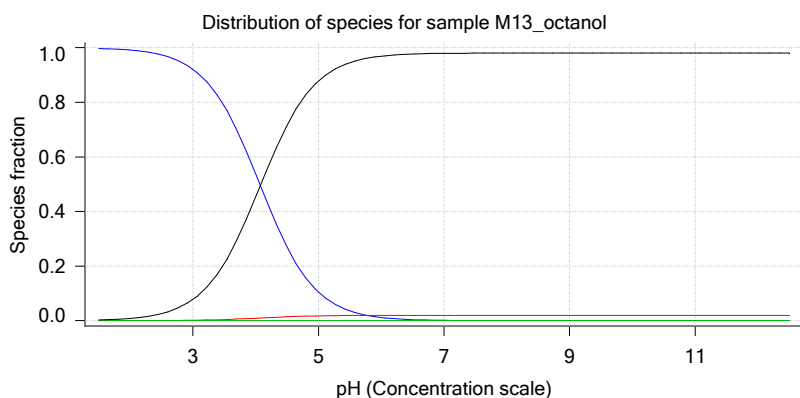

Sample name: **M13\_octanol**  
 Assay name: **pH-metric high logP**  
 Assay ID: **18C-16016**  
 Filename: **C:\Sirius\_T3\Mehtap\20180316\_exp32\_logP\_T3-1\18C-16016\_M13\_octanol\_pH-metric high logP.t3r**

Experiment start time: **3/16/2018 8:34:17 PM**  
 Analyst: **Pion**  
 Instrument ID: **T311053**

## Sample graphs (continued)

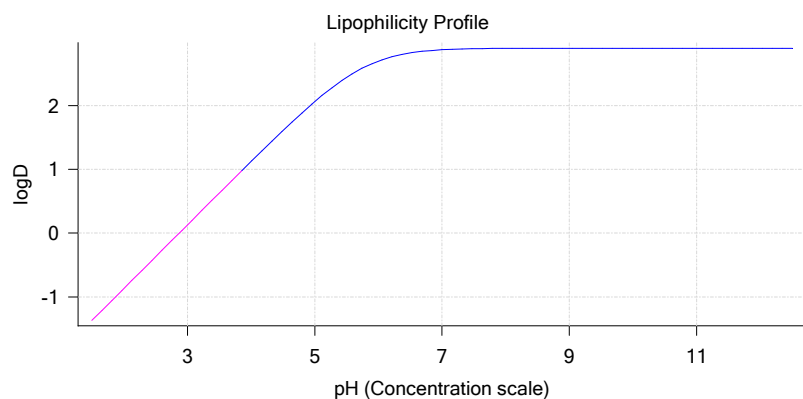

## Sample logD and percent species

| pH     | M13_octanol<br>logD | M13_octanol<br>M13_octanolH | M13_octanol<br>M13_octanolH | M13_octanol<br>M13_octanolH* | M13_octanol<br>M13_octanol* | Comment    |
|--------|---------------------|-----------------------------|-----------------------------|------------------------------|-----------------------------|------------|
| 1.000  | -1.87               | 99.91 %                     | 0.00 %                      | 0.00 %                       | 0.08 %                      | Stomach pH |
| 1.200  | -1.67               | 99.86 %                     | 0.00 %                      | 0.00 %                       | 0.13 %                      |            |
| 2.000  | -0.87               | 99.15 %                     | 0.02 %                      | 0.00 %                       | 0.83 %                      |            |
| 3.000  | 0.13                | 92.10 %                     | 0.16 %                      | 0.00 %                       | 7.75 %                      |            |
| 4.000  | 1.12                | 53.81 %                     | 0.91 %                      | 0.00 %                       | 45.27 %                     |            |
| 5.000  | 2.06                | 10.43 %                     | 1.77 %                      | 0.00 %                       | 87.79 %                     | Blood pH   |
| 6.000  | 2.70                | 1.15 %                      | 1.96 %                      | 0.00 %                       | 96.89 %                     |            |
| 6.500  | 2.83                | 0.37 %                      | 1.97 %                      | 0.00 %                       | 97.66 %                     |            |
| 7.000  | 2.87                | 0.12 %                      | 1.98 %                      | 0.00 %                       | 97.91 %                     |            |
| 7.400  | 2.89                | 0.05 %                      | 1.98 %                      | 0.00 %                       | 97.98 %                     |            |
| 8.000  | 2.90                | 0.01 %                      | 1.98 %                      | 0.00 %                       | 98.01 %                     |            |
| 9.000  | 2.90                | 0.00 %                      | 1.98 %                      | 0.00 %                       | 98.02 %                     |            |
| 10.000 | 2.90                | 0.00 %                      | 1.98 %                      | 0.00 %                       | 98.02 %                     |            |
| 11.000 | 2.90                | 0.00 %                      | 1.98 %                      | 0.00 %                       | 98.02 %                     |            |
| 12.000 | 2.90                | 0.00 %                      | 1.98 %                      | 0.00 %                       | 98.02 %                     |            |

## Carbonate and acidity

Carbonate 0.000 mM  
 Acidity error 2.299 mM

## Other graphs

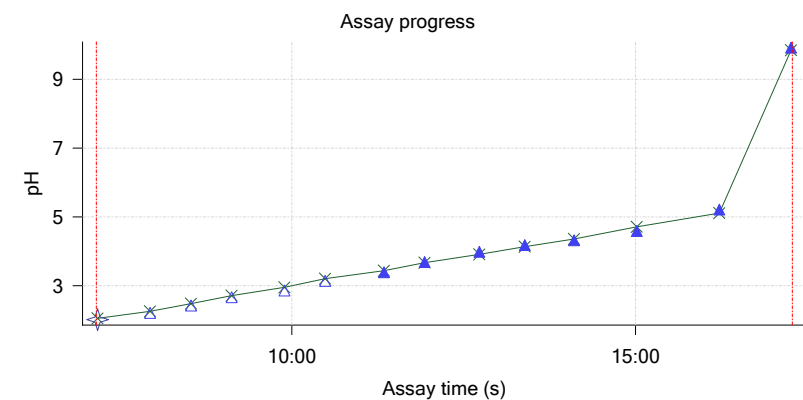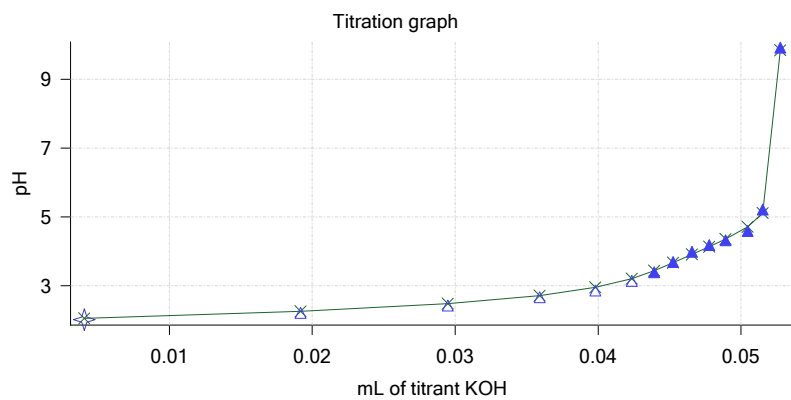

Sample name: **M13\_octanol**  
 Assay name: **pH-metric high logP**  
 Assay ID: **18C-16016**  
 Filename: **C:\Sirius\_T3\Mehtap\20180316\_exp32\_logP\_T3-1\18C-16016\_M13\_octanol\_pH-metric high logP.t3r**

Experiment start time: **3/16/2018 8:34:17 PM**  
 Analyst: **Pion**  
 Instrument ID: **T311053**

## Other graphs (continued)

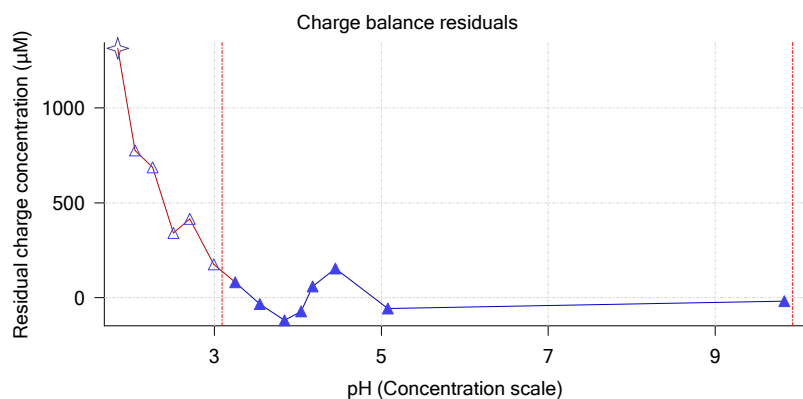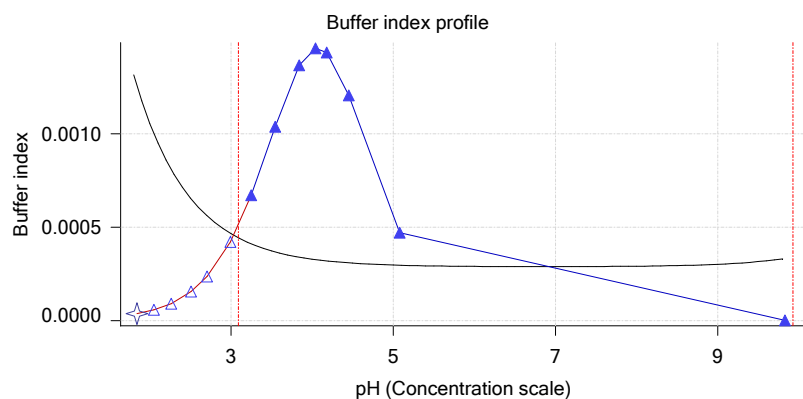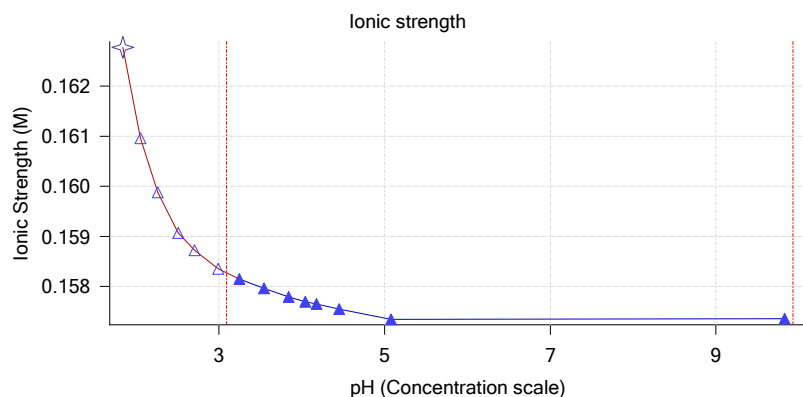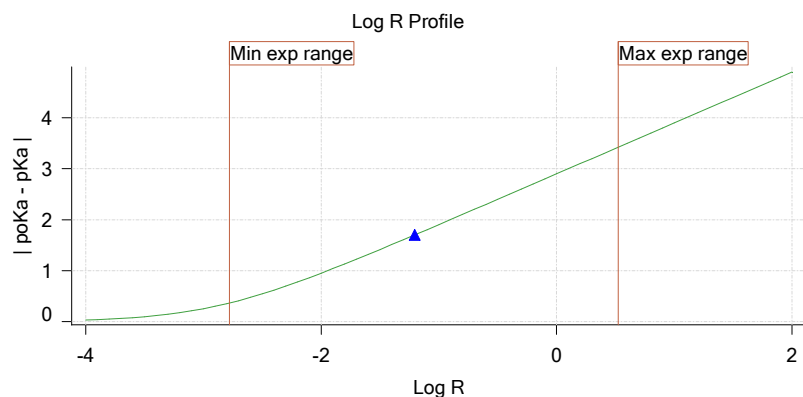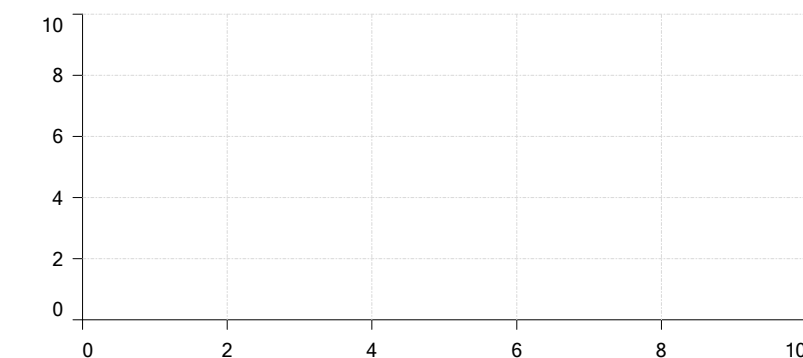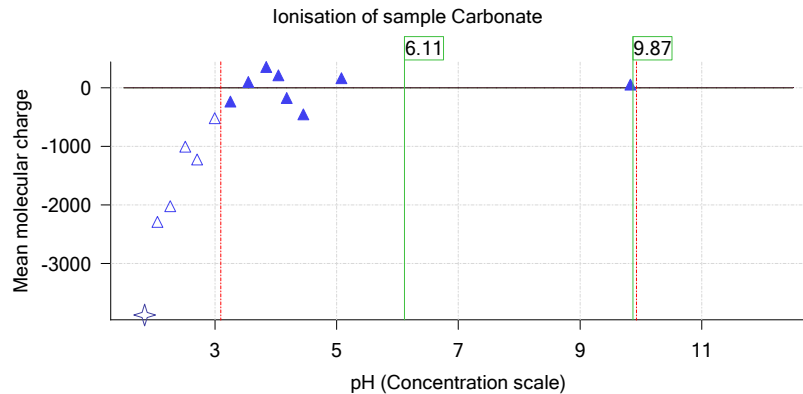

Sample name: **M13\_octanol**  
 Assay name: **pH-metric high logP**  
 Assay ID: **18C-16016**  
 Filename: **C:\Sirius\_T3\Mehtap\20180316\_exp32\_logP\_T3-1\18C-16016\_M13\_octanol\_pH-metric high logP.t3r**

Experiment start time: **3/16/2018 8:34:17 PM**  
 Analyst: **Pion**  
 Instrument ID: **T311053**

pH-metric high logP Titration 2 of 3 18C-16016 Points 16 to 39

## Overall results

RMSD 6.380  
 Average ionic strength 0.164 M  
 Average temperature 24.9°C  
 Partition ratio 0.1752 : 1  
 Analyte concentration range 2287.9 µM to 2354.2 µM  
 Total points considered 13 of 24

## Warnings and errors

Errors None  
 Warnings One or more logP values out of range  
 Excessive acidity error present

## Four-Plus parameters

Alpha 0.167 3/16/2018 8:34:16 PM C:\Sirius\_T3\HCl18C16.t3r  
 S 0.9932 3/16/2018 8:34:16 PM C:\Sirius\_T3\HCl18C16.t3r  
 jH 0.7 3/16/2018 8:34:16 PM C:\Sirius\_T3\HCl18C16.t3r  
 jOH -0.9 3/16/2018 8:34:16 PM C:\Sirius\_T3\HCl18C16.t3r

## Titrants

0.50 M HCl 0.990198 3/16/2018 8:34:16 PM C:\Sirius\_T3\HCl18C16.t3r  
 0.50 M KOH 1.009620 3/16/2018 8:34:17 PM C:\Sirius\_T3\KOH18C16.t3r

## Sample

M13\_octanol concentration factor 0.780  
 Base pKa 1 5.77  
 logP (XH +) -4.56  
 logP (neutral X) 2.88

## Sample graphs

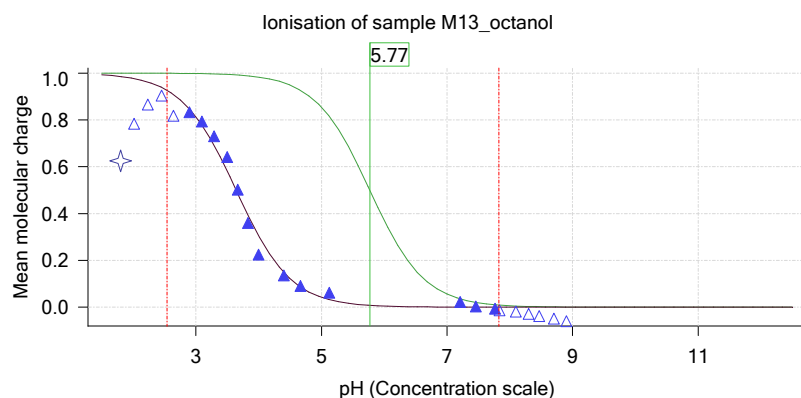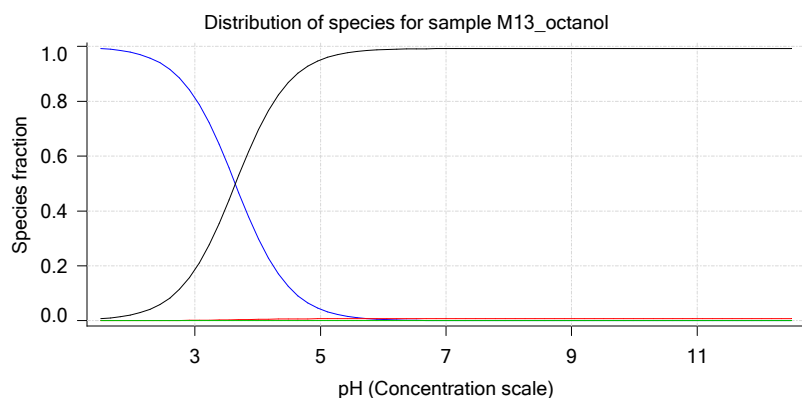

Sample name: **M13\_octanol**  
 Assay name: **pH-metric high logP**  
 Assay ID: **18C-16016**  
 Filename: **C:\Sirius\_T3\Mehtap\20180316\_exp32\_logP\_T3-1\18C-16016\_M13\_octanol\_pH-metric high logP.t3r**

Experiment start time: **3/16/2018 8:34:17 PM**  
 Analyst: **Pion**  
 Instrument ID: **T311053**

## Sample graphs (continued)

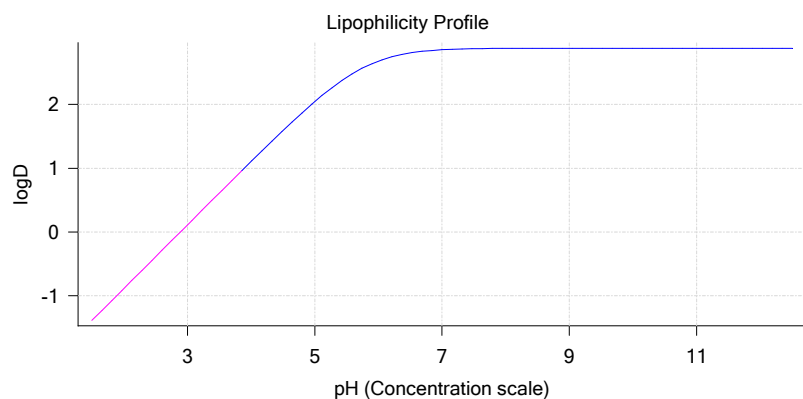

## Sample logD and percent species

| pH     | M13_octanol<br>logD | M13_octanol<br>M13_octanolH | M13_octanol<br>M13_octanolH | M13_octanol<br>M13_octanolH* | M13_octanol<br>M13_octanol* | Comment    |
|--------|---------------------|-----------------------------|-----------------------------|------------------------------|-----------------------------|------------|
| 1.000  | -1.89               | 99.77 %                     | 0.00 %                      | 0.00 %                       | 0.23 %                      | Stomach pH |
| 1.200  | -1.69               | 99.64 %                     | 0.00 %                      | 0.00 %                       | 0.36 %                      |            |
| 2.000  | -0.89               | 97.77 %                     | 0.02 %                      | 0.00 %                       | 2.22 %                      |            |
| 3.000  | 0.11                | 81.41 %                     | 0.14 %                      | 0.00 %                       | 18.45 %                     |            |
| 4.000  | 1.10                | 30.46 %                     | 0.52 %                      | 0.00 %                       | 69.02 %                     |            |
| 5.000  | 2.04                | 4.20 %                      | 0.71 %                      | 0.00 %                       | 95.09 %                     | Blood pH   |
| 6.000  | 2.68                | 0.44 %                      | 0.74 %                      | 0.00 %                       | 98.82 %                     |            |
| 6.500  | 2.81                | 0.14 %                      | 0.74 %                      | 0.00 %                       | 99.12 %                     |            |
| 7.000  | 2.86                | 0.04 %                      | 0.74 %                      | 0.00 %                       | 99.21 %                     |            |
| 7.400  | 2.87                | 0.02 %                      | 0.74 %                      | 0.00 %                       | 99.24 %                     |            |
| 8.000  | 2.88                | 0.00 %                      | 0.74 %                      | 0.00 %                       | 99.25 %                     |            |
| 9.000  | 2.88                | 0.00 %                      | 0.74 %                      | 0.00 %                       | 99.26 %                     |            |
| 10.000 | 2.88                | 0.00 %                      | 0.74 %                      | 0.00 %                       | 99.26 %                     |            |
| 11.000 | 2.88                | 0.00 %                      | 0.74 %                      | 0.00 %                       | 99.26 %                     |            |
| 12.000 | 2.88                | 0.00 %                      | 0.74 %                      | 0.00 %                       | 99.26 %                     |            |

## Carbonate and acidity

Carbonate 0.000 mM  
 Acidity error 2.261 mM

## Other graphs

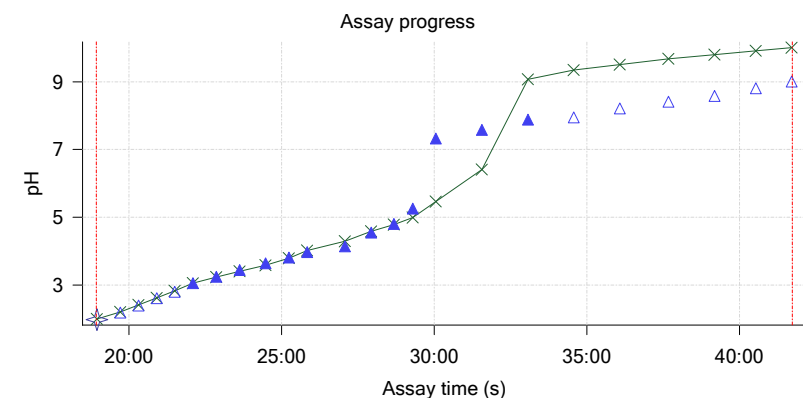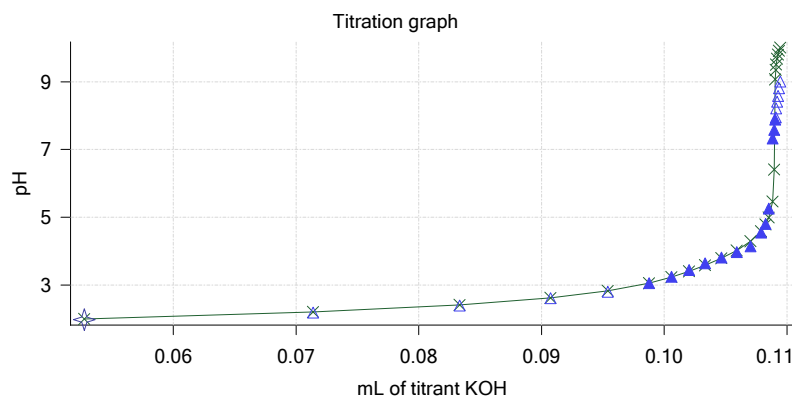



Sample name: **M13\_octanol**  
 Assay name: **pH-metric high logP**  
 Assay ID: **18C-16016**  
 Filename: **C:\Sirius\_T3\Mehtap\20180316\_exp32\_logP\_T3-1\18C-16016\_M13\_octanol\_pH-metric high logP.t3r**

Experiment start time: **3/16/2018 8:34:17 PM**  
 Analyst: **Pion**  
 Instrument ID: **T311053**

## Other graphs (continued)

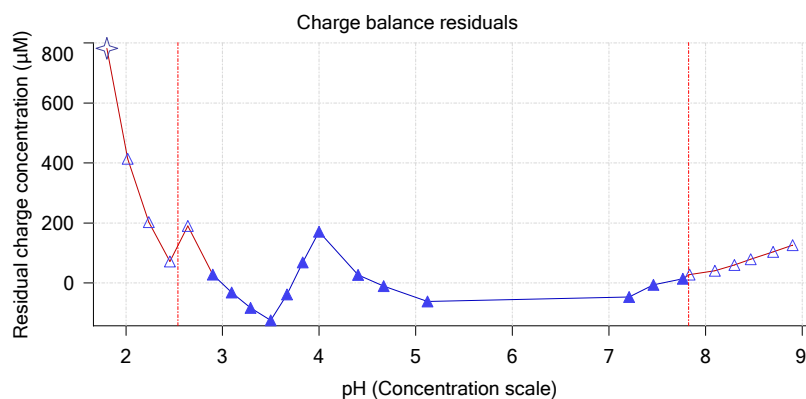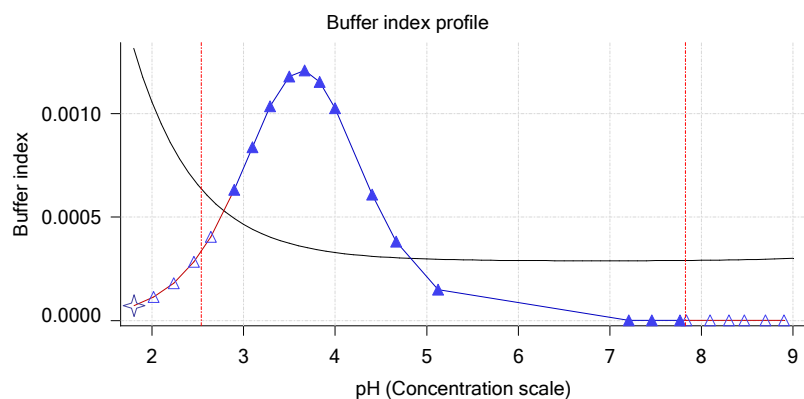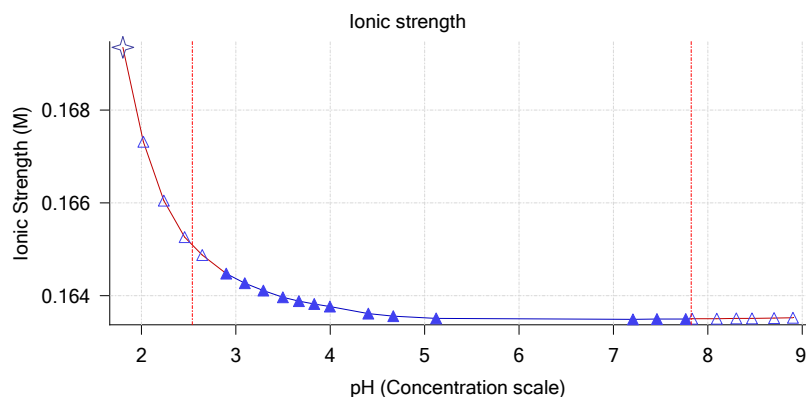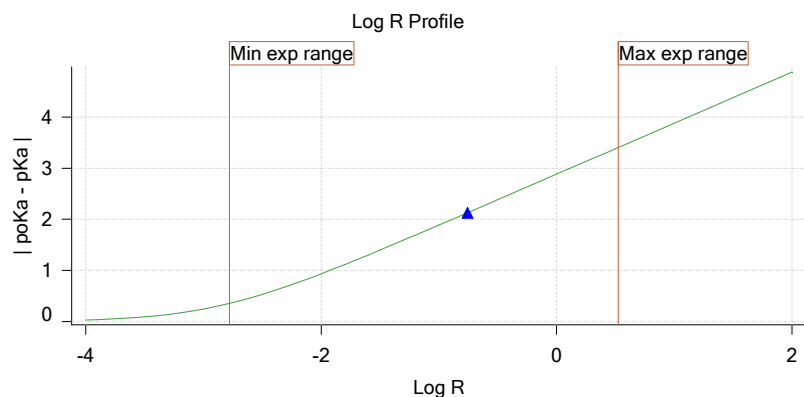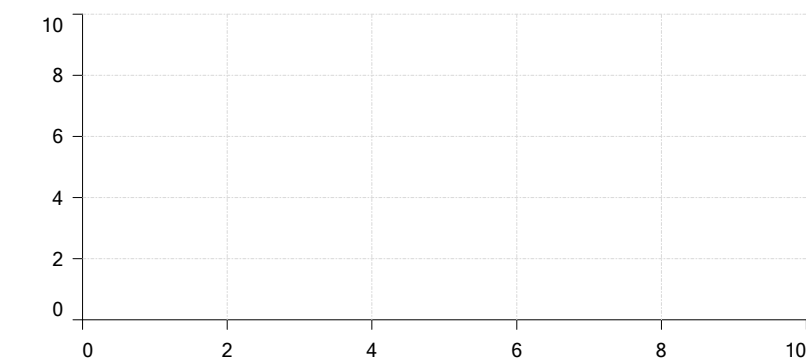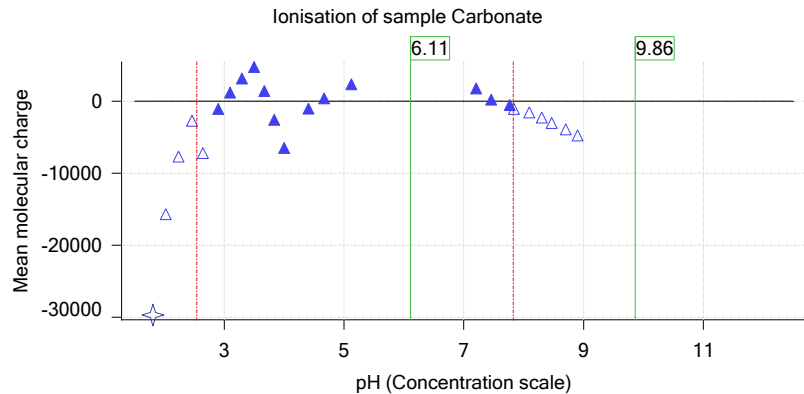

Sample name: **M13\_octanol**  
 Assay name: **pH-metric high logP**  
 Assay ID: **18C-16016**  
 Filename: **C:\Sirius\_T3\Mehtap\20180316\_exp32\_logP\_T3-1\18C-16016\_M13\_octanol\_pH-metric high logP.t3r**

Experiment start time: **3/16/2018 8:34:17 PM**  
 Analyst: **Pion**  
 Instrument ID: **T311053**

pH-metric high logP Titration 3 of 3 18C-16016 Points 40 to 63

## Overall results

RMSD 0.265  
 Average ionic strength 0.169 M  
 Average temperature 25.0°C  
 Partition ratio 0.4371 : 1  
 Analyte concentration range 1749.3 µM to 1790.0 µM  
 Total points considered 16 of 24

## Warnings and errors

Errors None  
 Warnings One or more logP values out of range  
 Excessive acidity error present

## Four-Plus parameters

Alpha 0.167 3/16/2018 8:34:16 PM C:\Sirius\_T3\HCl18C16.t3r  
 S 0.9932 3/16/2018 8:34:16 PM C:\Sirius\_T3\HCl18C16.t3r  
 jH 0.7 3/16/2018 8:34:16 PM C:\Sirius\_T3\HCl18C16.t3r  
 jOH -0.9 3/16/2018 8:34:16 PM C:\Sirius\_T3\HCl18C16.t3r

## Titrants

0.50 M HCl 0.990198 3/16/2018 8:34:16 PM C:\Sirius\_T3\HCl18C16.t3r  
 0.50 M KOH 1.009620 3/16/2018 8:34:17 PM C:\Sirius\_T3\KOH18C16.t3r

## Sample

M13\_octanol concentration factor 0.706  
 Base pKa 1 5.77  
 logP (XH +) -4.56  
 logP (neutral X) 2.92

## Sample graphs

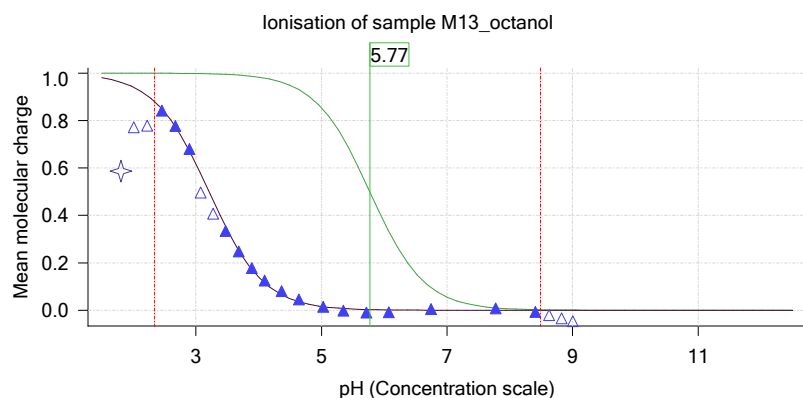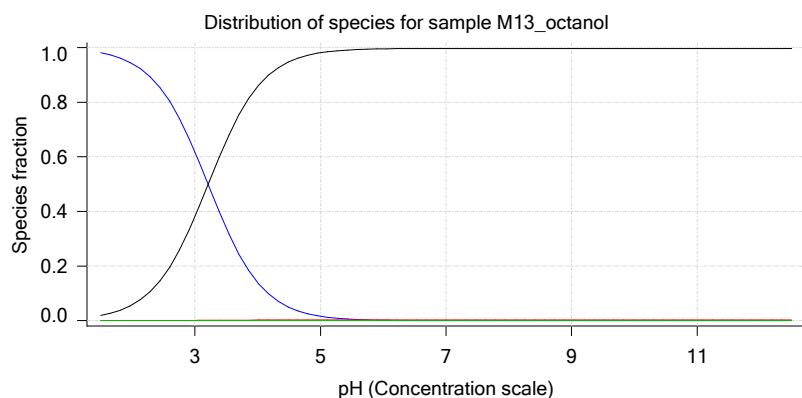

Sample name: **M13\_octanol**  
 Assay name: **pH-metric high logP**  
 Assay ID: **18C-16016**  
 Filename: **C:\Sirius\_T3\Mehtap\20180316\_exp32\_logP\_T3-1\18C-16016\_M13\_octanol\_pH-metric high logP.t3r**

Experiment start time: **3/16/2018 8:34:17 PM**  
 Analyst: **Pion**  
 Instrument ID: **T311053**

## Sample graphs (continued)

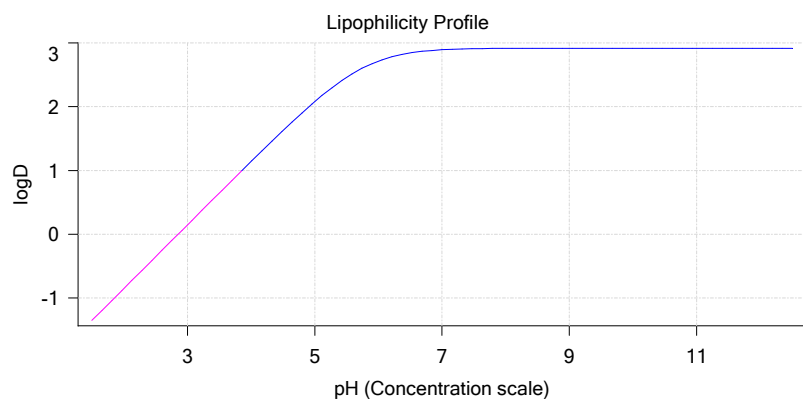

## Sample logD and percent species

| pH     | M13_octanol<br>logD | M13_octanol<br>M13_octanolH | M13_octanol<br>M13_octanolH | M13_octanol<br>M13_octanolH* | M13_octanol<br>M13_octanol* | Comment    |
|--------|---------------------|-----------------------------|-----------------------------|------------------------------|-----------------------------|------------|
| 1.000  | -1.85               | 99.39 %                     | 0.00 %                      | 0.00 %                       | 0.61 %                      | Stomach pH |
| 1.200  | -1.65               | 99.03 %                     | 0.00 %                      | 0.00 %                       | 0.96 %                      |            |
| 2.000  | -0.85               | 94.19 %                     | 0.02 %                      | 0.00 %                       | 5.79 %                      |            |
| 3.000  | 0.15                | 61.87 %                     | 0.11 %                      | 0.00 %                       | 38.02 %                     |            |
| 4.000  | 1.14                | 13.96 %                     | 0.24 %                      | 0.00 %                       | 85.80 %                     |            |
| 5.000  | 2.08                | 1.60 %                      | 0.27 %                      | 0.00 %                       | 98.13 %                     | Blood pH   |
| 6.000  | 2.72                | 0.16 %                      | 0.28 %                      | 0.00 %                       | 99.56 %                     |            |
| 6.500  | 2.84                | 0.05 %                      | 0.28 %                      | 0.00 %                       | 99.67 %                     |            |
| 7.000  | 2.89                | 0.02 %                      | 0.28 %                      | 0.00 %                       | 99.71 %                     |            |
| 7.400  | 2.91                | 0.01 %                      | 0.28 %                      | 0.00 %                       | 99.72 %                     |            |
| 8.000  | 2.92                | 0.00 %                      | 0.28 %                      | 0.00 %                       | 99.72 %                     |            |
| 9.000  | 2.92                | 0.00 %                      | 0.28 %                      | 0.00 %                       | 99.72 %                     |            |
| 10.000 | 2.92                | 0.00 %                      | 0.28 %                      | 0.00 %                       | 99.72 %                     |            |
| 11.000 | 2.92                | 0.00 %                      | 0.28 %                      | 0.00 %                       | 99.72 %                     |            |
| 12.000 | 2.92                | 0.00 %                      | 0.28 %                      | 0.00 %                       | 99.72 %                     |            |

## Carbonate and acidity

 Carbonate 0.138 mM  
 Acidity error 2.269 mM

## Other graphs

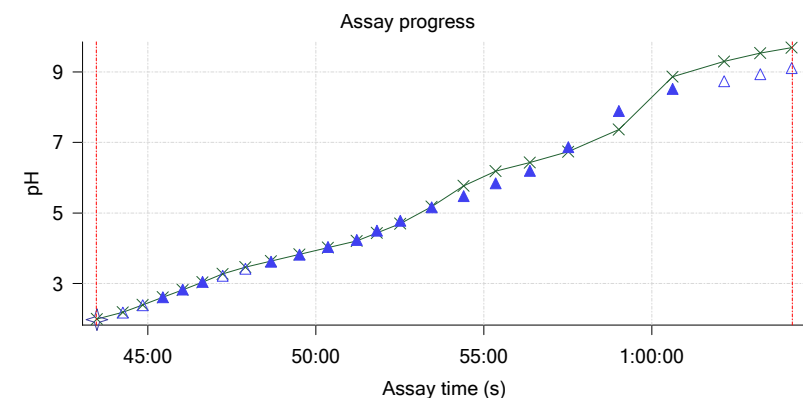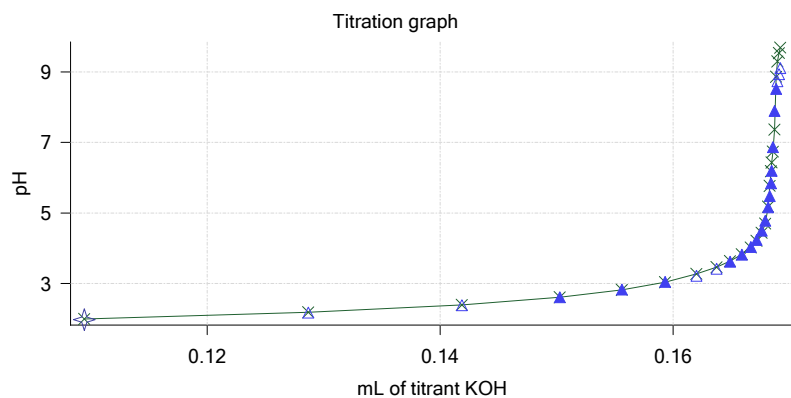

Sample name: **M13\_octanol**  
 Assay name: **pH-metric high logP**  
 Assay ID: **18C-16016**  
 Filename: **C:\Sirius\_T3\Mehtap\20180316\_exp32\_logP\_T3-1\18C-16016\_M13\_octanol\_pH-metric high logP.t3r**

Experiment start time: **3/16/2018 8:34:17 PM**  
 Analyst: **Pion**  
 Instrument ID: **T311053**

## Other graphs (continued)

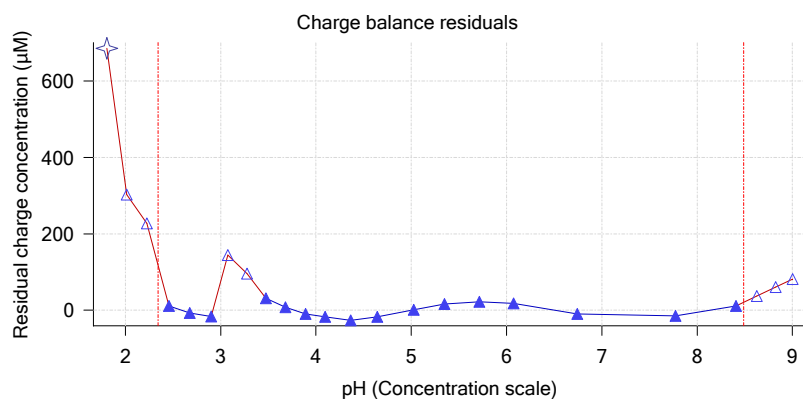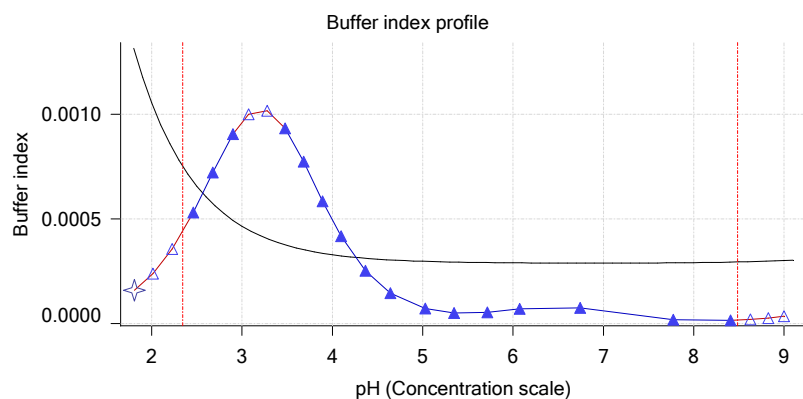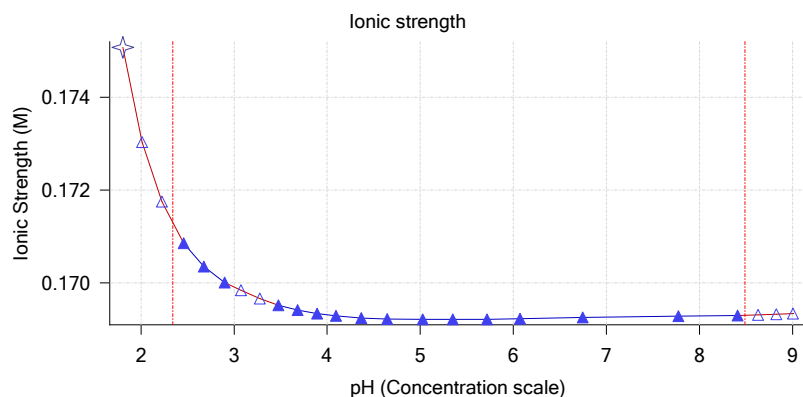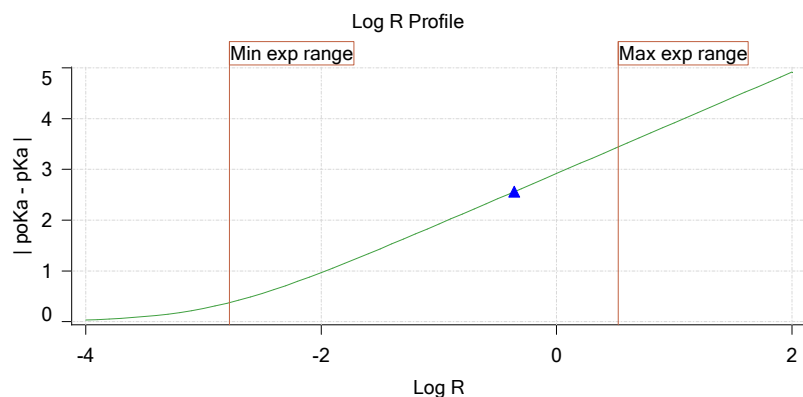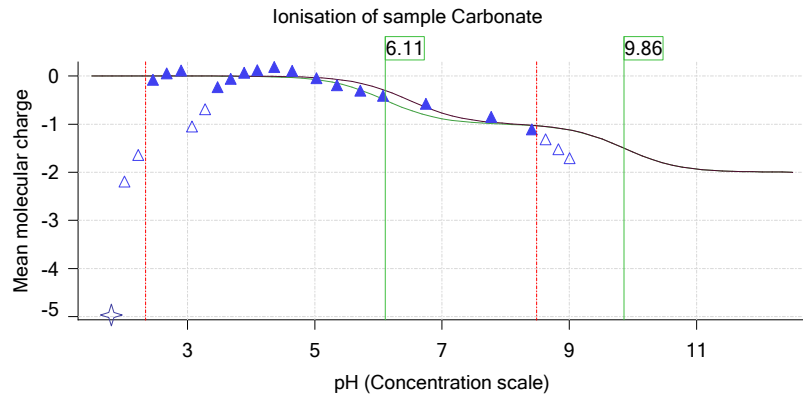

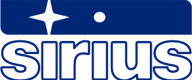

## Assay model

Sample name: **M13\_octanol** Experiment start time: **3/16/2018 8:34:17 PM**  
Assay name: **pH-metric high logP** Analyst: **Pion**  
Assay ID: **18C-16016** Instrument ID: **T311053**  
Filename: **C:\Sirius\_T3\Mehtap\20180316\_exp32\_logP\_T3-1\18C-16016\_M13\_octanol\_pH-metric high logP.t3r**

## Assay Model

| Settings                          | Value        | Date/Time changed    | Imported from      |
|-----------------------------------|--------------|----------------------|--------------------|
| Sample name                       | M13_octanol  | 2/27/2018 5:57:49 PM | User entered value |
| Sample by                         | Weight       |                      | Default value      |
| Sample weight                     | 0.001360 g   | 3/16/2018 5:08:03 PM | User entered value |
| Formula weight                    | 295.34 g/mol | 2/27/2018 5:57:49 PM | User entered value |
| Solubility                        | Unknown      |                      | Default value      |
| Molecular weight                  | 295.34       | 2/27/2018 5:57:49 PM | User entered value |
| Individual pKa ionic environments | No           |                      | Default value      |
| Number of pKas                    | 1            | 2/27/2018 5:57:49 PM | User entered value |
| Sample is a                       | Base         | 2/27/2018 5:57:49 PM | User entered value |
| pKa 1                             | 5.77         | 2/27/2018 5:57:49 PM | User entered value |
| logp (XH +)                       | -4.56        | 3/2/2018 4:30:48 PM  | User entered value |
| logP (neutral X)                  | 2.99         | 3/2/2018 4:30:43 PM  | User entered value |

## Events

| Time    | Event                  | Water      | Acid       | Base       | Octanol    | pH    | dpH/dt   | pH R-squared | pH SD   | dpH/<br>time |
|---------|------------------------|------------|------------|------------|------------|-------|----------|--------------|---------|--------------|
| 4:09.8  | Manual volume addition |            |            |            | 0.10000 mL |       |          |              |         |              |
| 4:10.9  | Initial pH = 3.69      |            |            |            |            |       |          |              |         |              |
| 7:10.4  | Data point 2           | 1.50000 mL | 0.04605 mL | 0.00405 mL | 0.10000 mL | 2.007 | 0.00659  | 0.78015      | 0.00037 | 10.0<br>s    |
| 7:56.4  | Data point 3           | 1.50000 mL | 0.04605 mL | 0.01919 mL | 0.10000 mL | 2.211 | 0.00314  | 0.24211      | 0.00032 | 10.0<br>s    |
| 8:32.1  | Data point 4           | 1.50000 mL | 0.04605 mL | 0.02949 mL | 0.10000 mL | 2.417 | -0.01053 | 0.38713      | 0.00084 | 10.0<br>s    |
| 9:07.7  | Data point 5           | 1.50000 mL | 0.04605 mL | 0.03591 mL | 0.10000 mL | 2.660 | -0.00938 | 0.73483      | 0.00054 | 10.0<br>s    |
| 9:53.5  | Data point 6           | 1.50000 mL | 0.04605 mL | 0.03982 mL | 0.10000 mL | 2.855 | -0.00211 | 0.30085      | 0.00019 | 10.0<br>s    |
| 10:29.0 | Data point 7           | 1.50000 mL | 0.04605 mL | 0.04236 mL | 0.10000 mL | 3.139 | -0.00782 | 0.88102      | 0.00041 | 10.5<br>s    |
| 11:20.4 | Data point 8           | 1.50000 mL | 0.04605 mL | 0.04393 mL | 0.10000 mL | 3.394 | -0.00736 | 0.41781      | 0.00056 | 10.0<br>s    |
| 11:55.9 | Data point 9           | 1.50000 mL | 0.04605 mL | 0.04525 mL | 0.10000 mL | 3.686 | -0.01800 | 0.93937      | 0.00092 | 12.0<br>s    |
| 12:43.6 | Data point 10          | 1.50000 mL | 0.04605 mL | 0.04657 mL | 0.10000 mL | 3.982 | -0.01971 | 0.97981      | 0.00098 | 14.5<br>s    |
| 13:23.6 | Data point 11          | 1.50000 mL | 0.04605 mL | 0.04779 mL | 0.10000 mL | 4.181 | -0.01960 | 0.95605      | 0.00099 | 17.5<br>s    |
| 14:06.5 | Data point 12          | 1.50000 mL | 0.04605 mL | 0.04892 mL | 0.10000 mL | 4.317 | -0.01919 | 0.90540      | 0.00100 | 19.0<br>s    |
| 15:01.2 | Data point 13          | 1.50000 mL | 0.04605 mL | 0.05047 mL | 0.10000 mL | 4.588 | -0.01947 | 0.95881      | 0.00098 | 36.5<br>s    |
| 16:13.4 | Data point 14          | 1.50000 mL | 0.04605 mL | 0.05153 mL | 0.10000 mL | 5.212 | 0.01166  | 0.44692      | 0.00086 | 32.0<br>s    |
| 17:16.0 | Data point 15          | 1.50000 mL | 0.04605 mL | 0.05275 mL | 0.10000 mL | 9.929 | -0.01846 | 0.92278      | 0.00095 | 43.5<br>s    |
| 18:57.2 | Data point 16          | 1.50000 mL | 0.10329 mL | 0.05275 mL | 0.30000 mL | 1.971 | -0.00110 | 0.01132      | 0.00051 | 10.0<br>s    |
| 19:43.4 | Data point 17          | 1.50000 mL | 0.10329 mL | 0.07140 mL | 0.30000 mL | 2.179 | 0.00116  | 0.00555      | 0.00077 | 10.0<br>s    |
| 20:19.1 | Data point 18          | 1.50000 mL | 0.10329 mL | 0.08333 mL | 0.30000 mL | 2.393 | -0.00552 | 0.08741      | 0.00092 | 10.0<br>s    |
| 20:54.7 | Data point 19          | 1.50000 mL | 0.10329 mL | 0.09073 mL | 0.30000 mL | 2.610 | -0.00664 | 0.54896      | 0.00044 | 10.0<br>s    |
| 21:30.3 | Data point 20          | 1.50000 mL | 0.10329 mL | 0.09541 mL | 0.30000 mL | 2.793 | -0.01670 | 0.91771      | 0.00086 | 10.5<br>s    |

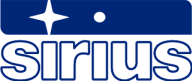

## Assay Events

Sample name: **M13\_octanol**  
Assay name: **pH-metric high logP**  
Assay ID: **18C-16016**  
Filename: **C:\Sirius\_T3\Mehtap\20180316\_exp32\_logP\_T3-1\18C-16016\_M13\_octanol\_pH-metric high logP.t3r**

Experiment start time: **3/16/2018 8:34:17 PM**  
Analyst: **Pion**  
Instrument ID: **T311053**

## Events (continued)

| Time      | Event         | Water      | Acid       | Base       | Octanol    | pH    | dpH/dt   | pH R-squared | pH SD   | dpH/dt time         |
|-----------|---------------|------------|------------|------------|------------|-------|----------|--------------|---------|---------------------|
| 22:06.3   | Data point 21 | 1.50000 mL | 0.10329 mL | 0.09875 mL | 0.30000 mL | 3.048 | -0.00688 | 0.24255      | 0.00069 | 10.0 s              |
| 22:52.1   | Data point 22 | 1.50000 mL | 0.10329 mL | 0.10059 mL | 0.30000 mL | 3.242 | -0.00986 | 0.45925      | 0.00072 | 10.0 s              |
| 23:37.8   | Data point 23 | 1.50000 mL | 0.10329 mL | 0.10202 mL | 0.30000 mL | 3.436 | -0.00502 | 0.22328      | 0.00052 | 10.0 s              |
| 24:28.7   | Data point 24 | 1.50000 mL | 0.10329 mL | 0.10332 mL | 0.30000 mL | 3.641 | -0.01457 | 0.55071      | 0.00097 | 10.0 s              |
| 25:14.5   | Data point 25 | 1.50000 mL | 0.10329 mL | 0.10466 mL | 0.30000 mL | 3.811 | -0.01728 | 0.77590      | 0.00097 | 10.5 s              |
| 25:50.4   | Data point 26 | 1.50000 mL | 0.10329 mL | 0.10590 mL | 0.30000 mL | 3.972 | -0.02006 | 0.98341      | 0.00100 | 33.5 s              |
| 27:04.9   | Data point 27 | 1.50000 mL | 0.10329 mL | 0.10703 mL | 0.30000 mL | 4.138 | -0.01923 | 0.92979      | 0.00098 | 26.0 s              |
| 27:56.3   | Data point 28 | 1.50000 mL | 0.10329 mL | 0.10788 mL | 0.30000 mL | 4.540 | -0.01305 | 0.56589      | 0.00086 | 14.0 s              |
| 28:40.9   | Data point 29 | 1.50000 mL | 0.10329 mL | 0.10826 mL | 0.30000 mL | 4.803 | -0.00985 | 0.36149      | 0.00081 | 12.0 s              |
| 29:18.3   | Data point 30 | 1.50000 mL | 0.10329 mL | 0.10851 mL | 0.30000 mL | 5.255 | -0.01714 | 0.86889      | 0.00091 | 14.5 s              |
| 30:03.2   | Data point 31 | 1.50000 mL | 0.10329 mL | 0.10882 mL | 0.30000 mL | 7.326 | -0.14623 | 0.99588      | 0.00723 | Timed out at 59.5 s |
| 31:33.7   | Data point 32 | 1.50000 mL | 0.10329 mL | 0.10896 mL | 0.30000 mL | 7.576 | -0.08507 | 0.99600      | 0.00421 | Timed out at 59.5 s |
| 33:04.1   | Data point 33 | 1.50000 mL | 0.10329 mL | 0.10903 mL | 0.30000 mL | 7.881 | -0.07193 | 0.99419      | 0.00357 | Timed out at 59.5 s |
| 34:34.5   | Data point 34 | 1.50000 mL | 0.10329 mL | 0.10908 mL | 0.30000 mL | 7.949 | -0.04523 | 0.99327      | 0.00224 | Timed out at 59.5 s |
| 36:05.0   | Data point 35 | 1.50000 mL | 0.10329 mL | 0.10913 mL | 0.30000 mL | 8.208 | -0.03919 | 0.98798      | 0.00195 | Timed out at 59.5 s |
| 37:40.6   | Data point 36 | 1.50000 mL | 0.10329 mL | 0.10920 mL | 0.30000 mL | 8.410 | -0.02748 | 0.97538      | 0.00137 | Timed out at 59.5 s |
| 39:11.0   | Data point 37 | 1.50000 mL | 0.10329 mL | 0.10927 mL | 0.30000 mL | 8.578 | -0.01916 | 0.95293      | 0.00097 | 45.5 s              |
| 40:32.1   | Data point 38 | 1.50000 mL | 0.10329 mL | 0.10936 mL | 0.30000 mL | 8.808 | -0.01860 | 0.93287      | 0.00095 | 40.0 s              |
| 41:42.6   | Data point 39 | 1.50000 mL | 0.10329 mL | 0.10945 mL | 0.30000 mL | 9.007 | -0.01934 | 0.95051      | 0.00098 | 26.0 s              |
| 43:28.9   | Data point 40 | 1.50000 mL | 0.16319 mL | 0.10945 mL | 0.80000 mL | 1.973 | -0.00097 | 0.00987      | 0.00048 | 10.0 s              |
| 44:15.2   | Data point 41 | 1.50000 mL | 0.16319 mL | 0.12869 mL | 0.80000 mL | 2.174 | -0.01641 | 0.68236      | 0.00098 | 10.0 s              |
| 44:50.9   | Data point 42 | 1.50000 mL | 0.16319 mL | 0.14189 mL | 0.80000 mL | 2.382 | -0.00586 | 0.20619      | 0.00064 | 10.0 s              |
| 45:26.6   | Data point 43 | 1.50000 mL | 0.16319 mL | 0.15028 mL | 0.80000 mL | 2.612 | -0.00646 | 0.51998      | 0.00044 | 10.0 s              |
| 46:02.1   | Data point 44 | 1.50000 mL | 0.16319 mL | 0.15562 mL | 0.80000 mL | 2.826 | -0.01012 | 0.47373      | 0.00073 | 10.0 s              |
| 46:37.6   | Data point 45 | 1.50000 mL | 0.16319 mL | 0.15931 mL | 0.80000 mL | 3.047 | -0.00998 | 0.83294      | 0.00054 | 10.5 s              |
| 47:13.6   | Data point 46 | 1.50000 mL | 0.16319 mL | 0.16202 mL | 0.80000 mL | 3.221 | -0.00942 | 0.29407      | 0.00086 | 10.0 s              |
| 47:54.2   | Data point 47 | 1.50000 mL | 0.16319 mL | 0.16373 mL | 0.80000 mL | 3.423 | -0.00386 | 0.10317      | 0.00059 | 10.0 s              |
| 48:39.8   | Data point 48 | 1.50000 mL | 0.16319 mL | 0.16491 mL | 0.80000 mL | 3.619 | -0.00709 | 0.28131      | 0.00066 | 10.0 s              |
| 49:30.7   | Data point 49 | 1.50000 mL | 0.16319 mL | 0.16592 mL | 0.80000 mL | 3.823 | -0.01281 | 0.70214      | 0.00075 | 10.0 s              |
| 50:21.6   | Data point 50 | 1.50000 mL | 0.16319 mL | 0.16667 mL | 0.80000 mL | 4.033 | -0.00051 | 0.00324      | 0.00044 | 10.5 s              |
| 51:12.9   | Data point 51 | 1.50000 mL | 0.16319 mL | 0.16719 mL | 0.80000 mL | 4.236 | -0.00921 | 0.79034      | 0.00051 | 10.5 s              |
| 51:48.8   | Data point 52 | 1.50000 mL | 0.16319 mL | 0.16761 mL | 0.80000 mL | 4.504 | -0.01403 | 0.68052      | 0.00084 | 11.5 s              |
| 52:30.8   | Data point 53 | 1.50000 mL | 0.16319 mL | 0.16792 mL | 0.80000 mL | 4.779 | -0.01789 | 0.81440      | 0.00098 | 25.5 s              |
| 53:26.7   | Data point 54 | 1.50000 mL | 0.16319 mL | 0.16818 mL | 0.80000 mL | 5.161 | -0.01713 | 0.81703      | 0.00093 | 21.5 s              |
| 54:23.9   | Data point 55 | 1.50000 mL | 0.16319 mL | 0.16832 mL | 0.80000 mL | 5.480 | -0.01521 | 0.57942      | 0.00099 | 21.5 s              |
| 55:21.0   | Data point 56 | 1.50000 mL | 0.16319 mL | 0.16842 mL | 0.80000 mL | 5.844 | -0.01837 | 0.87683      | 0.00097 | 30.5 s              |
| 56:22.0   | Data point 57 | 1.50000 mL | 0.16319 mL | 0.16849 mL | 0.80000 mL | 6.198 | -0.01775 | 0.86830      | 0.00094 | 38.0 s              |
| 57:30.5   | Data point 58 | 1.50000 mL | 0.16319 mL | 0.16858 mL | 0.80000 mL | 6.865 | -0.07156 | 0.99469      | 0.00354 | Timed out at 59.5 s |
| 59:00.9   | Data point 59 | 1.50000 mL | 0.16319 mL | 0.16872 mL | 0.80000 mL | 7.887 | -0.09593 | 0.99713      | 0.00475 | Timed out at 59.5 s |
| 1:00:36.6 | Data point 60 | 1.50000 mL | 0.16319 mL | 0.16886 mL | 0.80000 mL | 8.519 | -0.01911 | 0.89364      | 0.00100 | 56.5 s              |
| 1:02:08.7 | Data point 61 | 1.50000 mL | 0.16319 mL | 0.16898 mL | 0.80000 mL | 8.736 | -0.01754 | 0.87325      | 0.00093 | 29.0 s              |
| 1:03:13.4 | Data point 62 | 1.50000 mL | 0.16319 mL | 0.16910 mL | 0.80000 mL | 8.932 | -0.01508 | 0.70146      | 0.00089 | 20.5 s              |
| 1:04:09.5 | Data point 63 | 1.50000 mL | 0.16319 mL | 0.16921 mL | 0.80000 mL | 9.107 | -0.01562 | 0.77923      | 0.00087 | 14.5 s              |
| 1:04:33.0 | Assay volumes | 1.50000 mL | 0.16319 mL | 0.16921 mL | 0.80000 mL |       |          |              |         |                     |

Sample name: **M13\_octanol**  
 Assay name: **pH-metric high logP**  
 Assay ID: **18C-16016**  
 Filename: **C:\Sirius\_T3\Mehtap\20180316\_exp32\_logP\_T3-1\18C-16016\_M13\_octanol\_pH-metric high logP.t3r**

Experiment start time: **3/16/2018 8:34:17 PM**  
 Analyst: **Pion**  
 Instrument ID: **T311053**

## Assay Settings

| Setting                             | Value              | Original Value | Date/Time changed | Imported from |
|-------------------------------------|--------------------|----------------|-------------------|---------------|
| <b>General Settings</b>             |                    |                |                   |               |
| Analyst name                        | Pion               |                |                   |               |
| <b>Standard Experiment Settings</b> |                    |                |                   |               |
| Number of titrations                | 3                  |                |                   |               |
| Minimum pH                          | 2.000              |                |                   |               |
| Maximum pH                          | 9.000              |                |                   |               |
| pH step between points of           | 0.200              |                |                   |               |
| Minimum titrant addition            | 0.00002 mL         |                |                   |               |
| Maximum titrant addition            | 0.10000 mL         |                |                   |               |
| Argon flow rate                     | 100%               |                |                   |               |
| Start titration using               | Cautious pH adjust |                |                   |               |
| <b>Advanced General Settings</b>    |                    |                |                   |               |
| Detect turbidity using              | None               |                |                   |               |
| Collect turbidity sensor data       | No                 |                |                   |               |
| Collect UV spectra                  | No                 |                |                   |               |
| Stir after titrant addition for     | 5 seconds          |                |                   |               |
| For titrant addition, stir at       | 10%                |                |                   |               |
| <b>Titration Pre-Dose</b>           |                    |                |                   |               |
| Titration pre-dose                  | None               |                |                   |               |
| <b>Assay Medium</b>                 |                    |                |                   |               |
| ISA water volume                    | 1.50 mL            |                |                   |               |
| Water added                         | Automatic          |                |                   |               |
| Partition solvent type              | Octanol            |                |                   |               |
| Partition volume                    | 0.100 mL           |                |                   |               |
| Partition solvent added             | Manual in advance  |                |                   |               |
| After partition addition, stir for  | 1 seconds          |                |                   |               |
| <b>Sample Sonication</b>            |                    |                |                   |               |
| Sonicate                            | Yes                |                |                   |               |
| Adjust pH for sonication            | No                 |                |                   |               |
| Sonicate for                        | 60 seconds         |                |                   |               |
| After sonication stir for           | 5 seconds          |                |                   |               |
| <b>Sample Dissolution</b>           |                    |                |                   |               |
| Perform a dissolution stage         | Yes                |                |                   |               |
| Adjust and hold pH for dissolution  | To start pH        |                |                   |               |
| Stir to dissolve for                | 120 seconds        |                |                   |               |
| For dissolution, stir at            | 10%                |                |                   |               |
| <b>Carbonate purge</b>              |                    |                |                   |               |
| Perform a carbonate purge           | No                 |                |                   |               |
| <b>Temperature Control</b>          |                    |                |                   |               |
| Wait for temperature                | Yes                |                |                   |               |
| Required start temperature          | 25.0°C             |                |                   |               |
| Acceptable deviation                | 0.5°C              |                |                   |               |
| Time to wait                        | 60 seconds         |                |                   |               |
| Stir speed of                       | 50%                |                |                   |               |
| <b>Titration 1</b>                  |                    |                |                   |               |
| Titrate from                        | Low to high pH     |                |                   |               |
| Adjust to start pH                  | Yes                |                |                   |               |
| After pH adjust stir for            | 30 seconds         |                |                   |               |
| Stir to allow partitioning for      | 15 seconds         |                |                   |               |
| Stirrer speed for partitioning      | 50%                |                |                   |               |
| <b>Titration 2</b>                  |                    |                |                   |               |
| Titrate from                        | Low to high pH     |                |                   |               |
| Add additional water                | 0.00 mL            |                |                   |               |
| Additional partition solvent volume | 0.200 mL           |                |                   |               |
| Additional partition solvent added  | Automatic          |                |                   |               |
| After pH adjust stir for            | 30 seconds         |                |                   |               |
| Stir to allow partitioning for      | 15 seconds         |                |                   |               |
| Stirrer speed for partitioning      | 55%                |                |                   |               |



Sample name: **M13\_octanol**  
Assay name: **pH-metric high logP**  
Assay ID: **18C-16016**  
Filename: **C:\Sirius\_T3\Mehtap\20180316\_exp32\_logP\_T3-1\18C-16016\_M13\_octanol\_pH-metric high logP.t3r**

Experiment start time: **3/16/2018 8:34:17 PM**  
Analyst: **Pion**  
Instrument ID: **T311053**

## Assay Settings (continued)

| Setting                             | Value          | Original Value | Date/Time changed | Imported from |
|-------------------------------------|----------------|----------------|-------------------|---------------|
| <b>Titration 3</b>                  |                |                |                   |               |
| Titrate from                        | Low to high pH |                |                   |               |
| Add additional water                | 0.00 mL        |                |                   |               |
| Additional partition solvent volume | 0.500 mL       |                |                   |               |
| Additional partition solvent added  | Automatic      |                |                   |               |
| After pH adjust stir for            | 30 seconds     |                |                   |               |
| Stir to allow partitioning for      | 15 seconds     |                |                   |               |
| Stirrer speed for partitioning      | 60%            |                |                   |               |
| <b>Data Point Stability</b>         |                |                |                   |               |
| Stir during data point collection   | No             |                |                   |               |
| Delay before data point collection  | 0 seconds      |                |                   |               |
| Number of points to average         | 20 points      |                |                   |               |
| Time interval between points        | 0.50 seconds   |                |                   |               |
| Required maximum standard deviation | 0.00100 dpH/dt |                |                   |               |
| Stability timeout after             | 60 seconds     |                |                   |               |

## Calibration Settings

| Setting                   | Value  | Date/Time changed    | Imported from             |
|---------------------------|--------|----------------------|---------------------------|
| Four-Plus alpha           | 0.167  | 3/16/2018 8:34:16 PM | C:\Sirius_T3\HCl18C16.t3r |
| Four-Plus S               | 0.9932 | 3/16/2018 8:34:16 PM | C:\Sirius_T3\HCl18C16.t3r |
| Four-Plus jH              | 0.7    | 3/16/2018 8:34:16 PM | C:\Sirius_T3\HCl18C16.t3r |
| Four-Plus jOH             | -0.9   | 3/16/2018 8:34:16 PM | C:\Sirius_T3\HCl18C16.t3r |
| Base concentration factor | 1.010  | 3/16/2018 8:34:17 PM | C:\Sirius_T3\KOH18C16.t3r |
| Acid concentration factor | 0.990  | 3/16/2018 8:34:16 PM | C:\Sirius_T3\HCl18C16.t3r |

## Instrument Settings

| Setting              | Value                      | Batch Id    | Install date          |
|----------------------|----------------------------|-------------|-----------------------|
| Instrument owner     | Merck                      |             |                       |
| Instrument ID        | T311053                    |             |                       |
| Instrument type      | T3 Simulator               |             |                       |
| Software version     | 1.1.3.0                    |             |                       |
| Dispenser module     |                            | T3DM1100253 | 3/31/2009 6:24:52 AM  |
| Dispenser 0          | Water                      |             | 3/31/2009 6:25:05 AM  |
| Syringe volume       | 2.5 mL                     |             |                       |
| Firmware version     | 1.2.1(r2)                  |             |                       |
| Titrant              | Water (0.15 M KCl)         | 2-6-18      | 3/5/2018 11:53:26 AM  |
| Dispenser 2          | Acid                       |             | 3/31/2009 6:25:11 AM  |
| Syringe volume       | 0.5 mL                     |             |                       |
| Firmware version     | 1.2.1(r2)                  |             |                       |
| Titrant              | Acid (0.5 M HCl)           | 03-16-2018  | 3/16/2018 11:26:11 AM |
| Dispenser 1          | Base                       |             | 3/31/2009 6:25:21 AM  |
| Syringe volume       | 0.5 mL                     |             |                       |
| Firmware version     | 1.2.1(r2)                  |             |                       |
| Titrant              | Base (0.5 M KOH)           | 09-22-17    | 3/16/2018 11:19:32 AM |
| Dispenser 5          | Cosolvent                  |             | 3/31/2009 6:26:24 AM  |
| Syringe volume       | 2.5 mL                     |             |                       |
| Firmware version     | 1.2.1(r2)                  |             |                       |
| Distribution valve 5 | Distribution Valve         |             | 3/31/2009 6:28:19 AM  |
| Firmware version     | 1.1.3                      |             |                       |
| Port A               | Methanol (80%, 0.15 M KCl) | 03-16-2018  | 3/16/2018 11:40:37 AM |
| Port B               | Cyclohexane                |             | 1/16/2018 1:42:16 PM  |
| Port C               | MeCN (50%, 0.15 M KCl)     | 10-30-17    | 3/16/2018 11:52:45 AM |
| Dispenser 3          | Buffer                     |             | 8/3/2010 6:05:16 AM   |
| Syringe volume       | 0.5 mL                     |             |                       |
| Firmware version     | 1.2.1(r2)                  |             |                       |
| Titrant              | Dodecane                   | 1-31-2018   | 2/28/2018 10:07:18 AM |



Sample name: **M13\_octanol**  
 Assay name: **pH-metric high logP**  
 Assay ID: **18C-16016**  
 Filename: **C:\Sirius\_T3\Mehtap\20180316\_exp32\_logP\_T3-1\18C-16016\_M13\_octanol\_pH-metric high logP.t3r**

Experiment start time: **3/16/2018 8:34:17 PM**  
 Analyst: **Pion**  
 Instrument ID: **T311053**

## Instrument Settings (continued)

| Setting                                   | Value                      | Batch Id    | Install date           |
|-------------------------------------------|----------------------------|-------------|------------------------|
| Dispenser 6                               | Octanol                    |             | 10/22/2010 11:52:43 AM |
| Syringe volume                            | 0.5 mL                     |             |                        |
| Firmware version                          | 1.2.1(r2)                  |             |                        |
| Titration                                 | Octanol                    | 1-31-2018   | 1/31/2018 5:24:59 PM   |
| Titration                                 |                            | T3TM1100153 | 3/31/2009 6:24:17 AM   |
| Horizontal axis firmware version          | 1.17 AI1DI2DO2 Stepper 2   |             |                        |
| Vertical axis firmware version            | 1.17 AI1DI2DO2 Stepper 2   |             |                        |
| Chassis I/O firmware version              | 1.11 AI1DI0DO4 Norgren I/O |             |                        |
| Probe I/O firmware version                | 1.1.1                      |             |                        |
| Electrode                                 | T3 Electrode               | T3E0769     | 8/15/2017 10:21:54 AM  |
| E0 calibration                            | -10.42 mV                  |             | 3/16/2018 8:34:44 PM   |
| Filling solution                          | 3M KCl                     | KCL095      | 3/16/2018 11:15:26 AM  |
| Liquids                                   |                            |             |                        |
| Wash 1                                    | 50% IPA:50% Water          |             | 3/16/2018 11:15:44 AM  |
| Wash 2                                    | 0.5% Triton X-100 in H2O   |             | 3/16/2018 11:15:47 AM  |
| Buffer position 1                         | pH7 Wash                   |             | 3/16/2018 11:15:49 AM  |
| Buffer position 2                         | pH 7                       |             | 3/16/2018 11:15:51 AM  |
| Storage position                          |                            |             | 3/16/2018 11:16:23 AM  |
| Wash water                                | 4.3e+003 mL                | 2-27-18     | 2/27/2018 10:29:26 AM  |
| Waste                                     | 5.9e+003 mL                |             | 2/27/2018 10:29:30 AM  |
| Temperature controller                    |                            |             | 8/5/2010 7:35:13 AM    |
| Turbidity detector                        |                            |             | 3/31/2009 6:24:45 AM   |
| Spectrometer                              |                            | 072390      | 11/23/2010 12:22:28 PM |
| Dip probe                                 |                            | 11086       |                        |
| Wavelength coefficient A0                 | 185.563                    |             |                        |
| Wavelength coefficient A1                 | 2.17439                    |             |                        |
| Wavelength coefficient A2                 | -0.000285622               |             |                        |
| Total lamp lit time                       | 804:59:49                  |             | 11/23/2010 12:22:28 PM |
| Calibrated on                             | 2/22/2018 5:36:24 PM       |             |                        |
| Integration time                          | 17                         |             |                        |
| Scans averaged                            | 10                         |             |                        |
| Autoloader                                |                            | T3AL1100237 | 11/10/2015 10:34:13 AM |
| Left-right axis firmware version          | 1.17 AI1DI2DO2 Stepper 2   |             |                        |
| Front-back axis firmware version          | 1.17 AI1DI2DO2 Stepper 2   |             |                        |
| Vertical axis firmware version            | 1.17 AI1DI2DO2 Stepper 2   |             |                        |
| Chassis I/O firmware version              | 1.11 AI1DI0DO4 Norgren I/O |             |                        |
| Configuration                             |                            |             |                        |
| Alternate titration position              | Titration position         |             |                        |
| Alternate reference position              | Reference position         |             |                        |
| Maximum standard vial volume              | 3.50 mL                    |             |                        |
| Maximum alternate vial volume             | 25.00 mL                   |             |                        |
| Automatic action idle period              | 5 minute(s)                |             |                        |
| Titration tube volume                     | 1.3 mL                     |             |                        |
| Syringe flush count                       | 3.50                       |             |                        |
| Flowing wash pump volume                  | 20.0 mL                    |             |                        |
| Flowing wash stir duration                | 5 s                        |             |                        |
| Flowing wash stir speed                   | 30%                        |             |                        |
| Solvent wash stir duration                | 5 s                        |             |                        |
| Solvent wash stir speed                   | 30%                        |             |                        |
| Surfactant wash stir duration             | 5 s                        |             |                        |
| Surfactant wash stir speed                | 30%                        |             |                        |
| E0 calibration minimum number of points   | 10                         |             |                        |
| E0 calibration maximum standard deviation | 0.01500                    |             |                        |
| E0 calibration timeout period             | 60 s                       |             |                        |
| E0 calibration stir duration              | 5 s                        |             |                        |
| E0 calibration preparation stir speed     | 30%                        |             |                        |
| E0 calibration buffer wash stir duration  | 5 s                        |             |                        |
| E0 calibration buffer wash stir speed     | 30%                        |             |                        |



## Assay Settings

Sample name: **M13\_octanol** Experiment start time: **3/16/2018 8:34:17 PM**  
Assay name: **pH-metric high logP** Analyst: **Pion**  
Assay ID: **18C-16016** Instrument ID: **T311053**  
Filename: **C:\Sirius\_T3\Mehtap\20180316\_exp32\_logP\_T3-1\18C-16016\_M13\_octanol\_pH-metric high logP.t3r**

### Instrument Settings (continued)

| Setting                                     | Value   | Batch Id | Install date |
|---------------------------------------------|---------|----------|--------------|
| E0 calibration reading stir speed           | 0%      |          |              |
| Spectrometer calibration stir duration      | 5 s     |          |              |
| Spectrometer calibration stir speed         | 30%     |          |              |
| Spectrometer calibration wash pump volume   | 20.0 mL |          |              |
| Spectrometer calibration wash stir duration | 5 s     |          |              |
| Spectrometer calibration wash stir speed    | 30%     |          |              |
| Overhead dispense height                    | 10000   |          |              |

### Refinement Settings

| Setting                        | Value    | Default value |
|--------------------------------|----------|---------------|
| Turbidity detection method     | None     | None          |
| Turbidity wavelength to assess | 500.0 nm | 500.0 nm      |
| Turbidity maximum absorbance   | 0.100    | 0.100         |
| Turbidity probe threshold      | 50.00    | 50.00         |
