# Supplementary material for: Octanol-water partition coefficient measurements for the SAMPL6 Blind Prediction Challenge
Source: bioRxiv or medRxiv preprint supplement (doi:10.1101/757393), 2019-12-02
Supplement: Supplementary file [file media-2.zip]

Sample name: **M18\_octanol**  
 Assay name: **pH-metric high logP**  
 Assay ID: **18C-09016**  
 Filename: **C:\Sirius\_T3\Mehtap\20180309\_exp31\_logP\_T3-2\18C-09016\_M18\_octanol\_pH-metric high logP.t3r**

Experiment start time: **3/9/2018 11:02:44 PM**  
 Analyst: **Pion**  
 Instrument ID: **T312060**

## pH-metric Result

logP (XH2 +) -0.21 ±0.12 (n=50)  
 logP (neutral XH) 2.63 ±0.02 (n=50)  
 logP (X -) 0.46  
 RMSD 0.583

## 18C-09016 Points 2 to 28

M18\_octanol concentration factor 1.091  
 Carbonate 0.1016 mM  
 Acidity error -0.00215 mM

## 18C-09016 Points 29 to 56

M18\_octanol concentration factor 1.051  
 Carbonate 0.0884 mM  
 Acidity error -0.10411 mM

## 18C-09016 Points 57 to 86

M18\_octanol concentration factor 1.063  
 Carbonate 0.1449 mM  
 Acidity error 0.00187 mM

## Warnings and errors

Errors None  
 Warnings None

## Sample logD and percent species

| pH     | M18_octanol<br>logD | M18_octanol<br>M18_octanolH2 | M18_octanol<br>M18_octanolH | M18_octanol<br>M18_octanol | M18_octanol<br>M18_octanolH2* | M18_octanol<br>M18_octanolH* | M18_octanol<br>M18_octanol* | Comment       |
|--------|---------------------|------------------------------|-----------------------------|----------------------------|-------------------------------|------------------------------|-----------------------------|---------------|
| 1.000  | -0.19               | 61.03 %                      | 0.00 %                      | 0.00 %                     | 37.85 %                       | 1.12 %                       | 0.00 %                      | Stomach<br>pH |
| 1.200  | -0.19               | 60.63 %                      | 0.00 %                      | 0.00 %                     | 37.60 %                       | 1.76 %                       | 0.00 %                      |               |
| 2.000  | -0.10               | 55.44 %                      | 0.02 %                      | 0.00 %                     | 34.39 %                       | 10.15 %                      | 0.00 %                      |               |
| 3.000  | 0.39                | 28.95 %                      | 0.12 %                      | 0.00 %                     | 17.95 %                       | 52.98 %                      | 0.00 %                      | Blood pH      |
| 4.000  | 1.26                | 5.01 %                       | 0.21 %                      | 0.00 %                     | 3.11 %                        | 91.67 %                      | 0.00 %                      |               |
| 5.000  | 2.11                | 0.54 %                       | 0.23 %                      | 0.00 %                     | 0.34 %                        | 98.89 %                      | 0.00 %                      |               |
| 6.000  | 2.54                | 0.05 %                       | 0.23 %                      | 0.00 %                     | 0.03 %                        | 99.68 %                      | 0.00 %                      |               |
| 6.500  | 2.60                | 0.02 %                       | 0.23 %                      | 0.00 %                     | 0.01 %                        | 99.74 %                      | 0.00 %                      |               |
| 7.000  | 2.62                | 0.01 %                       | 0.23 %                      | 0.00 %                     | 0.00 %                        | 99.76 %                      | 0.00 %                      |               |
| 7.400  | 2.63                | 0.00 %                       | 0.23 %                      | 0.00 %                     | 0.00 %                        | 99.76 %                      | 0.00 %                      |               |
| 8.000  | 2.63                | 0.00 %                       | 0.23 %                      | 0.00 %                     | 0.00 %                        | 99.76 %                      | 0.00 %                      |               |
| 9.000  | 2.62                | 0.00 %                       | 0.23 %                      | 0.01 %                     | 0.00 %                        | 99.75 %                      | 0.02 %                      |               |
| 10.000 | 2.55                | 0.00 %                       | 0.23 %                      | 0.05 %                     | 0.00 %                        | 99.57 %                      | 0.15 %                      |               |
| 11.000 | 2.13                | 0.00 %                       | 0.23 %                      | 0.51 %                     | 0.00 %                        | 97.79 %                      | 1.47 %                      |               |
| 12.000 | 1.32                | 0.00 %                       | 0.19 %                      | 4.33 %                     | 0.00 %                        | 82.99 %                      | 12.49 %                     |               |

Sample name: **M18\_octanol**  
 Assay name: **pH-metric high logP**  
 Assay ID: **18C-09016**  
 Filename: **C:\Sirius\_T3\Mehtap\20180309\_exp31\_logP\_T3-2\18C-09016\_M18\_octanol\_pH-metric high logP.t3r**

Experiment start time: **3/9/2018 11:02:44 PM**  
 Analyst: **Pion**  
 Instrument ID: **T312060**

## Graphs

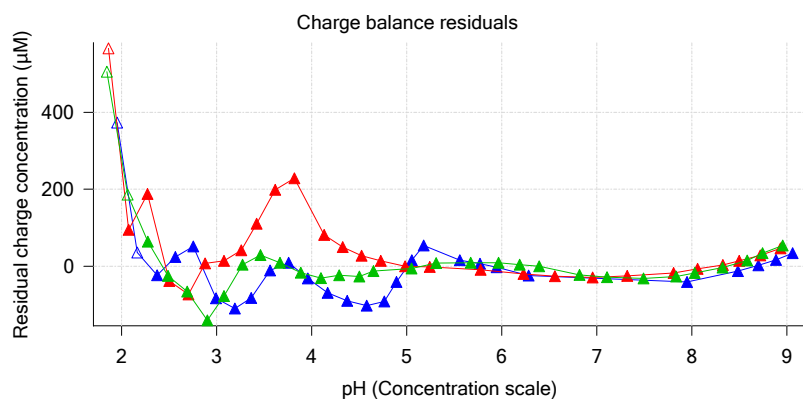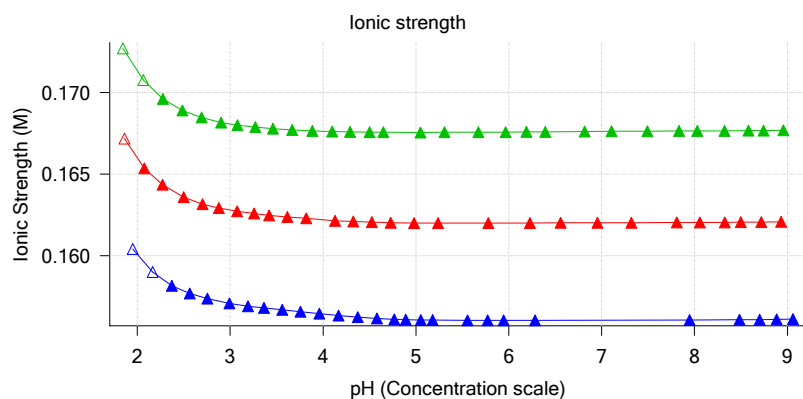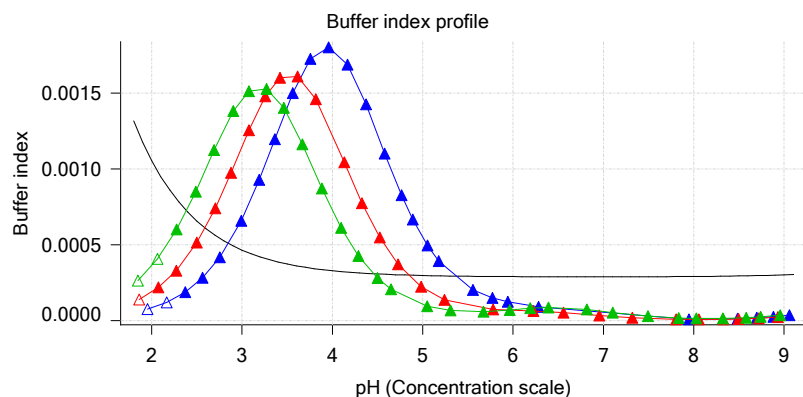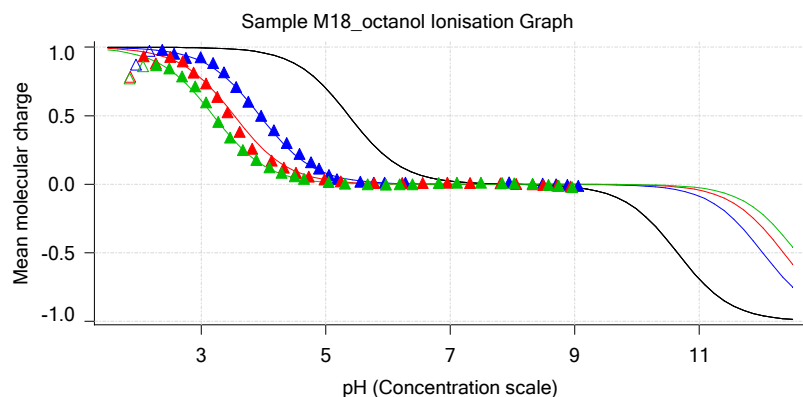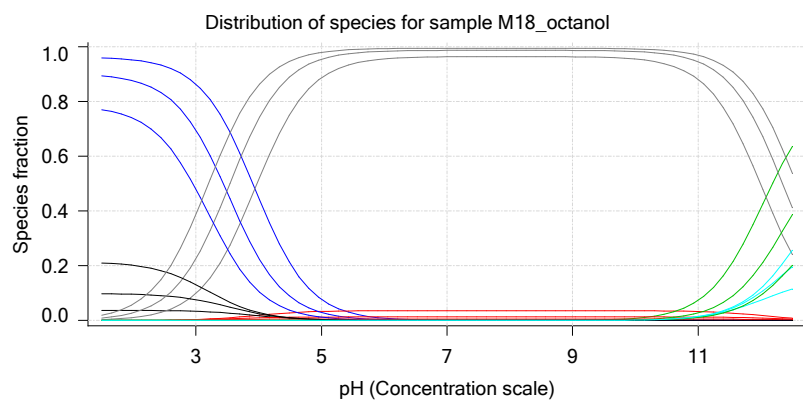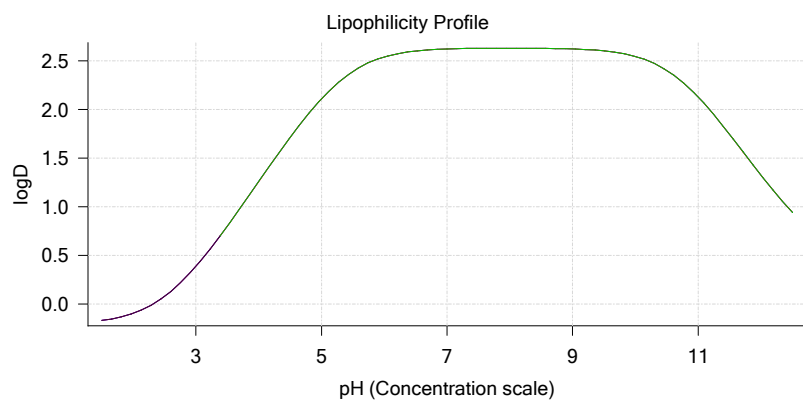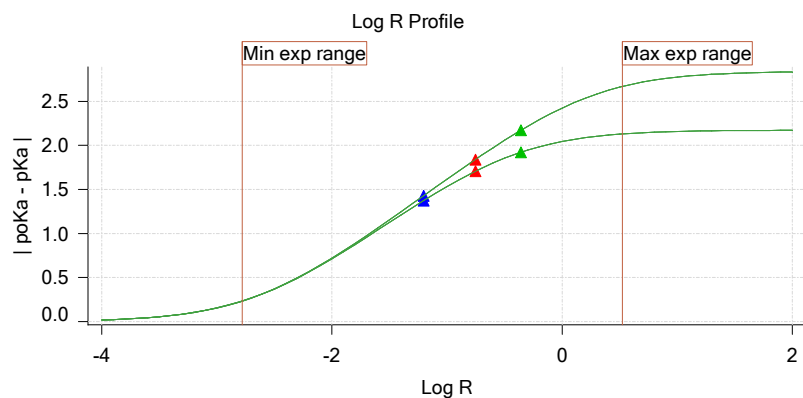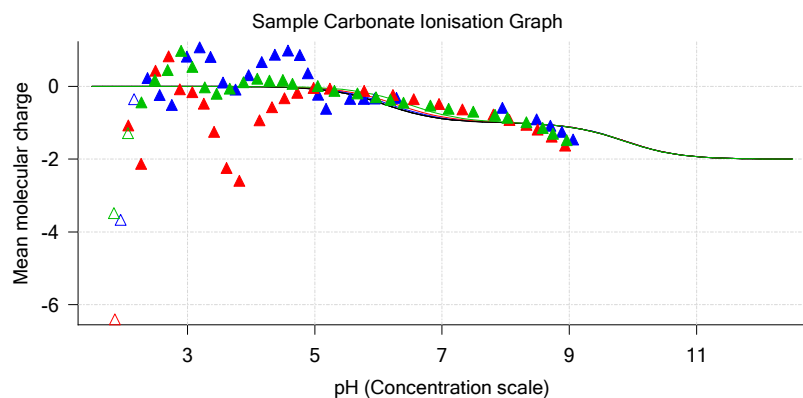

Sample name: **M18\_octanol**  
 Assay name: **pH-metric high logP**  
 Assay ID: **18C-09016**  
 Filename: **C:\Sirius\_T3\Mehtap\20180309\_exp31\_logP\_T3-2\18C-09016\_M18\_octanol\_pH-metric high logP.t3r**

Experiment start time: **3/9/2018 11:02:44 PM**  
 Analyst: **Pion**  
 Instrument ID: **T312060**

## Graphs (continued)

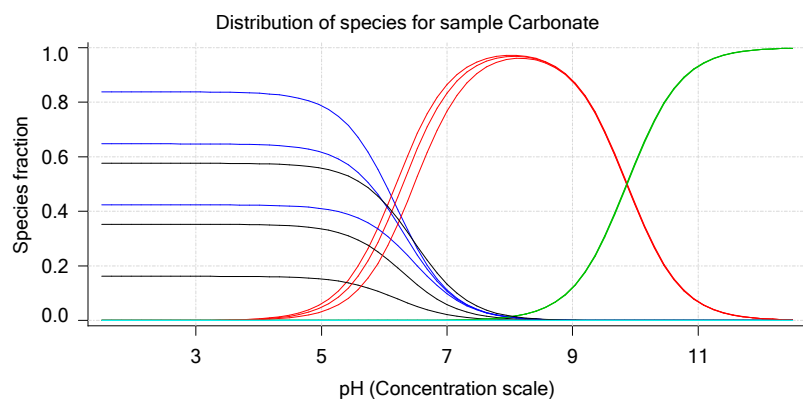

Sample name: **M18\_octanol**  
 Assay name: **pH-metric high logP**  
 Assay ID: **18C-09016**  
 Filename: **C:\Sirius\_T3\Mehtap\20180309\_exp31\_logP\_T3-2\18C-09016\_M18\_octanol\_pH-metric high logP.t3r**

Experiment start time: **3/9/2018 11:02:44 PM**  
 Analyst: **Pion**  
 Instrument ID: **T312060**

## pH-metric high logP Titration 1 of 3 18C-09016 Points 2 to 28

### Overall results

RMSD 0.731  
 Average ionic strength 0.156 M  
 Average temperature 24.9°C  
 Partition ratio 0.0626 : 1  
 Analyte concentration range 2691.8 µM to 2763.3 µM  
 Total points considered 25 of 27

### Warnings and errors

Errors None  
 Warnings None

### Four-Plus parameters

Alpha 0.102 3/9/2018 11:02:43 PM C:\Sirius\_T3\HCl18C09.t3r  
 S 0.9967 3/9/2018 11:02:43 PM C:\Sirius\_T3\HCl18C09.t3r  
 jH 1.2 3/9/2018 11:02:43 PM C:\Sirius\_T3\HCl18C09.t3r  
 jOH 0.0 3/9/2018 11:02:43 PM C:\Sirius\_T3\HCl18C09.t3r

### Titrants

0.50 M HCl 0.999843 3/9/2018 11:02:44 PM C:\Sirius\_T3\HCl18C09.t3r  
 0.50 M KOH 0.999845 3/9/2018 11:02:44 PM C:\Sirius\_T3\KOH18B27.t3r

### Sample

M18\_octanol concentration factor 1.091  
 Base pKa 1 5.37  
 Acid pKa 2 10.65  
 logP (XH<sub>2</sub><sup>+</sup>) -1.02  
 logP (neutral XH) 2.58  
 logP (X<sup>-</sup>) 0.46

### Sample graphs

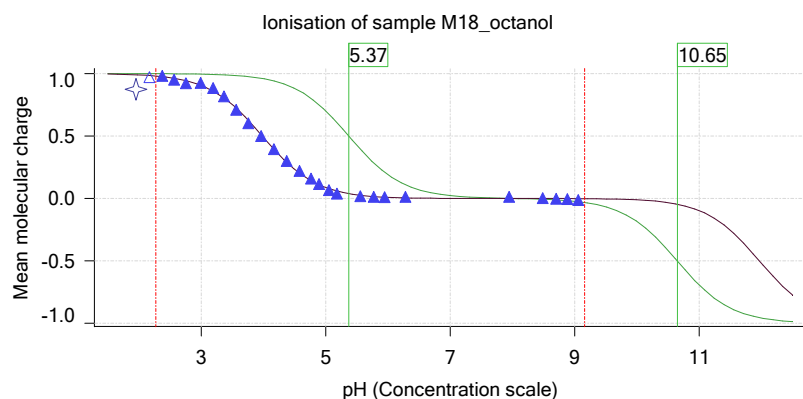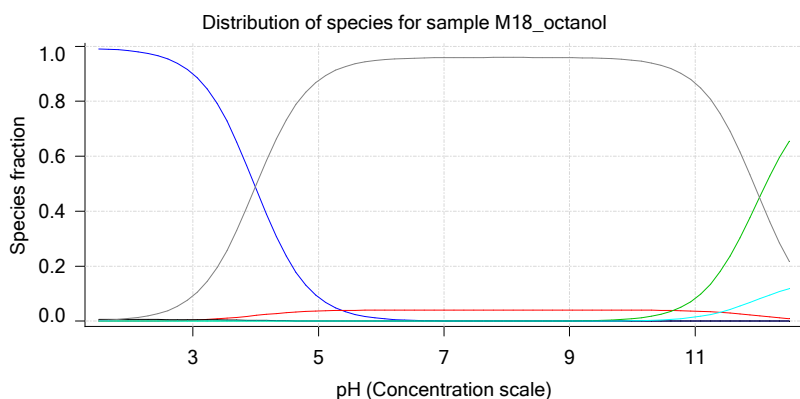

Sample name: **M18\_octanol**  
Assay name: **pH-metric high logP**  
Assay ID: **18C-09016**  
Filename: **C:\Sirius\_T3\Mehtap\20180309\_exp31\_logP\_T3-2\18C-09016\_M18\_octanol\_pH-metric high logP.t3r**

Experiment start time: **3/9/2018 11:02:44 PM**  
Analyst: **Pion**  
Instrument ID: **T312060**

## Sample graphs (continued)

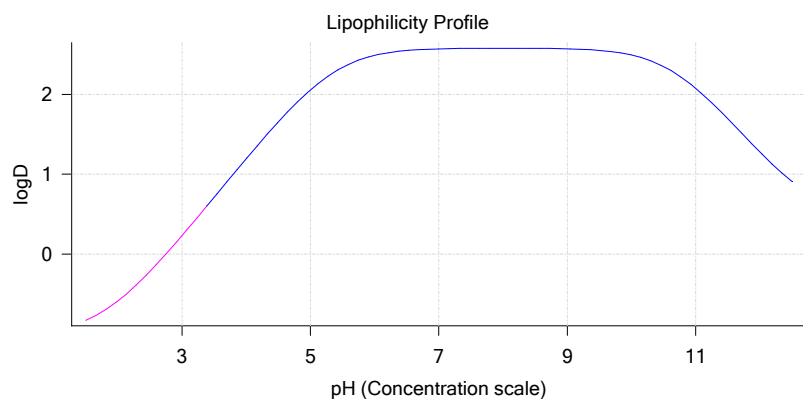

## Sample logD and percent species

| pH     | M18_octanol<br>logD | M18_octanol<br>M18_octanolH2 | M18_octanol<br>M18_octanolH | M18_octanol<br>M18_octanol | M18_octanol<br>M18_octanolH2* | M18_octanol<br>M18_octanolH* | M18_octanol<br>M18_octanol* | Comment       |
|--------|---------------------|------------------------------|-----------------------------|----------------------------|-------------------------------|------------------------------|-----------------------------|---------------|
| 1.000  | -0.95               | 99.30 %                      | 0.00 %                      | 0.00 %                     | 0.60 %                        | 0.10 %                       | 0.00 %                      | Stomach<br>pH |
| 1.200  | -0.91               | 99.24 %                      | 0.01 %                      | 0.00 %                     | 0.60 %                        | 0.16 %                       | 0.00 %                      |               |
| 2.000  | -0.59               | 98.37 %                      | 0.04 %                      | 0.00 %                     | 0.59 %                        | 1.00 %                       | 0.00 %                      |               |
| 3.000  | 0.23                | 89.97 %                      | 0.38 %                      | 0.00 %                     | 0.54 %                        | 9.11 %                       | 0.00 %                      |               |
| 4.000  | 1.19                | 48.52 %                      | 2.07 %                      | 0.00 %                     | 0.29 %                        | 49.12 %                      | 0.00 %                      | Blood pH      |
| 5.000  | 2.06                | 8.65 %                       | 3.69 %                      | 0.00 %                     | 0.05 %                        | 87.60 %                      | 0.00 %                      |               |
| 6.000  | 2.49                | 0.94 %                       | 4.00 %                      | 0.00 %                     | 0.01 %                        | 95.05 %                      | 0.00 %                      |               |
| 6.500  | 2.55                | 0.30 %                       | 4.03 %                      | 0.00 %                     | 0.00 %                        | 95.67 %                      | 0.00 %                      |               |
| 7.000  | 2.57                | 0.09 %                       | 4.04 %                      | 0.00 %                     | 0.00 %                        | 95.86 %                      | 0.00 %                      |               |
| 7.400  | 2.57                | 0.04 %                       | 4.04 %                      | 0.00 %                     | 0.00 %                        | 95.92 %                      | 0.00 %                      |               |
| 8.000  | 2.58                | 0.01 %                       | 4.04 %                      | 0.01 %                     | 0.00 %                        | 95.94 %                      | 0.00 %                      |               |
| 9.000  | 2.57                | 0.00 %                       | 4.04 %                      | 0.09 %                     | 0.00 %                        | 95.85 %                      | 0.02 %                      |               |
| 10.000 | 2.49                | 0.00 %                       | 4.00 %                      | 0.90 %                     | 0.00 %                        | 94.94 %                      | 0.16 %                      |               |
| 11.000 | 2.08                | 0.00 %                       | 3.65 %                      | 8.18 %                     | 0.00 %                        | 86.70 %                      | 1.48 %                      |               |
| 12.000 | 1.28                | 0.00 %                       | 1.95 %                      | 43.76 %                    | 0.00 %                        | 46.39 %                      | 7.90 %                      |               |

## Carbonate and acidity

Carbonate 0.102 mM  
Acidity error -0.002 mM

## Other graphs

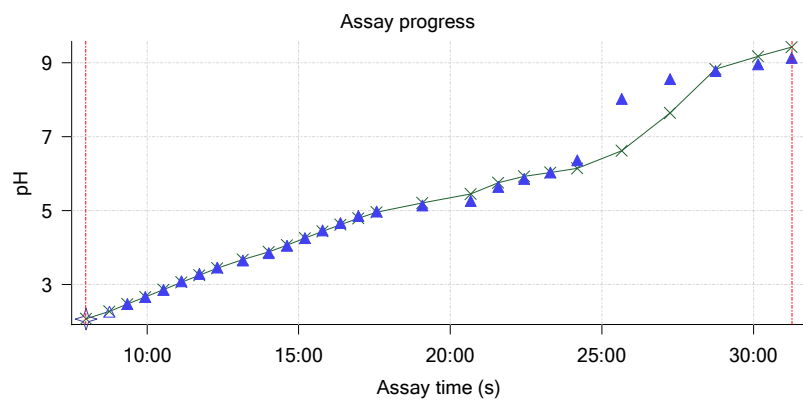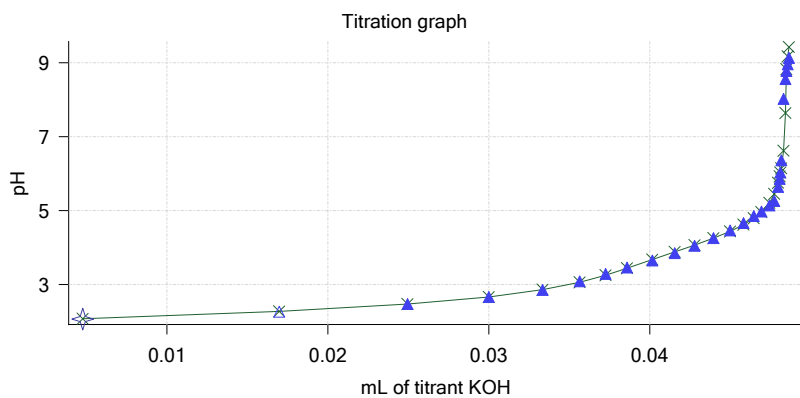

Sample name: **M18\_octanol**  
 Assay name: **pH-metric high logP**  
 Assay ID: **18C-09016**  
 Filename: **C:\Sirius\_T3\Mehtap\20180309\_exp31\_logP\_T3-2\18C-09016\_M18\_octanol\_pH-metric high logP.t3r**

Experiment start time: **3/9/2018 11:02:44 PM**  
 Analyst: **Pion**  
 Instrument ID: **T312060**

## Other graphs (continued)

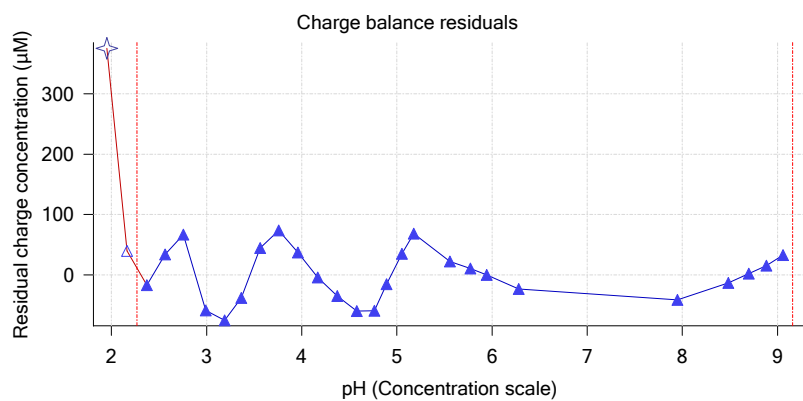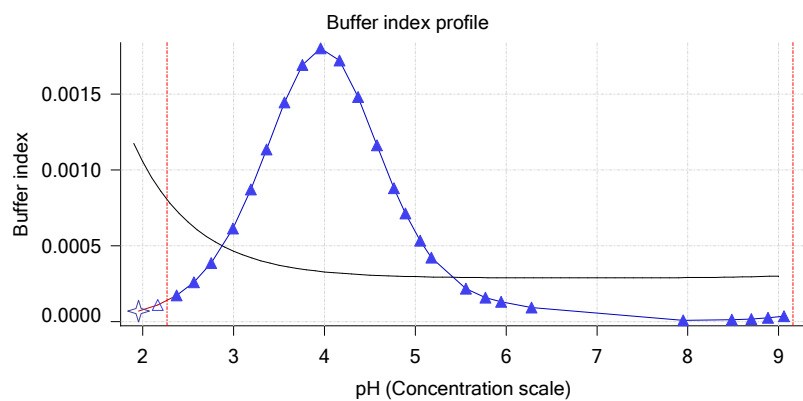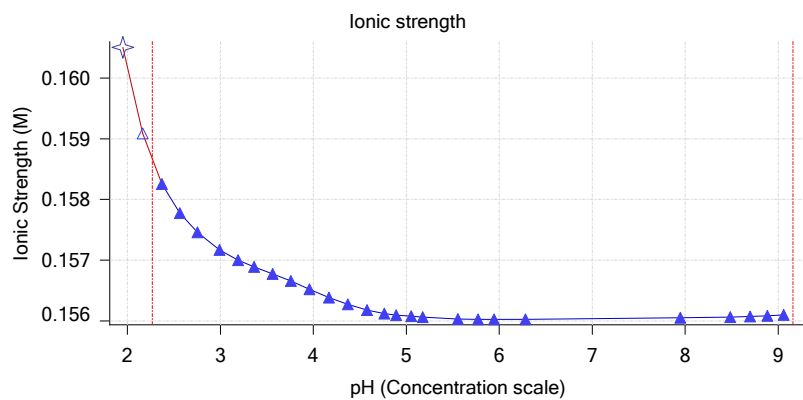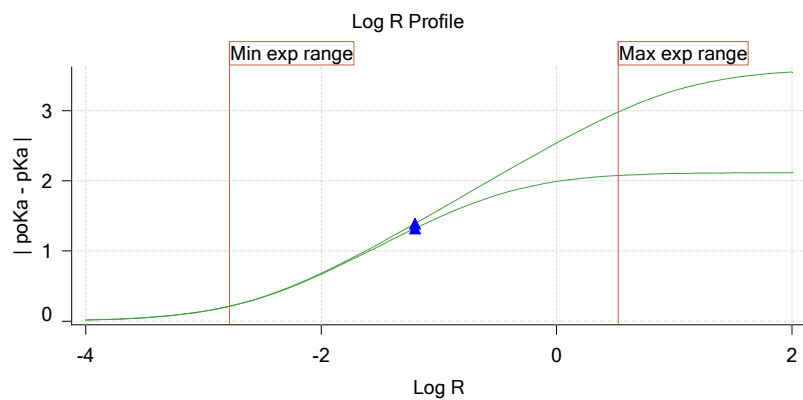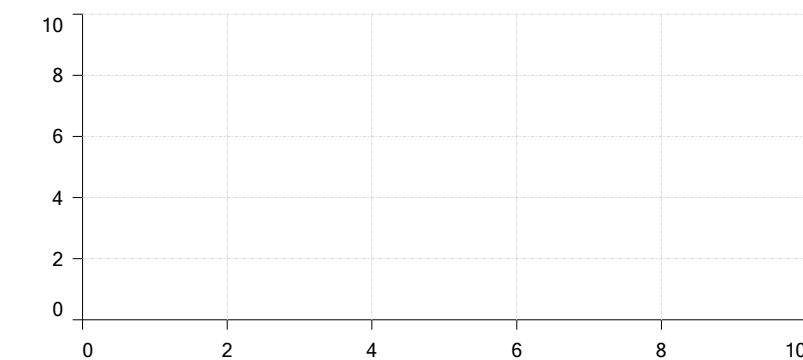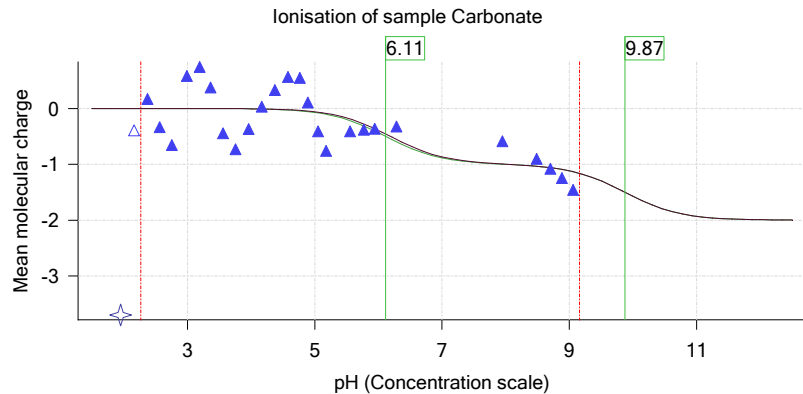

Sample name: **M18\_octanol**  
 Assay name: **pH-metric high logP**  
 Assay ID: **18C-09016**  
 Filename: **C:\Sirius\_T3\Mehtap\20180309\_exp31\_logP\_T3-2\18C-09016\_M18\_octanol\_pH-metric high logP.t3r**

Experiment start time: **3/9/2018 11:02:44 PM**  
 Analyst: **Pion**  
 Instrument ID: **T312060**

## pH-metric high logP Titration 2 of 3 18C-09016 Points 29 to 56

### Overall results

RMSD 0.550  
 Average ionic strength 0.162 M  
 Average temperature 25.0°C  
 Partition ratio 0.1763 : 1  
 Analyte concentration range 2278.7 µM to 2341.3 µM  
 Total points considered 27 of 28

### Warnings and errors

Errors None  
 Warnings One or more logP values out of range

### Four-Plus parameters

Alpha 0.102 3/9/2018 11:02:43 PM C:\Sirius\_T3\HCl18C09.t3r  
 S 0.9967 3/9/2018 11:02:43 PM C:\Sirius\_T3\HCl18C09.t3r  
 jH 1.2 3/9/2018 11:02:43 PM C:\Sirius\_T3\HCl18C09.t3r  
 jOH 0.0 3/9/2018 11:02:43 PM C:\Sirius\_T3\HCl18C09.t3r

### Titrants

0.50 M HCl 0.999843 3/9/2018 11:02:44 PM C:\Sirius\_T3\HCl18C09.t3r  
 0.50 M KOH 0.999845 3/9/2018 11:02:44 PM C:\Sirius\_T3\KOH18B27.t3r

### Sample

M18\_octanol concentration factor 1.051  
 Base pKa 1 5.37  
 Acid pKa 2 10.65  
 logP (XH<sub>2</sub><sup>+</sup>) 7.44  
 logP (neutral XH) 9.35  
 logP (X<sup>-</sup>) 0.46

### Sample graphs

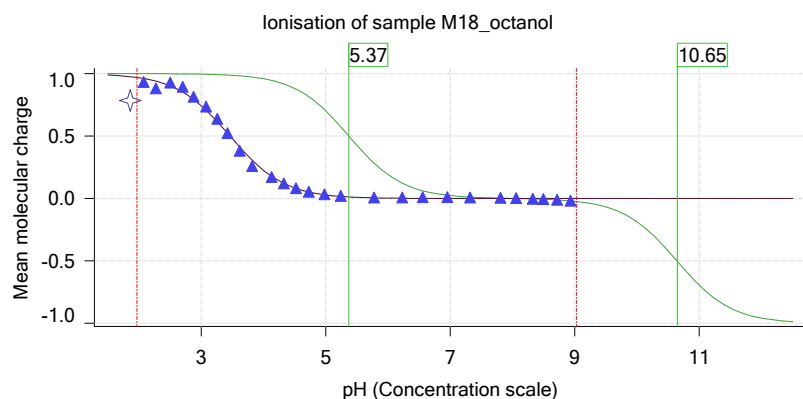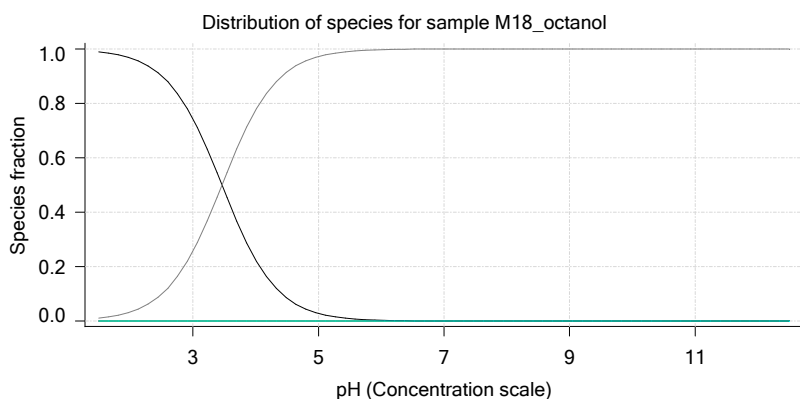

Sample name: **M18\_octanol**  
Assay name: **pH-metric high logP**  
Assay ID: **18C-09016**  
Filename: **C:\Sirius\_T3\Mehtap\20180309\_exp31\_logP\_T3-2\18C-09016\_M18\_octanol\_pH-metric high logP.t3r**

Experiment start time: **3/9/2018 11:02:44 PM**  
Analyst: **Pion**  
Instrument ID: **T312060**

## Sample graphs (continued)

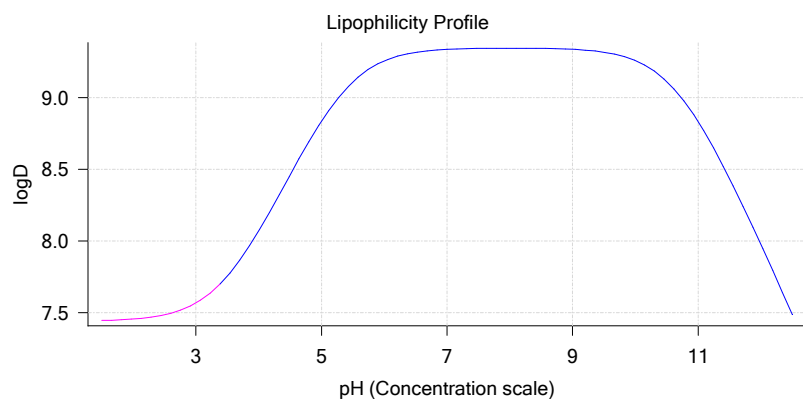

## Sample logD and percent species

| pH     | M18_octanol<br>logD | M18_octanol<br>M18_octanolH2 | M18_octanol<br>M18_octanolH | M18_octanol<br>M18_octanol | M18_octanol<br>M18_octanolH2* | M18_octanol<br>M18_octanolH* | M18_octanol<br>M18_octanol* | Comment       |
|--------|---------------------|------------------------------|-----------------------------|----------------------------|-------------------------------|------------------------------|-----------------------------|---------------|
| 1.000  | 7.44                | 0.00 %                       | 0.00 %                      | 0.00 %                     | 99.66 %                       | 0.34 %                       | 0.00 %                      | Stomach<br>pH |
| 1.200  | 7.44                | 0.00 %                       | 0.00 %                      | 0.00 %                     | 99.46 %                       | 0.54 %                       | 0.00 %                      |               |
| 2.000  | 7.45                | 0.00 %                       | 0.00 %                      | 0.00 %                     | 96.66 %                       | 3.34 %                       | 0.00 %                      |               |
| 3.000  | 7.57                | 0.00 %                       | 0.00 %                      | 0.00 %                     | 74.32 %                       | 25.68 %                      | 0.00 %                      |               |
| 4.000  | 8.07                | 0.00 %                       | 0.00 %                      | 0.00 %                     | 22.45 %                       | 77.55 %                      | 0.00 %                      | Blood pH      |
| 5.000  | 8.84                | 0.00 %                       | 0.00 %                      | 0.00 %                     | 2.81 %                        | 97.19 %                      | 0.00 %                      |               |
| 6.000  | 9.26                | 0.00 %                       | 0.00 %                      | 0.00 %                     | 0.29 %                        | 99.71 %                      | 0.00 %                      |               |
| 6.500  | 9.32                | 0.00 %                       | 0.00 %                      | 0.00 %                     | 0.09 %                        | 99.91 %                      | 0.00 %                      |               |
| 7.000  | 9.34                | 0.00 %                       | 0.00 %                      | 0.00 %                     | 0.03 %                        | 99.97 %                      | 0.00 %                      |               |
| 7.400  | 9.34                | 0.00 %                       | 0.00 %                      | 0.00 %                     | 0.01 %                        | 99.99 %                      | 0.00 %                      |               |
| 8.000  | 9.35                | 0.00 %                       | 0.00 %                      | 0.00 %                     | 0.00 %                        | 100.00 %                     | 0.00 %                      |               |
| 9.000  | 9.34                | 0.00 %                       | 0.00 %                      | 0.00 %                     | 0.00 %                        | 100.00 %                     | 0.00 %                      |               |
| 10.000 | 9.26                | 0.00 %                       | 0.00 %                      | 0.00 %                     | 0.00 %                        | 100.00 %                     | 0.00 %                      |               |
| 11.000 | 8.84                | 0.00 %                       | 0.00 %                      | 0.00 %                     | 0.00 %                        | 100.00 %                     | 0.00 %                      |               |
| 12.000 | 7.98                | 0.00 %                       | 0.00 %                      | 0.00 %                     | 0.00 %                        | 100.00 %                     | 0.00 %                      |               |

## Carbonate and acidity

Carbonate 0.088 mM  
Acidity error -0.104 mM

## Other graphs

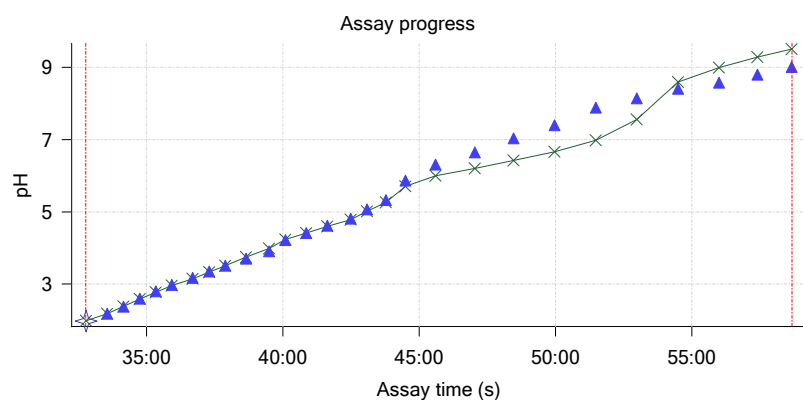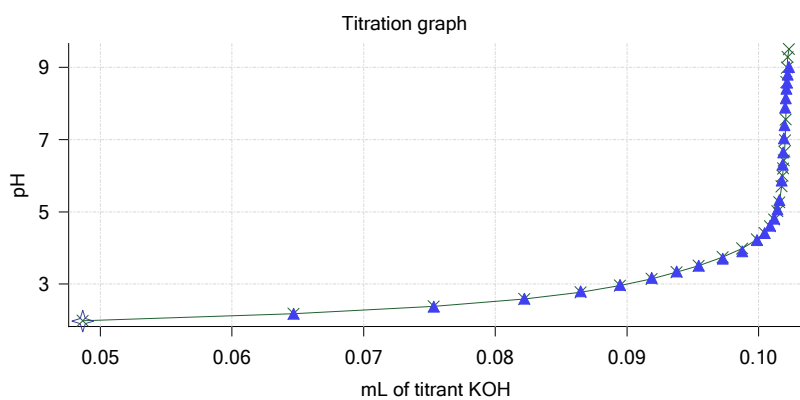



Sample name: **M18\_octanol**  
 Assay name: **pH-metric high logP**  
 Assay ID: **18C-09016**  
 Filename: **C:\Sirius\_T3\Mehtap\20180309\_exp31\_logP\_T3-2\18C-09016\_M18\_octanol\_pH-metric high logP.t3r**

Experiment start time: **3/9/2018 11:02:44 PM**  
 Analyst: **Pion**  
 Instrument ID: **T312060**

## Other graphs (continued)

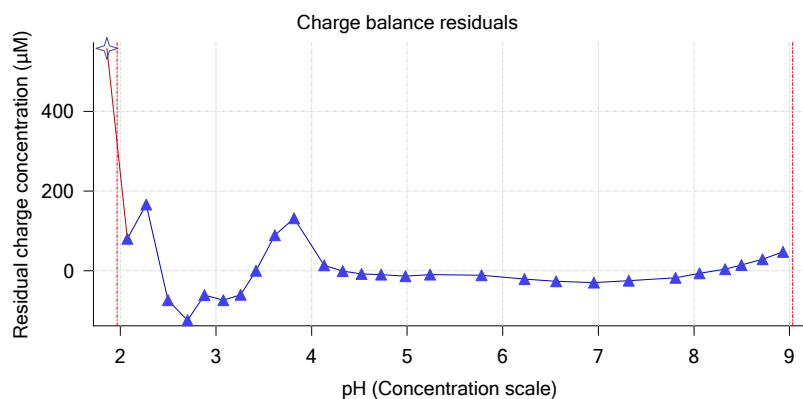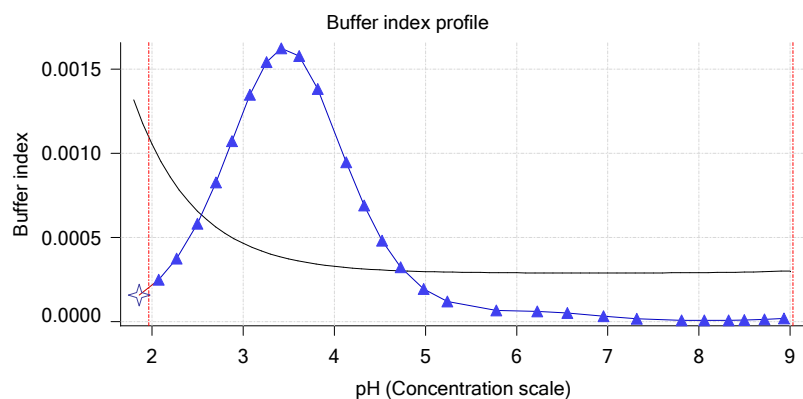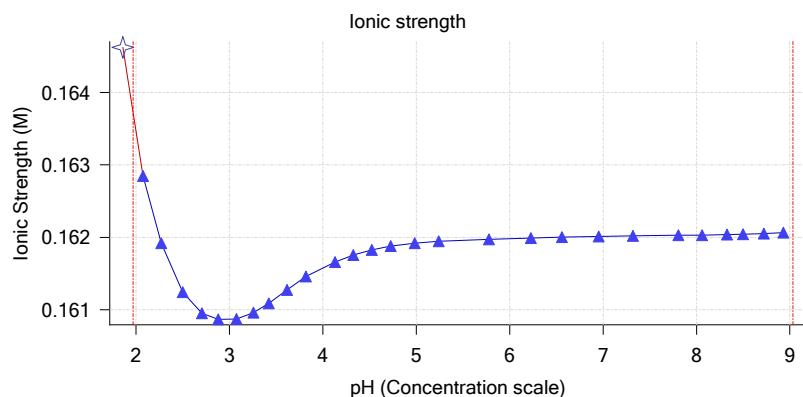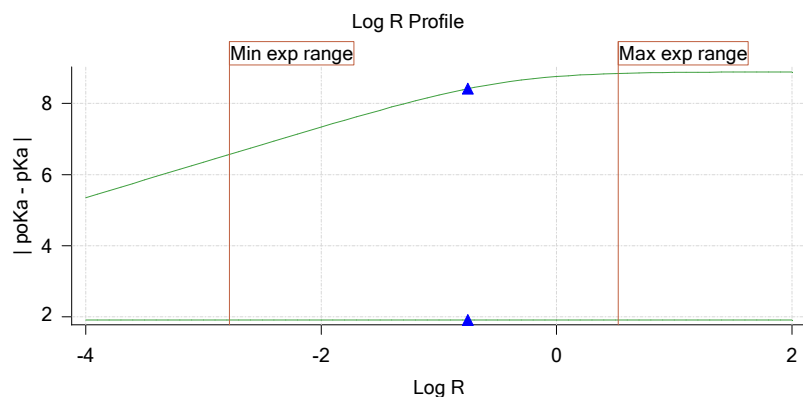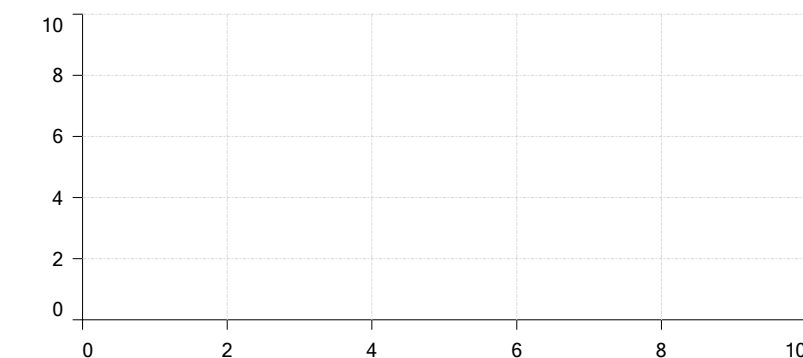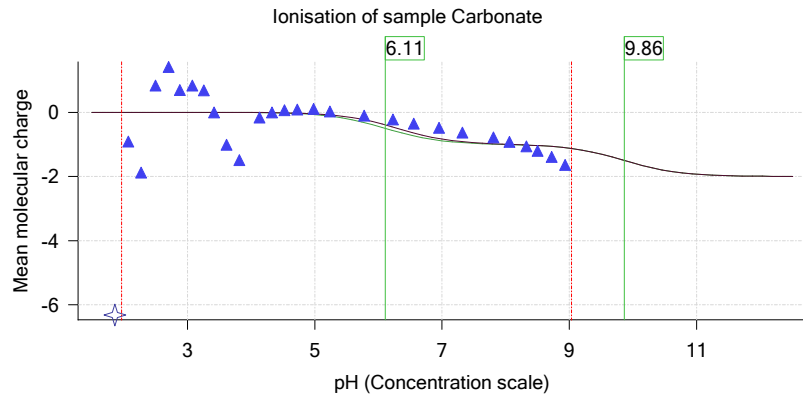

Sample name: **M18\_octanol**  
 Assay name: **pH-metric high logP**  
 Assay ID: **18C-09016**  
 Filename: **C:\Sirius\_T3\Mehtap\20180309\_exp31\_logP\_T3-2\18C-09016\_M18\_octanol\_pH-metric high logP.t3r**

Experiment start time: **3/9/2018 11:02:44 PM**  
 Analyst: **Pion**  
 Instrument ID: **T312060**

pH-metric high logP Titration 3 of 3 18C-09016 Points 57 to 86

## Overall results

RMSD 0.447  
 Average ionic strength 0.168 M  
 Average temperature 25.0°C  
 Partition ratio 0.4400 : 1  
 Analyte concentration range 1742.6 µM to 1782.5 µM  
 Total points considered 28 of 30

## Warnings and errors

Errors None  
 Warnings One or more logP values out of range

## Four-Plus parameters

Alpha 0.102 3/9/2018 11:02:43 PM C:\Sirius\_T3\HCl18C09.t3r  
 S 0.9967 3/9/2018 11:02:43 PM C:\Sirius\_T3\HCl18C09.t3r  
 jH 1.2 3/9/2018 11:02:43 PM C:\Sirius\_T3\HCl18C09.t3r  
 jOH 0.0 3/9/2018 11:02:43 PM C:\Sirius\_T3\HCl18C09.t3r

## Titrants

0.50 M HCl 0.999843 3/9/2018 11:02:44 PM C:\Sirius\_T3\HCl18C09.t3r  
 0.50 M KOH 0.999845 3/9/2018 11:02:44 PM C:\Sirius\_T3\KOH18B27.t3r

## Sample

M18\_octanol concentration factor 1.063  
 Base pKa 1 5.37  
 Acid pKa 2 10.65  
 logP (XH<sub>2</sub><sup>+</sup>) -3.10  
 logP (neutral XH) 2.50  
 logP (X<sup>-</sup>) 0.46

## Sample graphs

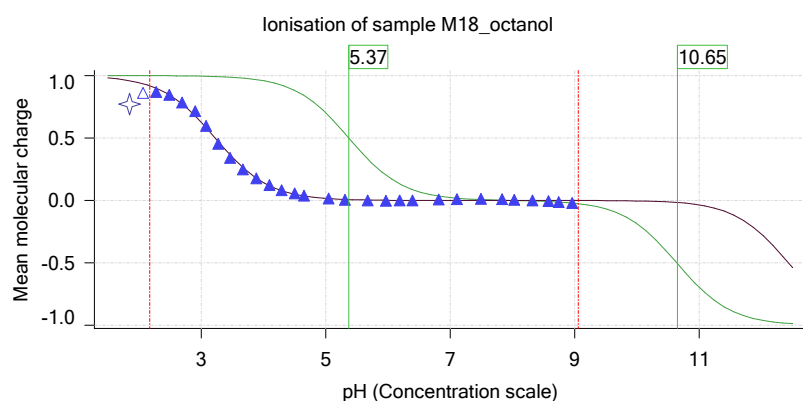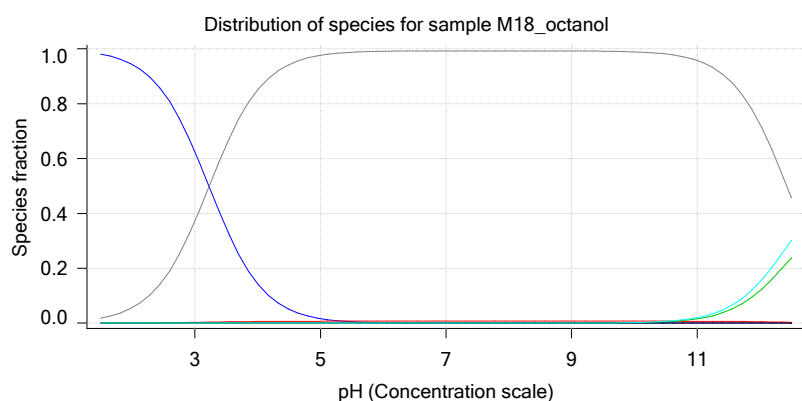

Sample name: **M18\_octanol**  
 Assay name: **pH-metric high logP**  
 Assay ID: **18C-09016**  
 Filename: **C:\Sirius\_T3\Mehtap\20180309\_exp31\_logP\_T3-2\18C-09016\_M18\_octanol\_pH-metric high logP.t3r**

Experiment start time: **3/9/2018 11:02:44 PM**  
 Analyst: **Pion**  
 Instrument ID: **T312060**

## Sample graphs (continued)

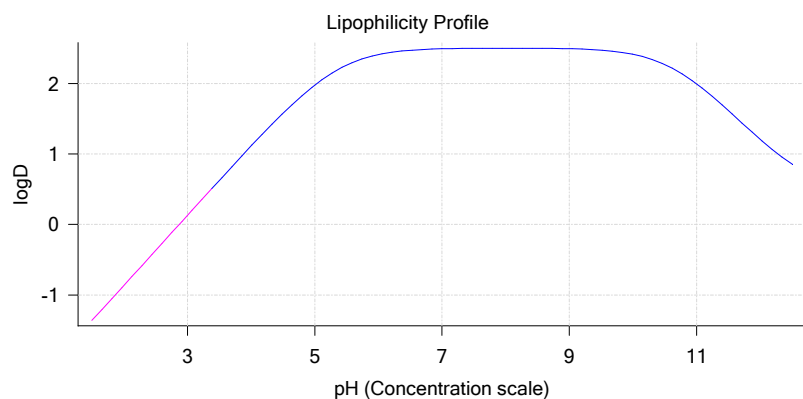

## Sample logD and percent species

| pH     | M18_octanol<br>logD | M18_octanol<br>M18_octanolH2 | M18_octanol<br>M18_octanolH | M18_octanol<br>M18_octanol | M18_octanol<br>M18_octanolH2* | M18_octanol<br>M18_octanolH* | M18_octanol<br>M18_octanol* | Comment       |
|--------|---------------------|------------------------------|-----------------------------|----------------------------|-------------------------------|------------------------------|-----------------------------|---------------|
| 1.000  | -1.84               | 99.37 %                      | 0.00 %                      | 0.00 %                     | 0.04 %                        | 0.59 %                       | 0.00 %                      | Stomach<br>pH |
| 1.200  | -1.65               | 99.02 %                      | 0.01 %                      | 0.00 %                     | 0.03 %                        | 0.94 %                       | 0.00 %                      |               |
| 2.000  | -0.87               | 94.30 %                      | 0.04 %                      | 0.00 %                     | 0.03 %                        | 5.63 %                       | 0.00 %                      |               |
| 3.000  | 0.13                | 62.45 %                      | 0.27 %                      | 0.00 %                     | 0.02 %                        | 37.26 %                      | 0.00 %                      |               |
| 4.000  | 1.11                | 14.26 %                      | 0.61 %                      | 0.00 %                     | 0.01 %                        | 85.12 %                      | 0.00 %                      | Blood pH      |
| 5.000  | 1.98                | 1.64 %                       | 0.70 %                      | 0.00 %                     | 0.00 %                        | 97.66 %                      | 0.00 %                      |               |
| 6.000  | 2.41                | 0.17 %                       | 0.71 %                      | 0.00 %                     | 0.00 %                        | 99.13 %                      | 0.00 %                      |               |
| 6.500  | 2.47                | 0.05 %                       | 0.71 %                      | 0.00 %                     | 0.00 %                        | 99.24 %                      | 0.00 %                      |               |
| 7.000  | 2.49                | 0.02 %                       | 0.71 %                      | 0.00 %                     | 0.00 %                        | 99.27 %                      | 0.00 %                      |               |
| 7.400  | 2.50                | 0.01 %                       | 0.71 %                      | 0.00 %                     | 0.00 %                        | 99.28 %                      | 0.00 %                      |               |
| 8.000  | 2.50                | 0.00 %                       | 0.71 %                      | 0.00 %                     | 0.00 %                        | 99.28 %                      | 0.00 %                      |               |
| 9.000  | 2.49                | 0.00 %                       | 0.71 %                      | 0.02 %                     | 0.00 %                        | 99.25 %                      | 0.02 %                      |               |
| 10.000 | 2.42                | 0.00 %                       | 0.71 %                      | 0.16 %                     | 0.00 %                        | 98.93 %                      | 0.20 %                      |               |
| 11.000 | 2.00                | 0.00 %                       | 0.69 %                      | 1.53 %                     | 0.00 %                        | 95.84 %                      | 1.95 %                      |               |
| 12.000 | 1.21                | 0.00 %                       | 0.52 %                      | 11.68 %                    | 0.00 %                        | 72.98 %                      | 14.82 %                     |               |

## Carbonate and acidity

Carbonate 0.145 mM  
 Acidity error 0.002 mM

## Other graphs

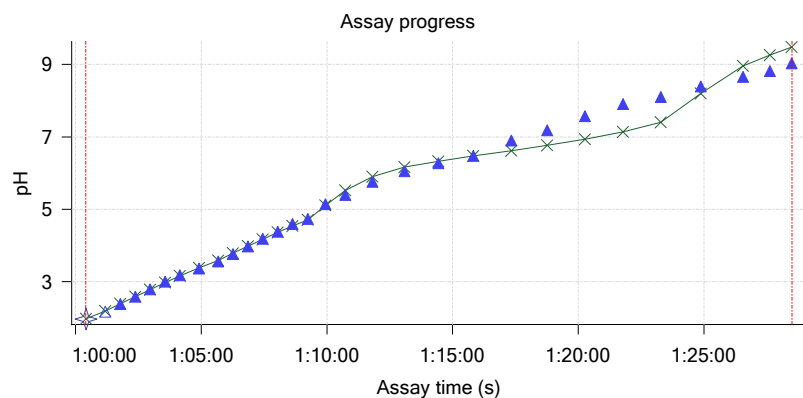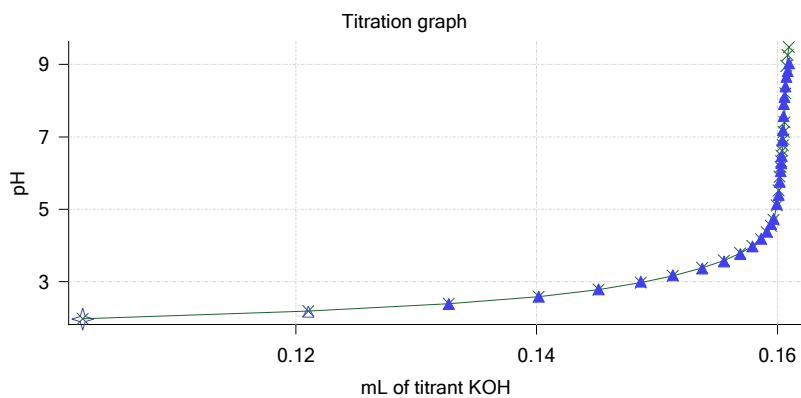

Sample name: **M18\_octanol**  
 Assay name: **pH-metric high logP**  
 Assay ID: **18C-09016**  
 Filename: **C:\Sirius\_T3\Mehtap\20180309\_exp31\_logP\_T3-2\18C-09016\_M18\_octanol\_pH-metric high logP.t3r**

Experiment start time: **3/9/2018 11:02:44 PM**  
 Analyst: **Pion**  
 Instrument ID: **T312060**

## Other graphs (continued)

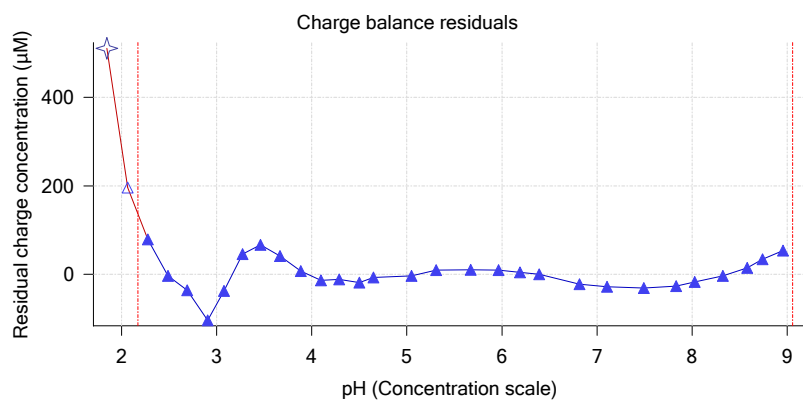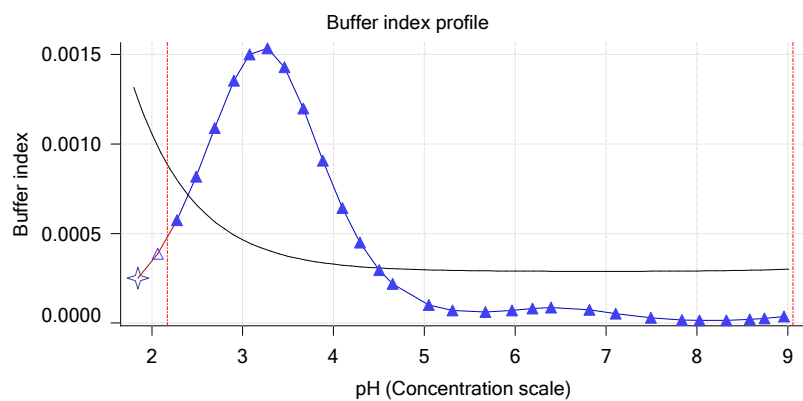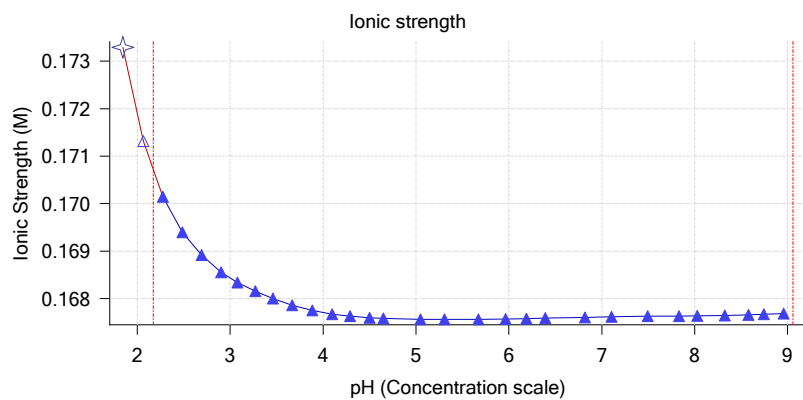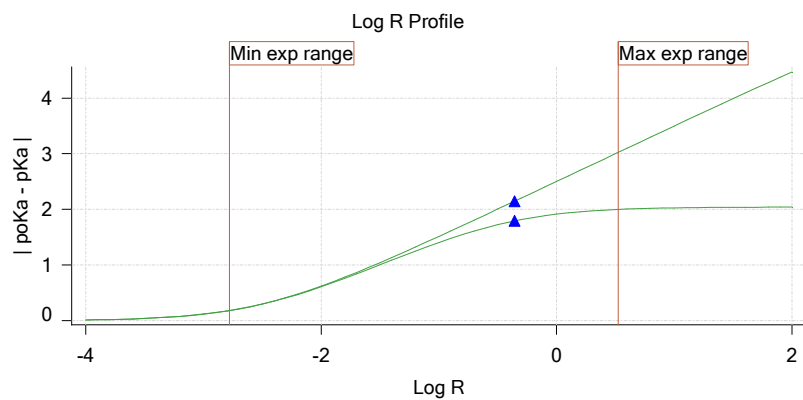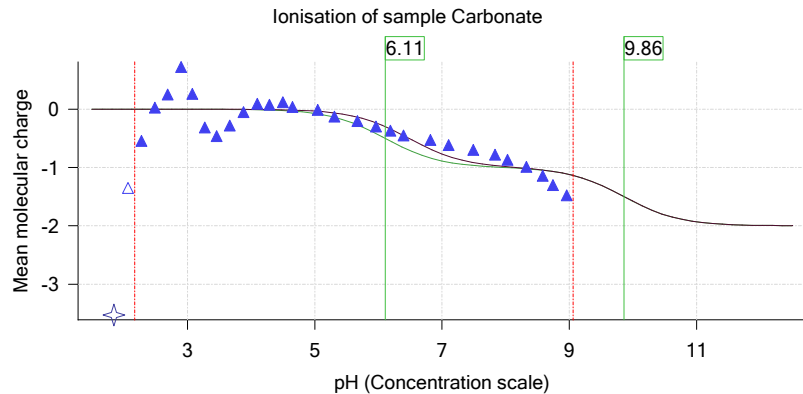

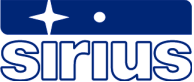

## Assay model

Sample name: **M18\_octanol** Experiment start time: **3/9/2018 11:02:44 PM**  
Assay name: **pH-metric high logP** Analyst: **Pion**  
Assay ID: **18C-09016** Instrument ID: **T312060**  
Filename: **C:\Sirius\_T3\Mehtap\20180309\_exp31\_logP\_T3-2\18C-09016\_M18\_octanol\_pH-metric high logP.t3r**

## Assay Model

| Settings                          | Value        | Date/Time changed    | Imported from      |
|-----------------------------------|--------------|----------------------|--------------------|
| Sample name                       | M18_octanol  | 2/27/2018 7:08:39 PM | User entered value |
| Sample by                         | Weight       |                      | Default value      |
| Sample weight                     | 0.001220 g   | 3/9/2018 2:22:52 PM  | User entered value |
| Formula weight                    | 267.11 g/mol | 2/27/2018 7:08:39 PM | User entered value |
| Solubility                        | Unknown      |                      | Default value      |
| Molecular weight                  | 267.11       | 2/27/2018 7:08:39 PM | User entered value |
| Individual pKa ionic environments | No           |                      | Default value      |
| Number of pKas                    | 2            | 2/27/2018 7:08:39 PM | User entered value |
| Sample is a                       | Ampholyte    | 2/27/2018 7:08:39 PM | User entered value |
| pKa 1                             | 5.37         | 2/27/2018 7:08:39 PM | User entered value |
| Type                              | Base         | 2/27/2018 7:08:39 PM | User entered value |
| pKa 2                             | 10.65        | 2/27/2018 7:08:39 PM | User entered value |
| Type                              | Acid         | 2/27/2018 7:08:39 PM | User entered value |
| logp (XH <sub>2</sub> +)          | -0.35        | 2/28/2018 3:20:28 PM | User entered value |
| logP (neutral XH)                 | 2.57         | 3/2/2018 4:34:50 PM  | User entered value |
| logP (X -)                        | 0.46         | 2/27/2018 7:09:34 PM | User entered value |

## Events

| Time    | Event                  | Water      | Acid       | Base       | Octanol    | pH    | dpH/dt   | pH R-squared | pH SD   | dpH/<br>time      |
|---------|------------------------|------------|------------|------------|------------|-------|----------|--------------|---------|-------------------|
| 4:58.7  | Manual volume addition |            |            |            | 0.10000 mL |       |          |              |         |                   |
| 4:59.8  | Initial pH = 7.99      |            |            |            |            |       |          |              |         |                   |
| 7:59.3  | Data point 2           | 1.50000 mL | 0.04812 mL | 0.00477 mL | 0.10000 mL | 2.062 | -0.00681 | 0.27502      | 0.00064 | 10.0<br>s         |
| 8:45.5  | Data point 3           | 1.50000 mL | 0.04812 mL | 0.01698 mL | 0.10000 mL | 2.268 | 0.00821  | 0.44883      | 0.00061 | 10.0<br>s         |
| 9:21.1  | Data point 4           | 1.50000 mL | 0.04812 mL | 0.02495 mL | 0.10000 mL | 2.471 | -0.00977 | 0.70424      | 0.00058 | 10.0<br>s         |
| 9:56.6  | Data point 5           | 1.50000 mL | 0.04812 mL | 0.03001 mL | 0.10000 mL | 2.662 | -0.00069 | 0.07464      | 0.00012 | 10.0<br>s         |
| 10:32.1 | Data point 6           | 1.50000 mL | 0.04812 mL | 0.03335 mL | 0.10000 mL | 2.850 | -0.00288 | 0.33859      | 0.00024 | 10.0<br>s         |
| 11:07.6 | Data point 7           | 1.50000 mL | 0.04812 mL | 0.03565 mL | 0.10000 mL | 3.085 | -0.01383 | 0.83922      | 0.00074 | 10.0<br>s         |
| 11:43.3 | Data point 8           | 1.50000 mL | 0.04812 mL | 0.03725 mL | 0.10000 mL | 3.283 | -0.00418 | 0.74326      | 0.00024 | 10.0<br>s         |
| 12:18.8 | Data point 9           | 1.50000 mL | 0.04812 mL | 0.03859 mL | 0.10000 mL | 3.456 | -0.01450 | 0.85812      | 0.00077 | 10.0<br>s         |
| 13:09.7 | Data point 10          | 1.50000 mL | 0.04812 mL | 0.04017 mL | 0.10000 mL | 3.653 | -0.01030 | 0.40559      | 0.00080 | 10.0<br>s         |
| 14:00.8 | Data point 11          | 1.50000 mL | 0.04812 mL | 0.04156 mL | 0.10000 mL | 3.848 | -0.00945 | 0.70466      | 0.00056 | 10.5<br>s         |
| 14:36.7 | Data point 12          | 1.50000 mL | 0.04812 mL | 0.04278 mL | 0.10000 mL | 4.049 | -0.00976 | 0.86426      | 0.00052 | 10.0<br>s         |
| 15:12.1 | Data point 13          | 1.50000 mL | 0.04812 mL | 0.04396 mL | 0.10000 mL | 4.256 | -0.00996 | 0.79638      | 0.00055 | 10.0<br>s         |
| 15:47.4 | Data point 14          | 1.50000 mL | 0.04812 mL | 0.04499 mL | 0.10000 mL | 4.460 | -0.01429 | 0.84980      | 0.00077 | 10.0<br>s         |
| 16:22.8 | Data point 15          | 1.50000 mL | 0.04812 mL | 0.04584 mL | 0.10000 mL | 4.667 | -0.01676 | 0.72668      | 0.00097 | 10.0<br>s         |
| 16:58.2 | Data point 16          | 1.50000 mL | 0.04812 mL | 0.04647 mL | 0.10000 mL | 4.852 | -0.01624 | 0.82288      | 0.00088 | 10.5<br>s         |
| 17:34.1 | Data point 17          | 1.50000 mL | 0.04812 mL | 0.04694 mL | 0.10000 mL | 4.977 | -0.06194 | 0.99731      | 0.00306 | Time<br>out<br>at |

Sample name: **M18\_octanol**  
 Assay name: **pH-metric high logP**  
 Assay ID: **18C-09016**  
 Filename: **C:\Sirius\_T3\Mehtap\20180309\_exp31\_logP\_T3-2\18C-09016\_M18\_octanol\_pH-metric high logP.t3r**

Experiment start time: **3/9/2018 11:02:44 PM**  
 Analyst: **Pion**  
 Instrument ID: **T312060**

## Events (continued)

| Time      | Event         | Water      | Acid       | Base       | Octanol    | pH    | dpH/dt   | pH R-squared | pH SD   | dpH/dt time         |
|-----------|---------------|------------|------------|------------|------------|-------|----------|--------------|---------|---------------------|
| 19:04.6   | Data point 18 | 1.50000 mL | 0.04812 mL | 0.04744 mL | 0.10000 mL | 5.138 | -0.02805 | 0.99638      | 0.00139 | Timed out at 59.5 s |
| 20:40.3   | Data point 19 | 1.50000 mL | 0.04812 mL | 0.04774 mL | 0.10000 mL | 5.264 | -0.01845 | 0.96248      | 0.00093 | 29.0 s              |
| 21:34.7   | Data point 20 | 1.50000 mL | 0.04812 mL | 0.04798 mL | 0.10000 mL | 5.641 | -0.01992 | 0.97402      | 0.00100 | 21.0 s              |
| 22:26.3   | Data point 21 | 1.50000 mL | 0.04812 mL | 0.04807 mL | 0.10000 mL | 5.855 | -0.01912 | 0.93098      | 0.00098 | 26.5 s              |
| 23:18.2   | Data point 22 | 1.50000 mL | 0.04812 mL | 0.04812 mL | 0.10000 mL | 6.027 | -0.01851 | 0.97469      | 0.00093 | 27.5 s              |
| 24:11.1   | Data point 23 | 1.50000 mL | 0.04812 mL | 0.04817 mL | 0.10000 mL | 6.363 | -0.01958 | 0.96477      | 0.00099 | 57.5 s              |
| 25:39.1   | Data point 24 | 1.50000 mL | 0.04812 mL | 0.04831 mL | 0.10000 mL | 8.024 | -0.07733 | 0.99662      | 0.00383 | Timed out at 59.5 s |
| 27:14.7   | Data point 25 | 1.50000 mL | 0.04812 mL | 0.04842 mL | 0.10000 mL | 8.560 | -0.02632 | 0.98996      | 0.00131 | Timed out at 59.5 s |
| 28:45.1   | Data point 26 | 1.50000 mL | 0.04812 mL | 0.04849 mL | 0.10000 mL | 8.774 | -0.02007 | 0.98634      | 0.00100 | 48.0 s              |
| 30:08.9   | Data point 27 | 1.50000 mL | 0.04812 mL | 0.04857 mL | 0.10000 mL | 8.957 | -0.01923 | 0.96603      | 0.00097 | 36.0 s              |
| 31:15.5   | Data point 28 | 1.50000 mL | 0.04812 mL | 0.04866 mL | 0.10000 mL | 9.132 | -0.01929 | 0.95230      | 0.00098 | 29.0 s              |
| 32:47.3   | Data point 29 | 1.50000 mL | 0.10212 mL | 0.04866 mL | 0.30000 mL | 1.972 | 0.00050  | 0.00545      | 0.00033 | 10.5 s              |
| 33:34.0   | Data point 30 | 1.50000 mL | 0.10212 mL | 0.06468 mL | 0.30000 mL | 2.179 | -0.01398 | 0.77392      | 0.00078 | 10.0 s              |
| 34:09.7   | Data point 31 | 1.50000 mL | 0.10212 mL | 0.07533 mL | 0.30000 mL | 2.373 | 0.00146  | 0.41139      | 0.00011 | 10.0 s              |
| 34:45.3   | Data point 32 | 1.50000 mL | 0.10212 mL | 0.08220 mL | 0.30000 mL | 2.598 | -0.00003 | 0.00017      | 0.00012 | 10.0 s              |
| 35:20.8   | Data point 33 | 1.50000 mL | 0.10212 mL | 0.08648 mL | 0.30000 mL | 2.799 | -0.00882 | 0.36125      | 0.00072 | 10.0 s              |
| 35:56.2   | Data point 34 | 1.50000 mL | 0.10212 mL | 0.08946 mL | 0.30000 mL | 2.973 | -0.00669 | 0.54661      | 0.00045 | 10.0 s              |
| 36:42.0   | Data point 35 | 1.50000 mL | 0.10212 mL | 0.09186 mL | 0.30000 mL | 3.170 | -0.01175 | 0.75450      | 0.00067 | 10.5 s              |
| 37:18.0   | Data point 36 | 1.50000 mL | 0.10212 mL | 0.09377 mL | 0.30000 mL | 3.350 | -0.00456 | 0.45623      | 0.00033 | 10.0 s              |
| 37:53.4   | Data point 37 | 1.50000 mL | 0.10212 mL | 0.09544 mL | 0.30000 mL | 3.512 | -0.00080 | 0.01535      | 0.00032 | 10.0 s              |
| 38:39.1   | Data point 38 | 1.50000 mL | 0.10212 mL | 0.09727 mL | 0.30000 mL | 3.706 | -0.00719 | 0.81084      | 0.00039 | 10.0 s              |
| 39:30.1   | Data point 39 | 1.50000 mL | 0.10212 mL | 0.09875 mL | 0.30000 mL | 3.908 | -0.01381 | 0.88552      | 0.00072 | 10.5 s              |
| 40:06.1   | Data point 40 | 1.50000 mL | 0.10212 mL | 0.09986 mL | 0.30000 mL | 4.220 | -0.00595 | 0.67659      | 0.00036 | 10.0 s              |
| 40:51.7   | Data point 41 | 1.50000 mL | 0.10212 mL | 0.10045 mL | 0.30000 mL | 4.415 | -0.00682 | 0.73657      | 0.00039 | 10.5 s              |
| 41:38.0   | Data point 42 | 1.50000 mL | 0.10212 mL | 0.10087 mL | 0.30000 mL | 4.612 | -0.01104 | 0.72091      | 0.00064 | 10.5 s              |
| 42:29.5   | Data point 43 | 1.50000 mL | 0.10212 mL | 0.10118 mL | 0.30000 mL | 4.814 | -0.01440 | 0.75675      | 0.00082 | 10.5 s              |
| 43:05.4   | Data point 44 | 1.50000 mL | 0.10212 mL | 0.10141 mL | 0.30000 mL | 5.068 | -0.01600 | 0.81524      | 0.00088 | 11.5 s              |
| 43:47.3   | Data point 45 | 1.50000 mL | 0.10212 mL | 0.10158 mL | 0.30000 mL | 5.325 | -0.01213 | 0.64755      | 0.00074 | 12.0 s              |
| 44:30.0   | Data point 46 | 1.50000 mL | 0.10212 mL | 0.10174 mL | 0.30000 mL | 5.861 | -0.01983 | 0.98013      | 0.00099 | 35.5 s              |
| 45:36.0   | Data point 47 | 1.50000 mL | 0.10212 mL | 0.10181 mL | 0.30000 mL | 6.309 | -0.01961 | 0.97472      | 0.00098 | 56.0 s              |
| 47:02.6   | Data point 48 | 1.50000 mL | 0.10212 mL | 0.10186 mL | 0.30000 mL | 6.639 | -0.03066 | 0.99363      | 0.00152 | Timed out at 59.5 s |
| 48:28.0   | Data point 49 | 1.50000 mL | 0.10212 mL | 0.10191 mL | 0.30000 mL | 7.034 | -0.05072 | 0.99593      | 0.00251 | Timed out at 59.5 s |
| 49:58.5   | Data point 50 | 1.50000 mL | 0.10212 mL | 0.10195 mL | 0.30000 mL | 7.398 | -0.06220 | 0.99680      | 0.00308 | Timed out at 59.5 s |
| 51:29.0   | Data point 51 | 1.50000 mL | 0.10212 mL | 0.10200 mL | 0.30000 mL | 7.885 | -0.06202 | 0.99692      | 0.00307 | Timed out at 59.5 s |
| 52:59.4   | Data point 52 | 1.50000 mL | 0.10212 mL | 0.10205 mL | 0.30000 mL | 8.135 | -0.04192 | 0.98906      | 0.00208 | Timed out at 59.5 s |
| 54:30.0   | Data point 53 | 1.50000 mL | 0.10212 mL | 0.10209 mL | 0.30000 mL | 8.402 | -0.02237 | 0.99033      | 0.00111 | Timed out at 59.5 s |
| 56:00.4   | Data point 54 | 1.50000 mL | 0.10212 mL | 0.10214 mL | 0.30000 mL | 8.573 | -0.01945 | 0.95229      | 0.00098 | 53.5 s              |
| 57:24.5   | Data point 55 | 1.50000 mL | 0.10212 mL | 0.10221 mL | 0.30000 mL | 8.793 | -0.01809 | 0.98417      | 0.00090 | 34.5 s              |
| 58:39.9   | Data point 56 | 1.50000 mL | 0.10212 mL | 0.10230 mL | 0.30000 mL | 9.005 | -0.01939 | 0.93292      | 0.00099 | 19.5 s              |
| 1:00:24.9 | Data point 57 | 1.50000 mL | 0.16011 mL | 0.10230 mL | 0.80000 mL | 1.959 | -0.01114 | 0.87304      | 0.00059 | 10.0 s              |
| 1:01:11.2 | Data point 58 | 1.50000 mL | 0.16011 mL | 0.12105 mL | 0.80000 mL | 2.170 | 0.00081  | 0.04813      | 0.00018 | 10.0 s              |
| 1:01:46.9 | Data point 59 | 1.50000 mL | 0.16011 mL | 0.13271 mL | 0.80000 mL | 2.378 | 0.00136  | 0.09971      | 0.00021 | 10.0 s              |
| 1:02:22.5 | Data point 60 | 1.50000 mL | 0.16011 mL | 0.14017 mL | 0.80000 mL | 2.585 | 0.01209  | 0.68746      | 0.00072 | 10.0 s              |
| 1:02:58.1 | Data point 61 | 1.50000 mL | 0.16011 mL | 0.14513 mL | 0.80000 mL | 2.787 | 0.00716  | 0.56892      | 0.00047 | 10.0 s              |
| 1:03:33.6 | Data point 62 | 1.50000 mL | 0.16011 mL | 0.14866 mL | 0.80000 mL | 2.998 | -0.00487 | 0.59781      | 0.00031 | 10.0 s              |
| 1:04:09.0 | Data point 63 | 1.50000 mL | 0.16011 mL | 0.15129 mL | 0.80000 mL | 3.171 | 0.00223  | 0.08135      | 0.00039 | 10.0 s              |
| 1:04:54.7 | Data point 64 | 1.50000 mL | 0.16011 mL | 0.15376 mL | 0.80000 mL | 3.364 | -0.00945 | 0.67088      | 0.00057 | 10.0 s              |
| 1:05:40.5 | Data point 65 | 1.50000 mL | 0.16011 mL | 0.15555 mL | 0.80000 mL | 3.553 | -0.00773 | 0.66839      | 0.00047 | 10.0 s              |



## Assay Events

Sample name: **M18\_octanol**  
Assay name: **pH-metric high logP**  
Assay ID: **18C-09016**  
Filename: **C:\Sirius\_T3\Mehtap\20180309\_exp31\_logP\_T3-2\18C-09016\_M18\_octanol\_pH-metric high logP.t3r**

Experiment start time: **3/9/2018 11:02:44 PM**  
Analyst: **Pion**  
Instrument ID: **T312060**

## Events (continued)

| Time      | Event         | Water      | Acid       | Base       | Octanol    | pH    | dpH/dt   | pH R-squared | pH SD   | dpH/dt time         |
|-----------|---------------|------------|------------|------------|------------|-------|----------|--------------|---------|---------------------|
| 1:06:16.0 | Data point 66 | 1.50000 mL | 0.16011 mL | 0.15691 mL | 0.80000 mL | 3.758 | -0.00478 | 0.09544      | 0.00076 | 10.0 s              |
| 1:06:51.4 | Data point 67 | 1.50000 mL | 0.16011 mL | 0.15793 mL | 0.80000 mL | 3.973 | 0.00088  | 0.00414      | 0.00068 | 10.0 s              |
| 1:07:26.8 | Data point 68 | 1.50000 mL | 0.16011 mL | 0.15863 mL | 0.80000 mL | 4.186 | -0.01639 | 0.67438      | 0.00099 | 10.0 s              |
| 1:08:02.3 | Data point 69 | 1.50000 mL | 0.16011 mL | 0.15912 mL | 0.80000 mL | 4.378 | -0.01336 | 0.45806      | 0.00098 | 10.0 s              |
| 1:08:37.7 | Data point 70 | 1.50000 mL | 0.16011 mL | 0.15945 mL | 0.80000 mL | 4.589 | -0.00985 | 0.60220      | 0.00063 | 11.0 s              |
| 1:09:14.1 | Data point 71 | 1.50000 mL | 0.16011 mL | 0.15967 mL | 0.80000 mL | 4.736 | -0.00475 | 0.10626      | 0.00072 | 11.5 s              |
| 1:09:56.1 | Data point 72 | 1.50000 mL | 0.16011 mL | 0.15995 mL | 0.80000 mL | 5.134 | -0.01189 | 0.37022      | 0.00096 | 12.0 s              |
| 1:10:43.8 | Data point 73 | 1.50000 mL | 0.16011 mL | 0.16009 mL | 0.80000 mL | 5.393 | -0.01905 | 0.93142      | 0.00098 | 34.5 s              |
| 1:11:48.9 | Data point 74 | 1.50000 mL | 0.16011 mL | 0.16018 mL | 0.80000 mL | 5.755 | -0.01516 | 0.77806      | 0.00085 | 45.5 s              |
| 1:13:05.0 | Data point 75 | 1.50000 mL | 0.16011 mL | 0.16025 mL | 0.80000 mL | 6.047 | -0.01855 | 0.94284      | 0.00094 | 50.5 s              |
| 1:14:26.2 | Data point 76 | 1.50000 mL | 0.16011 mL | 0.16030 mL | 0.80000 mL | 6.272 | -0.01969 | 0.96730      | 0.00099 | 58.0 s              |
| 1:15:49.6 | Data point 77 | 1.50000 mL | 0.16011 mL | 0.16035 mL | 0.80000 mL | 6.474 | -0.02760 | 0.99228      | 0.00137 | Timed out at 59.5 s |
| 1:17:20.1 | Data point 78 | 1.50000 mL | 0.16011 mL | 0.16040 mL | 0.80000 mL | 6.897 | -0.06395 | 0.99250      | 0.00317 | Timed out at 59.5 s |
| 1:18:45.5 | Data point 79 | 1.50000 mL | 0.16011 mL | 0.16044 mL | 0.80000 mL | 7.185 | -0.06453 | 0.99687      | 0.00319 | Timed out at 59.5 s |
| 1:20:16.1 | Data point 80 | 1.50000 mL | 0.16011 mL | 0.16049 mL | 0.80000 mL | 7.570 | -0.08020 | 0.98798      | 0.00398 | Timed out at 59.5 s |
| 1:21:46.6 | Data point 81 | 1.50000 mL | 0.16011 mL | 0.16054 mL | 0.80000 mL | 7.910 | -0.05115 | 0.99413      | 0.00253 | Timed out at 59.5 s |
| 1:23:17.1 | Data point 82 | 1.50000 mL | 0.16011 mL | 0.16058 mL | 0.80000 mL | 8.105 | -0.04177 | 0.93249      | 0.00214 | Timed out at 59.5 s |
| 1:24:52.7 | Data point 83 | 1.50000 mL | 0.16011 mL | 0.16065 mL | 0.80000 mL | 8.398 | -0.02637 | 0.89962      | 0.00137 | Timed out at 59.5 s |
| 1:26:33.5 | Data point 84 | 1.50000 mL | 0.16011 mL | 0.16075 mL | 0.80000 mL | 8.655 | -0.01834 | 0.88375      | 0.00096 | 28.0 s              |
| 1:27:37.2 | Data point 85 | 1.50000 mL | 0.16011 mL | 0.16084 mL | 0.80000 mL | 8.817 | -0.01433 | 0.54002      | 0.00096 | 16.5 s              |
| 1:28:29.4 | Data point 86 | 1.50000 mL | 0.16011 mL | 0.16096 mL | 0.80000 mL | 9.030 | -0.01224 | 0.37247      | 0.00099 | 14.0 s              |
| 1:28:52.4 | Assay volumes | 1.50000 mL | 0.16011 mL | 0.16096 mL | 0.80000 mL |       |          |              |         |                     |



Sample name: **M18\_octanol**  
 Assay name: **pH-metric high logP**  
 Assay ID: **18C-09016**  
 Filename: **C:\Sirius\_T3\Mehtap\20180309\_exp31\_logP\_T3-2\18C-09016\_M18\_octanol\_pH-metric high logP.t3r**

Experiment start time: **3/9/2018 11:02:44 PM**  
 Analyst: **Pion**  
 Instrument ID: **T312060**

## Assay Settings

| Setting                             | Value              | Original Value | Date/Time changed | Imported from |
|-------------------------------------|--------------------|----------------|-------------------|---------------|
| <b>General Settings</b>             |                    |                |                   |               |
| Analyst name                        | Pion               |                |                   |               |
| <b>Standard Experiment Settings</b> |                    |                |                   |               |
| Number of titrations                | 3                  |                |                   |               |
| Minimum pH                          | 2.000              |                |                   |               |
| Maximum pH                          | 9.000              |                |                   |               |
| pH step between points of           | 0.200              |                |                   |               |
| Minimum titrant addition            | 0.00002 mL         |                |                   |               |
| Maximum titrant addition            | 0.10000 mL         |                |                   |               |
| Argon flow rate                     | 100%               |                |                   |               |
| Start titration using               | Cautious pH adjust |                |                   |               |
| <b>Advanced General Settings</b>    |                    |                |                   |               |
| Detect turbidity using              | None               |                |                   |               |
| Collect turbidity sensor data       | No                 |                |                   |               |
| Collect UV spectra                  | No                 |                |                   |               |
| Stir after titrant addition for     | 5 seconds          |                |                   |               |
| For titrant addition, stir at       | 10%                |                |                   |               |
| <b>Titration Pre-Dose</b>           |                    |                |                   |               |
| Titration pre-dose                  | None               |                |                   |               |
| <b>Assay Medium</b>                 |                    |                |                   |               |
| ISA water volume                    | 1.50 mL            |                |                   |               |
| Water added                         | Automatic          |                |                   |               |
| Partition solvent type              | Octanol            |                |                   |               |
| Partition volume                    | 0.100 mL           |                |                   |               |
| Partition solvent added             | Manual in advance  |                |                   |               |
| After partition addition, stir for  | 1 seconds          |                |                   |               |
| <b>Sample Sonication</b>            |                    |                |                   |               |
| Sonicate                            | Yes                |                |                   |               |
| Adjust pH for sonication            | No                 |                |                   |               |
| Sonicate for                        | 60 seconds         |                |                   |               |
| After sonication stir for           | 5 seconds          |                |                   |               |
| <b>Sample Dissolution</b>           |                    |                |                   |               |
| Perform a dissolution stage         | Yes                |                |                   |               |
| Adjust and hold pH for dissolution  | To start pH        |                |                   |               |
| Stir to dissolve for                | 120 seconds        |                |                   |               |
| For dissolution, stir at            | 10%                |                |                   |               |
| <b>Carbonate purge</b>              |                    |                |                   |               |
| Perform a carbonate purge           | No                 |                |                   |               |
| <b>Temperature Control</b>          |                    |                |                   |               |
| Wait for temperature                | Yes                |                |                   |               |
| Required start temperature          | 25.0°C             |                |                   |               |
| Acceptable deviation                | 0.5°C              |                |                   |               |
| Time to wait                        | 60 seconds         |                |                   |               |
| Stir speed of                       | 50%                |                |                   |               |
| <b>Titration 1</b>                  |                    |                |                   |               |
| Titrate from                        | Low to high pH     |                |                   |               |
| Adjust to start pH                  | Yes                |                |                   |               |
| After pH adjust stir for            | 30 seconds         |                |                   |               |
| Stir to allow partitioning for      | 15 seconds         |                |                   |               |
| Stirrer speed for partitioning      | 50%                |                |                   |               |
| <b>Titration 2</b>                  |                    |                |                   |               |
| Titrate from                        | Low to high pH     |                |                   |               |
| Add additional water                | 0.00 mL            |                |                   |               |
| Additional partition solvent volume | 0.200 mL           |                |                   |               |
| Additional partition solvent added  | Automatic          |                |                   |               |
| After pH adjust stir for            | 30 seconds         |                |                   |               |
| Stir to allow partitioning for      | 15 seconds         |                |                   |               |
| Stirrer speed for partitioning      | 55%                |                |                   |               |



Sample name: **M18\_octanol**  
 Assay name: **pH-metric high logP**  
 Assay ID: **18C-09016**  
 Filename: **C:\Sirius\_T3\Mehtap\20180309\_exp31\_logP\_T3-2\18C-09016\_M18\_octanol\_pH-metric high logP.t3r**

Experiment start time: **3/9/2018 11:02:44 PM**  
 Analyst: **Pion**  
 Instrument ID: **T312060**

## Assay Settings (continued)

| Setting                             | Value          | Original Value | Date/Time changed | Imported from |
|-------------------------------------|----------------|----------------|-------------------|---------------|
| <b>Titration 3</b>                  |                |                |                   |               |
| Titrate from                        | Low to high pH |                |                   |               |
| Add additional water                | 0.00 mL        |                |                   |               |
| Additional partition solvent volume | 0.500 mL       |                |                   |               |
| Additional partition solvent added  | Automatic      |                |                   |               |
| After pH adjust stir for            | 30 seconds     |                |                   |               |
| Stir to allow partitioning for      | 15 seconds     |                |                   |               |
| Stirrer speed for partitioning      | 60%            |                |                   |               |
| <b>Data Point Stability</b>         |                |                |                   |               |
| Stir during data point collection   | No             |                |                   |               |
| Delay before data point collection  | 0 seconds      |                |                   |               |
| Number of points to average         | 20 points      |                |                   |               |
| Time interval between points        | 0.50 seconds   |                |                   |               |
| Required maximum standard deviation | 0.00100 dpH/dt |                |                   |               |
| Stability timeout after             | 60 seconds     |                |                   |               |

## Calibration Settings

| Setting                   | Value  | Date/Time changed    | Imported from             |
|---------------------------|--------|----------------------|---------------------------|
| Four-Plus alpha           | 0.102  | 3/9/2018 11:02:43 PM | C:\Sirius_T3\HCl18C09.t3r |
| Four-Plus S               | 0.9967 | 3/9/2018 11:02:43 PM | C:\Sirius_T3\HCl18C09.t3r |
| Four-Plus jH              | 1.2    | 3/9/2018 11:02:43 PM | C:\Sirius_T3\HCl18C09.t3r |
| Four-Plus jOH             | 0.0    | 3/9/2018 11:02:43 PM | C:\Sirius_T3\HCl18C09.t3r |
| Base concentration factor | 1.000  | 3/9/2018 11:02:44 PM | C:\Sirius_T3\KOH18B27.t3r |
| Acid concentration factor | 1.000  | 3/9/2018 11:02:44 PM | C:\Sirius_T3\HCl18C09.t3r |

## Instrument Settings

| Setting              | Value                      | Batch Id    | Install date           |
|----------------------|----------------------------|-------------|------------------------|
| Instrument owner     | Merck                      |             |                        |
| Instrument ID        | T312060                    |             |                        |
| Instrument type      | T3 Simulator               |             |                        |
| Software version     | 1.1.3.0                    |             |                        |
| Dispenser module     |                            | T3DM1200361 | 3/31/2009 6:24:52 AM   |
| Dispenser 0          | Water                      |             | 3/31/2009 6:25:05 AM   |
| Syringe volume       | 2.5 mL                     |             |                        |
| Firmware version     | 1.2.1(r2)                  |             |                        |
| Titrant              | Water (0.15 M KCl)         | 02-06-2018  | 2/27/2018 11:05:59 AM  |
| Dispenser 2          | Acid                       |             | 3/31/2009 6:25:11 AM   |
| Syringe volume       | 0.5 mL                     |             |                        |
| Firmware version     | 1.2.1(r2)                  |             |                        |
| Titrant              | Acid (0.5 M HCl)           | 02-27-2018  | 2/27/2018 11:27:22 AM  |
| Dispenser 1          | Base                       |             | 3/31/2009 6:25:21 AM   |
| Syringe volume       | 0.5 mL                     |             |                        |
| Firmware version     | 1.2.1(r2)                  |             |                        |
| Titrant              | Base (0.5 M KOH)           | 9/22/2017   | 2/27/2018 11:21:22 AM  |
| Dispenser 5          | Cosolvent                  |             | 3/31/2009 6:26:24 AM   |
| Syringe volume       | 2.5 mL                     |             |                        |
| Firmware version     | 1.2.1(r2)                  |             |                        |
| Distribution valve 5 | Distribution Valve         |             | 3/31/2009 6:28:19 AM   |
| Firmware version     | 1.1.3                      |             |                        |
| Port A               | Methanol (80%, 0.15 M KCl) | 02-08-2018  | 3/6/2018 10:28:59 AM   |
| Port B               | Cyclohexane                | 11-01-17    | 2/27/2018 11:37:57 AM  |
| Dispenser 3          | Buffer                     |             | 8/3/2010 6:05:16 AM    |
| Syringe volume       | 0.5 mL                     |             |                        |
| Firmware version     | 1.2.1(r2)                  |             |                        |
| Titrant              | Dodecane                   | 2018/01/31  | 2/28/2018 11:18:04 AM  |
| Dispenser 6          | Octanol                    |             | 10/22/2010 11:52:43 AM |

Sample name: **M18\_octanol**  
 Assay name: **pH-metric high logP**  
 Assay ID: **18C-09016**  
 Filename: **C:\Sirius\_T3\Mehtap\20180309\_exp31\_logP\_T3-2\18C-09016\_M18\_octanol\_pH-metric high logP.t3r**

Experiment start time: **3/9/2018 11:02:44 PM**  
 Analyst: **Pion**  
 Instrument ID: **T312060**

## Instrument Settings (continued)

| Setting                                   | Value                      | Batch Id    | Install date           |
|-------------------------------------------|----------------------------|-------------|------------------------|
| Syringe volume                            | 0.5 mL                     |             |                        |
| Firmware version                          | 1.2.1(r2)                  |             |                        |
| Titrant                                   | Octanol                    | 01-31-2018  | 2/27/2018 10:59:35 AM  |
| Titration                                 |                            | T3TM1200161 | 3/31/2009 6:24:17 AM   |
| Horizontal axis firmware version          | 1.17 AI1DI2DO2 Stepper 2   |             |                        |
| Vertical axis firmware version            | 1.17 AI1DI2DO2 Stepper 2   |             |                        |
| Chassis I/O firmware version              | 1.11 AI1DI0DO4 Norgren I/O |             |                        |
| Probe I/O firmware version                | 1.1.1                      |             |                        |
| Electrode                                 | T3 Electrode               | T3E0923     | 1/23/2018 3:01:00 PM   |
| E0 calibration                            | +4.01 mV                   |             | 3/9/2018 11:03:12 PM   |
| Filling solution                          | 3M KCl                     | KCL097      | 3/9/2018 11:05:42 AM   |
| Liquids                                   |                            |             |                        |
| Wash 1                                    | 50% IPA:50% Water          |             | 3/9/2018 11:04:22 AM   |
| Wash 2                                    | 0.5% Triton X-100 in H2O   |             | 3/9/2018 11:04:25 AM   |
| Buffer position 1                         | pH7 Wash                   |             | 3/9/2018 11:04:27 AM   |
| Buffer position 2                         | pH 7                       |             | 3/9/2018 11:04:30 AM   |
| Storage position                          |                            |             | 3/9/2018 11:05:04 AM   |
| Wash water                                | 5e+003 mL                  | 02-27-2018  | 2/27/2018 10:54:39 AM  |
| Waste                                     | 1.1e+004 mL                |             | 11/28/2017 11:36:29 AM |
| Temperature controller                    |                            |             | 8/5/2010 7:35:13 AM    |
| Turbidity detector                        |                            |             | 3/31/2009 6:24:45 AM   |
| Spectrometer                              |                            | 074811      | 11/23/2010 12:22:28 PM |
| Dip probe                                 |                            | 10196       |                        |
| Wavelength coefficient A0                 | 183.333                    |             |                        |
| Wavelength coefficient A1                 | 2.21568                    |             |                        |
| Wavelength coefficient A2                 | -0.000289308               |             |                        |
| Total lamp lit time                       | 123:16:41                  |             | 11/23/2010 12:22:28 PM |
| Calibrated on                             | 2/27/2018 11:40:38 AM      |             |                        |
| Integration time                          | 40                         |             |                        |
| Scans averaged                            | 10                         |             |                        |
| Autoloader                                |                            | T3AL1200345 | 11/10/2015 10:34:13 AM |
| Left-right axis firmware version          | 1.17 AI1DI2DO2 Stepper 2   |             |                        |
| Front-back axis firmware version          | 1.17 AI1DI2DO2 Stepper 2   |             |                        |
| Vertical axis firmware version            | 1.17 AI1DI2DO2 Stepper 2   |             |                        |
| Chassis I/O firmware version              | 1.11 AI1DI0DO4 Norgren I/O |             |                        |
| Configuration                             |                            |             |                        |
| Alternate titration position              | Titration position         |             |                        |
| Alternate reference position              | Reference position         |             |                        |
| Maximum standard vial volume              | 3.50 mL                    |             |                        |
| Maximum alternate vial volume             | 25.00 mL                   |             |                        |
| Automatic action idle period              | 5 minute(s)                |             |                        |
| Titration tube volume                     | 1.3 mL                     |             |                        |
| Syringe flush count                       | 3.50                       |             |                        |
| Flowing wash pump volume                  | 20.0 mL                    |             |                        |
| Flowing wash stir duration                | 5 s                        |             |                        |
| Flowing wash stir speed                   | 30%                        |             |                        |
| Solvent wash stir duration                | 5 s                        |             |                        |
| Solvent wash stir speed                   | 30%                        |             |                        |
| Surfactant wash stir duration             | 5 s                        |             |                        |
| Surfactant wash stir speed                | 30%                        |             |                        |
| E0 calibration minimum number of points   | 10                         |             |                        |
| E0 calibration maximum standard deviation | 0.01500                    |             |                        |
| E0 calibration timeout period             | 60 s                       |             |                        |
| E0 calibration stir duration              | 5 s                        |             |                        |
| E0 calibration preparation stir speed     | 30%                        |             |                        |
| E0 calibration buffer wash stir duration  | 5 s                        |             |                        |
| E0 calibration buffer wash stir speed     | 30%                        |             |                        |
| E0 calibration reading stir speed         | 0%                         |             |                        |

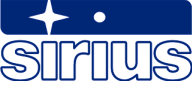

## Assay Settings

Sample name: **M18\_octanol**  
Assay name: **pH-metric high logP**  
Assay ID: **18C-09016**  
Filename: **C:\Sirius\_T3\Mehtap\20180309\_exp31\_logP\_T3-2\18C-09016\_M18\_octanol\_pH-metric high logP.t3r**

Experiment start time: **3/9/2018 11:02:44 PM**  
Analyst: **Pion**  
Instrument ID: **T312060**

### Instrument Settings (continued)

| Setting                                     | Value   | Batch Id | Install date |
|---------------------------------------------|---------|----------|--------------|
| Spectrometer calibration stir duration      | 5 s     |          |              |
| Spectrometer calibration stir speed         | 30%     |          |              |
| Spectrometer calibration wash pump volume   | 20.0 mL |          |              |
| Spectrometer calibration wash stir duration | 5 s     |          |              |
| Spectrometer calibration wash stir speed    | 30%     |          |              |
| Overhead dispense height                    | 10000   |          |              |

### Refinement Settings

| Setting                        | Value    | Default value |
|--------------------------------|----------|---------------|
| Turbidity detection method     | None     | None          |
| Turbidity wavelength to assess | 500.0 nm | 500.0 nm      |
| Turbidity maximum absorbance   | 0.100    | 0.100         |
| Turbidity probe threshold      | 50.00    | 50.00         |
