# Supplementary material for: Octanol-water partition coefficient measurements for the SAMPL6 Blind Prediction Challenge
Source: bioRxiv or medRxiv preprint supplement (doi:10.1101/757393), 2019-12-02
Supplement: Supplementary file [file media-2.zip]

Sample name: **M12\_octanol**  
 Assay name: **pH-metric high logP**  
 Assay ID: **18C-03013**  
 Filename: **C:\Sirius\_T3\Mehtap\20180302\_exp29\_logP\_T3-2\18C-03013\_M12\_octanol\_pH-metric high logP.t3r**

Experiment start time: **3/3/2018 4:33:34 PM**  
 Analyst: **Pion**  
 Instrument ID: **T312060**

## pH-metric Result

logP (XH +) -4.20 ±1.91 (n=49)  
 logP (neutral X) 3.81 ±0.01 (n=49)

### 18C-03013 Points 1 to 30

M12\_octanol concentration factor 0.900  
 Carbonate 0.0742 mM  
 Acidity error -0.41736 mM

### 18C-03013 Points 31 to 56

M12\_octanol concentration factor 0.766  
 Carbonate 0.1690 mM  
 Acidity error 0.13861 mM

### 18C-03013 Points 57 to 80

M12\_octanol concentration factor 1.090  
 Carbonate 0.1802 mM  
 Acidity error -0.94352 mM

## Warnings and errors

Errors None  
 Warnings One or more logP values out of range

## Sample logD and percent species

| pH     | M12_octanol<br>logD | M12_octanol<br>M12_octanolH | M12_octanol<br>M12_octanol | M12_octanol<br>M12_octanolH* | M12_octanol<br>M12_octanol* | Comment    |
|--------|---------------------|-----------------------------|----------------------------|------------------------------|-----------------------------|------------|
| 1.000  | -0.47               | 74.87 %                     | 0.00 %                     | 0.00 %                       | 25.12 %                     | Stomach pH |
| 1.200  | -0.27               | 65.28 %                     | 0.01 %                     | 0.00 %                       | 34.71 %                     |            |
| 2.000  | 0.53                | 22.96 %                     | 0.01 %                     | 0.00 %                       | 77.03 %                     |            |
| 3.000  | 1.52                | 2.89 %                      | 0.02 %                     | 0.00 %                       | 97.09 %                     |            |
| 4.000  | 2.50                | 0.30 %                      | 0.02 %                     | 0.00 %                       | 99.69 %                     |            |
| 5.000  | 3.34                | 0.03 %                      | 0.02 %                     | 0.00 %                       | 99.95 %                     | Blood pH   |
| 6.000  | 3.73                | 0.00 %                      | 0.02 %                     | 0.00 %                       | 99.98 %                     |            |
| 6.500  | 3.78                | 0.00 %                      | 0.02 %                     | 0.00 %                       | 99.98 %                     |            |
| 7.000  | 3.80                | 0.00 %                      | 0.02 %                     | 0.00 %                       | 99.98 %                     |            |
| 7.400  | 3.80                | 0.00 %                      | 0.02 %                     | 0.00 %                       | 99.98 %                     |            |
| 8.000  | 3.80                | 0.00 %                      | 0.02 %                     | 0.00 %                       | 99.98 %                     |            |
| 9.000  | 3.81                | 0.00 %                      | 0.02 %                     | 0.00 %                       | 99.98 %                     |            |
| 10.000 | 3.81                | 0.00 %                      | 0.02 %                     | 0.00 %                       | 99.98 %                     |            |
| 11.000 | 3.81                | 0.00 %                      | 0.02 %                     | 0.00 %                       | 99.98 %                     |            |
| 12.000 | 3.81                | 0.00 %                      | 0.02 %                     | 0.00 %                       | 99.98 %                     |            |

Sample name: **M12\_octanol**  
 Assay name: **pH-metric high logP**  
 Assay ID: **18C-03013**  
 Filename: **C:\Sirius\_T3\Mehtap\20180302\_exp29\_logP\_T3-2\18C-03013\_M12\_octanol\_pH-metric high logP.t3r**

Experiment start time: **3/3/2018 4:33:34 PM**  
 Analyst: **Pion**  
 Instrument ID: **T312060**

## Graphs

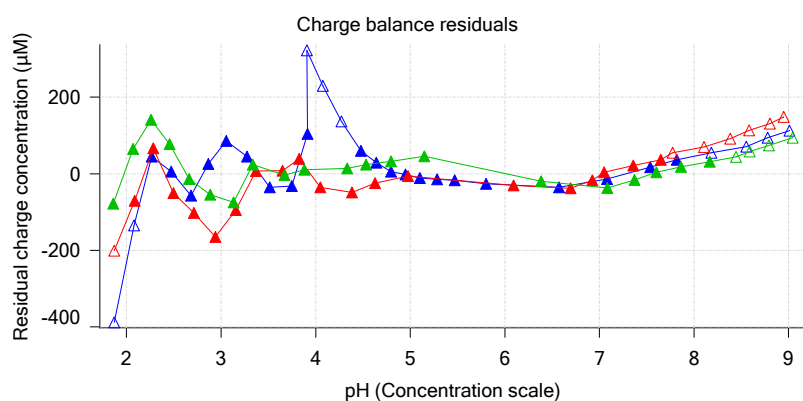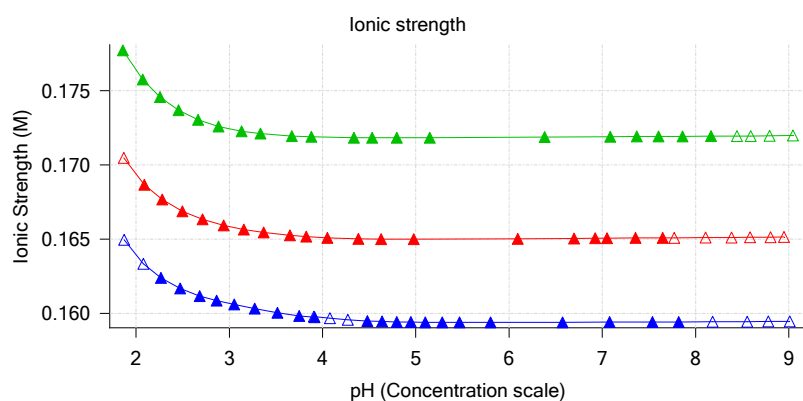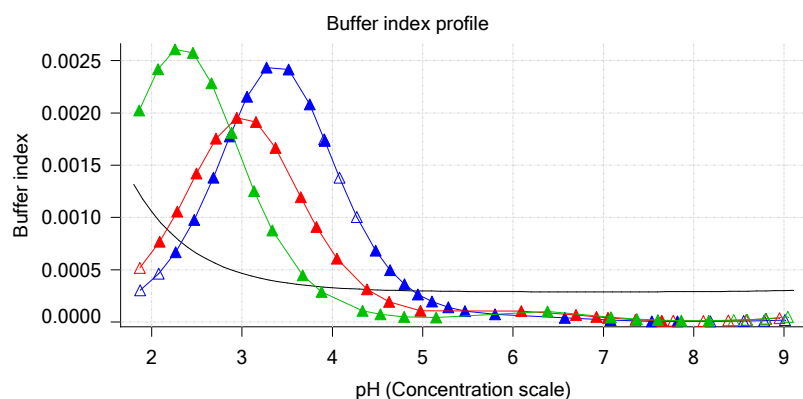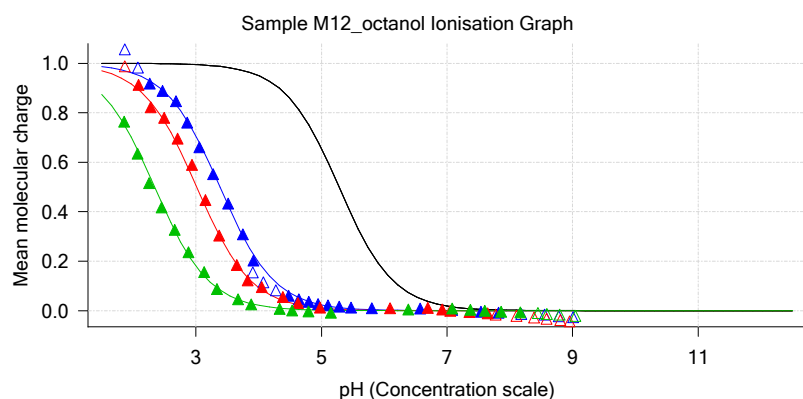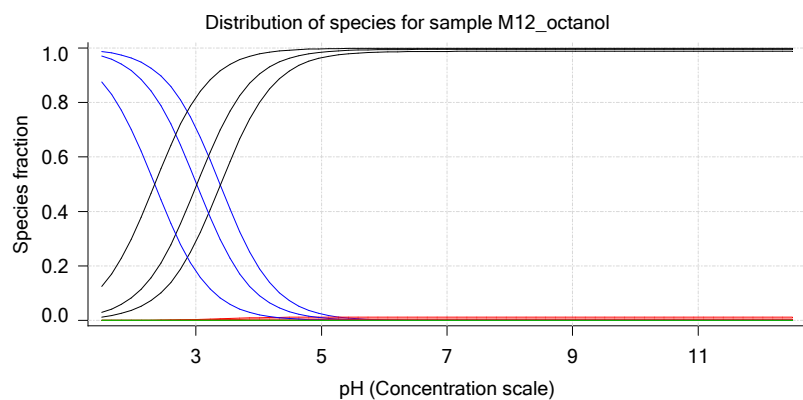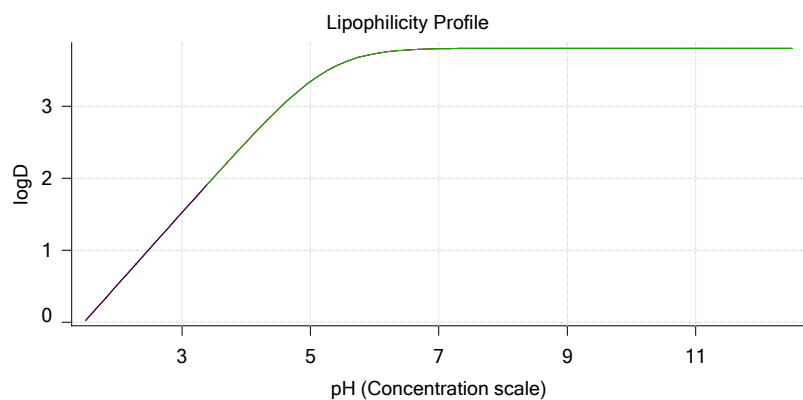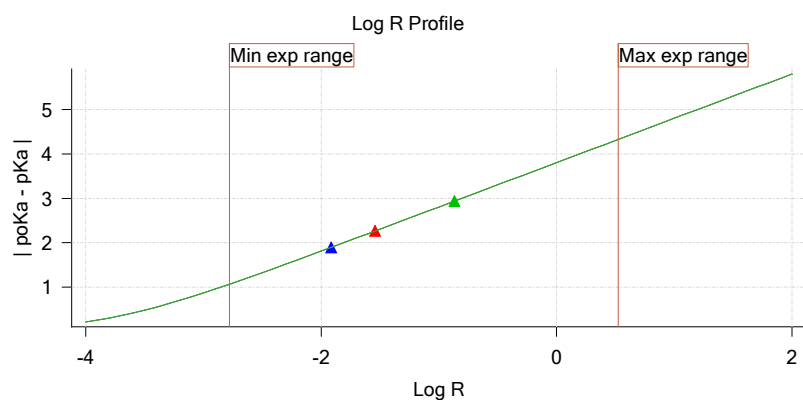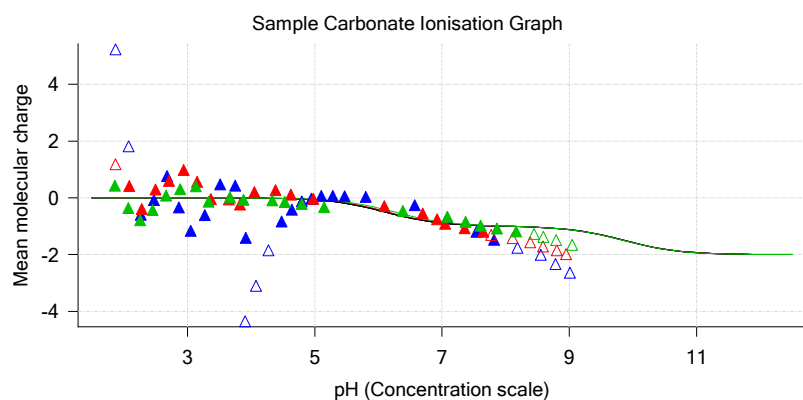

|              |                                                                                                   |                        |                            |
|--------------|---------------------------------------------------------------------------------------------------|------------------------|----------------------------|
| Sample name: | <b>M12_octanol</b>                                                                                | Experiment start time: | <b>3/3/2018 4:33:34 PM</b> |
| Assay name:  | <b>pH-metric high logP</b>                                                                        | Analyst:               | <b>Pion</b>                |
| Assay ID:    | <b>18C-03013</b>                                                                                  | Instrument ID:         | <b>T312060</b>             |
| Filename:    | <b>C:\Sirius_T3\Mehtap\20180302_exp29_logP_T3-2\18C-03013_M12_octanol_pH-metric high logP.t3r</b> |                        |                            |

## Graphs (continued)

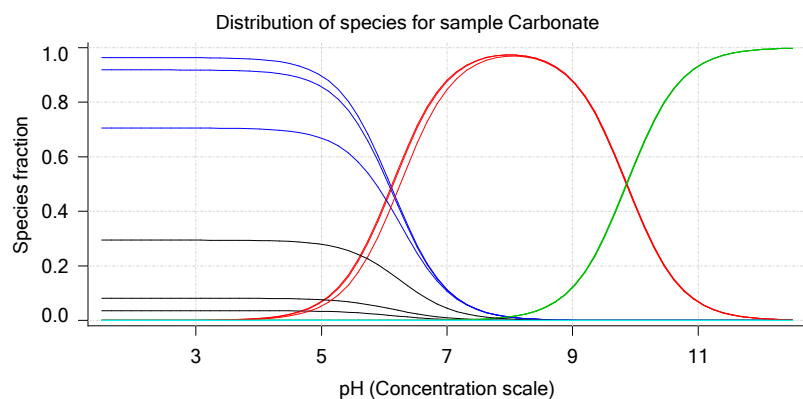

Sample name: **M12\_octanol**  
 Assay name: **pH-metric high logP**  
 Assay ID: **18C-03013**  
 Filename: **C:\Sirius\_T3\Mehtap\20180302\_exp29\_logP\_T3-2\18C-03013\_M12\_octanol\_pH-metric high logP.t3r**

Experiment start time: **3/3/2018 4:33:34 PM**  
 Analyst: **Pion**  
 Instrument ID: **T312060**

## pH-metric high logP Titration 1 of 3 18C-03013 Points 1 to 30

### Overall results

RMSD 1.132  
 Average ionic strength 0.160 M  
 Average temperature 24.9°C  
 Partition ratio 0.0122 : 1  
 Analyte concentration range 4689.3 µM to 4859.4 µM  
 Total points considered 21 of 30

### Warnings and errors

Errors None  
 Warnings None

### Four-Plus parameters

Alpha 0.111 3/3/2018 4:33:34 PM C:\Sirius\_T3\HCl18C02.t3r  
 S 0.9988 3/3/2018 4:33:34 PM C:\Sirius\_T3\HCl18C02.t3r  
 jH 1.0 3/3/2018 4:33:34 PM C:\Sirius\_T3\HCl18C02.t3r  
 jOH -0.8 3/3/2018 4:33:34 PM C:\Sirius\_T3\HCl18C02.t3r

### Titrants

0.50 M HCl 0.999058 3/3/2018 4:33:34 PM C:\Sirius\_T3\HCl18C02.t3r  
 0.50 M KOH 0.999845 3/3/2018 4:33:34 PM C:\Sirius\_T3\KOH18B27.t3r

### Sample

M12\_octanol concentration factor 0.900  
 M12\_octanol stoichiometry 1.000  
 Chloride stoichiometry 1.000  
 Base pKa 1 5.28  
 logP (XH +) 1.02  
 logP (neutral X) 3.87

### Sample graphs

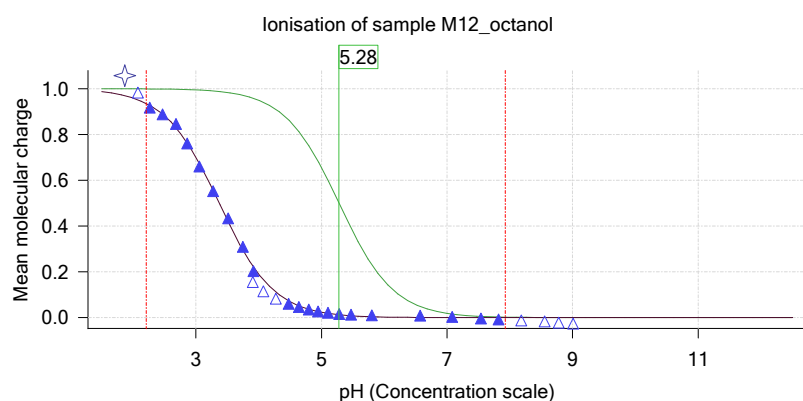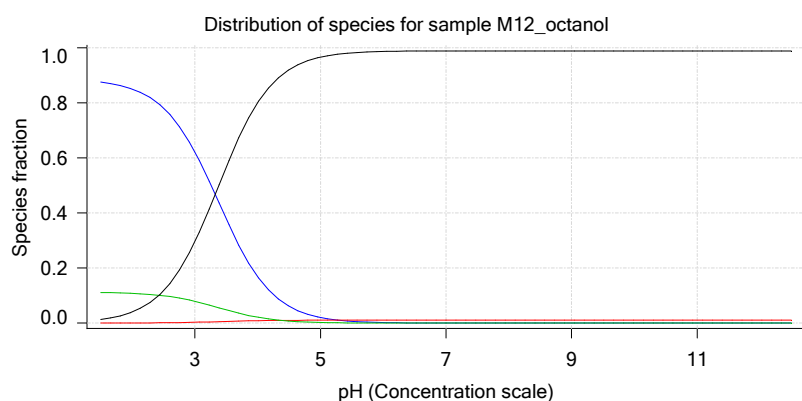

Sample name: **M12\_octanol**  
 Assay name: **pH-metric high logP**  
 Assay ID: **18C-03013**  
 Filename: **C:\Sirius\_T3\Mehtap\20180302\_exp29\_logP\_T3-2\18C-03013\_M12\_octanol\_pH-metric high logP.t3r**

Experiment start time: **3/3/2018 4:33:34 PM**  
 Analyst: **Pion**  
 Instrument ID: **T312060**

## Sample graphs (continued)

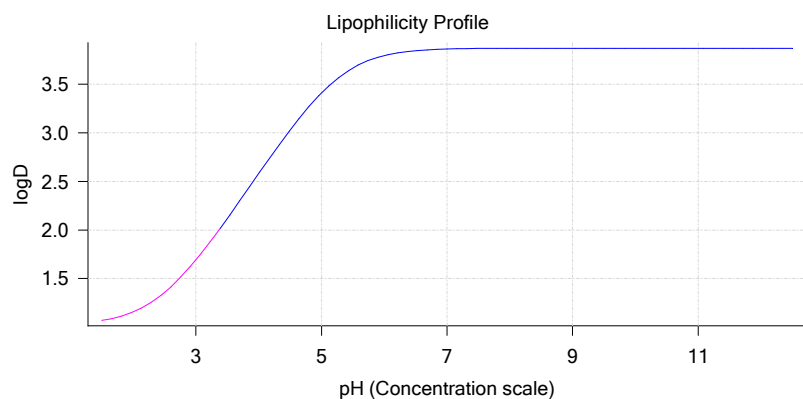

## Sample logD and percent species

| pH     | M12_octanol<br>logD | M12_octanol<br>M12_octanolH | M12_octanol<br>M12_octanolH | M12_octanol<br>M12_octanolH* | M12_octanol<br>M12_octanol* | Comment |
|--------|---------------------|-----------------------------|-----------------------------|------------------------------|-----------------------------|---------|
| 1.000  | 1.04                | 88.32 %                     | 0.00 %                      | 11.25 %                      | 0.42 %                      |         |
| 1.200  | 1.04                | 88.11 %                     | 0.01 %                      | 11.23 %                      | 0.66 %                      |         |
| 2.000  | 1.16                | 85.08 %                     | 0.04 %                      | 10.84 %                      | 4.03 %                      |         |
| 3.000  | 1.69                | 62.24 %                     | 0.33 %                      | 7.93 %                       | 29.50 %                     |         |
| 4.000  | 2.58                | 16.89 %                     | 0.89 %                      | 2.15 %                       | 80.07 %                     |         |
| 5.000  | 3.41                | 2.04 %                      | 1.07 %                      | 0.26 %                       | 96.63 %                     |         |
| 6.000  | 3.80                | 0.21 %                      | 1.09 %                      | 0.03 %                       | 98.67 %                     |         |
| 6.500  | 3.85                | 0.07 %                      | 1.09 %                      | 0.01 %                       | 98.83 %                     |         |
| 7.000  | 3.86                | 0.02 %                      | 1.09 %                      | 0.00 %                       | 98.88 %                     |         |
| 7.400  | 3.87                | 0.01 %                      | 1.09 %                      | 0.00 %                       | 98.90 %                     |         |
| 8.000  | 3.87                | 0.00 %                      | 1.09 %                      | 0.00 %                       | 98.90 %                     |         |
| 9.000  | 3.87                | 0.00 %                      | 1.09 %                      | 0.00 %                       | 98.90 %                     |         |
| 10.000 | 3.87                | 0.00 %                      | 1.09 %                      | 0.00 %                       | 98.91 %                     |         |
| 11.000 | 3.87                | 0.00 %                      | 1.09 %                      | 0.00 %                       | 98.91 %                     |         |
| 12.000 | 3.87                | 0.00 %                      | 1.09 %                      | 0.00 %                       | 98.91 %                     |         |

## Carbonate and acidity

Carbonate 0.074 mM  
 Acidity error -0.417 mM

## Other graphs

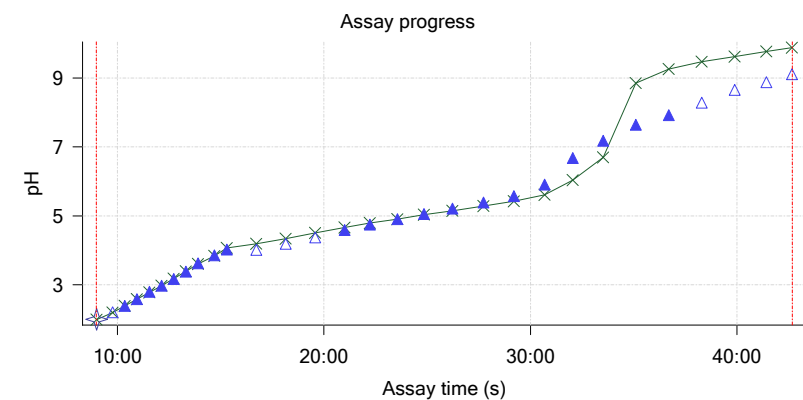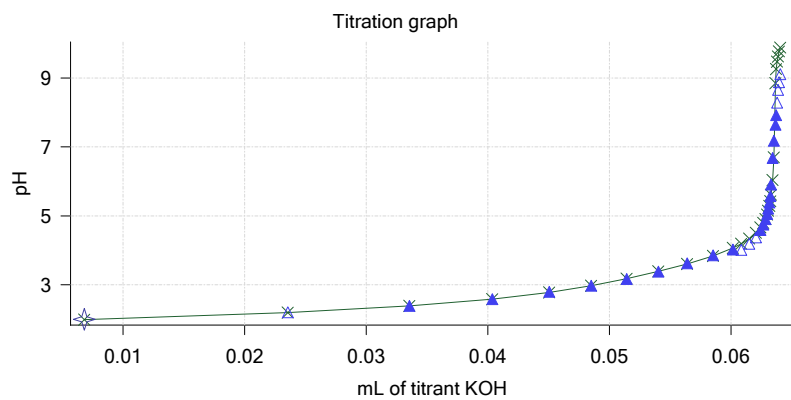

Sample name: **M12\_octanol**  
 Assay name: **pH-metric high logP**  
 Assay ID: **18C-03013**  
 Filename: **C:\Sirius\_T3\Mehtap\20180302\_exp29\_logP\_T3-2\18C-03013\_M12\_octanol\_pH-metric high logP.t3r**

Experiment start time: **3/3/2018 4:33:34 PM**  
 Analyst: **Pion**  
 Instrument ID: **T312060**

## Other graphs (continued)

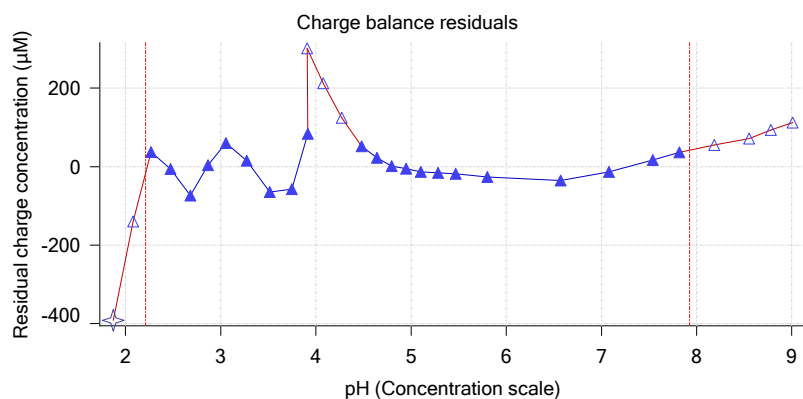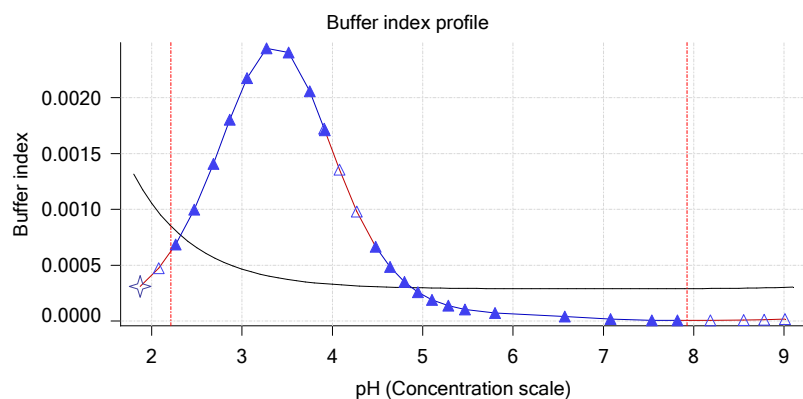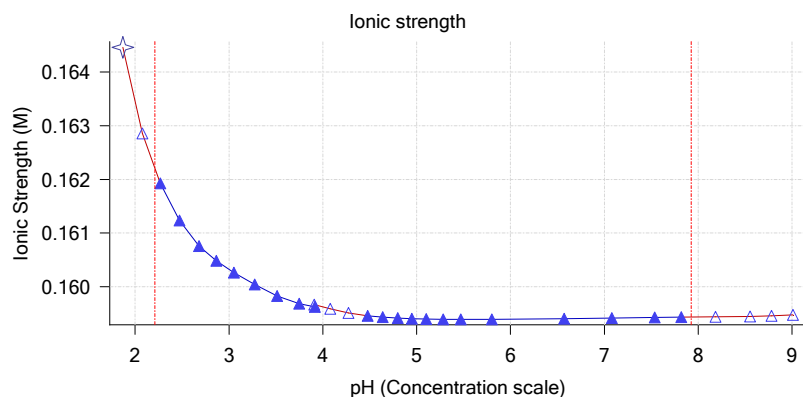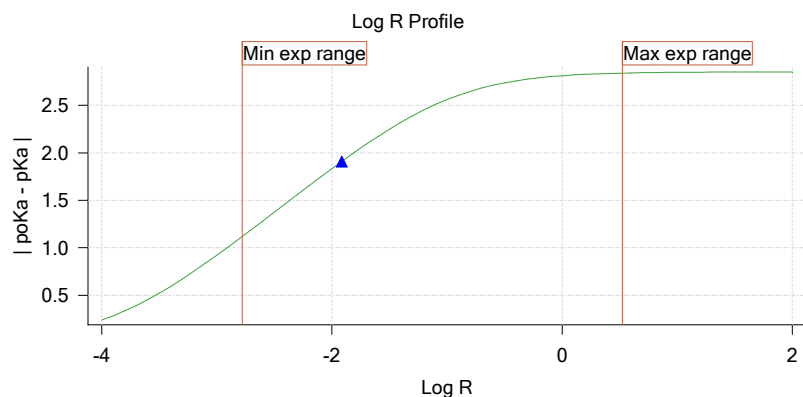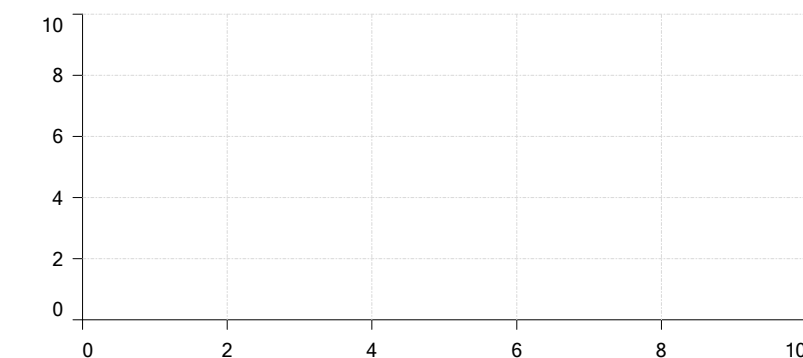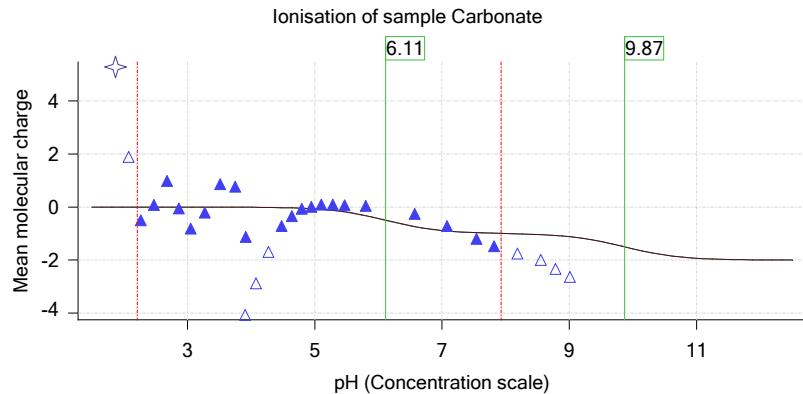

Sample name: **M12\_octanol**  
 Assay name: **pH-metric high logP**  
 Assay ID: **18C-03013**  
 Filename: **C:\Sirius\_T3\Mehtap\20180302\_exp29\_logP\_T3-2\18C-03013\_M12\_octanol\_pH-metric high logP.t3r**

Experiment start time: **3/3/2018 4:33:34 PM**  
 Analyst: **Pion**  
 Instrument ID: **T312060**

## pH-metric high logP Titration 2 of 3 18C-03013 Points 31 to 56

### Overall results

RMSD 0.588  
 Average ionic strength 0.165 M  
 Average temperature 25.0°C  
 Partition ratio 0.0288 : 1  
 Analyte concentration range 4305.5 µM to 4450.5 µM  
 Total points considered 19 of 26

### Warnings and errors

Errors None  
 Warnings None

### Four-Plus parameters

Alpha 0.111 3/3/2018 4:33:34 PM C:\Sirius\_T3\HCl18C02.t3r  
 S 0.9988 3/3/2018 4:33:34 PM C:\Sirius\_T3\HCl18C02.t3r  
 jH 1.0 3/3/2018 4:33:34 PM C:\Sirius\_T3\HCl18C02.t3r  
 jOH -0.8 3/3/2018 4:33:34 PM C:\Sirius\_T3\HCl18C02.t3r

### Titrants

0.50 M HCl 0.999058 3/3/2018 4:33:34 PM C:\Sirius\_T3\HCl18C02.t3r  
 0.50 M KOH 0.999845 3/3/2018 4:33:34 PM C:\Sirius\_T3\KOH18B27.t3r

### Sample

M12\_octanol concentration factor 0.766  
 M12\_octanol stoichiometry 1.000  
 Chloride stoichiometry 1.000  
 Base pKa 1 5.28  
 logP (XH +) 1.02  
 logP (neutral X) 3.88

### Sample graphs

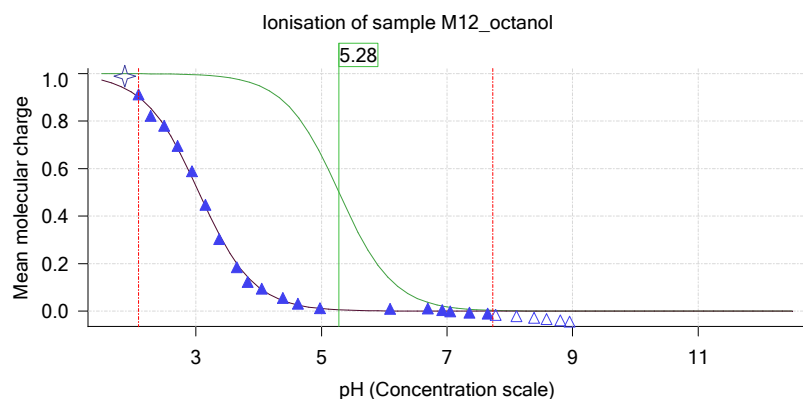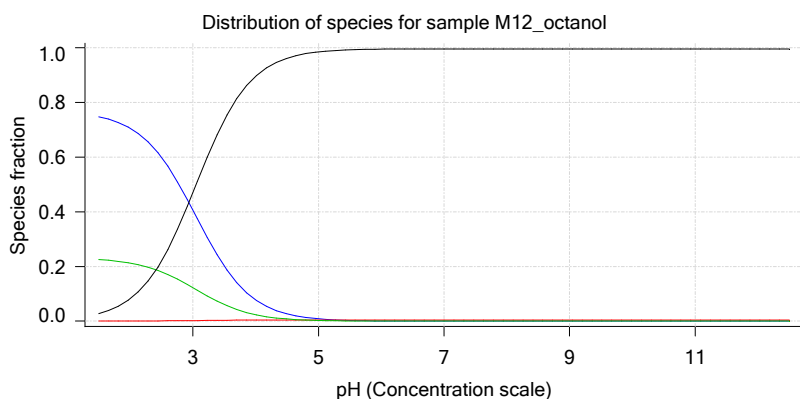

Sample name: **M12\_octanol**  
 Assay name: **pH-metric high logP**  
 Assay ID: **18C-03013**  
 Filename: **C:\Sirius\_T3\Mehtap\20180302\_exp29\_logP\_T3-2\18C-03013\_M12\_octanol\_pH-metric high logP.t3r**

Experiment start time: **3/3/2018 4:33:34 PM**  
 Analyst: **Pion**  
 Instrument ID: **T312060**

## Sample graphs (continued)

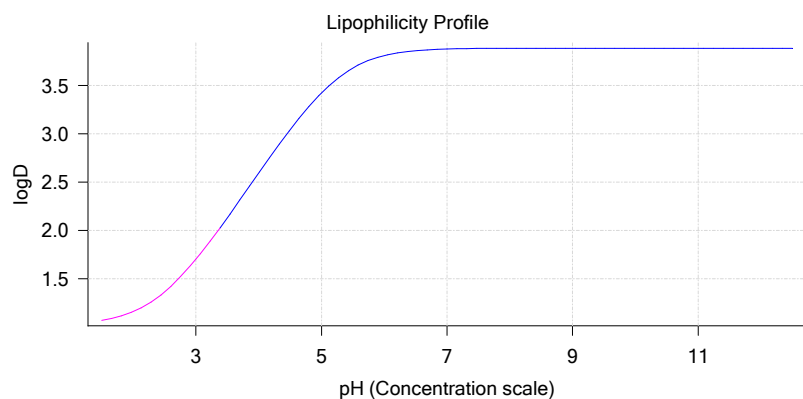

## Sample logD and percent species

| pH     | M12_octanol<br>logD | M12_octanol<br>M12_octanolH | M12_octanol<br>M12_octanolH | M12_octanol<br>M12_octanolH* | M12_octanol<br>M12_octanol* | Comment    |
|--------|---------------------|-----------------------------|-----------------------------|------------------------------|-----------------------------|------------|
| 1.000  | 1.04                | 76.18 %                     | 0.00 %                      | 22.94 %                      | 0.88 %                      | Stomach pH |
| 1.200  | 1.05                | 75.78 %                     | 0.01 %                      | 22.82 %                      | 1.39 %                      |            |
| 2.000  | 1.16                | 70.56 %                     | 0.04 %                      | 21.25 %                      | 8.16 %                      |            |
| 3.000  | 1.70                | 40.60 %                     | 0.21 %                      | 12.23 %                      | 46.96 %                     |            |
| 4.000  | 2.59                | 7.74 %                      | 0.41 %                      | 2.33 %                       | 89.52 %                     |            |
| 5.000  | 3.42                | 0.85 %                      | 0.45 %                      | 0.26 %                       | 98.45 %                     | Blood pH   |
| 6.000  | 3.81                | 0.09 %                      | 0.45 %                      | 0.03 %                       | 99.44 %                     |            |
| 6.500  | 3.86                | 0.03 %                      | 0.45 %                      | 0.01 %                       | 99.51 %                     |            |
| 7.000  | 3.88                | 0.01 %                      | 0.45 %                      | 0.00 %                       | 99.54 %                     |            |
| 7.400  | 3.88                | 0.00 %                      | 0.45 %                      | 0.00 %                       | 99.54 %                     |            |
| 8.000  | 3.88                | 0.00 %                      | 0.45 %                      | 0.00 %                       | 99.55 %                     |            |
| 9.000  | 3.88                | 0.00 %                      | 0.45 %                      | 0.00 %                       | 99.55 %                     |            |
| 10.000 | 3.88                | 0.00 %                      | 0.45 %                      | 0.00 %                       | 99.55 %                     |            |
| 11.000 | 3.88                | 0.00 %                      | 0.45 %                      | 0.00 %                       | 99.55 %                     |            |
| 12.000 | 3.88                | 0.00 %                      | 0.45 %                      | 0.00 %                       | 99.55 %                     |            |

## Carbonate and acidity

Carbonate 0.169 mM  
 Acidity error 0.139 mM

## Other graphs

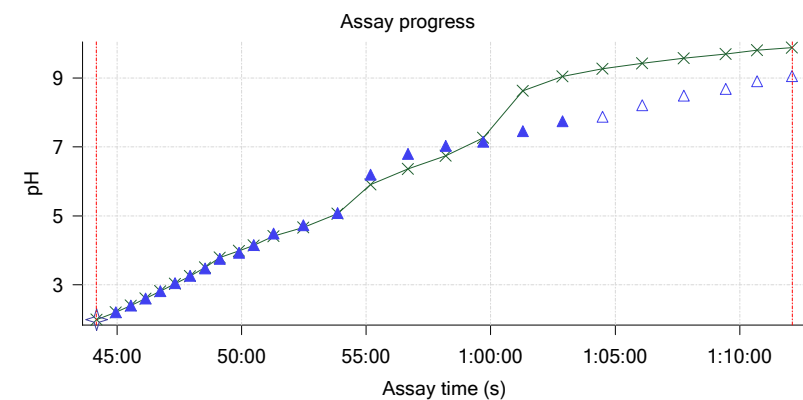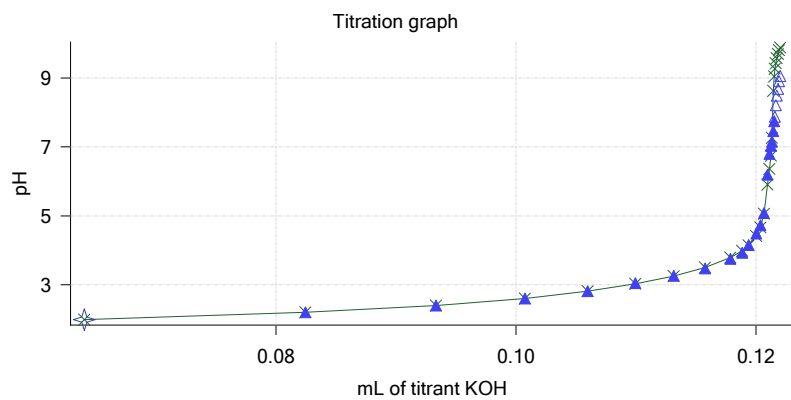



Sample name: **M12\_octanol**  
 Assay name: **pH-metric high logP**  
 Assay ID: **18C-03013**  
 Filename: **C:\Sirius\_T3\Mehtap\20180302\_exp29\_logP\_T3-2\18C-03013\_M12\_octanol\_pH-metric high logP.t3r**

Experiment start time: **3/3/2018 4:33:34 PM**  
 Analyst: **Pion**  
 Instrument ID: **T312060**

## Other graphs (continued)

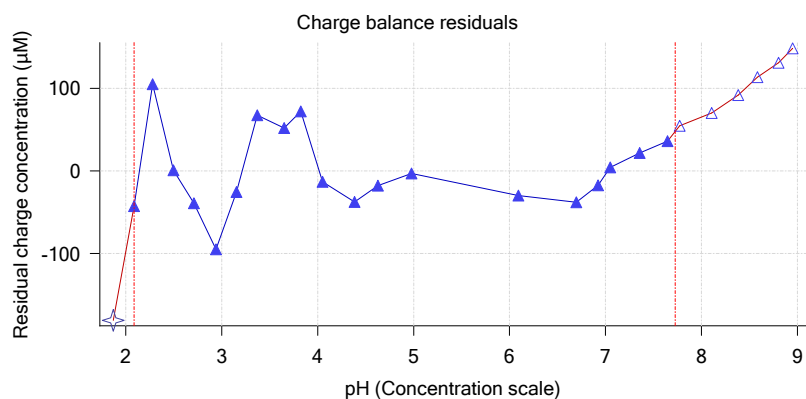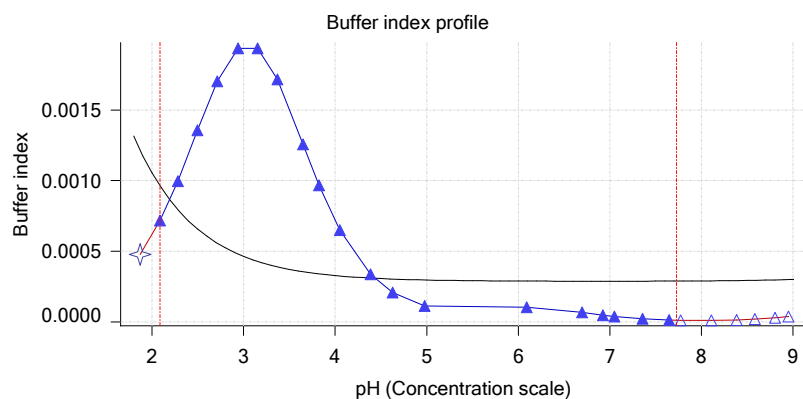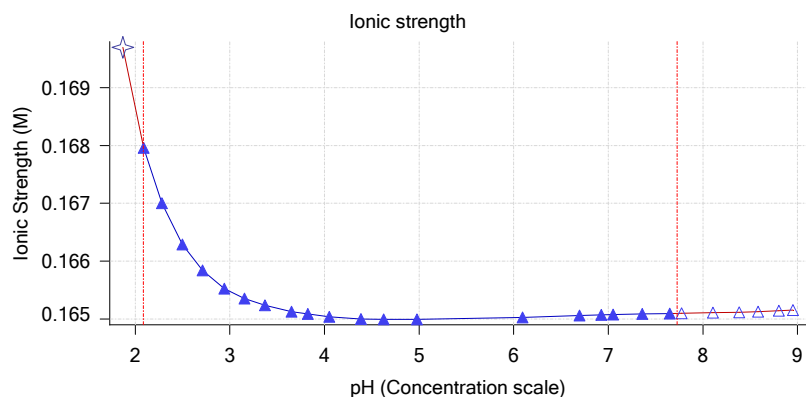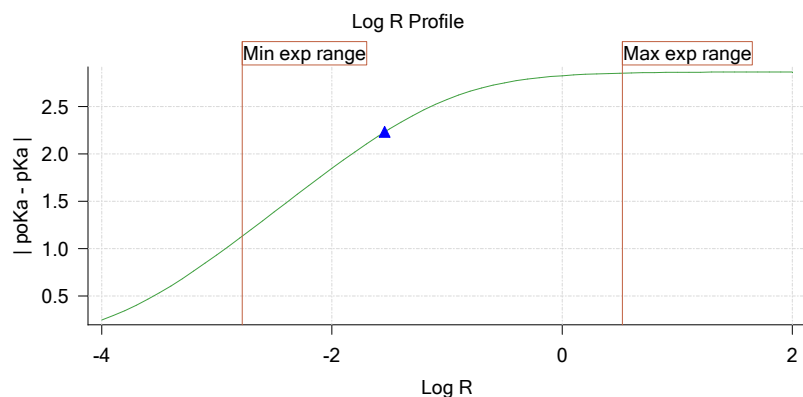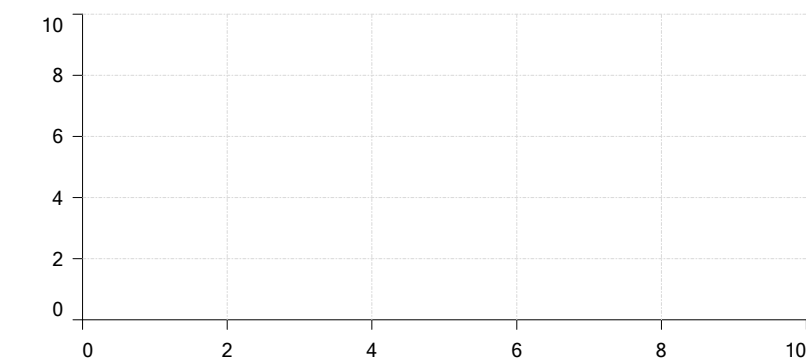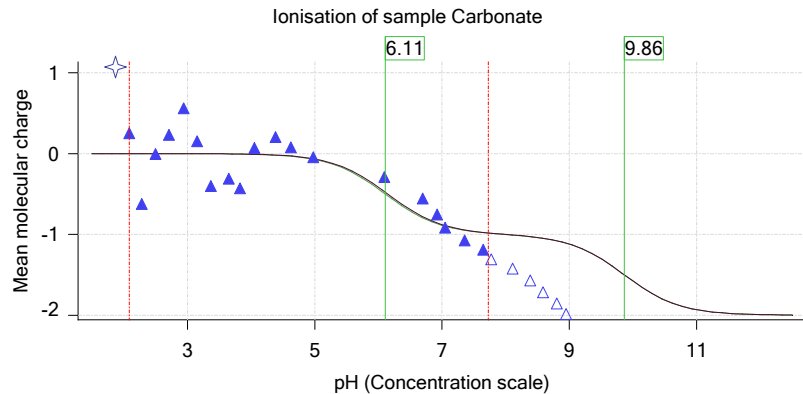

Sample name: **M12\_octanol** Experiment start time: **3/3/2018 4:33:34 PM**  
 Assay name: **pH-metric high logP** Analyst: **Pion**  
 Assay ID: **18C-03013** Instrument ID: **T312060**  
 Filename: **C:\Sirius\_T3\Mehtap\20180302\_exp29\_logP\_T3-2\18C-03013\_M12\_octanol\_pH-metric high logP.t3r**

pH-metric high logP Titration 3 of 3 18C-03013 Points 57 to 80

## Overall results

RMSD 0.527  
 Average ionic strength 0.172 M  
 Average temperature 25.0°C  
 Partition ratio 0.1351 : 1  
 Analyte concentration range 3639.4 µM to 3752.4 µM  
 Total points considered 20 of 24

## Warnings and errors

Errors None  
 Warnings None

## Four-Plus parameters

 Alpha 0.111 3/3/2018 4:33:34 PM C:\Sirius\_T3\HCl18C02.t3r  
 S 0.9988 3/3/2018 4:33:34 PM C:\Sirius\_T3\HCl18C02.t3r  
 jH 1.0 3/3/2018 4:33:34 PM C:\Sirius\_T3\HCl18C02.t3r  
 jOH -0.8 3/3/2018 4:33:34 PM C:\Sirius\_T3\HCl18C02.t3r

## Titrants

 0.50 M HCl 0.999058 3/3/2018 4:33:34 PM C:\Sirius\_T3\HCl18C02.t3r  
 0.50 M KOH 0.999845 3/3/2018 4:33:34 PM C:\Sirius\_T3\KOH18B27.t3r

## Sample

 M12\_octanol concentration factor 1.090  
 M12\_octanol stoichiometry 1.000  
 Chloride stoichiometry 1.000  
 Base pKa 1 5.28  
 logP (XH +) 1.02  
 logP (neutral X) 4.20

## Sample graphs

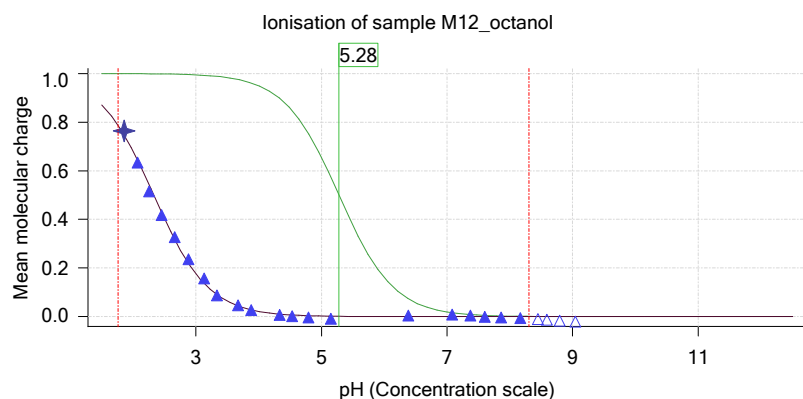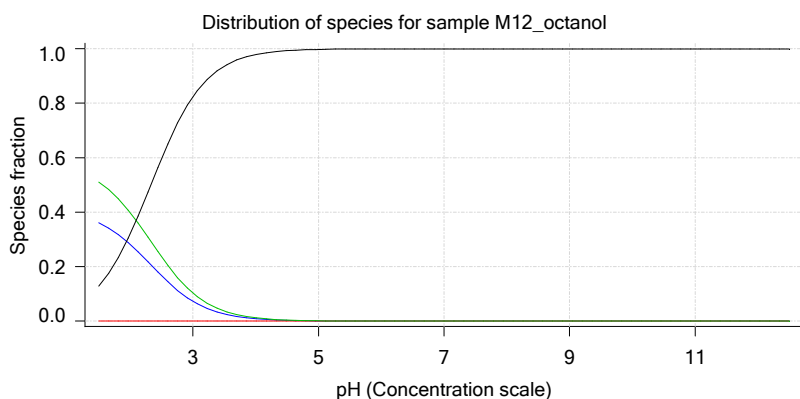

Sample name: **M12\_octanol**  
Assay name: **pH-metric high logP**  
Assay ID: **18C-03013**  
Filename: **C:\Sirius\_T3\Mehtap\20180302\_exp29\_logP\_T3-2\18C-03013\_M12\_octanol\_pH-metric high logP.t3r**

Experiment start time: **3/3/2018 4:33:34 PM**  
Analyst: **Pion**  
Instrument ID: **T312060**

## Sample graphs (continued)

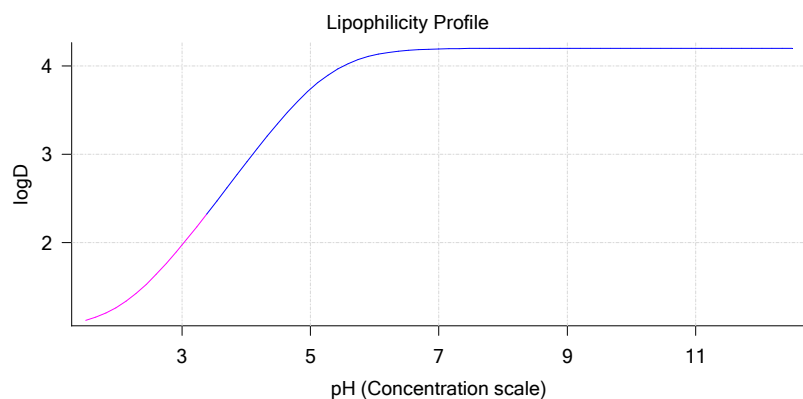

## Sample logD and percent species

| pH     | M12_octanol<br>logD | M12_octanol<br>M12_octanolH | M12_octanol<br>M12_octanol | M12_octanol<br>M12_octanolH* | M12_octanol<br>M12_octanol* | Comment    |
|--------|---------------------|-----------------------------|----------------------------|------------------------------|-----------------------------|------------|
| 1.000  | 1.05                | 39.56 %                     | 0.00 %                     | 55.97 %                      | 4.47 %                      | Stomach pH |
| 1.200  | 1.07                | 38.55 %                     | 0.00 %                     | 54.54 %                      | 6.90 %                      |            |
| 2.000  | 1.27                | 28.21 %                     | 0.01 %                     | 39.91 %                      | 31.87 %                     |            |
| 3.000  | 1.97                | 7.29 %                      | 0.04 %                     | 10.31 %                      | 82.36 %                     |            |
| 4.000  | 2.91                | 0.87 %                      | 0.05 %                     | 1.23 %                       | 97.86 %                     |            |
| 5.000  | 3.74                | 0.09 %                      | 0.05 %                     | 0.12 %                       | 99.74 %                     |            |
| 6.000  | 4.13                | 0.01 %                      | 0.05 %                     | 0.01 %                       | 99.93 %                     | Blood pH   |
| 6.500  | 4.18                | 0.00 %                      | 0.05 %                     | 0.00 %                       | 99.95 %                     |            |
| 7.000  | 4.19                | 0.00 %                      | 0.05 %                     | 0.00 %                       | 99.95 %                     |            |
| 7.400  | 4.20                | 0.00 %                      | 0.05 %                     | 0.00 %                       | 99.95 %                     |            |
| 8.000  | 4.20                | 0.00 %                      | 0.05 %                     | 0.00 %                       | 99.95 %                     |            |
| 9.000  | 4.20                | 0.00 %                      | 0.05 %                     | 0.00 %                       | 99.95 %                     |            |
| 10.000 | 4.20                | 0.00 %                      | 0.05 %                     | 0.00 %                       | 99.95 %                     |            |
| 11.000 | 4.20                | 0.00 %                      | 0.05 %                     | 0.00 %                       | 99.95 %                     |            |
| 12.000 | 4.20                | 0.00 %                      | 0.05 %                     | 0.00 %                       | 99.95 %                     |            |

## Carbonate and acidity

Carbonate 0.180 mM  
Acidity error -0.944 mM

## Other graphs

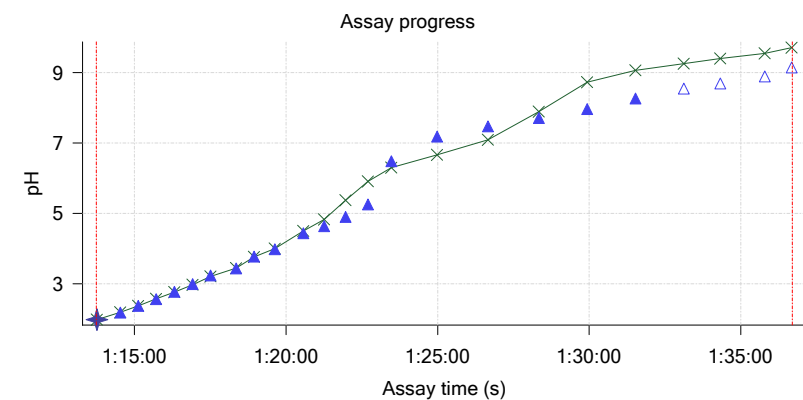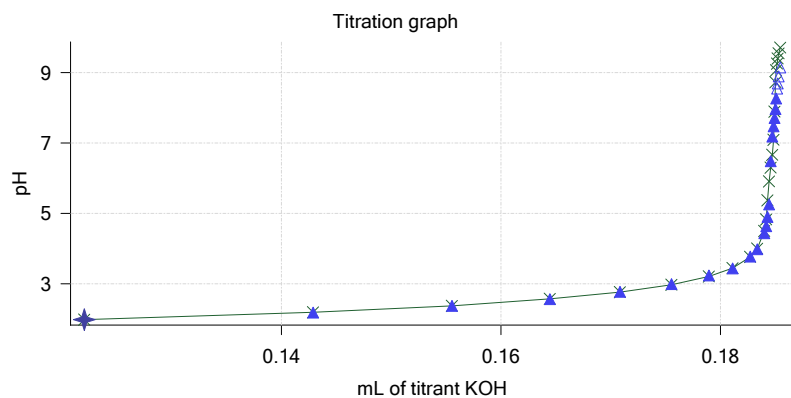

Sample name: **M12\_octanol**  
 Assay name: **pH-metric high logP**  
 Assay ID: **18C-03013**  
 Filename: **C:\Sirius\_T3\Mehtap\20180302\_exp29\_logP\_T3-2\18C-03013\_M12\_octanol\_pH-metric high logP.t3r**

Experiment start time: **3/3/2018 4:33:34 PM**  
 Analyst: **Pion**  
 Instrument ID: **T312060**

## Other graphs (continued)

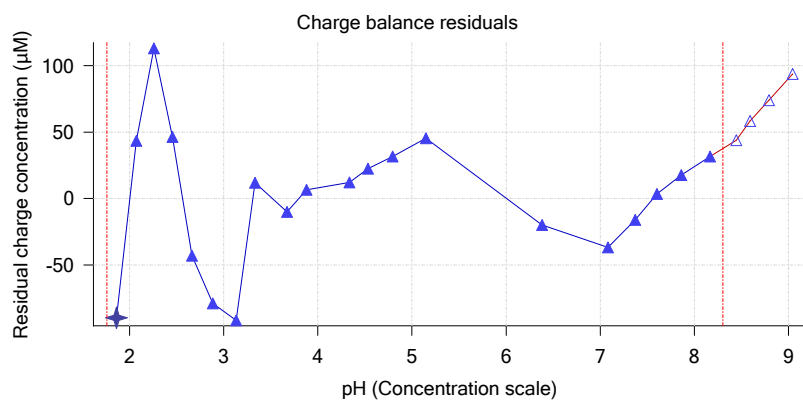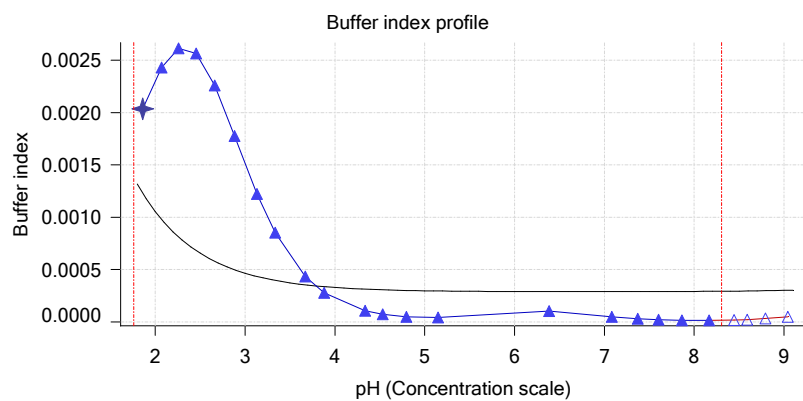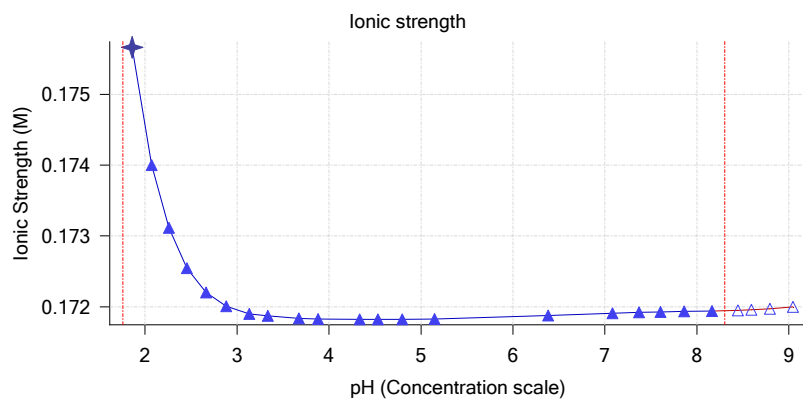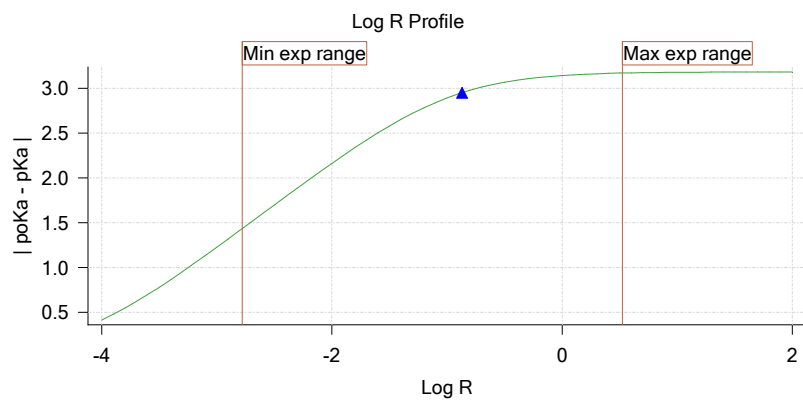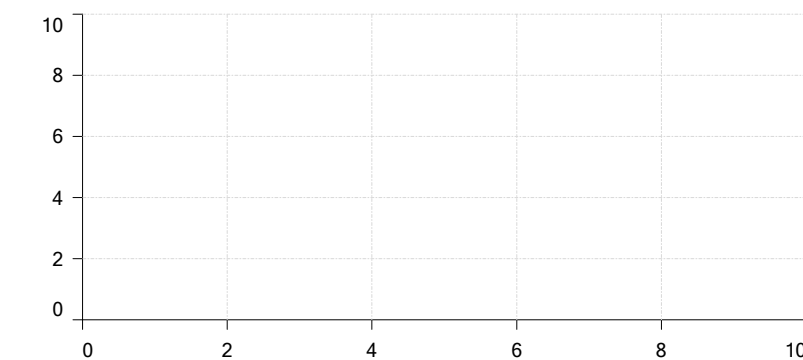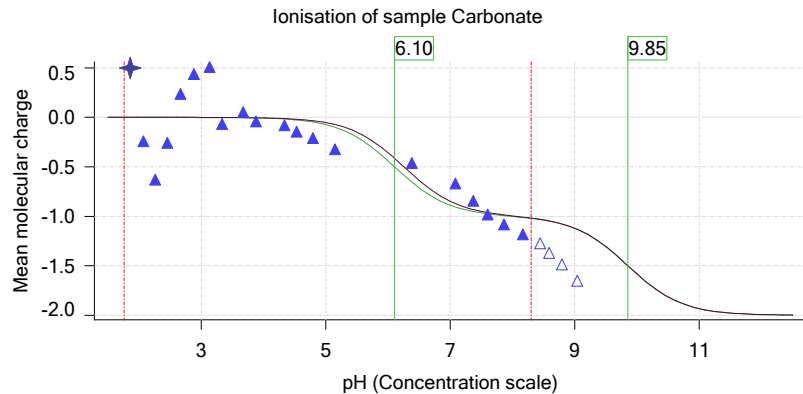

Sample name: **M12\_octanol**  
 Assay name: **pH-metric high logP**  
 Assay ID: **18C-03013**  
 Filename: **C:\Sirius\_T3\Mehtap\20180302\_exp29\_logP\_T3-2\18C-03013\_M12\_octanol\_pH-metric high logP.t3r**

Experiment start time: **3/3/2018 4:33:34 PM**  
 Analyst: **Pion**  
 Instrument ID: **T312060**

## Assay Model

| Settings                          | Value        | Date/Time changed    | Imported from           |
|-----------------------------------|--------------|----------------------|-------------------------|
| Sample name                       | M12_octanol  | 2/28/2018 2:58:36 PM | User entered value      |
| Sample by                         | Weight       |                      | Default value           |
| Sample weight                     | 0.002240 g   | 3/2/2018 5:10:19 PM  | User entered value      |
| Formula weight                    | 292.16 g/mol | 2/28/2018 2:58:36 PM | User entered value      |
| Solubility                        | Unknown      |                      | Default value           |
| Molecular weight                  | 255.70       | 2/28/2018 2:58:36 PM | User entered value      |
| Individual pKa ionic environments | No           |                      | Default value           |
| Number of pKas                    | 1            | 2/28/2018 2:58:36 PM | User entered value      |
| Sample is a                       | Base         | 2/28/2018 2:58:36 PM | User entered value      |
| pKa 1                             | 5.28         | 2/28/2018 2:58:36 PM | User entered value      |
| logp (XH +)                       | 1.02         | 3/2/2018 3:44:28 PM  | User entered value      |
| logP (neutral X)                  | 3.79         | 3/2/2018 3:44:35 PM  | User entered value      |
| Stoichiometry                     | 1.00000      |                      | Default value           |
| Aprotic counterion name           | Chloride     |                      | From standards.xml file |
| Stoichiometry                     | 1.00         |                      | From standards.xml file |
| Charge per counterion             | -1           |                      | From standards.xml file |

## Events

| Time    | Event             | Water      | Acid       | Base       | Octanol    | pH    | dpH/dt   | pH R-squared | pH SD   | dpH/dt time         |
|---------|-------------------|------------|------------|------------|------------|-------|----------|--------------|---------|---------------------|
| 5:59.7  | Initial pH = 4.07 |            |            |            |            |       |          |              |         |                     |
| 8:59.3  | Data point 1      | 1.50000 mL | 0.05094 mL | 0.00682 mL | 0.01999 mL | 1.993 | 0.00166  | 0.09032      | 0.00027 | 10.0 s              |
| 9:45.6  | Data point 2      | 1.50000 mL | 0.05094 mL | 0.02354 mL | 0.01999 mL | 2.195 | -0.01016 | 0.27478      | 0.00096 | 10.0 s              |
| 10:21.2 | Data point 3      | 1.50000 mL | 0.05094 mL | 0.03356 mL | 0.01999 mL | 2.380 | -0.00393 | 0.49609      | 0.00028 | 10.0 s              |
| 10:56.8 | Data point 4      | 1.50000 mL | 0.05094 mL | 0.04036 mL | 0.01999 mL | 2.583 | -0.01061 | 0.30160      | 0.00095 | 10.0 s              |
| 11:32.3 | Data point 5      | 1.50000 mL | 0.05094 mL | 0.04504 mL | 0.01999 mL | 2.791 | -0.00615 | 0.53625      | 0.00041 | 10.0 s              |
| 12:07.9 | Data point 6      | 1.50000 mL | 0.05094 mL | 0.04849 mL | 0.01999 mL | 2.973 | -0.01184 | 0.89998      | 0.00062 | 10.0 s              |
| 12:43.3 | Data point 7      | 1.50000 mL | 0.05094 mL | 0.05141 mL | 0.01999 mL | 3.161 | -0.01641 | 0.89430      | 0.00086 | 10.0 s              |
| 13:18.8 | Data point 8      | 1.50000 mL | 0.05094 mL | 0.05402 mL | 0.01999 mL | 3.380 | -0.01816 | 0.97797      | 0.00091 | 10.0 s              |
| 13:54.4 | Data point 9      | 1.50000 mL | 0.05094 mL | 0.05640 mL | 0.01999 mL | 3.621 | -0.01999 | 0.98251      | 0.00100 | 11.0 s              |
| 14:41.2 | Data point 10     | 1.50000 mL | 0.05094 mL | 0.05851 mL | 0.01999 mL | 3.854 | -0.01872 | 0.92596      | 0.00096 | 11.5 s              |
| 15:18.1 | Data point 11     | 1.50000 mL | 0.05094 mL | 0.06016 mL | 0.01999 mL | 4.021 | -0.07914 | 0.99504      | 0.00392 | Timed out at 59.5 s |
| 16:43.6 | Data point 12     | 1.50000 mL | 0.05094 mL | 0.06082 mL | 0.01999 mL | 4.014 | -0.06809 | 0.99320      | 0.00337 | Timed out at 59.5 s |
| 18:09.0 | Data point 13     | 1.50000 mL | 0.05094 mL | 0.06150 mL | 0.01999 mL | 4.183 | -0.04322 | 0.98848      | 0.00215 | Timed out at 59.5 s |
| 19:34.3 | Data point 14     | 1.50000 mL | 0.05094 mL | 0.06204 mL | 0.01999 mL | 4.377 | -0.02931 | 0.97915      | 0.00146 | Timed out at 59.5 s |
| 20:59.7 | Data point 15     | 1.50000 mL | 0.05094 mL | 0.06242 mL | 0.01999 mL | 4.584 | -0.01998 | 0.99064      | 0.00099 | 48.5 s              |
| 22:13.6 | Data point 16     | 1.50000 mL | 0.05094 mL | 0.06265 mL | 0.01999 mL | 4.745 | -0.01777 | 0.91711      | 0.00092 | 54.0 s              |
| 23:33.1 | Data point 17     | 1.50000 mL | 0.05094 mL | 0.06282 mL | 0.01999 mL | 4.902 | -0.01909 | 0.98788      | 0.00095 | 46.5 s              |
| 24:50.2 | Data point 18     | 1.50000 mL | 0.05094 mL | 0.06296 mL | 0.01999 mL | 5.053 | -0.01967 | 0.95681      | 0.00099 | 57.5 s              |
| 26:13.2 | Data point 19     | 1.50000 mL | 0.05094 mL | 0.06305 mL | 0.01999 mL | 5.207 | -0.02130 | 0.95071      | 0.00108 | Timed out at 59.5 s |
| 27:43.7 | Data point 20     | 1.50000 mL | 0.05094 mL | 0.06315 mL | 0.01999 mL | 5.387 | -0.01948 | 0.92987      | 0.00100 | 57.5 s              |
| 29:11.7 | Data point 21     | 1.50000 mL | 0.05094 mL | 0.06322 mL | 0.01999 mL | 5.573 | -0.01912 | 0.95211      | 0.00097 | 59.0 s              |
| 30:41.3 | Data point 22     | 1.50000 mL | 0.05094 mL | 0.06329 mL | 0.01999 mL | 5.905 | -0.01889 | 0.90762      | 0.00098 | 51.5 s              |
| 32:03.4 | Data point 23     | 1.50000 mL | 0.05094 mL | 0.06341 mL | 0.01999 mL | 6.675 | -0.01975 | 0.98665      | 0.00098 | 57.0 s              |
| 33:31.0 | Data point 24     | 1.50000 mL | 0.05094 mL | 0.06352 mL | 0.01999 mL | 7.182 | -0.02923 | 0.95987      | 0.00147 | Timed out at 59.5 s |
| 35:06.7 | Data point 25     | 1.50000 mL | 0.05094 mL | 0.06364 mL | 0.01999 mL | 7.640 | -0.04416 | 0.98507      | 0.00220 | Timed out at 59.5 s |
| 36:42.3 | Data point 26     | 1.50000 mL | 0.05094 mL | 0.06371 mL | 0.01999 mL | 7.920 | -0.03822 | 0.98044      | 0.00191 | Timed out at 59.5 s |
| 38:17.9 | Data point 27     | 1.50000 mL | 0.05094 mL | 0.06378 mL | 0.01999 mL | 8.284 | -0.02815 | 0.97144      | 0.00141 | Timed out at 59.5 s |

Sample name: **M12\_octanol**  
 Assay name: **pH-metric high logP**  
 Assay ID: **18C-03013**  
 Filename: **C:\Sirius\_T3\Mehtap\20180302\_exp29\_logP\_T3-2\18C-03013\_M12\_octanol\_pH-metric high logP.t3r**

Experiment start time: **3/3/2018 4:33:34 PM**  
 Analyst: **Pion**  
 Instrument ID: **T312060**

## Events (continued)

| Time      | Event         | Water      | Acid       | Base       | Octanol    | pH    | dpH/dt   | pH R-squared | pH SD   | dpH/dt time         |
|-----------|---------------|------------|------------|------------|------------|-------|----------|--------------|---------|---------------------|
| 39:53.6   | Data point 28 | 1.50000 mL | 0.05094 mL | 0.06385 mL | 0.01999 mL | 8.653 | -0.01851 | 0.94276      | 0.00094 | 56.5 s              |
| 41:25.8   | Data point 29 | 1.50000 mL | 0.05094 mL | 0.06395 mL | 0.01999 mL | 8.880 | -0.01941 | 0.93233      | 0.00099 | 43.5 s              |
| 42:40.0   | Data point 30 | 1.50000 mL | 0.05094 mL | 0.06404 mL | 0.01999 mL | 9.109 | -0.01865 | 0.94873      | 0.00095 | 37.5 s              |
| 44:11.2   | Data point 31 | 1.50000 mL | 0.10868 mL | 0.06404 mL | 0.05000 mL | 1.992 | -0.01464 | 0.98078      | 0.00073 | 10.0 s              |
| 44:57.5   | Data point 32 | 1.50000 mL | 0.10868 mL | 0.08246 mL | 0.05000 mL | 2.204 | -0.00623 | 0.39555      | 0.00049 | 10.0 s              |
| 45:33.2   | Data point 33 | 1.50000 mL | 0.10868 mL | 0.09334 mL | 0.05000 mL | 2.395 | 0.00024  | 0.00175      | 0.00029 | 10.0 s              |
| 46:08.8   | Data point 34 | 1.50000 mL | 0.10868 mL | 0.10075 mL | 0.05000 mL | 2.608 | 0.00510  | 0.08694      | 0.00085 | 10.0 s              |
| 46:44.4   | Data point 35 | 1.50000 mL | 0.10868 mL | 0.10597 mL | 0.05000 mL | 2.821 | -0.00756 | 0.57280      | 0.00049 | 10.0 s              |
| 47:19.9   | Data point 36 | 1.50000 mL | 0.10868 mL | 0.10995 mL | 0.05000 mL | 3.049 | -0.00595 | 0.80766      | 0.00033 | 10.5 s              |
| 47:56.0   | Data point 37 | 1.50000 mL | 0.10868 mL | 0.11315 mL | 0.05000 mL | 3.262 | -0.00544 | 0.73730      | 0.00031 | 10.5 s              |
| 48:32.0   | Data point 38 | 1.50000 mL | 0.10868 mL | 0.11578 mL | 0.05000 mL | 3.477 | -0.00488 | 0.14223      | 0.00064 | 10.0 s              |
| 49:07.5   | Data point 39 | 1.50000 mL | 0.10868 mL | 0.11787 mL | 0.05000 mL | 3.757 | -0.00502 | 0.11123      | 0.00074 | 10.5 s              |
| 49:53.8   | Data point 40 | 1.50000 mL | 0.10868 mL | 0.11886 mL | 0.05000 mL | 3.930 | -0.01303 | 0.75605      | 0.00074 | 10.5 s              |
| 50:29.7   | Data point 41 | 1.50000 mL | 0.10868 mL | 0.11940 mL | 0.05000 mL | 4.156 | -0.01560 | 0.85505      | 0.00083 | 12.0 s              |
| 51:17.4   | Data point 42 | 1.50000 mL | 0.10868 mL | 0.12004 mL | 0.05000 mL | 4.490 | -0.01911 | 0.93383      | 0.00098 | 46.0 s              |
| 52:28.8   | Data point 43 | 1.50000 mL | 0.10868 mL | 0.12039 mL | 0.05000 mL | 4.732 | -0.01804 | 0.90169      | 0.00094 | 52.0 s              |
| 53:51.5   | Data point 44 | 1.50000 mL | 0.10868 mL | 0.12067 mL | 0.05000 mL | 5.082 | -0.01877 | 0.92983      | 0.00096 | 48.5 s              |
| 55:10.7   | Data point 45 | 1.50000 mL | 0.10868 mL | 0.12098 mL | 0.05000 mL | 6.196 | -0.03857 | 0.98173      | 0.00192 | Timed out at 59.5 s |
| 56:41.2   | Data point 46 | 1.50000 mL | 0.10868 mL | 0.12114 mL | 0.05000 mL | 6.798 | -0.04966 | 0.98696      | 0.00247 | Timed out at 59.5 s |
| 58:11.7   | Data point 47 | 1.50000 mL | 0.10868 mL | 0.12126 mL | 0.05000 mL | 7.026 | -0.03315 | 0.95815      | 0.00167 | Timed out at 59.5 s |
| 59:42.2   | Data point 48 | 1.50000 mL | 0.10868 mL | 0.12136 mL | 0.05000 mL | 7.152 | -0.03446 | 0.98537      | 0.00171 | Timed out at 59.5 s |
| 1:01:17.8 | Data point 49 | 1.50000 mL | 0.10868 mL | 0.12145 mL | 0.05000 mL | 7.458 | -0.05118 | 0.98692      | 0.00254 | Timed out at 59.5 s |
| 1:02:53.4 | Data point 50 | 1.50000 mL | 0.10868 mL | 0.12152 mL | 0.05000 mL | 7.749 | -0.09026 | 0.98237      | 0.00450 | Timed out at 59.5 s |
| 1:04:29.0 | Data point 51 | 1.50000 mL | 0.10868 mL | 0.12159 mL | 0.05000 mL | 7.874 | -0.07009 | 0.98935      | 0.00348 | Timed out at 59.5 s |
| 1:06:04.6 | Data point 52 | 1.50000 mL | 0.10868 mL | 0.12166 mL | 0.05000 mL | 8.208 | -0.05709 | 0.99176      | 0.00283 | Timed out at 59.5 s |
| 1:07:45.4 | Data point 53 | 1.50000 mL | 0.10868 mL | 0.12175 mL | 0.05000 mL | 8.485 | -0.02993 | 0.97232      | 0.00150 | Timed out at 59.5 s |
| 1:09:26.2 | Data point 54 | 1.50000 mL | 0.10868 mL | 0.12185 mL | 0.05000 mL | 8.684 | -0.01638 | 0.69410      | 0.00097 | 39.5 s              |
| 1:10:41.4 | Data point 55 | 1.50000 mL | 0.10868 mL | 0.12194 mL | 0.05000 mL | 8.903 | -0.01932 | 0.91951      | 0.00099 | 53.5 s              |
| 1:12:05.4 | Data point 56 | 1.50000 mL | 0.10868 mL | 0.12204 mL | 0.05000 mL | 9.050 | -0.01983 | 0.98693      | 0.00099 | 37.0 s              |
| 1:13:45.4 | Data point 57 | 1.50000 mL | 0.17119 mL | 0.12204 mL | 0.25000 mL | 1.982 | -0.00868 | 0.51882      | 0.00059 | 10.0 s              |
| 1:14:31.7 | Data point 58 | 1.50000 mL | 0.17119 mL | 0.14287 mL | 0.25000 mL | 2.187 | -0.00313 | 0.29423      | 0.00028 | 10.0 s              |
| 1:15:07.5 | Data point 59 | 1.50000 mL | 0.17119 mL | 0.15553 mL | 0.25000 mL | 2.372 | 0.00043  | 0.02077      | 0.00015 | 10.0 s              |
| 1:15:43.1 | Data point 60 | 1.50000 mL | 0.17119 mL | 0.16446 mL | 0.25000 mL | 2.567 | -0.00212 | 0.35123      | 0.00018 | 10.5 s              |
| 1:16:19.2 | Data point 61 | 1.50000 mL | 0.17119 mL | 0.17084 mL | 0.25000 mL | 2.773 | 0.00623  | 0.11536      | 0.00091 | 10.0 s              |
| 1:16:54.7 | Data point 62 | 1.50000 mL | 0.17119 mL | 0.17552 mL | 0.25000 mL | 2.992 | -0.00796 | 0.85989      | 0.00042 | 10.0 s              |
| 1:17:30.2 | Data point 63 | 1.50000 mL | 0.17119 mL | 0.17893 mL | 0.25000 mL | 3.240 | -0.00517 | 0.42305      | 0.00039 | 10.0 s              |
| 1:18:21.2 | Data point 64 | 1.50000 mL | 0.17119 mL | 0.18109 mL | 0.25000 mL | 3.441 | 0.00207  | 0.09593      | 0.00033 | 10.0 s              |
| 1:18:56.8 | Data point 65 | 1.50000 mL | 0.17119 mL | 0.18271 mL | 0.25000 mL | 3.778 | -0.00557 | 0.68049      | 0.00033 | 10.5 s              |
| 1:19:37.9 | Data point 66 | 1.50000 mL | 0.17119 mL | 0.18335 mL | 0.25000 mL | 3.987 | -0.00947 | 0.83986      | 0.00051 | 10.0 s              |
| 1:20:33.9 | Data point 67 | 1.50000 mL | 0.17119 mL | 0.18398 mL | 0.25000 mL | 4.440 | -0.01073 | 0.32598      | 0.00093 | 11.0 s              |
| 1:21:15.4 | Data point 68 | 1.50000 mL | 0.17119 mL | 0.18415 mL | 0.25000 mL | 4.637 | -0.01956 | 0.95178      | 0.00099 | 17.0 s              |
| 1:21:57.9 | Data point 69 | 1.50000 mL | 0.17119 mL | 0.18429 mL | 0.25000 mL | 4.901 | -0.01572 | 0.83949      | 0.00085 | 13.5 s              |
| 1:22:41.9 | Data point 70 | 1.50000 mL | 0.17119 mL | 0.18443 mL | 0.25000 mL | 5.253 | -0.01459 | 0.61037      | 0.00092 | 15.5 s              |
| 1:23:28.0 | Data point 71 | 1.50000 mL | 0.17119 mL | 0.18457 mL | 0.25000 mL | 6.486 | -0.02584 | 0.99076      | 0.00128 | Timed out at 59.5 s |
| 1:24:58.6 | Data point 72 | 1.50000 mL | 0.17119 mL | 0.18471 mL | 0.25000 mL | 7.185 | -0.06008 | 0.98340      | 0.00299 | Timed out at 59.5 s |

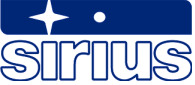

# Assay Events

Sample name: **M12\_octanol** Experiment start time: **3/3/2018 4:33:34 PM**  
Assay name: **pH-metric high logP** Analyst: **Pion**  
Assay ID: **18C-03013** Instrument ID: **T312060**  
Filename: **C:\Sirius\_T3\Mehtap\20180302\_exp29\_logP\_T3-2\18C-03013\_M12\_octanol\_pH-metric high logP.t3r**

## Events (continued)

| Time      | Event         | Water      | Acid       | Base       | Octanol    | pH    | dpH/dt   | pH R-squared | pH SD   | dpH/dt time         |
|-----------|---------------|------------|------------|------------|------------|-------|----------|--------------|---------|---------------------|
| 1:26:39.3 | Data point 73 | 1.50000 mL | 0.17119 mL | 0.18483 mL | 0.25000 mL | 7.473 | -0.04422 | 0.98321      | 0.00220 | Timed out at 59.5 s |
| 1:28:20.1 | Data point 74 | 1.50000 mL | 0.17119 mL | 0.18493 mL | 0.25000 mL | 7.705 | -0.05489 | 0.98906      | 0.00273 | Timed out at 59.5 s |
| 1:29:55.7 | Data point 75 | 1.50000 mL | 0.17119 mL | 0.18499 mL | 0.25000 mL | 7.963 | -0.05454 | 0.98638      | 0.00271 | Timed out at 59.5 s |
| 1:31:31.4 | Data point 76 | 1.50000 mL | 0.17119 mL | 0.18507 mL | 0.25000 mL | 8.267 | -0.04359 | 0.97797      | 0.00218 | Timed out at 59.5 s |
| 1:33:06.9 | Data point 77 | 1.50000 mL | 0.17119 mL | 0.18514 mL | 0.25000 mL | 8.545 | -0.01535 | 0.64494      | 0.00094 | 37.0 s              |
| 1:34:19.6 | Data point 78 | 1.50000 mL | 0.17119 mL | 0.18521 mL | 0.25000 mL | 8.691 | -0.01787 | 0.92709      | 0.00092 | 57.5 s              |
| 1:35:47.7 | Data point 79 | 1.50000 mL | 0.17119 mL | 0.18530 mL | 0.25000 mL | 8.893 | -0.01116 | 0.33380      | 0.00095 | 17.5 s              |
| 1:36:40.9 | Data point 80 | 1.50000 mL | 0.17119 mL | 0.18544 mL | 0.25000 mL | 9.143 | -0.01321 | 0.57777      | 0.00086 | 13.0 s              |
| 1:37:02.9 | Assay volumes | 1.50000 mL | 0.17119 mL | 0.18544 mL | 0.25000 mL |       |          |              |         |                     |

Sample name: **M12\_octanol**  
 Assay name: **pH-metric high logP**  
 Assay ID: **18C-03013**  
 Filename: **C:\Sirius\_T3\Mehtap\20180302\_exp29\_logP\_T3-2\18C-03013\_M12\_octanol\_pH-metric high logP.t3r**

Experiment start time: **3/3/2018 4:33:34 PM**  
 Analyst: **Pion**  
 Instrument ID: **T312060**

## Assay Settings

| Setting                             | Value              | Original Value | Date/Time changed | Imported from |
|-------------------------------------|--------------------|----------------|-------------------|---------------|
| <b>General Settings</b>             |                    |                |                   |               |
| Analyst name                        | Pion               |                |                   |               |
| <b>Standard Experiment Settings</b> |                    |                |                   |               |
| Number of titrations                | 3                  |                |                   |               |
| Minimum pH                          | 2.000              |                |                   |               |
| Maximum pH                          | 9.000              |                |                   |               |
| pH step between points of           | 0.200              |                |                   |               |
| Minimum titrant addition            | 0.00002 mL         |                |                   |               |
| Maximum titrant addition            | 0.10000 mL         |                |                   |               |
| Argon flow rate                     | 100%               |                |                   |               |
| Start titration using               | Cautious pH adjust |                |                   |               |
| <b>Advanced General Settings</b>    |                    |                |                   |               |
| Detect turbidity using              | None               |                |                   |               |
| Collect turbidity sensor data       | No                 |                |                   |               |
| Collect UV spectra                  | No                 |                |                   |               |
| Stir after titrant addition for     | 5 seconds          |                |                   |               |
| For titrant addition, stir at       | 10%                |                |                   |               |
| <b>Titration Pre-Dose</b>           |                    |                |                   |               |
| Titration pre-dose                  | None               |                |                   |               |
| <b>Assay Medium</b>                 |                    |                |                   |               |
| ISA water volume                    | 1.50 mL            |                |                   |               |
| Water added                         | Automatic          |                |                   |               |
| Partition solvent type              | Octanol            |                |                   |               |
| Partition volume                    | 0.020 mL           |                |                   |               |
| Partition solvent added             | Automatic          |                |                   |               |
| After partition addition, stir for  | 1 seconds          |                |                   |               |
| <b>Sample Sonication</b>            |                    |                |                   |               |
| Sonicate                            | Yes                |                |                   |               |
| Adjust pH for sonication            | No                 |                |                   |               |
| Sonicate for                        | 120 seconds        |                |                   |               |
| After sonication stir for           | 5 seconds          |                |                   |               |
| <b>Sample Dissolution</b>           |                    |                |                   |               |
| Perform a dissolution stage         | Yes                |                |                   |               |
| Adjust and hold pH for dissolution  | To start pH        |                |                   |               |
| Stir to dissolve for                | 120 seconds        |                |                   |               |
| For dissolution, stir at            | 10%                |                |                   |               |
| <b>Carbonate purge</b>              |                    |                |                   |               |
| Perform a carbonate purge           | No                 |                |                   |               |
| <b>Temperature Control</b>          |                    |                |                   |               |
| Wait for temperature                | Yes                |                |                   |               |
| Required start temperature          | 25.0°C             |                |                   |               |
| Acceptable deviation                | 0.5°C              |                |                   |               |
| Time to wait                        | 60 seconds         |                |                   |               |
| Stir speed of                       | 50%                |                |                   |               |
| <b>Titration 1</b>                  |                    |                |                   |               |
| Titrate from                        | Low to high pH     |                |                   |               |
| Adjust to start pH                  | Yes                |                |                   |               |
| After pH adjust stir for            | 30 seconds         |                |                   |               |
| Stir to allow partitioning for      | 15 seconds         |                |                   |               |
| Stirrer speed for partitioning      | 50%                |                |                   |               |
| <b>Titration 2</b>                  |                    |                |                   |               |
| Titrate from                        | Low to high pH     |                |                   |               |
| Add additional water                | 0.00 mL            |                |                   |               |
| Additional partition solvent volume | 0.030 mL           |                |                   |               |
| Additional partition solvent added  | Automatic          |                |                   |               |
| After pH adjust stir for            | 30 seconds         |                |                   |               |
| Stir to allow partitioning for      | 15 seconds         |                |                   |               |
| Stirrer speed for partitioning      | 55%                |                |                   |               |



Sample name: **M12\_octanol**  
 Assay name: **pH-metric high logP**  
 Assay ID: **18C-03013**  
 Filename: **C:\Sirius\_T3\Mehtap\20180302\_exp29\_logP\_T3-2\18C-03013\_M12\_octanol\_pH-metric high logP.t3r**

Experiment start time: **3/3/2018 4:33:34 PM**  
 Analyst: **Pion**  
 Instrument ID: **T312060**

## Assay Settings (continued)

| Setting                             | Value          | Original Value | Date/Time changed | Imported from |
|-------------------------------------|----------------|----------------|-------------------|---------------|
| <b>Titration 3</b>                  |                |                |                   |               |
| Titrate from                        | Low to high pH |                |                   |               |
| Add additional water                | 0.00 mL        |                |                   |               |
| Additional partition solvent volume | 0.200 mL       |                |                   |               |
| Additional partition solvent added  | Automatic      |                |                   |               |
| After pH adjust stir for            | 30 seconds     |                |                   |               |
| Stir to allow partitioning for      | 15 seconds     |                |                   |               |
| Stirrer speed for partitioning      | 60%            |                |                   |               |
| <b>Data Point Stability</b>         |                |                |                   |               |
| Stir during data point collection   | No             |                |                   |               |
| Delay before data point collection  | 0 seconds      |                |                   |               |
| Number of points to average         | 20 points      |                |                   |               |
| Time interval between points        | 0.50 seconds   |                |                   |               |
| Required maximum standard deviation | 0.00100 dpH/dt |                |                   |               |
| Stability timeout after             | 60 seconds     |                |                   |               |

## Calibration Settings

| Setting                   | Value  | Date/Time changed   | Imported from             |
|---------------------------|--------|---------------------|---------------------------|
| Four-Plus alpha           | 0.111  | 3/3/2018 4:33:34 PM | C:\Sirius_T3\HCl18C02.t3r |
| Four-Plus S               | 0.9988 | 3/3/2018 4:33:34 PM | C:\Sirius_T3\HCl18C02.t3r |
| Four-Plus jH              | 1.0    | 3/3/2018 4:33:34 PM | C:\Sirius_T3\HCl18C02.t3r |
| Four-Plus jOH             | -0.8   | 3/3/2018 4:33:34 PM | C:\Sirius_T3\HCl18C02.t3r |
| Base concentration factor | 1.000  | 3/3/2018 4:33:34 PM | C:\Sirius_T3\KOH18B27.t3r |
| Acid concentration factor | 0.999  | 3/3/2018 4:33:34 PM | C:\Sirius_T3\HCl18C02.t3r |

## Instrument Settings

| Setting              | Value                      | Batch Id    | Install date           |
|----------------------|----------------------------|-------------|------------------------|
| Instrument owner     | Merck                      |             |                        |
| Instrument ID        | T312060                    |             |                        |
| Instrument type      | T3 Simulator               |             |                        |
| Software version     | 1.1.3.0                    |             |                        |
| Dispenser module     |                            | T3DM1200361 | 3/31/2009 5:24:52 AM   |
| Dispenser 0          | Water                      |             | 3/31/2009 5:25:05 AM   |
| Syringe volume       | 2.5 mL                     |             |                        |
| Firmware version     | 1.2.1(r2)                  |             |                        |
| Titrant              | Water (0.15 M KCl)         | 02-06-2018  | 2/27/2018 10:05:59 AM  |
| Dispenser 2          | Acid                       |             | 3/31/2009 5:25:11 AM   |
| Syringe volume       | 0.5 mL                     |             |                        |
| Firmware version     | 1.2.1(r2)                  |             |                        |
| Titrant              | Acid (0.5 M HCl)           | 02-27-2018  | 2/27/2018 10:27:22 AM  |
| Dispenser 1          | Base                       |             | 3/31/2009 5:25:21 AM   |
| Syringe volume       | 0.5 mL                     |             |                        |
| Firmware version     | 1.2.1(r2)                  |             |                        |
| Titrant              | Base (0.5 M KOH)           | 9/22/2017   | 2/27/2018 10:21:22 AM  |
| Dispenser 5          | Cosolvent                  |             | 3/31/2009 5:26:24 AM   |
| Syringe volume       | 2.5 mL                     |             |                        |
| Firmware version     | 1.2.1(r2)                  |             |                        |
| Distribution valve 5 | Distribution Valve         |             | 3/31/2009 5:28:19 AM   |
| Firmware version     | 1.1.3                      |             |                        |
| Port A               | Methanol (80%, 0.15 M KCl) | 09-26-17    | 2/7/2018 9:42:01 AM    |
| Port B               | Cyclohexane                | 11-01-17    | 2/27/2018 10:37:57 AM  |
| Dispenser 3          | Buffer                     |             | 8/3/2010 5:05:16 AM    |
| Syringe volume       | 0.5 mL                     |             |                        |
| Firmware version     | 1.2.1(r2)                  |             |                        |
| Titrant              | Dodecane                   | 2018/01/31  | 2/28/2018 10:18:04 AM  |
| Dispenser 6          | Octanol                    |             | 10/22/2010 10:52:43 AM |

Sample name: **M12\_octanol** Experiment start time: **3/3/2018 4:33:34 PM**  
 Assay name: **pH-metric high logP** Analyst: **Pion**  
 Assay ID: **18C-03013** Instrument ID: **T312060**  
 Filename: **C:\Sirius\_T3\Mehtap\20180302\_exp29\_logP\_T3-2\18C-03013\_M12\_octanol\_pH-metric high logP.t3r**

## Instrument Settings (continued)

| Setting                                   | Value                      | Batch Id    | Install date           |
|-------------------------------------------|----------------------------|-------------|------------------------|
| Syringe volume                            | 0.5 mL                     |             |                        |
| Firmware version                          | 1.2.1(r2)                  |             |                        |
| Titrant                                   | Octanol                    | 01-31-2018  | 2/27/2018 9:59:35 AM   |
| Titration                                 |                            | T3TM1200161 | 3/31/2009 5:24:17 AM   |
| Horizontal axis firmware version          | 1.17 AI1DI2DO2 Stepper 2   |             |                        |
| Vertical axis firmware version            | 1.17 AI1DI2DO2 Stepper 2   |             |                        |
| Chassis I/O firmware version              | 1.11 AI1DI0DO4 Norgren I/O |             |                        |
| Probe I/O firmware version                | 1.1.1                      |             |                        |
| Electrode                                 | T3 Electrode               | T3E0923     | 1/23/2018 2:01:00 PM   |
| E0 calibration                            | +6.23 mV                   |             | 3/3/2018 4:34:02 PM    |
| Filling solution                          | 3M KCl                     | KCL097      | 3/2/2018 9:43:24 AM    |
| Liquids                                   |                            |             |                        |
| Wash 1                                    | 50% IPA:50% Water          |             | 3/2/2018 9:45:12 AM    |
| Wash 2                                    | 0.5% Triton X-100 in H2O   |             | 3/2/2018 9:45:15 AM    |
| Buffer position 1                         | pH7 Wash                   |             | 3/2/2018 9:45:18 AM    |
| Buffer position 2                         | pH 7                       |             | 3/2/2018 9:45:21 AM    |
| Storage position                          |                            |             | 3/2/2018 9:44:44 AM    |
| Wash water                                | 6.6e+003 mL                | 02-27-2018  | 2/27/2018 9:54:39 AM   |
| Waste                                     | 8.8e+003 mL                |             | 11/28/2017 10:36:29 AM |
| Temperature controller                    |                            |             | 8/5/2010 6:35:13 AM    |
| Turbidity detector                        |                            |             | 3/31/2009 5:24:45 AM   |
| Spectrometer                              |                            | 074811      | 11/23/2010 11:22:28 AM |
| Dip probe                                 |                            | 10196       |                        |
| Wavelength coefficient A0                 | 183.333                    |             |                        |
| Wavelength coefficient A1                 | 2.21568                    |             |                        |
| Wavelength coefficient A2                 | -0.000289308               |             |                        |
| Total lamp lit time                       | 120:41:49                  |             | 11/23/2010 11:22:28 AM |
| Calibrated on                             | 2/27/2018 10:40:38 AM      |             |                        |
| Integration time                          | 40                         |             |                        |
| Scans averaged                            | 10                         |             |                        |
| Autoloader                                |                            | T3AL1200345 | 11/10/2015 9:34:13 AM  |
| Left-right axis firmware version          | 1.17 AI1DI2DO2 Stepper 2   |             |                        |
| Front-back axis firmware version          | 1.17 AI1DI2DO2 Stepper 2   |             |                        |
| Vertical axis firmware version            | 1.17 AI1DI2DO2 Stepper 2   |             |                        |
| Chassis I/O firmware version              | 1.11 AI1DI0DO4 Norgren I/O |             |                        |
| Configuration                             |                            |             |                        |
| Alternate titration position              | Titration position         |             |                        |
| Alternate reference position              | Reference position         |             |                        |
| Maximum standard vial volume              | 3.50 mL                    |             |                        |
| Maximum alternate vial volume             | 25.00 mL                   |             |                        |
| Automatic action idle period              | 5 minute(s)                |             |                        |
| Titration tube volume                     | 1.3 mL                     |             |                        |
| Syringe flush count                       | 3.50                       |             |                        |
| Flowing wash pump volume                  | 20.0 mL                    |             |                        |
| Flowing wash stir duration                | 5 s                        |             |                        |
| Flowing wash stir speed                   | 30%                        |             |                        |
| Solvent wash stir duration                | 5 s                        |             |                        |
| Solvent wash stir speed                   | 30%                        |             |                        |
| Surfactant wash stir duration             | 5 s                        |             |                        |
| Surfactant wash stir speed                | 30%                        |             |                        |
| E0 calibration minimum number of points   | 10                         |             |                        |
| E0 calibration maximum standard deviation | 0.01500                    |             |                        |
| E0 calibration timeout period             | 60 s                       |             |                        |
| E0 calibration stir duration              | 5 s                        |             |                        |
| E0 calibration preparation stir speed     | 30%                        |             |                        |
| E0 calibration buffer wash stir duration  | 5 s                        |             |                        |
| E0 calibration buffer wash stir speed     | 30%                        |             |                        |
| E0 calibration reading stir speed         | 0%                         |             |                        |

|              |                                                                                                   |                        |                            |
|--------------|---------------------------------------------------------------------------------------------------|------------------------|----------------------------|
| Sample name: | <b>M12_octanol</b>                                                                                | Experiment start time: | <b>3/3/2018 4:33:34 PM</b> |
| Assay name:  | <b>pH-metric high logP</b>                                                                        | Analyst:               | <b>Pion</b>                |
| Assay ID:    | <b>18C-03013</b>                                                                                  | Instrument ID:         | <b>T312060</b>             |
| Filename:    | <b>C:\Sirius_T3\Mehtap\20180302_exp29_logP_T3-2\18C-03013_M12_octanol_pH-metric high logP.t3r</b> |                        |                            |

## Instrument Settings (continued)

| Setting                                     | Value   | Batch Id | Install date |
|---------------------------------------------|---------|----------|--------------|
| Spectrometer calibration stir duration      | 5 s     |          |              |
| Spectrometer calibration stir speed         | 30%     |          |              |
| Spectrometer calibration wash pump volume   | 20.0 mL |          |              |
| Spectrometer calibration wash stir duration | 5 s     |          |              |
| Spectrometer calibration wash stir speed    | 30%     |          |              |
| Overhead dispense height                    | 10000   |          |              |

## Refinement Settings

| Setting                        | Value    | Default value |
|--------------------------------|----------|---------------|
| Turbidity detection method     | None     | None          |
| Turbidity wavelength to assess | 500.0 nm | 500.0 nm      |
| Turbidity maximum absorbance   | 0.100    | 0.100         |
| Turbidity probe threshold      | 50.00    | 50.00         |

## Experiment Log

[2:37] Air gap created for Water (0.15 M KCl)  
 [2:38] Air gap created for Acid (0.5 M HCl)  
 [2:38] Air gap created for Base (0.5 M KOH)  
 [2:38] Air gap released for Water (0.15 M KCl)  
 [2:42] Titrator arm moved over Titration position  
 [2:42] Titration 1 of 3  
 [2:42] Adding initial titrants  
 [2:42] Automatically add 1.50000 mL of water  
 [3:07] Dispensed 1.500000 mL of Water (0.15 M KCl)  
 [3:12] Titrator arm moved over Drain  
 [5:53] Titrator arm moved to Titration position  
 [5:53] Argon flow rate set to 100  
 [5:53] Stirrer speed set to 10  
 [5:58] Automatically add 0.02000 mL of Octanol  
 [5:59] Dispensed 0.019991 mL of Octanol  
 [6:00] Initial pH = 4.07  
 [6:00] Iterative adjust 4.07 -> 2.00  
 [6:00] pH 4.07 -> 2.00  
 [6:01] Air gap released for Acid (0.5 M HCl)  
 [6:02] Dispensed 0.050941 mL of Acid (0.5 M HCl)  
 [6:07] Holding pH 2.00  
 [8:07] Stirrer speed set to 0  
 [8:07] Stirrer speed set to 50  
 [8:07] Iterative adjust 1.94 -> 2.00  
 [8:07] pH 1.94 -> 2.00  
 [8:08] Air gap released for Base (0.5 M KOH)  
 [8:09] Dispensed 0.006820 mL of Base (0.5 M KOH)  
 [8:59] Stirrer speed set to 0  
 [9:09] Datapoint id 1 collected  
 [9:09] Stirrer speed set to 50  
 [9:14] pH 2.00 -> 2.20  
 [9:14] Using cautious pH adjust  
 [9:15] Dispensed 0.007902 mL of Base (0.5 M KOH)  
 [9:20] Stepping pH = 2.08  
 [9:20] Dispensed 0.006985 mL of Base (0.5 M KOH)  
 [9:25] Stepping pH = 2.17  
 [9:25] Dispensed 0.001834 mL of Base (0.5 M KOH)  
 [9:30] Stepping pH = 2.20  
 [9:45] Stirrer speed set to 0  
 [9:55] Datapoint id 2 collected  
 [9:55] Charge balance equation is out by -5.8%  
 [9:55] Stirrer speed set to 50

Sample name: **M12\_octanol**  
Assay name: **pH-metric high logP**  
Assay ID: **18C-03013**  
Filename: **C:\Sirius\_T3\Mehtap\20180302\_exp29\_logP\_T3-2\18C-03013\_M12\_octanol\_pH-metric high logP.t3r**

Experiment start time: **3/3/2018 4:33:34 PM**  
Analyst: **Pion**  
Instrument ID: **T312060**

## Experiment Log (continued)

[10:01] pH 2.20 -> 2.40  
[10:01] Using charge balance adjust  
[10:01] Dispensed 0.010019 mL of Base (0.5 M KOH)  
[10:21] Stirrer speed set to 0  
[10:31] Datapoint id 3 collected  
[10:31] Charge balance equation is out by -11.0%  
[10:31] Stirrer speed set to 50  
[10:36] pH 2.39 -> 2.59  
[10:36] Using charge balance adjust  
[10:36] Dispensed 0.006797 mL of Base (0.5 M KOH)  
[10:57] Stirrer speed set to 0  
[11:07] Datapoint id 4 collected  
[11:07] Charge balance equation is out by -2.1%  
[11:07] Stirrer speed set to 50  
[11:12] pH 2.59 -> 2.79  
[11:12] Using charge balance adjust  
[11:12] Dispensed 0.004680 mL of Base (0.5 M KOH)  
[11:32] Stirrer speed set to 0  
[11:42] Datapoint id 5 collected  
[11:42] Charge balance equation is out by 0.9%  
[11:42] Stirrer speed set to 50  
[11:47] pH 2.80 -> 3.00  
[11:47] Using charge balance adjust  
[11:48] Dispensed 0.003457 mL of Base (0.5 M KOH)  
[12:08] Stirrer speed set to 0  
[12:18] Datapoint id 6 collected  
[12:18] Charge balance equation is out by -12.7%  
[12:18] Stirrer speed set to 50  
[12:23] pH 2.98 -> 3.18  
[12:23] Using charge balance adjust  
[12:23] Dispensed 0.002916 mL of Base (0.5 M KOH)  
[12:43] Stirrer speed set to 0  
[12:53] Datapoint id 7 collected  
[12:53] Charge balance equation is out by -8.1%  
[12:53] Stirrer speed set to 50  
[12:58] pH 3.17 -> 3.37  
[12:58] Using charge balance adjust  
[12:58] Dispensed 0.002611 mL of Base (0.5 M KOH)  
[13:19] Stirrer speed set to 0  
[13:29] Datapoint id 8 collected  
[13:29] Charge balance equation is out by 7.3%  
[13:29] Stirrer speed set to 50  
[13:34] pH 3.38 -> 3.58  
[13:34] Using charge balance adjust  
[13:34] Dispensed 0.002375 mL of Base (0.5 M KOH)  
[13:54] Stirrer speed set to 0  
[14:05] Datapoint id 9 collected  
[14:05] Charge balance equation is out by 18.9%  
[14:05] Stirrer speed set to 50  
[14:10] pH 3.62 -> 3.82  
[14:10] Using cautious pH adjust  
[14:10] Dispensed 0.001035 mL of Base (0.5 M KOH)  
[14:16] Stepping pH = 3.77  
[14:16] Dispensed 0.000329 mL of Base (0.5 M KOH)  
[14:21] Stepping pH = 3.77  
[14:21] Dispensed 0.000753 mL of Base (0.5 M KOH)  
[14:26] Stepping pH = 3.89  
[14:41] Stirrer speed set to 0  
[14:53] Datapoint id 10 collected

Sample name: **M12\_octanol**  
 Assay name: **pH-metric high logP**  
 Assay ID: **18C-03013**  
 Filename: **C:\Sirius\_T3\Mehtap\20180302\_exp29\_logP\_T3-2\18C-03013\_M12\_octanol\_pH-metric high logP.t3r**

Experiment start time: **3/3/2018 4:33:34 PM**  
 Analyst: **Pion**  
 Instrument ID: **T312060**

## Experiment Log (continued)

[14:53] Charge balance equation is out by -3.0%  
 [14:53] Stirrer speed set to 50  
 [14:58] pH 3.86 -> 4.06  
 [14:58] Using charge balance adjust  
 [14:58] Dispensed 0.001646 mL of Base (0.5 M KOH)  
 [15:18] Stirrer speed set to 0  
 [16:18] Datapoint id 11 collected  
 [16:18] Charge balance equation is out by -20.9%  
 [16:18] Stirrer speed set to 50  
 [16:23] pH 4.02 -> 4.22  
 [16:23] Using cautious pH adjust  
 [16:23] Dispensed 0.000659 mL of Base (0.5 M KOH)  
 [16:28] Stepping pH = 4.23  
 [16:43] Stirrer speed set to 0  
 [17:43] Datapoint id 12 collected  
 [17:43] Charge balance equation is out by 50.0%  
 [17:43] Stirrer speed set to 50  
 [17:49] pH 4.01 -> 4.21  
 [17:49] Using cautious pH adjust  
 [17:49] Dispensed 0.000682 mL of Base (0.5 M KOH)  
 [17:54] Stepping pH = 4.38  
 [18:09] Stirrer speed set to 0  
 [19:09] Datapoint id 13 collected  
 [19:09] Charge balance equation is out by 50.0%  
 [19:09] Stirrer speed set to 50  
 [19:14] pH 4.18 -> 4.38  
 [19:14] Using cautious pH adjust  
 [19:14] Dispensed 0.000541 mL of Base (0.5 M KOH)  
 [19:19] Stepping pH = 4.58  
 [19:34] Stirrer speed set to 0  
 [20:34] Datapoint id 14 collected  
 [20:34] Charge balance equation is out by 50.0%  
 [20:34] Stirrer speed set to 50  
 [20:39] pH 4.38 -> 4.58  
 [20:39] Using cautious pH adjust  
 [20:39] Dispensed 0.000376 mL of Base (0.5 M KOH)  
 [20:44] Stepping pH = 4.77  
 [21:00] Stirrer speed set to 0  
 [21:48] Datapoint id 15 collected  
 [21:48] Charge balance equation is out by 50.0%  
 [21:48] Stirrer speed set to 50  
 [21:53] pH 4.61 -> 4.81  
 [21:53] Using cautious pH adjust  
 [21:53] Dispensed 0.000235 mL of Base (0.5 M KOH)  
 [21:58] Stepping pH = 4.90  
 [22:14] Stirrer speed set to 0  
 [23:08] Datapoint id 16 collected  
 [23:08] Charge balance equation is out by 50.0%  
 [23:08] Stirrer speed set to 50  
 [23:13] pH 4.77 -> 4.97  
 [23:13] Using cautious pH adjust  
 [23:13] Dispensed 0.000165 mL of Base (0.5 M KOH)  
 [23:18] Stepping pH = 5.01  
 [23:33] Stirrer speed set to 0  
 [24:20] Datapoint id 17 collected  
 [24:20] Charge balance equation is out by 50.0%  
 [24:20] Stirrer speed set to 50  
 [24:25] pH 4.93 -> 5.13  
 [24:25] Using cautious pH adjust

Sample name: **M12\_octanol**  
Assay name: **pH-metric high logP**  
Assay ID: **18C-03013**  
Filename: **C:\Sirius\_T3\Mehtap\20180302\_exp29\_logP\_T3-2\18C-03013\_M12\_octanol\_pH-metric high logP.t3r**

Experiment start time: **3/3/2018 4:33:34 PM**  
Analyst: **Pion**  
Instrument ID: **T312060**

## Experiment Log (continued)

[24:25] Dispensed 0.000118 mL of Base (0.5 M KOH)  
[24:30] Stepping pH = 5.12  
[24:30] Dispensed 0.000024 mL of Base (0.5 M KOH)  
[24:35] Stepping pH = 5.14  
[24:50] Stirrer speed set to 0  
[25:48] Datapoint id 18 collected  
[25:48] Charge balance equation is out by 42.0%  
[25:48] Stirrer speed set to 50  
[25:53] pH 5.09 -> 5.29  
[25:53] Using cautious pH adjust  
[25:53] Dispensed 0.000094 mL of Base (0.5 M KOH)  
[25:58] Stepping pH = 5.30  
[26:13] Stirrer speed set to 0  
[27:13] Datapoint id 19 collected  
[27:13] Charge balance equation is out by 50.0%  
[27:13] Stirrer speed set to 50  
[27:18] pH 5.22 -> 5.42  
[27:18] Using cautious pH adjust  
[27:18] Dispensed 0.000071 mL of Base (0.5 M KOH)  
[27:23] Stepping pH = 5.35  
[27:23] Dispensed 0.000024 mL of Base (0.5 M KOH)  
[27:28] Stepping pH = 5.44  
[27:44] Stirrer speed set to 0  
[28:41] Datapoint id 20 collected  
[28:41] Charge balance equation is out by 30.4%  
[28:41] Stirrer speed set to 50  
[28:46] pH 5.39 -> 5.59  
[28:46] Using cautious pH adjust  
[28:46] Dispensed 0.000047 mL of Base (0.5 M KOH)  
[28:51] Stepping pH = 5.50  
[28:51] Dispensed 0.000024 mL of Base (0.5 M KOH)  
[28:56] Stepping pH = 5.60  
[29:12] Stirrer speed set to 0  
[30:11] Datapoint id 21 collected  
[30:11] Charge balance equation is out by 20.0%  
[30:11] Stirrer speed set to 50  
[30:16] pH 5.58 -> 5.78  
[30:16] Using cautious pH adjust  
[30:16] Dispensed 0.000047 mL of Base (0.5 M KOH)  
[30:21] Stepping pH = 5.73  
[30:21] Dispensed 0.000024 mL of Base (0.5 M KOH)  
[30:26] Stepping pH = 5.90  
[30:41] Stirrer speed set to 0  
[31:33] Datapoint id 22 collected  
[31:33] Charge balance equation is out by 25.8%  
[31:33] Stirrer speed set to 50  
[31:38] pH 5.90 -> 6.10  
[31:38] Using cautious pH adjust  
[31:38] Dispensed 0.000024 mL of Base (0.5 M KOH)  
[31:43] Stepping pH = 5.91  
[31:43] Dispensed 0.000094 mL of Base (0.5 M KOH)  
[31:48] Stepping pH = 6.63  
[32:03] Stirrer speed set to 0  
[33:00] Datapoint id 23 collected  
[33:00] Charge balance equation is out by -90.2%  
[33:00] Stirrer speed set to 50  
[33:06] pH 6.63 -> 6.83  
[33:06] Using cautious pH adjust  
[33:06] Dispensed 0.000024 mL of Base (0.5 M KOH)



Sample name: **M12\_octanol**  
Assay name: **pH-metric high logP**  
Assay ID: **18C-03013**  
Filename: **C:\Sirius\_T3\Mehtap\20180302\_exp29\_logP\_T3-2\18C-03013\_M12\_octanol\_pH-metric high logP.t3r**

Experiment start time: **3/3/2018 4:33:34 PM**  
Analyst: **Pion**  
Instrument ID: **T312060**

## Experiment Log (continued)

[33:11] Stepping pH = 6.61  
[33:11] Dispensed 0.000094 mL of Base (0.5 M KOH)  
[33:16] Stepping pH = 7.08  
[33:31] Stirrer speed set to 0  
[34:31] Datapoint id 24 collected  
[34:31] Charge balance equation is out by -229.9%  
[34:31] Stirrer speed set to 50  
[34:36] pH 7.12 -> 7.32  
[34:36] Using cautious pH adjust  
[34:36] Dispensed 0.000024 mL of Base (0.5 M KOH)  
[34:41] Stepping pH = 7.09  
[34:41] Dispensed 0.000047 mL of Base (0.5 M KOH)  
[34:46] Stepping pH = 7.18  
[34:46] Dispensed 0.000047 mL of Base (0.5 M KOH)  
[34:51] Stepping pH = 7.57  
[35:07] Stirrer speed set to 0  
[36:07] Datapoint id 25 collected  
[36:07] Charge balance equation is out by -576.8%  
[36:07] Stirrer speed set to 50  
[36:12] pH 7.58 -> 7.78  
[36:12] Using cautious pH adjust  
[36:12] Dispensed 0.000024 mL of Base (0.5 M KOH)  
[36:17] Stepping pH = 7.57  
[36:17] Dispensed 0.000024 mL of Base (0.5 M KOH)  
[36:22] Stepping pH = 7.63  
[36:22] Dispensed 0.000024 mL of Base (0.5 M KOH)  
[36:27] Stepping pH = 7.82  
[36:42] Stirrer speed set to 0  
[37:42] Datapoint id 26 collected  
[37:42] Charge balance equation is out by -808.4%  
[37:42] Stirrer speed set to 50  
[37:47] pH 7.85 -> 8.05  
[37:47] Using cautious pH adjust  
[37:47] Dispensed 0.000024 mL of Base (0.5 M KOH)  
[37:52] Stepping pH = 7.82  
[37:52] Dispensed 0.000024 mL of Base (0.5 M KOH)  
[37:58] Stepping pH = 7.89  
[37:58] Dispensed 0.000024 mL of Base (0.5 M KOH)  
[38:03] Stepping pH = 8.14  
[38:18] Stirrer speed set to 0  
[39:18] Datapoint id 27 collected  
[39:18] Charge balance equation is out by -902.2%  
[39:18] Stirrer speed set to 50  
[39:23] pH 8.29 -> 8.49  
[39:23] Using cautious pH adjust  
[39:23] Dispensed 0.000024 mL of Base (0.5 M KOH)  
[39:28] Stepping pH = 8.33  
[39:28] Dispensed 0.000024 mL of Base (0.5 M KOH)  
[39:33] Stepping pH = 8.43  
[39:33] Dispensed 0.000024 mL of Base (0.5 M KOH)  
[39:38] Stepping pH = 8.64  
[39:53] Stirrer speed set to 0  
[40:50] Datapoint id 28 collected  
[40:50] Charge balance equation is out by -511.3%  
[40:50] Stirrer speed set to 50  
[40:55] pH 8.63 -> 8.83  
[40:55] Using cautious pH adjust  
[40:55] Dispensed 0.000024 mL of Base (0.5 M KOH)  
[41:00] Stepping pH = 8.59

Sample name: **M12\_octanol**  
Assay name: **pH-metric high logP**  
Assay ID: **18C-03013**  
Filename: **C:\Sirius\_T3\Mehtap\20180302\_exp29\_logP\_T3-2\18C-03013\_M12\_octanol\_pH-metric high logP.t3r**

Experiment start time: **3/3/2018 4:33:34 PM**  
Analyst: **Pion**  
Instrument ID: **T312060**

## Experiment Log (continued)

[41:00] Dispensed 0.000047 mL of Base (0.5 M KOH)  
[41:05] Stepping pH = 8.78  
[41:05] Dispensed 0.000024 mL of Base (0.5 M KOH)  
[41:11] Stepping pH = 8.93  
[41:26] Stirrer speed set to 0  
[42:09] Datapoint id 29 collected  
[42:09] Charge balance equation is out by -393.5%  
[42:09] Stirrer speed set to 50  
[42:14] pH 8.86 -> 9.05  
[42:14] Using cautious pH adjust  
[42:14] Dispensed 0.000024 mL of Base (0.5 M KOH)  
[42:20] Stepping pH = 8.86  
[42:20] Dispensed 0.000071 mL of Base (0.5 M KOH)  
[42:25] Stepping pH = 9.12  
[42:40] Stirrer speed set to 0  
[43:17] Datapoint id 30 collected  
[43:17] Charge balance equation is out by -226.3%  
[43:17] Titration 2 of 3  
[43:17] Adding initial titrants  
[43:17] Automatically add 0.03000 mL of Octanol  
[43:18] Dispensed 0.030009 mL of Octanol  
[43:18] Stirrer speed set to 10  
[43:19] Stirrer speed set to 55  
[43:19] Iterative adjust 9.11 -> 2.00  
[43:19] pH 9.11 -> 2.00  
[43:21] Dispensed 0.057738 mL of Acid (0.5 M HCl)  
[44:11] Stirrer speed set to 0  
[44:21] Datapoint id 31 collected  
[44:21] Stirrer speed set to 55  
[44:26] pH 2.00 -> 2.20  
[44:26] Using cautious pH adjust  
[44:27] Dispensed 0.008537 mL of Base (0.5 M KOH)  
[44:32] Stepping pH = 2.08  
[44:32] Dispensed 0.007855 mL of Base (0.5 M KOH)  
[44:37] Stepping pH = 2.17  
[44:37] Dispensed 0.002023 mL of Base (0.5 M KOH)  
[44:42] Stepping pH = 2.21  
[44:57] Stirrer speed set to 0  
[45:07] Datapoint id 32 collected  
[45:07] Charge balance equation is out by -7.9%  
[45:07] Stirrer speed set to 55  
[45:13] pH 2.21 -> 2.41  
[45:13] Using charge balance adjust  
[45:13] Dispensed 0.010889 mL of Base (0.5 M KOH)  
[45:33] Stirrer speed set to 0  
[45:43] Datapoint id 33 collected  
[45:43] Charge balance equation is out by -6.8%  
[45:43] Stirrer speed set to 55  
[45:48] pH 2.40 -> 2.60  
[45:48] Using charge balance adjust  
[45:48] Dispensed 0.007408 mL of Base (0.5 M KOH)  
[46:09] Stirrer speed set to 0  
[46:19] Datapoint id 34 collected  
[46:19] Charge balance equation is out by 2.4%  
[46:19] Stirrer speed set to 55  
[46:24] pH 2.61 -> 2.81  
[46:24] Using charge balance adjust  
[46:24] Dispensed 0.005221 mL of Base (0.5 M KOH)  
[46:44] Stirrer speed set to 0



Sample name: **M12\_octanol**  
Assay name: **pH-metric high logP**  
Assay ID: **18C-03013**  
Filename: **C:\Sirius\_T3\Mehtap\20180302\_exp29\_logP\_T3-2\18C-03013\_M12\_octanol\_pH-metric high logP.t3r**

Experiment start time: **3/3/2018 4:33:34 PM**  
Analyst: **Pion**  
Instrument ID: **T312060**

## Experiment Log (continued)

[46:54] Datapoint id 35 collected  
[46:54] Charge balance equation is out by 3.1%  
[46:54] Stirrer speed set to 55  
[46:59] pH 2.83 -> 3.03  
[46:59] Using charge balance adjust  
[47:00] Dispensed 0.003975 mL of Base (0.5 M KOH)  
[47:20] Stirrer speed set to 0  
[47:30] Datapoint id 36 collected  
[47:30] Charge balance equation is out by 11.3%  
[47:30] Stirrer speed set to 55  
[47:35] pH 3.05 -> 3.25  
[47:35] Using charge balance adjust  
[47:36] Dispensed 0.003198 mL of Base (0.5 M KOH)  
[47:56] Stirrer speed set to 0  
[48:06] Datapoint id 37 collected  
[48:06] Charge balance equation is out by 5.8%  
[48:06] Stirrer speed set to 55  
[48:12] pH 3.26 -> 3.46  
[48:12] Using charge balance adjust  
[48:12] Dispensed 0.002634 mL of Base (0.5 M KOH)  
[48:32] Stirrer speed set to 0  
[48:42] Datapoint id 38 collected  
[48:42] Charge balance equation is out by 8.2%  
[48:42] Stirrer speed set to 55  
[48:47] pH 3.48 -> 3.68  
[48:47] Using charge balance adjust  
[48:47] Dispensed 0.002093 mL of Base (0.5 M KOH)  
[49:07] Stirrer speed set to 0  
[49:18] Datapoint id 39 collected  
[49:18] Charge balance equation is out by 39.2%  
[49:18] Stirrer speed set to 55  
[49:23] pH 3.74 -> 3.94  
[49:23] Using cautious pH adjust  
[49:23] Dispensed 0.000729 mL of Base (0.5 M KOH)  
[49:28] Stepping pH = 3.89  
[49:28] Dispensed 0.000188 mL of Base (0.5 M KOH)  
[49:33] Stepping pH = 3.93  
[49:33] Dispensed 0.000071 mL of Base (0.5 M KOH)  
[49:39] Stepping pH = 3.94  
[49:54] Stirrer speed set to 0  
[50:04] Datapoint id 40 collected  
[50:04] Charge balance equation is out by 32.9%  
[50:04] Stirrer speed set to 55  
[50:09] pH 3.93 -> 4.13  
[50:09] Using cautious pH adjust  
[50:09] Dispensed 0.000541 mL of Base (0.5 M KOH)  
[50:14] Stepping pH = 4.19  
[50:30] Stirrer speed set to 0  
[50:42] Datapoint id 41 collected  
[50:42] Charge balance equation is out by 50.0%  
[50:42] Stirrer speed set to 55  
[50:47] pH 4.16 -> 4.36  
[50:47] Using cautious pH adjust  
[50:47] Dispensed 0.000353 mL of Base (0.5 M KOH)  
[50:52] Stepping pH = 4.33  
[50:52] Dispensed 0.000047 mL of Base (0.5 M KOH)  
[50:57] Stepping pH = 4.33  
[50:57] Dispensed 0.000235 mL of Base (0.5 M KOH)  
[51:02] Stepping pH = 4.58

Sample name: **M12\_octanol**  
Assay name: **pH-metric high logP**  
Assay ID: **18C-03013**  
Filename: **C:\Sirius\_T3\Mehtap\20180302\_exp29\_logP\_T3-2\18C-03013\_M12\_octanol\_pH-metric high logP.t3r**

Experiment start time: **3/3/2018 4:33:34 PM**  
Analyst: **Pion**  
Instrument ID: **T312060**

## Experiment Log (continued)

[51:17] Stirrer speed set to 0  
[52:03] Datapoint id 42 collected  
[52:03] Charge balance equation is out by 10.7%  
[52:03] Stirrer speed set to 55  
[52:08] pH 4.50 -> 4.70  
[52:08] Using charge balance adjust  
[52:09] Dispensed 0.000353 mL of Base (0.5 M KOH)  
[52:29] Stirrer speed set to 0  
[53:21] Datapoint id 43 collected  
[53:21] Charge balance equation is out by 15.6%  
[53:21] Stirrer speed set to 55  
[53:26] pH 4.76 -> 4.96  
[53:26] Using cautious pH adjust  
[53:26] Dispensed 0.000094 mL of Base (0.5 M KOH)  
[53:31] Stepping pH = 4.80  
[53:31] Dispensed 0.000188 mL of Base (0.5 M KOH)  
[53:36] Stepping pH = 5.29  
[53:51] Stirrer speed set to 0  
[54:40] Datapoint id 44 collected  
[54:40] Charge balance equation is out by -45.8%  
[54:40] Stirrer speed set to 55  
[54:45] pH 5.11 -> 5.31  
[54:45] Using cautious pH adjust  
[54:45] Dispensed 0.000047 mL of Base (0.5 M KOH)  
[54:50] Stepping pH = 5.10  
[54:50] Dispensed 0.000259 mL of Base (0.5 M KOH)  
[54:55] Stepping pH = 6.40  
[55:11] Stirrer speed set to 0  
[56:11] Datapoint id 45 collected  
[56:11] Charge balance equation is out by -213.5%  
[56:11] Stirrer speed set to 55  
[56:16] pH 6.18 -> 6.38  
[56:16] Using cautious pH adjust  
[56:16] Dispensed 0.000024 mL of Base (0.5 M KOH)  
[56:21] Stepping pH = 6.15  
[56:21] Dispensed 0.000141 mL of Base (0.5 M KOH)  
[56:26] Stepping pH = 6.88  
[56:41] Stirrer speed set to 0  
[57:41] Datapoint id 46 collected  
[57:41] Charge balance equation is out by -239.0%  
[57:41] Stirrer speed set to 55  
[57:46] pH 6.75 -> 6.95  
[57:46] Using cautious pH adjust  
[57:46] Dispensed 0.000024 mL of Base (0.5 M KOH)  
[57:51] Stepping pH = 6.70  
[57:51] Dispensed 0.000094 mL of Base (0.5 M KOH)  
[57:56] Stepping pH = 7.05  
[58:12] Stirrer speed set to 0  
[59:12] Datapoint id 47 collected  
[59:12] Charge balance equation is out by -295.8%  
[59:12] Stirrer speed set to 55  
[59:17] pH 6.96 -> 7.16  
[59:17] Using cautious pH adjust  
[59:17] Dispensed 0.000024 mL of Base (0.5 M KOH)  
[59:22] Stepping pH = 6.90  
[59:22] Dispensed 0.000071 mL of Base (0.5 M KOH)  
[59:27] Stepping pH = 7.18  
[59:42] Stirrer speed set to 0  
[1:00:42] Datapoint id 48 collected

Sample name: **M12\_octanol**  
Assay name: **pH-metric high logP**  
Assay ID: **18C-03013**  
Filename: **C:\Sirius\_T3\Mehtap\20180302\_exp29\_logP\_T3-2\18C-03013\_M12\_octanol\_pH-metric high logP.t3r**

Experiment start time: **3/3/2018 4:33:34 PM**  
Analyst: **Pion**  
Instrument ID: **T312060**

## Experiment Log (continued)

[1:00:42] Charge balance equation is out by -327.5%  
[1:00:42] Stirrer speed set to 55  
[1:00:47] pH 7.10 -> 7.30  
[1:00:47] Using cautious pH adjust  
[1:00:47] Dispensed 0.000024 mL of Base (0.5 M KOH)  
[1:00:52] Stepping pH = 7.09  
[1:00:52] Dispensed 0.000047 mL of Base (0.5 M KOH)  
[1:00:57] Stepping pH = 7.27  
[1:00:57] Dispensed 0.000024 mL of Base (0.5 M KOH)  
[1:01:03] Stepping pH = 7.45  
[1:01:18] Stirrer speed set to 0  
[1:02:18] Datapoint id 49 collected  
[1:02:18] Charge balance equation is out by -423.0%  
[1:02:18] Stirrer speed set to 55  
[1:02:23] pH 7.49 -> 7.69  
[1:02:23] Using cautious pH adjust  
[1:02:23] Dispensed 0.000024 mL of Base (0.5 M KOH)  
[1:02:28] Stepping pH = 7.52  
[1:02:28] Dispensed 0.000024 mL of Base (0.5 M KOH)  
[1:02:33] Stepping pH = 7.64  
[1:02:33] Dispensed 0.000024 mL of Base (0.5 M KOH)  
[1:02:38] Stepping pH = 7.87  
[1:02:53] Stirrer speed set to 0  
[1:03:53] Datapoint id 50 collected  
[1:03:53] Charge balance equation is out by -597.1%  
[1:03:53] Stirrer speed set to 55  
[1:03:58] pH 7.64 -> 7.84  
[1:03:58] Using cautious pH adjust  
[1:03:58] Dispensed 0.000024 mL of Base (0.5 M KOH)  
[1:04:04] Stepping pH = 7.62  
[1:04:04] Dispensed 0.000024 mL of Base (0.5 M KOH)  
[1:04:09] Stepping pH = 7.72  
[1:04:09] Dispensed 0.000024 mL of Base (0.5 M KOH)  
[1:04:14] Stepping pH = 7.86  
[1:04:29] Stirrer speed set to 0  
[1:05:29] Datapoint id 51 collected  
[1:05:29] Charge balance equation is out by -723.3%  
[1:05:29] Stirrer speed set to 55  
[1:05:34] pH 7.76 -> 7.96  
[1:05:34] Using cautious pH adjust  
[1:05:34] Dispensed 0.000024 mL of Base (0.5 M KOH)  
[1:05:39] Stepping pH = 7.75  
[1:05:39] Dispensed 0.000024 mL of Base (0.5 M KOH)  
[1:05:44] Stepping pH = 7.91  
[1:05:44] Dispensed 0.000024 mL of Base (0.5 M KOH)  
[1:05:49] Stepping pH = 8.15  
[1:06:05] Stirrer speed set to 0  
[1:07:05] Datapoint id 52 collected  
[1:07:05] Charge balance equation is out by -787.5%  
[1:07:05] Stirrer speed set to 55  
[1:07:10] pH 8.14 -> 8.34  
[1:07:10] Using cautious pH adjust  
[1:07:10] Dispensed 0.000024 mL of Base (0.5 M KOH)  
[1:07:15] Stepping pH = 8.11  
[1:07:15] Dispensed 0.000024 mL of Base (0.5 M KOH)  
[1:07:20] Stepping pH = 8.17  
[1:07:20] Dispensed 0.000024 mL of Base (0.5 M KOH)  
[1:07:25] Stepping pH = 8.30  
[1:07:25] Dispensed 0.000024 mL of Base (0.5 M KOH)

Sample name: **M12\_octanol**  
Assay name: **pH-metric high logP**  
Assay ID: **18C-03013**  
Filename: **C:\Sirius\_T3\Mehtap\20180302\_exp29\_logP\_T3-2\18C-03013\_M12\_octanol\_pH-metric high logP.t3r**

Experiment start time: **3/3/2018 4:33:34 PM**  
Analyst: **Pion**  
Instrument ID: **T312060**

## Experiment Log (continued)

[1:07:30] Stepping pH = 8.46  
[1:07:45] Stirrer speed set to 0  
[1:08:45] Datapoint id 53 collected  
[1:08:45] Charge balance equation is out by -1,072.2%  
[1:08:45] Stirrer speed set to 55  
[1:08:50] pH 8.40 -> 8.60  
[1:08:50] Using cautious pH adjust  
[1:08:50] Dispensed 0.000024 mL of Base (0.5 M KOH)  
[1:08:56] Stepping pH = 8.40  
[1:08:56] Dispensed 0.000024 mL of Base (0.5 M KOH)  
[1:09:01] Stepping pH = 8.48  
[1:09:01] Dispensed 0.000024 mL of Base (0.5 M KOH)  
[1:09:06] Stepping pH = 8.59  
[1:09:06] Dispensed 0.000024 mL of Base (0.5 M KOH)  
[1:09:11] Stepping pH = 8.69  
[1:09:26] Stirrer speed set to 0  
[1:10:06] Datapoint id 54 collected  
[1:10:06] Charge balance equation is out by -722.4%  
[1:10:06] Stirrer speed set to 55  
[1:10:11] pH 8.66 -> 8.86  
[1:10:11] Using cautious pH adjust  
[1:10:11] Dispensed 0.000024 mL of Base (0.5 M KOH)  
[1:10:16] Stepping pH = 8.66  
[1:10:16] Dispensed 0.000024 mL of Base (0.5 M KOH)  
[1:10:21] Stepping pH = 8.72  
[1:10:21] Dispensed 0.000047 mL of Base (0.5 M KOH)  
[1:10:26] Stepping pH = 8.90  
[1:10:41] Stirrer speed set to 0  
[1:11:35] Datapoint id 55 collected  
[1:11:35] Charge balance equation is out by -320.7%  
[1:11:35] Stirrer speed set to 55  
[1:11:40] pH 8.88 -> 9.05  
[1:11:40] Using cautious pH adjust  
[1:11:40] Dispensed 0.000024 mL of Base (0.5 M KOH)  
[1:11:45] Stepping pH = 8.87  
[1:11:45] Dispensed 0.000071 mL of Base (0.5 M KOH)  
[1:11:50] Stepping pH = 9.03  
[1:12:05] Stirrer speed set to 0  
[1:12:42] Datapoint id 56 collected  
[1:12:42] Charge balance equation is out by -231.7%  
[1:12:42] Titration 3 of 3  
[1:12:42] Adding initial titrants  
[1:12:42] Automatically add 0.20000 mL of Octanol  
[1:12:47] Dispensed 0.200000 mL of Octanol  
[1:12:47] Stirrer speed set to 10  
[1:12:48] Stirrer speed set to 60  
[1:12:48] Iterative adjust 9.05 -> 2.00  
[1:12:48] pH 9.05 -> 2.00  
[1:12:50] Dispensed 0.059784 mL of Acid (0.5 M HCl)  
[1:12:55] pH 2.02 -> 2.00  
[1:12:55] Dispensed 0.002728 mL of Acid (0.5 M HCl)  
[1:13:45] Stirrer speed set to 0  
[1:13:55] Datapoint id 57 collected  
[1:13:55] Stirrer speed set to 60  
[1:14:00] pH 1.99 -> 2.19  
[1:14:00] Using cautious pH adjust  
[1:14:01] Dispensed 0.009619 mL of Base (0.5 M KOH)  
[1:14:06] Stepping pH = 2.07  
[1:14:06] Dispensed 0.008843 mL of Base (0.5 M KOH)

Sample name: **M12\_octanol**  
Assay name: **pH-metric high logP**  
Assay ID: **18C-03013**  
Filename: **C:\Sirius\_T3\Mehtap\20180302\_exp29\_logP\_T3-2\18C-03013\_M12\_octanol\_pH-metric high logP.t3r**

Experiment start time: **3/3/2018 4:33:34 PM**  
Analyst: **Pion**  
Instrument ID: **T312060**

## Experiment Log (continued)

[1:14:11] Stepping pH = 2.16  
[1:14:11] Dispensed 0.002375 mL of Base (0.5 M KOH)  
[1:14:16] Stepping pH = 2.19  
[1:14:32] Stirrer speed set to 0  
[1:14:42] Datapoint id 58 collected  
[1:14:42] Charge balance equation is out by -8.3%  
[1:14:42] Stirrer speed set to 60  
[1:14:47] pH 2.19 -> 2.39  
[1:14:47] Using charge balance adjust  
[1:14:47] Dispensed 0.012653 mL of Base (0.5 M KOH)  
[1:15:07] Stirrer speed set to 0  
[1:15:17] Datapoint id 59 collected  
[1:15:17] Charge balance equation is out by -9.4%  
[1:15:17] Stirrer speed set to 60  
[1:15:22] pH 2.37 -> 2.57  
[1:15:22] Using charge balance adjust  
[1:15:23] Dispensed 0.008937 mL of Base (0.5 M KOH)  
[1:15:43] Stirrer speed set to 0  
[1:15:53] Datapoint id 60 collected  
[1:15:53] Charge balance equation is out by -3.8%  
[1:15:53] Stirrer speed set to 60  
[1:15:59] pH 2.57 -> 2.77  
[1:15:59] Using charge balance adjust  
[1:15:59] Dispensed 0.006373 mL of Base (0.5 M KOH)  
[1:16:19] Stirrer speed set to 0  
[1:16:29] Datapoint id 61 collected  
[1:16:29] Charge balance equation is out by -0.8%  
[1:16:29] Stirrer speed set to 60  
[1:16:34] pH 2.78 -> 2.98  
[1:16:34] Using charge balance adjust  
[1:16:34] Dispensed 0.004680 mL of Base (0.5 M KOH)  
[1:16:55] Stirrer speed set to 0  
[1:17:05] Datapoint id 62 collected  
[1:17:05] Charge balance equation is out by 5.8%  
[1:17:05] Stirrer speed set to 60  
[1:17:10] pH 3.00 -> 3.20  
[1:17:10] Using charge balance adjust  
[1:17:10] Dispensed 0.003410 mL of Base (0.5 M KOH)  
[1:17:30] Stirrer speed set to 0  
[1:17:40] Datapoint id 63 collected  
[1:17:40] Charge balance equation is out by 22.0%  
[1:17:40] Stirrer speed set to 60  
[1:17:45] pH 3.24 -> 3.44  
[1:17:45] Using cautious pH adjust  
[1:17:45] Dispensed 0.001152 mL of Base (0.5 M KOH)  
[1:17:50] Stepping pH = 3.35  
[1:17:51] Dispensed 0.000706 mL of Base (0.5 M KOH)  
[1:17:56] Stepping pH = 3.43  
[1:17:56] Dispensed 0.000141 mL of Base (0.5 M KOH)  
[1:18:01] Stepping pH = 3.43  
[1:18:01] Dispensed 0.000165 mL of Base (0.5 M KOH)  
[1:18:06] Stepping pH = 3.44  
[1:18:21] Stirrer speed set to 0  
[1:18:31] Datapoint id 64 collected  
[1:18:31] Charge balance equation is out by 6.4%  
[1:18:31] Stirrer speed set to 60  
[1:18:36] pH 3.45 -> 3.65  
[1:18:36] Using charge balance adjust  
[1:18:36] Dispensed 0.001623 mL of Base (0.5 M KOH)

Sample name: **M12\_octanol**  
Assay name: **pH-metric high logP**  
Assay ID: **18C-03013**  
Filename: **C:\Sirius\_T3\Mehtap\20180302\_exp29\_logP\_T3-2\18C-03013\_M12\_octanol\_pH-metric high logP.t3r**

Experiment start time: **3/3/2018 4:33:34 PM**  
Analyst: **Pion**  
Instrument ID: **T312060**

## Experiment Log (continued)

[1:18:57] Stirrer speed set to 0  
[1:19:07] Datapoint id 65 collected  
[1:19:07] Charge balance equation is out by 64.7%  
[1:19:07] Stirrer speed set to 60  
[1:19:12] pH 3.79 -> 3.99  
[1:19:12] Using cautious pH adjust  
[1:19:12] Dispensed 0.000423 mL of Base (0.5 M KOH)  
[1:19:17] Stepping pH = 3.90  
[1:19:18] Dispensed 0.000212 mL of Base (0.5 M KOH)  
[1:19:23] Stepping pH = 3.99  
[1:19:38] Stirrer speed set to 0  
[1:19:48] Datapoint id 66 collected  
[1:19:48] Charge balance equation is out by 25.8%  
[1:19:48] Stirrer speed set to 60  
[1:19:53] pH 4.00 -> 4.20  
[1:19:53] Using cautious pH adjust  
[1:19:53] Dispensed 0.000282 mL of Base (0.5 M KOH)  
[1:19:58] Stepping pH = 4.15  
[1:19:58] Dispensed 0.000071 mL of Base (0.5 M KOH)  
[1:20:03] Stepping pH = 4.17  
[1:20:03] Dispensed 0.000047 mL of Base (0.5 M KOH)  
[1:20:08] Stepping pH = 4.18  
[1:20:08] Dispensed 0.000024 mL of Base (0.5 M KOH)  
[1:20:14] Stepping pH = 4.18  
[1:20:14] Dispensed 0.000212 mL of Base (0.5 M KOH)  
[1:20:19] Stepping pH = 4.45  
[1:20:34] Stirrer speed set to 0  
[1:20:45] Datapoint id 67 collected  
[1:20:45] Charge balance equation is out by -17.7%  
[1:20:45] Stirrer speed set to 60  
[1:20:50] pH 4.46 -> 4.66  
[1:20:50] Using cautious pH adjust  
[1:20:50] Dispensed 0.000094 mL of Base (0.5 M KOH)  
[1:20:55] Stepping pH = 4.56  
[1:20:55] Dispensed 0.000071 mL of Base (0.5 M KOH)  
[1:21:00] Stepping pH = 4.66  
[1:21:15] Stirrer speed set to 0  
[1:21:32] Datapoint id 68 collected  
[1:21:32] Charge balance equation is out by 13.8%  
[1:21:32] Stirrer speed set to 60  
[1:21:37] pH 4.64 -> 4.84  
[1:21:37] Using charge balance adjust  
[1:21:38] Dispensed 0.000141 mL of Base (0.5 M KOH)  
[1:21:58] Stirrer speed set to 0  
[1:22:11] Datapoint id 69 collected  
[1:22:11] Charge balance equation is out by 29.9%  
[1:22:11] Stirrer speed set to 60  
[1:22:16] pH 4.94 -> 5.14  
[1:22:16] Using cautious pH adjust  
[1:22:16] Dispensed 0.000047 mL of Base (0.5 M KOH)  
[1:22:22] Stepping pH = 4.95  
[1:22:22] Dispensed 0.000094 mL of Base (0.5 M KOH)  
[1:22:27] Stepping pH = 5.40  
[1:22:42] Stirrer speed set to 0  
[1:22:57] Datapoint id 70 collected  
[1:22:57] Charge balance equation is out by -92.0%  
[1:22:57] Stirrer speed set to 60  
[1:23:02] pH 5.25 -> 5.45  
[1:23:02] Using cautious pH adjust



Sample name: **M12\_octanol**  
Assay name: **pH-metric high logP**  
Assay ID: **18C-03013**  
Filename: **C:\Sirius\_T3\Mehtap\20180302\_exp29\_logP\_T3-2\18C-03013\_M12\_octanol\_pH-metric high logP.t3r**

Experiment start time: **3/3/2018 4:33:34 PM**  
Analyst: **Pion**  
Instrument ID: **T312060**

## Experiment Log (continued)

[1:23:03] Dispensed 0.000024 mL of Base (0.5 M KOH)  
[1:23:08] Stepping pH = 5.23  
[1:23:08] Dispensed 0.000118 mL of Base (0.5 M KOH)  
[1:23:13] Stepping pH = 6.55  
[1:23:28] Stirrer speed set to 0  
[1:24:28] Datapoint id 71 collected  
[1:24:28] Charge balance equation is out by -224.6%  
[1:24:28] Stirrer speed set to 60  
[1:24:33] pH 6.43 -> 6.63  
[1:24:33] Using cautious pH adjust  
[1:24:33] Dispensed 0.000024 mL of Base (0.5 M KOH)  
[1:24:38] Stepping pH = 6.42  
[1:24:38] Dispensed 0.000118 mL of Base (0.5 M KOH)  
[1:24:43] Stepping pH = 7.17  
[1:24:58] Stirrer speed set to 0  
[1:25:59] Datapoint id 72 collected  
[1:25:59] Charge balance equation is out by -216.2%  
[1:25:59] Stirrer speed set to 60  
[1:26:04] pH 7.15 -> 7.35  
[1:26:04] Using cautious pH adjust  
[1:26:04] Dispensed 0.000024 mL of Base (0.5 M KOH)  
[1:26:09] Stepping pH = 7.17  
[1:26:09] Dispensed 0.000024 mL of Base (0.5 M KOH)  
[1:26:14] Stepping pH = 7.23  
[1:26:14] Dispensed 0.000024 mL of Base (0.5 M KOH)  
[1:26:19] Stepping pH = 7.25  
[1:26:19] Dispensed 0.000047 mL of Base (0.5 M KOH)  
[1:26:24] Stepping pH = 7.50  
[1:26:39] Stirrer speed set to 0  
[1:27:39] Datapoint id 73 collected  
[1:27:39] Charge balance equation is out by -583.7%  
[1:27:39] Stirrer speed set to 60  
[1:27:44] pH 7.42 -> 7.62  
[1:27:44] Using cautious pH adjust  
[1:27:44] Dispensed 0.000024 mL of Base (0.5 M KOH)  
[1:27:49] Stepping pH = 7.42  
[1:27:49] Dispensed 0.000024 mL of Base (0.5 M KOH)  
[1:27:55] Stepping pH = 7.46  
[1:27:55] Dispensed 0.000024 mL of Base (0.5 M KOH)  
[1:28:00] Stepping pH = 7.58  
[1:28:00] Dispensed 0.000024 mL of Base (0.5 M KOH)  
[1:28:05] Stepping pH = 7.75  
[1:28:20] Stirrer speed set to 0  
[1:29:20] Datapoint id 74 collected  
[1:29:20] Charge balance equation is out by -640.0%  
[1:29:20] Stirrer speed set to 60  
[1:29:25] pH 7.76 -> 7.96  
[1:29:25] Using cautious pH adjust  
[1:29:25] Dispensed 0.000024 mL of Base (0.5 M KOH)  
[1:29:30] Stepping pH = 7.85  
[1:29:30] Dispensed 0.000024 mL of Base (0.5 M KOH)  
[1:29:35] Stepping pH = 7.93  
[1:29:35] Dispensed 0.000024 mL of Base (0.5 M KOH)  
[1:29:40] Stepping pH = 8.03  
[1:29:56] Stirrer speed set to 0  
[1:30:56] Datapoint id 75 collected  
[1:30:56] Charge balance equation is out by -626.4%  
[1:30:56] Stirrer speed set to 60  
[1:31:01] pH 7.91 -> 8.11

Sample name: **M12\_octanol**  
Assay name: **pH-metric high logP**  
Assay ID: **18C-03013**  
Filename: **C:\Sirius\_T3\Mehtap\20180302\_exp29\_logP\_T3-2\18C-03013\_M12\_octanol\_pH-metric high logP.t3r**

Experiment start time: **3/3/2018 4:33:34 PM**  
Analyst: **Pion**  
Instrument ID: **T312060**

## Experiment Log (continued)

[1:31:01] Using cautious pH adjust  
[1:31:01] Dispensed 0.000024 mL of Base (0.5 M KOH)  
[1:31:06] Stepping pH = 7.96  
[1:31:06] Dispensed 0.000024 mL of Base (0.5 M KOH)  
[1:31:11] Stepping pH = 8.09  
[1:31:11] Dispensed 0.000024 mL of Base (0.5 M KOH)  
[1:31:16] Stepping pH = 8.32  
[1:31:31] Stirrer speed set to 0  
[1:32:31] Datapoint id 76 collected  
[1:32:31] Charge balance equation is out by -645.7%  
[1:32:31] Stirrer speed set to 60  
[1:32:36] pH 8.27 -> 8.47  
[1:32:36] Using cautious pH adjust  
[1:32:36] Dispensed 0.000024 mL of Base (0.5 M KOH)  
[1:32:41] Stepping pH = 8.32  
[1:32:41] Dispensed 0.000024 mL of Base (0.5 M KOH)  
[1:32:47] Stepping pH = 8.46  
[1:32:47] Dispensed 0.000024 mL of Base (0.5 M KOH)  
[1:32:52] Stepping pH = 8.58  
[1:33:07] Stirrer speed set to 0  
[1:33:44] Datapoint id 77 collected  
[1:33:44] Charge balance equation is out by -426.1%  
[1:33:44] Stirrer speed set to 60  
[1:33:49] pH 8.51 -> 8.71  
[1:33:49] Using cautious pH adjust  
[1:33:49] Dispensed 0.000024 mL of Base (0.5 M KOH)  
[1:33:54] Stepping pH = 8.53  
[1:33:54] Dispensed 0.000024 mL of Base (0.5 M KOH)  
[1:33:59] Stepping pH = 8.59  
[1:33:59] Dispensed 0.000024 mL of Base (0.5 M KOH)  
[1:34:04] Stepping pH = 8.72  
[1:34:19] Stirrer speed set to 0  
[1:35:17] Datapoint id 78 collected  
[1:35:17] Charge balance equation is out by -316.1%  
[1:35:17] Stirrer speed set to 60  
[1:35:22] pH 8.65 -> 8.85  
[1:35:22] Using cautious pH adjust  
[1:35:22] Dispensed 0.000024 mL of Base (0.5 M KOH)  
[1:35:27] Stepping pH = 8.63  
[1:35:27] Dispensed 0.000071 mL of Base (0.5 M KOH)  
[1:35:32] Stepping pH = 8.91  
[1:35:48] Stirrer speed set to 0  
[1:36:05] Datapoint id 79 collected  
[1:36:05] Charge balance equation is out by -257.2%  
[1:36:05] Stirrer speed set to 60  
[1:36:10] pH 8.90 -> 9.05  
[1:36:10] Using cautious pH adjust  
[1:36:10] Dispensed 0.000024 mL of Base (0.5 M KOH)  
[1:36:15] Stepping pH = 8.92  
[1:36:15] Dispensed 0.000024 mL of Base (0.5 M KOH)  
[1:36:20] Stepping pH = 8.94  
[1:36:21] Dispensed 0.000094 mL of Base (0.5 M KOH)  
[1:36:26] Stepping pH = 9.14  
[1:36:41] Stirrer speed set to 0  
[1:36:54] Datapoint id 80 collected  
[1:36:54] Charge balance equation is out by -421.1%  
[1:36:54] Argon flow rate set to 0  
[1:36:58] Titrator arm moved over Titration position
