# Supplementary material for: Octanol-water partition coefficient measurements for the SAMPL6 Blind Prediction Challenge
Source: bioRxiv or medRxiv preprint supplement (doi:10.1101/757393), 2019-12-02
Supplement: Supplementary file [file media-2.zip]

Sample name: **M09\_octanol**  
 Assay name: **pH-metric high logP**  
 Assay ID: **18C-06007**  
 Filename: **C:\Sirius\_T3\Mehtap\20180306\_exp30\_logP\_T3-2\18C-06007\_M09\_octanol\_pH-metric high logP.t3r**

Experiment start time: **3/6/2018 3:40:58 PM**  
 Analyst: **Pion**  
 Instrument ID: **T312060**

## pH-metric Result

logP (XH +) 0.91 ±0.07 (n=50)  
 logP (neutral X) 3.05 ±0.02 (n=50)

### 18C-06007 Points 1 to 23

M09\_octanol concentration factor 1.046  
 Carbonate 0.0318 mM  
 Acidity error 0.09711 mM

### 18C-06007 Points 24 to 50

M09\_octanol concentration factor 0.952  
 Carbonate 0.0262 mM  
 Acidity error 0.24086 mM

### 18C-06007 Points 51 to 74

M09\_octanol concentration factor 0.937  
 Carbonate 0.0860 mM  
 Acidity error 0.30528 mM

## Warnings and errors

Errors None  
 Warnings None

## Sample logD and percent species

| pH     | M09_octanol<br>logD | M09_octanol<br>M09_octanolH | M09_octanol<br>M09_octanol | M09_octanol<br>M09_octanolH* | M09_octanol<br>M09_octanol* | Comment    |
|--------|---------------------|-----------------------------|----------------------------|------------------------------|-----------------------------|------------|
| 1.000  | 0.92                | 10.79 %                     | 0.00 %                     | 88.69 %                      | 0.52 %                      | Stomach pH |
| 1.200  | 0.92                | 10.76 %                     | 0.00 %                     | 88.42 %                      | 0.82 %                      |            |
| 2.000  | 0.94                | 10.31 %                     | 0.00 %                     | 84.72 %                      | 4.96 %                      |            |
| 3.000  | 1.11                | 7.13 %                      | 0.03 %                     | 58.56 %                      | 34.29 %                     |            |
| 4.000  | 1.73                | 1.74 %                      | 0.07 %                     | 14.32 %                      | 83.86 %                     |            |
| 5.000  | 2.54                | 0.20 %                      | 0.09 %                     | 1.67 %                       | 98.03 %                     | Blood pH   |
| 6.000  | 2.96                | 0.02 %                      | 0.09 %                     | 0.17 %                       | 99.72 %                     |            |
| 6.500  | 3.02                | 0.01 %                      | 0.09 %                     | 0.05 %                       | 99.85 %                     |            |
| 7.000  | 3.04                | 0.00 %                      | 0.09 %                     | 0.02 %                       | 99.89 %                     |            |
| 7.400  | 3.05                | 0.00 %                      | 0.09 %                     | 0.01 %                       | 99.90 %                     |            |
| 8.000  | 3.05                | 0.00 %                      | 0.09 %                     | 0.00 %                       | 99.91 %                     |            |
| 9.000  | 3.05                | 0.00 %                      | 0.09 %                     | 0.00 %                       | 99.91 %                     |            |
| 10.000 | 3.05                | 0.00 %                      | 0.09 %                     | 0.00 %                       | 99.91 %                     |            |
| 11.000 | 3.05                | 0.00 %                      | 0.09 %                     | 0.00 %                       | 99.91 %                     |            |
| 12.000 | 3.05                | 0.00 %                      | 0.09 %                     | 0.00 %                       | 99.91 %                     |            |

Sample name: **M09\_octanol**  
 Assay name: **pH-metric high logP**  
 Assay ID: **18C-06007**  
 Filename: **C:\Sirius\_T3\Mehtap\20180306\_exp30\_logP\_T3-2\18C-06007\_M09\_octanol\_pH-metric high logP.t3r**

Experiment start time: **3/6/2018 3:40:58 PM**  
 Analyst: **Pion**  
 Instrument ID: **T312060**

## Graphs

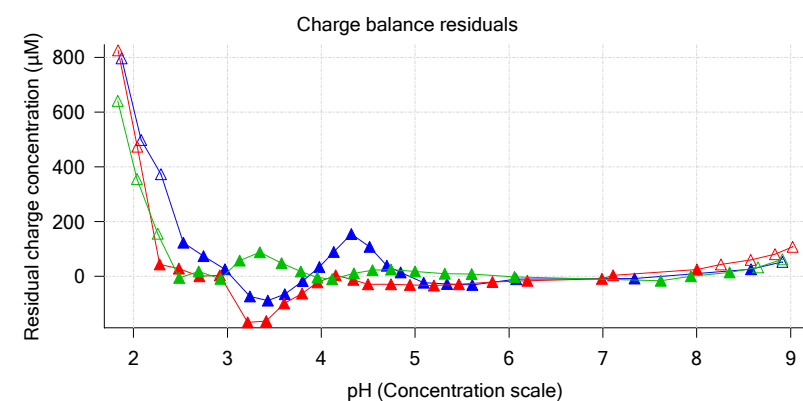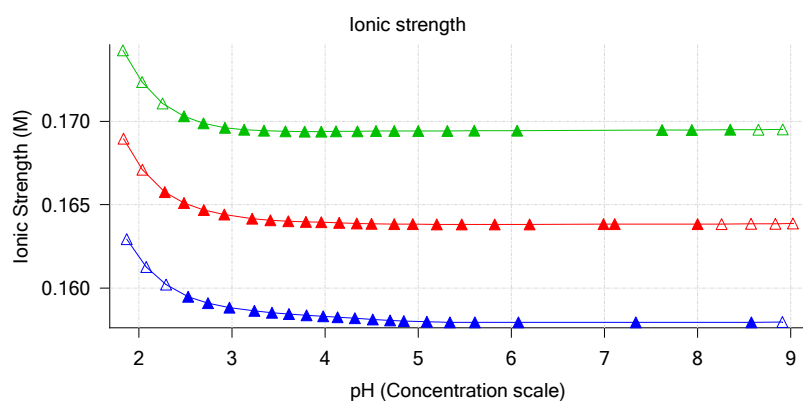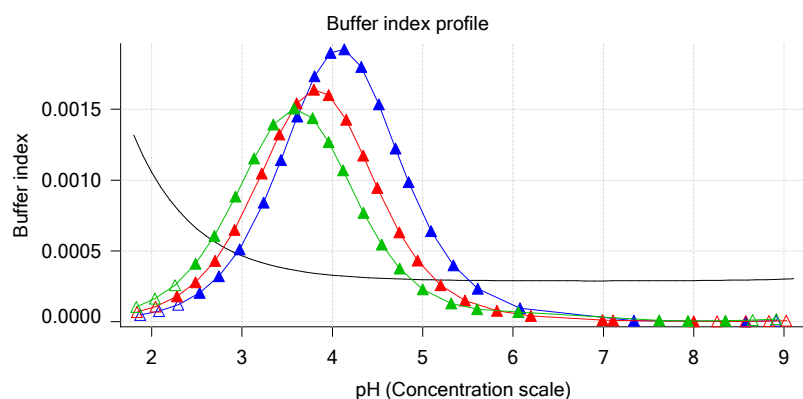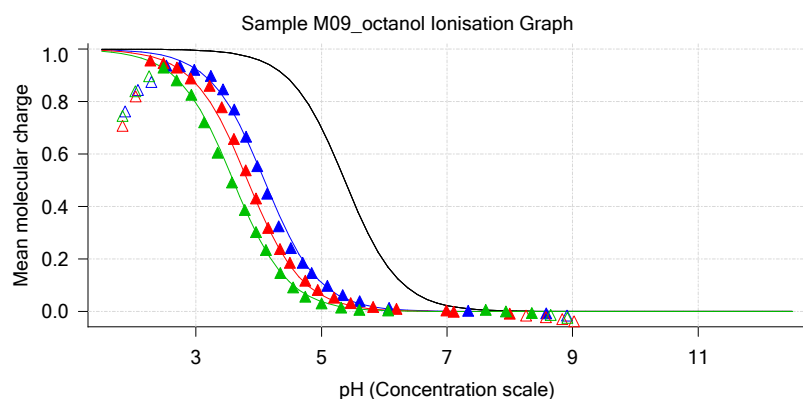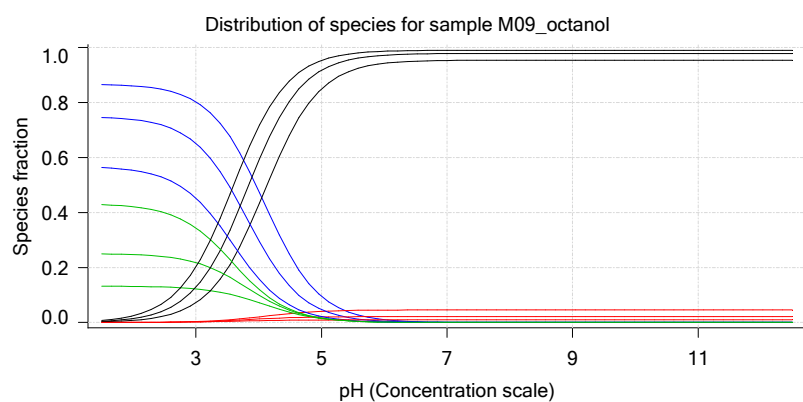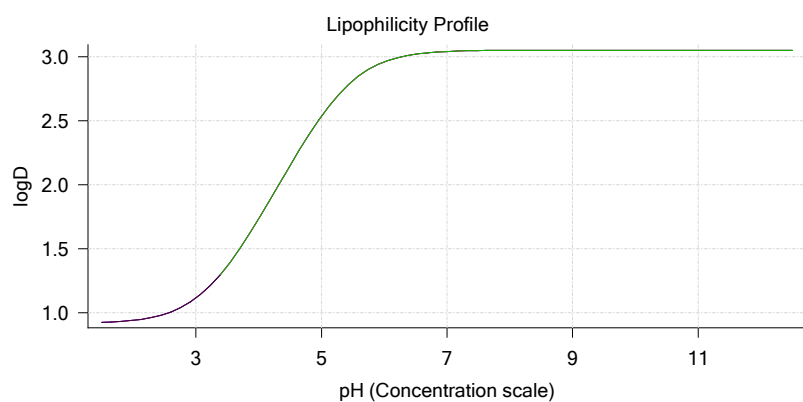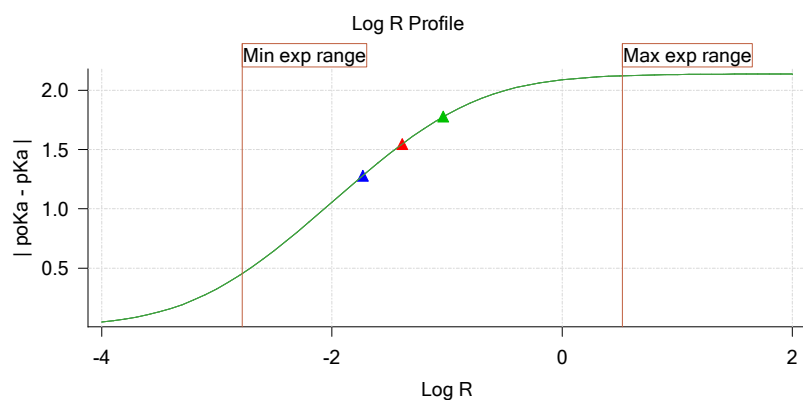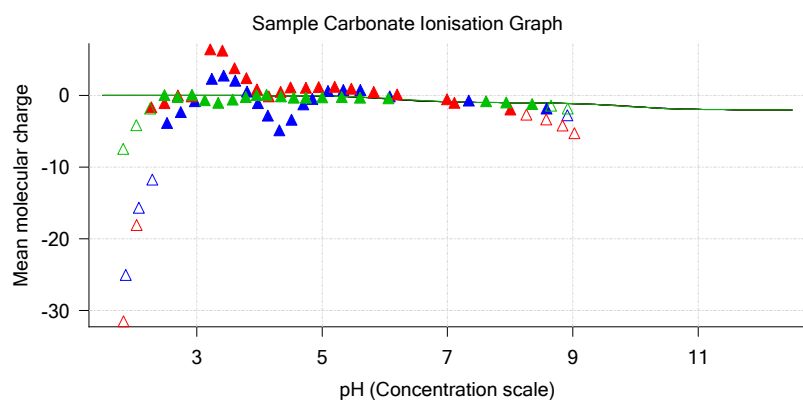

|              |                                                                                                   |                        |                            |
|--------------|---------------------------------------------------------------------------------------------------|------------------------|----------------------------|
| Sample name: | <b>M09_octanol</b>                                                                                | Experiment start time: | <b>3/6/2018 3:40:58 PM</b> |
| Assay name:  | <b>pH-metric high logP</b>                                                                        | Analyst:               | <b>Pion</b>                |
| Assay ID:    | <b>18C-06007</b>                                                                                  | Instrument ID:         | <b>T312060</b>             |
| Filename:    | <b>C:\Sirius_T3\Mehtap\20180306_exp30_logP_T3-2\18C-06007_M09_octanol_pH-metric high logP.t3r</b> |                        |                            |

## Graphs (continued)

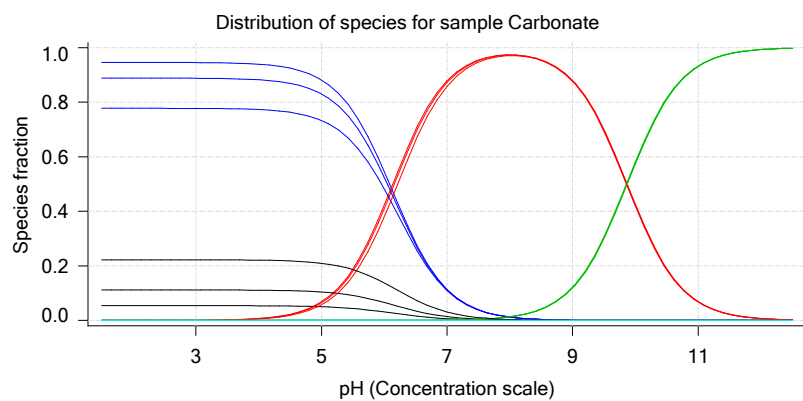

Sample name: **M09\_octanol**  
 Assay name: **pH-metric high logP**  
 Assay ID: **18C-06007**  
 Filename: **C:\Sirius\_T3\Mehtap\20180306\_exp30\_logP\_T3-2\18C-06007\_M09\_octanol\_pH-metric high logP.t3r**

Experiment start time: **3/6/2018 3:40:58 PM**  
 Analyst: **Pion**  
 Instrument ID: **T312060**

## pH-metric high logP Titration 1 of 3 18C-06007 Points 1 to 23

### Overall results

RMSD 0.369  
 Average ionic strength 0.158 M  
 Average temperature 24.9°C  
 Partition ratio 0.0185 : 1  
 Analyte concentration range 3130.9 µM to 3230.2 µM  
 Total points considered 19 of 23

### Warnings and errors

Errors None  
 Warnings None

### Four-Plus parameters

Alpha 0.124 3/6/2018 3:40:58 PM C:\Sirius\_T3\18C-06006\_Blank standardisation.t3r  
 S 0.9973 3/6/2018 3:40:58 PM C:\Sirius\_T3\18C-06006\_Blank standardisation.t3r  
 jH 0.9 3/6/2018 3:40:58 PM C:\Sirius\_T3\18C-06006\_Blank standardisation.t3r  
 jOH -0.7 3/6/2018 3:40:58 PM C:\Sirius\_T3\18C-06006\_Blank standardisation.t3r

### Titrants

0.50 M HCl 0.989131 3/6/2018 3:40:58 PM C:\Sirius\_T3\18C-06006\_Blank standardisation.t3r  
 0.50 M KOH 0.999845 3/6/2018 3:40:58 PM C:\Sirius\_T3\KOH18B27.t3r

### Sample

M09\_octanol concentration factor 1.046  
 M09\_octanol stoichiometry 1.000  
 Chloride stoichiometry 1.000  
 Base pKa 1 5.37  
 logP (XH +) 0.75  
 logP (neutral X) 3.05

### Sample graphs

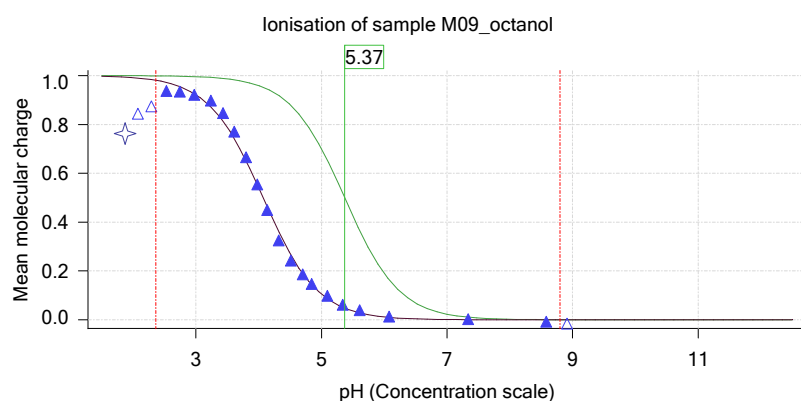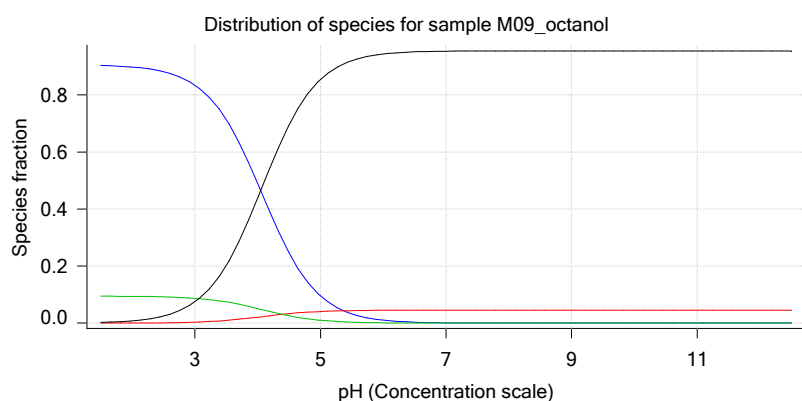

Sample name: **M09\_octanol**  
 Assay name: **pH-metric high logP**  
 Assay ID: **18C-06007**  
 Filename: **C:\Sirius\_T3\Mehtap\20180306\_exp30\_logP\_T3-2\18C-06007\_M09\_octanol\_pH-metric high logP.t3r**

Experiment start time: **3/6/2018 3:40:58 PM**  
 Analyst: **Pion**  
 Instrument ID: **T312060**

## Sample graphs (continued)

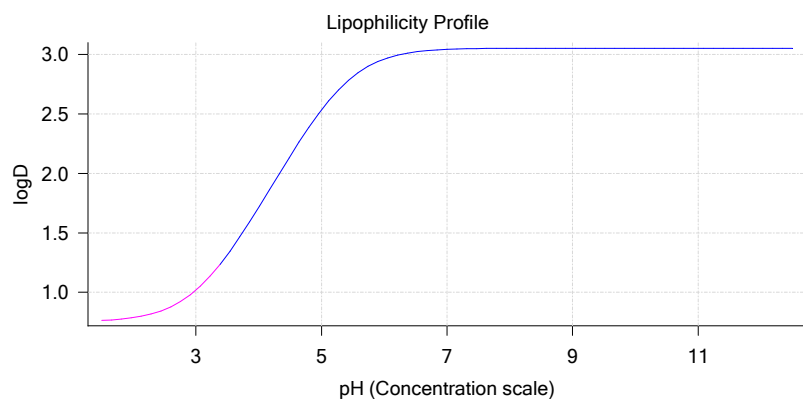

## Sample logD and percent species

| pH     | M09_octanol<br>logD | M09_octanol<br>M09_octanolH | M09_octanol<br>M09_octanolH | M09_octanol<br>M09_octanolH* | M09_octanol<br>M09_octanol* | Comment    |
|--------|---------------------|-----------------------------|-----------------------------|------------------------------|-----------------------------|------------|
| 1.000  | 0.75                | 90.46 %                     | 0.00 %                      | 9.46 %                       | 0.08 %                      | Stomach pH |
| 1.200  | 0.76                | 90.41 %                     | 0.01 %                      | 9.45 %                       | 0.13 %                      |            |
| 2.000  | 0.79                | 89.77 %                     | 0.04 %                      | 9.39 %                       | 0.80 %                      |            |
| 3.000  | 1.02                | 83.46 %                     | 0.36 %                      | 8.72 %                       | 7.46 %                      |            |
| 4.000  | 1.71                | 48.98 %                     | 2.09 %                      | 5.12 %                       | 43.81 %                     |            |
| 5.000  | 2.53                | 9.55 %                      | 4.07 %                      | 1.00 %                       | 85.38 %                     | Blood pH   |
| 6.000  | 2.96                | 1.05 %                      | 4.50 %                      | 0.11 %                       | 94.34 %                     |            |
| 6.500  | 3.02                | 0.34 %                      | 4.54 %                      | 0.04 %                       | 95.09 %                     |            |
| 7.000  | 3.04                | 0.11 %                      | 4.55 %                      | 0.01 %                       | 95.34 %                     |            |
| 7.400  | 3.05                | 0.04 %                      | 4.55 %                      | 0.00 %                       | 95.40 %                     |            |
| 8.000  | 3.05                | 0.01 %                      | 4.55 %                      | 0.00 %                       | 95.44 %                     |            |
| 9.000  | 3.05                | 0.00 %                      | 4.55 %                      | 0.00 %                       | 95.45 %                     |            |
| 10.000 | 3.05                | 0.00 %                      | 4.55 %                      | 0.00 %                       | 95.45 %                     |            |
| 11.000 | 3.05                | 0.00 %                      | 4.55 %                      | 0.00 %                       | 95.45 %                     |            |
| 12.000 | 3.05                | 0.00 %                      | 4.55 %                      | 0.00 %                       | 95.45 %                     |            |

## Carbonate and acidity

 Carbonate 0.032 mM  
 Acidity error 0.097 mM

## Other graphs

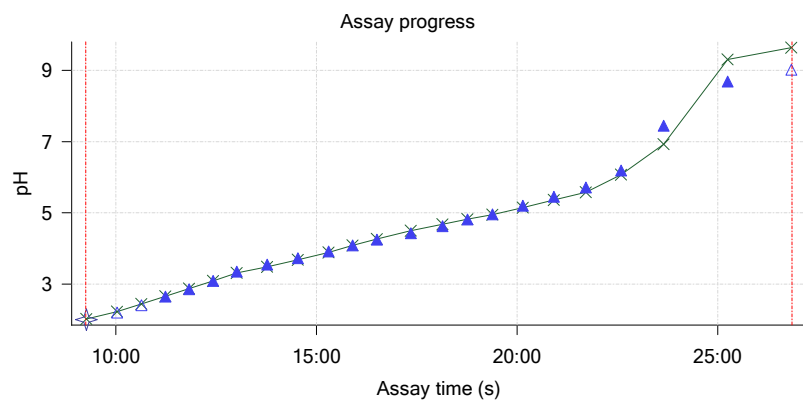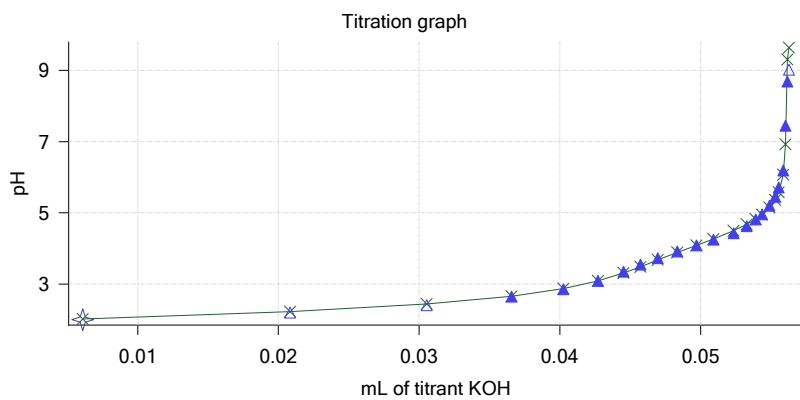

Sample name: **M09\_octanol**  
 Assay name: **pH-metric high logP**  
 Assay ID: **18C-06007**  
 Filename: **C:\Sirius\_T3\Mehtap\20180306\_exp30\_logP\_T3-2\18C-06007\_M09\_octanol\_pH-metric high logP.t3r**

Experiment start time: **3/6/2018 3:40:58 PM**  
 Analyst: **Pion**  
 Instrument ID: **T312060**

## Other graphs (continued)

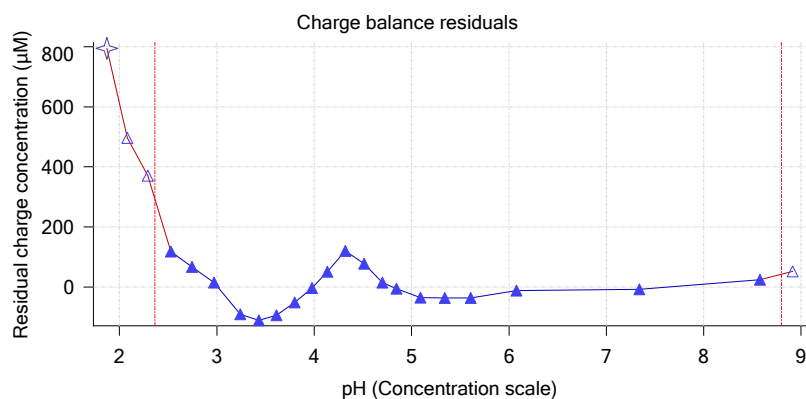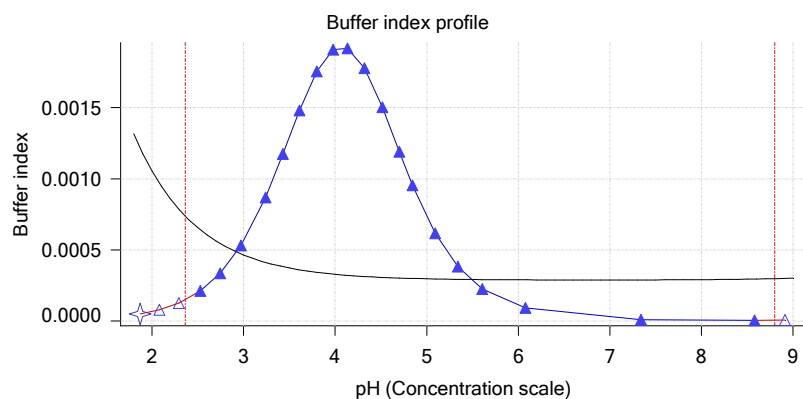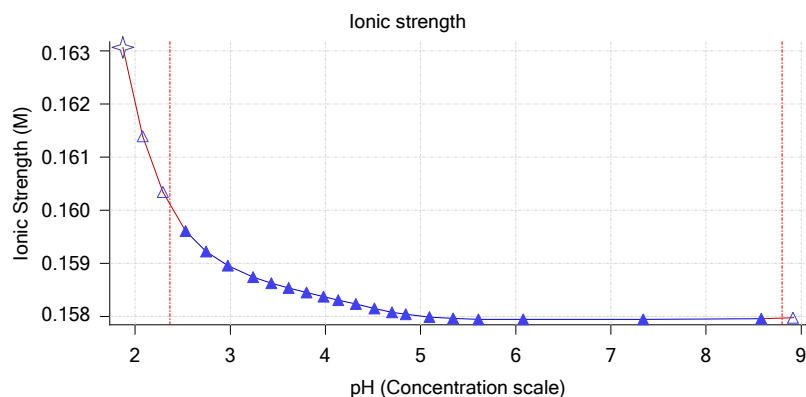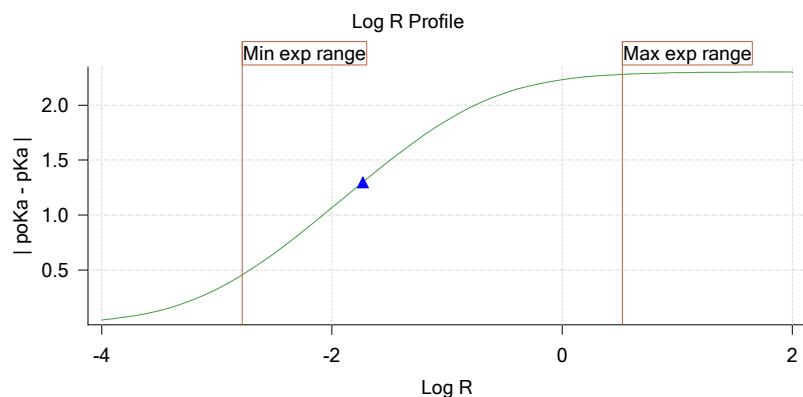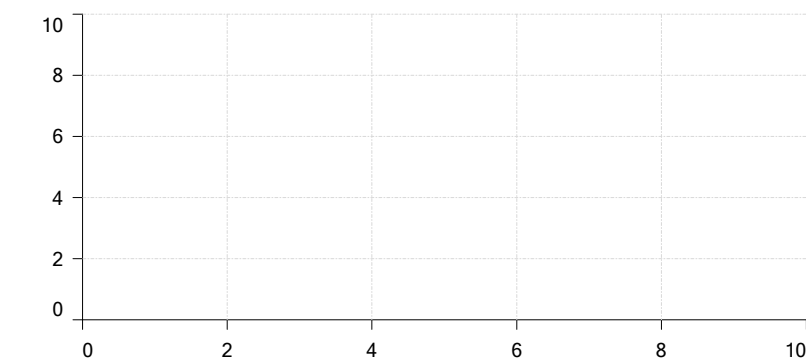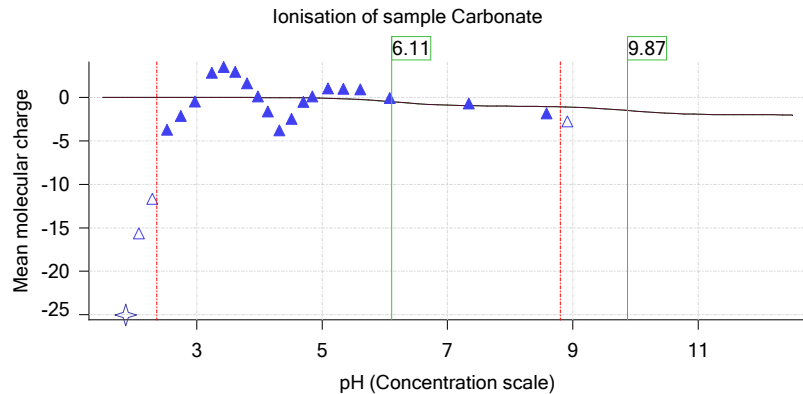

Sample name: **M09\_octanol**  
 Assay name: **pH-metric high logP**  
 Assay ID: **18C-06007**  
 Filename: **C:\Sirius\_T3\Mehtap\20180306\_exp30\_logP\_T3-2\18C-06007\_M09\_octanol\_pH-metric high logP.t3r**

Experiment start time: **3/6/2018 3:40:58 PM**  
 Analyst: **Pion**  
 Instrument ID: **T312060**

pH-metric high logP Titration 2 of 3 18C-06007 Points 24 to 50

## Overall results

RMSD 0.910  
 Average ionic strength 0.164 M  
 Average temperature 25.0°C  
 Partition ratio 0.0407 : 1  
 Analyte concentration range 2862.7 µM to 2955.4 µM  
 Total points considered 21 of 27

## Warnings and errors

Errors None  
 Warnings None

## Four-Plus parameters

Alpha 0.124 3/6/2018 3:40:58 PM C:\Sirius\_T3\18C-06006\_Blank standardisation.t3r  
 S 0.9973 3/6/2018 3:40:58 PM C:\Sirius\_T3\18C-06006\_Blank standardisation.t3r  
 jH 0.9 3/6/2018 3:40:58 PM C:\Sirius\_T3\18C-06006\_Blank standardisation.t3r  
 jOH -0.7 3/6/2018 3:40:58 PM C:\Sirius\_T3\18C-06006\_Blank standardisation.t3r

## Titrants

0.50 M HCl 0.989131 3/6/2018 3:40:58 PM C:\Sirius\_T3\18C-06006\_Blank standardisation.t3r  
 0.50 M KOH 0.999845 3/6/2018 3:40:58 PM C:\Sirius\_T3\KOH18B27.t3r

## Sample

M09\_octanol concentration factor 0.952  
 M09\_octanol stoichiometry 1.000  
 Chloride stoichiometry 1.000  
 Base pKa 1 5.37  
 logP (XH +) 0.76  
 logP (neutral X) 2.97

## Sample graphs

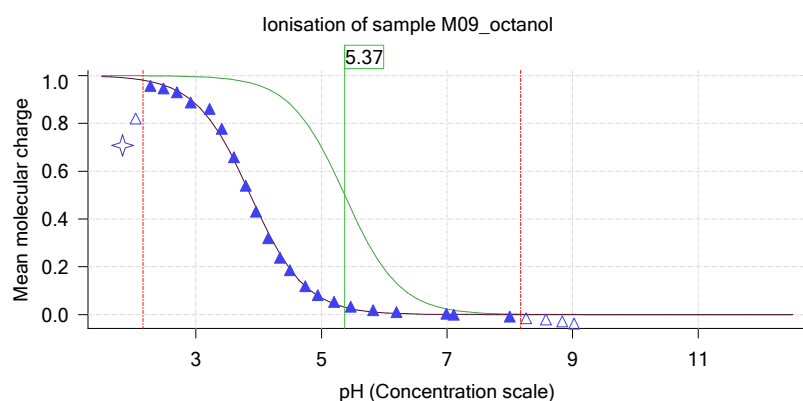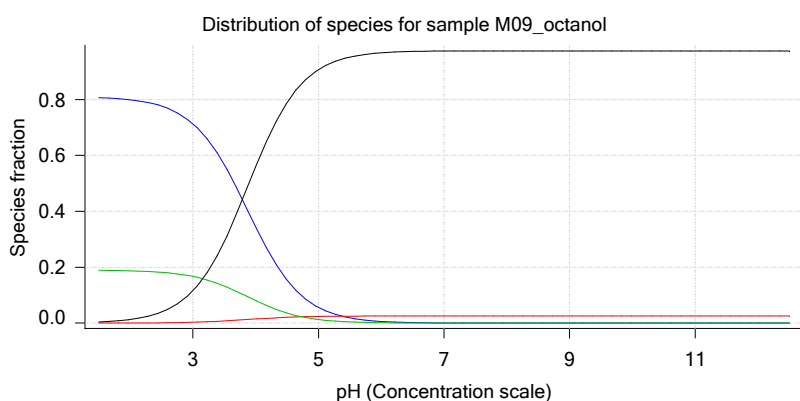

Sample name: **M09\_octanol**  
Assay name: **pH-metric high logP**  
Assay ID: **18C-06007**  
Filename: **C:\Sirius\_T3\Mehtap\20180306\_exp30\_logP\_T3-2\18C-06007\_M09\_octanol\_pH-metric high logP.t3r**

Experiment start time: **3/6/2018 3:40:58 PM**  
Analyst: **Pion**  
Instrument ID: **T312060**

## Sample graphs (continued)

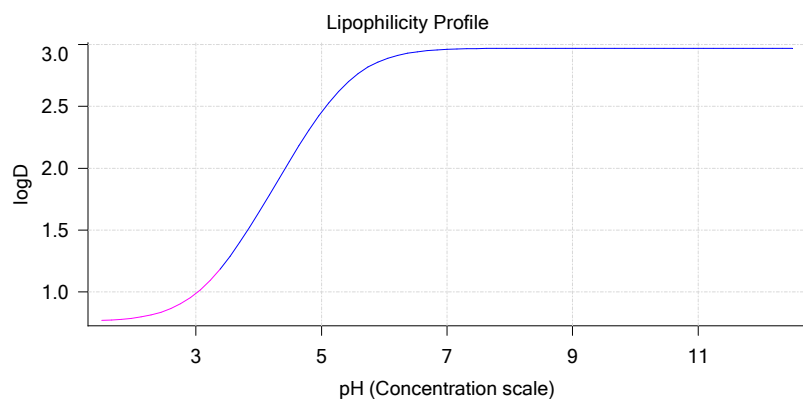

## Sample logD and percent species

| pH     | M09_octanol<br>logD | M09_octanol<br>M09_octanolH | M09_octanol<br>M09_octanolH | M09_octanol<br>M09_octanolH* | M09_octanol<br>M09_octanol* | Comment    |
|--------|---------------------|-----------------------------|-----------------------------|------------------------------|-----------------------------|------------|
| 1.000  | 0.76                | 80.91 %                     | 0.00 %                      | 18.96 %                      | 0.13 %                      | Stomach pH |
| 1.200  | 0.76                | 80.84 %                     | 0.01 %                      | 18.94 %                      | 0.21 %                      |            |
| 2.000  | 0.79                | 79.94 %                     | 0.03 %                      | 18.73 %                      | 1.30 %                      |            |
| 3.000  | 0.99                | 71.38 %                     | 0.30 %                      | 16.73 %                      | 11.59 %                     |            |
| 4.000  | 1.64                | 34.48 %                     | 1.47 %                      | 8.08 %                       | 55.97 %                     |            |
| 5.000  | 2.45                | 5.59 %                      | 2.38 %                      | 1.31 %                       | 90.72 %                     | Blood pH   |
| 6.000  | 2.88                | 0.60 %                      | 2.54 %                      | 0.14 %                       | 96.72 %                     |            |
| 6.500  | 2.94                | 0.19 %                      | 2.55 %                      | 0.04 %                       | 97.21 %                     |            |
| 7.000  | 2.96                | 0.06 %                      | 2.56 %                      | 0.01 %                       | 97.37 %                     |            |
| 7.400  | 2.97                | 0.02 %                      | 2.56 %                      | 0.01 %                       | 97.41 %                     |            |
| 8.000  | 2.97                | 0.01 %                      | 2.56 %                      | 0.00 %                       | 97.43 %                     |            |
| 9.000  | 2.97                | 0.00 %                      | 2.56 %                      | 0.00 %                       | 97.44 %                     |            |
| 10.000 | 2.97                | 0.00 %                      | 2.56 %                      | 0.00 %                       | 97.44 %                     |            |
| 11.000 | 2.97                | 0.00 %                      | 2.56 %                      | 0.00 %                       | 97.44 %                     |            |
| 12.000 | 2.97                | 0.00 %                      | 2.56 %                      | 0.00 %                       | 97.44 %                     |            |

## Carbonate and acidity

Carbonate 0.026 mM  
Acidity error 0.241 mM

## Other graphs

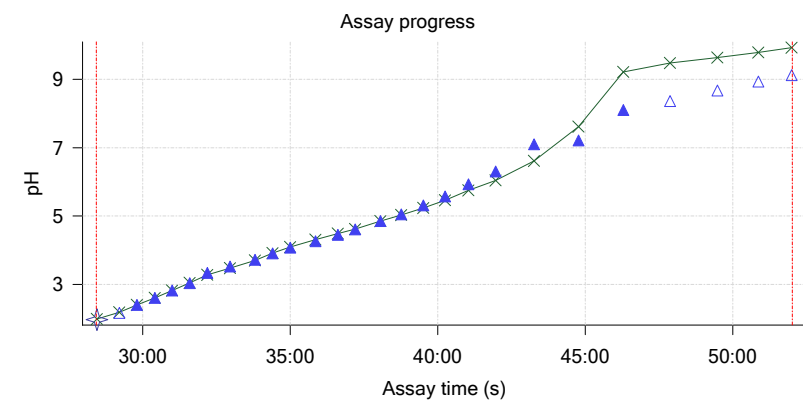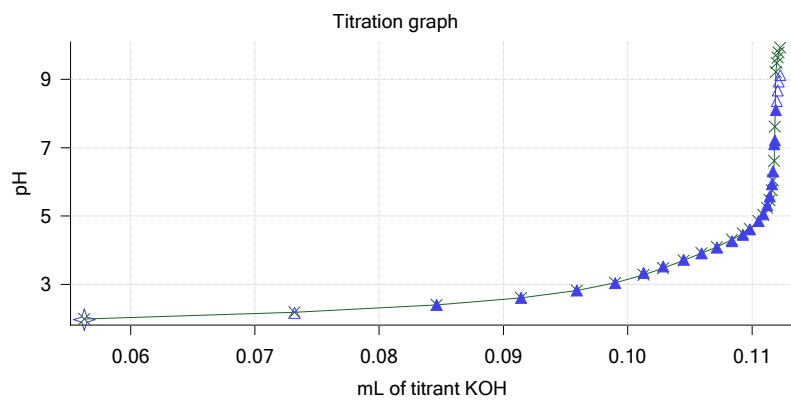



Sample name: **M09\_octanol**  
 Assay name: **pH-metric high logP**  
 Assay ID: **18C-06007**  
 Filename: **C:\Sirius\_T3\Mehtap\20180306\_exp30\_logP\_T3-2\18C-06007\_M09\_octanol\_pH-metric high logP.t3r**

Experiment start time: **3/6/2018 3:40:58 PM**  
 Analyst: **Pion**  
 Instrument ID: **T312060**

## Other graphs (continued)

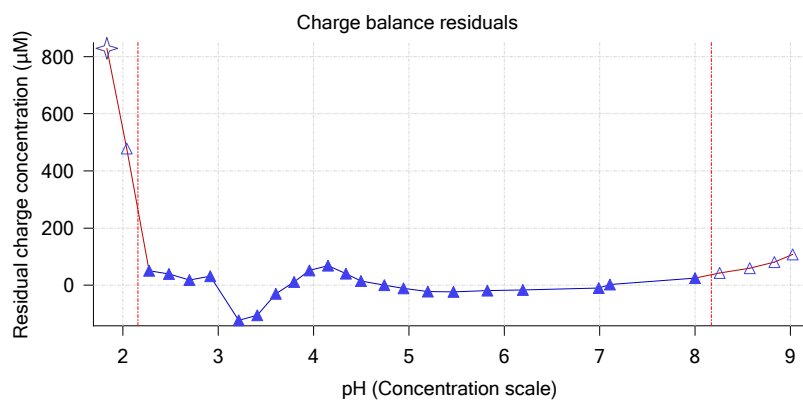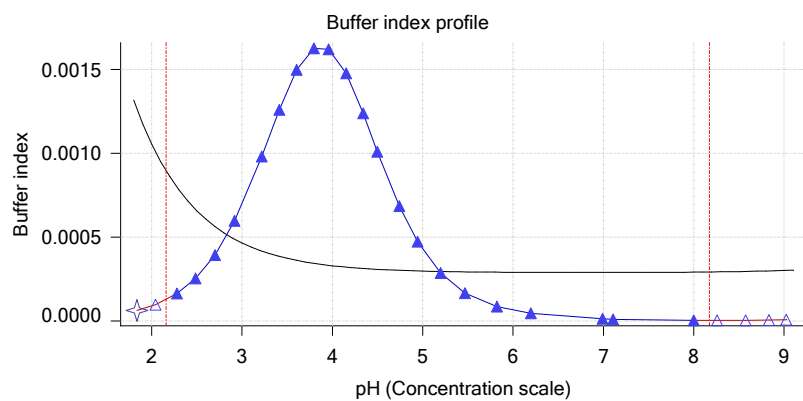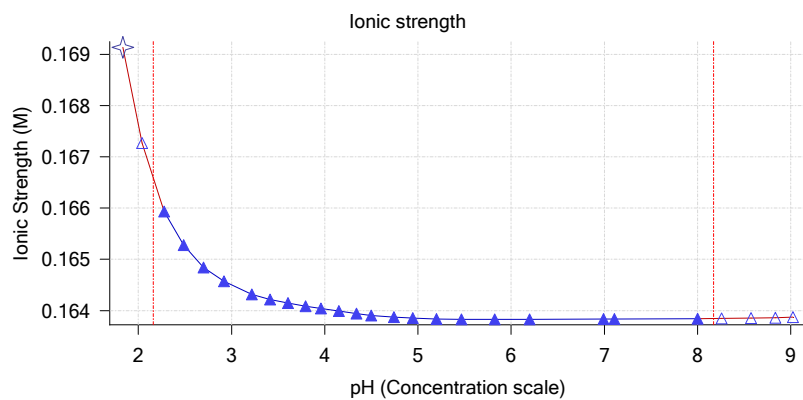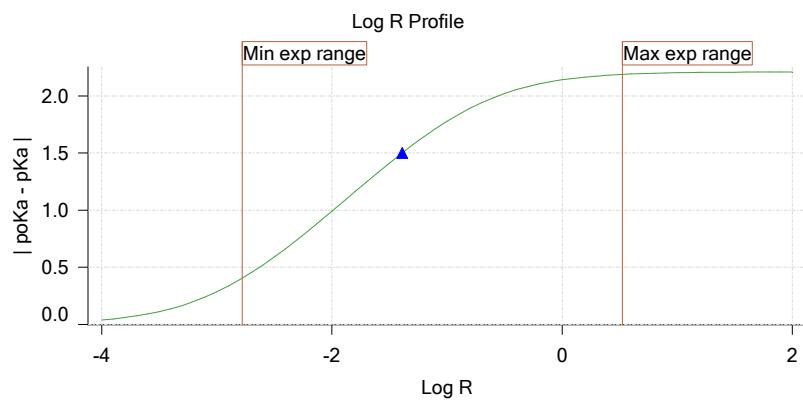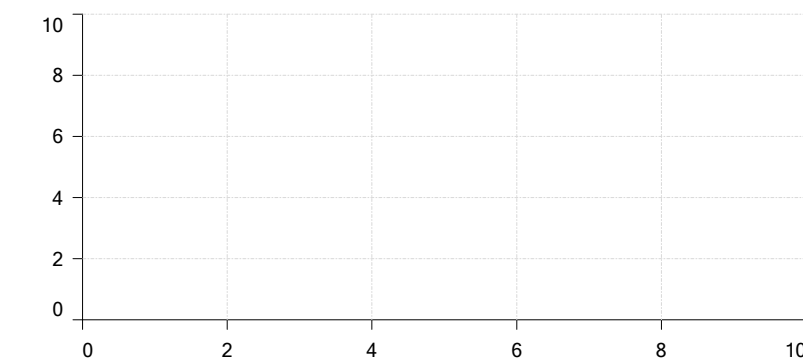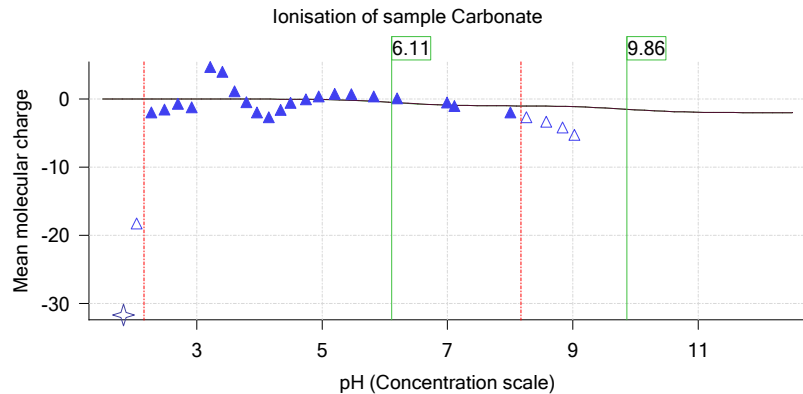

Sample name: **M09\_octanol**  
 Assay name: **pH-metric high logP**  
 Assay ID: **18C-06007**  
 Filename: **C:\Sirius\_T3\Mehtap\20180306\_exp30\_logP\_T3-2\18C-06007\_M09\_octanol\_pH-metric high logP.t3r**

Experiment start time: **3/6/2018 3:40:58 PM**  
 Analyst: **Pion**  
 Instrument ID: **T312060**

## pH-metric high logP Titration 3 of 3 18C-06007 Points 51 to 74

### Overall results

RMSD 0.405  
 Average ionic strength 0.170 M  
 Average temperature 25.0°C  
 Partition ratio 0.0926 : 1  
 Analyte concentration range 2547.3 µM to 2626.2 µM  
 Total points considered 19 of 24

### Warnings and errors

Errors None  
 Warnings None

### Four-Plus parameters

Alpha 0.124 3/6/2018 3:40:58 PM C:\Sirius\_T3\18C-06006\_Blank standardisation.t3r  
 S 0.9973 3/6/2018 3:40:58 PM C:\Sirius\_T3\18C-06006\_Blank standardisation.t3r  
 jH 0.9 3/6/2018 3:40:58 PM C:\Sirius\_T3\18C-06006\_Blank standardisation.t3r  
 jOH -0.7 3/6/2018 3:40:58 PM C:\Sirius\_T3\18C-06006\_Blank standardisation.t3r

### Titrants

0.50 M HCl 0.989131 3/6/2018 3:40:58 PM C:\Sirius\_T3\18C-06006\_Blank standardisation.t3r  
 0.50 M KOH 0.999845 3/6/2018 3:40:58 PM C:\Sirius\_T3\KOH18B27.t3r

### Sample

M09\_octanol concentration factor 0.937  
 M09\_octanol stoichiometry 1.000  
 Chloride stoichiometry 1.000  
 Base pKa 1 5.37  
 logP (XH +) 0.76  
 logP (neutral X) 3.01

### Sample graphs

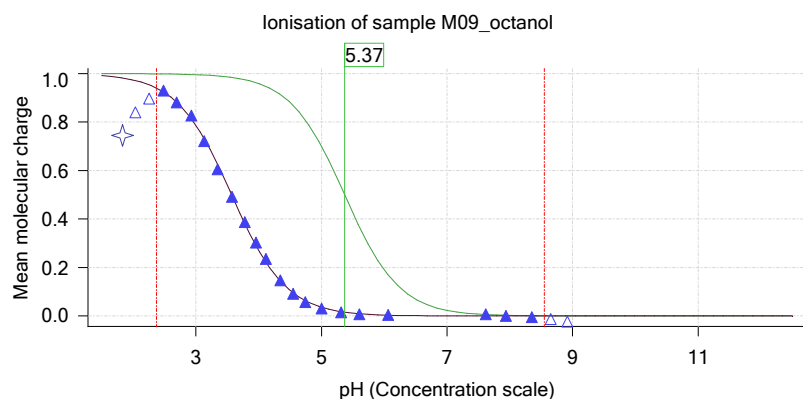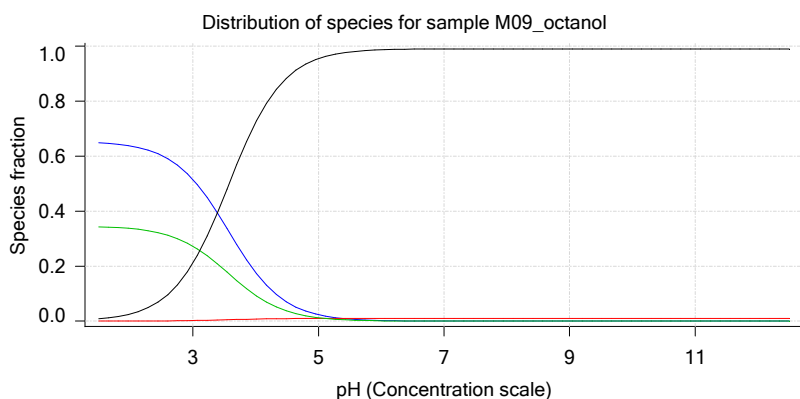

Sample name: **M09\_octanol**  
 Assay name: **pH-metric high logP**  
 Assay ID: **18C-06007**  
 Filename: **C:\Sirius\_T3\Mehtap\20180306\_exp30\_logP\_T3-2\18C-06007\_M09\_octanol\_pH-metric high logP.t3r**

Experiment start time: **3/6/2018 3:40:58 PM**  
 Analyst: **Pion**  
 Instrument ID: **T312060**

## Sample graphs (continued)

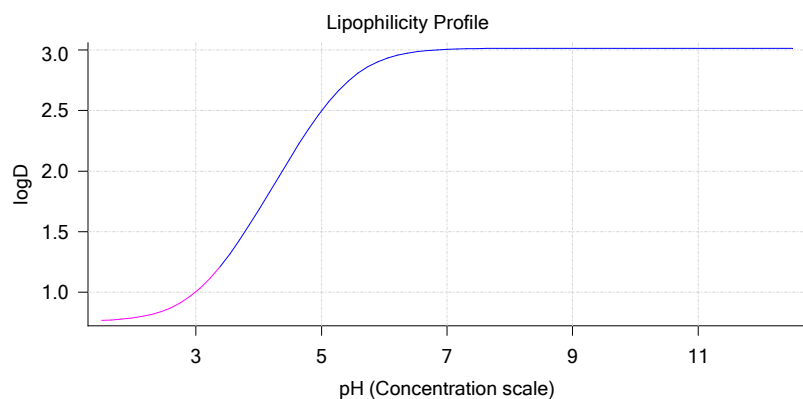

## Sample logD and percent species

| pH     | M09_octanol<br>logD | M09_octanol<br>M09_octanolH | M09_octanol<br>M09_octanolH | M09_octanol<br>M09_octanolH* | M09_octanol<br>M09_octanol* | Comment |
|--------|---------------------|-----------------------------|-----------------------------|------------------------------|-----------------------------|---------|
| 1.000  | 0.76                | 65.23 %                     | 0.00 %                      | 34.50 %                      | 0.27 %                      |         |
| 1.200  | 0.76                | 65.13 %                     | 0.00 %                      | 34.45 %                      | 0.42 %                      |         |
| 2.000  | 0.79                | 63.69 %                     | 0.03 %                      | 33.69 %                      | 2.60 %                      |         |
| 3.000  | 1.00                | 51.51 %                     | 0.22 %                      | 27.25 %                      | 21.02 %                     |         |
| 4.000  | 1.68                | 17.69 %                     | 0.75 %                      | 9.36 %                       | 72.19 %                     |         |
| 5.000  | 2.50                | 2.34 %                      | 1.00 %                      | 1.24 %                       | 95.43 %                     |         |
| 6.000  | 2.92                | 0.24 %                      | 1.03 %                      | 0.13 %                       | 98.60 %                     |         |
| 6.500  | 2.98                | 0.08 %                      | 1.03 %                      | 0.04 %                       | 98.85 %                     |         |
| 7.000  | 3.00                | 0.02 %                      | 1.03 %                      | 0.01 %                       | 98.93 %                     |         |
| 7.400  | 3.01                | 0.01 %                      | 1.03 %                      | 0.01 %                       | 98.95 %                     |         |
| 8.000  | 3.01                | 0.00 %                      | 1.03 %                      | 0.00 %                       | 98.96 %                     |         |
| 9.000  | 3.01                | 0.00 %                      | 1.03 %                      | 0.00 %                       | 98.97 %                     |         |
| 10.000 | 3.01                | 0.00 %                      | 1.03 %                      | 0.00 %                       | 98.97 %                     |         |
| 11.000 | 3.01                | 0.00 %                      | 1.03 %                      | 0.00 %                       | 98.97 %                     |         |
| 12.000 | 3.01                | 0.00 %                      | 1.03 %                      | 0.00 %                       | 98.97 %                     |         |

## Carbonate and acidity

Carbonate 0.086 mM  
 Acidity error 0.305 mM

## Other graphs

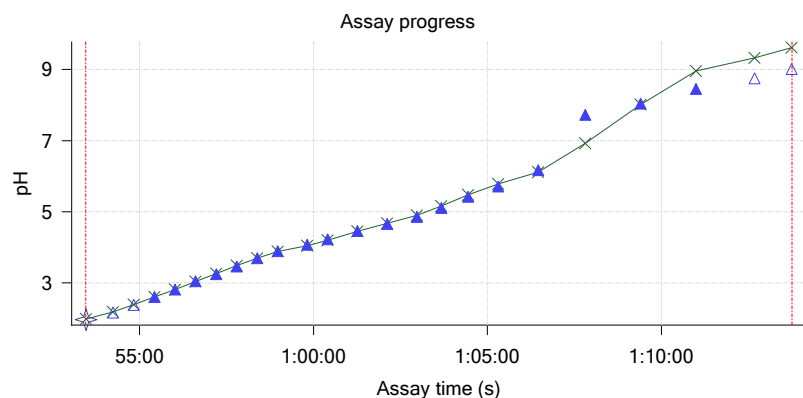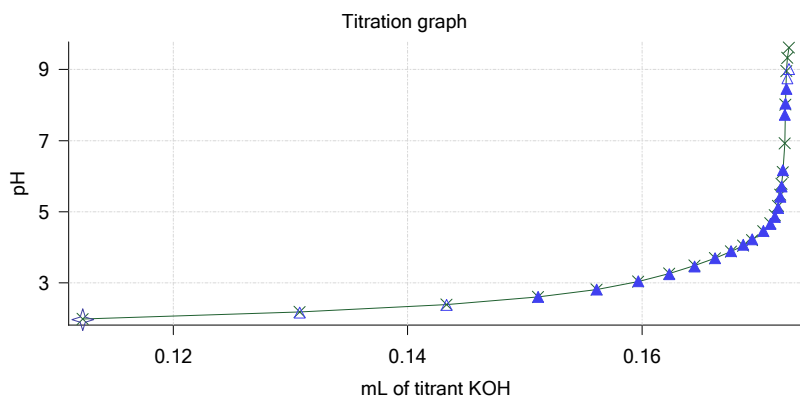

Sample name: **M09\_octanol**  
 Assay name: **pH-metric high logP**  
 Assay ID: **18C-06007**  
 Filename: **C:\Sirius\_T3\Mehtap\20180306\_exp30\_logP\_T3-2\18C-06007\_M09\_octanol\_pH-metric high logP.t3r**

Experiment start time: **3/6/2018 3:40:58 PM**  
 Analyst: **Pion**  
 Instrument ID: **T312060**

## Other graphs (continued)

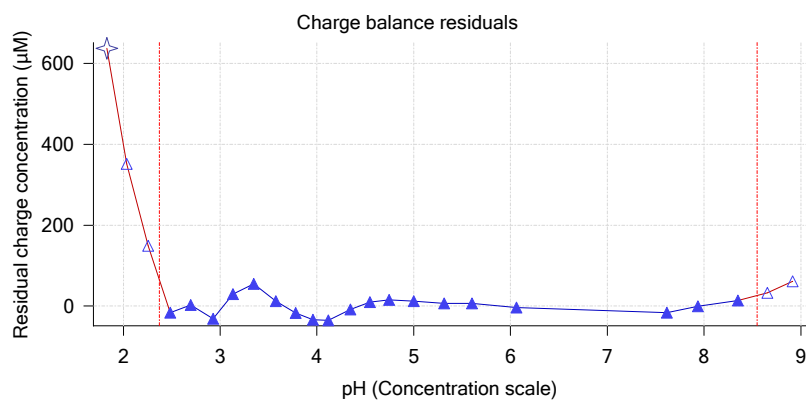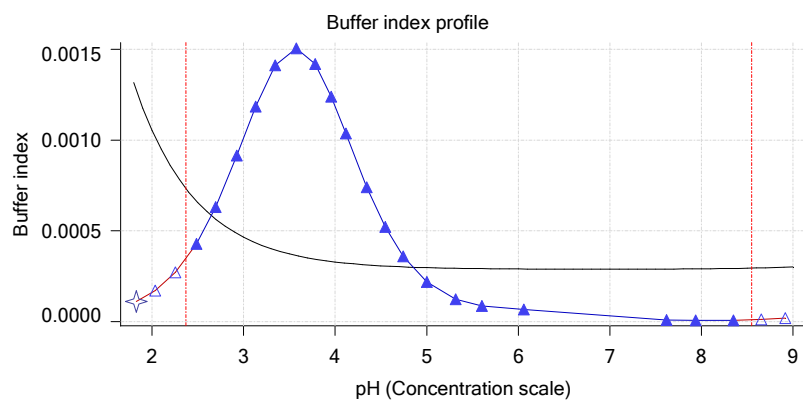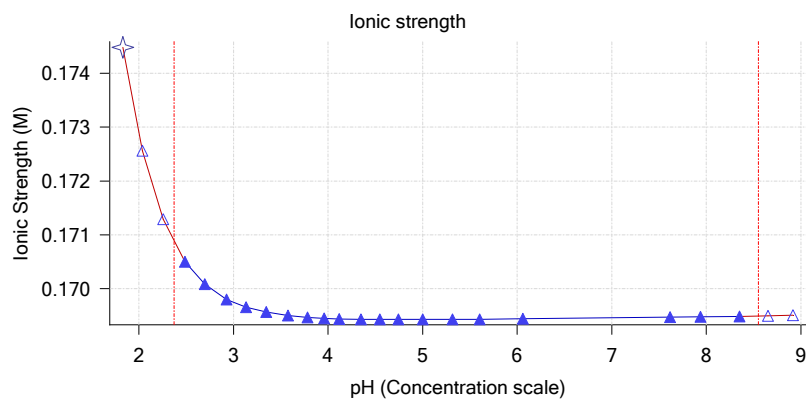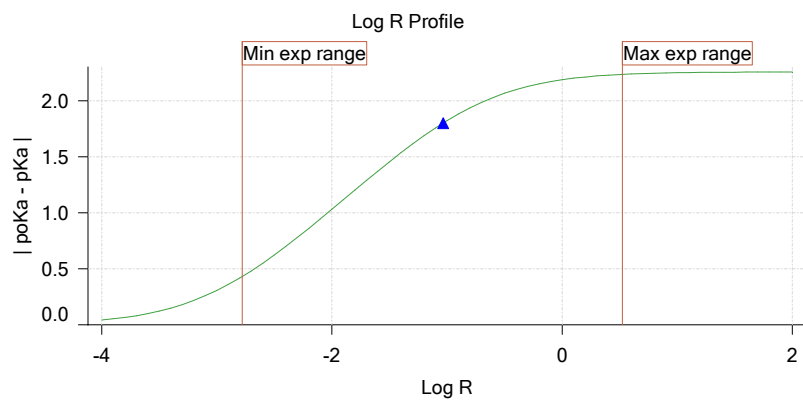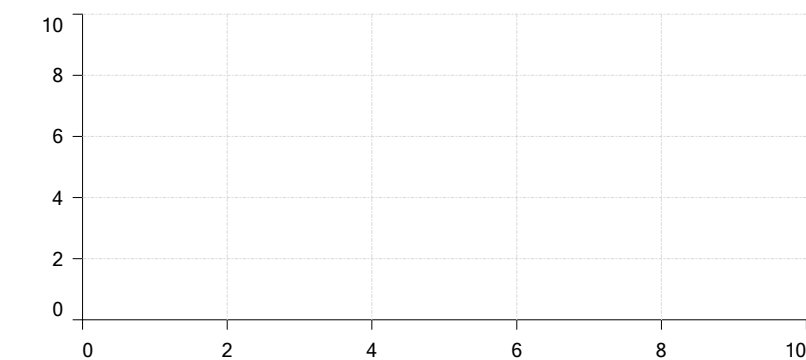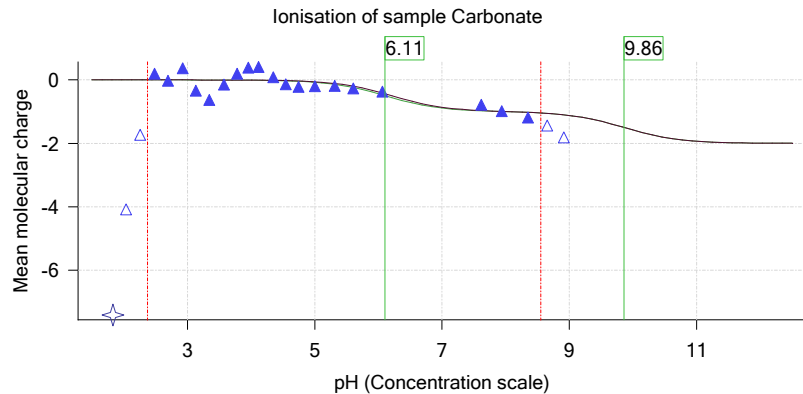

Sample name: **M09\_octanol**  
 Assay name: **pH-metric high logP**  
 Assay ID: **18C-06007**  
 Filename: **C:\Sirius\_T3\Mehtap\20180306\_exp30\_logP\_T3-2\18C-06007\_M09\_octanol\_pH-metric high logP.t3r**

Experiment start time: **3/6/2018 3:40:58 PM**  
 Analyst: **Pion**  
 Instrument ID: **T312060**

## Assay Model

| Settings                          | Value        | Date/Time changed    | Imported from           |
|-----------------------------------|--------------|----------------------|-------------------------|
| Sample name                       | M09_octanol  | 2/27/2018 4:56:17 PM | User entered value      |
| Sample by                         | Weight       |                      | Default value           |
| Sample weight                     | 0.001470 g   | 3/6/2018 3:39:12 PM  | User entered value      |
| Formula weight                    | 287.74 g/mol | 2/27/2018 4:45:45 PM | User entered value      |
| Solubility                        | Unknown      |                      | Default value           |
| Molecular weight                  | 251.28       | 2/27/2018 4:45:45 PM | User entered value      |
| Individual pKa ionic environments | No           |                      | Default value           |
| Number of pKas                    | 1            | 2/27/2018 4:45:45 PM | User entered value      |
| Sample is a                       | Base         | 2/27/2018 4:45:45 PM | User entered value      |
| pKa 1                             | 5.37         | 2/27/2018 4:45:45 PM | User entered value      |
| logp (XH +)                       | 0.76         | 3/2/2018 3:27:23 PM  | User entered value      |
| logP (neutral X)                  | 3.27         | 3/2/2018 3:27:17 PM  | User entered value      |
| Stoichiometry                     | 1.00000      |                      | Default value           |
| Aprotic counterion name           | Chloride     |                      | From standards.xml file |
| Stoichiometry                     | 1.00         |                      | From standards.xml file |
| Charge per counterion             | -1           |                      | From standards.xml file |

## Events

| Time    | Event             | Water      | Acid       | Base       | Octanol    | pH    | dpH/dt   | pH R-squared | pH SD   | dpH/dt time         |
|---------|-------------------|------------|------------|------------|------------|-------|----------|--------------|---------|---------------------|
| 6:16.5  | Initial pH = 3.92 |            |            |            |            |       |          |              |         |                     |
| 9:16.0  | Data point 1      | 1.50000 mL | 0.04544 mL | 0.00609 mL | 0.03001 mL | 2.003 | -0.00765 | 0.85441      | 0.00041 | 10.0 s              |
| 10:02.2 | Data point 2      | 1.50000 mL | 0.04544 mL | 0.02084 mL | 0.03001 mL | 2.206 | -0.00581 | 0.82838      | 0.00032 | 10.5 s              |
| 10:38.4 | Data point 3      | 1.50000 mL | 0.04544 mL | 0.03053 mL | 0.03001 mL | 2.415 | -0.00308 | 0.68547      | 0.00018 | 10.5 s              |
| 11:14.3 | Data point 4      | 1.50000 mL | 0.04544 mL | 0.03657 mL | 0.03001 mL | 2.649 | -0.00951 | 0.26483      | 0.00091 | 10.0 s              |
| 11:49.8 | Data point 5      | 1.50000 mL | 0.04544 mL | 0.04024 mL | 0.03001 mL | 2.863 | -0.01634 | 0.89001      | 0.00086 | 10.0 s              |
| 12:25.3 | Data point 6      | 1.50000 mL | 0.04544 mL | 0.04271 mL | 0.03001 mL | 3.089 | -0.00759 | 0.82120      | 0.00041 | 10.0 s              |
| 13:00.8 | Data point 7      | 1.50000 mL | 0.04544 mL | 0.04452 mL | 0.03001 mL | 3.357 | -0.00824 | 0.86493      | 0.00044 | 10.0 s              |
| 13:46.4 | Data point 8      | 1.50000 mL | 0.04544 mL | 0.04572 mL | 0.03001 mL | 3.546 | -0.00997 | 0.85301      | 0.00053 | 10.0 s              |
| 14:32.2 | Data point 9      | 1.50000 mL | 0.04544 mL | 0.04694 mL | 0.03001 mL | 3.727 | -0.00887 | 0.87089      | 0.00047 | 10.5 s              |
| 15:18.4 | Data point 10     | 1.50000 mL | 0.04544 mL | 0.04833 mL | 0.03001 mL | 3.916 | -0.01261 | 0.86654      | 0.00067 | 10.0 s              |
| 15:54.0 | Data point 11     | 1.50000 mL | 0.04544 mL | 0.04969 mL | 0.03001 mL | 4.093 | -0.01852 | 0.93335      | 0.00095 | 11.0 s              |
| 16:30.4 | Data point 12     | 1.50000 mL | 0.04544 mL | 0.05092 mL | 0.03001 mL | 4.247 | -0.01783 | 0.96763      | 0.00090 | 10.0 s              |
| 17:21.2 | Data point 13     | 1.50000 mL | 0.04544 mL | 0.05233 mL | 0.03001 mL | 4.433 | -0.01718 | 0.93747      | 0.00088 | 11.5 s              |
| 18:08.5 | Data point 14     | 1.50000 mL | 0.04544 mL | 0.05327 mL | 0.03001 mL | 4.627 | -0.01904 | 0.93322      | 0.00097 | 12.0 s              |
| 18:45.9 | Data point 15     | 1.50000 mL | 0.04544 mL | 0.05390 mL | 0.03001 mL | 4.812 | -0.01725 | 0.84669      | 0.00093 | 12.0 s              |
| 19:23.3 | Data point 16     | 1.50000 mL | 0.04544 mL | 0.05435 mL | 0.03001 mL | 4.956 | -0.01847 | 0.93434      | 0.00094 | 15.0 s              |
| 20:08.9 | Data point 17     | 1.50000 mL | 0.04544 mL | 0.05489 mL | 0.03001 mL | 5.203 | -0.01881 | 0.92505      | 0.00097 | 16.0 s              |
| 20:55.1 | Data point 18     | 1.50000 mL | 0.04544 mL | 0.05529 mL | 0.03001 mL | 5.450 | -0.01772 | 0.88375      | 0.00093 | 17.5 s              |
| 21:43.1 | Data point 19     | 1.50000 mL | 0.04544 mL | 0.05555 mL | 0.03001 mL | 5.717 | -0.01934 | 0.94249      | 0.00098 | 17.0 s              |
| 22:35.7 | Data point 20     | 1.50000 mL | 0.04544 mL | 0.05586 mL | 0.03001 mL | 6.186 | -0.01984 | 0.97180      | 0.00099 | 33.0 s              |
| 23:39.3 | Data point 21     | 1.50000 mL | 0.04544 mL | 0.05602 mL | 0.03001 mL | 7.443 | -0.10565 | 0.99712      | 0.00522 | Timed out at 59.5 s |
| 25:15.0 | Data point 22     | 1.50000 mL | 0.04544 mL | 0.05616 mL | 0.03001 mL | 8.681 | -0.01903 | 0.92118      | 0.00098 | 59.5 s              |
| 26:50.1 | Data point 23     | 1.50000 mL | 0.04544 mL | 0.05628 mL | 0.03001 mL | 9.012 | -0.01984 | 0.96660      | 0.00100 | 37.5 s              |
| 28:26.7 | Data point 24     | 1.50000 mL | 0.10228 mL | 0.05628 mL | 0.07001 mL | 1.967 | -0.00938 | 0.82269      | 0.00051 | 10.0 s              |
| 29:12.7 | Data point 25     | 1.50000 mL | 0.10228 mL | 0.07319 mL | 0.07001 mL | 2.167 | -0.00239 | 0.33662      | 0.00020 | 10.0 s              |
| 29:48.4 | Data point 26     | 1.50000 mL | 0.10228 mL | 0.08462 mL | 0.07001 mL | 2.401 | -0.00220 | 0.08165      | 0.00038 | 10.5 s              |
| 30:24.5 | Data point 27     | 1.50000 mL | 0.10228 mL | 0.09142 mL | 0.07001 mL | 2.605 | -0.00054 | 0.07623      | 0.00010 | 10.0 s              |
| 31:00.1 | Data point 28     | 1.50000 mL | 0.10228 mL | 0.09591 mL | 0.07001 mL | 2.819 | -0.00633 | 0.20637      | 0.00069 | 10.0 s              |
| 31:35.6 | Data point 29     | 1.50000 mL | 0.10228 mL | 0.09899 mL | 0.07001 mL | 3.036 | -0.01322 | 0.81377      | 0.00072 | 10.5 s              |
| 32:11.6 | Data point 30     | 1.50000 mL | 0.10228 mL | 0.10129 mL | 0.07001 mL | 3.333 | -0.00473 | 0.38455      | 0.00038 | 10.0 s              |
| 32:57.3 | Data point 31     | 1.50000 mL | 0.10228 mL | 0.10285 mL | 0.07001 mL | 3.527 | -0.00844 | 0.34234      | 0.00071 | 10.0 s              |
| 33:48.3 | Data point 32     | 1.50000 mL | 0.10228 mL | 0.10449 mL | 0.07001 mL | 3.721 | -0.01104 | 0.52367      | 0.00075 | 10.5 s              |
| 34:24.3 | Data point 33     | 1.50000 mL | 0.10228 mL | 0.10595 mL | 0.07001 mL | 3.910 | -0.00623 | 0.66641      | 0.00038 | 10.0 s              |
| 34:59.8 | Data point 34     | 1.50000 mL | 0.10228 mL | 0.10717 mL | 0.07001 mL | 4.073 | -0.00589 | 0.76350      | 0.00033 | 10.5 s              |
| 35:51.2 | Data point 35     | 1.50000 mL | 0.10228 mL | 0.10840 mL | 0.07001 mL | 4.265 | -0.01218 | 0.79615      | 0.00067 | 10.0 s              |

Sample name: **M09\_octanol**  
 Assay name: **pH-metric high logP**  
 Assay ID: **18C-06007**  
 Filename: **C:\Sirius\_T3\Mehtap\20180306\_exp30\_logP\_T3-2\18C-06007\_M09\_octanol\_pH-metric high logP.t3r**

Experiment start time: **3/6/2018 3:40:58 PM**  
 Analyst: **Pion**  
 Instrument ID: **T312060**

## Events (continued)

| Time      | Event         | Water      | Acid       | Base       | Octanol    | pH    | dpH/dt   | pH R-squared | pH SD   | dpH/dt time         |
|-----------|---------------|------------|------------|------------|------------|-------|----------|--------------|---------|---------------------|
| 36:36.9   | Data point 36 | 1.50000 mL | 0.10228 mL | 0.10927 mL | 0.07001 mL | 4.453 | -0.01574 | 0.77656      | 0.00088 | 10.0 s              |
| 37:12.3   | Data point 37 | 1.50000 mL | 0.10228 mL | 0.10983 mL | 0.07001 mL | 4.611 | -0.01114 | 0.70830      | 0.00065 | 10.5 s              |
| 38:03.7   | Data point 38 | 1.50000 mL | 0.10228 mL | 0.11054 mL | 0.07001 mL | 4.855 | -0.01503 | 0.83195      | 0.00081 | 11.5 s              |
| 38:45.7   | Data point 39 | 1.50000 mL | 0.10228 mL | 0.11091 mL | 0.07001 mL | 5.055 | -0.00135 | 0.00984      | 0.00067 | 14.5 s              |
| 39:30.9   | Data point 40 | 1.50000 mL | 0.10228 mL | 0.11122 mL | 0.07001 mL | 5.310 | -0.01935 | 0.93748      | 0.00099 | 13.5 s              |
| 40:15.0   | Data point 41 | 1.50000 mL | 0.10228 mL | 0.11143 mL | 0.07001 mL | 5.577 | -0.01835 | 0.93150      | 0.00094 | 17.0 s              |
| 41:02.4   | Data point 42 | 1.50000 mL | 0.10228 mL | 0.11160 mL | 0.07001 mL | 5.932 | -0.01854 | 0.95517      | 0.00094 | 25.0 s              |
| 41:58.0   | Data point 43 | 1.50000 mL | 0.10228 mL | 0.11169 mL | 0.07001 mL | 6.304 | -0.01938 | 0.96132      | 0.00098 | 47.5 s              |
| 43:16.1   | Data point 44 | 1.50000 mL | 0.10228 mL | 0.11178 mL | 0.07001 mL | 7.096 | -0.08353 | 0.99184      | 0.00414 | Timed out at 59.5 s |
| 44:46.6   | Data point 45 | 1.50000 mL | 0.10228 mL | 0.11183 mL | 0.07001 mL | 7.214 | -0.05929 | 0.99332      | 0.00294 | Timed out at 59.5 s |
| 46:17.1   | Data point 46 | 1.50000 mL | 0.10228 mL | 0.11192 mL | 0.07001 mL | 8.104 | -0.05533 | 0.99034      | 0.00275 | Timed out at 59.5 s |
| 47:52.7   | Data point 47 | 1.50000 mL | 0.10228 mL | 0.11199 mL | 0.07001 mL | 8.361 | -0.02231 | 0.99013      | 0.00111 | Timed out at 59.5 s |
| 49:28.4   | Data point 48 | 1.50000 mL | 0.10228 mL | 0.11207 mL | 0.07001 mL | 8.675 | -0.01974 | 0.96662      | 0.00099 | 43.0 s              |
| 50:52.3   | Data point 49 | 1.50000 mL | 0.10228 mL | 0.11216 mL | 0.07001 mL | 8.935 | -0.01905 | 0.95683      | 0.00096 | 32.0 s              |
| 51:60.0   | Data point 50 | 1.50000 mL | 0.10228 mL | 0.11228 mL | 0.07001 mL | 9.123 | -0.01924 | 0.93622      | 0.00098 | 27.5 s              |
| 53:28.1   | Data point 51 | 1.50000 mL | 0.16298 mL | 0.11228 mL | 0.17001 mL | 1.963 | -0.00291 | 0.11888      | 0.00042 | 10.0 s              |
| 54:14.4   | Data point 52 | 1.50000 mL | 0.16298 mL | 0.13079 mL | 0.17001 mL | 2.162 | -0.00496 | 0.56826      | 0.00032 | 10.0 s              |
| 54:50.1   | Data point 53 | 1.50000 mL | 0.16298 mL | 0.14332 mL | 0.17001 mL | 2.380 | -0.01003 | 0.32764      | 0.00087 | 10.0 s              |
| 55:25.7   | Data point 54 | 1.50000 mL | 0.16298 mL | 0.15113 mL | 0.17001 mL | 2.605 | -0.00142 | 0.12787      | 0.00020 | 10.0 s              |
| 56:01.3   | Data point 55 | 1.50000 mL | 0.16298 mL | 0.15614 mL | 0.17001 mL | 2.814 | -0.00875 | 0.26635      | 0.00084 | 10.0 s              |
| 56:36.8   | Data point 56 | 1.50000 mL | 0.16298 mL | 0.15969 mL | 0.17001 mL | 3.044 | -0.00319 | 0.61153      | 0.00020 | 10.0 s              |
| 57:12.3   | Data point 57 | 1.50000 mL | 0.16298 mL | 0.16232 mL | 0.17001 mL | 3.248 | -0.01113 | 0.63073      | 0.00069 | 10.0 s              |
| 57:47.8   | Data point 58 | 1.50000 mL | 0.16298 mL | 0.16449 mL | 0.17001 mL | 3.462 | -0.00502 | 0.86633      | 0.00027 | 10.0 s              |
| 58:23.2   | Data point 59 | 1.50000 mL | 0.16298 mL | 0.16625 mL | 0.17001 mL | 3.691 | -0.01227 | 0.89636      | 0.00064 | 10.0 s              |
| 58:58.6   | Data point 60 | 1.50000 mL | 0.16298 mL | 0.16761 mL | 0.17001 mL | 3.895 | -0.01553 | 0.75391      | 0.00088 | 25.0 s              |
| 59:49.0   | Data point 61 | 1.50000 mL | 0.16298 mL | 0.16863 mL | 0.17001 mL | 4.072 | -0.01667 | 0.79855      | 0.00092 | 10.0 s              |
| 1:00:24.5 | Data point 62 | 1.50000 mL | 0.16298 mL | 0.16940 mL | 0.17001 mL | 4.230 | -0.00448 | 0.66946      | 0.00027 | 10.5 s              |
| 1:01:15.9 | Data point 63 | 1.50000 mL | 0.16298 mL | 0.17037 mL | 0.17001 mL | 4.459 | -0.00209 | 0.01107      | 0.00098 | 10.5 s              |
| 1:02:07.3 | Data point 64 | 1.50000 mL | 0.16298 mL | 0.17096 mL | 0.17001 mL | 4.659 | -0.01788 | 0.81862      | 0.00098 | 10.5 s              |
| 1:02:58.6 | Data point 65 | 1.50000 mL | 0.16298 mL | 0.17133 mL | 0.17001 mL | 4.856 | -0.01893 | 0.90105      | 0.00099 | 11.0 s              |
| 1:03:40.2 | Data point 66 | 1.50000 mL | 0.16298 mL | 0.17161 mL | 0.17001 mL | 5.111 | -0.01888 | 0.92060      | 0.00097 | 16.0 s              |
| 1:04:26.8 | Data point 67 | 1.50000 mL | 0.16298 mL | 0.17180 mL | 0.17001 mL | 5.425 | -0.01926 | 0.91497      | 0.00099 | 21.0 s              |
| 1:05:18.4 | Data point 68 | 1.50000 mL | 0.16298 mL | 0.17192 mL | 0.17001 mL | 5.713 | -0.01897 | 0.89914      | 0.00099 | 38.5 s              |
| 1:06:27.4 | Data point 69 | 1.50000 mL | 0.16298 mL | 0.17201 mL | 0.17001 mL | 6.169 | -0.01908 | 0.94473      | 0.00097 | 50.5 s              |
| 1:07:48.5 | Data point 70 | 1.50000 mL | 0.16298 mL | 0.17218 mL | 0.17001 mL | 7.721 | -0.10780 | 0.99169      | 0.00535 | Timed out at 59.5 s |
| 1:09:24.1 | Data point 71 | 1.50000 mL | 0.16298 mL | 0.17225 mL | 0.17001 mL | 8.041 | -0.05145 | 0.99163      | 0.00255 | Timed out at 59.5 s |
| 1:10:59.7 | Data point 72 | 1.50000 mL | 0.16298 mL | 0.17232 mL | 0.17001 mL | 8.452 | -0.02336 | 0.95422      | 0.00118 | Timed out at 59.5 s |
| 1:12:40.5 | Data point 73 | 1.50000 mL | 0.16298 mL | 0.17241 mL | 0.17001 mL | 8.754 | -0.01965 | 0.97546      | 0.00098 | 28.0 s              |
| 1:13:44.2 | Data point 74 | 1.50000 mL | 0.16298 mL | 0.17255 mL | 0.17001 mL | 9.015 | -0.01623 | 0.82712      | 0.00088 | 23.0 s              |
| 1:14:16.2 | Assay volumes | 1.50000 mL | 0.16298 mL | 0.17255 mL | 0.17001 mL |       |          |              |         |                     |

Sample name: **M09\_octanol**  
 Assay name: **pH-metric high logP**  
 Assay ID: **18C-06007**  
 Filename: **C:\Sirius\_T3\Mehtap\20180306\_exp30\_logP\_T3-2\18C-06007\_M09\_octanol\_pH-metric high logP.t3r**

Experiment start time: **3/6/2018 3:40:58 PM**  
 Analyst: **Pion**  
 Instrument ID: **T312060**

## Assay Settings

| Setting                             | Value              | Original Value | Date/Time changed | Imported from |
|-------------------------------------|--------------------|----------------|-------------------|---------------|
| <b>General Settings</b>             |                    |                |                   |               |
| Analyst name                        | Pion               |                |                   |               |
| <b>Standard Experiment Settings</b> |                    |                |                   |               |
| Number of titrations                | 3                  |                |                   |               |
| Minimum pH                          | 2.000              |                |                   |               |
| Maximum pH                          | 9.000              |                |                   |               |
| pH step between points of           | 0.200              |                |                   |               |
| Minimum titrant addition            | 0.00002 mL         |                |                   |               |
| Maximum titrant addition            | 0.10000 mL         |                |                   |               |
| Argon flow rate                     | 100%               |                |                   |               |
| Start titration using               | Cautious pH adjust |                |                   |               |
| <b>Advanced General Settings</b>    |                    |                |                   |               |
| Detect turbidity using              | None               |                |                   |               |
| Collect turbidity sensor data       | No                 |                |                   |               |
| Collect UV spectra                  | No                 |                |                   |               |
| Stir after titrant addition for     | 5 seconds          |                |                   |               |
| For titrant addition, stir at       | 10%                |                |                   |               |
| <b>Titration Pre-Dose</b>           |                    |                |                   |               |
| Titration pre-dose                  | None               |                |                   |               |
| <b>Assay Medium</b>                 |                    |                |                   |               |
| ISA water volume                    | 1.50 mL            |                |                   |               |
| Water added                         | Automatic          |                |                   |               |
| Partition solvent type              | Octanol            |                |                   |               |
| Partition volume                    | 0.030 mL           |                |                   |               |
| Partition solvent added             | Automatic          |                |                   |               |
| After partition addition, stir for  | 1 seconds          |                |                   |               |
| <b>Sample Sonication</b>            |                    |                |                   |               |
| Sonicate                            | Yes                |                |                   |               |
| Adjust pH for sonication            | No                 |                |                   |               |
| Sonicate for                        | 120 seconds        |                |                   |               |
| After sonication stir for           | 5 seconds          |                |                   |               |
| <b>Sample Dissolution</b>           |                    |                |                   |               |
| Perform a dissolution stage         | Yes                |                |                   |               |
| Adjust and hold pH for dissolution  | To start pH        |                |                   |               |
| Stir to dissolve for                | 120 seconds        |                |                   |               |
| For dissolution, stir at            | 10%                |                |                   |               |
| <b>Carbonate purge</b>              |                    |                |                   |               |
| Perform a carbonate purge           | No                 |                |                   |               |
| <b>Temperature Control</b>          |                    |                |                   |               |
| Wait for temperature                | Yes                |                |                   |               |
| Required start temperature          | 25.0°C             |                |                   |               |
| Acceptable deviation                | 0.5°C              |                |                   |               |
| Time to wait                        | 60 seconds         |                |                   |               |
| Stir speed of                       | 50%                |                |                   |               |
| <b>Titration 1</b>                  |                    |                |                   |               |
| Titrate from                        | Low to high pH     |                |                   |               |
| Adjust to start pH                  | Yes                |                |                   |               |
| After pH adjust stir for            | 30 seconds         |                |                   |               |
| Stir to allow partitioning for      | 15 seconds         |                |                   |               |
| Stirrer speed for partitioning      | 50%                |                |                   |               |
| <b>Titration 2</b>                  |                    |                |                   |               |
| Titrate from                        | Low to high pH     |                |                   |               |
| Add additional water                | 0.00 mL            |                |                   |               |
| Additional partition solvent volume | 0.040 mL           |                |                   |               |
| Additional partition solvent added  | Automatic          |                |                   |               |
| After pH adjust stir for            | 30 seconds         |                |                   |               |
| Stir to allow partitioning for      | 15 seconds         |                |                   |               |
| Stirrer speed for partitioning      | 55%                |                |                   |               |



Sample name: **M09\_octanol**  
Assay name: **pH-metric high logP**  
Assay ID: **18C-06007**  
Filename: **C:\Sirius\_T3\Mehtap\20180306\_exp30\_logP\_T3-2\18C-06007\_M09\_octanol\_pH-metric high logP.t3r**

Experiment start time: **3/6/2018 3:40:58 PM**  
Analyst: **Pion**  
Instrument ID: **T312060**

## Assay Settings (continued)

| Setting                             | Value          | Original Value | Date/Time changed | Imported from |
|-------------------------------------|----------------|----------------|-------------------|---------------|
| <b>Titration 3</b>                  |                |                |                   |               |
| Titrate from                        | Low to high pH |                |                   |               |
| Add additional water                | 0.00 mL        |                |                   |               |
| Additional partition solvent volume | 0.100 mL       |                |                   |               |
| Additional partition solvent added  | Automatic      |                |                   |               |
| After pH adjust stir for            | 30 seconds     |                |                   |               |
| Stir to allow partitioning for      | 15 seconds     |                |                   |               |
| Stirrer speed for partitioning      | 60%            |                |                   |               |
| <b>Data Point Stability</b>         |                |                |                   |               |
| Stir during data point collection   | No             |                |                   |               |
| Delay before data point collection  | 0 seconds      |                |                   |               |
| Number of points to average         | 20 points      |                |                   |               |
| Time interval between points        | 0.50 seconds   |                |                   |               |
| Required maximum standard deviation | 0.00100 dpH/dt |                |                   |               |
| Stability timeout after             | 60 seconds     |                |                   |               |

## Calibration Settings

| Setting                   | Value  | Date/Time changed   | Imported from                                    |
|---------------------------|--------|---------------------|--------------------------------------------------|
| Four-Plus alpha           | 0.124  | 3/6/2018 3:40:58 PM | C:\Sirius_T3\18C-06006_Blank standardisation.t3r |
| Four-Plus S               | 0.9973 | 3/6/2018 3:40:58 PM | C:\Sirius_T3\18C-06006_Blank standardisation.t3r |
| Four-Plus jH              | 0.9    | 3/6/2018 3:40:58 PM | C:\Sirius_T3\18C-06006_Blank standardisation.t3r |
| Four-Plus jOH             | -0.7   | 3/6/2018 3:40:58 PM | C:\Sirius_T3\18C-06006_Blank standardisation.t3r |
| Base concentration factor | 1.000  | 3/6/2018 3:40:58 PM | C:\Sirius_T3\KOH18B27.t3r                        |
| Acid concentration factor | 0.989  | 3/6/2018 3:40:58 PM | C:\Sirius_T3\18C-06006_Blank standardisation.t3r |

## Instrument Settings

| Setting              | Value                      | Batch Id    | Install date           |
|----------------------|----------------------------|-------------|------------------------|
| Instrument owner     | Merck                      |             |                        |
| Instrument ID        | T312060                    |             |                        |
| Instrument type      | T3 Simulator               |             |                        |
| Software version     | 1.1.3.0                    |             |                        |
| Dispenser module     |                            | T3DM1200361 | 3/31/2009 5:24:52 AM   |
| Dispenser 0          | Water                      |             | 3/31/2009 5:25:05 AM   |
| Syringe volume       | 2.5 mL                     |             |                        |
| Firmware version     | 1.2.1(r2)                  |             |                        |
| Titrant              | Water (0.15 M KCl)         | 02-06-2018  | 2/27/2018 10:05:59 AM  |
| Dispenser 2          | Acid                       |             | 3/31/2009 5:25:11 AM   |
| Syringe volume       | 0.5 mL                     |             |                        |
| Firmware version     | 1.2.1(r2)                  |             |                        |
| Titrant              | Acid (0.5 M HCl)           | 02-27-2018  | 2/27/2018 10:27:22 AM  |
| Dispenser 1          | Base                       |             | 3/31/2009 5:25:21 AM   |
| Syringe volume       | 0.5 mL                     |             |                        |
| Firmware version     | 1.2.1(r2)                  |             |                        |
| Titrant              | Base (0.5 M KOH)           | 9/22/2017   | 2/27/2018 10:21:22 AM  |
| Dispenser 5          | Cosolvent                  |             | 3/31/2009 5:26:24 AM   |
| Syringe volume       | 2.5 mL                     |             |                        |
| Firmware version     | 1.2.1(r2)                  |             |                        |
| Distribution valve 5 | Distribution Valve         |             | 3/31/2009 5:28:19 AM   |
| Firmware version     | 1.1.3                      |             |                        |
| Port A               | Methanol (80%, 0.15 M KCl) | 02-08-2018  | 3/6/2018 9:28:59 AM    |
| Port B               | Cyclohexane                | 11-01-17    | 2/27/2018 10:37:57 AM  |
| Dispenser 3          | Buffer                     |             | 8/3/2010 5:05:16 AM    |
| Syringe volume       | 0.5 mL                     |             |                        |
| Firmware version     | 1.2.1(r2)                  |             |                        |
| Titrant              | Dodecane                   | 2018/01/31  | 2/28/2018 10:18:04 AM  |
| Dispenser 6          | Octanol                    |             | 10/22/2010 10:52:43 AM |



Sample name: **M09\_octanol** Experiment start time: **3/6/2018 3:40:58 PM**  
 Assay name: **pH-metric high logP** Analyst: **Pion**  
 Assay ID: **18C-06007** Instrument ID: **T312060**  
 Filename: **C:\Sirius\_T3\Mehtap\20180306\_exp30\_logP\_T3-2\18C-06007\_M09\_octanol\_pH-metric high logP.t3r**

## Instrument Settings (continued)

| Setting                                   | Value                      | Batch Id    | Install date           |
|-------------------------------------------|----------------------------|-------------|------------------------|
| Syringe volume                            | 0.5 mL                     |             |                        |
| Firmware version                          | 1.2.1(r2)                  |             |                        |
| Titrant                                   | Octanol                    | 01-31-2018  | 2/27/2018 9:59:35 AM   |
| Titration                                 |                            | T3TM1200161 | 3/31/2009 5:24:17 AM   |
| Horizontal axis firmware version          | 1.17 AI1DI2DO2 Stepper 2   |             |                        |
| Vertical axis firmware version            | 1.17 AI1DI2DO2 Stepper 2   |             |                        |
| Chassis I/O firmware version              | 1.11 AI1DI0DO4 Norgren I/O |             |                        |
| Probe I/O firmware version                | 1.1.1                      |             |                        |
| Electrode                                 | T3 Electrode               | T3E0923     | 1/23/2018 2:01:00 PM   |
| E0 calibration                            | +6.73 mV                   |             | 3/6/2018 3:41:43 PM    |
| Filling solution                          | 3M KCl                     | KCL097      | 3/6/2018 9:23:20 AM    |
| Liquids                                   |                            |             |                        |
| Wash 1                                    | 50% IPA:50% Water          |             | 3/6/2018 9:24:32 AM    |
| Wash 2                                    | 0.5% Triton X-100 in H2O   |             | 3/6/2018 9:24:35 AM    |
| Buffer position 1                         | pH7 Wash                   |             | 3/6/2018 9:24:38 AM    |
| Buffer position 2                         | pH 7                       |             | 3/6/2018 9:24:40 AM    |
| Storage position                          |                            |             | 3/6/2018 9:24:07 AM    |
| Wash water                                | 6.1e+003 mL                | 02-27-2018  | 2/27/2018 9:54:39 AM   |
| Waste                                     | 9.4e+003 mL                |             | 11/28/2017 10:36:29 AM |
| Temperature controller                    |                            |             | 8/5/2010 6:35:13 AM    |
| Turbidity detector                        |                            |             | 3/31/2009 5:24:45 AM   |
| Spectrometer                              |                            | 074811      | 11/23/2010 11:22:28 AM |
| Dip probe                                 |                            | 10196       |                        |
| Wavelength coefficient A0                 | 183.333                    |             |                        |
| Wavelength coefficient A1                 | 2.21568                    |             |                        |
| Wavelength coefficient A2                 | -0.000289308               |             |                        |
| Total lamp lit time                       | 123:01:40                  |             | 11/23/2010 11:22:28 AM |
| Calibrated on                             | 2/27/2018 10:40:38 AM      |             |                        |
| Integration time                          | 40                         |             |                        |
| Scans averaged                            | 10                         |             |                        |
| Autoloader                                |                            | T3AL1200345 | 11/10/2015 9:34:13 AM  |
| Left-right axis firmware version          | 1.17 AI1DI2DO2 Stepper 2   |             |                        |
| Front-back axis firmware version          | 1.17 AI1DI2DO2 Stepper 2   |             |                        |
| Vertical axis firmware version            | 1.17 AI1DI2DO2 Stepper 2   |             |                        |
| Chassis I/O firmware version              | 1.11 AI1DI0DO4 Norgren I/O |             |                        |
| Configuration                             |                            |             |                        |
| Alternate titration position              | Titration position         |             |                        |
| Alternate reference position              | Reference position         |             |                        |
| Maximum standard vial volume              | 3.50 mL                    |             |                        |
| Maximum alternate vial volume             | 25.00 mL                   |             |                        |
| Automatic action idle period              | 5 minute(s)                |             |                        |
| Titration tube volume                     | 1.3 mL                     |             |                        |
| Syringe flush count                       | 3.50                       |             |                        |
| Flowing wash pump volume                  | 20.0 mL                    |             |                        |
| Flowing wash stir duration                | 5 s                        |             |                        |
| Flowing wash stir speed                   | 30%                        |             |                        |
| Solvent wash stir duration                | 5 s                        |             |                        |
| Solvent wash stir speed                   | 30%                        |             |                        |
| Surfactant wash stir duration             | 5 s                        |             |                        |
| Surfactant wash stir speed                | 30%                        |             |                        |
| E0 calibration minimum number of points   | 10                         |             |                        |
| E0 calibration maximum standard deviation | 0.01500                    |             |                        |
| E0 calibration timeout period             | 60 s                       |             |                        |
| E0 calibration stir duration              | 5 s                        |             |                        |
| E0 calibration preparation stir speed     | 30%                        |             |                        |
| E0 calibration buffer wash stir duration  | 5 s                        |             |                        |
| E0 calibration buffer wash stir speed     | 30%                        |             |                        |
| E0 calibration reading stir speed         | 0%                         |             |                        |

|              |                                                                                                   |                        |                            |
|--------------|---------------------------------------------------------------------------------------------------|------------------------|----------------------------|
| Sample name: | <b>M09_octanol</b>                                                                                | Experiment start time: | <b>3/6/2018 3:40:58 PM</b> |
| Assay name:  | <b>pH-metric high logP</b>                                                                        | Analyst:               | <b>Pion</b>                |
| Assay ID:    | <b>18C-06007</b>                                                                                  | Instrument ID:         | <b>T312060</b>             |
| Filename:    | <b>C:\Sirius_T3\Mehtap\20180306_exp30_logP_T3-2\18C-06007_M09_octanol_pH-metric high logP.t3r</b> |                        |                            |

## Instrument Settings (continued)

| Setting                                     | Value   | Batch Id | Install date |
|---------------------------------------------|---------|----------|--------------|
| Spectrometer calibration stir duration      | 5 s     |          |              |
| Spectrometer calibration stir speed         | 30%     |          |              |
| Spectrometer calibration wash pump volume   | 20.0 mL |          |              |
| Spectrometer calibration wash stir duration | 5 s     |          |              |
| Spectrometer calibration wash stir speed    | 30%     |          |              |
| Overhead dispense height                    | 10000   |          |              |

## Refinement Settings

| Setting                        | Value    | Default value |
|--------------------------------|----------|---------------|
| Turbidity detection method     | None     | None          |
| Turbidity wavelength to assess | 500.0 nm | 500.0 nm      |
| Turbidity maximum absorbance   | 0.100    | 0.100         |
| Turbidity probe threshold      | 50.00    | 50.00         |

## Experiment Log

[1:59] Air gap released for Acid (0.5 M HCl)  
 [2:54] Air gap created for Water (0.15 M KCl)  
 [2:54] Air gap created for Acid (0.5 M HCl)  
 [2:55] Air gap created for Base (0.5 M KOH)  
 [2:55] Air gap released for Water (0.15 M KCl)  
 [2:59] Titrator arm moved over Titration position  
 [2:59] Titration 1 of 3  
 [2:59] Adding initial titrants  
 [2:59] Automatically add 1.50000 mL of water  
 [3:24] Dispensed 1.500000 mL of Water (0.15 M KCl)  
 [3:28] Titrator arm moved over Drain  
 [6:10] Titrator arm moved to Titration position  
 [6:10] Argon flow rate set to 100  
 [6:10] Stirrer speed set to 10  
 [6:15] Automatically add 0.03000 mL of Octanol  
 [6:16] Dispensed 0.030009 mL of Octanol  
 [6:17] Initial pH = 3.92  
 [6:17] Iterative adjust 3.92 -> 2.00  
 [6:17] pH 3.92 -> 2.00  
 [6:18] Air gap released for Acid (0.5 M HCl)  
 [6:19] Dispensed 0.045437 mL of Acid (0.5 M HCl)  
 [6:24] Holding pH 2.00  
 [8:24] Stirrer speed set to 0  
 [8:24] Stirrer speed set to 50  
 [8:24] Iterative adjust 1.94 -> 2.00  
 [8:24] pH 1.94 -> 2.00  
 [8:25] Air gap released for Base (0.5 M KOH)  
 [8:26] Dispensed 0.006091 mL of Base (0.5 M KOH)  
 [9:16] Stirrer speed set to 0  
 [9:26] Datapoint id 1 collected  
 [9:26] Stirrer speed set to 50  
 [9:31] pH 2.01 -> 2.21  
 [9:31] Using cautious pH adjust  
 [9:32] Dispensed 0.007714 mL of Base (0.5 M KOH)  
 [9:37] Stepping pH = 2.10  
 [9:37] Dispensed 0.006185 mL of Base (0.5 M KOH)  
 [9:42] Stepping pH = 2.19  
 [9:42] Dispensed 0.000847 mL of Base (0.5 M KOH)  
 [9:47] Stepping pH = 2.21  
 [10:03] Stirrer speed set to 0  
 [10:13] Datapoint id 2 collected  
 [10:13] Charge balance equation is out by 4.3%

Sample name: **M09\_octanol**  
Assay name: **pH-metric high logP**  
Assay ID: **18C-06007**  
Filename: **C:\Sirius\_T3\Mehtap\20180306\_exp30\_logP\_T3-2\18C-06007\_M09\_octanol\_pH-metric high logP.t3r**

Experiment start time: **3/6/2018 3:40:58 PM**  
Analyst: **Pion**  
Instrument ID: **T312060**

## Experiment Log (continued)

[10:13] Stirrer speed set to 50  
[10:18] pH 2.21 -> 2.41  
[10:18] Using charge balance adjust  
[10:19] Dispensed 0.009690 mL of Base (0.5 M KOH)  
[10:39] Stirrer speed set to 0  
[10:49] Datapoint id 3 collected  
[10:49] Charge balance equation is out by 1.3%  
[10:49] Stirrer speed set to 50  
[10:54] pH 2.42 -> 2.62  
[10:54] Using charge balance adjust  
[10:54] Dispensed 0.006044 mL of Base (0.5 M KOH)  
[11:15] Stirrer speed set to 0  
[11:25] Datapoint id 4 collected  
[11:25] Charge balance equation is out by 13.5%  
[11:25] Stirrer speed set to 50  
[11:30] pH 2.66 -> 2.86  
[11:30] Using charge balance adjust  
[11:30] Dispensed 0.003669 mL of Base (0.5 M KOH)  
[11:50] Stirrer speed set to 0  
[12:00] Datapoint id 5 collected  
[12:00] Charge balance equation is out by 3.7%  
[12:00] Stirrer speed set to 50  
[12:05] pH 2.87 -> 3.07  
[12:05] Using charge balance adjust  
[12:05] Dispensed 0.002469 mL of Base (0.5 M KOH)  
[12:26] Stirrer speed set to 0  
[12:36] Datapoint id 6 collected  
[12:36] Charge balance equation is out by 10.9%  
[12:36] Stirrer speed set to 50  
[12:41] pH 3.10 -> 3.30  
[12:41] Using charge balance adjust  
[12:41] Dispensed 0.001811 mL of Base (0.5 M KOH)  
[13:01] Stirrer speed set to 0  
[13:11] Datapoint id 7 collected  
[13:11] Charge balance equation is out by 30.3%  
[13:11] Stirrer speed set to 50  
[13:16] pH 3.36 -> 3.56  
[13:16] Using cautious pH adjust  
[13:16] Dispensed 0.000753 mL of Base (0.5 M KOH)  
[13:21] Stepping pH = 3.49  
[13:21] Dispensed 0.000329 mL of Base (0.5 M KOH)  
[13:27] Stepping pH = 3.54  
[13:27] Dispensed 0.000118 mL of Base (0.5 M KOH)  
[13:32] Stepping pH = 3.55  
[13:47] Stirrer speed set to 0  
[13:57] Datapoint id 8 collected  
[13:57] Charge balance equation is out by 19.6%  
[13:57] Stirrer speed set to 50  
[14:02] pH 3.55 -> 3.75  
[14:02] Using cautious pH adjust  
[14:02] Dispensed 0.000729 mL of Base (0.5 M KOH)  
[14:07] Stepping pH = 3.68  
[14:07] Dispensed 0.000329 mL of Base (0.5 M KOH)  
[14:12] Stepping pH = 3.72  
[14:12] Dispensed 0.000165 mL of Base (0.5 M KOH)  
[14:17] Stepping pH = 3.74  
[14:33] Stirrer speed set to 0  
[14:43] Datapoint id 9 collected  
[14:43] Charge balance equation is out by 16.9%

Sample name: **M09\_octanol**  
Assay name: **pH-metric high logP**  
Assay ID: **18C-06007**  
Filename: **C:\Sirius\_T3\Mehtap\20180306\_exp30\_logP\_T3-2\18C-06007\_M09\_octanol\_pH-metric high logP.t3r**

Experiment start time: **3/6/2018 3:40:58 PM**  
Analyst: **Pion**  
Instrument ID: **T312060**

## Experiment Log (continued)

[14:43] Stirrer speed set to 50  
[14:48] pH 3.73 -> 3.93  
[14:48] Using cautious pH adjust  
[14:48] Dispensed 0.000706 mL of Base (0.5 M KOH)  
[14:53] Stepping pH = 3.84  
[14:53] Dispensed 0.000423 mL of Base (0.5 M KOH)  
[14:58] Stepping pH = 3.89  
[14:59] Dispensed 0.000259 mL of Base (0.5 M KOH)  
[15:04] Stepping pH = 3.92  
[15:19] Stirrer speed set to 0  
[15:29] Datapoint id 10 collected  
[15:29] Charge balance equation is out by 2.0%  
[15:29] Stirrer speed set to 50  
[15:34] pH 3.92 -> 4.12  
[15:34] Using charge balance adjust  
[15:34] Dispensed 0.001364 mL of Base (0.5 M KOH)  
[15:54] Stirrer speed set to 0  
[16:05] Datapoint id 11 collected  
[16:05] Charge balance equation is out by -13.7%  
[16:05] Stirrer speed set to 50  
[16:10] pH 4.10 -> 4.30  
[16:10] Using charge balance adjust  
[16:11] Dispensed 0.001223 mL of Base (0.5 M KOH)  
[16:31] Stirrer speed set to 0  
[16:41] Datapoint id 12 collected  
[16:41] Charge balance equation is out by -26.8%  
[16:41] Stirrer speed set to 50  
[16:46] pH 4.25 -> 4.45  
[16:46] Using cautious pH adjust  
[16:46] Dispensed 0.000541 mL of Base (0.5 M KOH)  
[16:51] Stepping pH = 4.33  
[16:51] Dispensed 0.000541 mL of Base (0.5 M KOH)  
[16:56] Stepping pH = 4.42  
[16:56] Dispensed 0.000188 mL of Base (0.5 M KOH)  
[17:01] Stepping pH = 4.43  
[17:01] Dispensed 0.000141 mL of Base (0.5 M KOH)  
[17:06] Stepping pH = 4.45  
[17:22] Stirrer speed set to 0  
[17:33] Datapoint id 13 collected  
[17:33] Charge balance equation is out by -31.1%  
[17:33] Stirrer speed set to 50  
[17:38] pH 4.44 -> 4.64  
[17:38] Using cautious pH adjust  
[17:38] Dispensed 0.000423 mL of Base (0.5 M KOH)  
[17:43] Stepping pH = 4.55  
[17:43] Dispensed 0.000259 mL of Base (0.5 M KOH)  
[17:49] Stepping pH = 4.59  
[17:49] Dispensed 0.000259 mL of Base (0.5 M KOH)  
[17:54] Stepping pH = 4.64  
[18:09] Stirrer speed set to 0  
[18:21] Datapoint id 14 collected  
[18:21] Charge balance equation is out by -9.3%  
[18:21] Stirrer speed set to 50  
[18:26] pH 4.64 -> 4.84  
[18:26] Using charge balance adjust  
[18:26] Dispensed 0.000635 mL of Base (0.5 M KOH)  
[18:46] Stirrer speed set to 0  
[18:58] Datapoint id 15 collected  
[18:58] Charge balance equation is out by -14.0%

Sample name: **M09\_octanol**  
Assay name: **pH-metric high logP**  
Assay ID: **18C-06007**  
Filename: **C:\Sirius\_T3\Mehtap\20180306\_exp30\_logP\_T3-2\18C-06007\_M09\_octanol\_pH-metric high logP.t3r**

Experiment start time: **3/6/2018 3:40:58 PM**  
Analyst: **Pion**  
Instrument ID: **T312060**

## Experiment Log (continued)

[18:58] Stirrer speed set to 50  
[19:03] pH 4.83 -> 5.03  
[19:03] Using charge balance adjust  
[19:03] Dispensed 0.000447 mL of Base (0.5 M KOH)  
[19:24] Stirrer speed set to 0  
[19:39] Datapoint id 16 collected  
[19:39] Charge balance equation is out by -38.2%  
[19:39] Stirrer speed set to 50  
[19:44] pH 4.98 -> 5.18  
[19:44] Using cautious pH adjust  
[19:44] Dispensed 0.000165 mL of Base (0.5 M KOH)  
[19:49] Stepping pH = 5.01  
[19:49] Dispensed 0.000376 mL of Base (0.5 M KOH)  
[19:54] Stepping pH = 5.25  
[20:09] Stirrer speed set to 0  
[20:25] Datapoint id 17 collected  
[20:25] Charge balance equation is out by -62.0%  
[20:25] Stirrer speed set to 50  
[20:30] pH 5.23 -> 5.43  
[20:30] Using cautious pH adjust  
[20:30] Dispensed 0.000118 mL of Base (0.5 M KOH)  
[20:35] Stepping pH = 5.25  
[20:35] Dispensed 0.000282 mL of Base (0.5 M KOH)  
[20:40] Stepping pH = 5.49  
[20:55] Stirrer speed set to 0  
[21:13] Datapoint id 18 collected  
[21:13] Charge balance equation is out by -85.2%  
[21:13] Stirrer speed set to 50  
[21:18] pH 5.49 -> 5.69  
[21:18] Using cautious pH adjust  
[21:18] Dispensed 0.000071 mL of Base (0.5 M KOH)  
[21:23] Stepping pH = 5.50  
[21:23] Dispensed 0.000188 mL of Base (0.5 M KOH)  
[21:28] Stepping pH = 5.74  
[21:43] Stirrer speed set to 0  
[22:00] Datapoint id 19 collected  
[22:00] Charge balance equation is out by -94.3%  
[22:00] Stirrer speed set to 50  
[22:06] pH 5.76 -> 5.96  
[22:06] Using cautious pH adjust  
[22:06] Dispensed 0.000047 mL of Base (0.5 M KOH)  
[22:11] Stepping pH = 5.77  
[22:11] Dispensed 0.000141 mL of Base (0.5 M KOH)  
[22:16] Stepping pH = 5.85  
[22:16] Dispensed 0.000118 mL of Base (0.5 M KOH)  
[22:21] Stepping pH = 6.19  
[22:36] Stirrer speed set to 0  
[23:09] Datapoint id 20 collected  
[23:09] Charge balance equation is out by -210.5%  
[23:09] Stirrer speed set to 50  
[23:14] pH 6.23 -> 6.43  
[23:14] Using cautious pH adjust  
[23:14] Dispensed 0.000024 mL of Base (0.5 M KOH)  
[23:19] Stepping pH = 6.23  
[23:19] Dispensed 0.000141 mL of Base (0.5 M KOH)  
[23:25] Stepping pH = 7.24  
[23:40] Stirrer speed set to 0  
[24:40] Datapoint id 21 collected  
[24:40] Charge balance equation is out by -211.2%

Sample name: **M09\_octanol**  
Assay name: **pH-metric high logP**  
Assay ID: **18C-06007**  
Filename: **C:\Sirius\_T3\Mehtap\20180306\_exp30\_logP\_T3-2\18C-06007\_M09\_octanol\_pH-metric high logP.t3r**

Experiment start time: **3/6/2018 3:40:58 PM**  
Analyst: **Pion**  
Instrument ID: **T312060**

## Experiment Log (continued)

[24:40] Stirrer speed set to 50  
[24:45] pH 7.39 -> 7.59  
[24:45] Using cautious pH adjust  
[24:45] Dispensed 0.000024 mL of Base (0.5 M KOH)  
[24:50] Stepping pH = 7.36  
[24:50] Dispensed 0.000024 mL of Base (0.5 M KOH)  
[24:55] Stepping pH = 7.36  
[24:55] Dispensed 0.000094 mL of Base (0.5 M KOH)  
[25:00] Stepping pH = 8.58  
[25:15] Stirrer speed set to 0  
[26:15] Datapoint id 22 collected  
[26:15] Charge balance equation is out by -1,276.8%  
[26:15] Stirrer speed set to 50  
[26:20] pH 8.72 -> 8.92  
[26:20] Using cautious pH adjust  
[26:20] Dispensed 0.000024 mL of Base (0.5 M KOH)  
[26:25] Stepping pH = 8.71  
[26:25] Dispensed 0.000071 mL of Base (0.5 M KOH)  
[26:30] Stepping pH = 8.89  
[26:30] Dispensed 0.000024 mL of Base (0.5 M KOH)  
[26:35] Stepping pH = 9.02  
[26:50] Stirrer speed set to 0  
[27:28] Datapoint id 23 collected  
[27:28] Charge balance equation is out by -331.4%  
[27:28] Titration 2 of 3  
[27:28] Adding initial titrants  
[27:28] Automatically add 0.04000 mL of Octanol  
[27:29] Dispensed 0.040005 mL of Octanol  
[27:29] Stirrer speed set to 10  
[27:30] Stirrer speed set to 55  
[27:30] Iterative adjust 9.02 -> 2.00  
[27:30] pH 9.02 -> 2.00  
[27:31] Dispensed 0.054351 mL of Acid (0.5 M HCl)  
[27:36] pH 2.02 -> 2.00  
[27:37] Dispensed 0.002493 mL of Acid (0.5 M HCl)  
[28:27] Stirrer speed set to 0  
[28:37] Datapoint id 24 collected  
[28:37] Stirrer speed set to 55  
[28:42] pH 1.97 -> 2.17  
[28:42] Using cautious pH adjust  
[28:42] Dispensed 0.009149 mL of Base (0.5 M KOH)  
[28:47] Stepping pH = 2.07  
[28:48] Dispensed 0.005691 mL of Base (0.5 M KOH)  
[28:53] Stepping pH = 2.14  
[28:53] Dispensed 0.002070 mL of Base (0.5 M KOH)  
[28:58] Stepping pH = 2.17  
[29:13] Stirrer speed set to 0  
[29:23] Datapoint id 25 collected  
[29:23] Charge balance equation is out by 7.6%  
[29:23] Stirrer speed set to 55  
[29:28] pH 2.17 -> 2.37  
[29:28] Using charge balance adjust  
[29:29] Dispensed 0.011430 mL of Base (0.5 M KOH)  
[29:49] Stirrer speed set to 0  
[29:59] Datapoint id 26 collected  
[29:59] Charge balance equation is out by 13.7%  
[29:59] Stirrer speed set to 55  
[30:04] pH 2.41 -> 2.61  
[30:04] Using charge balance adjust



Sample name: **M09\_octanol**  
Assay name: **pH-metric high logP**  
Assay ID: **18C-06007**  
Filename: **C:\Sirius\_T3\Mehtap\20180306\_exp30\_logP\_T3-2\18C-06007\_M09\_octanol\_pH-metric high logP.t3r**

Experiment start time: **3/6/2018 3:40:58 PM**  
Analyst: **Pion**  
Instrument ID: **T312060**

## Experiment Log (continued)

[30:05] Dispensed 0.006797 mL of Base (0.5 M KOH)  
[30:25] Stirrer speed set to 0  
[30:35] Datapoint id 27 collected  
[30:35] Charge balance equation is out by -1.0%  
[30:35] Stirrer speed set to 55  
[30:40] pH 2.61 -> 2.81  
[30:40] Using charge balance adjust  
[30:40] Dispensed 0.004492 mL of Base (0.5 M KOH)  
[31:00] Stirrer speed set to 0  
[31:10] Datapoint id 28 collected  
[31:10] Charge balance equation is out by 4.7%  
[31:10] Stirrer speed set to 55  
[31:16] pH 2.82 -> 3.02  
[31:16] Using charge balance adjust  
[31:16] Dispensed 0.003081 mL of Base (0.5 M KOH)  
[31:36] Stirrer speed set to 0  
[31:46] Datapoint id 29 collected  
[31:46] Charge balance equation is out by 6.2%  
[31:46] Stirrer speed set to 55  
[31:52] pH 3.04 -> 3.24  
[31:52] Using charge balance adjust  
[31:52] Dispensed 0.002305 mL of Base (0.5 M KOH)  
[32:12] Stirrer speed set to 0  
[32:22] Datapoint id 30 collected  
[32:22] Charge balance equation is out by 46.1%  
[32:22] Stirrer speed set to 55  
[32:27] pH 3.34 -> 3.54  
[32:27] Using cautious pH adjust  
[32:27] Dispensed 0.000917 mL of Base (0.5 M KOH)  
[32:32] Stepping pH = 3.46  
[32:32] Dispensed 0.000447 mL of Base (0.5 M KOH)  
[32:37] Stepping pH = 3.51  
[32:37] Dispensed 0.000188 mL of Base (0.5 M KOH)  
[32:43] Stepping pH = 3.53  
[32:58] Stirrer speed set to 0  
[33:08] Datapoint id 31 collected  
[33:08] Charge balance equation is out by 15.3%  
[33:08] Stirrer speed set to 55  
[33:13] pH 3.53 -> 3.73  
[33:13] Using cautious pH adjust  
[33:13] Dispensed 0.000823 mL of Base (0.5 M KOH)  
[33:18] Stepping pH = 3.64  
[33:18] Dispensed 0.000494 mL of Base (0.5 M KOH)  
[33:23] Stepping pH = 3.70  
[33:23] Dispensed 0.000212 mL of Base (0.5 M KOH)  
[33:28] Stepping pH = 3.72  
[33:28] Dispensed 0.000118 mL of Base (0.5 M KOH)  
[33:34] Stepping pH = 3.73  
[33:49] Stirrer speed set to 0  
[33:59] Datapoint id 32 collected  
[33:59] Charge balance equation is out by -0.4%  
[33:59] Stirrer speed set to 55  
[34:04] pH 3.72 -> 3.92  
[34:04] Using charge balance adjust  
[34:04] Dispensed 0.001458 mL of Base (0.5 M KOH)  
[34:25] Stirrer speed set to 0  
[34:35] Datapoint id 33 collected  
[34:35] Charge balance equation is out by -7.5%  
[34:35] Stirrer speed set to 55

Sample name: **M09\_octanol**  
Assay name: **pH-metric high logP**  
Assay ID: **18C-06007**  
Filename: **C:\Sirius\_T3\Mehtap\20180306\_exp30\_logP\_T3-2\18C-06007\_M09\_octanol\_pH-metric high logP.t3r**

Experiment start time: **3/6/2018 3:40:58 PM**  
Analyst: **Pion**  
Instrument ID: **T312060**

## Experiment Log (continued)

[34:40] pH 3.91 -> 4.11  
[34:40] Using charge balance adjust  
[34:40] Dispensed 0.001223 mL of Base (0.5 M KOH)  
[35:00] Stirrer speed set to 0  
[35:11] Datapoint id 34 collected  
[35:11] Charge balance equation is out by -20.6%  
[35:11] Stirrer speed set to 55  
[35:16] pH 4.08 -> 4.28  
[35:16] Using cautious pH adjust  
[35:16] Dispensed 0.000517 mL of Base (0.5 M KOH)  
[35:21] Stepping pH = 4.16  
[35:21] Dispensed 0.000470 mL of Base (0.5 M KOH)  
[35:26] Stepping pH = 4.24  
[35:26] Dispensed 0.000165 mL of Base (0.5 M KOH)  
[35:31] Stepping pH = 4.27  
[35:31] Dispensed 0.000071 mL of Base (0.5 M KOH)  
[35:36] Stepping pH = 4.27  
[35:51] Stirrer speed set to 0  
[36:02] Datapoint id 35 collected  
[36:02] Charge balance equation is out by -18.3%  
[36:02] Stirrer speed set to 55  
[36:07] pH 4.27 -> 4.47  
[36:07] Using cautious pH adjust  
[36:07] Dispensed 0.000376 mL of Base (0.5 M KOH)  
[36:12] Stepping pH = 4.35  
[36:12] Dispensed 0.000329 mL of Base (0.5 M KOH)  
[36:17] Stepping pH = 4.42  
[36:17] Dispensed 0.000165 mL of Base (0.5 M KOH)  
[36:22] Stepping pH = 4.46  
[36:37] Stirrer speed set to 0  
[36:47] Datapoint id 36 collected  
[36:47] Charge balance equation is out by -13.4%  
[36:47] Stirrer speed set to 55  
[36:52] pH 4.46 -> 4.66  
[36:52] Using charge balance adjust  
[36:52] Dispensed 0.000564 mL of Base (0.5 M KOH)  
[37:13] Stirrer speed set to 0  
[37:23] Datapoint id 37 collected  
[37:23] Charge balance equation is out by -25.1%  
[37:23] Stirrer speed set to 55  
[37:28] pH 4.62 -> 4.82  
[37:28] Using cautious pH adjust  
[37:28] Dispensed 0.000212 mL of Base (0.5 M KOH)  
[37:33] Stepping pH = 4.67  
[37:34] Dispensed 0.000306 mL of Base (0.5 M KOH)  
[37:39] Stepping pH = 4.79  
[37:39] Dispensed 0.000047 mL of Base (0.5 M KOH)  
[37:44] Stepping pH = 4.80  
[37:44] Dispensed 0.000141 mL of Base (0.5 M KOH)  
[37:49] Stepping pH = 4.86  
[38:04] Stirrer speed set to 0  
[38:16] Datapoint id 38 collected  
[38:16] Charge balance equation is out by -66.8%  
[38:16] Stirrer speed set to 55  
[38:21] pH 4.87 -> 5.07  
[38:21] Using cautious pH adjust  
[38:21] Dispensed 0.000118 mL of Base (0.5 M KOH)  
[38:26] Stepping pH = 4.90  
[38:26] Dispensed 0.000259 mL of Base (0.5 M KOH)



Sample name: **M09\_octanol**  
 Assay name: **pH-metric high logP**  
 Assay ID: **18C-06007**  
 Filename: **C:\Sirius\_T3\Mehtap\20180306\_exp30\_logP\_T3-2\18C-06007\_M09\_octanol\_pH-metric high logP.t3r**

Experiment start time: **3/6/2018 3:40:58 PM**  
 Analyst: **Pion**  
 Instrument ID: **T312060**

## Experiment Log (continued)

[38:31] Stepping pH = 5.07  
 [38:46] Stirrer speed set to 0  
 [39:01] Datapoint id 39 collected  
 [39:01] Charge balance equation is out by -50.1%  
 [39:01] Stirrer speed set to 55  
 [39:06] pH 5.08 -> 5.28  
 [39:06] Using cautious pH adjust  
 [39:06] Dispensed 0.000094 mL of Base (0.5 M KOH)  
 [39:11] Stepping pH = 5.10  
 [39:11] Dispensed 0.000212 mL of Base (0.5 M KOH)  
 [39:16] Stepping pH = 5.32  
 [39:31] Stirrer speed set to 0  
 [39:45] Datapoint id 40 collected  
 [39:45] Charge balance equation is out by -73.8%  
 [39:45] Stirrer speed set to 55  
 [39:50] pH 5.34 -> 5.54  
 [39:50] Using cautious pH adjust  
 [39:50] Dispensed 0.000047 mL of Base (0.5 M KOH)  
 [39:55] Stepping pH = 5.34  
 [39:55] Dispensed 0.000165 mL of Base (0.5 M KOH)  
 [40:00] Stepping pH = 5.59  
 [40:15] Stirrer speed set to 0  
 [40:32] Datapoint id 41 collected  
 [40:32] Charge balance equation is out by -98.5%  
 [40:32] Stirrer speed set to 55  
 [40:37] pH 5.61 -> 5.81  
 [40:37] Using cautious pH adjust  
 [40:37] Dispensed 0.000047 mL of Base (0.5 M KOH)  
 [40:43] Stepping pH = 5.62  
 [40:43] Dispensed 0.000118 mL of Base (0.5 M KOH)  
 [40:48] Stepping pH = 5.97  
 [41:03] Stirrer speed set to 0  
 [41:28] Datapoint id 42 collected  
 [41:28] Charge balance equation is out by -92.4%  
 [41:28] Stirrer speed set to 55  
 [41:33] pH 5.99 -> 6.19  
 [41:33] Using cautious pH adjust  
 [41:33] Dispensed 0.000024 mL of Base (0.5 M KOH)  
 [41:38] Stepping pH = 6.00  
 [41:38] Dispensed 0.000071 mL of Base (0.5 M KOH)  
 [41:43] Stepping pH = 6.30  
 [41:58] Stirrer speed set to 0  
 [42:46] Datapoint id 43 collected  
 [42:46] Charge balance equation is out by -90.5%  
 [42:46] Stirrer speed set to 55  
 [42:51] pH 6.33 -> 6.53  
 [42:51] Using cautious pH adjust  
 [42:51] Dispensed 0.000024 mL of Base (0.5 M KOH)  
 [42:56] Stepping pH = 6.35  
 [42:56] Dispensed 0.000071 mL of Base (0.5 M KOH)  
 [43:01] Stepping pH = 6.95  
 [43:16] Stirrer speed set to 0  
 [44:16] Datapoint id 44 collected  
 [44:16] Charge balance equation is out by -77.9%  
 [44:16] Stirrer speed set to 55  
 [44:22] pH 7.16 -> 7.36  
 [44:22] Using cautious pH adjust  
 [44:22] Dispensed 0.000024 mL of Base (0.5 M KOH)  
 [44:27] Stepping pH = 7.21

Sample name: **M09\_octanol**  
Assay name: **pH-metric high logP**  
Assay ID: **18C-06007**  
Filename: **C:\Sirius\_T3\Mehtap\20180306\_exp30\_logP\_T3-2\18C-06007\_M09\_octanol\_pH-metric high logP.t3r**

Experiment start time: **3/6/2018 3:40:58 PM**  
Analyst: **Pion**  
Instrument ID: **T312060**

## Experiment Log (continued)

[44:27] Dispensed 0.000024 mL of Base (0.5 M KOH)  
[44:32] Stepping pH = 7.36  
[44:47] Stirrer speed set to 0  
[45:47] Datapoint id 45 collected  
[45:47] Charge balance equation is out by -160.1%  
[45:47] Stirrer speed set to 55  
[45:52] pH 7.07 -> 7.27  
[45:52] Using cautious pH adjust  
[45:52] Dispensed 0.000024 mL of Base (0.5 M KOH)  
[45:57] Stepping pH = 7.02  
[45:57] Dispensed 0.000071 mL of Base (0.5 M KOH)  
[46:02] Stepping pH = 7.98  
[46:17] Stirrer speed set to 0  
[47:17] Datapoint id 46 collected  
[47:17] Charge balance equation is out by -347.1%  
[47:17] Stirrer speed set to 55  
[47:23] pH 8.04 -> 8.24  
[47:23] Using cautious pH adjust  
[47:23] Dispensed 0.000024 mL of Base (0.5 M KOH)  
[47:28] Stepping pH = 8.03  
[47:28] Dispensed 0.000024 mL of Base (0.5 M KOH)  
[47:33] Stepping pH = 8.16  
[47:33] Dispensed 0.000024 mL of Base (0.5 M KOH)  
[47:38] Stepping pH = 8.35  
[47:53] Stirrer speed set to 0  
[48:53] Datapoint id 47 collected  
[48:53] Charge balance equation is out by -699.5%  
[48:53] Stirrer speed set to 55  
[48:58] pH 8.43 -> 8.63  
[48:58] Using cautious pH adjust  
[48:58] Dispensed 0.000024 mL of Base (0.5 M KOH)  
[49:03] Stepping pH = 8.46  
[49:03] Dispensed 0.000024 mL of Base (0.5 M KOH)  
[49:08] Stepping pH = 8.57  
[49:09] Dispensed 0.000024 mL of Base (0.5 M KOH)  
[49:14] Stepping pH = 8.69  
[49:29] Stirrer speed set to 0  
[50:12] Datapoint id 48 collected  
[50:12] Charge balance equation is out by -340.0%  
[50:12] Stirrer speed set to 55  
[50:17] pH 8.69 -> 8.89  
[50:17] Using cautious pH adjust  
[50:17] Dispensed 0.000024 mL of Base (0.5 M KOH)  
[50:22] Stepping pH = 8.69  
[50:22] Dispensed 0.000024 mL of Base (0.5 M KOH)  
[50:27] Stepping pH = 8.77  
[50:27] Dispensed 0.000024 mL of Base (0.5 M KOH)  
[50:32] Stepping pH = 8.86  
[50:32] Dispensed 0.000024 mL of Base (0.5 M KOH)  
[50:38] Stepping pH = 8.93  
[50:53] Stirrer speed set to 0  
[51:25] Datapoint id 49 collected  
[51:25] Charge balance equation is out by -371.7%  
[51:25] Stirrer speed set to 55  
[51:30] pH 8.95 -> 9.05  
[51:30] Using cautious pH adjust  
[51:30] Dispensed 0.000024 mL of Base (0.5 M KOH)  
[51:35] Stepping pH = 8.95  
[51:35] Dispensed 0.000024 mL of Base (0.5 M KOH)

Sample name: **M09\_octanol**  
Assay name: **pH-metric high logP**  
Assay ID: **18C-06007**  
Filename: **C:\Sirius\_T3\Mehtap\20180306\_exp30\_logP\_T3-2\18C-06007\_M09\_octanol\_pH-metric high logP.t3r**

Experiment start time: **3/6/2018 3:40:58 PM**  
Analyst: **Pion**  
Instrument ID: **T312060**

## Experiment Log (continued)

[51:40] Stepping pH = 8.96  
[51:40] Dispensed 0.000071 mL of Base (0.5 M KOH)  
[51:45] Stepping pH = 9.13  
[52:00] Stirrer speed set to 0  
[52:28] Datapoint id 50 collected  
[52:28] Charge balance equation is out by -530.3%  
[52:28] Titration 3 of 3  
[52:28] Adding initial titrants  
[52:28] Automatically add 0.10000 mL of Octanol  
[52:30] Dispensed 0.100000 mL of Octanol  
[52:30] Stirrer speed set to 10  
[52:31] Stirrer speed set to 60  
[52:31] Iterative adjust 9.13 -> 2.00  
[52:31] pH 9.13 -> 2.00  
[52:33] Dispensed 0.057314 mL of Acid (0.5 M HCl)  
[52:38] pH 2.03 -> 2.00  
[52:38] Dispensed 0.003387 mL of Acid (0.5 M HCl)  
[53:28] Stirrer speed set to 0  
[53:39] Datapoint id 51 collected  
[53:39] Stirrer speed set to 60  
[53:44] pH 1.97 -> 2.17  
[53:44] Using cautious pH adjust  
[53:44] Dispensed 0.009901 mL of Base (0.5 M KOH)  
[53:49] Stepping pH = 2.06  
[53:49] Dispensed 0.006914 mL of Base (0.5 M KOH)  
[53:54] Stepping pH = 2.14  
[53:55] Dispensed 0.001693 mL of Base (0.5 M KOH)  
[54:00] Stepping pH = 2.17  
[54:15] Stirrer speed set to 0  
[54:25] Datapoint id 52 collected  
[54:25] Charge balance equation is out by 6.5%  
[54:25] Stirrer speed set to 60  
[54:30] pH 2.17 -> 2.37  
[54:30] Using charge balance adjust  
[54:30] Dispensed 0.012535 mL of Base (0.5 M KOH)  
[54:50] Stirrer speed set to 0  
[55:00] Datapoint id 53 collected  
[55:00] Charge balance equation is out by 6.7%  
[55:00] Stirrer speed set to 60  
[55:06] pH 2.38 -> 2.58  
[55:06] Using charge balance adjust  
[55:06] Dispensed 0.007808 mL of Base (0.5 M KOH)  
[55:26] Stirrer speed set to 0  
[55:36] Datapoint id 54 collected  
[55:36] Charge balance equation is out by 10.7%  
[55:36] Stirrer speed set to 60  
[55:41] pH 2.61 -> 2.81  
[55:41] Using charge balance adjust  
[55:41] Dispensed 0.005009 mL of Base (0.5 M KOH)  
[56:02] Stirrer speed set to 0  
[56:12] Datapoint id 55 collected  
[56:12] Charge balance equation is out by 2.5%  
[56:12] Stirrer speed set to 60  
[56:17] pH 2.82 -> 3.02  
[56:17] Using charge balance adjust  
[56:17] Dispensed 0.003551 mL of Base (0.5 M KOH)  
[56:37] Stirrer speed set to 0  
[56:47] Datapoint id 56 collected  
[56:47] Charge balance equation is out by 13.2%

Sample name: **M09\_octanol**  
Assay name: **pH-metric high logP**  
Assay ID: **18C-06007**  
Filename: **C:\Sirius\_T3\Mehtap\20180306\_exp30\_logP\_T3-2\18C-06007\_M09\_octanol\_pH-metric high logP.t3r**

Experiment start time: **3/6/2018 3:40:58 PM**  
Analyst: **Pion**  
Instrument ID: **T312060**

## Experiment Log (continued)

[56:47] Stirrer speed set to 60  
[56:52] pH 3.05 -> 3.25  
[56:52] Using charge balance adjust  
[56:52] Dispensed 0.002634 mL of Base (0.5 M KOH)  
[57:13] Stirrer speed set to 0  
[57:23] Datapoint id 57 collected  
[57:23] Charge balance equation is out by 1.0%  
[57:23] Stirrer speed set to 60  
[57:28] pH 3.25 -> 3.45  
[57:28] Using charge balance adjust  
[57:28] Dispensed 0.002164 mL of Base (0.5 M KOH)  
[57:48] Stirrer speed set to 0  
[57:58] Datapoint id 58 collected  
[57:58] Charge balance equation is out by 5.5%  
[57:58] Stirrer speed set to 60  
[58:03] pH 3.46 -> 3.66  
[58:03] Using charge balance adjust  
[58:03] Dispensed 0.001764 mL of Base (0.5 M KOH)  
[58:24] Stirrer speed set to 0  
[58:34] Datapoint id 59 collected  
[58:34] Charge balance equation is out by 13.2%  
[58:34] Stirrer speed set to 60  
[58:39] pH 3.69 -> 3.89  
[58:39] Using charge balance adjust  
[58:39] Dispensed 0.001364 mL of Base (0.5 M KOH)  
[58:59] Stirrer speed set to 0  
[59:24] Datapoint id 60 collected  
[59:24] Charge balance equation is out by 0.3%  
[59:24] Stirrer speed set to 60  
[59:29] pH 3.90 -> 4.10  
[59:29] Using charge balance adjust  
[59:29] Dispensed 0.001011 mL of Base (0.5 M KOH)  
[59:49] Stirrer speed set to 0  
[59:59] Datapoint id 61 collected  
[59:59] Charge balance equation is out by -14.0%  
[59:59] Stirrer speed set to 60  
[1:00:05] pH 4.08 -> 4.28  
[1:00:05] Using charge balance adjust  
[1:00:05] Dispensed 0.000776 mL of Base (0.5 M KOH)  
[1:00:25] Stirrer speed set to 0  
[1:00:35] Datapoint id 62 collected  
[1:00:35] Charge balance equation is out by -23.3%  
[1:00:35] Stirrer speed set to 60  
[1:00:40] pH 4.24 -> 4.44  
[1:00:40] Using cautious pH adjust  
[1:00:41] Dispensed 0.000282 mL of Base (0.5 M KOH)  
[1:00:46] Stepping pH = 4.28  
[1:00:46] Dispensed 0.000447 mL of Base (0.5 M KOH)  
[1:00:51] Stepping pH = 4.41  
[1:00:51] Dispensed 0.000071 mL of Base (0.5 M KOH)  
[1:00:56] Stepping pH = 4.42  
[1:00:56] Dispensed 0.000165 mL of Base (0.5 M KOH)  
[1:01:01] Stepping pH = 4.46  
[1:01:16] Stirrer speed set to 0  
[1:01:27] Datapoint id 63 collected  
[1:01:27] Charge balance equation is out by -64.5%  
[1:01:27] Stirrer speed set to 60  
[1:01:32] pH 4.46 -> 4.66  
[1:01:32] Using cautious pH adjust

Sample name: **M09\_octanol**  
Assay name: **pH-metric high logP**  
Assay ID: **18C-06007**  
Filename: **C:\Sirius\_T3\Mehtap\20180306\_exp30\_logP\_T3-2\18C-06007\_M09\_octanol\_pH-metric high logP.t3r**

Experiment start time: **3/6/2018 3:40:58 PM**  
Analyst: **Pion**  
Instrument ID: **T312060**

## Experiment Log (continued)

[1:01:32] Dispensed 0.000188 mL of Base (0.5 M KOH)  
[1:01:37] Stepping pH = 4.52  
[1:01:37] Dispensed 0.000235 mL of Base (0.5 M KOH)  
[1:01:42] Stepping pH = 4.62  
[1:01:42] Dispensed 0.000071 mL of Base (0.5 M KOH)  
[1:01:47] Stepping pH = 4.63  
[1:01:47] Dispensed 0.000094 mL of Base (0.5 M KOH)  
[1:01:53] Stepping pH = 4.66  
[1:02:08] Stirrer speed set to 0  
[1:02:18] Datapoint id 64 collected  
[1:02:18] Charge balance equation is out by -59.0%  
[1:02:18] Stirrer speed set to 60  
[1:02:23] pH 4.67 -> 4.87  
[1:02:23] Using cautious pH adjust  
[1:02:23] Dispensed 0.000118 mL of Base (0.5 M KOH)  
[1:02:28] Stepping pH = 4.71  
[1:02:28] Dispensed 0.000188 mL of Base (0.5 M KOH)  
[1:02:34] Stepping pH = 4.84  
[1:02:34] Dispensed 0.000024 mL of Base (0.5 M KOH)  
[1:02:39] Stepping pH = 4.85  
[1:02:39] Dispensed 0.000047 mL of Base (0.5 M KOH)  
[1:02:44] Stepping pH = 4.86  
[1:02:59] Stirrer speed set to 0  
[1:03:10] Datapoint id 65 collected  
[1:03:10] Charge balance equation is out by -59.7%  
[1:03:10] Stirrer speed set to 60  
[1:03:15] pH 4.87 -> 5.07  
[1:03:15] Using cautious pH adjust  
[1:03:15] Dispensed 0.000071 mL of Base (0.5 M KOH)  
[1:03:20] Stepping pH = 4.88  
[1:03:20] Dispensed 0.000212 mL of Base (0.5 M KOH)  
[1:03:25] Stepping pH = 5.12  
[1:03:41] Stirrer speed set to 0  
[1:03:57] Datapoint id 66 collected  
[1:03:57] Charge balance equation is out by -86.7%  
[1:03:57] Stirrer speed set to 60  
[1:04:02] pH 5.14 -> 5.34  
[1:04:02] Using cautious pH adjust  
[1:04:02] Dispensed 0.000047 mL of Base (0.5 M KOH)  
[1:04:07] Stepping pH = 5.15  
[1:04:07] Dispensed 0.000141 mL of Base (0.5 M KOH)  
[1:04:12] Stepping pH = 5.43  
[1:04:27] Stirrer speed set to 0  
[1:04:48] Datapoint id 67 collected  
[1:04:48] Charge balance equation is out by -88.8%  
[1:04:48] Stirrer speed set to 60  
[1:04:53] pH 5.48 -> 5.68  
[1:04:53] Using cautious pH adjust  
[1:04:53] Dispensed 0.000024 mL of Base (0.5 M KOH)  
[1:04:59] Stepping pH = 5.49  
[1:04:59] Dispensed 0.000094 mL of Base (0.5 M KOH)  
[1:05:04] Stepping pH = 5.73  
[1:05:19] Stirrer speed set to 0  
[1:05:57] Datapoint id 68 collected  
[1:05:57] Charge balance equation is out by -92.7%  
[1:05:57] Stirrer speed set to 60  
[1:06:02] pH 5.81 -> 6.01  
[1:06:02] Using cautious pH adjust  
[1:06:02] Dispensed 0.000024 mL of Base (0.5 M KOH)

Sample name: **M09\_octanol**  
Assay name: **pH-metric high logP**  
Assay ID: **18C-06007**  
Filename: **C:\Sirius\_T3\Mehtap\20180306\_exp30\_logP\_T3-2\18C-06007\_M09\_octanol\_pH-metric high logP.t3r**

Experiment start time: **3/6/2018 3:40:58 PM**  
Analyst: **Pion**  
Instrument ID: **T312060**

## Experiment Log (continued)

[1:06:07] Stepping pH = 5.82  
[1:06:08] Dispensed 0.000071 mL of Base (0.5 M KOH)  
[1:06:13] Stepping pH = 6.20  
[1:06:28] Stirrer speed set to 0  
[1:07:18] Datapoint id 69 collected  
[1:07:18] Charge balance equation is out by -91.3%  
[1:07:18] Stirrer speed set to 60  
[1:07:23] pH 6.15 -> 6.35  
[1:07:23] Using cautious pH adjust  
[1:07:23] Dispensed 0.000024 mL of Base (0.5 M KOH)  
[1:07:29] Stepping pH = 6.11  
[1:07:29] Dispensed 0.000141 mL of Base (0.5 M KOH)  
[1:07:34] Stepping pH = 7.70  
[1:07:49] Stirrer speed set to 0  
[1:08:49] Datapoint id 70 collected  
[1:08:49] Charge balance equation is out by -243.1%  
[1:08:49] Stirrer speed set to 60  
[1:08:54] pH 7.85 -> 8.05  
[1:08:54] Using cautious pH adjust  
[1:08:54] Dispensed 0.000024 mL of Base (0.5 M KOH)  
[1:08:59] Stepping pH = 7.89  
[1:08:59] Dispensed 0.000024 mL of Base (0.5 M KOH)  
[1:09:04] Stepping pH = 7.95  
[1:09:04] Dispensed 0.000024 mL of Base (0.5 M KOH)  
[1:09:09] Stepping pH = 8.07  
[1:09:24] Stirrer speed set to 0  
[1:10:24] Datapoint id 71 collected  
[1:10:24] Charge balance equation is out by -683.0%  
[1:10:24] Stirrer speed set to 60  
[1:10:30] pH 8.14 -> 8.34  
[1:10:30] Using cautious pH adjust  
[1:10:30] Dispensed 0.000024 mL of Base (0.5 M KOH)  
[1:10:35] Stepping pH = 8.19  
[1:10:35] Dispensed 0.000024 mL of Base (0.5 M KOH)  
[1:10:40] Stepping pH = 8.32  
[1:10:40] Dispensed 0.000024 mL of Base (0.5 M KOH)  
[1:10:45] Stepping pH = 8.48  
[1:11:00] Stirrer speed set to 0  
[1:12:00] Datapoint id 72 collected  
[1:12:00] Charge balance equation is out by -550.4%  
[1:12:00] Stirrer speed set to 60  
[1:12:05] pH 8.50 -> 8.70  
[1:12:05] Using cautious pH adjust  
[1:12:05] Dispensed 0.000024 mL of Base (0.5 M KOH)  
[1:12:10] Stepping pH = 8.51  
[1:12:10] Dispensed 0.000024 mL of Base (0.5 M KOH)  
[1:12:15] Stepping pH = 8.60  
[1:12:15] Dispensed 0.000024 mL of Base (0.5 M KOH)  
[1:12:21] Stepping pH = 8.68  
[1:12:21] Dispensed 0.000024 mL of Base (0.5 M KOH)  
[1:12:26] Stepping pH = 8.77  
[1:12:41] Stirrer speed set to 0  
[1:13:09] Datapoint id 73 collected  
[1:13:09] Charge balance equation is out by -398.4%  
[1:13:09] Stirrer speed set to 60  
[1:13:14] pH 8.76 -> 8.96  
[1:13:14] Using cautious pH adjust  
[1:13:14] Dispensed 0.000024 mL of Base (0.5 M KOH)  
[1:13:19] Stepping pH = 8.75



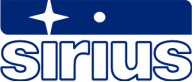

## Experiment Log

Sample name: **M09\_octanol**  
Assay name: **pH-metric high logP**  
Assay ID: **18C-06007**  
Filename: **C:\Sirius\_T3\Mehtap\20180306\_exp30\_logP\_T3-2\18C-06007\_M09\_octanol\_pH-metric high logP.t3r**

Experiment start time: **3/6/2018 3:40:58 PM**  
Analyst: **Pion**  
Instrument ID: **T312060**

### Experiment Log (continued)

[1:13:19] Dispensed 0.000071 mL of Base (0.5 M KOH)  
[1:13:24] Stepping pH = 8.87  
[1:13:24] Dispensed 0.000047 mL of Base (0.5 M KOH)  
[1:13:29] Stepping pH = 9.01  
[1:13:45] Stirrer speed set to 0  
[1:14:08] Datapoint id 74 collected  
[1:14:08] Charge balance equation is out by -368.3%  
[1:14:08] Argon flow rate set to 0  
[1:14:11] Titrator arm moved over Titration position
