# Supplementary material for: Octanol-water partition coefficient measurements for the SAMPL6 Blind Prediction Challenge
Source: bioRxiv or medRxiv preprint supplement (doi:10.1101/757393), 2019-12-02
Supplement: Supplementary file [file media-2.zip]

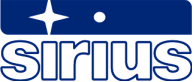

Sample name: **M15\_octanol**  
Assay name: **pH-metric high logP**  
Assay ID: **18C-03006**  
Filename: **C:\Sirius\_T3\Mehtap\20180302\_exp29\_logP\_T3-2\18C-03006\_M15\_octanol\_pH-metric high logP.t3r**

Experiment start time: **3/3/2018 8:26:22 AM**  
Analyst: **Pion**  
Instrument ID: **T312060**

**pH-metric Result**

logP (XH2 2+) -5.50  
logP (XH +) 0.28 ±0.16 (n=50)  
logP (neutral X) 2.04 ±0.02 (n=50)

**18C-03006 Points 1 to 32**

M15\_octanol concentration factor 0.894  
Carbonate 0.2191 mM  
Acidity error -0.25037 mM

**18C-03006 Points 33 to 65**

M15\_octanol concentration factor 0.950  
Carbonate 0.2177 mM  
Acidity error -0.29629 mM

**18C-03006 Points 66 to 99**

M15\_octanol concentration factor 1.015  
Carbonate 0.2265 mM  
Acidity error -0.47876 mM

**Warnings and errors**

Errors None  
Warnings One or more logP values out of range

**Sample logD and percent species**

| pH     | M15_octanol<br>logD | M15_octanol<br>M15_octanolH2 | M15_octanol<br>M15_octanolH | M15_octanol<br>M15_octanol | M15_octanol<br>M15_octanolH2* | M15_octanol<br>M15_octanolH* | M15_octanol<br>M15_octanol* | Comment       |
|--------|---------------------|------------------------------|-----------------------------|----------------------------|-------------------------------|------------------------------|-----------------------------|---------------|
| 1.000  | -1.31               | 92.86 %                      | 2.44 %                      | 0.00 %                     | 0.00 %                        | 4.68 %                       | 0.01 %                      | Stomach<br>pH |
| 1.200  | -1.11               | 89.13 %                      | 3.72 %                      | 0.00 %                     | 0.00 %                        | 7.12 %                       | 0.03 %                      |               |
| 2.000  | -0.39               | 56.12 %                      | 14.76 %                     | 0.01 %                     | 0.00 %                        | 28.29 %                      | 0.82 %                      |               |
| 3.000  | 0.25                | 9.86 %                       | 25.93 %                     | 0.13 %                     | 0.00 %                        | 49.68 %                      | 14.41 %                     | Blood pH      |
| 4.000  | 0.84                | 0.44 %                       | 11.68 %                     | 0.59 %                     | 0.00 %                        | 22.38 %                      | 64.91 %                     |               |
| 5.000  | 1.58                | 0.01 %                       | 1.70 %                      | 0.85 %                     | 0.00 %                        | 3.25 %                       | 94.20 %                     |               |
| 6.000  | 1.97                | 0.00 %                       | 0.18 %                      | 0.89 %                     | 0.00 %                        | 0.34 %                       | 98.59 %                     |               |
| 6.500  | 2.02                | 0.00 %                       | 0.06 %                      | 0.89 %                     | 0.00 %                        | 0.11 %                       | 98.94 %                     |               |
| 7.000  | 2.04                | 0.00 %                       | 0.02 %                      | 0.89 %                     | 0.00 %                        | 0.03 %                       | 99.05 %                     |               |
| 7.400  | 2.04                | 0.00 %                       | 0.01 %                      | 0.89 %                     | 0.00 %                        | 0.01 %                       | 99.09 %                     |               |
| 8.000  | 2.04                | 0.00 %                       | 0.00 %                      | 0.89 %                     | 0.00 %                        | 0.00 %                       | 99.10 %                     |               |
| 9.000  | 2.04                | 0.00 %                       | 0.00 %                      | 0.89 %                     | 0.00 %                        | 0.00 %                       | 99.11 %                     |               |
| 10.000 | 2.04                | 0.00 %                       | 0.00 %                      | 0.89 %                     | 0.00 %                        | 0.00 %                       | 99.11 %                     |               |
| 11.000 | 2.04                | 0.00 %                       | 0.00 %                      | 0.89 %                     | 0.00 %                        | 0.00 %                       | 99.11 %                     |               |
| 12.000 | 2.04                | 0.00 %                       | 0.00 %                      | 0.89 %                     | 0.00 %                        | 0.00 %                       | 99.11 %                     |               |

Sample name: **M15\_octanol**  
 Assay name: **pH-metric high logP**  
 Assay ID: **18C-03006**  
 Filename: **C:\Sirius\_T3\Mehtap\20180302\_exp29\_logP\_T3-2\18C-03006\_M15\_octanol\_pH-metric high logP.t3r**

Experiment start time: **3/3/2018 8:26:22 AM**  
 Analyst: **Pion**  
 Instrument ID: **T312060**

## Graphs

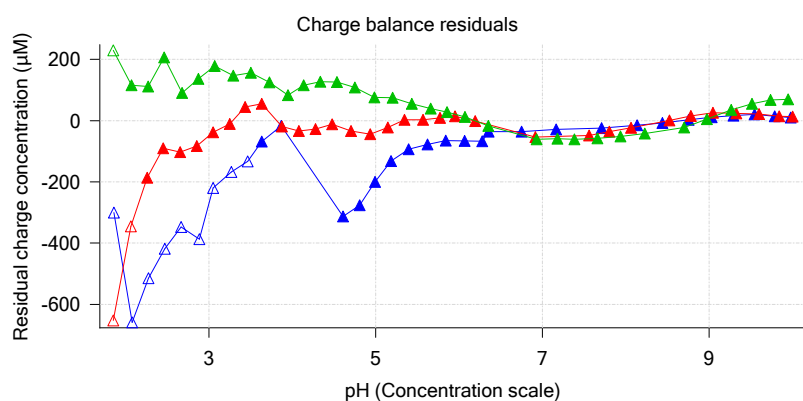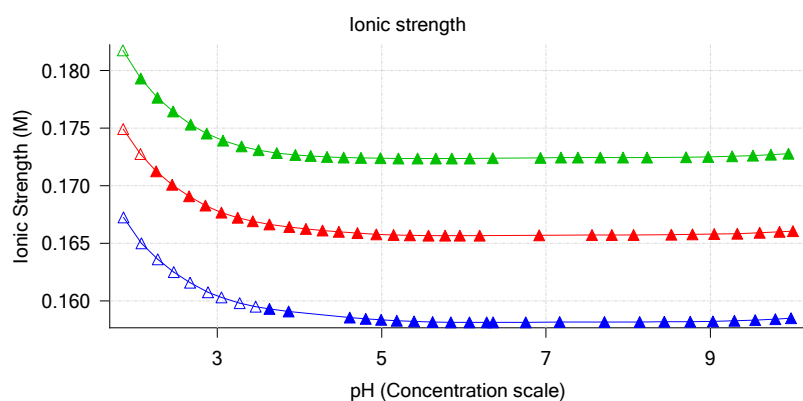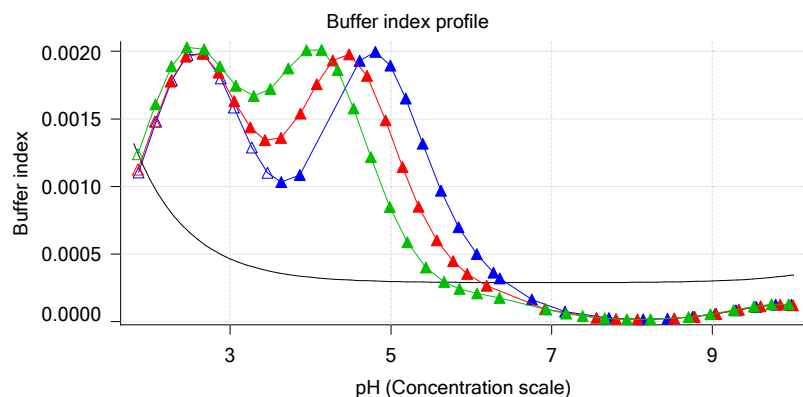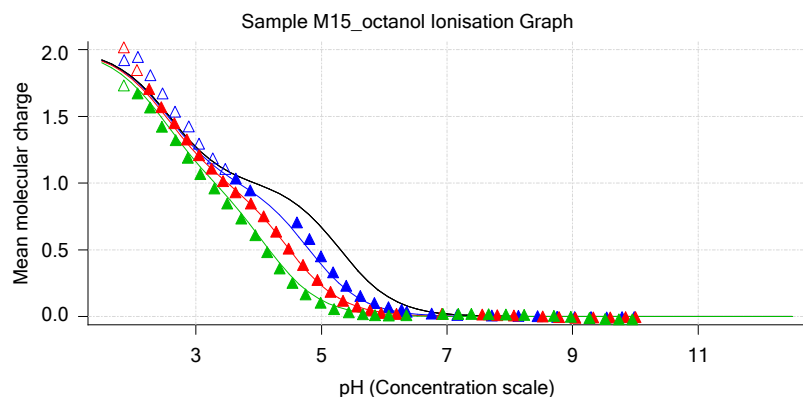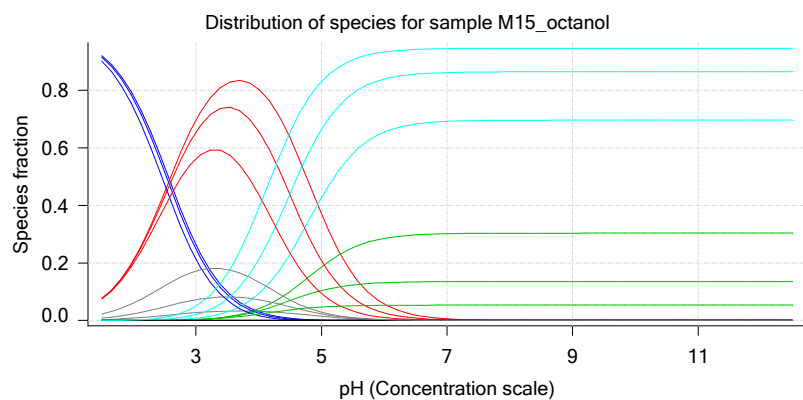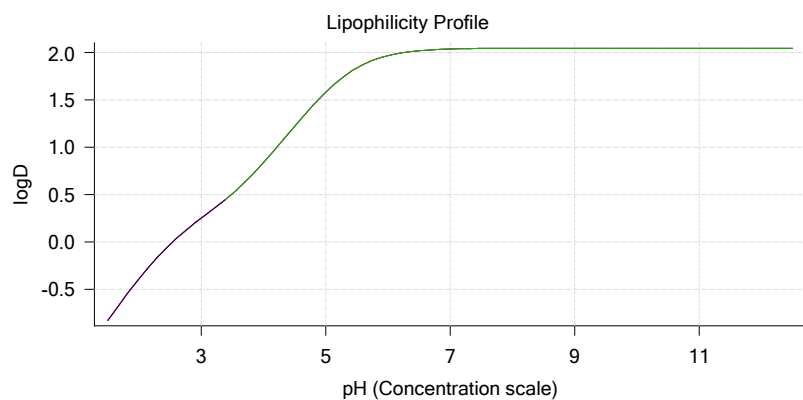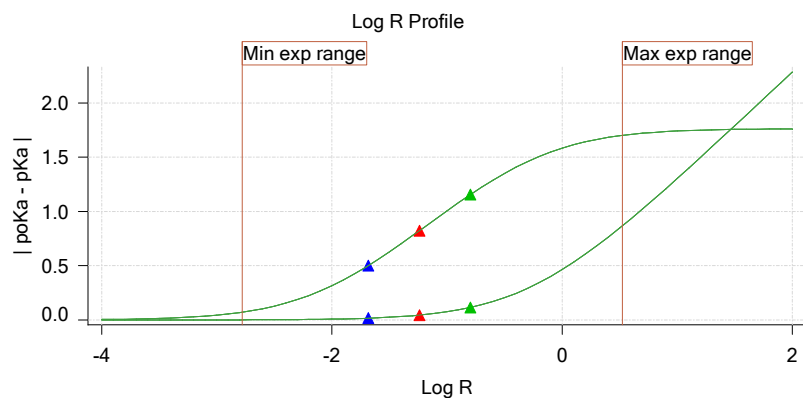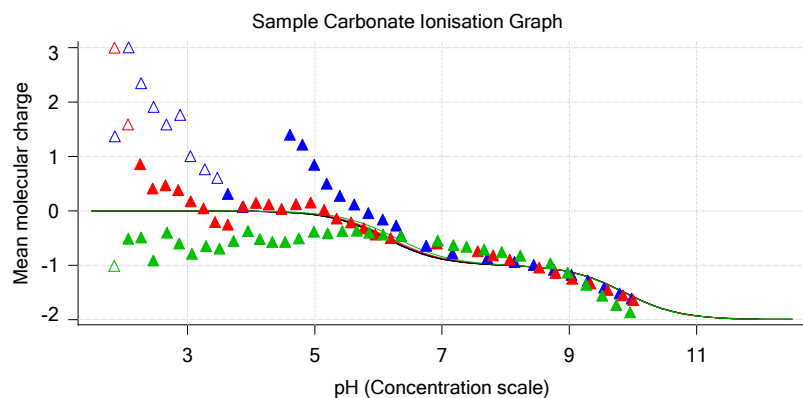

Sample name: **M15\_octanol**  
 Assay name: **pH-metric high logP**  
 Assay ID: **18C-03006**  
 Filename: **C:\Sirius\_T3\Mehtap\20180302\_exp29\_logP\_T3-2\18C-03006\_M15\_octanol\_pH-metric high logP.t3r**

Experiment start time: **3/3/2018 8:26:22 AM**  
 Analyst: **Pion**  
 Instrument ID: **T312060**

## Graphs (continued)

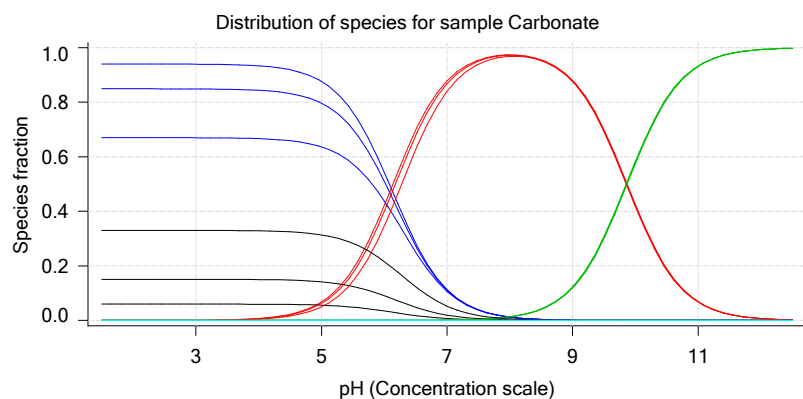

Sample name: **M15\_octanol**  
 Assay name: **pH-metric high logP**  
 Assay ID: **18C-03006**  
 Filename: **C:\Sirius\_T3\Mehtap\20180302\_exp29\_logP\_T3-2\18C-03006\_M15\_octanol\_pH-metric high logP.t3r**

Experiment start time: **3/3/2018 8:26:22 AM**  
 Analyst: **Pion**  
 Instrument ID: **T312060**

## pH-metric high logP Titration 1 of 3 18C-03006 Points 1 to 32

### Overall results

RMSD 0.221  
 Average ionic strength 0.158 M  
 Average temperature 25.0°C  
 Partition ratio 0.0207 : 1  
 Analyte concentration range 3659.4 µM to 3810.2 µM  
 Total points considered 23 of 32

### Warnings and errors

Errors None  
 Warnings One or more logP values out of range

### Four-Plus parameters

Alpha 0.111 3/3/2018 8:26:22 AM C:\Sirius\_T3\HCl18C02.t3r  
 S 0.9988 3/3/2018 8:26:22 AM C:\Sirius\_T3\HCl18C02.t3r  
 jH 1.0 3/3/2018 8:26:22 AM C:\Sirius\_T3\HCl18C02.t3r  
 jOH -0.8 3/3/2018 8:26:22 AM C:\Sirius\_T3\HCl18C02.t3r

### Titrants

0.50 M HCl 0.999058 3/3/2018 8:26:22 AM C:\Sirius\_T3\HCl18C02.t3r  
 0.50 M KOH 0.999845 3/3/2018 8:26:22 AM C:\Sirius\_T3\KOH18B27.t3r

### Sample

M15\_octanol concentration factor 0.894  
 Base pKa 1 2.58  
 Base pKa 2 5.30  
 logP (XH2 2+) -5.50  
 logP (XH +) -2.63  
 logP (neutral X) 1.84

### Sample graphs

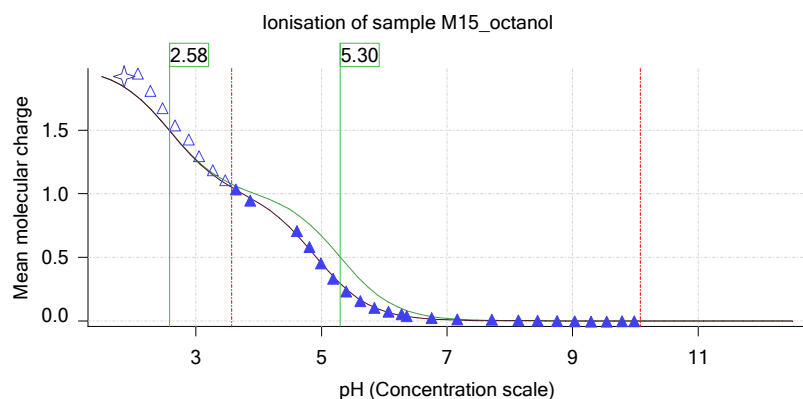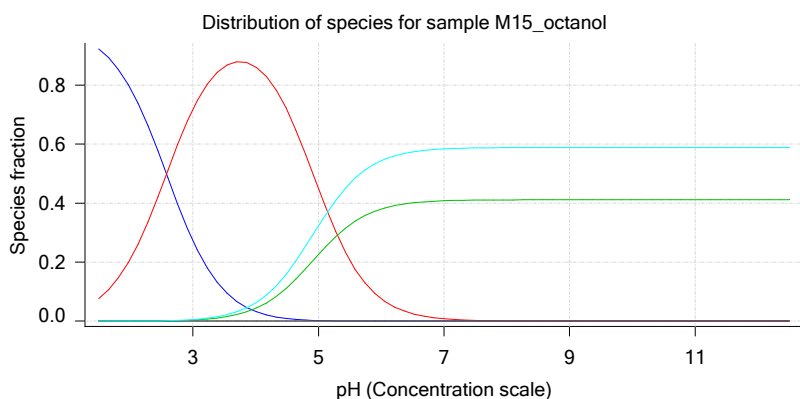

Sample name: **M15\_octanol**  
Assay name: **pH-metric high logP**  
Assay ID: **18C-03006**  
Filename: **C:\Sirius\_T3\Mehtap\20180302\_exp29\_logP\_T3-2\18C-03006\_M15\_octanol\_pH-metric high logP.t3r**

Experiment start time: **3/3/2018 8:26:22 AM**  
Analyst: **Pion**  
Instrument ID: **T312060**

## Sample graphs (continued)

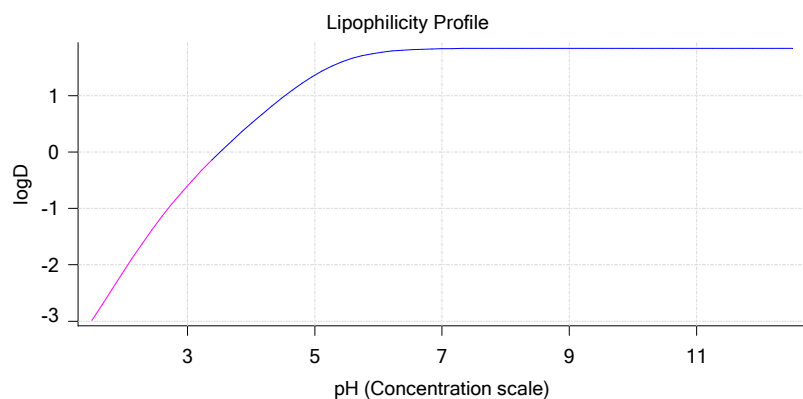

## Sample logD and percent species

| pH     | M15_octanol<br>logD | M15_octanol<br>M15_octanolH2 | M15_octanol<br>M15_octanolH | M15_octanol<br>M15_octanol | M15_octanol<br>M15_octanolH2* | M15_octanol<br>M15_octanolH* | M15_octanol<br>M15_octanol* | Comment       |
|--------|---------------------|------------------------------|-----------------------------|----------------------------|-------------------------------|------------------------------|-----------------------------|---------------|
| 1.000  | -3.82               | 97.44 %                      | 2.56 %                      | 0.00 %                     | 0.00 %                        | 0.00 %                       | 0.00 %                      | Stomach<br>pH |
| 1.200  | -3.50               | 96.00 %                      | 4.00 %                      | 0.00 %                     | 0.00 %                        | 0.00 %                       | 0.00 %                      |               |
| 2.000  | -2.11               | 79.15 %                      | 20.82 %                     | 0.01 %                     | 0.00 %                        | 0.00 %                       | 0.01 %                      |               |
| 3.000  | -0.60               | 27.30 %                      | 71.82 %                     | 0.36 %                     | 0.00 %                        | 0.00 %                       | 0.52 %                      | Blood pH      |
| 4.000  | 0.50                | 3.28 %                       | 86.21 %                     | 4.32 %                     | 0.00 %                        | 0.00 %                       | 6.18 %                      |               |
| 5.000  | 1.36                | 0.17 %                       | 45.00 %                     | 22.55 %                    | 0.00 %                        | 0.00 %                       | 32.28 %                     |               |
| 6.000  | 1.76                | 0.00 %                       | 7.58 %                      | 38.01 %                    | 0.00 %                        | 0.00 %                       | 54.40 %                     |               |
| 6.500  | 1.81                | 0.00 %                       | 2.53 %                      | 40.09 %                    | 0.00 %                        | 0.00 %                       | 57.38 %                     |               |
| 7.000  | 1.83                | 0.00 %                       | 0.81 %                      | 40.80 %                    | 0.00 %                        | 0.00 %                       | 58.39 %                     |               |
| 7.400  | 1.84                | 0.00 %                       | 0.33 %                      | 41.00 %                    | 0.00 %                        | 0.00 %                       | 58.68 %                     |               |
| 8.000  | 1.84                | 0.00 %                       | 0.08 %                      | 41.10 %                    | 0.00 %                        | 0.00 %                       | 58.82 %                     |               |
| 9.000  | 1.84                | 0.00 %                       | 0.01 %                      | 41.13 %                    | 0.00 %                        | 0.00 %                       | 58.86 %                     |               |
| 10.000 | 1.84                | 0.00 %                       | 0.00 %                      | 41.13 %                    | 0.00 %                        | 0.00 %                       | 58.87 %                     |               |
| 11.000 | 1.84                | 0.00 %                       | 0.00 %                      | 41.13 %                    | 0.00 %                        | 0.00 %                       | 58.87 %                     |               |
| 12.000 | 1.84                | 0.00 %                       | 0.00 %                      | 41.13 %                    | 0.00 %                        | 0.00 %                       | 58.87 %                     |               |

## Carbonate and acidity

Carbonate 0.219 mM  
Acidity error -0.250 mM

## Other graphs

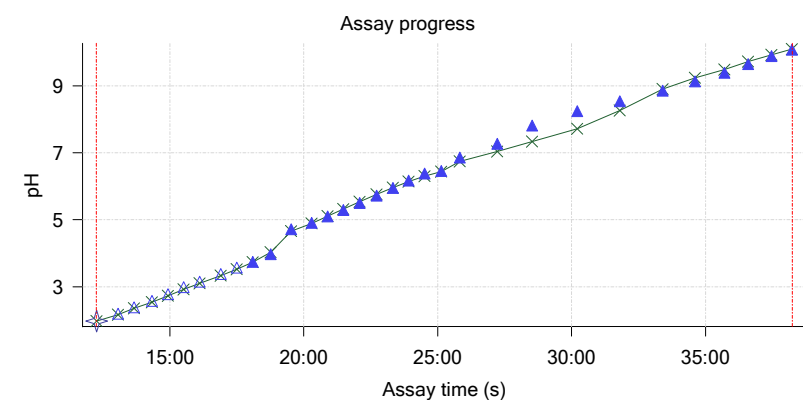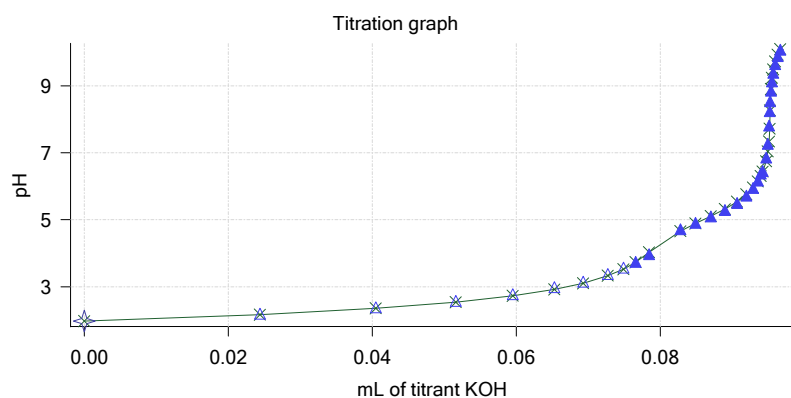

Sample name: **M15\_octanol**  
 Assay name: **pH-metric high logP**  
 Assay ID: **18C-03006**  
 Filename: **C:\Sirius\_T3\Mehtap\20180302\_exp29\_logP\_T3-2\18C-03006\_M15\_octanol\_pH-metric high logP.t3r**

Experiment start time: **3/3/2018 8:26:22 AM**  
 Analyst: **Pion**  
 Instrument ID: **T312060**

## Other graphs (continued)

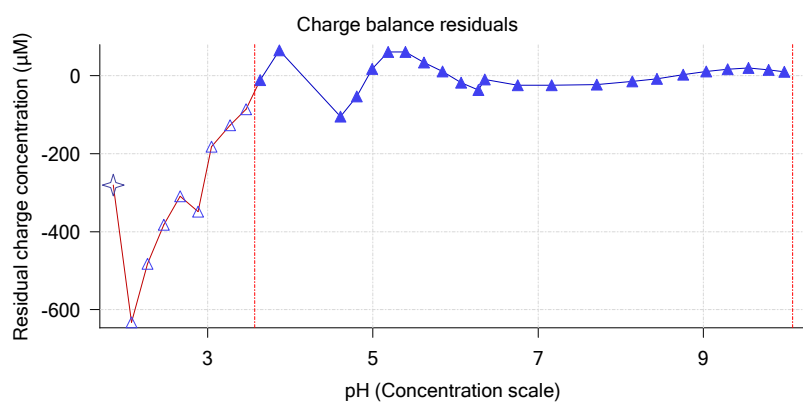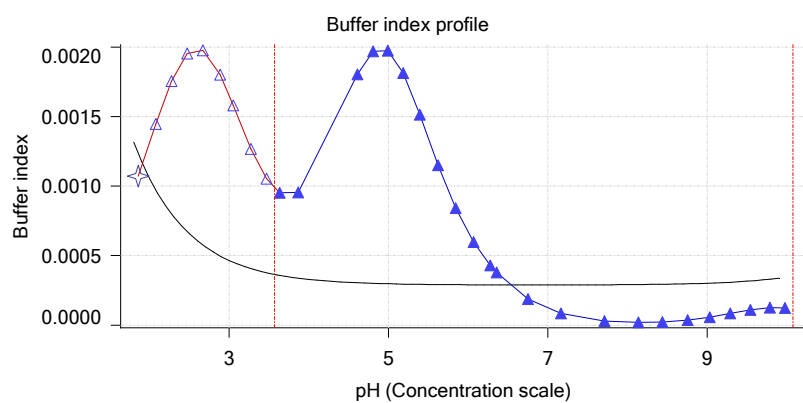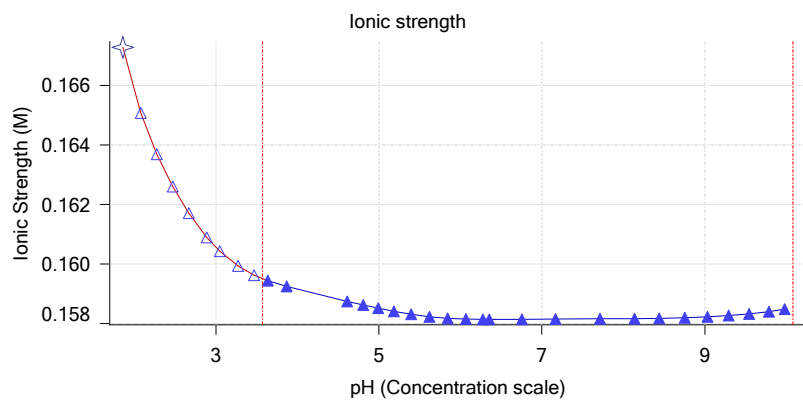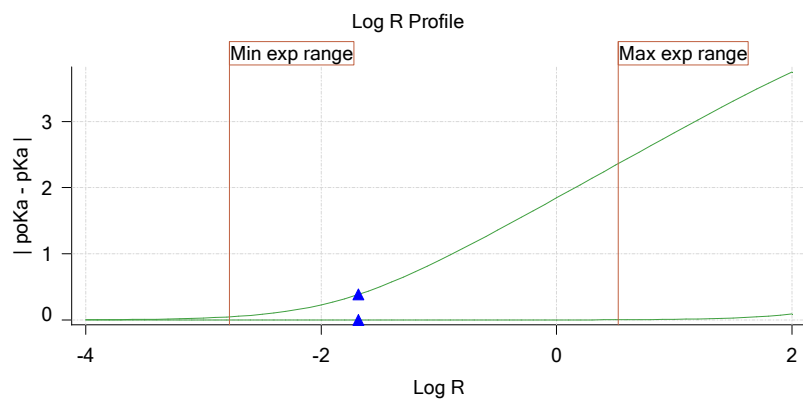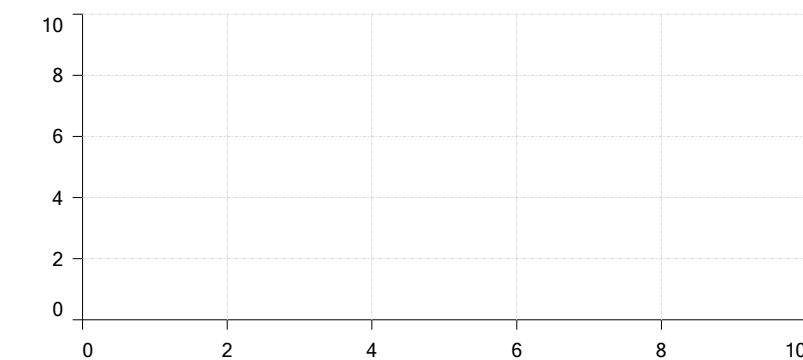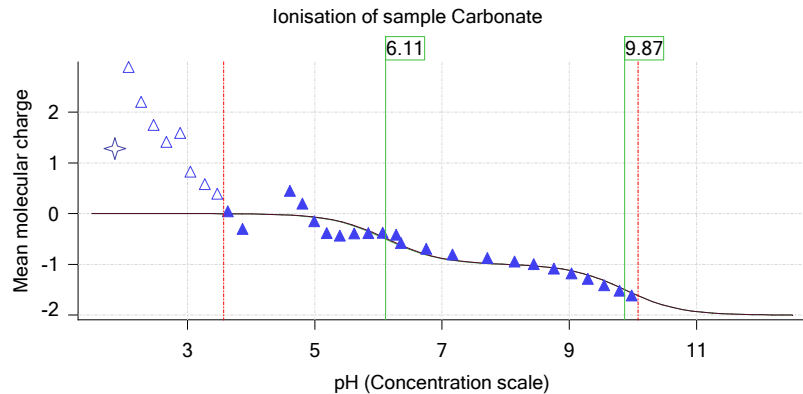

Sample name: **M15\_octanol**  
 Assay name: **pH-metric high logP**  
 Assay ID: **18C-03006**  
 Filename: **C:\Sirius\_T3\Mehtap\20180302\_exp29\_logP\_T3-2\18C-03006\_M15\_octanol\_pH-metric high logP.t3r**

Experiment start time: **3/3/2018 8:26:22 AM**  
 Analyst: **Pion**  
 Instrument ID: **T312060**

## pH-metric high logP Titration 2 of 3 18C-03006 Points 33 to 65

### Overall results

RMSD 0.481  
 Average ionic strength 0.167 M  
 Average temperature 25.0°C  
 Partition ratio 0.0576 : 1  
 Analyte concentration range 3242.7 µM to 3373.5 µM  
 Total points considered 31 of 33

### Warnings and errors

Errors None  
 Warnings One or more logP values out of range

### Four-Plus parameters

Alpha 0.111 3/3/2018 8:26:22 AM C:\Sirius\_T3\HCl18C02.t3r  
 S 0.9988 3/3/2018 8:26:22 AM C:\Sirius\_T3\HCl18C02.t3r  
 jH 1.0 3/3/2018 8:26:22 AM C:\Sirius\_T3\HCl18C02.t3r  
 jOH -0.8 3/3/2018 8:26:22 AM C:\Sirius\_T3\HCl18C02.t3r

### Titrants

0.50 M HCl 0.999058 3/3/2018 8:26:22 AM C:\Sirius\_T3\HCl18C02.t3r  
 0.50 M KOH 0.999845 3/3/2018 8:26:22 AM C:\Sirius\_T3\KOH18B27.t3r

### Sample

M15\_octanol concentration factor 0.950  
 Base pKa 1 2.58  
 Base pKa 2 5.30  
 logP (XH2 2+) -5.50  
 logP (XH +) -2.46  
 logP (neutral X) 1.99

### Sample graphs

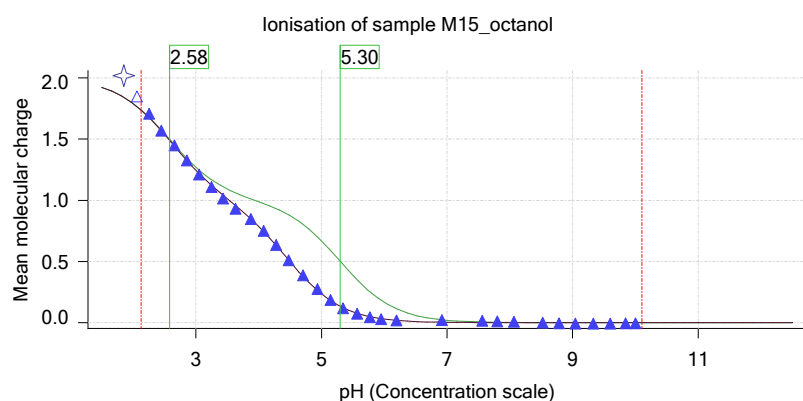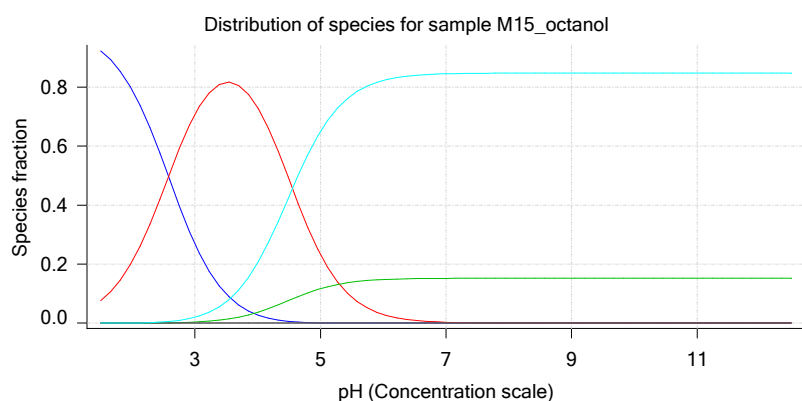

Sample name: **M15\_octanol**  
Assay name: **pH-metric high logP**  
Assay ID: **18C-03006**  
Filename: **C:\Sirius\_T3\Mehtap\20180302\_exp29\_logP\_T3-2\18C-03006\_M15\_octanol\_pH-metric high logP.t3r**

Experiment start time: **3/3/2018 8:26:22 AM**  
Analyst: **Pion**  
Instrument ID: **T312060**

## Sample graphs (continued)

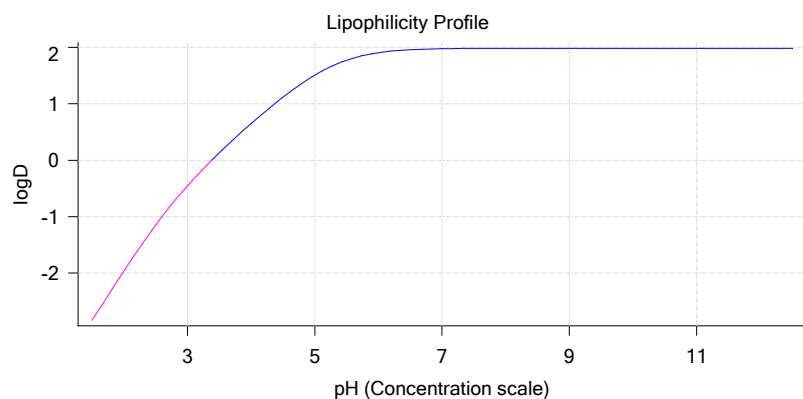

## Sample logD and percent species

| pH     | M15_octanol<br>logD | M15_octanol<br>M15_octanolH2 | M15_octanol<br>M15_octanolH | M15_octanol<br>M15_octanol | M15_octanol<br>M15_octanolH2* | M15_octanol<br>M15_octanolH* | M15_octanol<br>M15_octanol* | Comment       |
|--------|---------------------|------------------------------|-----------------------------|----------------------------|-------------------------------|------------------------------|-----------------------------|---------------|
| 1.000  | -3.66               | 97.44 %                      | 2.56 %                      | 0.00 %                     | 0.00 %                        | 0.00 %                       | 0.00 %                      | Stomach<br>pH |
| 1.200  | -3.35               | 96.00 %                      | 4.00 %                      | 0.00 %                     | 0.00 %                        | 0.00 %                       | 0.00 %                      |               |
| 2.000  | -1.97               | 79.12 %                      | 20.81 %                     | 0.01 %                     | 0.00 %                        | 0.00 %                       | 0.06 %                      |               |
| 3.000  | -0.45               | 26.90 %                      | 70.76 %                     | 0.35 %                     | 0.00 %                        | 0.01 %                       | 1.97 %                      | Blood pH      |
| 4.000  | 0.65                | 2.78 %                       | 73.13 %                     | 3.67 %                     | 0.00 %                        | 0.01 %                       | 20.41 %                     |               |
| 5.000  | 1.51                | 0.09 %                       | 23.28 %                     | 11.67 %                    | 0.00 %                        | 0.00 %                       | 64.96 %                     |               |
| 6.000  | 1.91                | 0.00 %                       | 2.95 %                      | 14.77 %                    | 0.00 %                        | 0.00 %                       | 82.28 %                     |               |
| 6.500  | 1.96                | 0.00 %                       | 0.95 %                      | 15.08 %                    | 0.00 %                        | 0.00 %                       | 83.97 %                     |               |
| 7.000  | 1.98                | 0.00 %                       | 0.30 %                      | 15.18 %                    | 0.00 %                        | 0.00 %                       | 84.52 %                     |               |
| 7.400  | 1.98                | 0.00 %                       | 0.12 %                      | 15.21 %                    | 0.00 %                        | 0.00 %                       | 84.67 %                     |               |
| 8.000  | 1.98                | 0.00 %                       | 0.03 %                      | 15.22 %                    | 0.00 %                        | 0.00 %                       | 84.75 %                     |               |
| 9.000  | 1.99                | 0.00 %                       | 0.00 %                      | 15.22 %                    | 0.00 %                        | 0.00 %                       | 84.77 %                     |               |
| 10.000 | 1.99                | 0.00 %                       | 0.00 %                      | 15.22 %                    | 0.00 %                        | 0.00 %                       | 84.78 %                     |               |
| 11.000 | 1.99                | 0.00 %                       | 0.00 %                      | 15.22 %                    | 0.00 %                        | 0.00 %                       | 84.78 %                     |               |
| 12.000 | 1.99                | 0.00 %                       | 0.00 %                      | 15.22 %                    | 0.00 %                        | 0.00 %                       | 84.78 %                     |               |

## Carbonate and acidity

Carbonate 0.218 mM  
Acidity error -0.296 mM

## Other graphs

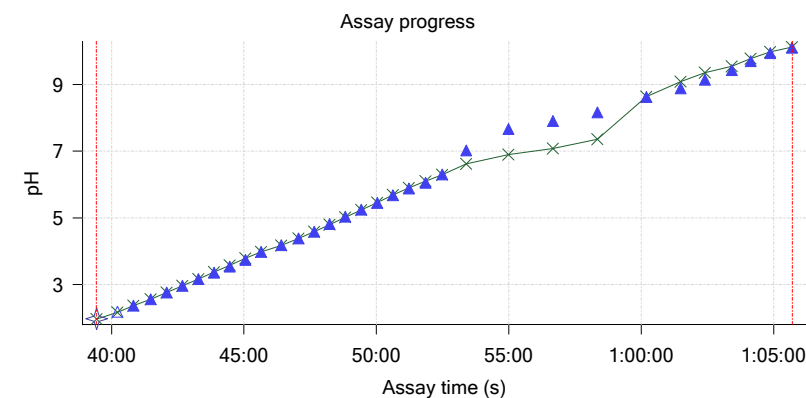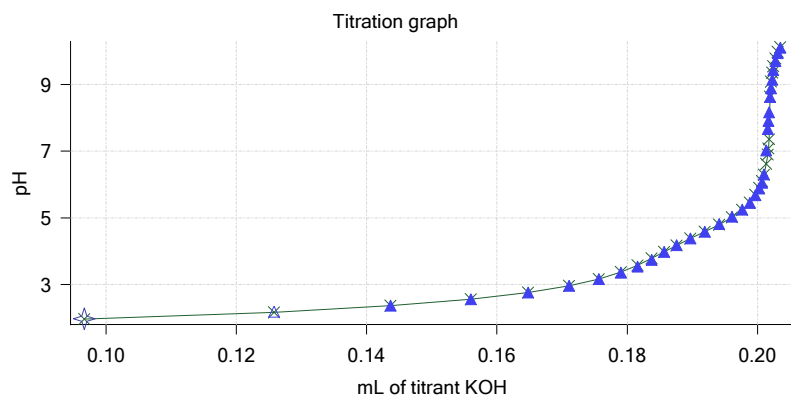



Sample name: **M15\_octanol**  
 Assay name: **pH-metric high logP**  
 Assay ID: **18C-03006**  
 Filename: **C:\Sirius\_T3\Mehtap\20180302\_exp29\_logP\_T3-2\18C-03006\_M15\_octanol\_pH-metric high logP.t3r**

Experiment start time: **3/3/2018 8:26:22 AM**  
 Analyst: **Pion**  
 Instrument ID: **T312060**

## Other graphs (continued)

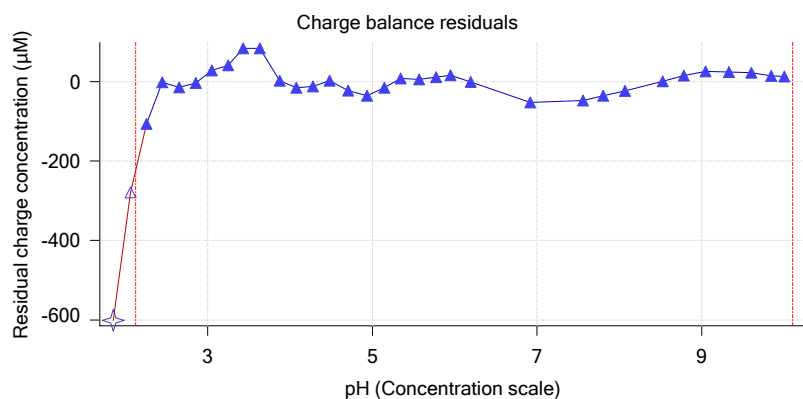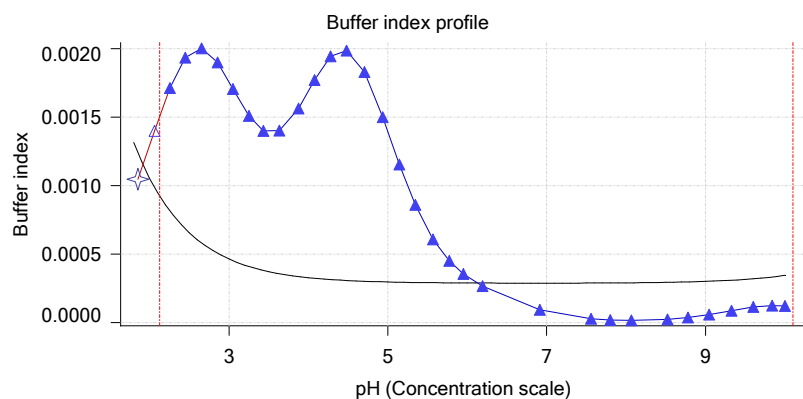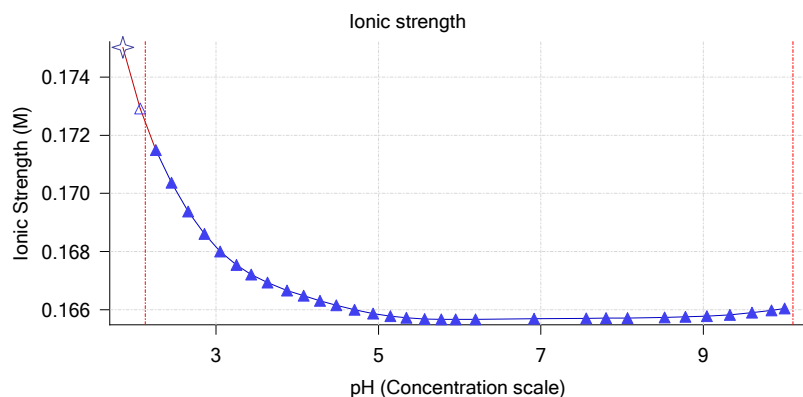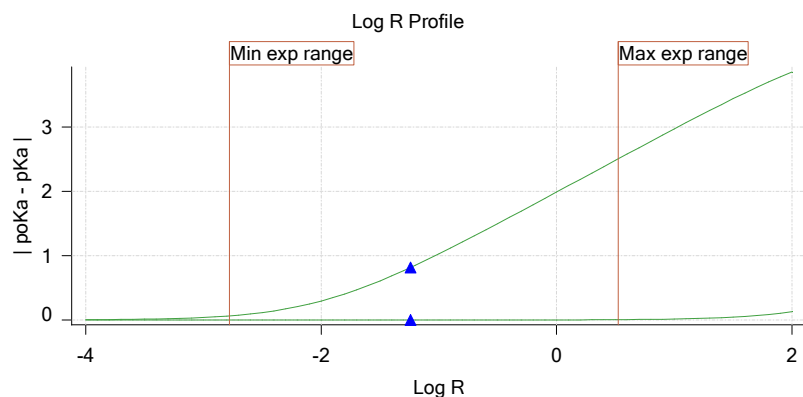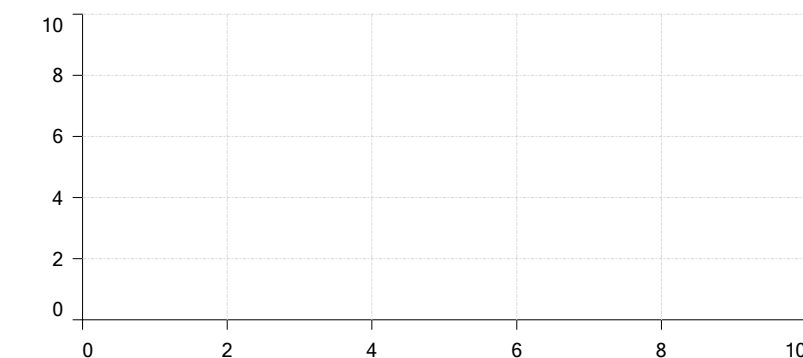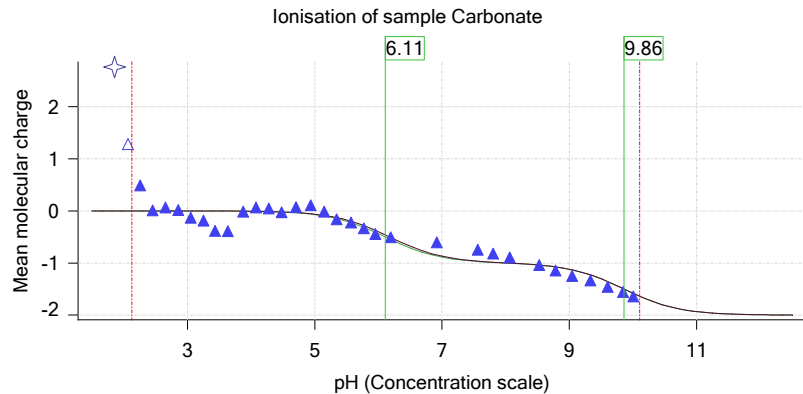

Sample name: **M15\_octanol**  
 Assay name: **pH-metric high logP**  
 Assay ID: **18C-03006**  
 Filename: **C:\Sirius\_T3\Mehtap\20180302\_exp29\_logP\_T3-2\18C-03006\_M15\_octanol\_pH-metric high logP.t3r**

Experiment start time: **3/3/2018 8:26:22 AM**  
 Analyst: **Pion**  
 Instrument ID: **T312060**

pH-metric high logP Titration 3 of 3 18C-03006 Points 66 to 99

## Overall results

RMSD 0.728  
 Average ionic strength 0.173 M  
 Average temperature 25.0°C  
 Partition ratio 0.1596 : 1  
 Analyte concentration range 2725.9 µM to 2821.3 µM  
 Total points considered 33 of 34

## Warnings and errors

Errors None  
 Warnings One or more logP values out of range

## Four-Plus parameters

Alpha 0.111 3/3/2018 8:26:22 AM C:\Sirius\_T3\HCl18C02.t3r  
 S 0.9988 3/3/2018 8:26:22 AM C:\Sirius\_T3\HCl18C02.t3r  
 jH 1.0 3/3/2018 8:26:22 AM C:\Sirius\_T3\HCl18C02.t3r  
 jOH -0.8 3/3/2018 8:26:22 AM C:\Sirius\_T3\HCl18C02.t3r

## Titrants

0.50 M HCl 0.999058 3/3/2018 8:26:22 AM C:\Sirius\_T3\HCl18C02.t3r  
 0.50 M KOH 0.999845 3/3/2018 8:26:22 AM C:\Sirius\_T3\KOH18B27.t3r

## Sample

M15\_octanol concentration factor 1.015  
 Base pKa 1 2.58  
 Base pKa 2 5.30  
 logP (XH2 2+) -5.50  
 logP (XH +) 0.54  
 logP (neutral X) 2.20

## Sample graphs

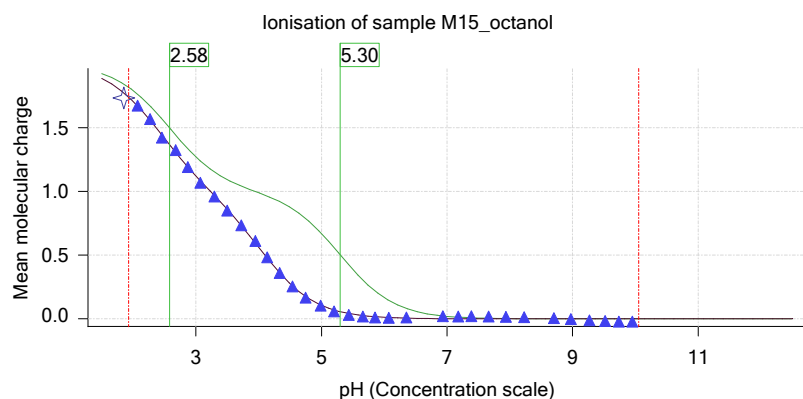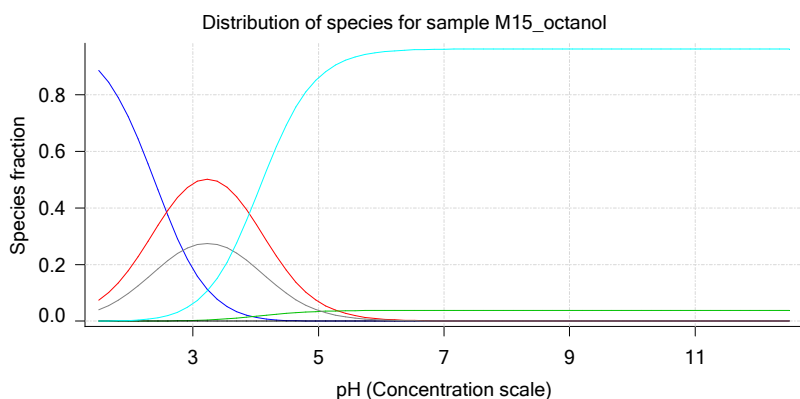

Sample name: **M15\_octanol**  
Assay name: **pH-metric high logP**  
Assay ID: **18C-03006**  
Filename: **C:\Sirius\_T3\Mehtap\20180302\_exp29\_logP\_T3-2\18C-03006\_M15\_octanol\_pH-metric high logP.t3r**

Experiment start time: **3/3/2018 8:26:22 AM**  
Analyst: **Pion**  
Instrument ID: **T312060**

## Sample graphs (continued)

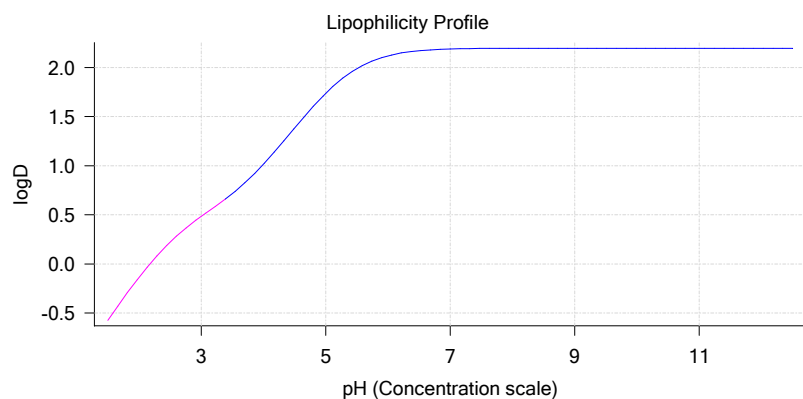

## Sample logD and percent species

| pH     | M15_octanol<br>logD | M15_octanol<br>M15_octanolH2 | M15_octanol<br>M15_octanolH | M15_octanol<br>M15_octanol | M15_octanol<br>M15_octanolH2* | M15_octanol<br>M15_octanolH* | M15_octanol<br>M15_octanol* | Comment       |
|--------|---------------------|------------------------------|-----------------------------|----------------------------|-------------------------------|------------------------------|-----------------------------|---------------|
| 1.000  | -1.05               | 96.09 %                      | 2.53 %                      | 0.00 %                     | 0.00 %                        | 1.38 %                       | 0.00 %                      | Stomach<br>pH |
| 1.200  | -0.86               | 93.93 %                      | 3.92 %                      | 0.00 %                     | 0.00 %                        | 2.14 %                       | 0.01 %                      |               |
| 2.000  | -0.14               | 70.90 %                      | 18.65 %                     | 0.01 %                     | 0.00 %                        | 10.21 %                      | 0.23 %                      |               |
| 3.000  | 0.48                | 18.47 %                      | 48.58 %                     | 0.24 %                     | 0.00 %                        | 26.59 %                      | 6.11 %                      | Blood pH      |
| 4.000  | 1.02                | 1.31 %                       | 34.56 %                     | 1.73 %                     | 0.00 %                        | 18.91 %                      | 43.49 %                     |               |
| 5.000  | 1.74                | 0.03 %                       | 6.83 %                      | 3.42 %                     | 0.00 %                        | 3.74 %                       | 85.98 %                     |               |
| 6.000  | 2.12                | 0.00 %                       | 0.76 %                      | 3.79 %                     | 0.00 %                        | 0.41 %                       | 95.05 %                     |               |
| 6.500  | 2.17                | 0.00 %                       | 0.24 %                      | 3.82 %                     | 0.00 %                        | 0.13 %                       | 95.81 %                     |               |
| 7.000  | 2.19                | 0.00 %                       | 0.08 %                      | 3.83 %                     | 0.00 %                        | 0.04 %                       | 96.06 %                     |               |
| 7.400  | 2.19                | 0.00 %                       | 0.03 %                      | 3.83 %                     | 0.00 %                        | 0.02 %                       | 96.12 %                     |               |
| 8.000  | 2.20                | 0.00 %                       | 0.01 %                      | 3.83 %                     | 0.00 %                        | 0.00 %                       | 96.16 %                     |               |
| 9.000  | 2.20                | 0.00 %                       | 0.00 %                      | 3.83 %                     | 0.00 %                        | 0.00 %                       | 96.17 %                     |               |
| 10.000 | 2.20                | 0.00 %                       | 0.00 %                      | 3.83 %                     | 0.00 %                        | 0.00 %                       | 96.17 %                     |               |
| 11.000 | 2.20                | 0.00 %                       | 0.00 %                      | 3.83 %                     | 0.00 %                        | 0.00 %                       | 96.17 %                     |               |
| 12.000 | 2.20                | 0.00 %                       | 0.00 %                      | 3.83 %                     | 0.00 %                        | 0.00 %                       | 96.17 %                     |               |

## Carbonate and acidity

Carbonate 0.227 mM  
Acidity error -0.479 mM

## Other graphs

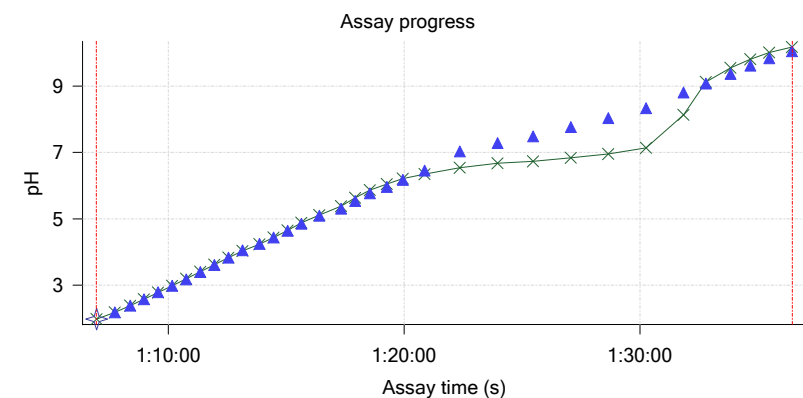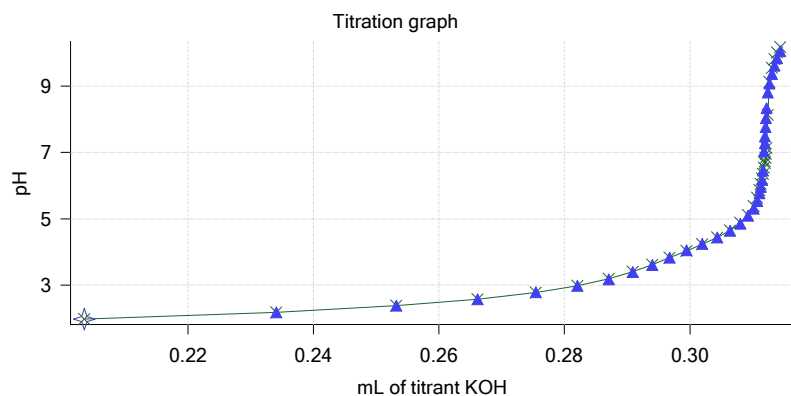

Sample name: **M15\_octanol**  
 Assay name: **pH-metric high logP**  
 Assay ID: **18C-03006**  
 Filename: **C:\Sirius\_T3\Mehtap\20180302\_exp29\_logP\_T3-2\18C-03006\_M15\_octanol\_pH-metric high logP.t3r**

Experiment start time: **3/3/2018 8:26:22 AM**  
 Analyst: **Pion**  
 Instrument ID: **T312060**

## Other graphs (continued)

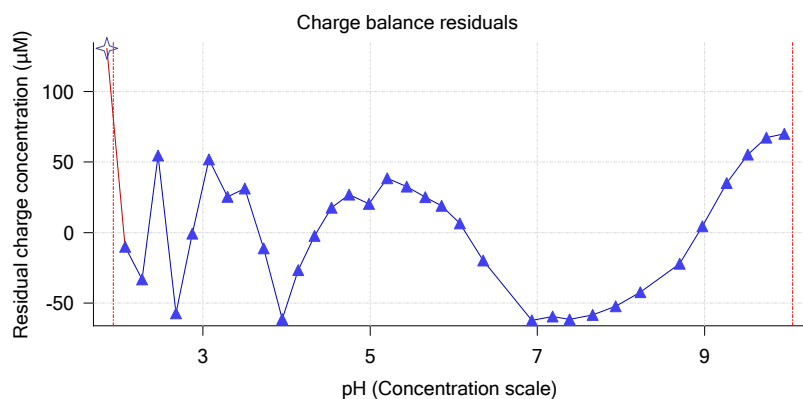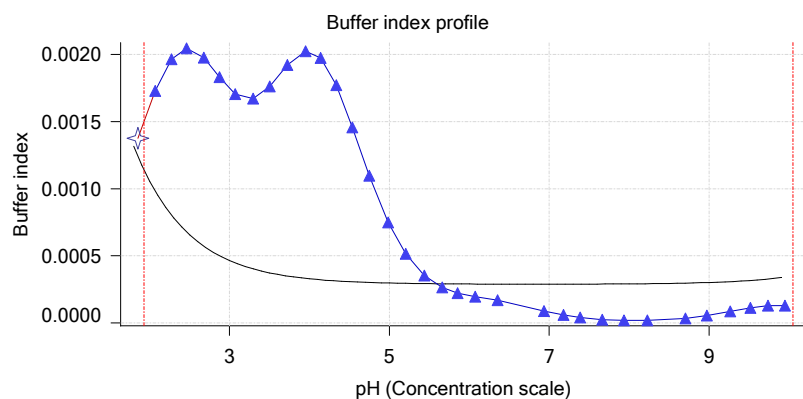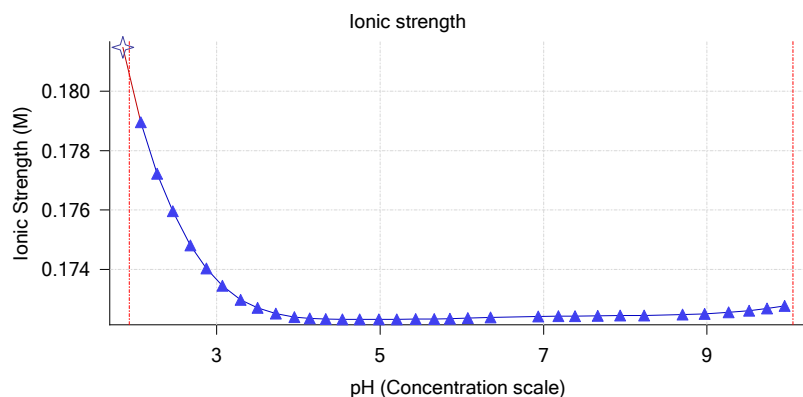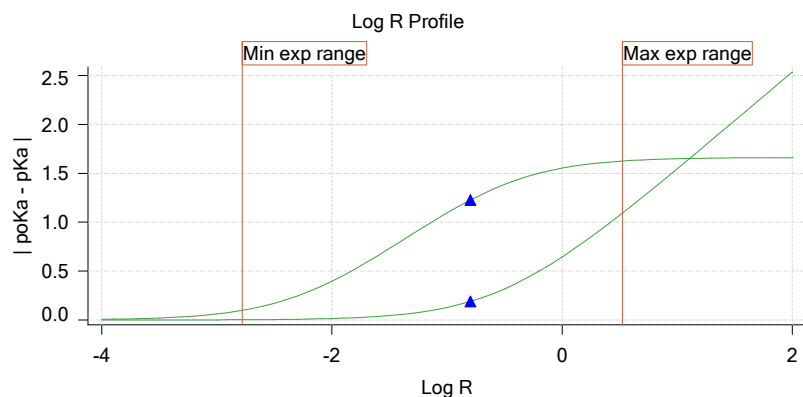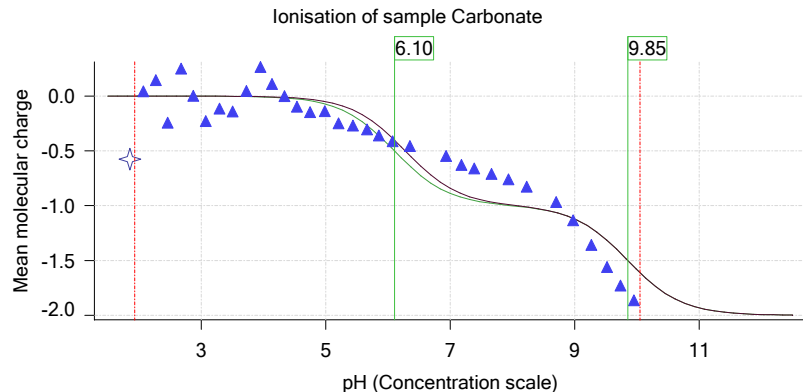

Sample name: **M15\_octanol**  
 Assay name: **pH-metric high logP**  
 Assay ID: **18C-03006**  
 Filename: **C:\Sirius\_T3\Mehtap\20180302\_exp29\_logP\_T3-2\18C-03006\_M15\_octanol\_pH-metric high logP.t3r**

Experiment start time: **3/3/2018 8:26:22 AM**  
 Analyst: **Pion**  
 Instrument ID: **T312060**

## Assay Model

| Settings                          | Value        | Date/Time changed    | Imported from      |
|-----------------------------------|--------------|----------------------|--------------------|
| Sample name                       | M15_octanol  | 2/27/2018 5:03:03 PM | User entered value |
| Sample by                         | Weight       |                      | Default value      |
| Sample weight                     | 0.001870 g   | 3/2/2018 5:09:20 PM  | User entered value |
| Formula weight                    | 209.25 g/mol | 2/27/2018 5:03:03 PM | User entered value |
| Solubility                        | Unknown      |                      | Default value      |
| Molecular weight                  | 209.25       | 2/27/2018 5:03:03 PM | User entered value |
| Individual pKa ionic environments | No           |                      | Default value      |
| Number of pKas                    | 2            | 2/27/2018 5:03:03 PM | User entered value |
| Sample is a                       | Base         | 2/27/2018 5:03:03 PM | User entered value |
| pKa 1                             | 2.58         | 2/27/2018 5:03:03 PM | User entered value |
| pKa 2                             | 5.30         | 2/27/2018 5:03:03 PM | User entered value |
| logP (XH2 2+)                     | -5.50        | 2/28/2018 2:10:35 PM | User entered value |
| logp (XH +)                       | -4.96        | 2/28/2018 2:10:28 PM | User entered value |
| logP (neutral X)                  | 1.92         | 2/28/2018 2:10:15 PM | User entered value |

## Events

| Time    | Event             | Water      | Acid       | Base       | Octanol    | pH     | dpH/dt   | pH R-squared | pH SD   | dpH/dt time         |
|---------|-------------------|------------|------------|------------|------------|--------|----------|--------------|---------|---------------------|
| 9:11.9  | Initial pH = 6.94 |            |            |            |            |        |          |              |         |                     |
| 12:16.5 | Data point 1      | 2.20002 mL | 0.09546 mL | 0.00000 mL | 0.05000 mL | 1.982  | 0.00078  | 0.01682      | 0.00030 | 10.0 s              |
| 13:04.2 | Data point 2      | 2.20002 mL | 0.09546 mL | 0.02439 mL | 0.05000 mL | 2.195  | 0.00638  | 0.59345      | 0.00041 | 10.0 s              |
| 13:40.0 | Data point 3      | 2.20002 mL | 0.09546 mL | 0.04048 mL | 0.05000 mL | 2.388  | 0.01407  | 0.48508      | 0.00100 | 14.5 s              |
| 14:20.2 | Data point 4      | 2.20002 mL | 0.09546 mL | 0.05160 mL | 0.05000 mL | 2.582  | -0.00048 | 0.03777      | 0.00012 | 10.0 s              |
| 14:55.8 | Data point 5      | 2.20002 mL | 0.09546 mL | 0.05952 mL | 0.05000 mL | 2.777  | -0.00803 | 0.16330      | 0.00098 | 10.0 s              |
| 15:31.3 | Data point 6      | 2.20002 mL | 0.09546 mL | 0.06526 mL | 0.05000 mL | 2.994  | -0.00078 | 0.13803      | 0.00010 | 10.0 s              |
| 16:06.8 | Data point 7      | 2.20002 mL | 0.09546 mL | 0.06928 mL | 0.05000 mL | 3.157  | -0.01081 | 0.35970      | 0.00089 | 11.5 s              |
| 16:54.2 | Data point 8      | 2.20002 mL | 0.09546 mL | 0.07272 mL | 0.05000 mL | 3.378  | -0.00291 | 0.60595      | 0.00018 | 10.5 s              |
| 17:30.2 | Data point 9      | 2.20002 mL | 0.09546 mL | 0.07491 mL | 0.05000 mL | 3.574  | 0.00106  | 0.01066      | 0.00051 | 10.0 s              |
| 18:05.7 | Data point 10     | 2.20002 mL | 0.09546 mL | 0.07658 mL | 0.05000 mL | 3.742  | -0.00515 | 0.52674      | 0.00035 | 10.0 s              |
| 18:46.3 | Data point 11     | 2.20002 mL | 0.09546 mL | 0.07843 mL | 0.05000 mL | 3.974  | -0.00048 | 0.00212      | 0.00052 | 10.0 s              |
| 19:32.3 | Data point 12     | 2.20002 mL | 0.09546 mL | 0.08281 mL | 0.05000 mL | 4.715  | 0.01154  | 0.48986      | 0.00081 | 10.0 s              |
| 20:18.1 | Data point 13     | 2.20002 mL | 0.09546 mL | 0.08488 mL | 0.05000 mL | 4.912  | -0.00828 | 0.71346      | 0.00048 | 10.0 s              |
| 20:53.6 | Data point 14     | 2.20002 mL | 0.09546 mL | 0.08699 mL | 0.05000 mL | 5.098  | -0.00493 | 0.05980      | 0.00099 | 10.0 s              |
| 21:29.0 | Data point 15     | 2.20002 mL | 0.09546 mL | 0.08897 mL | 0.05000 mL | 5.290  | -0.01048 | 0.79475      | 0.00058 | 10.5 s              |
| 22:05.1 | Data point 16     | 2.20002 mL | 0.09546 mL | 0.09064 mL | 0.05000 mL | 5.499  | 0.01607  | 0.65427      | 0.00098 | 13.0 s              |
| 22:43.5 | Data point 17     | 2.20002 mL | 0.09546 mL | 0.09196 mL | 0.05000 mL | 5.725  | -0.00818 | 0.73332      | 0.00047 | 10.5 s              |
| 23:19.5 | Data point 18     | 2.20002 mL | 0.09546 mL | 0.09290 mL | 0.05000 mL | 5.946  | -0.01316 | 0.44366      | 0.00098 | 10.0 s              |
| 23:55.0 | Data point 19     | 2.20002 mL | 0.09546 mL | 0.09353 mL | 0.05000 mL | 6.171  | -0.01198 | 0.37219      | 0.00097 | 10.5 s              |
| 24:30.9 | Data point 20     | 2.20002 mL | 0.09546 mL | 0.09396 mL | 0.05000 mL | 6.380  | -0.00989 | 0.27105      | 0.00094 | 11.5 s              |
| 25:07.8 | Data point 21     | 2.20002 mL | 0.09546 mL | 0.09424 mL | 0.05000 mL | 6.459  | -0.00347 | 0.03282      | 0.00095 | 11.5 s              |
| 25:49.9 | Data point 22     | 2.20002 mL | 0.09546 mL | 0.09468 mL | 0.05000 mL | 6.856  | -0.01929 | 0.91505      | 0.00100 | 47.5 s              |
| 27:13.3 | Data point 23     | 2.20002 mL | 0.09546 mL | 0.09494 mL | 0.05000 mL | 7.267  | -0.01675 | 0.68623      | 0.00100 | 42.5 s              |
| 28:31.5 | Data point 24     | 2.20002 mL | 0.09546 mL | 0.09508 mL | 0.05000 mL | 7.813  | -0.04110 | 0.97438      | 0.00206 | Timed out at 59.5 s |
| 30:12.4 | Data point 25     | 2.20002 mL | 0.09546 mL | 0.09518 mL | 0.05000 mL | 8.240  | -0.03638 | 0.97370      | 0.00182 | Timed out at 59.5 s |
| 31:48.0 | Data point 26     | 2.20002 mL | 0.09546 mL | 0.09525 mL | 0.05000 mL | 8.540  | -0.01949 | 0.94537      | 0.00099 | 55.0 s              |
| 33:23.8 | Data point 27     | 2.20002 mL | 0.09546 mL | 0.09537 mL | 0.05000 mL | 8.856  | -0.01251 | 0.96457      | 0.00063 | 36.5 s              |
| 34:36.2 | Data point 28     | 2.20002 mL | 0.09546 mL | 0.09551 mL | 0.05000 mL | 9.132  | -0.01942 | 0.95772      | 0.00098 | 30.0 s              |
| 35:42.0 | Data point 29     | 2.20002 mL | 0.09546 mL | 0.09570 mL | 0.05000 mL | 9.391  | -0.01949 | 0.95986      | 0.00098 | 17.5 s              |
| 36:35.3 | Data point 30     | 2.20002 mL | 0.09546 mL | 0.09595 mL | 0.05000 mL | 9.643  | -0.01556 | 0.97273      | 0.00078 | 17.0 s              |
| 37:28.0 | Data point 31     | 2.20002 mL | 0.09546 mL | 0.09628 mL | 0.05000 mL | 9.887  | -0.01964 | 0.96938      | 0.00098 | 14.5 s              |
| 38:13.3 | Data point 32     | 2.20002 mL | 0.09546 mL | 0.09666 mL | 0.05000 mL | 10.078 | -0.01833 | 0.96056      | 0.00092 | 11.5 s              |
| 39:26.5 | Data point 33     | 2.20002 mL | 0.20245 mL | 0.09666 mL | 0.15000 mL | 1.977  | -0.01121 | 0.68100      | 0.00067 | 10.0 s              |
| 40:13.0 | Data point 34     | 2.20002 mL | 0.20245 mL | 0.12578 mL | 0.15000 mL | 2.181  | -0.00937 | 0.91245      | 0.00048 | 10.5 s              |
| 40:49.3 | Data point 35     | 2.20002 mL | 0.20245 mL | 0.14367 mL | 0.15000 mL | 2.372  | 0.01563  | 0.60347      | 0.00099 | 14.0 s              |
| 41:29.0 | Data point 36     | 2.20002 mL | 0.20245 mL | 0.15602 mL | 0.15000 mL | 2.562  | -0.00403 | 0.15580      | 0.00050 | 10.0 s              |

Sample name: **M15\_octanol** Experiment start time: **3/3/2018 8:26:22 AM**  
 Assay name: **pH-metric high logP** Analyst: **Pion**  
 Assay ID: **18C-03006** Instrument ID: **T312060**  
 Filename: **C:\Sirius\_T3\Mehtap\20180302\_exp29\_logP\_T3-2\18C-03006\_M15\_octanol\_pH-metric high logP.t3r**

## Events (continued)

| Time      | Event         | Water      | Acid       | Base       | Octanol    | pH     | dpH/dt   | pH R-squared | pH SD   | dpH/dt time         |
|-----------|---------------|------------|------------|------------|------------|--------|----------|--------------|---------|---------------------|
| 42:04.6   | Data point 37 | 2.20002 mL | 0.20245 mL | 0.16482 mL | 0.15000 mL | 2.766  | -0.00114 | 0.29314      | 0.00010 | 10.5 s              |
| 42:40.6   | Data point 38 | 2.20002 mL | 0.20245 mL | 0.17107 mL | 0.15000 mL | 2.965  | 0.00091  | 0.07557      | 0.00016 | 10.5 s              |
| 43:16.5   | Data point 39 | 2.20002 mL | 0.20245 mL | 0.17564 mL | 0.15000 mL | 3.160  | -0.00686 | 0.19692      | 0.00076 | 10.0 s              |
| 43:52.1   | Data point 40 | 2.20002 mL | 0.20245 mL | 0.17902 mL | 0.15000 mL | 3.358  | -0.00225 | 0.26531      | 0.00022 | 10.0 s              |
| 44:27.6   | Data point 41 | 2.20002 mL | 0.20245 mL | 0.18161 mL | 0.15000 mL | 3.541  | -0.00311 | 0.56195      | 0.00020 | 10.0 s              |
| 44:53.0   | Data point 42 | 2.20002 mL | 0.20245 mL | 0.18375 mL | 0.15000 mL | 3.740  | -0.00336 | 0.76299      | 0.00019 | 10.0 s              |
| 45:38.5   | Data point 43 | 2.20002 mL | 0.20245 mL | 0.18568 mL | 0.15000 mL | 3.982  | -0.00227 | 0.41703      | 0.00017 | 10.0 s              |
| 46:24.3   | Data point 44 | 2.20002 mL | 0.20245 mL | 0.18758 mL | 0.15000 mL | 4.184  | -0.00909 | 0.29388      | 0.00083 | 13.5 s              |
| 47:03.3   | Data point 45 | 2.20002 mL | 0.20245 mL | 0.18970 mL | 0.15000 mL | 4.384  | -0.00440 | 0.08998      | 0.00072 | 10.0 s              |
| 47:38.8   | Data point 46 | 2.20002 mL | 0.20245 mL | 0.19193 mL | 0.15000 mL | 4.585  | 0.00070  | 0.00237      | 0.00071 | 10.0 s              |
| 48:14.2   | Data point 47 | 2.20002 mL | 0.20245 mL | 0.19412 mL | 0.15000 mL | 4.810  | -0.00945 | 0.23883      | 0.00096 | 10.0 s              |
| 48:49.7   | Data point 48 | 2.20002 mL | 0.20245 mL | 0.19610 mL | 0.15000 mL | 5.040  | -0.00439 | 0.29196      | 0.00040 | 10.5 s              |
| 49:25.6   | Data point 49 | 2.20002 mL | 0.20245 mL | 0.19767 mL | 0.15000 mL | 5.250  | -0.00627 | 0.48785      | 0.00044 | 10.5 s              |
| 50:01.6   | Data point 50 | 2.20002 mL | 0.20245 mL | 0.19885 mL | 0.15000 mL | 5.450  | -0.01045 | 0.65521      | 0.00064 | 10.5 s              |
| 50:37.5   | Data point 51 | 2.20002 mL | 0.20245 mL | 0.19969 mL | 0.15000 mL | 5.674  | -0.01202 | 0.60887      | 0.00076 | 11.0 s              |
| 51:13.9   | Data point 52 | 2.20002 mL | 0.20245 mL | 0.20028 mL | 0.15000 mL | 5.877  | -0.01959 | 0.97062      | 0.00098 | 12.0 s              |
| 51:51.4   | Data point 53 | 2.20002 mL | 0.20245 mL | 0.20068 mL | 0.15000 mL | 6.055  | -0.01017 | 0.29811      | 0.00092 | 12.5 s              |
| 52:29.4   | Data point 54 | 2.20002 mL | 0.20245 mL | 0.20099 mL | 0.15000 mL | 6.297  | -0.01877 | 0.95054      | 0.00095 | 23.5 s              |
| 53:23.6   | Data point 55 | 2.20002 mL | 0.20245 mL | 0.20136 mL | 0.15000 mL | 7.018  | -0.05573 | 0.98191      | 0.00278 | Timed out at 59.5 s |
| 54:59.2   | Data point 56 | 2.20002 mL | 0.20245 mL | 0.20158 mL | 0.15000 mL | 7.661  | -0.08712 | 0.98891      | 0.00433 | Timed out at 59.5 s |
| 56:40.0   | Data point 57 | 2.20002 mL | 0.20245 mL | 0.20167 mL | 0.15000 mL | 7.903  | -0.06287 | 0.97801      | 0.00314 | Timed out at 59.5 s |
| 58:20.7   | Data point 58 | 2.20002 mL | 0.20245 mL | 0.20176 mL | 0.15000 mL | 8.166  | -0.04207 | 0.98021      | 0.00210 | Timed out at 59.5 s |
| 1:00:11.8 | Data point 59 | 2.20002 mL | 0.20245 mL | 0.20195 mL | 0.15000 mL | 8.624  | -0.01762 | 0.98142      | 0.00088 | 36.5 s              |
| 1:01:29.3 | Data point 60 | 2.20002 mL | 0.20245 mL | 0.20209 mL | 0.15000 mL | 8.881  | -0.01366 | 0.48711      | 0.00097 | 19.5 s              |
| 1:02:24.3 | Data point 61 | 2.20002 mL | 0.20245 mL | 0.20226 mL | 0.15000 mL | 9.145  | -0.00856 | 0.31850      | 0.00075 | 30.0 s              |
| 1:03:24.9 | Data point 62 | 2.20002 mL | 0.20245 mL | 0.20245 mL | 0.15000 mL | 9.427  | -0.01587 | 0.72413      | 0.00092 | 12.5 s              |
| 1:04:08.0 | Data point 63 | 2.20002 mL | 0.20245 mL | 0.20275 mL | 0.15000 mL | 9.699  | -0.01697 | 0.88469      | 0.00089 | 13.5 s              |
| 1:04:52.1 | Data point 64 | 2.20002 mL | 0.20245 mL | 0.20313 mL | 0.15000 mL | 9.940  | -0.01307 | 0.46035      | 0.00095 | 18.5 s              |
| 1:05:41.2 | Data point 65 | 2.20002 mL | 0.20245 mL | 0.20350 mL | 0.15000 mL | 10.101 | -0.01920 | 0.91102      | 0.00099 | 10.5 s              |
| 1:06:58.1 | Data point 66 | 2.20002 mL | 0.31409 mL | 0.20350 mL | 0.45000 mL | 1.975  | -0.01558 | 0.84604      | 0.00084 | 10.0 s              |
| 1:07:44.6 | Data point 67 | 2.20002 mL | 0.31409 mL | 0.23408 mL | 0.45000 mL | 2.187  | 0.01489  | 0.60774      | 0.00094 | 12.5 s              |
| 1:08:23.0 | Data point 68 | 2.20002 mL | 0.31409 mL | 0.25320 mL | 0.45000 mL | 2.385  | 0.00088  | 0.09557      | 0.00014 | 10.0 s              |
| 1:08:58.7 | Data point 69 | 2.20002 mL | 0.31409 mL | 0.26618 mL | 0.45000 mL | 2.573  | -0.00649 | 0.12500      | 0.00091 | 10.0 s              |
| 1:09:34.4 | Data point 70 | 2.20002 mL | 0.31409 mL | 0.27545 mL | 0.45000 mL | 2.787  | -0.00191 | 0.06611      | 0.00037 | 10.0 s              |
| 1:10:09.9 | Data point 71 | 2.20002 mL | 0.31409 mL | 0.28206 mL | 0.45000 mL | 2.981  | 0.00572  | 0.62627      | 0.00036 | 10.5 s              |
| 1:10:46.0 | Data point 72 | 2.20002 mL | 0.31409 mL | 0.28704 mL | 0.45000 mL | 3.178  | -0.01361 | 0.49274      | 0.00096 | 10.5 s              |
| 1:11:21.9 | Data point 73 | 2.20002 mL | 0.31409 mL | 0.29090 mL | 0.45000 mL | 3.401  | 0.00911  | 0.20975      | 0.00098 | 10.0 s              |
| 1:11:57.5 | Data point 74 | 2.20002 mL | 0.31409 mL | 0.29400 mL | 0.45000 mL | 3.608  | -0.00440 | 0.13243      | 0.00060 | 10.0 s              |
| 1:12:32.9 | Data point 75 | 2.20002 mL | 0.31409 mL | 0.29678 mL | 0.45000 mL | 3.831  | 0.00458  | 0.65602      | 0.00028 | 10.5 s              |
| 1:13:09.0 | Data point 76 | 2.20002 mL | 0.31409 mL | 0.29944 mL | 0.45000 mL | 4.056  | -0.00707 | 0.18756      | 0.00081 | 18.0 s              |
| 1:13:52.5 | Data point 77 | 2.20002 mL | 0.31409 mL | 0.30198 mL | 0.45000 mL | 4.244  | -0.00994 | 0.26743      | 0.00095 | 10.0 s              |
| 1:14:28.0 | Data point 78 | 2.20002 mL | 0.31409 mL | 0.30435 mL | 0.45000 mL | 4.441  | -0.00154 | 0.01632      | 0.00059 | 10.0 s              |
| 1:15:03.5 | Data point 79 | 2.20002 mL | 0.31409 mL | 0.30640 mL | 0.45000 mL | 4.642  | -0.00829 | 0.23500      | 0.00084 | 10.0 s              |
| 1:15:38.9 | Data point 80 | 2.20002 mL | 0.31409 mL | 0.30804 mL | 0.45000 mL | 4.854  | 0.01636  | 0.66406      | 0.00099 | 20.5 s              |
| 1:16:24.9 | Data point 81 | 2.20002 mL | 0.31409 mL | 0.30927 mL | 0.45000 mL | 5.090  | 0.00586  | 0.12896      | 0.00081 | 19.0 s              |
| 1:17:19.6 | Data point 82 | 2.20002 mL | 0.31409 mL | 0.31016 mL | 0.45000 mL | 5.308  | -0.00746 | 0.23824      | 0.00075 | 11.0 s              |
| 1:17:56.0 | Data point 83 | 2.20002 mL | 0.31409 mL | 0.31070 mL | 0.45000 mL | 5.539  | -0.01384 | 0.63849      | 0.00086 | 11.5 s              |
| 1:18:32.9 | Data point 84 | 2.20002 mL | 0.31409 mL | 0.31105 mL | 0.45000 mL | 5.765  | 0.00783  | 0.17459      | 0.00093 | 18.0 s              |
| 1:19:16.4 | Data point 85 | 2.20002 mL | 0.31409 mL | 0.31129 mL | 0.45000 mL | 5.959  | -0.01816 | 0.90344      | 0.00094 | 15.0 s              |
| 1:19:56.8 | Data point 86 | 2.20002 mL | 0.31409 mL | 0.31148 mL | 0.45000 mL | 6.176  | -0.00051 | 0.00066      | 0.00098 | 30.0 s              |
| 1:20:52.2 | Data point 87 | 2.20002 mL | 0.31409 mL | 0.31162 mL | 0.45000 mL | 6.455  | -0.01711 | 0.79155      | 0.00095 | 59.5 s              |
| 1:22:22.2 | Data point 88 | 2.20002 mL | 0.31409 mL | 0.31181 mL | 0.45000 mL | 7.035  | -0.09484 | 0.98262      | 0.00473 | Timed out at 59.5 s |



## Assay Events

Sample name: **M15\_octanol**  
Assay name: **pH-metric high logP**  
Assay ID: **18C-03006**  
Filename: **C:\Sirius\_T3\Mehtap\20180302\_exp29\_logP\_T3-2\18C-03006\_M15\_octanol\_pH-metric high logP.t3r**

Experiment start time: **3/3/2018 8:26:22 AM**  
Analyst: **Pion**  
Instrument ID: **T312060**

## Events (continued)

| Time      | Event         | Water      | Acid       | Base       | Octanol    | pH     | dpH/dt   | pH R-squared | pH SD   | dpH/dt time         |
|-----------|---------------|------------|------------|------------|------------|--------|----------|--------------|---------|---------------------|
| 1:23:57.9 | Data point 89 | 2.20002 mL | 0.31409 mL | 0.31192 mL | 0.45000 mL | 7.282  | -0.07791 | 0.98221      | 0.00388 | Timed out at 59.5 s |
| 1:25:28.4 | Data point 90 | 2.20002 mL | 0.31409 mL | 0.31197 mL | 0.45000 mL | 7.488  | -0.07538 | 0.98886      | 0.00374 | Timed out at 59.5 s |
| 1:27:04.1 | Data point 91 | 2.20002 mL | 0.31409 mL | 0.31204 mL | 0.45000 mL | 7.764  | -0.08258 | 0.98709      | 0.00411 | Timed out at 59.5 s |
| 1:28:39.7 | Data point 92 | 2.20002 mL | 0.31409 mL | 0.31211 mL | 0.45000 mL | 8.037  | -0.06736 | 0.98943      | 0.00334 | Timed out at 59.5 s |
| 1:30:15.3 | Data point 93 | 2.20002 mL | 0.31409 mL | 0.31221 mL | 0.45000 mL | 8.330  | -0.04664 | 0.96334      | 0.00235 | Timed out at 59.5 s |
| 1:31:51.0 | Data point 94 | 2.20002 mL | 0.31409 mL | 0.31242 mL | 0.45000 mL | 8.802  | -0.01725 | 0.85754      | 0.00092 | 21.0 s              |
| 1:32:47.7 | Data point 95 | 2.20002 mL | 0.31409 mL | 0.31268 mL | 0.45000 mL | 9.073  | -0.00613 | 0.09179      | 0.00100 | 27.5 s              |
| 1:33:50.9 | Data point 96 | 2.20002 mL | 0.31409 mL | 0.31305 mL | 0.45000 mL | 9.365  | -0.01654 | 0.78160      | 0.00093 | 14.5 s              |
| 1:34:41.2 | Data point 97 | 2.20002 mL | 0.31409 mL | 0.31345 mL | 0.45000 mL | 9.616  | -0.01302 | 0.60064      | 0.00083 | 12.5 s              |
| 1:35:29.4 | Data point 98 | 2.20002 mL | 0.31409 mL | 0.31388 mL | 0.45000 mL | 9.835  | 0.00468  | 0.05381      | 0.00100 | 21.5 s              |
| 1:36:26.7 | Data point 99 | 2.20002 mL | 0.31409 mL | 0.31439 mL | 0.45000 mL | 10.049 | 0.00989  | 0.27168      | 0.00094 | 11.5 s              |
| 1:36:47.2 | Assay volumes | 2.20002 mL | 0.31409 mL | 0.31439 mL | 0.45000 mL |        |          |              |         |                     |



Sample name: **M15\_octanol**  
 Assay name: **pH-metric high logP**  
 Assay ID: **18C-03006**  
 Filename: **C:\Sirius\_T3\Mehtap\20180302\_exp29\_logP\_T3-2\18C-03006\_M15\_octanol\_pH-metric high logP.t3r**

Experiment start time: **3/3/2018 8:26:22 AM**  
 Analyst: **Pion**  
 Instrument ID: **T312060**

## Assay Settings

| Setting                             | Value              | Original Value | Date/Time changed | Imported from |
|-------------------------------------|--------------------|----------------|-------------------|---------------|
| <b>General Settings</b>             |                    |                |                   |               |
| Analyst name                        | Pion               |                |                   |               |
| <b>Standard Experiment Settings</b> |                    |                |                   |               |
| Number of titrations                | 3                  |                |                   |               |
| Minimum pH                          | 2.000              |                |                   |               |
| Maximum pH                          | 10.000             |                |                   |               |
| pH step between points of           | 0.200              |                |                   |               |
| Minimum titrant addition            | 0.00002 mL         |                |                   |               |
| Maximum titrant addition            | 0.10000 mL         |                |                   |               |
| Argon flow rate                     | 100%               |                |                   |               |
| Start titration using               | Cautious pH adjust |                |                   |               |
| <b>Advanced General Settings</b>    |                    |                |                   |               |
| Detect turbidity using              | None               |                |                   |               |
| Collect turbidity sensor data       | No                 |                |                   |               |
| Collect UV spectra                  | No                 |                |                   |               |
| Stir after titrant addition for     | 5 seconds          |                |                   |               |
| For titrant addition, stir at       | 10%                |                |                   |               |
| <b>Titration Pre-Dose</b>           |                    |                |                   |               |
| Titration pre-dose                  | None               |                |                   |               |
| <b>Assay Medium</b>                 |                    |                |                   |               |
| ISA water volume                    | 2.20 mL            |                |                   |               |
| Water added                         | Automatic          |                |                   |               |
| Partition solvent type              | Octanol            |                |                   |               |
| Partition volume                    | 0.050 mL           |                |                   |               |
| Partition solvent added             | Automatic          |                |                   |               |
| After partition addition, stir for  | 1 seconds          |                |                   |               |
| <b>Sample Sonication</b>            |                    |                |                   |               |
| Sonicate                            | Yes                |                |                   |               |
| Adjust pH for sonication            | No                 |                |                   |               |
| Sonicate for                        | 300 seconds        |                |                   |               |
| After sonication stir for           | 5 seconds          |                |                   |               |
| <b>Sample Dissolution</b>           |                    |                |                   |               |
| Perform a dissolution stage         | Yes                |                |                   |               |
| Adjust and hold pH for dissolution  | To start pH        |                |                   |               |
| Stir to dissolve for                | 120 seconds        |                |                   |               |
| For dissolution, stir at            | 10%                |                |                   |               |
| <b>Carbonate purge</b>              |                    |                |                   |               |
| Perform a carbonate purge           | No                 |                |                   |               |
| <b>Temperature Control</b>          |                    |                |                   |               |
| Wait for temperature                | Yes                |                |                   |               |
| Required start temperature          | 25.0°C             |                |                   |               |
| Acceptable deviation                | 0.5°C              |                |                   |               |
| Time to wait                        | 60 seconds         |                |                   |               |
| Stir speed of                       | 50%                |                |                   |               |
| <b>Titration 1</b>                  |                    |                |                   |               |
| Titrate from                        | Low to high pH     |                |                   |               |
| Adjust to start pH                  | Yes                |                |                   |               |
| After pH adjust stir for            | 30 seconds         |                |                   |               |
| Stir to allow partitioning for      | 15 seconds         |                |                   |               |
| Stirrer speed for partitioning      | 50%                |                |                   |               |
| <b>Titration 2</b>                  |                    |                |                   |               |
| Titrate from                        | Low to high pH     |                |                   |               |
| Add additional water                | 0.00 mL            |                |                   |               |
| Additional partition solvent volume | 0.100 mL           |                |                   |               |
| Additional partition solvent added  | Automatic          |                |                   |               |
| After pH adjust stir for            | 30 seconds         |                |                   |               |
| Stir to allow partitioning for      | 15 seconds         |                |                   |               |
| Stirrer speed for partitioning      | 55%                |                |                   |               |



Sample name: **M15\_octanol**  
Assay name: **pH-metric high logP**  
Assay ID: **18C-03006**  
Filename: **C:\Sirius\_T3\Mehtap\20180302\_exp29\_logP\_T3-2\18C-03006\_M15\_octanol\_pH-metric high logP.t3r**

Experiment start time: **3/3/2018 8:26:22 AM**  
Analyst: **Pion**  
Instrument ID: **T312060**

## Assay Settings (continued)

| Setting                             | Value          | Original Value | Date/Time changed | Imported from |
|-------------------------------------|----------------|----------------|-------------------|---------------|
| <b>Titration 3</b>                  |                |                |                   |               |
| Titrate from                        | Low to high pH |                |                   |               |
| Add additional water                | 0.00 mL        |                |                   |               |
| Additional partition solvent volume | 0.300 mL       |                |                   |               |
| Additional partition solvent added  | Automatic      |                |                   |               |
| After pH adjust stir for            | 30 seconds     |                |                   |               |
| Stir to allow partitioning for      | 15 seconds     |                |                   |               |
| Stirrer speed for partitioning      | 60%            |                |                   |               |
| <b>Data Point Stability</b>         |                |                |                   |               |
| Stir during data point collection   | No             |                |                   |               |
| Delay before data point collection  | 0 seconds      |                |                   |               |
| Number of points to average         | 20 points      |                |                   |               |
| Time interval between points        | 0.50 seconds   |                |                   |               |
| Required maximum standard deviation | 0.00100 dpH/dt |                |                   |               |
| Stability timeout after             | 60 seconds     |                |                   |               |

## Calibration Settings

| Setting                   | Value  | Date/Time changed   | Imported from             |
|---------------------------|--------|---------------------|---------------------------|
| Four-Plus alpha           | 0.111  | 3/3/2018 8:26:22 AM | C:\Sirius_T3\HCl18C02.t3r |
| Four-Plus S               | 0.9988 | 3/3/2018 8:26:22 AM | C:\Sirius_T3\HCl18C02.t3r |
| Four-Plus jH              | 1.0    | 3/3/2018 8:26:22 AM | C:\Sirius_T3\HCl18C02.t3r |
| Four-Plus jOH             | -0.8   | 3/3/2018 8:26:22 AM | C:\Sirius_T3\HCl18C02.t3r |
| Base concentration factor | 1.000  | 3/3/2018 8:26:22 AM | C:\Sirius_T3\KOH18B27.t3r |
| Acid concentration factor | 0.999  | 3/3/2018 8:26:22 AM | C:\Sirius_T3\HCl18C02.t3r |

## Instrument Settings

| Setting              | Value                      | Batch Id    | Install date           |
|----------------------|----------------------------|-------------|------------------------|
| Instrument owner     | Merck                      |             |                        |
| Instrument ID        | T312060                    |             |                        |
| Instrument type      | T3 Simulator               |             |                        |
| Software version     | 1.1.3.0                    |             |                        |
| Dispenser module     |                            | T3DM1200361 | 3/31/2009 5:24:52 AM   |
| Dispenser 0          | Water                      |             | 3/31/2009 5:25:05 AM   |
| Syringe volume       | 2.5 mL                     |             |                        |
| Firmware version     | 1.2.1(r2)                  |             |                        |
| Titrant              | Water (0.15 M KCl)         | 02-06-2018  | 2/27/2018 10:05:59 AM  |
| Dispenser 2          | Acid                       |             | 3/31/2009 5:25:11 AM   |
| Syringe volume       | 0.5 mL                     |             |                        |
| Firmware version     | 1.2.1(r2)                  |             |                        |
| Titrant              | Acid (0.5 M HCl)           | 02-27-2018  | 2/27/2018 10:27:22 AM  |
| Dispenser 1          | Base                       |             | 3/31/2009 5:25:21 AM   |
| Syringe volume       | 0.5 mL                     |             |                        |
| Firmware version     | 1.2.1(r2)                  |             |                        |
| Titrant              | Base (0.5 M KOH)           | 9/22/2017   | 2/27/2018 10:21:22 AM  |
| Dispenser 5          | Cosolvent                  |             | 3/31/2009 5:26:24 AM   |
| Syringe volume       | 2.5 mL                     |             |                        |
| Firmware version     | 1.2.1(r2)                  |             |                        |
| Distribution valve 5 | Distribution Valve         |             | 3/31/2009 5:28:19 AM   |
| Firmware version     | 1.1.3                      |             |                        |
| Port A               | Methanol (80%, 0.15 M KCl) | 09-26-17    | 2/7/2018 9:42:01 AM    |
| Port B               | Cyclohexane                | 11-01-17    | 2/27/2018 10:37:57 AM  |
| Dispenser 3          | Buffer                     |             | 8/3/2010 5:05:16 AM    |
| Syringe volume       | 0.5 mL                     |             |                        |
| Firmware version     | 1.2.1(r2)                  |             |                        |
| Titrant              | Dodecane                   | 2018/01/31  | 2/28/2018 10:18:04 AM  |
| Dispenser 6          | Octanol                    |             | 10/22/2010 10:52:43 AM |

Sample name: **M15\_octanol** Experiment start time: **3/3/2018 8:26:22 AM**  
 Assay name: **pH-metric high logP** Analyst: **Pion**  
 Assay ID: **18C-03006** Instrument ID: **T312060**  
 Filename: **C:\Sirius\_T3\Mehtap\20180302\_exp29\_logP\_T3-2\18C-03006\_M15\_octanol\_pH-metric high logP.t3r**

## Instrument Settings (continued)

| Setting                                   | Value                      | Batch Id    | Install date           |
|-------------------------------------------|----------------------------|-------------|------------------------|
| Syringe volume                            | 0.5 mL                     |             |                        |
| Firmware version                          | 1.2.1(r2)                  |             |                        |
| Titration                                 | Octanol                    | 01-31-2018  | 2/27/2018 9:59:35 AM   |
| Titration                                 |                            | T3TM1200161 | 3/31/2009 5:24:17 AM   |
| Horizontal axis firmware version          | 1.17 AI1DI2DO2 Stepper 2   |             |                        |
| Vertical axis firmware version            | 1.17 AI1DI2DO2 Stepper 2   |             |                        |
| Chassis I/O firmware version              | 1.11 AI1DI0DO4 Norgren I/O |             |                        |
| Probe I/O firmware version                | 1.1.1                      |             |                        |
| Electrode                                 | T3 Electrode               | T3E0923     | 1/23/2018 2:01:00 PM   |
| E0 calibration                            | +4.91 mV                   |             | 3/3/2018 8:26:50 AM    |
| Filling solution                          | 3M KCl                     | KCL097      | 3/2/2018 9:43:24 AM    |
| Liquids                                   |                            |             |                        |
| Wash 1                                    | 50% IPA:50% Water          |             | 3/2/2018 9:45:12 AM    |
| Wash 2                                    | 0.5% Triton X-100 in H2O   |             | 3/2/2018 9:45:15 AM    |
| Buffer position 1                         | pH7 Wash                   |             | 3/2/2018 9:45:18 AM    |
| Buffer position 2                         | pH 7                       |             | 3/2/2018 9:45:21 AM    |
| Storage position                          |                            |             | 3/2/2018 9:44:44 AM    |
| Wash water                                | 6.9e+003 mL                | 02-27-2018  | 2/27/2018 9:54:39 AM   |
| Waste                                     | 8.5e+003 mL                |             | 11/28/2017 10:36:29 AM |
| Temperature controller                    |                            |             | 8/5/2010 6:35:13 AM    |
| Turbidity detector                        |                            |             | 3/31/2009 5:24:45 AM   |
| Spectrometer                              |                            | 074811      | 11/23/2010 11:22:28 AM |
| Dip probe                                 |                            | 10196       |                        |
| Wavelength coefficient A0                 | 183.333                    |             |                        |
| Wavelength coefficient A1                 | 2.21568                    |             |                        |
| Wavelength coefficient A2                 | -0.000289308               |             |                        |
| Total lamp lit time                       | 120:41:49                  |             | 11/23/2010 11:22:28 AM |
| Calibrated on                             | 2/27/2018 10:40:38 AM      |             |                        |
| Integration time                          | 40                         |             |                        |
| Scans averaged                            | 10                         |             |                        |
| Autoloader                                |                            | T3AL1200345 | 11/10/2015 9:34:13 AM  |
| Left-right axis firmware version          | 1.17 AI1DI2DO2 Stepper 2   |             |                        |
| Front-back axis firmware version          | 1.17 AI1DI2DO2 Stepper 2   |             |                        |
| Vertical axis firmware version            | 1.17 AI1DI2DO2 Stepper 2   |             |                        |
| Chassis I/O firmware version              | 1.11 AI1DI0DO4 Norgren I/O |             |                        |
| Configuration                             |                            |             |                        |
| Alternate titration position              | Titration position         |             |                        |
| Alternate reference position              | Reference position         |             |                        |
| Maximum standard vial volume              | 3.50 mL                    |             |                        |
| Maximum alternate vial volume             | 25.00 mL                   |             |                        |
| Automatic action idle period              | 5 minute(s)                |             |                        |
| Titration tube volume                     | 1.3 mL                     |             |                        |
| Syringe flush count                       | 3.50                       |             |                        |
| Flowing wash pump volume                  | 20.0 mL                    |             |                        |
| Flowing wash stir duration                | 5 s                        |             |                        |
| Flowing wash stir speed                   | 30%                        |             |                        |
| Solvent wash stir duration                | 5 s                        |             |                        |
| Solvent wash stir speed                   | 30%                        |             |                        |
| Surfactant wash stir duration             | 5 s                        |             |                        |
| Surfactant wash stir speed                | 30%                        |             |                        |
| E0 calibration minimum number of points   | 10                         |             |                        |
| E0 calibration maximum standard deviation | 0.01500                    |             |                        |
| E0 calibration timeout period             | 60 s                       |             |                        |
| E0 calibration stir duration              | 5 s                        |             |                        |
| E0 calibration preparation stir speed     | 30%                        |             |                        |
| E0 calibration buffer wash stir duration  | 5 s                        |             |                        |
| E0 calibration buffer wash stir speed     | 30%                        |             |                        |
| E0 calibration reading stir speed         | 0%                         |             |                        |

Sample name: **M15\_octanol** Experiment start time: **3/3/2018 8:26:22 AM**  
 Assay name: **pH-metric high logP** Analyst: **Pion**  
 Assay ID: **18C-03006** Instrument ID: **T312060**  
 Filename: **C:\Sirius\_T3\Mehtap\20180302\_exp29\_logP\_T3-2\18C-03006\_M15\_octanol\_pH-metric high logP.t3r**

## Instrument Settings (continued)

| Setting                                     | Value   | Batch Id | Install date |
|---------------------------------------------|---------|----------|--------------|
| Spectrometer calibration stir duration      | 5 s     |          |              |
| Spectrometer calibration stir speed         | 30%     |          |              |
| Spectrometer calibration wash pump volume   | 20.0 mL |          |              |
| Spectrometer calibration wash stir duration | 5 s     |          |              |
| Spectrometer calibration wash stir speed    | 30%     |          |              |
| Overhead dispense height                    | 10000   |          |              |

## Refinement Settings

| Setting                        | Value    | Default value |
|--------------------------------|----------|---------------|
| Turbidity detection method     | None     | None          |
| Turbidity wavelength to assess | 500.0 nm | 500.0 nm      |
| Turbidity maximum absorbance   | 0.100    | 0.100         |
| Turbidity probe threshold      | 50.00    | 50.00         |

## Experiment Log

[2:38] Air gap created for Water (0.15 M KCl)  
 [2:38] Air gap created for Acid (0.5 M HCl)  
 [2:38] Air gap created for Base (0.5 M KOH)  
 [2:39] Air gap released for Water (0.15 M KCl)  
 [2:43] Titrator arm moved over Titration position  
 [2:43] Titration 1 of 3  
 [2:43] Adding initial titrants  
 [2:43] Automatically add 2.20000 mL of water  
 [3:19] Dispensed 2.200024 mL of Water (0.15 M KCl)  
 [3:24] Titrator arm moved over Drain  
 [9:05] Titrator arm moved to Titration position  
 [9:05] Argon flow rate set to 100  
 [9:05] Stirrer speed set to 10  
 [9:10] Automatically add 0.05000 mL of Octanol  
 [9:11] Dispensed 0.050000 mL of Octanol  
 [9:12] Initial pH = 6.94  
 [9:12] Iterative adjust 6.94 -> 2.00  
 [9:12] pH 6.94 -> 2.00  
 [9:15] Air gap released for Acid (0.5 M HCl)  
 [9:16] Dispensed 0.091322 mL of Acid (0.5 M HCl)  
 [9:21] pH 2.02 -> 2.00  
 [9:21] Dispensed 0.002563 mL of Acid (0.5 M HCl)  
 [9:26] pH 2.01 -> 2.00  
 [9:26] Dispensed 0.001576 mL of Acid (0.5 M HCl)  
 [9:31] Holding pH 2.00  
 [11:32] Stirrer speed set to 0  
 [11:32] Stirrer speed set to 50  
 [11:32] Iterative adjust 1.99 -> 2.00  
 [12:17] Stirrer speed set to 0  
 [12:27] Datapoint id 1 collected  
 [12:27] Stirrer speed set to 50  
 [12:32] pH 1.99 -> 2.19  
 [12:32] Using cautious pH adjust  
 [12:33] Air gap released for Base (0.5 M KOH)  
 [12:34] Dispensed 0.012465 mL of Base (0.5 M KOH)  
 [12:39] Stepping pH = 2.08  
 [12:39] Dispensed 0.009243 mL of Base (0.5 M KOH)  
 [12:44] Stepping pH = 2.16  
 [12:44] Dispensed 0.002681 mL of Base (0.5 M KOH)  
 [12:49] Stepping pH = 2.19  
 [13:05] Stirrer speed set to 0  
 [13:15] Datapoint id 2 collected

Sample name: **M15\_octanol**  
Assay name: **pH-metric high logP**  
Assay ID: **18C-03006**  
Filename: **C:\Sirius\_T3\Mehtap\20180302\_exp29\_logP\_T3-2\18C-03006\_M15\_octanol\_pH-metric high logP.t3r**

Experiment start time: **3/3/2018 8:26:22 AM**  
Analyst: **Pion**  
Instrument ID: **T312060**

## Experiment Log (continued)

[13:15] Charge balance equation is out by 2.1%  
[13:15] Stirrer speed set to 50  
[13:20] pH 2.20 -> 2.40  
[13:20] Using charge balance adjust  
[13:20] Dispensed 0.016087 mL of Base (0.5 M KOH)  
[13:40] Stirrer speed set to 0  
[13:55] Datapoint id 3 collected  
[13:55] Charge balance equation is out by -5.3%  
[13:55] Stirrer speed set to 50  
[14:00] pH 2.39 -> 2.59  
[14:00] Using charge balance adjust  
[14:00] Dispensed 0.011124 mL of Base (0.5 M KOH)  
[14:21] Stirrer speed set to 0  
[14:31] Datapoint id 4 collected  
[14:31] Charge balance equation is out by -5.5%  
[14:31] Stirrer speed set to 50  
[14:36] pH 2.59 -> 2.79  
[14:36] Using charge balance adjust  
[14:36] Dispensed 0.007926 mL of Base (0.5 M KOH)  
[14:56] Stirrer speed set to 0  
[15:06] Datapoint id 5 collected  
[15:06] Charge balance equation is out by -5.2%  
[15:06] Stirrer speed set to 50  
[15:11] pH 2.78 -> 2.98  
[15:11] Using charge balance adjust  
[15:12] Dispensed 0.005738 mL of Base (0.5 M KOH)  
[15:32] Stirrer speed set to 0  
[15:42] Datapoint id 6 collected  
[15:42] Charge balance equation is out by 5.1%  
[15:42] Stirrer speed set to 50  
[15:47] pH 3.00 -> 3.20  
[15:47] Using charge balance adjust  
[15:47] Dispensed 0.004022 mL of Base (0.5 M KOH)  
[16:07] Stirrer speed set to 0  
[16:19] Datapoint id 7 collected  
[16:19] Charge balance equation is out by -21.3%  
[16:19] Stirrer speed set to 50  
[16:24] pH 3.16 -> 3.36  
[16:24] Using cautious pH adjust  
[16:24] Dispensed 0.001529 mL of Base (0.5 M KOH)  
[16:29] Stepping pH = 3.23  
[16:29] Dispensed 0.001693 mL of Base (0.5 M KOH)  
[16:34] Stepping pH = 3.35  
[16:34] Dispensed 0.000212 mL of Base (0.5 M KOH)  
[16:39] Stepping pH = 3.38  
[16:55] Stirrer speed set to 0  
[17:05] Datapoint id 8 collected  
[17:05] Charge balance equation is out by -11.9%  
[17:05] Stirrer speed set to 50  
[17:10] pH 3.38 -> 3.58  
[17:10] Using charge balance adjust  
[17:10] Dispensed 0.002187 mL of Base (0.5 M KOH)  
[17:31] Stirrer speed set to 0  
[17:41] Datapoint id 9 collected  
[17:41] Charge balance equation is out by -4.7%  
[17:41] Stirrer speed set to 50  
[17:46] pH 3.58 -> 3.78  
[17:46] Using charge balance adjust  
[17:46] Dispensed 0.001670 mL of Base (0.5 M KOH)

Sample name: **M15\_octanol**  
Assay name: **pH-metric high logP**  
Assay ID: **18C-03006**  
Filename: **C:\Sirius\_T3\Mehtap\20180302\_exp29\_logP\_T3-2\18C-03006\_M15\_octanol\_pH-metric high logP.t3r**

Experiment start time: **3/3/2018 8:26:22 AM**  
Analyst: **Pion**  
Instrument ID: **T312060**

## Experiment Log (continued)

[18:06] Stirrer speed set to 0  
[18:16] Datapoint id 10 collected  
[18:16] Charge balance equation is out by -19.9%  
[18:16] Stirrer speed set to 50  
[18:21] pH 3.75 -> 3.95  
[18:21] Using cautious pH adjust  
[18:21] Dispensed 0.000729 mL of Base (0.5 M KOH)  
[18:26] Stepping pH = 3.79  
[18:26] Dispensed 0.001129 mL of Base (0.5 M KOH)  
[18:32] Stepping pH = 3.95  
[18:47] Stirrer speed set to 0  
[18:57] Datapoint id 11 collected  
[18:57] Charge balance equation is out by -27.1%  
[18:57] Stirrer speed set to 50  
[19:02] pH 3.98 -> 4.18  
[19:02] Using cautious pH adjust  
[19:02] Dispensed 0.000706 mL of Base (0.5 M KOH)  
[19:07] Stepping pH = 4.04  
[19:07] Dispensed 0.000917 mL of Base (0.5 M KOH)  
[19:12] Stepping pH = 4.04  
[19:12] Dispensed 0.002752 mL of Base (0.5 M KOH)  
[19:18] Stepping pH = 4.69  
[19:33] Stirrer speed set to 0  
[19:43] Datapoint id 12 collected  
[19:43] Charge balance equation is out by -214.2%  
[19:43] Stirrer speed set to 50  
[19:48] pH 4.72 -> 4.92  
[19:48] Using cautious pH adjust  
[19:48] Dispensed 0.001058 mL of Base (0.5 M KOH)  
[19:53] Stepping pH = 4.82  
[19:53] Dispensed 0.000800 mL of Base (0.5 M KOH)  
[19:58] Stepping pH = 4.90  
[19:58] Dispensed 0.000212 mL of Base (0.5 M KOH)  
[20:03] Stepping pH = 4.92  
[20:18] Stirrer speed set to 0  
[20:29] Datapoint id 13 collected  
[20:29] Charge balance equation is out by 2.5%  
[20:29] Stirrer speed set to 50  
[20:34] pH 4.92 -> 5.12  
[20:34] Using charge balance adjust  
[20:34] Dispensed 0.002117 mL of Base (0.5 M KOH)  
[20:54] Stirrer speed set to 0  
[21:04] Datapoint id 14 collected  
[21:04] Charge balance equation is out by -10.3%  
[21:04] Stirrer speed set to 50  
[21:09] pH 5.10 -> 5.30  
[21:09] Using charge balance adjust  
[21:09] Dispensed 0.001976 mL of Base (0.5 M KOH)  
[21:29] Stirrer speed set to 0  
[21:40] Datapoint id 15 collected  
[21:40] Charge balance equation is out by -6.8%  
[21:40] Stirrer speed set to 50  
[21:45] pH 5.30 -> 5.50  
[21:45] Using charge balance adjust  
[21:45] Dispensed 0.001670 mL of Base (0.5 M KOH)  
[22:05] Stirrer speed set to 0  
[22:19] Datapoint id 16 collected  
[22:19] Charge balance equation is out by 1.3%  
[22:19] Stirrer speed set to 50

Sample name: **M15\_octanol**  
Assay name: **pH-metric high logP**  
Assay ID: **18C-03006**  
Filename: **C:\Sirius\_T3\Mehtap\20180302\_exp29\_logP\_T3-2\18C-03006\_M15\_octanol\_pH-metric high logP.t3r**

Experiment start time: **3/3/2018 8:26:22 AM**  
Analyst: **Pion**  
Instrument ID: **T312060**

## Experiment Log (continued)

[22:24] pH 5.50 -> 5.70  
[22:24] Using charge balance adjust  
[22:24] Dispensed 0.001317 mL of Base (0.5 M KOH)  
[22:44] Stirrer speed set to 0  
[22:54] Datapoint id 17 collected  
[22:54] Charge balance equation is out by 10.1%  
[22:54] Stirrer speed set to 50  
[23:00] pH 5.73 -> 5.93  
[23:00] Using charge balance adjust  
[23:00] Dispensed 0.000941 mL of Base (0.5 M KOH)  
[23:20] Stirrer speed set to 0  
[23:30] Datapoint id 18 collected  
[23:30] Charge balance equation is out by 7.6%  
[23:30] Stirrer speed set to 50  
[23:35] pH 5.95 -> 6.15  
[23:35] Using charge balance adjust  
[23:35] Dispensed 0.000635 mL of Base (0.5 M KOH)  
[23:55] Stirrer speed set to 0  
[24:06] Datapoint id 19 collected  
[24:06] Charge balance equation is out by 8.2%  
[24:06] Stirrer speed set to 50  
[24:11] pH 6.18 -> 6.38  
[24:11] Using charge balance adjust  
[24:11] Dispensed 0.000423 mL of Base (0.5 M KOH)  
[24:31] Stirrer speed set to 0  
[24:43] Datapoint id 20 collected  
[24:43] Charge balance equation is out by 0.3%  
[24:43] Stirrer speed set to 50  
[24:48] pH 6.39 -> 6.59  
[24:48] Using charge balance adjust  
[24:48] Dispensed 0.000282 mL of Base (0.5 M KOH)  
[25:08] Stirrer speed set to 0  
[25:20] Datapoint id 21 collected  
[25:20] Charge balance equation is out by -64.1%  
[25:20] Stirrer speed set to 50  
[25:25] pH 6.47 -> 6.67  
[25:25] Using cautious pH adjust  
[25:25] Dispensed 0.000118 mL of Base (0.5 M KOH)  
[25:30] Stepping pH = 6.48  
[25:30] Dispensed 0.000329 mL of Base (0.5 M KOH)  
[25:35] Stepping pH = 6.72  
[25:50] Stirrer speed set to 0  
[26:38] Datapoint id 22 collected  
[26:38] Charge balance equation is out by -84.6%  
[26:38] Stirrer speed set to 50  
[26:43] pH 6.88 -> 7.08  
[26:43] Using cautious pH adjust  
[26:43] Dispensed 0.000047 mL of Base (0.5 M KOH)  
[26:48] Stepping pH = 6.89  
[26:48] Dispensed 0.000141 mL of Base (0.5 M KOH)  
[26:53] Stepping pH = 6.99  
[26:53] Dispensed 0.000071 mL of Base (0.5 M KOH)  
[26:59] Stepping pH = 7.16  
[27:14] Stirrer speed set to 0  
[27:56] Datapoint id 23 collected  
[27:56] Charge balance equation is out by -162.3%  
[27:56] Stirrer speed set to 50  
[28:01] pH 7.29 -> 7.49  
[28:01] Using cautious pH adjust



Sample name: **M15\_octanol**  
 Assay name: **pH-metric high logP**  
 Assay ID: **18C-03006**  
 Filename: **C:\Sirius\_T3\Mehtap\20180302\_exp29\_logP\_T3-2\18C-03006\_M15\_octanol\_pH-metric high logP.t3r**

Experiment start time: **3/3/2018 8:26:22 AM**  
 Analyst: **Pion**  
 Instrument ID: **T312060**

## Experiment Log (continued)

[28:01] Dispensed 0.000024 mL of Base (0.5 M KOH)  
 [28:07] Stepping pH = 7.31  
 [28:07] Dispensed 0.000071 mL of Base (0.5 M KOH)  
 [28:12] Stepping pH = 7.38  
 [28:12] Dispensed 0.000047 mL of Base (0.5 M KOH)  
 [28:17] Stepping pH = 7.59  
 [28:32] Stirrer speed set to 0  
 [29:32] Datapoint id 24 collected  
 [29:32] Charge balance equation is out by -197.2%  
 [29:32] Stirrer speed set to 50  
 [29:37] pH 7.82 -> 8.02  
 [29:37] Using cautious pH adjust  
 [29:37] Dispensed 0.000024 mL of Base (0.5 M KOH)  
 [29:42] Stepping pH = 7.84  
 [29:42] Dispensed 0.000024 mL of Base (0.5 M KOH)  
 [29:47] Stepping pH = 7.88  
 [29:47] Dispensed 0.000024 mL of Base (0.5 M KOH)  
 [29:53] Stepping pH = 7.99  
 [29:53] Dispensed 0.000024 mL of Base (0.5 M KOH)  
 [29:58] Stepping pH = 8.15  
 [30:13] Stirrer speed set to 0  
 [31:13] Datapoint id 25 collected  
 [31:13] Charge balance equation is out by -439.5%  
 [31:13] Stirrer speed set to 50  
 [31:18] pH 8.28 -> 8.48  
 [31:18] Using cautious pH adjust  
 [31:18] Dispensed 0.000024 mL of Base (0.5 M KOH)  
 [31:23] Stepping pH = 8.34  
 [31:23] Dispensed 0.000024 mL of Base (0.5 M KOH)  
 [31:28] Stepping pH = 8.41  
 [31:28] Dispensed 0.000024 mL of Base (0.5 M KOH)  
 [31:33] Stepping pH = 8.51  
 [31:48] Stirrer speed set to 0  
 [32:44] Datapoint id 26 collected  
 [32:44] Charge balance equation is out by -243.3%  
 [32:44] Stirrer speed set to 50  
 [32:49] pH 8.54 -> 8.74  
 [32:49] Using cautious pH adjust  
 [32:49] Dispensed 0.000024 mL of Base (0.5 M KOH)  
 [32:54] Stepping pH = 8.57  
 [32:54] Dispensed 0.000024 mL of Base (0.5 M KOH)  
 [32:59] Stepping pH = 8.63  
 [32:59] Dispensed 0.000047 mL of Base (0.5 M KOH)  
 [33:04] Stepping pH = 8.72  
 [33:04] Dispensed 0.000024 mL of Base (0.5 M KOH)  
 [33:09] Stepping pH = 8.81  
 [33:24] Stirrer speed set to 0  
 [34:01] Datapoint id 27 collected  
 [34:01] Charge balance equation is out by -320.9%  
 [34:01] Stirrer speed set to 50  
 [34:06] pH 8.87 -> 9.07  
 [34:06] Using cautious pH adjust  
 [34:06] Dispensed 0.000024 mL of Base (0.5 M KOH)  
 [34:11] Stepping pH = 8.90  
 [34:11] Dispensed 0.000071 mL of Base (0.5 M KOH)  
 [34:16] Stepping pH = 8.98  
 [34:16] Dispensed 0.000047 mL of Base (0.5 M KOH)  
 [34:21] Stepping pH = 9.08  
 [34:37] Stirrer speed set to 0

Sample name: **M15\_octanol**  
Assay name: **pH-metric high logP**  
Assay ID: **18C-03006**  
Filename: **C:\Sirius\_T3\Mehtap\20180302\_exp29\_logP\_T3-2\18C-03006\_M15\_octanol\_pH-metric high logP.t3r**

Experiment start time: **3/3/2018 8:26:22 AM**  
Analyst: **Pion**  
Instrument ID: **T312060**

## Experiment Log (continued)

[35:07] Datapoint id 28 collected  
[35:07] Charge balance equation is out by -173.9%  
[35:07] Stirrer speed set to 50  
[35:12] pH 9.15 -> 9.35  
[35:12] Using cautious pH adjust  
[35:12] Dispensed 0.000047 mL of Base (0.5 M KOH)  
[35:17] Stepping pH = 9.18  
[35:17] Dispensed 0.000094 mL of Base (0.5 M KOH)  
[35:22] Stepping pH = 9.28  
[35:22] Dispensed 0.000047 mL of Base (0.5 M KOH)  
[35:27] Stepping pH = 9.36  
[35:42] Stirrer speed set to 0  
[36:00] Datapoint id 29 collected  
[36:00] Charge balance equation is out by -130.4%  
[36:00] Stirrer speed set to 50  
[36:05] pH 9.40 -> 9.60  
[36:05] Using cautious pH adjust  
[36:05] Dispensed 0.000071 mL of Base (0.5 M KOH)  
[36:10] Stepping pH = 9.42  
[36:10] Dispensed 0.000165 mL of Base (0.5 M KOH)  
[36:15] Stepping pH = 9.57  
[36:15] Dispensed 0.000024 mL of Base (0.5 M KOH)  
[36:21] Stepping pH = 9.63  
[36:36] Stirrer speed set to 0  
[36:53] Datapoint id 30 collected  
[36:53] Charge balance equation is out by -89.0%  
[36:53] Stirrer speed set to 50  
[36:58] pH 9.65 -> 9.85  
[36:58] Using cautious pH adjust  
[36:58] Dispensed 0.000118 mL of Base (0.5 M KOH)  
[37:03] Stepping pH = 9.69  
[37:03] Dispensed 0.000188 mL of Base (0.5 M KOH)  
[37:08] Stepping pH = 9.83  
[37:08] Dispensed 0.000024 mL of Base (0.5 M KOH)  
[37:13] Stepping pH = 9.88  
[37:28] Stirrer speed set to 0  
[37:43] Datapoint id 31 collected  
[37:43] Charge balance equation is out by -50.9%  
[37:43] Stirrer speed set to 50  
[37:48] pH 9.89 -> 10.05  
[37:48] Using cautious pH adjust  
[37:48] Dispensed 0.000141 mL of Base (0.5 M KOH)  
[37:53] Stepping pH = 9.93  
[37:53] Dispensed 0.000235 mL of Base (0.5 M KOH)  
[37:59] Stepping pH = 10.04  
[38:14] Stirrer speed set to 0  
[38:25] Datapoint id 32 collected  
[38:25] Charge balance equation is out by -35.0%  
[38:25] Titration 2 of 3  
[38:25] Adding initial titrants  
[38:25] Automatically add 0.10000 mL of Octanol  
[38:28] Dispensed 0.100000 mL of Octanol  
[38:28] Stirrer speed set to 10  
[38:29] Stirrer speed set to 55  
[38:29] Iterative adjust 10.08 -> 2.00  
[38:29] pH 10.08 -> 2.00  
[38:31] Dispensed 0.097789 mL of Acid (0.5 M HCl)  
[38:36] pH 2.06 -> 2.00  
[38:37] Dispensed 0.009196 mL of Acid (0.5 M HCl)



Sample name: **M15\_octanol**  
Assay name: **pH-metric high logP**  
Assay ID: **18C-03006**  
Filename: **C:\Sirius\_T3\Mehtap\20180302\_exp29\_logP\_T3-2\18C-03006\_M15\_octanol\_pH-metric high logP.t3r**

Experiment start time: **3/3/2018 8:26:22 AM**  
Analyst: **Pion**  
Instrument ID: **T312060**

## Experiment Log (continued)

[39:27] Stirrer speed set to 0  
[39:37] Datapoint id 33 collected  
[39:37] Stirrer speed set to 55  
[39:42] pH 1.98 -> 2.18  
[39:42] Using cautious pH adjust  
[39:42] Dispensed 0.013711 mL of Base (0.5 M KOH)  
[39:48] Stepping pH = 2.06  
[39:48] Dispensed 0.011947 mL of Base (0.5 M KOH)  
[39:53] Stepping pH = 2.15  
[39:53] Dispensed 0.003457 mL of Base (0.5 M KOH)  
[39:58] Stepping pH = 2.18  
[40:13] Stirrer speed set to 0  
[40:24] Datapoint id 34 collected  
[40:24] Charge balance equation is out by -6.2%  
[40:24] Stirrer speed set to 55  
[40:29] pH 2.18 -> 2.38  
[40:29] Using charge balance adjust  
[40:30] Dispensed 0.017897 mL of Base (0.5 M KOH)  
[40:50] Stirrer speed set to 0  
[41:04] Datapoint id 35 collected  
[41:04] Charge balance equation is out by -6.3%  
[41:04] Stirrer speed set to 55  
[41:09] pH 2.38 -> 2.58  
[41:09] Using charge balance adjust  
[41:09] Dispensed 0.012347 mL of Base (0.5 M KOH)  
[41:29] Stirrer speed set to 0  
[41:39] Datapoint id 36 collected  
[41:39] Charge balance equation is out by -7.2%  
[41:39] Stirrer speed set to 55  
[41:44] pH 2.57 -> 2.77  
[41:44] Using charge balance adjust  
[41:45] Dispensed 0.008796 mL of Base (0.5 M KOH)  
[42:05] Stirrer speed set to 0  
[42:16] Datapoint id 37 collected  
[42:16] Charge balance equation is out by -0.8%  
[42:16] Stirrer speed set to 55  
[42:21] pH 2.77 -> 2.97  
[42:21] Using charge balance adjust  
[42:21] Dispensed 0.006256 mL of Base (0.5 M KOH)  
[42:41] Stirrer speed set to 0  
[42:51] Datapoint id 38 collected  
[42:51] Charge balance equation is out by -4.0%  
[42:51] Stirrer speed set to 55  
[42:56] pH 2.97 -> 3.17  
[42:56] Using charge balance adjust  
[42:57] Dispensed 0.004563 mL of Base (0.5 M KOH)  
[43:17] Stirrer speed set to 0  
[43:27] Datapoint id 39 collected  
[43:27] Charge balance equation is out by -5.3%  
[43:27] Stirrer speed set to 55  
[43:32] pH 3.16 -> 3.36  
[43:32] Using charge balance adjust  
[43:32] Dispensed 0.003387 mL of Base (0.5 M KOH)  
[43:52] Stirrer speed set to 0  
[44:02] Datapoint id 40 collected  
[44:02] Charge balance equation is out by -3.5%  
[44:03] Stirrer speed set to 55  
[44:08] pH 3.36 -> 3.56  
[44:08] Using charge balance adjust

Sample name: **M15\_octanol**  
Assay name: **pH-metric high logP**  
Assay ID: **18C-03006**  
Filename: **C:\Sirius\_T3\Mehtap\20180302\_exp29\_logP\_T3-2\18C-03006\_M15\_octanol\_pH-metric high logP.t3r**

Experiment start time: **3/3/2018 8:26:22 AM**  
Analyst: **Pion**  
Instrument ID: **T312060**

## Experiment Log (continued)

[44:08] Dispensed 0.002587 mL of Base (0.5 M KOH)  
[44:28] Stirrer speed set to 0  
[44:38] Datapoint id 41 collected  
[44:38] Charge balance equation is out by -11.2%  
[44:38] Stirrer speed set to 55  
[44:43] pH 3.55 -> 3.75  
[44:43] Using charge balance adjust  
[44:43] Dispensed 0.002140 mL of Base (0.5 M KOH)  
[45:03] Stirrer speed set to 0  
[45:13] Datapoint id 42 collected  
[45:13] Charge balance equation is out by -2.6%  
[45:13] Stirrer speed set to 55  
[45:19] pH 3.75 -> 3.95  
[45:19] Using charge balance adjust  
[45:19] Dispensed 0.001929 mL of Base (0.5 M KOH)  
[45:39] Stirrer speed set to 0  
[45:49] Datapoint id 43 collected  
[45:49] Charge balance equation is out by 18.3%  
[45:49] Stirrer speed set to 55  
[45:54] pH 3.98 -> 4.18  
[45:54] Using cautious pH adjust  
[45:54] Dispensed 0.000988 mL of Base (0.5 M KOH)  
[45:59] Stepping pH = 4.08  
[45:59] Dispensed 0.000753 mL of Base (0.5 M KOH)  
[46:04] Stepping pH = 4.16  
[46:05] Dispensed 0.000165 mL of Base (0.5 M KOH)  
[46:10] Stepping pH = 4.19  
[46:25] Stirrer speed set to 0  
[46:38] Datapoint id 44 collected  
[46:38] Charge balance equation is out by 2.9%  
[46:38] Stirrer speed set to 55  
[46:43] pH 4.19 -> 4.39  
[46:43] Using charge balance adjust  
[46:44] Dispensed 0.002117 mL of Base (0.5 M KOH)  
[47:04] Stirrer speed set to 0  
[47:14] Datapoint id 45 collected  
[47:14] Charge balance equation is out by -2.0%  
[47:14] Stirrer speed set to 55  
[47:19] pH 4.39 -> 4.59  
[47:19] Using charge balance adjust  
[47:19] Dispensed 0.002234 mL of Base (0.5 M KOH)  
[47:39] Stirrer speed set to 0  
[47:49] Datapoint id 46 collected  
[47:49] Charge balance equation is out by -1.0%  
[47:49] Stirrer speed set to 55  
[47:54] pH 4.59 -> 4.79  
[47:54] Using charge balance adjust  
[47:54] Dispensed 0.002187 mL of Base (0.5 M KOH)  
[48:15] Stirrer speed set to 0  
[48:25] Datapoint id 47 collected  
[48:25] Charge balance equation is out by 11.4%  
[48:25] Stirrer speed set to 55  
[48:30] pH 4.81 -> 5.01  
[48:30] Using charge balance adjust  
[48:30] Dispensed 0.001976 mL of Base (0.5 M KOH)  
[48:50] Stirrer speed set to 0  
[49:01] Datapoint id 48 collected  
[49:01] Charge balance equation is out by 14.0%  
[49:01] Stirrer speed set to 55

Sample name: **M15\_octanol**  
Assay name: **pH-metric high logP**  
Assay ID: **18C-03006**  
Filename: **C:\Sirius\_T3\Mehtap\20180302\_exp29\_logP\_T3-2\18C-03006\_M15\_octanol\_pH-metric high logP.t3r**

Experiment start time: **3/3/2018 8:26:22 AM**  
Analyst: **Pion**  
Instrument ID: **T312060**

## Experiment Log (continued)

[49:06] pH 5.04 -> 5.24  
[49:06] Using charge balance adjust  
[49:06] Dispensed 0.001576 mL of Base (0.5 M KOH)  
[49:26] Stirrer speed set to 0  
[49:37] Datapoint id 49 collected  
[49:37] Charge balance equation is out by 3.3%  
[49:37] Stirrer speed set to 55  
[49:42] pH 5.26 -> 5.46  
[49:42] Using charge balance adjust  
[49:42] Dispensed 0.001176 mL of Base (0.5 M KOH)  
[50:02] Stirrer speed set to 0  
[50:13] Datapoint id 50 collected  
[50:13] Charge balance equation is out by -3.5%  
[50:13] Stirrer speed set to 55  
[50:18] pH 5.46 -> 5.66  
[50:18] Using charge balance adjust  
[50:18] Dispensed 0.000847 mL of Base (0.5 M KOH)  
[50:38] Stirrer speed set to 0  
[50:49] Datapoint id 51 collected  
[50:49] Charge balance equation is out by 7.1%  
[50:49] Stirrer speed set to 55  
[50:54] pH 5.68 -> 5.88  
[50:54] Using charge balance adjust  
[50:54] Dispensed 0.000588 mL of Base (0.5 M KOH)  
[51:14] Stirrer speed set to 0  
[51:26] Datapoint id 52 collected  
[51:26] Charge balance equation is out by -2.4%  
[51:26] Stirrer speed set to 55  
[51:31] pH 5.88 -> 6.08  
[51:31] Using charge balance adjust  
[51:32] Dispensed 0.000400 mL of Base (0.5 M KOH)  
[51:52] Stirrer speed set to 0  
[52:04] Datapoint id 53 collected  
[52:04] Charge balance equation is out by -12.9%  
[52:04] Stirrer speed set to 55  
[52:09] pH 6.06 -> 6.26  
[52:09] Using charge balance adjust  
[52:10] Dispensed 0.000306 mL of Base (0.5 M KOH)  
[52:30] Stirrer speed set to 0  
[52:53] Datapoint id 54 collected  
[52:53] Charge balance equation is out by 17.6%  
[52:53] Stirrer speed set to 55  
[52:58] pH 6.30 -> 6.50  
[52:58] Using cautious pH adjust  
[52:59] Dispensed 0.000094 mL of Base (0.5 M KOH)  
[53:04] Stepping pH = 6.32  
[53:04] Dispensed 0.000282 mL of Base (0.5 M KOH)  
[53:09] Stepping pH = 6.75  
[53:24] Stirrer speed set to 0  
[54:24] Datapoint id 55 collected  
[54:24] Charge balance equation is out by -87.2%  
[54:24] Stirrer speed set to 55  
[54:29] pH 7.05 -> 7.25  
[54:29] Using cautious pH adjust  
[54:29] Dispensed 0.000024 mL of Base (0.5 M KOH)  
[54:34] Stepping pH = 7.07  
[54:34] Dispensed 0.000071 mL of Base (0.5 M KOH)  
[54:39] Stepping pH = 7.11  
[54:39] Dispensed 0.000118 mL of Base (0.5 M KOH)

Sample name: **M15\_octanol**  
Assay name: **pH-metric high logP**  
Assay ID: **18C-03006**  
Filename: **C:\Sirius\_T3\Mehtap\20180302\_exp29\_logP\_T3-2\18C-03006\_M15\_octanol\_pH-metric high logP.t3r**

Experiment start time: **3/3/2018 8:26:22 AM**  
Analyst: **Pion**  
Instrument ID: **T312060**

## Experiment Log (continued)

[54:45] Stepping pH = 7.46  
[55:00] Stirrer speed set to 0  
[56:00] Datapoint id 56 collected  
[56:00] Charge balance equation is out by -289.0%  
[56:00] Stirrer speed set to 55  
[56:05] pH 7.69 -> 7.89  
[56:05] Using cautious pH adjust  
[56:05] Dispensed 0.000024 mL of Base (0.5 M KOH)  
[56:10] Stepping pH = 7.74  
[56:10] Dispensed 0.000024 mL of Base (0.5 M KOH)  
[56:15] Stepping pH = 7.79  
[56:15] Dispensed 0.000024 mL of Base (0.5 M KOH)  
[56:20] Stepping pH = 7.84  
[56:20] Dispensed 0.000024 mL of Base (0.5 M KOH)  
[56:25] Stepping pH = 7.93  
[56:40] Stirrer speed set to 0  
[57:40] Datapoint id 57 collected  
[57:40] Charge balance equation is out by -381.5%  
[57:40] Stirrer speed set to 55  
[57:45] pH 7.90 -> 8.10  
[57:45] Using cautious pH adjust  
[57:46] Dispensed 0.000024 mL of Base (0.5 M KOH)  
[57:51] Stepping pH = 7.94  
[57:51] Dispensed 0.000024 mL of Base (0.5 M KOH)  
[57:56] Stepping pH = 8.00  
[57:56] Dispensed 0.000024 mL of Base (0.5 M KOH)  
[58:01] Stepping pH = 8.08  
[58:01] Dispensed 0.000024 mL of Base (0.5 M KOH)  
[58:06] Stepping pH = 8.17  
[58:21] Stirrer speed set to 0  
[59:21] Datapoint id 58 collected  
[59:21] Charge balance equation is out by -472.6%  
[59:21] Stirrer speed set to 55  
[59:26] pH 8.19 -> 8.39  
[59:26] Using cautious pH adjust  
[59:26] Dispensed 0.000024 mL of Base (0.5 M KOH)  
[59:31] Stepping pH = 8.22  
[59:31] Dispensed 0.000024 mL of Base (0.5 M KOH)  
[59:37] Stepping pH = 8.27  
[59:37] Dispensed 0.000024 mL of Base (0.5 M KOH)  
[59:42] Stepping pH = 8.33  
[59:42] Dispensed 0.000024 mL of Base (0.5 M KOH)  
[59:47] Stepping pH = 8.37  
[59:47] Dispensed 0.000024 mL of Base (0.5 M KOH)  
[59:52] Stepping pH = 8.35  
[59:52] Dispensed 0.000071 mL of Base (0.5 M KOH)  
[59:57] Stepping pH = 8.58  
[1:00:12] Stirrer speed set to 0  
[1:00:49] Datapoint id 59 collected  
[1:00:49] Charge balance equation is out by -1,013.4%  
[1:00:49] Stirrer speed set to 55  
[1:00:54] pH 8.64 -> 8.84  
[1:00:54] Using cautious pH adjust  
[1:00:54] Dispensed 0.000024 mL of Base (0.5 M KOH)  
[1:00:59] Stepping pH = 8.66  
[1:00:59] Dispensed 0.000047 mL of Base (0.5 M KOH)  
[1:01:04] Stepping pH = 8.73  
[1:01:04] Dispensed 0.000047 mL of Base (0.5 M KOH)  
[1:01:09] Stepping pH = 8.83

Sample name: **M15\_octanol**  
Assay name: **pH-metric high logP**  
Assay ID: **18C-03006**  
Filename: **C:\Sirius\_T3\Mehtap\20180302\_exp29\_logP\_T3-2\18C-03006\_M15\_octanol\_pH-metric high logP.t3r**

Experiment start time: **3/3/2018 8:26:22 AM**  
Analyst: **Pion**  
Instrument ID: **T312060**

## Experiment Log (continued)

[1:01:09] Dispensed 0.000024 mL of Base (0.5 M KOH)  
[1:01:15] Stepping pH = 8.89  
[1:01:30] Stirrer speed set to 0  
[1:01:49] Datapoint id 60 collected  
[1:01:49] Charge balance equation is out by -319.6%  
[1:01:49] Stirrer speed set to 55  
[1:01:54] pH 8.89 -> 9.09  
[1:01:54] Using cautious pH adjust  
[1:01:54] Dispensed 0.000024 mL of Base (0.5 M KOH)  
[1:01:59] Stepping pH = 8.91  
[1:01:59] Dispensed 0.000071 mL of Base (0.5 M KOH)  
[1:02:04] Stepping pH = 8.99  
[1:02:05] Dispensed 0.000071 mL of Base (0.5 M KOH)  
[1:02:10] Stepping pH = 9.11  
[1:02:25] Stirrer speed set to 0  
[1:02:55] Datapoint id 61 collected  
[1:02:55] Charge balance equation is out by -216.7%  
[1:02:55] Stirrer speed set to 55  
[1:03:00] pH 9.15 -> 9.35  
[1:03:00] Using cautious pH adjust  
[1:03:00] Dispensed 0.000047 mL of Base (0.5 M KOH)  
[1:03:05] Stepping pH = 9.17  
[1:03:05] Dispensed 0.000141 mL of Base (0.5 M KOH)  
[1:03:10] Stepping pH = 9.37  
[1:03:25] Stirrer speed set to 0  
[1:03:38] Datapoint id 62 collected  
[1:03:38] Charge balance equation is out by -91.0%  
[1:03:38] Stirrer speed set to 55  
[1:03:43] pH 9.43 -> 9.63  
[1:03:43] Using cautious pH adjust  
[1:03:43] Dispensed 0.000071 mL of Base (0.5 M KOH)  
[1:03:48] Stepping pH = 9.45  
[1:03:48] Dispensed 0.000235 mL of Base (0.5 M KOH)  
[1:03:53] Stepping pH = 9.64  
[1:04:08] Stirrer speed set to 0  
[1:04:22] Datapoint id 63 collected  
[1:04:22] Charge balance equation is out by -92.6%  
[1:04:22] Stirrer speed set to 55  
[1:04:27] pH 9.71 -> 9.91  
[1:04:27] Using cautious pH adjust  
[1:04:27] Dispensed 0.000141 mL of Base (0.5 M KOH)  
[1:04:32] Stepping pH = 9.75  
[1:04:32] Dispensed 0.000235 mL of Base (0.5 M KOH)  
[1:04:37] Stepping pH = 9.91  
[1:04:53] Stirrer speed set to 0  
[1:05:11] Datapoint id 64 collected  
[1:05:11] Charge balance equation is out by -37.0%  
[1:05:11] Stirrer speed set to 55  
[1:05:16] pH 9.95 -> 10.05  
[1:05:16] Using cautious pH adjust  
[1:05:16] Dispensed 0.000094 mL of Base (0.5 M KOH)  
[1:05:21] Stepping pH = 9.95  
[1:05:21] Dispensed 0.000282 mL of Base (0.5 M KOH)  
[1:05:26] Stepping pH = 10.07  
[1:05:42] Stirrer speed set to 0  
[1:05:52] Datapoint id 65 collected  
[1:05:52] Charge balance equation is out by -89.5%  
[1:05:52] Titration 3 of 3  
[1:05:52] Adding initial titrants

Sample name: **M15\_octanol**  
Assay name: **pH-metric high logP**  
Assay ID: **18C-03006**  
Filename: **C:\Sirius\_T3\Mehtap\20180302\_exp29\_logP\_T3-2\18C-03006\_M15\_octanol\_pH-metric high logP.t3r**

Experiment start time: **3/3/2018 8:26:22 AM**  
Analyst: **Pion**  
Instrument ID: **T312060**

## Experiment Log (continued)

[1:05:52] Automatically add 0.30000 mL of Octanol  
[1:05:59] Dispensed 0.300000 mL of Octanol  
[1:05:59] Stirrer speed set to 10  
[1:06:00] Stirrer speed set to 60  
[1:06:00] Iterative adjust 10.11 -> 2.00  
[1:06:00] pH 10.11 -> 2.00  
[1:06:03] Dispensed 0.100000 mL of Acid (0.5 M HCl)  
[1:06:08] pH 2.07 -> 2.00  
[1:06:08] Dispensed 0.011642 mL of Acid (0.5 M HCl)  
[1:06:58] Stirrer speed set to 0  
[1:07:08] Datapoint id 66 collected  
[1:07:08] Stirrer speed set to 60  
[1:07:14] pH 1.98 -> 2.18  
[1:07:14] Using cautious pH adjust  
[1:07:14] Dispensed 0.014887 mL of Base (0.5 M KOH)  
[1:07:19] Stepping pH = 2.06  
[1:07:20] Dispensed 0.012512 mL of Base (0.5 M KOH)  
[1:07:25] Stepping pH = 2.15  
[1:07:25] Dispensed 0.003175 mL of Base (0.5 M KOH)  
[1:07:30] Stepping pH = 2.18  
[1:07:45] Stirrer speed set to 0  
[1:07:58] Datapoint id 67 collected  
[1:07:58] Charge balance equation is out by -2.6%  
[1:07:58] Stirrer speed set to 60  
[1:08:03] pH 2.19 -> 2.39  
[1:08:03] Using charge balance adjust  
[1:08:03] Dispensed 0.019120 mL of Base (0.5 M KOH)  
[1:08:23] Stirrer speed set to 0  
[1:08:33] Datapoint id 68 collected  
[1:08:33] Charge balance equation is out by -2.3%  
[1:08:33] Stirrer speed set to 60  
[1:08:39] pH 2.39 -> 2.59  
[1:08:39] Using charge balance adjust  
[1:08:39] Dispensed 0.012982 mL of Base (0.5 M KOH)  
[1:08:59] Stirrer speed set to 0  
[1:09:09] Datapoint id 69 collected  
[1:09:09] Charge balance equation is out by -8.3%  
[1:09:09] Stirrer speed set to 60  
[1:09:14] pH 2.58 -> 2.78  
[1:09:14] Using charge balance adjust  
[1:09:15] Dispensed 0.009266 mL of Base (0.5 M KOH)  
[1:09:35] Stirrer speed set to 0  
[1:09:45] Datapoint id 70 collected  
[1:09:45] Charge balance equation is out by 2.2%  
[1:09:45] Stirrer speed set to 60  
[1:09:50] pH 2.79 -> 2.99  
[1:09:50] Using charge balance adjust  
[1:09:50] Dispensed 0.006609 mL of Base (0.5 M KOH)  
[1:10:10] Stirrer speed set to 0  
[1:10:21] Datapoint id 71 collected  
[1:10:21] Charge balance equation is out by -5.3%  
[1:10:21] Stirrer speed set to 60  
[1:10:26] pH 2.98 -> 3.18  
[1:10:26] Using charge balance adjust  
[1:10:26] Dispensed 0.004986 mL of Base (0.5 M KOH)  
[1:10:46] Stirrer speed set to 0  
[1:10:57] Datapoint id 72 collected  
[1:10:57] Charge balance equation is out by -2.9%  
[1:10:57] Stirrer speed set to 60



Sample name: **M15\_octanol**  
Assay name: **pH-metric high logP**  
Assay ID: **18C-03006**  
Filename: **C:\Sirius\_T3\Mehtap\20180302\_exp29\_logP\_T3-2\18C-03006\_M15\_octanol\_pH-metric high logP.t3r**

Experiment start time: **3/3/2018 8:26:22 AM**  
Analyst: **Pion**  
Instrument ID: **T312060**

## Experiment Log (continued)

[1:11:02] pH 3.18 -> 3.38  
[1:11:02] Using charge balance adjust  
[1:11:02] Dispensed 0.003857 mL of Base (0.5 M KOH)  
[1:11:22] Stirrer speed set to 0  
[1:11:32] Datapoint id 73 collected  
[1:11:32] Charge balance equation is out by 9.5%  
[1:11:32] Stirrer speed set to 60  
[1:11:37] pH 3.41 -> 3.61  
[1:11:37] Using charge balance adjust  
[1:11:38] Dispensed 0.003104 mL of Base (0.5 M KOH)  
[1:11:58] Stirrer speed set to 0  
[1:12:08] Datapoint id 74 collected  
[1:12:08] Charge balance equation is out by 0.7%  
[1:12:08] Stirrer speed set to 60  
[1:12:13] pH 3.61 -> 3.81  
[1:12:13] Using charge balance adjust  
[1:12:13] Dispensed 0.002775 mL of Base (0.5 M KOH)  
[1:12:33] Stirrer speed set to 0  
[1:12:44] Datapoint id 75 collected  
[1:12:44] Charge balance equation is out by 12.4%  
[1:12:44] Stirrer speed set to 60  
[1:12:49] pH 3.83 -> 4.03  
[1:12:49] Using charge balance adjust  
[1:12:49] Dispensed 0.002658 mL of Base (0.5 M KOH)  
[1:13:09] Stirrer speed set to 0  
[1:13:27] Datapoint id 76 collected  
[1:13:27] Charge balance equation is out by 13.3%  
[1:13:27] Stirrer speed set to 60  
[1:13:33] pH 4.05 -> 4.25  
[1:13:33] Using charge balance adjust  
[1:13:33] Dispensed 0.002540 mL of Base (0.5 M KOH)  
[1:13:53] Stirrer speed set to 0  
[1:14:03] Datapoint id 77 collected  
[1:14:03] Charge balance equation is out by -4.8%  
[1:14:03] Stirrer speed set to 60  
[1:14:08] pH 4.24 -> 4.44  
[1:14:08] Using charge balance adjust  
[1:14:08] Dispensed 0.002375 mL of Base (0.5 M KOH)  
[1:14:28] Stirrer speed set to 0  
[1:14:38] Datapoint id 78 collected  
[1:14:38] Charge balance equation is out by 0.7%  
[1:14:38] Stirrer speed set to 60  
[1:14:44] pH 4.44 -> 4.64  
[1:14:44] Using charge balance adjust  
[1:14:44] Dispensed 0.002046 mL of Base (0.5 M KOH)  
[1:15:04] Stirrer speed set to 0  
[1:15:14] Datapoint id 79 collected  
[1:15:14] Charge balance equation is out by 0.9%  
[1:15:14] Stirrer speed set to 60  
[1:15:19] pH 4.64 -> 4.84  
[1:15:19] Using charge balance adjust  
[1:15:19] Dispensed 0.001646 mL of Base (0.5 M KOH)  
[1:15:39] Stirrer speed set to 0  
[1:16:00] Datapoint id 80 collected  
[1:16:00] Charge balance equation is out by 5.4%  
[1:16:00] Stirrer speed set to 60  
[1:16:05] pH 4.85 -> 5.05  
[1:16:05] Using charge balance adjust  
[1:16:05] Dispensed 0.001223 mL of Base (0.5 M KOH)

Sample name: **M15\_octanol**  
Assay name: **pH-metric high logP**  
Assay ID: **18C-03006**  
Filename: **C:\Sirius\_T3\Mehtap\20180302\_exp29\_logP\_T3-2\18C-03006\_M15\_octanol\_pH-metric high logP.t3r**

Experiment start time: **3/3/2018 8:26:22 AM**  
Analyst: **Pion**  
Instrument ID: **T312060**

## Experiment Log (continued)

[1:16:25] Stirrer speed set to 0  
[1:16:44] Datapoint id 81 collected  
[1:16:44] Charge balance equation is out by 18.8%  
[1:16:44] Stirrer speed set to 60  
[1:16:49] pH 5.09 -> 5.29  
[1:16:49] Using cautious pH adjust  
[1:16:49] Dispensed 0.000400 mL of Base (0.5 M KOH)  
[1:16:55] Stepping pH = 5.16  
[1:16:55] Dispensed 0.000447 mL of Base (0.5 M KOH)  
[1:17:00] Stepping pH = 5.28  
[1:17:00] Dispensed 0.000047 mL of Base (0.5 M KOH)  
[1:17:05] Stepping pH = 5.31  
[1:17:20] Stirrer speed set to 0  
[1:17:31] Datapoint id 82 collected  
[1:17:31] Charge balance equation is out by -9.2%  
[1:17:31] Stirrer speed set to 60  
[1:17:36] pH 5.32 -> 5.52  
[1:17:36] Using charge balance adjust  
[1:17:36] Dispensed 0.000541 mL of Base (0.5 M KOH)  
[1:17:56] Stirrer speed set to 0  
[1:18:08] Datapoint id 83 collected  
[1:18:08] Charge balance equation is out by 10.6%  
[1:18:08] Stirrer speed set to 60  
[1:18:13] pH 5.55 -> 5.75  
[1:18:13] Using charge balance adjust  
[1:18:13] Dispensed 0.000353 mL of Base (0.5 M KOH)  
[1:18:33] Stirrer speed set to 0  
[1:18:51] Datapoint id 84 collected  
[1:18:51] Charge balance equation is out by 9.2%  
[1:18:51] Stirrer speed set to 60  
[1:18:56] pH 5.77 -> 5.97  
[1:18:56] Using charge balance adjust  
[1:18:57] Dispensed 0.000235 mL of Base (0.5 M KOH)  
[1:19:17] Stirrer speed set to 0  
[1:19:32] Datapoint id 85 collected  
[1:19:32] Charge balance equation is out by -5.5%  
[1:19:32] Stirrer speed set to 60  
[1:19:37] pH 5.96 -> 6.16  
[1:19:37] Using charge balance adjust  
[1:19:37] Dispensed 0.000188 mL of Base (0.5 M KOH)  
[1:19:57] Stirrer speed set to 0  
[1:20:27] Datapoint id 86 collected  
[1:20:27] Charge balance equation is out by 5.3%  
[1:20:27] Stirrer speed set to 60  
[1:20:32] pH 6.18 -> 6.38  
[1:20:32] Using charge balance adjust  
[1:20:32] Dispensed 0.000141 mL of Base (0.5 M KOH)  
[1:20:53] Stirrer speed set to 0  
[1:21:52] Datapoint id 87 collected  
[1:21:52] Charge balance equation is out by 37.0%  
[1:21:52] Stirrer speed set to 60  
[1:21:57] pH 6.45 -> 6.65  
[1:21:57] Using cautious pH adjust  
[1:21:57] Dispensed 0.000047 mL of Base (0.5 M KOH)  
[1:22:02] Stepping pH = 6.47  
[1:22:02] Dispensed 0.000141 mL of Base (0.5 M KOH)  
[1:22:08] Stepping pH = 6.91  
[1:22:23] Stirrer speed set to 0  
[1:23:23] Datapoint id 88 collected



Sample name: **M15\_octanol**  
Assay name: **pH-metric high logP**  
Assay ID: **18C-03006**  
Filename: **C:\Sirius\_T3\Mehtap\20180302\_exp29\_logP\_T3-2\18C-03006\_M15\_octanol\_pH-metric high logP.t3r**

Experiment start time: **3/3/2018 8:26:22 AM**  
Analyst: **Pion**  
Instrument ID: **T312060**

## Experiment Log (continued)

[1:23:23] Charge balance equation is out by -88.9%  
[1:23:23] Stirrer speed set to 60  
[1:23:28] pH 7.01 -> 7.21  
[1:23:28] Using cautious pH adjust  
[1:23:28] Dispensed 0.000024 mL of Base (0.5 M KOH)  
[1:23:33] Stepping pH = 7.02  
[1:23:33] Dispensed 0.000071 mL of Base (0.5 M KOH)  
[1:23:38] Stepping pH = 7.16  
[1:23:38] Dispensed 0.000024 mL of Base (0.5 M KOH)  
[1:23:43] Stepping pH = 7.31  
[1:23:58] Stirrer speed set to 0  
[1:24:58] Datapoint id 89 collected  
[1:24:58] Charge balance equation is out by -137.7%  
[1:24:58] Stirrer speed set to 60  
[1:25:03] pH 7.32 -> 7.52  
[1:25:03] Using cautious pH adjust  
[1:25:03] Dispensed 0.000024 mL of Base (0.5 M KOH)  
[1:25:09] Stepping pH = 7.42  
[1:25:09] Dispensed 0.000024 mL of Base (0.5 M KOH)  
[1:25:14] Stepping pH = 7.52  
[1:25:29] Stirrer speed set to 0  
[1:26:29] Datapoint id 90 collected  
[1:26:29] Charge balance equation is out by -46.2%  
[1:26:29] Stirrer speed set to 60  
[1:26:34] pH 7.52 -> 7.72  
[1:26:34] Using cautious pH adjust  
[1:26:34] Dispensed 0.000024 mL of Base (0.5 M KOH)  
[1:26:39] Stepping pH = 7.60  
[1:26:39] Dispensed 0.000024 mL of Base (0.5 M KOH)  
[1:26:44] Stepping pH = 7.66  
[1:26:44] Dispensed 0.000024 mL of Base (0.5 M KOH)  
[1:26:49] Stepping pH = 7.76  
[1:27:04] Stirrer speed set to 0  
[1:28:04] Datapoint id 91 collected  
[1:28:04] Charge balance equation is out by -201.7%  
[1:28:04] Stirrer speed set to 60  
[1:28:10] pH 7.83 -> 8.03  
[1:28:10] Using cautious pH adjust  
[1:28:10] Dispensed 0.000024 mL of Base (0.5 M KOH)  
[1:28:15] Stepping pH = 7.86  
[1:28:15] Dispensed 0.000024 mL of Base (0.5 M KOH)  
[1:28:20] Stepping pH = 7.99  
[1:28:20] Dispensed 0.000024 mL of Base (0.5 M KOH)  
[1:28:25] Stepping pH = 8.13  
[1:28:40] Stirrer speed set to 0  
[1:29:40] Datapoint id 92 collected  
[1:29:40] Charge balance equation is out by -321.0%  
[1:29:40] Stirrer speed set to 60  
[1:29:45] pH 8.07 -> 8.27  
[1:29:45] Using cautious pH adjust  
[1:29:45] Dispensed 0.000024 mL of Base (0.5 M KOH)  
[1:29:50] Stepping pH = 8.07  
[1:29:50] Dispensed 0.000047 mL of Base (0.5 M KOH)  
[1:29:55] Stepping pH = 8.24  
[1:29:56] Dispensed 0.000024 mL of Base (0.5 M KOH)  
[1:30:01] Stepping pH = 8.36  
[1:30:16] Stirrer speed set to 0  
[1:31:16] Datapoint id 93 collected  
[1:31:16] Charge balance equation is out by -434.1%

Sample name: **M15\_octanol**  
Assay name: **pH-metric high logP**  
Assay ID: **18C-03006**  
Filename: **C:\Sirius\_T3\Mehtap\20180302\_exp29\_logP\_T3-2\18C-03006\_M15\_octanol\_pH-metric high logP.t3r**

Experiment start time: **3/3/2018 8:26:22 AM**  
Analyst: **Pion**  
Instrument ID: **T312060**

## Experiment Log (continued)

[1:31:16] Stirrer speed set to 60  
[1:31:21] pH 8.37 -> 8.57  
[1:31:21] Using cautious pH adjust  
[1:31:21] Dispensed 0.000024 mL of Base (0.5 M KOH)  
[1:31:26] Stepping pH = 8.37  
[1:31:26] Dispensed 0.000024 mL of Base (0.5 M KOH)  
[1:31:31] Stepping pH = 8.37  
[1:31:31] Dispensed 0.000165 mL of Base (0.5 M KOH)  
[1:31:36] Stepping pH = 8.72  
[1:31:51] Stirrer speed set to 0  
[1:32:12] Datapoint id 94 collected  
[1:32:12] Charge balance equation is out by -893.2%  
[1:32:12] Stirrer speed set to 60  
[1:32:18] pH 8.83 -> 9.03  
[1:32:18] Using cautious pH adjust  
[1:32:18] Dispensed 0.000024 mL of Base (0.5 M KOH)  
[1:32:23] Stepping pH = 8.84  
[1:32:23] Dispensed 0.000071 mL of Base (0.5 M KOH)  
[1:32:28] Stepping pH = 8.87  
[1:32:28] Dispensed 0.000165 mL of Base (0.5 M KOH)  
[1:32:33] Stepping pH = 9.03  
[1:32:48] Stirrer speed set to 0  
[1:33:16] Datapoint id 95 collected  
[1:33:16] Charge balance equation is out by -410.9%  
[1:33:16] Stirrer speed set to 60  
[1:33:21] pH 9.09 -> 9.29  
[1:33:21] Using cautious pH adjust  
[1:33:21] Dispensed 0.000047 mL of Base (0.5 M KOH)  
[1:33:26] Stepping pH = 9.10  
[1:33:26] Dispensed 0.000118 mL of Base (0.5 M KOH)  
[1:33:31] Stepping pH = 9.14  
[1:33:31] Dispensed 0.000212 mL of Base (0.5 M KOH)  
[1:33:36] Stepping pH = 9.32  
[1:33:51] Stirrer speed set to 0  
[1:34:06] Datapoint id 96 collected  
[1:34:06] Charge balance equation is out by -341.4%  
[1:34:06] Stirrer speed set to 60  
[1:34:11] pH 9.38 -> 9.58  
[1:34:11] Using cautious pH adjust  
[1:34:11] Dispensed 0.000071 mL of Base (0.5 M KOH)  
[1:34:16] Stepping pH = 9.39  
[1:34:16] Dispensed 0.000235 mL of Base (0.5 M KOH)  
[1:34:21] Stepping pH = 9.52  
[1:34:21] Dispensed 0.000094 mL of Base (0.5 M KOH)  
[1:34:26] Stepping pH = 9.60  
[1:34:42] Stirrer speed set to 0  
[1:34:54] Datapoint id 97 collected  
[1:34:54] Charge balance equation is out by -153.1%  
[1:34:54] Stirrer speed set to 60  
[1:34:59] pH 9.62 -> 9.82  
[1:34:59] Using cautious pH adjust  
[1:34:59] Dispensed 0.000118 mL of Base (0.5 M KOH)  
[1:35:04] Stepping pH = 9.66  
[1:35:04] Dispensed 0.000235 mL of Base (0.5 M KOH)  
[1:35:10] Stepping pH = 9.78  
[1:35:10] Dispensed 0.000071 mL of Base (0.5 M KOH)  
[1:35:15] Stepping pH = 9.83  
[1:35:30] Stirrer speed set to 0  
[1:35:51] Datapoint id 98 collected



|              |                                                                                                   |                        |                            |
|--------------|---------------------------------------------------------------------------------------------------|------------------------|----------------------------|
| Sample name: | <b>M15_octanol</b>                                                                                | Experiment start time: | <b>3/3/2018 8:26:22 AM</b> |
| Assay name:  | <b>pH-metric high logP</b>                                                                        | Analyst:               | <b>Pion</b>                |
| Assay ID:    | <b>18C-03006</b>                                                                                  | Instrument ID:         | <b>T312060</b>             |
| Filename:    | <b>C:\Sirius_T3\Mehtap\20180302_exp29_logP_T3-2\18C-03006_M15_octanol_pH-metric high logP.t3r</b> |                        |                            |

### Experiment Log (continued)

[1:35:51] Charge balance equation is out by -75.4%  
[1:35:51] Stirrer speed set to 60  
[1:35:57] pH 9.84 -> 10.04  
[1:35:57] Using cautious pH adjust  
[1:35:57] Dispensed 0.000188 mL of Base (0.5 M KOH)  
[1:36:02] Stepping pH = 9.90  
[1:36:02] Dispensed 0.000235 mL of Base (0.5 M KOH)  
[1:36:07] Stepping pH = 10.00  
[1:36:07] Dispensed 0.000094 mL of Base (0.5 M KOH)  
[1:36:12] Stepping pH = 10.04  
[1:36:27] Stirrer speed set to 0  
[1:36:39] Datapoint id 99 collected  
[1:36:39] Charge balance equation is out by -35.9%  
[1:36:39] Argon flow rate set to 0  
[1:36:43] Titrator arm moved over Titration position
