# Supplementary material for: Octanol-water partition coefficient measurements for the SAMPL6 Blind Prediction Challenge
Source: bioRxiv or medRxiv preprint supplement (doi:10.1101/757393), 2019-12-02
Supplement: Supplementary file [file media-2.zip]

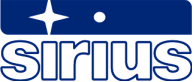

Sample name: **M02\_octanol** Experiment start time: **3/1/2018 2:44:22 PM**  
Assay name: **pH-metric high logP** Analyst: **Dorothy Levorse**  
Assay ID: **18C-01011** Instrument ID: **T312060**  
Filename: **C:\Sirius\_T3\Mehtap\20180228\_exp28\_logP\_T3-2\18C-01011\_M02\_octanol\_pH-metric high logP.t3r**

**pH-metric Result**

logP (XH +) 1.32 ±0.06 (n=50)  
logP (neutral X) 4.10 ±0.03 (n=50)

**18C-01011 Points 1 to 16**

M02\_octanol concentration factor 0.688  
Carbonate 0.0278 mM  
Acidity error -0.23518 mM

**18C-01011 Points 17 to 26**

M02\_octanol concentration factor 0.751  
Carbonate 0.1291 mM  
Acidity error -0.36000 mM

**18C-01011 Points 27 to 42**

M02\_octanol concentration factor 0.599  
Carbonate 0.0511 mM  
Acidity error -0.26646 mM

**Warnings and errors**

Errors None  
Warnings None

**Sample logD and percent species**

| pH     | M02_octanol<br>logD | M02_octanol<br>M02_octanolH | M02_octanol<br>M02_octanol | M02_octanol<br>M02_octanolH* | M02_octanol<br>M02_octanol* | Comment    |
|--------|---------------------|-----------------------------|----------------------------|------------------------------|-----------------------------|------------|
| 1.000  | 1.34                | 4.34 %                      | 0.00 %                     | 90.61 %                      | 5.05 %                      | Stomach pH |
| 1.200  | 1.36                | 4.22 %                      | 0.00 %                     | 88.01 %                      | 7.77 %                      |            |
| 2.000  | 1.51                | 2.99 %                      | 0.00 %                     | 62.31 %                      | 34.70 %                     |            |
| 3.000  | 2.13                | 0.72 %                      | 0.01 %                     | 15.11 %                      | 84.16 %                     |            |
| 4.000  | 3.03                | 0.08 %                      | 0.01 %                     | 1.76 %                       | 98.15 %                     |            |
| 5.000  | 3.78                | 0.01 %                      | 0.01 %                     | 0.18 %                       | 99.80 %                     | Blood pH   |
| 6.000  | 4.05                | 0.00 %                      | 0.01 %                     | 0.02 %                       | 99.97 %                     |            |
| 6.500  | 4.08                | 0.00 %                      | 0.01 %                     | 0.01 %                       | 99.99 %                     |            |
| 7.000  | 4.09                | 0.00 %                      | 0.01 %                     | 0.00 %                       | 99.99 %                     |            |
| 7.400  | 4.09                | 0.00 %                      | 0.01 %                     | 0.00 %                       | 99.99 %                     |            |
| 8.000  | 4.09                | 0.00 %                      | 0.01 %                     | 0.00 %                       | 99.99 %                     |            |
| 9.000  | 4.10                | 0.00 %                      | 0.01 %                     | 0.00 %                       | 99.99 %                     |            |
| 10.000 | 4.10                | 0.00 %                      | 0.01 %                     | 0.00 %                       | 99.99 %                     |            |
| 11.000 | 4.10                | 0.00 %                      | 0.01 %                     | 0.00 %                       | 99.99 %                     |            |
| 12.000 | 4.10                | 0.00 %                      | 0.01 %                     | 0.00 %                       | 99.99 %                     |            |

Sample name: **M02\_octanol**  
 Assay name: **pH-metric high logP**  
 Assay ID: **18C-01011**  
 Filename: **C:\Sirius\_T3\Mehtap\20180228\_exp28\_logP\_T3-2\18C-01011\_M02\_octanol\_pH-metric high logP.t3r**

Experiment start time: **3/1/2018 2:44:22 PM**  
 Analyst: **Dorothy Levorse**  
 Instrument ID: **T312060**

## Graphs

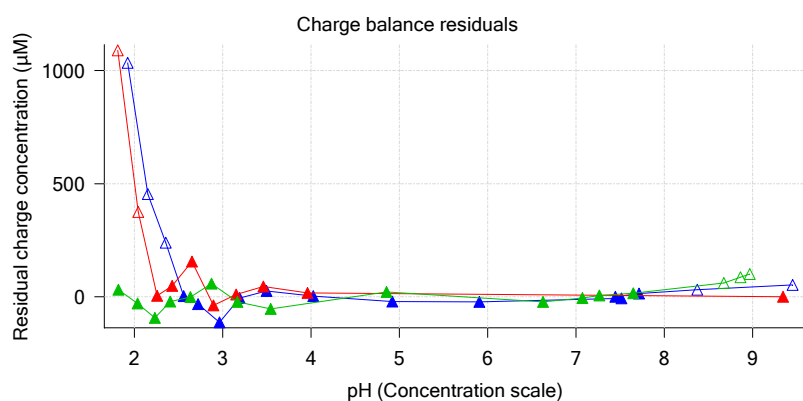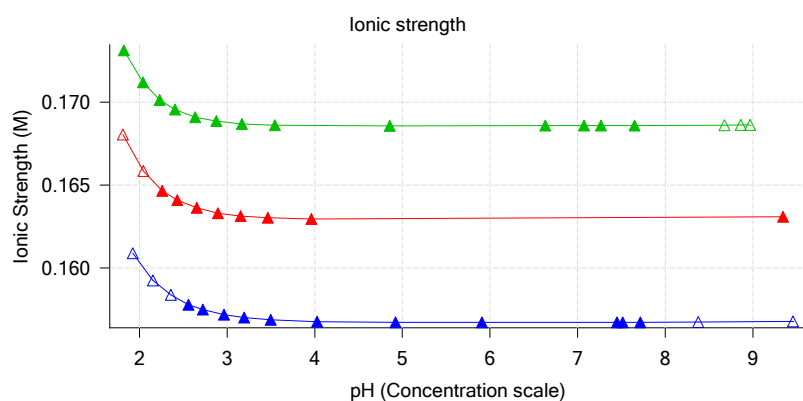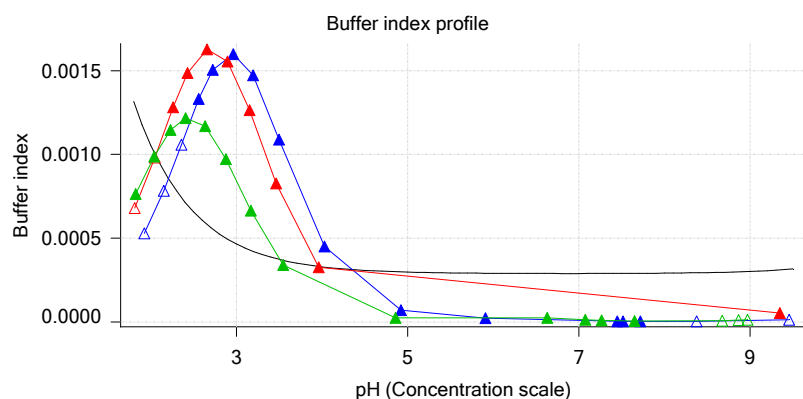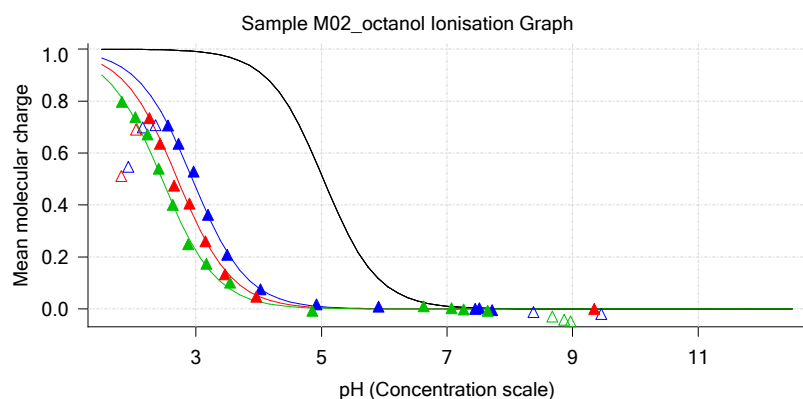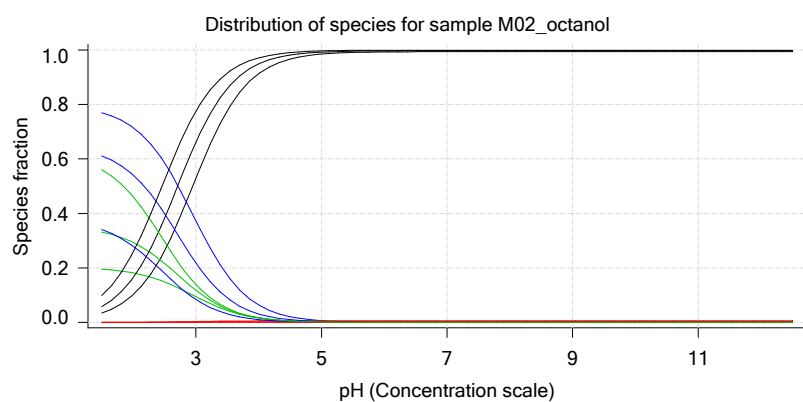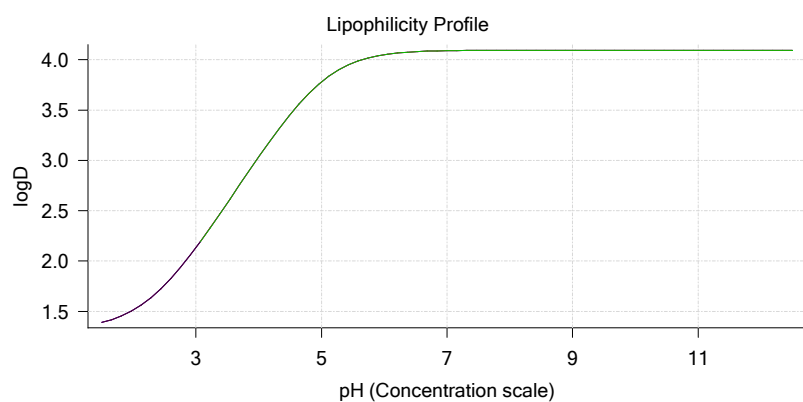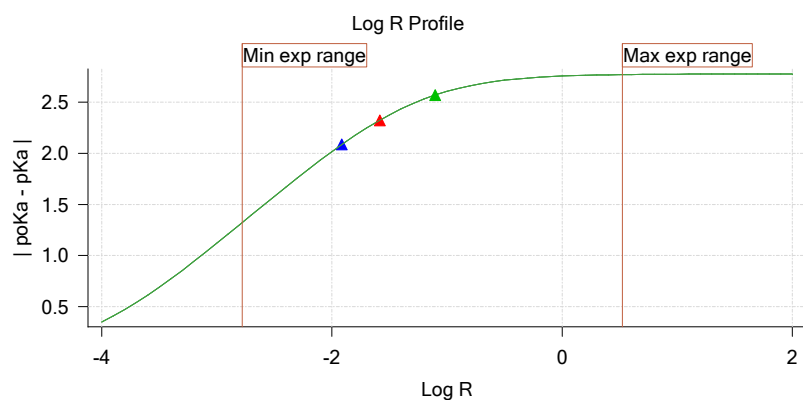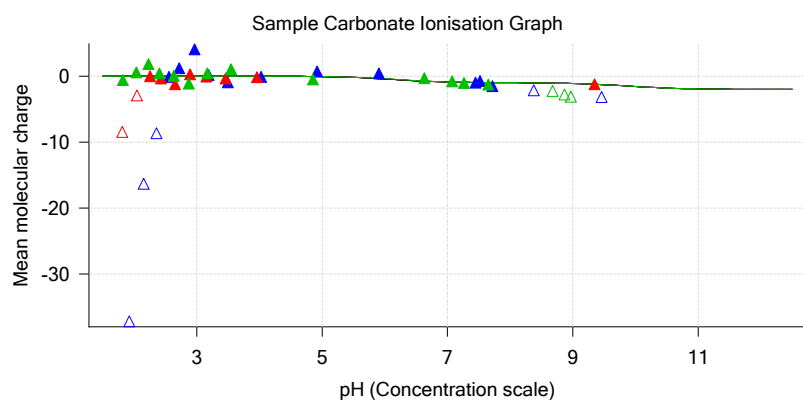

Sample name: **M02\_octanol**  
 Assay name: **pH-metric high logP**  
 Assay ID: **18C-01011**  
 Filename: **C:\Sirius\_T3\Mehtap\20180228\_exp28\_logP\_T3-2\18C-01011\_M02\_octanol\_pH-metric high logP.t3r**

Experiment start time: **3/1/2018 2:44:22 PM**  
 Analyst: **Dorothy Levorse**  
 Instrument ID: **T312060**

## Graphs (continued)

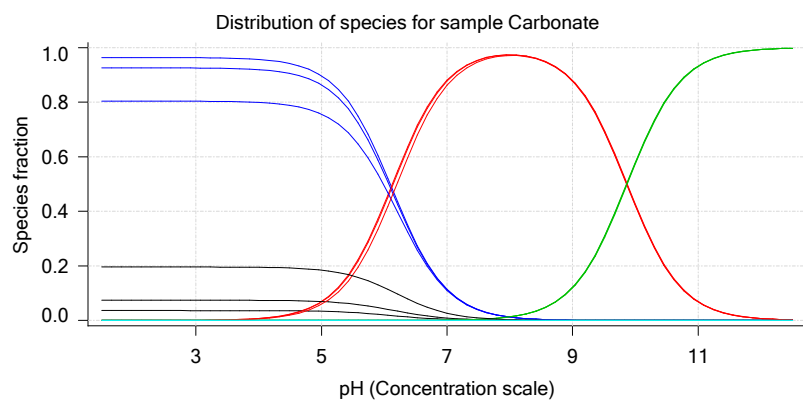

Sample name: **M02\_octanol**  
 Assay name: **pH-metric high logP**  
 Assay ID: **18C-01011**  
 Filename: **C:\Sirius\_T3\Mehtap\20180228\_exp28\_logP\_T3-2\18C-01011\_M02\_octanol\_pH-metric high logP.t3r**

Experiment start time: **3/1/2018 2:44:22 PM**  
 Analyst: **Dorothy Levorse**  
 Instrument ID: **T312060**

## pH-metric high logP Titration 1 of 3 18C-01011 Points 1 to 16

### Overall results

RMSD 1.164  
 Average ionic strength 0.157 M  
 Average temperature 24.9°C  
 Partition ratio 0.0122 : 1  
 Analyte concentration range 3971.1 µM to 4077.5 µM  
 Total points considered 11 of 16

### Warnings and errors

Errors None  
 Warnings Sample concentration factor out of range

### Four-Plus parameters

Alpha 0.130 3/1/2018 2:44:22 PM C:\Sirius\_T3\HCl18B27.t3r  
 S 0.9970 3/1/2018 2:44:22 PM C:\Sirius\_T3\HCl18B27.t3r  
 jH 0.8 3/1/2018 2:44:22 PM C:\Sirius\_T3\HCl18B27.t3r  
 jOH -0.4 3/1/2018 2:44:22 PM C:\Sirius\_T3\HCl18B27.t3r

### Titrants

0.50 M HCl 0.993513 3/1/2018 2:44:22 PM C:\Sirius\_T3\HCl18B27.t3r  
 0.50 M KOH 0.999845 3/1/2018 2:44:22 PM C:\Sirius\_T3\KOH18B27.t3r

### Sample

M02\_octanol concentration factor 0.688  
 Base pKa 1 5.03  
 logP (XH +) 1.60  
 logP (neutral X) 4.15

### Sample graphs

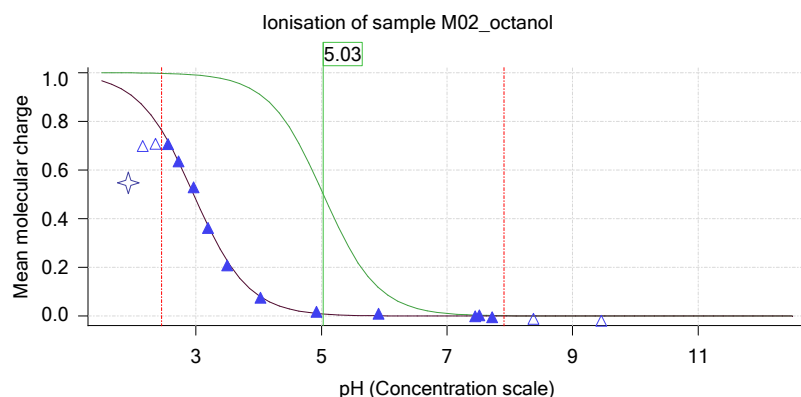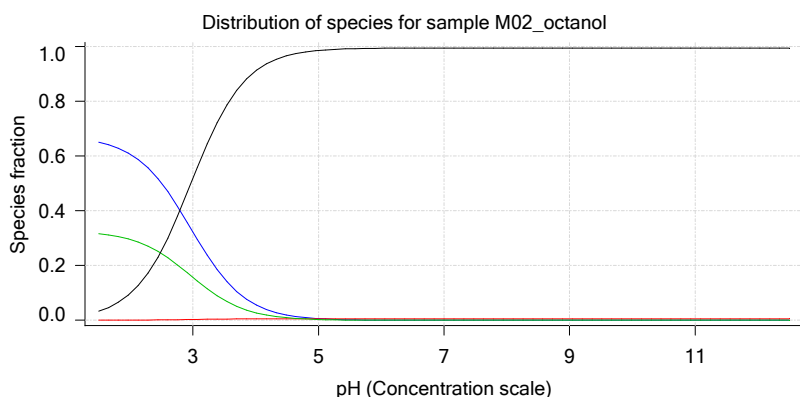

Sample name: **M02\_octanol**  
 Assay name: **pH-metric high logP**  
 Assay ID: **18C-01011**  
 Filename: **C:\Sirius\_T3\Mehtap\20180228\_exp28\_logP\_T3-2\18C-01011\_M02\_octanol\_pH-metric high logP.t3r**

Experiment start time: **3/1/2018 2:44:22 PM**  
 Analyst: **Dorothy Levorse**  
 Instrument ID: **T312060**

## Sample graphs (continued)

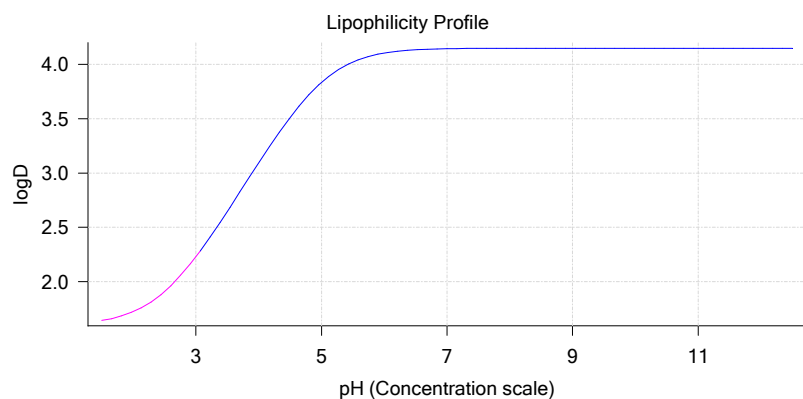

## Sample logD and percent species

| pH     | M02_octanol<br>logD | M02_octanol<br>M02_octanolH | M02_octanol<br>M02_octanolH | M02_octanol<br>M02_octanolH* | M02_octanol<br>M02_octanol* | Comment    |
|--------|---------------------|-----------------------------|-----------------------------|------------------------------|-----------------------------|------------|
| 1.000  | 1.61                | 66.58 %                     | 0.01 %                      | 32.35 %                      | 1.07 %                      | Stomach pH |
| 1.200  | 1.62                | 66.16 %                     | 0.01 %                      | 32.15 %                      | 1.68 %                      |            |
| 2.000  | 1.72                | 60.71 %                     | 0.06 %                      | 29.50 %                      | 9.74 %                      |            |
| 3.000  | 2.23                | 32.27 %                     | 0.30 %                      | 15.68 %                      | 51.75 %                     |            |
| 4.000  | 3.09                | 5.68 %                      | 0.53 %                      | 2.76 %                       | 91.04 %                     |            |
| 5.000  | 3.83                | 0.61 %                      | 0.57 %                      | 0.30 %                       | 98.51 %                     | Blood pH   |
| 6.000  | 4.10                | 0.06 %                      | 0.58 %                      | 0.03 %                       | 99.33 %                     |            |
| 6.500  | 4.13                | 0.02 %                      | 0.58 %                      | 0.01 %                       | 99.39 %                     |            |
| 7.000  | 4.14                | 0.01 %                      | 0.58 %                      | 0.00 %                       | 99.41 %                     |            |
| 7.400  | 4.15                | 0.00 %                      | 0.58 %                      | 0.00 %                       | 99.42 %                     |            |
| 8.000  | 4.15                | 0.00 %                      | 0.58 %                      | 0.00 %                       | 99.42 %                     |            |
| 9.000  | 4.15                | 0.00 %                      | 0.58 %                      | 0.00 %                       | 99.42 %                     |            |
| 10.000 | 4.15                | 0.00 %                      | 0.58 %                      | 0.00 %                       | 99.42 %                     |            |
| 11.000 | 4.15                | 0.00 %                      | 0.58 %                      | 0.00 %                       | 99.42 %                     |            |
| 12.000 | 4.15                | 0.00 %                      | 0.58 %                      | 0.00 %                       | 99.42 %                     |            |

## Carbonate and acidity

 Carbonate 0.028 mM  
 Acidity error -0.235 mM

## Other graphs

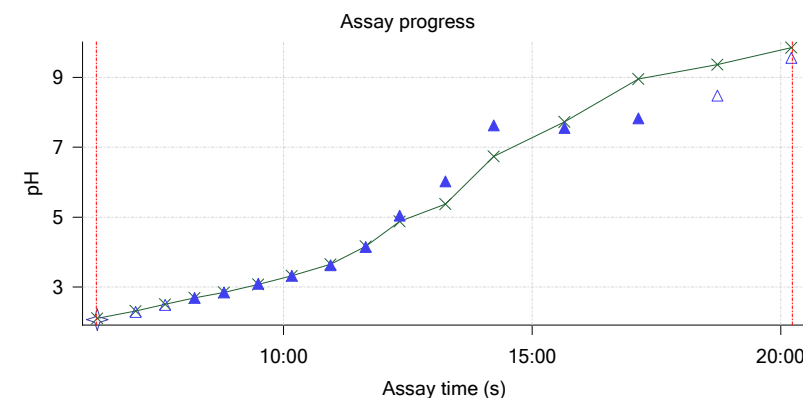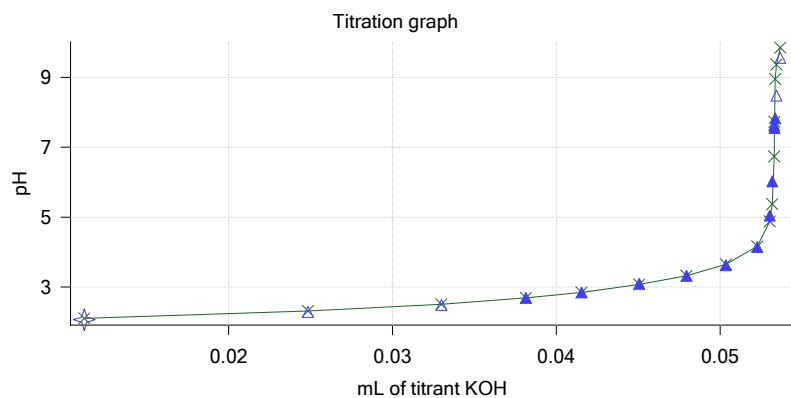

Sample name: **M02\_octanol**  
 Assay name: **pH-metric high logP**  
 Assay ID: **18C-01011**  
 Filename: **C:\Sirius\_T3\Mehtap\20180228\_exp28\_logP\_T3-2\18C-01011\_M02\_octanol\_pH-metric high logP.t3r**

Experiment start time: **3/1/2018 2:44:22 PM**  
 Analyst: **Dorothy Levorse**  
 Instrument ID: **T312060**

## Other graphs (continued)

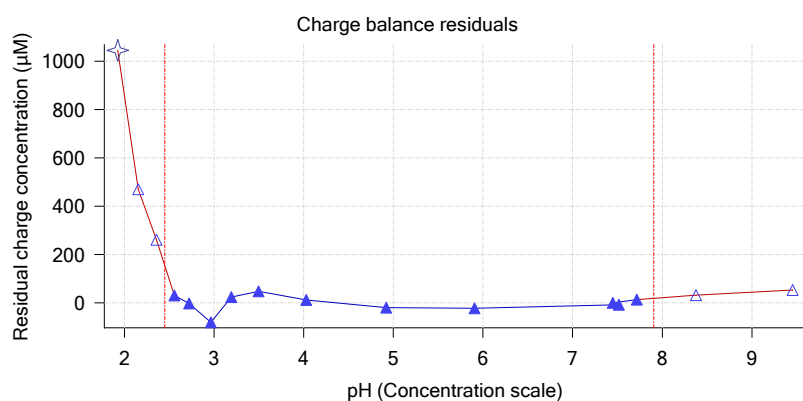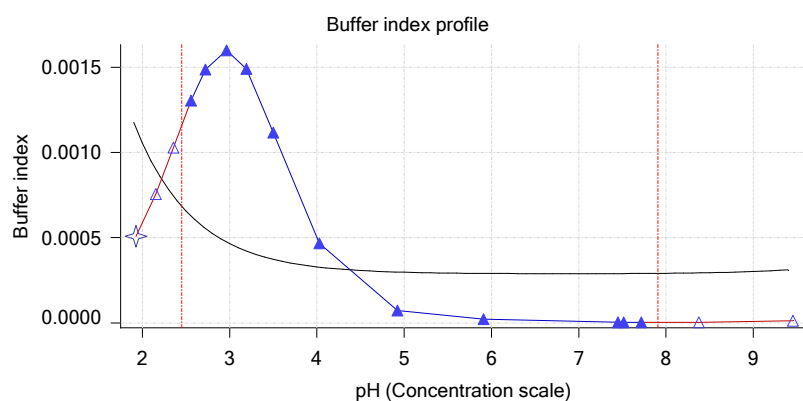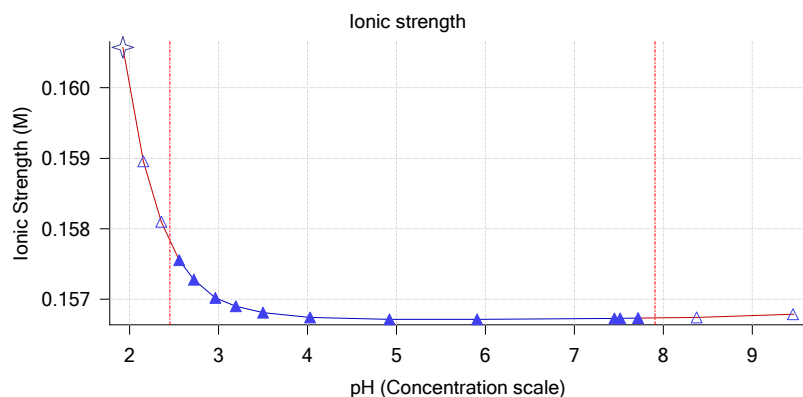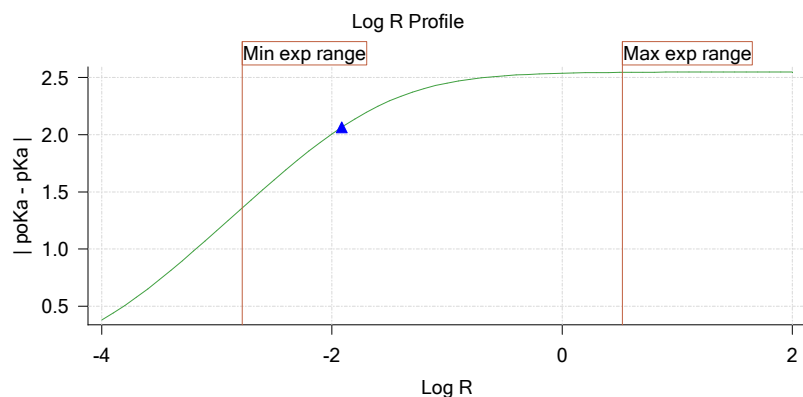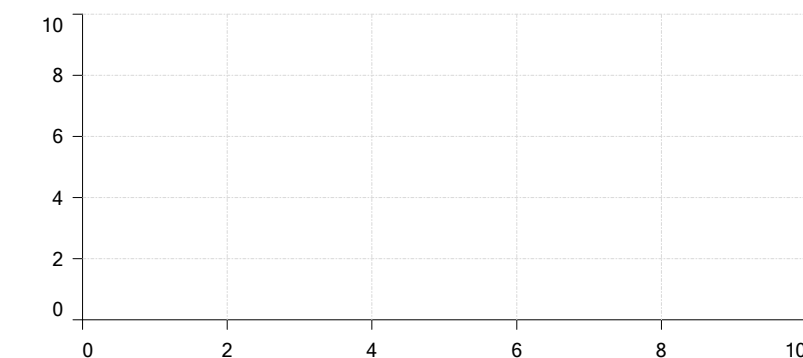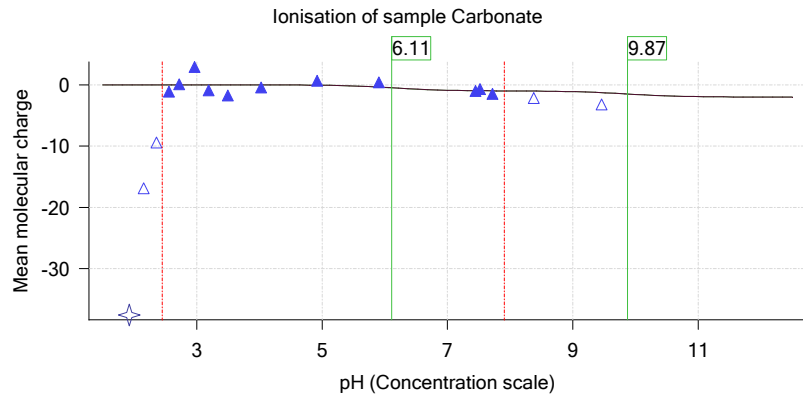

Sample name: **M02\_octanol**  
 Assay name: **pH-metric high logP**  
 Assay ID: **18C-01011**  
 Filename: **C:\Sirius\_T3\Mehtap\20180228\_exp28\_logP\_T3-2\18C-01011\_M02\_octanol\_pH-metric high logP.t3r**

Experiment start time: **3/1/2018 2:44:22 PM**  
 Analyst: **Dorothy Levorse**  
 Instrument ID: **T312060**

## pH-metric high logP Titration 2 of 3 18C-01011 Points 17 to 26

### Overall results

RMSD 0.012  
 Average ionic strength 0.163 M  
 Average temperature 25.0°C  
 Partition ratio 0.0260 : 1  
 Analyte concentration range 3657.5 µM to 3779.3 µM  
 Total points considered 8 of 10

### Warnings and errors

Errors None  
 Warnings None

### Four-Plus parameters

Alpha 0.130 3/1/2018 2:44:22 PM C:\Sirius\_T3\HCl18B27.t3r  
 S 0.9970 3/1/2018 2:44:22 PM C:\Sirius\_T3\HCl18B27.t3r  
 jH 0.8 3/1/2018 2:44:22 PM C:\Sirius\_T3\HCl18B27.t3r  
 jOH -0.4 3/1/2018 2:44:22 PM C:\Sirius\_T3\HCl18B27.t3r

### Titrants

0.50 M HCl 0.993513 3/1/2018 2:44:22 PM C:\Sirius\_T3\HCl18B27.t3r  
 0.50 M KOH 0.999845 3/1/2018 2:44:22 PM C:\Sirius\_T3\KOH18B27.t3r

### Sample

M02\_octanol concentration factor 0.751  
 Base pKa 1 5.03  
 logP (XH +) 1.60  
 logP (neutral X) 4.25

### Sample graphs

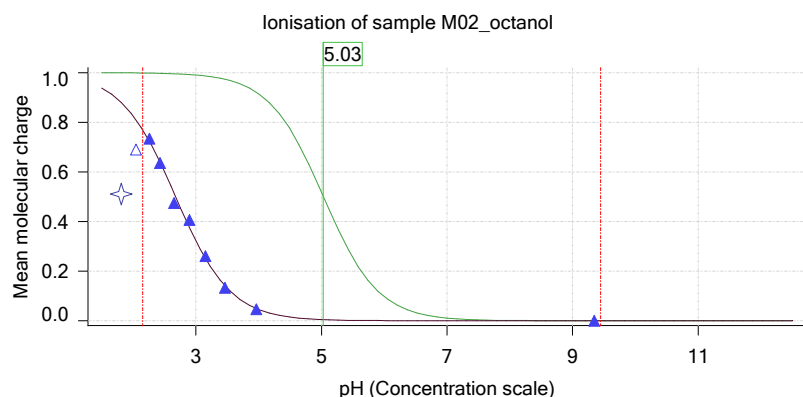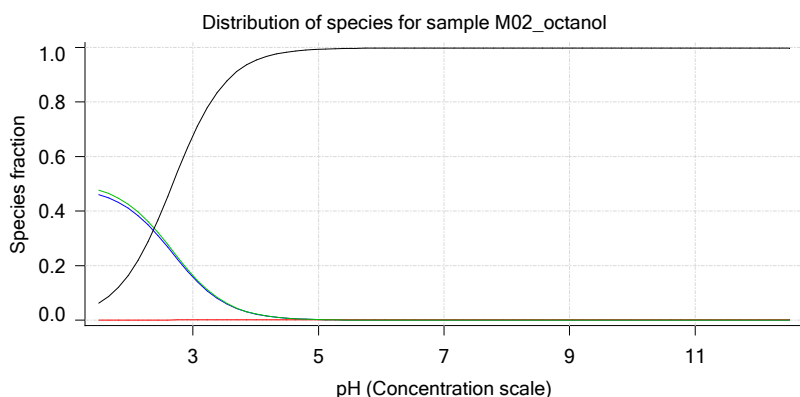

Sample name: **M02\_octanol**  
Assay name: **pH-metric high logP**  
Assay ID: **18C-01011**  
Filename: **C:\Sirius\_T3\Mehtap\20180228\_exp28\_logP\_T3-2\18C-01011\_M02\_octanol\_pH-metric high logP.t3r**

Experiment start time: **3/1/2018 2:44:22 PM**  
Analyst: **Dorothy Levorse**  
Instrument ID: **T312060**

## Sample graphs (continued)

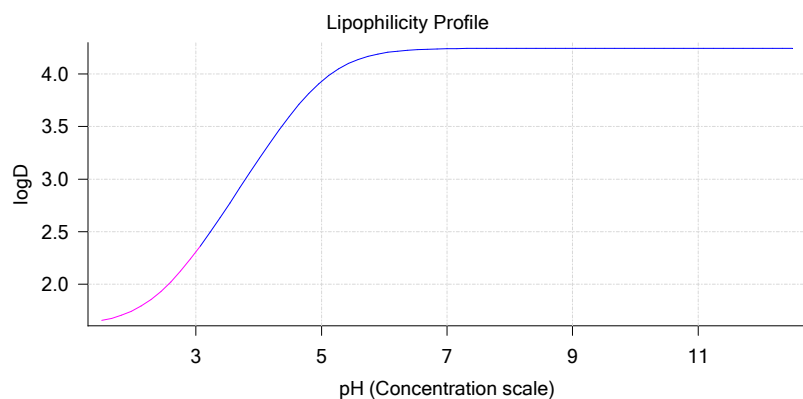

## Sample logD and percent species

| pH     | M02_octanol<br>logD | M02_octanol<br>M02_octanolH | M02_octanol<br>M02_octanolH | M02_octanol<br>M02_octanolH* | M02_octanol<br>M02_octanol* | Comment |
|--------|---------------------|-----------------------------|-----------------------------|------------------------------|-----------------------------|---------|
| 1.000  | 1.62                | 48.12 %                     | 0.00 %                      | 49.81 %                      | 2.06 %                      |         |
| 1.200  | 1.63                | 47.55 %                     | 0.01 %                      | 49.22 %                      | 3.23 %                      |         |
| 2.000  | 1.75                | 40.58 %                     | 0.04 %                      | 42.01 %                      | 17.38 %                     |         |
| 3.000  | 2.31                | 15.81 %                     | 0.15 %                      | 16.36 %                      | 67.68 %                     |         |
| 4.000  | 3.19                | 2.22 %                      | 0.21 %                      | 2.30 %                       | 95.26 %                     |         |
| 5.000  | 3.93                | 0.23 %                      | 0.22 %                      | 0.24 %                       | 99.31 %                     |         |
| 6.000  | 4.20                | 0.02 %                      | 0.22 %                      | 0.02 %                       | 99.74 %                     |         |
| 6.500  | 4.23                | 0.01 %                      | 0.22 %                      | 0.01 %                       | 99.77 %                     |         |
| 7.000  | 4.24                | 0.00 %                      | 0.22 %                      | 0.00 %                       | 99.78 %                     |         |
| 7.400  | 4.24                | 0.00 %                      | 0.22 %                      | 0.00 %                       | 99.78 %                     |         |
| 8.000  | 4.25                | 0.00 %                      | 0.22 %                      | 0.00 %                       | 99.78 %                     |         |
| 9.000  | 4.25                | 0.00 %                      | 0.22 %                      | 0.00 %                       | 99.78 %                     |         |
| 10.000 | 4.25                | 0.00 %                      | 0.22 %                      | 0.00 %                       | 99.78 %                     |         |
| 11.000 | 4.25                | 0.00 %                      | 0.22 %                      | 0.00 %                       | 99.78 %                     |         |
| 12.000 | 4.25                | 0.00 %                      | 0.22 %                      | 0.00 %                       | 99.78 %                     |         |

## Carbonate and acidity

Carbonate 0.129 mM  
Acidity error -0.360 mM

## Other graphs

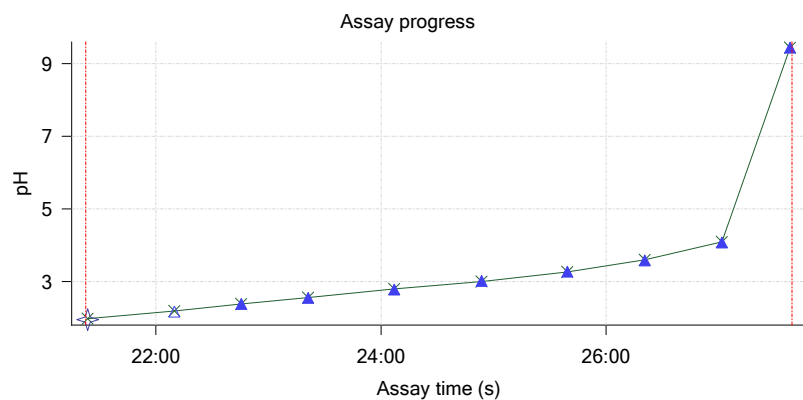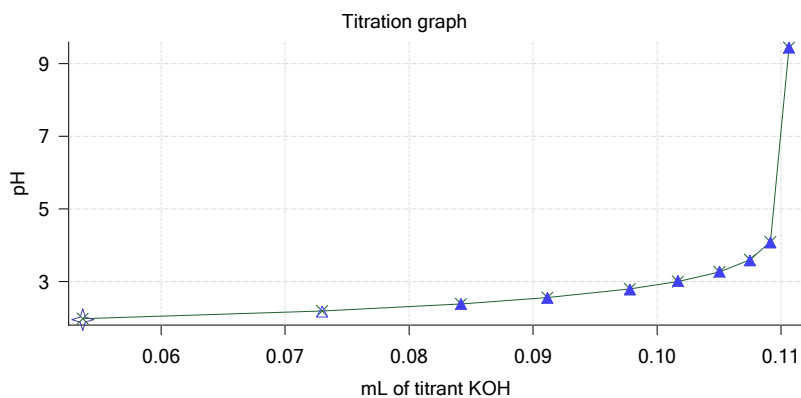



Sample name: **M02\_octanol**  
 Assay name: **pH-metric high logP**  
 Assay ID: **18C-01011**  
 Filename: **C:\Sirius\_T3\Mehtap\20180228\_exp28\_logP\_T3-2\18C-01011\_M02\_octanol\_pH-metric high logP.t3r**

Experiment start time: **3/1/2018 2:44:22 PM**  
 Analyst: **Dorothy Levorse**  
 Instrument ID: **T312060**

## Other graphs (continued)

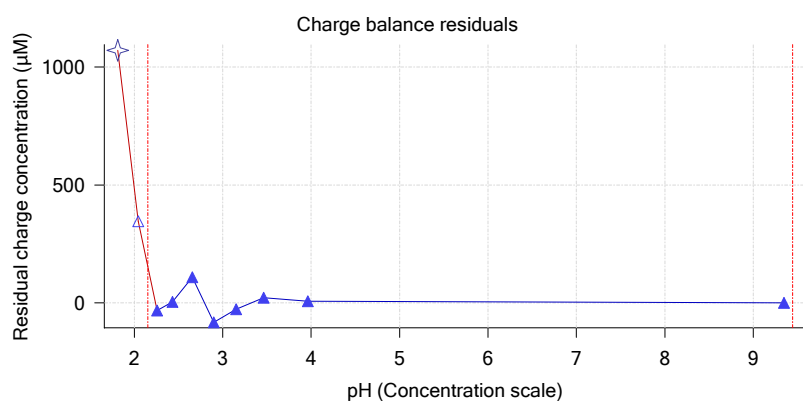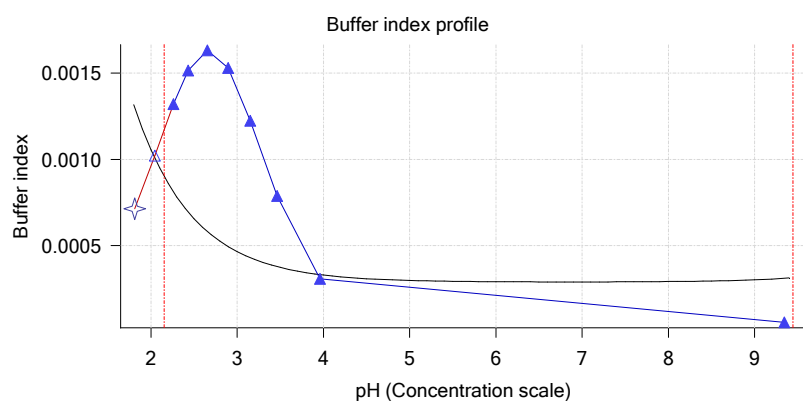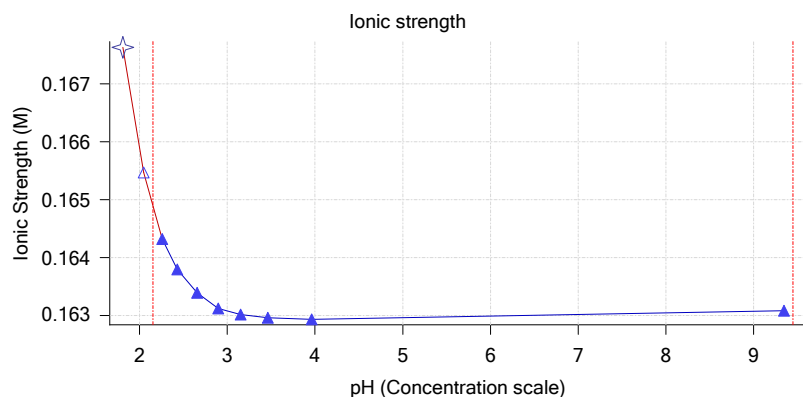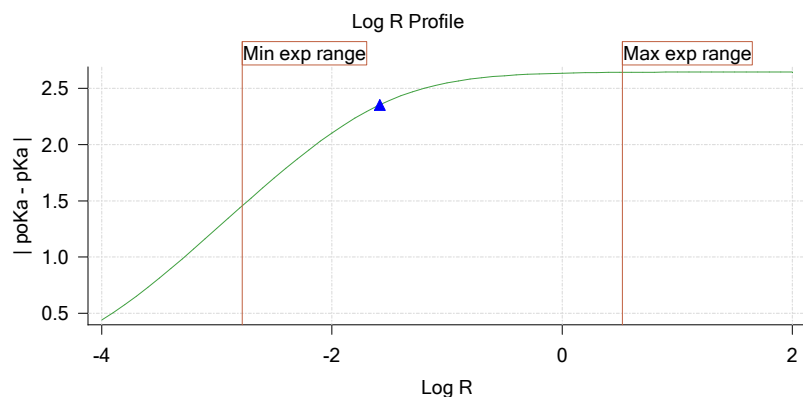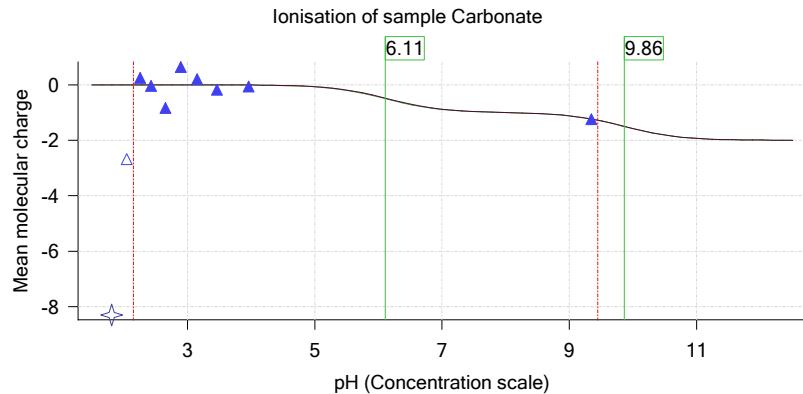

Sample name: **M02\_octanol**  
 Assay name: **pH-metric high logP**  
 Assay ID: **18C-01011**  
 Filename: **C:\Sirius\_T3\Mehtap\20180228\_exp28\_logP\_T3-2\18C-01011\_M02\_octanol\_pH-metric high logP.t3r**

Experiment start time: **3/1/2018 2:44:22 PM**  
 Analyst: **Dorothy Levorse**  
 Instrument ID: **T312060**

pH-metric high logP Titration 3 of 3 18C-01011 Points 27 to 42

## Overall results

RMSD 0.734  
 Average ionic strength 0.169 M  
 Average temperature 25.0°C  
 Partition ratio 0.0789 : 1  
 Analyte concentration range 3250.6 µM to 3352.6 µM  
 Total points considered 13 of 16

## Warnings and errors

Errors None  
 Warnings Sample concentration factor out of range

## Four-Plus parameters

Alpha 0.130 3/1/2018 2:44:22 PM C:\Sirius\_T3\HCl18B27.t3r  
 S 0.9970 3/1/2018 2:44:22 PM C:\Sirius\_T3\HCl18B27.t3r  
 jH 0.8 3/1/2018 2:44:22 PM C:\Sirius\_T3\HCl18B27.t3r  
 jOH -0.4 3/1/2018 2:44:22 PM C:\Sirius\_T3\HCl18B27.t3r

## Titrants

0.50 M HCl 0.993513 3/1/2018 2:44:22 PM C:\Sirius\_T3\HCl18B27.t3r  
 0.50 M KOH 0.999845 3/1/2018 2:44:22 PM C:\Sirius\_T3\KOH18B27.t3r

## Sample

M02\_octanol concentration factor 0.599  
 Base pKa 1 5.03  
 logP (XH +) 1.60  
 logP (neutral X) 4.27

## Sample graphs

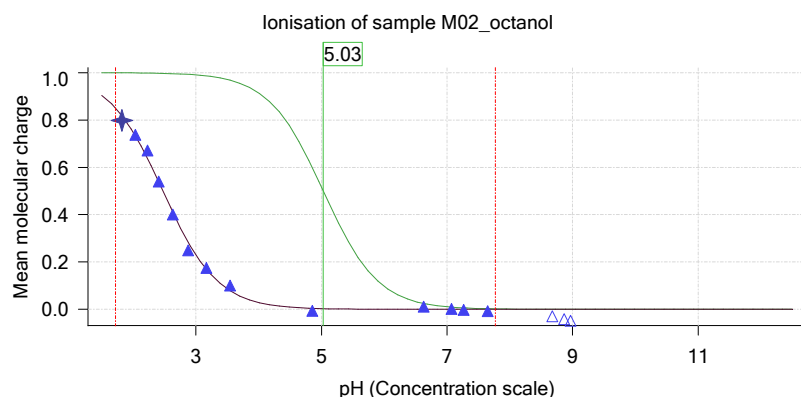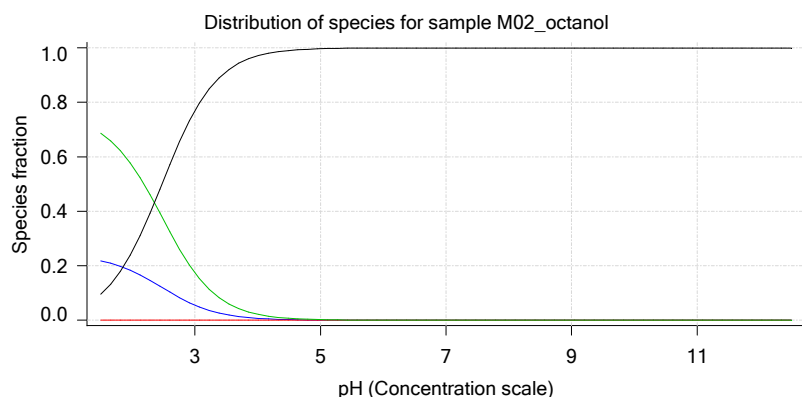

Sample name: **M02\_octanol**  
 Assay name: **pH-metric high logP**  
 Assay ID: **18C-01011**  
 Filename: **C:\Sirius\_T3\Mehtap\20180228\_exp28\_logP\_T3-2\18C-01011\_M02\_octanol\_pH-metric high logP.t3r**

Experiment start time: **3/1/2018 2:44:22 PM**  
 Analyst: **Dorothy Levorse**  
 Instrument ID: **T312060**

## Sample graphs (continued)

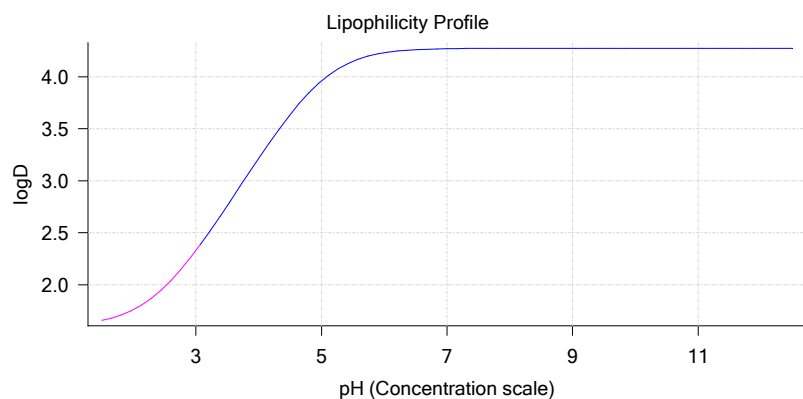

## Sample logD and percent species

| pH     | M02_octanol<br>logD | M02_octanol<br>M02_octanolH | M02_octanol<br>M02_octanolH | M02_octanol<br>M02_octanolH* | M02_octanol<br>M02_octanol* | Comment    |
|--------|---------------------|-----------------------------|-----------------------------|------------------------------|-----------------------------|------------|
| 1.000  | 1.62                | 23.36 %                     | 0.00 %                      | 73.40 %                      | 3.24 %                      | Stomach pH |
| 1.200  | 1.63                | 22.92 %                     | 0.00 %                      | 72.04 %                      | 5.04 %                      |            |
| 2.000  | 1.76                | 18.08 %                     | 0.02 %                      | 56.83 %                      | 25.06 %                     |            |
| 3.000  | 2.33                | 5.55 %                      | 0.05 %                      | 17.45 %                      | 76.95 %                     |            |
| 4.000  | 3.22                | 0.70 %                      | 0.07 %                      | 2.20 %                       | 97.03 %                     |            |
| 5.000  | 3.96                | 0.07 %                      | 0.07 %                      | 0.23 %                       | 99.64 %                     | Blood pH   |
| 6.000  | 4.23                | 0.01 %                      | 0.07 %                      | 0.02 %                       | 99.90 %                     |            |
| 6.500  | 4.26                | 0.00 %                      | 0.07 %                      | 0.01 %                       | 99.92 %                     |            |
| 7.000  | 4.27                | 0.00 %                      | 0.07 %                      | 0.00 %                       | 99.93 %                     |            |
| 7.400  | 4.27                | 0.00 %                      | 0.07 %                      | 0.00 %                       | 99.93 %                     |            |
| 8.000  | 4.27                | 0.00 %                      | 0.07 %                      | 0.00 %                       | 99.93 %                     |            |
| 9.000  | 4.27                | 0.00 %                      | 0.07 %                      | 0.00 %                       | 99.93 %                     |            |
| 10.000 | 4.27                | 0.00 %                      | 0.07 %                      | 0.00 %                       | 99.93 %                     |            |
| 11.000 | 4.27                | 0.00 %                      | 0.07 %                      | 0.00 %                       | 99.93 %                     |            |
| 12.000 | 4.27                | 0.00 %                      | 0.07 %                      | 0.00 %                       | 99.93 %                     |            |

## Carbonate and acidity

 Carbonate 0.051 mM  
 Acidity error -0.266 mM

## Other graphs

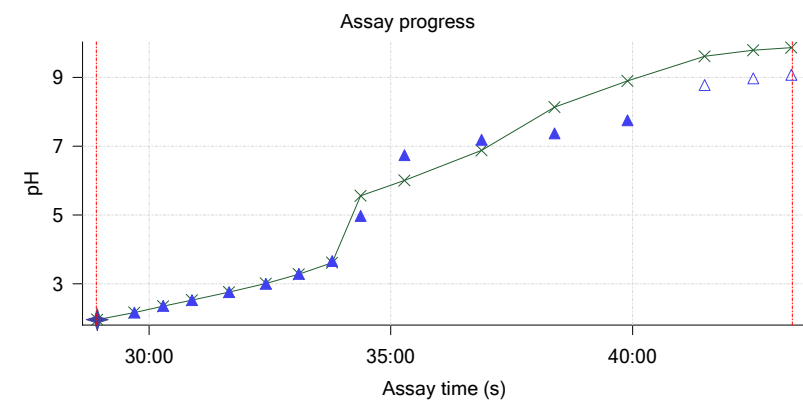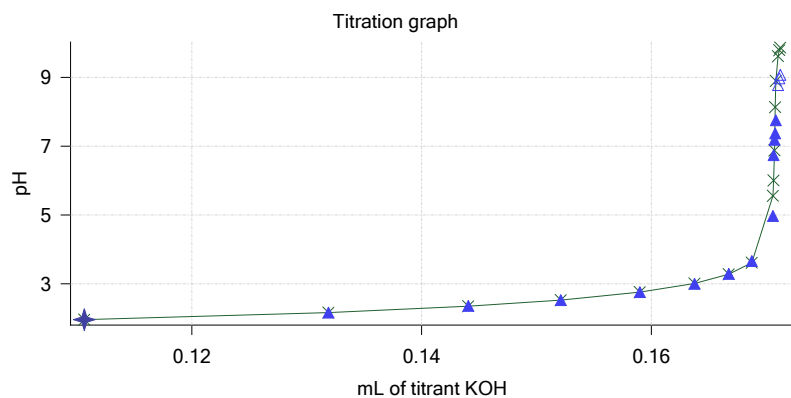

Sample name: **M02\_octanol**  
 Assay name: **pH-metric high logP**  
 Assay ID: **18C-01011**  
 Filename: **C:\Sirius\_T3\Mehtap\20180228\_exp28\_logP\_T3-2\18C-01011\_M02\_octanol\_pH-metric high logP.t3r**

Experiment start time: **3/1/2018 2:44:22 PM**  
 Analyst: **Dorothy Leverse**  
 Instrument ID: **T312060**

## Other graphs (continued)

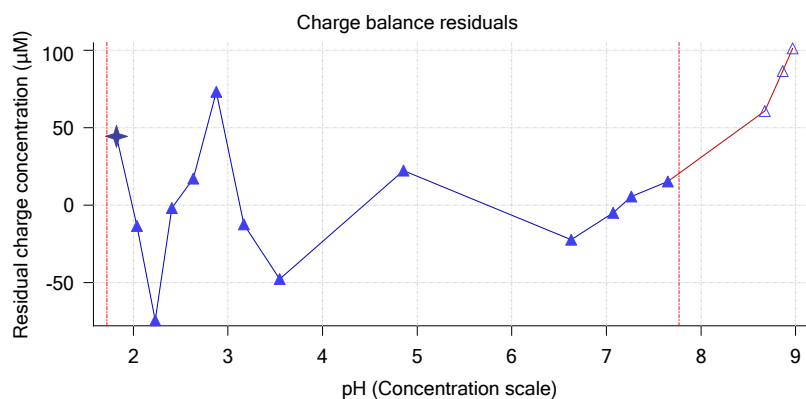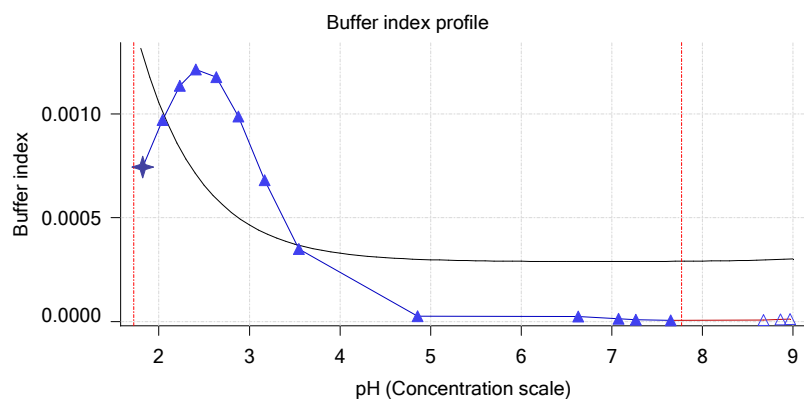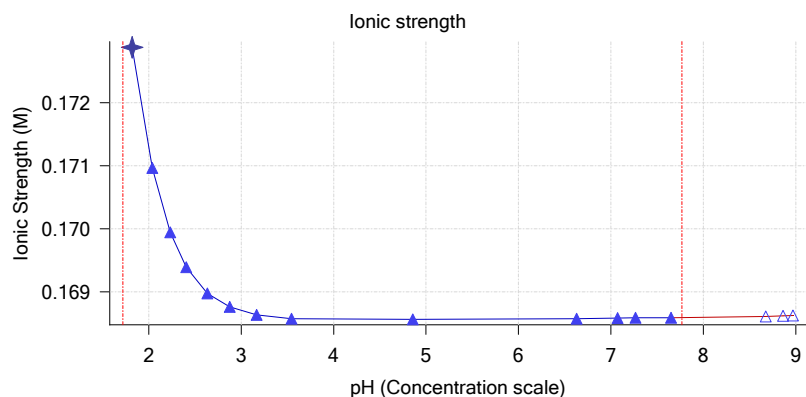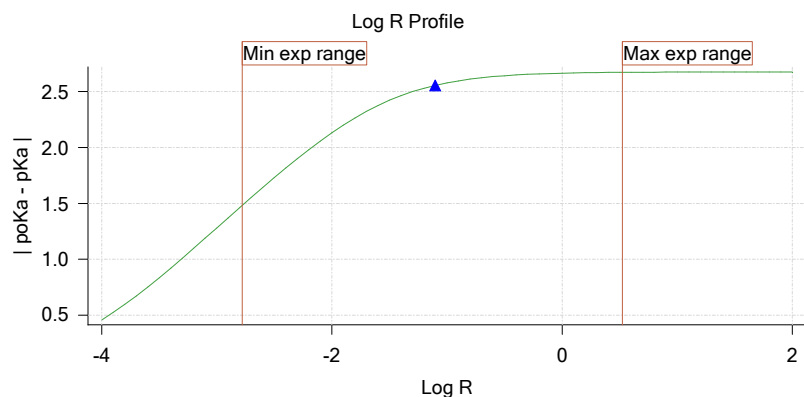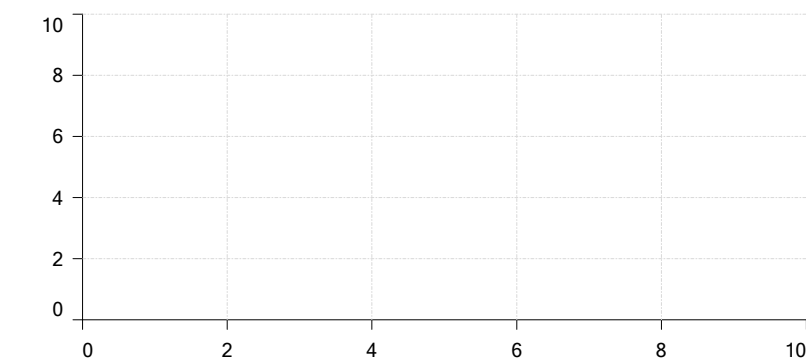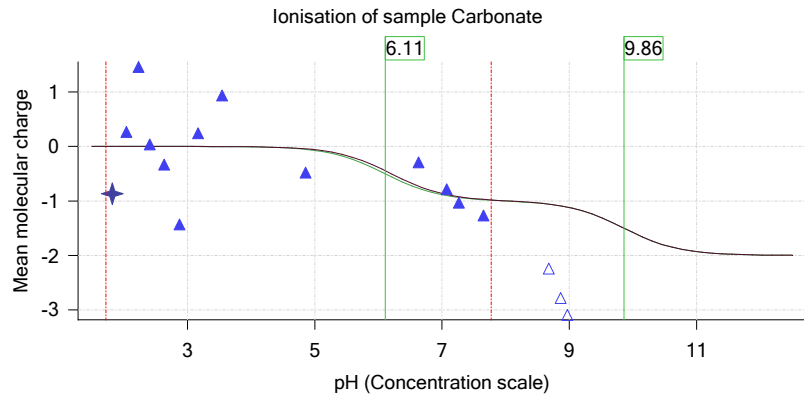

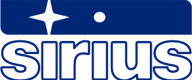

Sample name: **M02\_octanol** Experiment start time: **3/1/2018 2:44:22 PM**  
Assay name: **pH-metric high logP** Analyst: **Dorothy Levorse**  
Assay ID: **18C-01011** Instrument ID: **T312060**  
Filename: **C:\Sirius\_T3\Mehtap\20180228\_exp28\_logP\_T3-2\18C-01011\_M02\_octanol\_pH-metric high logP.t3r**

**Assay Model**

| Settings                          | Value        | Date/Time changed    | Imported from      |
|-----------------------------------|--------------|----------------------|--------------------|
| Sample name                       | M02_octanol  | 12/6/2017 4:20:03 PM | User entered value |
| Sample by                         | Weight       |                      | Default value      |
| Sample weight                     | 0.001870 g   | 2/28/2018 4:51:34 PM | User entered value |
| Formula weight                    | 289.26 g/mol | 12/6/2017 4:20:03 PM | User entered value |
| Solubility                        | Unknown      |                      | Default value      |
| Molecular weight                  | 289.26       | 12/6/2017 4:20:03 PM | User entered value |
| Individual pKa ionic environments | No           |                      | Default value      |
| Number of pKas                    | 1            | 12/6/2017 4:20:03 PM | User entered value |
| Sample is a                       | Base         | 12/6/2017 4:20:03 PM | User entered value |
| pKa 1                             | 5.03         | 12/6/2017 4:20:03 PM | User entered value |
| logp (XH +)                       | 1.60         | 12/6/2017 4:20:17 PM | User entered value |
| logP (neutral X)                  | 3.00         | 2/28/2018 2:50:25 PM | User entered value |

**Events**

| Time    | Event             | Water      | Acid       | Base       | Octanol    | pH    | dpH/dt   | pH R-squared | pH SD   | dpH/dt time         |
|---------|-------------------|------------|------------|------------|------------|-------|----------|--------------|---------|---------------------|
| 3:15.5  | Initial pH = 6.92 |            |            |            |            |       |          |              |         |                     |
| 6:15.3  | Data point 1      | 1.50000 mL | 0.05433 mL | 0.01119 mL | 0.01999 mL | 2.059 | 0.00260  | 0.18062      | 0.00030 | 10.0 s              |
| 7:01.6  | Data point 2      | 1.50000 mL | 0.05433 mL | 0.02484 mL | 0.01999 mL | 2.282 | 0.00555  | 0.77597      | 0.00031 | 10.0 s              |
| 7:37.2  | Data point 3      | 1.50000 mL | 0.05433 mL | 0.03300 mL | 0.01999 mL | 2.484 | 0.01434  | 0.77758      | 0.00080 | 10.0 s              |
| 8:12.8  | Data point 4      | 1.50000 mL | 0.05433 mL | 0.03815 mL | 0.01999 mL | 2.683 | 0.00592  | 0.63815      | 0.00037 | 10.0 s              |
| 8:48.3  | Data point 5      | 1.50000 mL | 0.05433 mL | 0.04153 mL | 0.01999 mL | 2.846 | -0.00121 | 0.24285      | 0.00012 | 10.5 s              |
| 9:29.5  | Data point 6      | 1.50000 mL | 0.05433 mL | 0.04506 mL | 0.01999 mL | 3.087 | -0.00967 | 0.98095      | 0.00048 | 10.0 s              |
| 10:10.2 | Data point 7      | 1.50000 mL | 0.05433 mL | 0.04795 mL | 0.01999 mL | 3.314 | -0.01605 | 0.70172      | 0.00095 | 16.0 s              |
| 10:56.9 | Data point 8      | 1.50000 mL | 0.05433 mL | 0.05035 mL | 0.01999 mL | 3.619 | -0.01833 | 0.92570      | 0.00094 | 11.5 s              |
| 11:39.2 | Data point 9      | 1.50000 mL | 0.05433 mL | 0.05226 mL | 0.01999 mL | 4.146 | -0.01442 | 0.66678      | 0.00087 | 15.5 s              |
| 12:20.1 | Data point 10     | 1.50000 mL | 0.05433 mL | 0.05303 mL | 0.01999 mL | 5.037 | -0.01988 | 0.98479      | 0.00099 | 25.0 s              |
| 13:15.6 | Data point 11     | 1.50000 mL | 0.05433 mL | 0.05318 mL | 0.01999 mL | 6.020 | -0.01461 | 0.67162      | 0.00088 | 27.5 s              |
| 14:13.7 | Data point 12     | 1.50000 mL | 0.05433 mL | 0.05329 mL | 0.01999 mL | 7.623 | -0.08314 | 0.99820      | 0.00411 | Timed out at 59.5 s |
| 15:39.0 | Data point 13     | 1.50000 mL | 0.05433 mL | 0.05332 mL | 0.01999 mL | 7.556 | -0.01960 | 0.99189      | 0.00097 | 58.5 s              |
| 17:08.1 | Data point 14     | 1.50000 mL | 0.05433 mL | 0.05336 mL | 0.01999 mL | 7.824 | -0.04269 | 0.97447      | 0.00214 | Timed out at 59.5 s |
| 18:43.7 | Data point 15     | 1.50000 mL | 0.05433 mL | 0.05343 mL | 0.01999 mL | 8.480 | -0.01896 | 0.89770      | 0.00099 | 53.5 s              |
| 20:12.9 | Data point 16     | 1.50000 mL | 0.05433 mL | 0.05367 mL | 0.01999 mL | 9.557 | -0.01673 | 0.69489      | 0.00099 | 17.0 s              |
| 21:23.5 | Data point 17     | 1.50000 mL | 0.11192 mL | 0.05367 mL | 0.04499 mL | 1.948 | 0.00696  | 0.77037      | 0.00039 | 10.0 s              |
| 22:09.8 | Data point 18     | 1.50000 mL | 0.11192 mL | 0.07298 mL | 0.04499 mL | 2.177 | 0.01234  | 0.90932      | 0.00064 | 10.0 s              |
| 22:45.5 | Data point 19     | 1.50000 mL | 0.11192 mL | 0.08420 mL | 0.04499 mL | 2.387 | -0.00583 | 0.35938      | 0.00048 | 10.0 s              |
| 23:21.1 | Data point 20     | 1.50000 mL | 0.11192 mL | 0.09116 mL | 0.04499 mL | 2.556 | 0.00696  | 0.30662      | 0.00062 | 10.0 s              |
| 24:07.1 | Data point 21     | 1.50000 mL | 0.11192 mL | 0.09781 mL | 0.04499 mL | 2.779 | 0.00229  | 0.34291      | 0.00019 | 10.5 s              |
| 24:53.5 | Data point 22     | 1.50000 mL | 0.11192 mL | 0.10169 mL | 0.04499 mL | 3.019 | -0.00417 | 0.40847      | 0.00032 | 10.0 s              |
| 25:39.4 | Data point 23     | 1.50000 mL | 0.11192 mL | 0.10503 mL | 0.04499 mL | 3.274 | -0.00304 | 0.48058      | 0.00022 | 10.5 s              |
| 26:20.5 | Data point 24     | 1.50000 mL | 0.11192 mL | 0.10750 mL | 0.04499 mL | 3.583 | -0.01595 | 0.64072      | 0.00098 | 10.5 s              |
| 27:01.7 | Data point 25     | 1.50000 mL | 0.11192 mL | 0.10915 mL | 0.04499 mL | 4.080 | -0.00893 | 0.27765      | 0.00084 | 11.0 s              |
| 27:38.1 | Data point 26     | 1.50000 mL | 0.11192 mL | 0.11065 mL | 0.04499 mL | 9.447 | -0.01272 | 0.80417      | 0.00070 | 22.0 s              |
| 28:55.6 | Data point 27     | 1.50000 mL | 0.17265 mL | 0.11065 mL | 0.14499 mL | 1.958 | -0.00711 | 0.87945      | 0.00037 | 10.0 s              |
| 29:41.9 | Data point 28     | 1.50000 mL | 0.17265 mL | 0.13189 mL | 0.14499 mL | 2.170 | 0.00288  | 0.03386      | 0.00077 | 10.0 s              |
| 30:17.6 | Data point 29     | 1.50000 mL | 0.17265 mL | 0.14407 mL | 0.14499 mL | 2.360 | 0.00992  | 0.49242      | 0.00070 | 10.0 s              |
| 30:53.2 | Data point 30     | 1.50000 mL | 0.17265 mL | 0.15212 mL | 0.14499 mL | 2.533 | -0.00071 | 0.03478      | 0.00019 | 10.0 s              |
| 31:39.2 | Data point 31     | 1.50000 mL | 0.17265 mL | 0.15898 mL | 0.14499 mL | 2.759 | -0.00280 | 0.03542      | 0.00073 | 10.0 s              |
| 32:25.2 | Data point 32     | 1.50000 mL | 0.17265 mL | 0.16376 mL | 0.14499 mL | 2.999 | 0.00572  | 0.11987      | 0.00082 | 10.0 s              |
| 33:05.9 | Data point 33     | 1.50000 mL | 0.17265 mL | 0.16672 mL | 0.14499 mL | 3.289 | -0.00045 | 0.04094      | 0.00011 | 10.5 s              |
| 33:47.1 | Data point 34     | 1.50000 mL | 0.17265 mL | 0.16874 mL | 0.14499 mL | 3.666 | -0.00646 | 0.91671      | 0.00033 | 10.0 s              |
| 34:22.5 | Data point 35     | 1.50000 mL | 0.17265 mL | 0.17058 mL | 0.14499 mL | 4.972 | -0.01889 | 0.93768      | 0.00096 | 29.0 s              |
| 35:16.9 | Data point 36     | 1.50000 mL | 0.17265 mL | 0.17063 mL | 0.14499 mL | 6.740 | -0.05158 | 0.98694      | 0.00256 | Timed out at 59.5 s |
| 36:52.5 | Data point 37     | 1.50000 mL | 0.17265 mL | 0.17072 mL | 0.14499 mL | 7.181 | -0.03986 | 0.97488      | 0.00199 | Timed out at 59.5 s |



## Assay Events

Sample name: **M02\_octanol**  
Assay name: **pH-metric high logP**  
Assay ID: **18C-01011**  
Filename: **C:\Sirius\_T3\Mehtap\20180228\_exp28\_logP\_T3-2\18C-01011\_M02\_octanol\_pH-metric high logP.t3r**

Experiment start time: **3/1/2018 2:44:22 PM**  
Analyst: **Dorothy Levorse**  
Instrument ID: **T312060**

**Events (continued)**

| Time    | Event         | Water      | Acid       | Base       | Octanol    | pH    | dpH/dt   | pH R-squared | pH SD   | dpH/dt time         |
|---------|---------------|------------|------------|------------|------------|-------|----------|--------------|---------|---------------------|
| 38:23.1 | Data point 38 | 1.50000 mL | 0.17265 mL | 0.17077 mL | 0.14499 mL | 7.373 | -0.03900 | 0.95207      | 0.00197 | Timed out at 59.5 s |
| 39:53.6 | Data point 39 | 1.50000 mL | 0.17265 mL | 0.17081 mL | 0.14499 mL | 7.756 | -0.05606 | 0.98714      | 0.00279 | Timed out at 59.5 s |
| 41:29.3 | Data point 40 | 1.50000 mL | 0.17265 mL | 0.17103 mL | 0.14499 mL | 8.778 | -0.01761 | 0.76339      | 0.00100 | 24.5 s              |
| 42:29.5 | Data point 41 | 1.50000 mL | 0.17265 mL | 0.17114 mL | 0.14499 mL | 8.966 | -0.01729 | 0.75749      | 0.00098 | 17.0 s              |
| 43:17.1 | Data point 42 | 1.50000 mL | 0.17265 mL | 0.17121 mL | 0.14499 mL | 9.071 | -0.01579 | 0.68970      | 0.00094 | 23.0 s              |
| 43:49.1 | Assay volumes | 1.50000 mL | 0.17265 mL | 0.17121 mL | 0.14499 mL |       |          |              |         |                     |

Sample name: **M02\_octanol**  
 Assay name: **pH-metric high logP**  
 Assay ID: **18C-01011**  
 Filename: **C:\Sirius\_T3\Mehtap\20180228\_exp28\_logP\_T3-2\18C-01011\_M02\_octanol\_pH-metric high logP.t3r**

Experiment start time: **3/1/2018 2:44:22 PM**  
 Analyst: **Dorothy Levorse**  
 Instrument ID: **T312060**

## Assay Settings

| Setting                             | Value              | Original Value | Date/Time changed | Imported from |
|-------------------------------------|--------------------|----------------|-------------------|---------------|
| <b>General Settings</b>             |                    |                |                   |               |
| Analyst name                        | Dorothy Levorse    |                |                   |               |
| <b>Standard Experiment Settings</b> |                    |                |                   |               |
| Number of titrations                | 3                  |                |                   |               |
| Minimum pH                          | 2.000              |                |                   |               |
| Maximum pH                          | 9.000              |                |                   |               |
| pH step between points of           | 0.200              |                |                   |               |
| Minimum titrant addition            | 0.00002 mL         |                |                   |               |
| Maximum titrant addition            | 0.10000 mL         |                |                   |               |
| Argon flow rate                     | 100%               |                |                   |               |
| Start titration using               | Cautious pH adjust |                |                   |               |
| <b>Advanced General Settings</b>    |                    |                |                   |               |
| Detect turbidity using              | None               |                |                   |               |
| Collect turbidity sensor data       | No                 |                |                   |               |
| Collect UV spectra                  | No                 |                |                   |               |
| Stir after titrant addition for     | 5 seconds          |                |                   |               |
| For titrant addition, stir at       | 10%                |                |                   |               |
| <b>Titration Pre-Dose</b>           |                    |                |                   |               |
| Titration pre-dose                  | None               |                |                   |               |
| <b>Assay Medium</b>                 |                    |                |                   |               |
| ISA water volume                    | 1.50 mL            |                |                   |               |
| Water added                         | Automatic          |                |                   |               |
| After water addition, stir for      | 5 seconds          |                |                   |               |
| At a speed of                       | 10%                |                |                   |               |
| Partition solvent type              | Octanol            |                |                   |               |
| Partition volume                    | 0.020 mL           |                |                   |               |
| Partition solvent added             | Automatic          |                |                   |               |
| After partition addition, stir for  | 1 seconds          |                |                   |               |
| <b>Sample Sonication</b>            |                    |                |                   |               |
| Sonicate                            | No                 |                |                   |               |
| <b>Sample Dissolution</b>           |                    |                |                   |               |
| Perform a dissolution stage         | Yes                |                |                   |               |
| Adjust and hold pH for dissolution  | To start pH        |                |                   |               |
| Stir to dissolve for                | 120 seconds        |                |                   |               |
| For dissolution, stir at            | 10%                |                |                   |               |
| <b>Carbonate purge</b>              |                    |                |                   |               |
| Perform a carbonate purge           | No                 |                |                   |               |
| <b>Temperature Control</b>          |                    |                |                   |               |
| Wait for temperature                | Yes                |                |                   |               |
| Required start temperature          | 25.0°C             |                |                   |               |
| Acceptable deviation                | 0.5°C              |                |                   |               |
| Time to wait                        | 60 seconds         |                |                   |               |
| Stir speed of                       | 50%                |                |                   |               |
| <b>Titration 1</b>                  |                    |                |                   |               |
| Titrate from                        | Low to high pH     |                |                   |               |
| Adjust to start pH                  | Yes                |                |                   |               |
| After pH adjust stir for            | 30 seconds         |                |                   |               |
| Stir to allow partitioning for      | 15 seconds         |                |                   |               |
| Stirrer speed for partitioning      | 50%                |                |                   |               |
| <b>Titration 2</b>                  |                    |                |                   |               |
| Titrate from                        | Low to high pH     |                |                   |               |
| Add additional water                | 0.00 mL            |                |                   |               |
| Additional partition solvent volume | 0.025 mL           |                |                   |               |
| Additional partition solvent added  | Automatic          |                |                   |               |
| After pH adjust stir for            | 30 seconds         |                |                   |               |
| Stir to allow partitioning for      | 15 seconds         |                |                   |               |
| Stirrer speed for partitioning      | 55%                |                |                   |               |
| <b>Titration 3</b>                  |                    |                |                   |               |

Sample name: **M02\_octanol**  
 Assay name: **pH-metric high logP**  
 Assay ID: **18C-01011**  
 Filename: **C:\Sirius\_T3\Mehtap\20180228\_exp28\_logP\_T3-2\18C-01011\_M02\_octanol\_pH-metric high logP.t3r**

Experiment start time: **3/1/2018 2:44:22 PM**  
 Analyst: **Dorothy Levorse**  
 Instrument ID: **T312060**

## Assay Settings (continued)

| Setting                             | Value          | Original Value | Date/Time changed | Imported from |
|-------------------------------------|----------------|----------------|-------------------|---------------|
| Titrate from                        | Low to high pH |                |                   |               |
| Add additional water                | 0.00 mL        |                |                   |               |
| Additional partition solvent volume | 0.100 mL       |                |                   |               |
| Additional partition solvent added  | Automatic      |                |                   |               |
| After pH adjust stir for            | 30 seconds     |                |                   |               |
| Stir to allow partitioning for      | 15 seconds     |                |                   |               |
| Stirrer speed for partitioning      | 60%            |                |                   |               |
| <b>Data Point Stability</b>         |                |                |                   |               |
| Stir during data point collection   | No             |                |                   |               |
| Delay before data point collection  | 0 seconds      |                |                   |               |
| Number of points to average         | 20 points      |                |                   |               |
| Time interval between points        | 0.50 seconds   |                |                   |               |
| Required maximum standard deviation | 0.00100 dpH/dt |                |                   |               |
| Stability timeout after             | 60 seconds     |                |                   |               |

## Calibration Settings

| Setting                   | Value  | Date/Time changed   | Imported from             |
|---------------------------|--------|---------------------|---------------------------|
| Four-Plus alpha           | 0.130  | 3/1/2018 2:44:22 PM | C:\Sirius_T3\HCl18B27.t3r |
| Four-Plus S               | 0.9970 | 3/1/2018 2:44:22 PM | C:\Sirius_T3\HCl18B27.t3r |
| Four-Plus jH              | 0.8    | 3/1/2018 2:44:22 PM | C:\Sirius_T3\HCl18B27.t3r |
| Four-Plus jOH             | -0.4   | 3/1/2018 2:44:22 PM | C:\Sirius_T3\HCl18B27.t3r |
| Base concentration factor | 1.000  | 3/1/2018 2:44:22 PM | C:\Sirius_T3\KOH18B27.t3r |
| Acid concentration factor | 0.994  | 3/1/2018 2:44:22 PM | C:\Sirius_T3\HCl18B27.t3r |

## Instrument Settings

| Setting              | Value                      | Batch Id    | Install date           |
|----------------------|----------------------------|-------------|------------------------|
| Instrument owner     | Merck                      |             |                        |
| Instrument ID        | T312060                    |             |                        |
| Instrument type      | T3 Simulator               |             |                        |
| Software version     | 1.1.3.0                    |             |                        |
| Dispenser module     |                            | T3DM1200361 | 3/31/2009 5:24:52 AM   |
| Dispenser 0          | Water                      |             | 3/31/2009 5:25:05 AM   |
| Syringe volume       | 2.5 mL                     |             |                        |
| Firmware version     | 1.2.1(r2)                  |             |                        |
| Titrant              | Water (0.15 M KCl)         | 02-06-2018  | 2/27/2018 10:05:59 AM  |
| Dispenser 2          | Acid                       |             | 3/31/2009 5:25:11 AM   |
| Syringe volume       | 0.5 mL                     |             |                        |
| Firmware version     | 1.2.1(r2)                  |             |                        |
| Titrant              | Acid (0.5 M HCl)           | 02-27-2018  | 2/27/2018 10:27:22 AM  |
| Dispenser 1          | Base                       |             | 3/31/2009 5:25:21 AM   |
| Syringe volume       | 0.5 mL                     |             |                        |
| Firmware version     | 1.2.1(r2)                  |             |                        |
| Titrant              | Base (0.5 M KOH)           | 9/22/2017   | 2/27/2018 10:21:22 AM  |
| Dispenser 5          | Cosolvent                  |             | 3/31/2009 5:26:24 AM   |
| Syringe volume       | 2.5 mL                     |             |                        |
| Firmware version     | 1.2.1(r2)                  |             |                        |
| Distribution valve 5 | Distribution Valve         |             | 3/31/2009 5:28:19 AM   |
| Firmware version     | 1.1.3                      |             |                        |
| Port A               | Methanol (80%, 0.15 M KCl) | 09-26-17    | 2/7/2018 9:42:01 AM    |
| Port B               | Cyclohexane                | 11-01-17    | 2/27/2018 10:37:57 AM  |
| Dispenser 3          | Buffer                     |             | 8/3/2010 5:05:16 AM    |
| Syringe volume       | 0.5 mL                     |             |                        |
| Firmware version     | 1.2.1(r2)                  |             |                        |
| Titrant              | Dodecane                   | 2018/01/31  | 2/28/2018 10:18:04 AM  |
| Dispenser 6          | Octanol                    |             | 10/22/2010 10:52:43 AM |
| Syringe volume       | 0.5 mL                     |             |                        |



Sample name: **M02\_octanol**  
 Assay name: **pH-metric high logP**  
 Assay ID: **18C-01011**  
 Filename: **C:\Sirius\_T3\Mehtap\20180228\_exp28\_logP\_T3-2\18C-01011\_M02\_octanol\_pH-metric high logP.t3r**

Experiment start time: **3/1/2018 2:44:22 PM**  
 Analyst: **Dorothy Levorse**  
 Instrument ID: **T312060**

## Instrument Settings (continued)

| Setting                                   | Value                      | Batch Id    | Install date           |
|-------------------------------------------|----------------------------|-------------|------------------------|
| Firmware version                          | 1.2.1(r2)                  |             |                        |
| Titrant                                   | Octanol                    | 01-31-2018  | 2/27/2018 9:59:35 AM   |
| Titration                                 |                            | T3TM1200161 | 3/31/2009 5:24:17 AM   |
| Horizontal axis firmware version          | 1.17 AI1DI2DO2 Stepper 2   |             |                        |
| Vertical axis firmware version            | 1.17 AI1DI2DO2 Stepper 2   |             |                        |
| Chassis I/O firmware version              | 1.11 AI1DI0DO4 Norgren I/O |             |                        |
| Probe I/O firmware version                | 1.1.1                      |             |                        |
| Electrode                                 | T3 Electrode               | T3E0923     | 1/23/2018 2:01:00 PM   |
| E0 calibration                            | +3.14 mV                   |             | 3/1/2018 2:44:50 PM    |
| Filling solution                          | 3M KCl                     | KCL097      | 2/27/2018 9:49:43 AM   |
| Liquids                                   |                            |             |                        |
| Wash 1                                    | 50% IPA:50% Water          |             | 2/28/2018 10:23:32 AM  |
| Wash 2                                    | 0.5% Triton X-100 in H2O   |             | 2/28/2018 10:23:34 AM  |
| Buffer position 1                         | pH7 Wash                   |             | 2/28/2018 10:24:06 AM  |
| Buffer position 2                         | pH 7                       |             | 2/28/2018 10:24:08 AM  |
| Storage position                          |                            |             | 2/28/2018 10:21:14 AM  |
| Wash water                                | 8.1e+003 mL                | 02-27-2018  | 2/27/2018 9:54:39 AM   |
| Waste                                     | 7.3e+003 mL                |             | 11/28/2017 10:36:29 AM |
| Temperature controller                    |                            |             | 8/5/2010 6:35:13 AM    |
| Turbidity detector                        |                            |             | 3/31/2009 5:24:45 AM   |
| Spectrometer                              |                            | 074811      | 11/23/2010 11:22:28 AM |
| Dip probe                                 |                            | 10196       |                        |
| Wavelength coefficient A0                 | 183.333                    |             |                        |
| Wavelength coefficient A1                 | 2.21568                    |             |                        |
| Wavelength coefficient A2                 | -0.000289308               |             |                        |
| Total lamp lit time                       | 112:08:55                  |             | 11/23/2010 11:22:28 AM |
| Calibrated on                             | 2/27/2018 10:40:38 AM      |             |                        |
| Integration time                          | 40                         |             |                        |
| Scans averaged                            | 10                         |             |                        |
| Autoloader                                |                            | T3AL1200345 | 11/10/2015 9:34:13 AM  |
| Left-right axis firmware version          | 1.17 AI1DI2DO2 Stepper 2   |             |                        |
| Front-back axis firmware version          | 1.17 AI1DI2DO2 Stepper 2   |             |                        |
| Vertical axis firmware version            | 1.17 AI1DI2DO2 Stepper 2   |             |                        |
| Chassis I/O firmware version              | 1.11 AI1DI0DO4 Norgren I/O |             |                        |
| Configuration                             |                            |             |                        |
| Alternate titration position              | Titration position         |             |                        |
| Alternate reference position              | Reference position         |             |                        |
| Maximum standard vial volume              | 3.50 mL                    |             |                        |
| Maximum alternate vial volume             | 25.00 mL                   |             |                        |
| Automatic action idle period              | 5 minute(s)                |             |                        |
| Titration tube volume                     | 1.3 mL                     |             |                        |
| Syringe flush count                       | 3.50                       |             |                        |
| Flowing wash pump volume                  | 20.0 mL                    |             |                        |
| Flowing wash stir duration                | 5 s                        |             |                        |
| Flowing wash stir speed                   | 30%                        |             |                        |
| Solvent wash stir duration                | 5 s                        |             |                        |
| Solvent wash stir speed                   | 30%                        |             |                        |
| Surfactant wash stir duration             | 5 s                        |             |                        |
| Surfactant wash stir speed                | 30%                        |             |                        |
| E0 calibration minimum number of points   | 10                         |             |                        |
| E0 calibration maximum standard deviation | 0.01500                    |             |                        |
| E0 calibration timeout period             | 60 s                       |             |                        |
| E0 calibration stir duration              | 5 s                        |             |                        |
| E0 calibration preparation stir speed     | 30%                        |             |                        |
| E0 calibration buffer wash stir duration  | 5 s                        |             |                        |
| E0 calibration buffer wash stir speed     | 30%                        |             |                        |
| E0 calibration reading stir speed         | 0%                         |             |                        |
| Spectrometer calibration stir duration    | 5 s                        |             |                        |

Sample name: **M02\_octanol** Experiment start time: **3/1/2018 2:44:22 PM**  
 Assay name: **pH-metric high logP** Analyst: **Dorothy Levorse**  
 Assay ID: **18C-01011** Instrument ID: **T312060**  
 Filename: **C:\Sirius\_T3\Mehtap\20180228\_exp28\_logP\_T3-2\18C-01011\_M02\_octanol\_pH-metric high logP.t3r**

## Instrument Settings (continued)

| Setting                                     | Value   | Batch Id | Install date |
|---------------------------------------------|---------|----------|--------------|
| Spectrometer calibration stir speed         | 30%     |          |              |
| Spectrometer calibration wash pump volume   | 20.0 mL |          |              |
| Spectrometer calibration wash stir duration | 5 s     |          |              |
| Spectrometer calibration wash stir speed    | 30%     |          |              |
| Overhead dispense height                    | 10000   |          |              |

## Refinement Settings

| Setting                        | Value    | Default value |
|--------------------------------|----------|---------------|
| Turbidity detection method     | None     | None          |
| Turbidity wavelength to assess | 500.0 nm | 500.0 nm      |
| Turbidity maximum absorbance   | 0.100    | 0.100         |
| Turbidity probe threshold      | 50.00    | 50.00         |

## Experiment Log

[2:37] Air gap created for Water (0.15 M KCl)  
 [2:38] Air gap created for Acid (0.5 M HCl)  
 [2:38] Air gap created for Base (0.5 M KOH)  
 [2:38] Air gap released for Water (0.15 M KCl)  
 [2:43] Titrator arm moved to Titration position  
 [2:43] Argon flow rate set to 100  
 [2:43] Titration 1 of 3  
 [2:43] Adding initial titrants  
 [2:43] Automatically add 1.50000 mL of water  
 [3:09] Dispensed 1.500000 mL of Water (0.15 M KCl)  
 [3:09] Stirrer speed set to 10  
 [3:14] Automatically add 0.02000 mL of Octanol  
 [3:14] Dispensed 0.019991 mL of Octanol  
 [3:15] Initial pH = 6.92  
 [3:15] Iterative adjust 6.92 -> 2.00  
 [3:15] pH 6.92 -> 2.00  
 [3:17] Air gap released for Acid (0.5 M HCl)  
 [3:18] Dispensed 0.054327 mL of Acid (0.5 M HCl)  
 [3:23] Holding pH 2.00  
 [5:23] Stirrer speed set to 0  
 [5:23] Stirrer speed set to 50  
 [5:23] Iterative adjust 1.90 -> 2.00  
 [5:23] pH 1.90 -> 2.00  
 [5:24] Air gap released for Base (0.5 M KOH)  
 [5:25] Dispensed 0.011195 mL of Base (0.5 M KOH)  
 [6:15] Stirrer speed set to 0  
 [6:25] Datapoint id 1 collected  
 [6:25] Stirrer speed set to 50  
 [6:30] pH 2.07 -> 2.27  
 [6:30] Using cautious pH adjust  
 [6:31] Dispensed 0.006867 mL of Base (0.5 M KOH)  
 [6:36] Stepping pH = 2.15  
 [6:36] Dispensed 0.005386 mL of Base (0.5 M KOH)  
 [6:41] Stepping pH = 2.24  
 [6:41] Dispensed 0.001388 mL of Base (0.5 M KOH)  
 [6:46] Stepping pH = 2.27  
 [7:02] Stirrer speed set to 0  
 [7:12] Datapoint id 2 collected  
 [7:12] Charge balance equation is out by 0.6%  
 [7:12] Stirrer speed set to 50  
 [7:17] pH 2.29 -> 2.49  
 [7:17] Using charge balance adjust  
 [7:17] Dispensed 0.008161 mL of Base (0.5 M KOH)

Sample name: **M02\_octanol**  
Assay name: **pH-metric high logP**  
Assay ID: **18C-01011**  
Filename: **C:\Sirius\_T3\Mehtap\20180228\_exp28\_logP\_T3-2\18C-01011\_M02\_octanol\_pH-metric high logP.t3r**

Experiment start time: **3/1/2018 2:44:22 PM**  
Analyst: **Dorothy Levorse**  
Instrument ID: **T312060**

## Experiment Log (continued)

[7:37] Stirrer speed set to 0  
[7:47] Datapoint id 3 collected  
[7:47] Charge balance equation is out by -4.6%  
[7:47] Stirrer speed set to 50  
[7:52] pH 2.50 -> 2.70  
[7:52] Using charge balance adjust  
[7:53] Dispensed 0.005151 mL of Base (0.5 M KOH)  
[8:13] Stirrer speed set to 0  
[8:23] Datapoint id 4 collected  
[8:23] Charge balance equation is out by -7.3%  
[8:23] Stirrer speed set to 50  
[8:28] pH 2.70 -> 2.90  
[8:28] Using charge balance adjust  
[8:28] Dispensed 0.003387 mL of Base (0.5 M KOH)  
[8:48] Stirrer speed set to 0  
[8:59] Datapoint id 5 collected  
[8:59] Charge balance equation is out by -24.9%  
[8:59] Stirrer speed set to 50  
[9:04] pH 2.86 -> 3.06  
[9:04] Using cautious pH adjust  
[9:04] Dispensed 0.001246 mL of Base (0.5 M KOH)  
[9:09] Stepping pH = 2.89  
[9:09] Dispensed 0.002281 mL of Base (0.5 M KOH)  
[9:14] Stepping pH = 3.07  
[9:29] Stirrer speed set to 0  
[9:39] Datapoint id 6 collected  
[9:39] Charge balance equation is out by -41.5%  
[9:39] Stirrer speed set to 50  
[9:45] pH 3.10 -> 3.30  
[9:45] Using cautious pH adjust  
[9:45] Dispensed 0.000870 mL of Base (0.5 M KOH)  
[9:50] Stepping pH = 3.12  
[9:50] Dispensed 0.002023 mL of Base (0.5 M KOH)  
[9:55] Stepping pH = 3.29  
[10:10] Stirrer speed set to 0  
[10:26] Datapoint id 7 collected  
[10:26] Charge balance equation is out by -66.6%  
[10:26] Stirrer speed set to 50  
[10:31] pH 3.33 -> 3.53  
[10:31] Using cautious pH adjust  
[10:31] Dispensed 0.000729 mL of Base (0.5 M KOH)  
[10:36] Stepping pH = 3.36  
[10:37] Dispensed 0.001670 mL of Base (0.5 M KOH)  
[10:42] Stepping pH = 3.58  
[10:57] Stirrer speed set to 0  
[11:08] Datapoint id 8 collected  
[11:08] Charge balance equation is out by -63.8%  
[11:08] Stirrer speed set to 50  
[11:13] pH 3.65 -> 3.85  
[11:13] Using cautious pH adjust  
[11:14] Dispensed 0.000753 mL of Base (0.5 M KOH)  
[11:19] Stepping pH = 3.70  
[11:19] Dispensed 0.001152 mL of Base (0.5 M KOH)  
[11:24] Stepping pH = 4.01  
[11:39] Stirrer speed set to 0  
[11:55] Datapoint id 9 collected  
[11:55] Charge balance equation is out by -26.9%  
[11:55] Stirrer speed set to 50  
[12:00] pH 4.22 -> 4.42

Sample name: **M02\_octanol**  
Assay name: **pH-metric high logP**  
Assay ID: **18C-01011**  
Filename: **C:\Sirius\_T3\Mehtap\20180228\_exp28\_logP\_T3-2\18C-01011\_M02\_octanol\_pH-metric high logP.t3r**

Experiment start time: **3/1/2018 2:44:22 PM**  
Analyst: **Dorothy Levorse**  
Instrument ID: **T312060**

## Experiment Log (continued)

[12:00] Using cautious pH adjust  
[12:00] Dispensed 0.000776 mL of Base (0.5 M KOH)  
[12:05] Stepping pH = 4.49  
[12:20] Stirrer speed set to 0  
[12:45] Datapoint id 10 collected  
[12:45] Charge balance equation is out by 50.0%  
[12:45] Stirrer speed set to 50  
[12:50] pH 5.50 -> 5.70  
[12:50] Using cautious pH adjust  
[12:50] Dispensed 0.000118 mL of Base (0.5 M KOH)  
[12:55] Stepping pH = 5.66  
[12:55] Dispensed 0.000024 mL of Base (0.5 M KOH)  
[13:00] Stepping pH = 5.88  
[13:16] Stirrer speed set to 0  
[13:43] Datapoint id 11 collected  
[13:43] Charge balance equation is out by 40.8%  
[13:43] Stirrer speed set to 50  
[13:48] pH 6.03 -> 6.23  
[13:48] Using cautious pH adjust  
[13:48] Dispensed 0.000047 mL of Base (0.5 M KOH)  
[13:53] Stepping pH = 6.09  
[13:53] Dispensed 0.000071 mL of Base (0.5 M KOH)  
[13:59] Stepping pH = 6.65  
[14:14] Stirrer speed set to 0  
[15:14] Datapoint id 12 collected  
[15:14] Charge balance equation is out by -9.8%  
[15:14] Stirrer speed set to 50  
[15:19] pH 7.55 -> 7.75  
[15:19] Using charge balance adjust  
[15:19] Dispensed 0.000024 mL of Base (0.5 M KOH)  
[15:39] Stirrer speed set to 0  
[16:38] Datapoint id 13 collected  
[16:38] Charge balance equation is out by -97.4%  
[16:38] Stirrer speed set to 50  
[16:43] pH 7.40 -> 7.60  
[16:43] Using cautious pH adjust  
[16:43] Dispensed 0.000024 mL of Base (0.5 M KOH)  
[16:48] Stepping pH = 7.41  
[16:48] Dispensed 0.000024 mL of Base (0.5 M KOH)  
[16:53] Stepping pH = 7.62  
[17:08] Stirrer speed set to 0  
[18:08] Datapoint id 14 collected  
[18:08] Charge balance equation is out by -248.2%  
[18:08] Stirrer speed set to 50  
[18:13] pH 7.67 -> 7.87  
[18:13] Using cautious pH adjust  
[18:13] Dispensed 0.000024 mL of Base (0.5 M KOH)  
[18:18] Stepping pH = 7.62  
[18:18] Dispensed 0.000024 mL of Base (0.5 M KOH)  
[18:23] Stepping pH = 7.86  
[18:23] Dispensed 0.000024 mL of Base (0.5 M KOH)  
[18:29] Stepping pH = 8.40  
[18:44] Stirrer speed set to 0  
[19:37] Datapoint id 15 collected  
[19:37] Charge balance equation is out by -741.2%  
[19:37] Stirrer speed set to 50  
[19:42] pH 8.40 -> 8.60  
[19:42] Using cautious pH adjust  
[19:42] Dispensed 0.000024 mL of Base (0.5 M KOH)

Sample name: **M02\_octanol**  
Assay name: **pH-metric high logP**  
Assay ID: **18C-01011**  
Filename: **C:\Sirius\_T3\Mehtap\20180228\_exp28\_logP\_T3-2\18C-01011\_M02\_octanol\_pH-metric high logP.t3r**

Experiment start time: **3/1/2018 2:44:22 PM**  
Analyst: **Dorothy Levorse**  
Instrument ID: **T312060**

## Experiment Log (continued)

[19:47] Stepping pH = 8.38  
[19:48] Dispensed 0.000024 mL of Base (0.5 M KOH)  
[19:53] Stepping pH = 8.35  
[19:53] Dispensed 0.000188 mL of Base (0.5 M KOH)  
[19:58] Stepping pH = 9.41  
[20:13] Stirrer speed set to 0  
[20:30] Datapoint id 16 collected  
[20:30] Charge balance equation is out by -1,840.2%  
[20:30] Titration 2 of 3  
[20:30] Adding initial titrants  
[20:30] Automatically add 0.02500 mL of Octanol  
[20:31] Dispensed 0.025000 mL of Octanol  
[20:31] Stirrer speed set to 10  
[20:32] Stirrer speed set to 55  
[20:32] Iterative adjust 9.57 -> 2.00  
[20:32] pH 9.57 -> 2.00  
[20:33] Dispensed 0.057596 mL of Acid (0.5 M HCl)  
[21:23] Stirrer speed set to 0  
[21:33] Datapoint id 17 collected  
[21:33] Stirrer speed set to 55  
[21:39] pH 1.96 -> 2.16  
[21:39] Using cautious pH adjust  
[21:39] Dispensed 0.009454 mL of Base (0.5 M KOH)  
[21:44] Stepping pH = 2.04  
[21:44] Dispensed 0.007502 mL of Base (0.5 M KOH)  
[21:49] Stepping pH = 2.12  
[21:50] Dispensed 0.002352 mL of Base (0.5 M KOH)  
[21:55] Stepping pH = 2.16  
[22:10] Stirrer speed set to 0  
[22:20] Datapoint id 18 collected  
[22:20] Charge balance equation is out by -2.0%  
[22:20] Stirrer speed set to 55  
[22:25] pH 2.19 -> 2.39  
[22:25] Using charge balance adjust  
[22:25] Dispensed 0.011218 mL of Base (0.5 M KOH)  
[22:45] Stirrer speed set to 0  
[22:55] Datapoint id 19 collected  
[22:55] Charge balance equation is out by 1.0%  
[22:55] Stirrer speed set to 55  
[23:01] pH 2.40 -> 2.60  
[23:01] Using charge balance adjust  
[23:01] Dispensed 0.006961 mL of Base (0.5 M KOH)  
[23:21] Stirrer speed set to 0  
[23:31] Datapoint id 20 collected  
[23:31] Charge balance equation is out by -20.4%  
[23:31] Stirrer speed set to 55  
[23:36] pH 2.57 -> 2.77  
[23:36] Using cautious pH adjust  
[23:36] Dispensed 0.002422 mL of Base (0.5 M KOH)  
[23:41] Stepping pH = 2.62  
[23:42] Dispensed 0.003316 mL of Base (0.5 M KOH)  
[23:47] Stepping pH = 2.73  
[23:47] Dispensed 0.000917 mL of Base (0.5 M KOH)  
[23:52] Stepping pH = 2.76  
[24:07] Stirrer speed set to 0  
[24:18] Datapoint id 21 collected  
[24:18] Charge balance equation is out by -37.8%  
[24:18] Stirrer speed set to 55  
[24:23] pH 2.79 -> 2.99

Sample name: **M02\_octanol**  
Assay name: **pH-metric high logP**  
Assay ID: **18C-01011**  
Filename: **C:\Sirius\_T3\Mehtap\20180228\_exp28\_logP\_T3-2\18C-01011\_M02\_octanol\_pH-metric high logP.t3r**

Experiment start time: **3/1/2018 2:44:22 PM**  
Analyst: **Dorothy Levorse**  
Instrument ID: **T312060**

## Experiment Log (continued)

[24:23] Using cautious pH adjust  
[24:23] Dispensed 0.001552 mL of Base (0.5 M KOH)  
[24:28] Stepping pH = 2.84  
[24:28] Dispensed 0.002187 mL of Base (0.5 M KOH)  
[24:33] Stepping pH = 2.98  
[24:33] Dispensed 0.000141 mL of Base (0.5 M KOH)  
[24:38] Stepping pH = 3.00  
[24:53] Stirrer speed set to 0  
[25:03] Datapoint id 22 collected  
[25:03] Charge balance equation is out by -25.1%  
[25:03] Stirrer speed set to 55  
[25:09] pH 3.03 -> 3.23  
[25:09] Using cautious pH adjust  
[25:09] Dispensed 0.001082 mL of Base (0.5 M KOH)  
[25:14] Stepping pH = 3.07  
[25:14] Dispensed 0.001952 mL of Base (0.5 M KOH)  
[25:19] Stepping pH = 3.20  
[25:19] Dispensed 0.000306 mL of Base (0.5 M KOH)  
[25:24] Stepping pH = 3.25  
[25:39] Stirrer speed set to 0  
[25:50] Datapoint id 23 collected  
[25:50] Charge balance equation is out by -53.6%  
[25:50] Stirrer speed set to 55  
[25:55] pH 3.29 -> 3.49  
[25:55] Using cautious pH adjust  
[25:55] Dispensed 0.000894 mL of Base (0.5 M KOH)  
[26:00] Stepping pH = 3.33  
[26:00] Dispensed 0.001576 mL of Base (0.5 M KOH)  
[26:05] Stepping pH = 3.51  
[26:20] Stirrer speed set to 0  
[26:31] Datapoint id 24 collected  
[26:31] Charge balance equation is out by -39.1%  
[26:31] Stirrer speed set to 55  
[26:36] pH 3.61 -> 3.81  
[26:36] Using cautious pH adjust  
[26:36] Dispensed 0.000847 mL of Base (0.5 M KOH)  
[26:41] Stepping pH = 3.69  
[26:41] Dispensed 0.000800 mL of Base (0.5 M KOH)  
[26:46] Stepping pH = 3.90  
[27:02] Stirrer speed set to 0  
[27:13] Datapoint id 25 collected  
[27:13] Charge balance equation is out by 2.9%  
[27:13] Stirrer speed set to 55  
[27:18] pH 4.16 -> 4.36  
[27:18] Using charge balance adjust  
[27:18] Dispensed 0.001505 mL of Base (0.5 M KOH)  
[27:38] Stirrer speed set to 0  
[28:00] Datapoint id 26 collected  
[28:00] Charge balance equation is out by 2,543.0%  
[28:00] Titration 3 of 3  
[28:00] Adding initial titrants  
[28:00] Automatically add 0.10000 mL of Octanol  
[28:03] Dispensed 0.100000 mL of Octanol  
[28:03] Stirrer speed set to 10  
[28:04] Stirrer speed set to 60  
[28:04] Iterative adjust 9.54 -> 2.00  
[28:04] pH 9.54 -> 2.00  
[28:05] Dispensed 0.060724 mL of Acid (0.5 M HCl)  
[28:55] Stirrer speed set to 0



Sample name: **M02\_octanol**  
 Assay name: **pH-metric high logP**  
 Assay ID: **18C-01011**  
 Filename: **C:\Sirius\_T3\Mehtap\20180228\_exp28\_logP\_T3-2\18C-01011\_M02\_octanol\_pH-metric high logP.t3r**

Experiment start time: **3/1/2018 2:44:22 PM**  
 Analyst: **Dorothy Levorse**  
 Instrument ID: **T312060**

## Experiment Log (continued)

[29:06] Datapoint id 27 collected  
 [29:06] Stirrer speed set to 60  
 [29:11] pH 1.96 -> 2.16  
 [29:11] Using cautious pH adjust  
 [29:11] Dispensed 0.010042 mL of Base (0.5 M KOH)  
 [29:16] Stepping pH = 2.04  
 [29:16] Dispensed 0.008937 mL of Base (0.5 M KOH)  
 [29:22] Stepping pH = 2.13  
 [29:22] Dispensed 0.002258 mL of Base (0.5 M KOH)  
 [29:27] Stepping pH = 2.16  
 [29:42] Stirrer speed set to 0  
 [29:52] Datapoint id 28 collected  
 [29:52] Charge balance equation is out by -5.7%  
 [29:52] Stirrer speed set to 60  
 [29:57] pH 2.18 -> 2.38  
 [29:57] Using charge balance adjust  
 [29:57] Dispensed 0.012183 mL of Base (0.5 M KOH)  
 [30:18] Stirrer speed set to 0  
 [30:28] Datapoint id 29 collected  
 [30:28] Charge balance equation is out by -10.3%  
 [30:28] Stirrer speed set to 60  
 [30:33] pH 2.37 -> 2.57  
 [30:33] Using charge balance adjust  
 [30:33] Dispensed 0.008043 mL of Base (0.5 M KOH)  
 [30:53] Stirrer speed set to 0  
 [31:03] Datapoint id 30 collected  
 [31:03] Charge balance equation is out by -16.1%  
 [31:03] Stirrer speed set to 60  
 [31:08] pH 2.54 -> 2.74  
 [31:08] Using cautious pH adjust  
 [31:08] Dispensed 0.002775 mL of Base (0.5 M KOH)  
 [31:14] Stepping pH = 2.59  
 [31:14] Dispensed 0.003716 mL of Base (0.5 M KOH)  
 [31:19] Stepping pH = 2.72  
 [31:19] Dispensed 0.000376 mL of Base (0.5 M KOH)  
 [31:24] Stepping pH = 2.75  
 [31:39] Stirrer speed set to 0  
 [31:49] Datapoint id 31 collected  
 [31:49] Charge balance equation is out by -24.3%  
 [31:49] Stirrer speed set to 60  
 [31:54] pH 2.77 -> 2.97  
 [31:54] Using cautious pH adjust  
 [31:54] Dispensed 0.001787 mL of Base (0.5 M KOH)  
 [31:59] Stepping pH = 2.82  
 [32:00] Dispensed 0.002563 mL of Base (0.5 M KOH)  
 [32:05] Stepping pH = 2.94  
 [32:05] Dispensed 0.000423 mL of Base (0.5 M KOH)  
 [32:10] Stepping pH = 2.98  
 [32:25] Stirrer speed set to 0  
 [32:35] Datapoint id 32 collected  
 [32:35] Charge balance equation is out by -33.2%  
 [32:35] Stirrer speed set to 60  
 [32:40] pH 3.01 -> 3.21  
 [32:40] Using cautious pH adjust  
 [32:40] Dispensed 0.001246 mL of Base (0.5 M KOH)  
 [32:45] Stepping pH = 3.06  
 [32:46] Dispensed 0.001717 mL of Base (0.5 M KOH)  
 [32:51] Stepping pH = 3.23  
 [33:06] Stirrer speed set to 0

Sample name: **M02\_octanol**  
Assay name: **pH-metric high logP**  
Assay ID: **18C-01011**  
Filename: **C:\Sirius\_T3\Mehtap\20180228\_exp28\_logP\_T3-2\18C-01011\_M02\_octanol\_pH-metric high logP.t3r**

Experiment start time: **3/1/2018 2:44:22 PM**  
Analyst: **Dorothy Levorse**  
Instrument ID: **T312060**

## Experiment Log (continued)

[33:16] Datapoint id 33 collected  
[33:16] Charge balance equation is out by -18.3%  
[33:16] Stirrer speed set to 60  
[33:21] pH 3.31 -> 3.51  
[33:21] Using cautious pH adjust  
[33:22] Dispensed 0.001011 mL of Base (0.5 M KOH)  
[33:27] Stepping pH = 3.38  
[33:27] Dispensed 0.001011 mL of Base (0.5 M KOH)  
[33:32] Stepping pH = 3.56  
[33:47] Stirrer speed set to 0  
[33:57] Datapoint id 34 collected  
[33:57] Charge balance equation is out by 0.3%  
[33:57] Stirrer speed set to 60  
[34:02] pH 3.70 -> 3.90  
[34:02] Using charge balance adjust  
[34:02] Dispensed 0.001834 mL of Base (0.5 M KOH)  
[34:22] Stirrer speed set to 0  
[34:52] Datapoint id 35 collected  
[34:52] Charge balance equation is out by 535.4%  
[34:52] Stirrer speed set to 60  
[34:57] pH 6.04 -> 6.24  
[34:57] Using cautious pH adjust  
[34:57] Dispensed 0.000047 mL of Base (0.5 M KOH)  
[35:02] Stepping pH = 6.25  
[35:17] Stirrer speed set to 0  
[36:17] Datapoint id 36 collected  
[36:17] Charge balance equation is out by 50.0%  
[36:17] Stirrer speed set to 60  
[36:22] pH 6.68 -> 6.88  
[36:22] Using cautious pH adjust  
[36:22] Dispensed 0.000024 mL of Base (0.5 M KOH)  
[36:27] Stepping pH = 6.69  
[36:27] Dispensed 0.000047 mL of Base (0.5 M KOH)  
[36:32] Stepping pH = 6.81  
[36:32] Dispensed 0.000024 mL of Base (0.5 M KOH)  
[36:37] Stepping pH = 6.99  
[36:52] Stirrer speed set to 0  
[37:52] Datapoint id 37 collected  
[37:52] Charge balance equation is out by -157.1%  
[37:52] Stirrer speed set to 60  
[37:58] pH 7.09 -> 7.29  
[37:58] Using cautious pH adjust  
[37:58] Dispensed 0.000024 mL of Base (0.5 M KOH)  
[38:03] Stepping pH = 7.18  
[38:03] Dispensed 0.000024 mL of Base (0.5 M KOH)  
[38:08] Stepping pH = 7.33  
[38:23] Stirrer speed set to 0  
[39:23] Datapoint id 38 collected  
[39:23] Charge balance equation is out by -88.9%  
[39:23] Stirrer speed set to 60  
[39:28] pH 7.33 -> 7.53  
[39:28] Using cautious pH adjust  
[39:28] Dispensed 0.000024 mL of Base (0.5 M KOH)  
[39:33] Stepping pH = 7.45  
[39:33] Dispensed 0.000024 mL of Base (0.5 M KOH)  
[39:38] Stepping pH = 7.64  
[39:54] Stirrer speed set to 0  
[40:54] Datapoint id 39 collected  
[40:54] Charge balance equation is out by -184.4%



Sample name: **M02\_octanol**  
Assay name: **pH-metric high logP**  
Assay ID: **18C-01011**  
Filename: **C:\Sirius\_T3\Mehtap\20180228\_exp28\_logP\_T3-2\18C-01011\_M02\_octanol\_pH-metric high logP.t3r**

Experiment start time: **3/1/2018 2:44:22 PM**  
Analyst: **Dorothy Levorse**  
Instrument ID: **T312060**

## Experiment Log (continued)

[40:54] Stirrer speed set to 60  
[40:59] pH 7.66 -> 7.86  
[40:59] Using cautious pH adjust  
[40:59] Dispensed 0.000024 mL of Base (0.5 M KOH)  
[41:04] Stepping pH = 7.62  
[41:04] Dispensed 0.000024 mL of Base (0.5 M KOH)  
[41:09] Stepping pH = 7.58  
[41:09] Dispensed 0.000165 mL of Base (0.5 M KOH)  
[41:14] Stepping pH = 8.20  
[41:29] Stirrer speed set to 0  
[41:54] Datapoint id 40 collected  
[41:54] Charge balance equation is out by -2,249.9%  
[41:54] Stirrer speed set to 60  
[41:59] pH 8.79 -> 8.99  
[41:59] Using cautious pH adjust  
[41:59] Dispensed 0.000024 mL of Base (0.5 M KOH)  
[42:04] Stepping pH = 8.81  
[42:04] Dispensed 0.000047 mL of Base (0.5 M KOH)  
[42:09] Stepping pH = 8.88  
[42:09] Dispensed 0.000047 mL of Base (0.5 M KOH)  
[42:14] Stepping pH = 9.00  
[42:29] Stirrer speed set to 0  
[42:47] Datapoint id 41 collected  
[42:47] Charge balance equation is out by -246.2%  
[42:47] Stirrer speed set to 60  
[42:52] pH 8.96 -> 9.05  
[42:52] Using cautious pH adjust  
[42:52] Dispensed 0.000024 mL of Base (0.5 M KOH)  
[42:57] Stepping pH = 8.95  
[42:57] Dispensed 0.000047 mL of Base (0.5 M KOH)  
[43:02] Stepping pH = 9.06  
[43:17] Stirrer speed set to 0  
[43:40] Datapoint id 42 collected  
[43:40] Charge balance equation is out by -272.1%  
[43:40] Argon flow rate set to 0  
[43:44] Titrator arm moved over Titration position
