# Supplementary material for: Octanol-water partition coefficient measurements for the SAMPL6 Blind Prediction Challenge
Source: bioRxiv or medRxiv preprint supplement (doi:10.1101/757393), 2019-12-02
Supplement: Supplementary file [file media-2.zip]

Sample name: **M18\_octanol**  
 Assay name: **pH-metric high logP**  
 Assay ID: **18C-09014**  
 Filename: **C:\Sirius\_T3\Mehtap\20180309\_exp31\_logP\_T3-2\18C-09014\_M18\_octanol\_pH-metric high logP.t3r**

Experiment start time: **3/9/2018 8:37:21 PM**  
 Analyst: **Pion**  
 Instrument ID: **T312060**

## pH-metric Result

logP (XH2 +) -0.24 ±0.09 (n=50)  
 logP (neutral XH) 2.63 ±0.01 (n=50)  
 logP (X -) 0.46  
 RMSD 0.266

## 18C-09014 Points 2 to 24

M18\_octanol concentration factor 0.988  
 Carbonate 0.1577 mM  
 Acidity error -0.03698 mM

## 18C-09014 Points 25 to 48

M18\_octanol concentration factor 0.944  
 Carbonate 0.1161 mM  
 Acidity error -0.54687 mM

## 18C-09014 Points 49 to 73

M18\_octanol concentration factor 0.993  
 Carbonate 0.1503 mM  
 Acidity error -1.10219 mM

## Warnings and errors

Errors None  
 Warnings None

## Sample logD and percent species

| pH     | M18_octanol<br>logD | M18_octanol<br>M18_octanolH2 | M18_octanol<br>M18_octanolH | M18_octanol<br>M18_octanol | M18_octanol<br>M18_octanolH2* | M18_octanol<br>M18_octanolH* | M18_octanol<br>M18_octanol* | Comment       |
|--------|---------------------|------------------------------|-----------------------------|----------------------------|-------------------------------|------------------------------|-----------------------------|---------------|
| 1.000  | -0.23               | 63.00 %                      | 0.00 %                      | 0.00 %                     | 35.85 %                       | 1.14 %                       | 0.00 %                      | Stomach<br>pH |
| 1.200  | -0.22               | 62.58 %                      | 0.00 %                      | 0.00 %                     | 35.61 %                       | 1.80 %                       | 0.00 %                      |               |
| 2.000  | -0.12               | 57.11 %                      | 0.02 %                      | 0.00 %                     | 32.50 %                       | 10.37 %                      | 0.00 %                      |               |
| 3.000  | 0.38                | 29.51 %                      | 0.13 %                      | 0.00 %                     | 16.79 %                       | 53.57 %                      | 0.00 %                      | Blood pH      |
| 4.000  | 1.25                | 5.06 %                       | 0.22 %                      | 0.00 %                     | 2.88 %                        | 91.85 %                      | 0.00 %                      |               |
| 5.000  | 2.11                | 0.54 %                       | 0.23 %                      | 0.00 %                     | 0.31 %                        | 98.91 %                      | 0.00 %                      |               |
| 6.000  | 2.54                | 0.05 %                       | 0.23 %                      | 0.00 %                     | 0.03 %                        | 99.68 %                      | 0.00 %                      |               |
| 6.500  | 2.60                | 0.02 %                       | 0.23 %                      | 0.00 %                     | 0.01 %                        | 99.74 %                      | 0.00 %                      |               |
| 7.000  | 2.62                | 0.01 %                       | 0.23 %                      | 0.00 %                     | 0.00 %                        | 99.76 %                      | 0.00 %                      |               |
| 7.400  | 2.62                | 0.00 %                       | 0.23 %                      | 0.00 %                     | 0.00 %                        | 99.76 %                      | 0.00 %                      |               |
| 8.000  | 2.63                | 0.00 %                       | 0.23 %                      | 0.00 %                     | 0.00 %                        | 99.76 %                      | 0.00 %                      |               |
| 9.000  | 2.62                | 0.00 %                       | 0.23 %                      | 0.01 %                     | 0.00 %                        | 99.75 %                      | 0.02 %                      |               |
| 10.000 | 2.54                | 0.00 %                       | 0.23 %                      | 0.05 %                     | 0.00 %                        | 99.56 %                      | 0.15 %                      |               |
| 11.000 | 2.13                | 0.00 %                       | 0.23 %                      | 0.51 %                     | 0.00 %                        | 97.77 %                      | 1.48 %                      |               |
| 12.000 | 1.32                | 0.00 %                       | 0.19 %                      | 4.36 %                     | 0.00 %                        | 82.87 %                      | 12.57 %                     |               |

Sample name: **M18\_octanol**  
 Assay name: **pH-metric high logP**  
 Assay ID: **18C-09014**  
 Filename: **C:\Sirius\_T3\Mehtap\20180309\_exp31\_logP\_T3-2\18C-09014\_M18\_octanol\_pH-metric high logP.t3r**

Experiment start time: **3/9/2018 8:37:21 PM**  
 Analyst: **Pion**  
 Instrument ID: **T312060**

## Graphs

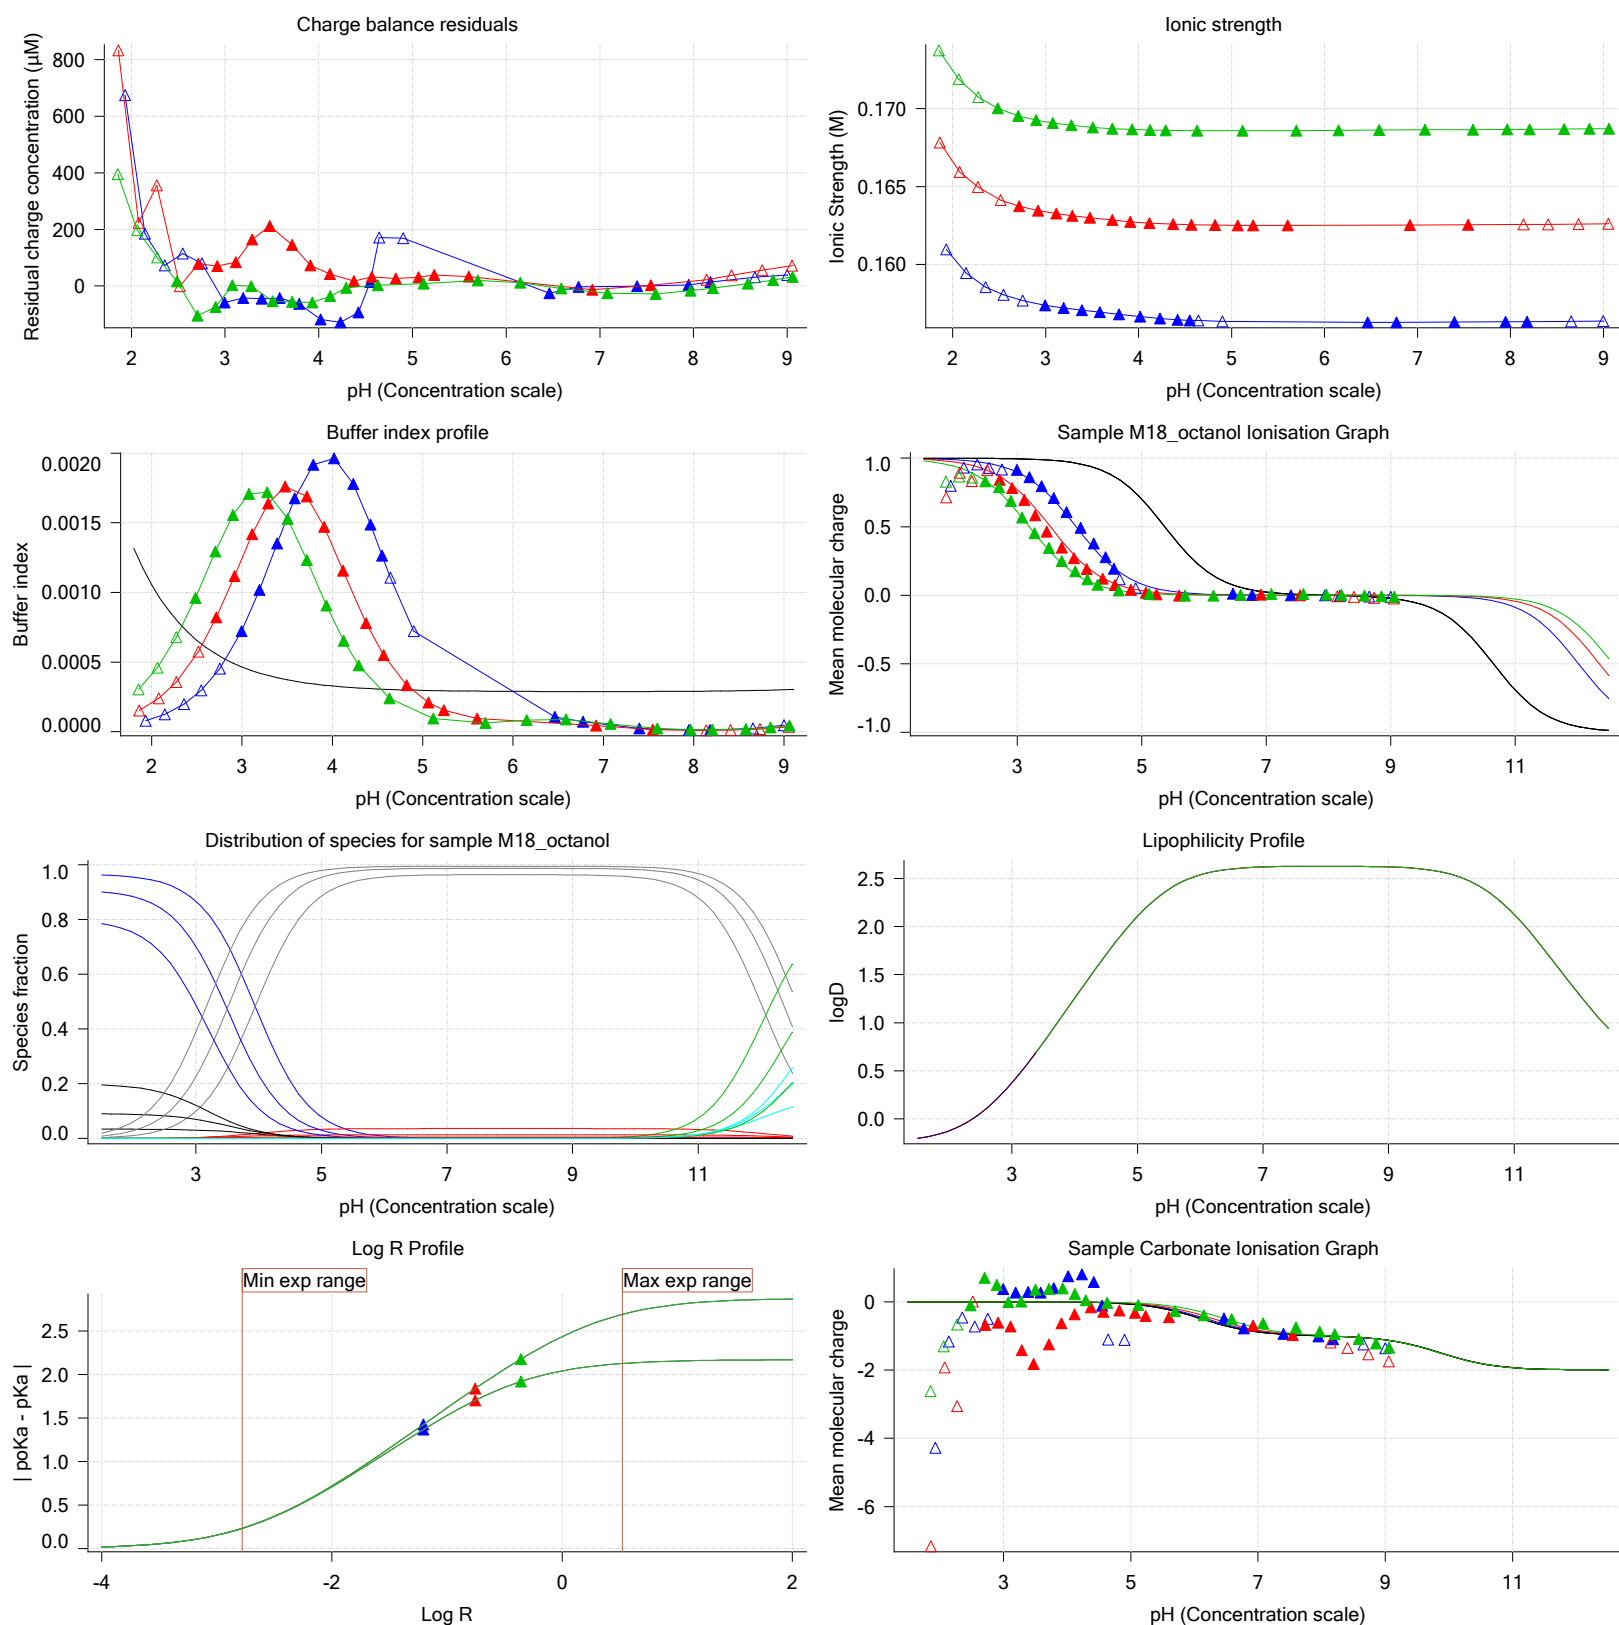

|              |                                                                                                   |                        |                            |
|--------------|---------------------------------------------------------------------------------------------------|------------------------|----------------------------|
| Sample name: | <b>M18_octanol</b>                                                                                | Experiment start time: | <b>3/9/2018 8:37:21 PM</b> |
| Assay name:  | <b>pH-metric high logP</b>                                                                        | Analyst:               | <b>Pion</b>                |
| Assay ID:    | <b>18C-09014</b>                                                                                  | Instrument ID:         | <b>T312060</b>             |
| Filename:    | <b>C:\Sirius_T3\Mehtap\20180309_exp31_logP_T3-2\18C-09014_M18_octanol_pH-metric high logP.t3r</b> |                        |                            |

## Graphs (continued)

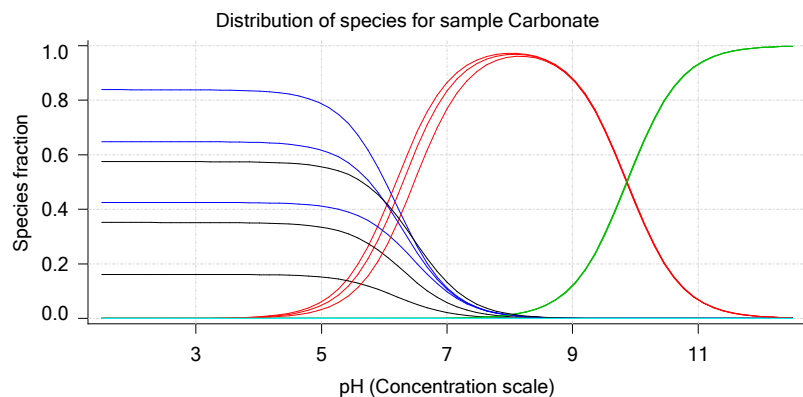

Sample name: **M18\_octanol**  
 Assay name: **pH-metric high logP**  
 Assay ID: **18C-09014**  
 Filename: **C:\Sirius\_T3\Mehtap\20180309\_exp31\_logP\_T3-2\18C-09014\_M18\_octanol\_pH-metric high logP.t3r**

Experiment start time: **3/9/2018 8:37:21 PM**  
 Analyst: **Pion**  
 Instrument ID: **T312060**

## pH-metric high logP Titration 1 of 3 18C-09014 Points 2 to 24

### Overall results

RMSD 0.227  
 Average ionic strength 0.157 M  
 Average temperature 24.9°C  
 Partition ratio 0.0624 : 1  
 Analyte concentration range 3258.0 µM to 3348.4 µM  
 Total points considered 14 of 23

### Warnings and errors

Errors None  
 Warnings None

### Four-Plus parameters

Alpha 0.102 3/9/2018 8:37:21 PM C:\Sirius\_T3\HCl18C09.t3r  
 S 0.9967 3/9/2018 8:37:21 PM C:\Sirius\_T3\HCl18C09.t3r  
 jH 1.2 3/9/2018 8:37:21 PM C:\Sirius\_T3\HCl18C09.t3r  
 jOH 0.0 3/9/2018 8:37:21 PM C:\Sirius\_T3\HCl18C09.t3r

### Titrants

0.50 M HCl 0.999843 3/9/2018 8:37:21 PM C:\Sirius\_T3\HCl18C09.t3r  
 0.50 M KOH 0.999845 3/9/2018 8:37:21 PM C:\Sirius\_T3\KOH18B27.t3r

### Sample

M18\_octanol concentration factor 0.988  
 Base pKa 1 5.37  
 Acid pKa 2 10.65  
 logP (XH<sub>2</sub><sup>+</sup>) -1.08  
 logP (neutral XH) 2.57  
 logP (X<sup>-</sup>) 0.46

### Sample graphs

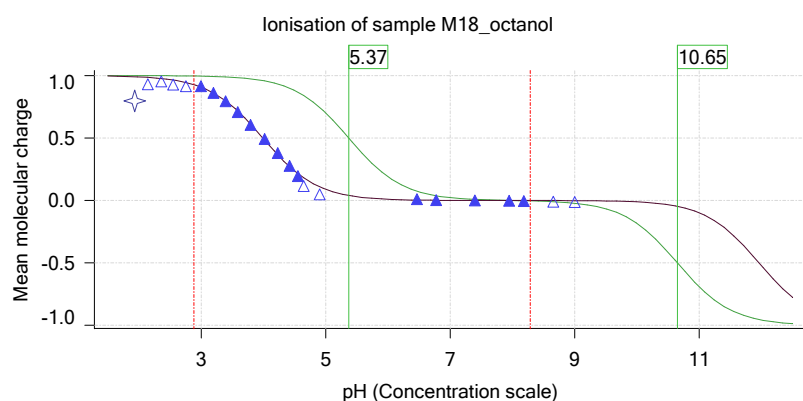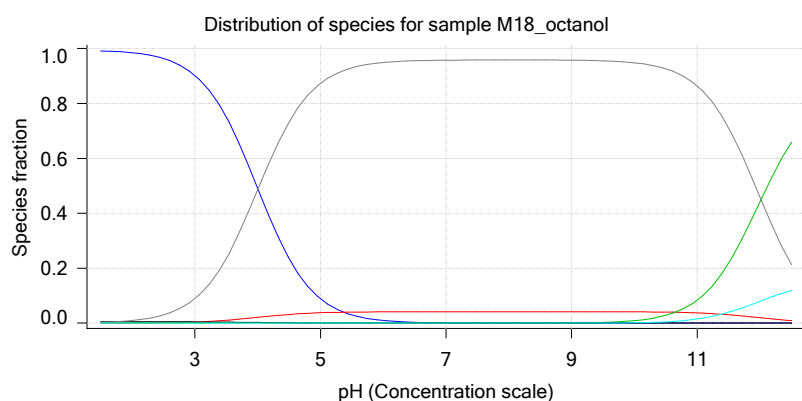

Sample name: **M18\_octanol**  
Assay name: **pH-metric high logP**  
Assay ID: **18C-09014**  
Filename: **C:\Sirius\_T3\Mehtap\20180309\_exp31\_logP\_T3-2\18C-09014\_M18\_octanol\_pH-metric high logP.t3r**

Experiment start time: **3/9/2018 8:37:21 PM**  
Analyst: **Pion**  
Instrument ID: **T312060**

## Sample graphs (continued)

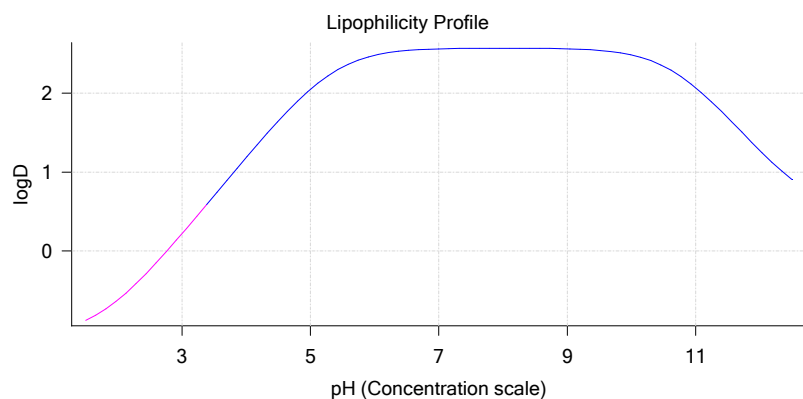

## Sample logD and percent species

| pH     | M18_octanol<br>logD | M18_octanol<br>M18_octanolH2 | M18_octanol<br>M18_octanolH | M18_octanol<br>M18_octanol | M18_octanol<br>M18_octanolH2* | M18_octanol<br>M18_octanolH* | M18_octanol<br>M18_octanol* | Comment       |
|--------|---------------------|------------------------------|-----------------------------|----------------------------|-------------------------------|------------------------------|-----------------------------|---------------|
| 1.000  | -1.01               | 99.39 %                      | 0.00 %                      | 0.00 %                     | 0.51 %                        | 0.10 %                       | 0.00 %                      | Stomach<br>pH |
| 1.200  | -0.97               | 99.33 %                      | 0.01 %                      | 0.00 %                     | 0.51 %                        | 0.16 %                       | 0.00 %                      |               |
| 2.000  | -0.62               | 98.48 %                      | 0.04 %                      | 0.00 %                     | 0.51 %                        | 0.97 %                       | 0.00 %                      |               |
| 3.000  | 0.22                | 90.24 %                      | 0.38 %                      | 0.00 %                     | 0.46 %                        | 8.91 %                       | 0.00 %                      |               |
| 4.000  | 1.18                | 49.14 %                      | 2.10 %                      | 0.00 %                     | 0.25 %                        | 48.51 %                      | 0.00 %                      | Blood pH      |
| 5.000  | 2.05                | 8.85 %                       | 3.77 %                      | 0.00 %                     | 0.05 %                        | 87.33 %                      | 0.00 %                      |               |
| 6.000  | 2.48                | 0.96 %                       | 4.10 %                      | 0.00 %                     | 0.00 %                        | 94.93 %                      | 0.00 %                      |               |
| 6.500  | 2.54                | 0.31 %                       | 4.13 %                      | 0.00 %                     | 0.00 %                        | 95.56 %                      | 0.00 %                      |               |
| 7.000  | 2.56                | 0.10 %                       | 4.14 %                      | 0.00 %                     | 0.00 %                        | 95.76 %                      | 0.00 %                      |               |
| 7.400  | 2.56                | 0.04 %                       | 4.14 %                      | 0.00 %                     | 0.00 %                        | 95.82 %                      | 0.00 %                      |               |
| 8.000  | 2.57                | 0.01 %                       | 4.14 %                      | 0.01 %                     | 0.00 %                        | 95.84 %                      | 0.00 %                      |               |
| 9.000  | 2.56                | 0.00 %                       | 4.14 %                      | 0.09 %                     | 0.00 %                        | 95.75 %                      | 0.02 %                      |               |
| 10.000 | 2.48                | 0.00 %                       | 4.10 %                      | 0.92 %                     | 0.00 %                        | 94.82 %                      | 0.17 %                      |               |
| 11.000 | 2.07                | 0.00 %                       | 3.73 %                      | 8.36 %                     | 0.00 %                        | 86.40 %                      | 1.50 %                      |               |
| 12.000 | 1.27                | 0.00 %                       | 1.98 %                      | 44.28 %                    | 0.00 %                        | 45.77 %                      | 7.97 %                      |               |

## Carbonate and acidity

Carbonate 0.158 mM  
Acidity error -0.037 mM

## Other graphs

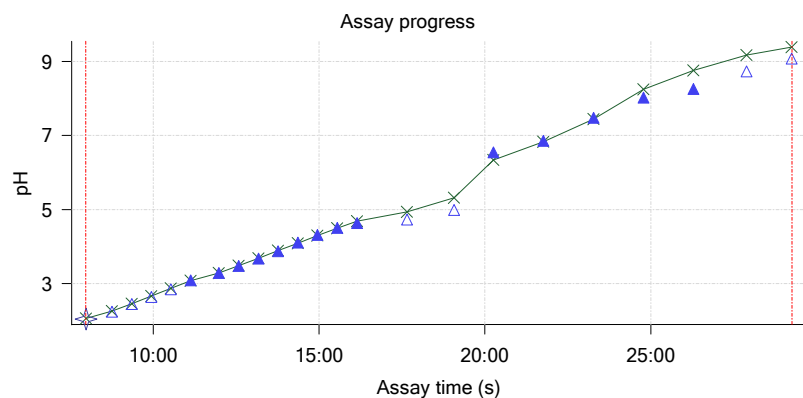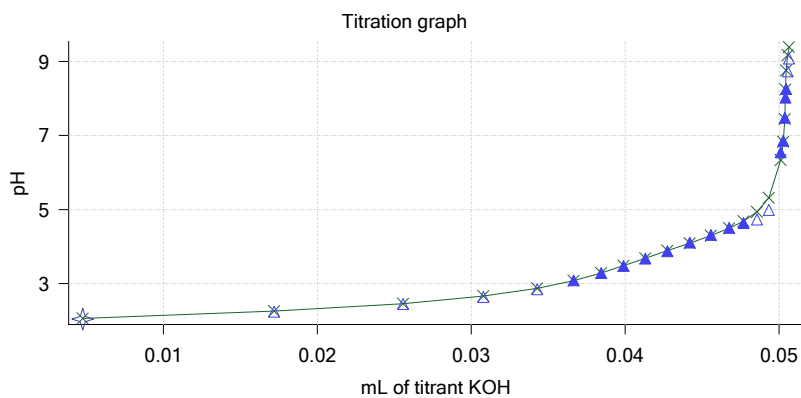

Sample name: **M18\_octanol**  
 Assay name: **pH-metric high logP**  
 Assay ID: **18C-09014**  
 Filename: **C:\Sirius\_T3\Mehtap\20180309\_exp31\_logP\_T3-2\18C-09014\_M18\_octanol\_pH-metric high logP.t3r**

Experiment start time: **3/9/2018 8:37:21 PM**  
 Analyst: **Pion**  
 Instrument ID: **T312060**

## Other graphs (continued)

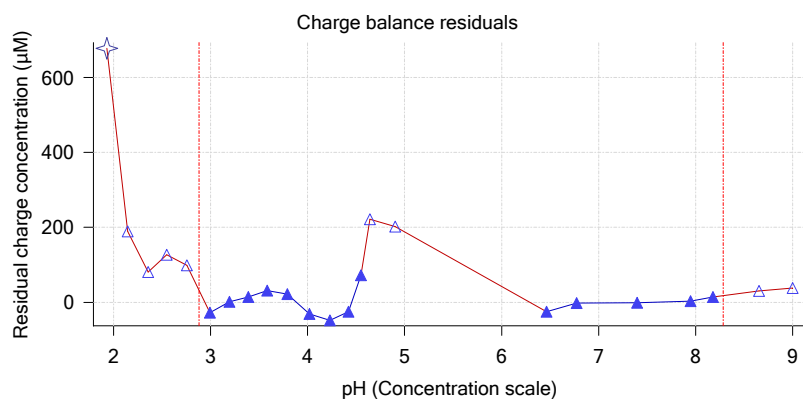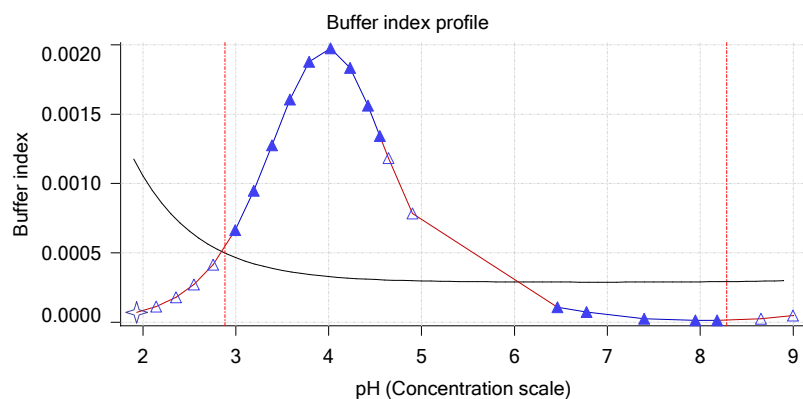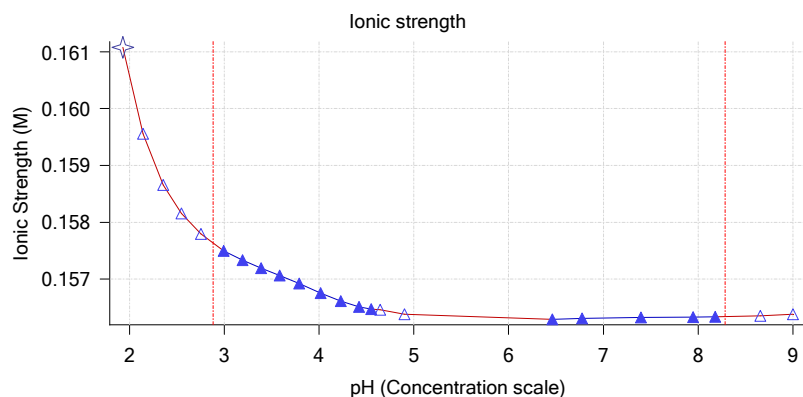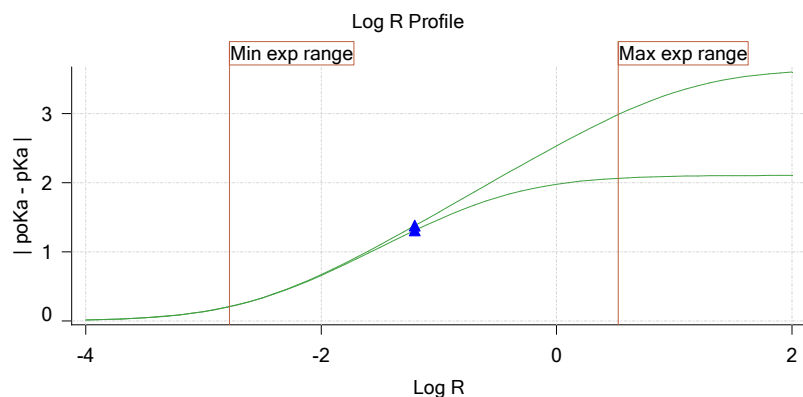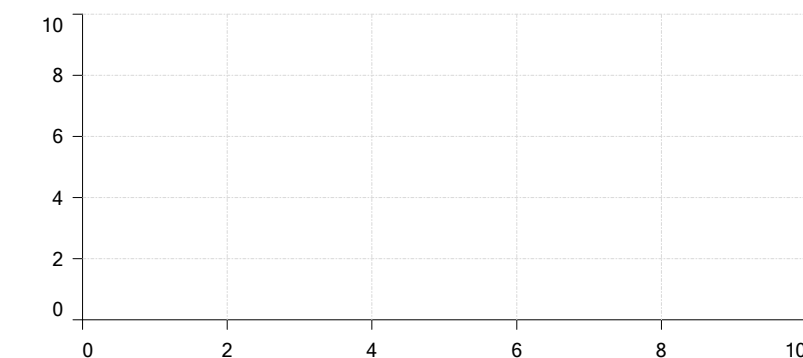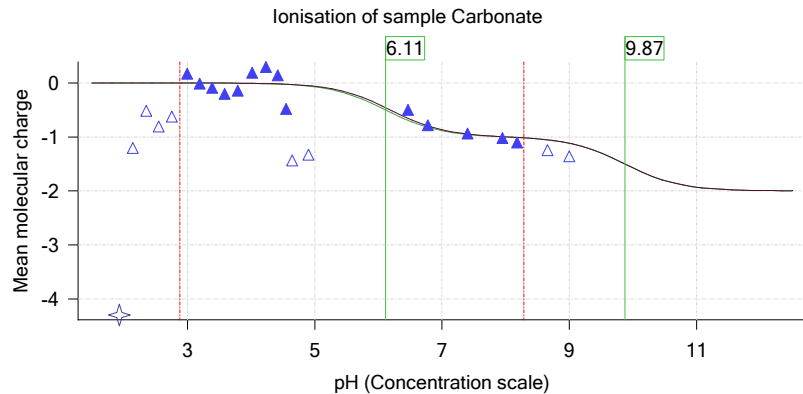

Sample name: **M18\_octanol**  
 Assay name: **pH-metric high logP**  
 Assay ID: **18C-09014**  
 Filename: **C:\Sirius\_T3\Mehtap\20180309\_exp31\_logP\_T3-2\18C-09014\_M18\_octanol\_pH-metric high logP.t3r**

Experiment start time: **3/9/2018 8:37:21 PM**  
 Analyst: **Pion**  
 Instrument ID: **T312060**

## pH-metric high logP Titration 2 of 3 18C-09014 Points 25 to 48

### Overall results

RMSD 0.131  
 Average ionic strength 0.163 M  
 Average temperature 25.0°C  
 Partition ratio 0.1756 : 1  
 Analyte concentration range 2756.3 µM to 2832.3 µM  
 Total points considered 16 of 24

### Warnings and errors

Errors None  
 Warnings None

### Four-Plus parameters

Alpha 0.102 3/9/2018 8:37:21 PM C:\Sirius\_T3\HCl18C09.t3r  
 S 0.9967 3/9/2018 8:37:21 PM C:\Sirius\_T3\HCl18C09.t3r  
 jH 1.2 3/9/2018 8:37:21 PM C:\Sirius\_T3\HCl18C09.t3r  
 jOH 0.0 3/9/2018 8:37:21 PM C:\Sirius\_T3\HCl18C09.t3r

### Titrants

0.50 M HCl 0.999843 3/9/2018 8:37:21 PM C:\Sirius\_T3\HCl18C09.t3r  
 0.50 M KOH 0.999845 3/9/2018 8:37:21 PM C:\Sirius\_T3\KOH18B27.t3r

### Sample

M18\_octanol concentration factor 0.944  
 Base pKa 1 5.37  
 Acid pKa 2 10.65  
 logP (XH<sub>2</sub><sup>+</sup>) -1.92  
 logP (neutral XH) 2.67  
 logP (X<sup>-</sup>) 0.46

### Sample graphs

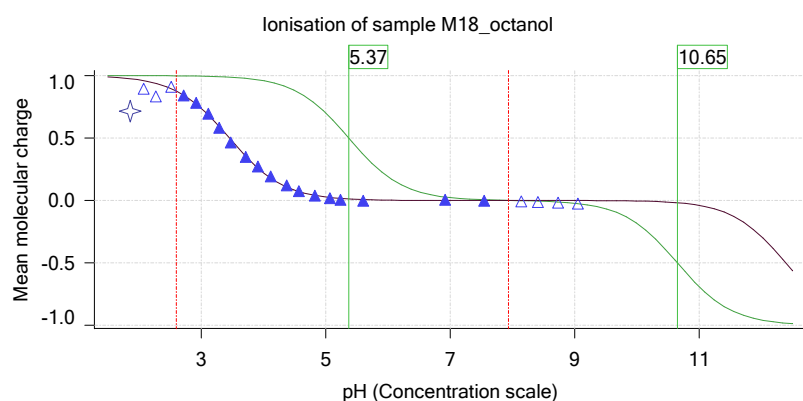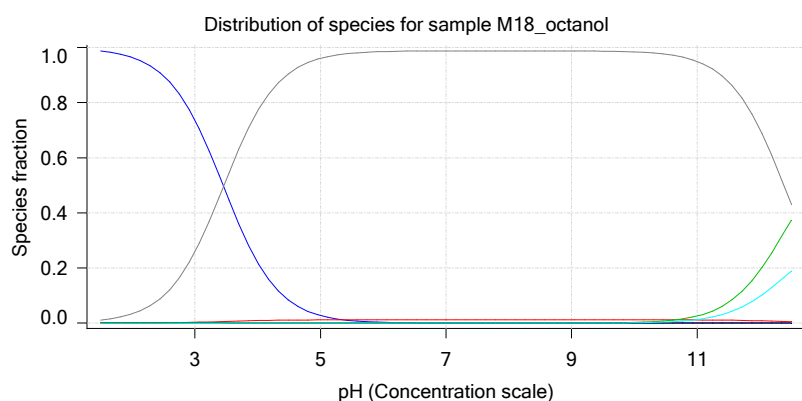

Sample name: **M18\_octanol**  
Assay name: **pH-metric high logP**  
Assay ID: **18C-09014**  
Filename: **C:\Sirius\_T3\Mehtap\20180309\_exp31\_logP\_T3-2\18C-09014\_M18\_octanol\_pH-metric high logP.t3r**

Experiment start time: **3/9/2018 8:37:21 PM**  
Analyst: **Pion**  
Instrument ID: **T312060**

## Sample graphs (continued)

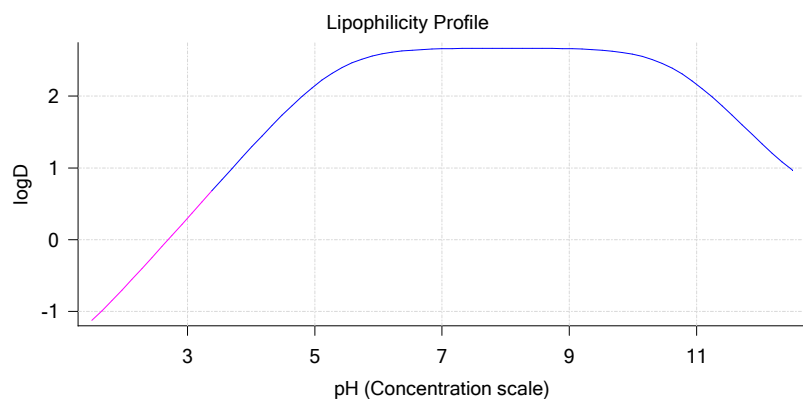

## Sample logD and percent species

| pH     | M18_octanol<br>logD | M18_octanol<br>M18_octanolH2 | M18_octanol<br>M18_octanolH | M18_octanol<br>M18_octanol | M18_octanol<br>M18_octanolH2* | M18_octanol<br>M18_octanolH* | M18_octanol<br>M18_octanol* | Comment       |
|--------|---------------------|------------------------------|-----------------------------|----------------------------|-------------------------------|------------------------------|-----------------------------|---------------|
| 1.000  | -1.50               | 99.44 %                      | 0.00 %                      | 0.00 %                     | 0.21 %                        | 0.35 %                       | 0.00 %                      | Stomach<br>pH |
| 1.200  | -1.36               | 99.23 %                      | 0.01 %                      | 0.00 %                     | 0.21 %                        | 0.55 %                       | 0.00 %                      |               |
| 2.000  | -0.68               | 96.38 %                      | 0.04 %                      | 0.00 %                     | 0.20 %                        | 3.37 %                       | 0.00 %                      |               |
| 3.000  | 0.30                | 73.74 %                      | 0.31 %                      | 0.00 %                     | 0.16 %                        | 25.79 %                      | 0.00 %                      | Blood pH      |
| 4.000  | 1.28                | 22.02 %                      | 0.94 %                      | 0.00 %                     | 0.05 %                        | 76.99 %                      | 0.00 %                      |               |
| 5.000  | 2.14                | 2.75 %                       | 1.17 %                      | 0.00 %                     | 0.01 %                        | 96.07 %                      | 0.00 %                      |               |
| 6.000  | 2.58                | 0.28 %                       | 1.20 %                      | 0.00 %                     | 0.00 %                        | 98.52 %                      | 0.00 %                      |               |
| 6.500  | 2.64                | 0.09 %                       | 1.20 %                      | 0.00 %                     | 0.00 %                        | 98.71 %                      | 0.00 %                      |               |
| 7.000  | 2.66                | 0.03 %                       | 1.20 %                      | 0.00 %                     | 0.00 %                        | 98.77 %                      | 0.00 %                      |               |
| 7.400  | 2.66                | 0.01 %                       | 1.21 %                      | 0.00 %                     | 0.00 %                        | 98.78 %                      | 0.00 %                      |               |
| 8.000  | 2.67                | 0.00 %                       | 1.21 %                      | 0.00 %                     | 0.00 %                        | 98.79 %                      | 0.00 %                      |               |
| 9.000  | 2.66                | 0.00 %                       | 1.20 %                      | 0.03 %                     | 0.00 %                        | 98.75 %                      | 0.01 %                      |               |
| 10.000 | 2.58                | 0.00 %                       | 1.20 %                      | 0.27 %                     | 0.00 %                        | 98.39 %                      | 0.14 %                      |               |
| 11.000 | 2.16                | 0.00 %                       | 1.16 %                      | 2.59 %                     | 0.00 %                        | 94.94 %                      | 1.31 %                      |               |
| 12.000 | 1.36                | 0.00 %                       | 0.86 %                      | 19.18 %                    | 0.00 %                        | 70.24 %                      | 9.72 %                      |               |

## Carbonate and acidity

Carbonate 0.116 mM  
Acidity error -0.547 mM

## Other graphs

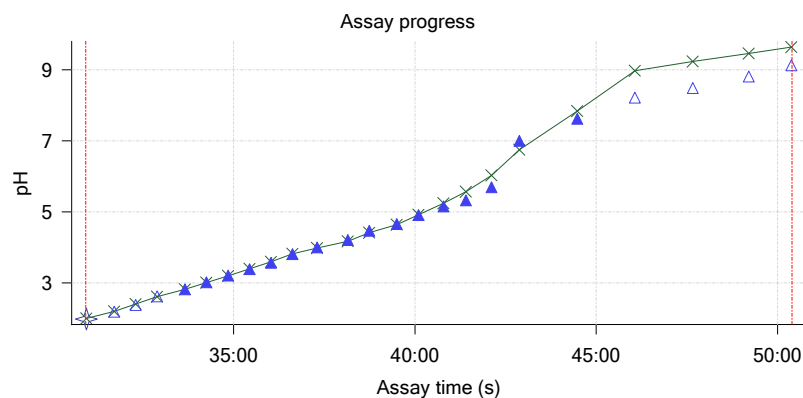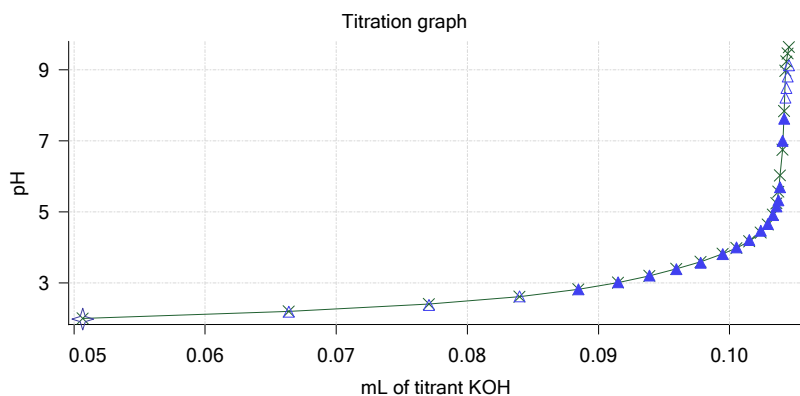



Sample name: **M18\_octanol**  
 Assay name: **pH-metric high logP**  
 Assay ID: **18C-09014**  
 Filename: **C:\Sirius\_T3\Mehtap\20180309\_exp31\_logP\_T3-2\18C-09014\_M18\_octanol\_pH-metric high logP.t3r**

Experiment start time: **3/9/2018 8:37:21 PM**  
 Analyst: **Pion**  
 Instrument ID: **T312060**

## Other graphs (continued)

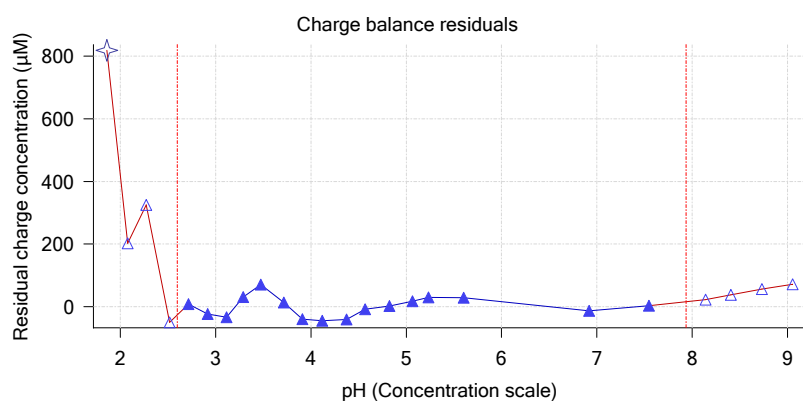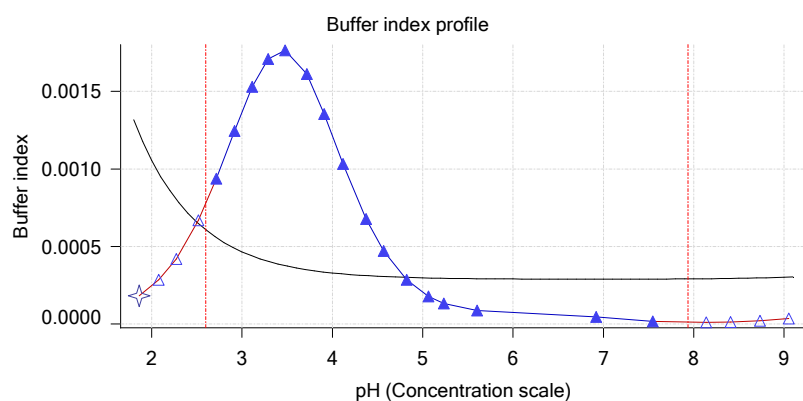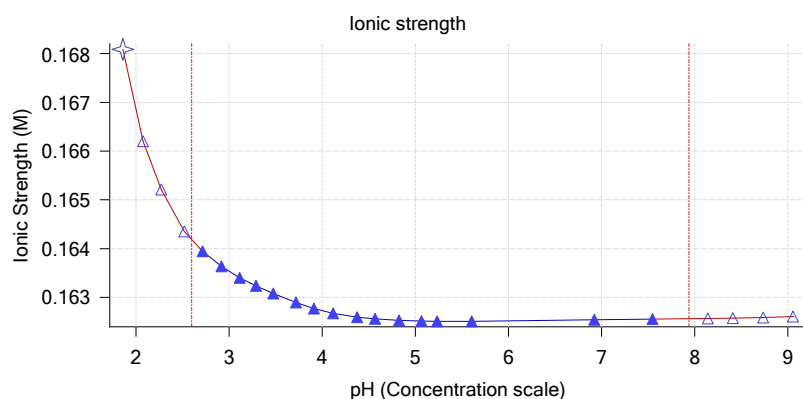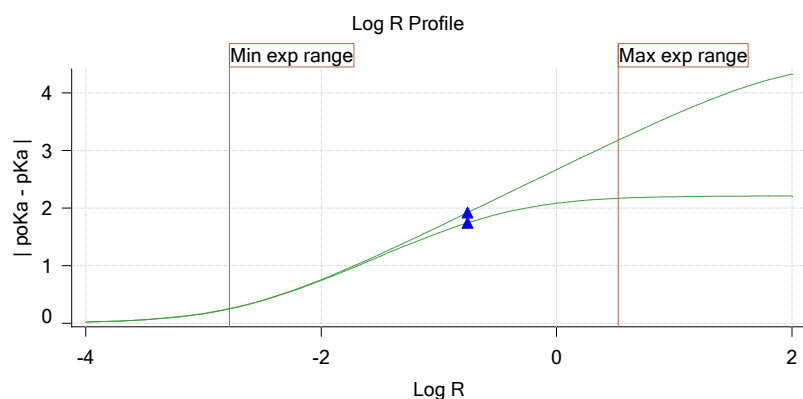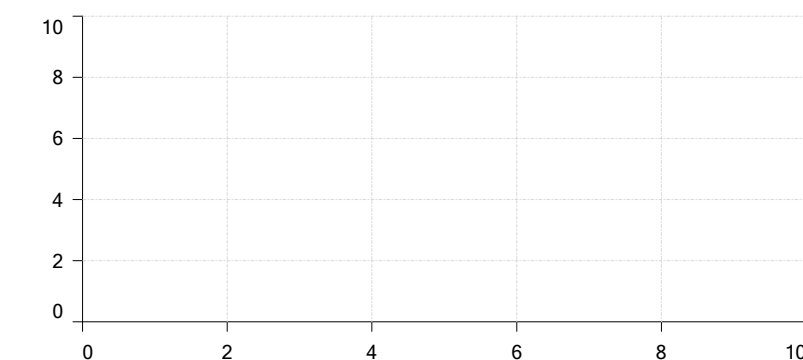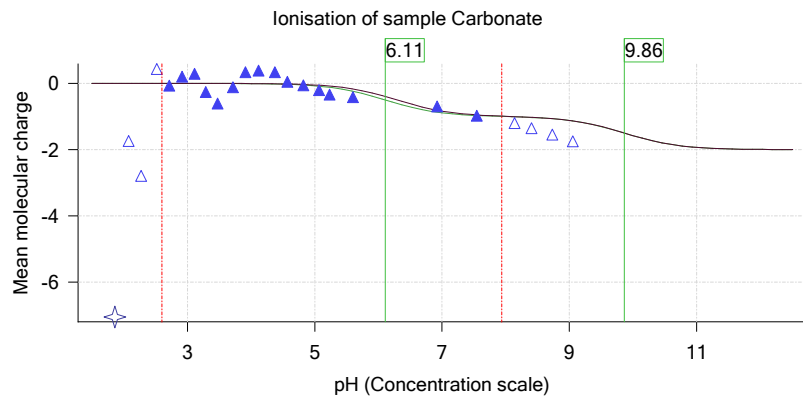

Sample name: **M18\_octanol**  
 Assay name: **pH-metric high logP**  
 Assay ID: **18C-09014**  
 Filename: **C:\Sirius\_T3\Mehtap\20180309\_exp31\_logP\_T3-2\18C-09014\_M18\_octanol\_pH-metric high logP.t3r**

Experiment start time: **3/9/2018 8:37:21 PM**  
 Analyst: **Pion**  
 Instrument ID: **T312060**

## pH-metric high logP Titration 3 of 3 18C-09014 Points 49 to 73

### Overall results

RMSD 0.342  
 Average ionic strength 0.169 M  
 Average temperature 25.0°C  
 Partition ratio 0.4375 : 1  
 Analyte concentration range 2105.7 µM to 2154.4 µM  
 Total points considered 22 of 25

### Warnings and errors

Errors None  
 Warnings One or more logP values out of range  
 Excessive acidity error present

### Four-Plus parameters

Alpha 0.102 3/9/2018 8:37:21 PM C:\Sirius\_T3\HCl18C09.t3r  
 S 0.9967 3/9/2018 8:37:21 PM C:\Sirius\_T3\HCl18C09.t3r  
 jH 1.2 3/9/2018 8:37:21 PM C:\Sirius\_T3\HCl18C09.t3r  
 jOH 0.0 3/9/2018 8:37:21 PM C:\Sirius\_T3\HCl18C09.t3r

### Titrants

0.50 M HCl 0.999843 3/9/2018 8:37:21 PM C:\Sirius\_T3\HCl18C09.t3r  
 0.50 M KOH 0.999845 3/9/2018 8:37:21 PM C:\Sirius\_T3\KOH18B27.t3r

### Sample

M18\_octanol concentration factor 0.993  
 Base pKa 1 5.37  
 Acid pKa 2 10.65  
 logP (XH<sub>2</sub><sup>+</sup>) -2.03  
 logP (neutral XH) 2.50  
 logP (X<sup>-</sup>) 0.46

### Sample graphs

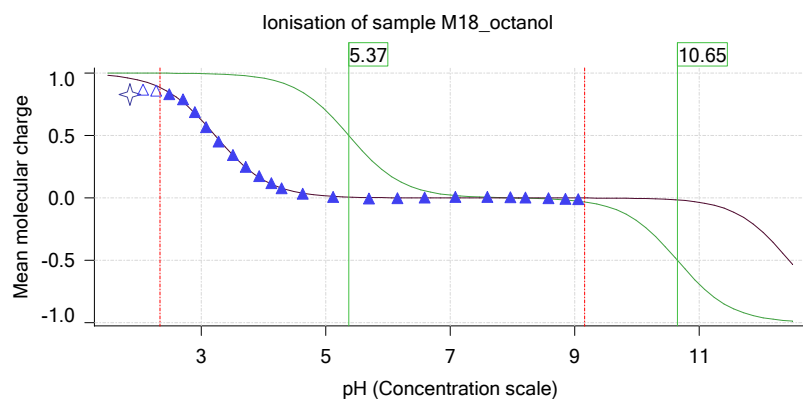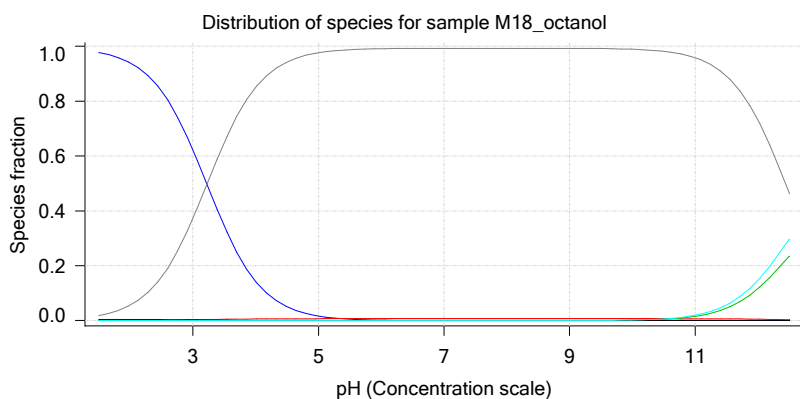

Sample name: **M18\_octanol**  
Assay name: **pH-metric high logP**  
Assay ID: **18C-09014**  
Filename: **C:\Sirius\_T3\Mehtap\20180309\_exp31\_logP\_T3-2\18C-09014\_M18\_octanol\_pH-metric high logP.t3r**

Experiment start time: **3/9/2018 8:37:21 PM**  
Analyst: **Pion**  
Instrument ID: **T312060**

## Sample graphs (continued)

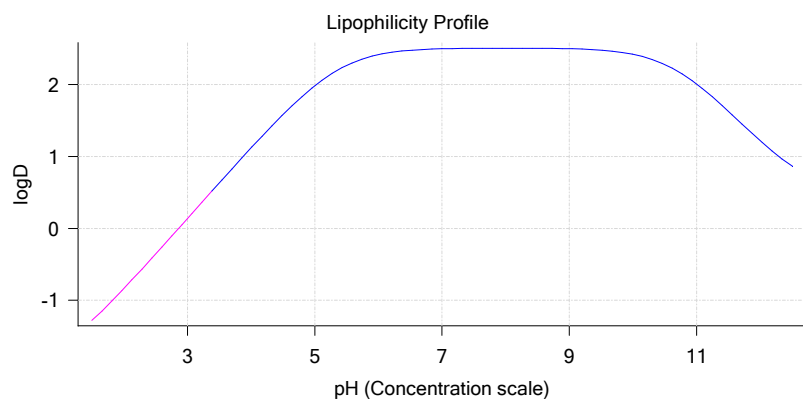

## Sample logD and percent species

| pH     | M18_octanol<br>logD | M18_octanol<br>M18_octanolH2 | M18_octanol<br>M18_octanolH | M18_octanol<br>M18_octanol | M18_octanol<br>M18_octanolH2* | M18_octanol<br>M18_octanolH* | M18_octanol<br>M18_octanol* | Comment       |
|--------|---------------------|------------------------------|-----------------------------|----------------------------|-------------------------------|------------------------------|-----------------------------|---------------|
| 1.000  | -1.64               | 99.00 %                      | 0.00 %                      | 0.00 %                     | 0.40 %                        | 0.59 %                       | 0.00 %                      | Stomach<br>pH |
| 1.200  | -1.51               | 98.66 %                      | 0.01 %                      | 0.00 %                     | 0.40 %                        | 0.93 %                       | 0.00 %                      |               |
| 2.000  | -0.84               | 93.97 %                      | 0.04 %                      | 0.00 %                     | 0.38 %                        | 5.61 %                       | 0.00 %                      |               |
| 3.000  | 0.14                | 62.30 %                      | 0.27 %                      | 0.00 %                     | 0.25 %                        | 37.18 %                      | 0.00 %                      |               |
| 4.000  | 1.12                | 14.25 %                      | 0.61 %                      | 0.00 %                     | 0.06 %                        | 85.08 %                      | 0.00 %                      | Blood pH      |
| 5.000  | 1.98                | 1.64 %                       | 0.70 %                      | 0.00 %                     | 0.01 %                        | 97.66 %                      | 0.00 %                      |               |
| 6.000  | 2.41                | 0.17 %                       | 0.71 %                      | 0.00 %                     | 0.00 %                        | 99.12 %                      | 0.00 %                      |               |
| 6.500  | 2.47                | 0.05 %                       | 0.71 %                      | 0.00 %                     | 0.00 %                        | 99.24 %                      | 0.00 %                      |               |
| 7.000  | 2.49                | 0.02 %                       | 0.71 %                      | 0.00 %                     | 0.00 %                        | 99.27 %                      | 0.00 %                      |               |
| 7.400  | 2.50                | 0.01 %                       | 0.71 %                      | 0.00 %                     | 0.00 %                        | 99.28 %                      | 0.00 %                      |               |
| 8.000  | 2.50                | 0.00 %                       | 0.71 %                      | 0.00 %                     | 0.00 %                        | 99.29 %                      | 0.00 %                      |               |
| 9.000  | 2.50                | 0.00 %                       | 0.71 %                      | 0.02 %                     | 0.00 %                        | 99.25 %                      | 0.02 %                      |               |
| 10.000 | 2.42                | 0.00 %                       | 0.71 %                      | 0.16 %                     | 0.00 %                        | 98.93 %                      | 0.20 %                      |               |
| 11.000 | 2.00                | 0.00 %                       | 0.69 %                      | 1.53 %                     | 0.00 %                        | 95.85 %                      | 1.93 %                      |               |
| 12.000 | 1.22                | 0.00 %                       | 0.52 %                      | 11.69 %                    | 0.00 %                        | 73.05 %                      | 14.75 %                     |               |

## Carbonate and acidity

Carbonate 0.150 mM  
Acidity error -1.102 mM

## Other graphs

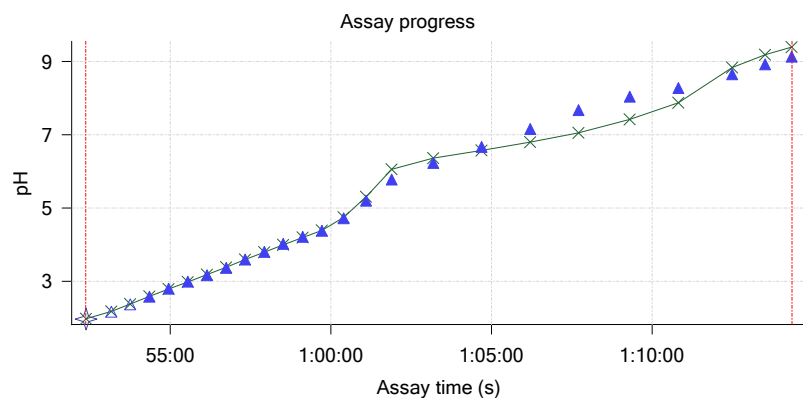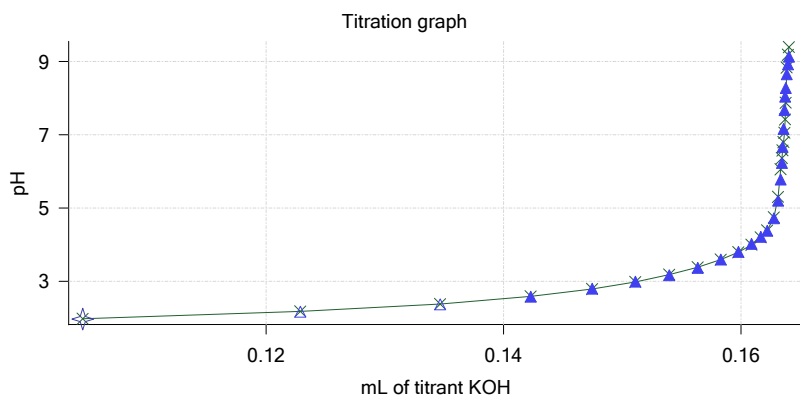

Sample name: **M18\_octanol**  
 Assay name: **pH-metric high logP**  
 Assay ID: **18C-09014**  
 Filename: **C:\Sirius\_T3\Mehtap\20180309\_exp31\_logP\_T3-2\18C-09014\_M18\_octanol\_pH-metric high logP.t3r**

Experiment start time: **3/9/2018 8:37:21 PM**  
 Analyst: **Pion**  
 Instrument ID: **T312060**

## Other graphs (continued)

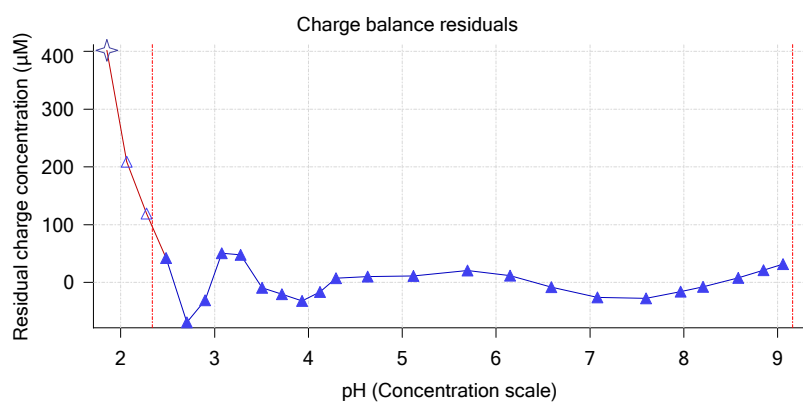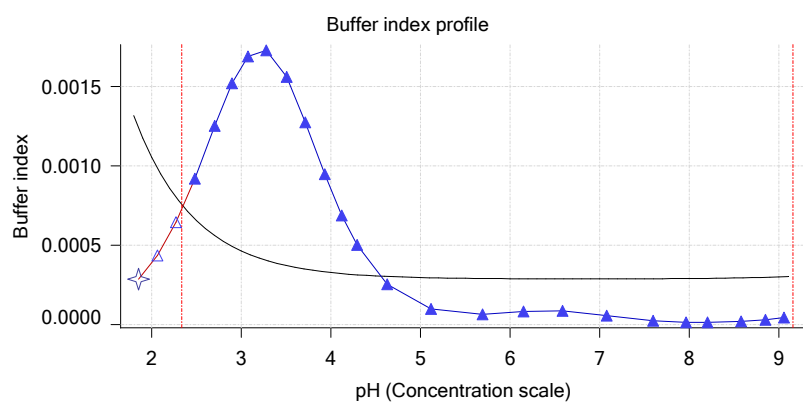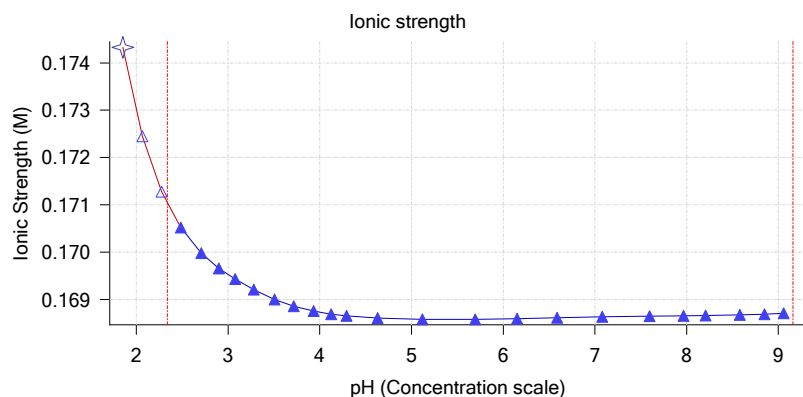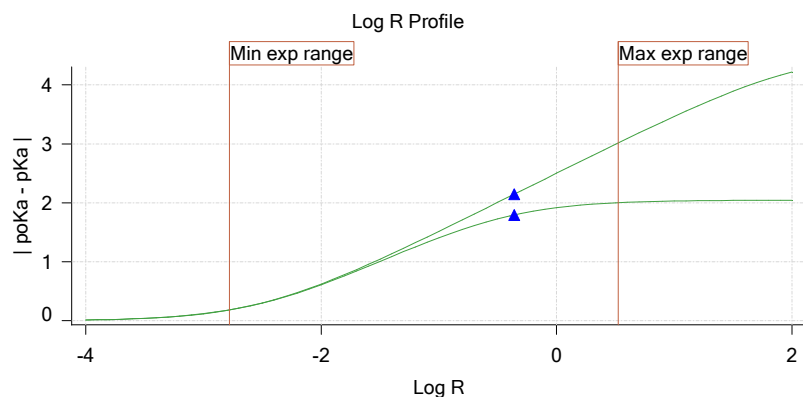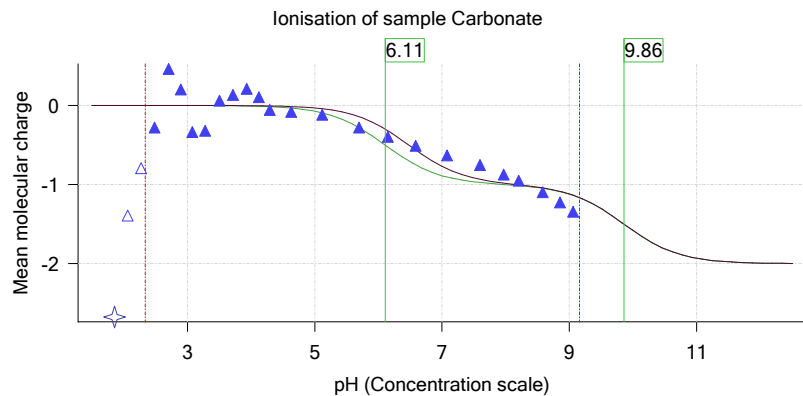

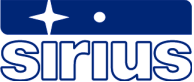

## Assay model

Sample name: **M18\_octanol** Experiment start time: **3/9/2018 8:37:21 PM**  
Assay name: **pH-metric high logP** Analyst: **Pion**  
Assay ID: **18C-09014** Instrument ID: **T312060**  
Filename: **C:\Sirius\_T3\Mehtap\20180309\_exp31\_logP\_T3-2\18C-09014\_M18\_octanol\_pH-metric high logP.t3r**

## Assay Model

| Settings                          | Value        | Date/Time changed    | Imported from      |
|-----------------------------------|--------------|----------------------|--------------------|
| Sample name                       | M18_octanol  | 2/27/2018 7:08:39 PM | User entered value |
| Sample by                         | Weight       |                      | Default value      |
| Sample weight                     | 0.001480 g   | 3/9/2018 2:22:36 PM  | User entered value |
| Formula weight                    | 267.11 g/mol | 2/27/2018 7:08:39 PM | User entered value |
| Solubility                        | Unknown      |                      | Default value      |
| Molecular weight                  | 267.11       | 2/27/2018 7:08:39 PM | User entered value |
| Individual pKa ionic environments | No           |                      | Default value      |
| Number of pKas                    | 2            | 2/27/2018 7:08:39 PM | User entered value |
| Sample is a                       | Ampholyte    | 2/27/2018 7:08:39 PM | User entered value |
| pKa 1                             | 5.37         | 2/27/2018 7:08:39 PM | User entered value |
| Type                              | Base         | 2/27/2018 7:08:39 PM | User entered value |
| pKa 2                             | 10.65        | 2/27/2018 7:08:39 PM | User entered value |
| Type                              | Acid         | 2/27/2018 7:08:39 PM | User entered value |
| logp (XH2 +)                      | -0.35        | 2/28/2018 3:20:28 PM | User entered value |
| logP (neutral XH)                 | 2.57         | 3/2/2018 4:34:50 PM  | User entered value |
| logP (X -)                        | 0.46         | 2/27/2018 7:09:34 PM | User entered value |

## Events

| Time    | Event                  | Water      | Acid       | Base       | Octanol    | pH    | dpH/dt   | pH R-squared | pH SD   | dpH/<br>time      |
|---------|------------------------|------------|------------|------------|------------|-------|----------|--------------|---------|-------------------|
| 4:57.9  | Manual volume addition |            |            |            | 0.10000 mL |       |          |              |         |                   |
| 4:59.0  | Initial pH = 7.17      |            |            |            |            |       |          |              |         |                   |
| 7:58.6  | Data point 2           | 1.50000 mL | 0.05002 mL | 0.00475 mL | 0.10000 mL | 2.041 | -0.00537 | 0.75188      | 0.00031 | 10.5<br>s         |
| 8:45.2  | Data point 3           | 1.50000 mL | 0.05002 mL | 0.01719 mL | 0.10000 mL | 2.248 | -0.00630 | 0.13591      | 0.00084 | 10.0<br>s         |
| 9:20.9  | Data point 4           | 1.50000 mL | 0.05002 mL | 0.02556 mL | 0.10000 mL | 2.455 | -0.00491 | 0.10647      | 0.00074 | 10.0<br>s         |
| 9:56.5  | Data point 5           | 1.50000 mL | 0.05002 mL | 0.03079 mL | 0.10000 mL | 2.645 | -0.00008 | 0.00076      | 0.00014 | 10.0<br>s         |
| 10:31.9 | Data point 6           | 1.50000 mL | 0.05002 mL | 0.03429 mL | 0.10000 mL | 2.849 | -0.00867 | 0.76331      | 0.00049 | 10.5<br>s         |
| 11:07.9 | Data point 7           | 1.50000 mL | 0.05002 mL | 0.03667 mL | 0.10000 mL | 3.088 | -0.00680 | 0.26943      | 0.00065 | 10.0<br>s         |
| 11:58.8 | Data point 8           | 1.50000 mL | 0.05002 mL | 0.03845 mL | 0.10000 mL | 3.287 | -0.00858 | 0.64011      | 0.00053 | 10.5<br>s         |
| 12:34.8 | Data point 9           | 1.50000 mL | 0.05002 mL | 0.03991 mL | 0.10000 mL | 3.481 | -0.00517 | 0.71303      | 0.00030 | 10.0<br>s         |
| 13:10.2 | Data point 10          | 1.50000 mL | 0.05002 mL | 0.04132 mL | 0.10000 mL | 3.675 | -0.01100 | 0.68415      | 0.00066 | 10.0<br>s         |
| 13:45.7 | Data point 11          | 1.50000 mL | 0.05002 mL | 0.04276 mL | 0.10000 mL | 3.880 | -0.01228 | 0.70505      | 0.00072 | 10.5<br>s         |
| 14:21.7 | Data point 12          | 1.50000 mL | 0.05002 mL | 0.04421 mL | 0.10000 mL | 4.108 | -0.01324 | 0.78765      | 0.00074 | 10.0<br>s         |
| 14:57.1 | Data point 13          | 1.50000 mL | 0.05002 mL | 0.04558 mL | 0.10000 mL | 4.320 | -0.00760 | 0.32722      | 0.00066 | 10.0<br>s         |
| 15:32.6 | Data point 14          | 1.50000 mL | 0.05002 mL | 0.04675 mL | 0.10000 mL | 4.509 | -0.01875 | 0.88887      | 0.00098 | 10.5<br>s         |
| 16:08.5 | Data point 15          | 1.50000 mL | 0.05002 mL | 0.04770 mL | 0.10000 mL | 4.638 | -0.09531 | 0.99824      | 0.00471 | Time<br>out<br>at |
| 17:39.0 | Data point 16          | 1.50000 mL | 0.05002 mL | 0.04857 mL | 0.10000 mL | 4.731 | -0.03485 | 0.99545      | 0.00173 | Time<br>out<br>at |
| 19:04.3 | Data point 17          | 1.50000 mL | 0.05002 mL | 0.04934 mL | 0.10000 mL | 4.989 | -0.01963 | 0.98594      | 0.00098 | 40.5<br>s         |

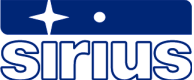

## Assay Events

Sample name: **M18\_octanol**  
Assay name: **pH-metric high logP**  
Assay ID: **18C-09014**  
Filename: **C:\Sirius\_T3\Mehtap\20180309\_exp31\_logP\_T3-2\18C-09014\_M18\_octanol\_pH-metric high logP.t3r**

Experiment start time: **3/9/2018 8:37:21 PM**  
Analyst: **Pion**  
Instrument ID: **T312060**

## Events (continued)

| Time      | Event         | Water      | Acid       | Base       | Octanol    | pH    | dpH/dt   | pH R-squared | pH SD   | dpH/dt time         |
|-----------|---------------|------------|------------|------------|------------|-------|----------|--------------|---------|---------------------|
| 20:15.5   | Data point 18 | 1.50000 mL | 0.05002 mL | 0.05012 mL | 0.10000 mL | 6.544 | -0.03976 | 0.99389      | 0.00197 | Timed out at 59.5 s |
| 21:46.0   | Data point 19 | 1.50000 mL | 0.05002 mL | 0.05028 mL | 0.10000 mL | 6.855 | -0.03344 | 0.99646      | 0.00165 | Timed out at 59.5 s |
| 23:16.5   | Data point 20 | 1.50000 mL | 0.05002 mL | 0.05038 mL | 0.10000 mL | 7.476 | -0.05450 | 0.99713      | 0.00270 | Timed out at 59.5 s |
| 24:47.0   | Data point 21 | 1.50000 mL | 0.05002 mL | 0.05042 mL | 0.10000 mL | 8.023 | -0.06285 | 0.99743      | 0.00311 | Timed out at 59.5 s |
| 26:17.5   | Data point 22 | 1.50000 mL | 0.05002 mL | 0.05047 mL | 0.10000 mL | 8.256 | -0.04162 | 0.99520      | 0.00206 | Timed out at 59.5 s |
| 27:53.2   | Data point 23 | 1.50000 mL | 0.05002 mL | 0.05056 mL | 0.10000 mL | 8.730 | -0.01987 | 0.99215      | 0.00099 | 51.0 s              |
| 29:14.8   | Data point 24 | 1.50000 mL | 0.05002 mL | 0.05066 mL | 0.10000 mL | 9.072 | -0.01966 | 0.96316      | 0.00099 | 38.5 s              |
| 30:56.2   | Data point 25 | 1.50000 mL | 0.10564 mL | 0.05066 mL | 0.30000 mL | 1.973 | -0.00826 | 0.81865      | 0.00045 | 10.0 s              |
| 31:42.4   | Data point 26 | 1.50000 mL | 0.10564 mL | 0.06639 mL | 0.30000 mL | 2.182 | -0.00740 | 0.49850      | 0.00052 | 10.0 s              |
| 32:18.0   | Data point 27 | 1.50000 mL | 0.10564 mL | 0.07707 mL | 0.30000 mL | 2.373 | -0.00564 | 0.17659      | 0.00066 | 10.0 s              |
| 32:53.6   | Data point 28 | 1.50000 mL | 0.10564 mL | 0.08398 mL | 0.30000 mL | 2.615 | 0.00002  | 0.00001      | 0.00050 | 10.0 s              |
| 33:39.6   | Data point 29 | 1.50000 mL | 0.10564 mL | 0.08848 mL | 0.30000 mL | 2.812 | -0.00441 | 0.74067      | 0.00025 | 10.0 s              |
| 34:15.1   | Data point 30 | 1.50000 mL | 0.10564 mL | 0.09151 mL | 0.30000 mL | 3.012 | -0.01157 | 0.77811      | 0.00065 | 10.5 s              |
| 34:51.1   | Data point 31 | 1.50000 mL | 0.10564 mL | 0.09389 mL | 0.30000 mL | 3.207 | -0.00365 | 0.80988      | 0.00020 | 10.0 s              |
| 35:26.5   | Data point 32 | 1.50000 mL | 0.10564 mL | 0.09593 mL | 0.30000 mL | 3.381 | -0.00664 | 0.44901      | 0.00049 | 10.0 s              |
| 36:01.9   | Data point 33 | 1.50000 mL | 0.10564 mL | 0.09779 mL | 0.30000 mL | 3.567 | -0.01484 | 0.65999      | 0.00090 | 10.0 s              |
| 36:37.4   | Data point 34 | 1.50000 mL | 0.10564 mL | 0.09948 mL | 0.30000 mL | 3.807 | -0.00593 | 0.14880      | 0.00076 | 10.0 s              |
| 37:18.0   | Data point 35 | 1.50000 mL | 0.10564 mL | 0.10052 mL | 0.30000 mL | 3.999 | -0.00035 | 0.00113      | 0.00051 | 10.0 s              |
| 38:08.9   | Data point 36 | 1.50000 mL | 0.10564 mL | 0.10151 mL | 0.30000 mL | 4.207 | -0.00527 | 0.79747      | 0.00029 | 10.0 s              |
| 38:44.4   | Data point 37 | 1.50000 mL | 0.10564 mL | 0.10237 mL | 0.30000 mL | 4.462 | -0.00775 | 0.68238      | 0.00046 | 10.0 s              |
| 39:30.1   | Data point 38 | 1.50000 mL | 0.10564 mL | 0.10292 mL | 0.30000 mL | 4.655 | -0.00577 | 0.49479      | 0.00040 | 10.5 s              |
| 40:06.0   | Data point 39 | 1.50000 mL | 0.10564 mL | 0.10332 mL | 0.30000 mL | 4.910 | -0.01228 | 0.58176      | 0.00079 | 10.5 s              |
| 40:47.1   | Data point 40 | 1.50000 mL | 0.10564 mL | 0.10358 mL | 0.30000 mL | 5.151 | -0.01553 | 0.76936      | 0.00087 | 12.0 s              |
| 41:24.5   | Data point 41 | 1.50000 mL | 0.10564 mL | 0.10372 mL | 0.30000 mL | 5.319 | -0.01184 | 0.46775      | 0.00086 | 11.5 s              |
| 42:06.6   | Data point 42 | 1.50000 mL | 0.10564 mL | 0.10386 mL | 0.30000 mL | 5.687 | -0.01865 | 0.92517      | 0.00096 | 15.5 s              |
| 42:52.8   | Data point 43 | 1.50000 mL | 0.10564 mL | 0.10405 mL | 0.30000 mL | 7.000 | -0.08496 | 0.99448      | 0.00421 | Timed out at 59.5 s |
| 44:28.4   | Data point 44 | 1.50000 mL | 0.10564 mL | 0.10416 mL | 0.30000 mL | 7.624 | -0.06603 | 0.99772      | 0.00326 | Timed out at 59.5 s |
| 46:04.1   | Data point 45 | 1.50000 mL | 0.10564 mL | 0.10426 mL | 0.30000 mL | 8.216 | -0.04320 | 0.99574      | 0.00214 | Timed out at 59.5 s |
| 47:39.9   | Data point 46 | 1.50000 mL | 0.10564 mL | 0.10433 mL | 0.30000 mL | 8.482 | -0.01966 | 0.98330      | 0.00098 | 57.0 s              |
| 49:12.6   | Data point 47 | 1.50000 mL | 0.10564 mL | 0.10442 mL | 0.30000 mL | 8.807 | -0.02001 | 0.98580      | 0.00100 | 40.0 s              |
| 50:23.1   | Data point 48 | 1.50000 mL | 0.10564 mL | 0.10454 mL | 0.30000 mL | 9.125 | -0.01779 | 0.90618      | 0.00092 | 34.5 s              |
| 52:23.2   | Data point 49 | 1.50000 mL | 0.16729 mL | 0.10454 mL | 0.80000 mL | 1.966 | -0.01371 | 0.95560      | 0.00069 | 10.5 s              |
| 53:10.0   | Data point 50 | 1.50000 mL | 0.16729 mL | 0.12288 mL | 0.80000 mL | 2.170 | 0.00380  | 0.50246      | 0.00026 | 10.0 s              |
| 53:45.8   | Data point 51 | 1.50000 mL | 0.16729 mL | 0.13467 mL | 0.80000 mL | 2.375 | 0.01474  | 0.76262      | 0.00083 | 10.0 s              |
| 54:21.4   | Data point 52 | 1.50000 mL | 0.16729 mL | 0.14229 mL | 0.80000 mL | 2.582 | -0.00433 | 0.22604      | 0.00045 | 10.0 s              |
| 54:56.9   | Data point 53 | 1.50000 mL | 0.16729 mL | 0.14746 mL | 0.80000 mL | 2.802 | -0.01110 | 0.57112      | 0.00072 | 10.5 s              |
| 55:32.9   | Data point 54 | 1.50000 mL | 0.16729 mL | 0.15110 mL | 0.80000 mL | 2.992 | -0.00395 | 0.04126      | 0.00096 | 10.5 s              |
| 56:09.0   | Data point 55 | 1.50000 mL | 0.16729 mL | 0.15398 mL | 0.80000 mL | 3.169 | 0.00169  | 0.00837      | 0.00091 | 10.0 s              |
| 56:44.4   | Data point 56 | 1.50000 mL | 0.16729 mL | 0.15637 mL | 0.80000 mL | 3.371 | -0.00442 | 0.51991      | 0.00030 | 10.0 s              |
| 57:20.0   | Data point 57 | 1.50000 mL | 0.16729 mL | 0.15832 mL | 0.80000 mL | 3.598 | -0.00476 | 0.13870      | 0.00063 | 10.5 s              |
| 57:55.8   | Data point 58 | 1.50000 mL | 0.16729 mL | 0.15981 mL | 0.80000 mL | 3.807 | -0.00790 | 0.80262      | 0.00044 | 10.0 s              |
| 58:31.3   | Data point 59 | 1.50000 mL | 0.16729 mL | 0.16091 mL | 0.80000 mL | 4.022 | 0.00289  | 0.02519      | 0.00090 | 10.5 s              |
| 59:07.2   | Data point 60 | 1.50000 mL | 0.16729 mL | 0.16169 mL | 0.80000 mL | 4.213 | 0.00323  | 0.17283      | 0.00038 | 10.5 s              |
| 59:43.0   | Data point 61 | 1.50000 mL | 0.16729 mL | 0.16223 mL | 0.80000 mL | 4.381 | -0.00427 | 0.08186      | 0.00074 | 10.5 s              |
| 1:00:24.2 | Data point 62 | 1.50000 mL | 0.16729 mL | 0.16279 mL | 0.80000 mL | 4.718 | -0.01425 | 0.87866      | 0.00075 | 11.0 s              |
| 1:01:05.7 | Data point 63 | 1.50000 mL | 0.16729 mL | 0.16315 mL | 0.80000 mL | 5.204 | -0.00635 | 0.10706      | 0.00096 | 12.0 s              |
| 1:01:53.3 | Data point 64 | 1.50000 mL | 0.16729 mL | 0.16336 mL | 0.80000 mL | 5.779 | -0.01830 | 0.86406      | 0.00097 | 47.0 s              |
| 1:03:10.9 | Data point 65 | 1.50000 mL | 0.16729 mL | 0.16345 mL | 0.80000 mL | 6.233 | -0.02014 | 0.98026      | 0.00100 | Timed out at 59.5 s |

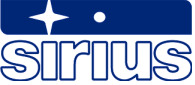

## Assay Events

Sample name: **M18\_octanol**  
Assay name: **pH-metric high logP**  
Assay ID: **18C-09014**  
Filename: **C:\Sirius\_T3\Mehtap\20180309\_exp31\_logP\_T3-2\18C-09014\_M18\_octanol\_pH-metric high logP.t3r**

Experiment start time: **3/9/2018 8:37:21 PM**  
Analyst: **Pion**  
Instrument ID: **T312060**

**Events (continued)**

| Time      | Event         | Water      | Acid       | Base       | Octanol    | pH    | dpH/dt   | pH R-squared | pH SD   | dpH/dt time         |
|-----------|---------------|------------|------------|------------|------------|-------|----------|--------------|---------|---------------------|
| 1:04:41.4 | Data point 66 | 1.50000 mL | 0.16729 mL | 0.16352 mL | 0.80000 mL | 6.668 | -0.04896 | 0.99508      | 0.00242 | Timed out at 59.5 s |
| 1:06:12.0 | Data point 67 | 1.50000 mL | 0.16729 mL | 0.16359 mL | 0.80000 mL | 7.159 | -0.06899 | 0.99765      | 0.00341 | Timed out at 59.5 s |
| 1:07:42.4 | Data point 68 | 1.50000 mL | 0.16729 mL | 0.16366 mL | 0.80000 mL | 7.675 | -0.06553 | 0.99682      | 0.00324 | Timed out at 59.5 s |
| 1:09:18.0 | Data point 69 | 1.50000 mL | 0.16729 mL | 0.16373 mL | 0.80000 mL | 8.043 | -0.04078 | 0.98943      | 0.00202 | Timed out at 59.5 s |
| 1:10:48.5 | Data point 70 | 1.50000 mL | 0.16729 mL | 0.16378 mL | 0.80000 mL | 8.282 | -0.02444 | 0.97943      | 0.00122 | Timed out at 59.5 s |
| 1:12:29.2 | Data point 71 | 1.50000 mL | 0.16729 mL | 0.16388 mL | 0.80000 mL | 8.654 | -0.01571 | 0.67890      | 0.00094 | 25.5 s              |
| 1:13:30.4 | Data point 72 | 1.50000 mL | 0.16729 mL | 0.16397 mL | 0.80000 mL | 8.923 | -0.00987 | 0.25217      | 0.00097 | 14.0 s              |
| 1:14:20.0 | Data point 73 | 1.50000 mL | 0.16729 mL | 0.16406 mL | 0.80000 mL | 9.132 | -0.01934 | 0.95656      | 0.00098 | 25.0 s              |
| 1:14:54.1 | Assay volumes | 1.50000 mL | 0.16729 mL | 0.16406 mL | 0.80000 mL |       |          |              |         |                     |

Sample name: **M18\_octanol**  
 Assay name: **pH-metric high logP**  
 Assay ID: **18C-09014**  
 Filename: **C:\Sirius\_T3\Mehtap\20180309\_exp31\_logP\_T3-2\18C-09014\_M18\_octanol\_pH-metric high logP.t3r**

Experiment start time: **3/9/2018 8:37:21 PM**  
 Analyst: **Pion**  
 Instrument ID: **T312060**

## Assay Settings

| Setting                             | Value              | Original Value | Date/Time changed | Imported from |
|-------------------------------------|--------------------|----------------|-------------------|---------------|
| <b>General Settings</b>             |                    |                |                   |               |
| Analyst name                        | Pion               |                |                   |               |
| <b>Standard Experiment Settings</b> |                    |                |                   |               |
| Number of titrations                | 3                  |                |                   |               |
| Minimum pH                          | 2.000              |                |                   |               |
| Maximum pH                          | 9.000              |                |                   |               |
| pH step between points of           | 0.200              |                |                   |               |
| Minimum titrant addition            | 0.00002 mL         |                |                   |               |
| Maximum titrant addition            | 0.10000 mL         |                |                   |               |
| Argon flow rate                     | 100%               |                |                   |               |
| Start titration using               | Cautious pH adjust |                |                   |               |
| <b>Advanced General Settings</b>    |                    |                |                   |               |
| Detect turbidity using              | None               |                |                   |               |
| Collect turbidity sensor data       | No                 |                |                   |               |
| Collect UV spectra                  | No                 |                |                   |               |
| Stir after titrant addition for     | 5 seconds          |                |                   |               |
| For titrant addition, stir at       | 10%                |                |                   |               |
| <b>Titration Pre-Dose</b>           |                    |                |                   |               |
| Titration pre-dose                  | None               |                |                   |               |
| <b>Assay Medium</b>                 |                    |                |                   |               |
| ISA water volume                    | 1.50 mL            |                |                   |               |
| Water added                         | Automatic          |                |                   |               |
| Partition solvent type              | Octanol            |                |                   |               |
| Partition volume                    | 0.100 mL           |                |                   |               |
| Partition solvent added             | Manual in advance  |                |                   |               |
| After partition addition, stir for  | 1 seconds          |                |                   |               |
| <b>Sample Sonication</b>            |                    |                |                   |               |
| Sonicate                            | Yes                |                |                   |               |
| Adjust pH for sonication            | No                 |                |                   |               |
| Sonicate for                        | 60 seconds         |                |                   |               |
| After sonication stir for           | 5 seconds          |                |                   |               |
| <b>Sample Dissolution</b>           |                    |                |                   |               |
| Perform a dissolution stage         | Yes                |                |                   |               |
| Adjust and hold pH for dissolution  | To start pH        |                |                   |               |
| Stir to dissolve for                | 120 seconds        |                |                   |               |
| For dissolution, stir at            | 10%                |                |                   |               |
| <b>Carbonate purge</b>              |                    |                |                   |               |
| Perform a carbonate purge           | No                 |                |                   |               |
| <b>Temperature Control</b>          |                    |                |                   |               |
| Wait for temperature                | Yes                |                |                   |               |
| Required start temperature          | 25.0°C             |                |                   |               |
| Acceptable deviation                | 0.5°C              |                |                   |               |
| Time to wait                        | 60 seconds         |                |                   |               |
| Stir speed of                       | 50%                |                |                   |               |
| <b>Titration 1</b>                  |                    |                |                   |               |
| Titrate from                        | Low to high pH     |                |                   |               |
| Adjust to start pH                  | Yes                |                |                   |               |
| After pH adjust stir for            | 30 seconds         |                |                   |               |
| Stir to allow partitioning for      | 15 seconds         |                |                   |               |
| Stirrer speed for partitioning      | 50%                |                |                   |               |
| <b>Titration 2</b>                  |                    |                |                   |               |
| Titrate from                        | Low to high pH     |                |                   |               |
| Add additional water                | 0.00 mL            |                |                   |               |
| Additional partition solvent volume | 0.200 mL           |                |                   |               |
| Additional partition solvent added  | Automatic          |                |                   |               |
| After pH adjust stir for            | 30 seconds         |                |                   |               |
| Stir to allow partitioning for      | 15 seconds         |                |                   |               |
| Stirrer speed for partitioning      | 55%                |                |                   |               |



Sample name: **M18\_octanol**  
 Assay name: **pH-metric high logP**  
 Assay ID: **18C-09014**  
 Filename: **C:\Sirius\_T3\Mehtap\20180309\_exp31\_logP\_T3-2\18C-09014\_M18\_octanol\_pH-metric high logP.t3r**

Experiment start time: **3/9/2018 8:37:21 PM**  
 Analyst: **Pion**  
 Instrument ID: **T312060**

## Assay Settings (continued)

| Setting                             | Value          | Original Value | Date/Time changed | Imported from |
|-------------------------------------|----------------|----------------|-------------------|---------------|
| <b>Titration 3</b>                  |                |                |                   |               |
| Titrate from                        | Low to high pH |                |                   |               |
| Add additional water                | 0.00 mL        |                |                   |               |
| Additional partition solvent volume | 0.500 mL       |                |                   |               |
| Additional partition solvent added  | Automatic      |                |                   |               |
| After pH adjust stir for            | 30 seconds     |                |                   |               |
| Stir to allow partitioning for      | 15 seconds     |                |                   |               |
| Stirrer speed for partitioning      | 60%            |                |                   |               |
| <b>Data Point Stability</b>         |                |                |                   |               |
| Stir during data point collection   | No             |                |                   |               |
| Delay before data point collection  | 0 seconds      |                |                   |               |
| Number of points to average         | 20 points      |                |                   |               |
| Time interval between points        | 0.50 seconds   |                |                   |               |
| Required maximum standard deviation | 0.00100 dpH/dt |                |                   |               |
| Stability timeout after             | 60 seconds     |                |                   |               |

## Calibration Settings

| Setting                   | Value  | Date/Time changed   | Imported from             |
|---------------------------|--------|---------------------|---------------------------|
| Four-Plus alpha           | 0.102  | 3/9/2018 8:37:21 PM | C:\Sirius_T3\HCl18C09.t3r |
| Four-Plus S               | 0.9967 | 3/9/2018 8:37:21 PM | C:\Sirius_T3\HCl18C09.t3r |
| Four-Plus jH              | 1.2    | 3/9/2018 8:37:21 PM | C:\Sirius_T3\HCl18C09.t3r |
| Four-Plus jOH             | 0.0    | 3/9/2018 8:37:21 PM | C:\Sirius_T3\HCl18C09.t3r |
| Base concentration factor | 1.000  | 3/9/2018 8:37:21 PM | C:\Sirius_T3\KOH18B27.t3r |
| Acid concentration factor | 1.000  | 3/9/2018 8:37:21 PM | C:\Sirius_T3\HCl18C09.t3r |

## Instrument Settings

| Setting              | Value                      | Batch Id    | Install date           |
|----------------------|----------------------------|-------------|------------------------|
| Instrument owner     | Merck                      |             |                        |
| Instrument ID        | T312060                    |             |                        |
| Instrument type      | T3 Simulator               |             |                        |
| Software version     | 1.1.3.0                    |             |                        |
| Dispenser module     |                            | T3DM1200361 | 3/31/2009 6:24:52 AM   |
| Dispenser 0          | Water                      |             | 3/31/2009 6:25:05 AM   |
| Syringe volume       | 2.5 mL                     |             |                        |
| Firmware version     | 1.2.1(r2)                  |             |                        |
| Titrant              | Water (0.15 M KCl)         | 02-06-2018  | 2/27/2018 11:05:59 AM  |
| Dispenser 2          | Acid                       |             | 3/31/2009 6:25:11 AM   |
| Syringe volume       | 0.5 mL                     |             |                        |
| Firmware version     | 1.2.1(r2)                  |             |                        |
| Titrant              | Acid (0.5 M HCl)           | 02-27-2018  | 2/27/2018 11:27:22 AM  |
| Dispenser 1          | Base                       |             | 3/31/2009 6:25:21 AM   |
| Syringe volume       | 0.5 mL                     |             |                        |
| Firmware version     | 1.2.1(r2)                  |             |                        |
| Titrant              | Base (0.5 M KOH)           | 9/22/2017   | 2/27/2018 11:21:22 AM  |
| Dispenser 5          | Cosolvent                  |             | 3/31/2009 6:26:24 AM   |
| Syringe volume       | 2.5 mL                     |             |                        |
| Firmware version     | 1.2.1(r2)                  |             |                        |
| Distribution valve 5 | Distribution Valve         |             | 3/31/2009 6:28:19 AM   |
| Firmware version     | 1.1.3                      |             |                        |
| Port A               | Methanol (80%, 0.15 M KCl) | 02-08-2018  | 3/6/2018 10:28:59 AM   |
| Port B               | Cyclohexane                | 11-01-17    | 2/27/2018 11:37:57 AM  |
| Dispenser 3          | Buffer                     |             | 8/3/2010 6:05:16 AM    |
| Syringe volume       | 0.5 mL                     |             |                        |
| Firmware version     | 1.2.1(r2)                  |             |                        |
| Titrant              | Dodecane                   | 2018/01/31  | 2/28/2018 11:18:04 AM  |
| Dispenser 6          | Octanol                    |             | 10/22/2010 11:52:43 AM |

Sample name: **M18\_octanol** Experiment start time: **3/9/2018 8:37:21 PM**  
 Assay name: **pH-metric high logP** Analyst: **Pion**  
 Assay ID: **18C-09014** Instrument ID: **T312060**  
 Filename: **C:\Sirius\_T3\Mehtap\20180309\_exp31\_logP\_T3-2\18C-09014\_M18\_octanol\_pH-metric high logP.t3r**

## Instrument Settings (continued)

| Setting                                   | Value                      | Batch Id    | Install date           |
|-------------------------------------------|----------------------------|-------------|------------------------|
| Syringe volume                            | 0.5 mL                     |             |                        |
| Firmware version                          | 1.2.1(r2)                  |             |                        |
| Titrant                                   | Octanol                    | 01-31-2018  | 2/27/2018 10:59:35 AM  |
| Titration                                 |                            | T3TM1200161 | 3/31/2009 6:24:17 AM   |
| Horizontal axis firmware version          | 1.17 AI1DI2DO2 Stepper 2   |             |                        |
| Vertical axis firmware version            | 1.17 AI1DI2DO2 Stepper 2   |             |                        |
| Chassis I/O firmware version              | 1.11 AI1DI0DO4 Norgren I/O |             |                        |
| Probe I/O firmware version                | 1.1.1                      |             |                        |
| Electrode                                 | T3 Electrode               | T3E0923     | 1/23/2018 3:01:00 PM   |
| E0 calibration                            | +5.00 mV                   |             | 3/9/2018 8:37:49 PM    |
| Filling solution                          | 3M KCl                     | KCL097      | 3/9/2018 11:05:42 AM   |
| Liquids                                   |                            |             |                        |
| Wash 1                                    | 50% IPA:50% Water          |             | 3/9/2018 11:04:22 AM   |
| Wash 2                                    | 0.5% Triton X-100 in H2O   |             | 3/9/2018 11:04:25 AM   |
| Buffer position 1                         | pH7 Wash                   |             | 3/9/2018 11:04:27 AM   |
| Buffer position 2                         | pH 7                       |             | 3/9/2018 11:04:30 AM   |
| Storage position                          |                            |             | 3/9/2018 11:05:04 AM   |
| Wash water                                | 5.1e+003 mL                | 02-27-2018  | 2/27/2018 10:54:39 AM  |
| Waste                                     | 1e+004 mL                  |             | 11/28/2017 11:36:29 AM |
| Temperature controller                    |                            |             | 8/5/2010 7:35:13 AM    |
| Turbidity detector                        |                            |             | 3/31/2009 6:24:45 AM   |
| Spectrometer                              |                            | 074811      | 11/23/2010 12:22:28 PM |
| Dip probe                                 |                            | 10196       |                        |
| Wavelength coefficient A0                 | 183.333                    |             |                        |
| Wavelength coefficient A1                 | 2.21568                    |             |                        |
| Wavelength coefficient A2                 | -0.000289308               |             |                        |
| Total lamp lit time                       | 123:16:41                  |             | 11/23/2010 12:22:28 PM |
| Calibrated on                             | 2/27/2018 11:40:38 AM      |             |                        |
| Integration time                          | 40                         |             |                        |
| Scans averaged                            | 10                         |             |                        |
| Autoloader                                |                            | T3AL1200345 | 11/10/2015 10:34:13 AM |
| Left-right axis firmware version          | 1.17 AI1DI2DO2 Stepper 2   |             |                        |
| Front-back axis firmware version          | 1.17 AI1DI2DO2 Stepper 2   |             |                        |
| Vertical axis firmware version            | 1.17 AI1DI2DO2 Stepper 2   |             |                        |
| Chassis I/O firmware version              | 1.11 AI1DI0DO4 Norgren I/O |             |                        |
| Configuration                             |                            |             |                        |
| Alternate titration position              | Titration position         |             |                        |
| Alternate reference position              | Reference position         |             |                        |
| Maximum standard vial volume              | 3.50 mL                    |             |                        |
| Maximum alternate vial volume             | 25.00 mL                   |             |                        |
| Automatic action idle period              | 5 minute(s)                |             |                        |
| Titration tube volume                     | 1.3 mL                     |             |                        |
| Syringe flush count                       | 3.50                       |             |                        |
| Flowing wash pump volume                  | 20.0 mL                    |             |                        |
| Flowing wash stir duration                | 5 s                        |             |                        |
| Flowing wash stir speed                   | 30%                        |             |                        |
| Solvent wash stir duration                | 5 s                        |             |                        |
| Solvent wash stir speed                   | 30%                        |             |                        |
| Surfactant wash stir duration             | 5 s                        |             |                        |
| Surfactant wash stir speed                | 30%                        |             |                        |
| E0 calibration minimum number of points   | 10                         |             |                        |
| E0 calibration maximum standard deviation | 0.01500                    |             |                        |
| E0 calibration timeout period             | 60 s                       |             |                        |
| E0 calibration stir duration              | 5 s                        |             |                        |
| E0 calibration preparation stir speed     | 30%                        |             |                        |
| E0 calibration buffer wash stir duration  | 5 s                        |             |                        |
| E0 calibration buffer wash stir speed     | 30%                        |             |                        |
| E0 calibration reading stir speed         | 0%                         |             |                        |

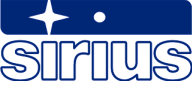

## Assay Settings

Sample name: **M18\_octanol** Experiment start time: **3/9/2018 8:37:21 PM**  
Assay name: **pH-metric high logP** Analyst: **Pion**  
Assay ID: **18C-09014** Instrument ID: **T312060**  
Filename: **C:\Sirius\_T3\Mehtap\20180309\_exp31\_logP\_T3-2\18C-09014\_M18\_octanol\_pH-metric high logP.t3r**

### Instrument Settings (continued)

| Setting                                     | Value   | Batch Id | Install date |
|---------------------------------------------|---------|----------|--------------|
| Spectrometer calibration stir duration      | 5 s     |          |              |
| Spectrometer calibration stir speed         | 30%     |          |              |
| Spectrometer calibration wash pump volume   | 20.0 mL |          |              |
| Spectrometer calibration wash stir duration | 5 s     |          |              |
| Spectrometer calibration wash stir speed    | 30%     |          |              |
| Overhead dispense height                    | 10000   |          |              |

### Refinement Settings

| Setting                        | Value    | Default value |
|--------------------------------|----------|---------------|
| Turbidity detection method     | None     | None          |
| Turbidity wavelength to assess | 500.0 nm | 500.0 nm      |
| Turbidity maximum absorbance   | 0.100    | 0.100         |
| Turbidity probe threshold      | 50.00    | 50.00         |
