# Supplementary material for: Octanol-water partition coefficient measurements for the SAMPL6 Blind Prediction Challenge
Source: bioRxiv or medRxiv preprint supplement (doi:10.1101/757393), 2019-12-02
Supplement: Supplementary file [file media-2.zip]

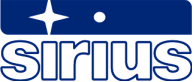

Sample name: **M15\_octanol**  
Assay name: **pH-metric high logP**  
Assay ID: **18C-01004**  
Filename: **C:\Sirius\_T3\Mehtap\20180228\_exp28\_logP\_T3-2\18C-01004\_M15\_octanol\_pH-metric high logP.t3r**

Experiment start time: **3/1/2018 4:33:50 AM**  
Analyst: **Pion**  
Instrument ID: **T312060**

## pH-metric Result

logP (XH2 2+) -5.50  
logP (XH +) -0.11 ±0.20 (n=50)  
logP (neutral X) 1.92 ±0.01 (n=50)

### 18C-01004 Points 1 to 36

M15\_octanol concentration factor 0.910  
Carbonate 0.2391 mM  
Acidity error -0.31186 mM

### 18C-01004 Points 37 to 69

M15\_octanol concentration factor 0.903  
Carbonate 0.1847 mM  
Acidity error -0.25845 mM

### 18C-01004 Points 70 to 106

M15\_octanol concentration factor 0.913  
Carbonate 0.0779 mM  
Acidity error -0.09188 mM

## Warnings and errors

Errors None  
Warnings One or more logP values out of range

## Sample logD and percent species

| pH     | M15_octanol<br>logD | M15_octanol<br>M15_octanolH2 | M15_octanol<br>M15_octanolH | M15_octanol<br>M15_octanol | M15_octanol<br>M15_octanolH2* | M15_octanol<br>M15_octanolH* | M15_octanol<br>M15_octanol* | Comment       |
|--------|---------------------|------------------------------|-----------------------------|----------------------------|-------------------------------|------------------------------|-----------------------------|---------------|
| 1.000  | -1.70               | 95.54 %                      | 2.51 %                      | 0.00 %                     | 0.00 %                        | 1.94 %                       | 0.01 %                      | Stomach<br>pH |
| 1.200  | -1.51               | 93.10 %                      | 3.88 %                      | 0.00 %                     | 0.00 %                        | 3.00 %                       | 0.03 %                      |               |
| 2.000  | -0.77               | 67.69 %                      | 17.81 %                     | 0.01 %                     | 0.00 %                        | 13.75 %                      | 0.74 %                      |               |
| 3.000  | -0.07               | 14.76 %                      | 38.83 %                     | 0.19 %                     | 0.00 %                        | 29.98 %                      | 16.23 %                     | Blood pH      |
| 4.000  | 0.66                | 0.63 %                       | 16.56 %                     | 0.83 %                     | 0.00 %                        | 12.79 %                      | 69.20 %                     |               |
| 5.000  | 1.45                | 0.01 %                       | 2.27 %                      | 1.14 %                     | 0.00 %                        | 1.75 %                       | 94.83 %                     |               |
| 6.000  | 1.84                | 0.00 %                       | 0.24 %                      | 1.18 %                     | 0.00 %                        | 0.18 %                       | 98.40 %                     |               |
| 6.500  | 1.89                | 0.00 %                       | 0.07 %                      | 1.18 %                     | 0.00 %                        | 0.06 %                       | 98.68 %                     |               |
| 7.000  | 1.91                | 0.00 %                       | 0.02 %                      | 1.18 %                     | 0.00 %                        | 0.02 %                       | 98.77 %                     |               |
| 7.400  | 1.92                | 0.00 %                       | 0.01 %                      | 1.18 %                     | 0.00 %                        | 0.01 %                       | 98.80 %                     |               |
| 8.000  | 1.92                | 0.00 %                       | 0.00 %                      | 1.19 %                     | 0.00 %                        | 0.00 %                       | 98.81 %                     |               |
| 9.000  | 1.92                | 0.00 %                       | 0.00 %                      | 1.19 %                     | 0.00 %                        | 0.00 %                       | 98.81 %                     |               |
| 10.000 | 1.92                | 0.00 %                       | 0.00 %                      | 1.19 %                     | 0.00 %                        | 0.00 %                       | 98.81 %                     |               |
| 11.000 | 1.92                | 0.00 %                       | 0.00 %                      | 1.19 %                     | 0.00 %                        | 0.00 %                       | 98.81 %                     |               |
| 12.000 | 1.92                | 0.00 %                       | 0.00 %                      | 1.19 %                     | 0.00 %                        | 0.00 %                       | 98.81 %                     |               |

Sample name: **M15\_octanol**  
 Assay name: **pH-metric high logP**  
 Assay ID: **18C-01004**  
 Filename: **C:\Sirius\_T3\Mehtap\20180228\_exp28\_logP\_T3-2\18C-01004\_M15\_octanol\_pH-metric high logP.t3r**

Experiment start time: **3/1/2018 4:33:50 AM**  
 Analyst: **Pion**  
 Instrument ID: **T312060**

## Graphs

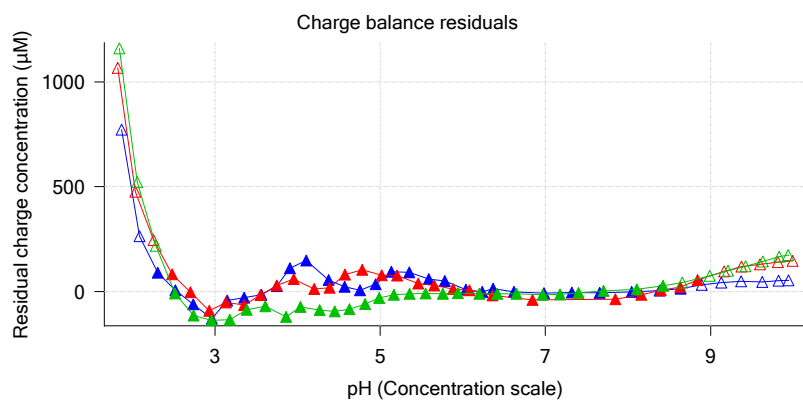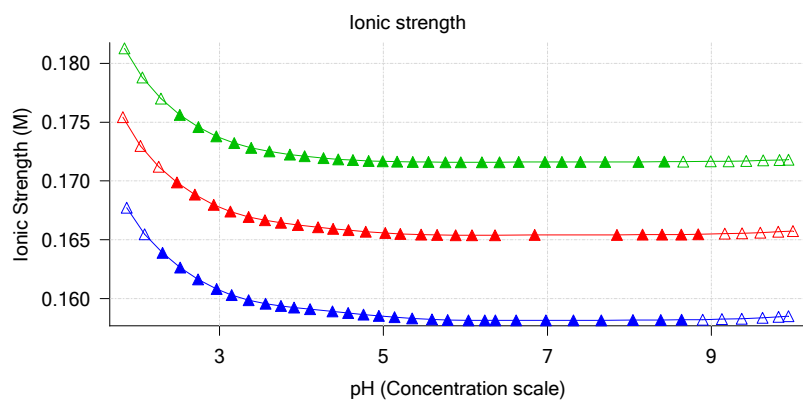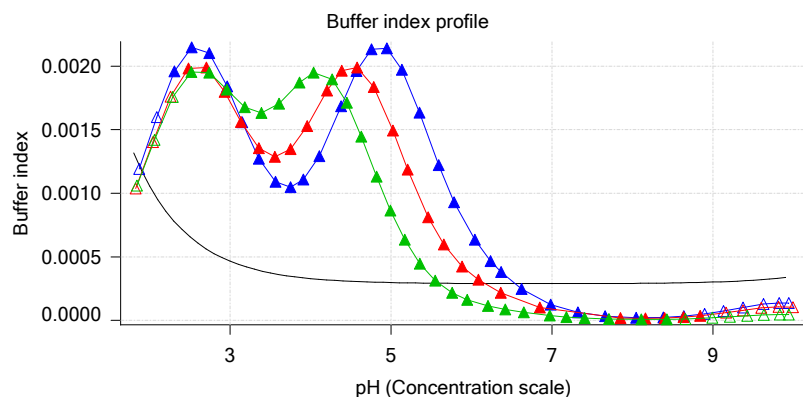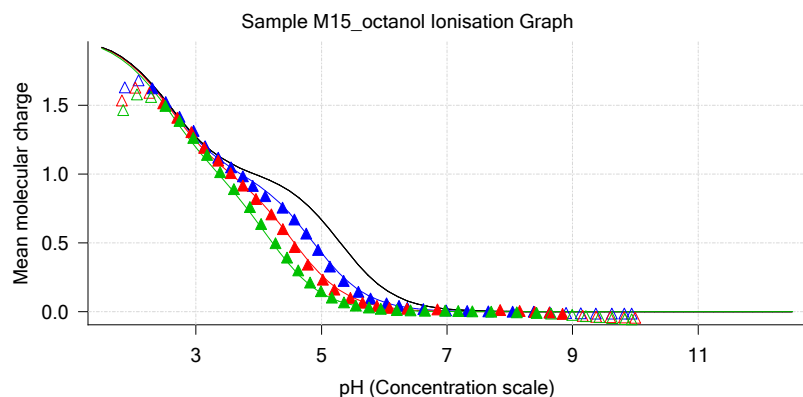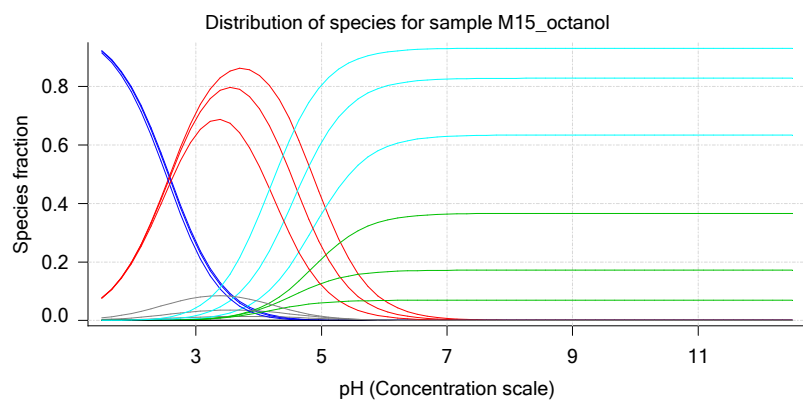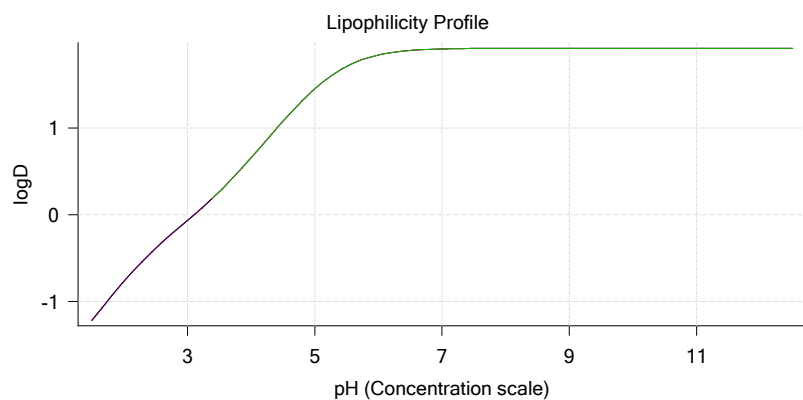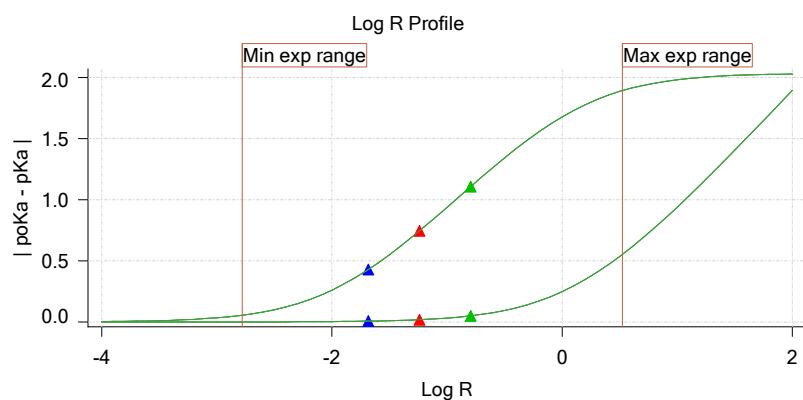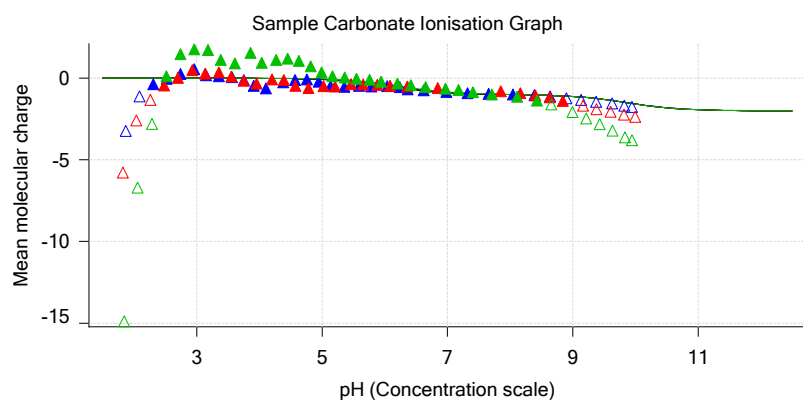

Sample name: **M15\_octanol**  
 Assay name: **pH-metric high logP**  
 Assay ID: **18C-01004**  
 Filename: **C:\Sirius\_T3\Mehtap\20180228\_exp28\_logP\_T3-2\18C-01004\_M15\_octanol\_pH-metric high logP.t3r**

Experiment start time: **3/1/2018 4:33:50 AM**  
 Analyst: **Pion**  
 Instrument ID: **T312060**

## Graphs (continued)

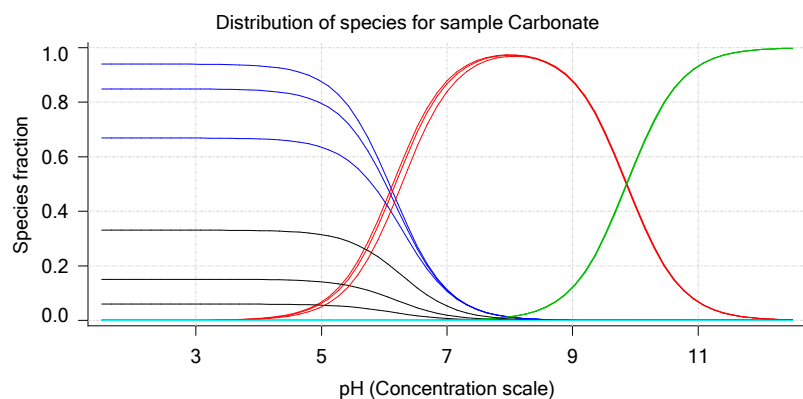

Sample name: **M15\_octanol**  
 Assay name: **pH-metric high logP**  
 Assay ID: **18C-01004**  
 Filename: **C:\Sirius\_T3\Mehtap\20180228\_exp28\_logP\_T3-2\18C-01004\_M15\_octanol\_pH-metric high logP.t3r**

Experiment start time: **3/1/2018 4:33:50 AM**  
 Analyst: **Pion**  
 Instrument ID: **T312060**

## pH-metric high logP Titration 1 of 3 18C-01004 Points 1 to 36

### Overall results

RMSD 0.075  
 Average ionic strength 0.159 M  
 Average temperature 25.0°C  
 Partition ratio 0.0208 : 1  
 Analyte concentration range 3893.3 µM to 4047.6 µM  
 Total points considered 28 of 36

### Warnings and errors

Errors None  
 Warnings One or more logP values out of range

### Four-Plus parameters

Alpha 0.130 3/1/2018 4:33:50 AM C:\Sirius\_T3\HCl18B27.t3r  
 S 0.9970 3/1/2018 4:33:50 AM C:\Sirius\_T3\HCl18B27.t3r  
 jH 0.8 3/1/2018 4:33:50 AM C:\Sirius\_T3\HCl18B27.t3r  
 jOH -0.4 3/1/2018 4:33:50 AM C:\Sirius\_T3\HCl18B27.t3r

### Titrants

0.50 M HCl 0.993513 3/1/2018 4:33:50 AM C:\Sirius\_T3\HCl18B27.t3r  
 0.50 M KOH 0.999845 3/1/2018 4:33:50 AM C:\Sirius\_T3\KOH18B27.t3r

### Sample

M15\_octanol concentration factor 0.910  
 Base pKa 1 2.58  
 Base pKa 2 5.30  
 logP (XH2 2+) -5.50  
 logP (XH +) -4.16  
 logP (neutral X) 1.96

### Sample graphs

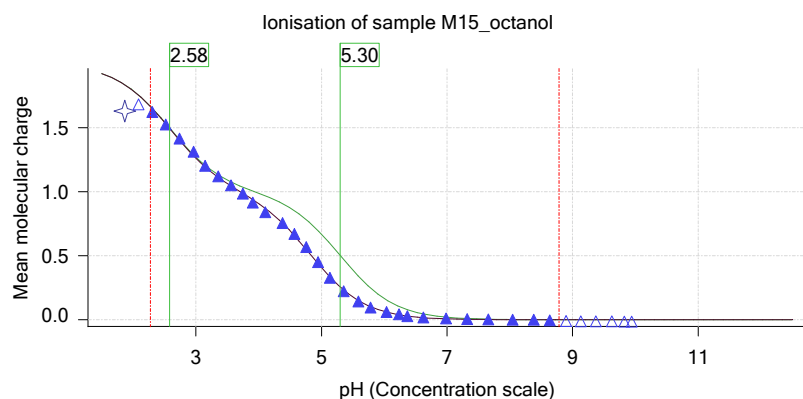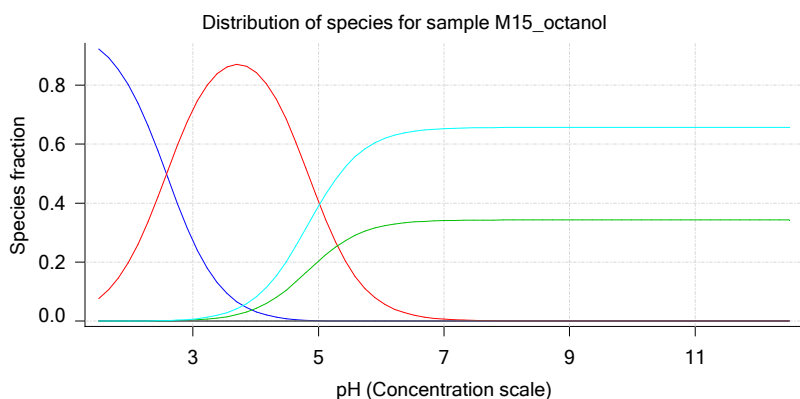

Sample name: **M15\_octanol**  
 Assay name: **pH-metric high logP**  
 Assay ID: **18C-01004**  
 Filename: **C:\Sirius\_T3\Mehtap\20180228\_exp28\_logP\_T3-2\18C-01004\_M15\_octanol\_pH-metric high logP.t3r**

Experiment start time: **3/1/2018 4:33:50 AM**  
 Analyst: **Pion**  
 Instrument ID: **T312060**

## Sample graphs (continued)

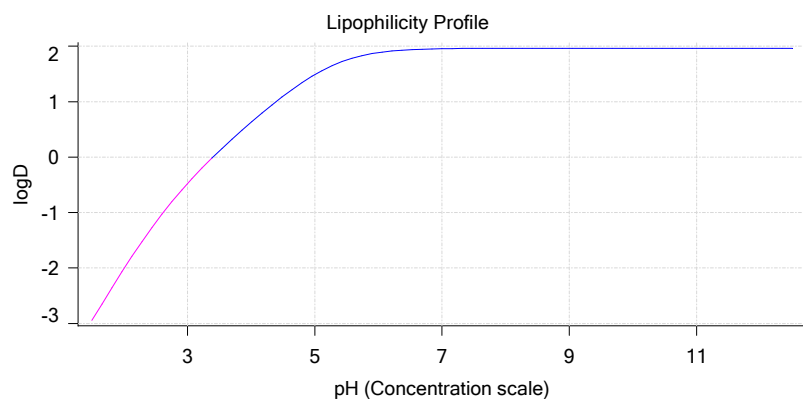

## Sample logD and percent species

| pH     | M15_octanol<br>logD | M15_octanol<br>M15_octanolH2 | M15_octanol<br>M15_octanolH | M15_octanol<br>M15_octanol | M15_octanol<br>M15_octanolH2* | M15_octanol<br>M15_octanolH* | M15_octanol<br>M15_octanol* | Comment       |
|--------|---------------------|------------------------------|-----------------------------|----------------------------|-------------------------------|------------------------------|-----------------------------|---------------|
| 1.000  | -3.91               | 97.44 %                      | 2.56 %                      | 0.00 %                     | 0.00 %                        | 0.00 %                       | 0.00 %                      | Stomach<br>pH |
| 1.200  | -3.52               | 96.00 %                      | 4.00 %                      | 0.00 %                     | 0.00 %                        | 0.00 %                       | 0.00 %                      |               |
| 2.000  | -2.02               | 79.15 %                      | 20.82 %                     | 0.01 %                     | 0.00 %                        | 0.00 %                       | 0.02 %                      |               |
| 3.000  | -0.48               | 27.26 %                      | 71.69 %                     | 0.36 %                     | 0.00 %                        | 0.00 %                       | 0.69 %                      |               |
| 4.000  | 0.63                | 3.21 %                       | 84.45 %                     | 4.23 %                     | 0.00 %                        | 0.00 %                       | 8.10 %                      | Blood<br>pH   |
| 5.000  | 1.49                | 0.15 %                       | 40.58 %                     | 20.34 %                    | 0.00 %                        | 0.00 %                       | 38.93 %                     |               |
| 6.000  | 1.89                | 0.00 %                       | 6.41 %                      | 32.11 %                    | 0.00 %                        | 0.00 %                       | 61.48 %                     |               |
| 6.500  | 1.94                | 0.00 %                       | 2.12 %                      | 33.58 %                    | 0.00 %                        | 0.00 %                       | 64.30 %                     |               |
| 7.000  | 1.96                | 0.00 %                       | 0.68 %                      | 34.08 %                    | 0.00 %                        | 0.00 %                       | 65.24 %                     |               |
| 7.400  | 1.96                | 0.00 %                       | 0.27 %                      | 34.22 %                    | 0.00 %                        | 0.00 %                       | 65.51 %                     |               |
| 8.000  | 1.96                | 0.00 %                       | 0.07 %                      | 34.29 %                    | 0.00 %                        | 0.00 %                       | 65.64 %                     |               |
| 9.000  | 1.96                | 0.00 %                       | 0.01 %                      | 34.31 %                    | 0.00 %                        | 0.00 %                       | 65.68 %                     |               |
| 10.000 | 1.96                | 0.00 %                       | 0.00 %                      | 34.31 %                    | 0.00 %                        | 0.00 %                       | 65.69 %                     |               |
| 11.000 | 1.96                | 0.00 %                       | 0.00 %                      | 34.31 %                    | 0.00 %                        | 0.00 %                       | 65.69 %                     |               |
| 12.000 | 1.96                | 0.00 %                       | 0.00 %                      | 34.31 %                    | 0.00 %                        | 0.00 %                       | 65.69 %                     |               |

## Carbonate and acidity

Carbonate 0.239 mM  
 Acidity error -0.312 mM

## Other graphs

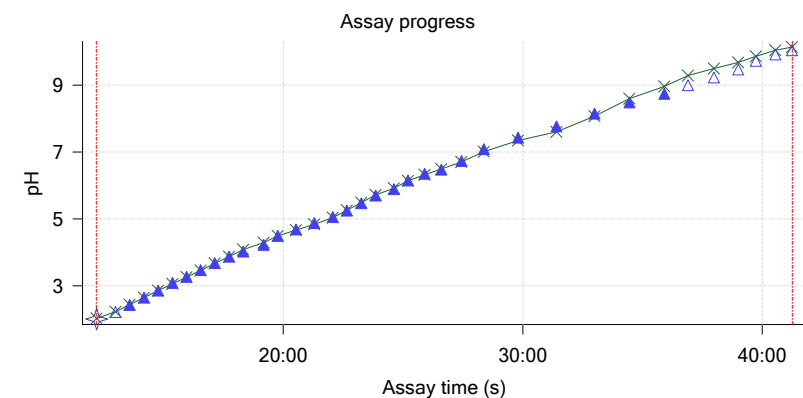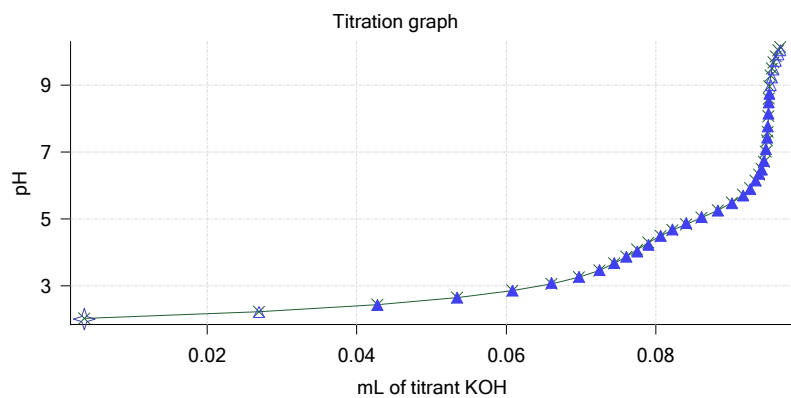

Sample name: **M15\_octanol**  
 Assay name: **pH-metric high logP**  
 Assay ID: **18C-01004**  
 Filename: **C:\Sirius\_T3\Mehtap\20180228\_exp28\_logP\_T3-2\18C-01004\_M15\_octanol\_pH-metric high logP.t3r**

Experiment start time: **3/1/2018 4:33:50 AM**  
 Analyst: **Pion**  
 Instrument ID: **T312060**

## Other graphs (continued)

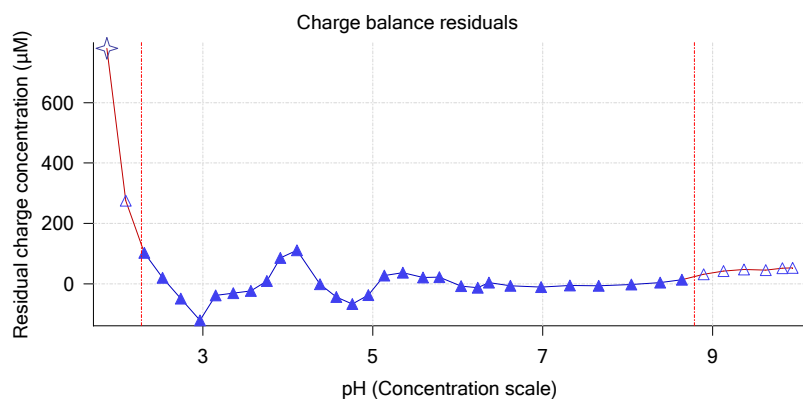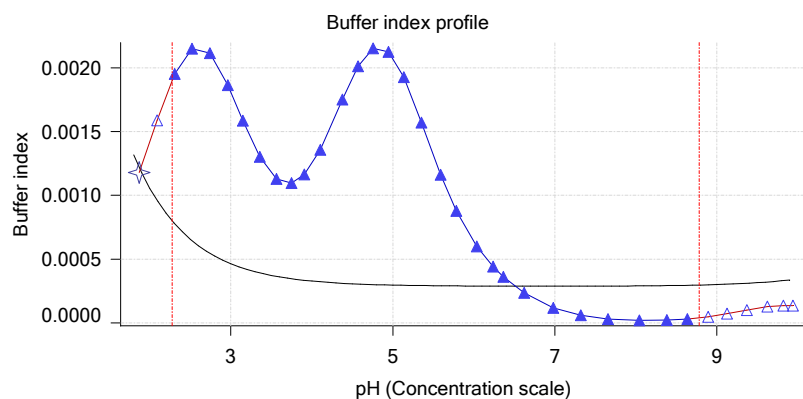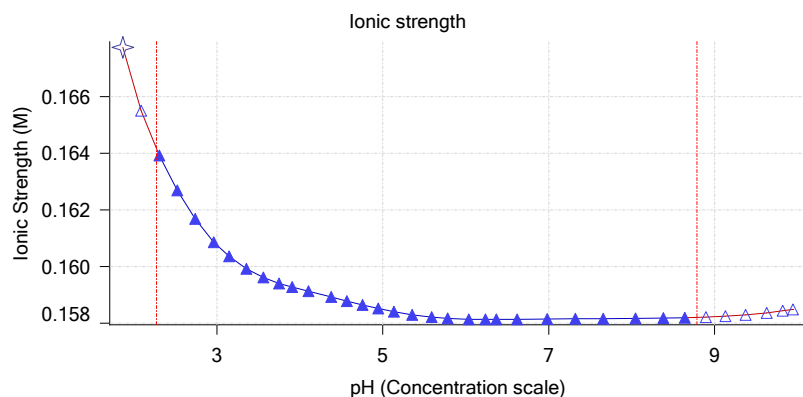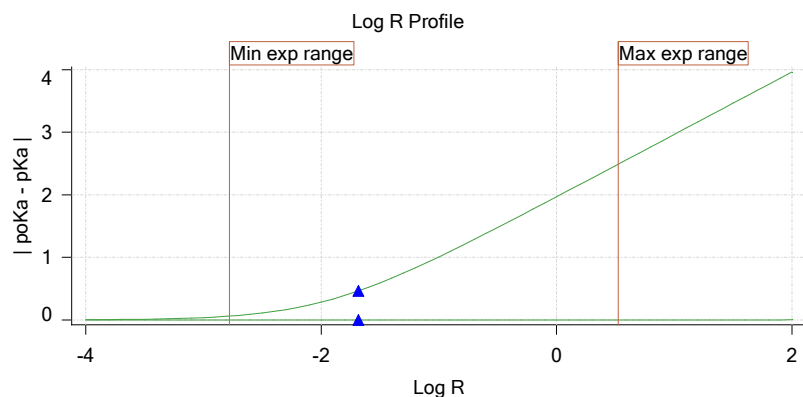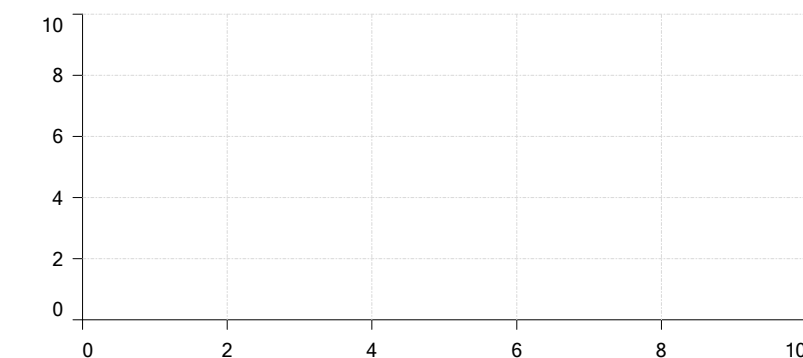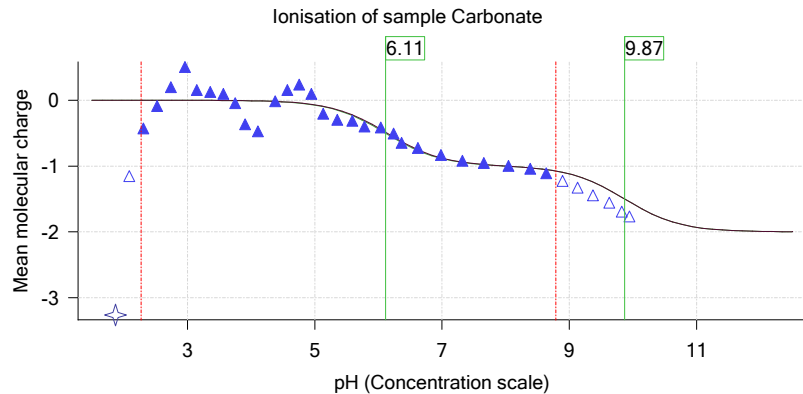

Sample name: **M15\_octanol**  
 Assay name: **pH-metric high logP**  
 Assay ID: **18C-01004**  
 Filename: **C:\Sirius\_T3\Mehtap\20180228\_exp28\_logP\_T3-2\18C-01004\_M15\_octanol\_pH-metric high logP.t3r**

Experiment start time: **3/1/2018 4:33:50 AM**  
 Analyst: **Pion**  
 Instrument ID: **T312060**

## pH-metric high logP Titration 2 of 3 18C-01004 Points 37 to 69

### Overall results

RMSD 0.470  
 Average ionic strength 0.166 M  
 Average temperature 25.0°C  
 Partition ratio 0.0577 : 1  
 Analyte concentration range 3455.8 µM to 3592.3 µM  
 Total points considered 25 of 33

### Warnings and errors

Errors None  
 Warnings One or more logP values out of range

### Four-Plus parameters

Alpha 0.130 3/1/2018 4:33:50 AM C:\Sirius\_T3\HCl18B27.t3r  
 S 0.9970 3/1/2018 4:33:50 AM C:\Sirius\_T3\HCl18B27.t3r  
 jH 0.8 3/1/2018 4:33:50 AM C:\Sirius\_T3\HCl18B27.t3r  
 jOH -0.4 3/1/2018 4:33:50 AM C:\Sirius\_T3\HCl18B27.t3r

### Titrants

0.50 M HCl 0.993513 3/1/2018 4:33:50 AM C:\Sirius\_T3\HCl18B27.t3r  
 0.50 M KOH 0.999845 3/1/2018 4:33:50 AM C:\Sirius\_T3\KOH18B27.t3r

### Sample

M15\_octanol concentration factor 0.903  
 Base pKa 1 2.58  
 Base pKa 2 5.30  
 logP (XH2 2+) -5.50  
 logP (XH +) -3.58  
 logP (neutral X) 1.94

### Sample graphs

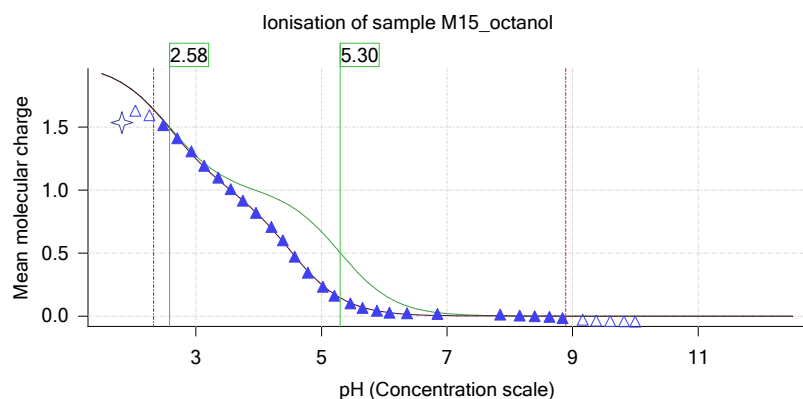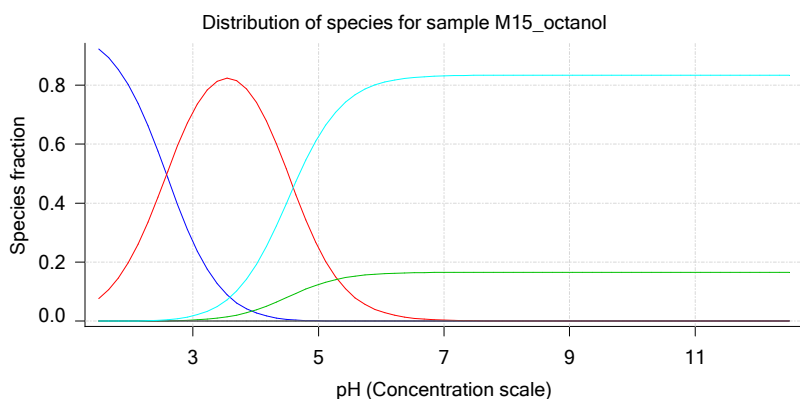

Sample name: **M15\_octanol**  
 Assay name: **pH-metric high logP**  
 Assay ID: **18C-01004**  
 Filename: **C:\Sirius\_T3\Mehtap\20180228\_exp28\_logP\_T3-2\18C-01004\_M15\_octanol\_pH-metric high logP.t3r**

Experiment start time: **3/1/2018 4:33:50 AM**  
 Analyst: **Pion**  
 Instrument ID: **T312060**

## Sample graphs (continued)

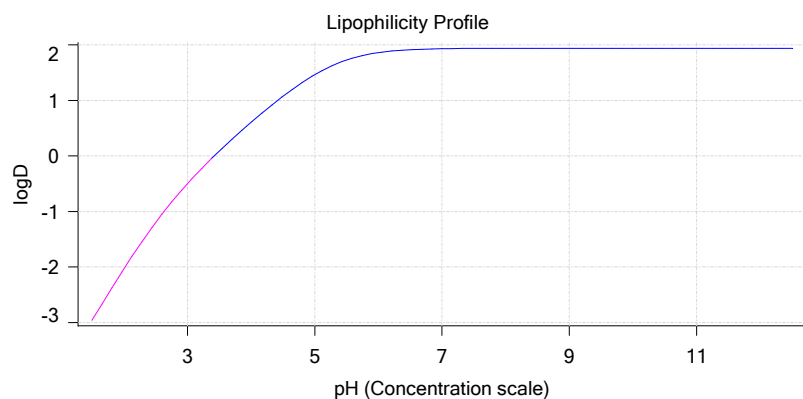

## Sample logD and percent species

| pH     | M15_octanol<br>logD | M15_octanol<br>M15_octanolH2 | M15_octanol<br>M15_octanolH | M15_octanol<br>M15_octanol | M15_octanol<br>M15_octanolH2* | M15_octanol<br>M15_octanolH* | M15_octanol<br>M15_octanol* | Comment       |
|--------|---------------------|------------------------------|-----------------------------|----------------------------|-------------------------------|------------------------------|-----------------------------|---------------|
| 1.000  | -3.91               | 97.44 %                      | 2.56 %                      | 0.00 %                     | 0.00 %                        | 0.00 %                       | 0.00 %                      | Stomach<br>pH |
| 1.200  | -3.54               | 96.00 %                      | 4.00 %                      | 0.00 %                     | 0.00 %                        | 0.00 %                       | 0.00 %                      |               |
| 2.000  | -2.04               | 79.12 %                      | 20.81 %                     | 0.01 %                     | 0.00 %                        | 0.00 %                       | 0.05 %                      |               |
| 3.000  | -0.50               | 26.96 %                      | 70.90 %                     | 0.36 %                     | 0.00 %                        | 0.00 %                       | 1.79 %                      | Blood pH      |
| 4.000  | 0.60                | 2.84 %                       | 74.62 %                     | 3.74 %                     | 0.00 %                        | 0.00 %                       | 18.80 %                     |               |
| 5.000  | 1.46                | 0.09 %                       | 24.85 %                     | 12.46 %                    | 0.00 %                        | 0.00 %                       | 62.60 %                     |               |
| 6.000  | 1.86                | 0.00 %                       | 3.20 %                      | 16.06 %                    | 0.00 %                        | 0.00 %                       | 80.73 %                     |               |
| 6.500  | 1.91                | 0.00 %                       | 1.04 %                      | 16.42 %                    | 0.00 %                        | 0.00 %                       | 82.54 %                     |               |
| 7.000  | 1.93                | 0.00 %                       | 0.33 %                      | 16.54 %                    | 0.00 %                        | 0.00 %                       | 83.13 %                     |               |
| 7.400  | 1.94                | 0.00 %                       | 0.13 %                      | 16.57 %                    | 0.00 %                        | 0.00 %                       | 83.30 %                     |               |
| 8.000  | 1.94                | 0.00 %                       | 0.03 %                      | 16.59 %                    | 0.00 %                        | 0.00 %                       | 83.38 %                     |               |
| 9.000  | 1.94                | 0.00 %                       | 0.00 %                      | 16.59 %                    | 0.00 %                        | 0.00 %                       | 83.40 %                     |               |
| 10.000 | 1.94                | 0.00 %                       | 0.00 %                      | 16.60 %                    | 0.00 %                        | 0.00 %                       | 83.40 %                     |               |
| 11.000 | 1.94                | 0.00 %                       | 0.00 %                      | 16.60 %                    | 0.00 %                        | 0.00 %                       | 83.40 %                     |               |
| 12.000 | 1.94                | 0.00 %                       | 0.00 %                      | 16.60 %                    | 0.00 %                        | 0.00 %                       | 83.40 %                     |               |

## Carbonate and acidity

Carbonate 0.185 mM  
 Acidity error -0.258 mM

## Other graphs

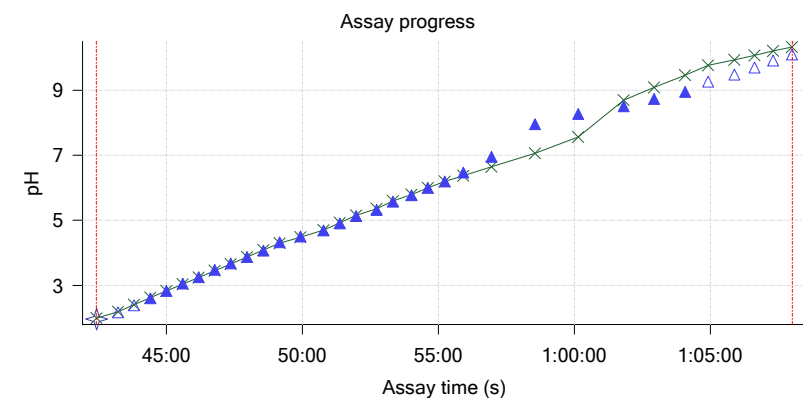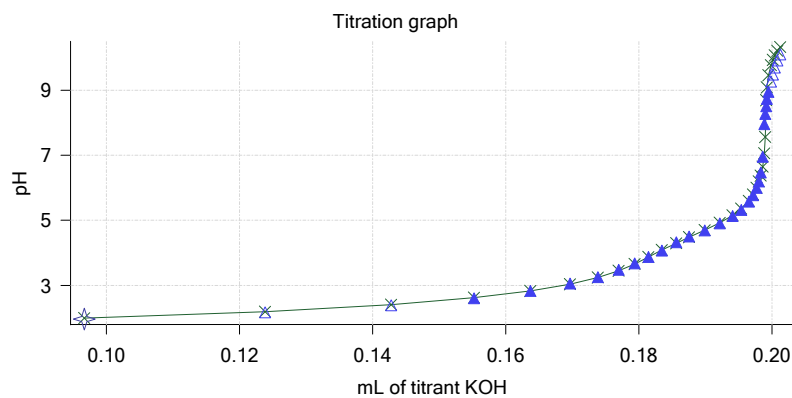



Sample name: **M15\_octanol**  
 Assay name: **pH-metric high logP**  
 Assay ID: **18C-01004**  
 Filename: **C:\Sirius\_T3\Mehtap\20180228\_exp28\_logP\_T3-2\18C-01004\_M15\_octanol\_pH-metric high logP.t3r**

Experiment start time: **3/1/2018 4:33:50 AM**  
 Analyst: **Pion**  
 Instrument ID: **T312060**

## Other graphs (continued)

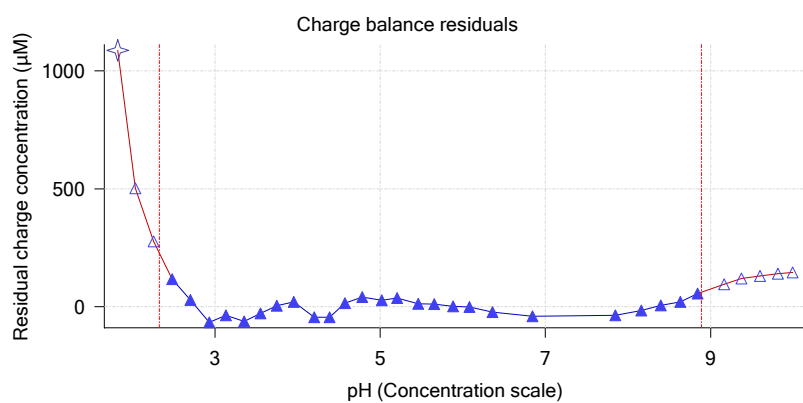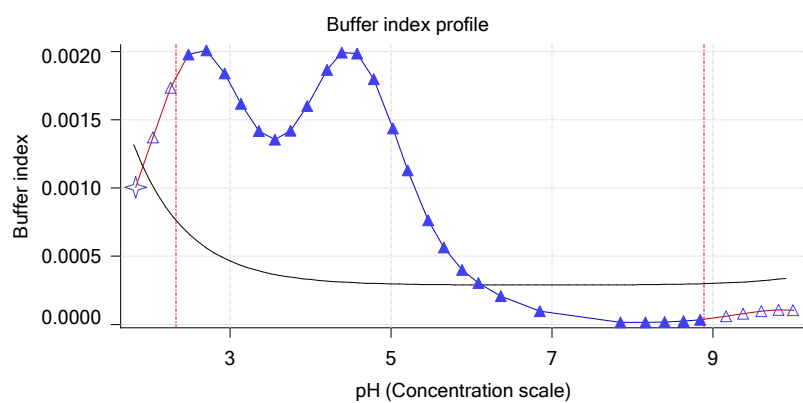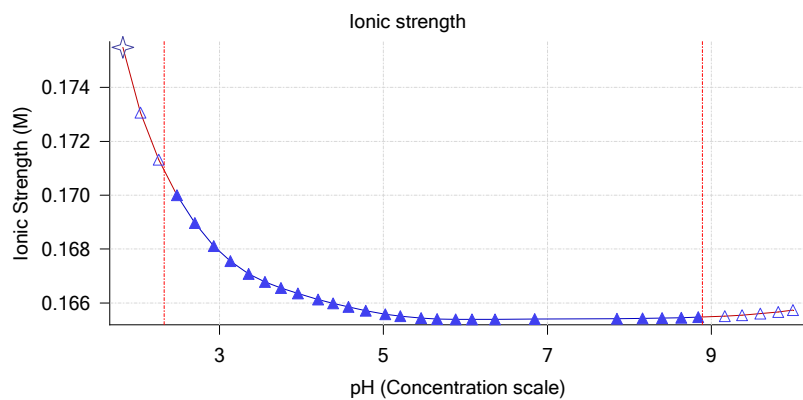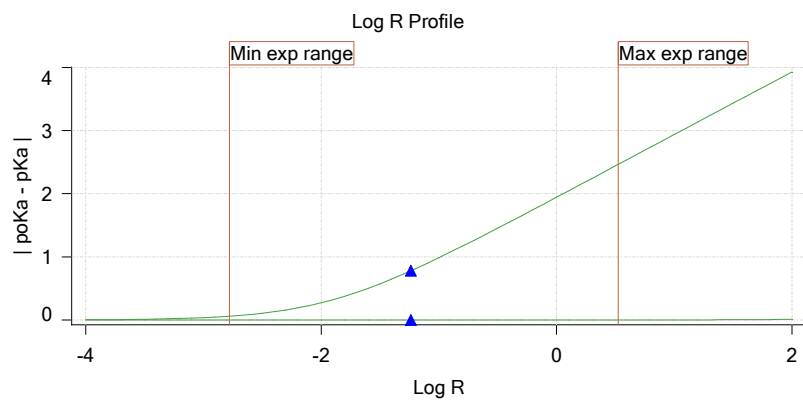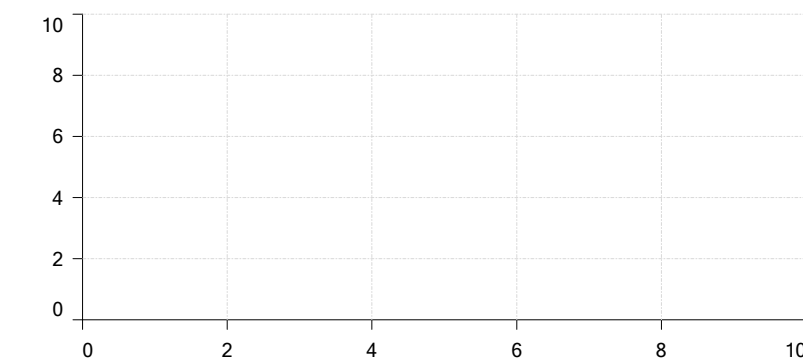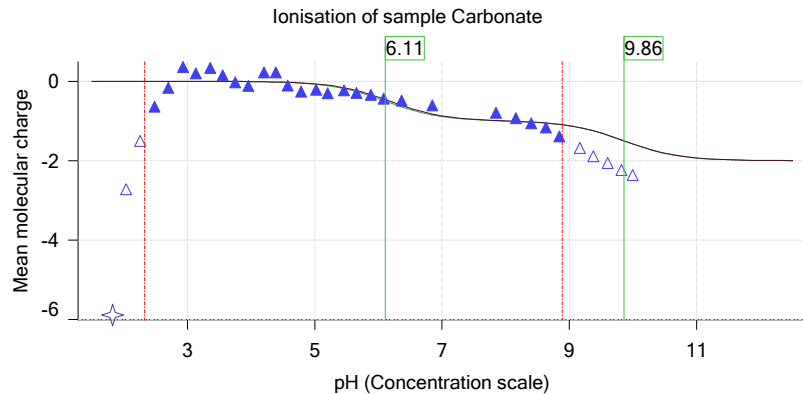

Sample name: **M15\_octanol**  
 Assay name: **pH-metric high logP**  
 Assay ID: **18C-01004**  
 Filename: **C:\Sirius\_T3\Mehtap\20180228\_exp28\_logP\_T3-2\18C-01004\_M15\_octanol\_pH-metric high logP.t3r**

Experiment start time: **3/1/2018 4:33:50 AM**  
 Analyst: **Pion**  
 Instrument ID: **T312060**

pH-metric high logP Titration 3 of 3 18C-01004 Points 70 to 106

## Overall results

RMSD 0.356  
 Average ionic strength 0.172 M  
 Average temperature 25.0°C  
 Partition ratio 0.1602 : 1  
 Analyte concentration range 2913.6 µM to 3011.2 µM  
 Total points considered 27 of 37

## Warnings and errors

Errors None  
 Warnings One or more logP values out of range

## Four-Plus parameters

Alpha 0.130 3/1/2018 4:33:50 AM C:\Sirius\_T3\HCl18B27.t3r  
 S 0.9970 3/1/2018 4:33:50 AM C:\Sirius\_T3\HCl18B27.t3r  
 jH 0.8 3/1/2018 4:33:50 AM C:\Sirius\_T3\HCl18B27.t3r  
 jOH -0.4 3/1/2018 4:33:50 AM C:\Sirius\_T3\HCl18B27.t3r

## Titrants

0.50 M HCl 0.993513 3/1/2018 4:33:50 AM C:\Sirius\_T3\HCl18B27.t3r  
 0.50 M KOH 0.999845 3/1/2018 4:33:50 AM C:\Sirius\_T3\KOH18B27.t3r

## Sample

M15\_octanol concentration factor 0.913  
 Base pKa 1 2.58  
 Base pKa 2 5.30  
 logP (XH2 2+) -5.50  
 logP (XH +) -1.60  
 logP (neutral X) 1.81

## Sample graphs

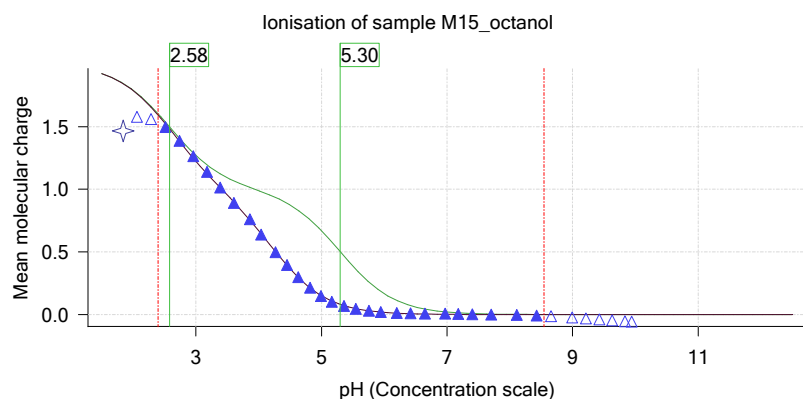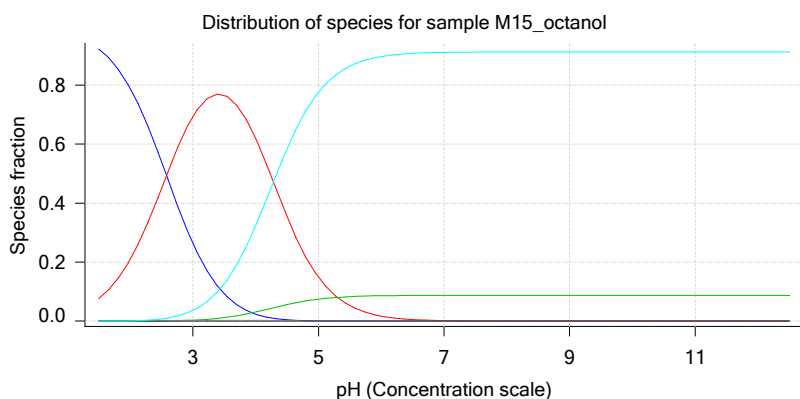

Sample name: **M15\_octanol**  
 Assay name: **pH-metric high logP**  
 Assay ID: **18C-01004**  
 Filename: **C:\Sirius\_T3\Mehtap\20180228\_exp28\_logP\_T3-2\18C-01004\_M15\_octanol\_pH-metric high logP.t3r**

Experiment start time: **3/1/2018 4:33:50 AM**  
 Analyst: **Pion**  
 Instrument ID: **T312060**

## Sample graphs (continued)

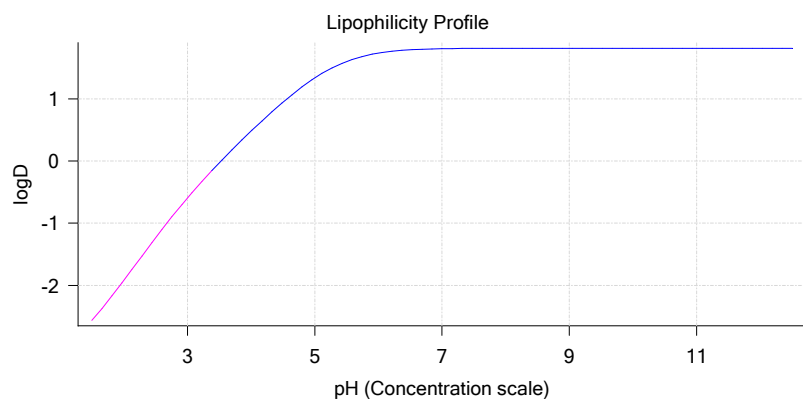

## Sample logD and percent species

| pH     | M15_octanol<br>logD | M15_octanol<br>M15_octanolH2 | M15_octanol<br>M15_octanolH | M15_octanol<br>M15_octanol | M15_octanol<br>M15_octanolH2* | M15_octanol<br>M15_octanolH* | M15_octanol<br>M15_octanol* | Comment       |
|--------|---------------------|------------------------------|-----------------------------|----------------------------|-------------------------------|------------------------------|-----------------------------|---------------|
| 1.000  | -3.13               | 97.43 %                      | 2.56 %                      | 0.00 %                     | 0.00 %                        | 0.01 %                       | 0.00 %                      | Stomach<br>pH |
| 1.200  | -2.91               | 95.98 %                      | 4.00 %                      | 0.00 %                     | 0.00 %                        | 0.02 %                       | 0.00 %                      |               |
| 2.000  | -1.92               | 79.01 %                      | 20.78 %                     | 0.01 %                     | 0.00 %                        | 0.08 %                       | 0.11 %                      |               |
| 3.000  | -0.60               | 26.38 %                      | 69.38 %                     | 0.35 %                     | 0.00 %                        | 0.28 %                       | 3.62 %                      | Blood pH      |
| 4.000  | 0.48                | 2.36 %                       | 61.96 %                     | 3.11 %                     | 0.00 %                        | 0.25 %                       | 32.33 %                     |               |
| 5.000  | 1.34                | 0.06 %                       | 14.87 %                     | 7.45 %                     | 0.00 %                        | 0.06 %                       | 77.56 %                     |               |
| 6.000  | 1.73                | 0.00 %                       | 1.72 %                      | 8.61 %                     | 0.00 %                        | 0.01 %                       | 89.66 %                     |               |
| 6.500  | 1.79                | 0.00 %                       | 0.55 %                      | 8.72 %                     | 0.00 %                        | 0.00 %                       | 90.73 %                     |               |
| 7.000  | 1.80                | 0.00 %                       | 0.17 %                      | 8.75 %                     | 0.00 %                        | 0.00 %                       | 91.08 %                     |               |
| 7.400  | 1.81                | 0.00 %                       | 0.07 %                      | 8.76 %                     | 0.00 %                        | 0.00 %                       | 91.17 %                     |               |
| 8.000  | 1.81                | 0.00 %                       | 0.02 %                      | 8.76 %                     | 0.00 %                        | 0.00 %                       | 91.22 %                     |               |
| 9.000  | 1.81                | 0.00 %                       | 0.00 %                      | 8.76 %                     | 0.00 %                        | 0.00 %                       | 91.23 %                     |               |
| 10.000 | 1.81                | 0.00 %                       | 0.00 %                      | 8.76 %                     | 0.00 %                        | 0.00 %                       | 91.24 %                     |               |
| 11.000 | 1.81                | 0.00 %                       | 0.00 %                      | 8.76 %                     | 0.00 %                        | 0.00 %                       | 91.24 %                     |               |
| 12.000 | 1.81                | 0.00 %                       | 0.00 %                      | 8.76 %                     | 0.00 %                        | 0.00 %                       | 91.24 %                     |               |

## Carbonate and acidity

Carbonate 0.078 mM  
 Acidity error -0.092 mM

## Other graphs

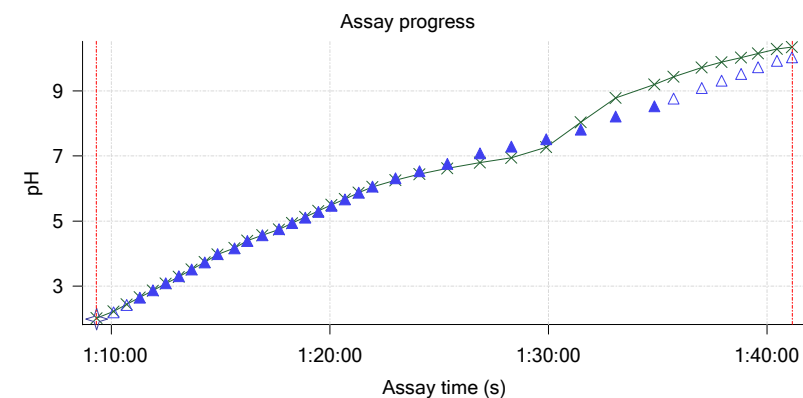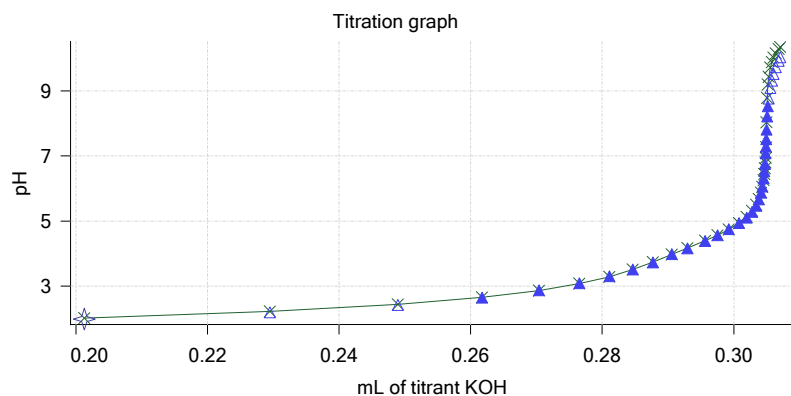

Sample name: **M15\_octanol**  
 Assay name: **pH-metric high logP**  
 Assay ID: **18C-01004**  
 Filename: **C:\Sirius\_T3\Mehtap\20180228\_exp28\_logP\_T3-2\18C-01004\_M15\_octanol\_pH-metric high logP.t3r**

Experiment start time: **3/1/2018 4:33:50 AM**  
 Analyst: **Pion**  
 Instrument ID: **T312060**

## Other graphs (continued)

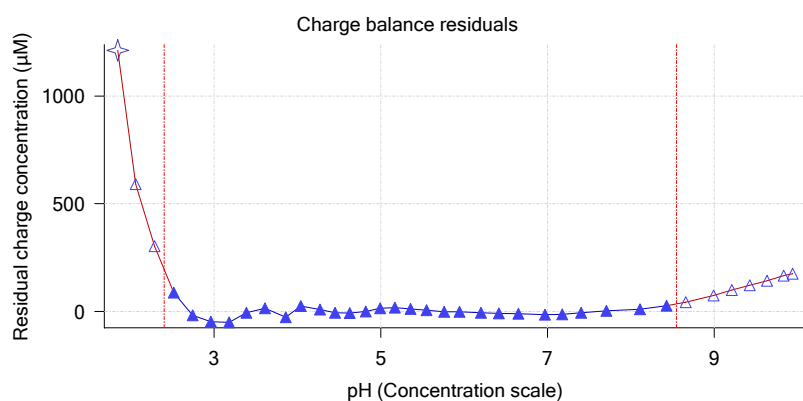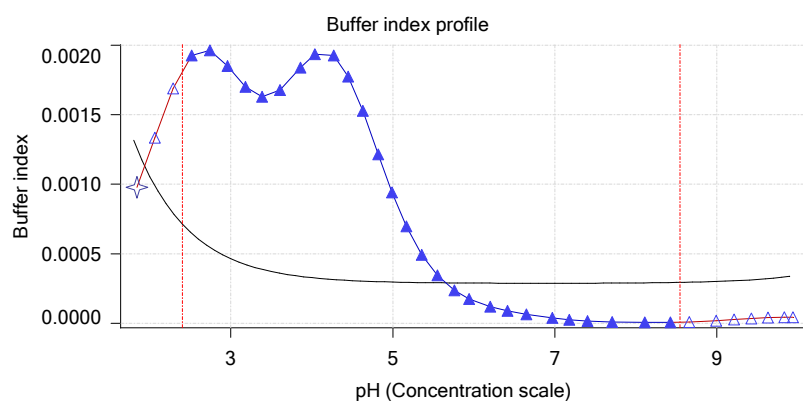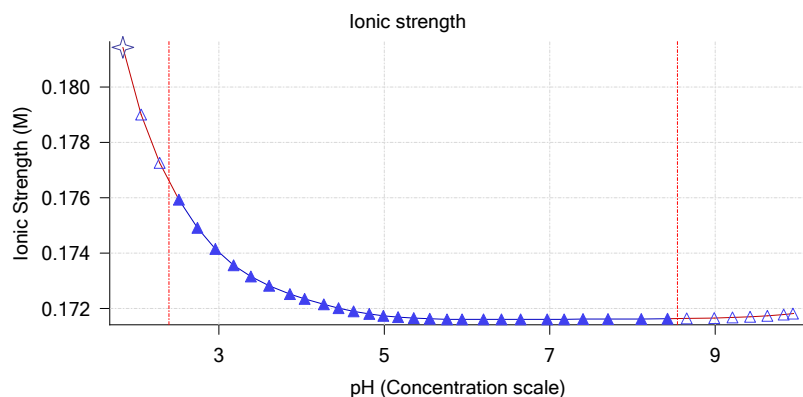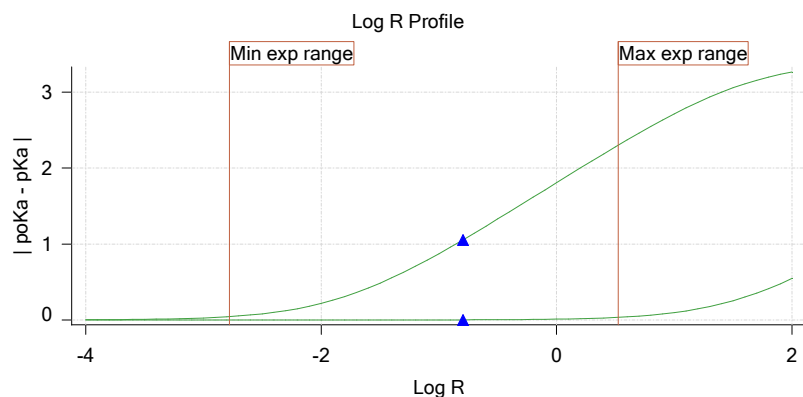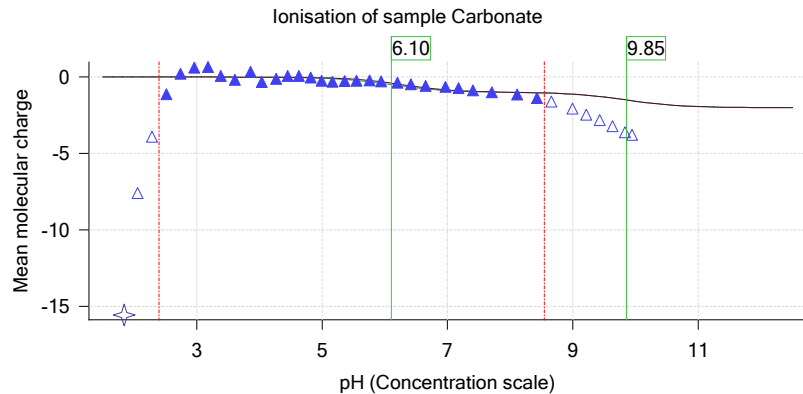

Sample name: **M15\_octanol**  
 Assay name: **pH-metric high logP**  
 Assay ID: **18C-01004**  
 Filename: **C:\Sirius\_T3\Mehtap\20180228\_exp28\_logP\_T3-2\18C-01004\_M15\_octanol\_pH-metric high logP.t3r**

Experiment start time: **3/1/2018 4:33:50 AM**  
 Analyst: **Pion**  
 Instrument ID: **T312060**

## Assay Model

| Settings                          | Value        | Date/Time changed    | Imported from      |
|-----------------------------------|--------------|----------------------|--------------------|
| Sample name                       | M15_octanol  | 2/27/2018 5:03:03 PM | User entered value |
| Sample by                         | Weight       |                      | Default value      |
| Sample weight                     | 0.001990 g   | 2/28/2018 4:25:17 PM | User entered value |
| Formula weight                    | 209.25 g/mol | 2/27/2018 5:03:03 PM | User entered value |
| Solubility                        | Unknown      |                      | Default value      |
| Molecular weight                  | 209.25       | 2/27/2018 5:03:03 PM | User entered value |
| Individual pKa ionic environments | No           |                      | Default value      |
| Number of pKas                    | 2            | 2/27/2018 5:03:03 PM | User entered value |
| Sample is a                       | Base         | 2/27/2018 5:03:03 PM | User entered value |
| pKa 1                             | 2.58         | 2/27/2018 5:03:03 PM | User entered value |
| pKa 2                             | 5.30         | 2/27/2018 5:03:03 PM | User entered value |
| logP (XH2 2+)                     | -5.50        | 2/28/2018 2:10:35 PM | User entered value |
| logp (XH +)                       | -4.96        | 2/28/2018 2:10:28 PM | User entered value |
| logP (neutral X)                  | 1.92         | 2/28/2018 2:10:15 PM | User entered value |

## Events

| Time    | Event             | Water      | Acid       | Base       | Octanol    | pH     | dpH/dt   | pH R-squared | pH SD   | dpH/dt time         |
|---------|-------------------|------------|------------|------------|------------|--------|----------|--------------|---------|---------------------|
| 9:11.8  | Initial pH = 7.75 |            |            |            |            |        |          |              |         |                     |
| 12:12.6 | Data point 1      | 2.20002 mL | 0.09603 mL | 0.00355 mL | 0.05000 mL | 2.004  | -0.00004 | 0.00005      | 0.00026 | 10.5 s              |
| 12:59.6 | Data point 2      | 2.20002 mL | 0.09603 mL | 0.02693 mL | 0.05000 mL | 2.218  | -0.00410 | 0.09174      | 0.00067 | 10.0 s              |
| 13:35.4 | Data point 3      | 2.20002 mL | 0.09603 mL | 0.04276 mL | 0.05000 mL | 2.434  | -0.00622 | 0.41443      | 0.00048 | 10.0 s              |
| 14:11.0 | Data point 4      | 2.20002 mL | 0.09603 mL | 0.05341 mL | 0.05000 mL | 2.647  | -0.00112 | 0.17193      | 0.00013 | 10.0 s              |
| 14:46.6 | Data point 5      | 2.20002 mL | 0.09603 mL | 0.06084 mL | 0.05000 mL | 2.863  | -0.00762 | 0.16820      | 0.00092 | 10.0 s              |
| 15:22.1 | Data point 6      | 2.20002 mL | 0.09603 mL | 0.06606 mL | 0.05000 mL | 3.086  | -0.00070 | 0.05715      | 0.00014 | 10.0 s              |
| 15:57.6 | Data point 7      | 2.20002 mL | 0.09603 mL | 0.06973 mL | 0.05000 mL | 3.269  | -0.00182 | 0.13794      | 0.00024 | 10.0 s              |
| 16:33.1 | Data point 8      | 2.20002 mL | 0.09603 mL | 0.07246 mL | 0.05000 mL | 3.476  | -0.00683 | 0.20917      | 0.00074 | 10.0 s              |
| 17:08.6 | Data point 9      | 2.20002 mL | 0.09603 mL | 0.07446 mL | 0.05000 mL | 3.682  | -0.00883 | 0.24236      | 0.00089 | 10.0 s              |
| 17:44.1 | Data point 10     | 2.20002 mL | 0.09603 mL | 0.07606 mL | 0.05000 mL | 3.870  | -0.00207 | 0.48492      | 0.00015 | 10.5 s              |
| 18:20.0 | Data point 11     | 2.20002 mL | 0.09603 mL | 0.07752 mL | 0.05000 mL | 4.027  | -0.00297 | 0.52144      | 0.00020 | 10.0 s              |
| 19:11.0 | Data point 12     | 2.20002 mL | 0.09603 mL | 0.07902 mL | 0.05000 mL | 4.224  | 0.00693  | 0.14332      | 0.00090 | 10.0 s              |
| 19:46.5 | Data point 13     | 2.20002 mL | 0.09603 mL | 0.08067 mL | 0.05000 mL | 4.495  | -0.00297 | 0.63948      | 0.00018 | 10.0 s              |
| 20:32.2 | Data point 14     | 2.20002 mL | 0.09603 mL | 0.08224 mL | 0.05000 mL | 4.685  | -0.00829 | 0.27907      | 0.00078 | 10.0 s              |
| 21:18.0 | Data point 15     | 2.20002 mL | 0.09603 mL | 0.08405 mL | 0.05000 mL | 4.873  | -0.00361 | 0.81281      | 0.00020 | 10.5 s              |
| 22:04.3 | Data point 16     | 2.20002 mL | 0.09603 mL | 0.08615 mL | 0.05000 mL | 5.061  | -0.00994 | 0.26388      | 0.00096 | 10.0 s              |
| 22:39.8 | Data point 17     | 2.20002 mL | 0.09603 mL | 0.08831 mL | 0.05000 mL | 5.249  | -0.01621 | 0.90472      | 0.00084 | 10.0 s              |
| 23:15.2 | Data point 18     | 2.20002 mL | 0.09603 mL | 0.09019 mL | 0.05000 mL | 5.466  | -0.00885 | 0.83876      | 0.00048 | 10.5 s              |
| 23:51.2 | Data point 19     | 2.20002 mL | 0.09603 mL | 0.09167 mL | 0.05000 mL | 5.704  | -0.01077 | 0.55398      | 0.00071 | 10.0 s              |
| 24:36.9 | Data point 20     | 2.20002 mL | 0.09603 mL | 0.09262 mL | 0.05000 mL | 5.896  | -0.01015 | 0.64626      | 0.00062 | 10.0 s              |
| 25:12.4 | Data point 21     | 2.20002 mL | 0.09603 mL | 0.09337 mL | 0.05000 mL | 6.150  | -0.01917 | 0.94736      | 0.00097 | 11.5 s              |
| 25:54.3 | Data point 22     | 2.20002 mL | 0.09603 mL | 0.09384 mL | 0.05000 mL | 6.348  | -0.01956 | 0.94838      | 0.00099 | 16.0 s              |
| 26:35.7 | Data point 23     | 2.20002 mL | 0.09603 mL | 0.09417 mL | 0.05000 mL | 6.477  | -0.01852 | 0.92877      | 0.00095 | 20.5 s              |
| 27:26.8 | Data point 24     | 2.20002 mL | 0.09603 mL | 0.09447 mL | 0.05000 mL | 6.731  | -0.01978 | 0.97668      | 0.00099 | 25.0 s              |
| 28:22.5 | Data point 25     | 2.20002 mL | 0.09603 mL | 0.09476 mL | 0.05000 mL | 7.091  | -0.01939 | 0.96778      | 0.00097 | 50.5 s              |
| 29:48.7 | Data point 26     | 2.20002 mL | 0.09603 mL | 0.09492 mL | 0.05000 mL | 7.427  | -0.02618 | 0.93832      | 0.00134 | Timed out at 59.5 s |
| 31:24.4 | Data point 27     | 2.20002 mL | 0.09603 mL | 0.09499 mL | 0.05000 mL | 7.765  | -0.02782 | 0.96820      | 0.00140 | Timed out at 59.5 s |
| 32:60.0 | Data point 28     | 2.20002 mL | 0.09603 mL | 0.09506 mL | 0.05000 mL | 8.150  | -0.01942 | 0.97507      | 0.00097 | 51.5 s              |
| 34:27.2 | Data point 29     | 2.20002 mL | 0.09603 mL | 0.09513 mL | 0.05000 mL | 8.488  | -0.01822 | 0.88544      | 0.00096 | 47.0 s              |
| 35:55.0 | Data point 30     | 2.20002 mL | 0.09603 mL | 0.09523 mL | 0.05000 mL | 8.742  | -0.01803 | 0.81814      | 0.00098 | 18.0 s              |
| 36:53.9 | Data point 31     | 2.20002 mL | 0.09603 mL | 0.09539 mL | 0.05000 mL | 8.998  | -0.01906 | 0.91802      | 0.00098 | 29.5 s              |
| 37:59.3 | Data point 32     | 2.20002 mL | 0.09603 mL | 0.09556 mL | 0.05000 mL | 9.231  | -0.01960 | 0.94492      | 0.00100 | 24.5 s              |
| 38:59.8 | Data point 33     | 2.20002 mL | 0.09603 mL | 0.09577 mL | 0.05000 mL | 9.473  | -0.01978 | 0.98072      | 0.00099 | 14.0 s              |
| 39:44.2 | Data point 34     | 2.20002 mL | 0.09603 mL | 0.09605 mL | 0.05000 mL | 9.727  | -0.01838 | 0.95975      | 0.00093 | 13.0 s              |
| 40:32.9 | Data point 35     | 2.20002 mL | 0.09603 mL | 0.09640 mL | 0.05000 mL | 9.921  | -0.01891 | 0.96239      | 0.00095 | 11.0 s              |
| 41:14.5 | Data point 36     | 2.20002 mL | 0.09603 mL | 0.09666 mL | 0.05000 mL | 10.042 | -0.01797 | 0.91702      | 0.00093 | 10.0 s              |

Sample name: **M15\_octanol**  
 Assay name: **pH-metric high logP**  
 Assay ID: **18C-01004**  
 Filename: **C:\Sirius\_T3\Mehtap\20180228\_exp28\_logP\_T3-2\18C-01004\_M15\_octanol\_pH-metric high logP.t3r**

Experiment start time: **3/1/2018 4:33:50 AM**  
 Analyst: **Pion**  
 Instrument ID: **T312060**

## Events (continued)

| Time      | Event         | Water      | Acid       | Base       | Octanol    | pH     | dpH/dt   | pH R-squared | pH SD   | dpH/dt time         |
|-----------|---------------|------------|------------|------------|------------|--------|----------|--------------|---------|---------------------|
| 42:26.2   | Data point 37 | 2.20002 mL | 0.20071 mL | 0.09666 mL | 0.15000 mL | 1.959  | -0.00249 | 0.02483      | 0.00078 | 10.0 s              |
| 43:12.8   | Data point 38 | 2.20002 mL | 0.20071 mL | 0.12385 mL | 0.15000 mL | 2.169  | 0.00115  | 0.01005      | 0.00057 | 10.0 s              |
| 43:48.7   | Data point 39 | 2.20002 mL | 0.20071 mL | 0.14278 mL | 0.15000 mL | 2.387  | 0.00292  | 0.23411      | 0.00030 | 10.0 s              |
| 44:24.4   | Data point 40 | 2.20002 mL | 0.20071 mL | 0.15522 mL | 0.15000 mL | 2.607  | 0.00278  | 0.64171      | 0.00017 | 10.0 s              |
| 45:00.1   | Data point 41 | 2.20002 mL | 0.20071 mL | 0.16369 mL | 0.15000 mL | 2.825  | 0.00765  | 0.45122      | 0.00056 | 10.0 s              |
| 45:35.6   | Data point 42 | 2.20002 mL | 0.20071 mL | 0.16964 mL | 0.15000 mL | 3.053  | 0.00261  | 0.02150      | 0.00088 | 10.0 s              |
| 46:11.0   | Data point 43 | 2.20002 mL | 0.20071 mL | 0.17382 mL | 0.15000 mL | 3.254  | -0.00337 | 0.07118      | 0.00062 | 10.0 s              |
| 46:46.5   | Data point 44 | 2.20002 mL | 0.20071 mL | 0.17695 mL | 0.15000 mL | 3.476  | -0.00111 | 0.17901      | 0.00013 | 10.0 s              |
| 47:22.0   | Data point 45 | 2.20002 mL | 0.20071 mL | 0.17935 mL | 0.15000 mL | 3.673  | -0.00484 | 0.08087      | 0.00084 | 10.5 s              |
| 47:58.0   | Data point 46 | 2.20002 mL | 0.20071 mL | 0.18144 mL | 0.15000 mL | 3.869  | -0.00085 | 0.00291      | 0.00078 | 10.5 s              |
| 48:34.0   | Data point 47 | 2.20002 mL | 0.20071 mL | 0.18347 mL | 0.15000 mL | 4.074  | -0.00208 | 0.18891      | 0.00024 | 10.0 s              |
| 49:09.5   | Data point 48 | 2.20002 mL | 0.20071 mL | 0.18561 mL | 0.15000 mL | 4.321  | 0.00313  | 0.03406      | 0.00084 | 10.5 s              |
| 49:55.8   | Data point 49 | 2.20002 mL | 0.20071 mL | 0.18756 mL | 0.15000 mL | 4.505  | -0.00239 | 0.41560      | 0.00018 | 10.0 s              |
| 50:46.8   | Data point 50 | 2.20002 mL | 0.20071 mL | 0.18989 mL | 0.15000 mL | 4.692  | 0.00658  | 0.10707      | 0.00099 | 10.0 s              |
| 51:22.3   | Data point 51 | 2.20002 mL | 0.20071 mL | 0.19215 mL | 0.15000 mL | 4.901  | -0.00276 | 0.35548      | 0.00023 | 10.5 s              |
| 51:58.2   | Data point 52 | 2.20002 mL | 0.20071 mL | 0.19410 mL | 0.15000 mL | 5.136  | -0.00855 | 0.19756      | 0.00095 | 10.0 s              |
| 52:44.0   | Data point 53 | 2.20002 mL | 0.20071 mL | 0.19539 mL | 0.15000 mL | 5.320  | 0.01104  | 0.48343      | 0.00078 | 10.5 s              |
| 53:19.9   | Data point 54 | 2.20002 mL | 0.20071 mL | 0.19652 mL | 0.15000 mL | 5.575  | -0.01538 | 0.61586      | 0.00097 | 10.0 s              |
| 54:00.5   | Data point 55 | 2.20002 mL | 0.20071 mL | 0.19718 mL | 0.15000 mL | 5.767  | -0.01599 | 0.72745      | 0.00093 | 10.5 s              |
| 54:36.4   | Data point 56 | 2.20002 mL | 0.20071 mL | 0.19770 mL | 0.15000 mL | 5.995  | -0.01720 | 0.89603      | 0.00090 | 12.5 s              |
| 55:14.3   | Data point 57 | 2.20002 mL | 0.20071 mL | 0.19805 mL | 0.15000 mL | 6.194  | -0.01773 | 0.93943      | 0.00090 | 15.0 s              |
| 55:54.8   | Data point 58 | 2.20002 mL | 0.20071 mL | 0.19831 mL | 0.15000 mL | 6.473  | -0.01702 | 0.93578      | 0.00087 | 32.0 s              |
| 56:57.3   | Data point 59 | 2.20002 mL | 0.20071 mL | 0.19859 mL | 0.15000 mL | 6.955  | -0.02431 | 0.97693      | 0.00121 | Timed out at 59.5 s |
| 58:33.1   | Data point 60 | 2.20002 mL | 0.20071 mL | 0.19885 mL | 0.15000 mL | 7.955  | -0.04787 | 0.97420      | 0.00240 | Timed out at 59.5 s |
| 1:00:08.8 | Data point 61 | 2.20002 mL | 0.20071 mL | 0.19899 mL | 0.15000 mL | 8.265  | -0.01855 | 0.84395      | 0.00100 | 59.0 s              |
| 1:01:48.7 | Data point 62 | 2.20002 mL | 0.20071 mL | 0.19913 mL | 0.15000 mL | 8.503  | -0.01414 | 0.67047      | 0.00085 | 31.5 s              |
| 1:02:55.9 | Data point 63 | 2.20002 mL | 0.20071 mL | 0.19925 mL | 0.15000 mL | 8.736  | -0.01917 | 0.92795      | 0.00098 | 28.0 s              |
| 1:04:04.8 | Data point 64 | 2.20002 mL | 0.20071 mL | 0.19948 mL | 0.15000 mL | 8.945  | -0.01399 | 0.56454      | 0.00092 | 14.5 s              |
| 1:04:54.9 | Data point 65 | 2.20002 mL | 0.20071 mL | 0.19984 mL | 0.15000 mL | 9.265  | -0.01776 | 0.81338      | 0.00097 | 22.5 s              |
| 1:05:53.3 | Data point 66 | 2.20002 mL | 0.20071 mL | 0.20012 mL | 0.15000 mL | 9.476  | -0.01942 | 0.96420      | 0.00098 | 13.5 s              |
| 1:06:37.4 | Data point 67 | 2.20002 mL | 0.20071 mL | 0.20042 mL | 0.15000 mL | 9.700  | -0.01799 | 0.94238      | 0.00092 | 11.0 s              |
| 1:07:18.9 | Data point 68 | 2.20002 mL | 0.20071 mL | 0.20082 mL | 0.15000 mL | 9.916  | -0.01678 | 0.93188      | 0.00086 | 10.5 s              |
| 1:08:00.0 | Data point 69 | 2.20002 mL | 0.20071 mL | 0.20125 mL | 0.15000 mL | 10.094 | -0.01862 | 0.92012      | 0.00096 | 13.5 s              |
| 1:09:19.8 | Data point 70 | 2.20002 mL | 0.30703 mL | 0.20125 mL | 0.45000 mL | 1.978  | -0.00661 | 0.17199      | 0.00079 | 10.0 s              |
| 1:10:06.4 | Data point 71 | 2.20002 mL | 0.30703 mL | 0.22949 mL | 0.45000 mL | 2.191  | 0.00020  | 0.00450      | 0.00015 | 10.0 s              |
| 1:10:42.3 | Data point 72 | 2.20002 mL | 0.30703 mL | 0.24894 mL | 0.45000 mL | 2.413  | -0.00624 | 0.12108      | 0.00089 | 10.5 s              |
| 1:11:18.6 | Data point 73 | 2.20002 mL | 0.30703 mL | 0.26174 mL | 0.45000 mL | 2.641  | -0.00127 | 0.02629      | 0.00039 | 10.0 s              |
| 1:11:54.2 | Data point 74 | 2.20002 mL | 0.30703 mL | 0.27039 mL | 0.45000 mL | 2.864  | 0.01123  | 0.56243      | 0.00074 | 10.0 s              |
| 1:12:29.8 | Data point 75 | 2.20002 mL | 0.30703 mL | 0.27653 mL | 0.45000 mL | 3.082  | 0.00260  | 0.02083      | 0.00089 | 10.0 s              |
| 1:13:05.3 | Data point 76 | 2.20002 mL | 0.30703 mL | 0.28109 mL | 0.45000 mL | 3.300  | 0.00115  | 0.17309      | 0.00014 | 10.0 s              |
| 1:13:40.9 | Data point 77 | 2.20002 mL | 0.30703 mL | 0.28467 mL | 0.45000 mL | 3.507  | -0.00125 | 0.06719      | 0.00024 | 10.0 s              |
| 1:14:16.4 | Data point 78 | 2.20002 mL | 0.30703 mL | 0.28772 mL | 0.45000 mL | 3.728  | -0.00003 | 0.00007      | 0.00016 | 10.0 s              |
| 1:14:51.9 | Data point 79 | 2.20002 mL | 0.30703 mL | 0.29057 mL | 0.45000 mL | 3.979  | 0.00062  | 0.00143      | 0.00080 | 10.5 s              |
| 1:15:38.3 | Data point 80 | 2.20002 mL | 0.30703 mL | 0.29299 mL | 0.45000 mL | 4.156  | 0.00694  | 0.12696      | 0.00096 | 10.0 s              |
| 1:16:13.8 | Data point 81 | 2.20002 mL | 0.30703 mL | 0.29563 mL | 0.45000 mL | 4.386  | -0.00283 | 0.55635      | 0.00019 | 10.0 s              |
| 1:16:54.4 | Data point 82 | 2.20002 mL | 0.30703 mL | 0.29753 mL | 0.45000 mL | 4.567  | 0.00299  | 0.02388      | 0.00096 | 10.5 s              |
| 1:17:40.7 | Data point 83 | 2.20002 mL | 0.30703 mL | 0.29925 mL | 0.45000 mL | 4.745  | 0.01034  | 0.46849      | 0.00075 | 10.5 s              |
| 1:18:16.7 | Data point 84 | 2.20002 mL | 0.30703 mL | 0.30080 mL | 0.45000 mL | 4.934  | -0.00687 | 0.30375      | 0.00062 | 10.5 s              |
| 1:18:52.6 | Data point 85 | 2.20002 mL | 0.30703 mL | 0.30195 mL | 0.45000 mL | 5.106  | -0.00848 | 0.37580      | 0.00068 | 10.5 s              |
| 1:19:28.6 | Data point 86 | 2.20002 mL | 0.30703 mL | 0.30280 mL | 0.45000 mL | 5.282  | -0.00416 | 0.04532      | 0.00097 | 10.5 s              |
| 1:20:04.5 | Data point 87 | 2.20002 mL | 0.30703 mL | 0.30341 mL | 0.45000 mL | 5.472  | 0.00416  | 0.04632      | 0.00095 | 11.5 s              |
| 1:20:41.4 | Data point 88 | 2.20002 mL | 0.30703 mL | 0.30383 mL | 0.45000 mL | 5.662  | 0.00750  | 0.22112      | 0.00079 | 12.5 s              |
| 1:21:19.3 | Data point 89 | 2.20002 mL | 0.30703 mL | 0.30414 mL | 0.45000 mL | 5.871  | -0.01602 | 0.74413      | 0.00092 | 12.5 s              |
| 1:21:57.2 | Data point 90 | 2.20002 mL | 0.30703 mL | 0.30435 mL | 0.45000 mL | 6.055  | -0.01729 | 0.85517      | 0.00092 | 32.5 s              |
| 1:23:00.4 | Data point 91 | 2.20002 mL | 0.30703 mL | 0.30454 mL | 0.45000 mL | 6.313  | -0.01803 | 0.92861      | 0.00092 | 40.0 s              |

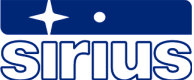

## Assay Events

Sample name: **M15\_octanol**  
Assay name: **pH-metric high logP**  
Assay ID: **18C-01004**  
Filename: **C:\Sirius\_T3\Mehtap\20180228\_exp28\_logP\_T3-2\18C-01004\_M15\_octanol\_pH-metric high logP.t3r**

Experiment start time: **3/1/2018 4:33:50 AM**  
Analyst: **Pion**  
Instrument ID: **T312060**

## Events (continued)

| Time      | Event          | Water      | Acid       | Base       | Octanol    | pH     | dpH/dt   | pH R-squared | pH SD   | dpH/dt time         |
|-----------|----------------|------------|------------|------------|------------|--------|----------|--------------|---------|---------------------|
| 1:24:05.7 | Data point 92  | 2.20002 mL | 0.30703 mL | 0.30466 mL | 0.45000 mL | 6.527  | -0.01857 | 0.95760      | 0.00094 | 51.0 s              |
| 1:25:22.1 | Data point 93  | 2.20002 mL | 0.30703 mL | 0.30475 mL | 0.45000 mL | 6.759  | -0.01815 | 0.93102      | 0.00093 | 59.5 s              |
| 1:26:52.2 | Data point 94  | 2.20002 mL | 0.30703 mL | 0.30482 mL | 0.45000 mL | 7.078  | -0.04861 | 0.94386      | 0.00247 | Timed out at 59.5 s |
| 1:28:17.6 | Data point 95  | 2.20002 mL | 0.30703 mL | 0.30487 mL | 0.45000 mL | 7.285  | -0.04933 | 0.98898      | 0.00245 | Timed out at 59.5 s |
| 1:29:53.3 | Data point 96  | 2.20002 mL | 0.30703 mL | 0.30494 mL | 0.45000 mL | 7.511  | -0.04973 | 0.95602      | 0.00251 | Timed out at 59.5 s |
| 1:31:28.9 | Data point 97  | 2.20002 mL | 0.30703 mL | 0.30501 mL | 0.45000 mL | 7.812  | -0.04080 | 0.98347      | 0.00203 | Timed out at 59.5 s |
| 1:33:04.5 | Data point 98  | 2.20002 mL | 0.30703 mL | 0.30508 mL | 0.45000 mL | 8.214  | -0.02455 | 0.95406      | 0.00124 | Timed out at 59.5 s |
| 1:34:50.4 | Data point 99  | 2.20002 mL | 0.30703 mL | 0.30520 mL | 0.45000 mL | 8.531  | -0.01310 | 0.49687      | 0.00092 | 17.0 s              |
| 1:35:43.0 | Data point 100 | 2.20002 mL | 0.30703 mL | 0.30532 mL | 0.45000 mL | 8.762  | -0.01738 | 0.82617      | 0.00094 | 31.5 s              |
| 1:37:00.5 | Data point 101 | 2.20002 mL | 0.30703 mL | 0.30557 mL | 0.45000 mL | 9.094  | -0.00556 | 0.09210      | 0.00091 | 13.5 s              |
| 1:37:54.9 | Data point 102 | 2.20002 mL | 0.30703 mL | 0.30581 mL | 0.45000 mL | 9.313  | -0.01317 | 0.45469      | 0.00096 | 18.0 s              |
| 1:38:48.6 | Data point 103 | 2.20002 mL | 0.30703 mL | 0.30607 mL | 0.45000 mL | 9.526  | -0.01066 | 0.32164      | 0.00093 | 11.0 s              |
| 1:39:35.3 | Data point 104 | 2.20002 mL | 0.30703 mL | 0.30640 mL | 0.45000 mL | 9.732  | -0.01018 | 0.39405      | 0.00080 | 11.0 s              |
| 1:40:27.1 | Data point 105 | 2.20002 mL | 0.30703 mL | 0.30682 mL | 0.45000 mL | 9.932  | -0.01216 | 0.85368      | 0.00065 | 10.5 s              |
| 1:41:08.2 | Data point 106 | 2.20002 mL | 0.30703 mL | 0.30708 mL | 0.45000 mL | 10.040 | -0.01217 | 0.84433      | 0.00065 | 10.0 s              |
| 1:41:27.3 | Assay volumes  | 2.20002 mL | 0.30703 mL | 0.30708 mL | 0.45000 mL |        |          |              |         |                     |



Sample name: **M15\_octanol**  
 Assay name: **pH-metric high logP**  
 Assay ID: **18C-01004**  
 Filename: **C:\Sirius\_T3\Mehtap\20180228\_exp28\_logP\_T3-2\18C-01004\_M15\_octanol\_pH-metric high logP.t3r**

Experiment start time: **3/1/2018 4:33:50 AM**  
 Analyst: **Pion**  
 Instrument ID: **T312060**

## Assay Settings

| Setting                             | Value              | Original Value | Date/Time changed | Imported from |
|-------------------------------------|--------------------|----------------|-------------------|---------------|
| <b>General Settings</b>             |                    |                |                   |               |
| Analyst name                        | Pion               |                |                   |               |
| <b>Standard Experiment Settings</b> |                    |                |                   |               |
| Number of titrations                | 3                  |                |                   |               |
| Minimum pH                          | 2.000              |                |                   |               |
| Maximum pH                          | 10.000             |                |                   |               |
| pH step between points of           | 0.200              |                |                   |               |
| Minimum titrant addition            | 0.00002 mL         |                |                   |               |
| Maximum titrant addition            | 0.10000 mL         |                |                   |               |
| Argon flow rate                     | 100%               |                |                   |               |
| Start titration using               | Cautious pH adjust |                |                   |               |
| <b>Advanced General Settings</b>    |                    |                |                   |               |
| Detect turbidity using              | None               |                |                   |               |
| Collect turbidity sensor data       | No                 |                |                   |               |
| Collect UV spectra                  | No                 |                |                   |               |
| Stir after titrant addition for     | 5 seconds          |                |                   |               |
| For titrant addition, stir at       | 10%                |                |                   |               |
| <b>Titration Pre-Dose</b>           |                    |                |                   |               |
| Titration pre-dose                  | None               |                |                   |               |
| <b>Assay Medium</b>                 |                    |                |                   |               |
| ISA water volume                    | 2.20 mL            |                |                   |               |
| Water added                         | Automatic          |                |                   |               |
| Partition solvent type              | Octanol            |                |                   |               |
| Partition volume                    | 0.050 mL           |                |                   |               |
| Partition solvent added             | Automatic          |                |                   |               |
| After partition addition, stir for  | 1 seconds          |                |                   |               |
| <b>Sample Sonication</b>            |                    |                |                   |               |
| Sonicate                            | Yes                |                |                   |               |
| Adjust pH for sonication            | No                 |                |                   |               |
| Sonicate for                        | 300 seconds        |                |                   |               |
| After sonication stir for           | 5 seconds          |                |                   |               |
| <b>Sample Dissolution</b>           |                    |                |                   |               |
| Perform a dissolution stage         | Yes                |                |                   |               |
| Adjust and hold pH for dissolution  | To start pH        |                |                   |               |
| Stir to dissolve for                | 120 seconds        |                |                   |               |
| For dissolution, stir at            | 10%                |                |                   |               |
| <b>Carbonate purge</b>              |                    |                |                   |               |
| Perform a carbonate purge           | No                 |                |                   |               |
| <b>Temperature Control</b>          |                    |                |                   |               |
| Wait for temperature                | Yes                |                |                   |               |
| Required start temperature          | 25.0°C             |                |                   |               |
| Acceptable deviation                | 0.5°C              |                |                   |               |
| Time to wait                        | 60 seconds         |                |                   |               |
| Stir speed of                       | 50%                |                |                   |               |
| <b>Titration 1</b>                  |                    |                |                   |               |
| Titrate from                        | Low to high pH     |                |                   |               |
| Adjust to start pH                  | Yes                |                |                   |               |
| After pH adjust stir for            | 30 seconds         |                |                   |               |
| Stir to allow partitioning for      | 15 seconds         |                |                   |               |
| Stirrer speed for partitioning      | 50%                |                |                   |               |
| <b>Titration 2</b>                  |                    |                |                   |               |
| Titrate from                        | Low to high pH     |                |                   |               |
| Add additional water                | 0.00 mL            |                |                   |               |
| Additional partition solvent volume | 0.100 mL           |                |                   |               |
| Additional partition solvent added  | Automatic          |                |                   |               |
| After pH adjust stir for            | 30 seconds         |                |                   |               |
| Stir to allow partitioning for      | 15 seconds         |                |                   |               |
| Stirrer speed for partitioning      | 55%                |                |                   |               |



Sample name: **M15\_octanol**  
Assay name: **pH-metric high logP**  
Assay ID: **18C-01004**  
Filename: **C:\Sirius\_T3\Mehtap\20180228\_exp28\_logP\_T3-2\18C-01004\_M15\_octanol\_pH-metric high logP.t3r**

Experiment start time: **3/1/2018 4:33:50 AM**  
Analyst: **Pion**  
Instrument ID: **T312060**

## Assay Settings (continued)

| Setting                             | Value          | Original Value | Date/Time changed | Imported from |
|-------------------------------------|----------------|----------------|-------------------|---------------|
| <b>Titration 3</b>                  |                |                |                   |               |
| Titrate from                        | Low to high pH |                |                   |               |
| Add additional water                | 0.00 mL        |                |                   |               |
| Additional partition solvent volume | 0.300 mL       |                |                   |               |
| Additional partition solvent added  | Automatic      |                |                   |               |
| After pH adjust stir for            | 30 seconds     |                |                   |               |
| Stir to allow partitioning for      | 15 seconds     |                |                   |               |
| Stirrer speed for partitioning      | 60%            |                |                   |               |
| <b>Data Point Stability</b>         |                |                |                   |               |
| Stir during data point collection   | No             |                |                   |               |
| Delay before data point collection  | 0 seconds      |                |                   |               |
| Number of points to average         | 20 points      |                |                   |               |
| Time interval between points        | 0.50 seconds   |                |                   |               |
| Required maximum standard deviation | 0.00100 dpH/dt |                |                   |               |
| Stability timeout after             | 60 seconds     |                |                   |               |

## Calibration Settings

| Setting                   | Value  | Date/Time changed   | Imported from             |
|---------------------------|--------|---------------------|---------------------------|
| Four-Plus alpha           | 0.130  | 3/1/2018 4:33:50 AM | C:\Sirius_T3\HCl18B27.t3r |
| Four-Plus S               | 0.9970 | 3/1/2018 4:33:50 AM | C:\Sirius_T3\HCl18B27.t3r |
| Four-Plus jH              | 0.8    | 3/1/2018 4:33:50 AM | C:\Sirius_T3\HCl18B27.t3r |
| Four-Plus jOH             | -0.4   | 3/1/2018 4:33:50 AM | C:\Sirius_T3\HCl18B27.t3r |
| Base concentration factor | 1.000  | 3/1/2018 4:33:50 AM | C:\Sirius_T3\KOH18B27.t3r |
| Acid concentration factor | 0.994  | 3/1/2018 4:33:50 AM | C:\Sirius_T3\HCl18B27.t3r |

## Instrument Settings

| Setting              | Value                      | Batch Id    | Install date           |
|----------------------|----------------------------|-------------|------------------------|
| Instrument owner     | Merck                      |             |                        |
| Instrument ID        | T312060                    |             |                        |
| Instrument type      | T3 Simulator               |             |                        |
| Software version     | 1.1.3.0                    |             |                        |
| Dispenser module     |                            | T3DM1200361 | 3/31/2009 5:24:52 AM   |
| Dispenser 0          | Water                      |             | 3/31/2009 5:25:05 AM   |
| Syringe volume       | 2.5 mL                     |             |                        |
| Firmware version     | 1.2.1(r2)                  |             |                        |
| Titrant              | Water (0.15 M KCl)         | 02-06-2018  | 2/27/2018 10:05:59 AM  |
| Dispenser 2          | Acid                       |             | 3/31/2009 5:25:11 AM   |
| Syringe volume       | 0.5 mL                     |             |                        |
| Firmware version     | 1.2.1(r2)                  |             |                        |
| Titrant              | Acid (0.5 M HCl)           | 02-27-2018  | 2/27/2018 10:27:22 AM  |
| Dispenser 1          | Base                       |             | 3/31/2009 5:25:21 AM   |
| Syringe volume       | 0.5 mL                     |             |                        |
| Firmware version     | 1.2.1(r2)                  |             |                        |
| Titrant              | Base (0.5 M KOH)           | 9/22/2017   | 2/27/2018 10:21:22 AM  |
| Dispenser 5          | Cosolvent                  |             | 3/31/2009 5:26:24 AM   |
| Syringe volume       | 2.5 mL                     |             |                        |
| Firmware version     | 1.2.1(r2)                  |             |                        |
| Distribution valve 5 | Distribution Valve         |             | 3/31/2009 5:28:19 AM   |
| Firmware version     | 1.1.3                      |             |                        |
| Port A               | Methanol (80%, 0.15 M KCl) | 09-26-17    | 2/7/2018 9:42:01 AM    |
| Port B               | Cyclohexane                | 11-01-17    | 2/27/2018 10:37:57 AM  |
| Dispenser 3          | Buffer                     |             | 8/3/2010 5:05:16 AM    |
| Syringe volume       | 0.5 mL                     |             |                        |
| Firmware version     | 1.2.1(r2)                  |             |                        |
| Titrant              | Dodecane                   | 2018/01/31  | 2/28/2018 10:18:04 AM  |
| Dispenser 6          | Octanol                    |             | 10/22/2010 10:52:43 AM |

Sample name: **M15\_octanol**  
 Assay name: **pH-metric high logP**  
 Assay ID: **18C-01004**  
 Filename: **C:\Sirius\_T3\Mehtap\20180228\_exp28\_logP\_T3-2\18C-01004\_M15\_octanol\_pH-metric high logP.t3r**

Experiment start time: **3/1/2018 4:33:50 AM**  
 Analyst: **Pion**  
 Instrument ID: **T312060**

## Instrument Settings (continued)

| Setting                                   | Value                      | Batch Id    | Install date           |
|-------------------------------------------|----------------------------|-------------|------------------------|
| Syringe volume                            | 0.5 mL                     |             |                        |
| Firmware version                          | 1.2.1(r2)                  |             |                        |
| Titrant                                   | Octanol                    | 01-31-2018  | 2/27/2018 9:59:35 AM   |
| Titration                                 |                            | T3TM1200161 | 3/31/2009 5:24:17 AM   |
| Horizontal axis firmware version          | 1.17 AI1DI2DO2 Stepper 2   |             |                        |
| Vertical axis firmware version            | 1.17 AI1DI2DO2 Stepper 2   |             |                        |
| Chassis I/O firmware version              | 1.11 AI1DI0DO4 Norgren I/O |             |                        |
| Probe I/O firmware version                | 1.1.1                      |             |                        |
| Electrode                                 | T3 Electrode               | T3E0923     | 1/23/2018 2:01:00 PM   |
| E0 calibration                            | +3.15 mV                   |             | 3/1/2018 4:34:18 AM    |
| Filling solution                          | 3M KCl                     | KCL097      | 2/27/2018 9:49:43 AM   |
| Liquids                                   |                            |             |                        |
| Wash 1                                    | 50% IPA:50% Water          |             | 2/28/2018 10:23:32 AM  |
| Wash 2                                    | 0.5% Triton X-100 in H2O   |             | 2/28/2018 10:23:34 AM  |
| Buffer position 1                         | pH7 Wash                   |             | 2/28/2018 10:24:06 AM  |
| Buffer position 2                         | pH 7                       |             | 2/28/2018 10:24:08 AM  |
| Storage position                          |                            |             | 2/28/2018 10:21:14 AM  |
| Wash water                                | 8.4e+003 mL                | 02-27-2018  | 2/27/2018 9:54:39 AM   |
| Waste                                     | 7e+003 mL                  |             | 11/28/2017 10:36:29 AM |
| Temperature controller                    |                            |             | 8/5/2010 6:35:13 AM    |
| Turbidity detector                        |                            |             | 3/31/2009 5:24:45 AM   |
| Spectrometer                              |                            | 074811      | 11/23/2010 11:22:28 AM |
| Dip probe                                 |                            | 10196       |                        |
| Wavelength coefficient A0                 | 183.333                    |             |                        |
| Wavelength coefficient A1                 | 2.21568                    |             |                        |
| Wavelength coefficient A2                 | -0.000289308               |             |                        |
| Total lamp lit time                       | 112:08:55                  |             | 11/23/2010 11:22:28 AM |
| Calibrated on                             | 2/27/2018 10:40:38 AM      |             |                        |
| Integration time                          | 40                         |             |                        |
| Scans averaged                            | 10                         |             |                        |
| Autoloader                                |                            | T3AL1200345 | 11/10/2015 9:34:13 AM  |
| Left-right axis firmware version          | 1.17 AI1DI2DO2 Stepper 2   |             |                        |
| Front-back axis firmware version          | 1.17 AI1DI2DO2 Stepper 2   |             |                        |
| Vertical axis firmware version            | 1.17 AI1DI2DO2 Stepper 2   |             |                        |
| Chassis I/O firmware version              | 1.11 AI1DI0DO4 Norgren I/O |             |                        |
| Configuration                             |                            |             |                        |
| Alternate titration position              | Titration position         |             |                        |
| Alternate reference position              | Reference position         |             |                        |
| Maximum standard vial volume              | 3.50 mL                    |             |                        |
| Maximum alternate vial volume             | 25.00 mL                   |             |                        |
| Automatic action idle period              | 5 minute(s)                |             |                        |
| Titration tube volume                     | 1.3 mL                     |             |                        |
| Syringe flush count                       | 3.50                       |             |                        |
| Flowing wash pump volume                  | 20.0 mL                    |             |                        |
| Flowing wash stir duration                | 5 s                        |             |                        |
| Flowing wash stir speed                   | 30%                        |             |                        |
| Solvent wash stir duration                | 5 s                        |             |                        |
| Solvent wash stir speed                   | 30%                        |             |                        |
| Surfactant wash stir duration             | 5 s                        |             |                        |
| Surfactant wash stir speed                | 30%                        |             |                        |
| E0 calibration minimum number of points   | 10                         |             |                        |
| E0 calibration maximum standard deviation | 0.01500                    |             |                        |
| E0 calibration timeout period             | 60 s                       |             |                        |
| E0 calibration stir duration              | 5 s                        |             |                        |
| E0 calibration preparation stir speed     | 30%                        |             |                        |
| E0 calibration buffer wash stir duration  | 5 s                        |             |                        |
| E0 calibration buffer wash stir speed     | 30%                        |             |                        |
| E0 calibration reading stir speed         | 0%                         |             |                        |

Sample name: **M15\_octanol** Experiment start time: **3/1/2018 4:33:50 AM**  
 Assay name: **pH-metric high logP** Analyst: **Pion**  
 Assay ID: **18C-01004** Instrument ID: **T312060**  
 Filename: **C:\Sirius\_T3\Mehtap\20180228\_exp28\_logP\_T3-2\18C-01004\_M15\_octanol\_pH-metric high logP.t3r**

## Instrument Settings (continued)

| Setting                                     | Value   | Batch Id | Install date |
|---------------------------------------------|---------|----------|--------------|
| Spectrometer calibration stir duration      | 5 s     |          |              |
| Spectrometer calibration stir speed         | 30%     |          |              |
| Spectrometer calibration wash pump volume   | 20.0 mL |          |              |
| Spectrometer calibration wash stir duration | 5 s     |          |              |
| Spectrometer calibration wash stir speed    | 30%     |          |              |
| Overhead dispense height                    | 10000   |          |              |

## Refinement Settings

| Setting                        | Value    | Default value |
|--------------------------------|----------|---------------|
| Turbidity detection method     | None     | None          |
| Turbidity wavelength to assess | 500.0 nm | 500.0 nm      |
| Turbidity maximum absorbance   | 0.100    | 0.100         |
| Turbidity probe threshold      | 50.00    | 50.00         |

## Experiment Log

[2:38] Air gap created for Water (0.15 M KCl)  
 [2:38] Air gap created for Acid (0.5 M HCl)  
 [2:38] Air gap created for Base (0.5 M KOH)  
 [2:39] Air gap released for Water (0.15 M KCl)  
 [2:42] Titrator arm moved over Titration position  
 [2:42] Titration 1 of 3  
 [2:42] Adding initial titrants  
 [2:42] Automatically add 2.20000 mL of water  
 [3:19] Dispensed 2.200024 mL of Water (0.15 M KCl)  
 [3:24] Titrator arm moved over Drain  
 [9:05] Titrator arm moved to Titration position  
 [9:05] Argon flow rate set to 100  
 [9:05] Stirrer speed set to 10  
 [9:10] Automatically add 0.05000 mL of Octanol  
 [9:11] Dispensed 0.050000 mL of Octanol  
 [9:12] Initial pH = 7.75  
 [9:12] Iterative adjust 7.75 -> 2.00  
 [9:12] pH 7.75 -> 2.00  
 [9:15] Air gap released for Acid (0.5 M HCl)  
 [9:16] Dispensed 0.096025 mL of Acid (0.5 M HCl)  
 [9:21] Holding pH 2.00  
 [11:21] Stirrer speed set to 0  
 [11:21] Stirrer speed set to 50  
 [11:21] Iterative adjust 1.98 -> 2.00  
 [11:21] pH 1.98 -> 2.00  
 [11:22] Air gap released for Base (0.5 M KOH)  
 [11:22] Dispensed 0.003551 mL of Base (0.5 M KOH)  
 [12:13] Stirrer speed set to 0  
 [12:23] Datapoint id 1 collected  
 [12:23] Stirrer speed set to 50  
 [12:29] pH 2.01 -> 2.21  
 [12:29] Using cautious pH adjust  
 [12:29] Dispensed 0.012159 mL of Base (0.5 M KOH)  
 [12:34] Stepping pH = 2.10  
 [12:34] Dispensed 0.009290 mL of Base (0.5 M KOH)  
 [12:40] Stepping pH = 2.19  
 [12:40] Dispensed 0.001929 mL of Base (0.5 M KOH)  
 [12:45] Stepping pH = 2.22  
 [13:00] Stirrer speed set to 0  
 [13:10] Datapoint id 2 collected  
 [13:10] Charge balance equation is out by 3.9%  
 [13:10] Stirrer speed set to 50

Sample name: **M15\_octanol**  
Assay name: **pH-metric high logP**  
Assay ID: **18C-01004**  
Filename: **C:\Sirius\_T3\Mehtap\20180228\_exp28\_logP\_T3-2\18C-01004\_M15\_octanol\_pH-metric high logP.t3r**

Experiment start time: **3/1/2018 4:33:50 AM**  
Analyst: **Pion**  
Instrument ID: **T312060**

## Experiment Log (continued)

[13:15] pH 2.22 -> 2.42  
[13:15] Using charge balance adjust  
[13:15] Dispensed 0.015828 mL of Base (0.5 M KOH)  
[13:36] Stirrer speed set to 0  
[13:46] Datapoint id 3 collected  
[13:46] Charge balance equation is out by 5.0%  
[13:46] Stirrer speed set to 50  
[13:51] pH 2.44 -> 2.64  
[13:51] Using charge balance adjust  
[13:51] Dispensed 0.010654 mL of Base (0.5 M KOH)  
[14:11] Stirrer speed set to 0  
[14:21] Datapoint id 4 collected  
[14:21] Charge balance equation is out by 4.3%  
[14:21] Stirrer speed set to 50  
[14:26] pH 2.65 -> 2.85  
[14:26] Using charge balance adjust  
[14:27] Dispensed 0.007432 mL of Base (0.5 M KOH)  
[14:47] Stirrer speed set to 0  
[14:57] Datapoint id 5 collected  
[14:57] Charge balance equation is out by 5.6%  
[14:57] Stirrer speed set to 50  
[15:02] pH 2.87 -> 3.07  
[15:02] Using charge balance adjust  
[15:02] Dispensed 0.005221 mL of Base (0.5 M KOH)  
[15:22] Stirrer speed set to 0  
[15:32] Datapoint id 6 collected  
[15:32] Charge balance equation is out by 7.8%  
[15:32] Stirrer speed set to 50  
[15:38] pH 3.09 -> 3.29  
[15:38] Using charge balance adjust  
[15:38] Dispensed 0.003669 mL of Base (0.5 M KOH)  
[15:58] Stirrer speed set to 0  
[16:08] Datapoint id 7 collected  
[16:08] Charge balance equation is out by -10.7%  
[16:08] Stirrer speed set to 50  
[16:13] pH 3.27 -> 3.47  
[16:13] Using charge balance adjust  
[16:13] Dispensed 0.002728 mL of Base (0.5 M KOH)  
[16:33] Stirrer speed set to 0  
[16:43] Datapoint id 8 collected  
[16:43] Charge balance equation is out by 1.1%  
[16:43] Stirrer speed set to 50  
[16:49] pH 3.48 -> 3.68  
[16:49] Using charge balance adjust  
[16:49] Dispensed 0.001999 mL of Base (0.5 M KOH)  
[17:09] Stirrer speed set to 0  
[17:19] Datapoint id 9 collected  
[17:19] Charge balance equation is out by 0.9%  
[17:19] Stirrer speed set to 50  
[17:24] pH 3.69 -> 3.89  
[17:24] Using charge balance adjust  
[17:24] Dispensed 0.001599 mL of Base (0.5 M KOH)  
[17:44] Stirrer speed set to 0  
[17:55] Datapoint id 10 collected  
[17:55] Charge balance equation is out by -8.5%  
[17:55] Stirrer speed set to 50  
[18:00] pH 3.87 -> 4.07  
[18:00] Using charge balance adjust  
[18:00] Dispensed 0.001458 mL of Base (0.5 M KOH)

Sample name: **M15\_octanol**  
Assay name: **pH-metric high logP**  
Assay ID: **18C-01004**  
Filename: **C:\Sirius\_T3\Mehtap\20180228\_exp28\_logP\_T3-2\18C-01004\_M15\_octanol\_pH-metric high logP.t3r**

Experiment start time: **3/1/2018 4:33:50 AM**  
Analyst: **Pion**  
Instrument ID: **T312060**

## Experiment Log (continued)

[18:20] Stirrer speed set to 0  
[18:30] Datapoint id 11 collected  
[18:30] Charge balance equation is out by -23.7%  
[18:30] Stirrer speed set to 50  
[18:35] pH 4.03 -> 4.23  
[18:35] Using cautious pH adjust  
[18:35] Dispensed 0.000729 mL of Base (0.5 M KOH)  
[18:41] Stepping pH = 4.13  
[18:41] Dispensed 0.000564 mL of Base (0.5 M KOH)  
[18:46] Stepping pH = 4.21  
[18:46] Dispensed 0.000118 mL of Base (0.5 M KOH)  
[18:51] Stepping pH = 4.22  
[18:51] Dispensed 0.000094 mL of Base (0.5 M KOH)  
[18:56] Stepping pH = 4.23  
[19:11] Stirrer speed set to 0  
[19:21] Datapoint id 12 collected  
[19:21] Charge balance equation is out by -3.6%  
[19:21] Stirrer speed set to 50  
[19:26] pH 4.23 -> 4.43  
[19:26] Using charge balance adjust  
[19:27] Dispensed 0.001646 mL of Base (0.5 M KOH)  
[19:47] Stirrer speed set to 0  
[19:57] Datapoint id 13 collected  
[19:57] Charge balance equation is out by 33.3%  
[19:57] Stirrer speed set to 50  
[20:02] pH 4.50 -> 4.70  
[20:02] Using cautious pH adjust  
[20:02] Dispensed 0.001011 mL of Base (0.5 M KOH)  
[20:07] Stepping pH = 4.63  
[20:07] Dispensed 0.000447 mL of Base (0.5 M KOH)  
[20:12] Stepping pH = 4.68  
[20:12] Dispensed 0.000118 mL of Base (0.5 M KOH)  
[20:17] Stepping pH = 4.69  
[20:32] Stirrer speed set to 0  
[20:42] Datapoint id 14 collected  
[20:42] Charge balance equation is out by 22.0%  
[20:42] Stirrer speed set to 50  
[20:48] pH 4.69 -> 4.89  
[20:48] Using cautious pH adjust  
[20:48] Dispensed 0.001105 mL of Base (0.5 M KOH)  
[20:53] Stepping pH = 4.82  
[20:53] Dispensed 0.000517 mL of Base (0.5 M KOH)  
[20:58] Stepping pH = 4.87  
[20:58] Dispensed 0.000188 mL of Base (0.5 M KOH)  
[21:03] Stepping pH = 4.88  
[21:18] Stirrer speed set to 0  
[21:29] Datapoint id 15 collected  
[21:29] Charge balance equation is out by 17.8%  
[21:29] Stirrer speed set to 50  
[21:34] pH 4.88 -> 5.08  
[21:34] Using cautious pH adjust  
[21:34] Dispensed 0.001129 mL of Base (0.5 M KOH)  
[21:39] Stepping pH = 4.99  
[21:39] Dispensed 0.000706 mL of Base (0.5 M KOH)  
[21:44] Stepping pH = 5.05  
[21:44] Dispensed 0.000259 mL of Base (0.5 M KOH)  
[21:49] Stepping pH = 5.07  
[22:05] Stirrer speed set to 0  
[22:15] Datapoint id 16 collected

Sample name: **M15\_octanol**  
Assay name: **pH-metric high logP**  
Assay ID: **18C-01004**  
Filename: **C:\Sirius\_T3\Mehtap\20180228\_exp28\_logP\_T3-2\18C-01004\_M15\_octanol\_pH-metric high logP.t3r**

Experiment start time: **3/1/2018 4:33:50 AM**  
Analyst: **Pion**  
Instrument ID: **T312060**

## Experiment Log (continued)

[22:15] Charge balance equation is out by 7.7%  
[22:15] Stirrer speed set to 50  
[22:20] pH 5.07 -> 5.27  
[22:20] Using charge balance adjust  
[22:20] Dispensed 0.002164 mL of Base (0.5 M KOH)  
[22:40] Stirrer speed set to 0  
[22:50] Datapoint id 17 collected  
[22:50] Charge balance equation is out by -8.1%  
[22:50] Stirrer speed set to 50  
[22:55] pH 5.25 -> 5.45  
[22:55] Using charge balance adjust  
[22:55] Dispensed 0.001881 mL of Base (0.5 M KOH)  
[23:15] Stirrer speed set to 0  
[23:26] Datapoint id 18 collected  
[23:26] Charge balance equation is out by 7.2%  
[23:26] Stirrer speed set to 50  
[23:31] pH 5.47 -> 5.67  
[23:31] Using charge balance adjust  
[23:31] Dispensed 0.001482 mL of Base (0.5 M KOH)  
[23:51] Stirrer speed set to 0  
[24:02] Datapoint id 19 collected  
[24:02] Charge balance equation is out by 17.3%  
[24:02] Stirrer speed set to 50  
[24:07] pH 5.71 -> 5.91  
[24:07] Using cautious pH adjust  
[24:07] Dispensed 0.000517 mL of Base (0.5 M KOH)  
[24:12] Stepping pH = 5.80  
[24:12] Dispensed 0.000376 mL of Base (0.5 M KOH)  
[24:17] Stepping pH = 5.90  
[24:17] Dispensed 0.000047 mL of Base (0.5 M KOH)  
[24:22] Stepping pH = 5.90  
[24:37] Stirrer speed set to 0  
[24:47] Datapoint id 20 collected  
[24:47] Charge balance equation is out by 10.0%  
[24:47] Stirrer speed set to 50  
[24:52] pH 5.90 -> 6.10  
[24:52] Using charge balance adjust  
[24:52] Dispensed 0.000753 mL of Base (0.5 M KOH)  
[25:13] Stirrer speed set to 0  
[25:24] Datapoint id 21 collected  
[25:24] Charge balance equation is out by 24.3%  
[25:24] Stirrer speed set to 50  
[25:29] pH 6.15 -> 6.35  
[25:29] Using cautious pH adjust  
[25:29] Dispensed 0.000235 mL of Base (0.5 M KOH)  
[25:34] Stepping pH = 6.23  
[25:34] Dispensed 0.000235 mL of Base (0.5 M KOH)  
[25:39] Stepping pH = 6.35  
[25:55] Stirrer speed set to 0  
[26:11] Datapoint id 22 collected  
[26:11] Charge balance equation is out by 3.5%  
[26:11] Stirrer speed set to 50  
[26:16] pH 6.36 -> 6.56  
[26:16] Using charge balance adjust  
[26:16] Dispensed 0.000329 mL of Base (0.5 M KOH)  
[26:36] Stirrer speed set to 0  
[26:57] Datapoint id 23 collected  
[26:57] Charge balance equation is out by -39.1%  
[26:57] Stirrer speed set to 50



Sample name: **M15\_octanol**  
Assay name: **pH-metric high logP**  
Assay ID: **18C-01004**  
Filename: **C:\Sirius\_T3\Mehtap\20180228\_exp28\_logP\_T3-2\18C-01004\_M15\_octanol\_pH-metric high logP.t3r**

Experiment start time: **3/1/2018 4:33:50 AM**  
Analyst: **Pion**  
Instrument ID: **T312060**

## Experiment Log (continued)

[27:02] pH 6.48 -> 6.68  
[27:02] Using cautious pH adjust  
[27:02] Dispensed 0.000118 mL of Base (0.5 M KOH)  
[27:07] Stepping pH = 6.53  
[27:07] Dispensed 0.000188 mL of Base (0.5 M KOH)  
[27:12] Stepping pH = 6.72  
[27:27] Stirrer speed set to 0  
[27:52] Datapoint id 24 collected  
[27:52] Charge balance equation is out by -27.4%  
[27:52] Stirrer speed set to 50  
[27:57] pH 6.75 -> 6.95  
[27:57] Using cautious pH adjust  
[27:57] Dispensed 0.000071 mL of Base (0.5 M KOH)  
[28:02] Stepping pH = 6.77  
[28:03] Dispensed 0.000212 mL of Base (0.5 M KOH)  
[28:08] Stepping pH = 7.07  
[28:23] Stirrer speed set to 0  
[29:13] Datapoint id 25 collected  
[29:13] Charge balance equation is out by -83.1%  
[29:13] Stirrer speed set to 50  
[29:18] pH 7.12 -> 7.32  
[29:18] Using cautious pH adjust  
[29:18] Dispensed 0.000024 mL of Base (0.5 M KOH)  
[29:24] Stepping pH = 7.13  
[29:24] Dispensed 0.000094 mL of Base (0.5 M KOH)  
[29:29] Stepping pH = 7.23  
[29:29] Dispensed 0.000047 mL of Base (0.5 M KOH)  
[29:34] Stepping pH = 7.42  
[29:49] Stirrer speed set to 0  
[30:49] Datapoint id 26 collected  
[30:49] Charge balance equation is out by -166.1%  
[30:49] Stirrer speed set to 50  
[30:54] pH 7.49 -> 7.69  
[30:54] Using cautious pH adjust  
[30:54] Dispensed 0.000024 mL of Base (0.5 M KOH)  
[30:59] Stepping pH = 7.55  
[30:59] Dispensed 0.000024 mL of Base (0.5 M KOH)  
[31:04] Stepping pH = 7.61  
[31:04] Dispensed 0.000024 mL of Base (0.5 M KOH)  
[31:10] Stepping pH = 7.74  
[31:25] Stirrer speed set to 0  
[32:25] Datapoint id 27 collected  
[32:25] Charge balance equation is out by -89.7%  
[32:25] Stirrer speed set to 50  
[32:30] pH 7.81 -> 8.01  
[32:30] Using cautious pH adjust  
[32:30] Dispensed 0.000024 mL of Base (0.5 M KOH)  
[32:35] Stepping pH = 7.86  
[32:35] Dispensed 0.000024 mL of Base (0.5 M KOH)  
[32:40] Stepping pH = 7.97  
[32:40] Dispensed 0.000024 mL of Base (0.5 M KOH)  
[32:45] Stepping pH = 8.12  
[33:00] Stirrer speed set to 0  
[33:52] Datapoint id 28 collected  
[33:52] Charge balance equation is out by -214.6%  
[33:52] Stirrer speed set to 50  
[33:57] pH 8.22 -> 8.42  
[33:57] Using cautious pH adjust  
[33:57] Dispensed 0.000024 mL of Base (0.5 M KOH)

Sample name: **M15\_octanol**  
Assay name: **pH-metric high logP**  
Assay ID: **18C-01004**  
Filename: **C:\Sirius\_T3\Mehtap\20180228\_exp28\_logP\_T3-2\18C-01004\_M15\_octanol\_pH-metric high logP.t3r**

Experiment start time: **3/1/2018 4:33:50 AM**  
Analyst: **Pion**  
Instrument ID: **T312060**

## Experiment Log (continued)

[34:02] Stepping pH = 8.27  
[34:02] Dispensed 0.000024 mL of Base (0.5 M KOH)  
[34:07] Stepping pH = 8.37  
[34:07] Dispensed 0.000024 mL of Base (0.5 M KOH)  
[34:12] Stepping pH = 8.48  
[34:27] Stirrer speed set to 0  
[35:15] Datapoint id 29 collected  
[35:15] Charge balance equation is out by -257.9%  
[35:15] Stirrer speed set to 50  
[35:20] pH 8.53 -> 8.73  
[35:20] Using cautious pH adjust  
[35:20] Dispensed 0.000024 mL of Base (0.5 M KOH)  
[35:25] Stepping pH = 8.56  
[35:25] Dispensed 0.000024 mL of Base (0.5 M KOH)  
[35:30] Stepping pH = 8.62  
[35:30] Dispensed 0.000024 mL of Base (0.5 M KOH)  
[35:35] Stepping pH = 8.68  
[35:35] Dispensed 0.000024 mL of Base (0.5 M KOH)  
[35:40] Stepping pH = 8.74  
[35:55] Stirrer speed set to 0  
[36:13] Datapoint id 30 collected  
[36:13] Charge balance equation is out by -326.8%  
[36:13] Stirrer speed set to 50  
[36:18] pH 8.76 -> 8.96  
[36:18] Using cautious pH adjust  
[36:18] Dispensed 0.000024 mL of Base (0.5 M KOH)  
[36:24] Stepping pH = 8.78  
[36:24] Dispensed 0.000047 mL of Base (0.5 M KOH)  
[36:29] Stepping pH = 8.83  
[36:29] Dispensed 0.000071 mL of Base (0.5 M KOH)  
[36:34] Stepping pH = 8.95  
[36:34] Dispensed 0.000024 mL of Base (0.5 M KOH)  
[36:39] Stepping pH = 9.00  
[36:54] Stirrer speed set to 0  
[37:24] Datapoint id 31 collected  
[37:24] Charge balance equation is out by -326.2%  
[37:24] Stirrer speed set to 50  
[37:29] pH 9.02 -> 9.22  
[37:29] Using cautious pH adjust  
[37:29] Dispensed 0.000024 mL of Base (0.5 M KOH)  
[37:34] Stepping pH = 9.03  
[37:34] Dispensed 0.000094 mL of Base (0.5 M KOH)  
[37:39] Stepping pH = 9.14  
[37:39] Dispensed 0.000047 mL of Base (0.5 M KOH)  
[37:44] Stepping pH = 9.23  
[38:00] Stirrer speed set to 0  
[38:24] Datapoint id 32 collected  
[38:24] Charge balance equation is out by -182.2%  
[38:24] Stirrer speed set to 50  
[38:29] pH 9.24 -> 9.44  
[38:29] Using cautious pH adjust  
[38:29] Dispensed 0.000047 mL of Base (0.5 M KOH)  
[38:34] Stepping pH = 9.26  
[38:34] Dispensed 0.000141 mL of Base (0.5 M KOH)  
[38:40] Stepping pH = 9.43  
[38:40] Dispensed 0.000024 mL of Base (0.5 M KOH)  
[38:45] Stepping pH = 9.47  
[39:00] Stirrer speed set to 0  
[39:14] Datapoint id 33 collected



Sample name: **M15\_octanol**  
 Assay name: **pH-metric high logP**  
 Assay ID: **18C-01004**  
 Filename: **C:\Sirius\_T3\Mehtap\20180228\_exp28\_logP\_T3-2\18C-01004\_M15\_octanol\_pH-metric high logP.t3r**

Experiment start time: **3/1/2018 4:33:50 AM**  
 Analyst: **Pion**  
 Instrument ID: **T312060**

## Experiment Log (continued)

[39:14] Charge balance equation is out by -108.6%  
 [39:14] Stirrer speed set to 50  
 [39:19] pH 9.49 -> 9.69  
 [39:19] Using cautious pH adjust  
 [39:19] Dispensed 0.000071 mL of Base (0.5 M KOH)  
 [39:24] Stepping pH = 9.51  
 [39:24] Dispensed 0.000212 mL of Base (0.5 M KOH)  
 [39:29] Stepping pH = 9.72  
 [39:45] Stirrer speed set to 0  
 [39:58] Datapoint id 34 collected  
 [39:58] Charge balance equation is out by -84.8%  
 [39:58] Stirrer speed set to 50  
 [40:03] pH 9.73 -> 9.93  
 [40:03] Using cautious pH adjust  
 [40:03] Dispensed 0.000141 mL of Base (0.5 M KOH)  
 [40:08] Stepping pH = 9.80  
 [40:08] Dispensed 0.000165 mL of Base (0.5 M KOH)  
 [40:13] Stepping pH = 9.90  
 [40:13] Dispensed 0.000047 mL of Base (0.5 M KOH)  
 [40:18] Stepping pH = 9.93  
 [40:33] Stirrer speed set to 0  
 [40:44] Datapoint id 35 collected  
 [40:44] Charge balance equation is out by -29.7%  
 [40:44] Stirrer speed set to 50  
 [40:49] pH 9.93 -> 10.05  
 [40:49] Using cautious pH adjust  
 [40:49] Dispensed 0.000118 mL of Base (0.5 M KOH)  
 [40:55] Stepping pH = 9.97  
 [40:55] Dispensed 0.000141 mL of Base (0.5 M KOH)  
 [41:00] Stepping pH = 10.04  
 [41:15] Stirrer speed set to 0  
 [41:25] Datapoint id 36 collected  
 [41:25] Charge balance equation is out by -12.1%  
 [41:25] Titration 2 of 3  
 [41:25] Adding initial titrants  
 [41:25] Automatically add 0.10000 mL of Octanol  
 [41:27] Dispensed 0.100000 mL of Octanol  
 [41:27] Stirrer speed set to 10  
 [41:28] Stirrer speed set to 55  
 [41:28] Iterative adjust 10.05 -> 2.00  
 [41:28] pH 10.05 -> 2.00  
 [41:31] Dispensed 0.100000 mL of Acid (0.5 M HCl)  
 [41:36] pH 2.03 -> 2.00  
 [41:36] Dispensed 0.004680 mL of Acid (0.5 M HCl)  
 [42:26] Stirrer speed set to 0  
 [42:36] Datapoint id 37 collected  
 [42:36] Stirrer speed set to 55  
 [42:42] pH 1.96 -> 2.16  
 [42:42] Using cautious pH adjust  
 [42:42] Dispensed 0.014675 mL of Base (0.5 M KOH)  
 [42:47] Stepping pH = 2.05  
 [42:48] Dispensed 0.010466 mL of Base (0.5 M KOH)  
 [42:53] Stepping pH = 2.14  
 [42:53] Dispensed 0.002046 mL of Base (0.5 M KOH)  
 [42:58] Stepping pH = 2.17  
 [43:13] Stirrer speed set to 0  
 [43:23] Datapoint id 38 collected  
 [43:23] Charge balance equation is out by 7.4%  
 [43:23] Stirrer speed set to 55

Sample name: **M15\_octanol**  
Assay name: **pH-metric high logP**  
Assay ID: **18C-01004**  
Filename: **C:\Sirius\_T3\Mehtap\20180228\_exp28\_logP\_T3-2\18C-01004\_M15\_octanol\_pH-metric high logP.t3r**

Experiment start time: **3/1/2018 4:33:50 AM**  
Analyst: **Pion**  
Instrument ID: **T312060**

## Experiment Log (continued)

[43:28] pH 2.17 -> 2.37  
[43:28] Using charge balance adjust  
[43:29] Dispensed 0.018932 mL of Base (0.5 M KOH)  
[43:49] Stirrer speed set to 0  
[43:59] Datapoint id 39 collected  
[43:59] Charge balance equation is out by 7.7%  
[43:59] Stirrer speed set to 55  
[44:04] pH 2.39 -> 2.59  
[44:04] Using charge balance adjust  
[44:05] Dispensed 0.012441 mL of Base (0.5 M KOH)  
[44:25] Stirrer speed set to 0  
[44:35] Datapoint id 40 collected  
[44:35] Charge balance equation is out by 8.0%  
[44:35] Stirrer speed set to 55  
[44:40] pH 2.61 -> 2.81  
[44:40] Using charge balance adjust  
[44:40] Dispensed 0.008467 mL of Base (0.5 M KOH)  
[45:00] Stirrer speed set to 0  
[45:10] Datapoint id 41 collected  
[45:10] Charge balance equation is out by 6.4%  
[45:10] Stirrer speed set to 55  
[45:15] pH 2.83 -> 3.03  
[45:15] Using charge balance adjust  
[45:16] Dispensed 0.005950 mL of Base (0.5 M KOH)  
[45:36] Stirrer speed set to 0  
[45:46] Datapoint id 42 collected  
[45:46] Charge balance equation is out by 10.4%  
[45:46] Stirrer speed set to 55  
[45:51] pH 3.06 -> 3.26  
[45:51] Using charge balance adjust  
[45:51] Dispensed 0.004186 mL of Base (0.5 M KOH)  
[46:11] Stirrer speed set to 0  
[46:21] Datapoint id 43 collected  
[46:21] Charge balance equation is out by -2.9%  
[46:21] Stirrer speed set to 55  
[46:26] pH 3.26 -> 3.46  
[46:26] Using charge balance adjust  
[46:27] Dispensed 0.003128 mL of Base (0.5 M KOH)  
[46:47] Stirrer speed set to 0  
[46:57] Datapoint id 44 collected  
[46:57] Charge balance equation is out by 9.8%  
[46:57] Stirrer speed set to 55  
[47:02] pH 3.48 -> 3.68  
[47:02] Using charge balance adjust  
[47:02] Dispensed 0.002399 mL of Base (0.5 M KOH)  
[47:22] Stirrer speed set to 0  
[47:33] Datapoint id 45 collected  
[47:33] Charge balance equation is out by -4.0%  
[47:33] Stirrer speed set to 55  
[47:38] pH 3.68 -> 3.88  
[47:38] Using charge balance adjust  
[47:38] Dispensed 0.002093 mL of Base (0.5 M KOH)  
[47:58] Stirrer speed set to 0  
[48:09] Datapoint id 46 collected  
[48:09] Charge balance equation is out by -4.6%  
[48:09] Stirrer speed set to 55  
[48:14] pH 3.87 -> 4.07  
[48:14] Using charge balance adjust  
[48:14] Dispensed 0.002023 mL of Base (0.5 M KOH)

Sample name: **M15\_octanol**  
Assay name: **pH-metric high logP**  
Assay ID: **18C-01004**  
Filename: **C:\Sirius\_T3\Mehtap\20180228\_exp28\_logP\_T3-2\18C-01004\_M15\_octanol\_pH-metric high logP.t3r**

Experiment start time: **3/1/2018 4:33:50 AM**  
Analyst: **Pion**  
Instrument ID: **T312060**

## Experiment Log (continued)

[48:34] Stirrer speed set to 0  
[48:44] Datapoint id 47 collected  
[48:44] Charge balance equation is out by 0.6%  
[48:44] Stirrer speed set to 55  
[48:49] pH 4.07 -> 4.27  
[48:49] Using charge balance adjust  
[48:50] Dispensed 0.002140 mL of Base (0.5 M KOH)  
[49:10] Stirrer speed set to 0  
[49:20] Datapoint id 48 collected  
[49:20] Charge balance equation is out by 22.9%  
[49:20] Stirrer speed set to 55  
[49:25] pH 4.32 -> 4.52  
[49:25] Using cautious pH adjust  
[49:25] Dispensed 0.001176 mL of Base (0.5 M KOH)  
[49:31] Stepping pH = 4.44  
[49:31] Dispensed 0.000635 mL of Base (0.5 M KOH)  
[49:36] Stepping pH = 4.51  
[49:36] Dispensed 0.000141 mL of Base (0.5 M KOH)  
[49:41] Stepping pH = 4.52  
[49:56] Stirrer speed set to 0  
[50:06] Datapoint id 49 collected  
[50:06] Charge balance equation is out by 16.8%  
[50:06] Stirrer speed set to 55  
[50:11] pH 4.51 -> 4.71  
[50:11] Using cautious pH adjust  
[50:11] Dispensed 0.001176 mL of Base (0.5 M KOH)  
[50:16] Stepping pH = 4.61  
[50:16] Dispensed 0.000800 mL of Base (0.5 M KOH)  
[50:22] Stepping pH = 4.68  
[50:22] Dispensed 0.000212 mL of Base (0.5 M KOH)  
[50:27] Stepping pH = 4.70  
[50:27] Dispensed 0.000141 mL of Base (0.5 M KOH)  
[50:32] Stepping pH = 4.70  
[50:47] Stirrer speed set to 0  
[50:57] Datapoint id 50 collected  
[50:57] Charge balance equation is out by 1.4%  
[50:57] Stirrer speed set to 55  
[51:02] pH 4.69 -> 4.89  
[51:02] Using charge balance adjust  
[51:02] Dispensed 0.002258 mL of Base (0.5 M KOH)  
[51:23] Stirrer speed set to 0  
[51:33] Datapoint id 51 collected  
[51:33] Charge balance equation is out by 4.7%  
[51:33] Stirrer speed set to 55  
[51:38] pH 4.90 -> 5.10  
[51:38] Using charge balance adjust  
[51:38] Dispensed 0.001952 mL of Base (0.5 M KOH)  
[51:58] Stirrer speed set to 0  
[52:09] Datapoint id 52 collected  
[52:09] Charge balance equation is out by 16.1%  
[52:09] Stirrer speed set to 55  
[52:14] pH 5.14 -> 5.34  
[52:14] Using cautious pH adjust  
[52:14] Dispensed 0.000753 mL of Base (0.5 M KOH)  
[52:19] Stepping pH = 5.25  
[52:19] Dispensed 0.000447 mL of Base (0.5 M KOH)  
[52:24] Stepping pH = 5.32  
[52:24] Dispensed 0.000094 mL of Base (0.5 M KOH)  
[52:29] Stepping pH = 5.33

Sample name: **M15\_octanol**  
Assay name: **pH-metric high logP**  
Assay ID: **18C-01004**  
Filename: **C:\Sirius\_T3\Mehtap\20180228\_exp28\_logP\_T3-2\18C-01004\_M15\_octanol\_pH-metric high logP.t3r**

Experiment start time: **3/1/2018 4:33:50 AM**  
Analyst: **Pion**  
Instrument ID: **T312060**

## Experiment Log (continued)

[52:44] Stirrer speed set to 0  
[52:55] Datapoint id 53 collected  
[52:55] Charge balance equation is out by 13.9%  
[52:55] Stirrer speed set to 55  
[53:00] pH 5.33 -> 5.53  
[53:00] Using charge balance adjust  
[53:00] Dispensed 0.001129 mL of Base (0.5 M KOH)  
[53:20] Stirrer speed set to 0  
[53:30] Datapoint id 54 collected  
[53:30] Charge balance equation is out by 23.2%  
[53:30] Stirrer speed set to 55  
[53:35] pH 5.58 -> 5.78  
[53:35] Using cautious pH adjust  
[53:35] Dispensed 0.000376 mL of Base (0.5 M KOH)  
[53:41] Stepping pH = 5.67  
[53:41] Dispensed 0.000282 mL of Base (0.5 M KOH)  
[53:46] Stepping pH = 5.77  
[54:01] Stirrer speed set to 0  
[54:11] Datapoint id 55 collected  
[54:11] Charge balance equation is out by 11.5%  
[54:11] Stirrer speed set to 55  
[54:16] pH 5.77 -> 5.97  
[54:16] Using charge balance adjust  
[54:16] Dispensed 0.000517 mL of Base (0.5 M KOH)  
[54:37] Stirrer speed set to 0  
[54:49] Datapoint id 56 collected  
[54:49] Charge balance equation is out by 10.2%  
[54:49] Stirrer speed set to 55  
[54:54] pH 6.00 -> 6.20  
[54:54] Using charge balance adjust  
[54:54] Dispensed 0.000353 mL of Base (0.5 M KOH)  
[55:15] Stirrer speed set to 0  
[55:30] Datapoint id 57 collected  
[55:30] Charge balance equation is out by -5.4%  
[55:30] Stirrer speed set to 55  
[55:35] pH 6.21 -> 6.41  
[55:35] Using charge balance adjust  
[55:35] Dispensed 0.000259 mL of Base (0.5 M KOH)  
[55:55] Stirrer speed set to 0  
[56:27] Datapoint id 58 collected  
[56:27] Charge balance equation is out by 31.8%  
[56:27] Stirrer speed set to 55  
[56:32] pH 6.50 -> 6.70  
[56:32] Using cautious pH adjust  
[56:32] Dispensed 0.000071 mL of Base (0.5 M KOH)  
[56:37] Stepping pH = 6.51  
[56:37] Dispensed 0.000212 mL of Base (0.5 M KOH)  
[56:42] Stepping pH = 6.96  
[56:58] Stirrer speed set to 0  
[57:58] Datapoint id 59 collected  
[57:58] Charge balance equation is out by -84.9%  
[57:58] Stirrer speed set to 55  
[58:03] pH 6.98 -> 7.18  
[58:03] Using cautious pH adjust  
[58:03] Dispensed 0.000024 mL of Base (0.5 M KOH)  
[58:08] Stepping pH = 7.01  
[58:08] Dispensed 0.000071 mL of Base (0.5 M KOH)  
[58:13] Stepping pH = 7.02  
[58:13] Dispensed 0.000165 mL of Base (0.5 M KOH)

Sample name: **M15\_octanol**  
Assay name: **pH-metric high logP**  
Assay ID: **18C-01004**  
Filename: **C:\Sirius\_T3\Mehtap\20180228\_exp28\_logP\_T3-2\18C-01004\_M15\_octanol\_pH-metric high logP.t3r**

Experiment start time: **3/1/2018 4:33:50 AM**  
Analyst: **Pion**  
Instrument ID: **T312060**

## Experiment Log (continued)

[58:18] Stepping pH = 7.94  
[58:33] Stirrer speed set to 0  
[59:33] Datapoint id 60 collected  
[59:33] Charge balance equation is out by -331.1%  
[59:33] Stirrer speed set to 55  
[59:39] pH 8.01 -> 8.21  
[59:39] Using cautious pH adjust  
[59:39] Dispensed 0.000024 mL of Base (0.5 M KOH)  
[59:44] Stepping pH = 8.02  
[59:44] Dispensed 0.000024 mL of Base (0.5 M KOH)  
[59:49] Stepping pH = 8.02  
[59:49] Dispensed 0.000094 mL of Base (0.5 M KOH)  
[59:54] Stepping pH = 8.25  
[1:00:09] Stirrer speed set to 0  
[1:01:08] Datapoint id 61 collected  
[1:01:08] Charge balance equation is out by -895.9%  
[1:01:08] Stirrer speed set to 55  
[1:01:13] pH 8.29 -> 8.49  
[1:01:13] Using cautious pH adjust  
[1:01:13] Dispensed 0.000024 mL of Base (0.5 M KOH)  
[1:01:18] Stepping pH = 8.30  
[1:01:19] Dispensed 0.000024 mL of Base (0.5 M KOH)  
[1:01:24] Stepping pH = 8.31  
[1:01:24] Dispensed 0.000071 mL of Base (0.5 M KOH)  
[1:01:29] Stepping pH = 8.46  
[1:01:29] Dispensed 0.000024 mL of Base (0.5 M KOH)  
[1:01:34] Stepping pH = 8.51  
[1:01:49] Stirrer speed set to 0  
[1:02:21] Datapoint id 62 collected  
[1:02:21] Charge balance equation is out by -675.6%  
[1:02:21] Stirrer speed set to 55  
[1:02:26] pH 8.53 -> 8.73  
[1:02:26] Using cautious pH adjust  
[1:02:26] Dispensed 0.000024 mL of Base (0.5 M KOH)  
[1:02:31] Stepping pH = 8.55  
[1:02:31] Dispensed 0.000024 mL of Base (0.5 M KOH)  
[1:02:36] Stepping pH = 8.59  
[1:02:36] Dispensed 0.000071 mL of Base (0.5 M KOH)  
[1:02:41] Stepping pH = 8.73  
[1:02:56] Stirrer speed set to 0  
[1:03:24] Datapoint id 63 collected  
[1:03:24] Charge balance equation is out by -363.9%  
[1:03:24] Stirrer speed set to 55  
[1:03:29] pH 8.75 -> 8.95  
[1:03:29] Using cautious pH adjust  
[1:03:29] Dispensed 0.000024 mL of Base (0.5 M KOH)  
[1:03:34] Stepping pH = 8.77  
[1:03:35] Dispensed 0.000047 mL of Base (0.5 M KOH)  
[1:03:40] Stepping pH = 8.81  
[1:03:40] Dispensed 0.000094 mL of Base (0.5 M KOH)  
[1:03:45] Stepping pH = 8.88  
[1:03:45] Dispensed 0.000071 mL of Base (0.5 M KOH)  
[1:03:50] Stepping pH = 8.94  
[1:04:05] Stirrer speed set to 0  
[1:04:20] Datapoint id 64 collected  
[1:04:20] Charge balance equation is out by -534.8%  
[1:04:20] Stirrer speed set to 55  
[1:04:25] pH 8.96 -> 9.16  
[1:04:25] Using cautious pH adjust

Sample name: **M15\_octanol**  
Assay name: **pH-metric high logP**  
Assay ID: **18C-01004**  
Filename: **C:\Sirius\_T3\Mehtap\20180228\_exp28\_logP\_T3-2\18C-01004\_M15\_octanol\_pH-metric high logP.t3r**

Experiment start time: **3/1/2018 4:33:50 AM**  
Analyst: **Pion**  
Instrument ID: **T312060**

## Experiment Log (continued)

[1:04:25] Dispensed 0.000024 mL of Base (0.5 M KOH)  
[1:04:30] Stepping pH = 8.97  
[1:04:30] Dispensed 0.000094 mL of Base (0.5 M KOH)  
[1:04:35] Stepping pH = 8.99  
[1:04:35] Dispensed 0.000235 mL of Base (0.5 M KOH)  
[1:04:40] Stepping pH = 9.25  
[1:04:55] Stirrer speed set to 0  
[1:05:18] Datapoint id 65 collected  
[1:05:18] Charge balance equation is out by -466.4%  
[1:05:18] Stirrer speed set to 55  
[1:05:23] pH 9.28 -> 9.48  
[1:05:23] Using cautious pH adjust  
[1:05:23] Dispensed 0.000047 mL of Base (0.5 M KOH)  
[1:05:28] Stepping pH = 9.28  
[1:05:28] Dispensed 0.000165 mL of Base (0.5 M KOH)  
[1:05:33] Stepping pH = 9.42  
[1:05:33] Dispensed 0.000071 mL of Base (0.5 M KOH)  
[1:05:38] Stepping pH = 9.47  
[1:05:54] Stirrer speed set to 0  
[1:06:07] Datapoint id 66 collected  
[1:06:07] Charge balance equation is out by -157.2%  
[1:06:07] Stirrer speed set to 55  
[1:06:12] pH 9.48 -> 9.68  
[1:06:12] Using cautious pH adjust  
[1:06:12] Dispensed 0.000094 mL of Base (0.5 M KOH)  
[1:06:17] Stepping pH = 9.51  
[1:06:17] Dispensed 0.000212 mL of Base (0.5 M KOH)  
[1:06:23] Stepping pH = 9.69  
[1:06:38] Stirrer speed set to 0  
[1:06:49] Datapoint id 67 collected  
[1:06:49] Charge balance equation is out by -70.6%  
[1:06:49] Stirrer speed set to 55  
[1:06:54] pH 9.71 -> 9.91  
[1:06:54] Using cautious pH adjust  
[1:06:54] Dispensed 0.000141 mL of Base (0.5 M KOH)  
[1:06:59] Stepping pH = 9.75  
[1:06:59] Dispensed 0.000259 mL of Base (0.5 M KOH)  
[1:07:04] Stepping pH = 9.91  
[1:07:19] Stirrer speed set to 0  
[1:07:30] Datapoint id 68 collected  
[1:07:30] Charge balance equation is out by -45.5%  
[1:07:30] Stirrer speed set to 55  
[1:07:35] pH 9.92 -> 10.05  
[1:07:35] Using cautious pH adjust  
[1:07:35] Dispensed 0.000118 mL of Base (0.5 M KOH)  
[1:07:40] Stepping pH = 9.94  
[1:07:40] Dispensed 0.000306 mL of Base (0.5 M KOH)  
[1:07:45] Stepping pH = 10.09  
[1:08:00] Stirrer speed set to 0  
[1:08:14] Datapoint id 69 collected  
[1:08:14] Charge balance equation is out by -72.3%  
[1:08:14] Titration 3 of 3  
[1:08:14] Adding initial titrants  
[1:08:14] Automatically add 0.30000 mL of Octanol  
[1:08:21] Dispensed 0.300000 mL of Octanol  
[1:08:21] Stirrer speed set to 10  
[1:08:22] Stirrer speed set to 60  
[1:08:22] Iterative adjust 10.10 -> 2.00  
[1:08:22] pH 10.10 -> 2.00



Sample name: **M15\_octanol**  
Assay name: **pH-metric high logP**  
Assay ID: **18C-01004**  
Filename: **C:\Sirius\_T3\Mehtap\20180228\_exp28\_logP\_T3-2\18C-01004\_M15\_octanol\_pH-metric high logP.t3r**

Experiment start time: **3/1/2018 4:33:50 AM**  
Analyst: **Pion**  
Instrument ID: **T312060**

## Experiment Log (continued)

[1:08:24] Dispensed 0.100000 mL of Acid (0.5 M HCl)  
[1:08:30] pH 2.04 -> 2.00  
[1:08:30] Dispensed 0.006326 mL of Acid (0.5 M HCl)  
[1:09:20] Stirrer speed set to 0  
[1:09:30] Datapoint id 70 collected  
[1:09:30] Stirrer speed set to 60  
[1:09:35] pH 1.99 -> 2.19  
[1:09:35] Using cautious pH adjust  
[1:09:36] Dispensed 0.015052 mL of Base (0.5 M KOH)  
[1:09:41] Stepping pH = 2.08  
[1:09:41] Dispensed 0.010818 mL of Base (0.5 M KOH)  
[1:09:46] Stepping pH = 2.16  
[1:09:46] Dispensed 0.002375 mL of Base (0.5 M KOH)  
[1:09:52] Stepping pH = 2.19  
[1:10:07] Stirrer speed set to 0  
[1:10:17] Datapoint id 71 collected  
[1:10:17] Charge balance equation is out by 6.2%  
[1:10:17] Stirrer speed set to 60  
[1:10:22] pH 2.19 -> 2.39  
[1:10:22] Using charge balance adjust  
[1:10:22] Dispensed 0.019450 mL of Base (0.5 M KOH)  
[1:10:43] Stirrer speed set to 0  
[1:10:53] Datapoint id 72 collected  
[1:10:53] Charge balance equation is out by 9.2%  
[1:10:53] Stirrer speed set to 60  
[1:10:58] pH 2.41 -> 2.61  
[1:10:58] Using charge balance adjust  
[1:10:59] Dispensed 0.012794 mL of Base (0.5 M KOH)  
[1:11:19] Stirrer speed set to 0  
[1:11:29] Datapoint id 73 collected  
[1:11:29] Charge balance equation is out by 13.1%  
[1:11:29] Stirrer speed set to 60  
[1:11:34] pH 2.64 -> 2.84  
[1:11:34] Using charge balance adjust  
[1:11:34] Dispensed 0.008655 mL of Base (0.5 M KOH)  
[1:11:54] Stirrer speed set to 0  
[1:12:05] Datapoint id 74 collected  
[1:12:05] Charge balance equation is out by 9.7%  
[1:12:05] Stirrer speed set to 60  
[1:12:10] pH 2.87 -> 3.07  
[1:12:10] Using charge balance adjust  
[1:12:10] Dispensed 0.006138 mL of Base (0.5 M KOH)  
[1:12:30] Stirrer speed set to 0  
[1:12:40] Datapoint id 75 collected  
[1:12:40] Charge balance equation is out by 5.4%  
[1:12:40] Stirrer speed set to 60  
[1:12:45] pH 3.09 -> 3.29  
[1:12:45] Using charge balance adjust  
[1:12:45] Dispensed 0.004563 mL of Base (0.5 M KOH)  
[1:13:06] Stirrer speed set to 0  
[1:13:16] Datapoint id 76 collected  
[1:13:16] Charge balance equation is out by 6.3%  
[1:13:16] Stirrer speed set to 60  
[1:13:21] pH 3.30 -> 3.50  
[1:13:21] Using charge balance adjust  
[1:13:21] Dispensed 0.003575 mL of Base (0.5 M KOH)  
[1:13:41] Stirrer speed set to 0  
[1:13:51] Datapoint id 77 collected  
[1:13:51] Charge balance equation is out by 2.0%

Sample name: **M15\_octanol**  
Assay name: **pH-metric high logP**  
Assay ID: **18C-01004**  
Filename: **C:\Sirius\_T3\Mehtap\20180228\_exp28\_logP\_T3-2\18C-01004\_M15\_octanol\_pH-metric high logP.t3r**

Experiment start time: **3/1/2018 4:33:50 AM**  
Analyst: **Pion**  
Instrument ID: **T312060**

## Experiment Log (continued)

[1:13:51] Stirrer speed set to 60  
[1:13:56] pH 3.51 -> 3.71  
[1:13:56] Using charge balance adjust  
[1:13:57] Dispensed 0.003057 mL of Base (0.5 M KOH)  
[1:14:17] Stirrer speed set to 0  
[1:14:27] Datapoint id 78 collected  
[1:14:27] Charge balance equation is out by 10.2%  
[1:14:27] Stirrer speed set to 60  
[1:14:32] pH 3.73 -> 3.93  
[1:14:32] Using charge balance adjust  
[1:14:32] Dispensed 0.002846 mL of Base (0.5 M KOH)  
[1:14:52] Stirrer speed set to 0  
[1:15:03] Datapoint id 79 collected  
[1:15:03] Charge balance equation is out by 26.2%  
[1:15:03] Stirrer speed set to 60  
[1:15:08] pH 3.98 -> 4.18  
[1:15:08] Using cautious pH adjust  
[1:15:08] Dispensed 0.001364 mL of Base (0.5 M KOH)  
[1:15:13] Stepping pH = 4.08  
[1:15:13] Dispensed 0.000894 mL of Base (0.5 M KOH)  
[1:15:18] Stepping pH = 4.16  
[1:15:18] Dispensed 0.000165 mL of Base (0.5 M KOH)  
[1:15:23] Stepping pH = 4.17  
[1:15:39] Stirrer speed set to 0  
[1:15:49] Datapoint id 80 collected  
[1:15:49] Charge balance equation is out by 10.9%  
[1:15:49] Stirrer speed set to 60  
[1:15:54] pH 4.16 -> 4.36  
[1:15:54] Using charge balance adjust  
[1:15:54] Dispensed 0.002634 mL of Base (0.5 M KOH)  
[1:16:14] Stirrer speed set to 0  
[1:16:24] Datapoint id 81 collected  
[1:16:24] Charge balance equation is out by 15.1%  
[1:16:24] Stirrer speed set to 60  
[1:16:29] pH 4.38 -> 4.58  
[1:16:29] Using cautious pH adjust  
[1:16:29] Dispensed 0.001152 mL of Base (0.5 M KOH)  
[1:16:34] Stepping pH = 4.48  
[1:16:34] Dispensed 0.000753 mL of Base (0.5 M KOH)  
[1:16:40] Stepping pH = 4.57  
[1:16:55] Stirrer speed set to 0  
[1:17:05] Datapoint id 82 collected  
[1:17:05] Charge balance equation is out by 17.4%  
[1:17:05] Stirrer speed set to 60  
[1:17:10] pH 4.56 -> 4.76  
[1:17:10] Using cautious pH adjust  
[1:17:10] Dispensed 0.000964 mL of Base (0.5 M KOH)  
[1:17:16] Stepping pH = 4.67  
[1:17:16] Dispensed 0.000611 mL of Base (0.5 M KOH)  
[1:17:21] Stepping pH = 4.74  
[1:17:21] Dispensed 0.000141 mL of Base (0.5 M KOH)  
[1:17:26] Stepping pH = 4.76  
[1:17:41] Stirrer speed set to 0  
[1:17:52] Datapoint id 83 collected  
[1:17:52] Charge balance equation is out by 12.3%  
[1:17:52] Stirrer speed set to 60  
[1:17:57] pH 4.75 -> 4.95  
[1:17:57] Using charge balance adjust  
[1:17:57] Dispensed 0.001552 mL of Base (0.5 M KOH)



Sample name: **M15\_octanol**  
Assay name: **pH-metric high logP**  
Assay ID: **18C-01004**  
Filename: **C:\Sirius\_T3\Mehtap\20180228\_exp28\_logP\_T3-2\18C-01004\_M15\_octanol\_pH-metric high logP.t3r**

Experiment start time: **3/1/2018 4:33:50 AM**  
Analyst: **Pion**  
Instrument ID: **T312060**

## Experiment Log (continued)

[1:18:17] Stirrer speed set to 0  
[1:18:27] Datapoint id 84 collected  
[1:18:27] Charge balance equation is out by -6.1%  
[1:18:27] Stirrer speed set to 60  
[1:18:33] pH 4.93 -> 5.13  
[1:18:33] Using charge balance adjust  
[1:18:33] Dispensed 0.001152 mL of Base (0.5 M KOH)  
[1:18:53] Stirrer speed set to 0  
[1:19:03] Datapoint id 85 collected  
[1:19:03] Charge balance equation is out by -13.9%  
[1:19:03] Stirrer speed set to 60  
[1:19:09] pH 5.11 -> 5.31  
[1:19:09] Using charge balance adjust  
[1:19:09] Dispensed 0.000847 mL of Base (0.5 M KOH)  
[1:19:29] Stirrer speed set to 0  
[1:19:39] Datapoint id 86 collected  
[1:19:39] Charge balance equation is out by -13.8%  
[1:19:39] Stirrer speed set to 60  
[1:19:44] pH 5.29 -> 5.49  
[1:19:44] Using charge balance adjust  
[1:19:45] Dispensed 0.000611 mL of Base (0.5 M KOH)  
[1:20:05] Stirrer speed set to 0  
[1:20:16] Datapoint id 87 collected  
[1:20:16] Charge balance equation is out by -8.9%  
[1:20:16] Stirrer speed set to 60  
[1:20:21] pH 5.48 -> 5.68  
[1:20:21] Using charge balance adjust  
[1:20:21] Dispensed 0.000423 mL of Base (0.5 M KOH)  
[1:20:42] Stirrer speed set to 0  
[1:20:54] Datapoint id 88 collected  
[1:20:54] Charge balance equation is out by -11.2%  
[1:20:54] Stirrer speed set to 60  
[1:20:59] pH 5.68 -> 5.88  
[1:20:59] Using charge balance adjust  
[1:20:59] Dispensed 0.000306 mL of Base (0.5 M KOH)  
[1:21:20] Stirrer speed set to 0  
[1:21:32] Datapoint id 89 collected  
[1:21:32] Charge balance equation is out by -4.3%  
[1:21:32] Stirrer speed set to 60  
[1:21:37] pH 5.89 -> 6.09  
[1:21:37] Using charge balance adjust  
[1:21:37] Dispensed 0.000212 mL of Base (0.5 M KOH)  
[1:21:58] Stirrer speed set to 0  
[1:22:30] Datapoint id 90 collected  
[1:22:30] Charge balance equation is out by -17.7%  
[1:22:30] Stirrer speed set to 60  
[1:22:35] pH 6.08 -> 6.28  
[1:22:35] Using cautious pH adjust  
[1:22:35] Dispensed 0.000094 mL of Base (0.5 M KOH)  
[1:22:40] Stepping pH = 6.15  
[1:22:40] Dispensed 0.000094 mL of Base (0.5 M KOH)  
[1:22:46] Stepping pH = 6.33  
[1:23:01] Stirrer speed set to 0  
[1:23:41] Datapoint id 91 collected  
[1:23:41] Charge balance equation is out by -5.1%  
[1:23:41] Stirrer speed set to 60  
[1:23:46] pH 6.35 -> 6.55  
[1:23:46] Using charge balance adjust  
[1:23:46] Dispensed 0.000118 mL of Base (0.5 M KOH)

Sample name: **M15\_octanol**  
Assay name: **pH-metric high logP**  
Assay ID: **18C-01004**  
Filename: **C:\Sirius\_T3\Mehtap\20180228\_exp28\_logP\_T3-2\18C-01004\_M15\_octanol\_pH-metric high logP.t3r**

Experiment start time: **3/1/2018 4:33:50 AM**  
Analyst: **Pion**  
Instrument ID: **T312060**

## Experiment Log (continued)

[1:24:06] Stirrer speed set to 0  
[1:24:57] Datapoint id 92 collected  
[1:24:57] Charge balance equation is out by -13.5%  
[1:24:57] Stirrer speed set to 60  
[1:25:02] pH 6.61 -> 6.81  
[1:25:02] Using charge balance adjust  
[1:25:02] Dispensed 0.000094 mL of Base (0.5 M KOH)  
[1:25:22] Stirrer speed set to 0  
[1:26:22] Datapoint id 93 collected  
[1:26:22] Charge balance equation is out by -26.4%  
[1:26:22] Stirrer speed set to 60  
[1:26:27] pH 6.83 -> 7.03  
[1:26:27] Using cautious pH adjust  
[1:26:27] Dispensed 0.000024 mL of Base (0.5 M KOH)  
[1:26:32] Stepping pH = 6.90  
[1:26:32] Dispensed 0.000047 mL of Base (0.5 M KOH)  
[1:26:37] Stepping pH = 7.10  
[1:26:53] Stirrer speed set to 0  
[1:27:53] Datapoint id 94 collected  
[1:27:53] Charge balance equation is out by -5.1%  
[1:27:53] Stirrer speed set to 60  
[1:27:58] pH 7.15 -> 7.35  
[1:27:58] Using charge balance adjust  
[1:27:58] Dispensed 0.000047 mL of Base (0.5 M KOH)  
[1:28:18] Stirrer speed set to 0  
[1:29:18] Datapoint id 95 collected  
[1:29:18] Charge balance equation is out by -32.1%  
[1:29:18] Stirrer speed set to 60  
[1:29:23] pH 7.27 -> 7.47  
[1:29:23] Using cautious pH adjust  
[1:29:23] Dispensed 0.000024 mL of Base (0.5 M KOH)  
[1:29:28] Stepping pH = 7.34  
[1:29:28] Dispensed 0.000024 mL of Base (0.5 M KOH)  
[1:29:33] Stepping pH = 7.40  
[1:29:33] Dispensed 0.000024 mL of Base (0.5 M KOH)  
[1:29:38] Stepping pH = 7.52  
[1:29:54] Stirrer speed set to 0  
[1:30:54] Datapoint id 96 collected  
[1:30:54] Charge balance equation is out by -94.3%  
[1:30:54] Stirrer speed set to 60  
[1:30:59] pH 7.53 -> 7.73  
[1:30:59] Using cautious pH adjust  
[1:30:59] Dispensed 0.000024 mL of Base (0.5 M KOH)  
[1:31:04] Stepping pH = 7.55  
[1:31:04] Dispensed 0.000024 mL of Base (0.5 M KOH)  
[1:31:09] Stepping pH = 7.63  
[1:31:09] Dispensed 0.000024 mL of Base (0.5 M KOH)  
[1:31:14] Stepping pH = 7.75  
[1:31:29] Stirrer speed set to 0  
[1:32:29] Datapoint id 97 collected  
[1:32:29] Charge balance equation is out by -237.6%  
[1:32:29] Stirrer speed set to 60  
[1:32:34] pH 7.96 -> 8.16  
[1:32:34] Using cautious pH adjust  
[1:32:34] Dispensed 0.000024 mL of Base (0.5 M KOH)  
[1:32:39] Stepping pH = 8.09  
[1:32:39] Dispensed 0.000024 mL of Base (0.5 M KOH)  
[1:32:45] Stepping pH = 8.13  
[1:32:45] Dispensed 0.000024 mL of Base (0.5 M KOH)

Sample name: **M15\_octanol**  
Assay name: **pH-metric high logP**  
Assay ID: **18C-01004**  
Filename: **C:\Sirius\_T3\Mehtap\20180228\_exp28\_logP\_T3-2\18C-01004\_M15\_octanol\_pH-metric high logP.t3r**

Experiment start time: **3/1/2018 4:33:50 AM**  
Analyst: **Pion**  
Instrument ID: **T312060**

## Experiment Log (continued)

[1:32:50] Stepping pH = 8.22  
[1:33:05] Stirrer speed set to 0  
[1:34:05] Datapoint id 98 collected  
[1:34:05] Charge balance equation is out by -329.5%  
[1:34:05] Stirrer speed set to 60  
[1:34:10] pH 8.28 -> 8.48  
[1:34:10] Using cautious pH adjust  
[1:34:10] Dispensed 0.000024 mL of Base (0.5 M KOH)  
[1:34:15] Stepping pH = 8.35  
[1:34:15] Dispensed 0.000024 mL of Base (0.5 M KOH)  
[1:34:20] Stepping pH = 8.41  
[1:34:20] Dispensed 0.000024 mL of Base (0.5 M KOH)  
[1:34:25] Stepping pH = 8.43  
[1:34:25] Dispensed 0.000024 mL of Base (0.5 M KOH)  
[1:34:30] Stepping pH = 8.44  
[1:34:30] Dispensed 0.000024 mL of Base (0.5 M KOH)  
[1:34:36] Stepping pH = 8.50  
[1:34:51] Stirrer speed set to 0  
[1:35:08] Datapoint id 99 collected  
[1:35:08] Charge balance equation is out by -520.9%  
[1:35:08] Stirrer speed set to 60  
[1:35:13] pH 8.57 -> 8.77  
[1:35:13] Using cautious pH adjust  
[1:35:13] Dispensed 0.000024 mL of Base (0.5 M KOH)  
[1:35:18] Stepping pH = 8.59  
[1:35:18] Dispensed 0.000047 mL of Base (0.5 M KOH)  
[1:35:23] Stepping pH = 8.67  
[1:35:23] Dispensed 0.000047 mL of Base (0.5 M KOH)  
[1:35:28] Stepping pH = 8.76  
[1:35:43] Stirrer speed set to 0  
[1:36:15] Datapoint id 100 collected  
[1:36:15] Charge balance equation is out by -224.9%  
[1:36:15] Stirrer speed set to 60  
[1:36:20] pH 8.79 -> 8.99  
[1:36:20] Using cautious pH adjust  
[1:36:20] Dispensed 0.000024 mL of Base (0.5 M KOH)  
[1:36:25] Stepping pH = 8.82  
[1:36:25] Dispensed 0.000071 mL of Base (0.5 M KOH)  
[1:36:30] Stepping pH = 8.90  
[1:36:30] Dispensed 0.000047 mL of Base (0.5 M KOH)  
[1:36:35] Stepping pH = 8.97  
[1:36:35] Dispensed 0.000024 mL of Base (0.5 M KOH)  
[1:36:41] Stepping pH = 8.96  
[1:36:41] Dispensed 0.000094 mL of Base (0.5 M KOH)  
[1:36:46] Stepping pH = 9.08  
[1:37:01] Stirrer speed set to 0  
[1:37:14] Datapoint id 101 collected  
[1:37:14] Charge balance equation is out by -394.5%  
[1:37:14] Stirrer speed set to 60  
[1:37:19] pH 9.11 -> 9.31  
[1:37:19] Using cautious pH adjust  
[1:37:20] Dispensed 0.000047 mL of Base (0.5 M KOH)  
[1:37:25] Stepping pH = 9.14  
[1:37:25] Dispensed 0.000118 mL of Base (0.5 M KOH)  
[1:37:30] Stepping pH = 9.26  
[1:37:30] Dispensed 0.000047 mL of Base (0.5 M KOH)  
[1:37:35] Stepping pH = 9.30  
[1:37:35] Dispensed 0.000024 mL of Base (0.5 M KOH)  
[1:37:40] Stepping pH = 9.31

Sample name: **M15\_octanol**  
Assay name: **pH-metric high logP**  
Assay ID: **18C-01004**  
Filename: **C:\Sirius\_T3\Mehtap\20180228\_exp28\_logP\_T3-2\18C-01004\_M15\_octanol\_pH-metric high logP.t3r**

Experiment start time: **3/1/2018 4:33:50 AM**  
Analyst: **Pion**  
Instrument ID: **T312060**

## Experiment Log (continued)

[1:37:55] Stirrer speed set to 0  
[1:38:13] Datapoint id 102 collected  
[1:38:13] Charge balance equation is out by -152.8%  
[1:38:13] Stirrer speed set to 60  
[1:38:18] pH 9.33 -> 9.53  
[1:38:18] Using cautious pH adjust  
[1:38:18] Dispensed 0.000071 mL of Base (0.5 M KOH)  
[1:38:23] Stepping pH = 9.37  
[1:38:24] Dispensed 0.000141 mL of Base (0.5 M KOH)  
[1:38:29] Stepping pH = 9.50  
[1:38:29] Dispensed 0.000047 mL of Base (0.5 M KOH)  
[1:38:34] Stepping pH = 9.52  
[1:38:49] Stirrer speed set to 0  
[1:39:00] Datapoint id 103 collected  
[1:39:00] Charge balance equation is out by -71.5%  
[1:39:00] Stirrer speed set to 60  
[1:39:05] pH 9.54 -> 9.74  
[1:39:05] Using cautious pH adjust  
[1:39:05] Dispensed 0.000094 mL of Base (0.5 M KOH)  
[1:39:10] Stepping pH = 9.58  
[1:39:10] Dispensed 0.000188 mL of Base (0.5 M KOH)  
[1:39:15] Stepping pH = 9.71  
[1:39:15] Dispensed 0.000047 mL of Base (0.5 M KOH)  
[1:39:20] Stepping pH = 9.73  
[1:39:36] Stirrer speed set to 0  
[1:39:47] Datapoint id 104 collected  
[1:39:47] Charge balance equation is out by -52.8%  
[1:39:47] Stirrer speed set to 60  
[1:39:52] pH 9.74 -> 9.94  
[1:39:52] Using cautious pH adjust  
[1:39:52] Dispensed 0.000165 mL of Base (0.5 M KOH)  
[1:39:57] Stepping pH = 9.82  
[1:39:57] Dispensed 0.000165 mL of Base (0.5 M KOH)  
[1:40:02] Stepping pH = 9.91  
[1:40:02] Dispensed 0.000071 mL of Base (0.5 M KOH)  
[1:40:07] Stepping pH = 9.93  
[1:40:07] Dispensed 0.000024 mL of Base (0.5 M KOH)  
[1:40:12] Stepping pH = 9.94  
[1:40:27] Stirrer speed set to 0  
[1:40:38] Datapoint id 105 collected  
[1:40:38] Charge balance equation is out by -33.7%  
[1:40:38] Stirrer speed set to 60  
[1:40:43] pH 9.94 -> 10.05  
[1:40:43] Using cautious pH adjust  
[1:40:43] Dispensed 0.000118 mL of Base (0.5 M KOH)  
[1:40:48] Stepping pH = 9.97  
[1:40:48] Dispensed 0.000141 mL of Base (0.5 M KOH)  
[1:40:53] Stepping pH = 10.04  
[1:41:08] Stirrer speed set to 0  
[1:41:18] Datapoint id 106 collected  
[1:41:18] Charge balance equation is out by -10.7%  
[1:41:18] Argon flow rate set to 0  
[1:41:22] Titrator arm moved over Titration position
