# Supplementary material for: Octanol-water partition coefficient measurements for the SAMPL6 Blind Prediction Challenge
Source: bioRxiv or medRxiv preprint supplement (doi:10.1101/757393), 2019-12-02
Supplement: Supplementary file [file media-2.zip]

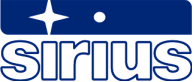

Sample name: **M02\_octanol** Experiment start time: **3/6/2018 5:41:59 PM**  
Assay name: **pH-metric high logP** Analyst: **Dorothy Levorse**  
Assay ID: **18C-06015** Instrument ID: **T312060**  
Filename: **C:\Sirius\_T3\Mehtap\20180306\_exp30\_logP\_T3-2\18C-06015\_M02\_octanol\_pH-metric high logP.t3r**

## pH-metric Result

logP (XH +) 1.14 ±0.04 (n=50)  
logP (neutral X) 4.16 ±0.01 (n=50)

### 18C-06015 Points 1 to 20

M02\_octanol concentration factor 0.918  
Carbonate 0.0000 mM  
Acidity error -0.42538 mM

### 18C-06015 Points 21 to 34

M02\_octanol concentration factor 0.898  
Carbonate 0.0001 mM  
Acidity error -0.16274 mM

### 18C-06015 Points 35 to 48

M02\_octanol concentration factor 0.730  
Carbonate 0.1987 mM  
Acidity error -0.19134 mM

## Warnings and errors

Errors None  
Warnings None

## Sample logD and percent species

| pH     | M02_octanol<br>logD | M02_octanol<br>M02_octanolH | M02_octanol<br>M02_octanol | M02_octanol<br>M02_octanolH* | M02_octanol<br>M02_octanol* | Comment    |
|--------|---------------------|-----------------------------|----------------------------|------------------------------|-----------------------------|------------|
| 1.000  | 1.18                | 6.22 %                      | 0.00 %                     | 85.42 %                      | 8.36 %                      | Stomach pH |
| 1.200  | 1.20                | 5.93 %                      | 0.00 %                     | 81.44 %                      | 12.64 %                     |            |
| 2.000  | 1.43                | 3.55 %                      | 0.00 %                     | 48.74 %                      | 47.71 %                     |            |
| 3.000  | 2.17                | 0.67 %                      | 0.01 %                     | 9.21 %                       | 90.12 %                     |            |
| 4.000  | 3.09                | 0.07 %                      | 0.01 %                     | 1.01 %                       | 98.91 %                     |            |
| 5.000  | 3.84                | 0.01 %                      | 0.01 %                     | 0.10 %                       | 99.88 %                     | Blood pH   |
| 6.000  | 4.11                | 0.00 %                      | 0.01 %                     | 0.01 %                       | 99.98 %                     |            |
| 6.500  | 4.14                | 0.00 %                      | 0.01 %                     | 0.00 %                       | 99.99 %                     |            |
| 7.000  | 4.15                | 0.00 %                      | 0.01 %                     | 0.00 %                       | 99.99 %                     |            |
| 7.400  | 4.16                | 0.00 %                      | 0.01 %                     | 0.00 %                       | 99.99 %                     |            |
| 8.000  | 4.16                | 0.00 %                      | 0.01 %                     | 0.00 %                       | 99.99 %                     |            |
| 9.000  | 4.16                | 0.00 %                      | 0.01 %                     | 0.00 %                       | 99.99 %                     |            |
| 10.000 | 4.16                | 0.00 %                      | 0.01 %                     | 0.00 %                       | 99.99 %                     |            |
| 11.000 | 4.16                | 0.00 %                      | 0.01 %                     | 0.00 %                       | 99.99 %                     |            |
| 12.000 | 4.16                | 0.00 %                      | 0.01 %                     | 0.00 %                       | 99.99 %                     |            |

Sample name: **M02\_octanol**  
 Assay name: **pH-metric high logP**  
 Assay ID: **18C-06015**  
 Filename: **C:\Sirius\_T3\Mehtap\20180306\_exp30\_logP\_T3-2\18C-06015\_M02\_octanol\_pH-metric high logP.t3r**

Experiment start time: **3/6/2018 5:41:59 PM**  
 Analyst: **Dorothy Leverse**  
 Instrument ID: **T312060**

## Graphs

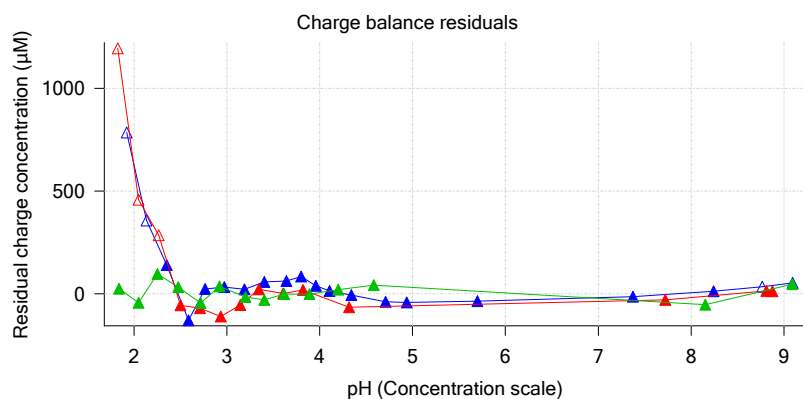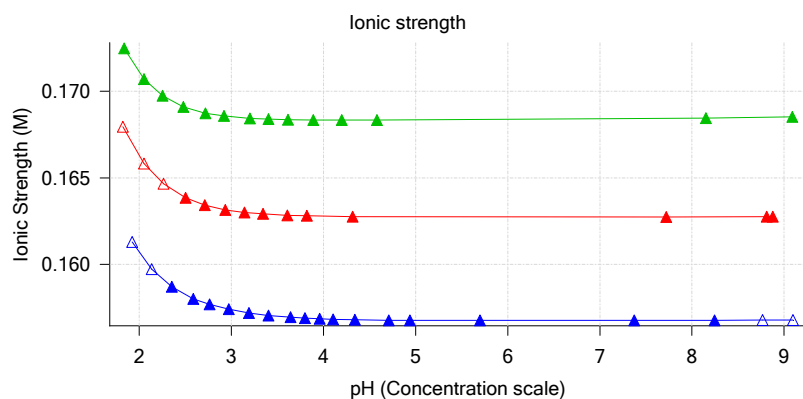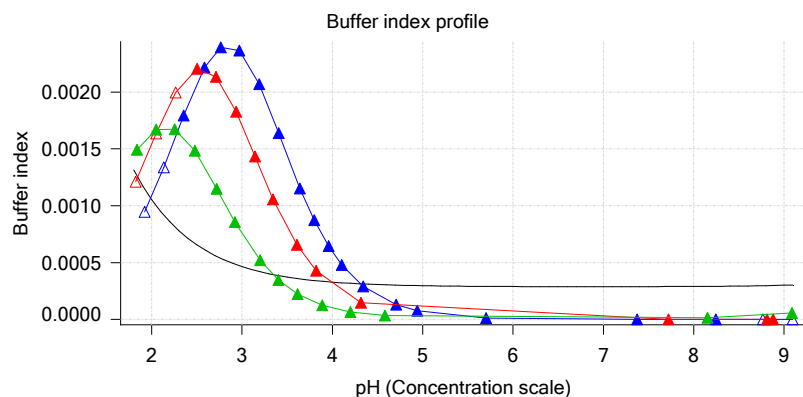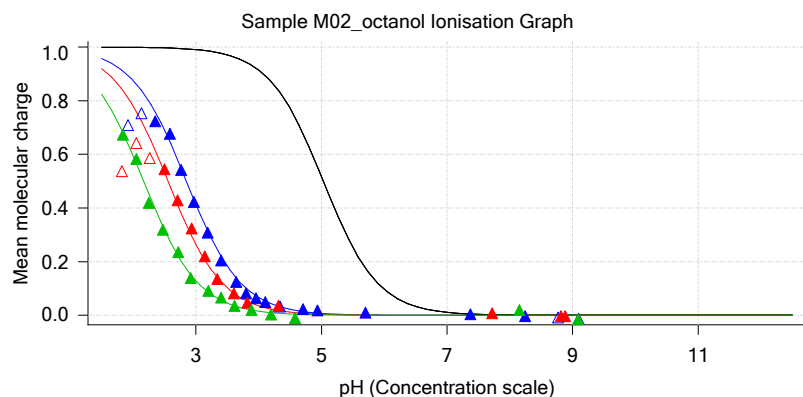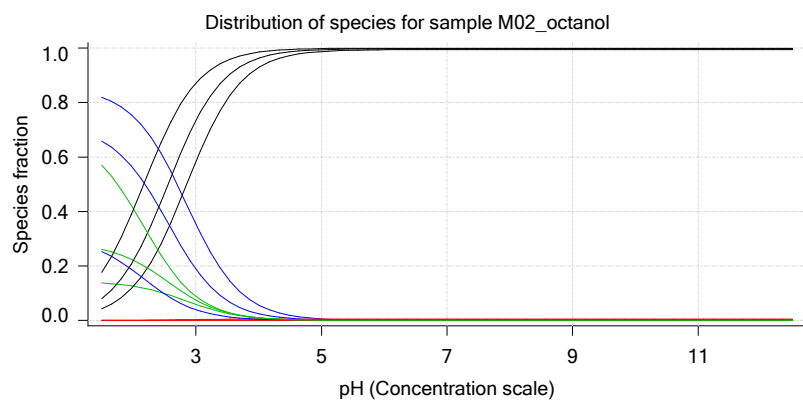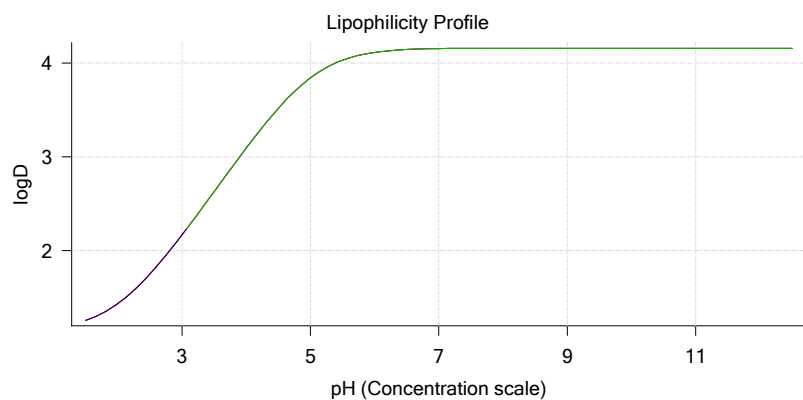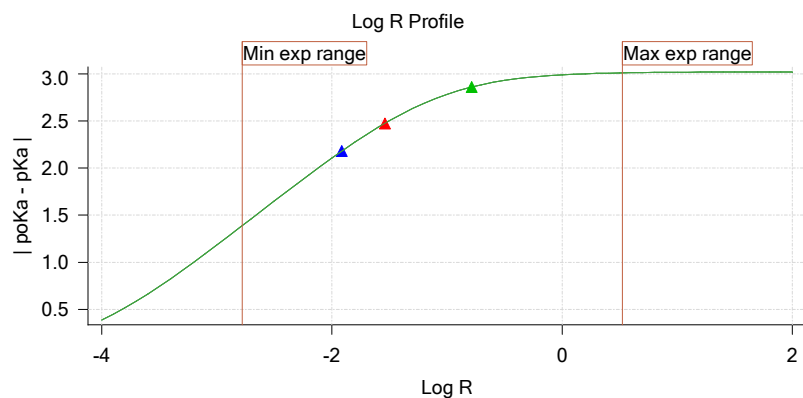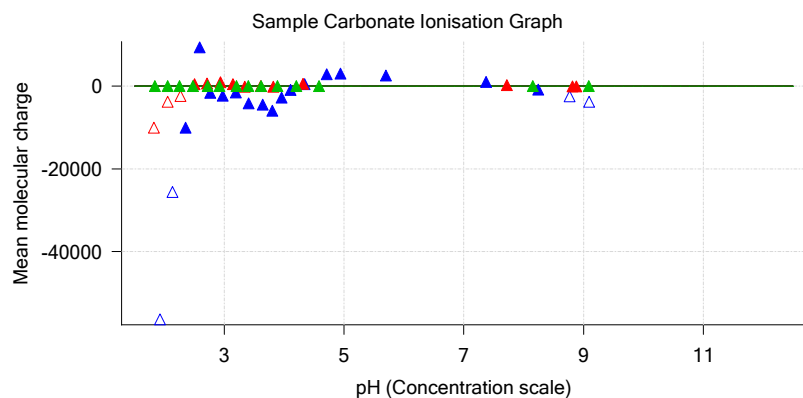

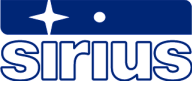

Sample name: **M02\_octanol**  
Assay name: **pH-metric high logP**  
Assay ID: **18C-06015**  
Filename: **C:\Sirius\_T3\Mehtap\20180306\_exp30\_logP\_T3-2\18C-06015\_M02\_octanol\_pH-metric high logP.t3r**

Experiment start time: **3/6/2018 5:41:59 PM**  
Analyst: **Dorothy Levorse**  
Instrument ID: **T312060**

## Graphs (continued)

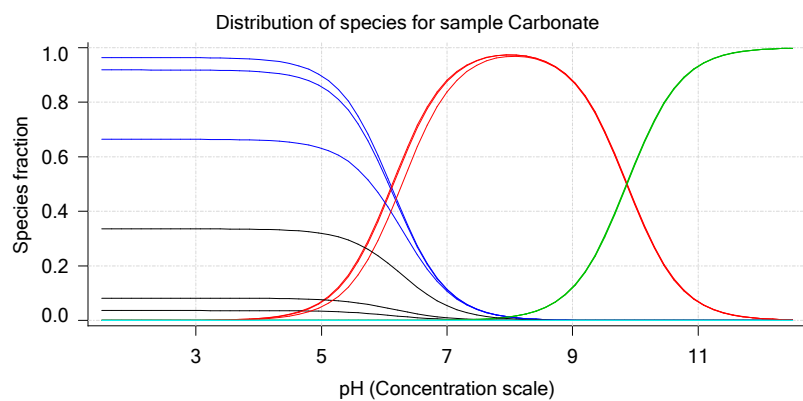

Sample name: **M02\_octanol**  
 Assay name: **pH-metric high logP**  
 Assay ID: **18C-06015**  
 Filename: **C:\Sirius\_T3\Mehtap\20180306\_exp30\_logP\_T3-2\18C-06015\_M02\_octanol\_pH-metric high logP.t3r**

Experiment start time: **3/6/2018 5:41:59 PM**  
 Analyst: **Dorothy Levorse**  
 Instrument ID: **T312060**

## pH-metric high logP Titration 1 of 3 18C-06015 Points 1 to 20

### Overall results

RMSD 2.836  
 Average ionic strength 0.157 M  
 Average temperature 24.9°C  
 Partition ratio 0.0122 : 1  
 Analyte concentration range 4481.9 µM to 4615.4 µM  
 Total points considered 16 of 20

### Warnings and errors

Errors None  
 Warnings None

### Four-Plus parameters

Alpha 0.124 3/6/2018 5:41:59 PM C:\Sirius\_T3\18C-06006\_Blank standardisation.t3r  
 S 0.9973 3/6/2018 5:41:59 PM C:\Sirius\_T3\18C-06006\_Blank standardisation.t3r  
 jH 0.9 3/6/2018 5:41:59 PM C:\Sirius\_T3\18C-06006\_Blank standardisation.t3r  
 jOH -0.7 3/6/2018 5:41:59 PM C:\Sirius\_T3\18C-06006\_Blank standardisation.t3r

### Titrants

0.50 M HCl 0.989131 3/6/2018 5:41:59 PM C:\Sirius\_T3\18C-06006\_Blank standardisation.t3r  
 0.50 M KOH 0.999845 3/6/2018 5:41:59 PM C:\Sirius\_T3\KOH18B27.t3r

### Sample

M02\_octanol concentration factor 0.918  
 Base pKa 1 5.03  
 logP (XH +) 1.32  
 logP (neutral X) 4.20

### Sample graphs

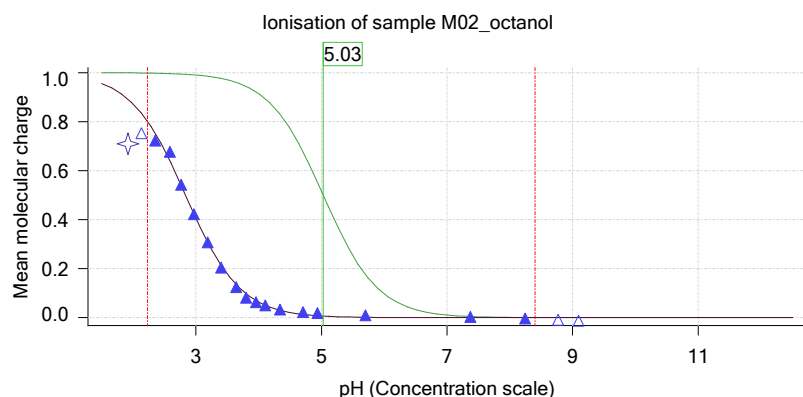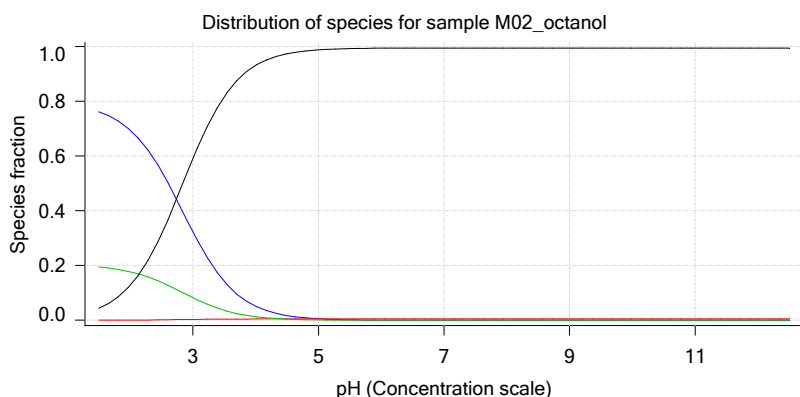

Sample name: **M02\_octanol**  
 Assay name: **pH-metric high logP**  
 Assay ID: **18C-06015**  
 Filename: **C:\Sirius\_T3\Mehtap\20180306\_exp30\_logP\_T3-2\18C-06015\_M02\_octanol\_pH-metric high logP.t3r**

Experiment start time: **3/6/2018 5:41:59 PM**  
 Analyst: **Dorothy Levorse**  
 Instrument ID: **T312060**

## Sample graphs (continued)

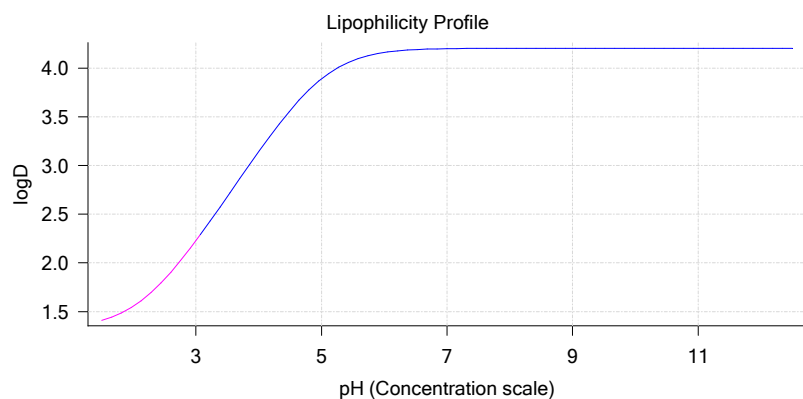

## Sample logD and percent species

| pH     | M02_octanol<br>logD | M02_octanol<br>M02_octanolH | M02_octanol<br>M02_octanolH | M02_octanol<br>M02_octanolH* | M02_octanol<br>M02_octanol* | Comment    |
|--------|---------------------|-----------------------------|-----------------------------|------------------------------|-----------------------------|------------|
| 1.000  | 1.35                | 78.52 %                     | 0.01 %                      | 20.04 %                      | 1.43 %                      | Stomach pH |
| 1.200  | 1.37                | 77.87 %                     | 0.01 %                      | 19.87 %                      | 2.25 %                      |            |
| 2.000  | 1.55                | 69.52 %                     | 0.06 %                      | 17.74 %                      | 12.68 %                     |            |
| 3.000  | 2.23                | 32.38 %                     | 0.30 %                      | 8.26 %                       | 59.05 %                     |            |
| 4.000  | 3.14                | 5.11 %                      | 0.48 %                      | 1.30 %                       | 93.11 %                     |            |
| 5.000  | 3.89                | 0.54 %                      | 0.51 %                      | 0.14 %                       | 98.81 %                     | Blood pH   |
| 6.000  | 4.16                | 0.05 %                      | 0.51 %                      | 0.01 %                       | 99.42 %                     |            |
| 6.500  | 4.19                | 0.02 %                      | 0.51 %                      | 0.00 %                       | 99.47 %                     |            |
| 7.000  | 4.20                | 0.01 %                      | 0.51 %                      | 0.00 %                       | 99.48 %                     |            |
| 7.400  | 4.20                | 0.00 %                      | 0.51 %                      | 0.00 %                       | 99.49 %                     |            |
| 8.000  | 4.20                | 0.00 %                      | 0.51 %                      | 0.00 %                       | 99.49 %                     |            |
| 9.000  | 4.20                | 0.00 %                      | 0.51 %                      | 0.00 %                       | 99.49 %                     |            |
| 10.000 | 4.20                | 0.00 %                      | 0.51 %                      | 0.00 %                       | 99.49 %                     |            |
| 11.000 | 4.20                | 0.00 %                      | 0.51 %                      | 0.00 %                       | 99.49 %                     |            |
| 12.000 | 4.20                | 0.00 %                      | 0.51 %                      | 0.00 %                       | 99.49 %                     |            |

## Carbonate and acidity

Carbonate 0.000 mM  
 Acidity error -0.425 mM

## Other graphs

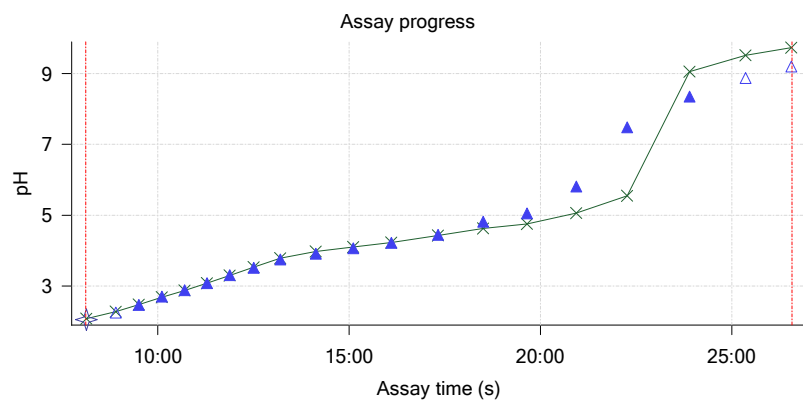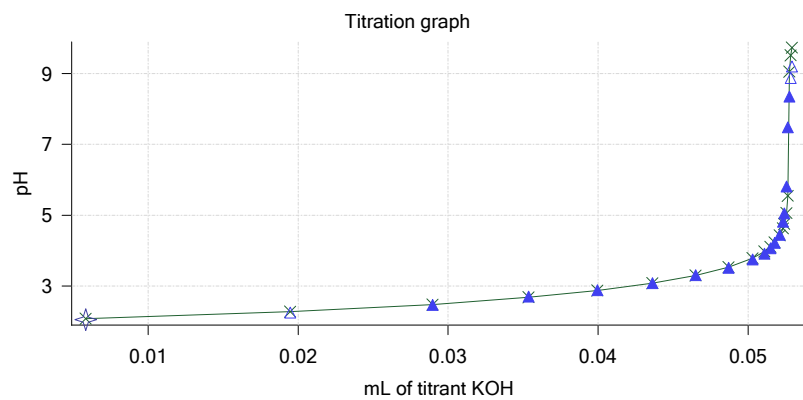

Sample name: **M02\_octanol**  
 Assay name: **pH-metric high logP**  
 Assay ID: **18C-06015**  
 Filename: **C:\Sirius\_T3\Mehtap\20180306\_exp30\_logP\_T3-2\18C-06015\_M02\_octanol\_pH-metric high logP.t3r**

Experiment start time: **3/6/2018 5:41:59 PM**  
 Analyst: **Dorothy Levorse**  
 Instrument ID: **T312060**

## Other graphs (continued)

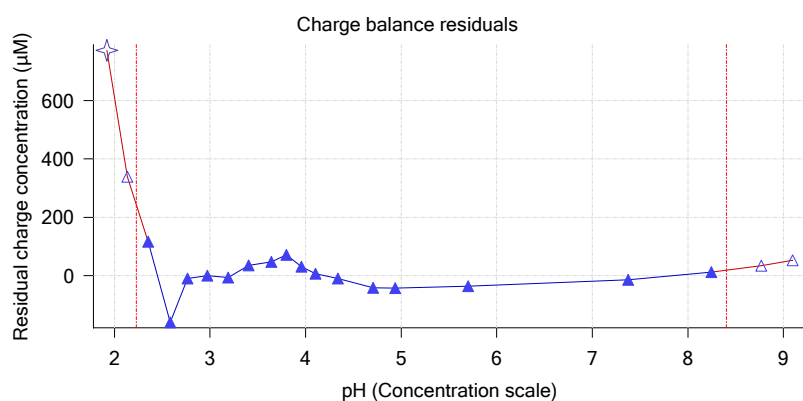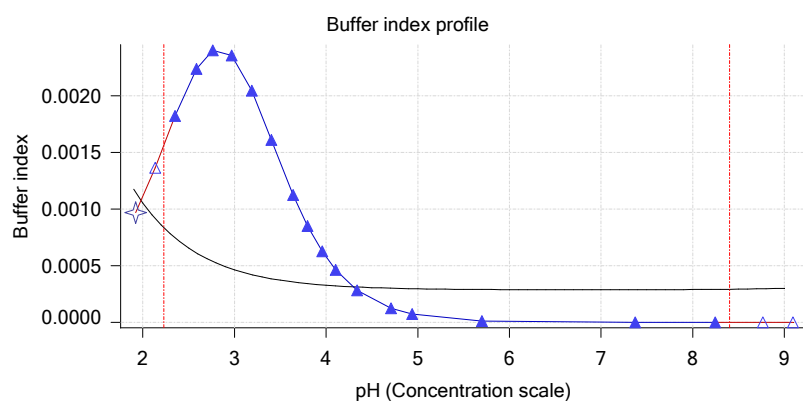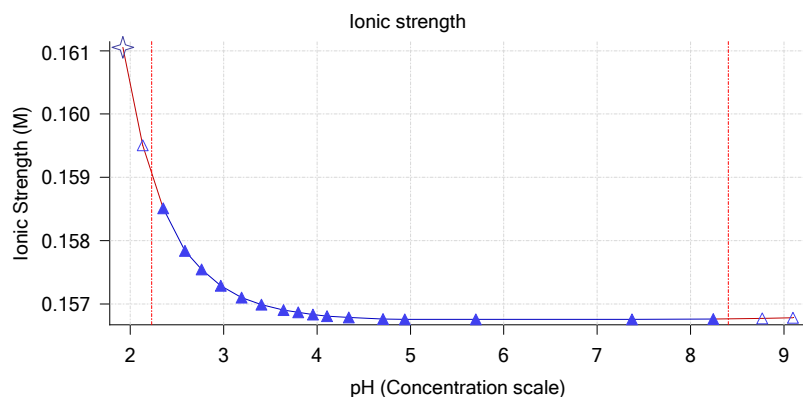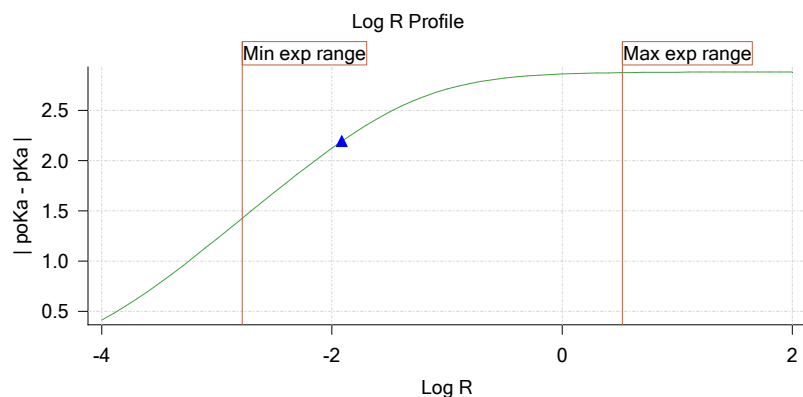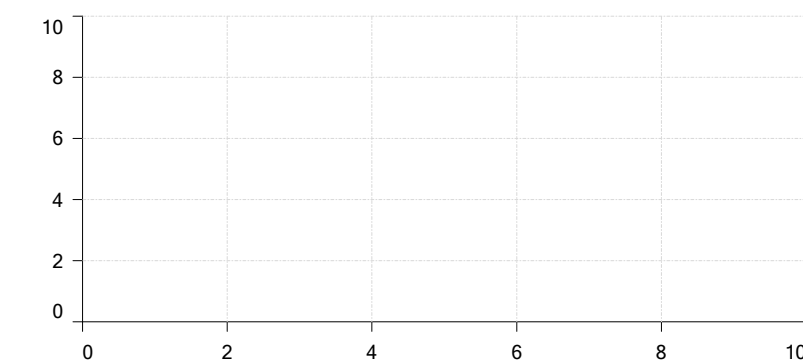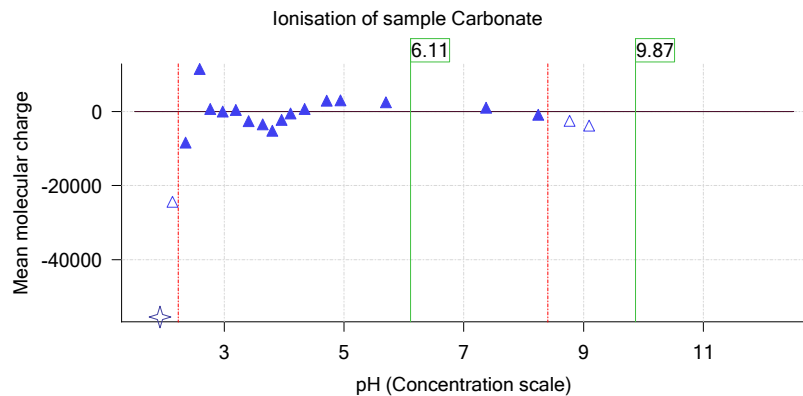

Sample name: **M02\_octanol**  
 Assay name: **pH-metric high logP**  
 Assay ID: **18C-06015**  
 Filename: **C:\Sirius\_T3\Mehtap\20180306\_exp30\_logP\_T3-2\18C-06015\_M02\_octanol\_pH-metric high logP.t3r**

Experiment start time: **3/6/2018 5:41:59 PM**  
 Analyst: **Dorothy Levorse**  
 Instrument ID: **T312060**

## pH-metric high logP Titration 2 of 3 18C-06015 Points 21 to 34

### Overall results

RMSD 4.143  
 Average ionic strength 0.163 M  
 Average temperature 25.0°C  
 Partition ratio 0.0289 : 1  
 Analyte concentration range 4116.8 µM to 4254.1 µM  
 Total points considered 11 of 14

### Warnings and errors

Errors None  
 Warnings None

### Four-Plus parameters

Alpha 0.124 3/6/2018 5:41:59 PM C:\Sirius\_T3\18C-06006\_Blank standardisation.t3r  
 S 0.9973 3/6/2018 5:41:59 PM C:\Sirius\_T3\18C-06006\_Blank standardisation.t3r  
 jH 0.9 3/6/2018 5:41:59 PM C:\Sirius\_T3\18C-06006\_Blank standardisation.t3r  
 jOH -0.7 3/6/2018 5:41:59 PM C:\Sirius\_T3\18C-06006\_Blank standardisation.t3r

### Titrants

0.50 M HCl 0.989131 3/6/2018 5:41:59 PM C:\Sirius\_T3\18C-06006\_Blank standardisation.t3r  
 0.50 M KOH 0.999845 3/6/2018 5:41:59 PM C:\Sirius\_T3\KOH18B27.t3r

### Sample

M02\_octanol concentration factor 0.898  
 Base pKa 1 5.03  
 logP (XH +) 1.32  
 logP (neutral X) 4.19

### Sample graphs

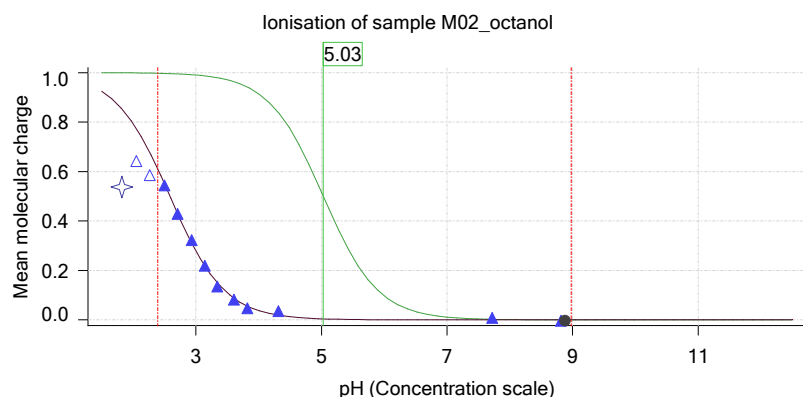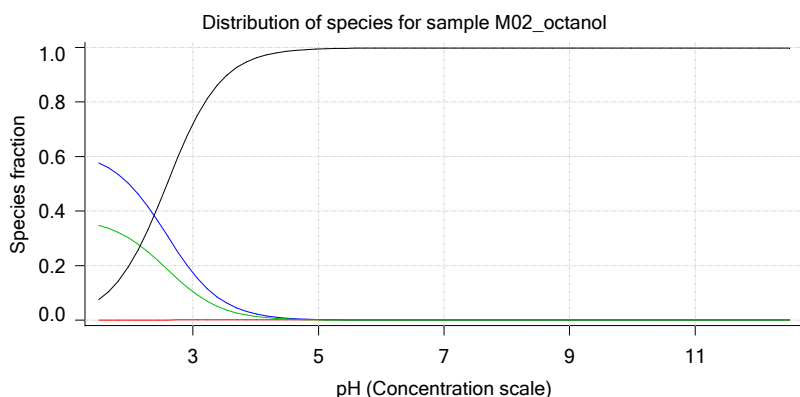

Sample name: **M02\_octanol**  
Assay name: **pH-metric high logP**  
Assay ID: **18C-06015**  
Filename: **C:\Sirius\_T3\Mehtap\20180306\_exp30\_logP\_T3-2\18C-06015\_M02\_octanol\_pH-metric high logP.t3r**

Experiment start time: **3/6/2018 5:41:59 PM**  
Analyst: **Dorothy Levorse**  
Instrument ID: **T312060**

## Sample graphs (continued)

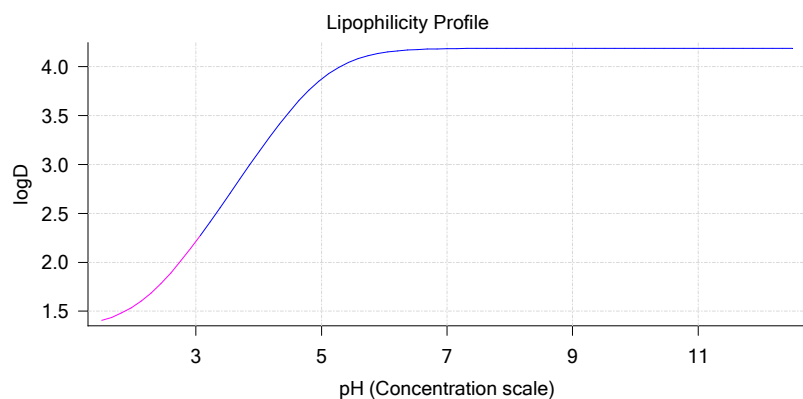

## Sample logD and percent species

| pH     | M02_octanol<br>logD | M02_octanol<br>M02_octanolH | M02_octanol<br>M02_octanolH | M02_octanol<br>M02_octanolH* | M02_octanol<br>M02_octanol* | Comment    |
|--------|---------------------|-----------------------------|-----------------------------|------------------------------|-----------------------------|------------|
| 1.000  | 1.35                | 60.82 %                     | 0.01 %                      | 36.66 %                      | 2.52 %                      |            |
| 1.200  | 1.36                | 59.93 %                     | 0.01 %                      | 36.13 %                      | 3.93 %                      | Stomach pH |
| 2.000  | 1.55                | 49.56 %                     | 0.05 %                      | 29.87 %                      | 20.52 %                     |            |
| 3.000  | 2.21                | 17.38 %                     | 0.16 %                      | 10.48 %                      | 71.97 %                     |            |
| 4.000  | 3.12                | 2.32 %                      | 0.22 %                      | 1.40 %                       | 96.06 %                     |            |
| 5.000  | 3.87                | 0.24 %                      | 0.22 %                      | 0.14 %                       | 99.39 %                     |            |
| 6.000  | 4.14                | 0.02 %                      | 0.22 %                      | 0.01 %                       | 99.74 %                     | Blood pH   |
| 6.500  | 4.17                | 0.01 %                      | 0.22 %                      | 0.00 %                       | 99.76 %                     |            |
| 7.000  | 4.18                | 0.00 %                      | 0.22 %                      | 0.00 %                       | 99.77 %                     |            |
| 7.400  | 4.19                | 0.00 %                      | 0.22 %                      | 0.00 %                       | 99.77 %                     |            |
| 8.000  | 4.19                | 0.00 %                      | 0.22 %                      | 0.00 %                       | 99.77 %                     |            |
| 9.000  | 4.19                | 0.00 %                      | 0.22 %                      | 0.00 %                       | 99.78 %                     |            |
| 10.000 | 4.19                | 0.00 %                      | 0.22 %                      | 0.00 %                       | 99.78 %                     |            |
| 11.000 | 4.19                | 0.00 %                      | 0.22 %                      | 0.00 %                       | 99.78 %                     |            |
| 12.000 | 4.19                | 0.00 %                      | 0.22 %                      | 0.00 %                       | 99.78 %                     |            |

## Carbonate and acidity

Carbonate 0.000 mM  
Acidity error -0.163 mM

## Other graphs

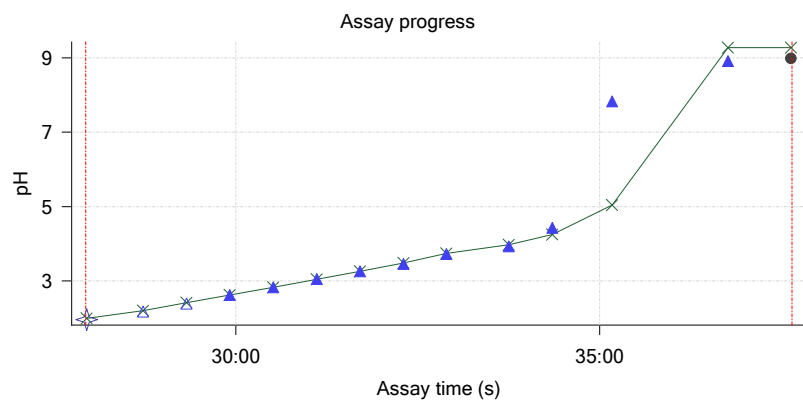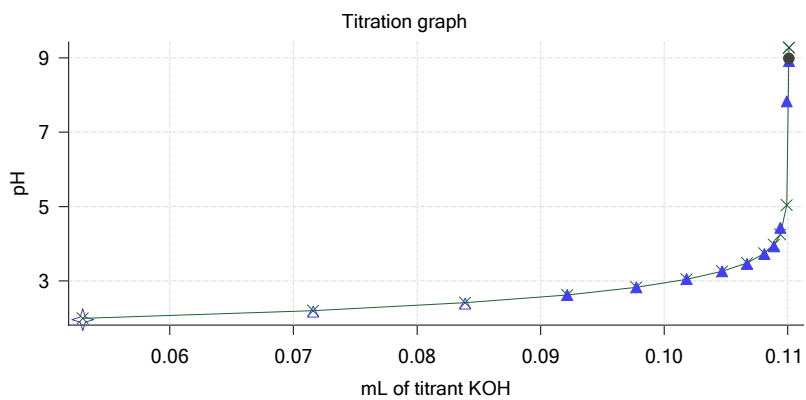



Sample name: **M02\_octanol**  
 Assay name: **pH-metric high logP**  
 Assay ID: **18C-06015**  
 Filename: **C:\Sirius\_T3\Mehtap\20180306\_exp30\_logP\_T3-2\18C-06015\_M02\_octanol\_pH-metric high logP.t3r**

Experiment start time: **3/6/2018 5:41:59 PM**  
 Analyst: **Dorothy Levorse**  
 Instrument ID: **T312060**

## Other graphs (continued)

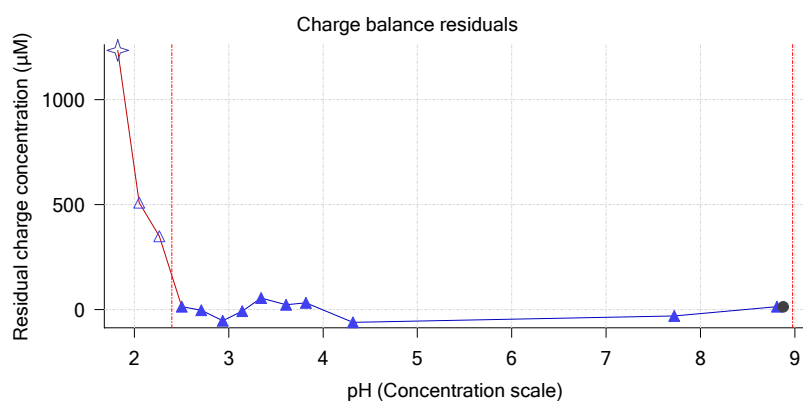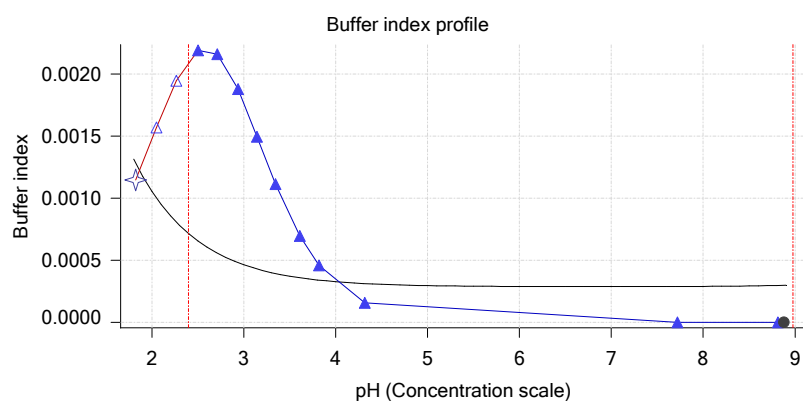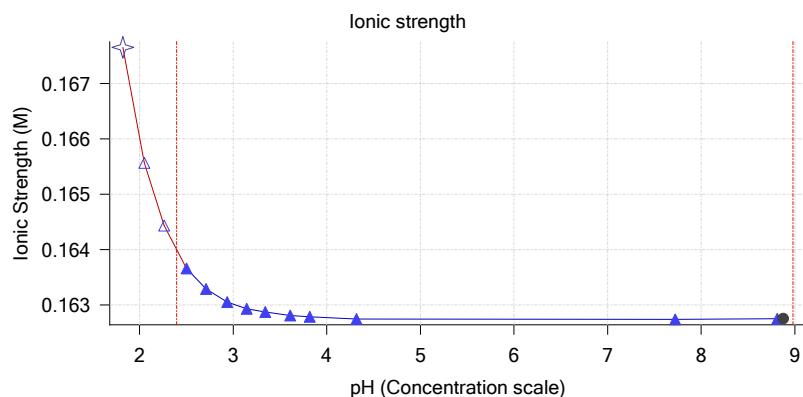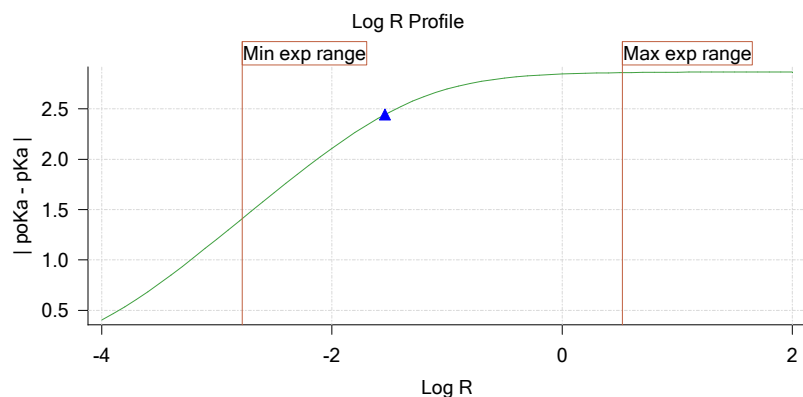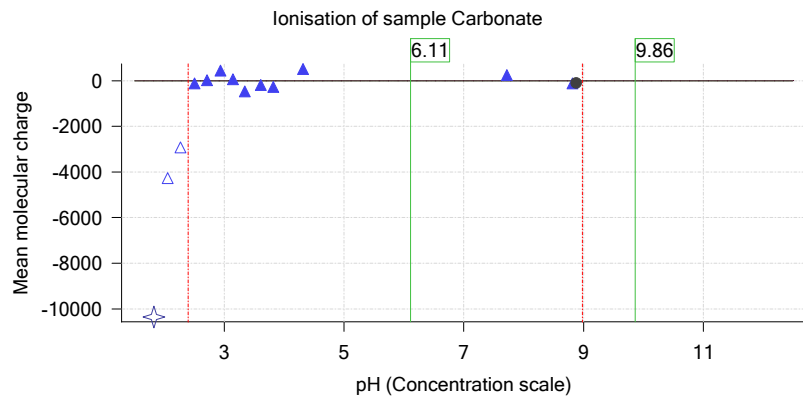

Sample name: **M02\_octanol**  
 Assay name: **pH-metric high logP**  
 Assay ID: **18C-06015**  
 Filename: **C:\Sirius\_T3\Mehtap\20180306\_exp30\_logP\_T3-2\18C-06015\_M02\_octanol\_pH-metric high logP.t3r**

Experiment start time: **3/6/2018 5:41:59 PM**  
 Analyst: **Dorothy Levorse**  
 Instrument ID: **T312060**

pH-metric high logP Titration 3 of 3 18C-06015 Points 35 to 48

## Overall results

RMSD 0.729  
 Average ionic strength 0.169 M  
 Average temperature 25.0°C  
 Partition ratio 0.1637 : 1  
 Analyte concentration range 3405.3 µM to 3503.8 µM  
 Total points considered 14 of 14

## Warnings and errors

Errors None  
 Warnings None

## Four-Plus parameters

Alpha 0.124 3/6/2018 5:41:59 PM C:\Sirius\_T3\18C-06006\_Blank standardisation.t3r  
 S 0.9973 3/6/2018 5:41:59 PM C:\Sirius\_T3\18C-06006\_Blank standardisation.t3r  
 jH 0.9 3/6/2018 5:41:59 PM C:\Sirius\_T3\18C-06006\_Blank standardisation.t3r  
 jOH -0.7 3/6/2018 5:41:59 PM C:\Sirius\_T3\18C-06006\_Blank standardisation.t3r

## Titrants

0.50 M HCl 0.989131 3/6/2018 5:41:59 PM C:\Sirius\_T3\18C-06006\_Blank standardisation.t3r  
 0.50 M KOH 0.999845 3/6/2018 5:41:59 PM C:\Sirius\_T3\KOH18B27.t3r

## Sample

M02\_octanol concentration factor 0.730  
 Base pKa 1 5.03  
 logP (XH +) 1.32  
 logP (neutral X) 4.31

## Sample graphs

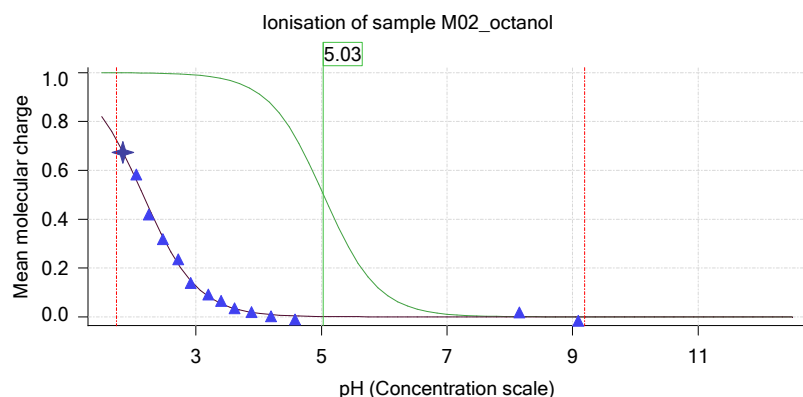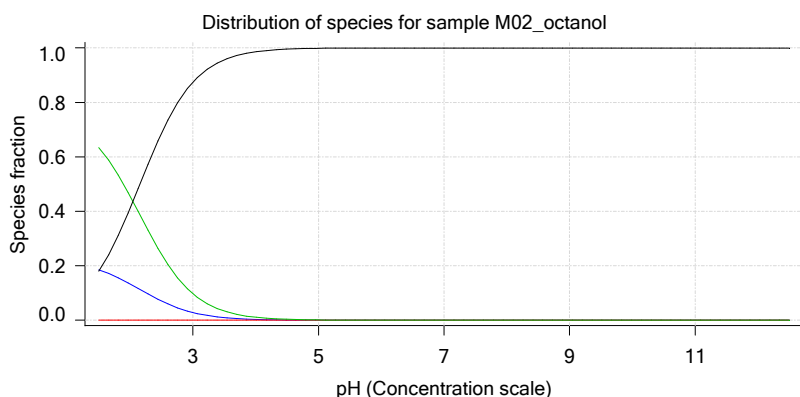

Sample name: **M02\_octanol**  
Assay name: **pH-metric high logP**  
Assay ID: **18C-06015**  
Filename: **C:\Sirius\_T3\Mehtap\20180306\_exp30\_logP\_T3-2\18C-06015\_M02\_octanol\_pH-metric high logP.t3r**

Experiment start time: **3/6/2018 5:41:59 PM**  
Analyst: **Dorothy Levorse**  
Instrument ID: **T312060**

## Sample graphs (continued)

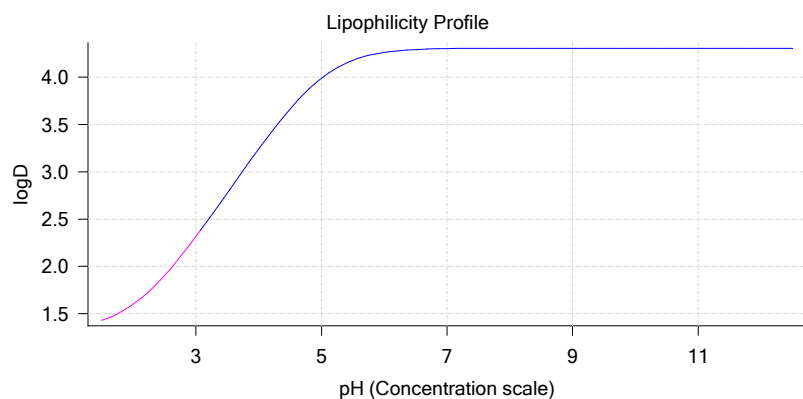

## Sample logD and percent species

| pH     | M02_octanol<br>logD | M02_octanol<br>M02_octanolH | M02_octanol<br>M02_octanolH | M02_octanol<br>M02_octanolH* | M02_octanol<br>M02_octanol* | Comment    |
|--------|---------------------|-----------------------------|-----------------------------|------------------------------|-----------------------------|------------|
| 1.000  | 1.36                | 21.15 %                     | 0.00 %                      | 72.32 %                      | 6.53 %                      |            |
| 1.200  | 1.38                | 20.37 %                     | 0.00 %                      | 69.66 %                      | 9.97 %                      | Stomach pH |
| 2.000  | 1.60                | 13.32 %                     | 0.01 %                      | 45.54 %                      | 41.14 %                     |            |
| 3.000  | 2.32                | 2.83 %                      | 0.03 %                      | 9.68 %                       | 87.46 %                     |            |
| 4.000  | 3.24                | 0.32 %                      | 0.03 %                      | 1.09 %                       | 98.56 %                     |            |
| 5.000  | 3.99                | 0.03 %                      | 0.03 %                      | 0.11 %                       | 99.83 %                     |            |
| 6.000  | 4.26                | 0.00 %                      | 0.03 %                      | 0.01 %                       | 99.96 %                     | Blood pH   |
| 6.500  | 4.29                | 0.00 %                      | 0.03 %                      | 0.00 %                       | 99.97 %                     |            |
| 7.000  | 4.30                | 0.00 %                      | 0.03 %                      | 0.00 %                       | 99.97 %                     |            |
| 7.400  | 4.30                | 0.00 %                      | 0.03 %                      | 0.00 %                       | 99.97 %                     |            |
| 8.000  | 4.31                | 0.00 %                      | 0.03 %                      | 0.00 %                       | 99.97 %                     |            |
| 9.000  | 4.31                | 0.00 %                      | 0.03 %                      | 0.00 %                       | 99.97 %                     |            |
| 10.000 | 4.31                | 0.00 %                      | 0.03 %                      | 0.00 %                       | 99.97 %                     |            |
| 11.000 | 4.31                | 0.00 %                      | 0.03 %                      | 0.00 %                       | 99.97 %                     |            |
| 12.000 | 4.31                | 0.00 %                      | 0.03 %                      | 0.00 %                       | 99.97 %                     |            |

## Carbonate and acidity

Carbonate 0.199 mM  
Acidity error -0.191 mM

## Other graphs

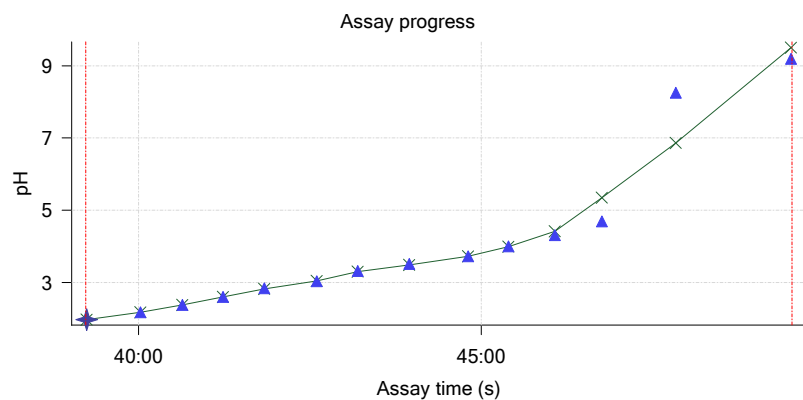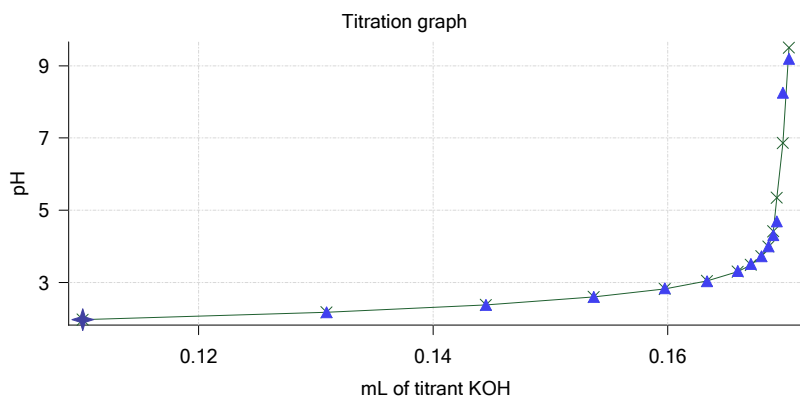

Sample name: **M02\_octanol**  
 Assay name: **pH-metric high logP**  
 Assay ID: **18C-06015**  
 Filename: **C:\Sirius\_T3\Mehtap\20180306\_exp30\_logP\_T3-2\18C-06015\_M02\_octanol\_pH-metric high logP.t3r**

Experiment start time: **3/6/2018 5:41:59 PM**  
 Analyst: **Dorothy Levorse**  
 Instrument ID: **T312060**

## Other graphs (continued)

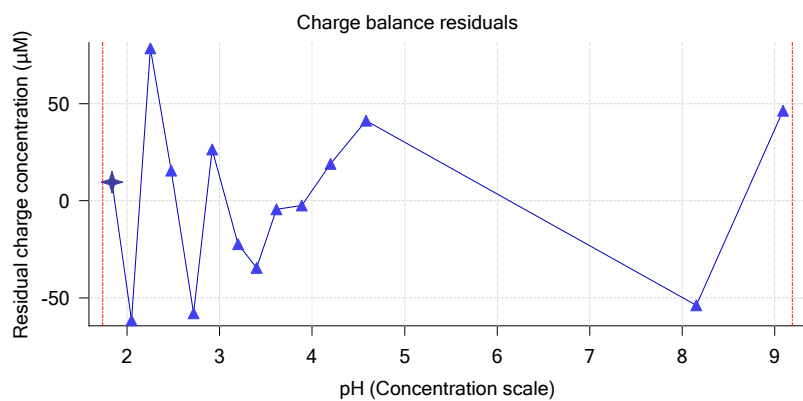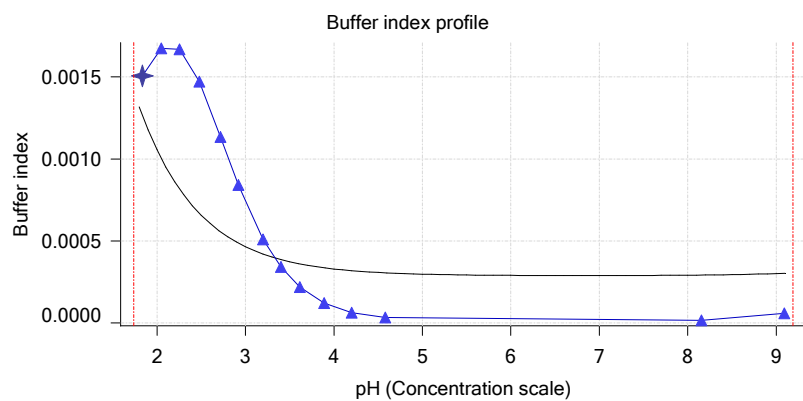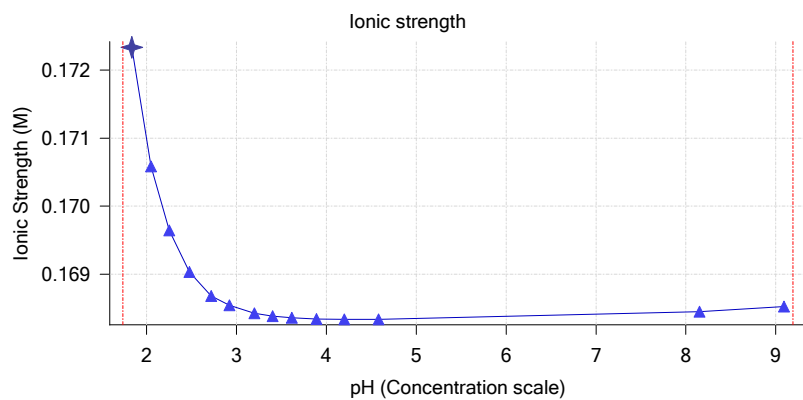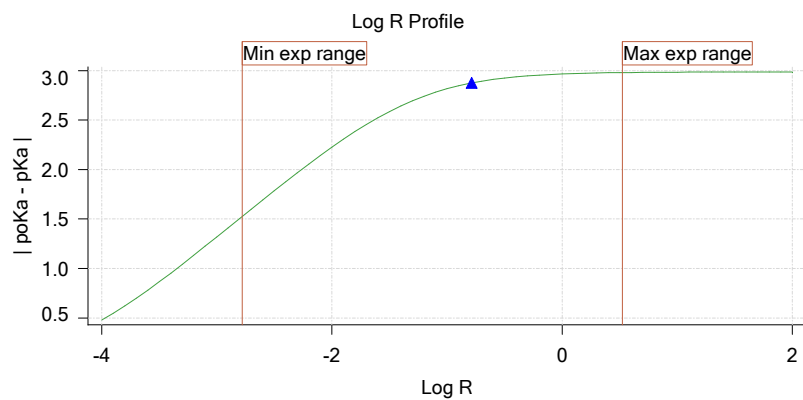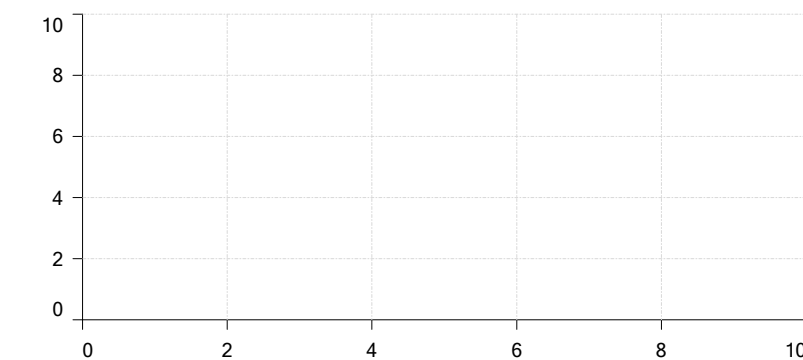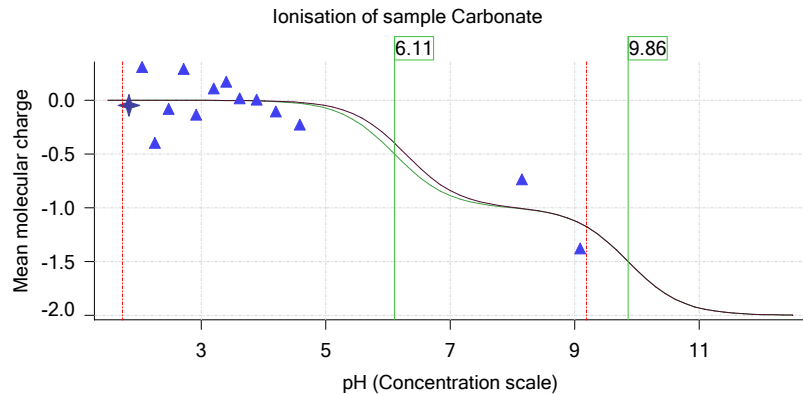

Sample name: **M02\_octanol** Experiment start time: **3/6/2018 5:41:59 PM**  
 Assay name: **pH-metric high logP** Analyst: **Dorothy Levorse**  
 Assay ID: **18C-06015** Instrument ID: **T312060**  
 Filename: **C:\Sirius\_T3\Mehtap\20180306\_exp30\_logP\_T3-2\18C-06015\_M02\_octanol\_pH-metric high logP.t3r**

## Assay Model

| Settings                          | Value        | Date/Time changed    | Imported from      |
|-----------------------------------|--------------|----------------------|--------------------|
| Sample name                       | M02_octanol  | 12/6/2017 4:20:03 PM | User entered value |
| Sample by                         | Weight       |                      | Default value      |
| Sample weight                     | 0.002110 g   | 3/6/2018 3:40:26 PM  | User entered value |
| Formula weight                    | 289.26 g/mol | 12/6/2017 4:20:03 PM | User entered value |
| Solubility                        | Unknown      |                      | Default value      |
| Molecular weight                  | 289.26       | 12/6/2017 4:20:03 PM | User entered value |
| Individual pKa ionic environments | No           |                      | Default value      |
| Number of pKas                    | 1            | 12/6/2017 4:20:03 PM | User entered value |
| Sample is a                       | Base         | 12/6/2017 4:20:03 PM | User entered value |
| pKa 1                             | 5.03         | 12/6/2017 4:20:03 PM | User entered value |
| logp (XH +)                       | 1.32         | 3/2/2018 3:38:13 PM  | User entered value |
| logP (neutral X)                  | 4.10         | 3/2/2018 3:38:07 PM  | User entered value |

## Events

| Time    | Event             | Water      | Acid       | Base       | Octanol    | pH    | dpH/dt   | pH R-squared | pH SD   | dpH/dt time         |
|---------|-------------------|------------|------------|------------|------------|-------|----------|--------------|---------|---------------------|
| 5:08.1  | Initial pH = 5.88 |            |            |            |            |       |          |              |         |                     |
| 8:07.7  | Data point 1      | 1.50000 mL | 0.05466 mL | 0.00583 mL | 0.01999 mL | 2.051 | 0.00164  | 0.09342      | 0.00026 | 10.0 s              |
| 8:53.9  | Data point 2      | 1.50000 mL | 0.05466 mL | 0.01947 mL | 0.01999 mL | 2.258 | -0.00031 | 0.00286      | 0.00029 | 10.5 s              |
| 9:30.0  | Data point 3      | 1.50000 mL | 0.05466 mL | 0.02897 mL | 0.01999 mL | 2.475 | -0.00173 | 0.32401      | 0.00015 | 10.5 s              |
| 10:06.1 | Data point 4      | 1.50000 mL | 0.05466 mL | 0.03537 mL | 0.01999 mL | 2.705 | -0.01180 | 0.86985      | 0.00062 | 10.0 s              |
| 10:41.7 | Data point 5      | 1.50000 mL | 0.05466 mL | 0.03996 mL | 0.01999 mL | 2.883 | -0.00877 | 0.93188      | 0.00045 | 10.0 s              |
| 11:17.2 | Data point 6      | 1.50000 mL | 0.05466 mL | 0.04363 mL | 0.01999 mL | 3.088 | -0.01598 | 0.80563      | 0.00088 | 10.0 s              |
| 11:52.7 | Data point 7      | 1.50000 mL | 0.05466 mL | 0.04652 mL | 0.01999 mL | 3.307 | -0.01840 | 0.83749      | 0.00099 | 12.0 s              |
| 12:30.2 | Data point 8      | 1.50000 mL | 0.05466 mL | 0.04871 mL | 0.01999 mL | 3.520 | -0.01804 | 0.93551      | 0.00092 | 16.0 s              |
| 13:11.8 | Data point 9      | 1.50000 mL | 0.05466 mL | 0.05031 mL | 0.01999 mL | 3.755 | -0.01934 | 0.98232      | 0.00096 | 20.0 s              |
| 14:07.6 | Data point 10     | 1.50000 mL | 0.05466 mL | 0.05111 mL | 0.01999 mL | 3.913 | -0.01849 | 0.91937      | 0.00095 | 33.5 s              |
| 15:06.5 | Data point 11     | 1.50000 mL | 0.05466 mL | 0.05151 mL | 0.01999 mL | 4.071 | -0.01887 | 0.88004      | 0.00099 | 34.0 s              |
| 16:06.0 | Data point 12     | 1.50000 mL | 0.05466 mL | 0.05179 mL | 0.01999 mL | 4.218 | -0.01661 | 0.84054      | 0.00089 | 37.5 s              |
| 17:19.3 | Data point 13     | 1.50000 mL | 0.05466 mL | 0.05212 mL | 0.01999 mL | 4.452 | -0.01927 | 0.92356      | 0.00099 | 40.0 s              |
| 18:29.8 | Data point 14     | 1.50000 mL | 0.05466 mL | 0.05233 mL | 0.01999 mL | 4.819 | -0.01879 | 0.88303      | 0.00099 | 43.5 s              |
| 19:38.8 | Data point 15     | 1.50000 mL | 0.05466 mL | 0.05242 mL | 0.01999 mL | 5.049 | -0.01780 | 0.88852      | 0.00093 | 46.5 s              |
| 20:55.9 | Data point 16     | 1.50000 mL | 0.05466 mL | 0.05256 mL | 0.01999 mL | 5.809 | -0.01703 | 0.77107      | 0.00096 | 49.5 s              |
| 22:16.0 | Data point 17     | 1.50000 mL | 0.05466 mL | 0.05266 mL | 0.01999 mL | 7.478 | -0.01823 | 0.89028      | 0.00095 | 57.0 s              |
| 23:53.8 | Data point 18     | 1.50000 mL | 0.05466 mL | 0.05275 mL | 0.01999 mL | 8.346 | -0.01804 | 0.80184      | 0.00099 | 52.0 s              |
| 25:21.6 | Data point 19     | 1.50000 mL | 0.05466 mL | 0.05285 mL | 0.01999 mL | 8.868 | -0.01663 | 0.74418      | 0.00095 | 36.0 s              |
| 26:33.4 | Data point 20     | 1.50000 mL | 0.05466 mL | 0.05294 mL | 0.01999 mL | 9.195 | -0.01836 | 0.90519      | 0.00095 | 30.0 s              |
| 27:57.2 | Data point 21     | 1.50000 mL | 0.11178 mL | 0.05294 mL | 0.05000 mL | 1.956 | -0.00466 | 0.28331      | 0.00043 | 10.0 s              |
| 28:43.5 | Data point 22     | 1.50000 mL | 0.11178 mL | 0.07159 mL | 0.05000 mL | 2.177 | -0.01190 | 0.78202      | 0.00066 | 10.0 s              |
| 29:19.2 | Data point 23     | 1.50000 mL | 0.11178 mL | 0.08389 mL | 0.05000 mL | 2.387 | -0.00289 | 0.10680      | 0.00044 | 10.0 s              |
| 29:54.8 | Data point 24     | 1.50000 mL | 0.11178 mL | 0.09214 mL | 0.05000 mL | 2.622 | -0.00997 | 0.76942      | 0.00056 | 10.5 s              |
| 30:30.9 | Data point 25     | 1.50000 mL | 0.11178 mL | 0.09774 mL | 0.05000 mL | 2.829 | -0.01166 | 0.83145      | 0.00063 | 10.5 s              |
| 31:06.8 | Data point 26     | 1.50000 mL | 0.11178 mL | 0.10181 mL | 0.05000 mL | 3.053 | -0.01274 | 0.93127      | 0.00065 | 10.0 s              |
| 31:42.3 | Data point 27     | 1.50000 mL | 0.11178 mL | 0.10468 mL | 0.05000 mL | 3.260 | -0.01427 | 0.92797      | 0.00073 | 10.5 s              |
| 32:18.2 | Data point 28     | 1.50000 mL | 0.11178 mL | 0.10670 mL | 0.05000 mL | 3.459 | -0.00720 | 0.86970      | 0.00038 | 10.0 s              |
| 32:53.6 | Data point 29     | 1.50000 mL | 0.11178 mL | 0.10811 mL | 0.05000 mL | 3.723 | -0.01606 | 0.92694      | 0.00082 | 10.5 s              |
| 33:45.0 | Data point 30     | 1.50000 mL | 0.11178 mL | 0.10889 mL | 0.05000 mL | 3.933 | -0.01092 | 0.83346      | 0.00059 | 10.5 s              |
| 34:20.9 | Data point 31     | 1.50000 mL | 0.11178 mL | 0.10941 mL | 0.05000 mL | 4.428 | -0.01931 | 0.91819      | 0.00100 | 18.5 s              |
| 35:10.1 | Data point 32     | 1.50000 mL | 0.11178 mL | 0.10992 mL | 0.05000 mL | 7.825 | -0.06475 | 0.99712      | 0.00320 | Timed out at 59.5 s |
| 36:45.7 | Data point 33     | 1.50000 mL | 0.11178 mL | 0.11011 mL | 0.05000 mL | 8.913 | -0.01987 | 0.97328      | 0.00099 | 31.5 s              |
| 37:37.5 | Data point 34     | 1.50000 mL | 0.11178 mL | 0.11011 mL | 0.05000 mL | 8.979 | -0.01914 | 0.92668      | 0.00098 | 33.0 s              |
| 39:14.6 | Data point 35     | 1.50000 mL | 0.17180 mL | 0.11011 mL | 0.30000 mL | 1.969 | 0.00151  | 0.00822      | 0.00082 | 10.5 s              |
| 40:01.6 | Data point 36     | 1.50000 mL | 0.17180 mL | 0.13090 mL | 0.30000 mL | 2.177 | -0.01405 | 0.55011      | 0.00094 | 11.0 s              |
| 40:38.3 | Data point 37     | 1.50000 mL | 0.17180 mL | 0.14450 mL | 0.30000 mL | 2.376 | -0.01463 | 0.74877      | 0.00083 | 10.0 s              |
| 41:13.9 | Data point 38     | 1.50000 mL | 0.17180 mL | 0.15369 mL | 0.30000 mL | 2.598 | -0.01418 | 0.73162      | 0.00082 | 10.5 s              |
| 41:50.1 | Data point 39     | 1.50000 mL | 0.17180 mL | 0.15974 mL | 0.30000 mL | 2.837 | 0.01255  | 0.62249      | 0.00079 | 10.0 s              |
| 42:35.9 | Data point 40     | 1.50000 mL | 0.17180 mL | 0.16336 mL | 0.30000 mL | 3.037 | 0.01290  | 0.63323      | 0.00080 | 10.5 s              |



## Assay Events

Sample name: **M02\_octanol**  
Assay name: **pH-metric high logP**  
Assay ID: **18C-06015**  
Filename: **C:\Sirius\_T3\Mehtap\20180306\_exp30\_logP\_T3-2\18C-06015\_M02\_octanol\_pH-metric high logP.t3r**

Experiment start time: **3/6/2018 5:41:59 PM**  
Analyst: **Dorothy Levorse**  
Instrument ID: **T312060**

## Events (continued)

| Time    | Event         | Water      | Acid       | Base       | Octanol    | pH    | dpH/dt   | pH R-squared | pH SD   | dpH/dt time            |
|---------|---------------|------------|------------|------------|------------|-------|----------|--------------|---------|------------------------|
| 43:11.9 | Data point 41 | 1.50000 mL | 0.17180 mL | 0.16597 mL | 0.30000 mL | 3.316 | -0.01737 | 0.82670      | 0.00094 | 14.5 s                 |
| 43:57.2 | Data point 42 | 1.50000 mL | 0.17180 mL | 0.16710 mL | 0.30000 mL | 3.518 | -0.01034 | 0.83937      | 0.00056 | 10.5 s                 |
| 44:48.5 | Data point 43 | 1.50000 mL | 0.17180 mL | 0.16799 mL | 0.30000 mL | 3.731 | 0.01219  | 0.49410      | 0.00086 | 10.0 s                 |
| 45:23.9 | Data point 44 | 1.50000 mL | 0.17180 mL | 0.16858 mL | 0.30000 mL | 4.002 | -0.01494 | 0.80259      | 0.00082 | 10.0 s                 |
| 46:04.5 | Data point 45 | 1.50000 mL | 0.17180 mL | 0.16900 mL | 0.30000 mL | 4.312 | -0.01556 | 0.81871      | 0.00085 | 10.5 s                 |
| 46:45.7 | Data point 46 | 1.50000 mL | 0.17180 mL | 0.16928 mL | 0.30000 mL | 4.694 | -0.01928 | 0.95047      | 0.00098 | 29.0 s                 |
| 47:50.4 | Data point 47 | 1.50000 mL | 0.17180 mL | 0.16980 mL | 0.30000 mL | 8.255 | -0.04492 | 0.97778      | 0.00224 | Timed out at<br>59.5 s |
| 49:31.3 | Data point 48 | 1.50000 mL | 0.17180 mL | 0.17034 mL | 0.30000 mL | 9.190 | -0.01473 | 0.61216      | 0.00093 | 15.0 s                 |
| 49:55.4 | Assay volumes | 1.50000 mL | 0.17180 mL | 0.17034 mL | 0.30000 mL |       |          |              |         |                        |

Sample name: **M02\_octanol**  
 Assay name: **pH-metric high logP**  
 Assay ID: **18C-06015**  
 Filename: **C:\Sirius\_T3\Mehtap\20180306\_exp30\_logP\_T3-2\18C-06015\_M02\_octanol\_pH-metric high logP.t3r**

Experiment start time: **3/6/2018 5:41:59 PM**  
 Analyst: **Dorothy Levorse**  
 Instrument ID: **T312060**

## Assay Settings

| Setting                             | Value              | Original Value | Date/Time changed | Imported from |
|-------------------------------------|--------------------|----------------|-------------------|---------------|
| <b>General Settings</b>             |                    |                |                   |               |
| Analyst name                        | Dorothy Levorse    |                |                   |               |
| <b>Standard Experiment Settings</b> |                    |                |                   |               |
| Number of titrations                | 3                  |                |                   |               |
| Minimum pH                          | 2.000              |                |                   |               |
| Maximum pH                          | 9.000              |                |                   |               |
| pH step between points of           | 0.200              |                |                   |               |
| Minimum titrant addition            | 0.00002 mL         |                |                   |               |
| Maximum titrant addition            | 0.10000 mL         |                |                   |               |
| Argon flow rate                     | 100%               |                |                   |               |
| Start titration using               | Cautious pH adjust |                |                   |               |
| <b>Advanced General Settings</b>    |                    |                |                   |               |
| Detect turbidity using              | None               |                |                   |               |
| Collect turbidity sensor data       | No                 |                |                   |               |
| Collect UV spectra                  | No                 |                |                   |               |
| Stir after titrant addition for     | 5 seconds          |                |                   |               |
| For titrant addition, stir at       | 10%                |                |                   |               |
| <b>Titration Pre-Dose</b>           |                    |                |                   |               |
| Titration pre-dose                  | None               |                |                   |               |
| <b>Assay Medium</b>                 |                    |                |                   |               |
| ISA water volume                    | 1.50 mL            |                |                   |               |
| Water added                         | Automatic          |                |                   |               |
| Partition solvent type              | Octanol            |                |                   |               |
| Partition volume                    | 0.020 mL           |                |                   |               |
| Partition solvent added             | Automatic          |                |                   |               |
| After partition addition, stir for  | 1 seconds          |                |                   |               |
| <b>Sample Sonication</b>            |                    |                |                   |               |
| Sonicate                            | Yes                |                |                   |               |
| Adjust pH for sonication            | No                 |                |                   |               |
| Sonicate for                        | 120 seconds        |                |                   |               |
| After sonication stir for           | 5 seconds          |                |                   |               |
| <b>Sample Dissolution</b>           |                    |                |                   |               |
| Perform a dissolution stage         | Yes                |                |                   |               |
| Adjust and hold pH for dissolution  | To start pH        |                |                   |               |
| Stir to dissolve for                | 120 seconds        |                |                   |               |
| For dissolution, stir at            | 10%                |                |                   |               |
| <b>Carbonate purge</b>              |                    |                |                   |               |
| Perform a carbonate purge           | No                 |                |                   |               |
| <b>Temperature Control</b>          |                    |                |                   |               |
| Wait for temperature                | Yes                |                |                   |               |
| Required start temperature          | 25.0°C             |                |                   |               |
| Acceptable deviation                | 0.5°C              |                |                   |               |
| Time to wait                        | 60 seconds         |                |                   |               |
| Stir speed of                       | 50%                |                |                   |               |
| <b>Titration 1</b>                  |                    |                |                   |               |
| Titrate from                        | Low to high pH     |                |                   |               |
| Adjust to start pH                  | Yes                |                |                   |               |
| After pH adjust stir for            | 30 seconds         |                |                   |               |
| Stir to allow partitioning for      | 15 seconds         |                |                   |               |
| Stirrer speed for partitioning      | 50%                |                |                   |               |
| <b>Titration 2</b>                  |                    |                |                   |               |
| Titrate from                        | Low to high pH     |                |                   |               |
| Add additional water                | 0.00 mL            |                |                   |               |
| Additional partition solvent volume | 0.030 mL           |                |                   |               |
| Additional partition solvent added  | Automatic          |                |                   |               |
| After pH adjust stir for            | 30 seconds         |                |                   |               |
| Stir to allow partitioning for      | 15 seconds         |                |                   |               |
| Stirrer speed for partitioning      | 55%                |                |                   |               |

Sample name: **M02\_octanol**  
 Assay name: **pH-metric high logP**  
 Assay ID: **18C-06015**  
 Filename: **C:\Sirius\_T3\Mehtap\20180306\_exp30\_logP\_T3-2\18C-06015\_M02\_octanol\_pH-metric high logP.t3r**

Experiment start time: **3/6/2018 5:41:59 PM**  
 Analyst: **Dorothy Levorse**  
 Instrument ID: **T312060**

## Assay Settings (continued)

| Setting                             | Value          | Original Value | Date/Time changed | Imported from |
|-------------------------------------|----------------|----------------|-------------------|---------------|
| <b>Titration 3</b>                  |                |                |                   |               |
| Titrate from                        | Low to high pH |                |                   |               |
| Add additional water                | 0.00 mL        |                |                   |               |
| Additional partition solvent volume | 0.250 mL       |                |                   |               |
| Additional partition solvent added  | Automatic      |                |                   |               |
| After pH adjust stir for            | 30 seconds     |                |                   |               |
| Stir to allow partitioning for      | 15 seconds     |                |                   |               |
| Stirrer speed for partitioning      | 60%            |                |                   |               |
| <b>Data Point Stability</b>         |                |                |                   |               |
| Stir during data point collection   | No             |                |                   |               |
| Delay before data point collection  | 0 seconds      |                |                   |               |
| Number of points to average         | 20 points      |                |                   |               |
| Time interval between points        | 0.50 seconds   |                |                   |               |
| Required maximum standard deviation | 0.00100 dpH/dt |                |                   |               |
| Stability timeout after             | 60 seconds     |                |                   |               |

## Calibration Settings

| Setting                   | Value  | Date/Time changed   | Imported from                                    |
|---------------------------|--------|---------------------|--------------------------------------------------|
| Four-Plus alpha           | 0.124  | 3/6/2018 5:41:59 PM | C:\Sirius_T3\18C-06006_Blank standardisation.t3r |
| Four-Plus S               | 0.9973 | 3/6/2018 5:41:59 PM | C:\Sirius_T3\18C-06006_Blank standardisation.t3r |
| Four-Plus jH              | 0.9    | 3/6/2018 5:41:59 PM | C:\Sirius_T3\18C-06006_Blank standardisation.t3r |
| Four-Plus jOH             | -0.7   | 3/6/2018 5:41:59 PM | C:\Sirius_T3\18C-06006_Blank standardisation.t3r |
| Base concentration factor | 1.000  | 3/6/2018 5:41:59 PM | C:\Sirius_T3\KOH18B27.t3r                        |
| Acid concentration factor | 0.989  | 3/6/2018 5:41:59 PM | C:\Sirius_T3\18C-06006_Blank standardisation.t3r |

## Instrument Settings

| Setting              | Value                      | Batch Id    | Install date           |
|----------------------|----------------------------|-------------|------------------------|
| Instrument owner     | Merck                      |             |                        |
| Instrument ID        | T312060                    |             |                        |
| Instrument type      | T3 Simulator               |             |                        |
| Software version     | 1.1.3.0                    |             |                        |
| Dispenser module     |                            | T3DM1200361 | 3/31/2009 5:24:52 AM   |
| Dispenser 0          | Water                      |             | 3/31/2009 5:25:05 AM   |
| Syringe volume       | 2.5 mL                     |             |                        |
| Firmware version     | 1.2.1(r2)                  |             |                        |
| Titrant              | Water (0.15 M KCl)         | 02-06-2018  | 2/27/2018 10:05:59 AM  |
| Dispenser 2          | Acid                       |             | 3/31/2009 5:25:11 AM   |
| Syringe volume       | 0.5 mL                     |             |                        |
| Firmware version     | 1.2.1(r2)                  |             |                        |
| Titrant              | Acid (0.5 M HCl)           | 02-27-2018  | 2/27/2018 10:27:22 AM  |
| Dispenser 1          | Base                       |             | 3/31/2009 5:25:21 AM   |
| Syringe volume       | 0.5 mL                     |             |                        |
| Firmware version     | 1.2.1(r2)                  |             |                        |
| Titrant              | Base (0.5 M KOH)           | 9/22/2017   | 2/27/2018 10:21:22 AM  |
| Dispenser 5          | Cosolvent                  |             | 3/31/2009 5:26:24 AM   |
| Syringe volume       | 2.5 mL                     |             |                        |
| Firmware version     | 1.2.1(r2)                  |             |                        |
| Distribution valve 5 | Distribution Valve         |             | 3/31/2009 5:28:19 AM   |
| Firmware version     | 1.1.3                      |             |                        |
| Port A               | Methanol (80%, 0.15 M KCl) | 02-08-2018  | 3/6/2018 9:28:59 AM    |
| Port B               | Cyclohexane                | 11-01-17    | 2/27/2018 10:37:57 AM  |
| Dispenser 3          | Buffer                     |             | 8/3/2010 5:05:16 AM    |
| Syringe volume       | 0.5 mL                     |             |                        |
| Firmware version     | 1.2.1(r2)                  |             |                        |
| Titrant              | Dodecane                   | 2018/01/31  | 2/28/2018 10:18:04 AM  |
| Dispenser 6          | Octanol                    |             | 10/22/2010 10:52:43 AM |



Sample name: **M02\_octanol** Experiment start time: **3/6/2018 5:41:59 PM**  
 Assay name: **pH-metric high logP** Analyst: **Dorothy Levorse**  
 Assay ID: **18C-06015** Instrument ID: **T312060**  
 Filename: **C:\Sirius\_T3\Mehtap\20180306\_exp30\_logP\_T3-2\18C-06015\_M02\_octanol\_pH-metric high logP.t3r**

## Instrument Settings (continued)

| Setting                                   | Value                      | Batch Id    | Install date           |
|-------------------------------------------|----------------------------|-------------|------------------------|
| Syringe volume                            | 0.5 mL                     |             |                        |
| Firmware version                          | 1.2.1(r2)                  |             |                        |
| Titrant                                   | Octanol                    | 01-31-2018  | 2/27/2018 9:59:35 AM   |
| Titration                                 |                            | T3TM1200161 | 3/31/2009 5:24:17 AM   |
| Horizontal axis firmware version          | 1.17 AI1DI2DO2 Stepper 2   |             |                        |
| Vertical axis firmware version            | 1.17 AI1DI2DO2 Stepper 2   |             |                        |
| Chassis I/O firmware version              | 1.11 AI1DI0DO4 Norgren I/O |             |                        |
| Probe I/O firmware version                | 1.1.1                      |             |                        |
| Electrode                                 | T3 Electrode               | T3E0923     | 1/23/2018 2:01:00 PM   |
| E0 calibration                            | +7.02 mV                   |             | 3/6/2018 5:42:27 PM    |
| Filling solution                          | 3M KCl                     | KCL097      | 3/6/2018 9:23:20 AM    |
| Liquids                                   |                            |             |                        |
| Wash 1                                    | 50% IPA:50% Water          |             | 3/6/2018 9:24:32 AM    |
| Wash 2                                    | 0.5% Triton X-100 in H2O   |             | 3/6/2018 9:24:35 AM    |
| Buffer position 1                         | pH7 Wash                   |             | 3/6/2018 9:24:38 AM    |
| Buffer position 2                         | pH 7                       |             | 3/6/2018 9:24:40 AM    |
| Storage position                          |                            |             | 3/6/2018 9:24:07 AM    |
| Wash water                                | 5.8e+003 mL                | 02-27-2018  | 2/27/2018 9:54:39 AM   |
| Waste                                     | 9.8e+003 mL                |             | 11/28/2017 10:36:29 AM |
| Temperature controller                    |                            |             | 8/5/2010 6:35:13 AM    |
| Turbidity detector                        |                            |             | 3/31/2009 5:24:45 AM   |
| Spectrometer                              |                            | 074811      | 11/23/2010 11:22:28 AM |
| Dip probe                                 |                            | 10196       |                        |
| Wavelength coefficient A0                 | 183.333                    |             |                        |
| Wavelength coefficient A1                 | 2.21568                    |             |                        |
| Wavelength coefficient A2                 | -0.000289308               |             |                        |
| Total lamp lit time                       | 123:01:40                  |             | 11/23/2010 11:22:28 AM |
| Calibrated on                             | 2/27/2018 10:40:38 AM      |             |                        |
| Integration time                          | 40                         |             |                        |
| Scans averaged                            | 10                         |             |                        |
| Autoloader                                |                            | T3AL1200345 | 11/10/2015 9:34:13 AM  |
| Left-right axis firmware version          | 1.17 AI1DI2DO2 Stepper 2   |             |                        |
| Front-back axis firmware version          | 1.17 AI1DI2DO2 Stepper 2   |             |                        |
| Vertical axis firmware version            | 1.17 AI1DI2DO2 Stepper 2   |             |                        |
| Chassis I/O firmware version              | 1.11 AI1DI0DO4 Norgren I/O |             |                        |
| Configuration                             |                            |             |                        |
| Alternate titration position              | Titration position         |             |                        |
| Alternate reference position              | Reference position         |             |                        |
| Maximum standard vial volume              | 3.50 mL                    |             |                        |
| Maximum alternate vial volume             | 25.00 mL                   |             |                        |
| Automatic action idle period              | 5 minute(s)                |             |                        |
| Titration tube volume                     | 1.3 mL                     |             |                        |
| Syringe flush count                       | 3.50                       |             |                        |
| Flowing wash pump volume                  | 20.0 mL                    |             |                        |
| Flowing wash stir duration                | 5 s                        |             |                        |
| Flowing wash stir speed                   | 30%                        |             |                        |
| Solvent wash stir duration                | 5 s                        |             |                        |
| Solvent wash stir speed                   | 30%                        |             |                        |
| Surfactant wash stir duration             | 5 s                        |             |                        |
| Surfactant wash stir speed                | 30%                        |             |                        |
| E0 calibration minimum number of points   | 10                         |             |                        |
| E0 calibration maximum standard deviation | 0.01500                    |             |                        |
| E0 calibration timeout period             | 60 s                       |             |                        |
| E0 calibration stir duration              | 5 s                        |             |                        |
| E0 calibration preparation stir speed     | 30%                        |             |                        |
| E0 calibration buffer wash stir duration  | 5 s                        |             |                        |
| E0 calibration buffer wash stir speed     | 30%                        |             |                        |
| E0 calibration reading stir speed         | 0%                         |             |                        |

Sample name: **M02\_octanol** Experiment start time: **3/6/2018 5:41:59 PM**  
 Assay name: **pH-metric high logP** Analyst: **Dorothy Levorse**  
 Assay ID: **18C-06015** Instrument ID: **T312060**  
 Filename: **C:\Sirius\_T3\Mehtap\20180306\_exp30\_logP\_T3-2\18C-06015\_M02\_octanol\_pH-metric high logP.t3r**

## Instrument Settings (continued)

| Setting                                     | Value   | Batch Id | Install date |
|---------------------------------------------|---------|----------|--------------|
| Spectrometer calibration stir duration      | 5 s     |          |              |
| Spectrometer calibration stir speed         | 30%     |          |              |
| Spectrometer calibration wash pump volume   | 20.0 mL |          |              |
| Spectrometer calibration wash stir duration | 5 s     |          |              |
| Spectrometer calibration wash stir speed    | 30%     |          |              |
| Overhead dispense height                    | 10000   |          |              |

## Refinement Settings

| Setting                        | Value    | Default value |
|--------------------------------|----------|---------------|
| Turbidity detection method     | None     | None          |
| Turbidity wavelength to assess | 500.0 nm | 500.0 nm      |
| Turbidity maximum absorbance   | 0.100    | 0.100         |
| Turbidity probe threshold      | 50.00    | 50.00         |

## Experiment Log

[49] Air gap released for Acid (0.5 M HCl)  
 [49] Air gap released for Base (0.5 M KOH)  
 [1:45] Air gap created for Water (0.15 M KCl)  
 [1:46] Air gap created for Acid (0.5 M HCl)  
 [1:46] Air gap created for Base (0.5 M KOH)  
 [1:46] Air gap released for Water (0.15 M KCl)  
 [1:50] Titrator arm moved over Titration position  
 [1:50] Titration 1 of 3  
 [1:50] Adding initial titrants  
 [1:50] Automatically add 1.50000 mL of water  
 [2:15] Dispensed 1.500000 mL of Water (0.15 M KCl)  
 [2:20] Titrator arm moved over Drain  
 [5:01] Titrator arm moved to Titration position  
 [5:01] Argon flow rate set to 100  
 [5:01] Stirrer speed set to 10  
 [5:06] Automatically add 0.02000 mL of Octanol  
 [5:07] Dispensed 0.019991 mL of Octanol  
 [5:08] Initial pH = 5.88  
 [5:08] Iterative adjust 5.88 -> 2.00  
 [5:08] pH 5.88 -> 2.00  
 [5:10] Air gap released for Acid (0.5 M HCl)  
 [5:10] Dispensed 0.054657 mL of Acid (0.5 M HCl)  
 [5:15] Holding pH 2.00  
 [7:15] Stirrer speed set to 0  
 [7:15] Stirrer speed set to 50  
 [7:15] Iterative adjust 1.95 -> 2.00  
 [7:15] pH 1.95 -> 2.00  
 [7:16] Air gap released for Base (0.5 M KOH)  
 [7:17] Dispensed 0.005833 mL of Base (0.5 M KOH)  
 [8:07] Stirrer speed set to 0  
 [8:17] Datapoint id 1 collected  
 [8:17] Stirrer speed set to 50  
 [8:22] pH 2.06 -> 2.26  
 [8:22] Using cautious pH adjust  
 [8:23] Dispensed 0.007197 mL of Base (0.5 M KOH)  
 [8:28] Stepping pH = 2.15  
 [8:28] Dispensed 0.005127 mL of Base (0.5 M KOH)  
 [8:33] Stepping pH = 2.23  
 [8:33] Dispensed 0.001317 mL of Base (0.5 M KOH)  
 [8:38] Stepping pH = 2.26  
 [8:54] Stirrer speed set to 0  
 [9:04] Datapoint id 2 collected

Sample name: **M02\_octanol**  
Assay name: **pH-metric high logP**  
Assay ID: **18C-06015**  
Filename: **C:\Sirius\_T3\Mehtap\20180306\_exp30\_logP\_T3-2\18C-06015\_M02\_octanol\_pH-metric high logP.t3r**

Experiment start time: **3/6/2018 5:41:59 PM**  
Analyst: **Dorothy Levorse**  
Instrument ID: **T312060**

## Experiment Log (continued)

[9:04] Charge balance equation is out by 5.2%  
[9:04] Stirrer speed set to 50  
[9:09] pH 2.26 -> 2.46  
[9:09] Using charge balance adjust  
[9:09] Dispensed 0.009501 mL of Base (0.5 M KOH)  
[9:30] Stirrer speed set to 0  
[9:40] Datapoint id 3 collected  
[9:40] Charge balance equation is out by 5.9%  
[9:40] Stirrer speed set to 50  
[9:45] pH 2.48 -> 2.68  
[9:45] Using charge balance adjust  
[9:46] Dispensed 0.006397 mL of Base (0.5 M KOH)  
[10:06] Stirrer speed set to 0  
[10:16] Datapoint id 4 collected  
[10:16] Charge balance equation is out by 10.6%  
[10:16] Stirrer speed set to 50  
[10:21] pH 2.71 -> 2.91  
[10:21] Using charge balance adjust  
[10:21] Dispensed 0.004586 mL of Base (0.5 M KOH)  
[10:41] Stirrer speed set to 0  
[10:51] Datapoint id 5 collected  
[10:51] Charge balance equation is out by -13.3%  
[10:51] Stirrer speed set to 50  
[10:56] pH 2.89 -> 3.09  
[10:56] Using charge balance adjust  
[10:57] Dispensed 0.003669 mL of Base (0.5 M KOH)  
[11:17] Stirrer speed set to 0  
[11:27] Datapoint id 6 collected  
[11:27] Charge balance equation is out by -1.0%  
[11:27] Stirrer speed set to 50  
[11:32] pH 3.09 -> 3.29  
[11:32] Using charge balance adjust  
[11:32] Dispensed 0.002893 mL of Base (0.5 M KOH)  
[11:52] Stirrer speed set to 0  
[12:04] Datapoint id 7 collected  
[12:04] Charge balance equation is out by 7.5%  
[12:04] Stirrer speed set to 50  
[12:09] pH 3.31 -> 3.51  
[12:09] Using charge balance adjust  
[12:10] Dispensed 0.002187 mL of Base (0.5 M KOH)  
[12:30] Stirrer speed set to 0  
[12:46] Datapoint id 8 collected  
[12:46] Charge balance equation is out by 5.8%  
[12:46] Stirrer speed set to 50  
[12:51] pH 3.52 -> 3.72  
[12:51] Using charge balance adjust  
[12:51] Dispensed 0.001599 mL of Base (0.5 M KOH)  
[13:11] Stirrer speed set to 0  
[13:32] Datapoint id 9 collected  
[13:32] Charge balance equation is out by 17.6%  
[13:32] Stirrer speed set to 50  
[13:37] pH 3.76 -> 3.96  
[13:37] Using cautious pH adjust  
[13:37] Dispensed 0.000541 mL of Base (0.5 M KOH)  
[13:42] Stepping pH = 3.90  
[13:42] Dispensed 0.000165 mL of Base (0.5 M KOH)  
[13:47] Stepping pH = 3.93  
[13:47] Dispensed 0.000094 mL of Base (0.5 M KOH)  
[13:52] Stepping pH = 3.95

Sample name: **M02\_octanol**  
Assay name: **pH-metric high logP**  
Assay ID: **18C-06015**  
Filename: **C:\Sirius\_T3\Mehtap\20180306\_exp30\_logP\_T3-2\18C-06015\_M02\_octanol\_pH-metric high logP.t3r**

Experiment start time: **3/6/2018 5:41:59 PM**  
Analyst: **Dorothy Levorse**  
Instrument ID: **T312060**

## Experiment Log (continued)

[14:07] Stirrer speed set to 0  
[14:41] Datapoint id 10 collected  
[14:41] Charge balance equation is out by 24.5%  
[14:41] Stirrer speed set to 50  
[14:46] pH 3.92 -> 4.12  
[14:46] Using cautious pH adjust  
[14:46] Dispensed 0.000400 mL of Base (0.5 M KOH)  
[14:51] Stepping pH = 4.14  
[15:06] Stirrer speed set to 0  
[15:40] Datapoint id 11 collected  
[15:40] Charge balance equation is out by 50.0%  
[15:40] Stirrer speed set to 50  
[15:45] pH 4.08 -> 4.28  
[15:45] Using cautious pH adjust  
[15:45] Dispensed 0.000282 mL of Base (0.5 M KOH)  
[15:51] Stepping pH = 4.29  
[16:06] Stirrer speed set to 0  
[16:43] Datapoint id 12 collected  
[16:43] Charge balance equation is out by 50.0%  
[16:43] Stirrer speed set to 50  
[16:48] pH 4.23 -> 4.43  
[16:48] Using cautious pH adjust  
[16:48] Dispensed 0.000212 mL of Base (0.5 M KOH)  
[16:53] Stepping pH = 4.38  
[16:54] Dispensed 0.000047 mL of Base (0.5 M KOH)  
[16:59] Stepping pH = 4.39  
[16:59] Dispensed 0.000071 mL of Base (0.5 M KOH)  
[17:04] Stepping pH = 4.48  
[17:19] Stirrer speed set to 0  
[17:59] Datapoint id 13 collected  
[17:59] Charge balance equation is out by 17.5%  
[17:59] Stirrer speed set to 50  
[18:04] pH 4.49 -> 4.69  
[18:04] Using cautious pH adjust  
[18:04] Dispensed 0.000118 mL of Base (0.5 M KOH)  
[18:09] Stepping pH = 4.58  
[18:09] Dispensed 0.000094 mL of Base (0.5 M KOH)  
[18:14] Stepping pH = 4.81  
[18:29] Stirrer speed set to 0  
[19:13] Datapoint id 14 collected  
[19:13] Charge balance equation is out by 11.3%  
[19:13] Stirrer speed set to 50  
[19:18] pH 4.89 -> 5.09  
[19:18] Using charge balance adjust  
[19:18] Dispensed 0.000094 mL of Base (0.5 M KOH)  
[19:38] Stirrer speed set to 0  
[20:25] Datapoint id 15 collected  
[20:25] Charge balance equation is out by -19.7%  
[20:25] Stirrer speed set to 50  
[20:30] pH 5.10 -> 5.30  
[20:30] Using cautious pH adjust  
[20:30] Dispensed 0.000047 mL of Base (0.5 M KOH)  
[20:35] Stepping pH = 5.11  
[20:35] Dispensed 0.000094 mL of Base (0.5 M KOH)  
[20:40] Stepping pH = 5.54  
[20:56] Stirrer speed set to 0  
[21:45] Datapoint id 16 collected  
[21:45] Charge balance equation is out by -87.8%  
[21:45] Stirrer speed set to 50

Sample name: **M02\_octanol**  
Assay name: **pH-metric high logP**  
Assay ID: **18C-06015**  
Filename: **C:\Sirius\_T3\Mehtap\20180306\_exp30\_logP\_T3-2\18C-06015\_M02\_octanol\_pH-metric high logP.t3r**

Experiment start time: **3/6/2018 5:41:59 PM**  
Analyst: **Dorothy Levorse**  
Instrument ID: **T312060**

## Experiment Log (continued)

[21:50] pH 6.10 -> 6.30  
[21:50] Using cautious pH adjust  
[21:50] Dispensed 0.000024 mL of Base (0.5 M KOH)  
[21:55] Stepping pH = 6.11  
[21:55] Dispensed 0.000071 mL of Base (0.5 M KOH)  
[22:01] Stepping pH = 6.60  
[22:16] Stirrer speed set to 0  
[23:13] Datapoint id 17 collected  
[23:13] Charge balance equation is out by -96.1%  
[23:13] Stirrer speed set to 50  
[23:18] pH 7.61 -> 7.81  
[23:18] Using cautious pH adjust  
[23:18] Dispensed 0.000024 mL of Base (0.5 M KOH)  
[23:23] Stepping pH = 7.64  
[23:23] Dispensed 0.000024 mL of Base (0.5 M KOH)  
[23:28] Stepping pH = 7.64  
[23:28] Dispensed 0.000024 mL of Base (0.5 M KOH)  
[23:33] Stepping pH = 7.71  
[23:33] Dispensed 0.000024 mL of Base (0.5 M KOH)  
[23:38] Stepping pH = 7.95  
[23:53] Stirrer speed set to 0  
[24:46] Datapoint id 18 collected  
[24:46] Charge balance equation is out by -1,094.0%  
[24:46] Stirrer speed set to 50  
[24:51] pH 8.41 -> 8.61  
[24:51] Using cautious pH adjust  
[24:51] Dispensed 0.000024 mL of Base (0.5 M KOH)  
[24:56] Stepping pH = 8.43  
[24:56] Dispensed 0.000024 mL of Base (0.5 M KOH)  
[25:01] Stepping pH = 8.43  
[25:01] Dispensed 0.000047 mL of Base (0.5 M KOH)  
[25:06] Stepping pH = 8.72  
[25:21] Stirrer speed set to 0  
[25:57] Datapoint id 19 collected  
[25:57] Charge balance equation is out by -649.6%  
[25:57] Stirrer speed set to 50  
[26:02] pH 8.94 -> 9.05  
[26:02] Using cautious pH adjust  
[26:03] Dispensed 0.000024 mL of Base (0.5 M KOH)  
[26:08] Stepping pH = 8.95  
[26:08] Dispensed 0.000024 mL of Base (0.5 M KOH)  
[26:13] Stepping pH = 8.97  
[26:13] Dispensed 0.000047 mL of Base (0.5 M KOH)  
[26:18] Stepping pH = 9.10  
[26:33] Stirrer speed set to 0  
[27:03] Datapoint id 20 collected  
[27:03] Charge balance equation is out by -476.6%  
[27:03] Titration 2 of 3  
[27:03] Adding initial titrants  
[27:03] Automatically add 0.03000 mL of Octanol  
[27:04] Dispensed 0.030009 mL of Octanol  
[27:04] Stirrer speed set to 10  
[27:05] Stirrer speed set to 55  
[27:05] Iterative adjust 9.21 -> 2.00  
[27:05] pH 9.21 -> 2.00  
[27:06] Dispensed 0.057126 mL of Acid (0.5 M HCl)  
[27:57] Stirrer speed set to 0  
[28:07] Datapoint id 21 collected  
[28:07] Stirrer speed set to 55

Sample name: **M02\_octanol**  
Assay name: **pH-metric high logP**  
Assay ID: **18C-06015**  
Filename: **C:\Sirius\_T3\Mehtap\20180306\_exp30\_logP\_T3-2\18C-06015\_M02\_octanol\_pH-metric high logP.t3r**

Experiment start time: **3/6/2018 5:41:59 PM**  
Analyst: **Dorothy Levorse**  
Instrument ID: **T312060**

## Experiment Log (continued)

[28:12] pH 1.97 -> 2.17  
[28:12] Using cautious pH adjust  
[28:12] Dispensed 0.009666 mL of Base (0.5 M KOH)  
[28:17] Stepping pH = 2.05  
[28:18] Dispensed 0.007361 mL of Base (0.5 M KOH)  
[28:23] Stepping pH = 2.14  
[28:23] Dispensed 0.001623 mL of Base (0.5 M KOH)  
[28:28] Stepping pH = 2.17  
[28:43] Stirrer speed set to 0  
[28:53] Datapoint id 22 collected  
[28:53] Charge balance equation is out by 3.5%  
[28:53] Stirrer speed set to 55  
[28:58] pH 2.18 -> 2.38  
[28:58] Using charge balance adjust  
[28:59] Dispensed 0.012300 mL of Base (0.5 M KOH)  
[29:19] Stirrer speed set to 0  
[29:29] Datapoint id 23 collected  
[29:29] Charge balance equation is out by 2.4%  
[29:29] Stirrer speed set to 55  
[29:34] pH 2.40 -> 2.60  
[29:34] Using charge balance adjust  
[29:34] Dispensed 0.008255 mL of Base (0.5 M KOH)  
[29:54] Stirrer speed set to 0  
[30:05] Datapoint id 24 collected  
[30:05] Charge balance equation is out by 12.9%  
[30:05] Stirrer speed set to 55  
[30:10] pH 2.63 -> 2.83  
[30:10] Using charge balance adjust  
[30:10] Dispensed 0.005597 mL of Base (0.5 M KOH)  
[30:31] Stirrer speed set to 0  
[30:41] Datapoint id 25 collected  
[30:41] Charge balance equation is out by 0.3%  
[30:41] Stirrer speed set to 55  
[30:46] pH 2.83 -> 3.03  
[30:46] Using charge balance adjust  
[30:46] Dispensed 0.004069 mL of Base (0.5 M KOH)  
[31:06] Stirrer speed set to 0  
[31:16] Datapoint id 26 collected  
[31:16] Charge balance equation is out by 8.9%  
[31:16] Stirrer speed set to 55  
[31:22] pH 3.06 -> 3.26  
[31:22] Using charge balance adjust  
[31:22] Dispensed 0.002869 mL of Base (0.5 M KOH)  
[31:42] Stirrer speed set to 0  
[31:52] Datapoint id 27 collected  
[31:52] Charge balance equation is out by 0.5%  
[31:52] Stirrer speed set to 55  
[31:57] pH 3.26 -> 3.46  
[31:57] Using charge balance adjust  
[31:58] Dispensed 0.002023 mL of Base (0.5 M KOH)  
[32:18] Stirrer speed set to 0  
[32:28] Datapoint id 28 collected  
[32:28] Charge balance equation is out by -2.6%  
[32:28] Stirrer speed set to 55  
[32:33] pH 3.47 -> 3.67  
[32:33] Using charge balance adjust  
[32:33] Dispensed 0.001411 mL of Base (0.5 M KOH)  
[32:53] Stirrer speed set to 0  
[33:04] Datapoint id 29 collected



Sample name: **M02\_octanol**  
Assay name: **pH-metric high logP**  
Assay ID: **18C-06015**  
Filename: **C:\Sirius\_T3\Mehtap\20180306\_exp30\_logP\_T3-2\18C-06015\_M02\_octanol\_pH-metric high logP.t3r**

Experiment start time: **3/6/2018 5:41:59 PM**  
Analyst: **Dorothy Levorse**  
Instrument ID: **T312060**

## Experiment Log (continued)

[33:04] Charge balance equation is out by 27.7%  
[33:04] Stirrer speed set to 55  
[33:09] pH 3.73 -> 3.93  
[33:09] Using cautious pH adjust  
[33:09] Dispensed 0.000423 mL of Base (0.5 M KOH)  
[33:14] Stepping pH = 3.84  
[33:14] Dispensed 0.000235 mL of Base (0.5 M KOH)  
[33:19] Stepping pH = 3.92  
[33:19] Dispensed 0.000047 mL of Base (0.5 M KOH)  
[33:24] Stepping pH = 3.92  
[33:24] Dispensed 0.000071 mL of Base (0.5 M KOH)  
[33:30] Stepping pH = 3.94  
[33:45] Stirrer speed set to 0  
[33:55] Datapoint id 30 collected  
[33:55] Charge balance equation is out by 7.6%  
[33:55] Stirrer speed set to 55  
[34:00] pH 3.95 -> 4.15  
[34:00] Using charge balance adjust  
[34:00] Dispensed 0.000517 mL of Base (0.5 M KOH)  
[34:21] Stirrer speed set to 0  
[34:39] Datapoint id 31 collected  
[34:39] Charge balance equation is out by 139.7%  
[34:39] Stirrer speed set to 55  
[34:44] pH 4.47 -> 4.67  
[34:44] Using cautious pH adjust  
[34:44] Dispensed 0.000094 mL of Base (0.5 M KOH)  
[34:49] Stepping pH = 4.47  
[34:50] Dispensed 0.000423 mL of Base (0.5 M KOH)  
[34:55] Stepping pH = 7.49  
[35:10] Stirrer speed set to 0  
[36:10] Datapoint id 32 collected  
[36:10] Charge balance equation is out by -201.6%  
[36:10] Stirrer speed set to 55  
[36:15] pH 8.18 -> 8.38  
[36:15] Using cautious pH adjust  
[36:15] Dispensed 0.000024 mL of Base (0.5 M KOH)  
[36:20] Stepping pH = 8.14  
[36:20] Dispensed 0.000024 mL of Base (0.5 M KOH)  
[36:25] Stepping pH = 8.10  
[36:25] Dispensed 0.000141 mL of Base (0.5 M KOH)  
[36:30] Stepping pH = 8.92  
[36:45] Stirrer speed set to 0  
[37:17] Datapoint id 33 collected  
[37:17] Charge balance equation is out by -2,089.2%  
[37:17] Stirrer speed set to 55  
[37:22] pH 9.03 -> 9.05  
[37:22] Using cautious pH adjust  
[37:37] Stirrer speed set to 0  
[38:10] Datapoint id 34 collected  
[38:10] Charge balance equation is out by 100.0%  
[38:10] Titration 3 of 3  
[38:10] Adding initial titrants  
[38:10] Automatically add 0.25000 mL of Octanol  
[38:16] Dispensed 0.250000 mL of Octanol  
[38:16] Stirrer speed set to 10  
[38:17] Stirrer speed set to 60  
[38:17] Iterative adjust 9.00 -> 2.00  
[38:17] pH 9.00 -> 2.00  
[38:19] Dispensed 0.058725 mL of Acid (0.5 M HCl)

Sample name: **M02\_octanol**  
Assay name: **pH-metric high logP**  
Assay ID: **18C-06015**  
Filename: **C:\Sirius\_T3\Mehtap\20180306\_exp30\_logP\_T3-2\18C-06015\_M02\_octanol\_pH-metric high logP.t3r**

Experiment start time: **3/6/2018 5:41:59 PM**  
Analyst: **Dorothy Levorse**  
Instrument ID: **T312060**

## Experiment Log (continued)

[38:24] pH 2.01 -> 2.00  
[38:24] Dispensed 0.001294 mL of Acid (0.5 M HCl)  
[39:14] Stirrer speed set to 0  
[39:25] Datapoint id 35 collected  
[39:25] Stirrer speed set to 60  
[39:30] pH 1.98 -> 2.18  
[39:30] Using cautious pH adjust  
[39:30] Dispensed 0.010254 mL of Base (0.5 M KOH)  
[39:35] Stepping pH = 2.06  
[39:36] Dispensed 0.008043 mL of Base (0.5 M KOH)  
[39:41] Stepping pH = 2.15  
[39:41] Dispensed 0.002493 mL of Base (0.5 M KOH)  
[39:46] Stepping pH = 2.18  
[40:01] Stirrer speed set to 0  
[40:12] Datapoint id 36 collected  
[40:12] Charge balance equation is out by -1.3%  
[40:12] Stirrer speed set to 60  
[40:17] pH 2.18 -> 2.38  
[40:17] Using charge balance adjust  
[40:18] Dispensed 0.013594 mL of Base (0.5 M KOH)  
[40:38] Stirrer speed set to 0  
[40:48] Datapoint id 37 collected  
[40:48] Charge balance equation is out by -1.2%  
[40:48] Stirrer speed set to 60  
[40:53] pH 2.38 -> 2.58  
[40:53] Using charge balance adjust  
[40:53] Dispensed 0.009196 mL of Base (0.5 M KOH)  
[41:14] Stirrer speed set to 0  
[41:24] Datapoint id 38 collected  
[41:24] Charge balance equation is out by 9.4%  
[41:24] Stirrer speed set to 60  
[41:29] pH 2.60 -> 2.80  
[41:29] Using charge balance adjust  
[41:30] Dispensed 0.006044 mL of Base (0.5 M KOH)  
[41:50] Stirrer speed set to 0  
[42:00] Datapoint id 39 collected  
[42:00] Charge balance equation is out by 16.8%  
[42:00] Stirrer speed set to 60  
[42:05] pH 2.85 -> 3.05  
[42:05] Using cautious pH adjust  
[42:05] Dispensed 0.001929 mL of Base (0.5 M KOH)  
[42:10] Stepping pH = 2.94  
[42:10] Dispensed 0.001435 mL of Base (0.5 M KOH)  
[42:15] Stepping pH = 3.03  
[42:15] Dispensed 0.000259 mL of Base (0.5 M KOH)  
[42:20] Stepping pH = 3.04  
[42:36] Stirrer speed set to 0  
[42:46] Datapoint id 40 collected  
[42:46] Charge balance equation is out by 5.9%  
[42:46] Stirrer speed set to 60  
[42:51] pH 3.05 -> 3.25  
[42:51] Using charge balance adjust  
[42:51] Dispensed 0.002611 mL of Base (0.5 M KOH)  
[43:12] Stirrer speed set to 0  
[43:26] Datapoint id 41 collected  
[43:26] Charge balance equation is out by 35.1%  
[43:26] Stirrer speed set to 60  
[43:31] pH 3.32 -> 3.52  
[43:31] Using cautious pH adjust



Sample name: **M02\_octanol**  
Assay name: **pH-metric high logP**  
Assay ID: **18C-06015**  
Filename: **C:\Sirius\_T3\Mehtap\20180306\_exp30\_logP\_T3-2\18C-06015\_M02\_octanol\_pH-metric high logP.t3r**

Experiment start time: **3/6/2018 5:41:59 PM**  
Analyst: **Dorothy Levorse**  
Instrument ID: **T312060**

## Experiment Log (continued)

[43:31] Dispensed 0.000729 mL of Base (0.5 M KOH)  
[43:36] Stepping pH = 3.43  
[43:37] Dispensed 0.000400 mL of Base (0.5 M KOH)  
[43:42] Stepping pH = 3.52  
[43:57] Stirrer speed set to 0  
[44:07] Datapoint id 42 collected  
[44:07] Charge balance equation is out by 22.8%  
[44:07] Stirrer speed set to 60  
[44:12] pH 3.53 -> 3.73  
[44:12] Using cautious pH adjust  
[44:12] Dispensed 0.000470 mL of Base (0.5 M KOH)  
[44:18] Stepping pH = 3.63  
[44:18] Dispensed 0.000306 mL of Base (0.5 M KOH)  
[44:23] Stepping pH = 3.71  
[44:23] Dispensed 0.000047 mL of Base (0.5 M KOH)  
[44:28] Stepping pH = 3.72  
[44:28] Dispensed 0.000071 mL of Base (0.5 M KOH)  
[44:33] Stepping pH = 3.73  
[44:48] Stirrer speed set to 0  
[44:58] Datapoint id 43 collected  
[44:58] Charge balance equation is out by 5.5%  
[44:58] Stirrer speed set to 60  
[45:03] pH 3.75 -> 3.95  
[45:03] Using charge balance adjust  
[45:03] Dispensed 0.000588 mL of Base (0.5 M KOH)  
[45:24] Stirrer speed set to 0  
[45:34] Datapoint id 44 collected  
[45:34] Charge balance equation is out by 26.0%  
[45:34] Stirrer speed set to 60  
[45:39] pH 4.03 -> 4.23  
[45:39] Using cautious pH adjust  
[45:39] Dispensed 0.000165 mL of Base (0.5 M KOH)  
[45:44] Stepping pH = 4.07  
[45:44] Dispensed 0.000259 mL of Base (0.5 M KOH)  
[45:49] Stepping pH = 4.31  
[46:04] Stirrer speed set to 0  
[46:15] Datapoint id 45 collected  
[46:15] Charge balance equation is out by -34.4%  
[46:15] Stirrer speed set to 60  
[46:20] pH 4.37 -> 4.57  
[46:20] Using cautious pH adjust  
[46:20] Dispensed 0.000071 mL of Base (0.5 M KOH)  
[46:25] Stepping pH = 4.37  
[46:25] Dispensed 0.000212 mL of Base (0.5 M KOH)  
[46:30] Stepping pH = 4.68  
[46:45] Stirrer speed set to 0  
[47:14] Datapoint id 46 collected  
[47:14] Charge balance equation is out by -97.4%  
[47:14] Stirrer speed set to 60  
[47:19] pH 4.84 -> 5.04  
[47:19] Using cautious pH adjust  
[47:19] Dispensed 0.000024 mL of Base (0.5 M KOH)  
[47:25] Stepping pH = 4.84  
[47:25] Dispensed 0.000141 mL of Base (0.5 M KOH)  
[47:30] Stepping pH = 4.86  
[47:30] Dispensed 0.000353 mL of Base (0.5 M KOH)  
[47:35] Stepping pH = 8.18  
[47:50] Stirrer speed set to 0  
[48:50] Datapoint id 47 collected

|              |                                                                                                   |                        |                            |
|--------------|---------------------------------------------------------------------------------------------------|------------------------|----------------------------|
| Sample name: | <b>M02_octanol</b>                                                                                | Experiment start time: | <b>3/6/2018 5:41:59 PM</b> |
| Assay name:  | <b>pH-metric high logP</b>                                                                        | Analyst:               | <b>Dorothy Levorse</b>     |
| Assay ID:    | <b>18C-06015</b>                                                                                  | Instrument ID:         | <b>T312060</b>             |
| Filename:    | <b>C:\Sirius_T3\Mehtap\20180306_exp30_logP_T3-2\18C-06015_M02_octanol_pH-metric high logP.t3r</b> |                        |                            |

---

**Experiment Log (continued)**

[48:50] Charge balance equation is out by -866.5%  
[48:50] Stirrer speed set to 60  
[48:55] pH 8.41 -> 8.61  
[48:55] Using cautious pH adjust  
[48:55] Dispensed 0.000024 mL of Base (0.5 M KOH)  
[49:00] Stepping pH = 8.38  
[49:00] Dispensed 0.000047 mL of Base (0.5 M KOH)  
[49:05] Stepping pH = 8.35  
[49:06] Dispensed 0.000235 mL of Base (0.5 M KOH)  
[49:11] Stepping pH = 8.46  
[49:11] Dispensed 0.000235 mL of Base (0.5 M KOH)  
[49:16] Stepping pH = 9.22  
[49:31] Stirrer speed set to 0  
[49:46] Datapoint id 48 collected  
[49:46] Charge balance equation is out by -3,486.6%  
[49:46] Argon flow rate set to 0  
[49:50] Titrator arm moved over Titration position  
[50:12] The autoloader failed to pick at location "Sample position"

---
