# Supplementary material for: Octanol-water partition coefficient measurements for the SAMPL6 Blind Prediction Challenge
Source: bioRxiv or medRxiv preprint supplement (doi:10.1101/757393), 2019-12-02
Supplement: Supplementary file [file media-2.zip]

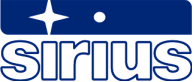

Sample name: **M04\_octanol**  
Assay name: **pH-metric high logP**  
Assay ID: **18C-24002**  
Filename: **C:\Sirius\_T3\Mehtap\20180323\_exp33\_logP\_T3-2\18C-24002\_M04\_octanol\_pH-metric high logP.t3r**

Experiment start time: **3/24/2018 1:34:06 AM**  
Analyst: **Dorothy Levorse**  
Instrument ID: **T312060**

## pH-metric Result

logP (XH +) 0.82 ±0.06 (n=50)  
logP (neutral X) 4.04 ±0.02 (n=50)  
RMSD 0.362

## 18C-24002 Points 1 to 24

M04\_octanol concentration factor 0.923  
Carbonate 0.1572 mM  
Acidity error -0.23457 mM

## 18C-24002 Points 25 to 51

M04\_octanol concentration factor 0.920  
Carbonate 0.1065 mM  
Acidity error -0.29812 mM

## 18C-24002 Points 52 to 75

M04\_octanol concentration factor 0.952  
Carbonate 0.1039 mM  
Acidity error -0.10230 mM

## Warnings and errors

Errors None  
Warnings None

## Sample logD and percent species

| pH     | M04_octanol<br>logD | M04_octanol<br>M04_octanolH | M04_octanol<br>M04_octanol | M04_octanol<br>M04_octanolH* | M04_octanol<br>M04_octanol* | Comment    |
|--------|---------------------|-----------------------------|----------------------------|------------------------------|-----------------------------|------------|
| 1.000  | 0.83                | 12.93 %                     | 0.00 %                     | 85.56 %                      | 1.52 %                      | Stomach pH |
| 1.200  | 0.83                | 12.81 %                     | 0.00 %                     | 84.80 %                      | 2.38 %                      |            |
| 2.000  | 0.89                | 11.37 %                     | 0.00 %                     | 75.28 %                      | 13.34 %                     |            |
| 3.000  | 1.26                | 5.17 %                      | 0.01 %                     | 34.21 %                      | 60.62 %                     |            |
| 4.000  | 2.09                | 0.80 %                      | 0.01 %                     | 5.30 %                       | 93.89 %                     |            |
| 5.000  | 3.03                | 0.08 %                      | 0.01 %                     | 0.56 %                       | 99.35 %                     | Blood pH   |
| 6.000  | 3.75                | 0.01 %                      | 0.01 %                     | 0.06 %                       | 99.93 %                     |            |
| 6.500  | 3.93                | 0.00 %                      | 0.01 %                     | 0.02 %                       | 99.97 %                     |            |
| 7.000  | 4.00                | 0.00 %                      | 0.01 %                     | 0.01 %                       | 99.98 %                     |            |
| 7.400  | 4.02                | 0.00 %                      | 0.01 %                     | 0.00 %                       | 99.99 %                     |            |
| 8.000  | 4.04                | 0.00 %                      | 0.01 %                     | 0.00 %                       | 99.99 %                     |            |
| 9.000  | 4.04                | 0.00 %                      | 0.01 %                     | 0.00 %                       | 99.99 %                     |            |
| 10.000 | 4.04                | 0.00 %                      | 0.01 %                     | 0.00 %                       | 99.99 %                     |            |
| 11.000 | 4.04                | 0.00 %                      | 0.01 %                     | 0.00 %                       | 99.99 %                     |            |
| 12.000 | 4.04                | 0.00 %                      | 0.01 %                     | 0.00 %                       | 99.99 %                     |            |

Sample name: **M04\_octanol**  
 Assay name: **pH-metric high logP**  
 Assay ID: **18C-24002**  
 Filename: **C:\Sirius\_T3\Mehtap\20180323\_exp33\_logP\_T3-2\18C-24002\_M04\_octanol\_pH-metric high logP.t3r**

Experiment start time: **3/24/2018 1:34:06 AM**  
 Analyst: **Dorothy Levorse**  
 Instrument ID: **T312060**

## Graphs

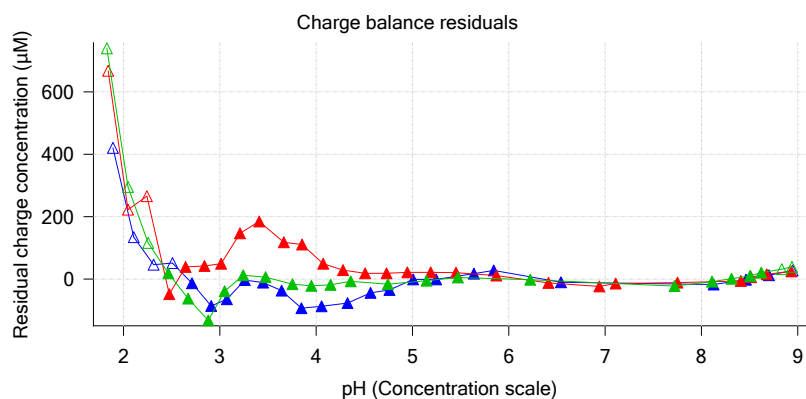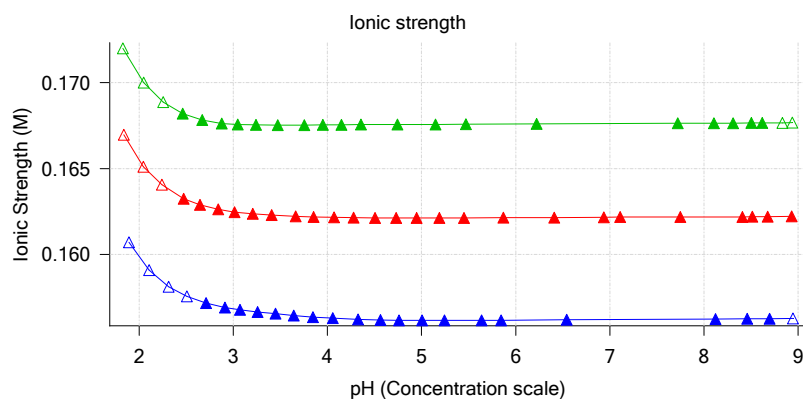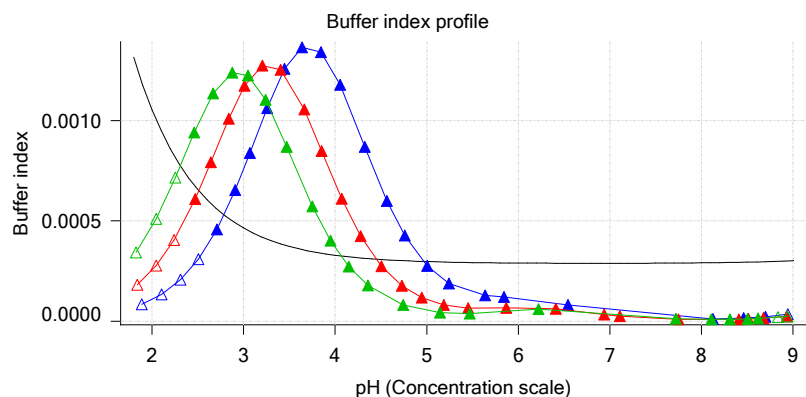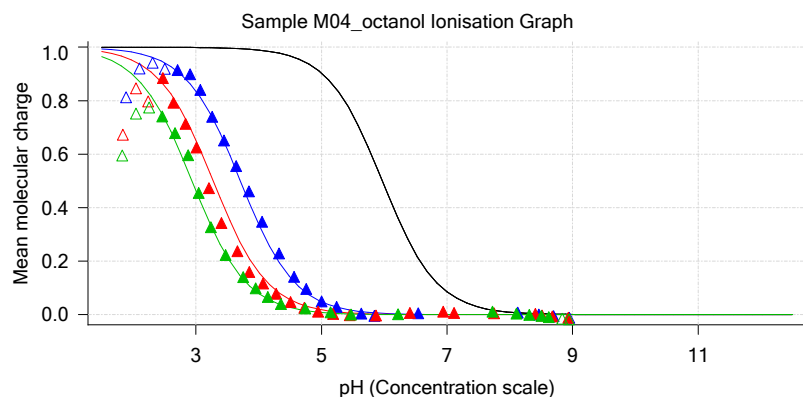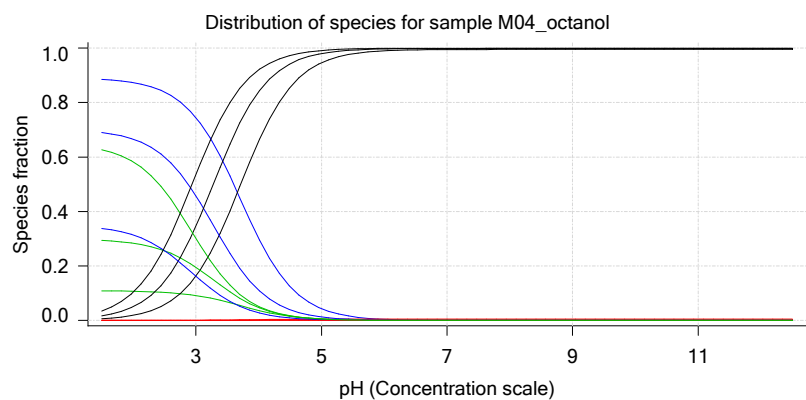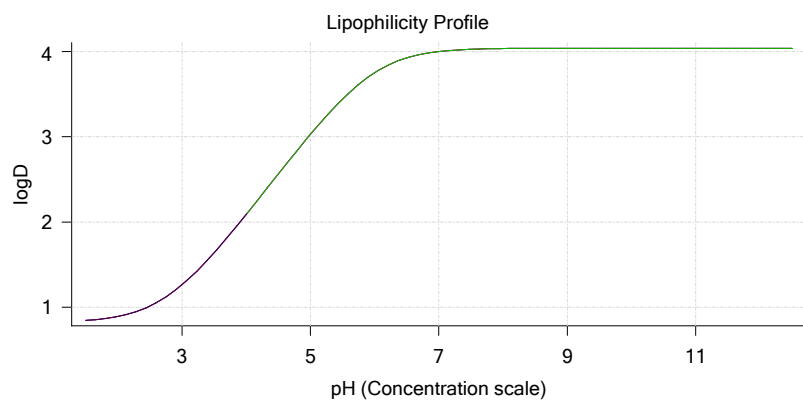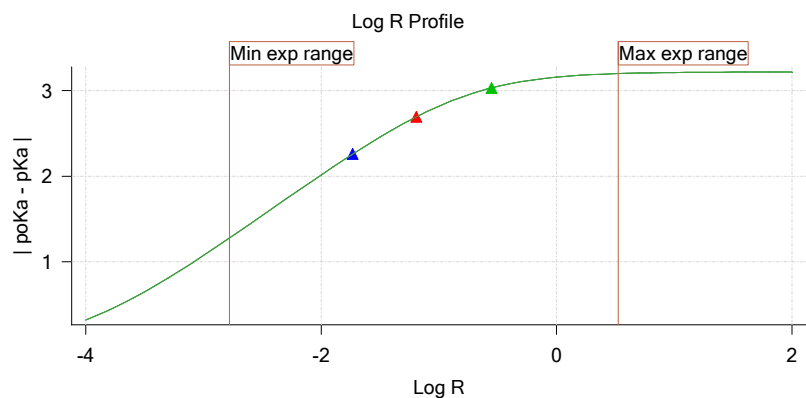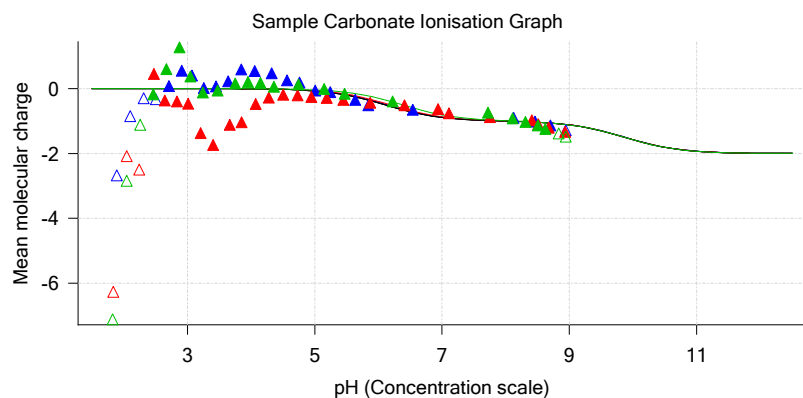

Sample name: **M04\_octanol**  
 Assay name: **pH-metric high logP**  
 Assay ID: **18C-24002**  
 Filename: **C:\Sirius\_T3\Mehtap\20180323\_exp33\_logP\_T3-2\18C-24002\_M04\_octanol\_pH-metric high logP.t3r**

Experiment start time: **3/24/2018 1:34:06 AM**  
 Analyst: **Dorothy Levorse**  
 Instrument ID: **T312060**

## Graphs (continued)

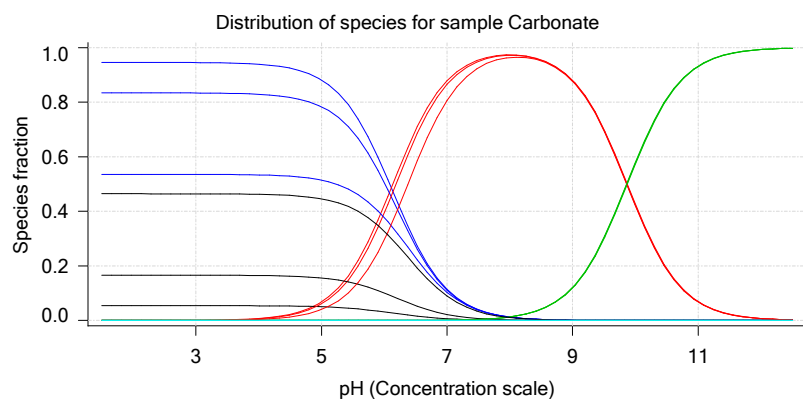

Sample name: **M04\_octanol**  
 Assay name: **pH-metric high logP**  
 Assay ID: **18C-24002**  
 Filename: **C:\Sirius\_T3\Mehtap\20180323\_exp33\_logP\_T3-2\18C-24002\_M04\_octanol\_pH-metric high logP.t3r**

Experiment start time: **3/24/2018 1:34:06 AM**  
 Analyst: **Dorothy Levorse**  
 Instrument ID: **T312060**

## pH-metric high logP Titration 1 of 3 18C-24002 Points 1 to 24

### Overall results

RMSD 0.282  
 Average ionic strength 0.156 M  
 Average temperature 24.9°C  
 Partition ratio 0.0186 : 1  
 Analyte concentration range 2528.6 µM to 2603.3 µM  
 Total points considered 19 of 24

### Warnings and errors

Errors None  
 Warnings None

### Four-Plus parameters

| Parameter | Value  | Date/Time            | File                      |
|-----------|--------|----------------------|---------------------------|
| Alpha     | 0.119  | 3/24/2018 1:34:06 AM | C:\Sirius_T3\HCl18C23.t3r |
| S         | 0.9972 | 3/24/2018 1:34:06 AM | C:\Sirius_T3\HCl18C23.t3r |
| jH        | 0.9    | 3/24/2018 1:34:06 AM | C:\Sirius_T3\HCl18C23.t3r |
| jOH       | -0.3   | 3/24/2018 1:34:06 AM | C:\Sirius_T3\HCl18C23.t3r |

### Titrants

| Concentration | Value    | Date/Time            | File                      |
|---------------|----------|----------------------|---------------------------|
| 0.50 M HCl    | 0.997124 | 3/24/2018 1:34:06 AM | C:\Sirius_T3\HCl18C23.t3r |
| 0.50 M KOH    | 1.003190 | 3/24/2018 1:34:06 AM | C:\Sirius_T3\KOH18C23.t3r |

### Sample

|                                  |       |
|----------------------------------|-------|
| M04_octanol concentration factor | 0.923 |
| Base pKa 1                       | 5.97  |
| logP (XH +)                      | 0.19  |
| logP (neutral X)                 | 3.95  |

### Sample graphs

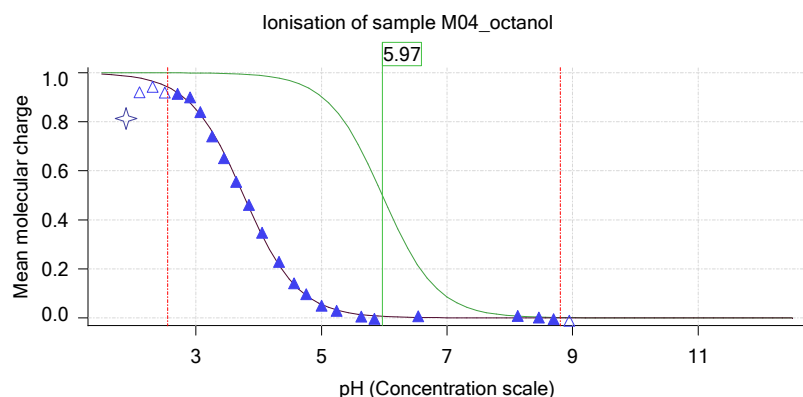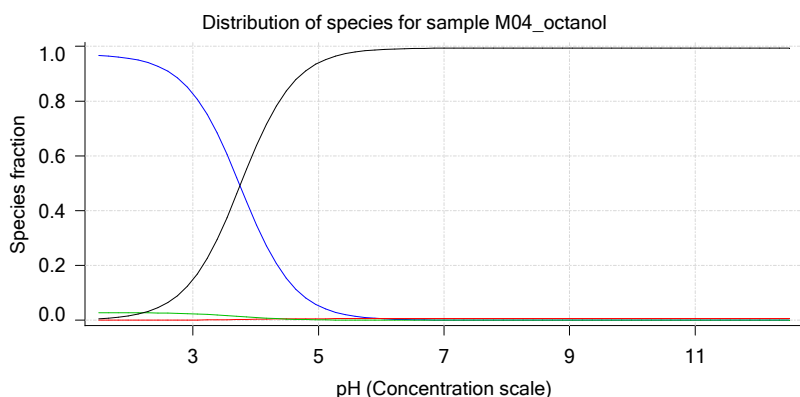

Sample name: **M04\_octanol**  
 Assay name: **pH-metric high logP**  
 Assay ID: **18C-24002**  
 Filename: **C:\Sirius\_T3\Mehtap\20180323\_exp33\_logP\_T3-2\18C-24002\_M04\_octanol\_pH-metric high logP.t3r**

Experiment start time: **3/24/2018 1:34:06 AM**  
 Analyst: **Dorothy Levorse**  
 Instrument ID: **T312060**

## Sample graphs (continued)

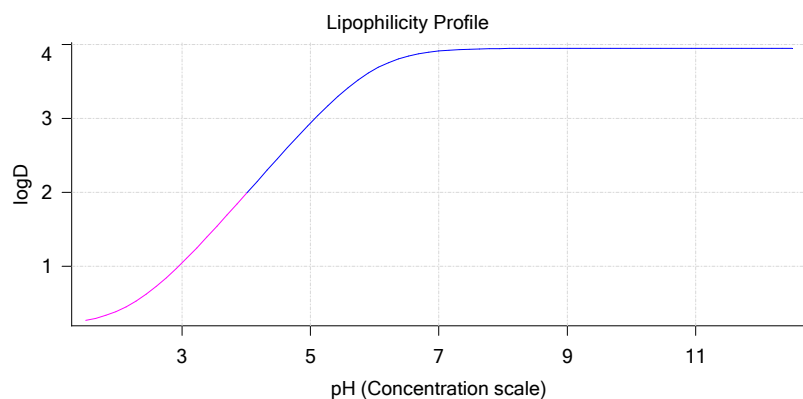

## Sample logD and percent species

| pH     | M04_octanol<br>logD | M04_octanol<br>M04_octanolH | M04_octanol<br>M04_octanol | M04_octanol<br>M04_octanolH* | M04_octanol<br>M04_octanol* | Comment    |
|--------|---------------------|-----------------------------|----------------------------|------------------------------|-----------------------------|------------|
| 1.000  | 0.22                | 97.04 %                     | 0.00 %                     | 2.79 %                       | 0.17 %                      | Stomach pH |
| 1.200  | 0.23                | 96.94 %                     | 0.00 %                     | 2.79 %                       | 0.27 %                      |            |
| 2.000  | 0.40                | 95.55 %                     | 0.01 %                     | 2.75 %                       | 1.70 %                      |            |
| 3.000  | 1.05                | 82.83 %                     | 0.09 %                     | 2.38 %                       | 14.70 %                     |            |
| 4.000  | 1.98                | 35.54 %                     | 0.38 %                     | 1.02 %                       | 63.06 %                     |            |
| 5.000  | 2.94                | 5.30 %                      | 0.57 %                     | 0.15 %                       | 93.98 %                     | Blood pH   |
| 6.000  | 3.66                | 0.56 %                      | 0.60 %                     | 0.02 %                       | 98.83 %                     |            |
| 6.500  | 3.84                | 0.18 %                      | 0.60 %                     | 0.01 %                       | 99.22 %                     |            |
| 7.000  | 3.91                | 0.06 %                      | 0.60 %                     | 0.00 %                       | 99.34 %                     |            |
| 7.400  | 3.93                | 0.02 %                      | 0.60 %                     | 0.00 %                       | 99.38 %                     |            |
| 8.000  | 3.95                | 0.01 %                      | 0.60 %                     | 0.00 %                       | 99.39 %                     |            |
| 9.000  | 3.95                | 0.00 %                      | 0.60 %                     | 0.00 %                       | 99.40 %                     |            |
| 10.000 | 3.95                | 0.00 %                      | 0.60 %                     | 0.00 %                       | 99.40 %                     |            |
| 11.000 | 3.95                | 0.00 %                      | 0.60 %                     | 0.00 %                       | 99.40 %                     |            |
| 12.000 | 3.95                | 0.00 %                      | 0.60 %                     | 0.00 %                       | 99.40 %                     |            |

## Carbonate and acidity

 Carbonate 0.157 mM  
 Acidity error -0.235 mM

## Other graphs

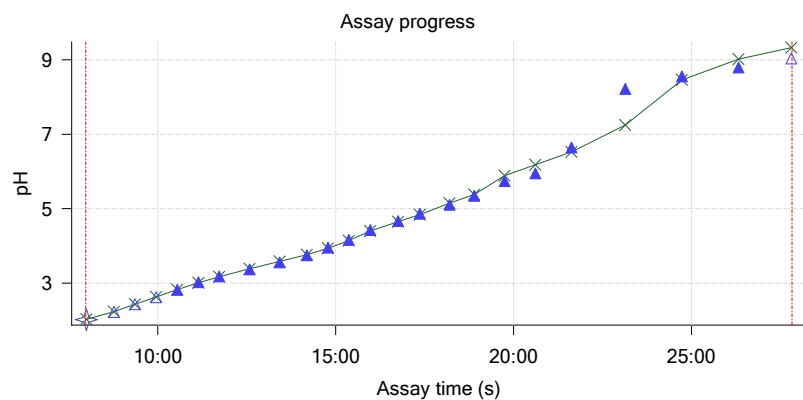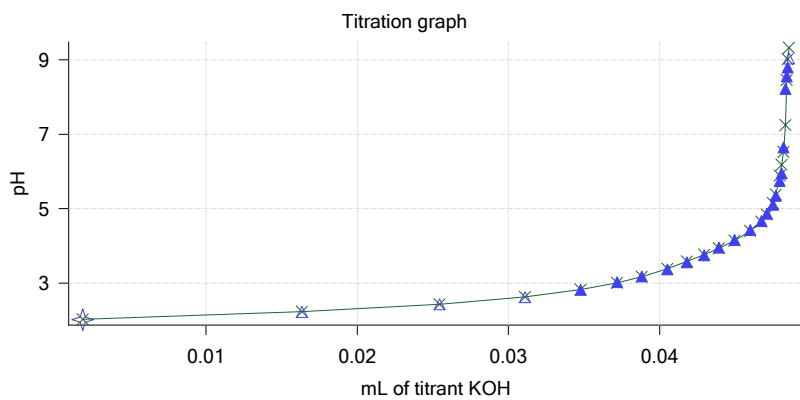

Sample name: **M04\_octanol**  
 Assay name: **pH-metric high logP**  
 Assay ID: **18C-24002**  
 Filename: **C:\Sirius\_T3\Mehtap\20180323\_exp33\_logP\_T3-2\18C-24002\_M04\_octanol\_pH-metric high logP.t3r**

Experiment start time: **3/24/2018 1:34:06 AM**  
 Analyst: **Dorothy Levorse**  
 Instrument ID: **T312060**

## Other graphs (continued)

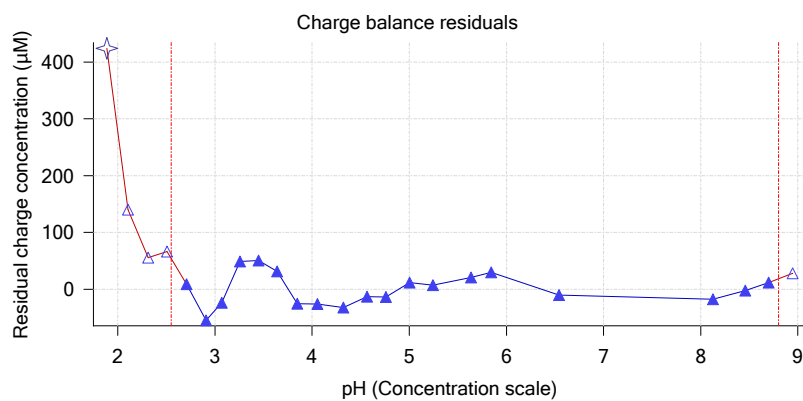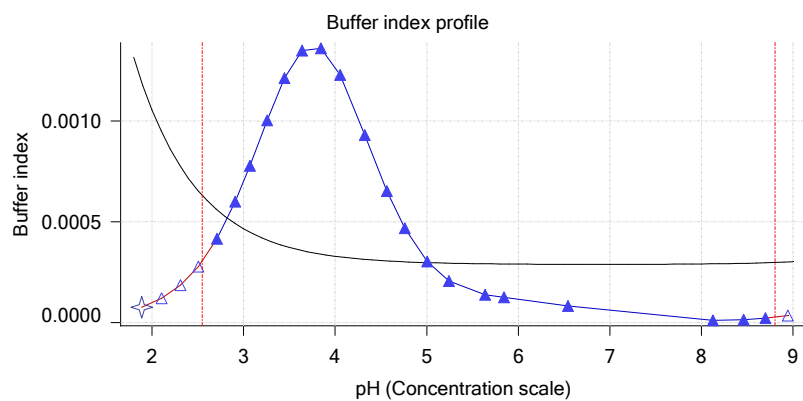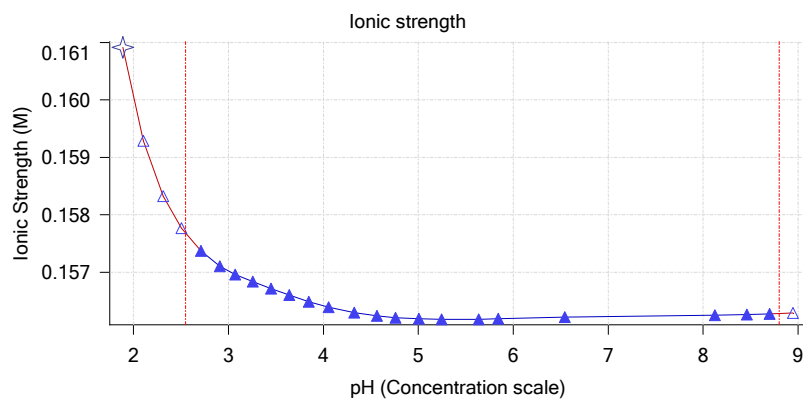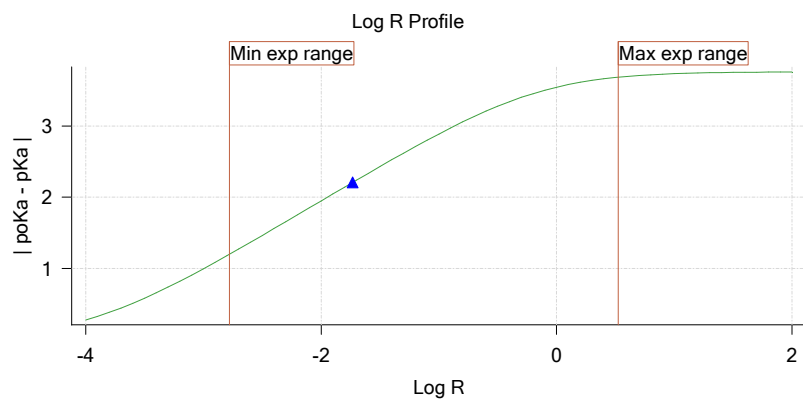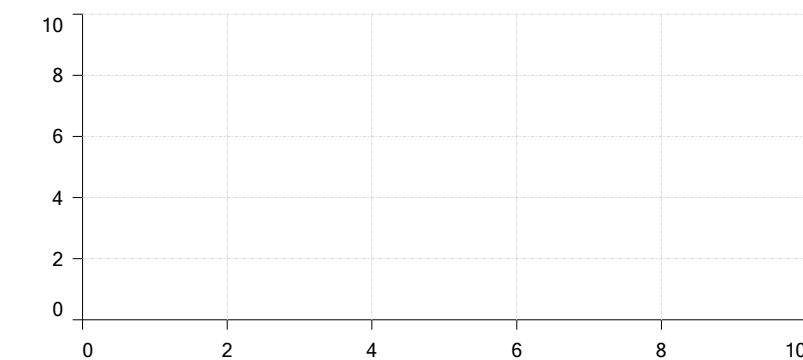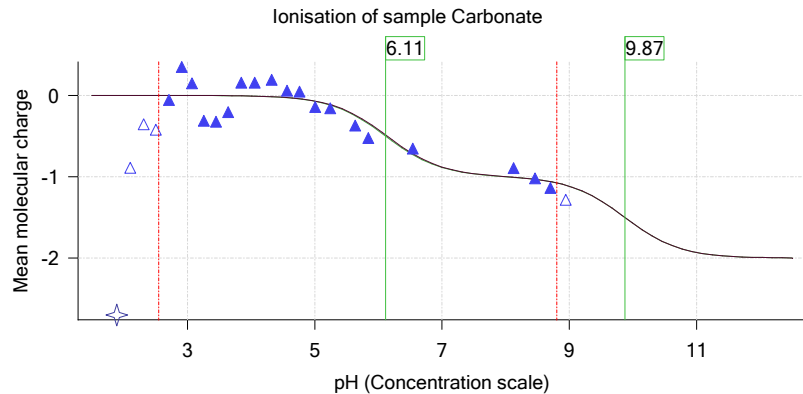

Sample name: **M04\_octanol**  
 Assay name: **pH-metric high logP**  
 Assay ID: **18C-24002**  
 Filename: **C:\Sirius\_T3\Mehtap\20180323\_exp33\_logP\_T3-2\18C-24002\_M04\_octanol\_pH-metric high logP.t3r**

Experiment start time: **3/24/2018 1:34:06 AM**  
 Analyst: **Dorothy Levorse**  
 Instrument ID: **T312060**

pH-metric high logP Titration 2 of 3 18C-24002 Points 25 to 51

## Overall results

RMSD 0.334  
 Average ionic strength 0.162 M  
 Average temperature 25.0°C  
 Partition ratio 0.0644 : 1  
 Analyte concentration range 2267.2 µM to 2336.0 µM  
 Total points considered 24 of 27

## Warnings and errors

Errors None  
 Warnings None

## Four-Plus parameters

Alpha 0.119 3/24/2018 1:34:06 AM C:\Sirius\_T3\HCl18C23.t3r  
 S 0.9972 3/24/2018 1:34:06 AM C:\Sirius\_T3\HCl18C23.t3r  
 jH 0.9 3/24/2018 1:34:06 AM C:\Sirius\_T3\HCl18C23.t3r  
 jOH -0.3 3/24/2018 1:34:06 AM C:\Sirius\_T3\HCl18C23.t3r

## Titrants

0.50 M HCl 0.997124 3/24/2018 1:34:06 AM C:\Sirius\_T3\HCl18C23.t3r  
 0.50 M KOH 1.003190 3/24/2018 1:34:06 AM C:\Sirius\_T3\KOH18C23.t3r

## Sample

M04\_octanol concentration factor 0.920  
 Base pKa 1 5.97  
 logP (XH +) 0.19  
 logP (neutral X) 4.01

## Sample graphs

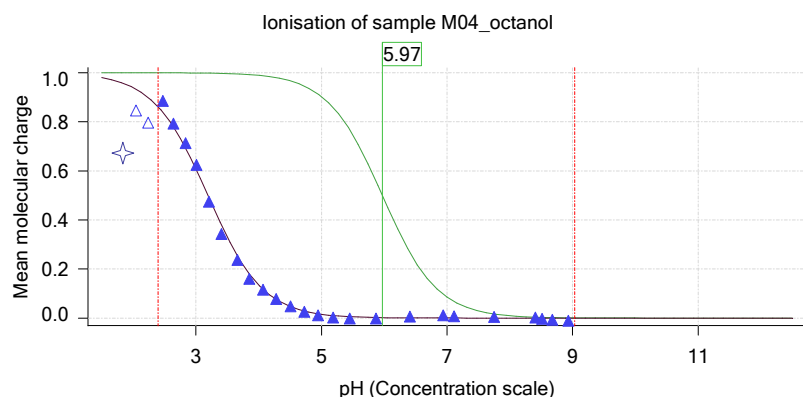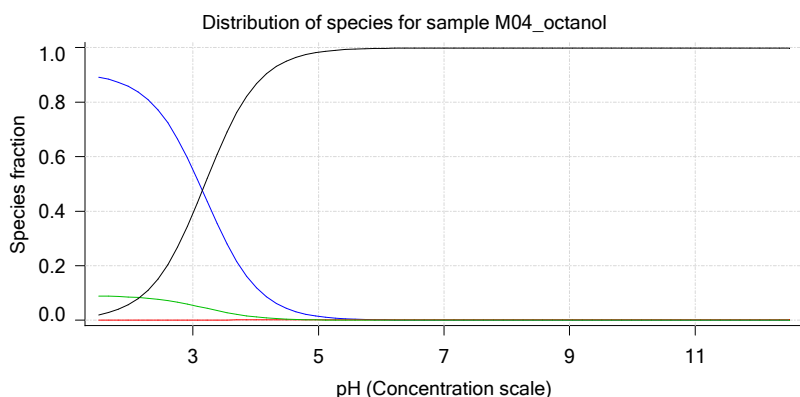

Sample name: **M04\_octanol**  
 Assay name: **pH-metric high logP**  
 Assay ID: **18C-24002**  
 Filename: **C:\Sirius\_T3\Mehtap\20180323\_exp33\_logP\_T3-2\18C-24002\_M04\_octanol\_pH-metric high logP.t3r**

Experiment start time: **3/24/2018 1:34:06 AM**  
 Analyst: **Dorothy Levorse**  
 Instrument ID: **T312060**

## Sample graphs (continued)

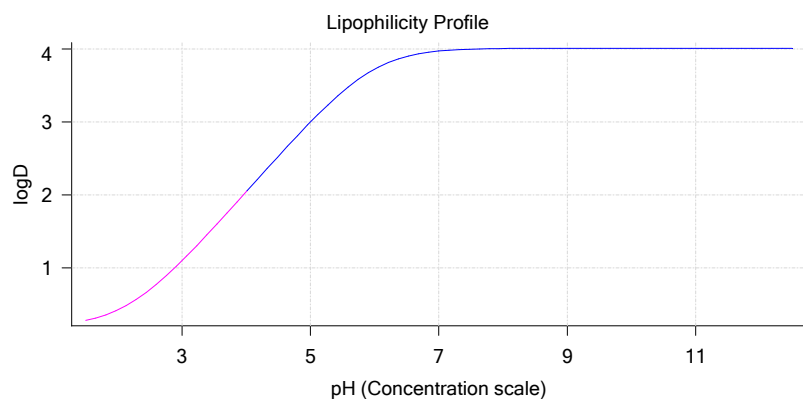

## Sample logD and percent species

| pH     | M04_octanol<br>logD | M04_octanol<br>M04_octanolH | M04_octanol<br>M04_octanol | M04_octanol<br>M04_octanolH* | M04_octanol<br>M04_octanol* | Comment    |
|--------|---------------------|-----------------------------|----------------------------|------------------------------|-----------------------------|------------|
| 1.000  | 0.22                | 90.35 %                     | 0.00 %                     | 9.01 %                       | 0.64 %                      | Stomach pH |
| 1.200  | 0.24                | 90.02 %                     | 0.00 %                     | 8.97 %                       | 1.01 %                      |            |
| 2.000  | 0.42                | 85.44 %                     | 0.01 %                     | 8.52 %                       | 6.03 %                      |            |
| 3.000  | 1.10                | 55.36 %                     | 0.06 %                     | 5.52 %                       | 39.07 %                     |            |
| 4.000  | 2.04                | 12.24 %                     | 0.13 %                     | 1.22 %                       | 86.40 %                     |            |
| 5.000  | 3.00                | 1.39 %                      | 0.15 %                     | 0.14 %                       | 98.32 %                     | Blood pH   |
| 6.000  | 3.72                | 0.14 %                      | 0.15 %                     | 0.01 %                       | 99.69 %                     |            |
| 6.500  | 3.90                | 0.04 %                      | 0.15 %                     | 0.00 %                       | 99.80 %                     |            |
| 7.000  | 3.97                | 0.01 %                      | 0.15 %                     | 0.00 %                       | 99.83 %                     |            |
| 7.400  | 3.99                | 0.01 %                      | 0.15 %                     | 0.00 %                       | 99.84 %                     |            |
| 8.000  | 4.01                | 0.00 %                      | 0.15 %                     | 0.00 %                       | 99.85 %                     |            |
| 9.000  | 4.01                | 0.00 %                      | 0.15 %                     | 0.00 %                       | 99.85 %                     |            |
| 10.000 | 4.01                | 0.00 %                      | 0.15 %                     | 0.00 %                       | 99.85 %                     |            |
| 11.000 | 4.01                | 0.00 %                      | 0.15 %                     | 0.00 %                       | 99.85 %                     |            |
| 12.000 | 4.01                | 0.00 %                      | 0.15 %                     | 0.00 %                       | 99.85 %                     |            |

## Carbonate and acidity

 Carbonate 0.106 mM  
 Acidity error -0.298 mM

## Other graphs

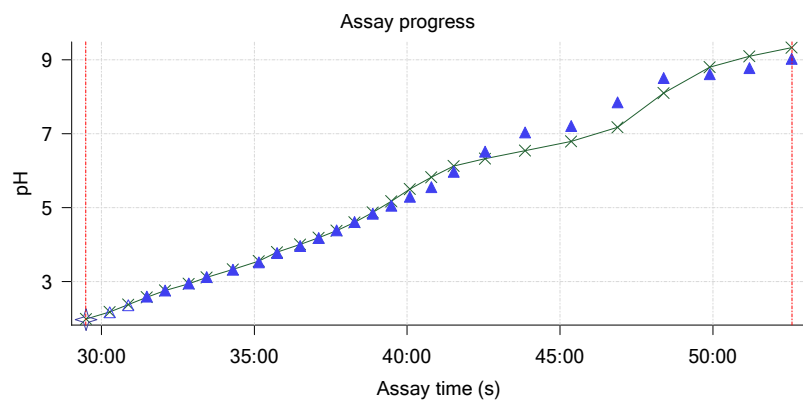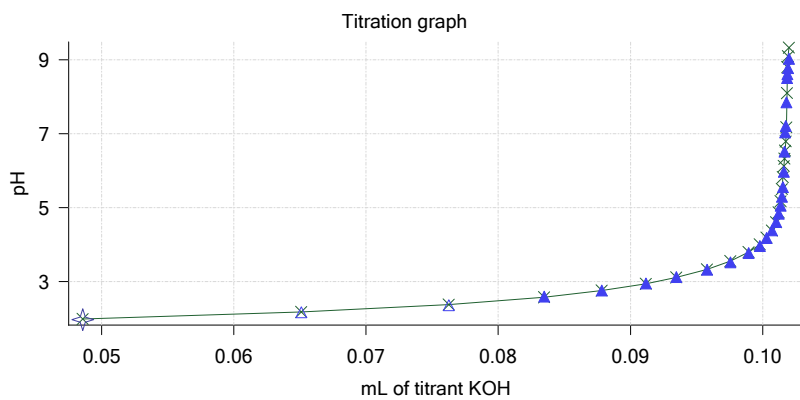



Sample name: **M04\_octanol**  
 Assay name: **pH-metric high logP**  
 Assay ID: **18C-24002**  
 Filename: **C:\Sirius\_T3\Mehtap\20180323\_exp33\_logP\_T3-2\18C-24002\_M04\_octanol\_pH-metric high logP.t3r**

Experiment start time: **3/24/2018 1:34:06 AM**  
 Analyst: **Dorothy Levorse**  
 Instrument ID: **T312060**

## Other graphs (continued)

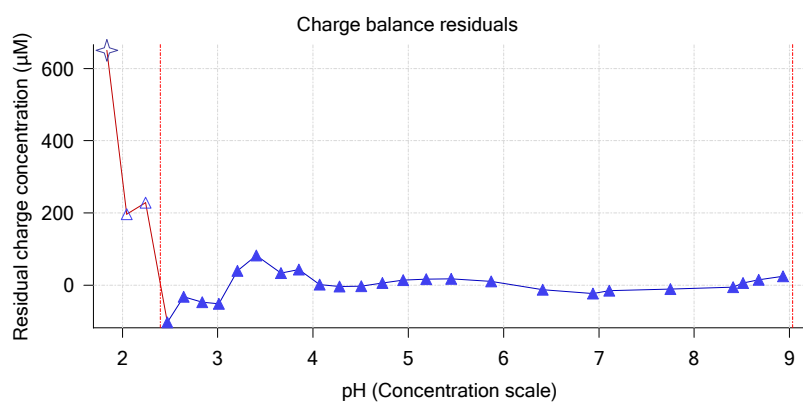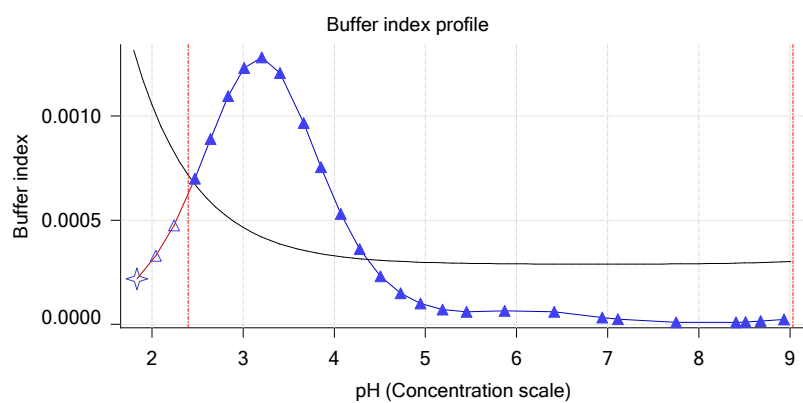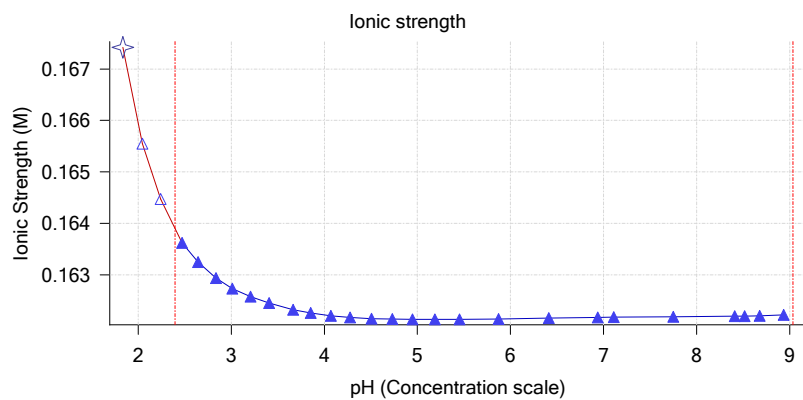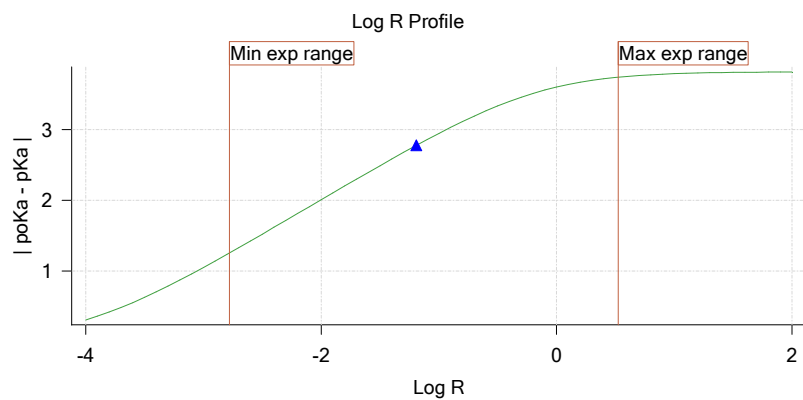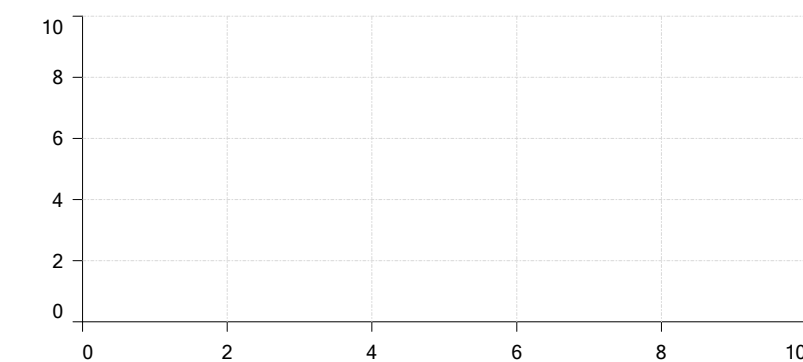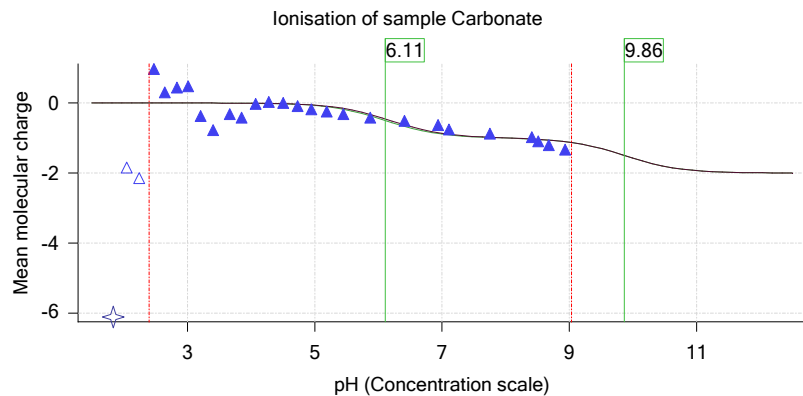

Sample name: **M04\_octanol**  
 Assay name: **pH-metric high logP**  
 Assay ID: **18C-24002**  
 Filename: **C:\Sirius\_T3\Mehtap\20180323\_exp33\_logP\_T3-2\18C-24002\_M04\_octanol\_pH-metric high logP.t3r**

Experiment start time: **3/24/2018 1:34:06 AM**  
 Analyst: **Dorothy Levorse**  
 Instrument ID: **T312060**

pH-metric high logP Titration 3 of 3 18C-24002 Points 52 to 75

## Overall results

RMSD 0.452  
 Average ionic strength 0.168 M  
 Average temperature 25.0°C  
 Partition ratio 0.2805 : 1  
 Analyte concentration range 1766.3 µM to 1811.0 µM  
 Total points considered 19 of 24

## Warnings and errors

Errors None  
 Warnings None

## Four-Plus parameters

|                                                                                |       |        |                      |                           |
|--------------------------------------------------------------------------------|-------|--------|----------------------|---------------------------|
|  | Alpha | 0.119  | 3/24/2018 1:34:06 AM | C:\Sirius_T3\HCl18C23.t3r |
|  | S     | 0.9972 | 3/24/2018 1:34:06 AM | C:\Sirius_T3\HCl18C23.t3r |
|  | jH    | 0.9    | 3/24/2018 1:34:06 AM | C:\Sirius_T3\HCl18C23.t3r |
|  | jOH   | -0.3   | 3/24/2018 1:34:06 AM | C:\Sirius_T3\HCl18C23.t3r |

## Titrants

|                                                                                 |            |          |                      |                           |
|---------------------------------------------------------------------------------|------------|----------|----------------------|---------------------------|
|   | 0.50 M HCl | 0.997124 | 3/24/2018 1:34:06 AM | C:\Sirius_T3\HCl18C23.t3r |
|  | 0.50 M KOH | 1.003190 | 3/24/2018 1:34:06 AM | C:\Sirius_T3\KOH18C23.t3r |

## Sample

|                                                                                  |                                  |       |
|----------------------------------------------------------------------------------|----------------------------------|-------|
|  | M04_octanol concentration factor | 0.952 |
|  | Base pKa 1                       | 5.97  |
|  | logP (XH +)                      | 0.19  |
|  | logP (neutral X)                 | 3.70  |

## Sample graphs

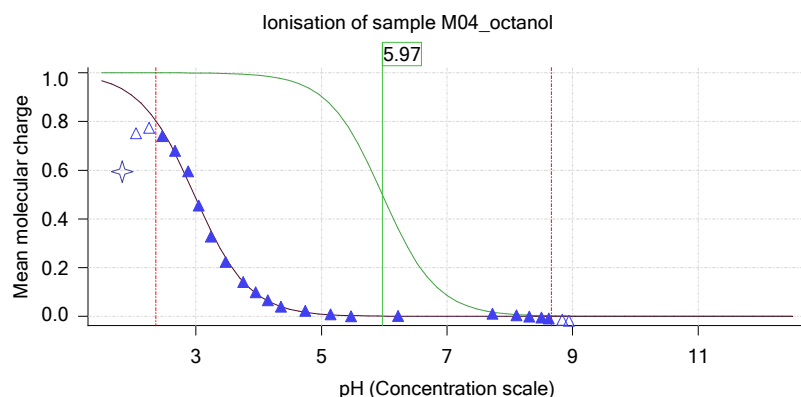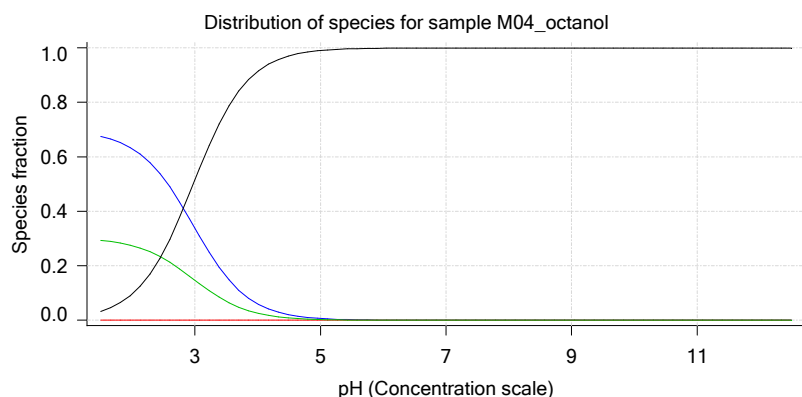

Sample name: **M04\_octanol**  
 Assay name: **pH-metric high logP**  
 Assay ID: **18C-24002**  
 Filename: **C:\Sirius\_T3\Mehtap\20180323\_exp33\_logP\_T3-2\18C-24002\_M04\_octanol\_pH-metric high logP.t3r**

Experiment start time: **3/24/2018 1:34:06 AM**  
 Analyst: **Dorothy Levorse**  
 Instrument ID: **T312060**

## Sample graphs (continued)

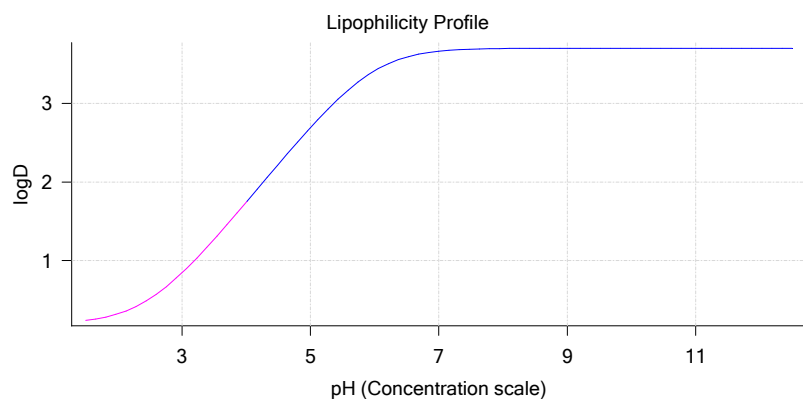

## Sample logD and percent species

| pH     | M04_octanol<br>logD | M04_octanol<br>M04_octanolH | M04_octanol<br>M04_octanolH | M04_octanol<br>M04_octanolH* | M04_octanol<br>M04_octanol* | Comment |
|--------|---------------------|-----------------------------|-----------------------------|------------------------------|-----------------------------|---------|
| 1.000  | 0.20                | 68.98 %                     | 0.00 %                      | 29.97 %                      | 1.05 %                      |         |
| 1.200  | 0.21                | 68.56 %                     | 0.00 %                      | 29.78 %                      | 1.65 %                      |         |
| 2.000  | 0.32                | 63.02 %                     | 0.01 %                      | 27.38 %                      | 9.60 %                      |         |
| 3.000  | 0.84                | 33.81 %                     | 0.04 %                      | 14.69 %                      | 51.47 %                     |         |
| 4.000  | 1.74                | 6.00 %                      | 0.06 %                      | 2.61 %                       | 91.33 %                     |         |
| 5.000  | 2.69                | 0.65 %                      | 0.07 %                      | 0.28 %                       | 99.00 %                     |         |
| 6.000  | 3.42                | 0.07 %                      | 0.07 %                      | 0.03 %                       | 99.84 %                     |         |
| 6.500  | 3.59                | 0.02 %                      | 0.07 %                      | 0.01 %                       | 99.90 %                     |         |
| 7.000  | 3.67                | 0.01 %                      | 0.07 %                      | 0.00 %                       | 99.92 %                     |         |
| 7.400  | 3.69                | 0.00 %                      | 0.07 %                      | 0.00 %                       | 99.93 %                     |         |
| 8.000  | 3.70                | 0.00 %                      | 0.07 %                      | 0.00 %                       | 99.93 %                     |         |
| 9.000  | 3.70                | 0.00 %                      | 0.07 %                      | 0.00 %                       | 99.93 %                     |         |
| 10.000 | 3.70                | 0.00 %                      | 0.07 %                      | 0.00 %                       | 99.93 %                     |         |
| 11.000 | 3.70                | 0.00 %                      | 0.07 %                      | 0.00 %                       | 99.93 %                     |         |
| 12.000 | 3.70                | 0.00 %                      | 0.07 %                      | 0.00 %                       | 99.93 %                     |         |

## Carbonate and acidity

 Carbonate 0.104 mM  
 Acidity error -0.102 mM

## Other graphs

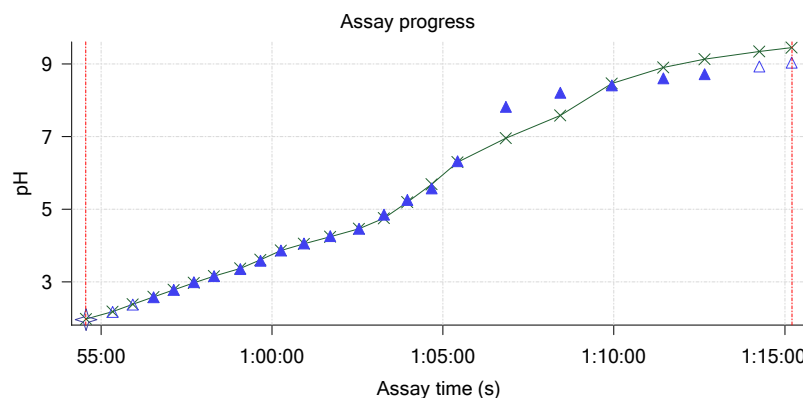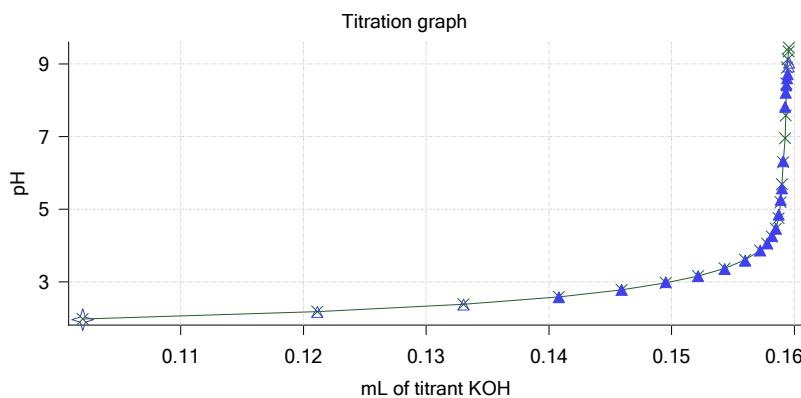

Sample name: **M04\_octanol**  
 Assay name: **pH-metric high logP**  
 Assay ID: **18C-24002**  
 Filename: **C:\Sirius\_T3\Mehtap\20180323\_exp33\_logP\_T3-2\18C-24002\_M04\_octanol\_pH-metric high logP.t3r**

Experiment start time: **3/24/2018 1:34:06 AM**  
 Analyst: **Dorothy Levorse**  
 Instrument ID: **T312060**

## Other graphs (continued)

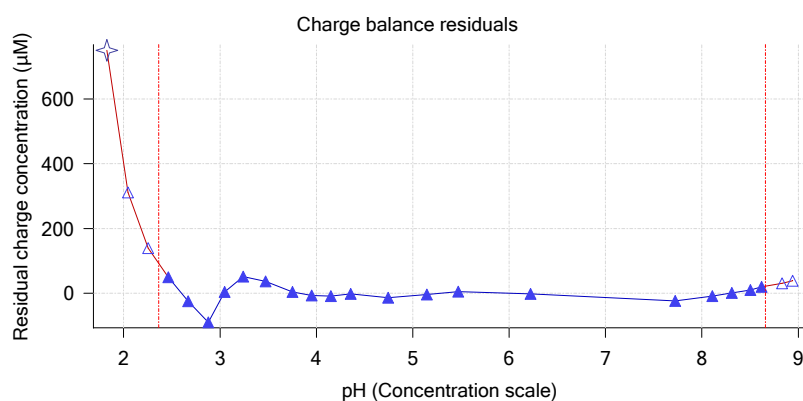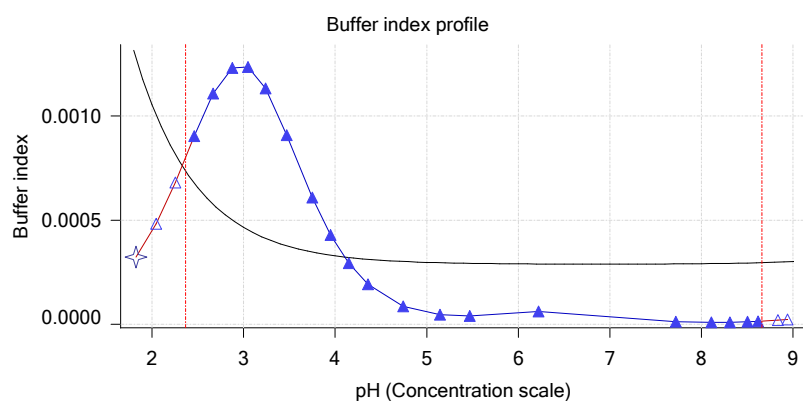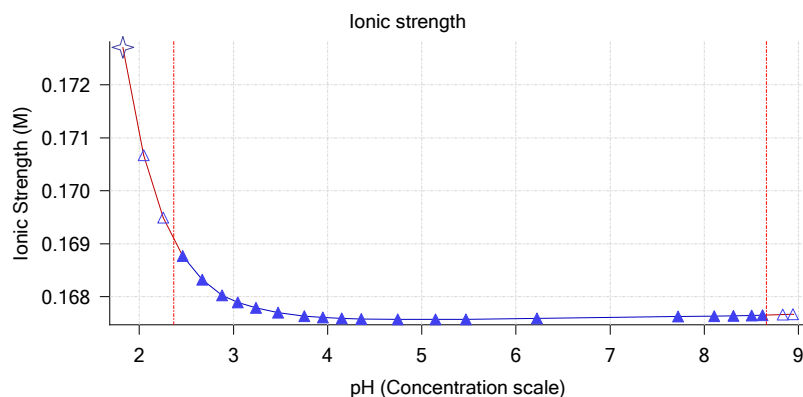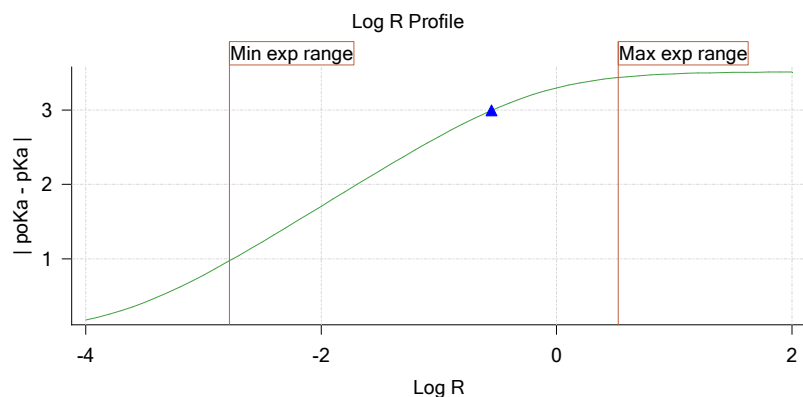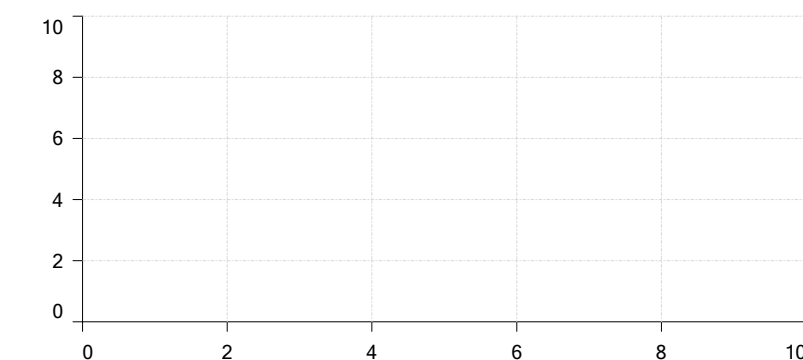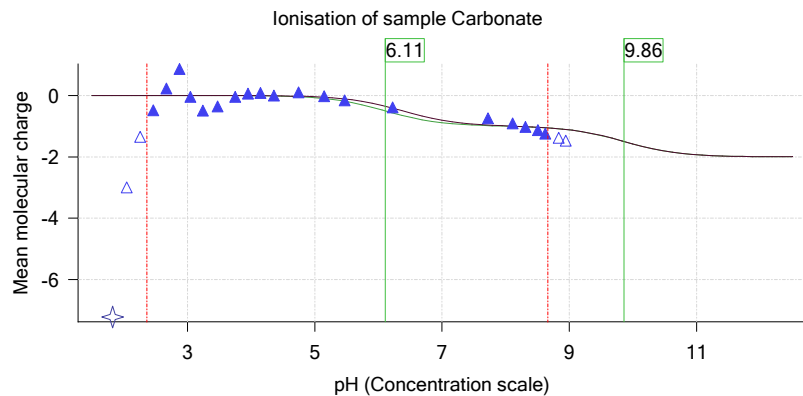

Sample name: **M04\_octanol**  
 Assay name: **pH-metric high logP**  
 Assay ID: **18C-24002**  
 Filename: **C:\Sirius\_T3\Mehtap\20180323\_exp33\_logP\_T3-2\18C-24002\_M04\_octanol\_pH-metric high logP.t3r**

Experiment start time: **3/24/2018 1:34:06 AM**  
 Analyst: **Dorothy Levorse**  
 Instrument ID: **T312060**

## Assay Model

| Settings                          | Value        | Date/Time changed    | Imported from      |
|-----------------------------------|--------------|----------------------|--------------------|
| Sample name                       | M04_octanol  | 3/9/2018 4:34:21 PM  | User entered value |
| Sample by                         | Weight       |                      | Default value      |
| Sample weight                     | 0.001110 g   | 3/23/2018 5:00:32 PM | User entered value |
| Formula weight                    | 269.73 g/mol | 3/9/2018 4:34:21 PM  | User entered value |
| Solubility                        | Unknown      |                      | Default value      |
| Molecular weight                  | 269.73       | 3/9/2018 4:34:21 PM  | User entered value |
| Individual pKa ionic environments | No           |                      | Default value      |
| Number of pKas                    | 1            | 3/9/2018 4:34:21 PM  | User entered value |
| Sample is a                       | Base         | 3/9/2018 4:34:21 PM  | User entered value |
| pKa 1                             | 5.97         | 3/9/2018 4:34:21 PM  | User entered value |
| logp (XH +)                       | 0.19         | 3/9/2018 4:34:33 PM  | User entered value |
| logP (neutral X)                  | 3.50         | 3/23/2018 2:32:46 PM | User entered value |

## Events

| Time    | Event             | Water      | Acid       | Base       | Octanol    | pH    | dpH/dt   | pH R-squared | pH SD   | dpH/dt time         |
|---------|-------------------|------------|------------|------------|------------|-------|----------|--------------|---------|---------------------|
| 5:00.2  | Initial pH = 9.63 |            |            |            |            |       |          |              |         |                     |
| 7:59.7  | Data point 1      | 1.50000 mL | 0.04892 mL | 0.00183 mL | 0.03001 mL | 2.014 | -0.00160 | 0.32049      | 0.00014 | 10.5 s              |
| 8:46.4  | Data point 2      | 1.50000 mL | 0.04892 mL | 0.01635 mL | 0.03001 mL | 2.224 | -0.00074 | 0.14269      | 0.00010 | 10.0 s              |
| 9:21.9  | Data point 3      | 1.50000 mL | 0.04892 mL | 0.02545 mL | 0.03001 mL | 2.429 | 0.00290  | 0.05785      | 0.00060 | 10.0 s              |
| 9:57.5  | Data point 4      | 1.50000 mL | 0.04892 mL | 0.03109 mL | 0.03001 mL | 2.620 | -0.00606 | 0.72611      | 0.00035 | 10.0 s              |
| 10:33.1 | Data point 5      | 1.50000 mL | 0.04892 mL | 0.03478 mL | 0.03001 mL | 2.822 | -0.00318 | 0.34754      | 0.00027 | 10.0 s              |
| 11:08.6 | Data point 6      | 1.50000 mL | 0.04892 mL | 0.03718 mL | 0.03001 mL | 3.022 | -0.00788 | 0.20158      | 0.00087 | 10.0 s              |
| 11:44.0 | Data point 7      | 1.50000 mL | 0.04892 mL | 0.03883 mL | 0.03001 mL | 3.182 | -0.00246 | 0.53024      | 0.00017 | 10.0 s              |
| 12:34.9 | Data point 8      | 1.50000 mL | 0.04892 mL | 0.04052 mL | 0.03001 mL | 3.368 | -0.01119 | 0.56806      | 0.00073 | 10.0 s              |
| 13:25.9 | Data point 9      | 1.50000 mL | 0.04892 mL | 0.04182 mL | 0.03001 mL | 3.557 | -0.00577 | 0.09662      | 0.00092 | 10.0 s              |
| 14:11.6 | Data point 10     | 1.50000 mL | 0.04892 mL | 0.04294 mL | 0.03001 mL | 3.749 | -0.00944 | 0.26941      | 0.00090 | 10.0 s              |
| 14:47.0 | Data point 11     | 1.50000 mL | 0.04892 mL | 0.04393 mL | 0.03001 mL | 3.955 | -0.00902 | 0.80462      | 0.00050 | 10.0 s              |
| 15:22.5 | Data point 12     | 1.50000 mL | 0.04892 mL | 0.04497 mL | 0.03001 mL | 4.163 | -0.00871 | 0.81314      | 0.00048 | 10.5 s              |
| 15:58.4 | Data point 13     | 1.50000 mL | 0.04892 mL | 0.04600 mL | 0.03001 mL | 4.430 | -0.01386 | 0.79748      | 0.00077 | 11.0 s              |
| 16:45.2 | Data point 14     | 1.50000 mL | 0.04892 mL | 0.04673 mL | 0.03001 mL | 4.671 | -0.00488 | 0.10408      | 0.00075 | 11.5 s              |
| 17:22.1 | Data point 15     | 1.50000 mL | 0.04892 mL | 0.04711 mL | 0.03001 mL | 4.865 | -0.01667 | 0.86899      | 0.00088 | 14.5 s              |
| 18:12.3 | Data point 16     | 1.50000 mL | 0.04892 mL | 0.04751 mL | 0.03001 mL | 5.110 | -0.01586 | 0.79314      | 0.00088 | 16.0 s              |
| 18:53.6 | Data point 17     | 1.50000 mL | 0.04892 mL | 0.04770 mL | 0.03001 mL | 5.348 | -0.01986 | 0.98346      | 0.00099 | 20.5 s              |
| 19:44.8 | Data point 18     | 1.50000 mL | 0.04892 mL | 0.04795 mL | 0.03001 mL | 5.739 | -0.01915 | 0.96564      | 0.00096 | 26.5 s              |
| 20:36.6 | Data point 19     | 1.50000 mL | 0.04892 mL | 0.04807 mL | 0.03001 mL | 5.946 | -0.01903 | 0.92495      | 0.00098 | 30.5 s              |
| 21:37.5 | Data point 20     | 1.50000 mL | 0.04892 mL | 0.04819 mL | 0.03001 mL | 6.643 | -0.02497 | 0.94842      | 0.00127 | Timed out at 59.5 s |
| 23:08.1 | Data point 21     | 1.50000 mL | 0.04892 mL | 0.04833 mL | 0.03001 mL | 8.221 | -0.07094 | 0.99161      | 0.00352 | Timed out at 59.5 s |
| 24:43.7 | Data point 22     | 1.50000 mL | 0.04892 mL | 0.04840 mL | 0.03001 mL | 8.555 | -0.03178 | 0.97425      | 0.00159 | Timed out at 59.5 s |
| 26:19.4 | Data point 23     | 1.50000 mL | 0.04892 mL | 0.04847 mL | 0.03001 mL | 8.794 | -0.01850 | 0.95661      | 0.00093 | 58.5 s              |
| 27:48.5 | Data point 24     | 1.50000 mL | 0.04892 mL | 0.04857 mL | 0.03001 mL | 9.039 | -0.01975 | 0.95215      | 0.00100 | 41.5 s              |
| 29:30.0 | Data point 25     | 1.50000 mL | 0.10310 mL | 0.04857 mL | 0.11002 mL | 1.964 | -0.00880 | 0.24648      | 0.00088 | 10.0 s              |
| 30:16.3 | Data point 26     | 1.50000 mL | 0.10310 mL | 0.06510 mL | 0.11002 mL | 2.166 | -0.01564 | 0.64906      | 0.00096 | 11.0 s              |
| 30:53.0 | Data point 27     | 1.50000 mL | 0.10310 mL | 0.07627 mL | 0.11002 mL | 2.359 | -0.00237 | 0.24657      | 0.00024 | 10.5 s              |
| 31:29.0 | Data point 28     | 1.50000 mL | 0.10310 mL | 0.08347 mL | 0.11002 mL | 2.587 | 0.00566  | 0.08086      | 0.00098 | 10.5 s              |
| 32:05.1 | Data point 29     | 1.50000 mL | 0.10310 mL | 0.08784 mL | 0.11002 mL | 2.757 | -0.00202 | 0.33078      | 0.00017 | 10.5 s              |
| 32:51.5 | Data point 30     | 1.50000 mL | 0.10310 mL | 0.09118 mL | 0.11002 mL | 2.950 | -0.00478 | 0.66757      | 0.00029 | 10.0 s              |
| 33:26.8 | Data point 31     | 1.50000 mL | 0.10310 mL | 0.09346 mL | 0.11002 mL | 3.123 | -0.00470 | 0.90243      | 0.00024 | 10.0 s              |
| 34:17.8 | Data point 32     | 1.50000 mL | 0.10310 mL | 0.09579 mL | 0.11002 mL | 3.317 | -0.00344 | 0.59909      | 0.00022 | 10.5 s              |
| 35:09.2 | Data point 33     | 1.50000 mL | 0.10310 mL | 0.09755 mL | 0.11002 mL | 3.515 | -0.00933 | 0.53854      | 0.00063 | 10.0 s              |
| 35:44.5 | Data point 34     | 1.50000 mL | 0.10310 mL | 0.09894 mL | 0.11002 mL | 3.772 | -0.00653 | 0.77129      | 0.00037 | 10.0 s              |
| 36:30.2 | Data point 35     | 1.50000 mL | 0.10310 mL | 0.09979 mL | 0.11002 mL | 3.961 | -0.00468 | 0.84923      | 0.00025 | 10.5 s              |
| 37:06.1 | Data point 36     | 1.50000 mL | 0.10310 mL | 0.10031 mL | 0.11002 mL | 4.178 | -0.00915 | 0.61492      | 0.00058 | 10.0 s              |
| 37:41.5 | Data point 37     | 1.50000 mL | 0.10310 mL | 0.10071 mL | 0.11002 mL | 4.385 | -0.00988 | 0.57323      | 0.00064 | 10.0 s              |



## Assay Events

Sample name: **M04\_octanol**  
Assay name: **pH-metric high logP**  
Assay ID: **18C-24002**  
Filename: **C:\Sirius\_T3\Mehtap\20180323\_exp33\_logP\_T3-2\18C-24002\_M04\_octanol\_pH-metric high logP.t3r**

Experiment start time: **3/24/2018 1:34:06 AM**  
Analyst: **Dorothy Levorse**  
Instrument ID: **T312060**

## Events (continued)

| Time      | Event         | Water      | Acid       | Base       | Octanol    | pH    | dpH/dt   | pH R-squared | pH SD   | dpH/dt time         |
|-----------|---------------|------------|------------|------------|------------|-------|----------|--------------|---------|---------------------|
| 38:16.9   | Data point 38 | 1.50000 mL | 0.10310 mL | 0.10101 mL | 0.11002 mL | 4.612 | -0.00861 | 0.68608      | 0.00051 | 10.5 s              |
| 38:52.8   | Data point 39 | 1.50000 mL | 0.10310 mL | 0.10122 mL | 0.11002 mL | 4.835 | -0.01226 | 0.66939      | 0.00074 | 10.5 s              |
| 39:28.7   | Data point 40 | 1.50000 mL | 0.10310 mL | 0.10136 mL | 0.11002 mL | 5.051 | -0.01367 | 0.71800      | 0.00080 | 11.0 s              |
| 40:05.1   | Data point 41 | 1.50000 mL | 0.10310 mL | 0.10146 mL | 0.11002 mL | 5.292 | -0.01155 | 0.59589      | 0.00074 | 12.0 s              |
| 40:47.6   | Data point 42 | 1.50000 mL | 0.10310 mL | 0.10153 mL | 0.11002 mL | 5.555 | -0.01710 | 0.84028      | 0.00092 | 13.5 s              |
| 41:31.6   | Data point 43 | 1.50000 mL | 0.10310 mL | 0.10160 mL | 0.11002 mL | 5.972 | -0.01840 | 0.92739      | 0.00094 | 31.0 s              |
| 42:33.2   | Data point 44 | 1.50000 mL | 0.10310 mL | 0.10165 mL | 0.11002 mL | 6.512 | -0.01880 | 0.91936      | 0.00097 | 53.0 s              |
| 43:51.7   | Data point 45 | 1.50000 mL | 0.10310 mL | 0.10169 mL | 0.11002 mL | 7.037 | -0.04193 | 0.98601      | 0.00209 | Timed out at 59.5 s |
| 45:22.1   | Data point 46 | 1.50000 mL | 0.10310 mL | 0.10174 mL | 0.11002 mL | 7.209 | -0.04636 | 0.98987      | 0.00230 | Timed out at 59.5 s |
| 46:52.7   | Data point 47 | 1.50000 mL | 0.10310 mL | 0.10179 mL | 0.11002 mL | 7.847 | -0.06759 | 0.99607      | 0.00335 | Timed out at 59.5 s |
| 48:23.2   | Data point 48 | 1.50000 mL | 0.10310 mL | 0.10183 mL | 0.11002 mL | 8.503 | -0.03401 | 0.99546      | 0.00168 | Timed out at 59.5 s |
| 49:53.7   | Data point 49 | 1.50000 mL | 0.10310 mL | 0.10188 mL | 0.11002 mL | 8.608 | -0.01529 | 0.60040      | 0.00097 | 47.5 s              |
| 51:11.7   | Data point 50 | 1.50000 mL | 0.10310 mL | 0.10193 mL | 0.11002 mL | 8.772 | -0.01850 | 0.93390      | 0.00095 | 52.0 s              |
| 52:34.3   | Data point 51 | 1.50000 mL | 0.10310 mL | 0.10200 mL | 0.11002 mL | 9.026 | -0.01279 | 0.96553      | 0.00064 | 36.5 s              |
| 54:34.0   | Data point 52 | 1.50000 mL | 0.16030 mL | 0.10200 mL | 0.51002 mL | 1.954 | -0.00445 | 0.52317      | 0.00030 | 10.0 s              |
| 55:20.3   | Data point 53 | 1.50000 mL | 0.16030 mL | 0.12112 mL | 0.51002 mL | 2.166 | 0.01490  | 0.84480      | 0.00080 | 10.0 s              |
| 55:56.0   | Data point 54 | 1.50000 mL | 0.16030 mL | 0.13304 mL | 0.51002 mL | 2.372 | 0.00293  | 0.49233      | 0.00021 | 10.5 s              |
| 56:32.0   | Data point 55 | 1.50000 mL | 0.16030 mL | 0.14080 mL | 0.51002 mL | 2.578 | 0.01404  | 0.59238      | 0.00090 | 10.0 s              |
| 57:07.6   | Data point 56 | 1.50000 mL | 0.16030 mL | 0.14593 mL | 0.51002 mL | 2.782 | -0.00325 | 0.08785      | 0.00054 | 10.0 s              |
| 57:43.1   | Data point 57 | 1.50000 mL | 0.16030 mL | 0.14953 mL | 0.51002 mL | 2.990 | -0.00261 | 0.10471      | 0.00040 | 10.0 s              |
| 58:18.5   | Data point 58 | 1.50000 mL | 0.16030 mL | 0.15216 mL | 0.51002 mL | 3.158 | -0.00222 | 0.09026      | 0.00037 | 10.0 s              |
| 59:04.3   | Data point 59 | 1.50000 mL | 0.16030 mL | 0.15433 mL | 0.51002 mL | 3.351 | -0.00880 | 0.28962      | 0.00081 | 10.0 s              |
| 59:39.8   | Data point 60 | 1.50000 mL | 0.16030 mL | 0.15600 mL | 0.51002 mL | 3.582 | -0.01386 | 0.91128      | 0.00072 | 10.5 s              |
| 1:00:15.8 | Data point 61 | 1.50000 mL | 0.16030 mL | 0.15722 mL | 0.51002 mL | 3.861 | -0.01252 | 0.59534      | 0.00080 | 10.0 s              |
| 1:00:56.3 | Data point 62 | 1.50000 mL | 0.16030 mL | 0.15779 mL | 0.51002 mL | 4.058 | -0.00480 | 0.17045      | 0.00057 | 10.0 s              |
| 1:01:42.1 | Data point 63 | 1.50000 mL | 0.16030 mL | 0.15818 mL | 0.51002 mL | 4.256 | -0.00431 | 0.26492      | 0.00041 | 10.0 s              |
| 1:02:32.9 | Data point 64 | 1.50000 mL | 0.16030 mL | 0.15849 mL | 0.51002 mL | 4.464 | 0.00183  | 0.00838      | 0.00099 | 18.5 s              |
| 1:03:16.7 | Data point 65 | 1.50000 mL | 0.16030 mL | 0.15873 mL | 0.51002 mL | 4.850 | -0.01054 | 0.48317      | 0.00075 | 10.5 s              |
| 1:03:57.8 | Data point 66 | 1.50000 mL | 0.16030 mL | 0.15889 mL | 0.51002 mL | 5.251 | -0.01079 | 0.55670      | 0.00071 | 12.0 s              |
| 1:04:40.3 | Data point 67 | 1.50000 mL | 0.16030 mL | 0.15898 mL | 0.51002 mL | 5.574 | -0.01750 | 0.78457      | 0.00098 | 15.0 s              |
| 1:05:25.7 | Data point 68 | 1.50000 mL | 0.16030 mL | 0.15910 mL | 0.51002 mL | 6.324 | -0.01848 | 0.97545      | 0.00092 | 54.0 s              |
| 1:06:50.3 | Data point 69 | 1.50000 mL | 0.16030 mL | 0.15924 mL | 0.51002 mL | 7.819 | -0.10642 | 0.99284      | 0.00528 | Timed out at 59.5 s |
| 1:08:25.9 | Data point 70 | 1.50000 mL | 0.16030 mL | 0.15931 mL | 0.51002 mL | 8.203 | -0.07202 | 0.98050      | 0.00359 | Timed out at 59.5 s |
| 1:09:56.4 | Data point 71 | 1.50000 mL | 0.16030 mL | 0.15936 mL | 0.51002 mL | 8.406 | -0.04547 | 0.97923      | 0.00227 | Timed out at 59.5 s |
| 1:11:26.8 | Data point 72 | 1.50000 mL | 0.16030 mL | 0.15941 mL | 0.51002 mL | 8.600 | -0.01814 | 0.81212      | 0.00099 | 42.0 s              |
| 1:12:39.4 | Data point 73 | 1.50000 mL | 0.16030 mL | 0.15945 mL | 0.51002 mL | 8.714 | -0.02169 | 0.85709      | 0.00116 | Timed out at 59.5 s |
| 1:14:15.1 | Data point 74 | 1.50000 mL | 0.16030 mL | 0.15953 mL | 0.51002 mL | 8.928 | -0.01718 | 0.73352      | 0.00099 | 26.0 s              |
| 1:15:11.8 | Data point 75 | 1.50000 mL | 0.16030 mL | 0.15957 mL | 0.51002 mL | 9.035 | -0.01441 | 0.58124      | 0.00093 | 19.5 s              |
| 1:15:40.3 | Assay volumes | 1.50000 mL | 0.16030 mL | 0.15957 mL | 0.51002 mL |       |          |              |         |                     |

Sample name: **M04\_octanol**  
 Assay name: **pH-metric high logP**  
 Assay ID: **18C-24002**  
 Filename: **C:\Sirius\_T3\Mehtap\20180323\_exp33\_logP\_T3-2\18C-24002\_M04\_octanol\_pH-metric high logP.t3r**

Experiment start time: **3/24/2018 1:34:06 AM**  
 Analyst: **Dorothy Levorse**  
 Instrument ID: **T312060**

## Assay Settings

| Setting                             | Value              | Original Value | Date/Time changed | Imported from |
|-------------------------------------|--------------------|----------------|-------------------|---------------|
| <b>General Settings</b>             |                    |                |                   |               |
| Analyst name                        | Dorothy Levorse    |                |                   |               |
| <b>Standard Experiment Settings</b> |                    |                |                   |               |
| Number of titrations                | 3                  |                |                   |               |
| Minimum pH                          | 2.000              |                |                   |               |
| Maximum pH                          | 9.000              |                |                   |               |
| pH step between points of           | 0.200              |                |                   |               |
| Minimum titrant addition            | 0.00002 mL         |                |                   |               |
| Maximum titrant addition            | 0.10000 mL         |                |                   |               |
| Argon flow rate                     | 100%               |                |                   |               |
| Start titration using               | Cautious pH adjust |                |                   |               |
| <b>Advanced General Settings</b>    |                    |                |                   |               |
| Detect turbidity using              | None               |                |                   |               |
| Collect turbidity sensor data       | No                 |                |                   |               |
| Collect UV spectra                  | No                 |                |                   |               |
| Stir after titrant addition for     | 5 seconds          |                |                   |               |
| For titrant addition, stir at       | 10%                |                |                   |               |
| <b>Titrant Pre-Dose</b>             |                    |                |                   |               |
| Titrant pre-dose                    | None               |                |                   |               |
| <b>Assay Medium</b>                 |                    |                |                   |               |
| ISA water volume                    | 1.50 mL            |                |                   |               |
| Water added                         | Automatic          |                |                   |               |
| Partition solvent type              | Octanol            |                |                   |               |
| Partition volume                    | 0.030 mL           |                |                   |               |
| Partition solvent added             | Automatic          |                |                   |               |
| After partition addition, stir for  | 1 seconds          |                |                   |               |
| <b>Sample Sonication</b>            |                    |                |                   |               |
| Sonicate                            | Yes                |                |                   |               |
| Adjust pH for sonication            | No                 |                |                   |               |
| Sonicate for                        | 60 seconds         |                |                   |               |
| After sonication stir for           | 5 seconds          |                |                   |               |
| <b>Sample Dissolution</b>           |                    |                |                   |               |
| Perform a dissolution stage         | Yes                |                |                   |               |
| Adjust and hold pH for dissolution  | To start pH        |                |                   |               |
| Stir to dissolve for                | 120 seconds        |                |                   |               |
| For dissolution, stir at            | 10%                |                |                   |               |
| <b>Carbonate purge</b>              |                    |                |                   |               |
| Perform a carbonate purge           | No                 |                |                   |               |
| <b>Temperature Control</b>          |                    |                |                   |               |
| Wait for temperature                | Yes                |                |                   |               |
| Required start temperature          | 25.0°C             |                |                   |               |
| Acceptable deviation                | 0.5°C              |                |                   |               |
| Time to wait                        | 60 seconds         |                |                   |               |
| Stir speed of                       | 50%                |                |                   |               |
| <b>Titration 1</b>                  |                    |                |                   |               |
| Titrate from                        | Low to high pH     |                |                   |               |
| Adjust to start pH                  | Yes                |                |                   |               |
| After pH adjust stir for            | 30 seconds         |                |                   |               |
| Stir to allow partitioning for      | 15 seconds         |                |                   |               |
| Stirrer speed for partitioning      | 50%                |                |                   |               |
| <b>Titration 2</b>                  |                    |                |                   |               |
| Titrate from                        | Low to high pH     |                |                   |               |
| Add additional water                | 0.00 mL            |                |                   |               |
| Additional partition solvent volume | 0.080 mL           |                |                   |               |
| Additional partition solvent added  | Automatic          |                |                   |               |
| After pH adjust stir for            | 30 seconds         |                |                   |               |
| Stir to allow partitioning for      | 15 seconds         |                |                   |               |
| Stirrer speed for partitioning      | 55%                |                |                   |               |



Sample name: **M04\_octanol**  
 Assay name: **pH-metric high logP**  
 Assay ID: **18C-24002**  
 Filename: **C:\Sirius\_T3\Mehtap\20180323\_exp33\_logP\_T3-2\18C-24002\_M04\_octanol\_pH-metric high logP.t3r**

Experiment start time: **3/24/2018 1:34:06 AM**  
 Analyst: **Dorothy Levorse**  
 Instrument ID: **T312060**

## Assay Settings (continued)

| Setting                             | Value          | Original Value | Date/Time changed | Imported from |
|-------------------------------------|----------------|----------------|-------------------|---------------|
| <b>Titration 3</b>                  |                |                |                   |               |
| Titrate from                        | Low to high pH |                |                   |               |
| Add additional water                | 0.00 mL        |                |                   |               |
| Additional partition solvent volume | 0.400 mL       |                |                   |               |
| Additional partition solvent added  | Automatic      |                |                   |               |
| After pH adjust stir for            | 30 seconds     |                |                   |               |
| Stir to allow partitioning for      | 15 seconds     |                |                   |               |
| Stirrer speed for partitioning      | 60%            |                |                   |               |
| <b>Data Point Stability</b>         |                |                |                   |               |
| Stir during data point collection   | No             |                |                   |               |
| Delay before data point collection  | 0 seconds      |                |                   |               |
| Number of points to average         | 20 points      |                |                   |               |
| Time interval between points        | 0.50 seconds   |                |                   |               |
| Required maximum standard deviation | 0.00100 dpH/dt |                |                   |               |
| Stability timeout after             | 60 seconds     |                |                   |               |

## Calibration Settings

| Setting                   | Value  | Date/Time changed    | Imported from             |
|---------------------------|--------|----------------------|---------------------------|
| Four-Plus alpha           | 0.119  | 3/24/2018 1:34:06 AM | C:\Sirius_T3\HCl18C23.t3r |
| Four-Plus S               | 0.9972 | 3/24/2018 1:34:06 AM | C:\Sirius_T3\HCl18C23.t3r |
| Four-Plus jH              | 0.9    | 3/24/2018 1:34:06 AM | C:\Sirius_T3\HCl18C23.t3r |
| Four-Plus jOH             | -0.3   | 3/24/2018 1:34:06 AM | C:\Sirius_T3\HCl18C23.t3r |
| Base concentration factor | 1.003  | 3/24/2018 1:34:06 AM | C:\Sirius_T3\KOH18C23.t3r |
| Acid concentration factor | 0.997  | 3/24/2018 1:34:06 AM | C:\Sirius_T3\HCl18C23.t3r |

## Instrument Settings

| Setting              | Value                      | Batch Id    | Install date           |
|----------------------|----------------------------|-------------|------------------------|
| Instrument owner     | Merck                      |             |                        |
| Instrument ID        | T312060                    |             |                        |
| Instrument type      | T3 Simulator               |             |                        |
| Software version     | 1.1.3.0                    |             |                        |
| Dispenser module     |                            | T3DM1200361 | 3/31/2009 6:24:52 AM   |
| Dispenser 0          | Water                      |             | 3/31/2009 6:25:05 AM   |
| Syringe volume       | 2.5 mL                     |             |                        |
| Firmware version     | 1.2.1(r2)                  |             |                        |
| Titrant              | Water (0.15 M KCl)         | 02-06-2018  | 3/16/2018 11:09:18 AM  |
| Dispenser 2          | Acid                       |             | 3/31/2009 6:25:11 AM   |
| Syringe volume       | 0.5 mL                     |             |                        |
| Firmware version     | 1.2.1(r2)                  |             |                        |
| Titrant              | Acid (0.5 M HCl)           | 03-16-2018  | 3/16/2018 10:56:23 AM  |
| Dispenser 1          | Base                       |             | 3/31/2009 6:25:21 AM   |
| Syringe volume       | 0.5 mL                     |             |                        |
| Firmware version     | 1.2.1(r2)                  |             |                        |
| Titrant              | Base (0.5 M KOH)           | 3/22/2018   | 3/23/2018 9:34:17 AM   |
| Dispenser 5          | Cosolvent                  |             | 3/31/2009 6:26:24 AM   |
| Syringe volume       | 2.5 mL                     |             |                        |
| Firmware version     | 1.2.1(r2)                  |             |                        |
| Distribution valve 5 | Distribution Valve         |             | 3/31/2009 6:28:19 AM   |
| Firmware version     | 1.1.3                      |             |                        |
| Port A               | Methanol (80%, 0.15 M KCl) | 02-08-2018  | 3/6/2018 10:28:59 AM   |
| Port B               | Cyclohexane                | 11-01-17    | 2/27/2018 11:37:57 AM  |
| Dispenser 3          | Buffer                     |             | 8/3/2010 6:05:16 AM    |
| Syringe volume       | 0.5 mL                     |             |                        |
| Firmware version     | 1.2.1(r2)                  |             |                        |
| Titrant              | Dodecane                   | 2018/01/31  | 2/28/2018 11:18:04 AM  |
| Dispenser 6          | Octanol                    |             | 10/22/2010 11:52:43 AM |



Sample name: **M04\_octanol** Experiment start time: **3/24/2018 1:34:06 AM**  
 Assay name: **pH-metric high logP** Analyst: **Dorothy Levorse**  
 Assay ID: **18C-24002** Instrument ID: **T312060**  
 Filename: **C:\Sirius\_T3\Mehtap\20180323\_exp33\_logP\_T3-2\18C-24002\_M04\_octanol\_pH-metric high logP.t3r**

## Instrument Settings (continued)

| Setting                                   | Value                      | Batch Id    | Install date           |
|-------------------------------------------|----------------------------|-------------|------------------------|
| Syringe volume                            | 0.5 mL                     |             |                        |
| Firmware version                          | 1.2.1(r2)                  |             |                        |
| Titrant                                   | Octanol                    | 01-31-2018  | 2/27/2018 10:59:35 AM  |
| Titrator                                  |                            | T3TM1200161 | 3/31/2009 6:24:17 AM   |
| Horizontal axis firmware version          | 1.17 AI1DI2DO2 Stepper 2   |             |                        |
| Vertical axis firmware version            | 1.17 AI1DI2DO2 Stepper 2   |             |                        |
| Chassis I/O firmware version              | 1.11 AI1DI0DO4 Norgren I/O |             |                        |
| Probe I/O firmware version                | 1.1.1                      |             |                        |
| Electrode                                 | T3 Electrode               | T3E0923     | 1/23/2018 3:01:00 PM   |
| E0 calibration                            | +4.89 mV                   |             | 3/24/2018 1:34:34 AM   |
| Filling solution                          | 3M KCl                     | KCL097      | 3/23/2018 9:29:07 AM   |
| Liquids                                   |                            |             |                        |
| Wash 1                                    | 50% IPA:50% Water          |             | 3/23/2018 9:29:12 AM   |
| Wash 2                                    | 0.5% Triton X-100 in H2O   |             | 3/23/2018 9:29:15 AM   |
| Buffer position 1                         | pH7 Wash                   |             | 3/23/2018 9:29:19 AM   |
| Buffer position 2                         | pH 7                       |             | 3/23/2018 9:29:21 AM   |
| Storage position                          |                            |             | 3/23/2018 9:30:23 AM   |
| Wash water                                | 7.7e+003 mL                | 03-12-2018  | 3/12/2018 9:25:04 AM   |
| Waste                                     | 2.5e+003 mL                |             | 3/12/2018 9:24:49 AM   |
| Temperature controller                    |                            |             | 8/5/2010 7:35:13 AM    |
| Turbidity detector                        |                            |             | 3/31/2009 6:24:45 AM   |
| Spectrometer                              |                            | 074811      | 11/23/2010 12:22:28 PM |
| Dip probe                                 |                            | 10196       |                        |
| Wavelength coefficient A0                 | 183.333                    |             |                        |
| Wavelength coefficient A1                 | 2.21568                    |             |                        |
| Wavelength coefficient A2                 | -0.000289308               |             |                        |
| Total lamp lit time                       | 162:53:01                  |             | 11/23/2010 12:22:28 PM |
| Calibrated on                             | 2/27/2018 11:40:38 AM      |             |                        |
| Integration time                          | 40                         |             |                        |
| Scans averaged                            | 10                         |             |                        |
| Autoloader                                |                            | T3AL1200345 | 11/10/2015 10:34:13 AM |
| Left-right axis firmware version          | 1.17 AI1DI2DO2 Stepper 2   |             |                        |
| Front-back axis firmware version          | 1.17 AI1DI2DO2 Stepper 2   |             |                        |
| Vertical axis firmware version            | 1.17 AI1DI2DO2 Stepper 2   |             |                        |
| Chassis I/O firmware version              | 1.11 AI1DI0DO4 Norgren I/O |             |                        |
| Configuration                             |                            |             |                        |
| Alternate titration position              | Titration position         |             |                        |
| Alternate reference position              | Reference position         |             |                        |
| Maximum standard vial volume              | 3.50 mL                    |             |                        |
| Maximum alternate vial volume             | 25.00 mL                   |             |                        |
| Automatic action idle period              | 5 minute(s)                |             |                        |
| Titrant tube volume                       | 1.3 mL                     |             |                        |
| Syringe flush count                       | 3.50                       |             |                        |
| Flowing wash pump volume                  | 20.0 mL                    |             |                        |
| Flowing wash stir duration                | 5 s                        |             |                        |
| Flowing wash stir speed                   | 30%                        |             |                        |
| Solvent wash stir duration                | 5 s                        |             |                        |
| Solvent wash stir speed                   | 30%                        |             |                        |
| Surfactant wash stir duration             | 5 s                        |             |                        |
| Surfactant wash stir speed                | 30%                        |             |                        |
| E0 calibration minimum number of points   | 10                         |             |                        |
| E0 calibration maximum standard deviation | 0.01500                    |             |                        |
| E0 calibration timeout period             | 60 s                       |             |                        |
| E0 calibration stir duration              | 5 s                        |             |                        |
| E0 calibration preparation stir speed     | 30%                        |             |                        |
| E0 calibration buffer wash stir duration  | 5 s                        |             |                        |
| E0 calibration buffer wash stir speed     | 30%                        |             |                        |
| E0 calibration reading stir speed         | 0%                         |             |                        |



## Assay Settings

Sample name: **M04\_octanol** Experiment start time: **3/24/2018 1:34:06 AM**  
Assay name: **pH-metric high logP** Analyst: **Dorothy Levorse**  
Assay ID: **18C-24002** Instrument ID: **T312060**  
Filename: **C:\Sirius\_T3\Mehtap\20180323\_exp33\_logP\_T3-2\18C-24002\_M04\_octanol\_pH-metric high logP.t3r**

### Instrument Settings (continued)

| Setting                                     | Value   | Batch Id | Install date |
|---------------------------------------------|---------|----------|--------------|
| Spectrometer calibration stir duration      | 5 s     |          |              |
| Spectrometer calibration stir speed         | 30%     |          |              |
| Spectrometer calibration wash pump volume   | 20.0 mL |          |              |
| Spectrometer calibration wash stir duration | 5 s     |          |              |
| Spectrometer calibration wash stir speed    | 30%     |          |              |
| Overhead dispense height                    | 10000   |          |              |

### Refinement Settings

| Setting                        | Value    | Default value |
|--------------------------------|----------|---------------|
| Turbidity detection method     | None     | None          |
| Turbidity wavelength to assess | 500.0 nm | 500.0 nm      |
| Turbidity maximum absorbance   | 0.100    | 0.100         |
| Turbidity probe threshold      | 50.00    | 50.00         |
