# Supplementary material for: Octanol-water partition coefficient measurements for the SAMPL6 Blind Prediction Challenge
Source: bioRxiv or medRxiv preprint supplement (doi:10.1101/757393), 2019-12-02
Supplement: Supplementary file [file media-2.zip]

Sample name: **M15\_octanol**  
 Assay name: **pH-metric high logP**  
 Assay ID: **18B-28002**  
 Filename: **C:\Sirius\_T3\Mehtap\20180227\_exp27\_logP\_T3-2\18B-28002\_M15\_octanol\_pH-metric high logP.t3r**

Experiment start time: **2/28/2018 1:10:47 AM**  
 Analyst: **Pion**  
 Instrument ID: **T312060**

## pH-metric Result

logP (XH2 2+) -2.38  
 logP (XH +) -4.96 ±2.15 (n=47)  
 logP (neutral X) 1.92 ±0.01 (n=47)

### 18B-28002 Points 1 to 35

M15\_octanol concentration factor 0.761  
 Carbonate 0.1910 mM  
 Acidity error 0.00862 mM

### 18B-28002 Points 36 to 72

M15\_octanol concentration factor 0.839  
 Carbonate 0.2848 mM  
 Acidity error -0.02801 mM

### 18B-28002 Points 73 to 106

M15\_octanol concentration factor 0.903  
 Carbonate 0.2174 mM  
 Acidity error 0.16739 mM

## Warnings and errors

Errors None  
 Warnings One or more logP values out of range

## Sample logD and percent species

| pH     | M15_octanol<br>logD | M15_octanol<br>M15_octanolH2 | M15_octanol<br>M15_octanolH | M15_octanol<br>M15_octanol | M15_octanol<br>M15_octanolH2* | M15_octanol<br>M15_octanolH* | M15_octanol<br>M15_octanol* | Comment       |
|--------|---------------------|------------------------------|-----------------------------|----------------------------|-------------------------------|------------------------------|-----------------------------|---------------|
| 1.000  | -2.38               | 97.03 %                      | 2.55 %                      | 0.00 %                     | 0.40 %                        | 0.00 %                       | 0.01 %                      | Stomach<br>pH |
| 1.200  | -2.37               | 95.59 %                      | 3.98 %                      | 0.00 %                     | 0.40 %                        | 0.00 %                       | 0.03 %                      |               |
| 2.000  | -1.92               | 78.23 %                      | 20.58 %                     | 0.01 %                     | 0.33 %                        | 0.00 %                       | 0.86 %                      | Blood pH      |
| 3.000  | -0.52               | 21.05 %                      | 55.37 %                     | 0.28 %                     | 0.09 %                        | 0.00 %                       | 23.22 %                     |               |
| 4.000  | 0.59                | 0.72 %                       | 18.93 %                     | 0.95 %                     | 0.00 %                        | 0.00 %                       | 79.40 %                     |               |
| 5.000  | 1.45                | 0.01 %                       | 2.30 %                      | 1.15 %                     | 0.00 %                        | 0.00 %                       | 96.54 %                     |               |
| 6.000  | 1.84                | 0.00 %                       | 0.24 %                      | 1.18 %                     | 0.00 %                        | 0.00 %                       | 98.59 %                     |               |
| 6.500  | 1.90                | 0.00 %                       | 0.07 %                      | 1.18 %                     | 0.00 %                        | 0.00 %                       | 98.75 %                     |               |
| 7.000  | 1.91                | 0.00 %                       | 0.02 %                      | 1.18 %                     | 0.00 %                        | 0.00 %                       | 98.80 %                     |               |
| 7.400  | 1.92                | 0.00 %                       | 0.01 %                      | 1.18 %                     | 0.00 %                        | 0.00 %                       | 98.81 %                     |               |
| 8.000  | 1.92                | 0.00 %                       | 0.00 %                      | 1.18 %                     | 0.00 %                        | 0.00 %                       | 98.82 %                     |               |
| 9.000  | 1.92                | 0.00 %                       | 0.00 %                      | 1.18 %                     | 0.00 %                        | 0.00 %                       | 98.82 %                     |               |
| 10.000 | 1.92                | 0.00 %                       | 0.00 %                      | 1.18 %                     | 0.00 %                        | 0.00 %                       | 98.82 %                     |               |
| 11.000 | 1.92                | 0.00 %                       | 0.00 %                      | 1.18 %                     | 0.00 %                        | 0.00 %                       | 98.82 %                     |               |
| 12.000 | 1.92                | 0.00 %                       | 0.00 %                      | 1.18 %                     | 0.00 %                        | 0.00 %                       | 98.82 %                     |               |

Sample name: **M15\_octanol**  
 Assay name: **pH-metric high logP**  
 Assay ID: **18B-28002**  
 Filename: **C:\Sirius\_T3\Mehtap\20180227\_exp27\_logP\_T3-2\18B-28002\_M15\_octanol\_pH-metric high logP.t3r**

Experiment start time: **2/28/2018 1:10:47 AM**  
 Analyst: **Pion**  
 Instrument ID: **T312060**

## Graphs

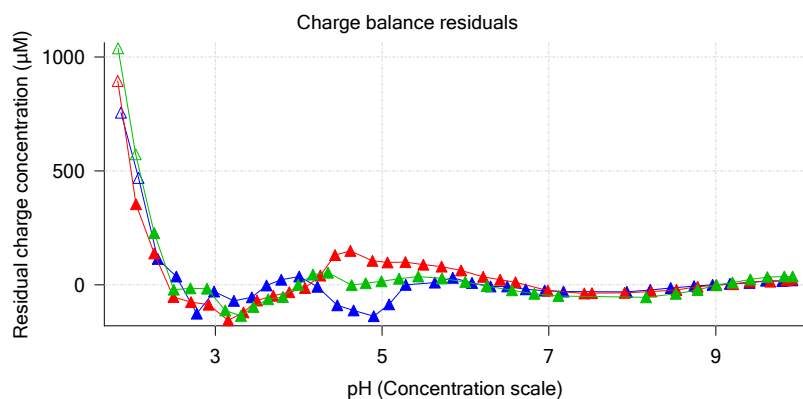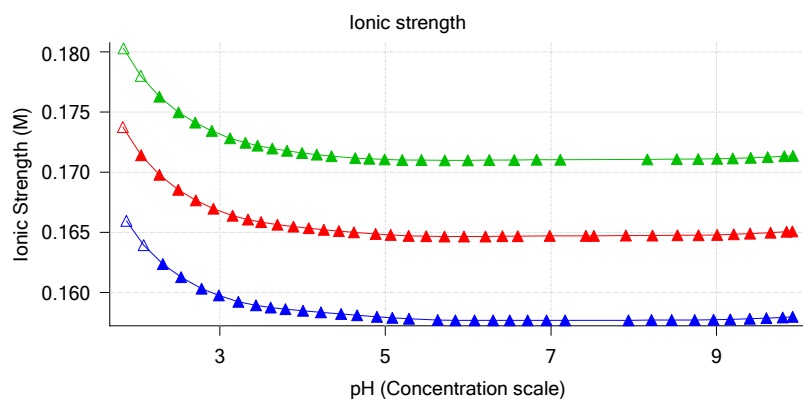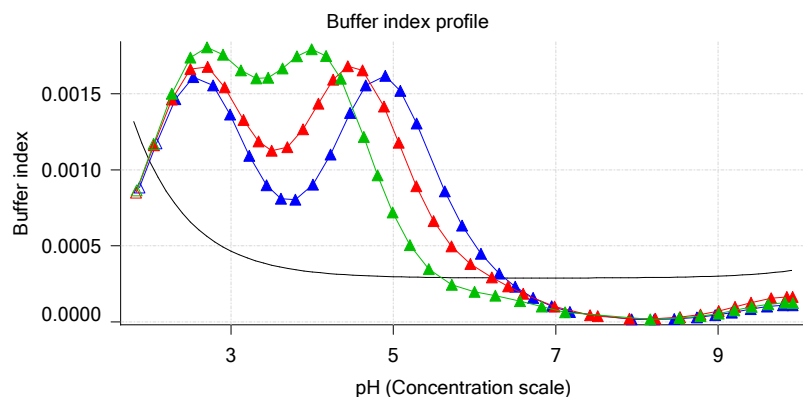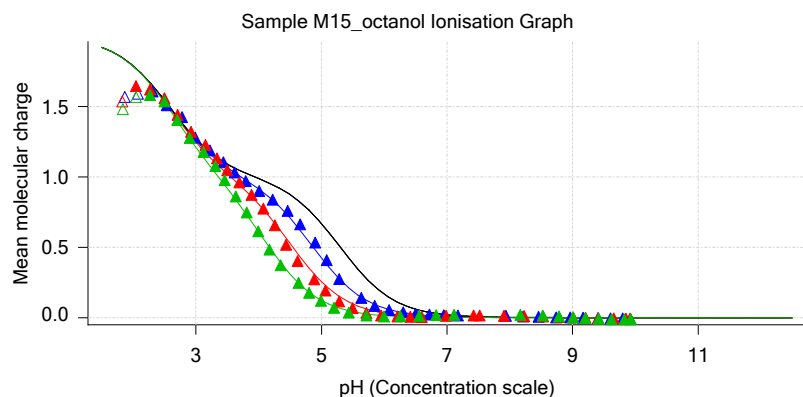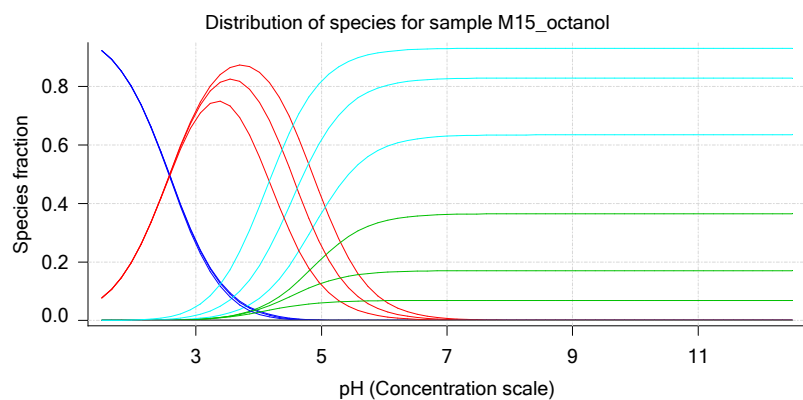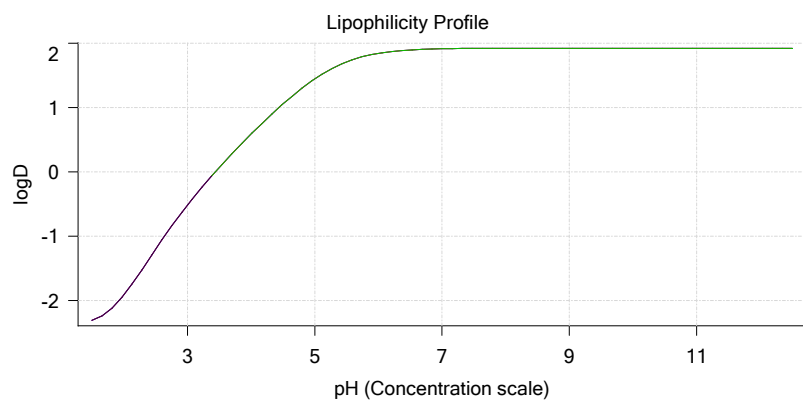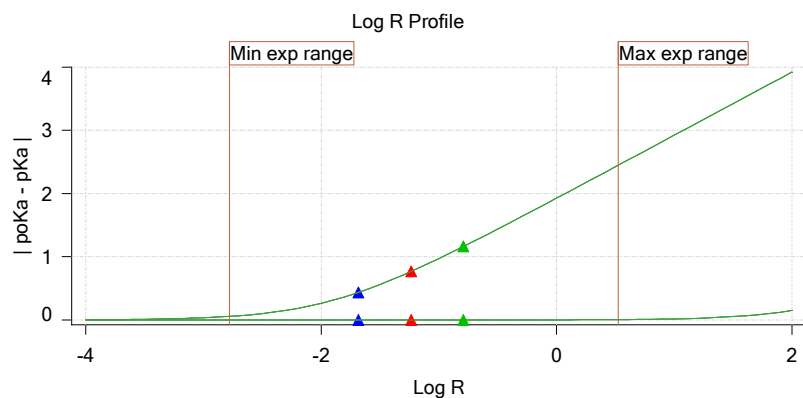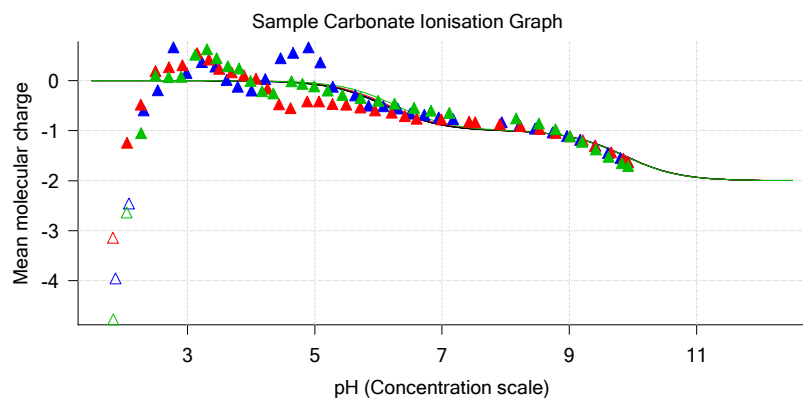

Sample name: **M15\_octanol**  
 Assay name: **pH-metric high logP**  
 Assay ID: **18B-28002**  
 Filename: **C:\Sirius\_T3\Mehtap\20180227\_exp27\_logP\_T3-2\18B-28002\_M15\_octanol\_pH-metric high logP.t3r**

Experiment start time: **2/28/2018 1:10:47 AM**  
 Analyst: **Pion**  
 Instrument ID: **T312060**

## Graphs (continued)

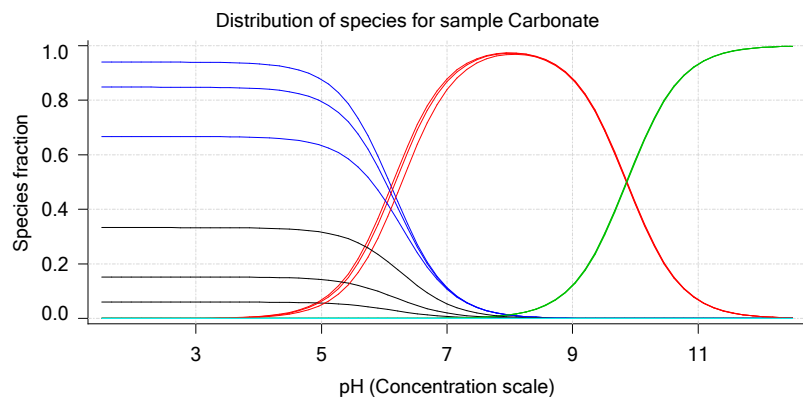

Sample name: **M15\_octanol**  
 Assay name: **pH-metric high logP**  
 Assay ID: **18B-28002**  
 Filename: **C:\Sirius\_T3\Mehtap\20180227\_exp27\_logP\_T3-2\18B-28002\_M15\_octanol\_pH-metric high logP.t3r**

Experiment start time: **2/28/2018 1:10:47 AM**  
 Analyst: **Pion**  
 Instrument ID: **T312060**

## pH-metric high logP Titration 1 of 3 18B-28002 Points 1 to 35

### Overall results

RMSD 0.336  
 Average ionic strength 0.158 M  
 Average temperature 25.0°C  
 Partition ratio 0.0208 : 1  
 Analyte concentration range 3493.3 µM to 3618.9 µM  
 Total points considered 33 of 35

### Warnings and errors

Errors None  
 Warnings One or more logP values out of range

### Four-Plus parameters

Alpha 0.130 2/28/2018 1:10:47 AM C:\Sirius\_T3\HCl18B27.t3r  
 S 0.9970 2/28/2018 1:10:47 AM C:\Sirius\_T3\HCl18B27.t3r  
 jH 0.8 2/28/2018 1:10:47 AM C:\Sirius\_T3\HCl18B27.t3r  
 jOH -0.4 2/28/2018 1:10:47 AM C:\Sirius\_T3\HCl18B27.t3r

### Titrants

0.50 M HCl 0.993513 2/28/2018 1:10:47 AM C:\Sirius\_T3\HCl18B27.t3r  
 0.50 M KOH 0.999845 2/28/2018 1:10:47 AM C:\Sirius\_T3\KOH18B27.t3r

### Sample

M15\_octanol concentration factor 0.761  
 Base pKa 1 2.58  
 Base pKa 2 5.30  
 logP (XH2 2+) -2.38  
 logP (XH +) -9.58  
 logP (neutral X) 1.85

### Sample graphs

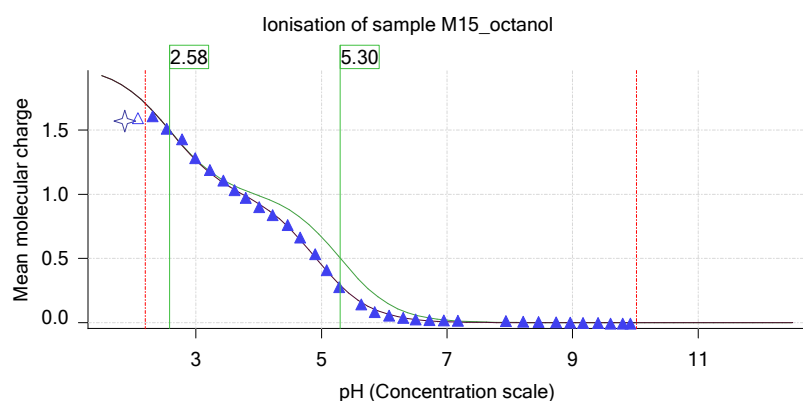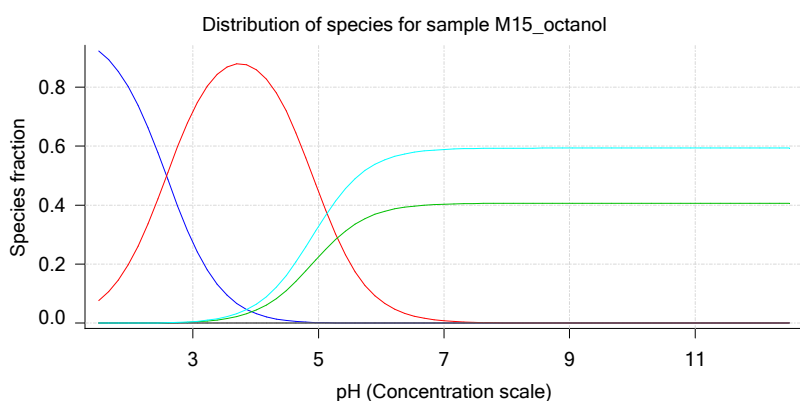

Sample name: **M15\_octanol**  
 Assay name: **pH-metric high logP**  
 Assay ID: **18B-28002**  
 Filename: **C:\Sirius\_T3\Mehtap\20180227\_exp27\_logP\_T3-2\18B-28002\_M15\_octanol\_pH-metric high logP.t3r**

Experiment start time: **2/28/2018 1:10:47 AM**  
 Analyst: **Pion**  
 Instrument ID: **T312060**

## Sample graphs (continued)

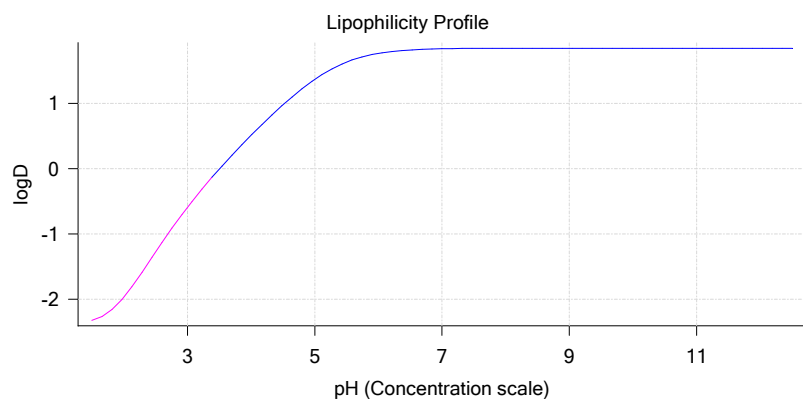

## Sample logD and percent species

| pH     | M15_octanol<br>logD | M15_octanol<br>M15_octanolH2 | M15_octanol<br>M15_octanolH | M15_octanol<br>M15_octanol | M15_octanol<br>M15_octanolH2* | M15_octanol<br>M15_octanolH* | M15_octanol<br>M15_octanol* | Comment       |
|--------|---------------------|------------------------------|-----------------------------|----------------------------|-------------------------------|------------------------------|-----------------------------|---------------|
| 1.000  | -2.38               | 97.43 %                      | 2.56 %                      | 0.00 %                     | 0.01 %                        | 0.00 %                       | 0.00 %                      | Stomach<br>pH |
| 1.200  | -2.37               | 95.99 %                      | 4.00 %                      | 0.00 %                     | 0.01 %                        | 0.00 %                       | 0.00 %                      |               |
| 2.000  | -1.97               | 79.15 %                      | 20.82 %                     | 0.01 %                     | 0.01 %                        | 0.00 %                       | 0.02 %                      |               |
| 3.000  | -0.59               | 27.30 %                      | 71.81 %                     | 0.36 %                     | 0.00 %                        | 0.00 %                       | 0.53 %                      |               |
| 4.000  | 0.51                | 3.27 %                       | 86.11 %                     | 4.32 %                     | 0.00 %                        | 0.00 %                       | 6.30 %                      | Blood pH      |
| 5.000  | 1.37                | 0.17 %                       | 44.71 %                     | 22.41 %                    | 0.00 %                        | 0.00 %                       | 32.72 %                     |               |
| 6.000  | 1.77                | 0.00 %                       | 7.50 %                      | 37.60 %                    | 0.00 %                        | 0.00 %                       | 54.90 %                     |               |
| 6.500  | 1.82                | 0.00 %                       | 2.50 %                      | 39.63 %                    | 0.00 %                        | 0.00 %                       | 57.87 %                     |               |
| 7.000  | 1.84                | 0.00 %                       | 0.80 %                      | 40.32 %                    | 0.00 %                        | 0.00 %                       | 58.87 %                     |               |
| 7.400  | 1.84                | 0.00 %                       | 0.32 %                      | 40.52 %                    | 0.00 %                        | 0.00 %                       | 59.16 %                     |               |
| 8.000  | 1.85                | 0.00 %                       | 0.08 %                      | 40.62 %                    | 0.00 %                        | 0.00 %                       | 59.30 %                     |               |
| 9.000  | 1.85                | 0.00 %                       | 0.01 %                      | 40.64 %                    | 0.00 %                        | 0.00 %                       | 59.35 %                     |               |
| 10.000 | 1.85                | 0.00 %                       | 0.00 %                      | 40.65 %                    | 0.00 %                        | 0.00 %                       | 59.35 %                     |               |
| 11.000 | 1.85                | 0.00 %                       | 0.00 %                      | 40.65 %                    | 0.00 %                        | 0.00 %                       | 59.35 %                     |               |
| 12.000 | 1.85                | 0.00 %                       | 0.00 %                      | 40.65 %                    | 0.00 %                        | 0.00 %                       | 59.35 %                     |               |

## Carbonate and acidity

 Carbonate 0.191 mM  
 Acidity error 0.009 mM

## Other graphs

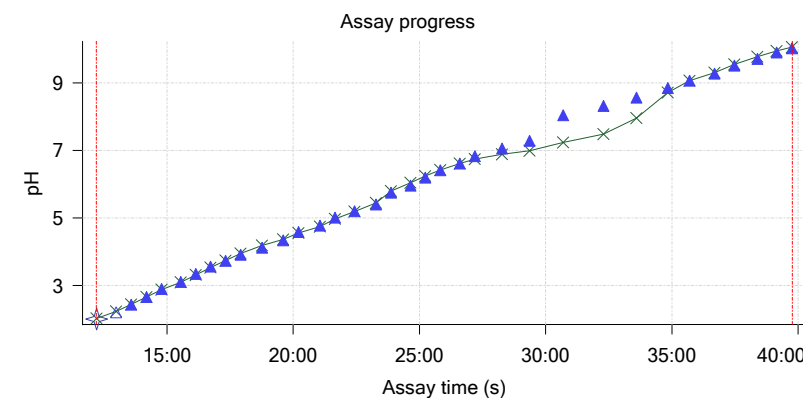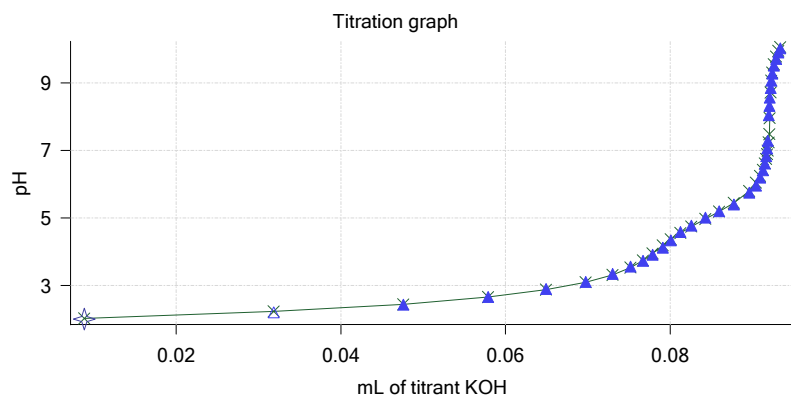

Sample name: **M15\_octanol**  
 Assay name: **pH-metric high logP**  
 Assay ID: **18B-28002**  
 Filename: **C:\Sirius\_T3\Mehtap\20180227\_exp27\_logP\_T3-2\18B-28002\_M15\_octanol\_pH-metric high logP.t3r**

Experiment start time: **2/28/2018 1:10:47 AM**  
 Analyst: **Pion**  
 Instrument ID: **T312060**

## Other graphs (continued)

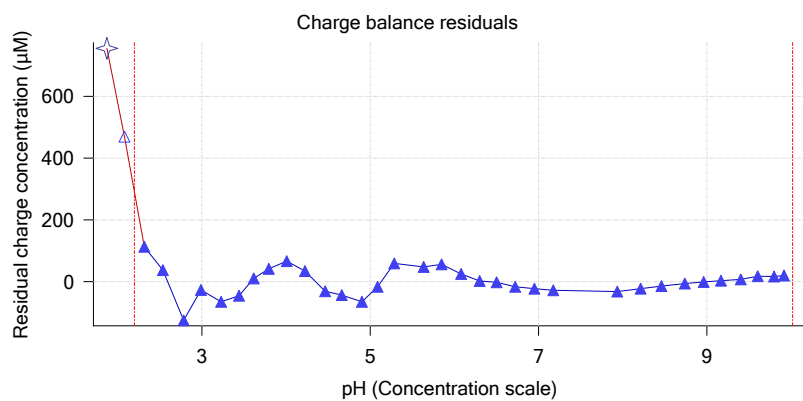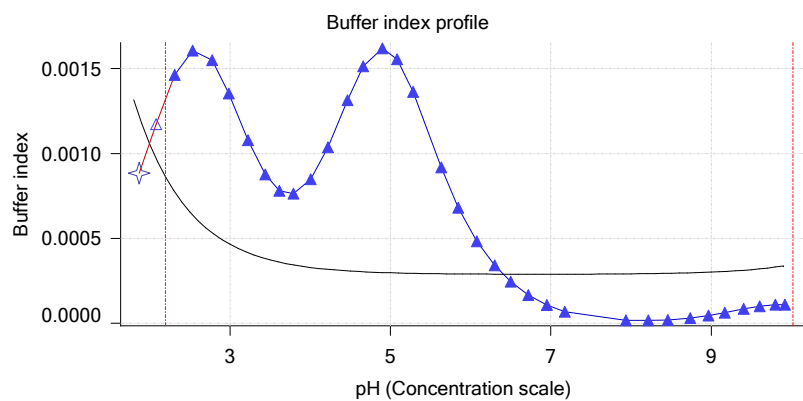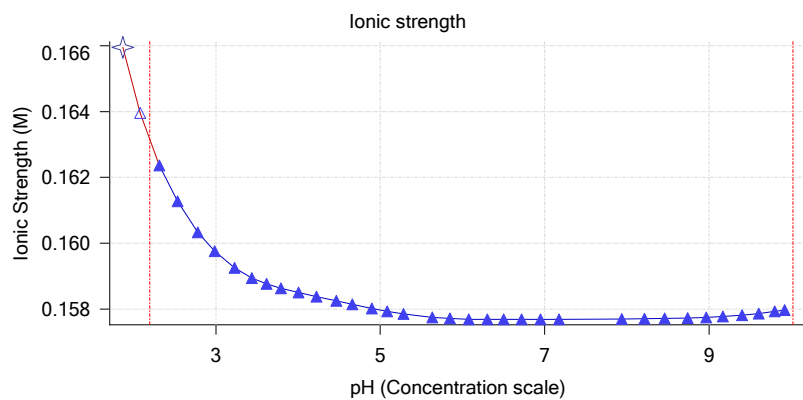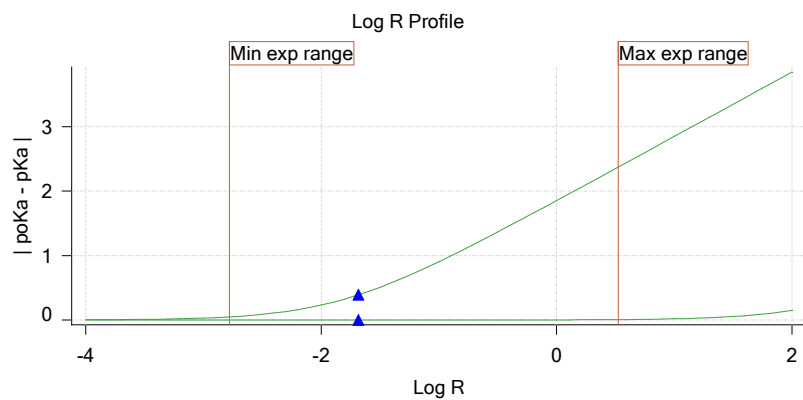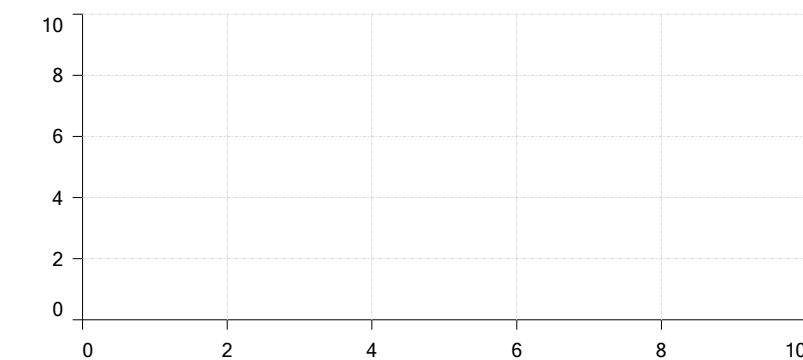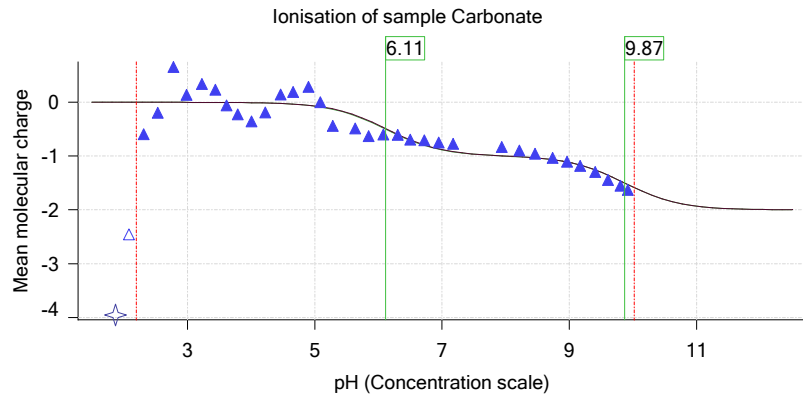

Sample name: **M15\_octanol** Experiment start time: **2/28/2018 1:10:47 AM**  
 Assay name: **pH-metric high logP** Analyst: **Pion**  
 Assay ID: **18B-28002** Instrument ID: **T312060**  
 Filename: **C:\Sirius\_T3\Mehtap\20180227\_exp27\_logP\_T3-2\18B-28002\_M15\_octanol\_pH-metric high logP.t3r**

## pH-metric high logP Titration 2 of 3 18B-28002 Points 36 to 72

### Overall results

RMSD 0.387  
 Average ionic strength 0.166 M  
 Average temperature 25.0°C  
 Partition ratio 0.0581 : 1  
 Analyte concentration range 3113.6 µM to 3230.1 µM  
 Total points considered 36 of 37

### Warnings and errors

Errors None  
 Warnings One or more logP values out of range

### Four-Plus parameters

Alpha 0.130 2/28/2018 1:10:47 AM C:\Sirius\_T3\HCl18B27.t3r  
 S 0.9970 2/28/2018 1:10:47 AM C:\Sirius\_T3\HCl18B27.t3r  
 jH 0.8 2/28/2018 1:10:47 AM C:\Sirius\_T3\HCl18B27.t3r  
 jOH -0.4 2/28/2018 1:10:47 AM C:\Sirius\_T3\HCl18B27.t3r

### Titrants

0.50 M HCl 0.993513 2/28/2018 1:10:47 AM C:\Sirius\_T3\HCl18B27.t3r  
 0.50 M KOH 0.999845 2/28/2018 1:10:47 AM C:\Sirius\_T3\KOH18B27.t3r

### Sample

M15\_octanol concentration factor 0.839  
 Base pKa 1 2.58  
 Base pKa 2 5.30  
 logP (XH2 2+) -2.38  
 logP (XH +) -3.43  
 logP (neutral X) 1.98

### Sample graphs

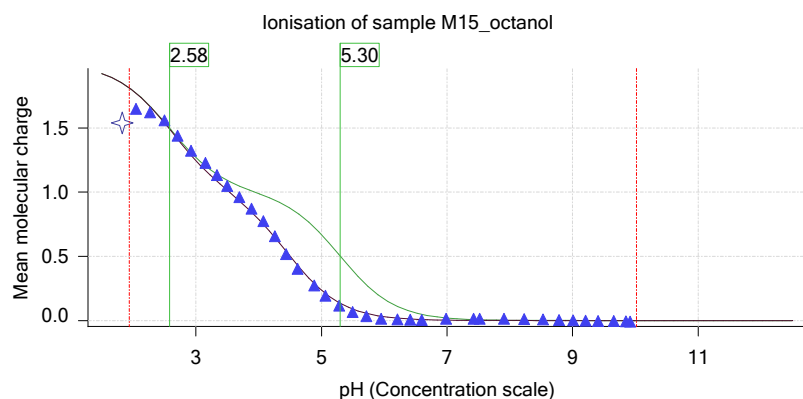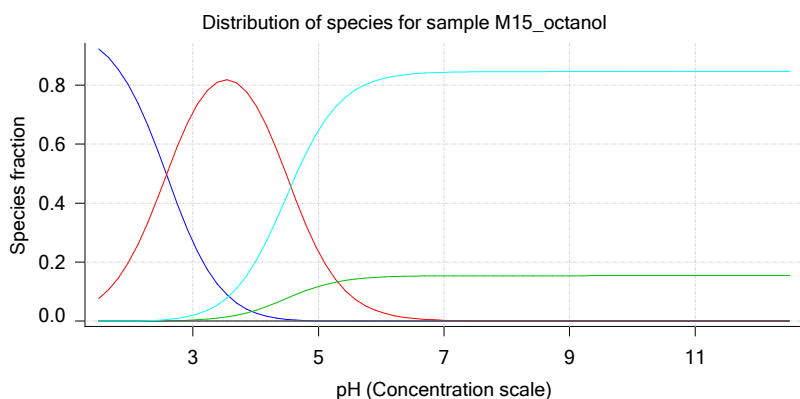

Sample name: **M15\_octanol**  
Assay name: **pH-metric high logP**  
Assay ID: **18B-28002**  
Filename: **C:\Sirius\_T3\Mehtap\20180227\_exp27\_logP\_T3-2\18B-28002\_M15\_octanol\_pH-metric high logP.t3r**

Experiment start time: **2/28/2018 1:10:47 AM**  
Analyst: **Pion**  
Instrument ID: **T312060**

## Sample graphs (continued)

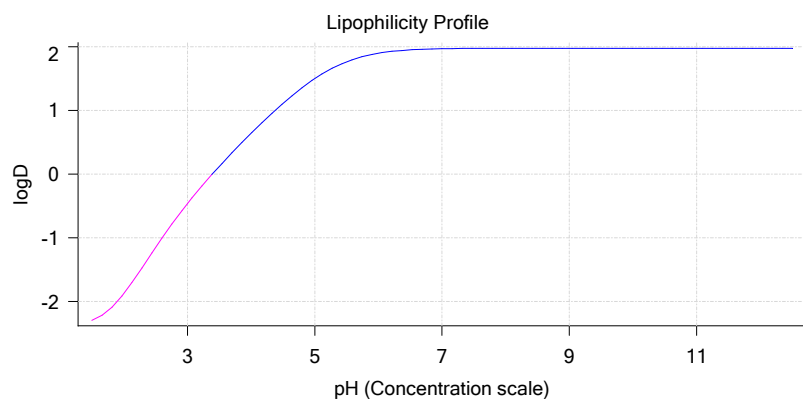

## Sample logD and percent species

| pH     | M15_octanol<br>logD | M15_octanol<br>M15_octanolH2 | M15_octanol<br>M15_octanolH | M15_octanol<br>M15_octanol | M15_octanol<br>M15_octanolH2* | M15_octanol<br>M15_octanolH* | M15_octanol<br>M15_octanol* | Comment       |
|--------|---------------------|------------------------------|-----------------------------|----------------------------|-------------------------------|------------------------------|-----------------------------|---------------|
| 1.000  | -2.38               | 97.41 %                      | 2.56 %                      | 0.00 %                     | 0.02 %                        | 0.00 %                       | 0.00 %                      | Stomach<br>pH |
| 1.200  | -2.36               | 95.97 %                      | 4.00 %                      | 0.00 %                     | 0.02 %                        | 0.00 %                       | 0.00 %                      |               |
| 2.000  | -1.88               | 79.11 %                      | 20.81 %                     | 0.01 %                     | 0.02 %                        | 0.00 %                       | 0.06 %                      |               |
| 3.000  | -0.46               | 26.91 %                      | 70.78 %                     | 0.35 %                     | 0.01 %                        | 0.00 %                       | 1.95 %                      |               |
| 4.000  | 0.64                | 2.79 %                       | 73.34 %                     | 3.68 %                     | 0.00 %                        | 0.00 %                       | 20.19 %                     | Blood pH      |
| 5.000  | 1.50                | 0.09 %                       | 23.48 %                     | 11.77 %                    | 0.00 %                        | 0.00 %                       | 64.66 %                     |               |
| 6.000  | 1.90                | 0.00 %                       | 2.98 %                      | 14.94 %                    | 0.00 %                        | 0.00 %                       | 82.08 %                     |               |
| 6.500  | 1.95                | 0.00 %                       | 0.96 %                      | 15.25 %                    | 0.00 %                        | 0.00 %                       | 83.79 %                     |               |
| 7.000  | 1.97                | 0.00 %                       | 0.31 %                      | 15.35 %                    | 0.00 %                        | 0.00 %                       | 84.34 %                     |               |
| 7.400  | 1.97                | 0.00 %                       | 0.12 %                      | 15.38 %                    | 0.00 %                        | 0.00 %                       | 84.50 %                     |               |
| 8.000  | 1.97                | 0.00 %                       | 0.03 %                      | 15.39 %                    | 0.00 %                        | 0.00 %                       | 84.57 %                     |               |
| 9.000  | 1.98                | 0.00 %                       | 0.00 %                      | 15.40 %                    | 0.00 %                        | 0.00 %                       | 84.60 %                     |               |
| 10.000 | 1.98                | 0.00 %                       | 0.00 %                      | 15.40 %                    | 0.00 %                        | 0.00 %                       | 84.60 %                     |               |
| 11.000 | 1.98                | 0.00 %                       | 0.00 %                      | 15.40 %                    | 0.00 %                        | 0.00 %                       | 84.60 %                     |               |
| 12.000 | 1.98                | 0.00 %                       | 0.00 %                      | 15.40 %                    | 0.00 %                        | 0.00 %                       | 84.60 %                     |               |

## Carbonate and acidity

Carbonate 0.285 mM  
Acidity error -0.028 mM

## Other graphs

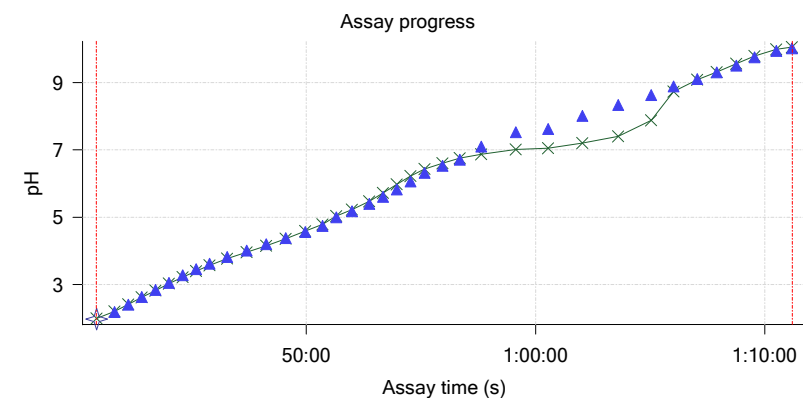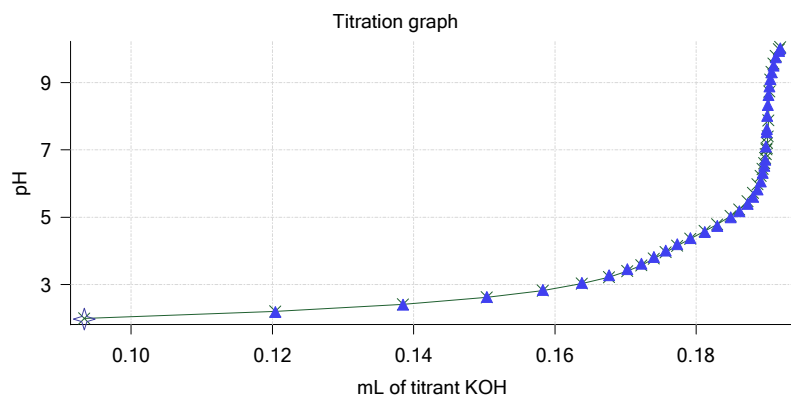



Sample name: **M15\_octanol**  
 Assay name: **pH-metric high logP**  
 Assay ID: **18B-28002**  
 Filename: **C:\Sirius\_T3\Mehtap\20180227\_exp27\_logP\_T3-2\18B-28002\_M15\_octanol\_pH-metric high logP.t3r**

Experiment start time: **2/28/2018 1:10:47 AM**  
 Analyst: **Pion**  
 Instrument ID: **T312060**

## Other graphs (continued)

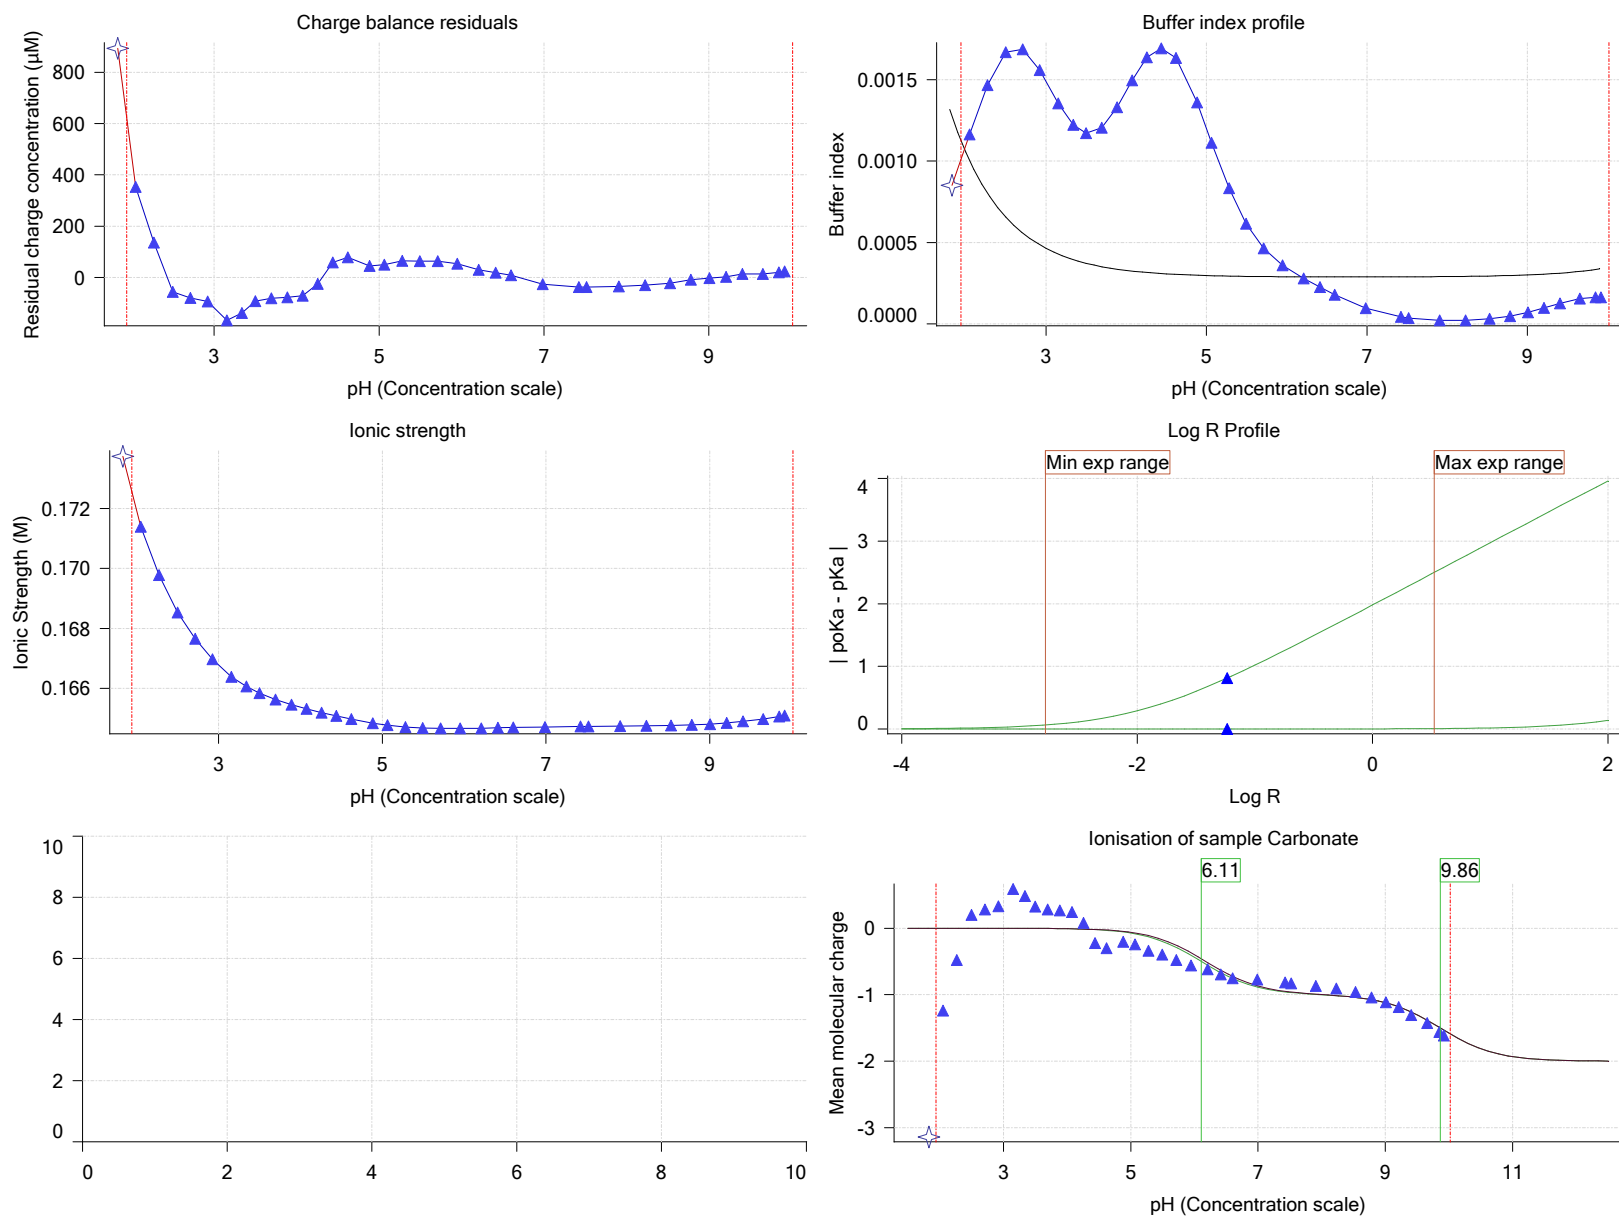

Sample name: **M15\_octanol**  
 Assay name: **pH-metric high logP**  
 Assay ID: **18B-28002**  
 Filename: **C:\Sirius\_T3\Mehtap\20180227\_exp27\_logP\_T3-2\18B-28002\_M15\_octanol\_pH-metric high logP.t3r**

Experiment start time: **2/28/2018 1:10:47 AM**  
 Analyst: **Pion**  
 Instrument ID: **T312060**

pH-metric high logP Titration 3 of 3 18B-28002 Points 73 to 106

## Overall results

RMSD 0.501  
 Average ionic strength 0.172 M  
 Average temperature 25.0°C  
 Partition ratio 0.1616 : 1  
 Analyte concentration range 2625.5 µM to 2712.6 µM  
 Total points considered 32 of 34

## Warnings and errors

Errors None  
 Warnings One or more logP values out of range

## Four-Plus parameters

Alpha 0.130 2/28/2018 1:10:47 AM C:\Sirius\_T3\HCl18B27.t3r  
 S 0.9970 2/28/2018 1:10:47 AM C:\Sirius\_T3\HCl18B27.t3r  
 jH 0.8 2/28/2018 1:10:47 AM C:\Sirius\_T3\HCl18B27.t3r  
 jOH -0.4 2/28/2018 1:10:47 AM C:\Sirius\_T3\HCl18B27.t3r

## Titrants

0.50 M HCl 0.993513 2/28/2018 1:10:47 AM C:\Sirius\_T3\HCl18B27.t3r  
 0.50 M KOH 0.999845 2/28/2018 1:10:47 AM C:\Sirius\_T3\KOH18B27.t3r

## Sample

M15\_octanol concentration factor 0.903  
 Base pKa 1 2.58  
 Base pKa 2 5.30  
 logP (XH2 2+) -2.38  
 logP (XH +) -3.95  
 logP (neutral X) 1.91

## Sample graphs

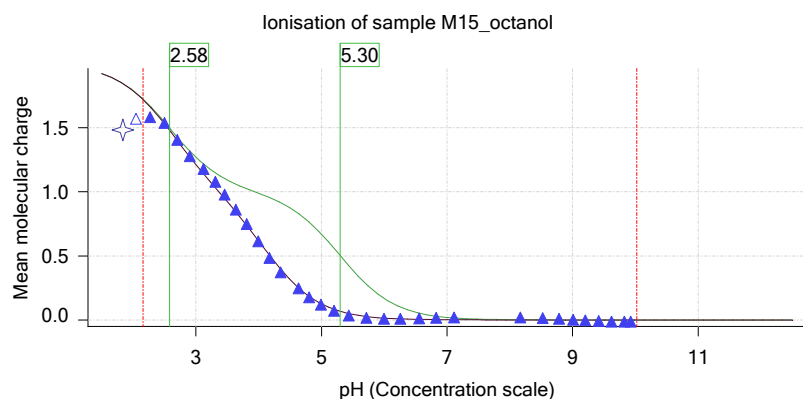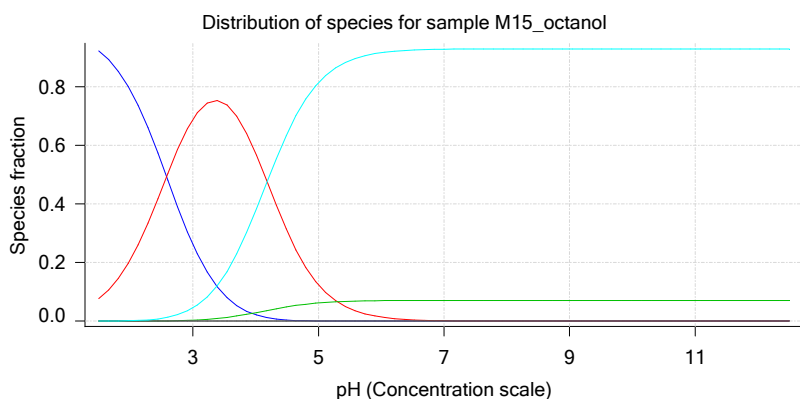

Sample name: **M15\_octanol**  
Assay name: **pH-metric high logP**  
Assay ID: **18B-28002**  
Filename: **C:\Sirius\_T3\Mehtap\20180227\_exp27\_logP\_T3-2\18B-28002\_M15\_octanol\_pH-metric high logP.t3r**

Experiment start time: **2/28/2018 1:10:47 AM**  
Analyst: **Pion**  
Instrument ID: **T312060**

## Sample graphs (continued)

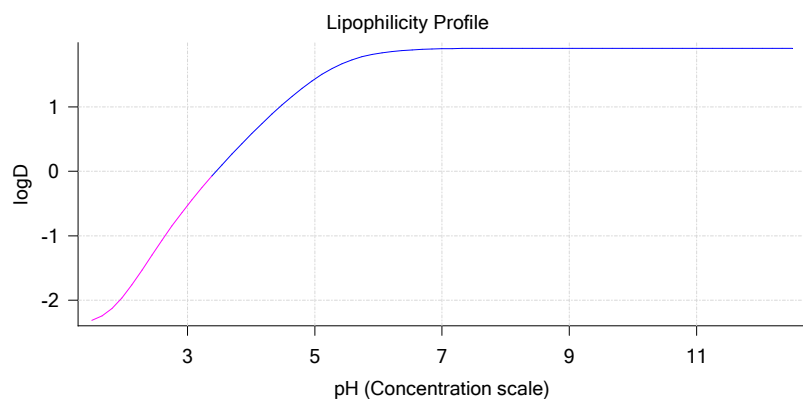

## Sample logD and percent species

| pH     | M15_octanol<br>logD | M15_octanol<br>M15_octanolH2 | M15_octanol<br>M15_octanolH | M15_octanol<br>M15_octanol | M15_octanol<br>M15_octanolH2* | M15_octanol<br>M15_octanolH* | M15_octanol<br>M15_octanol* | Comment       |
|--------|---------------------|------------------------------|-----------------------------|----------------------------|-------------------------------|------------------------------|-----------------------------|---------------|
| 1.000  | -2.38               | 97.37 %                      | 2.56 %                      | 0.00 %                     | 0.07 %                        | 0.00 %                       | 0.00 %                      | Stomach<br>pH |
| 1.200  | -2.37               | 95.93 %                      | 4.00 %                      | 0.00 %                     | 0.06 %                        | 0.00 %                       | 0.00 %                      |               |
| 2.000  | -1.93               | 79.02 %                      | 20.78 %                     | 0.01 %                     | 0.05 %                        | 0.00 %                       | 0.14 %                      |               |
| 3.000  | -0.53               | 26.20 %                      | 68.91 %                     | 0.35 %                     | 0.02 %                        | 0.00 %                       | 4.53 %                      | Blood<br>pH   |
| 4.000  | 0.57                | 2.18 %                       | 57.29 %                     | 2.87 %                     | 0.00 %                        | 0.00 %                       | 37.65 %                     |               |
| 5.000  | 1.43                | 0.05 %                       | 12.38 %                     | 6.21 %                     | 0.00 %                        | 0.00 %                       | 81.37 %                     |               |
| 6.000  | 1.83                | 0.00 %                       | 1.39 %                      | 6.99 %                     | 0.00 %                        | 0.00 %                       | 91.62 %                     |               |
| 6.500  | 1.88                | 0.00 %                       | 0.45 %                      | 7.05 %                     | 0.00 %                        | 0.00 %                       | 92.50 %                     |               |
| 7.000  | 1.90                | 0.00 %                       | 0.14 %                      | 7.08 %                     | 0.00 %                        | 0.00 %                       | 92.78 %                     |               |
| 7.400  | 1.91                | 0.00 %                       | 0.06 %                      | 7.08 %                     | 0.00 %                        | 0.00 %                       | 92.86 %                     |               |
| 8.000  | 1.91                | 0.00 %                       | 0.01 %                      | 7.08 %                     | 0.00 %                        | 0.00 %                       | 92.90 %                     |               |
| 9.000  | 1.91                | 0.00 %                       | 0.00 %                      | 7.09 %                     | 0.00 %                        | 0.00 %                       | 92.91 %                     |               |
| 10.000 | 1.91                | 0.00 %                       | 0.00 %                      | 7.09 %                     | 0.00 %                        | 0.00 %                       | 92.91 %                     |               |
| 11.000 | 1.91                | 0.00 %                       | 0.00 %                      | 7.09 %                     | 0.00 %                        | 0.00 %                       | 92.91 %                     |               |
| 12.000 | 1.91                | 0.00 %                       | 0.00 %                      | 7.09 %                     | 0.00 %                        | 0.00 %                       | 92.91 %                     |               |

## Carbonate and acidity

Carbonate 0.217 mM  
Acidity error 0.167 mM

## Other graphs

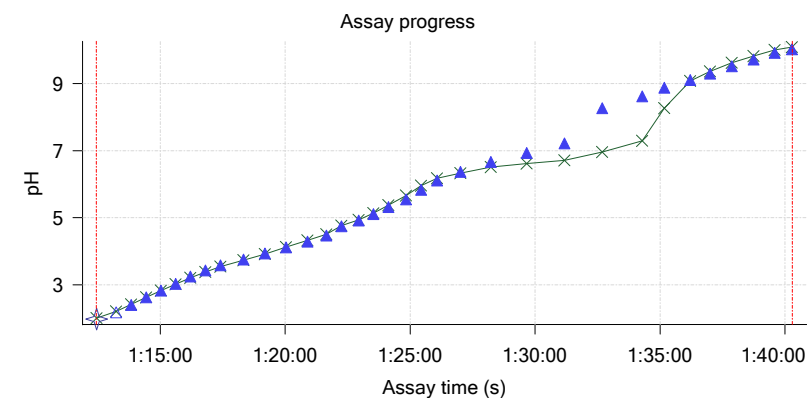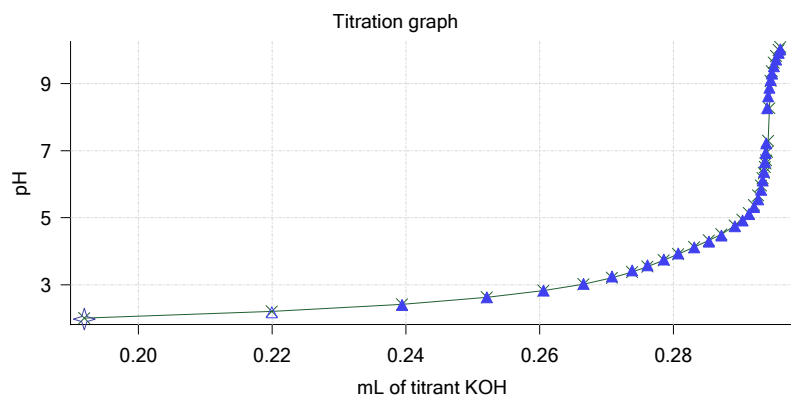

Sample name: **M15\_octanol**  
 Assay name: **pH-metric high logP**  
 Assay ID: **18B-28002**  
 Filename: **C:\Sirius\_T3\Mehtap\20180227\_exp27\_logP\_T3-2\18B-28002\_M15\_octanol\_pH-metric high logP.t3r**

Experiment start time: **2/28/2018 1:10:47 AM**  
 Analyst: **Pion**  
 Instrument ID: **T312060**

## Other graphs (continued)

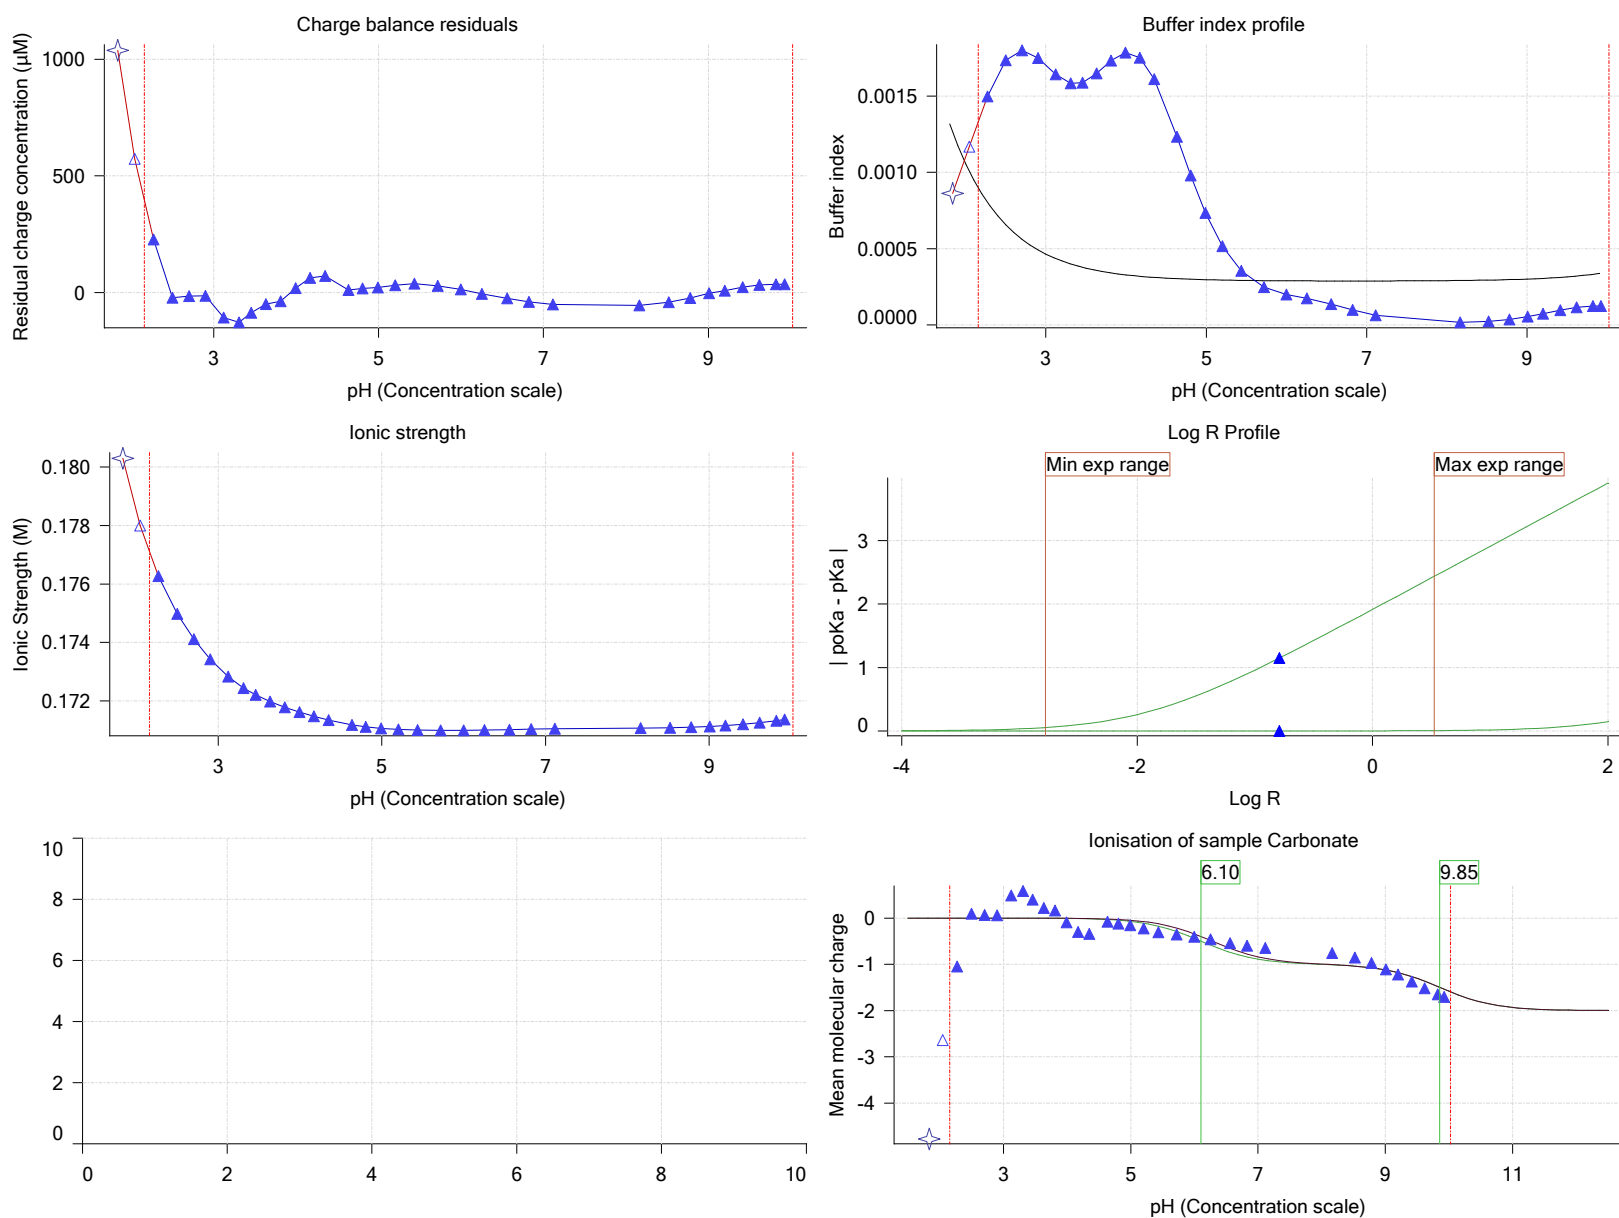

Sample name: **M15\_octanol**  
 Assay name: **pH-metric high logP**  
 Assay ID: **18B-28002**  
 Filename: **C:\Sirius\_T3\Mehtap\20180227\_exp27\_logP\_T3-2\18B-28002\_M15\_octanol\_pH-metric high logP.t3r**

Experiment start time: **2/28/2018 1:10:47 AM**  
 Analyst: **Pion**  
 Instrument ID: **T312060**

## Assay Model

| Settings                          | Value        | Date/Time changed    | Imported from      |
|-----------------------------------|--------------|----------------------|--------------------|
| Sample name                       | M15_octanol  | 2/27/2018 5:03:03 PM | User entered value |
| Sample by                         | Weight       |                      | Default value      |
| Sample weight                     | 0.001780 g   | 2/27/2018 6:41:09 PM | User entered value |
| Formula weight                    | 209.25 g/mol | 2/27/2018 5:03:03 PM | User entered value |
| Solubility                        | Unknown      |                      | Default value      |
| Molecular weight                  | 209.25       | 2/27/2018 5:03:03 PM | User entered value |
| Individual pKa ionic environments | No           |                      | Default value      |
| Number of pKas                    | 2            | 2/27/2018 5:03:03 PM | User entered value |
| Sample is a                       | Base         | 2/27/2018 5:03:03 PM | User entered value |
| pKa 1                             | 2.58         | 2/27/2018 5:03:03 PM | User entered value |
| pKa 2                             | 5.30         | 2/27/2018 5:03:03 PM | User entered value |
| logP (XH2 2+)                     | -2.38        | 2/27/2018 5:03:37 PM | User entered value |
| logp (XH +)                       | -1.38        | 2/27/2018 5:03:29 PM | User entered value |
| logP (neutral X)                  | 1.33         | 2/27/2018 5:03:21 PM | User entered value |

## Events

| Time    | Event             | Water      | Acid       | Base       | Octanol    | pH     | dpH/dt   | pH R-squared | pH SD   | dpH/dt time         |
|---------|-------------------|------------|------------|------------|------------|--------|----------|--------------|---------|---------------------|
| 9:12.2  | Initial pH = 6.77 |            |            |            |            |        |          |              |         |                     |
| 12:12.8 | Data point 1      | 2.20002 mL | 0.09175 mL | 0.00884 mL | 0.05000 mL | 2.005  | -0.01157 | 0.40408      | 0.00090 | 10.0 s              |
| 12:59.2 | Data point 2      | 2.20002 mL | 0.09175 mL | 0.03187 mL | 0.05000 mL | 2.209  | -0.00700 | 0.51322      | 0.00048 | 10.0 s              |
| 13:35.0 | Data point 3      | 2.20002 mL | 0.09175 mL | 0.04760 mL | 0.05000 mL | 2.439  | -0.01430 | 0.68245      | 0.00086 | 10.5 s              |
| 14:11.1 | Data point 4      | 2.20002 mL | 0.09175 mL | 0.05788 mL | 0.05000 mL | 2.658  | -0.01104 | 0.75037      | 0.00063 | 10.0 s              |
| 14:46.7 | Data point 5      | 2.20002 mL | 0.09175 mL | 0.06491 mL | 0.05000 mL | 2.903  | -0.00268 | 0.03532      | 0.00070 | 10.0 s              |
| 15:32.6 | Data point 6      | 2.20002 mL | 0.09175 mL | 0.06976 mL | 0.05000 mL | 3.109  | 0.00003  | 0.00001      | 0.00060 | 10.0 s              |
| 16:08.1 | Data point 7      | 2.20002 mL | 0.09175 mL | 0.07300 mL | 0.05000 mL | 3.347  | -0.00484 | 0.65284      | 0.00030 | 10.0 s              |
| 16:43.6 | Data point 8      | 2.20002 mL | 0.09175 mL | 0.07516 mL | 0.05000 mL | 3.559  | -0.01288 | 0.80904      | 0.00071 | 10.0 s              |
| 17:19.1 | Data point 9      | 2.20002 mL | 0.09175 mL | 0.07669 mL | 0.05000 mL | 3.735  | -0.00362 | 0.61081      | 0.00023 | 10.0 s              |
| 17:54.5 | Data point 10     | 2.20002 mL | 0.09175 mL | 0.07787 mL | 0.05000 mL | 3.912  | -0.00298 | 0.56183      | 0.00020 | 10.0 s              |
| 18:45.5 | Data point 11     | 2.20002 mL | 0.09175 mL | 0.07909 mL | 0.05000 mL | 4.125  | 0.00402  | 0.19132      | 0.00045 | 10.0 s              |
| 19:36.3 | Data point 12     | 2.20002 mL | 0.09175 mL | 0.08008 mL | 0.05000 mL | 4.341  | -0.00621 | 0.78463      | 0.00035 | 10.5 s              |
| 20:12.2 | Data point 13     | 2.20002 mL | 0.09175 mL | 0.08123 mL | 0.05000 mL | 4.581  | -0.01069 | 0.76499      | 0.00060 | 10.0 s              |
| 21:03.2 | Data point 14     | 2.20002 mL | 0.09175 mL | 0.08255 mL | 0.05000 mL | 4.776  | -0.00334 | 0.62508      | 0.00021 | 10.5 s              |
| 21:39.2 | Data point 15     | 2.20002 mL | 0.09175 mL | 0.08429 mL | 0.05000 mL | 5.014  | 0.00455  | 0.39258      | 0.00036 | 10.5 s              |
| 22:25.5 | Data point 16     | 2.20002 mL | 0.09175 mL | 0.08596 mL | 0.05000 mL | 5.200  | -0.00496 | 0.25675      | 0.00048 | 10.0 s              |
| 23:16.5 | Data point 17     | 2.20002 mL | 0.09175 mL | 0.08772 mL | 0.05000 mL | 5.399  | -0.01087 | 0.54074      | 0.00073 | 10.5 s              |
| 23:52.5 | Data point 18     | 2.20002 mL | 0.09175 mL | 0.08958 mL | 0.05000 mL | 5.748  | -0.00304 | 0.04364      | 0.00072 | 10.5 s              |
| 24:38.7 | Data point 19     | 2.20002 mL | 0.09175 mL | 0.09043 mL | 0.05000 mL | 5.958  | -0.00868 | 0.75112      | 0.00049 | 10.0 s              |
| 25:14.1 | Data point 20     | 2.20002 mL | 0.09175 mL | 0.09092 mL | 0.05000 mL | 6.190  | -0.01451 | 0.83075      | 0.00079 | 10.0 s              |
| 25:49.5 | Data point 21     | 2.20002 mL | 0.09175 mL | 0.09125 mL | 0.05000 mL | 6.413  | -0.01920 | 0.95433      | 0.00097 | 10.5 s              |
| 26:35.7 | Data point 22     | 2.20002 mL | 0.09175 mL | 0.09151 mL | 0.05000 mL | 6.612  | -0.01748 | 0.96637      | 0.00088 | 10.5 s              |
| 27:11.6 | Data point 23     | 2.20002 mL | 0.09175 mL | 0.09165 mL | 0.05000 mL | 6.831  | -0.01570 | 0.64440      | 0.00097 | 34.0 s              |
| 28:16.3 | Data point 24     | 2.20002 mL | 0.09175 mL | 0.09177 mL | 0.05000 mL | 7.058  | -0.01716 | 0.88880      | 0.00090 | 35.0 s              |
| 29:21.8 | Data point 25     | 2.20002 mL | 0.09175 mL | 0.09184 mL | 0.05000 mL | 7.282  | -0.01947 | 0.92580      | 0.00100 | 49.5 s              |
| 30:41.9 | Data point 26     | 2.20002 mL | 0.09175 mL | 0.09196 mL | 0.05000 mL | 8.043  | -0.03436 | 0.98140      | 0.00171 | Timed out at 59.5 s |
| 32:17.6 | Data point 27     | 2.20002 mL | 0.09175 mL | 0.09203 mL | 0.05000 mL | 8.319  | -0.01934 | 0.98179      | 0.00096 | 42.5 s              |
| 33:35.8 | Data point 28     | 2.20002 mL | 0.09175 mL | 0.09210 mL | 0.05000 mL | 8.564  | -0.01948 | 0.95892      | 0.00098 | 39.0 s              |
| 34:50.5 | Data point 29     | 2.20002 mL | 0.09175 mL | 0.09219 mL | 0.05000 mL | 8.842  | -0.01977 | 0.97108      | 0.00099 | 21.0 s              |
| 35:42.1 | Data point 30     | 2.20002 mL | 0.09175 mL | 0.09229 mL | 0.05000 mL | 9.067  | -0.01861 | 0.91683      | 0.00096 | 29.0 s              |
| 36:41.7 | Data point 31     | 2.20002 mL | 0.09175 mL | 0.09240 mL | 0.05000 mL | 9.270  | -0.01864 | 0.96902      | 0.00094 | 16.0 s              |
| 37:28.2 | Data point 32     | 2.20002 mL | 0.09175 mL | 0.09259 mL | 0.05000 mL | 9.504  | -0.01908 | 0.97520      | 0.00095 | 14.0 s              |
| 38:23.1 | Data point 33     | 2.20002 mL | 0.09175 mL | 0.09285 mL | 0.05000 mL | 9.705  | -0.01982 | 0.95760      | 0.00100 | 10.5 s              |
| 39:09.4 | Data point 34     | 2.20002 mL | 0.09175 mL | 0.09313 mL | 0.05000 mL | 9.900  | -0.01284 | 0.77555      | 0.00072 | 10.5 s              |
| 39:45.3 | Data point 35     | 2.20002 mL | 0.09175 mL | 0.09337 mL | 0.05000 mL | 10.019 | -0.01383 | 0.93336      | 0.00071 | 10.0 s              |
| 40:51.5 | Data point 36     | 2.20002 mL | 0.19015 mL | 0.09337 mL | 0.15000 mL | 1.966  | -0.01118 | 0.80408      | 0.00062 | 10.0 s              |
| 41:38.0 | Data point 37     | 2.20002 mL | 0.19015 mL | 0.12041 mL | 0.15000 mL | 2.180  | 0.01132  | 0.58782      | 0.00073 | 10.0 s              |

Sample name: **M15\_octanol**  
Assay name: **pH-metric high logP**  
Assay ID: **18B-28002**  
Filename: **C:\Sirius\_T3\Mehtap\20180227\_exp27\_logP\_T3-2\18B-28002\_M15\_octanol\_pH-metric high logP.t3r**

Experiment start time: **2/28/2018 1:10:47 AM**  
Analyst: **Pion**  
Instrument ID: **T312060**

**Events (continued)**

| Time      | Event         | Water      | Acid       | Base       | Octanol    | pH     | dpH/dt   | pH R-squared | pH SD   | dpH/dt time         |
|-----------|---------------|------------|------------|------------|------------|--------|----------|--------------|---------|---------------------|
| 42:13.9   | Data point 38 | 2.20002 mL | 0.19015 mL | 0.13848 mL | 0.15000 mL | 2.397  | -0.00623 | 0.18166      | 0.00072 | 10.0 s              |
| 42:49.6   | Data point 39 | 2.20002 mL | 0.19015 mL | 0.15038 mL | 0.15000 mL | 2.623  | -0.00443 | 0.19218      | 0.00050 | 10.0 s              |
| 43:25.2   | Data point 40 | 2.20002 mL | 0.19015 mL | 0.15830 mL | 0.15000 mL | 2.834  | -0.00869 | 0.46386      | 0.00063 | 10.0 s              |
| 44:00.8   | Data point 41 | 2.20002 mL | 0.19015 mL | 0.16381 mL | 0.15000 mL | 3.045  | 0.00047  | 0.00116      | 0.00068 | 10.0 s              |
| 44:36.3   | Data point 42 | 2.20002 mL | 0.19015 mL | 0.16766 mL | 0.15000 mL | 3.275  | 0.00012  | 0.00005      | 0.00083 | 10.0 s              |
| 45:11.8   | Data point 43 | 2.20002 mL | 0.19015 mL | 0.17027 mL | 0.15000 mL | 3.459  | -0.00226 | 0.43409      | 0.00017 | 10.0 s              |
| 45:47.3   | Data point 44 | 2.20002 mL | 0.19015 mL | 0.17222 mL | 0.15000 mL | 3.620  | -0.01083 | 0.78989      | 0.00060 | 10.0 s              |
| 46:33.1   | Data point 45 | 2.20002 mL | 0.19015 mL | 0.17404 mL | 0.15000 mL | 3.813  | 0.01106  | 0.77170      | 0.00062 | 10.0 s              |
| 47:24.1   | Data point 46 | 2.20002 mL | 0.19015 mL | 0.17568 mL | 0.15000 mL | 4.007  | -0.00395 | 0.53793      | 0.00027 | 10.0 s              |
| 48:15.0   | Data point 47 | 2.20002 mL | 0.19015 mL | 0.17730 mL | 0.15000 mL | 4.193  | -0.00655 | 0.22705      | 0.00068 | 10.0 s              |
| 49:06.0   | Data point 48 | 2.20002 mL | 0.19015 mL | 0.17916 mL | 0.15000 mL | 4.376  | 0.00748  | 0.59754      | 0.00048 | 10.0 s              |
| 49:57.1   | Data point 49 | 2.20002 mL | 0.19015 mL | 0.18123 mL | 0.15000 mL | 4.555  | 0.00753  | 0.36418      | 0.00062 | 10.0 s              |
| 50:42.9   | Data point 50 | 2.20002 mL | 0.19015 mL | 0.18297 mL | 0.15000 mL | 4.737  | -0.00461 | 0.27683      | 0.00043 | 10.0 s              |
| 51:18.3   | Data point 51 | 2.20002 mL | 0.19015 mL | 0.18490 mL | 0.15000 mL | 4.999  | -0.00646 | 0.54035      | 0.00043 | 10.5 s              |
| 51:59.5   | Data point 52 | 2.20002 mL | 0.19015 mL | 0.18610 mL | 0.15000 mL | 5.180  | -0.00205 | 0.01692      | 0.00078 | 10.0 s              |
| 52:45.2   | Data point 53 | 2.20002 mL | 0.19015 mL | 0.18728 mL | 0.15000 mL | 5.395  | 0.00304  | 0.03920      | 0.00076 | 10.0 s              |
| 53:20.6   | Data point 54 | 2.20002 mL | 0.19015 mL | 0.18808 mL | 0.15000 mL | 5.608  | -0.01570 | 0.82199      | 0.00086 | 11.0 s              |
| 53:57.1   | Data point 55 | 2.20002 mL | 0.19015 mL | 0.18869 mL | 0.15000 mL | 5.827  | -0.01657 | 0.86910      | 0.00088 | 10.5 s              |
| 54:33.0   | Data point 56 | 2.20002 mL | 0.19015 mL | 0.18914 mL | 0.15000 mL | 6.061  | -0.01364 | 0.47158      | 0.00098 | 11.5 s              |
| 55:09.9   | Data point 57 | 2.20002 mL | 0.19015 mL | 0.18944 mL | 0.15000 mL | 6.322  | -0.01837 | 0.84621      | 0.00099 | 16.0 s              |
| 55:56.4   | Data point 58 | 2.20002 mL | 0.19015 mL | 0.18965 mL | 0.15000 mL | 6.525  | -0.01620 | 0.78360      | 0.00090 | 15.0 s              |
| 56:42.0   | Data point 59 | 2.20002 mL | 0.19015 mL | 0.18979 mL | 0.15000 mL | 6.710  | -0.01910 | 0.93669      | 0.00097 | 31.0 s              |
| 57:38.4   | Data point 60 | 2.20002 mL | 0.19015 mL | 0.18989 mL | 0.15000 mL | 7.095  | -0.01967 | 0.99319      | 0.00097 | 59.0 s              |
| 59:08.1   | Data point 61 | 2.20002 mL | 0.19015 mL | 0.18998 mL | 0.15000 mL | 7.531  | -0.03741 | 0.97375      | 0.00187 | Timed out at 59.5 s |
| 1:00:33.4 | Data point 62 | 2.20002 mL | 0.19015 mL | 0.19001 mL | 0.15000 mL | 7.625  | -0.01967 | 0.98081      | 0.00098 | 53.5 s              |
| 1:02:02.7 | Data point 63 | 2.20002 mL | 0.19015 mL | 0.19007 mL | 0.15000 mL | 8.014  | -0.01881 | 0.97922      | 0.00094 | 58.0 s              |
| 1:03:36.4 | Data point 64 | 2.20002 mL | 0.19015 mL | 0.19015 mL | 0.15000 mL | 8.332  | -0.01820 | 0.91738      | 0.00094 | 45.0 s              |
| 1:05:02.3 | Data point 65 | 2.20002 mL | 0.19015 mL | 0.19024 mL | 0.15000 mL | 8.633  | -0.01854 | 0.84927      | 0.00099 | 18.0 s              |
| 1:06:01.1 | Data point 66 | 2.20002 mL | 0.19015 mL | 0.19038 mL | 0.15000 mL | 8.886  | -0.01878 | 0.92878      | 0.00096 | 21.5 s              |
| 1:07:03.5 | Data point 67 | 2.20002 mL | 0.19015 mL | 0.19052 mL | 0.15000 mL | 9.109  | -0.01850 | 0.95816      | 0.00093 | 15.0 s              |
| 1:07:54.1 | Data point 68 | 2.20002 mL | 0.19015 mL | 0.19069 mL | 0.15000 mL | 9.310  | -0.01772 | 0.81325      | 0.00097 | 10.5 s              |
| 1:08:45.4 | Data point 69 | 2.20002 mL | 0.19015 mL | 0.19095 mL | 0.15000 mL | 9.509  | -0.01583 | 0.65574      | 0.00097 | 17.0 s              |
| 1:09:33.1 | Data point 70 | 2.20002 mL | 0.19015 mL | 0.19130 mL | 0.15000 mL | 9.756  | -0.01460 | 0.55168      | 0.00097 | 16.5 s              |
| 1:10:30.5 | Data point 71 | 2.20002 mL | 0.19015 mL | 0.19172 mL | 0.15000 mL | 9.948  | -0.00681 | 0.21656      | 0.00072 | 10.0 s              |
| 1:11:11.1 | Data point 72 | 2.20002 mL | 0.19015 mL | 0.19191 mL | 0.15000 mL | 10.017 | 0.00087  | 0.01530      | 0.00035 | 10.0 s              |
| 1:12:27.4 | Data point 73 | 2.20002 mL | 0.29403 mL | 0.19191 mL | 0.45000 mL | 1.972  | -0.01003 | 0.70683      | 0.00059 | 10.0 s              |
| 1:13:13.9 | Data point 74 | 2.20002 mL | 0.29403 mL | 0.21997 mL | 0.45000 mL | 2.175  | 0.00579  | 0.71483      | 0.00034 | 10.5 s              |
| 1:13:50.3 | Data point 75 | 2.20002 mL | 0.29403 mL | 0.23942 mL | 0.45000 mL | 2.398  | -0.00050 | 0.00121      | 0.00071 | 10.0 s              |
| 1:14:26.0 | Data point 76 | 2.20002 mL | 0.29403 mL | 0.25212 mL | 0.45000 mL | 2.626  | -0.01002 | 0.42775      | 0.00076 | 10.0 s              |
| 1:15:01.6 | Data point 77 | 2.20002 mL | 0.29403 mL | 0.26056 mL | 0.45000 mL | 2.826  | -0.00389 | 0.08255      | 0.00067 | 10.0 s              |
| 1:15:37.2 | Data point 78 | 2.20002 mL | 0.29403 mL | 0.26653 mL | 0.45000 mL | 3.025  | 0.01417  | 0.79174      | 0.00079 | 10.0 s              |
| 1:16:12.6 | Data point 79 | 2.20002 mL | 0.29403 mL | 0.27081 mL | 0.45000 mL | 3.243  | 0.00428  | 0.28164      | 0.00040 | 10.0 s              |
| 1:16:48.2 | Data point 80 | 2.20002 mL | 0.29403 mL | 0.27382 mL | 0.45000 mL | 3.430  | 0.00870  | 0.54657      | 0.00058 | 10.5 s              |
| 1:17:24.2 | Data point 81 | 2.20002 mL | 0.29403 mL | 0.27613 mL | 0.45000 mL | 3.577  | -0.01656 | 0.72331      | 0.00096 | 15.0 s              |
| 1:18:20.2 | Data point 82 | 2.20002 mL | 0.29403 mL | 0.27858 mL | 0.45000 mL | 3.754  | 0.00239  | 0.04126      | 0.00058 | 10.0 s              |
| 1:19:11.2 | Data point 83 | 2.20002 mL | 0.29403 mL | 0.28074 mL | 0.45000 mL | 3.931  | -0.00851 | 0.21217      | 0.00091 | 10.0 s              |
| 1:20:02.2 | Data point 84 | 2.20002 mL | 0.29403 mL | 0.28311 mL | 0.45000 mL | 4.112  | 0.00633  | 0.50236      | 0.00044 | 10.0 s              |
| 1:20:53.2 | Data point 85 | 2.20002 mL | 0.29403 mL | 0.28530 mL | 0.45000 mL | 4.288  | 0.00616  | 0.42147      | 0.00047 | 10.0 s              |
| 1:21:39.1 | Data point 86 | 2.20002 mL | 0.29403 mL | 0.28716 mL | 0.45000 mL | 4.468  | 0.00653  | 0.41686      | 0.00050 | 10.5 s              |
| 1:22:15.1 | Data point 87 | 2.20002 mL | 0.29403 mL | 0.28920 mL | 0.45000 mL | 4.750  | -0.01024 | 0.56608      | 0.00067 | 10.5 s              |
| 1:22:56.2 | Data point 88 | 2.20002 mL | 0.29403 mL | 0.29033 mL | 0.45000 mL | 4.921  | -0.00504 | 0.30494      | 0.00045 | 10.5 s              |
| 1:23:32.1 | Data point 89 | 2.20002 mL | 0.29403 mL | 0.29128 mL | 0.45000 mL | 5.107  | -0.00661 | 0.13487      | 0.00089 | 10.0 s              |
| 1:24:07.6 | Data point 90 | 2.20002 mL | 0.29403 mL | 0.29207 mL | 0.45000 mL | 5.317  | -0.00338 | 0.02804      | 0.00100 | 17.0 s              |
| 1:24:50.0 | Data point 91 | 2.20002 mL | 0.29403 mL | 0.29269 mL | 0.45000 mL | 5.549  | -0.00970 | 0.38066      | 0.00078 | 11.0 s              |
| 1:25:26.4 | Data point 92 | 2.20002 mL | 0.29403 mL | 0.29311 mL | 0.45000 mL | 5.831  | -0.01048 | 0.30330      | 0.00094 | 12.5 s              |
| 1:26:04.3 | Data point 93 | 2.20002 mL | 0.29403 mL | 0.29337 mL | 0.45000 mL | 6.110  | -0.01816 | 0.86837      | 0.00096 | 31.0 s              |

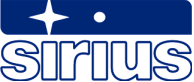

## Assay Events

Sample name: **M15\_octanol** Experiment start time: **2/28/2018 1:10:47 AM**  
Assay name: **pH-metric high logP** Analyst: **Pion**  
Assay ID: **18B-28002** Instrument ID: **T312060**  
Filename: **C:\Sirius\_T3\Mehtap\20180227\_exp27\_logP\_T3-2\18B-28002\_M15\_octanol\_pH-metric high logP.t3r**

## Events (continued)

| Time      | Event          | Water      | Acid       | Base       | Octanol    | pH     | dpH/dt   | pH R-squared | pH SD   | dpH/dt time         |
|-----------|----------------|------------|------------|------------|------------|--------|----------|--------------|---------|---------------------|
| 1:27:00.8 | Data point 94  | 2.20002 mL | 0.29403 mL | 0.29353 mL | 0.45000 mL | 6.366  | -0.01843 | 0.94543      | 0.00094 | 42.0 s              |
| 1:28:13.4 | Data point 95  | 2.20002 mL | 0.29403 mL | 0.29370 mL | 0.45000 mL | 6.669  | -0.01870 | 0.98301      | 0.00093 | 56.0 s              |
| 1:29:40.0 | Data point 96  | 2.20002 mL | 0.29403 mL | 0.29379 mL | 0.45000 mL | 6.935  | -0.02391 | 0.96793      | 0.00120 | Timed out at 59.5 s |
| 1:31:10.7 | Data point 97  | 2.20002 mL | 0.29403 mL | 0.29386 mL | 0.45000 mL | 7.222  | -0.03766 | 0.98462      | 0.00187 | Timed out at 59.5 s |
| 1:32:41.3 | Data point 98  | 2.20002 mL | 0.29403 mL | 0.29403 mL | 0.45000 mL | 8.270  | -0.03076 | 0.99007      | 0.00153 | Timed out at 59.5 s |
| 1:34:16.9 | Data point 99  | 2.20002 mL | 0.29403 mL | 0.29417 mL | 0.45000 mL | 8.626  | -0.01455 | 0.55806      | 0.00096 | 17.5 s              |
| 1:35:10.1 | Data point 100 | 2.20002 mL | 0.29403 mL | 0.29433 mL | 0.45000 mL | 8.885  | 0.00677  | 0.11530      | 0.00099 | 21.5 s              |
| 1:36:12.4 | Data point 101 | 2.20002 mL | 0.29403 mL | 0.29454 mL | 0.45000 mL | 9.111  | -0.00911 | 0.28833      | 0.00084 | 11.5 s              |
| 1:36:59.8 | Data point 102 | 2.20002 mL | 0.29403 mL | 0.29473 mL | 0.45000 mL | 9.302  | -0.01144 | 0.38459      | 0.00091 | 12.0 s              |
| 1:37:52.6 | Data point 103 | 2.20002 mL | 0.29403 mL | 0.29501 mL | 0.45000 mL | 9.516  | -0.01706 | 0.74556      | 0.00098 | 11.0 s              |
| 1:38:44.4 | Data point 104 | 2.20002 mL | 0.29403 mL | 0.29534 mL | 0.45000 mL | 9.718  | -0.01826 | 0.87768      | 0.00096 | 10.0 s              |
| 1:39:35.4 | Data point 105 | 2.20002 mL | 0.29403 mL | 0.29574 mL | 0.45000 mL | 9.922  | -0.00385 | 0.15864      | 0.00048 | 10.5 s              |
| 1:40:16.4 | Data point 106 | 2.20002 mL | 0.29403 mL | 0.29598 mL | 0.45000 mL | 10.023 | -0.00776 | 0.63643      | 0.00048 | 10.5 s              |
| 1:40:36.1 | Assay volumes  | 2.20002 mL | 0.29403 mL | 0.29598 mL | 0.45000 mL |        |          |              |         |                     |



Sample name: **M15\_octanol**  
 Assay name: **pH-metric high logP**  
 Assay ID: **18B-28002**  
 Filename: **C:\Sirius\_T3\Mehtap\20180227\_exp27\_logP\_T3-2\18B-28002\_M15\_octanol\_pH-metric high logP.t3r**

Experiment start time: **2/28/2018 1:10:47 AM**  
 Analyst: **Pion**  
 Instrument ID: **T312060**

## Assay Settings

| Setting                             | Value              | Original Value | Date/Time changed | Imported from |
|-------------------------------------|--------------------|----------------|-------------------|---------------|
| <b>General Settings</b>             |                    |                |                   |               |
| Analyst name                        | Pion               |                |                   |               |
| <b>Standard Experiment Settings</b> |                    |                |                   |               |
| Number of titrations                | 3                  |                |                   |               |
| Minimum pH                          | 2.000              |                |                   |               |
| Maximum pH                          | 10.000             |                |                   |               |
| pH step between points of           | 0.200              |                |                   |               |
| Minimum titrant addition            | 0.00002 mL         |                |                   |               |
| Maximum titrant addition            | 0.10000 mL         |                |                   |               |
| Argon flow rate                     | 100%               |                |                   |               |
| Start titration using               | Cautious pH adjust |                |                   |               |
| <b>Advanced General Settings</b>    |                    |                |                   |               |
| Detect turbidity using              | None               |                |                   |               |
| Collect turbidity sensor data       | No                 |                |                   |               |
| Collect UV spectra                  | No                 |                |                   |               |
| Stir after titrant addition for     | 5 seconds          |                |                   |               |
| For titrant addition, stir at       | 10%                |                |                   |               |
| <b>Titration Pre-Dose</b>           |                    |                |                   |               |
| Titration pre-dose                  | None               |                |                   |               |
| <b>Assay Medium</b>                 |                    |                |                   |               |
| ISA water volume                    | 2.20 mL            |                |                   |               |
| Water added                         | Automatic          |                |                   |               |
| Partition solvent type              | Octanol            |                |                   |               |
| Partition volume                    | 0.050 mL           |                |                   |               |
| Partition solvent added             | Automatic          |                |                   |               |
| After partition addition, stir for  | 1 seconds          |                |                   |               |
| <b>Sample Sonication</b>            |                    |                |                   |               |
| Sonicate                            | Yes                |                |                   |               |
| Adjust pH for sonication            | No                 |                |                   |               |
| Sonicate for                        | 300 seconds        |                |                   |               |
| After sonication stir for           | 5 seconds          |                |                   |               |
| <b>Sample Dissolution</b>           |                    |                |                   |               |
| Perform a dissolution stage         | Yes                |                |                   |               |
| Adjust and hold pH for dissolution  | To start pH        |                |                   |               |
| Stir to dissolve for                | 120 seconds        |                |                   |               |
| For dissolution, stir at            | 10%                |                |                   |               |
| <b>Carbonate purge</b>              |                    |                |                   |               |
| Perform a carbonate purge           | No                 |                |                   |               |
| <b>Temperature Control</b>          |                    |                |                   |               |
| Wait for temperature                | Yes                |                |                   |               |
| Required start temperature          | 25.0°C             |                |                   |               |
| Acceptable deviation                | 0.5°C              |                |                   |               |
| Time to wait                        | 60 seconds         |                |                   |               |
| Stir speed of                       | 50%                |                |                   |               |
| <b>Titration 1</b>                  |                    |                |                   |               |
| Titrate from                        | Low to high pH     |                |                   |               |
| Adjust to start pH                  | Yes                |                |                   |               |
| After pH adjust stir for            | 30 seconds         |                |                   |               |
| Stir to allow partitioning for      | 15 seconds         |                |                   |               |
| Stirrer speed for partitioning      | 50%                |                |                   |               |
| <b>Titration 2</b>                  |                    |                |                   |               |
| Titrate from                        | Low to high pH     |                |                   |               |
| Add additional water                | 0.00 mL            |                |                   |               |
| Additional partition solvent volume | 0.100 mL           |                |                   |               |
| Additional partition solvent added  | Automatic          |                |                   |               |
| After pH adjust stir for            | 30 seconds         |                |                   |               |
| Stir to allow partitioning for      | 15 seconds         |                |                   |               |
| Stirrer speed for partitioning      | 55%                |                |                   |               |



Sample name: **M15\_octanol**  
 Assay name: **pH-metric high logP**  
 Assay ID: **18B-28002**  
 Filename: **C:\Sirius\_T3\Mehtap\20180227\_exp27\_logP\_T3-2\18B-28002\_M15\_octanol\_pH-metric high logP.t3r**

Experiment start time: **2/28/2018 1:10:47 AM**  
 Analyst: **Pion**  
 Instrument ID: **T312060**

## Assay Settings (continued)

| Setting                             | Value          | Original Value | Date/Time changed | Imported from |
|-------------------------------------|----------------|----------------|-------------------|---------------|
| <b>Titration 3</b>                  |                |                |                   |               |
| Titrate from                        | Low to high pH |                |                   |               |
| Add additional water                | 0.00 mL        |                |                   |               |
| Additional partition solvent volume | 0.300 mL       |                |                   |               |
| Additional partition solvent added  | Automatic      |                |                   |               |
| After pH adjust stir for            | 30 seconds     |                |                   |               |
| Stir to allow partitioning for      | 15 seconds     |                |                   |               |
| Stirrer speed for partitioning      | 60%            |                |                   |               |
| <b>Data Point Stability</b>         |                |                |                   |               |
| Stir during data point collection   | No             |                |                   |               |
| Delay before data point collection  | 0 seconds      |                |                   |               |
| Number of points to average         | 20 points      |                |                   |               |
| Time interval between points        | 0.50 seconds   |                |                   |               |
| Required maximum standard deviation | 0.00100 dpH/dt |                |                   |               |
| Stability timeout after             | 60 seconds     |                |                   |               |

## Calibration Settings

| Setting                   | Value  | Date/Time changed    | Imported from             |
|---------------------------|--------|----------------------|---------------------------|
| Four-Plus alpha           | 0.130  | 2/28/2018 1:10:47 AM | C:\Sirius_T3\HCl18B27.t3r |
| Four-Plus S               | 0.9970 | 2/28/2018 1:10:47 AM | C:\Sirius_T3\HCl18B27.t3r |
| Four-Plus jH              | 0.8    | 2/28/2018 1:10:47 AM | C:\Sirius_T3\HCl18B27.t3r |
| Four-Plus jOH             | -0.4   | 2/28/2018 1:10:47 AM | C:\Sirius_T3\HCl18B27.t3r |
| Base concentration factor | 1.000  | 2/28/2018 1:10:47 AM | C:\Sirius_T3\KOH18B27.t3r |
| Acid concentration factor | 0.994  | 2/28/2018 1:10:47 AM | C:\Sirius_T3\HCl18B27.t3r |

## Instrument Settings

| Setting              | Value                      | Batch Id    | Install date           |
|----------------------|----------------------------|-------------|------------------------|
| Instrument owner     | Merck                      |             |                        |
| Instrument ID        | T312060                    |             |                        |
| Instrument type      | T3 Simulator               |             |                        |
| Software version     | 1.1.3.0                    |             |                        |
| Dispenser module     |                            | T3DM1200361 | 3/31/2009 5:24:52 AM   |
| Dispenser 0          | Water                      |             | 3/31/2009 5:25:05 AM   |
| Syringe volume       | 2.5 mL                     |             |                        |
| Firmware version     | 1.2.1(r2)                  |             |                        |
| Titrant              | Water (0.15 M KCl)         | 02-06-2018  | 2/27/2018 10:05:59 AM  |
| Dispenser 2          | Acid                       |             | 3/31/2009 5:25:11 AM   |
| Syringe volume       | 0.5 mL                     |             |                        |
| Firmware version     | 1.2.1(r2)                  |             |                        |
| Titrant              | Acid (0.5 M HCl)           | 02-27-2018  | 2/27/2018 10:27:22 AM  |
| Dispenser 1          | Base                       |             | 3/31/2009 5:25:21 AM   |
| Syringe volume       | 0.5 mL                     |             |                        |
| Firmware version     | 1.2.1(r2)                  |             |                        |
| Titrant              | Base (0.5 M KOH)           | 9/22/2017   | 2/27/2018 10:21:22 AM  |
| Dispenser 5          | Cosolvent                  |             | 3/31/2009 5:26:24 AM   |
| Syringe volume       | 2.5 mL                     |             |                        |
| Firmware version     | 1.2.1(r2)                  |             |                        |
| Distribution valve 5 | Distribution Valve         |             | 3/31/2009 5:28:19 AM   |
| Firmware version     | 1.1.3                      |             |                        |
| Port A               | Methanol (80%, 0.15 M KCl) | 09-26-17    | 2/7/2018 9:42:01 AM    |
| Port B               | Cyclohexane                | 11-01-17    | 2/27/2018 10:37:57 AM  |
| Dispenser 3          | Buffer                     |             | 8/3/2010 5:05:16 AM    |
| Syringe volume       | 0.5 mL                     |             |                        |
| Firmware version     | 1.2.1(r2)                  |             |                        |
| Titrant              | Dodecane                   | 2018/01/31  | 1/31/2018 12:26:26 PM  |
| Dispenser 6          | Octanol                    |             | 10/22/2010 10:52:43 AM |

Sample name: **M15\_octanol**  
 Assay name: **pH-metric high logP**  
 Assay ID: **18B-28002**  
 Filename: **C:\Sirius\_T3\Mehtap\20180227\_exp27\_logP\_T3-2\18B-28002\_M15\_octanol\_pH-metric high logP.t3r**

Experiment start time: **2/28/2018 1:10:47 AM**  
 Analyst: **Pion**  
 Instrument ID: **T312060**

## Instrument Settings (continued)

| Setting                                   | Value                      | Batch Id    | Install date           |
|-------------------------------------------|----------------------------|-------------|------------------------|
| Syringe volume                            | 0.5 mL                     |             |                        |
| Firmware version                          | 1.2.1(r2)                  |             |                        |
| Titrant                                   | Octanol                    | 01-31-2018  | 2/27/2018 9:59:35 AM   |
| Titration                                 |                            | T3TM1200161 | 3/31/2009 5:24:17 AM   |
| Horizontal axis firmware version          | 1.17 AI1DI2DO2 Stepper 2   |             |                        |
| Vertical axis firmware version            | 1.17 AI1DI2DO2 Stepper 2   |             |                        |
| Chassis I/O firmware version              | 1.11 AI1DI0DO4 Norgren I/O |             |                        |
| Probe I/O firmware version                | 1.1.1                      |             |                        |
| Electrode                                 | T3 Electrode               | T3E0923     | 1/23/2018 2:01:00 PM   |
| E0 calibration                            | +2.60 mV                   |             | 2/28/2018 1:11:15 AM   |
| Filling solution                          | 3M KCl                     | KCL097      | 2/27/2018 9:49:43 AM   |
| Liquids                                   |                            |             |                        |
| Wash 1                                    | 50% IPA:50% Water          |             | 2/27/2018 9:49:58 AM   |
| Wash 2                                    | 0.5% Triton X-100 in H2O   |             | 2/27/2018 9:50:01 AM   |
| Buffer position 1                         | pH7 Wash                   |             | 2/27/2018 9:50:04 AM   |
| Buffer position 2                         | pH 7                       |             | 2/27/2018 9:50:06 AM   |
| Storage position                          |                            |             | 2/27/2018 9:55:12 AM   |
| Wash water                                | 9.1e+003 mL                | 02-27-2018  | 2/27/2018 9:54:39 AM   |
| Waste                                     | 6.3e+003 mL                |             | 11/28/2017 10:36:29 AM |
| Temperature controller                    |                            |             | 8/5/2010 6:35:13 AM    |
| Turbidity detector                        |                            |             | 3/31/2009 5:24:45 AM   |
| Spectrometer                              |                            | 074811      | 11/23/2010 11:22:28 AM |
| Dip probe                                 |                            | 10196       |                        |
| Wavelength coefficient A0                 | 183.333                    |             |                        |
| Wavelength coefficient A1                 | 2.21568                    |             |                        |
| Wavelength coefficient A2                 | -0.000289308               |             |                        |
| Total lamp lit time                       | 110:52:56                  |             | 11/23/2010 11:22:28 AM |
| Calibrated on                             | 2/27/2018 10:40:38 AM      |             |                        |
| Integration time                          | 40                         |             |                        |
| Scans averaged                            | 10                         |             |                        |
| Autoloader                                |                            | T3AL1200345 | 11/10/2015 9:34:13 AM  |
| Left-right axis firmware version          | 1.17 AI1DI2DO2 Stepper 2   |             |                        |
| Front-back axis firmware version          | 1.17 AI1DI2DO2 Stepper 2   |             |                        |
| Vertical axis firmware version            | 1.17 AI1DI2DO2 Stepper 2   |             |                        |
| Chassis I/O firmware version              | 1.11 AI1DI0DO4 Norgren I/O |             |                        |
| Configuration                             |                            |             |                        |
| Alternate titration position              | Titration position         |             |                        |
| Alternate reference position              | Reference position         |             |                        |
| Maximum standard vial volume              | 3.50 mL                    |             |                        |
| Maximum alternate vial volume             | 25.00 mL                   |             |                        |
| Automatic action idle period              | 5 minute(s)                |             |                        |
| Titration tube volume                     | 1.3 mL                     |             |                        |
| Syringe flush count                       | 3.50                       |             |                        |
| Flowing wash pump volume                  | 20.0 mL                    |             |                        |
| Flowing wash stir duration                | 5 s                        |             |                        |
| Flowing wash stir speed                   | 30%                        |             |                        |
| Solvent wash stir duration                | 5 s                        |             |                        |
| Solvent wash stir speed                   | 30%                        |             |                        |
| Surfactant wash stir duration             | 5 s                        |             |                        |
| Surfactant wash stir speed                | 30%                        |             |                        |
| E0 calibration minimum number of points   | 10                         |             |                        |
| E0 calibration maximum standard deviation | 0.01500                    |             |                        |
| E0 calibration timeout period             | 60 s                       |             |                        |
| E0 calibration stir duration              | 5 s                        |             |                        |
| E0 calibration preparation stir speed     | 30%                        |             |                        |
| E0 calibration buffer wash stir duration  | 5 s                        |             |                        |
| E0 calibration buffer wash stir speed     | 30%                        |             |                        |
| E0 calibration reading stir speed         | 0%                         |             |                        |

Sample name: **M15\_octanol** Experiment start time: **2/28/2018 1:10:47 AM**  
 Assay name: **pH-metric high logP** Analyst: **Pion**  
 Assay ID: **18B-28002** Instrument ID: **T312060**  
 Filename: **C:\Sirius\_T3\Mehtap\20180227\_exp27\_logP\_T3-2\18B-28002\_M15\_octanol\_pH-metric high logP.t3r**

## Instrument Settings (continued)

| Setting                                     | Value   | Batch Id | Install date |
|---------------------------------------------|---------|----------|--------------|
| Spectrometer calibration stir duration      | 5 s     |          |              |
| Spectrometer calibration stir speed         | 30%     |          |              |
| Spectrometer calibration wash pump volume   | 20.0 mL |          |              |
| Spectrometer calibration wash stir duration | 5 s     |          |              |
| Spectrometer calibration wash stir speed    | 30%     |          |              |
| Overhead dispense height                    | 10000   |          |              |

## Refinement Settings

| Setting                        | Value    | Default value |
|--------------------------------|----------|---------------|
| Turbidity detection method     | None     | None          |
| Turbidity wavelength to assess | 500.0 nm | 500.0 nm      |
| Turbidity maximum absorbance   | 0.100    | 0.100         |
| Turbidity probe threshold      | 50.00    | 50.00         |

## Experiment Log

[2:37] Air gap created for Water (0.15 M KCl)  
 [2:37] Air gap created for Acid (0.5 M HCl)  
 [2:38] Air gap created for Base (0.5 M KOH)  
 [2:38] Air gap released for Water (0.15 M KCl)  
 [2:42] Titrator arm moved over Titration position  
 [2:42] Titration 1 of 3  
 [2:42] Adding initial titrants  
 [2:42] Automatically add 2.20000 mL of water  
 [3:19] Dispensed 2.200024 mL of Water (0.15 M KCl)  
 [3:23] Titrator arm moved over Drain  
 [9:05] Titrator arm moved to Titration position  
 [9:05] Argon flow rate set to 100  
 [9:05] Stirrer speed set to 10  
 [9:10] Automatically add 0.05000 mL of Octanol  
 [9:11] Dispensed 0.050000 mL of Octanol  
 [9:12] Initial pH = 6.77  
 [9:12] Iterative adjust 6.77 -> 2.00  
 [9:12] pH 6.77 -> 2.00  
 [9:15] Air gap released for Acid (0.5 M HCl)  
 [9:15] Dispensed 0.091745 mL of Acid (0.5 M HCl)  
 [9:21] Holding pH 2.00  
 [11:21] Stirrer speed set to 0  
 [11:21] Stirrer speed set to 50  
 [11:21] Iterative adjust 1.95 -> 2.00  
 [11:21] pH 1.95 -> 2.00  
 [11:21] Air gap released for Base (0.5 M KOH)  
 [11:22] Dispensed 0.008843 mL of Base (0.5 M KOH)  
 [12:13] Stirrer speed set to 0  
 [12:23] Datapoint id 1 collected  
 [12:23] Stirrer speed set to 50  
 [12:28] pH 2.01 -> 2.21  
 [12:28] Using cautious pH adjust  
 [12:28] Dispensed 0.012112 mL of Base (0.5 M KOH)  
 [12:33] Stepping pH = 2.10  
 [12:34] Dispensed 0.008631 mL of Base (0.5 M KOH)  
 [12:39] Stepping pH = 2.18  
 [12:39] Dispensed 0.002281 mL of Base (0.5 M KOH)  
 [12:44] Stepping pH = 2.21  
 [12:59] Stirrer speed set to 0  
 [13:09] Datapoint id 2 collected  
 [13:09] Charge balance equation is out by 4.9%  
 [13:09] Stirrer speed set to 50

Sample name: **M15\_octanol**  
Assay name: **pH-metric high logP**  
Assay ID: **18B-28002**  
Filename: **C:\Sirius\_T3\Mehtap\20180227\_exp27\_logP\_T3-2\18B-28002\_M15\_octanol\_pH-metric high logP.t3r**

Experiment start time: **2/28/2018 1:10:47 AM**  
Analyst: **Pion**  
Instrument ID: **T312060**

## Experiment Log (continued)

[13:14] pH 2.22 -> 2.42  
[13:14] Using charge balance adjust  
[13:15] Dispensed 0.015734 mL of Base (0.5 M KOH)  
[13:35] Stirrer speed set to 0  
[13:45] Datapoint id 3 collected  
[13:45] Charge balance equation is out by 9.6%  
[13:45] Stirrer speed set to 50  
[13:50] pH 2.44 -> 2.64  
[13:50] Using charge balance adjust  
[13:51] Dispensed 0.010278 mL of Base (0.5 M KOH)  
[14:11] Stirrer speed set to 0  
[14:21] Datapoint id 4 collected  
[14:21] Charge balance equation is out by 6.7%  
[14:21] Stirrer speed set to 50  
[14:26] pH 2.66 -> 2.86  
[14:26] Using charge balance adjust  
[14:26] Dispensed 0.007032 mL of Base (0.5 M KOH)  
[14:47] Stirrer speed set to 0  
[14:57] Datapoint id 5 collected  
[14:57] Charge balance equation is out by 19.7%  
[14:57] Stirrer speed set to 50  
[15:02] pH 2.91 -> 3.11  
[15:02] Using cautious pH adjust  
[15:02] Dispensed 0.002305 mL of Base (0.5 M KOH)  
[15:07] Stepping pH = 2.99  
[15:07] Dispensed 0.002023 mL of Base (0.5 M KOH)  
[15:12] Stepping pH = 3.08  
[15:12] Dispensed 0.000517 mL of Base (0.5 M KOH)  
[15:17] Stepping pH = 3.11  
[15:32] Stirrer speed set to 0  
[15:42] Datapoint id 6 collected  
[15:42] Charge balance equation is out by -4.8%  
[15:42] Stirrer speed set to 50  
[15:48] pH 3.12 -> 3.32  
[15:48] Using charge balance adjust  
[15:48] Dispensed 0.003246 mL of Base (0.5 M KOH)  
[16:08] Stirrer speed set to 0  
[16:18] Datapoint id 7 collected  
[16:18] Charge balance equation is out by 13.6%  
[16:18] Stirrer speed set to 50  
[16:23] pH 3.35 -> 3.55  
[16:23] Using charge balance adjust  
[16:23] Dispensed 0.002164 mL of Base (0.5 M KOH)  
[16:43] Stirrer speed set to 0  
[16:53] Datapoint id 8 collected  
[16:53] Charge balance equation is out by 3.6%  
[16:53] Stirrer speed set to 50  
[16:59] pH 3.56 -> 3.76  
[16:59] Using charge balance adjust  
[16:59] Dispensed 0.001529 mL of Base (0.5 M KOH)  
[17:19] Stirrer speed set to 0  
[17:29] Datapoint id 9 collected  
[17:29] Charge balance equation is out by -14.3%  
[17:29] Stirrer speed set to 50  
[17:34] pH 3.75 -> 3.95  
[17:34] Using charge balance adjust  
[17:34] Dispensed 0.001176 mL of Base (0.5 M KOH)  
[17:54] Stirrer speed set to 0  
[18:04] Datapoint id 10 collected

Sample name: **M15\_octanol**  
Assay name: **pH-metric high logP**  
Assay ID: **18B-28002**  
Filename: **C:\Sirius\_T3\Mehtap\20180227\_exp27\_logP\_T3-2\18B-28002\_M15\_octanol\_pH-metric high logP.t3r**

Experiment start time: **2/28/2018 1:10:47 AM**  
Analyst: **Pion**  
Instrument ID: **T312060**

## Experiment Log (continued)

[18:04] Charge balance equation is out by -20.3%  
[18:04] Stirrer speed set to 50  
[18:09] pH 3.92 -> 4.12  
[18:09] Using cautious pH adjust  
[18:10] Dispensed 0.000517 mL of Base (0.5 M KOH)  
[18:15] Stepping pH = 4.00  
[18:15] Dispensed 0.000470 mL of Base (0.5 M KOH)  
[18:20] Stepping pH = 4.09  
[18:20] Dispensed 0.000118 mL of Base (0.5 M KOH)  
[18:25] Stepping pH = 4.10  
[18:25] Dispensed 0.000118 mL of Base (0.5 M KOH)  
[18:30] Stepping pH = 4.12  
[18:45] Stirrer speed set to 0  
[18:55] Datapoint id 11 collected  
[18:55] Charge balance equation is out by -18.7%  
[18:55] Stirrer speed set to 50  
[19:00] pH 4.13 -> 4.33  
[19:00] Using cautious pH adjust  
[19:00] Dispensed 0.000517 mL of Base (0.5 M KOH)  
[19:05] Stepping pH = 4.26  
[19:06] Dispensed 0.000259 mL of Base (0.5 M KOH)  
[19:11] Stepping pH = 4.31  
[19:11] Dispensed 0.000071 mL of Base (0.5 M KOH)  
[19:16] Stepping pH = 4.32  
[19:16] Dispensed 0.000141 mL of Base (0.5 M KOH)  
[19:21] Stepping pH = 4.35  
[19:36] Stirrer speed set to 0  
[19:47] Datapoint id 12 collected  
[19:47] Charge balance equation is out by 3.7%  
[19:47] Stirrer speed set to 50  
[19:52] pH 4.35 -> 4.55  
[19:52] Using charge balance adjust  
[19:52] Dispensed 0.001152 mL of Base (0.5 M KOH)  
[20:12] Stirrer speed set to 0  
[20:22] Datapoint id 13 collected  
[20:22] Charge balance equation is out by 17.7%  
[20:22] Stirrer speed set to 50  
[20:27] pH 4.59 -> 4.79  
[20:27] Using cautious pH adjust  
[20:27] Dispensed 0.000729 mL of Base (0.5 M KOH)  
[20:32] Stepping pH = 4.71  
[20:33] Dispensed 0.000400 mL of Base (0.5 M KOH)  
[20:38] Stepping pH = 4.77  
[20:38] Dispensed 0.000094 mL of Base (0.5 M KOH)  
[20:43] Stepping pH = 4.77  
[20:43] Dispensed 0.000094 mL of Base (0.5 M KOH)  
[20:48] Stepping pH = 4.79  
[21:03] Stirrer speed set to 0  
[21:14] Datapoint id 14 collected  
[21:14] Charge balance equation is out by 8.9%  
[21:14] Stirrer speed set to 50  
[21:19] pH 4.78 -> 4.98  
[21:19] Using charge balance adjust  
[21:19] Dispensed 0.001740 mL of Base (0.5 M KOH)  
[21:39] Stirrer speed set to 0  
[21:50] Datapoint id 15 collected  
[21:50] Charge balance equation is out by 16.6%  
[21:50] Stirrer speed set to 50  
[21:55] pH 5.02 -> 5.22

Sample name: **M15\_octanol**  
Assay name: **pH-metric high logP**  
Assay ID: **18B-28002**  
Filename: **C:\Sirius\_T3\Mehtap\20180227\_exp27\_logP\_T3-2\18B-28002\_M15\_octanol\_pH-metric high logP.t3r**

Experiment start time: **2/28/2018 1:10:47 AM**  
Analyst: **Pion**  
Instrument ID: **T312060**

## Experiment Log (continued)

[21:55] Using cautious pH adjust  
[21:55] Dispensed 0.000988 mL of Base (0.5 M KOH)  
[22:00] Stepping pH = 5.14  
[22:00] Dispensed 0.000494 mL of Base (0.5 M KOH)  
[22:05] Stepping pH = 5.20  
[22:05] Dispensed 0.000188 mL of Base (0.5 M KOH)  
[22:10] Stepping pH = 5.21  
[22:25] Stirrer speed set to 0  
[22:35] Datapoint id 16 collected  
[22:35] Charge balance equation is out by 15.1%  
[22:35] Stirrer speed set to 50  
[22:40] pH 5.20 -> 5.40  
[22:40] Using cautious pH adjust  
[22:41] Dispensed 0.001011 mL of Base (0.5 M KOH)  
[22:46] Stepping pH = 5.32  
[22:46] Dispensed 0.000517 mL of Base (0.5 M KOH)  
[22:51] Stepping pH = 5.39  
[22:51] Dispensed 0.000118 mL of Base (0.5 M KOH)  
[22:56] Stepping pH = 5.39  
[22:56] Dispensed 0.000118 mL of Base (0.5 M KOH)  
[23:01] Stepping pH = 5.41  
[23:16] Stirrer speed set to 0  
[23:27] Datapoint id 17 collected  
[23:27] Charge balance equation is out by 12.5%  
[23:27] Stirrer speed set to 50  
[23:32] pH 5.40 -> 5.60  
[23:32] Using charge balance adjust  
[23:32] Dispensed 0.001858 mL of Base (0.5 M KOH)  
[23:52] Stirrer speed set to 0  
[24:03] Datapoint id 18 collected  
[24:03] Charge balance equation is out by 72.8%  
[24:03] Stirrer speed set to 50  
[24:08] pH 5.75 -> 5.95  
[24:08] Using cautious pH adjust  
[24:08] Dispensed 0.000659 mL of Base (0.5 M KOH)  
[24:13] Stepping pH = 5.93  
[24:13] Dispensed 0.000071 mL of Base (0.5 M KOH)  
[24:18] Stepping pH = 5.93  
[24:18] Dispensed 0.000118 mL of Base (0.5 M KOH)  
[24:23] Stepping pH = 5.97  
[24:38] Stirrer speed set to 0  
[24:49] Datapoint id 19 collected  
[24:49] Charge balance equation is out by 34.9%  
[24:49] Stirrer speed set to 50  
[24:54] pH 5.97 -> 6.17  
[24:54] Using cautious pH adjust  
[24:54] Dispensed 0.000494 mL of Base (0.5 M KOH)  
[24:59] Stepping pH = 6.20  
[25:14] Stirrer speed set to 0  
[25:24] Datapoint id 20 collected  
[25:24] Charge balance equation is out by 50.0%  
[25:24] Stirrer speed set to 50  
[25:29] pH 6.20 -> 6.40  
[25:29] Using cautious pH adjust  
[25:29] Dispensed 0.000329 mL of Base (0.5 M KOH)  
[25:34] Stepping pH = 6.42  
[25:49] Stirrer speed set to 0  
[26:00] Datapoint id 21 collected  
[26:00] Charge balance equation is out by 50.0%



Sample name: **M15\_octanol**  
Assay name: **pH-metric high logP**  
Assay ID: **18B-28002**  
Filename: **C:\Sirius\_T3\Mehtap\20180227\_exp27\_logP\_T3-2\18B-28002\_M15\_octanol\_pH-metric high logP.t3r**

Experiment start time: **2/28/2018 1:10:47 AM**  
Analyst: **Pion**  
Instrument ID: **T312060**

## Experiment Log (continued)

[26:00] Stirrer speed set to 50  
[26:05] pH 6.42 -> 6.62  
[26:05] Using cautious pH adjust  
[26:05] Dispensed 0.000212 mL of Base (0.5 M KOH)  
[26:10] Stepping pH = 6.60  
[26:10] Dispensed 0.000024 mL of Base (0.5 M KOH)  
[26:15] Stepping pH = 6.61  
[26:15] Dispensed 0.000024 mL of Base (0.5 M KOH)  
[26:20] Stepping pH = 6.62  
[26:36] Stirrer speed set to 0  
[26:46] Datapoint id 22 collected  
[26:46] Charge balance equation is out by 37.9%  
[26:46] Stirrer speed set to 50  
[26:51] pH 6.62 -> 6.82  
[26:51] Using cautious pH adjust  
[26:51] Dispensed 0.000141 mL of Base (0.5 M KOH)  
[26:56] Stepping pH = 6.84  
[27:11] Stirrer speed set to 0  
[27:45] Datapoint id 23 collected  
[27:45] Charge balance equation is out by 50.0%  
[27:45] Stirrer speed set to 50  
[27:51] pH 6.85 -> 7.05  
[27:51] Using cautious pH adjust  
[27:51] Dispensed 0.000094 mL of Base (0.5 M KOH)  
[27:56] Stepping pH = 7.02  
[27:56] Dispensed 0.000024 mL of Base (0.5 M KOH)  
[28:01] Stepping pH = 7.06  
[28:16] Stirrer speed set to 0  
[28:51] Datapoint id 24 collected  
[28:51] Charge balance equation is out by 39.1%  
[28:51] Stirrer speed set to 50  
[28:56] pH 7.08 -> 7.28  
[28:56] Using cautious pH adjust  
[28:56] Dispensed 0.000047 mL of Base (0.5 M KOH)  
[29:01] Stepping pH = 7.19  
[29:01] Dispensed 0.000024 mL of Base (0.5 M KOH)  
[29:07] Stepping pH = 7.28  
[29:22] Stirrer speed set to 0  
[30:11] Datapoint id 25 collected  
[30:11] Charge balance equation is out by 23.6%  
[30:11] Stirrer speed set to 50  
[30:16] pH 7.30 -> 7.50  
[30:16] Using cautious pH adjust  
[30:16] Dispensed 0.000024 mL of Base (0.5 M KOH)  
[30:21] Stepping pH = 7.31  
[30:22] Dispensed 0.000094 mL of Base (0.5 M KOH)  
[30:27] Stepping pH = 8.01  
[30:42] Stirrer speed set to 0  
[31:42] Datapoint id 26 collected  
[31:42] Charge balance equation is out by -92.6%  
[31:42] Stirrer speed set to 50  
[31:47] pH 8.09 -> 8.29  
[31:47] Using cautious pH adjust  
[31:47] Dispensed 0.000024 mL of Base (0.5 M KOH)  
[31:52] Stepping pH = 8.11  
[31:52] Dispensed 0.000024 mL of Base (0.5 M KOH)  
[31:57] Stepping pH = 8.18  
[31:57] Dispensed 0.000024 mL of Base (0.5 M KOH)  
[32:02] Stepping pH = 8.30

Sample name: **M15\_octanol**  
Assay name: **pH-metric high logP**  
Assay ID: **18B-28002**  
Filename: **C:\Sirius\_T3\Mehtap\20180227\_exp27\_logP\_T3-2\18B-28002\_M15\_octanol\_pH-metric high logP.t3r**

Experiment start time: **2/28/2018 1:10:47 AM**  
Analyst: **Pion**  
Instrument ID: **T312060**

## Experiment Log (continued)

[32:17] Stirrer speed set to 0  
[33:00] Datapoint id 27 collected  
[33:00] Charge balance equation is out by -279.3%  
[33:00] Stirrer speed set to 50  
[33:05] pH 8.36 -> 8.56  
[33:05] Using cautious pH adjust  
[33:05] Dispensed 0.000024 mL of Base (0.5 M KOH)  
[33:10] Stepping pH = 8.38  
[33:10] Dispensed 0.000024 mL of Base (0.5 M KOH)  
[33:15] Stepping pH = 8.46  
[33:15] Dispensed 0.000024 mL of Base (0.5 M KOH)  
[33:21] Stepping pH = 8.56  
[33:36] Stirrer speed set to 0  
[34:15] Datapoint id 28 collected  
[34:15] Charge balance equation is out by -251.0%  
[34:15] Stirrer speed set to 50  
[34:20] pH 8.60 -> 8.80  
[34:20] Using cautious pH adjust  
[34:20] Dispensed 0.000024 mL of Base (0.5 M KOH)  
[34:25] Stepping pH = 8.62  
[34:25] Dispensed 0.000047 mL of Base (0.5 M KOH)  
[34:30] Stepping pH = 8.79  
[34:30] Dispensed 0.000024 mL of Base (0.5 M KOH)  
[34:35] Stepping pH = 8.85  
[34:50] Stirrer speed set to 0  
[35:11] Datapoint id 29 collected  
[35:11] Charge balance equation is out by -177.5%  
[35:11] Stirrer speed set to 50  
[35:16] pH 8.86 -> 9.06  
[35:16] Using cautious pH adjust  
[35:17] Dispensed 0.000024 mL of Base (0.5 M KOH)  
[35:22] Stepping pH = 8.87  
[35:22] Dispensed 0.000071 mL of Base (0.5 M KOH)  
[35:27] Stepping pH = 9.07  
[35:42] Stirrer speed set to 0  
[36:11] Datapoint id 30 collected  
[36:11] Charge balance equation is out by -92.2%  
[36:11] Stirrer speed set to 50  
[36:16] pH 9.08 -> 9.28  
[36:16] Using cautious pH adjust  
[36:16] Dispensed 0.000047 mL of Base (0.5 M KOH)  
[36:21] Stepping pH = 9.12  
[36:21] Dispensed 0.000071 mL of Base (0.5 M KOH)  
[36:26] Stepping pH = 9.27  
[36:41] Stirrer speed set to 0  
[36:58] Datapoint id 31 collected  
[36:58] Charge balance equation is out by -49.9%  
[36:58] Stirrer speed set to 50  
[37:03] pH 9.28 -> 9.48  
[37:03] Using cautious pH adjust  
[37:03] Dispensed 0.000047 mL of Base (0.5 M KOH)  
[37:08] Stepping pH = 9.30  
[37:08] Dispensed 0.000141 mL of Base (0.5 M KOH)  
[37:13] Stepping pH = 9.51  
[37:28] Stirrer speed set to 0  
[37:42] Datapoint id 32 collected  
[37:42] Charge balance equation is out by -87.7%  
[37:42] Stirrer speed set to 50  
[37:47] pH 9.52 -> 9.72



Sample name: **M15\_octanol**  
Assay name: **pH-metric high logP**  
Assay ID: **18B-28002**  
Filename: **C:\Sirius\_T3\Mehtap\20180227\_exp27\_logP\_T3-2\18B-28002\_M15\_octanol\_pH-metric high logP.t3r**

Experiment start time: **2/28/2018 1:10:47 AM**  
Analyst: **Pion**  
Instrument ID: **T312060**

## Experiment Log (continued)

[37:47] Using cautious pH adjust  
[37:47] Dispensed 0.000094 mL of Base (0.5 M KOH)  
[37:52] Stepping pH = 9.58  
[37:52] Dispensed 0.000118 mL of Base (0.5 M KOH)  
[37:57] Stepping pH = 9.69  
[37:58] Dispensed 0.000024 mL of Base (0.5 M KOH)  
[38:03] Stepping pH = 9.70  
[38:03] Dispensed 0.000024 mL of Base (0.5 M KOH)  
[38:08] Stepping pH = 9.71  
[38:23] Stirrer speed set to 0  
[38:33] Datapoint id 33 collected  
[38:33] Charge balance equation is out by -52.5%  
[38:33] Stirrer speed set to 50  
[38:39] pH 9.71 -> 9.91  
[38:39] Using cautious pH adjust  
[38:39] Dispensed 0.000118 mL of Base (0.5 M KOH)  
[38:44] Stepping pH = 9.80  
[38:44] Dispensed 0.000118 mL of Base (0.5 M KOH)  
[38:49] Stepping pH = 9.88  
[38:49] Dispensed 0.000047 mL of Base (0.5 M KOH)  
[38:54] Stepping pH = 9.91  
[39:09] Stirrer speed set to 0  
[39:20] Datapoint id 34 collected  
[39:20] Charge balance equation is out by -10.0%  
[39:20] Stirrer speed set to 50  
[39:25] pH 9.91 -> 10.05  
[39:25] Using charge balance adjust  
[39:25] Dispensed 0.000235 mL of Base (0.5 M KOH)  
[39:45] Stirrer speed set to 0  
[39:55] Datapoint id 35 collected  
[39:55] Charge balance equation is out by -45.0%  
[39:55] Titration 2 of 3  
[39:55] Adding initial titrants  
[39:55] Automatically add 0.10000 mL of Octanol  
[39:58] Dispensed 0.100000 mL of Octanol  
[39:58] Stirrer speed set to 10  
[39:59] Stirrer speed set to 55  
[39:59] Iterative adjust 10.03 -> 2.00  
[39:59] pH 10.03 -> 2.00  
[40:01] Dispensed 0.098401 mL of Acid (0.5 M HCl)  
[40:51] Stirrer speed set to 0  
[41:01] Datapoint id 36 collected  
[41:01] Stirrer speed set to 55  
[41:06] pH 1.97 -> 2.17  
[41:06] Using cautious pH adjust  
[41:07] Dispensed 0.014111 mL of Base (0.5 M KOH)  
[41:12] Stepping pH = 2.07  
[41:12] Dispensed 0.010278 mL of Base (0.5 M KOH)  
[41:17] Stepping pH = 2.15  
[41:18] Dispensed 0.002658 mL of Base (0.5 M KOH)  
[41:23] Stepping pH = 2.18  
[41:38] Stirrer speed set to 0  
[41:48] Datapoint id 37 collected  
[41:48] Charge balance equation is out by 4.2%  
[41:48] Stirrer speed set to 55  
[41:53] pH 2.19 -> 2.39  
[41:53] Using charge balance adjust  
[41:53] Dispensed 0.018062 mL of Base (0.5 M KOH)  
[42:14] Stirrer speed set to 0

Sample name: **M15\_octanol**  
Assay name: **pH-metric high logP**  
Assay ID: **18B-28002**  
Filename: **C:\Sirius\_T3\Mehtap\20180227\_exp27\_logP\_T3-2\18B-28002\_M15\_octanol\_pH-metric high logP.t3r**

Experiment start time: **2/28/2018 1:10:47 AM**  
Analyst: **Pion**  
Instrument ID: **T312060**

## Experiment Log (continued)

[42:24] Datapoint id 38 collected  
[42:24] Charge balance equation is out by 5.1%  
[42:24] Stirrer speed set to 55  
[42:29] pH 2.40 -> 2.60  
[42:29] Using charge balance adjust  
[42:29] Dispensed 0.011900 mL of Base (0.5 M KOH)  
[42:49] Stirrer speed set to 0  
[42:59] Datapoint id 39 collected  
[42:59] Charge balance equation is out by 11.2%  
[42:59] Stirrer speed set to 55  
[43:05] pH 2.63 -> 2.83  
[43:05] Using charge balance adjust  
[43:05] Dispensed 0.007926 mL of Base (0.5 M KOH)  
[43:25] Stirrer speed set to 0  
[43:35] Datapoint id 40 collected  
[43:35] Charge balance equation is out by 3.5%  
[43:35] Stirrer speed set to 55  
[43:40] pH 2.84 -> 3.04  
[43:40] Using charge balance adjust  
[43:40] Dispensed 0.005503 mL of Base (0.5 M KOH)  
[44:01] Stirrer speed set to 0  
[44:11] Datapoint id 41 collected  
[44:11] Charge balance equation is out by 1.6%  
[44:11] Stirrer speed set to 55  
[44:16] pH 3.05 -> 3.25  
[44:16] Using charge balance adjust  
[44:16] Dispensed 0.003857 mL of Base (0.5 M KOH)  
[44:36] Stirrer speed set to 0  
[44:46] Datapoint id 42 collected  
[44:46] Charge balance equation is out by 10.8%  
[44:46] Stirrer speed set to 55  
[44:51] pH 3.28 -> 3.48  
[44:51] Using charge balance adjust  
[44:51] Dispensed 0.002611 mL of Base (0.5 M KOH)  
[45:12] Stirrer speed set to 0  
[45:22] Datapoint id 43 collected  
[45:22] Charge balance equation is out by -10.7%  
[45:22] Stirrer speed set to 55  
[45:27] pH 3.46 -> 3.66  
[45:27] Using charge balance adjust  
[45:27] Dispensed 0.001952 mL of Base (0.5 M KOH)  
[45:47] Stirrer speed set to 0  
[45:57] Datapoint id 44 collected  
[45:57] Charge balance equation is out by -21.3%  
[45:57] Stirrer speed set to 55  
[46:02] pH 3.63 -> 3.83  
[46:02] Using cautious pH adjust  
[46:02] Dispensed 0.000776 mL of Base (0.5 M KOH)  
[46:07] Stepping pH = 3.70  
[46:07] Dispensed 0.000729 mL of Base (0.5 M KOH)  
[46:13] Stepping pH = 3.78  
[46:13] Dispensed 0.000306 mL of Base (0.5 M KOH)  
[46:18] Stepping pH = 3.82  
[46:33] Stirrer speed set to 0  
[46:43] Datapoint id 45 collected  
[46:43] Charge balance equation is out by -17.3%  
[46:43] Stirrer speed set to 55  
[46:48] pH 3.82 -> 4.02  
[46:48] Using cautious pH adjust

Sample name: **M15\_octanol**  
Assay name: **pH-metric high logP**  
Assay ID: **18B-28002**  
Filename: **C:\Sirius\_T3\Mehtap\20180227\_exp27\_logP\_T3-2\18B-28002\_M15\_octanol\_pH-metric high logP.t3r**

Experiment start time: **2/28/2018 1:10:47 AM**  
Analyst: **Pion**  
Instrument ID: **T312060**

## Experiment Log (continued)

[46:48] Dispensed 0.000659 mL of Base (0.5 M KOH)  
[46:53] Stepping pH = 3.90  
[46:53] Dispensed 0.000588 mL of Base (0.5 M KOH)  
[46:58] Stepping pH = 3.98  
[46:58] Dispensed 0.000282 mL of Base (0.5 M KOH)  
[47:04] Stepping pH = 4.01  
[47:04] Dispensed 0.000118 mL of Base (0.5 M KOH)  
[47:09] Stepping pH = 4.02  
[47:24] Stirrer speed set to 0  
[47:34] Datapoint id 46 collected  
[47:34] Charge balance equation is out by -25.1%  
[47:34] Stirrer speed set to 55  
[47:39] pH 4.01 -> 4.21  
[47:39] Using cautious pH adjust  
[47:39] Dispensed 0.000611 mL of Base (0.5 M KOH)  
[47:44] Stepping pH = 4.09  
[47:44] Dispensed 0.000588 mL of Base (0.5 M KOH)  
[47:49] Stepping pH = 4.16  
[47:49] Dispensed 0.000306 mL of Base (0.5 M KOH)  
[47:55] Stepping pH = 4.20  
[47:55] Dispensed 0.000118 mL of Base (0.5 M KOH)  
[48:00] Stepping pH = 4.20  
[48:15] Stirrer speed set to 0  
[48:25] Datapoint id 47 collected  
[48:25] Charge balance equation is out by -30.8%  
[48:25] Stirrer speed set to 55  
[48:30] pH 4.20 -> 4.40  
[48:30] Using cautious pH adjust  
[48:30] Dispensed 0.000659 mL of Base (0.5 M KOH)  
[48:35] Stepping pH = 4.27  
[48:35] Dispensed 0.000682 mL of Base (0.5 M KOH)  
[48:40] Stepping pH = 4.34  
[48:40] Dispensed 0.000376 mL of Base (0.5 M KOH)  
[48:46] Stepping pH = 4.38  
[48:46] Dispensed 0.000141 mL of Base (0.5 M KOH)  
[48:51] Stepping pH = 4.39  
[49:06] Stirrer speed set to 0  
[49:16] Datapoint id 48 collected  
[49:16] Charge balance equation is out by -41.1%  
[49:16] Stirrer speed set to 55  
[49:21] pH 4.38 -> 4.58  
[49:21] Using cautious pH adjust  
[49:21] Dispensed 0.000753 mL of Base (0.5 M KOH)  
[49:26] Stepping pH = 4.45  
[49:26] Dispensed 0.000800 mL of Base (0.5 M KOH)  
[49:31] Stepping pH = 4.54  
[49:32] Dispensed 0.000353 mL of Base (0.5 M KOH)  
[49:37] Stepping pH = 4.56  
[49:37] Dispensed 0.000165 mL of Base (0.5 M KOH)  
[49:42] Stepping pH = 4.57  
[49:57] Stirrer speed set to 0  
[50:07] Datapoint id 49 collected  
[50:07] Charge balance equation is out by -36.8%  
[50:07] Stirrer speed set to 55  
[50:12] pH 4.56 -> 4.76  
[50:12] Using cautious pH adjust  
[50:12] Dispensed 0.000870 mL of Base (0.5 M KOH)  
[50:17] Stepping pH = 4.66  
[50:17] Dispensed 0.000659 mL of Base (0.5 M KOH)

Sample name: **M15\_octanol**  
Assay name: **pH-metric high logP**  
Assay ID: **18B-28002**  
Filename: **C:\Sirius\_T3\Mehtap\20180227\_exp27\_logP\_T3-2\18B-28002\_M15\_octanol\_pH-metric high logP.t3r**

Experiment start time: **2/28/2018 1:10:47 AM**  
Analyst: **Pion**  
Instrument ID: **T312060**

## Experiment Log (continued)

[50:22] Stepping pH = 4.74  
[50:22] Dispensed 0.000212 mL of Base (0.5 M KOH)  
[50:28] Stepping pH = 4.75  
[50:43] Stirrer speed set to 0  
[50:53] Datapoint id 50 collected  
[50:53] Charge balance equation is out by 0.1%  
[50:53] Stirrer speed set to 55  
[50:58] pH 4.74 -> 4.94  
[50:58] Using charge balance adjust  
[50:58] Dispensed 0.001929 mL of Base (0.5 M KOH)  
[51:18] Stirrer speed set to 0  
[51:29] Datapoint id 51 collected  
[51:29] Charge balance equation is out by 29.5%  
[51:29] Stirrer speed set to 55  
[51:34] pH 5.00 -> 5.20  
[51:34] Using cautious pH adjust  
[51:34] Dispensed 0.001011 mL of Base (0.5 M KOH)  
[51:39] Stepping pH = 5.17  
[51:39] Dispensed 0.000188 mL of Base (0.5 M KOH)  
[51:44] Stepping pH = 5.20  
[51:59] Stirrer speed set to 0  
[52:09] Datapoint id 52 collected  
[52:09] Charge balance equation is out by 41.1%  
[52:09] Stirrer speed set to 55  
[52:14] pH 5.19 -> 5.39  
[52:14] Using cautious pH adjust  
[52:14] Dispensed 0.000941 mL of Base (0.5 M KOH)  
[52:20] Stepping pH = 5.37  
[52:20] Dispensed 0.000071 mL of Base (0.5 M KOH)  
[52:25] Stepping pH = 5.37  
[52:25] Dispensed 0.000165 mL of Base (0.5 M KOH)  
[52:30] Stepping pH = 5.41  
[52:45] Stirrer speed set to 0  
[52:55] Datapoint id 53 collected  
[52:55] Charge balance equation is out by 37.1%  
[52:55] Stirrer speed set to 55  
[53:00] pH 5.40 -> 5.60  
[53:00] Using cautious pH adjust  
[53:00] Dispensed 0.000800 mL of Base (0.5 M KOH)  
[53:05] Stepping pH = 5.62  
[53:20] Stirrer speed set to 0  
[53:31] Datapoint id 54 collected  
[53:31] Charge balance equation is out by 50.0%  
[53:31] Stirrer speed set to 55  
[53:37] pH 5.62 -> 5.82  
[53:37] Using cautious pH adjust  
[53:37] Dispensed 0.000611 mL of Base (0.5 M KOH)  
[53:42] Stepping pH = 5.83  
[53:57] Stirrer speed set to 0  
[54:07] Datapoint id 55 collected  
[54:07] Charge balance equation is out by 50.0%  
[54:07] Stirrer speed set to 55  
[54:13] pH 5.84 -> 6.04  
[54:13] Using cautious pH adjust  
[54:13] Dispensed 0.000447 mL of Base (0.5 M KOH)  
[54:18] Stepping pH = 6.07  
[54:33] Stirrer speed set to 0  
[54:44] Datapoint id 56 collected  
[54:44] Charge balance equation is out by 50.0%

Sample name: **M15\_octanol**  
 Assay name: **pH-metric high logP**  
 Assay ID: **18B-28002**  
 Filename: **C:\Sirius\_T3\Mehtap\20180227\_exp27\_logP\_T3-2\18B-28002\_M15\_octanol\_pH-metric high logP.t3r**

Experiment start time: **2/28/2018 1:10:47 AM**  
 Analyst: **Pion**  
 Instrument ID: **T312060**

## Experiment Log (continued)

[54:44] Stirrer speed set to 55  
 [54:49] pH 6.07 -> 6.27  
 [54:49] Using cautious pH adjust  
 [54:50] Dispensed 0.000306 mL of Base (0.5 M KOH)  
 [54:55] Stepping pH = 6.34  
 [55:10] Stirrer speed set to 0  
 [55:26] Datapoint id 57 collected  
 [55:26] Charge balance equation is out by 50.0%  
 [55:26] Stirrer speed set to 55  
 [55:31] pH 6.34 -> 6.54  
 [55:31] Using cautious pH adjust  
 [55:31] Dispensed 0.000188 mL of Base (0.5 M KOH)  
 [55:36] Stepping pH = 6.51  
 [55:36] Dispensed 0.000024 mL of Base (0.5 M KOH)  
 [55:41] Stepping pH = 6.54  
 [55:56] Stirrer speed set to 0  
 [56:11] Datapoint id 58 collected  
 [56:11] Charge balance equation is out by 43.1%  
 [56:11] Stirrer speed set to 55  
 [56:16] pH 6.54 -> 6.74  
 [56:16] Using cautious pH adjust  
 [56:16] Dispensed 0.000118 mL of Base (0.5 M KOH)  
 [56:22] Stepping pH = 6.69  
 [56:22] Dispensed 0.000024 mL of Base (0.5 M KOH)  
 [56:27] Stepping pH = 6.73  
 [56:42] Stirrer speed set to 0  
 [57:13] Datapoint id 59 collected  
 [57:13] Charge balance equation is out by 37.4%  
 [57:13] Stirrer speed set to 55  
 [57:18] pH 6.75 -> 6.95  
 [57:18] Using cautious pH adjust  
 [57:18] Dispensed 0.000094 mL of Base (0.5 M KOH)  
 [57:23] Stepping pH = 7.12  
 [57:38] Stirrer speed set to 0  
 [58:37] Datapoint id 60 collected  
 [58:37] Charge balance equation is out by 50.0%  
 [58:37] Stirrer speed set to 55  
 [58:42] pH 7.14 -> 7.34  
 [58:42] Using cautious pH adjust  
 [58:42] Dispensed 0.000047 mL of Base (0.5 M KOH)  
 [58:47] Stepping pH = 7.20  
 [58:48] Dispensed 0.000047 mL of Base (0.5 M KOH)  
 [58:53] Stepping pH = 7.55  
 [59:08] Stirrer speed set to 0  
 [1:00:08] Datapoint id 61 collected  
 [1:00:08] Charge balance equation is out by -6.7%  
 [1:00:08] Stirrer speed set to 55  
 [1:00:13] pH 7.60 -> 7.80  
 [1:00:13] Using charge balance adjust  
 [1:00:13] Dispensed 0.000024 mL of Base (0.5 M KOH)  
 [1:00:33] Stirrer speed set to 0  
 [1:01:27] Datapoint id 62 collected  
 [1:01:27] Charge balance equation is out by -85.7%  
 [1:01:27] Stirrer speed set to 55  
 [1:01:32] pH 7.69 -> 7.89  
 [1:01:32] Using cautious pH adjust  
 [1:01:32] Dispensed 0.000024 mL of Base (0.5 M KOH)  
 [1:01:37] Stepping pH = 7.73  
 [1:01:37] Dispensed 0.000024 mL of Base (0.5 M KOH)

Sample name: **M15\_octanol**  
Assay name: **pH-metric high logP**  
Assay ID: **18B-28002**  
Filename: **C:\Sirius\_T3\Mehtap\20180227\_exp27\_logP\_T3-2\18B-28002\_M15\_octanol\_pH-metric high logP.t3r**

Experiment start time: **2/28/2018 1:10:47 AM**  
Analyst: **Pion**  
Instrument ID: **T312060**

## Experiment Log (continued)

[1:01:42] Stepping pH = 7.88  
[1:01:42] Dispensed 0.000024 mL of Base (0.5 M KOH)  
[1:01:47] Stepping pH = 8.02  
[1:02:02] Stirrer speed set to 0  
[1:03:01] Datapoint id 63 collected  
[1:03:01] Charge balance equation is out by -137.8%  
[1:03:01] Stirrer speed set to 55  
[1:03:06] pH 8.09 -> 8.29  
[1:03:06] Using cautious pH adjust  
[1:03:06] Dispensed 0.000024 mL of Base (0.5 M KOH)  
[1:03:11] Stepping pH = 8.15  
[1:03:11] Dispensed 0.000024 mL of Base (0.5 M KOH)  
[1:03:16] Stepping pH = 8.22  
[1:03:16] Dispensed 0.000024 mL of Base (0.5 M KOH)  
[1:03:21] Stepping pH = 8.32  
[1:03:36] Stirrer speed set to 0  
[1:04:21] Datapoint id 64 collected  
[1:04:21] Charge balance equation is out by -239.8%  
[1:04:21] Stirrer speed set to 55  
[1:04:26] pH 8.40 -> 8.60  
[1:04:26] Using cautious pH adjust  
[1:04:27] Dispensed 0.000024 mL of Base (0.5 M KOH)  
[1:04:32] Stepping pH = 8.43  
[1:04:32] Dispensed 0.000024 mL of Base (0.5 M KOH)  
[1:04:37] Stepping pH = 8.48  
[1:04:37] Dispensed 0.000024 mL of Base (0.5 M KOH)  
[1:04:42] Stepping pH = 8.55  
[1:04:42] Dispensed 0.000024 mL of Base (0.5 M KOH)  
[1:04:47] Stepping pH = 8.62  
[1:05:02] Stirrer speed set to 0  
[1:05:20] Datapoint id 65 collected  
[1:05:20] Charge balance equation is out by -340.7%  
[1:05:20] Stirrer speed set to 55  
[1:05:25] pH 8.67 -> 8.87  
[1:05:25] Using cautious pH adjust  
[1:05:25] Dispensed 0.000024 mL of Base (0.5 M KOH)  
[1:05:30] Stepping pH = 8.68  
[1:05:30] Dispensed 0.000047 mL of Base (0.5 M KOH)  
[1:05:36] Stepping pH = 8.75  
[1:05:36] Dispensed 0.000047 mL of Base (0.5 M KOH)  
[1:05:41] Stepping pH = 8.85  
[1:05:41] Dispensed 0.000024 mL of Base (0.5 M KOH)  
[1:05:46] Stepping pH = 8.89  
[1:06:01] Stirrer speed set to 0  
[1:06:22] Datapoint id 66 collected  
[1:06:22] Charge balance equation is out by -302.4%  
[1:06:22] Stirrer speed set to 55  
[1:06:28] pH 8.90 -> 9.10  
[1:06:28] Using cautious pH adjust  
[1:06:28] Dispensed 0.000024 mL of Base (0.5 M KOH)  
[1:06:33] Stepping pH = 8.91  
[1:06:33] Dispensed 0.000071 mL of Base (0.5 M KOH)  
[1:06:38] Stepping pH = 9.05  
[1:06:38] Dispensed 0.000024 mL of Base (0.5 M KOH)  
[1:06:43] Stepping pH = 9.08  
[1:06:43] Dispensed 0.000024 mL of Base (0.5 M KOH)  
[1:06:48] Stepping pH = 9.11  
[1:07:03] Stirrer speed set to 0  
[1:07:18] Datapoint id 67 collected



Sample name: **M15\_octanol**  
Assay name: **pH-metric high logP**  
Assay ID: **18B-28002**  
Filename: **C:\Sirius\_T3\Mehtap\20180227\_exp27\_logP\_T3-2\18B-28002\_M15\_octanol\_pH-metric high logP.t3r**

Experiment start time: **2/28/2018 1:10:47 AM**  
Analyst: **Pion**  
Instrument ID: **T312060**

## Experiment Log (continued)

[1:07:18] Charge balance equation is out by -180.0%  
[1:07:18] Stirrer speed set to 55  
[1:07:23] pH 9.12 -> 9.32  
[1:07:23] Using cautious pH adjust  
[1:07:23] Dispensed 0.000047 mL of Base (0.5 M KOH)  
[1:07:28] Stepping pH = 9.16  
[1:07:29] Dispensed 0.000094 mL of Base (0.5 M KOH)  
[1:07:34] Stepping pH = 9.30  
[1:07:34] Dispensed 0.000024 mL of Base (0.5 M KOH)  
[1:07:39] Stepping pH = 9.31  
[1:07:54] Stirrer speed set to 0  
[1:08:04] Datapoint id 68 collected  
[1:08:04] Charge balance equation is out by -73.1%  
[1:08:04] Stirrer speed set to 55  
[1:08:10] pH 9.32 -> 9.52  
[1:08:10] Using cautious pH adjust  
[1:08:10] Dispensed 0.000071 mL of Base (0.5 M KOH)  
[1:08:15] Stepping pH = 9.36  
[1:08:15] Dispensed 0.000118 mL of Base (0.5 M KOH)  
[1:08:20] Stepping pH = 9.47  
[1:08:20] Dispensed 0.000047 mL of Base (0.5 M KOH)  
[1:08:25] Stepping pH = 9.50  
[1:08:25] Dispensed 0.000024 mL of Base (0.5 M KOH)  
[1:08:30] Stepping pH = 9.51  
[1:08:45] Stirrer speed set to 0  
[1:09:02] Datapoint id 69 collected  
[1:09:02] Charge balance equation is out by -116.1%  
[1:09:02] Stirrer speed set to 55  
[1:09:07] pH 9.52 -> 9.72  
[1:09:07] Using cautious pH adjust  
[1:09:07] Dispensed 0.000094 mL of Base (0.5 M KOH)  
[1:09:13] Stepping pH = 9.53  
[1:09:13] Dispensed 0.000259 mL of Base (0.5 M KOH)  
[1:09:18] Stepping pH = 9.76  
[1:09:33] Stirrer speed set to 0  
[1:09:49] Datapoint id 70 collected  
[1:09:49] Charge balance equation is out by -89.8%  
[1:09:49] Stirrer speed set to 55  
[1:09:55] pH 9.76 -> 9.96  
[1:09:55] Using cautious pH adjust  
[1:09:55] Dispensed 0.000141 mL of Base (0.5 M KOH)  
[1:10:00] Stepping pH = 9.82  
[1:10:00] Dispensed 0.000212 mL of Base (0.5 M KOH)  
[1:10:05] Stepping pH = 9.94  
[1:10:05] Dispensed 0.000047 mL of Base (0.5 M KOH)  
[1:10:10] Stepping pH = 9.95  
[1:10:10] Dispensed 0.000024 mL of Base (0.5 M KOH)  
[1:10:15] Stepping pH = 9.96  
[1:10:30] Stirrer speed set to 0  
[1:10:40] Datapoint id 71 collected  
[1:10:40] Charge balance equation is out by -51.5%  
[1:10:40] Stirrer speed set to 55  
[1:10:45] pH 9.96 -> 10.05  
[1:10:45] Using cautious pH adjust  
[1:10:46] Dispensed 0.000094 mL of Base (0.5 M KOH)  
[1:10:51] Stepping pH = 9.99  
[1:10:51] Dispensed 0.000094 mL of Base (0.5 M KOH)  
[1:10:56] Stepping pH = 10.02  
[1:11:11] Stirrer speed set to 0

Sample name: **M15\_octanol**  
Assay name: **pH-metric high logP**  
Assay ID: **18B-28002**  
Filename: **C:\Sirius\_T3\Mehtap\20180227\_exp27\_logP\_T3-2\18B-28002\_M15\_octanol\_pH-metric high logP.t3r**

Experiment start time: **2/28/2018 1:10:47 AM**  
Analyst: **Pion**  
Instrument ID: **T312060**

## Experiment Log (continued)

[1:11:21] Datapoint id 72 collected  
[1:11:21] Charge balance equation is out by -8.6%  
[1:11:21] Titration 3 of 3  
[1:11:21] Adding initial titrants  
[1:11:21] Automatically add 0.30000 mL of Octanol  
[1:11:28] Dispensed 0.300000 mL of Octanol  
[1:11:28] Stirrer speed set to 10  
[1:11:29] Stirrer speed set to 60  
[1:11:29] Iterative adjust 10.02 -> 2.00  
[1:11:29] pH 10.02 -> 2.00  
[1:11:32] Dispensed 0.100000 mL of Acid (0.5 M HCl)  
[1:11:37] pH 2.02 -> 2.00  
[1:11:37] Dispensed 0.003881 mL of Acid (0.5 M HCl)  
[1:12:27] Stirrer speed set to 0  
[1:12:37] Datapoint id 73 collected  
[1:12:37] Stirrer speed set to 60  
[1:12:42] pH 1.98 -> 2.18  
[1:12:42] Using cautious pH adjust  
[1:12:43] Dispensed 0.015122 mL of Base (0.5 M KOH)  
[1:12:48] Stepping pH = 2.07  
[1:12:48] Dispensed 0.010160 mL of Base (0.5 M KOH)  
[1:12:53] Stepping pH = 2.15  
[1:12:54] Dispensed 0.002775 mL of Base (0.5 M KOH)  
[1:12:59] Stepping pH = 2.18  
[1:13:14] Stirrer speed set to 0  
[1:13:24] Datapoint id 74 collected  
[1:13:24] Charge balance equation is out by 7.3%  
[1:13:24] Stirrer speed set to 60  
[1:13:29] pH 2.19 -> 2.39  
[1:13:29] Using charge balance adjust  
[1:13:30] Dispensed 0.019450 mL of Base (0.5 M KOH)  
[1:13:50] Stirrer speed set to 0  
[1:14:00] Datapoint id 75 collected  
[1:14:00] Charge balance equation is out by 6.0%  
[1:14:00] Stirrer speed set to 60  
[1:14:05] pH 2.40 -> 2.60  
[1:14:05] Using charge balance adjust  
[1:14:06] Dispensed 0.012700 mL of Base (0.5 M KOH)  
[1:14:26] Stirrer speed set to 0  
[1:14:36] Datapoint id 76 collected  
[1:14:36] Charge balance equation is out by 11.5%  
[1:14:36] Stirrer speed set to 60  
[1:14:41] pH 2.63 -> 2.83  
[1:14:41] Using charge balance adjust  
[1:14:41] Dispensed 0.008443 mL of Base (0.5 M KOH)  
[1:15:01] Stirrer speed set to 0  
[1:15:11] Datapoint id 77 collected  
[1:15:11] Charge balance equation is out by -0.8%  
[1:15:11] Stirrer speed set to 60  
[1:15:17] pH 2.83 -> 3.03  
[1:15:17] Using charge balance adjust  
[1:15:17] Dispensed 0.005974 mL of Base (0.5 M KOH)  
[1:15:37] Stirrer speed set to 0  
[1:15:47] Datapoint id 78 collected  
[1:15:47] Charge balance equation is out by -2.6%  
[1:15:47] Stirrer speed set to 60  
[1:15:52] pH 3.03 -> 3.23  
[1:15:52] Using charge balance adjust  
[1:15:52] Dispensed 0.004280 mL of Base (0.5 M KOH)



Sample name: **M15\_octanol**  
Assay name: **pH-metric high logP**  
Assay ID: **18B-28002**  
Filename: **C:\Sirius\_T3\Mehtap\20180227\_exp27\_logP\_T3-2\18B-28002\_M15\_octanol\_pH-metric high logP.t3r**

Experiment start time: **2/28/2018 1:10:47 AM**  
Analyst: **Pion**  
Instrument ID: **T312060**

## Experiment Log (continued)

[1:16:12] Stirrer speed set to 0  
[1:16:22] Datapoint id 79 collected  
[1:16:22] Charge balance equation is out by 6.7%  
[1:16:22] Stirrer speed set to 60  
[1:16:28] pH 3.25 -> 3.45  
[1:16:28] Using charge balance adjust  
[1:16:28] Dispensed 0.003010 mL of Base (0.5 M KOH)  
[1:16:48] Stirrer speed set to 0  
[1:16:59] Datapoint id 80 collected  
[1:16:59] Charge balance equation is out by -9.4%  
[1:16:59] Stirrer speed set to 60  
[1:17:04] pH 3.43 -> 3.63  
[1:17:04] Using charge balance adjust  
[1:17:04] Dispensed 0.002305 mL of Base (0.5 M KOH)  
[1:17:24] Stirrer speed set to 0  
[1:17:39] Datapoint id 81 collected  
[1:17:39] Charge balance equation is out by -27.6%  
[1:17:39] Stirrer speed set to 60  
[1:17:44] pH 3.57 -> 3.77  
[1:17:44] Using cautious pH adjust  
[1:17:44] Dispensed 0.000988 mL of Base (0.5 M KOH)  
[1:17:49] Stepping pH = 3.65  
[1:17:49] Dispensed 0.000917 mL of Base (0.5 M KOH)  
[1:17:55] Stepping pH = 3.73  
[1:17:55] Dispensed 0.000423 mL of Base (0.5 M KOH)  
[1:18:00] Stepping pH = 3.76  
[1:18:00] Dispensed 0.000118 mL of Base (0.5 M KOH)  
[1:18:05] Stepping pH = 3.77  
[1:18:20] Stirrer speed set to 0  
[1:18:30] Datapoint id 82 collected  
[1:18:30] Charge balance equation is out by -24.4%  
[1:18:30] Stirrer speed set to 60  
[1:18:35] pH 3.76 -> 3.96  
[1:18:35] Using cautious pH adjust  
[1:18:35] Dispensed 0.000870 mL of Base (0.5 M KOH)  
[1:18:40] Stepping pH = 3.85  
[1:18:40] Dispensed 0.000706 mL of Base (0.5 M KOH)  
[1:18:46] Stepping pH = 3.91  
[1:18:46] Dispensed 0.000400 mL of Base (0.5 M KOH)  
[1:18:51] Stepping pH = 3.94  
[1:18:51] Dispensed 0.000188 mL of Base (0.5 M KOH)  
[1:18:56] Stepping pH = 3.95  
[1:19:11] Stirrer speed set to 0  
[1:19:21] Datapoint id 83 collected  
[1:19:21] Charge balance equation is out by -24.7%  
[1:19:21] Stirrer speed set to 60  
[1:19:26] pH 3.94 -> 4.14  
[1:19:26] Using cautious pH adjust  
[1:19:26] Dispensed 0.000847 mL of Base (0.5 M KOH)  
[1:19:31] Stepping pH = 4.01  
[1:19:31] Dispensed 0.000917 mL of Base (0.5 M KOH)  
[1:19:37] Stepping pH = 4.09  
[1:19:37] Dispensed 0.000447 mL of Base (0.5 M KOH)  
[1:19:42] Stepping pH = 4.12  
[1:19:42] Dispensed 0.000165 mL of Base (0.5 M KOH)  
[1:19:47] Stepping pH = 4.13  
[1:20:02] Stirrer speed set to 0  
[1:20:12] Datapoint id 84 collected  
[1:20:12] Charge balance equation is out by -41.6%

Sample name: **M15\_octanol**  
Assay name: **pH-metric high logP**  
Assay ID: **18B-28002**  
Filename: **C:\Sirius\_T3\Mehtap\20180227\_exp27\_logP\_T3-2\18B-28002\_M15\_octanol\_pH-metric high logP.t3r**

Experiment start time: **2/28/2018 1:10:47 AM**  
Analyst: **Pion**  
Instrument ID: **T312060**

## Experiment Log (continued)

[1:20:12] Stirrer speed set to 60  
[1:20:17] pH 4.11 -> 4.31  
[1:20:17] Using cautious pH adjust  
[1:20:17] Dispensed 0.000894 mL of Base (0.5 M KOH)  
[1:20:22] Stepping pH = 4.19  
[1:20:22] Dispensed 0.000823 mL of Base (0.5 M KOH)  
[1:20:28] Stepping pH = 4.27  
[1:20:28] Dispensed 0.000329 mL of Base (0.5 M KOH)  
[1:20:33] Stepping pH = 4.30  
[1:20:33] Dispensed 0.000141 mL of Base (0.5 M KOH)  
[1:20:38] Stepping pH = 4.30  
[1:20:53] Stirrer speed set to 0  
[1:21:03] Datapoint id 85 collected  
[1:21:03] Charge balance equation is out by -23.0%  
[1:21:03] Stirrer speed set to 60  
[1:21:08] pH 4.29 -> 4.49  
[1:21:08] Using cautious pH adjust  
[1:21:08] Dispensed 0.000964 mL of Base (0.5 M KOH)  
[1:21:13] Stepping pH = 4.39  
[1:21:14] Dispensed 0.000706 mL of Base (0.5 M KOH)  
[1:21:19] Stepping pH = 4.47  
[1:21:19] Dispensed 0.000188 mL of Base (0.5 M KOH)  
[1:21:24] Stepping pH = 4.49  
[1:21:39] Stirrer speed set to 0  
[1:21:49] Datapoint id 86 collected  
[1:21:49] Charge balance equation is out by 3.5%  
[1:21:49] Stirrer speed set to 60  
[1:21:55] pH 4.47 -> 4.67  
[1:21:55] Using charge balance adjust  
[1:21:55] Dispensed 0.002046 mL of Base (0.5 M KOH)  
[1:22:15] Stirrer speed set to 0  
[1:22:25] Datapoint id 87 collected  
[1:22:25] Charge balance equation is out by 40.8%  
[1:22:25] Stirrer speed set to 60  
[1:22:31] pH 4.75 -> 4.95  
[1:22:31] Using cautious pH adjust  
[1:22:31] Dispensed 0.001035 mL of Base (0.5 M KOH)  
[1:22:36] Stepping pH = 4.93  
[1:22:36] Dispensed 0.000094 mL of Base (0.5 M KOH)  
[1:22:41] Stepping pH = 4.94  
[1:22:56] Stirrer speed set to 0  
[1:23:07] Datapoint id 88 collected  
[1:23:07] Charge balance equation is out by 45.1%  
[1:23:07] Stirrer speed set to 60  
[1:23:12] pH 4.93 -> 5.13  
[1:23:12] Using cautious pH adjust  
[1:23:12] Dispensed 0.000941 mL of Base (0.5 M KOH)  
[1:23:17] Stepping pH = 5.13  
[1:23:32] Stirrer speed set to 0  
[1:23:42] Datapoint id 89 collected  
[1:23:42] Charge balance equation is out by 50.0%  
[1:23:42] Stirrer speed set to 60  
[1:23:47] pH 5.11 -> 5.31  
[1:23:47] Using cautious pH adjust  
[1:23:47] Dispensed 0.000800 mL of Base (0.5 M KOH)  
[1:23:52] Stepping pH = 5.34  
[1:24:07] Stirrer speed set to 0  
[1:24:24] Datapoint id 90 collected  
[1:24:24] Charge balance equation is out by 50.0%

Sample name: **M15\_octanol**  
Assay name: **pH-metric high logP**  
Assay ID: **18B-28002**  
Filename: **C:\Sirius\_T3\Mehtap\20180227\_exp27\_logP\_T3-2\18B-28002\_M15\_octanol\_pH-metric high logP.t3r**

Experiment start time: **2/28/2018 1:10:47 AM**  
Analyst: **Pion**  
Instrument ID: **T312060**

## Experiment Log (continued)

[1:24:24] Stirrer speed set to 60  
[1:24:30] pH 5.32 -> 5.52  
[1:24:30] Using cautious pH adjust  
[1:24:30] Dispensed 0.000611 mL of Base (0.5 M KOH)  
[1:24:35] Stepping pH = 5.57  
[1:24:50] Stirrer speed set to 0  
[1:25:01] Datapoint id 91 collected  
[1:25:01] Charge balance equation is out by 50.0%  
[1:25:01] Stirrer speed set to 60  
[1:25:06] pH 5.56 -> 5.76  
[1:25:06] Using cautious pH adjust  
[1:25:06] Dispensed 0.000423 mL of Base (0.5 M KOH)  
[1:25:11] Stepping pH = 5.85  
[1:25:26] Stirrer speed set to 0  
[1:25:39] Datapoint id 92 collected  
[1:25:39] Charge balance equation is out by 50.0%  
[1:25:39] Stirrer speed set to 60  
[1:25:44] pH 5.85 -> 6.05  
[1:25:44] Using cautious pH adjust  
[1:25:44] Dispensed 0.000259 mL of Base (0.5 M KOH)  
[1:25:49] Stepping pH = 6.16  
[1:26:04] Stirrer speed set to 0  
[1:26:35] Datapoint id 93 collected  
[1:26:35] Charge balance equation is out by 50.0%  
[1:26:35] Stirrer speed set to 60  
[1:26:40] pH 6.11 -> 6.31  
[1:26:40] Using cautious pH adjust  
[1:26:40] Dispensed 0.000165 mL of Base (0.5 M KOH)  
[1:26:46] Stepping pH = 6.42  
[1:27:01] Stirrer speed set to 0  
[1:27:43] Datapoint id 94 collected  
[1:27:43] Charge balance equation is out by 50.0%  
[1:27:43] Stirrer speed set to 60  
[1:27:48] pH 6.39 -> 6.59  
[1:27:48] Using cautious pH adjust  
[1:27:48] Dispensed 0.000094 mL of Base (0.5 M KOH)  
[1:27:53] Stepping pH = 6.50  
[1:27:53] Dispensed 0.000071 mL of Base (0.5 M KOH)  
[1:27:58] Stepping pH = 6.74  
[1:28:13] Stirrer speed set to 0  
[1:29:09] Datapoint id 95 collected  
[1:29:09] Charge balance equation is out by 21.9%  
[1:29:09] Stirrer speed set to 60  
[1:29:14] pH 6.69 -> 6.89  
[1:29:14] Using cautious pH adjust  
[1:29:14] Dispensed 0.000071 mL of Base (0.5 M KOH)  
[1:29:20] Stepping pH = 6.88  
[1:29:20] Dispensed 0.000024 mL of Base (0.5 M KOH)  
[1:29:25] Stepping pH = 6.99  
[1:29:40] Stirrer speed set to 0  
[1:30:40] Datapoint id 96 collected  
[1:30:40] Charge balance equation is out by 34.4%  
[1:30:40] Stirrer speed set to 60  
[1:30:45] pH 7.00 -> 7.20  
[1:30:45] Using cautious pH adjust  
[1:30:45] Dispensed 0.000047 mL of Base (0.5 M KOH)  
[1:30:50] Stepping pH = 7.14  
[1:30:50] Dispensed 0.000024 mL of Base (0.5 M KOH)  
[1:30:55] Stepping pH = 7.32

Sample name: **M15\_octanol**  
 Assay name: **pH-metric high logP**  
 Assay ID: **18B-28002**  
 Filename: **C:\Sirius\_T3\Mehtap\20180227\_exp27\_logP\_T3-2\18B-28002\_M15\_octanol\_pH-metric high logP.t3r**

Experiment start time: **2/28/2018 1:10:47 AM**  
 Analyst: **Pion**  
 Instrument ID: **T312060**

## Experiment Log (continued)

[1:31:11] Stirrer speed set to 0  
 [1:32:11] Datapoint id 97 collected  
 [1:32:11] Charge balance equation is out by 22.4%  
 [1:32:11] Stirrer speed set to 60  
 [1:32:16] pH 7.20 -> 7.40  
 [1:32:16] Using cautious pH adjust  
 [1:32:16] Dispensed 0.000024 mL of Base (0.5 M KOH)  
 [1:32:21] Stepping pH = 7.16  
 [1:32:21] Dispensed 0.000141 mL of Base (0.5 M KOH)  
 [1:32:26] Stepping pH = 8.36  
 [1:32:41] Stirrer speed set to 0  
 [1:33:41] Datapoint id 98 collected  
 [1:33:41] Charge balance equation is out by -248.0%  
 [1:33:41] Stirrer speed set to 60  
 [1:33:46] pH 8.32 -> 8.52  
 [1:33:46] Using cautious pH adjust  
 [1:33:46] Dispensed 0.000024 mL of Base (0.5 M KOH)  
 [1:33:51] Stepping pH = 8.32  
 [1:33:51] Dispensed 0.000024 mL of Base (0.5 M KOH)  
 [1:33:56] Stepping pH = 8.34  
 [1:33:57] Dispensed 0.000094 mL of Base (0.5 M KOH)  
 [1:34:02] Stepping pH = 8.63  
 [1:34:17] Stirrer speed set to 0  
 [1:34:34] Datapoint id 99 collected  
 [1:34:34] Charge balance equation is out by -554.6%  
 [1:34:34] Stirrer speed set to 60  
 [1:34:39] pH 8.67 -> 8.87  
 [1:34:39] Using cautious pH adjust  
 [1:34:39] Dispensed 0.000024 mL of Base (0.5 M KOH)  
 [1:34:45] Stepping pH = 8.67  
 [1:34:45] Dispensed 0.000047 mL of Base (0.5 M KOH)  
 [1:34:50] Stepping pH = 8.72  
 [1:34:50] Dispensed 0.000094 mL of Base (0.5 M KOH)  
 [1:34:55] Stepping pH = 8.88  
 [1:35:10] Stirrer speed set to 0  
 [1:35:31] Datapoint id 100 collected  
 [1:35:31] Charge balance equation is out by -321.4%  
 [1:35:31] Stirrer speed set to 60  
 [1:35:37] pH 8.92 -> 9.12  
 [1:35:37] Using cautious pH adjust  
 [1:35:37] Dispensed 0.000024 mL of Base (0.5 M KOH)  
 [1:35:42] Stepping pH = 8.92  
 [1:35:42] Dispensed 0.000094 mL of Base (0.5 M KOH)  
 [1:35:47] Stepping pH = 9.04  
 [1:35:47] Dispensed 0.000047 mL of Base (0.5 M KOH)  
 [1:35:52] Stepping pH = 9.08  
 [1:35:52] Dispensed 0.000047 mL of Base (0.5 M KOH)  
 [1:35:57] Stepping pH = 9.13  
 [1:36:12] Stirrer speed set to 0  
 [1:36:24] Datapoint id 101 collected  
 [1:36:24] Charge balance equation is out by -240.5%  
 [1:36:24] Stirrer speed set to 60  
 [1:36:29] pH 9.12 -> 9.32  
 [1:36:29] Using cautious pH adjust  
 [1:36:29] Dispensed 0.000047 mL of Base (0.5 M KOH)  
 [1:36:34] Stepping pH = 9.14  
 [1:36:34] Dispensed 0.000118 mL of Base (0.5 M KOH)  
 [1:36:39] Stepping pH = 9.30  
 [1:36:39] Dispensed 0.000024 mL of Base (0.5 M KOH)

Sample name: **M15\_octanol**  
Assay name: **pH-metric high logP**  
Assay ID: **18B-28002**  
Filename: **C:\Sirius\_T3\Mehtap\20180227\_exp27\_logP\_T3-2\18B-28002\_M15\_octanol\_pH-metric high logP.t3r**

Experiment start time: **2/28/2018 1:10:47 AM**  
Analyst: **Pion**  
Instrument ID: **T312060**

## Experiment Log (continued)

[1:36:44] Stepping pH = 9.31  
[1:37:00] Stirrer speed set to 0  
[1:37:12] Datapoint id 102 collected  
[1:37:12] Charge balance equation is out by -99.8%  
[1:37:12] Stirrer speed set to 60  
[1:37:17] pH 9.31 -> 9.51  
[1:37:17] Using cautious pH adjust  
[1:37:17] Dispensed 0.000071 mL of Base (0.5 M KOH)  
[1:37:22] Stepping pH = 9.35  
[1:37:22] Dispensed 0.000141 mL of Base (0.5 M KOH)  
[1:37:27] Stepping pH = 9.48  
[1:37:27] Dispensed 0.000047 mL of Base (0.5 M KOH)  
[1:37:32] Stepping pH = 9.50  
[1:37:32] Dispensed 0.000024 mL of Base (0.5 M KOH)  
[1:37:37] Stepping pH = 9.52  
[1:37:52] Stirrer speed set to 0  
[1:38:03] Datapoint id 103 collected  
[1:38:03] Charge balance equation is out by -92.7%  
[1:38:03] Stirrer speed set to 60  
[1:38:09] pH 9.52 -> 9.72  
[1:38:09] Using cautious pH adjust  
[1:38:09] Dispensed 0.000094 mL of Base (0.5 M KOH)  
[1:38:14] Stepping pH = 9.59  
[1:38:14] Dispensed 0.000141 mL of Base (0.5 M KOH)  
[1:38:19] Stepping pH = 9.68  
[1:38:19] Dispensed 0.000047 mL of Base (0.5 M KOH)  
[1:38:24] Stepping pH = 9.70  
[1:38:24] Dispensed 0.000047 mL of Base (0.5 M KOH)  
[1:38:29] Stepping pH = 9.72  
[1:38:44] Stirrer speed set to 0  
[1:38:54] Datapoint id 104 collected  
[1:38:54] Charge balance equation is out by -63.5%  
[1:38:54] Stirrer speed set to 60  
[1:38:59] pH 9.73 -> 9.93  
[1:38:59] Using cautious pH adjust  
[1:38:59] Dispensed 0.000141 mL of Base (0.5 M KOH)  
[1:39:05] Stepping pH = 9.81  
[1:39:05] Dispensed 0.000165 mL of Base (0.5 M KOH)  
[1:39:10] Stepping pH = 9.90  
[1:39:10] Dispensed 0.000071 mL of Base (0.5 M KOH)  
[1:39:15] Stepping pH = 9.92  
[1:39:15] Dispensed 0.000024 mL of Base (0.5 M KOH)  
[1:39:20] Stepping pH = 9.93  
[1:39:35] Stirrer speed set to 0  
[1:39:46] Datapoint id 105 collected  
[1:39:46] Charge balance equation is out by -32.3%  
[1:39:46] Stirrer speed set to 60  
[1:39:51] pH 9.93 -> 10.05  
[1:39:51] Using cautious pH adjust  
[1:39:51] Dispensed 0.000118 mL of Base (0.5 M KOH)  
[1:39:56] Stepping pH = 9.98  
[1:39:56] Dispensed 0.000118 mL of Base (0.5 M KOH)  
[1:40:01] Stepping pH = 10.03  
[1:40:16] Stirrer speed set to 0  
[1:40:27] Datapoint id 106 collected  
[1:40:27] Charge balance equation is out by 0.6%  
[1:40:27] Argon flow rate set to 0  
[1:40:31] Titrator arm moved over Titration position
