# Supplementary material for: Octanol-water partition coefficient measurements for the SAMPL6 Blind Prediction Challenge
Source: bioRxiv or medRxiv preprint supplement (doi:10.1101/757393), 2019-12-02
Supplement: Supplementary file [file media-2.zip]

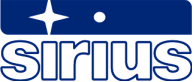

Sample name: **M08\_octanol** Experiment start time: **3/2/2018 5:10:52 PM**  
Assay name: **pH-metric high logP** Analyst: **Pion**  
Assay ID: **18C-02007** Instrument ID: **T312060**  
Filename: **C:\Sirius\_T3\Mehtap\20180302\_exp29\_logP\_T3-2\18C-02007\_M08\_octanol\_pH-metric high logP.t3r**

## pH-metric Result

logP (neutral XH) 3.05 ±0.01 (n=50)  
logP (X -) -0.40 ±0.05 (n=50)

### 18C-02007 Points 2 to 38

M08\_octanol concentration factor 1.137  
Carbonate 0.0754 mM  
Acidity error -1.80478 mM

### 18C-02007 Points 39 to 77

M08\_octanol concentration factor 0.855  
Carbonate 0.3938 mM  
Acidity error -1.60863 mM

### 18C-02007 Points 78 to 114

M08\_octanol concentration factor 0.850  
Carbonate 0.3937 mM  
Acidity error -1.48346 mM

## Warnings and errors

Errors None  
Warnings None

## Sample logD and percent species

| pH     | M08_octanol<br>logD | M08_octanol<br>M08_octanolH | M08_octanol<br>M08_octanol | M08_octanol<br>M08_octanolH* | M08_octanol<br>M08_octanol* | Comment    |
|--------|---------------------|-----------------------------|----------------------------|------------------------------|-----------------------------|------------|
| 1.000  | 3.05                | 0.09 %                      | 0.00 %                     | 99.91 %                      | 0.00 %                      | Stomach pH |
| 1.200  | 3.05                | 0.09 %                      | 0.00 %                     | 99.91 %                      | 0.00 %                      |            |
| 2.000  | 3.05                | 0.09 %                      | 0.00 %                     | 99.91 %                      | 0.00 %                      |            |
| 3.000  | 3.03                | 0.09 %                      | 0.01 %                     | 99.90 %                      | 0.00 %                      |            |
| 4.000  | 2.85                | 0.09 %                      | 0.05 %                     | 99.84 %                      | 0.02 %                      |            |
| 5.000  | 2.21                | 0.09 %                      | 0.53 %                     | 99.18 %                      | 0.21 %                      | Blood pH   |
| 6.000  | 1.28                | 0.08 %                      | 4.94 %                     | 93.03 %                      | 1.95 %                      |            |
| 6.500  | 0.80                | 0.07 %                      | 13.61 %                    | 80.97 %                      | 5.36 %                      |            |
| 7.000  | 0.36                | 0.05 %                      | 30.52 %                    | 57.42 %                      | 12.01 %                     |            |
| 7.400  | 0.06                | 0.03 %                      | 46.65 %                    | 34.95 %                      | 18.36 %                     |            |
| 8.000  | -0.24               | 0.01 %                      | 63.21 %                    | 11.90 %                      | 24.88 %                     |            |
| 9.000  | -0.38               | 0.00 %                      | 70.80 %                    | 1.33 %                       | 27.87 %                     |            |
| 10.000 | -0.40               | 0.00 %                      | 71.66 %                    | 0.13 %                       | 28.21 %                     |            |
| 11.000 | -0.40               | 0.00 %                      | 71.74 %                    | 0.01 %                       | 28.24 %                     |            |
| 12.000 | -0.40               | 0.00 %                      | 71.75 %                    | 0.00 %                       | 28.25 %                     |            |

Sample name: **M08\_octanol**  
 Assay name: **pH-metric high logP**  
 Assay ID: **18C-02007**  
 Filename: **C:\Sirius\_T3\Mehtap\20180302\_exp29\_logP\_T3-2\18C-02007\_M08\_octanol\_pH-metric high logP.t3r**

Experiment start time: **3/2/2018 5:10:52 PM**  
 Analyst: **Pion**  
 Instrument ID: **T312060**

## Graphs

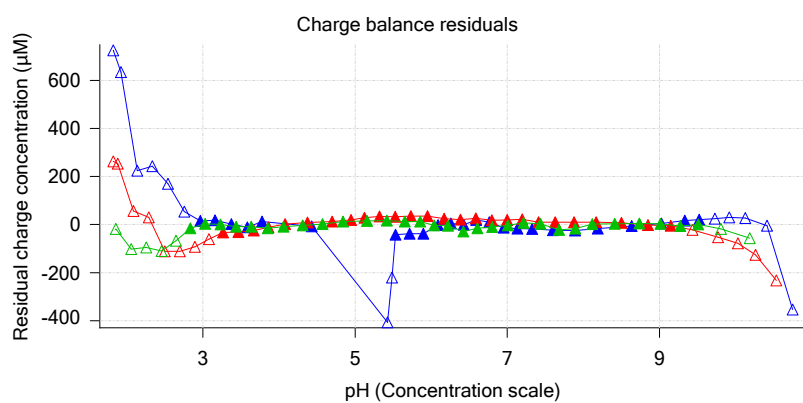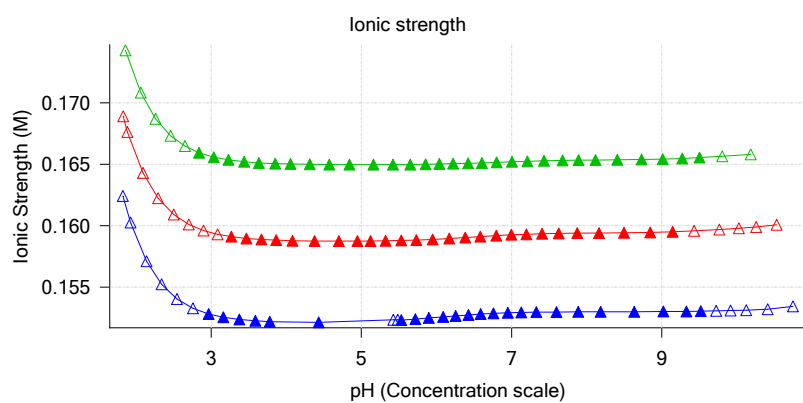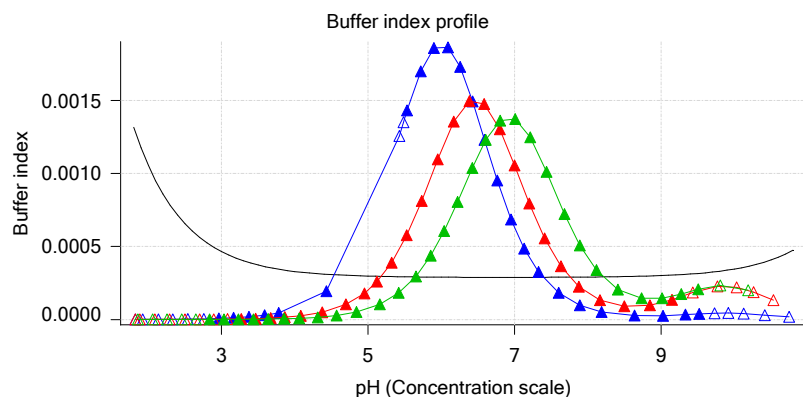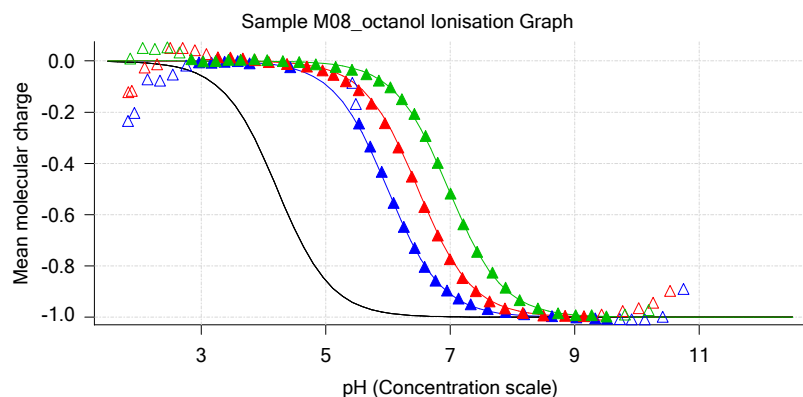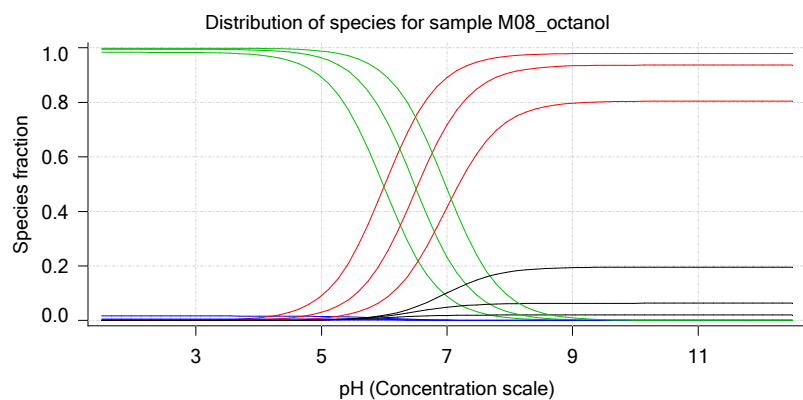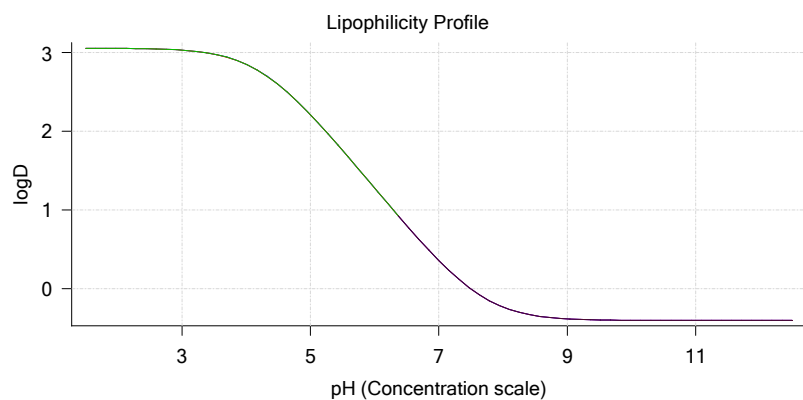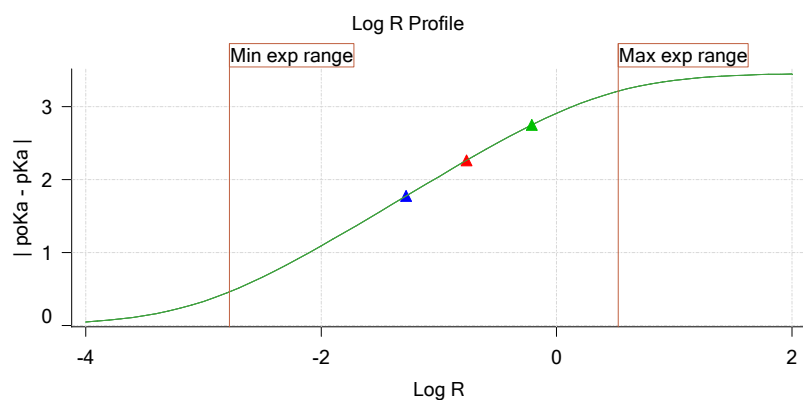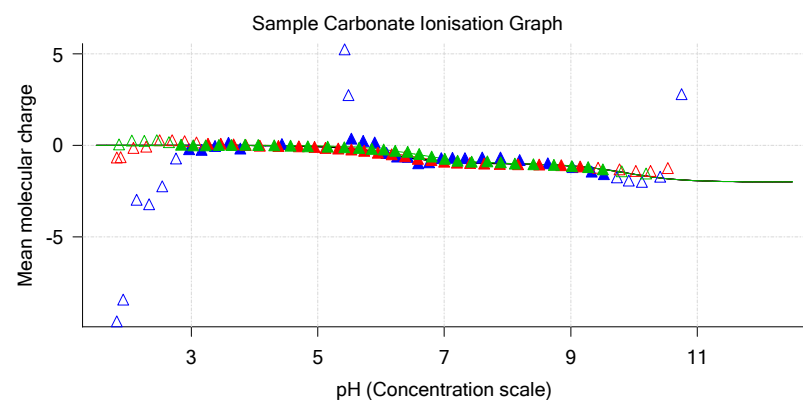

Sample name: **M08\_octanol**  
 Assay name: **pH-metric high logP**  
 Assay ID: **18C-02007**  
 Filename: **C:\Sirius\_T3\Mehtap\20180302\_exp29\_logP\_T3-2\18C-02007\_M08\_octanol\_pH-metric high logP.t3r**

Experiment start time: **3/2/2018 5:10:52 PM**  
 Analyst: **Pion**  
 Instrument ID: **T312060**

## Graphs (continued)

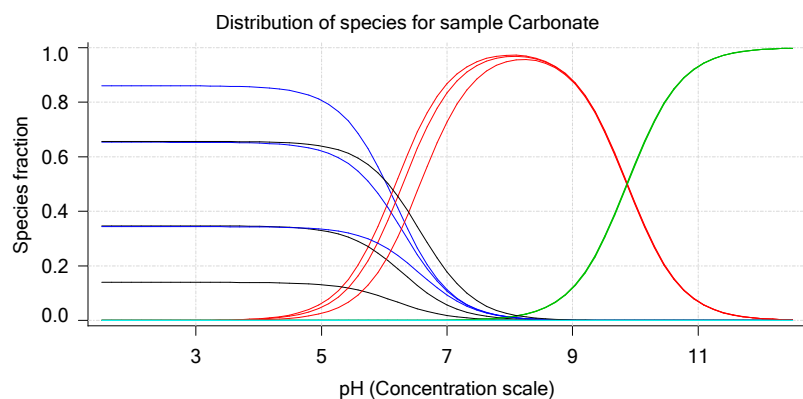

Sample name: **M08\_octanol**  
 Assay name: **pH-metric high logP**  
 Assay ID: **18C-02007**  
 Filename: **C:\Sirius\_T3\Mehtap\20180302\_exp29\_logP\_T3-2\18C-02007\_M08\_octanol\_pH-metric high logP.t3r**

Experiment start time: **3/2/2018 5:10:52 PM**  
 Analyst: **Pion**  
 Instrument ID: **T312060**

## pH-metric high logP Titration 1 of 3 18C-02007 Points 2 to 38

### Overall results

RMSD 0.092  
 Average ionic strength 0.153 M  
 Average temperature 25.0°C  
 Partition ratio 0.0526 : 1  
 Analyte concentration range 2593.3 µM to 2686.2 µM  
 Total points considered 24 of 37

### Warnings and errors

Errors None  
 Warnings One or more logP values out of range  
 Excessive acidity error present

### Four-Plus parameters

Alpha 0.111 3/2/2018 5:10:52 PM C:\Sirius\_T3\HCl18C02.t3r  
 S 0.9988 3/2/2018 5:10:52 PM C:\Sirius\_T3\HCl18C02.t3r  
 jH 1.0 3/2/2018 5:10:52 PM C:\Sirius\_T3\HCl18C02.t3r  
 jOH -0.8 3/2/2018 5:10:52 PM C:\Sirius\_T3\HCl18C02.t3r

### Titrants

0.50 M HCl 0.999058 3/2/2018 5:10:52 PM C:\Sirius\_T3\HCl18C02.t3r  
 0.50 M KOH 0.999845 3/2/2018 5:10:52 PM C:\Sirius\_T3\KOH18B27.t3r

### Sample

M08\_octanol concentration factor 1.137  
 Acid pKa 1 4.22  
 logP (neutral XH) 3.06  
 logP (X -) -5.22

### Sample graphs

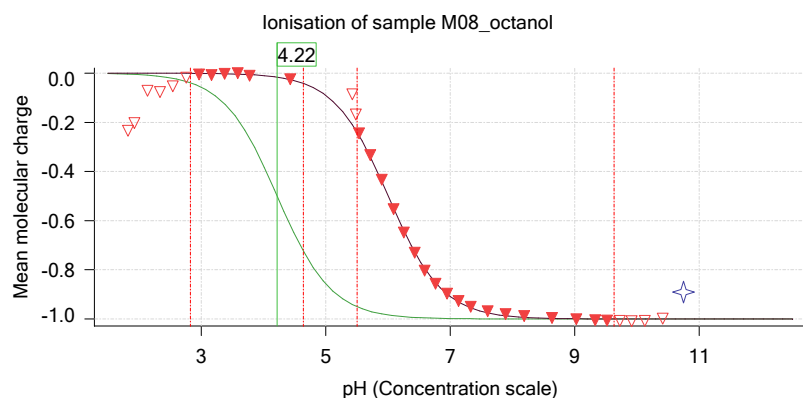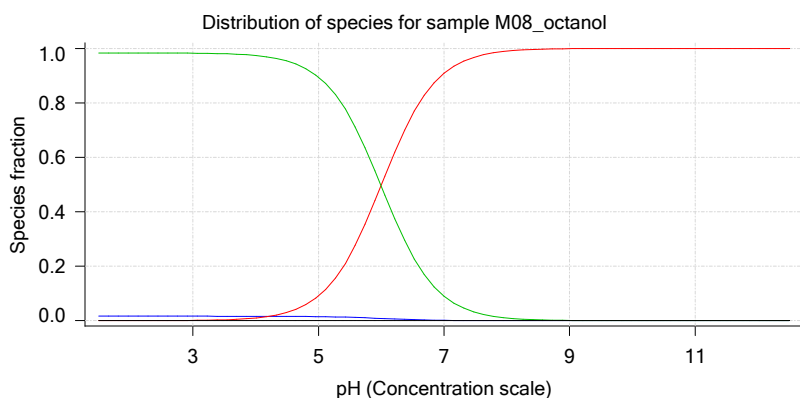

Sample name: **M08\_octanol**  
Assay name: **pH-metric high logP**  
Assay ID: **18C-02007**  
Filename: **C:\Sirius\_T3\Mehtap\20180302\_exp29\_logP\_T3-2\18C-02007\_M08\_octanol\_pH-metric high logP.t3r**

Experiment start time: **3/2/2018 5:10:52 PM**  
Analyst: **Pion**  
Instrument ID: **T312060**

## Sample graphs (continued)

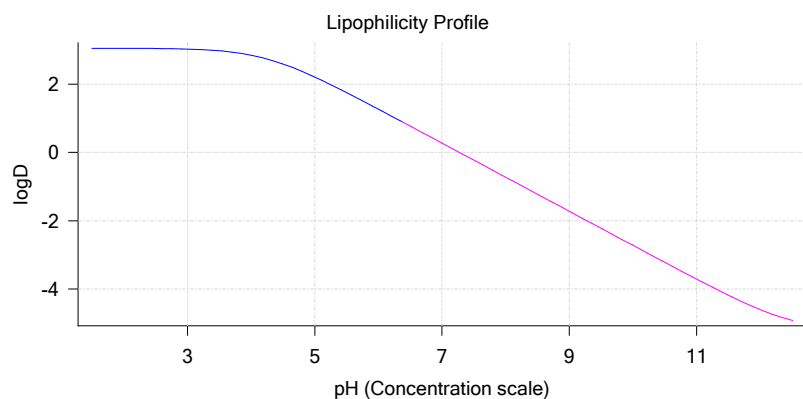

## Sample logD and percent species

| pH     | M08_octanol<br>logD | M08_octanol<br>M08_octanolH | M08_octanol<br>M08_octanolH | M08_octanol<br>M08_octanolH* | M08_octanol<br>M08_octanol* | Comment    |
|--------|---------------------|-----------------------------|-----------------------------|------------------------------|-----------------------------|------------|
| 1.000  | 3.05                | 1.65 %                      | 0.00 %                      | 98.35 %                      | 0.00 %                      |            |
| 1.200  | 3.05                | 1.65 %                      | 0.00 %                      | 98.35 %                      | 0.00 %                      | Stomach pH |
| 2.000  | 3.05                | 1.65 %                      | 0.01 %                      | 98.34 %                      | 0.00 %                      |            |
| 3.000  | 3.03                | 1.65 %                      | 0.10 %                      | 98.26 %                      | 0.00 %                      |            |
| 4.000  | 2.85                | 1.63 %                      | 0.98 %                      | 97.39 %                      | 0.00 %                      |            |
| 5.000  | 2.21                | 1.50 %                      | 9.03 %                      | 89.48 %                      | 0.00 %                      |            |
| 6.000  | 1.27                | 0.83 %                      | 49.80 %                     | 49.37 %                      | 0.00 %                      |            |
| 6.500  | 0.77                | 0.40 %                      | 75.83 %                     | 23.77 %                      | 0.00 %                      |            |
| 7.000  | 0.27                | 0.15 %                      | 90.84 %                     | 9.00 %                       | 0.00 %                      |            |
| 7.400  | -0.13               | 0.06 %                      | 96.14 %                     | 3.79 %                       | 0.00 %                      | Blood pH   |
| 8.000  | -0.72               | 0.02 %                      | 99.00 %                     | 0.98 %                       | 0.00 %                      |            |
| 9.000  | -1.72               | 0.00 %                      | 99.90 %                     | 0.10 %                       | 0.00 %                      |            |
| 10.000 | -2.72               | 0.00 %                      | 99.99 %                     | 0.01 %                       | 0.00 %                      |            |
| 11.000 | -3.71               | 0.00 %                      | 100.00 %                    | 0.00 %                       | 0.00 %                      |            |
| 12.000 | -4.60               | 0.00 %                      | 100.00 %                    | 0.00 %                       | 0.00 %                      |            |

## Carbonate and acidity

Carbonate 0.075 mM  
Acidity error -1.805 mM

## Other graphs

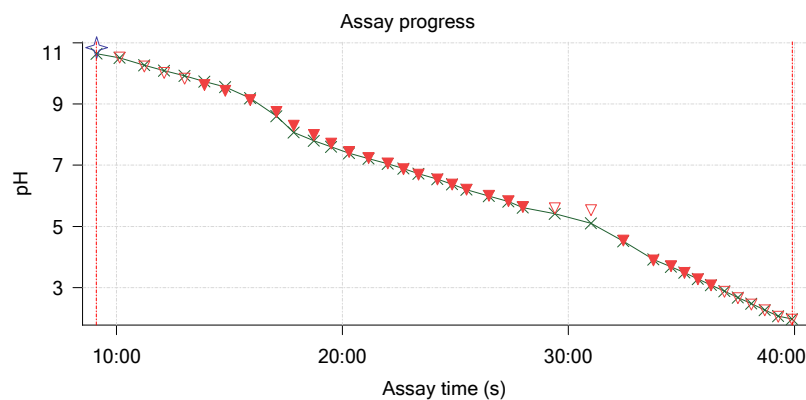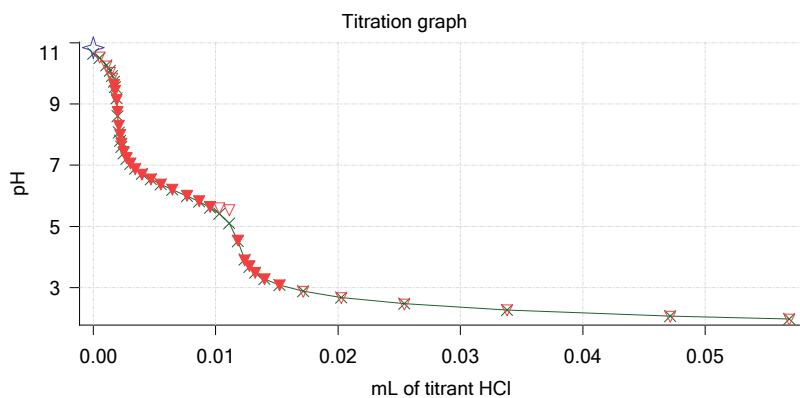

Sample name: **M08\_octanol**  
 Assay name: **pH-metric high logP**  
 Assay ID: **18C-02007**  
 Filename: **C:\Sirius\_T3\Mehtap\20180302\_exp29\_logP\_T3-2\18C-02007\_M08\_octanol\_pH-metric high logP.t3r**

Experiment start time: **3/2/2018 5:10:52 PM**  
 Analyst: **Pion**  
 Instrument ID: **T312060**

## Other graphs (continued)

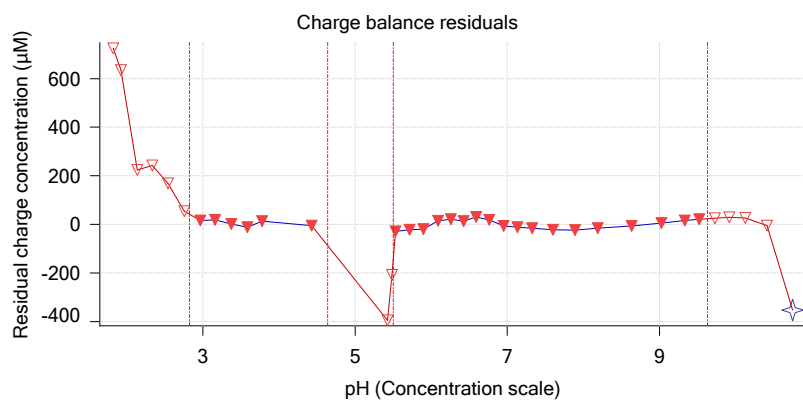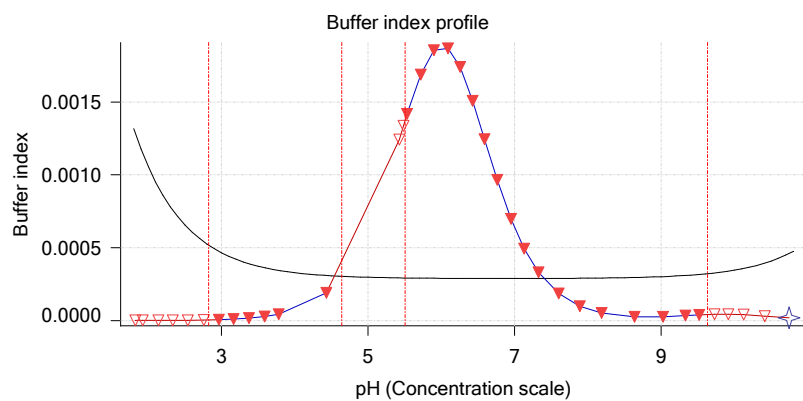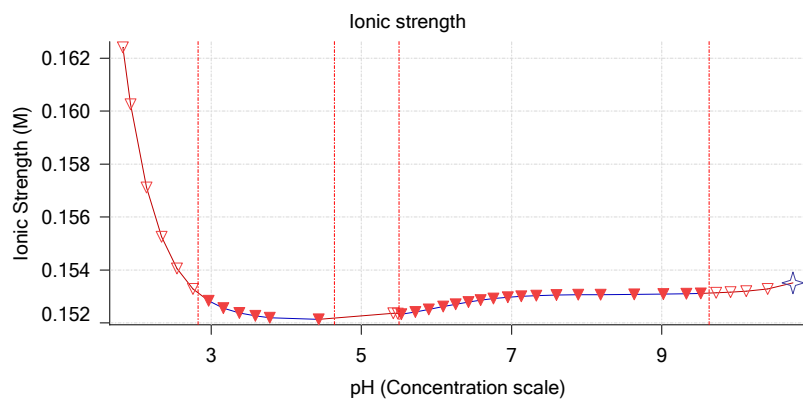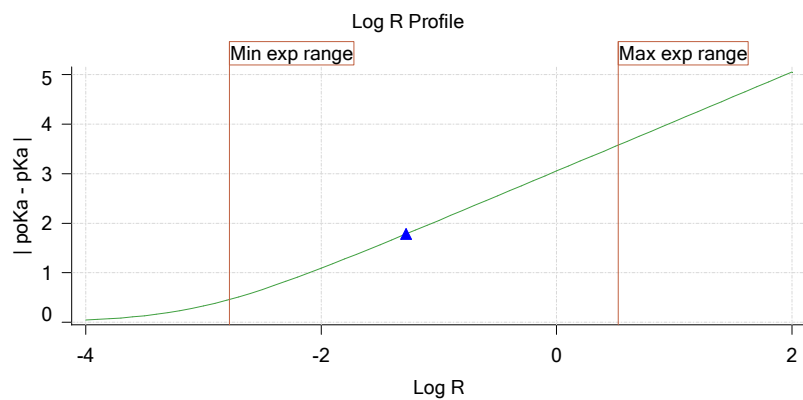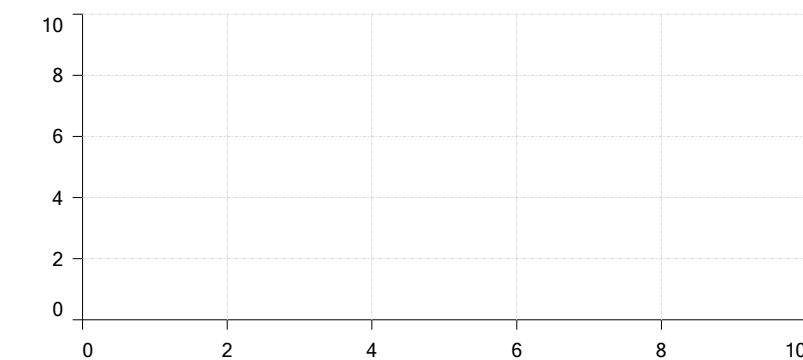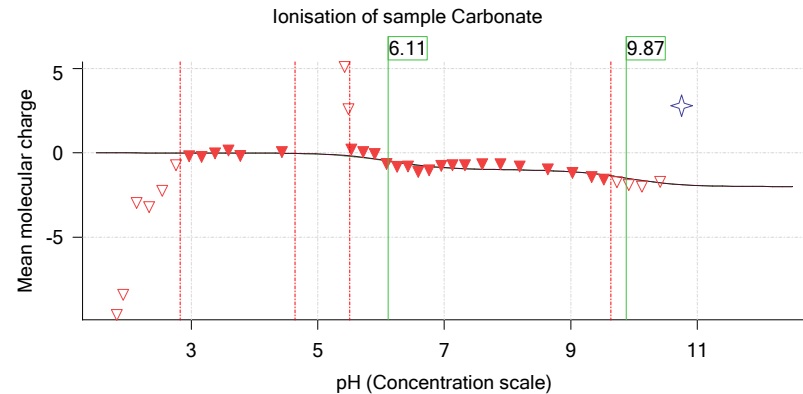

Sample name: **M08\_octanol**  
 Assay name: **pH-metric high logP**  
 Assay ID: **18C-02007**  
 Filename: **C:\Sirius\_T3\Mehtap\20180302\_exp29\_logP\_T3-2\18C-02007\_M08\_octanol\_pH-metric high logP.t3r**

Experiment start time: **3/2/2018 5:10:52 PM**  
 Analyst: **Pion**  
 Instrument ID: **T312060**

pH-metric high logP Titration 2 of 3 18C-02007 Points 39 to 77

## Overall results

RMSD 0.038  
 Average ionic strength 0.159 M  
 Average temperature 25.0°C  
 Partition ratio 0.1719 : 1  
 Analyte concentration range 2174.7 µM to 2243.9 µM  
 Total points considered 26 of 39

## Warnings and errors

Errors None  
 Warnings One or more logP values out of range  
 Excessive acidity error present

## Four-Plus parameters

Alpha 0.111 3/2/2018 5:10:52 PM C:\Sirius\_T3\HCl18C02.t3r  
 S 0.9988 3/2/2018 5:10:52 PM C:\Sirius\_T3\HCl18C02.t3r  
 jH 1.0 3/2/2018 5:10:52 PM C:\Sirius\_T3\HCl18C02.t3r  
 jOH -0.8 3/2/2018 5:10:52 PM C:\Sirius\_T3\HCl18C02.t3r

## Titrants

0.50 M HCl 0.999058 3/2/2018 5:10:52 PM C:\Sirius\_T3\HCl18C02.t3r  
 0.50 M KOH 0.999845 3/2/2018 5:10:52 PM C:\Sirius\_T3\KOH18B27.t3r

## Sample

M08\_octanol concentration factor 0.855  
 Acid pKa 1 4.22  
 logP (neutral XH) 3.00  
 logP (X -) -5.22

## Sample graphs

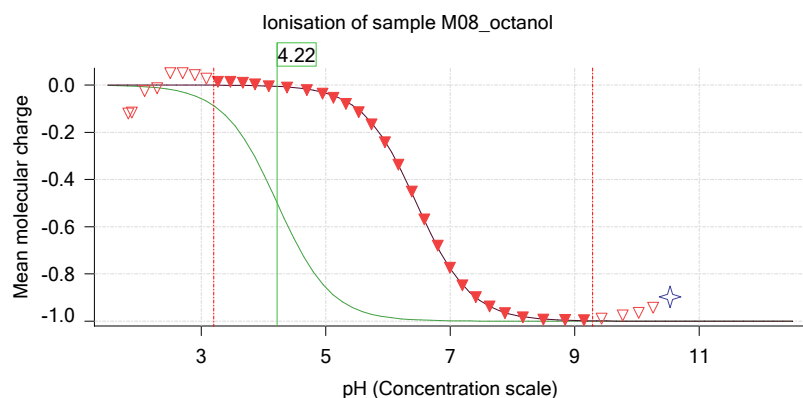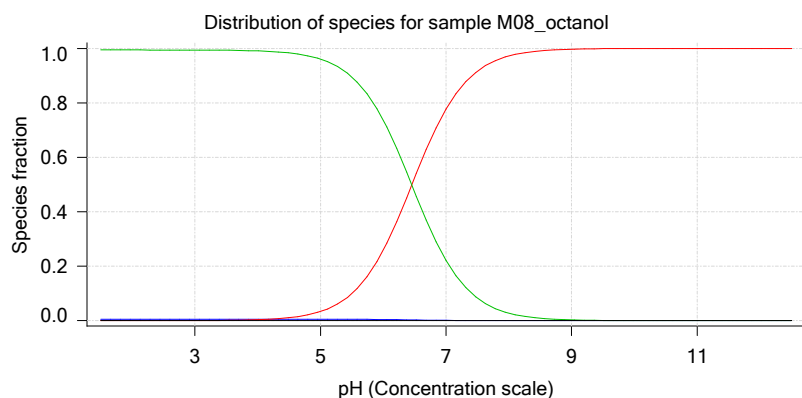

Sample name: **M08\_octanol**  
 Assay name: **pH-metric high logP**  
 Assay ID: **18C-02007**  
 Filename: **C:\Sirius\_T3\Mehtap\20180302\_exp29\_logP\_T3-2\18C-02007\_M08\_octanol\_pH-metric high logP.t3r**

Experiment start time: **3/2/2018 5:10:52 PM**  
 Analyst: **Pion**  
 Instrument ID: **T312060**

## Sample graphs (continued)

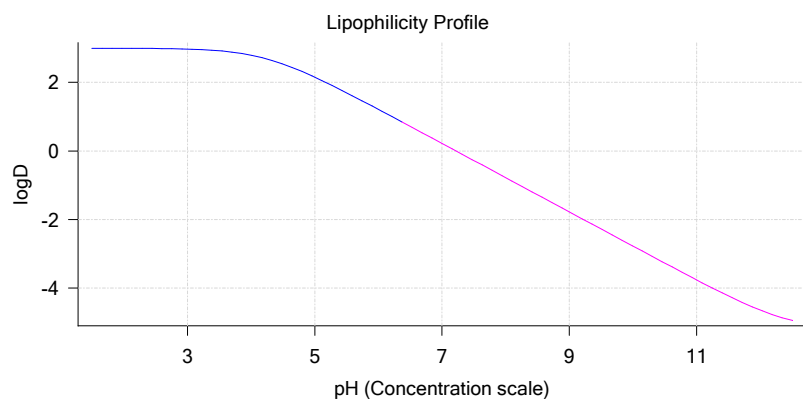

## Sample logD and percent species

| pH     | M08_octanol<br>logD | M08_octanol<br>M08_octanolH | M08_octanol<br>M08_octanolH | M08_octanol<br>M08_octanolH* | M08_octanol<br>M08_octanol* | Comment    |
|--------|---------------------|-----------------------------|-----------------------------|------------------------------|-----------------------------|------------|
| 1.000  | 3.00                | 0.58 %                      | 0.00 %                      | 99.42 %                      | 0.00 %                      | Stomach pH |
| 1.200  | 3.00                | 0.58 %                      | 0.00 %                      | 99.42 %                      | 0.00 %                      |            |
| 2.000  | 3.00                | 0.58 %                      | 0.00 %                      | 99.42 %                      | 0.00 %                      |            |
| 3.000  | 2.97                | 0.58 %                      | 0.03 %                      | 99.39 %                      | 0.00 %                      |            |
| 4.000  | 2.79                | 0.58 %                      | 0.35 %                      | 99.07 %                      | 0.00 %                      |            |
| 5.000  | 2.15                | 0.56 %                      | 3.37 %                      | 96.07 %                      | 0.00 %                      | Blood pH   |
| 6.000  | 1.21                | 0.43 %                      | 25.88 %                     | 73.69 %                      | 0.00 %                      |            |
| 6.500  | 0.72                | 0.28 %                      | 52.47 %                     | 47.25 %                      | 0.00 %                      |            |
| 7.000  | 0.22                | 0.13 %                      | 77.74 %                     | 22.14 %                      | 0.00 %                      |            |
| 7.400  | -0.18               | 0.06 %                      | 89.76 %                     | 10.18 %                      | 0.00 %                      |            |
| 8.000  | -0.78               | 0.02 %                      | 97.22 %                     | 2.77 %                       | 0.00 %                      |            |
| 9.000  | -1.78               | 0.00 %                      | 99.71 %                     | 0.28 %                       | 0.00 %                      |            |
| 10.000 | -2.78               | 0.00 %                      | 99.97 %                     | 0.03 %                       | 0.00 %                      |            |
| 11.000 | -3.77               | 0.00 %                      | 100.00 %                    | 0.00 %                       | 0.00 %                      |            |
| 12.000 | -4.65               | 0.00 %                      | 100.00 %                    | 0.00 %                       | 0.00 %                      |            |

## Carbonate and acidity

 Carbonate 0.394 mM  
 Acidity error -1.609 mM

## Other graphs

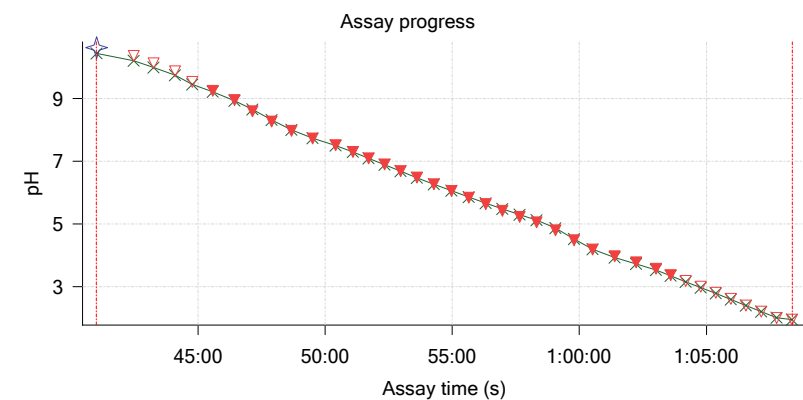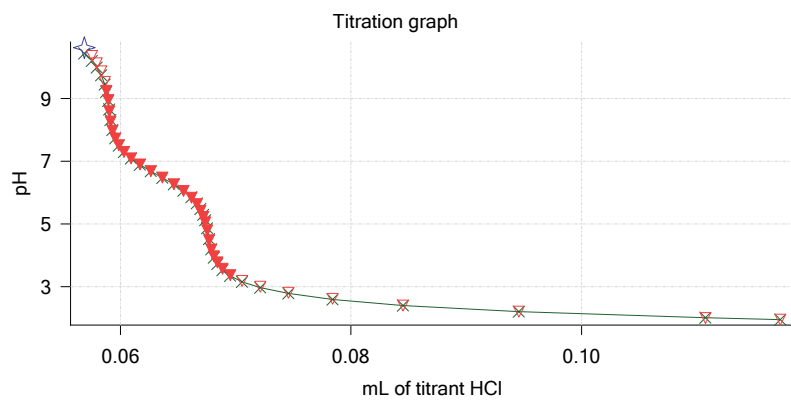



Sample name: **M08\_octanol**  
 Assay name: **pH-metric high logP**  
 Assay ID: **18C-02007**  
 Filename: **C:\Sirius\_T3\Mehtap\20180302\_exp29\_logP\_T3-2\18C-02007\_M08\_octanol\_pH-metric high logP.t3r**

Experiment start time: **3/2/2018 5:10:52 PM**  
 Analyst: **Pion**  
 Instrument ID: **T312060**

## Other graphs (continued)

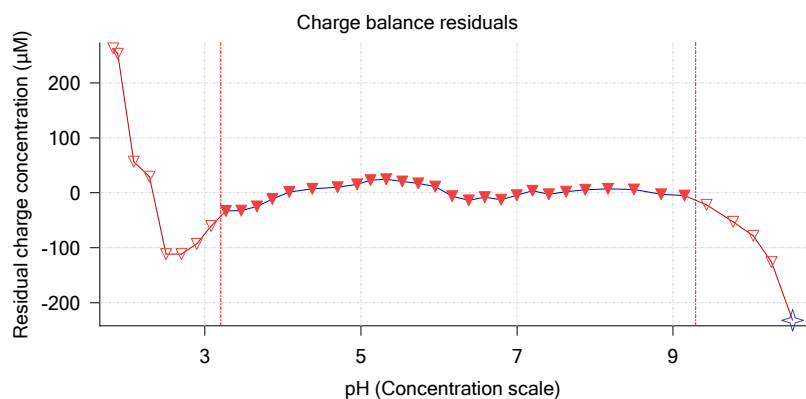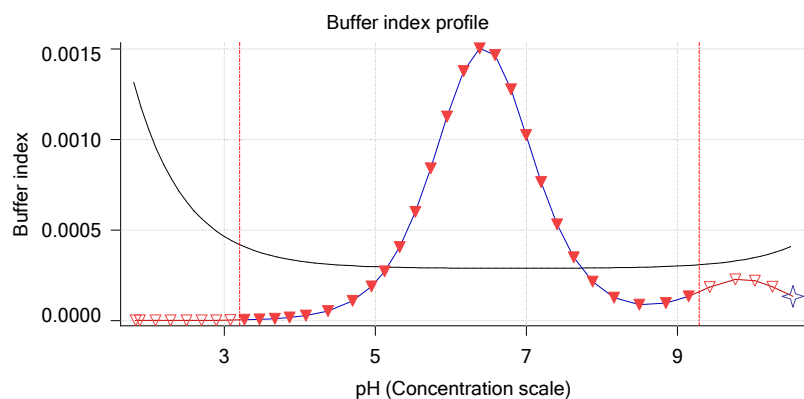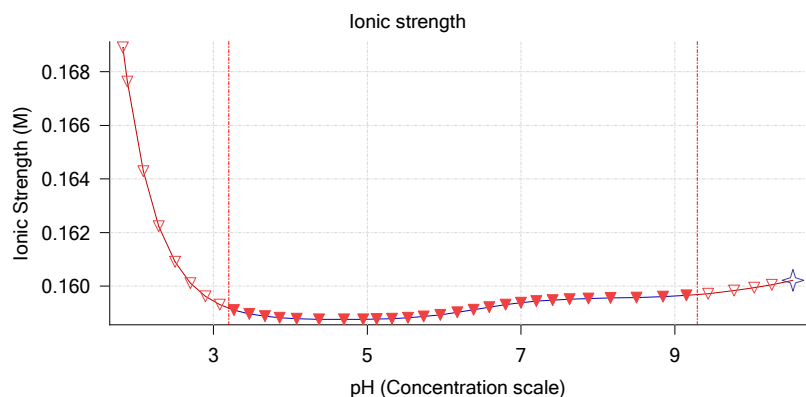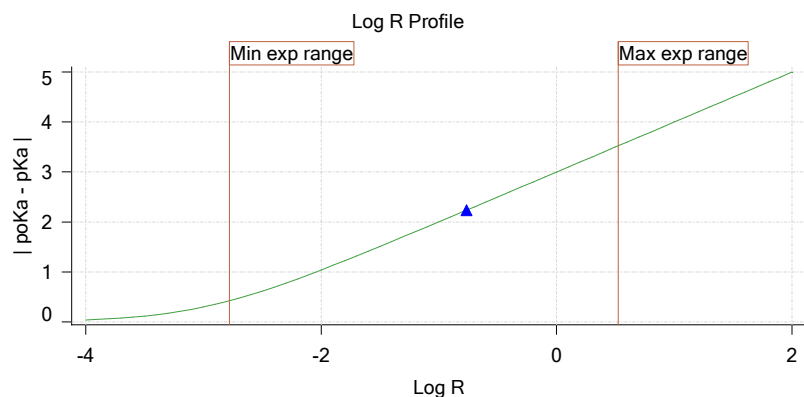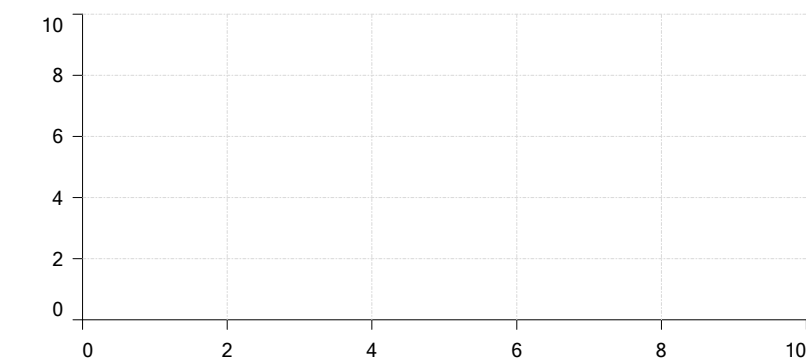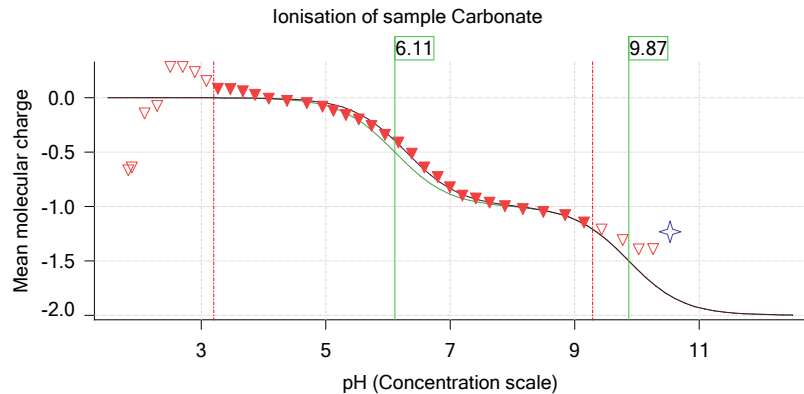

Sample name: **M08\_octanol**  
 Assay name: **pH-metric high logP**  
 Assay ID: **18C-02007**  
 Filename: **C:\Sirius\_T3\Mehtap\20180302\_exp29\_logP\_T3-2\18C-02007\_M08\_octanol\_pH-metric high logP.t3r**

Experiment start time: **3/2/2018 5:10:52 PM**  
 Analyst: **Pion**  
 Instrument ID: **T312060**

pH-metric high logP Titration 3 of 3 18C-02007 Points 78 to 114

## Overall results

RMSD 0.046  
 Average ionic strength 0.165 M  
 Average temperature 25.0°C  
 Partition ratio 0.6178 : 1  
 Analyte concentration range 1479.7 µM to 1511.5 µM  
 Total points considered 30 of 37

## Warnings and errors

Errors None  
 Warnings One or more logP values out of range  
 Excessive acidity error present

## Four-Plus parameters

Alpha 0.111 3/2/2018 5:10:52 PM C:\Sirius\_T3\HCl18C02.t3r  
 S 0.9988 3/2/2018 5:10:52 PM C:\Sirius\_T3\HCl18C02.t3r  
 jH 1.0 3/2/2018 5:10:52 PM C:\Sirius\_T3\HCl18C02.t3r  
 jOH -0.8 3/2/2018 5:10:52 PM C:\Sirius\_T3\HCl18C02.t3r

## Titrants

0.50 M HCl 0.999058 3/2/2018 5:10:52 PM C:\Sirius\_T3\HCl18C02.t3r  
 0.50 M KOH 0.999845 3/2/2018 5:10:52 PM C:\Sirius\_T3\KOH18B27.t3r

## Sample

M08\_octanol concentration factor 0.850  
 Acid pKa 1 4.22  
 logP (neutral XH) 2.97  
 logP (X -) -6.01

## Sample graphs

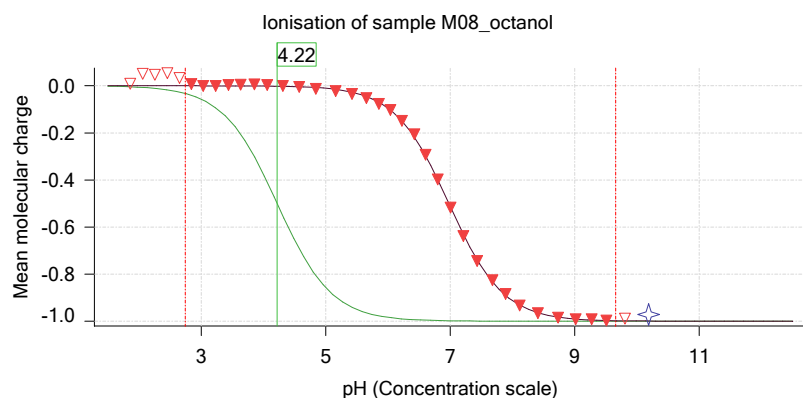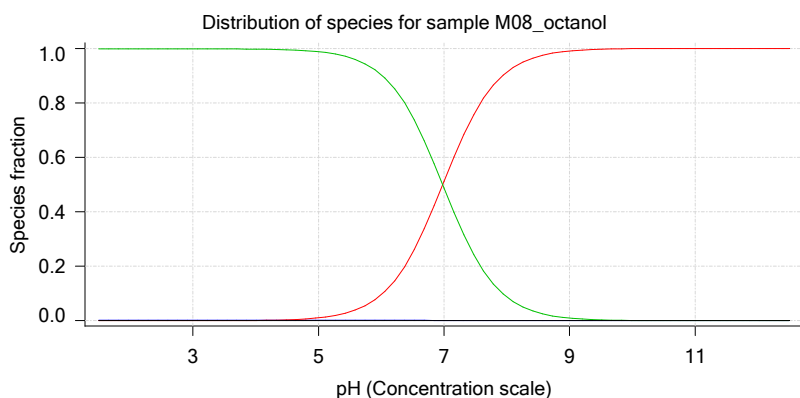

Sample name: **M08\_octanol**  
 Assay name: **pH-metric high logP**  
 Assay ID: **18C-02007**  
 Filename: **C:\Sirius\_T3\Mehtap\20180302\_exp29\_logP\_T3-2\18C-02007\_M08\_octanol\_pH-metric high logP.t3r**

Experiment start time: **3/2/2018 5:10:52 PM**  
 Analyst: **Pion**  
 Instrument ID: **T312060**

## Sample graphs (continued)

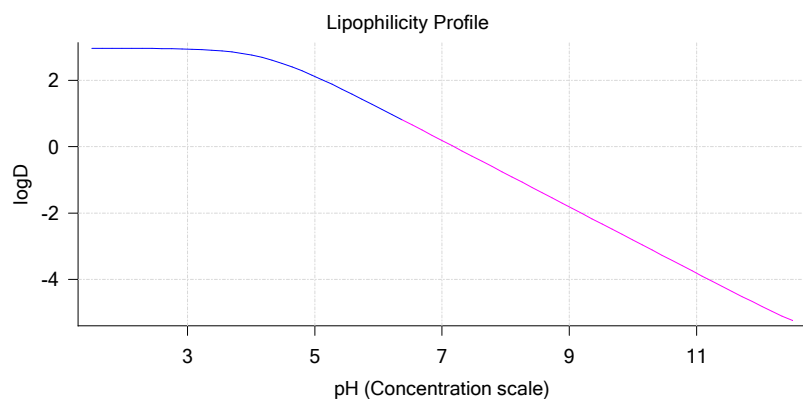

## Sample logD and percent species

| pH     | M08_octanol<br>logD | M08_octanol<br>M08_octanolH | M08_octanol<br>M08_octanolH | M08_octanol<br>M08_octanolH* | M08_octanol<br>M08_octanol* | Comment |
|--------|---------------------|-----------------------------|-----------------------------|------------------------------|-----------------------------|---------|
| 1.000  | 2.97                | 0.17 %                      | 0.00 %                      | 99.83 %                      | 0.00 %                      |         |
| 1.200  | 2.97                | 0.17 %                      | 0.00 %                      | 99.83 %                      | 0.00 %                      |         |
| 2.000  | 2.96                | 0.17 %                      | 0.00 %                      | 99.82 %                      | 0.00 %                      |         |
| 3.000  | 2.94                | 0.17 %                      | 0.01 %                      | 99.82 %                      | 0.00 %                      |         |
| 4.000  | 2.76                | 0.17 %                      | 0.10 %                      | 99.72 %                      | 0.00 %                      |         |
| 5.000  | 2.12                | 0.17 %                      | 1.04 %                      | 98.79 %                      | 0.00 %                      |         |
| 6.000  | 1.18                | 0.16 %                      | 9.50 %                      | 90.34 %                      | 0.00 %                      |         |
| 6.500  | 0.68                | 0.13 %                      | 24.93 %                     | 74.94 %                      | 0.00 %                      |         |
| 7.000  | 0.19                | 0.09 %                      | 51.23 %                     | 48.69 %                      | 0.00 %                      |         |
| 7.400  | -0.21               | 0.05 %                      | 72.51 %                     | 27.44 %                      | 0.00 %                      |         |
| 8.000  | -0.81               | 0.02 %                      | 91.31 %                     | 8.68 %                       | 0.00 %                      |         |
| 9.000  | -1.81               | 0.00 %                      | 99.06 %                     | 0.94 %                       | 0.00 %                      |         |
| 10.000 | -2.81               | 0.00 %                      | 99.90 %                     | 0.09 %                       | 0.00 %                      |         |
| 11.000 | -3.81               | 0.00 %                      | 99.99 %                     | 0.01 %                       | 0.00 %                      |         |
| 12.000 | -4.79               | 0.00 %                      | 100.00 %                    | 0.00 %                       | 0.00 %                      |         |

## Carbonate and acidity

Carbonate 0.394 mM  
 Acidity error -1.483 mM

## Other graphs

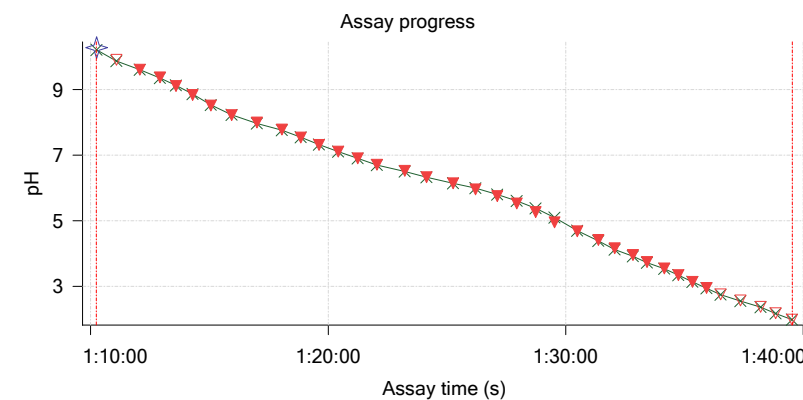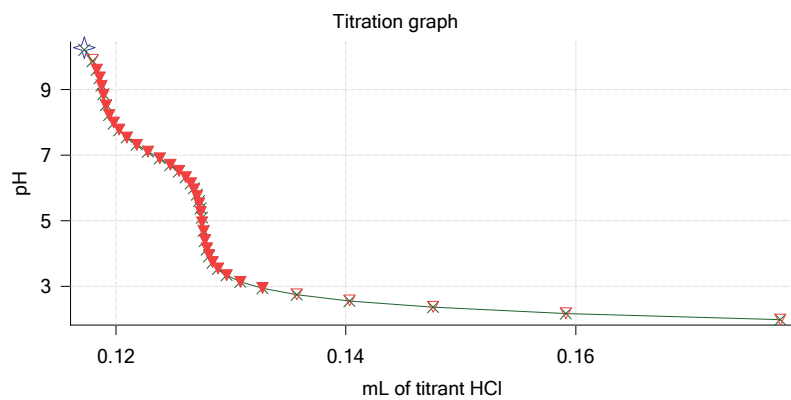

Sample name: **M08\_octanol**  
 Assay name: **pH-metric high logP**  
 Assay ID: **18C-02007**  
 Filename: **C:\Sirius\_T3\Mehtap\20180302\_exp29\_logP\_T3-2\18C-02007\_M08\_octanol\_pH-metric high logP.t3r**

Experiment start time: **3/2/2018 5:10:52 PM**  
 Analyst: **Pion**  
 Instrument ID: **T312060**

## Other graphs (continued)

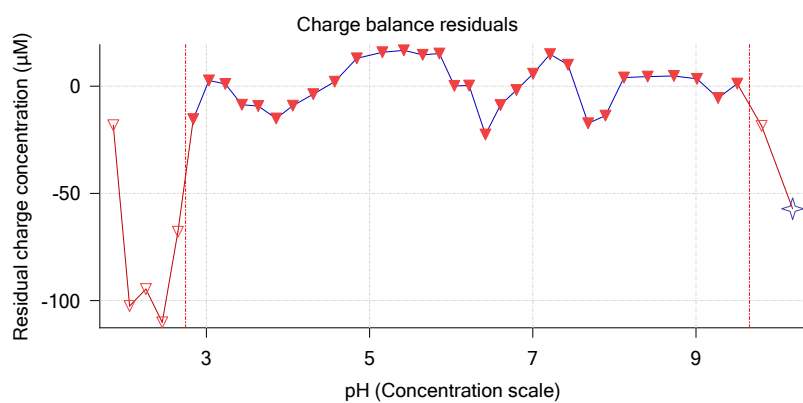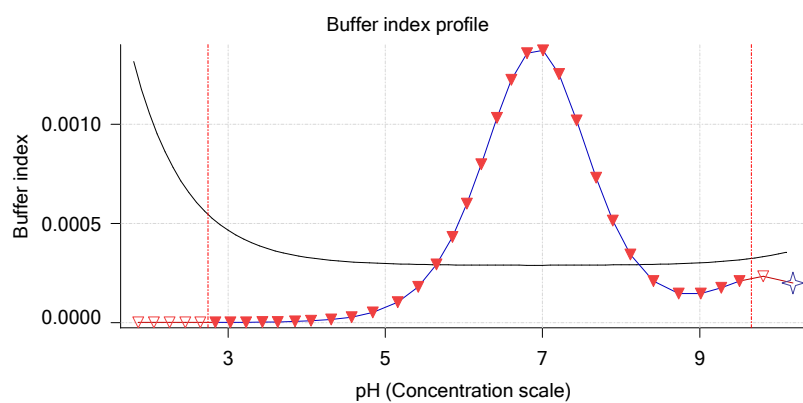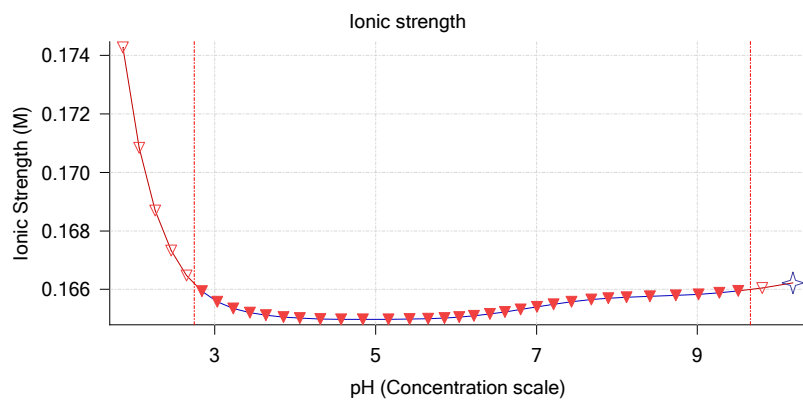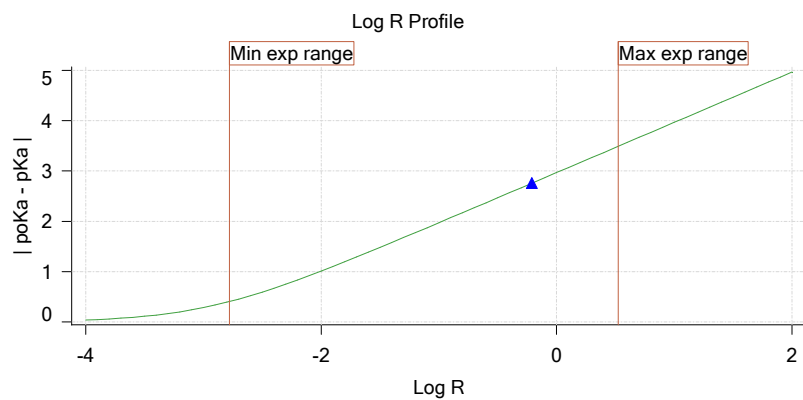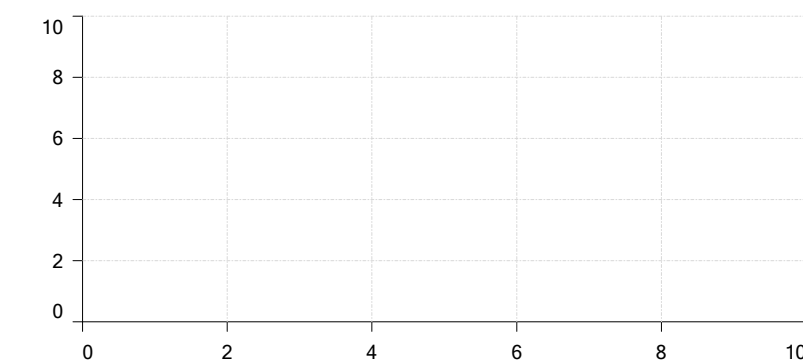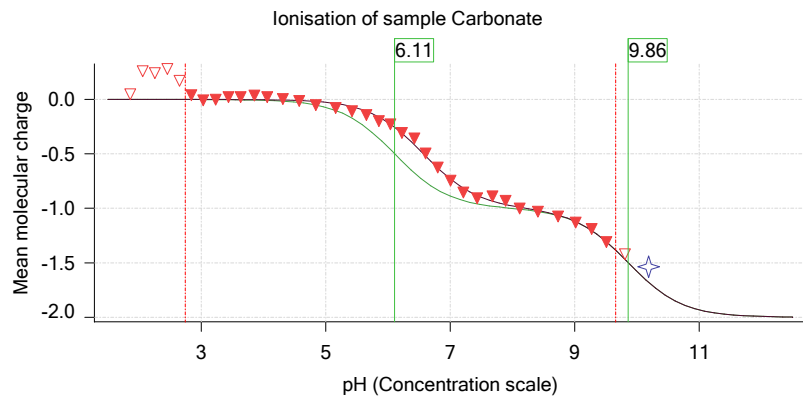

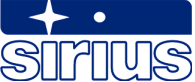

## Assay model

Sample name: **M08\_octanol** Experiment start time: **3/2/2018 5:10:52 PM**  
Assay name: **pH-metric high logP** Analyst: **Pion**  
Assay ID: **18C-02007** Instrument ID: **T312060**  
Filename: **C:\Sirius\_T3\Mehtap\20180302\_exp29\_logP\_T3-2\18C-02007\_M08\_octanol\_pH-metric high logP.t3r**

## Assay Model

| Settings                          | Value        | Date/Time changed    | Imported from      |
|-----------------------------------|--------------|----------------------|--------------------|
| Sample name                       | M08_octanol  | 2/27/2018 4:33:51 PM | User entered value |
| Sample by                         | Weight       |                      | Default value      |
| Sample weight                     | 0.001250 g   | 3/2/2018 5:08:08 PM  | User entered value |
| Formula weight                    | 293.32 g/mol | 2/27/2018 4:33:51 PM | User entered value |
| Solubility                        | Unknown      |                      | Default value      |
| Molecular weight                  | 293.32       | 2/27/2018 4:33:51 PM | User entered value |
| Individual pKa ionic environments | No           |                      | Default value      |
| Number of pKas                    | 1            | 2/27/2018 4:33:51 PM | User entered value |
| Sample is a                       | Acid         | 2/27/2018 4:33:51 PM | User entered value |
| pKa 1                             | 4.22         | 2/27/2018 4:33:51 PM | User entered value |
| logP (neutral XH)                 | 2.98         | 3/2/2018 3:22:58 PM  | User entered value |
| logP (X -)                        | -5.22        | 3/2/2018 3:23:03 PM  | User entered value |

## Events

| Time    | Event                  | Water      | Acid       | Base       | Octanol    | pH     | dpH/dt   | pH R-squared | pH SD   | dpH time |
|---------|------------------------|------------|------------|------------|------------|--------|----------|--------------|---------|----------|
| 6:14.2  | Manual volume addition |            |            |            | 0.08000 mL |        |          |              |         |          |
| 6:15.3  | Initial pH = 5.74      |            |            |            |            |        |          |              |         |          |
| 9:07.3  | Data point 2           | 1.50000 mL | 0.00000 mL | 0.00647 mL | 0.08000 mL | 10.845 | -0.01910 | 0.96118      | 0.00097 | 34.5 s   |
| 10:08.5 | Data point 3           | 1.50000 mL | 0.00052 mL | 0.00647 mL | 0.08000 mL | 10.511 | 0.01702  | 0.82617      | 0.00093 | 35.0 s   |
| 11:14.1 | Data point 4           | 1.50000 mL | 0.00108 mL | 0.00647 mL | 0.08000 mL | 10.223 | -0.01634 | 0.68740      | 0.00097 | 27.0 s   |
| 12:06.6 | Data point 5           | 1.50000 mL | 0.00136 mL | 0.00647 mL | 0.08000 mL | 10.016 | -0.01334 | 0.51589      | 0.00092 | 28.5 s   |
| 13:00.5 | Data point 6           | 1.50000 mL | 0.00155 mL | 0.00647 mL | 0.08000 mL | 9.825  | -0.01728 | 0.80734      | 0.00095 | 28.0 s   |
| 13:53.9 | Data point 7           | 1.50000 mL | 0.00169 mL | 0.00647 mL | 0.08000 mL | 9.619  | -0.01617 | 0.77696      | 0.00091 | 29.5 s   |
| 14:48.8 | Data point 8           | 1.50000 mL | 0.00179 mL | 0.00647 mL | 0.08000 mL | 9.430  | -0.01709 | 0.89746      | 0.00089 | 30.5 s   |
| 15:54.8 | Data point 9           | 1.50000 mL | 0.00190 mL | 0.00647 mL | 0.08000 mL | 9.124  | -0.01954 | 0.95895      | 0.00100 | 34.0 s   |
| 17:04.8 | Data point 10          | 1.50000 mL | 0.00200 mL | 0.00647 mL | 0.08000 mL | 8.735  | 0.01424  | 0.54643      | 0.00095 | 10.5 s   |
| 17:50.7 | Data point 11          | 1.50000 mL | 0.00209 mL | 0.00647 mL | 0.08000 mL | 8.289  | 0.01419  | 0.56162      | 0.00094 | 17.5 s   |
| 18:43.8 | Data point 12          | 1.50000 mL | 0.00219 mL | 0.00647 mL | 0.08000 mL | 7.989  | 0.01768  | 0.82202      | 0.00096 | 16.0 s   |
| 19:30.3 | Data point 13          | 1.50000 mL | 0.00230 mL | 0.00647 mL | 0.08000 mL | 7.701  | 0.01538  | 0.74821      | 0.00089 | 17.0 s   |
| 20:17.7 | Data point 14          | 1.50000 mL | 0.00249 mL | 0.00647 mL | 0.08000 mL | 7.430  | 0.01705  | 0.74628      | 0.00097 | 16.0 s   |
| 21:09.3 | Data point 15          | 1.50000 mL | 0.00273 mL | 0.00647 mL | 0.08000 mL | 7.233  | 0.01759  | 0.83369      | 0.00095 | 16.0 s   |
| 22:00.8 | Data point 16          | 1.50000 mL | 0.00303 mL | 0.00647 mL | 0.08000 mL | 7.053  | 0.01636  | 0.81366      | 0.00091 | 15.5 s   |
| 22:41.9 | Data point 17          | 1.50000 mL | 0.00343 mL | 0.00647 mL | 0.08000 mL | 6.864  | 0.01785  | 0.82800      | 0.00097 | 15.0 s   |
| 23:22.4 | Data point 18          | 1.50000 mL | 0.00397 mL | 0.00647 mL | 0.08000 mL | 6.692  | 0.01764  | 0.77148      | 0.00099 | 14.0 s   |
| 24:12.1 | Data point 19          | 1.50000 mL | 0.00470 mL | 0.00647 mL | 0.08000 mL | 6.530  | 0.01783  | 0.78830      | 0.00099 | 13.5 s   |
| 24:51.2 | Data point 20          | 1.50000 mL | 0.00553 mL | 0.00647 mL | 0.08000 mL | 6.359  | 0.01727  | 0.78473      | 0.00097 | 13.0 s   |

Sample name: **M08\_octanol** Experiment start time: **3/2/2018 5:10:52 PM**  
 Assay name: **pH-metric high logP** Analyst: **Pion**  
 Assay ID: **18C-02007** Instrument ID: **T312060**  
 Filename: **C:\Sirius\_T3\Mehtap\20180302\_exp29\_logP\_T3-2\18C-02007\_M08\_octanol\_pH-metric high logP.t3r**

## Events (continued)

| Time      | Event         | Water      | Acid       | Base       | Octanol    | pH     | dpH/dt   | pH R-squared | pH SD   | dpH/dt time         |
|-----------|---------------|------------|------------|------------|------------|--------|----------|--------------|---------|---------------------|
| 25:29.8   | Data point 21 | 1.50000 mL | 0.00647 mL | 0.00647 mL | 0.08000 mL | 6.192  | 0.01558  | 0.76055      | 0.00089 | 13.0 s              |
| 26:28.7   | Data point 22 | 1.50000 mL | 0.00767 mL | 0.00647 mL | 0.08000 mL | 6.001  | 0.01489  | 0.64323      | 0.00092 | 11.0 s              |
| 27:20.5   | Data point 23 | 1.50000 mL | 0.00865 mL | 0.00647 mL | 0.08000 mL | 5.821  | 0.01662  | 0.89411      | 0.00087 | 13.0 s              |
| 27:58.9   | Data point 24 | 1.50000 mL | 0.00955 mL | 0.00647 mL | 0.08000 mL | 5.637  | 0.05313  | 0.99810      | 0.00262 | Timed out at 59.0 s |
| 29:24.2   | Data point 25 | 1.50000 mL | 0.01030 mL | 0.00647 mL | 0.08000 mL | 5.588  | 0.13136  | 0.99843      | 0.00649 | Timed out at 59.5 s |
| 31:00.0   | Data point 26 | 1.50000 mL | 0.01110 mL | 0.00647 mL | 0.08000 mL | 5.531  | 0.09941  | 0.99750      | 0.00492 | Timed out at 59.5 s |
| 32:25.5   | Data point 27 | 1.50000 mL | 0.01183 mL | 0.00647 mL | 0.08000 mL | 4.537  | 0.01986  | 0.98034      | 0.00099 | 49.0 s              |
| 33:45.2   | Data point 28 | 1.50000 mL | 0.01237 mL | 0.00647 mL | 0.08000 mL | 3.885  | 0.01681  | 0.92569      | 0.00086 | 11.5 s              |
| 34:32.4   | Data point 29 | 1.50000 mL | 0.01275 mL | 0.00647 mL | 0.08000 mL | 3.693  | 0.00140  | 0.02989      | 0.00040 | 10.0 s              |
| 35:08.0   | Data point 30 | 1.50000 mL | 0.01322 mL | 0.00647 mL | 0.08000 mL | 3.482  | 0.01095  | 0.91600      | 0.00057 | 10.0 s              |
| 35:43.5   | Data point 31 | 1.50000 mL | 0.01399 mL | 0.00647 mL | 0.08000 mL | 3.270  | 0.00378  | 0.79588      | 0.00021 | 10.0 s              |
| 36:19.0   | Data point 32 | 1.50000 mL | 0.01522 mL | 0.00647 mL | 0.08000 mL | 3.073  | -0.00000 | 0.00000      | 0.00009 | 10.0 s              |
| 36:54.5   | Data point 33 | 1.50000 mL | 0.01714 mL | 0.00647 mL | 0.08000 mL | 2.866  | -0.00657 | 0.26783      | 0.00063 | 10.0 s              |
| 37:30.0   | Data point 34 | 1.50000 mL | 0.02027 mL | 0.00647 mL | 0.08000 mL | 2.651  | -0.00505 | 0.84244      | 0.00027 | 10.0 s              |
| 38:05.6   | Data point 35 | 1.50000 mL | 0.02542 mL | 0.00647 mL | 0.08000 mL | 2.448  | -0.00911 | 0.70428      | 0.00054 | 10.0 s              |
| 38:41.2   | Data point 36 | 1.50000 mL | 0.03380 mL | 0.00647 mL | 0.08000 mL | 2.253  | -0.00829 | 0.95487      | 0.00042 | 10.5 s              |
| 39:17.3   | Data point 37 | 1.50000 mL | 0.04713 mL | 0.00647 mL | 0.08000 mL | 2.045  | -0.00957 | 0.94345      | 0.00049 | 10.5 s              |
| 39:53.4   | Data point 38 | 1.50000 mL | 0.05687 mL | 0.00647 mL | 0.08000 mL | 1.947  | -0.01349 | 0.79563      | 0.00075 | 10.0 s              |
| 41:01.1   | Data point 39 | 1.50000 mL | 0.05687 mL | 0.06235 mL | 0.28000 mL | 10.631 | -0.01759 | 0.84525      | 0.00094 | 46.5 s              |
| 42:28.5   | Data point 40 | 1.50000 mL | 0.05753 mL | 0.06235 mL | 0.28000 mL | 10.359 | -0.01582 | 0.80255      | 0.00087 | 21.0 s              |
| 43:14.9   | Data point 41 | 1.50000 mL | 0.05795 mL | 0.06235 mL | 0.28000 mL | 10.128 | -0.01731 | 0.77064      | 0.00098 | 20.5 s              |
| 44:06.0   | Data point 42 | 1.50000 mL | 0.05833 mL | 0.06235 mL | 0.28000 mL | 9.868  | -0.01482 | 0.86960      | 0.00079 | 10.0 s              |
| 44:46.6   | Data point 43 | 1.50000 mL | 0.05863 mL | 0.06235 mL | 0.28000 mL | 9.530  | 0.01648  | 0.70393      | 0.00097 | 18.0 s              |
| 45:35.3   | Data point 44 | 1.50000 mL | 0.05880 mL | 0.06235 mL | 0.28000 mL | 9.248  | 0.00953  | 0.92650      | 0.00049 | 10.0 s              |
| 46:26.1   | Data point 45 | 1.50000 mL | 0.05894 mL | 0.06235 mL | 0.28000 mL | 8.947  | 0.01716  | 0.79689      | 0.00095 | 12.0 s              |
| 47:08.7   | Data point 46 | 1.50000 mL | 0.05903 mL | 0.06235 mL | 0.28000 mL | 8.599  | 0.01796  | 0.79610      | 0.00099 | 15.0 s              |
| 47:54.2   | Data point 47 | 1.50000 mL | 0.05915 mL | 0.06235 mL | 0.28000 mL | 8.266  | 0.01550  | 0.73917      | 0.00089 | 16.0 s              |
| 48:40.8   | Data point 48 | 1.50000 mL | 0.05931 mL | 0.06235 mL | 0.28000 mL | 7.978  | 0.01748  | 0.85525      | 0.00093 | 14.5 s              |
| 49:30.9   | Data point 49 | 1.50000 mL | 0.05955 mL | 0.06235 mL | 0.28000 mL | 7.732  | 0.01742  | 0.81873      | 0.00095 | 13.5 s              |
| 50:25.3   | Data point 50 | 1.50000 mL | 0.05988 mL | 0.06235 mL | 0.28000 mL | 7.511  | 0.01772  | 0.84280      | 0.00095 | 15.0 s              |
| 51:05.7   | Data point 51 | 1.50000 mL | 0.06030 mL | 0.06235 mL | 0.28000 mL | 7.300  | 0.01794  | 0.80992      | 0.00098 | 12.0 s              |
| 51:43.1   | Data point 52 | 1.50000 mL | 0.06091 mL | 0.06235 mL | 0.28000 mL | 7.099  | 0.01591  | 0.80910      | 0.00087 | 12.0 s              |
| 52:20.5   | Data point 53 | 1.50000 mL | 0.06169 mL | 0.06235 mL | 0.28000 mL | 6.900  | 0.01723  | 0.80221      | 0.00095 | 12.5 s              |
| 52:58.5   | Data point 54 | 1.50000 mL | 0.06263 mL | 0.06235 mL | 0.28000 mL | 6.688  | 0.01881  | 0.86957      | 0.00100 | 12.5 s              |
| 53:36.4   | Data point 55 | 1.50000 mL | 0.06364 mL | 0.06235 mL | 0.28000 mL | 6.485  | 0.01949  | 0.96513      | 0.00098 | 14.5 s              |
| 54:16.5   | Data point 56 | 1.50000 mL | 0.06463 mL | 0.06235 mL | 0.28000 mL | 6.272  | 0.01746  | 0.81817      | 0.00095 | 16.0 s              |
| 54:58.0   | Data point 57 | 1.50000 mL | 0.06548 mL | 0.06235 mL | 0.28000 mL | 6.054  | 0.01509  | 0.72773      | 0.00087 | 15.5 s              |
| 55:38.9   | Data point 58 | 1.50000 mL | 0.06616 mL | 0.06235 mL | 0.28000 mL | 5.836  | 0.01598  | 0.67878      | 0.00096 | 14.5 s              |
| 56:18.8   | Data point 59 | 1.50000 mL | 0.06663 mL | 0.06235 mL | 0.28000 mL | 5.633  | 0.01711  | 0.75074      | 0.00098 | 14.5 s              |
| 56:58.7   | Data point 60 | 1.50000 mL | 0.06696 mL | 0.06235 mL | 0.28000 mL | 5.426  | 0.01163  | 0.43580      | 0.00087 | 15.0 s              |
| 57:39.1   | Data point 61 | 1.50000 mL | 0.06719 mL | 0.06235 mL | 0.28000 mL | 5.227  | 0.01748  | 0.74548      | 0.00100 | 14.5 s              |
| 58:19.1   | Data point 62 | 1.50000 mL | 0.06736 mL | 0.06235 mL | 0.28000 mL | 5.053  | 0.01418  | 0.59508      | 0.00091 | 14.0 s              |
| 59:03.7   | Data point 63 | 1.50000 mL | 0.06752 mL | 0.06235 mL | 0.28000 mL | 4.804  | 0.01416  | 0.51436      | 0.00098 | 13.0 s              |
| 59:47.2   | Data point 64 | 1.50000 mL | 0.06769 mL | 0.06235 mL | 0.28000 mL | 4.481  | -0.01418 | 0.54917      | 0.00095 | 13.5 s              |
| 1:00:31.3 | Data point 65 | 1.50000 mL | 0.06787 mL | 0.06235 mL | 0.28000 mL | 4.188  | 0.00796  | 0.27623      | 0.00075 | 11.5 s              |
| 1:01:23.6 | Data point 66 | 1.50000 mL | 0.06811 mL | 0.06235 mL | 0.28000 mL | 3.970  | 0.00985  | 0.32707      | 0.00085 | 10.0 s              |
| 1:02:14.3 | Data point 67 | 1.50000 mL | 0.06841 mL | 0.06235 mL | 0.28000 mL | 3.775  | 0.00616  | 0.11203      | 0.00091 | 10.5 s              |
| 1:03:00.6 | Data point 68 | 1.50000 mL | 0.06886 mL | 0.06235 mL | 0.28000 mL | 3.573  | -0.00222 | 0.09420      | 0.00036 | 10.0 s              |
| 1:03:36.0 | Data point 69 | 1.50000 mL | 0.06952 mL | 0.06235 mL | 0.28000 mL | 3.375  | -0.00763 | 0.55206      | 0.00051 | 10.0 s              |
| 1:04:11.4 | Data point 70 | 1.50000 mL | 0.07056 mL | 0.06235 mL | 0.28000 mL | 3.190  | -0.00162 | 0.01741      | 0.00061 | 10.0 s              |
| 1:04:46.9 | Data point 71 | 1.50000 mL | 0.07213 mL | 0.06235 mL | 0.28000 mL | 3.003  | -0.00478 | 0.16896      | 0.00058 | 10.0 s              |
| 1:05:22.5 | Data point 72 | 1.50000 mL | 0.07458 mL | 0.06235 mL | 0.28000 mL | 2.809  | -0.01075 | 0.85851      | 0.00057 | 10.0 s              |
| 1:05:57.9 | Data point 73 | 1.50000 mL | 0.07841 mL | 0.06235 mL | 0.28000 mL | 2.612  | -0.00808 | 0.55458      | 0.00054 | 10.0 s              |
| 1:06:33.4 | Data point 74 | 1.50000 mL | 0.08452 mL | 0.06235 mL | 0.28000 mL | 2.403  | -0.01513 | 0.90224      | 0.00079 | 10.5 s              |

Sample name: **M08\_octanol**  
 Assay name: **pH-metric high logP**  
 Assay ID: **18C-02007**  
 Filename: **C:\Sirius\_T3\Mehtap\20180302\_exp29\_logP\_T3-2\18C-02007\_M08\_octanol\_pH-metric high logP.t3r**

Experiment start time: **3/2/2018 5:10:52 PM**  
 Analyst: **Pion**  
 Instrument ID: **T312060**

## Events (continued)

| Time      | Event          | Water      | Acid       | Base       | Octanol    | pH     | dpH/dt   | pH R-squared | pH SD   | dpH/dt time |
|-----------|----------------|------------|------------|------------|------------|--------|----------|--------------|---------|-------------|
| 1:07:09.6 | Data point 75  | 1.50000 mL | 0.09457 mL | 0.06235 mL | 0.28000 mL | 2.205  | -0.01575 | 0.80047      | 0.00087 | 10.5 s      |
| 1:07:46.0 | Data point 76  | 1.50000 mL | 0.11075 mL | 0.06235 mL | 0.28000 mL | 2.005  | -0.01140 | 0.94279      | 0.00058 | 10.0 s      |
| 1:08:21.6 | Data point 77  | 1.50000 mL | 0.11724 mL | 0.06235 mL | 0.28000 mL | 1.949  | -0.01059 | 0.59925      | 0.00068 | 10.5 s      |
| 1:10:15.2 | Data point 78  | 1.50000 mL | 0.11724 mL | 0.12227 mL | 1.08000 mL | 10.284 | -0.01559 | 0.68044      | 0.00093 | 19.0 s      |
| 1:11:04.8 | Data point 79  | 1.50000 mL | 0.11797 mL | 0.12227 mL | 1.08000 mL | 9.905  | -0.01823 | 0.85938      | 0.00097 | 29.0 s      |
| 1:12:04.4 | Data point 80  | 1.50000 mL | 0.11832 mL | 0.12227 mL | 1.08000 mL | 9.606  | 0.00322  | 0.20225      | 0.00035 | 10.0 s      |
| 1:12:55.2 | Data point 81  | 1.50000 mL | 0.11858 mL | 0.12227 mL | 1.08000 mL | 9.372  | 0.01018  | 0.33175      | 0.00087 | 10.0 s      |
| 1:13:35.8 | Data point 82  | 1.50000 mL | 0.11874 mL | 0.12227 mL | 1.08000 mL | 9.113  | 0.01675  | 0.72883      | 0.00097 | 11.5 s      |
| 1:14:17.8 | Data point 83  | 1.50000 mL | 0.11891 mL | 0.12227 mL | 1.08000 mL | 8.833  | 0.01720  | 0.72480      | 0.00100 | 15.0 s      |
| 1:15:03.3 | Data point 84  | 1.50000 mL | 0.11912 mL | 0.12227 mL | 1.08000 mL | 8.510  | 0.01867  | 0.92540      | 0.00096 | 22.0 s      |
| 1:15:55.9 | Data point 85  | 1.50000 mL | 0.11940 mL | 0.12227 mL | 1.08000 mL | 8.218  | 0.01492  | 0.63364      | 0.00092 | 23.5 s      |
| 1:17:00.2 | Data point 86  | 1.50000 mL | 0.11980 mL | 0.12227 mL | 1.08000 mL | 7.993  | 0.01343  | 0.47459      | 0.00096 | 22.0 s      |
| 1:18:03.1 | Data point 87  | 1.50000 mL | 0.12027 mL | 0.12227 mL | 1.08000 mL | 7.782  | 0.00779  | 0.17186      | 0.00093 | 22.5 s      |
| 1:18:51.0 | Data point 88  | 1.50000 mL | 0.12093 mL | 0.12227 mL | 1.08000 mL | 7.536  | 0.01513  | 0.63465      | 0.00094 | 20.5 s      |
| 1:19:36.9 | Data point 89  | 1.50000 mL | 0.12180 mL | 0.12227 mL | 1.08000 mL | 7.314  | 0.01545  | 0.64305      | 0.00095 | 23.0 s      |
| 1:20:25.4 | Data point 90  | 1.50000 mL | 0.12279 mL | 0.12227 mL | 1.08000 mL | 7.108  | 0.01486  | 0.61616      | 0.00093 | 24.0 s      |
| 1:21:14.9 | Data point 91  | 1.50000 mL | 0.12380 mL | 0.12227 mL | 1.08000 mL | 6.904  | 0.01585  | 0.65380      | 0.00097 | 23.0 s      |
| 1:22:03.3 | Data point 92  | 1.50000 mL | 0.12472 mL | 0.12227 mL | 1.08000 mL | 6.708  | 0.01765  | 0.76772      | 0.00100 | 29.0 s      |
| 1:23:13.3 | Data point 93  | 1.50000 mL | 0.12549 mL | 0.12227 mL | 1.08000 mL | 6.525  | 0.01641  | 0.69561      | 0.00097 | 29.5 s      |
| 1:24:08.2 | Data point 94  | 1.50000 mL | 0.12606 mL | 0.12227 mL | 1.08000 mL | 6.325  | 0.01752  | 0.80208      | 0.00097 | 31.5 s      |
| 1:25:15.4 | Data point 95  | 1.50000 mL | 0.12651 mL | 0.12227 mL | 1.08000 mL | 6.143  | 0.01142  | 0.37473      | 0.00092 | 31.5 s      |
| 1:26:12.4 | Data point 96  | 1.50000 mL | 0.12679 mL | 0.12227 mL | 1.08000 mL | 5.958  | 0.01161  | 0.45352      | 0.00085 | 19.0 s      |
| 1:27:07.1 | Data point 97  | 1.50000 mL | 0.12705 mL | 0.12227 mL | 1.08000 mL | 5.756  | 0.01128  | 0.44370      | 0.00084 | 18.5 s      |
| 1:27:56.1 | Data point 98  | 1.50000 mL | 0.12723 mL | 0.12227 mL | 1.08000 mL | 5.523  | 0.00514  | 0.07395      | 0.00093 | 17.5 s      |
| 1:28:44.2 | Data point 99  | 1.50000 mL | 0.12737 mL | 0.12227 mL | 1.08000 mL | 5.263  | 0.00888  | 0.39531      | 0.00070 | 17.0 s      |
| 1:29:31.7 | Data point 100 | 1.50000 mL | 0.12749 mL | 0.12227 mL | 1.08000 mL | 4.946  | 0.01013  | 0.28860      | 0.00093 | 22.0 s      |
| 1:30:29.4 | Data point 101 | 1.50000 mL | 0.12761 mL | 0.12227 mL | 1.08000 mL | 4.676  | 0.01394  | 0.55015      | 0.00093 | 17.5 s      |
| 1:31:22.6 | Data point 102 | 1.50000 mL | 0.12773 mL | 0.12227 mL | 1.08000 mL | 4.416  | 0.01242  | 0.40861      | 0.00096 | 11.0 s      |
| 1:32:04.1 | Data point 103 | 1.50000 mL | 0.12789 mL | 0.12227 mL | 1.08000 mL | 4.164  | 0.00814  | 0.19383      | 0.00091 | 10.0 s      |
| 1:32:49.9 | Data point 104 | 1.50000 mL | 0.12810 mL | 0.12227 mL | 1.08000 mL | 3.959  | 0.00234  | 0.03684      | 0.00060 | 10.0 s      |
| 1:33:25.3 | Data point 105 | 1.50000 mL | 0.12841 mL | 0.12227 mL | 1.08000 mL | 3.741  | -0.01363 | 0.76827      | 0.00077 | 18.5 s      |
| 1:34:09.1 | Data point 106 | 1.50000 mL | 0.12888 mL | 0.12227 mL | 1.08000 mL | 3.543  | -0.01018 | 0.83349      | 0.00055 | 10.0 s      |
| 1:34:44.5 | Data point 107 | 1.50000 mL | 0.12963 mL | 0.12227 mL | 1.08000 mL | 3.337  | -0.01423 | 0.90918      | 0.00074 | 10.0 s      |
| 1:35:20.0 | Data point 108 | 1.50000 mL | 0.13083 mL | 0.12227 mL | 1.08000 mL | 3.139  | -0.01823 | 0.90719      | 0.00095 | 10.0 s      |
| 1:35:55.6 | Data point 109 | 1.50000 mL | 0.13274 mL | 0.12227 mL | 1.08000 mL | 2.947  | -0.01750 | 0.91940      | 0.00090 | 10.0 s      |
| 1:36:31.1 | Data point 110 | 1.50000 mL | 0.13572 mL | 0.12227 mL | 1.08000 mL | 2.759  | -0.01737 | 0.77482      | 0.00097 | 24.5 s      |
| 1:37:21.2 | Data point 111 | 1.50000 mL | 0.14033 mL | 0.12227 mL | 1.08000 mL | 2.568  | -0.01758 | 0.81168      | 0.00096 | 25.5 s      |
| 1:38:12.4 | Data point 112 | 1.50000 mL | 0.14758 mL | 0.12227 mL | 1.08000 mL | 2.370  | -0.01653 | 0.73042      | 0.00096 | 12.0 s      |
| 1:38:50.1 | Data point 113 | 1.50000 mL | 0.15915 mL | 0.12227 mL | 1.08000 mL | 2.176  | -0.01588 | 0.71562      | 0.00093 | 15.5 s      |
| 1:39:31.5 | Data point 114 | 1.50000 mL | 0.17780 mL | 0.12227 mL | 1.08000 mL | 1.980  | -0.01565 | 0.88128      | 0.00082 | 11.5 s      |
| 1:39:52.1 | Assay volumes  | 1.50000 mL | 0.17780 mL | 0.12227 mL | 1.08000 mL |        |          |              |         |             |



Sample name: **M08\_octanol**  
 Assay name: **pH-metric high logP**  
 Assay ID: **18C-02007**  
 Filename: **C:\Sirius\_T3\Mehtap\20180302\_exp29\_logP\_T3-2\18C-02007\_M08\_octanol\_pH-metric high logP.t3r**

Experiment start time: **3/2/2018 5:10:52 PM**  
 Analyst: **Pion**  
 Instrument ID: **T312060**

## Assay Settings

| Setting                             | Value              | Original Value | Date/Time changed | Imported from |
|-------------------------------------|--------------------|----------------|-------------------|---------------|
| <b>General Settings</b>             |                    |                |                   |               |
| Analyst name                        | Pion               |                |                   |               |
| <b>Standard Experiment Settings</b> |                    |                |                   |               |
| Number of titrations                | 3                  |                |                   |               |
| Minimum pH                          | 2.000              |                |                   |               |
| Maximum pH                          | 10.000             |                |                   |               |
| pH step between points of           | 0.200              |                |                   |               |
| Minimum titrant addition            | 0.00002 mL         |                |                   |               |
| Maximum titrant addition            | 0.10000 mL         |                |                   |               |
| Argon flow rate                     | 100%               |                |                   |               |
| Start titration using               | Cautious pH adjust |                |                   |               |
| <b>Advanced General Settings</b>    |                    |                |                   |               |
| Detect turbidity using              | None               |                |                   |               |
| Collect turbidity sensor data       | No                 |                |                   |               |
| Collect UV spectra                  | No                 |                |                   |               |
| Stir after titrant addition for     | 5 seconds          |                |                   |               |
| For titrant addition, stir at       | 10%                |                |                   |               |
| <b>Titration Pre-Dose</b>           |                    |                |                   |               |
| Titration pre-dose                  | None               |                |                   |               |
| <b>Assay Medium</b>                 |                    |                |                   |               |
| ISA water volume                    | 1.50 mL            |                |                   |               |
| Water added                         | Automatic          |                |                   |               |
| Partition solvent type              | Octanol            |                |                   |               |
| Partition volume                    | 0.080 mL           |                |                   |               |
| Partition solvent added             | Manual in advance  |                |                   |               |
| After partition addition, stir for  | 1 seconds          |                |                   |               |
| <b>Sample Sonication</b>            |                    |                |                   |               |
| Sonicate                            | Yes                |                |                   |               |
| Adjust pH for sonication            | No                 |                |                   |               |
| Sonicate for                        | 120 seconds        |                |                   |               |
| After sonication stir for           | 5 seconds          |                |                   |               |
| <b>Sample Dissolution</b>           |                    |                |                   |               |
| Perform a dissolution stage         | Yes                |                |                   |               |
| Adjust and hold pH for dissolution  | To start pH        |                |                   |               |
| Stir to dissolve for                | 120 seconds        |                |                   |               |
| For dissolution, stir at            | 10%                |                |                   |               |
| <b>Carbonate purge</b>              |                    |                |                   |               |
| Perform a carbonate purge           | No                 |                |                   |               |
| <b>Temperature Control</b>          |                    |                |                   |               |
| Wait for temperature                | Yes                |                |                   |               |
| Required start temperature          | 25.0°C             |                |                   |               |
| Acceptable deviation                | 0.5°C              |                |                   |               |
| Time to wait                        | 60 seconds         |                |                   |               |
| Stir speed of                       | 50%                |                |                   |               |
| <b>Titration 1</b>                  |                    |                |                   |               |
| Titrate from                        | High to low pH     |                |                   |               |
| Adjust to start pH                  | Yes                |                |                   |               |
| After pH adjust stir for            | 30 seconds         |                |                   |               |
| Stir to allow partitioning for      | 15 seconds         |                |                   |               |
| Stirrer speed for partitioning      | 50%                |                |                   |               |
| <b>Titration 2</b>                  |                    |                |                   |               |
| Titrate from                        | High to low pH     |                |                   |               |
| Add additional water                | 0.00 mL            |                |                   |               |
| Additional partition solvent volume | 0.200 mL           |                |                   |               |
| Additional partition solvent added  | Automatic          |                |                   |               |
| After pH adjust stir for            | 30 seconds         |                |                   |               |
| Stir to allow partitioning for      | 15 seconds         |                |                   |               |
| Stirrer speed for partitioning      | 55%                |                |                   |               |



Sample name: **M08\_octanol**  
 Assay name: **pH-metric high logP**  
 Assay ID: **18C-02007**  
 Filename: **C:\Sirius\_T3\Mehtap\20180302\_exp29\_logP\_T3-2\18C-02007\_M08\_octanol\_pH-metric high logP.t3r**

Experiment start time: **3/2/2018 5:10:52 PM**  
 Analyst: **Pion**  
 Instrument ID: **T312060**

## Assay Settings (continued)

| Setting                             | Value          | Original Value | Date/Time changed | Imported from |
|-------------------------------------|----------------|----------------|-------------------|---------------|
| <b>Titration 3</b>                  |                |                |                   |               |
| Titrate from                        | High to low pH |                |                   |               |
| Add additional water                | 0.00 mL        |                |                   |               |
| Additional partition solvent volume | 0.800 mL       |                |                   |               |
| Additional partition solvent added  | Automatic      |                |                   |               |
| After pH adjust stir for            | 30 seconds     |                |                   |               |
| Stir to allow partitioning for      | 15 seconds     |                |                   |               |
| Stirrer speed for partitioning      | 60%            |                |                   |               |
| <b>Data Point Stability</b>         |                |                |                   |               |
| Stir during data point collection   | No             |                |                   |               |
| Delay before data point collection  | 0 seconds      |                |                   |               |
| Number of points to average         | 20 points      |                |                   |               |
| Time interval between points        | 0.50 seconds   |                |                   |               |
| Required maximum standard deviation | 0.00100 dpH/dt |                |                   |               |
| Stability timeout after             | 60 seconds     |                |                   |               |

## Calibration Settings

| Setting                   | Value  | Date/Time changed   | Imported from             |
|---------------------------|--------|---------------------|---------------------------|
| Four-Plus alpha           | 0.111  | 3/2/2018 5:10:52 PM | C:\Sirius_T3\HCl18C02.t3r |
| Four-Plus S               | 0.9988 | 3/2/2018 5:10:52 PM | C:\Sirius_T3\HCl18C02.t3r |
| Four-Plus jH              | 1.0    | 3/2/2018 5:10:52 PM | C:\Sirius_T3\HCl18C02.t3r |
| Four-Plus jOH             | -0.8   | 3/2/2018 5:10:52 PM | C:\Sirius_T3\HCl18C02.t3r |
| Base concentration factor | 1.000  | 3/2/2018 5:10:52 PM | C:\Sirius_T3\KOH18B27.t3r |
| Acid concentration factor | 0.999  | 3/2/2018 5:10:52 PM | C:\Sirius_T3\HCl18C02.t3r |

## Instrument Settings

| Setting              | Value                      | Batch Id    | Install date           |
|----------------------|----------------------------|-------------|------------------------|
| Instrument owner     | Merck                      |             |                        |
| Instrument ID        | T312060                    |             |                        |
| Instrument type      | T3 Simulator               |             |                        |
| Software version     | 1.1.3.0                    |             |                        |
| Dispenser module     |                            | T3DM1200361 | 3/31/2009 5:24:52 AM   |
| Dispenser 0          | Water                      |             | 3/31/2009 5:25:05 AM   |
| Syringe volume       | 2.5 mL                     |             |                        |
| Firmware version     | 1.2.1(r2)                  |             |                        |
| Titrant              | Water (0.15 M KCl)         | 02-06-2018  | 2/27/2018 10:05:59 AM  |
| Dispenser 2          | Acid                       |             | 3/31/2009 5:25:11 AM   |
| Syringe volume       | 0.5 mL                     |             |                        |
| Firmware version     | 1.2.1(r2)                  |             |                        |
| Titrant              | Acid (0.5 M HCl)           | 02-27-2018  | 2/27/2018 10:27:22 AM  |
| Dispenser 1          | Base                       |             | 3/31/2009 5:25:21 AM   |
| Syringe volume       | 0.5 mL                     |             |                        |
| Firmware version     | 1.2.1(r2)                  |             |                        |
| Titrant              | Base (0.5 M KOH)           | 9/22/2017   | 2/27/2018 10:21:22 AM  |
| Dispenser 5          | Cosolvent                  |             | 3/31/2009 5:26:24 AM   |
| Syringe volume       | 2.5 mL                     |             |                        |
| Firmware version     | 1.2.1(r2)                  |             |                        |
| Distribution valve 5 | Distribution Valve         |             | 3/31/2009 5:28:19 AM   |
| Firmware version     | 1.1.3                      |             |                        |
| Port A               | Methanol (80%, 0.15 M KCl) | 09-26-17    | 2/7/2018 9:42:01 AM    |
| Port B               | Cyclohexane                | 11-01-17    | 2/27/2018 10:37:57 AM  |
| Dispenser 3          | Buffer                     |             | 8/3/2010 5:05:16 AM    |
| Syringe volume       | 0.5 mL                     |             |                        |
| Firmware version     | 1.2.1(r2)                  |             |                        |
| Titrant              | Dodecane                   | 2018/01/31  | 2/28/2018 10:18:04 AM  |
| Dispenser 6          | Octanol                    |             | 10/22/2010 10:52:43 AM |

Sample name: **M08\_octanol** Experiment start time: **3/2/2018 5:10:52 PM**  
 Assay name: **pH-metric high logP** Analyst: **Pion**  
 Assay ID: **18C-02007** Instrument ID: **T312060**  
 Filename: **C:\Sirius\_T3\Mehtap\20180302\_exp29\_logP\_T3-2\18C-02007\_M08\_octanol\_pH-metric high logP.t3r**

## Instrument Settings (continued)

| Setting                                   | Value                      | Batch Id    | Install date           |
|-------------------------------------------|----------------------------|-------------|------------------------|
| Syringe volume                            | 0.5 mL                     |             |                        |
| Firmware version                          | 1.2.1(r2)                  |             |                        |
| Titrant                                   | Octanol                    | 01-31-2018  | 2/27/2018 9:59:35 AM   |
| Titration                                 |                            | T3TM1200161 | 3/31/2009 5:24:17 AM   |
| Horizontal axis firmware version          | 1.17 AI1DI2DO2 Stepper 2   |             |                        |
| Vertical axis firmware version            | 1.17 AI1DI2DO2 Stepper 2   |             |                        |
| Chassis I/O firmware version              | 1.11 AI1DI0DO4 Norgren I/O |             |                        |
| Probe I/O firmware version                | 1.1.1                      |             |                        |
| Electrode                                 | T3 Electrode               | T3E0923     | 1/23/2018 2:01:00 PM   |
| E0 calibration                            | +3.92 mV                   |             | 3/2/2018 5:11:36 PM    |
| Filling solution                          | 3M KCl                     | KCL097      | 3/2/2018 9:43:24 AM    |
| Liquids                                   |                            |             |                        |
| Wash 1                                    | 50% IPA:50% Water          |             | 3/2/2018 9:45:12 AM    |
| Wash 2                                    | 0.5% Triton X-100 in H2O   |             | 3/2/2018 9:45:15 AM    |
| Buffer position 1                         | pH7 Wash                   |             | 3/2/2018 9:45:18 AM    |
| Buffer position 2                         | pH 7                       |             | 3/2/2018 9:45:21 AM    |
| Storage position                          |                            |             | 3/2/2018 9:44:44 AM    |
| Wash water                                | 7.4e+003 mL                | 02-27-2018  | 2/27/2018 9:54:39 AM   |
| Waste                                     | 8.1e+003 mL                |             | 11/28/2017 10:36:29 AM |
| Temperature controller                    |                            |             | 8/5/2010 6:35:13 AM    |
| Turbidity detector                        |                            |             | 3/31/2009 5:24:45 AM   |
| Spectrometer                              |                            | 074811      | 11/23/2010 11:22:28 AM |
| Dip probe                                 |                            | 10196       |                        |
| Wavelength coefficient A0                 | 183.333                    |             |                        |
| Wavelength coefficient A1                 | 2.21568                    |             |                        |
| Wavelength coefficient A2                 | -0.000289308               |             |                        |
| Total lamp lit time                       | 120:41:49                  |             | 11/23/2010 11:22:28 AM |
| Calibrated on                             | 2/27/2018 10:40:38 AM      |             |                        |
| Integration time                          | 40                         |             |                        |
| Scans averaged                            | 10                         |             |                        |
| Autoloader                                |                            | T3AL1200345 | 11/10/2015 9:34:13 AM  |
| Left-right axis firmware version          | 1.17 AI1DI2DO2 Stepper 2   |             |                        |
| Front-back axis firmware version          | 1.17 AI1DI2DO2 Stepper 2   |             |                        |
| Vertical axis firmware version            | 1.17 AI1DI2DO2 Stepper 2   |             |                        |
| Chassis I/O firmware version              | 1.11 AI1DI0DO4 Norgren I/O |             |                        |
| Configuration                             |                            |             |                        |
| Alternate titration position              | Titration position         |             |                        |
| Alternate reference position              | Reference position         |             |                        |
| Maximum standard vial volume              | 3.50 mL                    |             |                        |
| Maximum alternate vial volume             | 25.00 mL                   |             |                        |
| Automatic action idle period              | 5 minute(s)                |             |                        |
| Titration tube volume                     | 1.3 mL                     |             |                        |
| Syringe flush count                       | 3.50                       |             |                        |
| Flowing wash pump volume                  | 20.0 mL                    |             |                        |
| Flowing wash stir duration                | 5 s                        |             |                        |
| Flowing wash stir speed                   | 30%                        |             |                        |
| Solvent wash stir duration                | 5 s                        |             |                        |
| Solvent wash stir speed                   | 30%                        |             |                        |
| Surfactant wash stir duration             | 5 s                        |             |                        |
| Surfactant wash stir speed                | 30%                        |             |                        |
| E0 calibration minimum number of points   | 10                         |             |                        |
| E0 calibration maximum standard deviation | 0.01500                    |             |                        |
| E0 calibration timeout period             | 60 s                       |             |                        |
| E0 calibration stir duration              | 5 s                        |             |                        |
| E0 calibration preparation stir speed     | 30%                        |             |                        |
| E0 calibration buffer wash stir duration  | 5 s                        |             |                        |
| E0 calibration buffer wash stir speed     | 30%                        |             |                        |
| E0 calibration reading stir speed         | 0%                         |             |                        |

Sample name: **M08\_octanol** Experiment start time: **3/2/2018 5:10:52 PM**  
 Assay name: **pH-metric high logP** Analyst: **Pion**  
 Assay ID: **18C-02007** Instrument ID: **T312060**  
 Filename: **C:\Sirius\_T3\Mehtap\20180302\_exp29\_logP\_T3-2\18C-02007\_M08\_octanol\_pH-metric high logP.t3r**

## Instrument Settings (continued)

| Setting                                     | Value   | Batch Id | Install date |
|---------------------------------------------|---------|----------|--------------|
| Spectrometer calibration stir duration      | 5 s     |          |              |
| Spectrometer calibration stir speed         | 30%     |          |              |
| Spectrometer calibration wash pump volume   | 20.0 mL |          |              |
| Spectrometer calibration wash stir duration | 5 s     |          |              |
| Spectrometer calibration wash stir speed    | 30%     |          |              |
| Overhead dispense height                    | 10000   |          |              |

## Refinement Settings

| Setting                        | Value    | Default value |
|--------------------------------|----------|---------------|
| Turbidity detection method     | None     | None          |
| Turbidity wavelength to assess | 500.0 nm | 500.0 nm      |
| Turbidity maximum absorbance   | 0.100    | 0.100         |
| Turbidity probe threshold      | 50.00    | 50.00         |

## Experiment Log

[1:59] Air gap released for Acid (0.5 M HCl)  
 [2:54] Air gap created for Water (0.15 M KCl)  
 [2:54] Air gap created for Acid (0.5 M HCl)  
 [2:55] Air gap created for Base (0.5 M KOH)  
 [2:55] Air gap released for Water (0.15 M KCl)  
 [2:59] Titrator arm moved over Titration position  
 [2:59] Titration 1 of 3  
 [2:59] Adding initial titrants  
 [2:59] Automatically add 1.50000 mL of water  
 [3:24] Dispensed 1.500000 mL of Water (0.15 M KCl)  
 [3:28] Titrator arm moved over Drain  
 [6:09] Titrator arm moved to Titration position  
 [6:09] Argon flow rate set to 100  
 [6:09] Stirrer speed set to 10  
 [6:16] Initial pH = 5.74  
 [6:16] Iterative adjust 5.74 -> 10.00  
 [6:16] pH 5.74 -> 10.00  
 [6:16] Air gap released for Base (0.5 M KOH)  
 [6:17] Dispensed 0.006468 mL of Base (0.5 M KOH)  
 [6:22] Holding pH 10.00  
 [8:22] Stirrer speed set to 0  
 [8:22] Stirrer speed set to 50  
 [8:22] Iterative adjust 11.25 -> 10.00  
 [9:07] Stirrer speed set to 0  
 [9:42] Datapoint id 2 collected  
 [9:42] Stirrer speed set to 50  
 [9:47] pH 10.83 -> 10.63  
 [9:47] Using cautious pH adjust  
 [9:48] Air gap released for Acid (0.5 M HCl)  
 [9:49] Dispensed 0.000517 mL of Acid (0.5 M HCl)  
 [9:54] Stepping pH = 10.62  
 [10:09] Stirrer speed set to 0  
 [10:44] Datapoint id 3 collected  
 [10:44] Charge balance equation is out by 50.1%  
 [10:44] Stirrer speed set to 50  
 [10:49] pH 10.50 -> 10.30  
 [10:49] Using cautious pH adjust  
 [10:49] Dispensed 0.000259 mL of Acid (0.5 M HCl)  
 [10:54] Stepping pH = 10.44  
 [10:54] Dispensed 0.000306 mL of Acid (0.5 M HCl)  
 [10:59] Stepping pH = 10.31  
 [11:14] Stirrer speed set to 0

Sample name: **M08\_octanol**  
Assay name: **pH-metric high logP**  
Assay ID: **18C-02007**  
Filename: **C:\Sirius\_T3\Mehtap\20180302\_exp29\_logP\_T3-2\18C-02007\_M08\_octanol\_pH-metric high logP.t3r**

Experiment start time: **3/2/2018 5:10:52 PM**  
Analyst: **Pion**  
Instrument ID: **T312060**

## Experiment Log (continued)

[11:41] Datapoint id 4 collected  
[11:41] Charge balance equation is out by -9.4%  
[11:41] Stirrer speed set to 50  
[11:46] pH 10.22 -> 10.02  
[11:46] Using charge balance adjust  
[11:47] Dispensed 0.000282 mL of Acid (0.5 M HCl)  
[12:07] Stirrer speed set to 0  
[12:35] Datapoint id 5 collected  
[12:35] Charge balance equation is out by 4.0%  
[12:35] Stirrer speed set to 50  
[12:40] pH 10.00 -> 9.80  
[12:40] Using charge balance adjust  
[12:40] Dispensed 0.000188 mL of Acid (0.5 M HCl)  
[13:01] Stirrer speed set to 0  
[13:29] Datapoint id 6 collected  
[13:29] Charge balance equation is out by -10.5%  
[13:29] Stirrer speed set to 50  
[13:34] pH 9.81 -> 9.61  
[13:34] Using charge balance adjust  
[13:34] Dispensed 0.000141 mL of Acid (0.5 M HCl)  
[13:54] Stirrer speed set to 0  
[14:24] Datapoint id 7 collected  
[14:24] Charge balance equation is out by -4.1%  
[14:24] Stirrer speed set to 50  
[14:29] pH 9.60 -> 9.40  
[14:29] Using charge balance adjust  
[14:29] Dispensed 0.000094 mL of Acid (0.5 M HCl)  
[14:49] Stirrer speed set to 0  
[15:20] Datapoint id 8 collected  
[15:20] Charge balance equation is out by -16.0%  
[15:20] Stirrer speed set to 50  
[15:25] pH 9.40 -> 9.20  
[15:25] Using cautious pH adjust  
[15:25] Dispensed 0.000024 mL of Acid (0.5 M HCl)  
[15:30] Stepping pH = 9.38  
[15:30] Dispensed 0.000071 mL of Acid (0.5 M HCl)  
[15:35] Stepping pH = 9.22  
[15:35] Dispensed 0.000024 mL of Acid (0.5 M HCl)  
[15:40] Stepping pH = 9.17  
[15:55] Stirrer speed set to 0  
[16:29] Datapoint id 9 collected  
[16:29] Charge balance equation is out by -121.4%  
[16:29] Stirrer speed set to 50  
[16:34] pH 9.07 -> 8.87  
[16:34] Using cautious pH adjust  
[16:34] Dispensed 0.000024 mL of Acid (0.5 M HCl)  
[16:40] Stepping pH = 9.05  
[16:40] Dispensed 0.000047 mL of Acid (0.5 M HCl)  
[16:45] Stepping pH = 8.91  
[16:45] Dispensed 0.000024 mL of Acid (0.5 M HCl)  
[16:50] Stepping pH = 8.80  
[17:05] Stirrer speed set to 0  
[17:15] Datapoint id 10 collected  
[17:15] Charge balance equation is out by -150.8%  
[17:15] Stirrer speed set to 50  
[17:20] pH 8.72 -> 8.52  
[17:20] Using cautious pH adjust  
[17:21] Dispensed 0.000024 mL of Acid (0.5 M HCl)  
[17:26] Stepping pH = 8.71

Sample name: **M08\_octanol**  
Assay name: **pH-metric high logP**  
Assay ID: **18C-02007**  
Filename: **C:\Sirius\_T3\Mehtap\20180302\_exp29\_logP\_T3-2\18C-02007\_M08\_octanol\_pH-metric high logP.t3r**

Experiment start time: **3/2/2018 5:10:52 PM**  
Analyst: **Pion**  
Instrument ID: **T312060**

## Experiment Log (continued)

[17:26] Dispensed 0.000024 mL of Acid (0.5 M HCl)  
[17:31] Stepping pH = 8.66  
[17:31] Dispensed 0.000047 mL of Acid (0.5 M HCl)  
[17:36] Stepping pH = 8.37  
[17:51] Stirrer speed set to 0  
[18:08] Datapoint id 11 collected  
[18:08] Charge balance equation is out by -335.3%  
[18:08] Stirrer speed set to 50  
[18:13] pH 8.27 -> 8.07  
[18:13] Using cautious pH adjust  
[18:14] Dispensed 0.000024 mL of Acid (0.5 M HCl)  
[18:19] Stepping pH = 8.26  
[18:19] Dispensed 0.000047 mL of Acid (0.5 M HCl)  
[18:24] Stepping pH = 8.12  
[18:24] Dispensed 0.000024 mL of Acid (0.5 M HCl)  
[18:29] Stepping pH = 8.04  
[18:44] Stirrer speed set to 0  
[19:00] Datapoint id 12 collected  
[19:00] Charge balance equation is out by -155.8%  
[19:00] Stirrer speed set to 50  
[19:05] pH 7.96 -> 7.76  
[19:05] Using cautious pH adjust  
[19:05] Dispensed 0.000024 mL of Acid (0.5 M HCl)  
[19:10] Stepping pH = 7.95  
[19:10] Dispensed 0.000094 mL of Acid (0.5 M HCl)  
[19:15] Stepping pH = 7.75  
[19:31] Stirrer speed set to 0  
[19:48] Datapoint id 13 collected  
[19:48] Charge balance equation is out by -93.4%  
[19:48] Stirrer speed set to 50  
[19:53] pH 7.69 -> 7.49  
[19:53] Using cautious pH adjust  
[19:53] Dispensed 0.000047 mL of Acid (0.5 M HCl)  
[19:58] Stepping pH = 7.66  
[19:58] Dispensed 0.000141 mL of Acid (0.5 M HCl)  
[20:03] Stepping pH = 7.44  
[20:18] Stirrer speed set to 0  
[20:34] Datapoint id 14 collected  
[20:34] Charge balance equation is out by -74.1%  
[20:34] Stirrer speed set to 50  
[20:39] pH 7.42 -> 7.22  
[20:39] Using cautious pH adjust  
[20:39] Dispensed 0.000094 mL of Acid (0.5 M HCl)  
[20:44] Stepping pH = 7.35  
[20:44] Dispensed 0.000118 mL of Acid (0.5 M HCl)  
[20:49] Stepping pH = 7.23  
[20:49] Dispensed 0.000024 mL of Acid (0.5 M HCl)  
[20:54] Stepping pH = 7.22  
[21:10] Stirrer speed set to 0  
[21:26] Datapoint id 15 collected  
[21:26] Charge balance equation is out by -18.8%  
[21:26] Stirrer speed set to 50  
[21:31] pH 7.22 -> 7.02  
[21:31] Using cautious pH adjust  
[21:31] Dispensed 0.000141 mL of Acid (0.5 M HCl)  
[21:36] Stepping pH = 7.12  
[21:36] Dispensed 0.000094 mL of Acid (0.5 M HCl)  
[21:41] Stepping pH = 7.07  
[21:41] Dispensed 0.000071 mL of Acid (0.5 M HCl)

Sample name: **M08\_octanol**  
 Assay name: **pH-metric high logP**  
 Assay ID: **18C-02007**  
 Filename: **C:\Sirius\_T3\Mehtap\20180302\_exp29\_logP\_T3-2\18C-02007\_M08\_octanol\_pH-metric high logP.t3r**

Experiment start time: **3/2/2018 5:10:52 PM**  
 Analyst: **Pion**  
 Instrument ID: **T312060**

## Experiment Log (continued)

[21:46] Stepping pH = 7.03  
 [22:01] Stirrer speed set to 0  
 [22:17] Datapoint id 16 collected  
 [22:17] Charge balance equation is out by -9.3%  
 [22:17] Stirrer speed set to 50  
 [22:22] pH 7.05 -> 6.85  
 [22:22] Using charge balance adjust  
 [22:22] Dispensed 0.000400 mL of Acid (0.5 M HCl)  
 [22:42] Stirrer speed set to 0  
 [22:57] Datapoint id 17 collected  
 [22:57] Charge balance equation is out by -6.8%  
 [22:57] Stirrer speed set to 50  
 [23:02] pH 6.86 -> 6.66  
 [23:02] Using charge balance adjust  
 [23:02] Dispensed 0.000541 mL of Acid (0.5 M HCl)  
 [23:23] Stirrer speed set to 0  
 [23:37] Datapoint id 18 collected  
 [23:37] Charge balance equation is out by -17.6%  
 [23:37] Stirrer speed set to 50  
 [23:42] pH 6.69 -> 6.49  
 [23:42] Using cautious pH adjust  
 [23:42] Dispensed 0.000353 mL of Acid (0.5 M HCl)  
 [23:47] Stepping pH = 6.57  
 [23:47] Dispensed 0.000188 mL of Acid (0.5 M HCl)  
 [23:52] Stepping pH = 6.54  
 [23:52] Dispensed 0.000188 mL of Acid (0.5 M HCl)  
 [23:57] Stepping pH = 6.50  
 [24:12] Stirrer speed set to 0  
 [24:26] Datapoint id 19 collected  
 [24:26] Charge balance equation is out by -4.7%  
 [24:26] Stirrer speed set to 50  
 [24:31] pH 6.53 -> 6.33  
 [24:31] Using charge balance adjust  
 [24:31] Dispensed 0.000823 mL of Acid (0.5 M HCl)  
 [24:51] Stirrer speed set to 0  
 [25:05] Datapoint id 20 collected  
 [25:05] Charge balance equation is out by -13.9%  
 [25:05] Stirrer speed set to 50  
 [25:10] pH 6.36 -> 6.16  
 [25:10] Using charge balance adjust  
 [25:10] Dispensed 0.000941 mL of Acid (0.5 M HCl)  
 [25:30] Stirrer speed set to 0  
 [25:43] Datapoint id 21 collected  
 [25:43] Charge balance equation is out by -17.0%  
 [25:43] Stirrer speed set to 50  
 [25:48] pH 6.19 -> 5.99  
 [25:48] Using cautious pH adjust  
 [25:48] Dispensed 0.000494 mL of Acid (0.5 M HCl)  
 [25:53] Stepping pH = 6.09  
 [25:53] Dispensed 0.000306 mL of Acid (0.5 M HCl)  
 [25:59] Stepping pH = 6.04  
 [25:59] Dispensed 0.000188 mL of Acid (0.5 M HCl)  
 [26:04] Stepping pH = 6.01  
 [26:04] Dispensed 0.000118 mL of Acid (0.5 M HCl)  
 [26:09] Stepping pH = 6.00  
 [26:09] Dispensed 0.000094 mL of Acid (0.5 M HCl)  
 [26:14] Stepping pH = 5.99  
 [26:29] Stirrer speed set to 0  
 [26:40] Datapoint id 22 collected



Sample name: **M08\_octanol**  
Assay name: **pH-metric high logP**  
Assay ID: **18C-02007**  
Filename: **C:\Sirius\_T3\Mehtap\20180302\_exp29\_logP\_T3-2\18C-02007\_M08\_octanol\_pH-metric high logP.t3r**

Experiment start time: **3/2/2018 5:10:52 PM**  
Analyst: **Pion**  
Instrument ID: **T312060**

## Experiment Log (continued)

[26:40] Charge balance equation is out by -22.6%  
[26:40] Stirrer speed set to 50  
[26:45] pH 6.00 -> 5.80  
[26:45] Using cautious pH adjust  
[26:45] Dispensed 0.000494 mL of Acid (0.5 M HCl)  
[26:50] Stepping pH = 5.88  
[26:50] Dispensed 0.000235 mL of Acid (0.5 M HCl)  
[26:55] Stepping pH = 5.85  
[26:55] Dispensed 0.000188 mL of Acid (0.5 M HCl)  
[27:00] Stepping pH = 5.82  
[27:01] Dispensed 0.000071 mL of Acid (0.5 M HCl)  
[27:06] Stepping pH = 5.81  
[27:21] Stirrer speed set to 0  
[27:34] Datapoint id 23 collected  
[27:34] Charge balance equation is out by -0.9%  
[27:34] Stirrer speed set to 50  
[27:39] pH 5.82 -> 5.62  
[27:39] Using charge balance adjust  
[27:39] Dispensed 0.000894 mL of Acid (0.5 M HCl)  
[27:59] Stirrer speed set to 0  
[28:59] Datapoint id 24 collected  
[28:59] Charge balance equation is out by -7.3%  
[28:59] Stirrer speed set to 50  
[29:04] pH 5.65 -> 5.45  
[29:04] Using charge balance adjust  
[29:04] Dispensed 0.000753 mL of Acid (0.5 M HCl)  
[29:24] Stirrer speed set to 0  
[30:24] Datapoint id 25 collected  
[30:24] Charge balance equation is out by -68.1%  
[30:24] Stirrer speed set to 50  
[30:30] pH 5.66 -> 5.46  
[30:30] Using cautious pH adjust  
[30:30] Dispensed 0.000376 mL of Acid (0.5 M HCl)  
[30:35] Stepping pH = 5.52  
[30:35] Dispensed 0.000118 mL of Acid (0.5 M HCl)  
[30:40] Stepping pH = 5.51  
[30:40] Dispensed 0.000306 mL of Acid (0.5 M HCl)  
[30:45] Stepping pH = 5.31  
[31:00] Stirrer speed set to 0  
[32:00] Datapoint id 26 collected  
[32:00] Charge balance equation is out by -6.1%  
[32:00] Stirrer speed set to 50  
[32:05] pH 5.62 -> 5.42  
[32:05] Using charge balance adjust  
[32:06] Dispensed 0.000729 mL of Acid (0.5 M HCl)  
[32:26] Stirrer speed set to 0  
[33:15] Datapoint id 27 collected  
[33:15] Charge balance equation is out by 443.4%  
[33:15] Stirrer speed set to 50  
[33:20] pH 4.60 -> 4.40  
[33:20] Using cautious pH adjust  
[33:20] Dispensed 0.000094 mL of Acid (0.5 M HCl)  
[33:25] Stepping pH = 4.61  
[33:25] Dispensed 0.000447 mL of Acid (0.5 M HCl)  
[33:30] Stepping pH = 3.88  
[33:45] Stirrer speed set to 0  
[33:57] Datapoint id 28 collected  
[33:57] Charge balance equation is out by -208.0%  
[33:57] Stirrer speed set to 50

Sample name: **M08\_octanol**  
Assay name: **pH-metric high logP**  
Assay ID: **18C-02007**  
Filename: **C:\Sirius\_T3\Mehtap\20180302\_exp29\_logP\_T3-2\18C-02007\_M08\_octanol\_pH-metric high logP.t3r**

Experiment start time: **3/2/2018 5:10:52 PM**  
Analyst: **Pion**  
Instrument ID: **T312060**

## Experiment Log (continued)

[34:02] pH 3.89 -> 3.69  
[34:02] Using cautious pH adjust  
[34:02] Dispensed 0.000165 mL of Acid (0.5 M HCl)  
[34:07] Stepping pH = 3.81  
[34:07] Dispensed 0.000188 mL of Acid (0.5 M HCl)  
[34:12] Stepping pH = 3.70  
[34:12] Dispensed 0.000024 mL of Acid (0.5 M HCl)  
[34:18] Stepping pH = 3.70  
[34:33] Stirrer speed set to 0  
[34:43] Datapoint id 29 collected  
[34:43] Charge balance equation is out by -13.2%  
[34:43] Stirrer speed set to 50  
[34:48] pH 3.69 -> 3.49  
[34:48] Using charge balance adjust  
[34:48] Dispensed 0.000470 mL of Acid (0.5 M HCl)  
[35:08] Stirrer speed set to 0  
[35:18] Datapoint id 30 collected  
[35:18] Charge balance equation is out by 6.0%  
[35:18] Stirrer speed set to 50  
[35:23] pH 3.48 -> 3.28  
[35:23] Using charge balance adjust  
[35:24] Dispensed 0.000776 mL of Acid (0.5 M HCl)  
[35:44] Stirrer speed set to 0  
[35:54] Datapoint id 31 collected  
[35:54] Charge balance equation is out by 3.3%  
[35:54] Stirrer speed set to 50  
[35:59] pH 3.28 -> 3.08  
[35:59] Using charge balance adjust  
[35:59] Dispensed 0.001223 mL of Acid (0.5 M HCl)  
[36:19] Stirrer speed set to 0  
[36:29] Datapoint id 32 collected  
[36:29] Charge balance equation is out by 2.2%  
[36:29] Stirrer speed set to 50  
[36:34] pH 3.08 -> 2.88  
[36:34] Using charge balance adjust  
[36:34] Dispensed 0.001929 mL of Acid (0.5 M HCl)  
[36:55] Stirrer speed set to 0  
[37:05] Datapoint id 33 collected  
[37:05] Charge balance equation is out by 6.6%  
[37:05] Stirrer speed set to 50  
[37:10] pH 2.87 -> 2.67  
[37:10] Using charge balance adjust  
[37:10] Dispensed 0.003128 mL of Acid (0.5 M HCl)  
[37:30] Stirrer speed set to 0  
[37:40] Datapoint id 34 collected  
[37:40] Charge balance equation is out by 9.6%  
[37:40] Stirrer speed set to 50  
[37:45] pH 2.66 -> 2.46  
[37:45] Using charge balance adjust  
[37:46] Dispensed 0.005151 mL of Acid (0.5 M HCl)  
[38:06] Stirrer speed set to 0  
[38:16] Datapoint id 35 collected  
[38:16] Charge balance equation is out by 4.2%  
[38:16] Stirrer speed set to 50  
[38:21] pH 2.45 -> 2.25  
[38:21] Using charge balance adjust  
[38:21] Dispensed 0.008373 mL of Acid (0.5 M HCl)  
[38:41] Stirrer speed set to 0  
[38:52] Datapoint id 36 collected



Sample name: **M08\_octanol**  
Assay name: **pH-metric high logP**  
Assay ID: **18C-02007**  
Filename: **C:\Sirius\_T3\Mehtap\20180302\_exp29\_logP\_T3-2\18C-02007\_M08\_octanol\_pH-metric high logP.t3r**

Experiment start time: **3/2/2018 5:10:52 PM**  
Analyst: **Pion**  
Instrument ID: **T312060**

## Experiment Log (continued)

[38:52] Charge balance equation is out by -0.7%  
[38:52] Stirrer speed set to 50  
[38:57] pH 2.26 -> 2.06  
[38:57] Using charge balance adjust  
[38:57] Dispensed 0.013335 mL of Acid (0.5 M HCl)  
[39:18] Stirrer speed set to 0  
[39:28] Datapoint id 37 collected  
[39:28] Charge balance equation is out by 6.9%  
[39:28] Stirrer speed set to 50  
[39:33] pH 2.05 -> 1.95  
[39:33] Using charge balance adjust  
[39:33] Dispensed 0.009737 mL of Acid (0.5 M HCl)  
[39:54] Stirrer speed set to 0  
[40:04] Datapoint id 38 collected  
[40:04] Charge balance equation is out by -48.9%  
[40:04] Titration 2 of 3  
[40:04] Adding initial titrants  
[40:04] Automatically add 0.20000 mL of Octanol  
[40:08] Dispensed 0.200000 mL of Octanol  
[40:08] Stirrer speed set to 10  
[40:09] Stirrer speed set to 55  
[40:09] Iterative adjust 1.95 -> 10.00  
[40:09] pH 1.95 -> 10.00  
[40:11] Dispensed 0.055880 mL of Base (0.5 M KOH)  
[41:01] Stirrer speed set to 0  
[41:48] Datapoint id 39 collected  
[41:48] Stirrer speed set to 55  
[41:53] pH 10.59 -> 10.39  
[41:53] Using cautious pH adjust  
[41:53] Dispensed 0.000329 mL of Acid (0.5 M HCl)  
[41:58] Stepping pH = 10.50  
[41:58] Dispensed 0.000259 mL of Acid (0.5 M HCl)  
[42:03] Stepping pH = 10.41  
[42:03] Dispensed 0.000047 mL of Acid (0.5 M HCl)  
[42:08] Stepping pH = 10.40  
[42:08] Dispensed 0.000024 mL of Acid (0.5 M HCl)  
[42:14] Stepping pH = 10.39  
[42:29] Stirrer speed set to 0  
[42:50] Datapoint id 40 collected  
[42:50] Charge balance equation is out by -0.8%  
[42:50] Stirrer speed set to 55  
[42:55] pH 10.36 -> 10.16  
[42:55] Using charge balance adjust  
[42:55] Dispensed 0.000423 mL of Acid (0.5 M HCl)  
[43:15] Stirrer speed set to 0  
[43:36] Datapoint id 41 collected  
[43:36] Charge balance equation is out by 17.8%  
[43:36] Stirrer speed set to 55  
[43:41] pH 10.13 -> 9.93  
[43:41] Using cautious pH adjust  
[43:41] Dispensed 0.000118 mL of Acid (0.5 M HCl)  
[43:46] Stepping pH = 10.09  
[43:46] Dispensed 0.000259 mL of Acid (0.5 M HCl)  
[43:51] Stepping pH = 9.88  
[44:06] Stirrer speed set to 0  
[44:16] Datapoint id 42 collected  
[44:16] Charge balance equation is out by -46.0%  
[44:16] Stirrer speed set to 55  
[44:21] pH 9.86 -> 9.66

Sample name: **M08\_octanol**  
Assay name: **pH-metric high logP**  
Assay ID: **18C-02007**  
Filename: **C:\Sirius\_T3\Mehtap\20180302\_exp29\_logP\_T3-2\18C-02007\_M08\_octanol\_pH-metric high logP.t3r**

Experiment start time: **3/2/2018 5:10:52 PM**  
Analyst: **Pion**  
Instrument ID: **T312060**

## Experiment Log (continued)

[44:21] Using cautious pH adjust  
[44:21] Dispensed 0.000071 mL of Acid (0.5 M HCl)  
[44:26] Stepping pH = 9.85  
[44:27] Dispensed 0.000235 mL of Acid (0.5 M HCl)  
[44:32] Stepping pH = 9.55  
[44:47] Stirrer speed set to 0  
[45:05] Datapoint id 43 collected  
[45:05] Charge balance equation is out by -94.9%  
[45:05] Stirrer speed set to 55  
[45:10] pH 9.51 -> 9.31  
[45:10] Using cautious pH adjust  
[45:10] Dispensed 0.000047 mL of Acid (0.5 M HCl)  
[45:15] Stepping pH = 9.50  
[45:15] Dispensed 0.000118 mL of Acid (0.5 M HCl)  
[45:20] Stepping pH = 9.30  
[45:36] Stirrer speed set to 0  
[45:46] Datapoint id 44 collected  
[45:46] Charge balance equation is out by -88.8%  
[45:46] Stirrer speed set to 55  
[45:51] pH 9.23 -> 9.03  
[45:51] Using cautious pH adjust  
[45:51] Dispensed 0.000024 mL of Acid (0.5 M HCl)  
[45:56] Stepping pH = 9.22  
[45:56] Dispensed 0.000071 mL of Acid (0.5 M HCl)  
[46:01] Stepping pH = 9.10  
[46:01] Dispensed 0.000024 mL of Acid (0.5 M HCl)  
[46:06] Stepping pH = 9.06  
[46:06] Dispensed 0.000024 mL of Acid (0.5 M HCl)  
[46:11] Stepping pH = 9.02  
[46:26] Stirrer speed set to 0  
[46:38] Datapoint id 45 collected  
[46:38] Charge balance equation is out by -183.9%  
[46:38] Stirrer speed set to 55  
[46:43] pH 8.90 -> 8.70  
[46:43] Using cautious pH adjust  
[46:44] Dispensed 0.000024 mL of Acid (0.5 M HCl)  
[46:49] Stepping pH = 8.89  
[46:49] Dispensed 0.000071 mL of Acid (0.5 M HCl)  
[46:54] Stepping pH = 8.63  
[47:09] Stirrer speed set to 0  
[47:24] Datapoint id 46 collected  
[47:24] Charge balance equation is out by -94.4%  
[47:24] Stirrer speed set to 55  
[47:29] pH 8.54 -> 8.34  
[47:29] Using cautious pH adjust  
[47:29] Dispensed 0.000024 mL of Acid (0.5 M HCl)  
[47:34] Stepping pH = 8.53  
[47:34] Dispensed 0.000094 mL of Acid (0.5 M HCl)  
[47:39] Stepping pH = 8.30  
[47:54] Stirrer speed set to 0  
[48:10] Datapoint id 47 collected  
[48:10] Charge balance equation is out by -96.0%  
[48:10] Stirrer speed set to 55  
[48:16] pH 8.23 -> 8.03  
[48:16] Using cautious pH adjust  
[48:16] Dispensed 0.000047 mL of Acid (0.5 M HCl)  
[48:21] Stepping pH = 8.20  
[48:21] Dispensed 0.000118 mL of Acid (0.5 M HCl)  
[48:26] Stepping pH = 8.01

Sample name: **M08\_octanol**  
Assay name: **pH-metric high logP**  
Assay ID: **18C-02007**  
Filename: **C:\Sirius\_T3\Mehtap\20180302\_exp29\_logP\_T3-2\18C-02007\_M08\_octanol\_pH-metric high logP.t3r**

Experiment start time: **3/2/2018 5:10:52 PM**  
Analyst: **Pion**  
Instrument ID: **T312060**

## Experiment Log (continued)

[48:41] Stirrer speed set to 0  
[48:55] Datapoint id 48 collected  
[48:55] Charge balance equation is out by -69.2%  
[48:55] Stirrer speed set to 55  
[49:01] pH 7.95 -> 7.75  
[49:01] Using cautious pH adjust  
[49:01] Dispensed 0.000094 mL of Acid (0.5 M HCl)  
[49:06] Stepping pH = 7.87  
[49:06] Dispensed 0.000094 mL of Acid (0.5 M HCl)  
[49:11] Stepping pH = 7.78  
[49:11] Dispensed 0.000047 mL of Acid (0.5 M HCl)  
[49:16] Stepping pH = 7.75  
[49:31] Stirrer speed set to 0  
[49:45] Datapoint id 49 collected  
[49:45] Charge balance equation is out by -25.6%  
[49:45] Stirrer speed set to 55  
[49:50] pH 7.72 -> 7.52  
[49:50] Using cautious pH adjust  
[49:50] Dispensed 0.000141 mL of Acid (0.5 M HCl)  
[49:55] Stepping pH = 7.62  
[49:55] Dispensed 0.000118 mL of Acid (0.5 M HCl)  
[50:00] Stepping pH = 7.55  
[50:00] Dispensed 0.000047 mL of Acid (0.5 M HCl)  
[50:05] Stepping pH = 7.53  
[50:05] Dispensed 0.000024 mL of Acid (0.5 M HCl)  
[50:10] Stepping pH = 7.52  
[50:25] Stirrer speed set to 0  
[50:41] Datapoint id 50 collected  
[50:41] Charge balance equation is out by -10.2%  
[50:41] Stirrer speed set to 55  
[50:46] pH 7.50 -> 7.30  
[50:46] Using charge balance adjust  
[50:46] Dispensed 0.000423 mL of Acid (0.5 M HCl)  
[51:06] Stirrer speed set to 0  
[51:18] Datapoint id 51 collected  
[51:18] Charge balance equation is out by -1.5%  
[51:18] Stirrer speed set to 55  
[51:23] pH 7.29 -> 7.09  
[51:23] Using charge balance adjust  
[51:23] Dispensed 0.000611 mL of Acid (0.5 M HCl)  
[51:43] Stirrer speed set to 0  
[51:55] Datapoint id 52 collected  
[51:55] Charge balance equation is out by -3.4%  
[51:55] Stirrer speed set to 55  
[52:00] pH 7.09 -> 6.89  
[52:00] Using charge balance adjust  
[52:01] Dispensed 0.000776 mL of Acid (0.5 M HCl)  
[52:21] Stirrer speed set to 0  
[52:33] Datapoint id 53 collected  
[52:33] Charge balance equation is out by -3.7%  
[52:33] Stirrer speed set to 55  
[52:38] pH 6.89 -> 6.69  
[52:38] Using charge balance adjust  
[52:38] Dispensed 0.000941 mL of Acid (0.5 M HCl)  
[52:59] Stirrer speed set to 0  
[53:11] Datapoint id 54 collected  
[53:11] Charge balance equation is out by 3.2%  
[53:11] Stirrer speed set to 55  
[53:16] pH 6.69 -> 6.49

Sample name: **M08\_octanol**  
Assay name: **pH-metric high logP**  
Assay ID: **18C-02007**  
Filename: **C:\Sirius\_T3\Mehtap\20180302\_exp29\_logP\_T3-2\18C-02007\_M08\_octanol\_pH-metric high logP.t3r**

Experiment start time: **3/2/2018 5:10:52 PM**  
Analyst: **Pion**  
Instrument ID: **T312060**

## Experiment Log (continued)

[53:16] Using charge balance adjust  
[53:16] Dispensed 0.001011 mL of Acid (0.5 M HCl)  
[53:37] Stirrer speed set to 0  
[53:51] Datapoint id 55 collected  
[53:51] Charge balance equation is out by 1.7%  
[53:51] Stirrer speed set to 55  
[53:56] pH 6.48 -> 6.28  
[53:56] Using charge balance adjust  
[53:56] Dispensed 0.000988 mL of Acid (0.5 M HCl)  
[54:17] Stirrer speed set to 0  
[54:33] Datapoint id 56 collected  
[54:33] Charge balance equation is out by 3.6%  
[54:33] Stirrer speed set to 55  
[54:38] pH 6.26 -> 6.06  
[54:38] Using charge balance adjust  
[54:38] Dispensed 0.000847 mL of Acid (0.5 M HCl)  
[54:58] Stirrer speed set to 0  
[55:14] Datapoint id 57 collected  
[55:14] Charge balance equation is out by 4.4%  
[55:14] Stirrer speed set to 55  
[55:19] pH 6.04 -> 5.84  
[55:19] Using charge balance adjust  
[55:19] Dispensed 0.000682 mL of Acid (0.5 M HCl)  
[55:39] Stirrer speed set to 0  
[55:54] Datapoint id 58 collected  
[55:54] Charge balance equation is out by 4.2%  
[55:54] Stirrer speed set to 55  
[55:59] pH 5.82 -> 5.62  
[55:59] Using charge balance adjust  
[55:59] Dispensed 0.000470 mL of Acid (0.5 M HCl)  
[56:19] Stirrer speed set to 0  
[56:34] Datapoint id 59 collected  
[56:34] Charge balance equation is out by -5.4%  
[56:34] Stirrer speed set to 55  
[56:39] pH 5.61 -> 5.41  
[56:39] Using charge balance adjust  
[56:39] Dispensed 0.000329 mL of Acid (0.5 M HCl)  
[56:59] Stirrer speed set to 0  
[57:14] Datapoint id 60 collected  
[57:14] Charge balance equation is out by -8.3%  
[57:14] Stirrer speed set to 55  
[57:19] pH 5.41 -> 5.21  
[57:19] Using charge balance adjust  
[57:19] Dispensed 0.000235 mL of Acid (0.5 M HCl)  
[57:39] Stirrer speed set to 0  
[57:54] Datapoint id 61 collected  
[57:54] Charge balance equation is out by -7.7%  
[57:54] Stirrer speed set to 55  
[57:59] pH 5.20 -> 5.00  
[57:59] Using charge balance adjust  
[57:59] Dispensed 0.000165 mL of Acid (0.5 M HCl)  
[58:19] Stirrer speed set to 0  
[58:33] Datapoint id 62 collected  
[58:33] Charge balance equation is out by -25.6%  
[58:33] Stirrer speed set to 55  
[58:38] pH 5.02 -> 4.82  
[58:38] Using cautious pH adjust  
[58:38] Dispensed 0.000071 mL of Acid (0.5 M HCl)  
[58:44] Stepping pH = 4.97

Sample name: **M08\_octanol**  
Assay name: **pH-metric high logP**  
Assay ID: **18C-02007**  
Filename: **C:\Sirius\_T3\Mehtap\20180302\_exp29\_logP\_T3-2\18C-02007\_M08\_octanol\_pH-metric high logP.t3r**

Experiment start time: **3/2/2018 5:10:52 PM**  
Analyst: **Pion**  
Instrument ID: **T312060**

## Experiment Log (continued)

[58:44] Dispensed 0.000094 mL of Acid (0.5 M HCl)  
[58:49] Stepping pH = 4.80  
[59:04] Stirrer speed set to 0  
[59:17] Datapoint id 63 collected  
[59:17] Charge balance equation is out by -23.5%  
[59:17] Stirrer speed set to 55  
[59:22] pH 4.77 -> 4.57  
[59:22] Using cautious pH adjust  
[59:22] Dispensed 0.000047 mL of Acid (0.5 M HCl)  
[59:27] Stepping pH = 4.74  
[59:27] Dispensed 0.000118 mL of Acid (0.5 M HCl)  
[59:32] Stepping pH = 4.49  
[59:47] Stirrer speed set to 0  
[1:00:01] Datapoint id 64 collected  
[1:00:01] Charge balance equation is out by -69.6%  
[1:00:01] Stirrer speed set to 55  
[1:00:06] pH 4.47 -> 4.27  
[1:00:06] Using cautious pH adjust  
[1:00:06] Dispensed 0.000047 mL of Acid (0.5 M HCl)  
[1:00:11] Stepping pH = 4.45  
[1:00:11] Dispensed 0.000141 mL of Acid (0.5 M HCl)  
[1:00:16] Stepping pH = 4.20  
[1:00:31] Stirrer speed set to 0  
[1:00:43] Datapoint id 65 collected  
[1:00:43] Charge balance equation is out by -85.9%  
[1:00:43] Stirrer speed set to 55  
[1:00:48] pH 4.19 -> 3.99  
[1:00:48] Using cautious pH adjust  
[1:00:48] Dispensed 0.000094 mL of Acid (0.5 M HCl)  
[1:00:53] Stepping pH = 4.10  
[1:00:53] Dispensed 0.000071 mL of Acid (0.5 M HCl)  
[1:00:58] Stepping pH = 4.03  
[1:00:58] Dispensed 0.000047 mL of Acid (0.5 M HCl)  
[1:01:04] Stepping pH = 4.00  
[1:01:04] Dispensed 0.000024 mL of Acid (0.5 M HCl)  
[1:01:09] Stepping pH = 3.98  
[1:01:24] Stirrer speed set to 0  
[1:01:34] Datapoint id 66 collected  
[1:01:34] Charge balance equation is out by -32.8%  
[1:01:34] Stirrer speed set to 55  
[1:01:39] pH 3.97 -> 3.77  
[1:01:39] Using cautious pH adjust  
[1:01:39] Dispensed 0.000141 mL of Acid (0.5 M HCl)  
[1:01:44] Stepping pH = 3.87  
[1:01:44] Dispensed 0.000094 mL of Acid (0.5 M HCl)  
[1:01:49] Stepping pH = 3.81  
[1:01:49] Dispensed 0.000047 mL of Acid (0.5 M HCl)  
[1:01:54] Stepping pH = 3.78  
[1:01:54] Dispensed 0.000024 mL of Acid (0.5 M HCl)  
[1:01:59] Stepping pH = 3.78  
[1:02:14] Stirrer speed set to 0  
[1:02:25] Datapoint id 67 collected  
[1:02:25] Charge balance equation is out by -15.5%  
[1:02:25] Stirrer speed set to 55  
[1:02:30] pH 3.77 -> 3.57  
[1:02:30] Using cautious pH adjust  
[1:02:30] Dispensed 0.000212 mL of Acid (0.5 M HCl)  
[1:02:35] Stepping pH = 3.66  
[1:02:35] Dispensed 0.000141 mL of Acid (0.5 M HCl)

Sample name: **M08\_octanol**  
Assay name: **pH-metric high logP**  
Assay ID: **18C-02007**  
Filename: **C:\Sirius\_T3\Mehtap\20180302\_exp29\_logP\_T3-2\18C-02007\_M08\_octanol\_pH-metric high logP.t3r**

Experiment start time: **3/2/2018 5:10:52 PM**  
Analyst: **Pion**  
Instrument ID: **T312060**

## Experiment Log (continued)

[1:02:40] Stepping pH = 3.61  
[1:02:41] Dispensed 0.000094 mL of Acid (0.5 M HCl)  
[1:02:46] Stepping pH = 3.58  
[1:03:01] Stirrer speed set to 0  
[1:03:11] Datapoint id 68 collected  
[1:03:11] Charge balance equation is out by -6.3%  
[1:03:11] Stirrer speed set to 55  
[1:03:16] pH 3.57 -> 3.37  
[1:03:16] Using charge balance adjust  
[1:03:16] Dispensed 0.000659 mL of Acid (0.5 M HCl)  
[1:03:36] Stirrer speed set to 0  
[1:03:46] Datapoint id 69 collected  
[1:03:46] Charge balance equation is out by -2.7%  
[1:03:46] Stirrer speed set to 55  
[1:03:51] pH 3.37 -> 3.17  
[1:03:51] Using charge balance adjust  
[1:03:51] Dispensed 0.001035 mL of Acid (0.5 M HCl)  
[1:04:12] Stirrer speed set to 0  
[1:04:22] Datapoint id 70 collected  
[1:04:22] Charge balance equation is out by -8.0%  
[1:04:22] Stirrer speed set to 55  
[1:04:27] pH 3.19 -> 2.99  
[1:04:27] Using charge balance adjust  
[1:04:27] Dispensed 0.001576 mL of Acid (0.5 M HCl)  
[1:04:47] Stirrer speed set to 0  
[1:04:57] Datapoint id 71 collected  
[1:04:57] Charge balance equation is out by -5.6%  
[1:04:57] Stirrer speed set to 55  
[1:05:02] pH 3.01 -> 2.81  
[1:05:02] Using charge balance adjust  
[1:05:02] Dispensed 0.002446 mL of Acid (0.5 M HCl)  
[1:05:23] Stirrer speed set to 0  
[1:05:33] Datapoint id 72 collected  
[1:05:33] Charge balance equation is out by -1.4%  
[1:05:33] Stirrer speed set to 55  
[1:05:38] pH 2.81 -> 2.61  
[1:05:38] Using charge balance adjust  
[1:05:38] Dispensed 0.003833 mL of Acid (0.5 M HCl)  
[1:05:58] Stirrer speed set to 0  
[1:06:08] Datapoint id 73 collected  
[1:06:08] Charge balance equation is out by -0.1%  
[1:06:08] Stirrer speed set to 55  
[1:06:13] pH 2.61 -> 2.41  
[1:06:13] Using charge balance adjust  
[1:06:13] Dispensed 0.006115 mL of Acid (0.5 M HCl)  
[1:06:34] Stirrer speed set to 0  
[1:06:44] Datapoint id 74 collected  
[1:06:44] Charge balance equation is out by 5.7%  
[1:06:44] Stirrer speed set to 55  
[1:06:49] pH 2.41 -> 2.21  
[1:06:49] Using charge balance adjust  
[1:06:50] Dispensed 0.010042 mL of Acid (0.5 M HCl)  
[1:07:10] Stirrer speed set to 0  
[1:07:20] Datapoint id 75 collected  
[1:07:20] Charge balance equation is out by -0.1%  
[1:07:20] Stirrer speed set to 55  
[1:07:25] pH 2.21 -> 2.01  
[1:07:25] Using charge balance adjust  
[1:07:26] Dispensed 0.016181 mL of Acid (0.5 M HCl)



Sample name: **M08\_octanol**  
Assay name: **pH-metric high logP**  
Assay ID: **18C-02007**  
Filename: **C:\Sirius\_T3\Mehtap\20180302\_exp29\_logP\_T3-2\18C-02007\_M08\_octanol\_pH-metric high logP.t3r**

Experiment start time: **3/2/2018 5:10:52 PM**  
Analyst: **Pion**  
Instrument ID: **T312060**

## Experiment Log (continued)

[1:07:46] Stirrer speed set to 0  
[1:07:56] Datapoint id 76 collected  
[1:07:56] Charge balance equation is out by 1.9%  
[1:07:56] Stirrer speed set to 55  
[1:08:01] pH 2.01 -> 1.95  
[1:08:01] Using charge balance adjust  
[1:08:02] Dispensed 0.006491 mL of Acid (0.5 M HCl)  
[1:08:22] Stirrer speed set to 0  
[1:08:32] Datapoint id 77 collected  
[1:08:32] Charge balance equation is out by -70.0%  
[1:08:32] Titration 3 of 3  
[1:08:32] Adding initial titrants  
[1:08:32] Automatically add 0.80000 mL of Octanol  
[1:09:23] Dispensed 0.800000 mL of Octanol  
[1:09:23] Stirrer speed set to 10  
[1:09:24] Stirrer speed set to 60  
[1:09:24] Iterative adjust 1.95 -> 10.00  
[1:09:24] pH 1.95 -> 10.00  
[1:09:25] Dispensed 0.059925 mL of Base (0.5 M KOH)  
[1:10:15] Stirrer speed set to 0  
[1:10:34] Datapoint id 78 collected  
[1:10:34] Stirrer speed set to 60  
[1:10:40] pH 10.30 -> 10.10  
[1:10:40] Using cautious pH adjust  
[1:10:40] Dispensed 0.000188 mL of Acid (0.5 M HCl)  
[1:10:45] Stepping pH = 10.28  
[1:10:45] Dispensed 0.000541 mL of Acid (0.5 M HCl)  
[1:10:50] Stepping pH = 9.94  
[1:11:05] Stirrer speed set to 0  
[1:11:34] Datapoint id 79 collected  
[1:11:34] Charge balance equation is out by -81.9%  
[1:11:34] Stirrer speed set to 60  
[1:11:39] pH 9.90 -> 9.70  
[1:11:39] Using cautious pH adjust  
[1:11:39] Dispensed 0.000094 mL of Acid (0.5 M HCl)  
[1:11:44] Stepping pH = 9.90  
[1:11:44] Dispensed 0.000259 mL of Acid (0.5 M HCl)  
[1:11:50] Stepping pH = 9.63  
[1:12:05] Stirrer speed set to 0  
[1:12:15] Datapoint id 80 collected  
[1:12:15] Charge balance equation is out by -91.9%  
[1:12:15] Stirrer speed set to 60  
[1:12:20] pH 9.60 -> 9.40  
[1:12:20] Using cautious pH adjust  
[1:12:20] Dispensed 0.000047 mL of Acid (0.5 M HCl)  
[1:12:25] Stepping pH = 9.60  
[1:12:25] Dispensed 0.000165 mL of Acid (0.5 M HCl)  
[1:12:30] Stepping pH = 9.43  
[1:12:30] Dispensed 0.000024 mL of Acid (0.5 M HCl)  
[1:12:35] Stepping pH = 9.42  
[1:12:35] Dispensed 0.000024 mL of Acid (0.5 M HCl)  
[1:12:40] Stepping pH = 9.40  
[1:12:55] Stirrer speed set to 0  
[1:13:05] Datapoint id 81 collected  
[1:13:05] Charge balance equation is out by -132.7%  
[1:13:05] Stirrer speed set to 60  
[1:13:11] pH 9.37 -> 9.17  
[1:13:11] Using cautious pH adjust  
[1:13:11] Dispensed 0.000047 mL of Acid (0.5 M HCl)

Sample name: **M08\_octanol**  
Assay name: **pH-metric high logP**  
Assay ID: **18C-02007**  
Filename: **C:\Sirius\_T3\Mehtap\20180302\_exp29\_logP\_T3-2\18C-02007\_M08\_octanol\_pH-metric high logP.t3r**

Experiment start time: **3/2/2018 5:10:52 PM**  
Analyst: **Pion**  
Instrument ID: **T312060**

## Experiment Log (continued)

[1:13:16] Stepping pH = 9.36  
[1:13:16] Dispensed 0.000118 mL of Acid (0.5 M HCl)  
[1:13:21] Stepping pH = 9.14  
[1:13:36] Stirrer speed set to 0  
[1:13:47] Datapoint id 82 collected  
[1:13:47] Charge balance equation is out by -88.9%  
[1:13:47] Stirrer speed set to 60  
[1:13:53] pH 9.10 -> 8.90  
[1:13:53] Using cautious pH adjust  
[1:13:53] Dispensed 0.000047 mL of Acid (0.5 M HCl)  
[1:13:58] Stepping pH = 9.08  
[1:13:58] Dispensed 0.000118 mL of Acid (0.5 M HCl)  
[1:14:03] Stepping pH = 8.86  
[1:14:18] Stirrer speed set to 0  
[1:14:33] Datapoint id 83 collected  
[1:14:33] Charge balance equation is out by -89.5%  
[1:14:33] Stirrer speed set to 60  
[1:14:38] pH 8.81 -> 8.61  
[1:14:38] Using cautious pH adjust  
[1:14:38] Dispensed 0.000047 mL of Acid (0.5 M HCl)  
[1:14:43] Stepping pH = 8.80  
[1:14:43] Dispensed 0.000165 mL of Acid (0.5 M HCl)  
[1:14:48] Stepping pH = 8.51  
[1:15:04] Stirrer speed set to 0  
[1:15:26] Datapoint id 84 collected  
[1:15:26] Charge balance equation is out by -94.1%  
[1:15:26] Stirrer speed set to 60  
[1:15:31] pH 8.48 -> 8.28  
[1:15:31] Using cautious pH adjust  
[1:15:31] Dispensed 0.000094 mL of Acid (0.5 M HCl)  
[1:15:36] Stepping pH = 8.44  
[1:15:36] Dispensed 0.000188 mL of Acid (0.5 M HCl)  
[1:15:41] Stepping pH = 8.22  
[1:15:56] Stirrer speed set to 0  
[1:16:20] Datapoint id 85 collected  
[1:16:20] Charge balance equation is out by -44.0%  
[1:16:20] Stirrer speed set to 60  
[1:16:25] pH 8.19 -> 7.99  
[1:16:25] Using cautious pH adjust  
[1:16:25] Dispensed 0.000165 mL of Acid (0.5 M HCl)  
[1:16:30] Stepping pH = 8.11  
[1:16:30] Dispensed 0.000165 mL of Acid (0.5 M HCl)  
[1:16:35] Stepping pH = 8.01  
[1:16:35] Dispensed 0.000024 mL of Acid (0.5 M HCl)  
[1:16:40] Stepping pH = 8.00  
[1:16:40] Dispensed 0.000047 mL of Acid (0.5 M HCl)  
[1:16:45] Stepping pH = 7.99  
[1:17:00] Stirrer speed set to 0  
[1:17:23] Datapoint id 86 collected  
[1:17:23] Charge balance equation is out by -19.6%  
[1:17:23] Stirrer speed set to 60  
[1:17:28] pH 7.97 -> 7.77  
[1:17:28] Using cautious pH adjust  
[1:17:28] Dispensed 0.000235 mL of Acid (0.5 M HCl)  
[1:17:33] Stepping pH = 7.85  
[1:17:33] Dispensed 0.000141 mL of Acid (0.5 M HCl)  
[1:17:38] Stepping pH = 7.79  
[1:17:38] Dispensed 0.000047 mL of Acid (0.5 M HCl)  
[1:17:43] Stepping pH = 7.79



Sample name: **M08\_octanol**  
Assay name: **pH-metric high logP**  
Assay ID: **18C-02007**  
Filename: **C:\Sirius\_T3\Mehtap\20180302\_exp29\_logP\_T3-2\18C-02007\_M08\_octanol\_pH-metric high logP.t3r**

Experiment start time: **3/2/2018 5:10:52 PM**  
Analyst: **Pion**  
Instrument ID: **T312060**

## Experiment Log (continued)

[1:17:43] Dispensed 0.000047 mL of Acid (0.5 M HCl)  
[1:17:48] Stepping pH = 7.78  
[1:18:03] Stirrer speed set to 0  
[1:18:26] Datapoint id 87 collected  
[1:18:26] Charge balance equation is out by 3.4%  
[1:18:26] Stirrer speed set to 60  
[1:18:31] pH 7.76 -> 7.56  
[1:18:31] Using charge balance adjust  
[1:18:31] Dispensed 0.000659 mL of Acid (0.5 M HCl)  
[1:18:51] Stirrer speed set to 0  
[1:19:12] Datapoint id 88 collected  
[1:19:12] Charge balance equation is out by 13.2%  
[1:19:12] Stirrer speed set to 60  
[1:19:17] pH 7.52 -> 7.32  
[1:19:17] Using charge balance adjust  
[1:19:17] Dispensed 0.000870 mL of Acid (0.5 M HCl)  
[1:19:37] Stirrer speed set to 0  
[1:20:00] Datapoint id 89 collected  
[1:20:00] Charge balance equation is out by 2.1%  
[1:20:00] Stirrer speed set to 60  
[1:20:05] pH 7.30 -> 7.10  
[1:20:05] Using charge balance adjust  
[1:20:05] Dispensed 0.000988 mL of Acid (0.5 M HCl)  
[1:20:26] Stirrer speed set to 0  
[1:20:50] Datapoint id 90 collected  
[1:20:50] Charge balance equation is out by -5.8%  
[1:20:50] Stirrer speed set to 60  
[1:20:55] pH 7.09 -> 6.89  
[1:20:55] Using charge balance adjust  
[1:20:55] Dispensed 0.001011 mL of Acid (0.5 M HCl)  
[1:21:15] Stirrer speed set to 0  
[1:21:38] Datapoint id 91 collected  
[1:21:38] Charge balance equation is out by -9.0%  
[1:21:38] Stirrer speed set to 60  
[1:21:43] pH 6.88 -> 6.68  
[1:21:43] Using charge balance adjust  
[1:21:43] Dispensed 0.000917 mL of Acid (0.5 M HCl)  
[1:22:04] Stirrer speed set to 0  
[1:22:33] Datapoint id 92 collected  
[1:22:33] Charge balance equation is out by -16.1%  
[1:22:33] Stirrer speed set to 60  
[1:22:38] pH 6.67 -> 6.47  
[1:22:38] Using cautious pH adjust  
[1:22:38] Dispensed 0.000376 mL of Acid (0.5 M HCl)  
[1:22:43] Stepping pH = 6.57  
[1:22:43] Dispensed 0.000259 mL of Acid (0.5 M HCl)  
[1:22:48] Stepping pH = 6.50  
[1:22:48] Dispensed 0.000094 mL of Acid (0.5 M HCl)  
[1:22:53] Stepping pH = 6.48  
[1:22:53] Dispensed 0.000047 mL of Acid (0.5 M HCl)  
[1:22:58] Stepping pH = 6.47  
[1:23:13] Stirrer speed set to 0  
[1:23:43] Datapoint id 93 collected  
[1:23:43] Charge balance equation is out by -7.8%  
[1:23:43] Stirrer speed set to 60  
[1:23:48] pH 6.47 -> 6.27  
[1:23:48] Using charge balance adjust  
[1:23:48] Dispensed 0.000564 mL of Acid (0.5 M HCl)  
[1:24:08] Stirrer speed set to 0

Sample name: **M08\_octanol**  
Assay name: **pH-metric high logP**  
Assay ID: **18C-02007**  
Filename: **C:\Sirius\_T3\Mehtap\20180302\_exp29\_logP\_T3-2\18C-02007\_M08\_octanol\_pH-metric high logP.t3r**

Experiment start time: **3/2/2018 5:10:52 PM**  
Analyst: **Pion**  
Instrument ID: **T312060**

## Experiment Log (continued)

[1:24:40] Datapoint id 94 collected  
[1:24:40] Charge balance equation is out by -25.7%  
[1:24:40] Stirrer speed set to 60  
[1:24:45] pH 6.26 -> 6.06  
[1:24:45] Using cautious pH adjust  
[1:24:45] Dispensed 0.000212 mL of Acid (0.5 M HCl)  
[1:24:50] Stepping pH = 6.18  
[1:24:50] Dispensed 0.000165 mL of Acid (0.5 M HCl)  
[1:24:55] Stepping pH = 6.10  
[1:24:55] Dispensed 0.000071 mL of Acid (0.5 M HCl)  
[1:25:01] Stepping pH = 6.07  
[1:25:16] Stirrer speed set to 0  
[1:25:47] Datapoint id 95 collected  
[1:25:47] Charge balance equation is out by -6.6%  
[1:25:47] Stirrer speed set to 60  
[1:25:52] pH 6.08 -> 5.88  
[1:25:52] Using charge balance adjust  
[1:25:52] Dispensed 0.000282 mL of Acid (0.5 M HCl)  
[1:26:13] Stirrer speed set to 0  
[1:26:32] Datapoint id 96 collected  
[1:26:32] Charge balance equation is out by -37.9%  
[1:26:32] Stirrer speed set to 60  
[1:26:37] pH 5.89 -> 5.69  
[1:26:37] Using cautious pH adjust  
[1:26:37] Dispensed 0.000094 mL of Acid (0.5 M HCl)  
[1:26:42] Stepping pH = 5.84  
[1:26:42] Dispensed 0.000141 mL of Acid (0.5 M HCl)  
[1:26:47] Stepping pH = 5.71  
[1:26:47] Dispensed 0.000024 mL of Acid (0.5 M HCl)  
[1:26:52] Stepping pH = 5.70  
[1:27:07] Stirrer speed set to 0  
[1:27:26] Datapoint id 97 collected  
[1:27:26] Charge balance equation is out by -33.9%  
[1:27:26] Stirrer speed set to 60  
[1:27:31] pH 5.69 -> 5.49  
[1:27:31] Using cautious pH adjust  
[1:27:31] Dispensed 0.000071 mL of Acid (0.5 M HCl)  
[1:27:36] Stepping pH = 5.64  
[1:27:36] Dispensed 0.000118 mL of Acid (0.5 M HCl)  
[1:27:41] Stepping pH = 5.45  
[1:27:56] Stirrer speed set to 0  
[1:28:14] Datapoint id 98 collected  
[1:28:14] Charge balance equation is out by -30.0%  
[1:28:14] Stirrer speed set to 60  
[1:28:19] pH 5.45 -> 5.25  
[1:28:19] Using cautious pH adjust  
[1:28:19] Dispensed 0.000047 mL of Acid (0.5 M HCl)  
[1:28:24] Stepping pH = 5.42  
[1:28:24] Dispensed 0.000094 mL of Acid (0.5 M HCl)  
[1:28:29] Stepping pH = 5.22  
[1:28:44] Stirrer speed set to 0  
[1:29:01] Datapoint id 99 collected  
[1:29:01] Charge balance equation is out by -55.8%  
[1:29:01] Stirrer speed set to 60  
[1:29:07] pH 5.20 -> 5.00  
[1:29:07] Using cautious pH adjust  
[1:29:07] Dispensed 0.000024 mL of Acid (0.5 M HCl)  
[1:29:12] Stepping pH = 5.19  
[1:29:12] Dispensed 0.000094 mL of Acid (0.5 M HCl)

Sample name: **M08\_octanol**  
Assay name: **pH-metric high logP**  
Assay ID: **18C-02007**  
Filename: **C:\Sirius\_T3\Mehtap\20180302\_exp29\_logP\_T3-2\18C-02007\_M08\_octanol\_pH-metric high logP.t3r**

Experiment start time: **3/2/2018 5:10:52 PM**  
Analyst: **Pion**  
Instrument ID: **T312060**

## Experiment Log (continued)

[1:29:17] Stepping pH = 4.93  
[1:29:32] Stirrer speed set to 0  
[1:29:54] Datapoint id 100 collected  
[1:29:54] Charge balance equation is out by -94.2%  
[1:29:54] Stirrer speed set to 60  
[1:29:59] pH 4.89 -> 4.69  
[1:29:59] Using cautious pH adjust  
[1:29:59] Dispensed 0.000024 mL of Acid (0.5 M HCl)  
[1:30:04] Stepping pH = 4.89  
[1:30:04] Dispensed 0.000071 mL of Acid (0.5 M HCl)  
[1:30:09] Stepping pH = 4.71  
[1:30:09] Dispensed 0.000024 mL of Acid (0.5 M HCl)  
[1:30:14] Stepping pH = 4.65  
[1:30:30] Stirrer speed set to 0  
[1:30:47] Datapoint id 101 collected  
[1:30:47] Charge balance equation is out by -132.2%  
[1:30:47] Stirrer speed set to 60  
[1:30:52] pH 4.63 -> 4.43  
[1:30:52] Using cautious pH adjust  
[1:30:52] Dispensed 0.000047 mL of Acid (0.5 M HCl)  
[1:30:57] Stepping pH = 4.56  
[1:30:57] Dispensed 0.000047 mL of Acid (0.5 M HCl)  
[1:31:03] Stepping pH = 4.46  
[1:31:03] Dispensed 0.000024 mL of Acid (0.5 M HCl)  
[1:31:08] Stepping pH = 4.42  
[1:31:23] Stirrer speed set to 0  
[1:31:34] Datapoint id 102 collected  
[1:31:34] Charge balance equation is out by -38.2%  
[1:31:34] Stirrer speed set to 60  
[1:31:39] pH 4.41 -> 4.21  
[1:31:39] Using cautious pH adjust  
[1:31:39] Dispensed 0.000047 mL of Acid (0.5 M HCl)  
[1:31:44] Stepping pH = 4.38  
[1:31:44] Dispensed 0.000118 mL of Acid (0.5 M HCl)  
[1:31:49] Stepping pH = 4.16  
[1:32:04] Stirrer speed set to 0  
[1:32:14] Datapoint id 103 collected  
[1:32:14] Charge balance equation is out by -54.7%  
[1:32:14] Stirrer speed set to 60  
[1:32:19] pH 4.15 -> 3.95  
[1:32:19] Using cautious pH adjust  
[1:32:20] Dispensed 0.000094 mL of Acid (0.5 M HCl)  
[1:32:25] Stepping pH = 4.07  
[1:32:25] Dispensed 0.000094 mL of Acid (0.5 M HCl)  
[1:32:30] Stepping pH = 3.98  
[1:32:30] Dispensed 0.000024 mL of Acid (0.5 M HCl)  
[1:32:35] Stepping pH = 3.96  
[1:32:50] Stirrer speed set to 0  
[1:33:00] Datapoint id 104 collected  
[1:33:00] Charge balance equation is out by -11.2%  
[1:33:00] Stirrer speed set to 60  
[1:33:05] pH 3.95 -> 3.75  
[1:33:05] Using charge balance adjust  
[1:33:05] Dispensed 0.000306 mL of Acid (0.5 M HCl)  
[1:33:25] Stirrer speed set to 0  
[1:33:44] Datapoint id 105 collected  
[1:33:44] Charge balance equation is out by 5.1%  
[1:33:44] Stirrer speed set to 60  
[1:33:49] pH 3.74 -> 3.54

Sample name: **M08\_octanol**  
Assay name: **pH-metric high logP**  
Assay ID: **18C-02007**  
Filename: **C:\Sirius\_T3\Mehtap\20180302\_exp29\_logP\_T3-2\18C-02007\_M08\_octanol\_pH-metric high logP.t3r**

Experiment start time: **3/2/2018 5:10:52 PM**  
Analyst: **Pion**  
Instrument ID: **T312060**

## Experiment Log (continued)

[1:33:49] Using charge balance adjust  
[1:33:49] Dispensed 0.000470 mL of Acid (0.5 M HCl)  
[1:34:09] Stirrer speed set to 0  
[1:34:19] Datapoint id 106 collected  
[1:34:19] Charge balance equation is out by -1.6%  
[1:34:19] Stirrer speed set to 60  
[1:34:24] pH 3.54 -> 3.34  
[1:34:24] Using charge balance adjust  
[1:34:25] Dispensed 0.000753 mL of Acid (0.5 M HCl)  
[1:34:45] Stirrer speed set to 0  
[1:34:55] Datapoint id 107 collected  
[1:34:55] Charge balance equation is out by 2.6%  
[1:34:55] Stirrer speed set to 60  
[1:35:00] pH 3.34 -> 3.14  
[1:35:00] Using charge balance adjust  
[1:35:00] Dispensed 0.001199 mL of Acid (0.5 M HCl)  
[1:35:20] Stirrer speed set to 0  
[1:35:30] Datapoint id 108 collected  
[1:35:30] Charge balance equation is out by 2.0%  
[1:35:30] Stirrer speed set to 60  
[1:35:35] pH 3.14 -> 2.94  
[1:35:35] Using charge balance adjust  
[1:35:36] Dispensed 0.001905 mL of Acid (0.5 M HCl)  
[1:35:56] Stirrer speed set to 0  
[1:36:06] Datapoint id 109 collected  
[1:36:06] Charge balance equation is out by -1.1%  
[1:36:06] Stirrer speed set to 60  
[1:36:11] pH 2.95 -> 2.75  
[1:36:11] Using charge balance adjust  
[1:36:11] Dispensed 0.002987 mL of Acid (0.5 M HCl)  
[1:36:31] Stirrer speed set to 0  
[1:36:56] Datapoint id 110 collected  
[1:36:56] Charge balance equation is out by -5.0%  
[1:36:56] Stirrer speed set to 60  
[1:37:01] pH 2.76 -> 2.56  
[1:37:01] Using charge balance adjust  
[1:37:01] Dispensed 0.004610 mL of Acid (0.5 M HCl)  
[1:37:21] Stirrer speed set to 0  
[1:37:47] Datapoint id 111 collected  
[1:37:47] Charge balance equation is out by -2.3%  
[1:37:47] Stirrer speed set to 60  
[1:37:52] pH 2.57 -> 2.37  
[1:37:52] Using charge balance adjust  
[1:37:52] Dispensed 0.007244 mL of Acid (0.5 M HCl)  
[1:38:13] Stirrer speed set to 0  
[1:38:25] Datapoint id 112 collected  
[1:38:25] Charge balance equation is out by 1.1%  
[1:38:25] Stirrer speed set to 60  
[1:38:30] pH 2.38 -> 2.18  
[1:38:30] Using charge balance adjust  
[1:38:30] Dispensed 0.011571 mL of Acid (0.5 M HCl)  
[1:38:50] Stirrer speed set to 0  
[1:39:06] Datapoint id 113 collected  
[1:39:06] Charge balance equation is out by -0.0%  
[1:39:06] Stirrer speed set to 60  
[1:39:11] pH 2.18 -> 1.98  
[1:39:11] Using charge balance adjust  
[1:39:11] Dispensed 0.018650 mL of Acid (0.5 M HCl)  
[1:39:32] Stirrer speed set to 0



## Experiment Log

Sample name: **M08\_octanol** Experiment start time: **3/2/2018 5:10:52 PM**  
Assay name: **pH-metric high logP** Analyst: **Pion**  
Assay ID: **18C-02007** Instrument ID: **T312060**  
Filename: **C:\Sirius\_T3\Mehtap\20180302\_exp29\_logP\_T3-2\18C-02007\_M08\_octanol\_pH-metric high logP.t3r**

### Experiment Log (continued)

[1:39:43] Datapoint id 114 collected  
[1:39:43] Charge balance equation is out by 0.2%  
[1:39:43] Argon flow rate set to 0  
[1:39:47] Titrator arm moved over Titration position
