# Supplementary material for: Octanol-water partition coefficient measurements for the SAMPL6 Blind Prediction Challenge
Source: bioRxiv or medRxiv preprint supplement (doi:10.1101/757393), 2019-12-02
Supplement: Supplementary file [file media-2.zip]

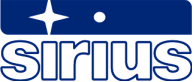

Sample name: **M16\_octanol**  
Assay name: **pH-metric high logP**  
Assay ID: **18C-01008**  
Filename: **C:\Sirius\_T3\Mehtap\20180228\_exp28\_logP\_T3-2\18C-01008\_M16\_octanol\_pH-metric high logP.t3r**

Experiment start time: **3/1/2018 10:41:05 AM**  
Analyst: **Pion**  
Instrument ID: **T312060**

## pH-metric Result

logP (XH2 +) -1.34  
logP (neutral XH) 3.04  
logP (X -) -1.62

### 18C-01008 Points 1 to 32

M16\_octanol concentration factor 0.795  
Carbonate 0.0308 mM  
Acidity error 3.10957 mM

### 18C-01008 Points 33 to 60

M16\_octanol concentration factor 0.841  
Carbonate 0.2347 mM  
Acidity error 2.72359 mM

### 18C-01008 Points 61 to 95

M16\_octanol concentration factor 0.890  
Carbonate 0.3111 mM  
Acidity error 2.55032 mM

## Warnings and errors

Errors None  
Warnings User stopped refinement before final result convergence occurred

## Sample logD and percent species

| pH     | M16_octanol<br>logD | M16_octanol<br>M16_octanolH2 | M16_octanol<br>M16_octanolH | M16_octanol<br>M16_octanol | M16_octanol<br>M16_octanolH2* | M16_octanol<br>M16_octanolH* | M16_octanol<br>M16_octanol* | Comment       |
|--------|---------------------|------------------------------|-----------------------------|----------------------------|-------------------------------|------------------------------|-----------------------------|---------------|
| 1.000  | -0.58               | 79.04 %                      | 0.02 %                      | 0.00 %                     | 3.57 %                        | 17.37 %                      | 0.00 %                      | Stomach<br>pH |
| 1.200  | -0.41               | 71.75 %                      | 0.02 %                      | 0.00 %                     | 3.24 %                        | 24.99 %                      | 0.00 %                      |               |
| 2.000  | 0.35                | 30.82 %                      | 0.06 %                      | 0.00 %                     | 1.39 %                        | 67.73 %                      | 0.00 %                      |               |
| 3.000  | 1.33                | 4.34 %                       | 0.09 %                      | 0.00 %                     | 0.20 %                        | 95.38 %                      | 0.00 %                      | Blood pH      |
| 4.000  | 2.26                | 0.45 %                       | 0.09 %                      | 0.00 %                     | 0.02 %                        | 99.44 %                      | 0.00 %                      |               |
| 5.000  | 2.87                | 0.05 %                       | 0.09 %                      | 0.00 %                     | 0.00 %                        | 99.86 %                      | 0.00 %                      |               |
| 6.000  | 3.02                | 0.00 %                       | 0.09 %                      | 0.00 %                     | 0.00 %                        | 99.90 %                      | 0.00 %                      |               |
| 6.500  | 3.03                | 0.00 %                       | 0.09 %                      | 0.00 %                     | 0.00 %                        | 99.91 %                      | 0.00 %                      |               |
| 7.000  | 3.03                | 0.00 %                       | 0.09 %                      | 0.00 %                     | 0.00 %                        | 99.91 %                      | 0.00 %                      |               |
| 7.400  | 3.03                | 0.00 %                       | 0.09 %                      | 0.00 %                     | 0.00 %                        | 99.91 %                      | 0.00 %                      |               |
| 8.000  | 2.99                | 0.00 %                       | 0.09 %                      | 0.01 %                     | 0.00 %                        | 99.90 %                      | 0.00 %                      |               |
| 9.000  | 2.71                | 0.00 %                       | 0.09 %                      | 0.10 %                     | 0.00 %                        | 99.80 %                      | 0.00 %                      |               |
| 10.000 | 1.95                | 0.00 %                       | 0.09 %                      | 1.03 %                     | 0.00 %                        | 98.85 %                      | 0.02 %                      |               |
| 11.000 | 0.98                | 0.00 %                       | 0.08 %                      | 9.41 %                     | 0.00 %                        | 90.28 %                      | 0.23 %                      |               |
| 12.000 | -0.01               | 0.00 %                       | 0.04 %                      | 50.40 %                    | 0.00 %                        | 48.35 %                      | 1.21 %                      |               |

Sample name: **M16\_octanol**  
 Assay name: **pH-metric high logP**  
 Assay ID: **18C-01008**  
 Filename: **C:\Sirius\_T3\Mehtap\20180228\_exp28\_logP\_T3-2\18C-01008\_M16\_octanol\_pH-metric high logP.t3r**

Experiment start time: **3/1/2018 10:41:05 AM**  
 Analyst: **Pion**  
 Instrument ID: **T312060**

## Graphs

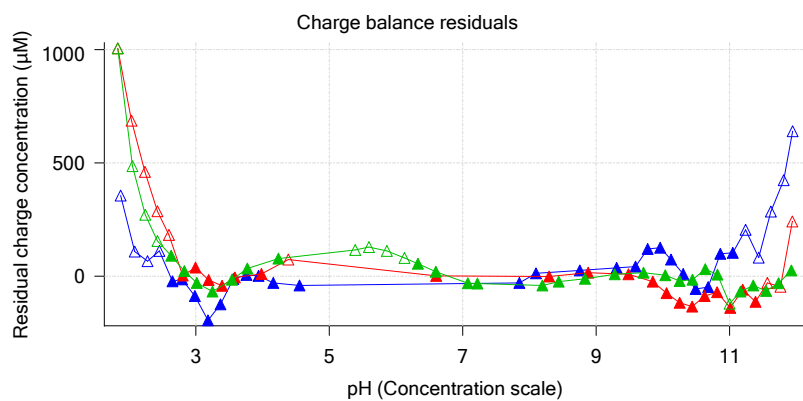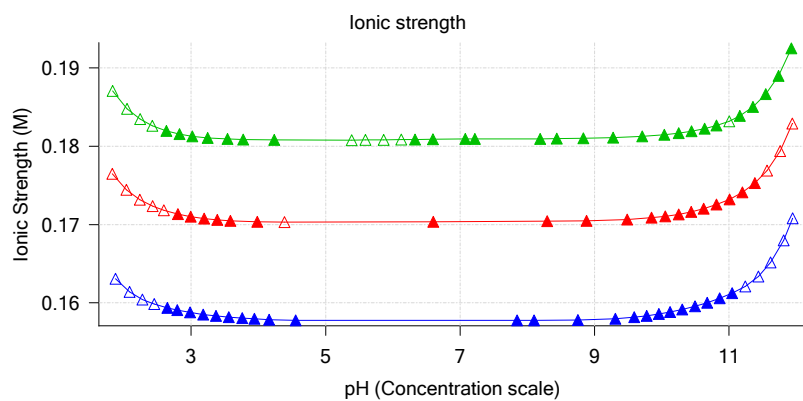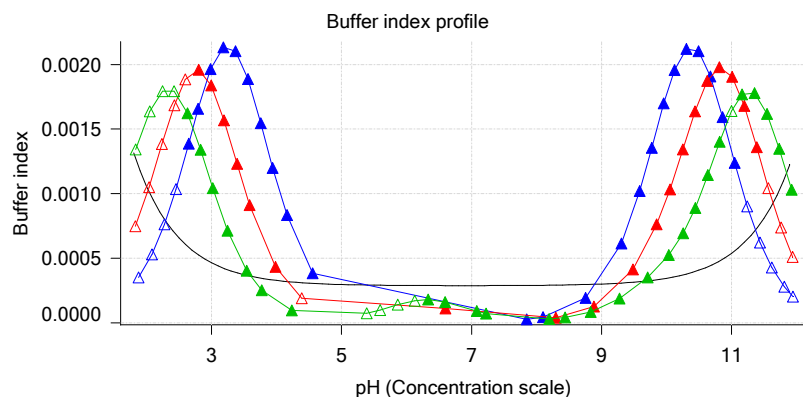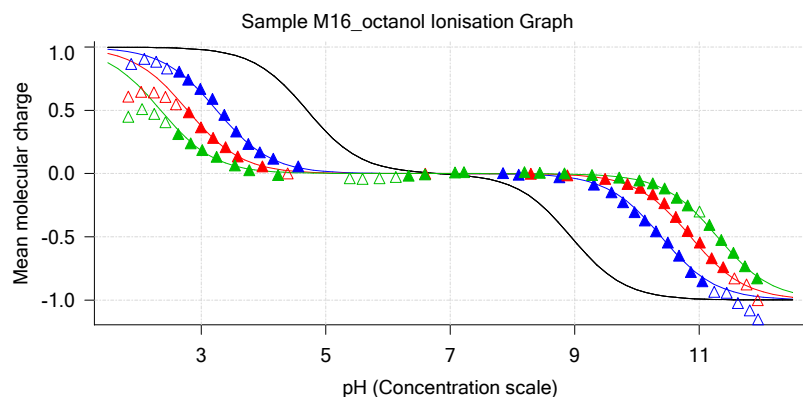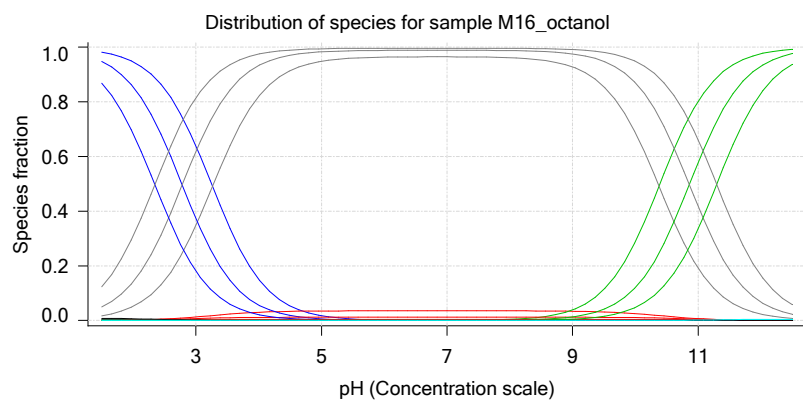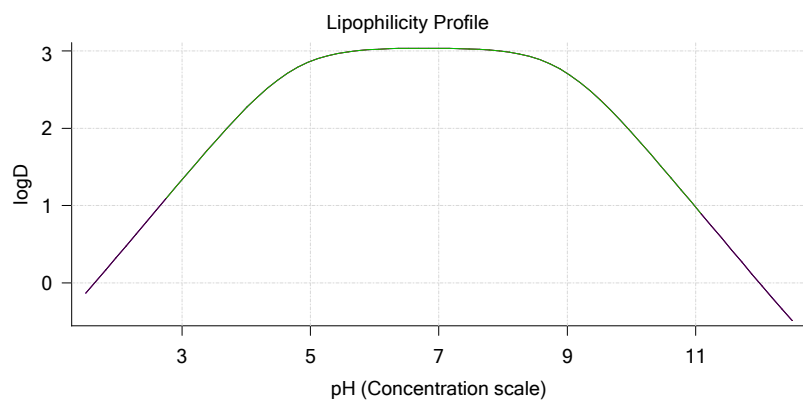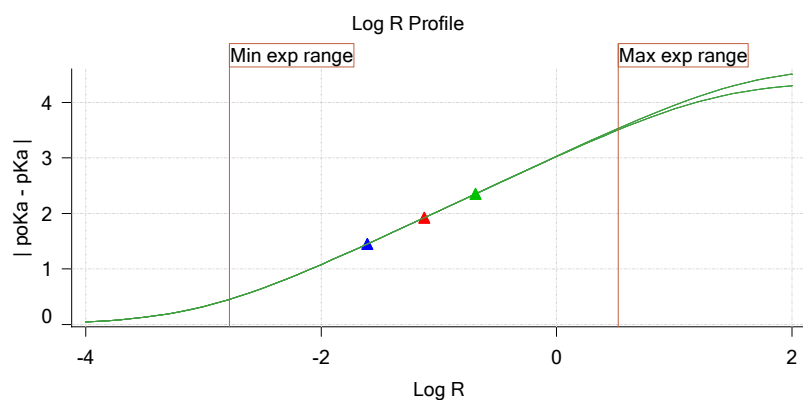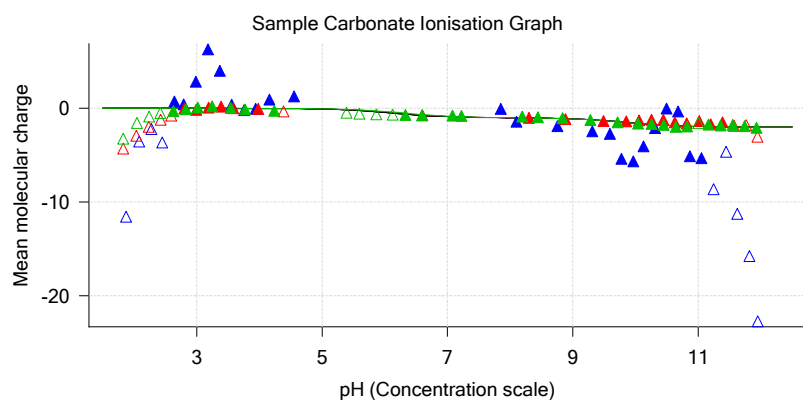

Sample name: **M16\_octanol**  
 Assay name: **pH-metric high logP**  
 Assay ID: **18C-01008**  
 Filename: **C:\Sirius\_T3\Mehtap\20180228\_exp28\_logP\_T3-2\18C-01008\_M16\_octanol\_pH-metric high logP.t3r**

Experiment start time: **3/1/2018 10:41:05 AM**  
 Analyst: **Pion**  
 Instrument ID: **T312060**

## Graphs (continued)

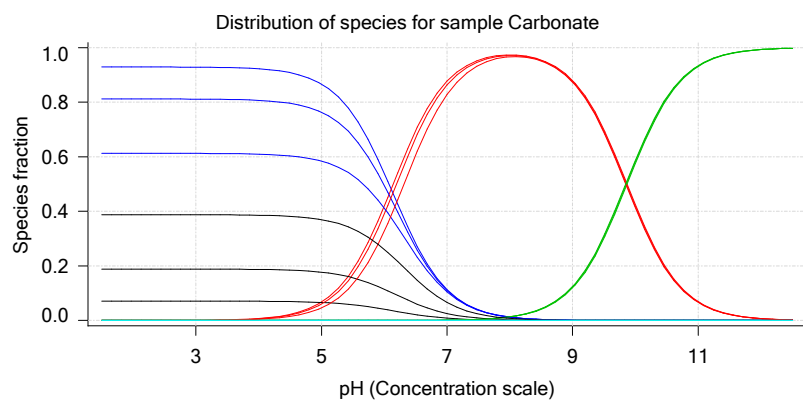

Sample name: **M16\_octanol**  
 Assay name: **pH-metric high logP**  
 Assay ID: **18C-01008**  
 Filename: **C:\Sirius\_T3\Mehtap\20180228\_exp28\_logP\_T3-2\18C-01008\_M16\_octanol\_pH-metric high logP.t3r**

Experiment start time: **3/1/2018 10:41:05 AM**  
 Analyst: **Pion**  
 Instrument ID: **T312060**

## pH-metric high logP Titration 1 of 3 18C-01008 Points 1 to 32

### Overall results

RMSD 0.203  
 Average ionic strength 0.159 M  
 Average temperature 25.0°C  
 Partition ratio 0.0247 : 1  
 Analyte concentration range 4379.7 µM to 4702.9 µM  
 Total points considered 23 of 32

### Warnings and errors

Errors None  
 Warnings Excessive acidity error present

### Four-Plus parameters

Alpha 0.130 3/1/2018 10:41:04 AM C:\Sirius\_T3\HCl18B27.t3r  
 S 0.9970 3/1/2018 10:41:04 AM C:\Sirius\_T3\HCl18B27.t3r  
 jH 0.8 3/1/2018 10:41:04 AM C:\Sirius\_T3\HCl18B27.t3r  
 jOH -0.4 3/1/2018 10:41:04 AM C:\Sirius\_T3\HCl18B27.t3r

### Titants

0.50 M HCl 0.993513 3/1/2018 10:41:05 AM C:\Sirius\_T3\HCl18B27.t3r  
 0.50 M KOH 0.999845 3/1/2018 10:41:05 AM C:\Sirius\_T3\KOH18B27.t3r

### Sample

M16\_octanol concentration factor 0.795  
 Base pKa 1 4.70  
 Acid pKa 2 8.94  
 logP (XH<sub>2</sub><sup>+</sup>) -0.95  
 logP (neutral XH) 3.01  
 logP (X<sup>-</sup>) -1.62

### Sample graphs

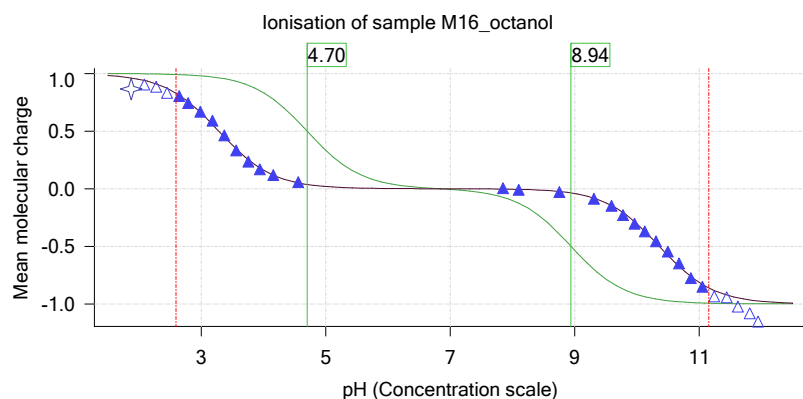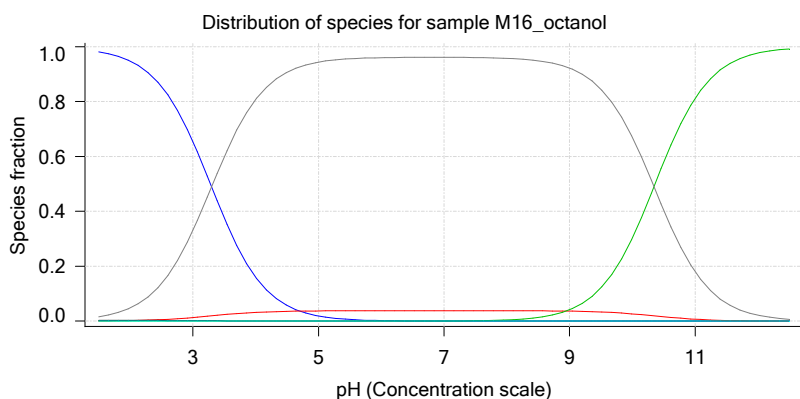

Sample name: **M16\_octanol**  
Assay name: **pH-metric high logP**  
Assay ID: **18C-01008**  
Filename: **C:\Sirius\_T3\Mehtap\20180228\_exp28\_logP\_T3-2\18C-01008\_M16\_octanol\_pH-metric high logP.t3r**

Experiment start time: **3/1/2018 10:41:05 AM**  
Analyst: **Pion**  
Instrument ID: **T312060**

## Sample graphs (continued)

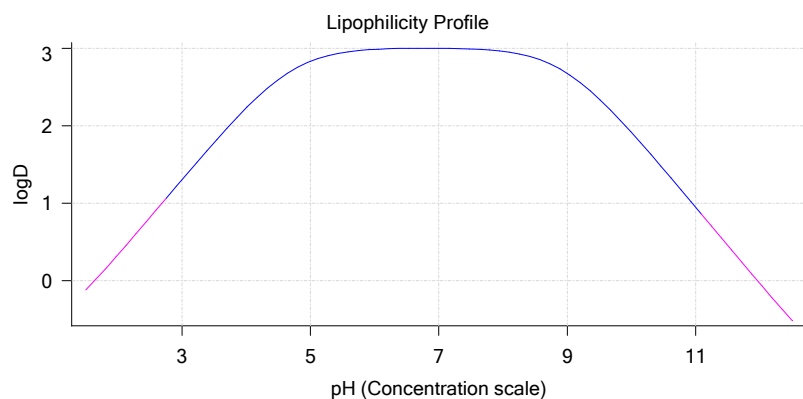

## Sample logD and percent species

| pH     | M16_octanol<br>logD | M16_octanol<br>M16_octanolH2 | M16_octanol<br>M16_octanolH | M16_octanol<br>M16_octanol | M16_octanol<br>M16_octanolH2* | M16_octanol<br>M16_octanolH* | M16_octanol<br>M16_octanol* | Comment       |
|--------|---------------------|------------------------------|-----------------------------|----------------------------|-------------------------------|------------------------------|-----------------------------|---------------|
| 1.000  | -0.50               | 99.20 %                      | 0.02 %                      | 0.00 %                     | 0.28 %                        | 0.50 %                       | 0.00 %                      | Stomach<br>pH |
| 1.200  | -0.36               | 98.90 %                      | 0.03 %                      | 0.00 %                     | 0.27 %                        | 0.79 %                       | 0.00 %                      |               |
| 2.000  | 0.33                | 94.77 %                      | 0.19 %                      | 0.00 %                     | 0.26 %                        | 4.78 %                       | 0.00 %                      |               |
| 3.000  | 1.30                | 65.49 %                      | 1.31 %                      | 0.00 %                     | 0.18 %                        | 33.02 %                      | 0.00 %                      |               |
| 4.000  | 2.23                | 16.01 %                      | 3.19 %                      | 0.00 %                     | 0.04 %                        | 80.75 %                      | 0.00 %                      |               |
| 5.000  | 2.83                | 1.87 %                       | 3.73 %                      | 0.00 %                     | 0.01 %                        | 94.39 %                      | 0.00 %                      |               |
| 6.000  | 2.99                | 0.19 %                       | 3.80 %                      | 0.00 %                     | 0.00 %                        | 96.01 %                      | 0.00 %                      | Blood pH      |
| 6.500  | 3.00                | 0.06 %                       | 3.80 %                      | 0.01 %                     | 0.00 %                        | 96.12 %                      | 0.00 %                      |               |
| 7.000  | 3.00                | 0.02 %                       | 3.80 %                      | 0.04 %                     | 0.00 %                        | 96.13 %                      | 0.00 %                      |               |
| 7.400  | 3.00                | 0.01 %                       | 3.80 %                      | 0.11 %                     | 0.00 %                        | 96.08 %                      | 0.00 %                      |               |
| 8.000  | 2.96                | 0.00 %                       | 3.79 %                      | 0.44 %                     | 0.00 %                        | 95.77 %                      | 0.00 %                      |               |
| 9.000  | 2.68                | 0.00 %                       | 3.65 %                      | 4.19 %                     | 0.00 %                        | 92.16 %                      | 0.00 %                      |               |
| 10.000 | 1.91                | 0.00 %                       | 2.65 %                      | 30.40 %                    | 0.00 %                        | 66.93 %                      | 0.02 %                      |               |
| 11.000 | 0.95                | 0.00 %                       | 0.71 %                      | 81.34 %                    | 0.00 %                        | 17.91 %                      | 0.05 %                      |               |
| 12.000 | -0.04               | 0.00 %                       | 0.09 %                      | 97.71 %                    | 0.00 %                        | 2.15 %                       | 0.06 %                      |               |

## Carbonate and acidity

Carbonate 0.031 mM  
Acidity error 3.110 mM

## Other graphs

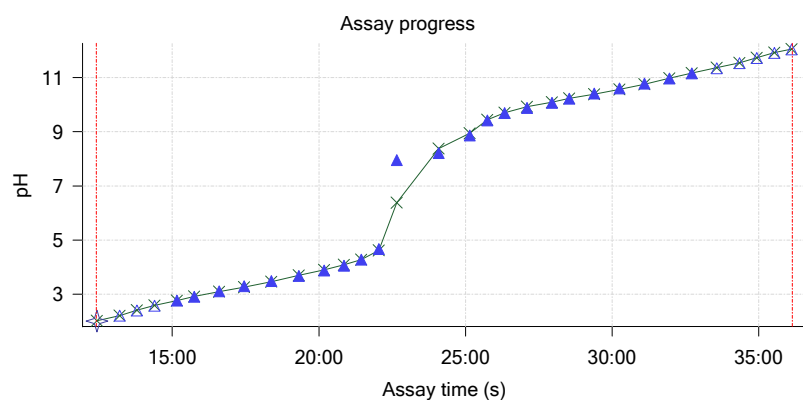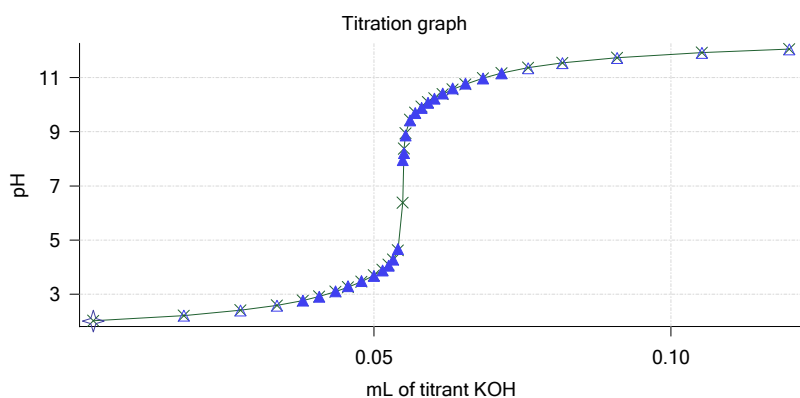

Sample name: **M16\_octanol**  
 Assay name: **pH-metric high logP**  
 Assay ID: **18C-01008**  
 Filename: **C:\Sirius\_T3\Mehtap\20180228\_exp28\_logP\_T3-2\18C-01008\_M16\_octanol\_pH-metric high logP.t3r**

Experiment start time: **3/1/2018 10:41:05 AM**  
 Analyst: **Pion**  
 Instrument ID: **T312060**

## Other graphs (continued)

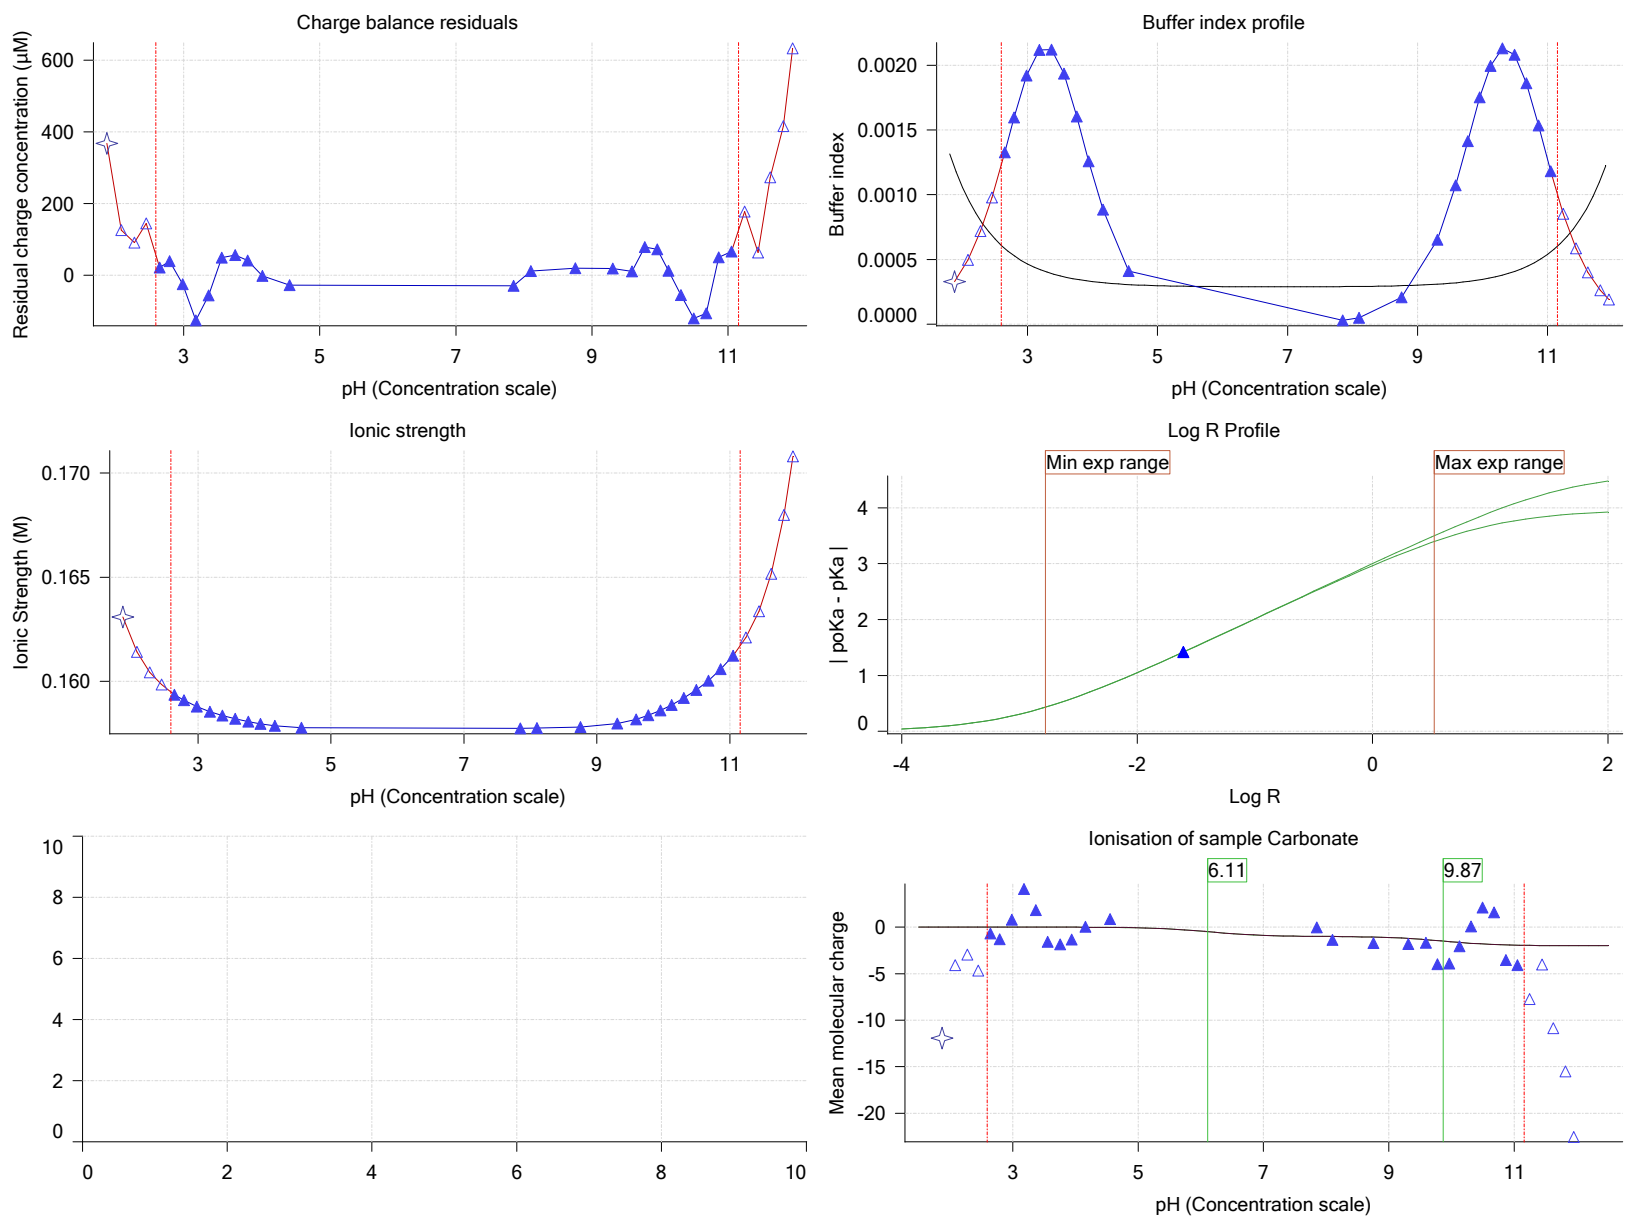

Sample name: **M16\_octanol**  
 Assay name: **pH-metric high logP**  
 Assay ID: **18C-01008**  
 Filename: **C:\Sirius\_T3\Mehtap\20180228\_exp28\_logP\_T3-2\18C-01008\_M16\_octanol\_pH-metric high logP.t3r**

Experiment start time: **3/1/2018 10:41:05 AM**  
 Analyst: **Pion**  
 Instrument ID: **T312060**

pH-metric high logP Titration 2 of 3 18C-01008 Points 33 to 60

## Overall results

RMSD 0.036  
 Average ionic strength 0.171 M  
 Average temperature 25.0°C  
 Partition ratio 0.0751 : 1  
 Analyte concentration range 3612.7 µM to 3864.7 µM  
 Total points considered 19 of 28

## Warnings and errors

Errors None  
 Warnings Excessive acidity error present

## Four-Plus parameters

Alpha 0.130 3/1/2018 10:41:04 AM C:\Sirius\_T3\HCl18B27.t3r  
 S 0.9970 3/1/2018 10:41:04 AM C:\Sirius\_T3\HCl18B27.t3r  
 jH 0.8 3/1/2018 10:41:04 AM C:\Sirius\_T3\HCl18B27.t3r  
 jOH -0.4 3/1/2018 10:41:04 AM C:\Sirius\_T3\HCl18B27.t3r

## Titrants

0.50 M HCl 0.993513 3/1/2018 10:41:05 AM C:\Sirius\_T3\HCl18B27.t3r  
 0.50 M KOH 0.999845 3/1/2018 10:41:05 AM C:\Sirius\_T3\KOH18B27.t3r

## Sample

M16\_octanol concentration factor 0.841  
 Base pKa 1 4.70  
 Acid pKa 2 8.94  
 logP (XH<sub>2</sub><sup>+</sup>) 0.31  
 logP (neutral XH) 3.10  
 logP (X<sup>-</sup>) -1.62

## Sample graphs

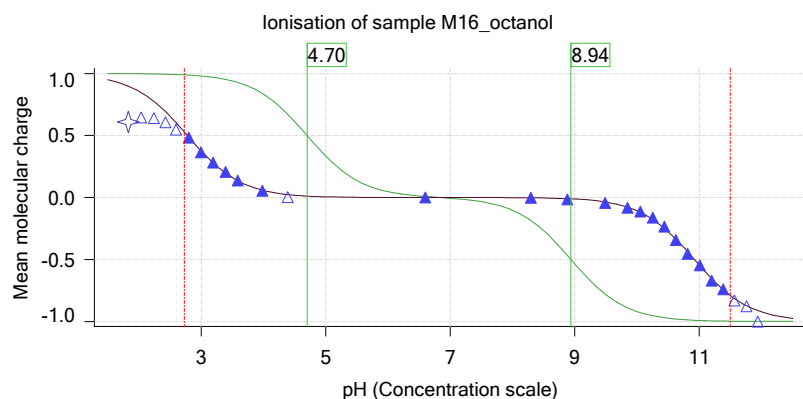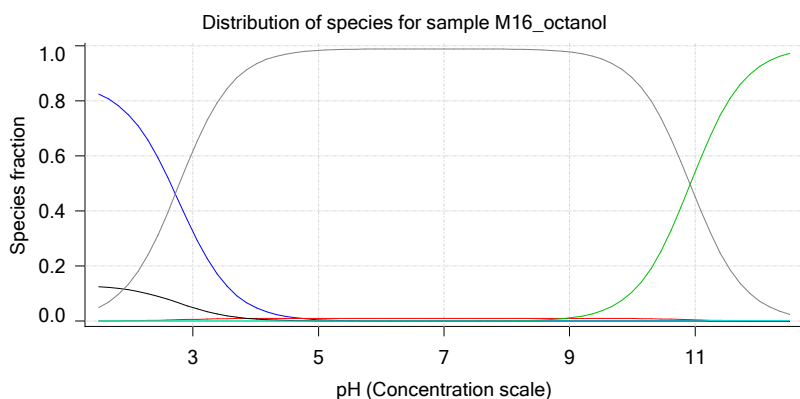

Sample name: **M16\_octanol**  
 Assay name: **pH-metric high logP**  
 Assay ID: **18C-01008**  
 Filename: **C:\Sirius\_T3\Mehtap\20180228\_exp28\_logP\_T3-2\18C-01008\_M16\_octanol\_pH-metric high logP.t3r**

Experiment start time: **3/1/2018 10:41:05 AM**  
 Analyst: **Pion**  
 Instrument ID: **T312060**

## Sample graphs (continued)

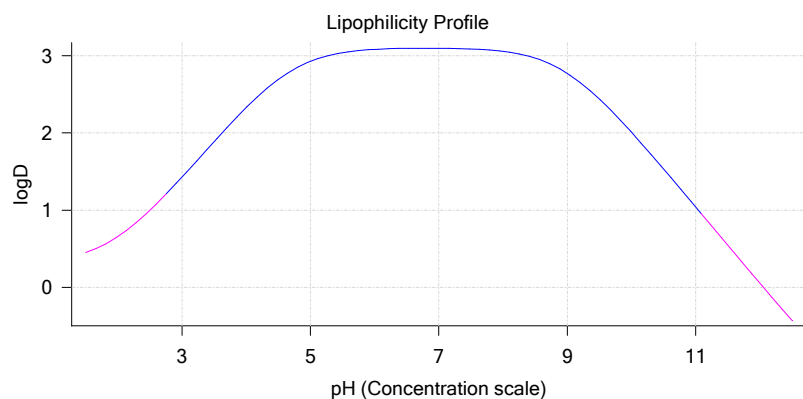

## Sample logD and percent species

| pH     | M16_octanol<br>logD | M16_octanol<br>M16_octanolH2 | M16_octanol<br>M16_octanolH | M16_octanol<br>M16_octanol | M16_octanol<br>M16_octanolH2* | M16_octanol<br>M16_octanolH* | M16_octanol<br>M16_octanol* | Comment       |
|--------|---------------------|------------------------------|-----------------------------|----------------------------|-------------------------------|------------------------------|-----------------------------|---------------|
| 1.000  | 0.36                | 85.40 %                      | 0.02 %                      | 0.00 %                     | 12.96 %                       | 1.62 %                       | 0.00 %                      | Stomach<br>pH |
| 1.200  | 0.38                | 84.59 %                      | 0.03 %                      | 0.00 %                     | 12.83 %                       | 2.55 %                       | 0.00 %                      |               |
| 2.000  | 0.66                | 74.43 %                      | 0.15 %                      | 0.00 %                     | 11.29 %                       | 14.13 %                      | 0.00 %                      |               |
| 3.000  | 1.43                | 32.57 %                      | 0.65 %                      | 0.00 %                     | 4.94 %                        | 61.84 %                      | 0.00 %                      |               |
| 4.000  | 2.33                | 4.92 %                       | 0.98 %                      | 0.00 %                     | 0.75 %                        | 93.36 %                      | 0.00 %                      |               |
| 5.000  | 2.93                | 0.52 %                       | 1.03 %                      | 0.00 %                     | 0.08 %                        | 98.37 %                      | 0.00 %                      | Blood pH      |
| 6.000  | 3.08                | 0.05 %                       | 1.04 %                      | 0.00 %                     | 0.01 %                        | 98.90 %                      | 0.00 %                      |               |
| 6.500  | 3.09                | 0.02 %                       | 1.04 %                      | 0.00 %                     | 0.00 %                        | 98.94 %                      | 0.00 %                      |               |
| 7.000  | 3.10                | 0.01 %                       | 1.04 %                      | 0.01 %                     | 0.00 %                        | 98.94 %                      | 0.00 %                      |               |
| 7.400  | 3.09                | 0.00 %                       | 1.04 %                      | 0.03 %                     | 0.00 %                        | 98.93 %                      | 0.00 %                      |               |
| 8.000  | 3.06                | 0.00 %                       | 1.04 %                      | 0.12 %                     | 0.00 %                        | 98.84 %                      | 0.00 %                      |               |
| 9.000  | 2.77                | 0.00 %                       | 1.03 %                      | 1.18 %                     | 0.00 %                        | 97.79 %                      | 0.00 %                      |               |
| 10.000 | 2.01                | 0.00 %                       | 0.93 %                      | 10.66 %                    | 0.00 %                        | 88.39 %                      | 0.02 %                      |               |
| 11.000 | 1.04                | 0.00 %                       | 0.47 %                      | 54.37 %                    | 0.00 %                        | 45.06 %                      | 0.10 %                      |               |
| 12.000 | 0.05                | 0.00 %                       | 0.08 %                      | 92.12 %                    | 0.00 %                        | 7.64 %                       | 0.17 %                      |               |

## Carbonate and acidity

Carbonate 0.235 mM  
 Acidity error 2.724 mM

## Other graphs

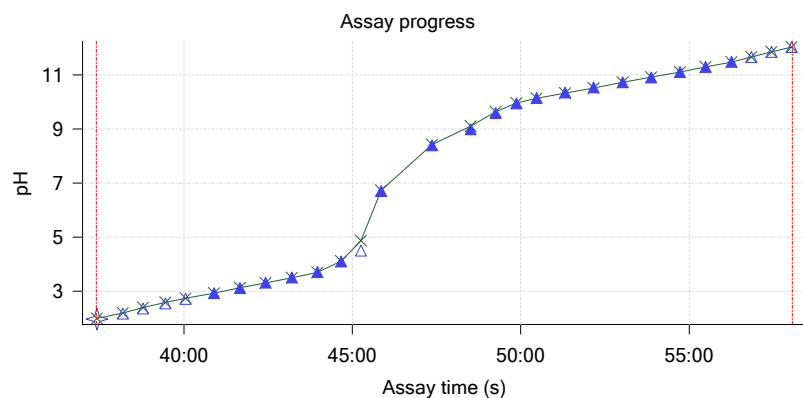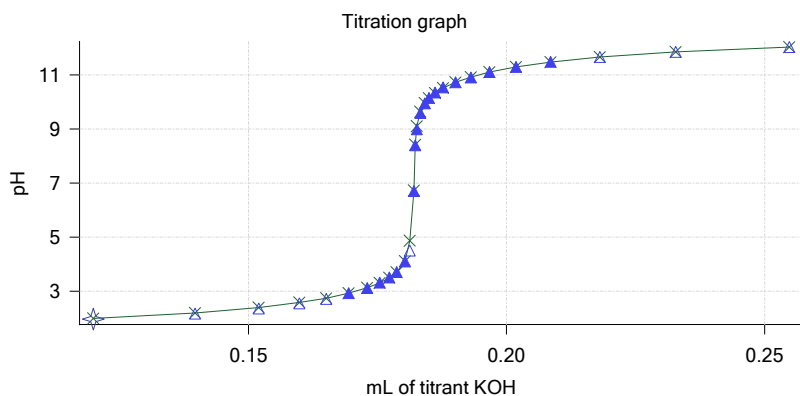



Sample name: **M16\_octanol**  
 Assay name: **pH-metric high logP**  
 Assay ID: **18C-01008**  
 Filename: **C:\Sirius\_T3\Mehtap\20180228\_exp28\_logP\_T3-2\18C-01008\_M16\_octanol\_pH-metric high logP.t3r**

Experiment start time: **3/1/2018 10:41:05 AM**  
 Analyst: **Pion**  
 Instrument ID: **T312060**

## Other graphs (continued)

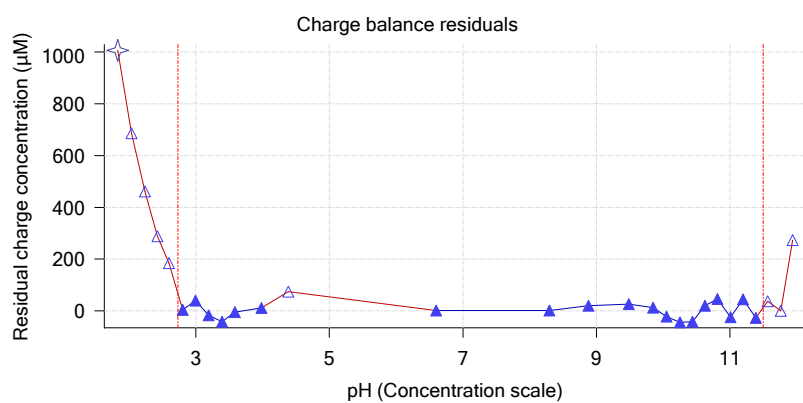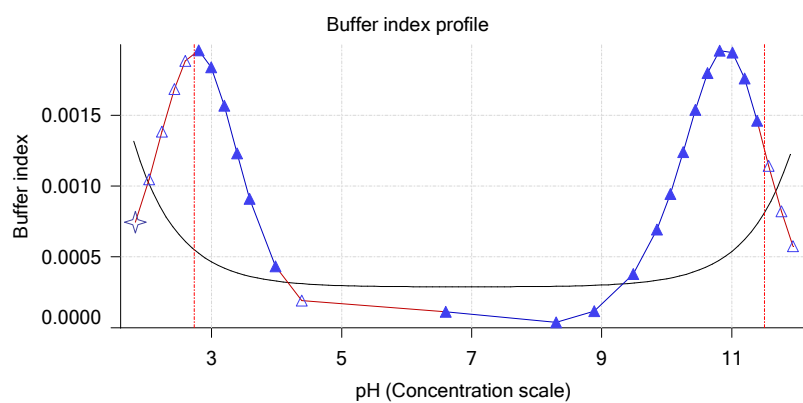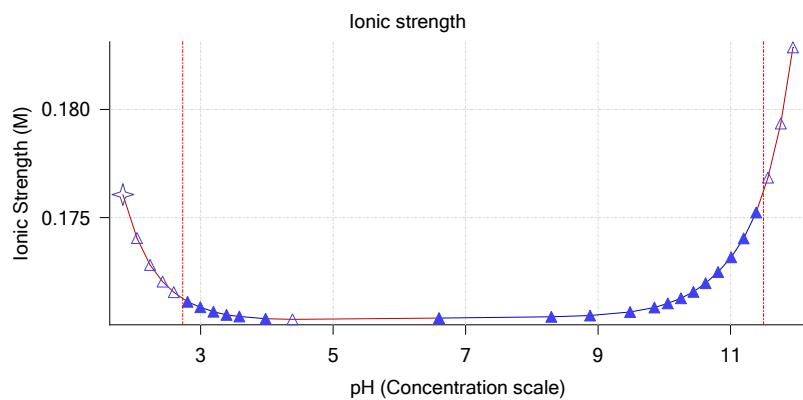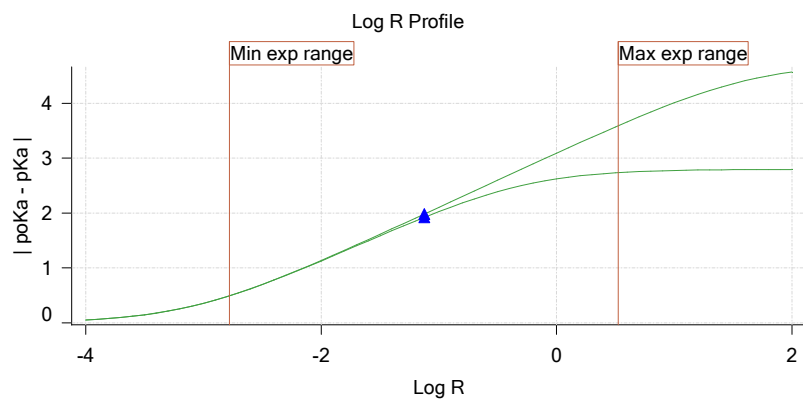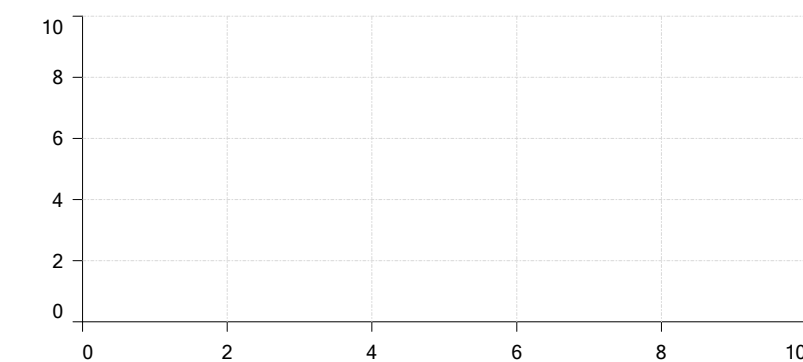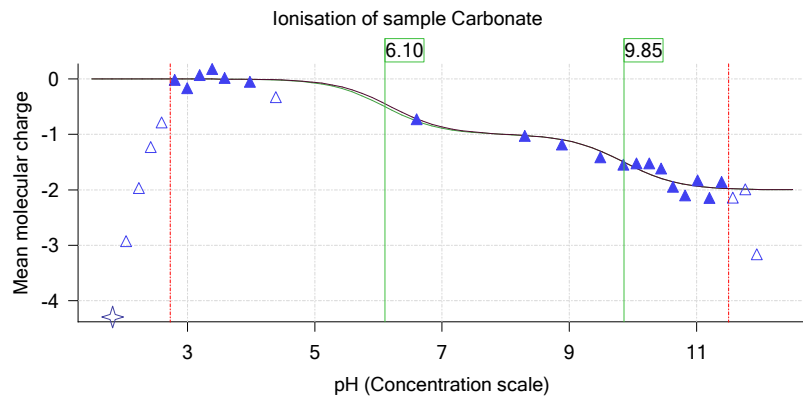

Sample name: **M16\_octanol**  
 Assay name: **pH-metric high logP**  
 Assay ID: **18C-01008**  
 Filename: **C:\Sirius\_T3\Mehtap\20180228\_exp28\_logP\_T3-2\18C-01008\_M16\_octanol\_pH-metric high logP.t3r**

Experiment start time: **3/1/2018 10:41:05 AM**  
 Analyst: **Pion**  
 Instrument ID: **T312060**

pH-metric high logP Titration 3 of 3 18C-01008 Points 61 to 95

## Overall results

RMSD 0.274  
 Average ionic strength 0.182 M  
 Average temperature 25.0°C  
 Partition ratio 0.2049 : 1  
 Analyte concentration range 2812.2 µM to 2977.4 µM  
 Total points considered 26 of 35

## Warnings and errors

Errors None  
 Warnings One or more logP values out of range  
 Excessive acidity error present

## Four-Plus parameters

Alpha 0.130 3/1/2018 10:41:04 AM C:\Sirius\_T3\HCl18B27.t3r  
 S 0.9970 3/1/2018 10:41:04 AM C:\Sirius\_T3\HCl18B27.t3r  
 jH 0.8 3/1/2018 10:41:04 AM C:\Sirius\_T3\HCl18B27.t3r  
 jOH -0.4 3/1/2018 10:41:04 AM C:\Sirius\_T3\HCl18B27.t3r

## Titrants

0.50 M HCl 0.993513 3/1/2018 10:41:05 AM C:\Sirius\_T3\HCl18B27.t3r  
 0.50 M KOH 0.999845 3/1/2018 10:41:05 AM C:\Sirius\_T3\KOH18B27.t3r

## Sample

M16\_octanol concentration factor 0.890  
 Base pKa 1 4.70  
 Acid pKa 2 8.94  
 logP (XH<sub>2</sub><sup>+</sup>) -3.82  
 logP (neutral XH) 3.06  
 logP (X<sup>-</sup>) -1.62

## Sample graphs

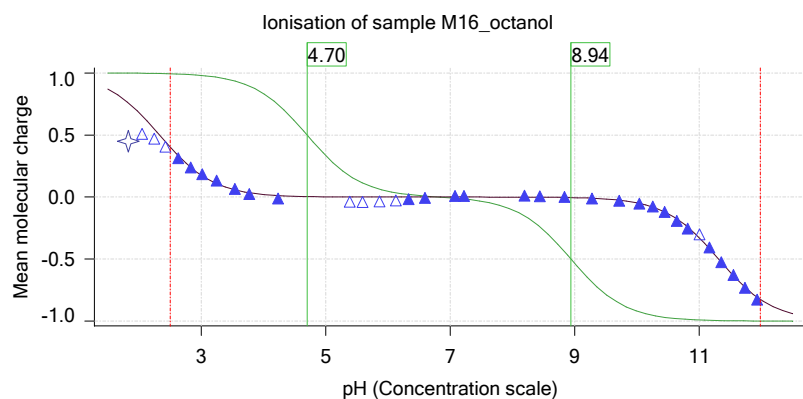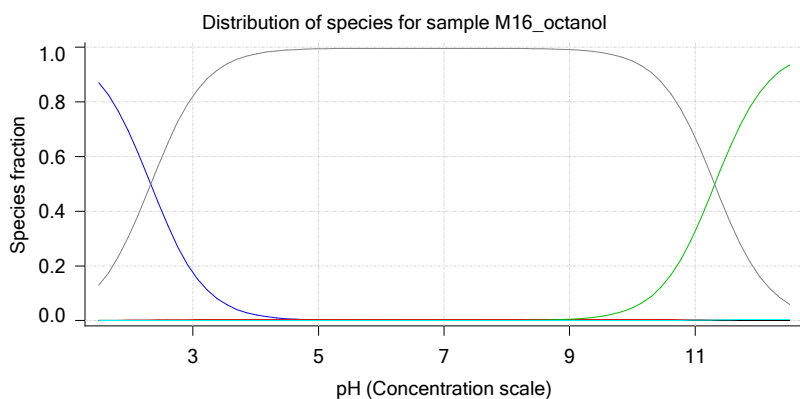

Sample name: **M16\_octanol**  
 Assay name: **pH-metric high logP**  
 Assay ID: **18C-01008**  
 Filename: **C:\Sirius\_T3\Mehtap\20180228\_exp28\_logP\_T3-2\18C-01008\_M16\_octanol\_pH-metric high logP.t3r**

Experiment start time: **3/1/2018 10:41:05 AM**  
 Analyst: **Pion**  
 Instrument ID: **T312060**

## Sample graphs (continued)

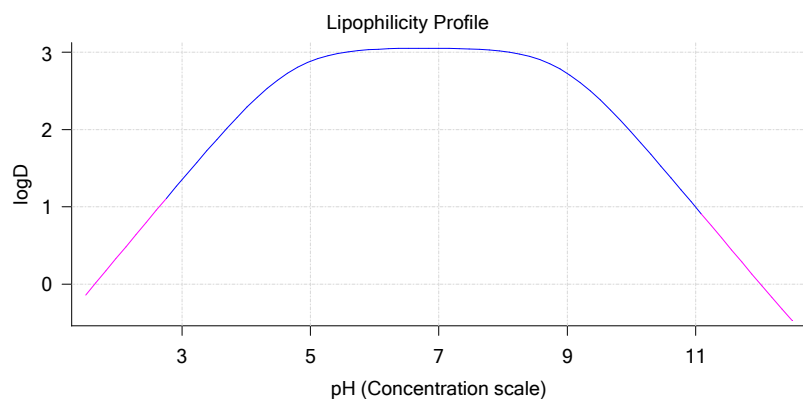

## Sample logD and percent species

| pH     | M16_octanol<br>logD | M16_octanol<br>M16_octanolH2 | M16_octanol<br>M16_octanolH | M16_octanol<br>M16_octanol | M16_octanol<br>M16_octanolH2* | M16_octanol<br>M16_octanolH* | M16_octanol<br>M16_octanol* | Comment       |
|--------|---------------------|------------------------------|-----------------------------|----------------------------|-------------------------------|------------------------------|-----------------------------|---------------|
| 1.000  | -0.64               | 95.51 %                      | 0.02 %                      | 0.00 %                     | 0.00 %                        | 4.47 %                       | 0.00 %                      | Stomach<br>pH |
| 1.200  | -0.44               | 93.06 %                      | 0.03 %                      | 0.00 %                     | 0.00 %                        | 6.91 %                       | 0.00 %                      |               |
| 2.000  | 0.36                | 68.01 %                      | 0.14 %                      | 0.00 %                     | 0.00 %                        | 31.85 %                      | 0.00 %                      |               |
| 3.000  | 1.35                | 17.53 %                      | 0.35 %                      | 0.00 %                     | 0.00 %                        | 82.12 %                      | 0.00 %                      |               |
| 4.000  | 2.28                | 2.08 %                       | 0.42 %                      | 0.00 %                     | 0.00 %                        | 97.50 %                      | 0.00 %                      | Blood pH      |
| 5.000  | 2.88                | 0.21 %                       | 0.42 %                      | 0.00 %                     | 0.00 %                        | 99.36 %                      | 0.00 %                      |               |
| 6.000  | 3.04                | 0.02 %                       | 0.42 %                      | 0.00 %                     | 0.00 %                        | 99.55 %                      | 0.00 %                      |               |
| 6.500  | 3.05                | 0.01 %                       | 0.42 %                      | 0.00 %                     | 0.00 %                        | 99.57 %                      | 0.00 %                      |               |
| 7.000  | 3.05                | 0.00 %                       | 0.42 %                      | 0.00 %                     | 0.00 %                        | 99.57 %                      | 0.00 %                      |               |
| 7.400  | 3.05                | 0.00 %                       | 0.42 %                      | 0.01 %                     | 0.00 %                        | 99.56 %                      | 0.00 %                      |               |
| 8.000  | 3.01                | 0.00 %                       | 0.42 %                      | 0.05 %                     | 0.00 %                        | 99.53 %                      | 0.00 %                      |               |
| 9.000  | 2.73                | 0.00 %                       | 0.42 %                      | 0.48 %                     | 0.00 %                        | 99.09 %                      | 0.00 %                      |               |
| 10.000 | 1.96                | 0.00 %                       | 0.40 %                      | 4.64 %                     | 0.00 %                        | 94.93 %                      | 0.02 %                      |               |
| 11.000 | 1.00                | 0.00 %                       | 0.28 %                      | 32.70 %                    | 0.00 %                        | 66.85 %                      | 0.16 %                      |               |
| 12.000 | 0.01                | 0.00 %                       | 0.07 %                      | 82.63 %                    | 0.00 %                        | 16.89 %                      | 0.41 %                      |               |

## Carbonate and acidity

Carbonate 0.311 mM  
 Acidity error 2.550 mM

## Other graphs

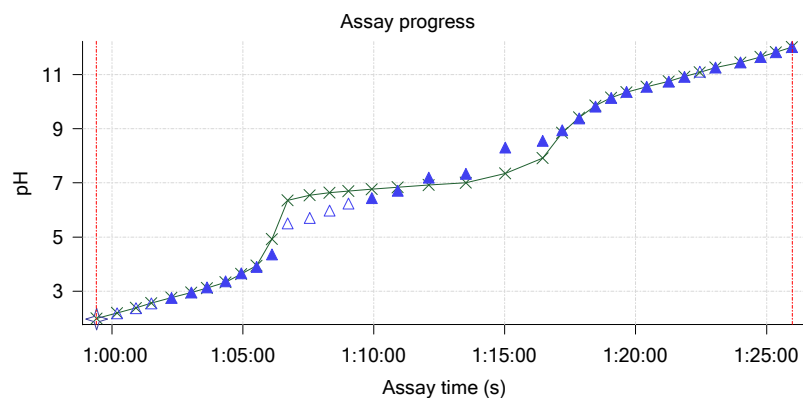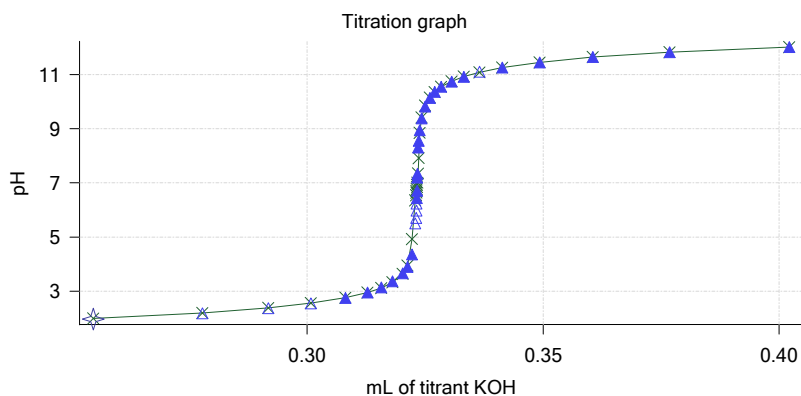

Sample name: **M16\_octanol**  
 Assay name: **pH-metric high logP**  
 Assay ID: **18C-01008**  
 Filename: **C:\Sirius\_T3\Mehtap\20180228\_exp28\_logP\_T3-2\18C-01008\_M16\_octanol\_pH-metric high logP.t3r**

Experiment start time: **3/1/2018 10:41:05 AM**  
 Analyst: **Pion**  
 Instrument ID: **T312060**

## Other graphs (continued)

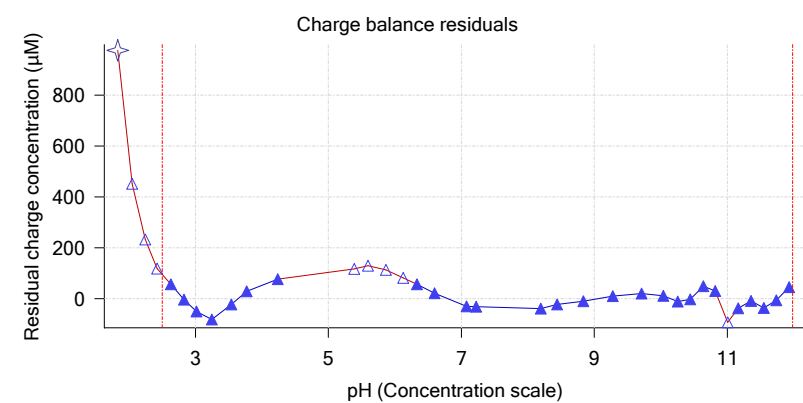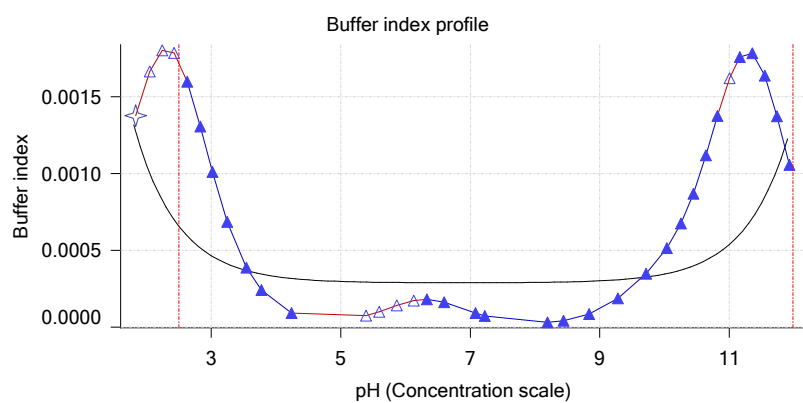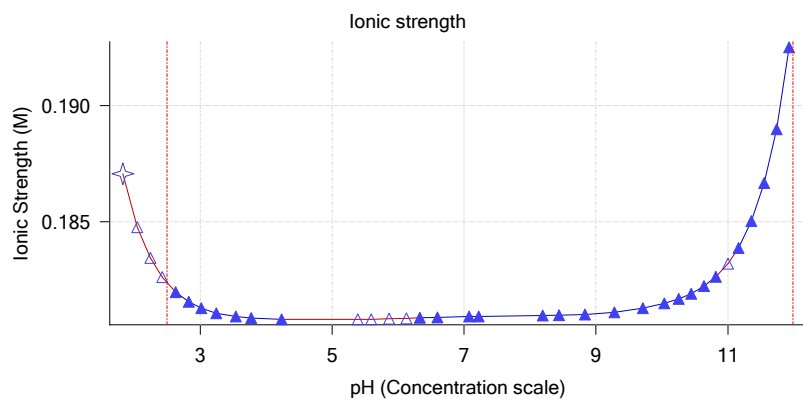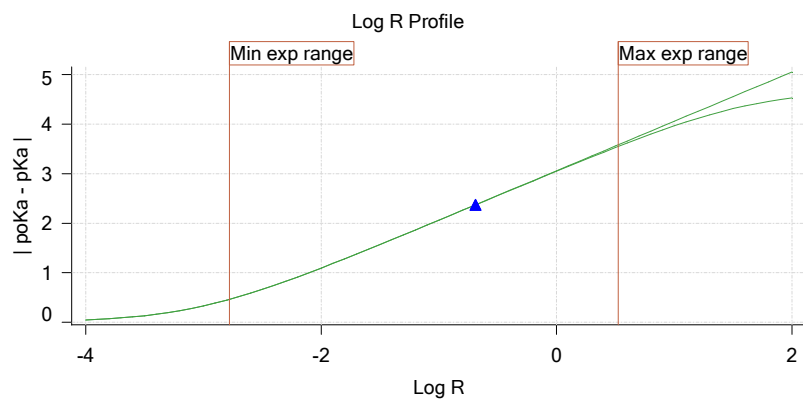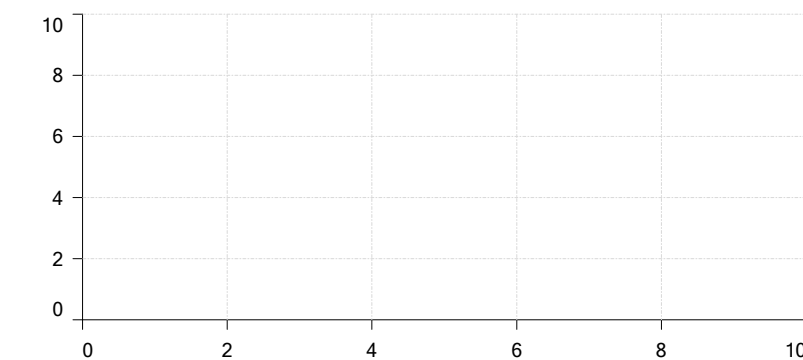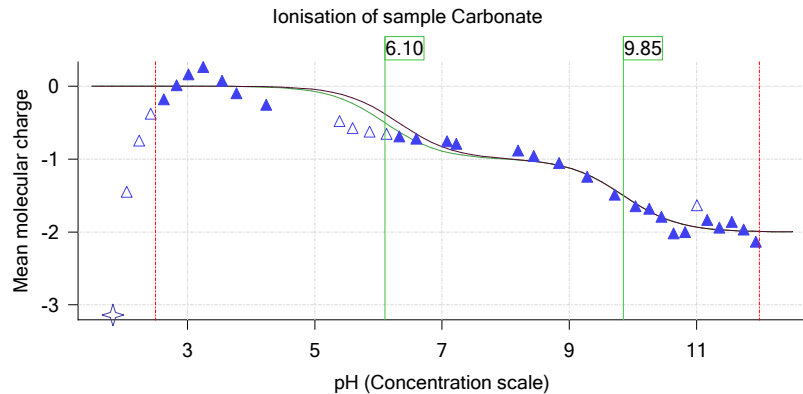

Sample name: **M16\_octanol**  
 Assay name: **pH-metric high logP**  
 Assay ID: **18C-01008**  
 Filename: **C:\Sirius\_T3\Mehtap\20180228\_exp28\_logP\_T3-2\18C-01008\_M16\_octanol\_pH-metric high logP.t3r**

Experiment start time: **3/1/2018 10:41:05 AM**  
 Analyst: **Pion**  
 Instrument ID: **T312060**

## Assay Model

| Settings                          | Value        | Date/Time changed    | Imported from      |
|-----------------------------------|--------------|----------------------|--------------------|
| Sample name                       | M16_octanol  | 2/27/2018 6:14:13 PM | User entered value |
| Sample by                         | Weight       |                      | Default value      |
| Sample weight                     | 0.001570 g   | 2/28/2018 4:25:47 PM | User entered value |
| Formula weight                    | 210.23 g/mol | 2/27/2018 5:08:55 PM | User entered value |
| Solubility                        | Unknown      |                      | Default value      |
| Molecular weight                  | 210.23       | 2/27/2018 5:08:55 PM | User entered value |
| Individual pKa ionic environments | No           |                      | Default value      |
| Number of pKas                    | 2            | 2/27/2018 5:08:55 PM | User entered value |
| Sample is a                       | Ampholyte    | 2/27/2018 5:08:55 PM | User entered value |
| pKa 1                             | 4.70         | 2/27/2018 5:08:55 PM | User entered value |
| Type                              | Base         | 2/27/2018 5:08:55 PM | User entered value |
| pKa 2                             | 8.94         | 2/27/2018 5:08:55 PM | User entered value |
| Type                              | Acid         | 2/27/2018 5:08:55 PM | User entered value |
| logp (XH2 +)                      | -0.97        | 2/27/2018 5:09:30 PM | User entered value |
| logP (neutral XH)                 | 1.47         | 2/27/2018 5:09:44 PM | User entered value |
| logP (X -)                        | -1.62        | 2/27/2018 5:09:50 PM | User entered value |

## Events

| Time    | Event             | Water      | Acid       | Base       | Octanol    | pH     | dpH/dt   | pH R-squared | pH SD   | dpH/dt time         |
|---------|-------------------|------------|------------|------------|------------|--------|----------|--------------|---------|---------------------|
| 9:20.9  | Initial pH = 3.61 |            |            |            |            |        |          |              |         |                     |
| 12:25.5 | Data point 1      | 1.50000 mL | 0.04518 mL | 0.00275 mL | 0.04000 mL | 2.007  | -0.00290 | 0.67446      | 0.00017 | 10.5 s              |
| 13:12.3 | Data point 2      | 1.50000 mL | 0.04518 mL | 0.01799 mL | 0.04000 mL | 2.212  | 0.00158  | 0.11489      | 0.00023 | 10.0 s              |
| 13:47.9 | Data point 3      | 1.50000 mL | 0.04518 mL | 0.02752 mL | 0.04000 mL | 2.403  | 0.00139  | 0.25998      | 0.00013 | 10.0 s              |
| 14:23.5 | Data point 4      | 1.50000 mL | 0.04518 mL | 0.03368 mL | 0.04000 mL | 2.577  | -0.00059 | 0.10502      | 0.00009 | 10.0 s              |
| 15:09.4 | Data point 5      | 1.50000 mL | 0.04518 mL | 0.03805 mL | 0.04000 mL | 2.771  | -0.00565 | 0.10551      | 0.00086 | 10.0 s              |
| 15:44.9 | Data point 6      | 1.50000 mL | 0.04518 mL | 0.04080 mL | 0.04000 mL | 2.914  | -0.00330 | 0.57968      | 0.00021 | 10.0 s              |
| 16:35.9 | Data point 7      | 1.50000 mL | 0.04518 mL | 0.04353 mL | 0.04000 mL | 3.106  | -0.00387 | 0.67760      | 0.00023 | 10.0 s              |
| 17:26.9 | Data point 8      | 1.50000 mL | 0.04518 mL | 0.04567 mL | 0.04000 mL | 3.301  | -0.00110 | 0.02661      | 0.00033 | 10.0 s              |
| 18:23.0 | Data point 9      | 1.50000 mL | 0.04518 mL | 0.04793 mL | 0.04000 mL | 3.489  | -0.01147 | 0.32477      | 0.00099 | 10.0 s              |
| 19:19.1 | Data point 10     | 1.50000 mL | 0.04518 mL | 0.05000 mL | 0.04000 mL | 3.679  | -0.00492 | 0.73539      | 0.00028 | 10.5 s              |
| 20:10.5 | Data point 11     | 1.50000 mL | 0.04518 mL | 0.05148 mL | 0.04000 mL | 3.876  | -0.01175 | 0.51526      | 0.00081 | 10.0 s              |
| 20:51.3 | Data point 12     | 1.50000 mL | 0.04518 mL | 0.05247 mL | 0.04000 mL | 4.059  | -0.01315 | 0.67954      | 0.00079 | 10.0 s              |
| 21:26.7 | Data point 13     | 1.50000 mL | 0.04518 mL | 0.05322 mL | 0.04000 mL | 4.276  | -0.00889 | 0.68480      | 0.00053 | 10.5 s              |
| 22:02.7 | Data point 14     | 1.50000 mL | 0.04518 mL | 0.05407 mL | 0.04000 mL | 4.672  | -0.01660 | 0.79604      | 0.00092 | 11.5 s              |
| 22:39.6 | Data point 15     | 1.50000 mL | 0.04518 mL | 0.05489 mL | 0.04000 mL | 7.954  | -0.05119 | 0.98315      | 0.00255 | Timed out at 59.5 s |
| 24:04.9 | Data point 16     | 1.50000 mL | 0.04518 mL | 0.05506 mL | 0.04000 mL | 8.206  | -0.02013 | 0.98810      | 0.00100 | 38.0 s              |
| 25:08.3 | Data point 17     | 1.50000 mL | 0.04518 mL | 0.05534 mL | 0.04000 mL | 8.859  | -0.01483 | 0.91186      | 0.00077 | 10.5 s              |
| 25:44.3 | Data point 18     | 1.50000 mL | 0.04518 mL | 0.05611 mL | 0.04000 mL | 9.410  | -0.01450 | 0.98052      | 0.00072 | 10.5 s              |
| 26:20.3 | Data point 19     | 1.50000 mL | 0.04518 mL | 0.05696 mL | 0.04000 mL | 9.691  | -0.01710 | 0.91406      | 0.00088 | 10.0 s              |
| 27:06.1 | Data point 20     | 1.50000 mL | 0.04518 mL | 0.05804 mL | 0.04000 mL | 9.876  | -0.01009 | 0.92731      | 0.00052 | 10.0 s              |
| 27:57.0 | Data point 21     | 1.50000 mL | 0.04518 mL | 0.05915 mL | 0.04000 mL | 10.060 | -0.00874 | 0.33867      | 0.00074 | 10.0 s              |
| 28:32.5 | Data point 22     | 1.50000 mL | 0.04518 mL | 0.06018 mL | 0.04000 mL | 10.223 | -0.01285 | 0.40934      | 0.00099 | 10.0 s              |
| 29:23.5 | Data point 23     | 1.50000 mL | 0.04518 mL | 0.06159 mL | 0.04000 mL | 10.406 | -0.00727 | 0.93231      | 0.00037 | 10.5 s              |
| 30:14.9 | Data point 24     | 1.50000 mL | 0.04518 mL | 0.06329 mL | 0.04000 mL | 10.593 | -0.00688 | 0.41094      | 0.00053 | 10.0 s              |
| 31:06.0 | Data point 25     | 1.50000 mL | 0.04518 mL | 0.06543 mL | 0.04000 mL | 10.776 | -0.01364 | 0.90456      | 0.00071 | 10.5 s              |
| 31:57.5 | Data point 26     | 1.50000 mL | 0.04518 mL | 0.06839 mL | 0.04000 mL | 10.961 | -0.01272 | 0.56692      | 0.00083 | 10.0 s              |
| 32:43.3 | Data point 27     | 1.50000 mL | 0.04518 mL | 0.07150 mL | 0.04000 mL | 11.147 | 0.00312  | 0.33680      | 0.00027 | 10.0 s              |
| 33:34.4 | Data point 28     | 1.50000 mL | 0.04518 mL | 0.07596 mL | 0.04000 mL | 11.337 | -0.00151 | 0.26906      | 0.00014 | 10.0 s              |
| 34:20.4 | Data point 29     | 1.50000 mL | 0.04518 mL | 0.08177 mL | 0.04000 mL | 11.533 | -0.00131 | 0.26464      | 0.00013 | 10.0 s              |
| 34:56.1 | Data point 30     | 1.50000 mL | 0.04518 mL | 0.09099 mL | 0.04000 mL | 11.712 | 0.01582  | 0.69550      | 0.00094 | 10.0 s              |
| 35:31.9 | Data point 31     | 1.50000 mL | 0.04518 mL | 0.10525 mL | 0.04000 mL | 11.903 | -0.01334 | 0.54570      | 0.00089 | 10.0 s              |
| 36:07.6 | Data point 32     | 1.50000 mL | 0.04518 mL | 0.11997 mL | 0.04000 mL | 12.036 | -0.00001 | 0.00000      | 0.00060 | 10.0 s              |
| 37:25.0 | Data point 33     | 1.50000 mL | 0.17239 mL | 0.11997 mL | 0.14000 mL | 1.962  | -0.01011 | 0.31324      | 0.00089 | 10.0 s              |
| 38:11.4 | Data point 34     | 1.50000 mL | 0.17239 mL | 0.13967 mL | 0.14000 mL | 2.167  | -0.01017 | 0.51336      | 0.00070 | 10.0 s              |
| 38:47.1 | Data point 35     | 1.50000 mL | 0.17239 mL | 0.15202 mL | 0.14000 mL | 2.364  | 0.01692  | 0.77326      | 0.00095 | 14.5 s              |

Sample name: **M16\_octanol** Experiment start time: **3/1/2018 10:41:05 AM**  
 Assay name: **pH-metric high logP** Analyst: **Pion**  
 Assay ID: **18C-01008** Instrument ID: **T312060**  
 Filename: **C:\Sirius\_T3\Mehtap\20180228\_exp28\_logP\_T3-2\18C-01008\_M16\_octanol\_pH-metric high logP.t3r**

## Events (continued)

| Time      | Event         | Water      | Acid       | Base       | Octanol    | pH     | dpH/dt   | pH R-squared | pH SD   | dpH/dt time         |
|-----------|---------------|------------|------------|------------|------------|--------|----------|--------------|---------|---------------------|
| 39:27.2   | Data point 36 | 1.50000 mL | 0.17239 mL | 0.15988 mL | 0.14000 mL | 2.550  | -0.00131 | 0.00551      | 0.00087 | 10.0 s              |
| 40:02.8   | Data point 37 | 1.50000 mL | 0.17239 mL | 0.16508 mL | 0.14000 mL | 2.719  | 0.01355  | 0.83353      | 0.00073 | 10.0 s              |
| 40:53.9   | Data point 38 | 1.50000 mL | 0.17239 mL | 0.16943 mL | 0.14000 mL | 2.923  | -0.00343 | 0.05295      | 0.00074 | 10.0 s              |
| 41:39.9   | Data point 39 | 1.50000 mL | 0.17239 mL | 0.17302 mL | 0.14000 mL | 3.116  | 0.00068  | 0.02704      | 0.00020 | 10.0 s              |
| 42:25.7   | Data point 40 | 1.50000 mL | 0.17239 mL | 0.17545 mL | 0.14000 mL | 3.313  | 0.01297  | 0.52106      | 0.00089 | 10.5 s              |
| 43:12.1   | Data point 41 | 1.50000 mL | 0.17239 mL | 0.17726 mL | 0.14000 mL | 3.511  | 0.00068  | 0.03379      | 0.00018 | 10.0 s              |
| 43:57.8   | Data point 42 | 1.50000 mL | 0.17239 mL | 0.17872 mL | 0.14000 mL | 3.704  | -0.00606 | 0.15775      | 0.00075 | 16.5 s              |
| 44:39.8   | Data point 43 | 1.50000 mL | 0.17239 mL | 0.18032 mL | 0.14000 mL | 4.100  | -0.00521 | 0.09608      | 0.00083 | 10.0 s              |
| 45:15.3   | Data point 44 | 1.50000 mL | 0.17239 mL | 0.18123 mL | 0.14000 mL | 4.503  | -0.00893 | 0.23890      | 0.00090 | 10.5 s              |
| 45:51.2   | Data point 45 | 1.50000 mL | 0.17239 mL | 0.18203 mL | 0.14000 mL | 6.710  | -0.05359 | 0.98654      | 0.00266 | Timed out at 59.5 s |
| 47:21.8   | Data point 46 | 1.50000 mL | 0.17239 mL | 0.18234 mL | 0.14000 mL | 8.402  | -0.02008 | 0.98880      | 0.00100 | 43.5 s              |
| 48:30.8   | Data point 47 | 1.50000 mL | 0.17239 mL | 0.18260 mL | 0.14000 mL | 8.986  | -0.01599 | 0.67601      | 0.00096 | 19.0 s              |
| 49:15.2   | Data point 48 | 1.50000 mL | 0.17239 mL | 0.18328 mL | 0.14000 mL | 9.587  | -0.01391 | 0.57721      | 0.00090 | 11.5 s              |
| 49:52.1   | Data point 49 | 1.50000 mL | 0.17239 mL | 0.18420 mL | 0.14000 mL | 9.950  | -0.01192 | 0.86726      | 0.00063 | 10.5 s              |
| 50:28.1   | Data point 50 | 1.50000 mL | 0.17239 mL | 0.18497 mL | 0.14000 mL | 10.154 | -0.00728 | 0.19670      | 0.00081 | 10.0 s              |
| 51:19.0   | Data point 51 | 1.50000 mL | 0.17239 mL | 0.18612 mL | 0.14000 mL | 10.353 | -0.01567 | 0.63815      | 0.00097 | 10.0 s              |
| 52:10.0   | Data point 52 | 1.50000 mL | 0.17239 mL | 0.18772 mL | 0.14000 mL | 10.539 | -0.00172 | 0.22733      | 0.00018 | 10.5 s              |
| 53:01.4   | Data point 53 | 1.50000 mL | 0.17239 mL | 0.19010 mL | 0.14000 mL | 10.724 | -0.00528 | 0.43270      | 0.00040 | 10.0 s              |
| 53:52.4   | Data point 54 | 1.50000 mL | 0.17239 mL | 0.19306 mL | 0.14000 mL | 10.912 | 0.00664  | 0.52199      | 0.00045 | 10.0 s              |
| 54:43.5   | Data point 55 | 1.50000 mL | 0.17239 mL | 0.19668 mL | 0.14000 mL | 11.108 | -0.00005 | 0.00018      | 0.00019 | 10.0 s              |
| 55:29.4   | Data point 56 | 1.50000 mL | 0.17239 mL | 0.20186 mL | 0.14000 mL | 11.294 | 0.00132  | 0.14476      | 0.00017 | 10.0 s              |
| 56:15.3   | Data point 57 | 1.50000 mL | 0.17239 mL | 0.20851 mL | 0.14000 mL | 11.482 | -0.00055 | 0.02091      | 0.00019 | 10.0 s              |
| 56:51.0   | Data point 58 | 1.50000 mL | 0.17239 mL | 0.21809 mL | 0.14000 mL | 11.660 | 0.01284  | 0.83806      | 0.00069 | 10.0 s              |
| 57:26.7   | Data point 59 | 1.50000 mL | 0.17239 mL | 0.23274 mL | 0.14000 mL | 11.852 | 0.00826  | 0.93309      | 0.00042 | 10.0 s              |
| 58:02.7   | Data point 60 | 1.50000 mL | 0.17239 mL | 0.25475 mL | 0.14000 mL | 12.031 | 0.00778  | 0.92215      | 0.00040 | 10.0 s              |
| 59:24.9   | Data point 61 | 1.50000 mL | 0.31343 mL | 0.25475 mL | 0.44000 mL | 1.965  | -0.00463 | 0.40371      | 0.00036 | 10.0 s              |
| 1:00:11.3 | Data point 62 | 1.50000 mL | 0.31343 mL | 0.27785 mL | 0.44000 mL | 2.178  | 0.01276  | 0.89016      | 0.00067 | 17.5 s              |
| 1:00:54.6 | Data point 63 | 1.50000 mL | 0.31343 mL | 0.29184 mL | 0.44000 mL | 2.370  | 0.01126  | 0.59387      | 0.00072 | 10.0 s              |
| 1:01:30.1 | Data point 64 | 1.50000 mL | 0.31343 mL | 0.30085 mL | 0.44000 mL | 2.548  | 0.01630  | 0.71883      | 0.00095 | 10.0 s              |
| 1:02:16.1 | Data point 65 | 1.50000 mL | 0.31343 mL | 0.30814 mL | 0.44000 mL | 2.753  | -0.00161 | 0.01660      | 0.00062 | 10.0 s              |
| 1:03:02.1 | Data point 66 | 1.50000 mL | 0.31343 mL | 0.31279 mL | 0.44000 mL | 2.951  | 0.01037  | 0.37883      | 0.00083 | 10.0 s              |
| 1:03:37.6 | Data point 67 | 1.50000 mL | 0.31343 mL | 0.31573 mL | 0.44000 mL | 3.137  | 0.00768  | 0.16641      | 0.00093 | 17.5 s              |
| 1:04:20.5 | Data point 68 | 1.50000 mL | 0.31343 mL | 0.31813 mL | 0.44000 mL | 3.367  | 0.00085  | 0.00280      | 0.00079 | 10.0 s              |
| 1:04:56.0 | Data point 69 | 1.50000 mL | 0.31343 mL | 0.32025 mL | 0.44000 mL | 3.661  | 0.00260  | 0.02567      | 0.00080 | 10.0 s              |
| 1:05:31.4 | Data point 70 | 1.50000 mL | 0.31343 mL | 0.32128 mL | 0.44000 mL | 3.891  | -0.00269 | 0.34212      | 0.00023 | 10.0 s              |
| 1:06:06.9 | Data point 71 | 1.50000 mL | 0.31343 mL | 0.32227 mL | 0.44000 mL | 4.353  | -0.00164 | 0.02000      | 0.00057 | 10.0 s              |
| 1:06:42.3 | Data point 72 | 1.50000 mL | 0.31343 mL | 0.32295 mL | 0.44000 mL | 5.501  | -0.01091 | 0.30965      | 0.00097 | 20.5 s              |
| 1:07:33.3 | Data point 73 | 1.50000 mL | 0.31343 mL | 0.32310 mL | 0.44000 mL | 5.706  | 0.01056  | 0.34237      | 0.00089 | 19.5 s              |
| 1:08:18.3 | Data point 74 | 1.50000 mL | 0.31343 mL | 0.32317 mL | 0.44000 mL | 5.975  | -0.01091 | 0.35546      | 0.00090 | 18.0 s              |
| 1:09:01.7 | Data point 75 | 1.50000 mL | 0.31343 mL | 0.32321 mL | 0.44000 mL | 6.238  | -0.01377 | 0.50757      | 0.00095 | 28.0 s              |
| 1:09:55.2 | Data point 76 | 1.50000 mL | 0.31343 mL | 0.32326 mL | 0.44000 mL | 6.441  | -0.01475 | 0.53518      | 0.00100 | 34.0 s              |
| 1:10:54.6 | Data point 77 | 1.50000 mL | 0.31343 mL | 0.32331 mL | 0.44000 mL | 6.706  | -0.01933 | 0.97748      | 0.00097 | 40.5 s              |
| 1:12:05.6 | Data point 78 | 1.50000 mL | 0.31343 mL | 0.32335 mL | 0.44000 mL | 7.187  | -0.05389 | 0.98362      | 0.00268 | Timed out at 59.5 s |
| 1:13:31.0 | Data point 79 | 1.50000 mL | 0.31343 mL | 0.32340 mL | 0.44000 mL | 7.330  | -0.03553 | 0.97995      | 0.00177 | Timed out at 59.5 s |
| 1:15:01.5 | Data point 80 | 1.50000 mL | 0.31343 mL | 0.32354 mL | 0.44000 mL | 8.298  | -0.03259 | 0.96414      | 0.00164 | Timed out at 59.5 s |
| 1:16:26.9 | Data point 81 | 1.50000 mL | 0.31343 mL | 0.32366 mL | 0.44000 mL | 8.546  | -0.01671 | 0.68295      | 0.00100 | 19.0 s              |
| 1:17:11.3 | Data point 82 | 1.50000 mL | 0.31343 mL | 0.32385 mL | 0.44000 mL | 8.939  | -0.01490 | 0.60712      | 0.00094 | 14.0 s              |
| 1:17:50.8 | Data point 83 | 1.50000 mL | 0.31343 mL | 0.32427 mL | 0.44000 mL | 9.381  | 0.00173  | 0.00806      | 0.00095 | 12.0 s              |
| 1:18:28.1 | Data point 84 | 1.50000 mL | 0.31343 mL | 0.32505 mL | 0.44000 mL | 9.814  | 0.00015  | 0.00006      | 0.00099 | 10.5 s              |
| 1:19:03.9 | Data point 85 | 1.50000 mL | 0.31343 mL | 0.32604 mL | 0.44000 mL | 10.137 | 0.00630  | 0.10167      | 0.00098 | 10.0 s              |
| 1:19:39.4 | Data point 86 | 1.50000 mL | 0.31343 mL | 0.32702 mL | 0.44000 mL | 10.354 | 0.00292  | 0.02377      | 0.00094 | 10.0 s              |
| 1:20:25.1 | Data point 87 | 1.50000 mL | 0.31343 mL | 0.32843 mL | 0.44000 mL | 10.543 | 0.00828  | 0.57942      | 0.00054 | 10.0 s              |
| 1:21:16.2 | Data point 88 | 1.50000 mL | 0.31343 mL | 0.33067 mL | 0.44000 mL | 10.736 | 0.01106  | 0.70690      | 0.00065 | 10.0 s              |

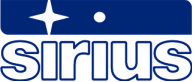

## Assay Events

Sample name: **M16\_octanol** Experiment start time: **3/1/2018 10:41:05 AM**  
Assay name: **pH-metric high logP** Analyst: **Pion**  
Assay ID: **18C-01008** Instrument ID: **T312060**  
Filename: **C:\Sirius\_T3\Mehtap\20180228\_exp28\_logP\_T3-2\18C-01008\_M16\_octanol\_pH-metric high logP.t3r**

**Events (continued)**

| Time      | Event         | Water      | Acid       | Base       | Octanol    | pH     | dpH/dt  | pH R-squared | pH SD   | dpH/dt time |
|-----------|---------------|------------|------------|------------|------------|--------|---------|--------------|---------|-------------|
| 1:21:51.7 | Data point 89 | 1.50000 mL | 0.31343 mL | 0.33321 mL | 0.44000 mL | 10.914 | 0.00908 | 0.75807      | 0.00051 | 10.0 s      |
| 1:22:27.2 | Data point 90 | 1.50000 mL | 0.31343 mL | 0.33655 mL | 0.44000 mL | 11.100 | 0.00124 | 0.00385      | 0.00099 | 10.0 s      |
| 1:23:02.7 | Data point 91 | 1.50000 mL | 0.31343 mL | 0.34132 mL | 0.44000 mL | 11.258 | 0.01768 | 0.78273      | 0.00099 | 16.0 s      |
| 1:23:60.0 | Data point 92 | 1.50000 mL | 0.31343 mL | 0.34927 mL | 0.44000 mL | 11.450 | 0.01237 | 0.90868      | 0.00064 | 10.0 s      |
| 1:24:46.2 | Data point 93 | 1.50000 mL | 0.31343 mL | 0.36051 mL | 0.44000 mL | 11.643 | 0.01058 | 0.60009      | 0.00067 | 10.0 s      |
| 1:25:21.9 | Data point 94 | 1.50000 mL | 0.31343 mL | 0.37681 mL | 0.44000 mL | 11.828 | 0.01552 | 0.68214      | 0.00093 | 10.0 s      |
| 1:25:58.0 | Data point 95 | 1.50000 mL | 0.31343 mL | 0.40214 mL | 0.44000 mL | 12.016 | 0.00685 | 0.34934      | 0.00057 | 10.0 s      |
| 1:26:17.0 | Assay volumes | 1.50000 mL | 0.31343 mL | 0.40214 mL | 0.44000 mL |        |         |              |         |             |



Sample name: **M16\_octanol**  
 Assay name: **pH-metric high logP**  
 Assay ID: **18C-01008**  
 Filename: **C:\Sirius\_T3\Mehtap\20180228\_exp28\_logP\_T3-2\18C-01008\_M16\_octanol\_pH-metric high logP.t3r**

Experiment start time: **3/1/2018 10:41:05 AM**  
 Analyst: **Pion**  
 Instrument ID: **T312060**

## Assay Settings

| Setting                             | Value              | Original Value | Date/Time changed | Imported from |
|-------------------------------------|--------------------|----------------|-------------------|---------------|
| <b>General Settings</b>             |                    |                |                   |               |
| Analyst name                        | Pion               |                |                   |               |
| <b>Standard Experiment Settings</b> |                    |                |                   |               |
| Number of titrations                | 3                  |                |                   |               |
| Minimum pH                          | 2.000              |                |                   |               |
| Maximum pH                          | 12.000             |                |                   |               |
| pH step between points of           | 0.200              |                |                   |               |
| Minimum titrant addition            | 0.00002 mL         |                |                   |               |
| Maximum titrant addition            | 0.10000 mL         |                |                   |               |
| Argon flow rate                     | 100%               |                |                   |               |
| Start titration using               | Cautious pH adjust |                |                   |               |
| <b>Advanced General Settings</b>    |                    |                |                   |               |
| Detect turbidity using              | None               |                |                   |               |
| Collect turbidity sensor data       | No                 |                |                   |               |
| Collect UV spectra                  | No                 |                |                   |               |
| Stir after titrant addition for     | 5 seconds          |                |                   |               |
| For titrant addition, stir at       | 10%                |                |                   |               |
| <b>Titration Pre-Dose</b>           |                    |                |                   |               |
| Titration pre-dose                  | None               |                |                   |               |
| <b>Assay Medium</b>                 |                    |                |                   |               |
| ISA water volume                    | 1.50 mL            |                |                   |               |
| Water added                         | Automatic          |                |                   |               |
| Partition solvent type              | Octanol            |                |                   |               |
| Partition volume                    | 0.040 mL           |                |                   |               |
| Partition solvent added             | Automatic          |                |                   |               |
| After partition addition, stir for  | 1 seconds          |                |                   |               |
| <b>Sample Sonication</b>            |                    |                |                   |               |
| Sonicate                            | Yes                |                |                   |               |
| Adjust pH for sonication            | No                 |                |                   |               |
| Sonicate for                        | 300 seconds        |                |                   |               |
| After sonication stir for           | 5 seconds          |                |                   |               |
| <b>Sample Dissolution</b>           |                    |                |                   |               |
| Perform a dissolution stage         | Yes                |                |                   |               |
| Adjust and hold pH for dissolution  | To start pH        |                |                   |               |
| Stir to dissolve for                | 120 seconds        |                |                   |               |
| For dissolution, stir at            | 10%                |                |                   |               |
| <b>Carbonate purge</b>              |                    |                |                   |               |
| Perform a carbonate purge           | No                 |                |                   |               |
| <b>Temperature Control</b>          |                    |                |                   |               |
| Wait for temperature                | Yes                |                |                   |               |
| Required start temperature          | 25.0°C             |                |                   |               |
| Acceptable deviation                | 0.5°C              |                |                   |               |
| Time to wait                        | 60 seconds         |                |                   |               |
| Stir speed of                       | 50%                |                |                   |               |
| <b>Titration 1</b>                  |                    |                |                   |               |
| Titrate from                        | Low to high pH     |                |                   |               |
| Adjust to start pH                  | Yes                |                |                   |               |
| After pH adjust stir for            | 30 seconds         |                |                   |               |
| Stir to allow partitioning for      | 15 seconds         |                |                   |               |
| Stirrer speed for partitioning      | 50%                |                |                   |               |
| <b>Titration 2</b>                  |                    |                |                   |               |
| Titrate from                        | Low to high pH     |                |                   |               |
| Add additional water                | 0.00 mL            |                |                   |               |
| Additional partition solvent volume | 0.100 mL           |                |                   |               |
| Additional partition solvent added  | Automatic          |                |                   |               |
| After pH adjust stir for            | 30 seconds         |                |                   |               |
| Stir to allow partitioning for      | 15 seconds         |                |                   |               |
| Stirrer speed for partitioning      | 55%                |                |                   |               |



Sample name: **M16\_octanol**  
 Assay name: **pH-metric high logP**  
 Assay ID: **18C-01008**  
 Filename: **C:\Sirius\_T3\Mehtap\20180228\_exp28\_logP\_T3-2\18C-01008\_M16\_octanol\_pH-metric high logP.t3r**

Experiment start time: **3/1/2018 10:41:05 AM**  
 Analyst: **Pion**  
 Instrument ID: **T312060**

## Assay Settings (continued)

| Setting                             | Value          | Original Value | Date/Time changed | Imported from |
|-------------------------------------|----------------|----------------|-------------------|---------------|
| <b>Titration 3</b>                  |                |                |                   |               |
| Titrate from                        | Low to high pH |                |                   |               |
| Add additional water                | 0.00 mL        |                |                   |               |
| Additional partition solvent volume | 0.300 mL       |                |                   |               |
| Additional partition solvent added  | Automatic      |                |                   |               |
| After pH adjust stir for            | 30 seconds     |                |                   |               |
| Stir to allow partitioning for      | 15 seconds     |                |                   |               |
| Stirrer speed for partitioning      | 60%            |                |                   |               |
| <b>Data Point Stability</b>         |                |                |                   |               |
| Stir during data point collection   | No             |                |                   |               |
| Delay before data point collection  | 0 seconds      |                |                   |               |
| Number of points to average         | 20 points      |                |                   |               |
| Time interval between points        | 0.50 seconds   |                |                   |               |
| Required maximum standard deviation | 0.00100 dpH/dt |                |                   |               |
| Stability timeout after             | 60 seconds     |                |                   |               |

## Calibration Settings

| Setting                   | Value  | Date/Time changed    | Imported from             |
|---------------------------|--------|----------------------|---------------------------|
| Four-Plus alpha           | 0.130  | 3/1/2018 10:41:04 AM | C:\Sirius_T3\HCl18B27.t3r |
| Four-Plus S               | 0.9970 | 3/1/2018 10:41:04 AM | C:\Sirius_T3\HCl18B27.t3r |
| Four-Plus jH              | 0.8    | 3/1/2018 10:41:04 AM | C:\Sirius_T3\HCl18B27.t3r |
| Four-Plus jOH             | -0.4   | 3/1/2018 10:41:04 AM | C:\Sirius_T3\HCl18B27.t3r |
| Base concentration factor | 1.000  | 3/1/2018 10:41:05 AM | C:\Sirius_T3\KOH18B27.t3r |
| Acid concentration factor | 0.994  | 3/1/2018 10:41:05 AM | C:\Sirius_T3\HCl18B27.t3r |

## Instrument Settings

| Setting              | Value                      | Batch Id    | Install date           |
|----------------------|----------------------------|-------------|------------------------|
| Instrument owner     | Merck                      |             |                        |
| Instrument ID        | T312060                    |             |                        |
| Instrument type      | T3 Simulator               |             |                        |
| Software version     | 1.1.3.0                    |             |                        |
| Dispenser module     |                            | T3DM1200361 | 3/31/2009 5:24:52 AM   |
| Dispenser 0          | Water                      |             | 3/31/2009 5:25:05 AM   |
| Syringe volume       | 2.5 mL                     |             |                        |
| Firmware version     | 1.2.1(r2)                  |             |                        |
| Titrant              | Water (0.15 M KCl)         | 02-06-2018  | 2/27/2018 10:05:59 AM  |
| Dispenser 2          | Acid                       |             | 3/31/2009 5:25:11 AM   |
| Syringe volume       | 0.5 mL                     |             |                        |
| Firmware version     | 1.2.1(r2)                  |             |                        |
| Titrant              | Acid (0.5 M HCl)           | 02-27-2018  | 2/27/2018 10:27:22 AM  |
| Dispenser 1          | Base                       |             | 3/31/2009 5:25:21 AM   |
| Syringe volume       | 0.5 mL                     |             |                        |
| Firmware version     | 1.2.1(r2)                  |             |                        |
| Titrant              | Base (0.5 M KOH)           | 9/22/2017   | 2/27/2018 10:21:22 AM  |
| Dispenser 5          | Cosolvent                  |             | 3/31/2009 5:26:24 AM   |
| Syringe volume       | 2.5 mL                     |             |                        |
| Firmware version     | 1.2.1(r2)                  |             |                        |
| Distribution valve 5 | Distribution Valve         |             | 3/31/2009 5:28:19 AM   |
| Firmware version     | 1.1.3                      |             |                        |
| Port A               | Methanol (80%, 0.15 M KCl) | 09-26-17    | 2/7/2018 9:42:01 AM    |
| Port B               | Cyclohexane                | 11-01-17    | 2/27/2018 10:37:57 AM  |
| Dispenser 3          | Buffer                     |             | 8/3/2010 5:05:16 AM    |
| Syringe volume       | 0.5 mL                     |             |                        |
| Firmware version     | 1.2.1(r2)                  |             |                        |
| Titrant              | Dodecane                   | 2018/01/31  | 2/28/2018 10:18:04 AM  |
| Dispenser 6          | Octanol                    |             | 10/22/2010 10:52:43 AM |

Sample name: **M16\_octanol**  
 Assay name: **pH-metric high logP**  
 Assay ID: **18C-01008**  
 Filename: **C:\Sirius\_T3\Mehtap\20180228\_exp28\_logP\_T3-2\18C-01008\_M16\_octanol\_pH-metric high logP.t3r**

Experiment start time: **3/1/2018 10:41:05 AM**  
 Analyst: **Pion**  
 Instrument ID: **T312060**

## Instrument Settings (continued)

| Setting                                   | Value                      | Batch Id    | Install date           |
|-------------------------------------------|----------------------------|-------------|------------------------|
| Syringe volume                            | 0.5 mL                     |             |                        |
| Firmware version                          | 1.2.1(r2)                  |             |                        |
| Titration                                 | Octanol                    | 01-31-2018  | 2/27/2018 9:59:35 AM   |
| Titration                                 |                            | T3TM1200161 | 3/31/2009 5:24:17 AM   |
| Horizontal axis firmware version          | 1.17 AI1DI2DO2 Stepper 2   |             |                        |
| Vertical axis firmware version            | 1.17 AI1DI2DO2 Stepper 2   |             |                        |
| Chassis I/O firmware version              | 1.11 AI1DI0DO4 Norgren I/O |             |                        |
| Probe I/O firmware version                | 1.1.1                      |             |                        |
| Electrode                                 | T3 Electrode               | T3E0923     | 1/23/2018 2:01:00 PM   |
| E0 calibration                            | +4.68 mV                   |             | 3/1/2018 10:41:53 AM   |
| Filling solution                          | 3M KCl                     | KCL097      | 2/27/2018 9:49:43 AM   |
| Liquids                                   |                            |             |                        |
| Wash 1                                    | 50% IPA:50% Water          |             | 2/28/2018 10:23:32 AM  |
| Wash 2                                    | 0.5% Triton X-100 in H2O   |             | 2/28/2018 10:23:34 AM  |
| Buffer position 1                         | pH7 Wash                   |             | 2/28/2018 10:24:06 AM  |
| Buffer position 2                         | pH 7                       |             | 2/28/2018 10:24:08 AM  |
| Storage position                          |                            |             | 2/28/2018 10:21:14 AM  |
| Wash water                                | 8.2e+003 mL                | 02-27-2018  | 2/27/2018 9:54:39 AM   |
| Waste                                     | 7.2e+003 mL                |             | 11/28/2017 10:36:29 AM |
| Temperature controller                    |                            |             | 8/5/2010 6:35:13 AM    |
| Turbidity detector                        |                            |             | 3/31/2009 5:24:45 AM   |
| Spectrometer                              |                            | 074811      | 11/23/2010 11:22:28 AM |
| Dip probe                                 |                            | 10196       |                        |
| Wavelength coefficient A0                 | 183.333                    |             |                        |
| Wavelength coefficient A1                 | 2.21568                    |             |                        |
| Wavelength coefficient A2                 | -0.000289308               |             |                        |
| Total lamp lit time                       | 112:08:55                  |             | 11/23/2010 11:22:28 AM |
| Calibrated on                             | 2/27/2018 10:40:38 AM      |             |                        |
| Integration time                          | 40                         |             |                        |
| Scans averaged                            | 10                         |             |                        |
| Autoloader                                |                            | T3AL1200345 | 11/10/2015 9:34:13 AM  |
| Left-right axis firmware version          | 1.17 AI1DI2DO2 Stepper 2   |             |                        |
| Front-back axis firmware version          | 1.17 AI1DI2DO2 Stepper 2   |             |                        |
| Vertical axis firmware version            | 1.17 AI1DI2DO2 Stepper 2   |             |                        |
| Chassis I/O firmware version              | 1.11 AI1DI0DO4 Norgren I/O |             |                        |
| Configuration                             |                            |             |                        |
| Alternate titration position              | Titration position         |             |                        |
| Alternate reference position              | Reference position         |             |                        |
| Maximum standard vial volume              | 3.50 mL                    |             |                        |
| Maximum alternate vial volume             | 25.00 mL                   |             |                        |
| Automatic action idle period              | 5 minute(s)                |             |                        |
| Titration tube volume                     | 1.3 mL                     |             |                        |
| Syringe flush count                       | 3.50                       |             |                        |
| Flowing wash pump volume                  | 20.0 mL                    |             |                        |
| Flowing wash stir duration                | 5 s                        |             |                        |
| Flowing wash stir speed                   | 30%                        |             |                        |
| Solvent wash stir duration                | 5 s                        |             |                        |
| Solvent wash stir speed                   | 30%                        |             |                        |
| Surfactant wash stir duration             | 5 s                        |             |                        |
| Surfactant wash stir speed                | 30%                        |             |                        |
| E0 calibration minimum number of points   | 10                         |             |                        |
| E0 calibration maximum standard deviation | 0.01500                    |             |                        |
| E0 calibration timeout period             | 60 s                       |             |                        |
| E0 calibration stir duration              | 5 s                        |             |                        |
| E0 calibration preparation stir speed     | 30%                        |             |                        |
| E0 calibration buffer wash stir duration  | 5 s                        |             |                        |
| E0 calibration buffer wash stir speed     | 30%                        |             |                        |
| E0 calibration reading stir speed         | 0%                         |             |                        |

Sample name: **M16\_octanol** Experiment start time: **3/1/2018 10:41:05 AM**  
 Assay name: **pH-metric high logP** Analyst: **Pion**  
 Assay ID: **18C-01008** Instrument ID: **T312060**  
 Filename: **C:\Sirius\_T3\Mehtap\20180228\_exp28\_logP\_T3-2\18C-01008\_M16\_octanol\_pH-metric high logP.t3r**

## Instrument Settings (continued)

| Setting                                     | Value   | Batch Id | Install date |
|---------------------------------------------|---------|----------|--------------|
| Spectrometer calibration stir duration      | 5 s     |          |              |
| Spectrometer calibration stir speed         | 30%     |          |              |
| Spectrometer calibration wash pump volume   | 20.0 mL |          |              |
| Spectrometer calibration wash stir duration | 5 s     |          |              |
| Spectrometer calibration wash stir speed    | 30%     |          |              |
| Overhead dispense height                    | 10000   |          |              |

## Refinement Settings

| Setting                        | Value    | Default value |
|--------------------------------|----------|---------------|
| Turbidity detection method     | None     | None          |
| Turbidity wavelength to assess | 500.0 nm | 500.0 nm      |
| Turbidity maximum absorbance   | 0.100    | 0.100         |
| Turbidity probe threshold      | 50.00    | 50.00         |

## Experiment Log

[2:58] Air gap created for Water (0.15 M KCl)  
 [2:58] Air gap created for Acid (0.5 M HCl)  
 [2:58] Air gap created for Base (0.5 M KOH)  
 [2:59] Air gap released for Water (0.15 M KCl)  
 [3:03] Titrator arm moved over Titration position  
 [3:03] Titration 1 of 3  
 [3:03] Adding initial titrants  
 [3:03] Automatically add 1.50000 mL of water  
 [3:28] Dispensed 1.500000 mL of Water (0.15 M KCl)  
 [3:32] Titrator arm moved over Drain  
 [9:13] Titrator arm moved to Titration position  
 [9:13] Argon flow rate set to 100  
 [9:13] Stirrer speed set to 10  
 [9:18] Automatically add 0.04000 mL of Octanol  
 [9:19] Dispensed 0.040005 mL of Octanol  
 [9:21] Initial pH = 3.61  
 [9:21] Iterative adjust 3.61 -> 2.00  
 [9:21] pH 3.61 -> 2.00  
 [9:22] Air gap released for Acid (0.5 M HCl)  
 [9:23] Dispensed 0.041627 mL of Acid (0.5 M HCl)  
 [9:28] pH 2.04 -> 2.00  
 [9:28] Dispensed 0.003551 mL of Acid (0.5 M HCl)  
 [9:33] Holding pH 2.00  
 [11:33] Stirrer speed set to 0  
 [11:33] Stirrer speed set to 50  
 [11:33] Iterative adjust 1.97 -> 2.00  
 [11:33] pH 1.97 -> 2.00  
 [11:34] Air gap released for Base (0.5 M KOH)  
 [11:35] Dispensed 0.002752 mL of Base (0.5 M KOH)  
 [12:25] Stirrer speed set to 0  
 [12:36] Datapoint id 1 collected  
 [12:36] Stirrer speed set to 50  
 [12:41] pH 2.02 -> 2.22  
 [12:41] Using cautious pH adjust  
 [12:41] Dispensed 0.007667 mL of Base (0.5 M KOH)  
 [12:46] Stepping pH = 2.10  
 [12:46] Dispensed 0.005974 mL of Base (0.5 M KOH)  
 [12:52] Stepping pH = 2.19  
 [12:52] Dispensed 0.001599 mL of Base (0.5 M KOH)  
 [12:57] Stepping pH = 2.22  
 [13:12] Stirrer speed set to 0  
 [13:22] Datapoint id 2 collected

Sample name: **M16\_octanol**  
Assay name: **pH-metric high logP**  
Assay ID: **18C-01008**  
Filename: **C:\Sirius\_T3\Mehtap\20180228\_exp28\_logP\_T3-2\18C-01008\_M16\_octanol\_pH-metric high logP.t3r**

Experiment start time: **3/1/2018 10:41:05 AM**  
Analyst: **Pion**  
Instrument ID: **T312060**

## Experiment Log (continued)

[13:22] Charge balance equation is out by 0.5%  
[13:22] Stirrer speed set to 50  
[13:27] pH 2.22 -> 2.42  
[13:27] Using charge balance adjust  
[13:27] Dispensed 0.009525 mL of Base (0.5 M KOH)  
[13:48] Stirrer speed set to 0  
[13:58] Datapoint id 3 collected  
[13:58] Charge balance equation is out by -8.2%  
[13:58] Stirrer speed set to 50  
[14:03] pH 2.41 -> 2.61  
[14:03] Using charge balance adjust  
[14:03] Dispensed 0.006162 mL of Base (0.5 M KOH)  
[14:23] Stirrer speed set to 0  
[14:33] Datapoint id 4 collected  
[14:33] Charge balance equation is out by -16.7%  
[14:33] Stirrer speed set to 50  
[14:38] pH 2.58 -> 2.78  
[14:38] Using cautious pH adjust  
[14:38] Dispensed 0.002093 mL of Base (0.5 M KOH)  
[14:43] Stepping pH = 2.67  
[14:44] Dispensed 0.001623 mL of Base (0.5 M KOH)  
[14:49] Stepping pH = 2.74  
[14:49] Dispensed 0.000659 mL of Base (0.5 M KOH)  
[14:54] Stepping pH = 2.78  
[15:09] Stirrer speed set to 0  
[15:19] Datapoint id 5 collected  
[15:19] Charge balance equation is out by -4.9%  
[15:19] Stirrer speed set to 50  
[15:24] pH 2.78 -> 2.98  
[15:24] Using charge balance adjust  
[15:24] Dispensed 0.002752 mL of Base (0.5 M KOH)  
[15:45] Stirrer speed set to 0  
[15:55] Datapoint id 6 collected  
[15:55] Charge balance equation is out by -31.1%  
[15:55] Stirrer speed set to 50  
[16:00] pH 2.92 -> 3.12  
[16:00] Using cautious pH adjust  
[16:00] Dispensed 0.001035 mL of Base (0.5 M KOH)  
[16:05] Stepping pH = 2.99  
[16:05] Dispensed 0.001129 mL of Base (0.5 M KOH)  
[16:10] Stepping pH = 3.07  
[16:10] Dispensed 0.000447 mL of Base (0.5 M KOH)  
[16:15] Stepping pH = 3.11  
[16:15] Dispensed 0.000118 mL of Base (0.5 M KOH)  
[16:20] Stepping pH = 3.12  
[16:36] Stirrer speed set to 0  
[16:46] Datapoint id 7 collected  
[16:46] Charge balance equation is out by -32.9%  
[16:46] Stirrer speed set to 50  
[16:51] pH 3.11 -> 3.31  
[16:51] Using cautious pH adjust  
[16:51] Dispensed 0.000729 mL of Base (0.5 M KOH)  
[16:56] Stepping pH = 3.18  
[16:56] Dispensed 0.000776 mL of Base (0.5 M KOH)  
[17:01] Stepping pH = 3.25  
[17:01] Dispensed 0.000494 mL of Base (0.5 M KOH)  
[17:06] Stepping pH = 3.30  
[17:06] Dispensed 0.000141 mL of Base (0.5 M KOH)  
[17:11] Stepping pH = 3.31

Sample name: **M16\_octanol**  
Assay name: **pH-metric high logP**  
Assay ID: **18C-01008**  
Filename: **C:\Sirius\_T3\Mehtap\20180228\_exp28\_logP\_T3-2\18C-01008\_M16\_octanol\_pH-metric high logP.t3r**

Experiment start time: **3/1/2018 10:41:05 AM**  
Analyst: **Pion**  
Instrument ID: **T312060**

## Experiment Log (continued)

[17:26] Stirrer speed set to 0  
[17:37] Datapoint id 8 collected  
[17:37] Charge balance equation is out by -46.4%  
[17:37] Stirrer speed set to 50  
[17:42] pH 3.30 -> 3.50  
[17:42] Using cautious pH adjust  
[17:42] Dispensed 0.000588 mL of Base (0.5 M KOH)  
[17:47] Stepping pH = 3.36  
[17:47] Dispensed 0.000800 mL of Base (0.5 M KOH)  
[17:52] Stepping pH = 3.43  
[17:52] Dispensed 0.000541 mL of Base (0.5 M KOH)  
[17:57] Stepping pH = 3.48  
[17:57] Dispensed 0.000188 mL of Base (0.5 M KOH)  
[18:02] Stepping pH = 3.49  
[18:02] Dispensed 0.000141 mL of Base (0.5 M KOH)  
[18:08] Stepping pH = 3.50  
[18:23] Stirrer speed set to 0  
[18:33] Datapoint id 9 collected  
[18:33] Charge balance equation is out by -90.2%  
[18:33] Stirrer speed set to 50  
[18:38] pH 3.49 -> 3.69  
[18:38] Using cautious pH adjust  
[18:38] Dispensed 0.000541 mL of Base (0.5 M KOH)  
[18:43] Stepping pH = 3.55  
[18:43] Dispensed 0.000753 mL of Base (0.5 M KOH)  
[18:48] Stepping pH = 3.63  
[18:48] Dispensed 0.000447 mL of Base (0.5 M KOH)  
[18:53] Stepping pH = 3.67  
[18:53] Dispensed 0.000188 mL of Base (0.5 M KOH)  
[18:58] Stepping pH = 3.68  
[18:59] Dispensed 0.000141 mL of Base (0.5 M KOH)  
[19:04] Stepping pH = 3.69  
[19:19] Stirrer speed set to 0  
[19:29] Datapoint id 10 collected  
[19:29] Charge balance equation is out by -90.4%  
[19:29] Stirrer speed set to 50  
[19:34] pH 3.68 -> 3.88  
[19:34] Using cautious pH adjust  
[19:34] Dispensed 0.000564 mL of Base (0.5 M KOH)  
[19:40] Stepping pH = 3.76  
[19:40] Dispensed 0.000564 mL of Base (0.5 M KOH)  
[19:45] Stepping pH = 3.85  
[19:45] Dispensed 0.000212 mL of Base (0.5 M KOH)  
[19:50] Stepping pH = 3.87  
[19:50] Dispensed 0.000141 mL of Base (0.5 M KOH)  
[19:55] Stepping pH = 3.89  
[20:10] Stirrer speed set to 0  
[20:20] Datapoint id 11 collected  
[20:20] Charge balance equation is out by -31.4%  
[20:20] Stirrer speed set to 50  
[20:25] pH 3.88 -> 4.08  
[20:25] Using cautious pH adjust  
[20:26] Dispensed 0.000659 mL of Base (0.5 M KOH)  
[20:31] Stepping pH = 4.01  
[20:31] Dispensed 0.000329 mL of Base (0.5 M KOH)  
[20:36] Stepping pH = 4.07  
[20:51] Stirrer speed set to 0  
[21:01] Datapoint id 12 collected  
[21:01] Charge balance equation is out by 25.7%

Sample name: **M16\_octanol**  
Assay name: **pH-metric high logP**  
Assay ID: **18C-01008**  
Filename: **C:\Sirius\_T3\Mehtap\20180228\_exp28\_logP\_T3-2\18C-01008\_M16\_octanol\_pH-metric high logP.t3r**

Experiment start time: **3/1/2018 10:41:05 AM**  
Analyst: **Pion**  
Instrument ID: **T312060**

## Experiment Log (continued)

[21:01] Stirrer speed set to 50  
[21:06] pH 4.07 -> 4.27  
[21:06] Using cautious pH adjust  
[21:06] Dispensed 0.000753 mL of Base (0.5 M KOH)  
[21:11] Stepping pH = 4.29  
[21:26] Stirrer speed set to 0  
[21:37] Datapoint id 13 collected  
[21:37] Charge balance equation is out by 50.0%  
[21:37] Stirrer speed set to 50  
[21:42] pH 4.28 -> 4.48  
[21:42] Using cautious pH adjust  
[21:42] Dispensed 0.000847 mL of Base (0.5 M KOH)  
[21:47] Stepping pH = 4.69  
[22:02] Stirrer speed set to 0  
[22:14] Datapoint id 14 collected  
[22:14] Charge balance equation is out by 50.0%  
[22:14] Stirrer speed set to 50  
[22:19] pH 4.68 -> 4.88  
[22:19] Using cautious pH adjust  
[22:19] Dispensed 0.000823 mL of Base (0.5 M KOH)  
[22:24] Stepping pH = 7.46  
[22:39] Stirrer speed set to 0  
[23:39] Datapoint id 15 collected  
[23:39] Charge balance equation is out by 50.0%  
[23:39] Stirrer speed set to 50  
[23:44] pH 7.86 -> 8.06  
[23:44] Using cautious pH adjust  
[23:44] Dispensed 0.000165 mL of Base (0.5 M KOH)  
[23:49] Stepping pH = 8.28  
[24:04] Stirrer speed set to 0  
[24:43] Datapoint id 16 collected  
[24:43] Charge balance equation is out by 50.0%  
[24:43] Stirrer speed set to 50  
[24:48] pH 8.16 -> 8.36  
[24:48] Using cautious pH adjust  
[24:48] Dispensed 0.000282 mL of Base (0.5 M KOH)  
[24:53] Stepping pH = 8.87  
[25:08] Stirrer speed set to 0  
[25:18] Datapoint id 17 collected  
[25:18] Charge balance equation is out by 50.0%  
[25:18] Stirrer speed set to 50  
[25:24] pH 8.85 -> 9.05  
[25:24] Using cautious pH adjust  
[25:24] Dispensed 0.000776 mL of Base (0.5 M KOH)  
[25:29] Stepping pH = 9.43  
[25:44] Stirrer speed set to 0  
[25:54] Datapoint id 18 collected  
[25:54] Charge balance equation is out by 50.0%  
[25:54] Stirrer speed set to 50  
[26:00] pH 9.41 -> 9.61  
[26:00] Using cautious pH adjust  
[26:00] Dispensed 0.000847 mL of Base (0.5 M KOH)  
[26:05] Stepping pH = 9.70  
[26:20] Stirrer speed set to 0  
[26:30] Datapoint id 19 collected  
[26:30] Charge balance equation is out by 50.0%  
[26:30] Stirrer speed set to 50  
[26:35] pH 9.69 -> 9.89  
[26:35] Using cautious pH adjust



Sample name: **M16\_octanol**  
Assay name: **pH-metric high logP**  
Assay ID: **18C-01008**  
Filename: **C:\Sirius\_T3\Mehtap\20180228\_exp28\_logP\_T3-2\18C-01008\_M16\_octanol\_pH-metric high logP.t3r**

Experiment start time: **3/1/2018 10:41:05 AM**  
Analyst: **Pion**  
Instrument ID: **T312060**

## Experiment Log (continued)

[26:35] Dispensed 0.000706 mL of Base (0.5 M KOH)  
[26:40] Stepping pH = 9.85  
[26:40] Dispensed 0.000165 mL of Base (0.5 M KOH)  
[26:45] Stepping pH = 9.86  
[26:45] Dispensed 0.000212 mL of Base (0.5 M KOH)  
[26:51] Stepping pH = 9.89  
[27:06] Stirrer speed set to 0  
[27:16] Datapoint id 20 collected  
[27:16] Charge balance equation is out by 23.1%  
[27:16] Stirrer speed set to 50  
[27:21] pH 9.87 -> 10.07  
[27:21] Using cautious pH adjust  
[27:21] Dispensed 0.000588 mL of Base (0.5 M KOH)  
[27:26] Stepping pH = 10.00  
[27:26] Dispensed 0.000282 mL of Base (0.5 M KOH)  
[27:31] Stepping pH = 10.04  
[27:31] Dispensed 0.000165 mL of Base (0.5 M KOH)  
[27:36] Stepping pH = 10.06  
[27:36] Dispensed 0.000071 mL of Base (0.5 M KOH)  
[27:42] Stepping pH = 10.07  
[27:57] Stirrer speed set to 0  
[28:07] Datapoint id 21 collected  
[28:07] Charge balance equation is out by 5.9%  
[28:07] Stirrer speed set to 50  
[28:12] pH 10.06 -> 10.26  
[28:12] Using charge balance adjust  
[28:12] Dispensed 0.001035 mL of Base (0.5 M KOH)  
[28:32] Stirrer speed set to 0  
[28:42] Datapoint id 22 collected  
[28:42] Charge balance equation is out by -19.8%  
[28:42] Stirrer speed set to 50  
[28:47] pH 10.23 -> 10.43  
[28:47] Using cautious pH adjust  
[28:47] Dispensed 0.000494 mL of Base (0.5 M KOH)  
[28:52] Stepping pH = 10.30  
[28:53] Dispensed 0.000517 mL of Base (0.5 M KOH)  
[28:58] Stepping pH = 10.37  
[28:58] Dispensed 0.000282 mL of Base (0.5 M KOH)  
[29:03] Stepping pH = 10.41  
[29:03] Dispensed 0.000118 mL of Base (0.5 M KOH)  
[29:08] Stepping pH = 10.42  
[29:23] Stirrer speed set to 0  
[29:34] Datapoint id 23 collected  
[29:34] Charge balance equation is out by -43.7%  
[29:34] Stirrer speed set to 50  
[29:39] pH 10.41 -> 10.61  
[29:39] Using cautious pH adjust  
[29:39] Dispensed 0.000517 mL of Base (0.5 M KOH)  
[29:44] Stepping pH = 10.48  
[29:44] Dispensed 0.000611 mL of Base (0.5 M KOH)  
[29:49] Stepping pH = 10.55  
[29:49] Dispensed 0.000376 mL of Base (0.5 M KOH)  
[29:54] Stepping pH = 10.59  
[29:54] Dispensed 0.000188 mL of Base (0.5 M KOH)  
[29:59] Stepping pH = 10.60  
[30:15] Stirrer speed set to 0  
[30:25] Datapoint id 24 collected  
[30:25] Charge balance equation is out by -63.3%  
[30:25] Stirrer speed set to 50

Sample name: **M16\_octanol**  
Assay name: **pH-metric high logP**  
Assay ID: **18C-01008**  
Filename: **C:\Sirius\_T3\Mehtap\20180228\_exp28\_logP\_T3-2\18C-01008\_M16\_octanol\_pH-metric high logP.t3r**

Experiment start time: **3/1/2018 10:41:05 AM**  
Analyst: **Pion**  
Instrument ID: **T312060**

## Experiment Log (continued)

[30:30] pH 10.60 -> 10.80  
[30:30] Using cautious pH adjust  
[30:30] Dispensed 0.000635 mL of Base (0.5 M KOH)  
[30:35] Stepping pH = 10.66  
[30:35] Dispensed 0.000776 mL of Base (0.5 M KOH)  
[30:40] Stepping pH = 10.73  
[30:40] Dispensed 0.000541 mL of Base (0.5 M KOH)  
[30:45] Stepping pH = 10.78  
[30:45] Dispensed 0.000188 mL of Base (0.5 M KOH)  
[30:51] Stepping pH = 10.79  
[31:06] Stirrer speed set to 0  
[31:16] Datapoint id 25 collected  
[31:16] Charge balance equation is out by -66.0%  
[31:16] Stirrer speed set to 50  
[31:21] pH 10.78 -> 10.98  
[31:21] Using cautious pH adjust  
[31:21] Dispensed 0.000870 mL of Base (0.5 M KOH)  
[31:26] Stepping pH = 10.84  
[31:27] Dispensed 0.001082 mL of Base (0.5 M KOH)  
[31:32] Stepping pH = 10.91  
[31:32] Dispensed 0.000800 mL of Base (0.5 M KOH)  
[31:37] Stepping pH = 10.96  
[31:37] Dispensed 0.000212 mL of Base (0.5 M KOH)  
[31:42] Stepping pH = 10.97  
[31:57] Stirrer speed set to 0  
[32:07] Datapoint id 26 collected  
[32:07] Charge balance equation is out by -71.2%  
[32:07] Stirrer speed set to 50  
[32:12] pH 10.96 -> 11.16  
[32:12] Using cautious pH adjust  
[32:12] Dispensed 0.001246 mL of Base (0.5 M KOH)  
[32:17] Stepping pH = 11.04  
[32:17] Dispensed 0.001270 mL of Base (0.5 M KOH)  
[32:23] Stepping pH = 11.12  
[32:23] Dispensed 0.000588 mL of Base (0.5 M KOH)  
[32:28] Stepping pH = 11.15  
[32:43] Stirrer speed set to 0  
[32:53] Datapoint id 27 collected  
[32:53] Charge balance equation is out by -24.0%  
[32:53] Stirrer speed set to 50  
[32:58] pH 11.15 -> 11.35  
[32:58] Using cautious pH adjust  
[32:58] Dispensed 0.001881 mL of Base (0.5 M KOH)  
[33:03] Stepping pH = 11.25  
[33:03] Dispensed 0.001505 mL of Base (0.5 M KOH)  
[33:09] Stepping pH = 11.31  
[33:09] Dispensed 0.000729 mL of Base (0.5 M KOH)  
[33:14] Stepping pH = 11.34  
[33:14] Dispensed 0.000353 mL of Base (0.5 M KOH)  
[33:19] Stepping pH = 11.34  
[33:34] Stirrer speed set to 0  
[33:44] Datapoint id 28 collected  
[33:44] Charge balance equation is out by -18.0%  
[33:44] Stirrer speed set to 50  
[33:49] pH 11.34 -> 11.54  
[33:49] Using cautious pH adjust  
[33:49] Dispensed 0.002916 mL of Base (0.5 M KOH)  
[33:54] Stepping pH = 11.44  
[33:55] Dispensed 0.002328 mL of Base (0.5 M KOH)



Sample name: **M16\_octanol**  
Assay name: **pH-metric high logP**  
Assay ID: **18C-01008**  
Filename: **C:\Sirius\_T3\Mehtap\20180228\_exp28\_logP\_T3-2\18C-01008\_M16\_octanol\_pH-metric high logP.t3r**

Experiment start time: **3/1/2018 10:41:05 AM**  
Analyst: **Pion**  
Instrument ID: **T312060**

## Experiment Log (continued)

[34:00] Stepping pH = 11.52  
[34:00] Dispensed 0.000564 mL of Base (0.5 M KOH)  
[34:05] Stepping pH = 11.54  
[34:20] Stirrer speed set to 0  
[34:30] Datapoint id 29 collected  
[34:30] Charge balance equation is out by 0.7%  
[34:30] Stirrer speed set to 50  
[34:35] pH 11.54 -> 11.74  
[34:35] Using charge balance adjust  
[34:36] Dispensed 0.009219 mL of Base (0.5 M KOH)  
[34:56] Stirrer speed set to 0  
[35:06] Datapoint id 30 collected  
[35:06] Charge balance equation is out by -12.5%  
[35:06] Stirrer speed set to 50  
[35:11] pH 11.72 -> 11.92  
[35:11] Using charge balance adjust  
[35:11] Dispensed 0.014252 mL of Base (0.5 M KOH)  
[35:31] Stirrer speed set to 0  
[35:42] Datapoint id 31 collected  
[35:42] Charge balance equation is out by -7.9%  
[35:42] Stirrer speed set to 50  
[35:47] pH 11.91 -> 12.05  
[35:47] Using charge balance adjust  
[35:47] Dispensed 0.014722 mL of Base (0.5 M KOH)  
[36:07] Stirrer speed set to 0  
[36:17] Datapoint id 32 collected  
[36:17] Charge balance equation is out by -36.5%  
[36:17] Titration 2 of 3  
[36:17] Adding initial titrants  
[36:17] Automatically add 0.10000 mL of Octanol  
[36:20] Dispensed 0.100000 mL of Octanol  
[36:20] Stirrer speed set to 10  
[36:21] Stirrer speed set to 55  
[36:21] Iterative adjust 12.04 -> 2.00  
[36:21] pH 12.04 -> 2.00  
[36:23] Dispensed 0.100000 mL of Acid (0.5 M HCl)  
[36:28] pH 2.29 -> 2.00  
[36:29] Dispensed 0.024106 mL of Acid (0.5 M HCl)  
[36:34] pH 2.03 -> 2.00  
[36:34] Dispensed 0.003104 mL of Acid (0.5 M HCl)  
[37:25] Stirrer speed set to 0  
[37:35] Datapoint id 33 collected  
[37:35] Stirrer speed set to 55  
[37:40] pH 1.97 -> 2.17  
[37:40] Using cautious pH adjust  
[37:40] Dispensed 0.009995 mL of Base (0.5 M KOH)  
[37:45] Stepping pH = 2.06  
[37:46] Dispensed 0.007291 mL of Base (0.5 M KOH)  
[37:51] Stepping pH = 2.13  
[37:51] Dispensed 0.002422 mL of Base (0.5 M KOH)  
[37:56] Stepping pH = 2.17  
[38:11] Stirrer speed set to 0  
[38:21] Datapoint id 34 collected  
[38:21] Charge balance equation is out by 1.4%  
[38:21] Stirrer speed set to 55  
[38:26] pH 2.17 -> 2.37  
[38:26] Using charge balance adjust  
[38:26] Dispensed 0.012347 mL of Base (0.5 M KOH)  
[38:47] Stirrer speed set to 0

Sample name: **M16\_octanol**  
Assay name: **pH-metric high logP**  
Assay ID: **18C-01008**  
Filename: **C:\Sirius\_T3\Mehtap\20180228\_exp28\_logP\_T3-2\18C-01008\_M16\_octanol\_pH-metric high logP.t3r**

Experiment start time: **3/1/2018 10:41:05 AM**  
Analyst: **Pion**  
Instrument ID: **T312060**

## Experiment Log (continued)

[39:01] Datapoint id 35 collected  
[39:01] Charge balance equation is out by -4.4%  
[39:01] Stirrer speed set to 55  
[39:06] pH 2.37 -> 2.57  
[39:06] Using charge balance adjust  
[39:07] Dispensed 0.007855 mL of Base (0.5 M KOH)  
[39:27] Stirrer speed set to 0  
[39:37] Datapoint id 36 collected  
[39:37] Charge balance equation is out by -10.3%  
[39:37] Stirrer speed set to 55  
[39:42] pH 2.56 -> 2.76  
[39:42] Using charge balance adjust  
[39:42] Dispensed 0.005198 mL of Base (0.5 M KOH)  
[40:02] Stirrer speed set to 0  
[40:12] Datapoint id 37 collected  
[40:12] Charge balance equation is out by -18.8%  
[40:12] Stirrer speed set to 55  
[40:18] pH 2.73 -> 2.93  
[40:18] Using cautious pH adjust  
[40:18] Dispensed 0.001811 mL of Base (0.5 M KOH)  
[40:23] Stepping pH = 2.81  
[40:23] Dispensed 0.001552 mL of Base (0.5 M KOH)  
[40:28] Stepping pH = 2.88  
[40:28] Dispensed 0.000729 mL of Base (0.5 M KOH)  
[40:33] Stepping pH = 2.91  
[40:33] Dispensed 0.000259 mL of Base (0.5 M KOH)  
[40:38] Stepping pH = 2.93  
[40:54] Stirrer speed set to 0  
[41:04] Datapoint id 38 collected  
[41:04] Charge balance equation is out by -19.6%  
[41:04] Stirrer speed set to 55  
[41:09] pH 2.93 -> 3.13  
[41:09] Using cautious pH adjust  
[41:09] Dispensed 0.001223 mL of Base (0.5 M KOH)  
[41:14] Stepping pH = 2.98  
[41:14] Dispensed 0.001576 mL of Base (0.5 M KOH)  
[41:19] Stepping pH = 3.07  
[41:19] Dispensed 0.000800 mL of Base (0.5 M KOH)  
[41:24] Stepping pH = 3.12  
[41:40] Stirrer speed set to 0  
[41:50] Datapoint id 39 collected  
[41:50] Charge balance equation is out by -46.4%  
[41:50] Stirrer speed set to 55  
[41:55] pH 3.12 -> 3.32  
[41:55] Using cautious pH adjust  
[41:55] Dispensed 0.000917 mL of Base (0.5 M KOH)  
[42:00] Stepping pH = 3.18  
[42:00] Dispensed 0.001105 mL of Base (0.5 M KOH)  
[42:05] Stepping pH = 3.28  
[42:05] Dispensed 0.000400 mL of Base (0.5 M KOH)  
[42:10] Stepping pH = 3.32  
[42:25] Stirrer speed set to 0  
[42:36] Datapoint id 40 collected  
[42:36] Charge balance equation is out by -32.0%  
[42:36] Stirrer speed set to 55  
[42:41] pH 3.32 -> 3.52  
[42:41] Using cautious pH adjust  
[42:41] Dispensed 0.000776 mL of Base (0.5 M KOH)  
[42:46] Stepping pH = 3.40

Sample name: **M16\_octanol**  
 Assay name: **pH-metric high logP**  
 Assay ID: **18C-01008**  
 Filename: **C:\Sirius\_T3\Mehtap\20180228\_exp28\_logP\_T3-2\18C-01008\_M16\_octanol\_pH-metric high logP.t3r**

Experiment start time: **3/1/2018 10:41:05 AM**  
 Analyst: **Pion**  
 Instrument ID: **T312060**

## Experiment Log (continued)

[42:46] Dispensed 0.000753 mL of Base (0.5 M KOH)  
 [42:51] Stepping pH = 3.48  
 [42:51] Dispensed 0.000282 mL of Base (0.5 M KOH)  
 [42:57] Stepping pH = 3.51  
 [43:12] Stirrer speed set to 0  
 [43:22] Datapoint id 41 collected  
 [43:22] Charge balance equation is out by -16.3%  
 [43:22] Stirrer speed set to 55  
 [43:27] pH 3.52 -> 3.72  
 [43:27] Using cautious pH adjust  
 [43:27] Dispensed 0.000753 mL of Base (0.5 M KOH)  
 [43:32] Stepping pH = 3.61  
 [43:32] Dispensed 0.000564 mL of Base (0.5 M KOH)  
 [43:37] Stepping pH = 3.69  
 [43:37] Dispensed 0.000141 mL of Base (0.5 M KOH)  
 [43:42] Stepping pH = 3.71  
 [43:57] Stirrer speed set to 0  
 [44:14] Datapoint id 42 collected  
 [44:14] Charge balance equation is out by 4.1%  
 [44:14] Stirrer speed set to 55  
 [44:19] pH 3.71 -> 3.91  
 [44:19] Using charge balance adjust  
 [44:19] Dispensed 0.001599 mL of Base (0.5 M KOH)  
 [44:39] Stirrer speed set to 0  
 [44:49] Datapoint id 43 collected  
 [44:49] Charge balance equation is out by 96.0%  
 [44:49] Stirrer speed set to 55  
 [44:55] pH 4.11 -> 4.31  
 [44:55] Using cautious pH adjust  
 [44:55] Dispensed 0.000917 mL of Base (0.5 M KOH)  
 [45:00] Stepping pH = 4.50  
 [45:15] Stirrer speed set to 0  
 [45:25] Datapoint id 44 collected  
 [45:25] Charge balance equation is out by 50.0%  
 [45:25] Stirrer speed set to 55  
 [45:31] pH 4.51 -> 4.71  
 [45:31] Using cautious pH adjust  
 [45:31] Dispensed 0.000800 mL of Base (0.5 M KOH)  
 [45:36] Stepping pH = 6.63  
 [45:51] Stirrer speed set to 0  
 [46:51] Datapoint id 45 collected  
 [46:51] Charge balance equation is out by 50.0%  
 [46:51] Stirrer speed set to 55  
 [46:56] pH 6.57 -> 6.77  
 [46:56] Using cautious pH adjust  
 [46:56] Dispensed 0.000047 mL of Base (0.5 M KOH)  
 [47:01] Stepping pH = 6.51  
 [47:01] Dispensed 0.000259 mL of Base (0.5 M KOH)  
 [47:06] Stepping pH = 8.44  
 [47:21] Stirrer speed set to 0  
 [48:05] Datapoint id 46 collected  
 [48:05] Charge balance equation is out by -289.9%  
 [48:05] Stirrer speed set to 55  
 [48:10] pH 8.37 -> 8.57  
 [48:10] Using cautious pH adjust  
 [48:10] Dispensed 0.000259 mL of Base (0.5 M KOH)  
 [48:15] Stepping pH = 9.01  
 [48:30] Stirrer speed set to 0  
 [48:49] Datapoint id 47 collected

Sample name: **M16\_octanol**  
Assay name: **pH-metric high logP**  
Assay ID: **18C-01008**  
Filename: **C:\Sirius\_T3\Mehtap\20180228\_exp28\_logP\_T3-2\18C-01008\_M16\_octanol\_pH-metric high logP.t3r**

Experiment start time: **3/1/2018 10:41:05 AM**  
Analyst: **Pion**  
Instrument ID: **T312060**

## Experiment Log (continued)

[48:49] Charge balance equation is out by 50.0%  
[48:49] Stirrer speed set to 55  
[48:55] pH 8.98 -> 9.18  
[48:55] Using cautious pH adjust  
[48:55] Dispensed 0.000682 mL of Base (0.5 M KOH)  
[49:00] Stepping pH = 9.60  
[49:15] Stirrer speed set to 0  
[49:26] Datapoint id 48 collected  
[49:26] Charge balance equation is out by 50.0%  
[49:26] Stirrer speed set to 55  
[49:31] pH 9.59 -> 9.79  
[49:31] Using cautious pH adjust  
[49:32] Dispensed 0.000917 mL of Base (0.5 M KOH)  
[49:37] Stepping pH = 9.96  
[49:52] Stirrer speed set to 0  
[50:02] Datapoint id 49 collected  
[50:02] Charge balance equation is out by 50.0%  
[50:02] Stirrer speed set to 55  
[50:07] pH 9.95 -> 10.15  
[50:07] Using cautious pH adjust  
[50:07] Dispensed 0.000776 mL of Base (0.5 M KOH)  
[50:13] Stepping pH = 10.16  
[50:28] Stirrer speed set to 0  
[50:38] Datapoint id 50 collected  
[50:38] Charge balance equation is out by 50.0%  
[50:38] Stirrer speed set to 55  
[50:43] pH 10.16 -> 10.36  
[50:43] Using cautious pH adjust  
[50:43] Dispensed 0.000706 mL of Base (0.5 M KOH)  
[50:48] Stepping pH = 10.30  
[50:48] Dispensed 0.000259 mL of Base (0.5 M KOH)  
[50:53] Stepping pH = 10.34  
[50:53] Dispensed 0.000094 mL of Base (0.5 M KOH)  
[50:58] Stepping pH = 10.35  
[50:58] Dispensed 0.000094 mL of Base (0.5 M KOH)  
[51:03] Stepping pH = 10.36  
[51:19] Stirrer speed set to 0  
[51:29] Datapoint id 51 collected  
[51:29] Charge balance equation is out by 19.2%  
[51:29] Stirrer speed set to 55  
[51:34] pH 10.35 -> 10.55  
[51:34] Using cautious pH adjust  
[51:34] Dispensed 0.000682 mL of Base (0.5 M KOH)  
[51:39] Stepping pH = 10.45  
[51:39] Dispensed 0.000517 mL of Base (0.5 M KOH)  
[51:44] Stepping pH = 10.51  
[51:44] Dispensed 0.000282 mL of Base (0.5 M KOH)  
[51:49] Stepping pH = 10.54  
[51:49] Dispensed 0.000118 mL of Base (0.5 M KOH)  
[51:55] Stepping pH = 10.55  
[52:10] Stirrer speed set to 0  
[52:20] Datapoint id 52 collected  
[52:20] Charge balance equation is out by -16.9%  
[52:20] Stirrer speed set to 55  
[52:25] pH 10.54 -> 10.74  
[52:25] Using cautious pH adjust  
[52:25] Dispensed 0.000753 mL of Base (0.5 M KOH)  
[52:30] Stepping pH = 10.61  
[52:30] Dispensed 0.000823 mL of Base (0.5 M KOH)

Sample name: **M16\_octanol**  
Assay name: **pH-metric high logP**  
Assay ID: **18C-01008**  
Filename: **C:\Sirius\_T3\Mehtap\20180228\_exp28\_logP\_T3-2\18C-01008\_M16\_octanol\_pH-metric high logP.t3r**

Experiment start time: **3/1/2018 10:41:05 AM**  
Analyst: **Pion**  
Instrument ID: **T312060**

## Experiment Log (continued)

[52:36] Stepping pH = 10.68  
[52:36] Dispensed 0.000588 mL of Base (0.5 M KOH)  
[52:41] Stepping pH = 10.72  
[52:41] Dispensed 0.000212 mL of Base (0.5 M KOH)  
[52:46] Stepping pH = 10.73  
[53:01] Stirrer speed set to 0  
[53:11] Datapoint id 53 collected  
[53:11] Charge balance equation is out by -57.5%  
[53:11] Stirrer speed set to 55  
[53:16] pH 10.73 -> 10.93  
[53:16] Using cautious pH adjust  
[53:16] Dispensed 0.000964 mL of Base (0.5 M KOH)  
[53:21] Stepping pH = 10.79  
[53:21] Dispensed 0.001176 mL of Base (0.5 M KOH)  
[53:27] Stepping pH = 10.87  
[53:27] Dispensed 0.000659 mL of Base (0.5 M KOH)  
[53:32] Stepping pH = 10.92  
[53:32] Dispensed 0.000165 mL of Base (0.5 M KOH)  
[53:37] Stepping pH = 10.92  
[53:52] Stirrer speed set to 0  
[54:02] Datapoint id 54 collected  
[54:02] Charge balance equation is out by -53.2%  
[54:02] Stirrer speed set to 55  
[54:07] pH 10.92 -> 11.12  
[54:07] Using cautious pH adjust  
[54:07] Dispensed 0.001364 mL of Base (0.5 M KOH)  
[54:12] Stepping pH = 11.00  
[54:13] Dispensed 0.001317 mL of Base (0.5 M KOH)  
[54:18] Stepping pH = 11.07  
[54:18] Dispensed 0.000706 mL of Base (0.5 M KOH)  
[54:23] Stepping pH = 11.11  
[54:23] Dispensed 0.000235 mL of Base (0.5 M KOH)  
[54:28] Stepping pH = 11.12  
[54:43] Stirrer speed set to 0  
[54:53] Datapoint id 55 collected  
[54:53] Charge balance equation is out by -31.5%  
[54:53] Stirrer speed set to 55  
[54:58] pH 11.11 -> 11.31  
[54:58] Using cautious pH adjust  
[54:58] Dispensed 0.002023 mL of Base (0.5 M KOH)  
[55:03] Stepping pH = 11.19  
[55:04] Dispensed 0.002093 mL of Base (0.5 M KOH)  
[55:09] Stepping pH = 11.27  
[55:09] Dispensed 0.001058 mL of Base (0.5 M KOH)  
[55:14] Stepping pH = 11.30  
[55:29] Stirrer speed set to 0  
[55:39] Datapoint id 56 collected  
[55:39] Charge balance equation is out by -27.4%  
[55:39] Stirrer speed set to 55  
[55:44] pH 11.30 -> 11.50  
[55:44] Using cautious pH adjust  
[55:44] Dispensed 0.003081 mL of Base (0.5 M KOH)  
[55:49] Stepping pH = 11.40  
[55:50] Dispensed 0.002446 mL of Base (0.5 M KOH)  
[55:55] Stepping pH = 11.46  
[55:55] Dispensed 0.001129 mL of Base (0.5 M KOH)  
[56:00] Stepping pH = 11.49  
[56:15] Stirrer speed set to 0  
[56:25] Datapoint id 57 collected

Sample name: **M16\_octanol**  
Assay name: **pH-metric high logP**  
Assay ID: **18C-01008**  
Filename: **C:\Sirius\_T3\Mehtap\20180228\_exp28\_logP\_T3-2\18C-01008\_M16\_octanol\_pH-metric high logP.t3r**

Experiment start time: **3/1/2018 10:41:05 AM**  
Analyst: **Pion**  
Instrument ID: **T312060**

## Experiment Log (continued)

[56:25] Charge balance equation is out by -7.6%  
[56:25] Stirrer speed set to 55  
[56:30] pH 11.49 -> 11.69  
[56:30] Using charge balance adjust  
[56:30] Dispensed 0.009572 mL of Base (0.5 M KOH)  
[56:51] Stirrer speed set to 0  
[57:01] Datapoint id 58 collected  
[57:01] Charge balance equation is out by -13.0%  
[57:01] Stirrer speed set to 55  
[57:06] pH 11.67 -> 11.87  
[57:06] Using charge balance adjust  
[57:06] Dispensed 0.014652 mL of Base (0.5 M KOH)  
[57:26] Stirrer speed set to 0  
[57:36] Datapoint id 59 collected  
[57:36] Charge balance equation is out by -6.6%  
[57:36] Stirrer speed set to 55  
[57:41] pH 11.86 -> 12.05  
[57:41] Using charge balance adjust  
[57:42] Dispensed 0.022013 mL of Base (0.5 M KOH)  
[58:02] Stirrer speed set to 0  
[58:12] Datapoint id 60 collected  
[58:12] Charge balance equation is out by -13.7%  
[58:12] Titration 3 of 3  
[58:12] Adding initial titrants  
[58:12] Automatically add 0.30000 mL of Octanol  
[58:19] Dispensed 0.300000 mL of Octanol  
[58:19] Stirrer speed set to 10  
[58:20] Stirrer speed set to 60  
[58:20] Iterative adjust 12.04 -> 2.00  
[58:20] pH 12.04 -> 2.00  
[58:23] Dispensed 0.100000 mL of Acid (0.5 M HCl)  
[58:28] pH 2.44 -> 2.00  
[58:29] Dispensed 0.036007 mL of Acid (0.5 M HCl)  
[58:34] pH 2.04 -> 2.00  
[58:34] Dispensed 0.005033 mL of Acid (0.5 M HCl)  
[59:25] Stirrer speed set to 0  
[59:35] Datapoint id 61 collected  
[59:35] Stirrer speed set to 60  
[59:40] pH 1.97 -> 2.17  
[59:40] Using cautious pH adjust  
[59:40] Dispensed 0.011359 mL of Base (0.5 M KOH)  
[59:45] Stepping pH = 2.05  
[59:45] Dispensed 0.009595 mL of Base (0.5 M KOH)  
[59:51] Stepping pH = 2.15  
[59:51] Dispensed 0.002140 mL of Base (0.5 M KOH)  
[59:56] Stepping pH = 2.17  
[1:00:11] Stirrer speed set to 0  
[1:00:28] Datapoint id 62 collected  
[1:00:28] Charge balance equation is out by -1.7%  
[1:00:28] Stirrer speed set to 60  
[1:00:34] pH 2.18 -> 2.38  
[1:00:34] Using charge balance adjust  
[1:00:34] Dispensed 0.013993 mL of Base (0.5 M KOH)  
[1:00:54] Stirrer speed set to 0  
[1:01:04] Datapoint id 63 collected  
[1:01:04] Charge balance equation is out by -6.3%  
[1:01:04] Stirrer speed set to 60  
[1:01:09] pH 2.38 -> 2.58  
[1:01:09] Using charge balance adjust



Sample name: **M16\_octanol**  
Assay name: **pH-metric high logP**  
Assay ID: **18C-01008**  
Filename: **C:\Sirius\_T3\Mehtap\20180228\_exp28\_logP\_T3-2\18C-01008\_M16\_octanol\_pH-metric high logP.t3r**

Experiment start time: **3/1/2018 10:41:05 AM**  
Analyst: **Pion**  
Instrument ID: **T312060**

## Experiment Log (continued)

[1:01:10] Dispensed 0.009008 mL of Base (0.5 M KOH)  
[1:01:30] Stirrer speed set to 0  
[1:01:40] Datapoint id 64 collected  
[1:01:40] Charge balance equation is out by -15.0%  
[1:01:40] Stirrer speed set to 60  
[1:01:45] pH 2.56 -> 2.76  
[1:01:45] Using cautious pH adjust  
[1:01:45] Dispensed 0.003057 mL of Base (0.5 M KOH)  
[1:01:50] Stepping pH = 2.62  
[1:01:50] Dispensed 0.003198 mL of Base (0.5 M KOH)  
[1:01:55] Stepping pH = 2.72  
[1:01:56] Dispensed 0.001035 mL of Base (0.5 M KOH)  
[1:02:01] Stepping pH = 2.75  
[1:02:16] Stirrer speed set to 0  
[1:02:26] Datapoint id 65 collected  
[1:02:26] Charge balance equation is out by -19.0%  
[1:02:26] Stirrer speed set to 60  
[1:02:31] pH 2.76 -> 2.96  
[1:02:31] Using cautious pH adjust  
[1:02:31] Dispensed 0.002046 mL of Base (0.5 M KOH)  
[1:02:36] Stepping pH = 2.84  
[1:02:36] Dispensed 0.001834 mL of Base (0.5 M KOH)  
[1:02:41] Stepping pH = 2.92  
[1:02:41] Dispensed 0.000776 mL of Base (0.5 M KOH)  
[1:02:47] Stepping pH = 2.95  
[1:03:02] Stirrer speed set to 0  
[1:03:12] Datapoint id 66 collected  
[1:03:12] Charge balance equation is out by -13.9%  
[1:03:12] Stirrer speed set to 60  
[1:03:17] pH 2.96 -> 3.16  
[1:03:17] Using charge balance adjust  
[1:03:17] Dispensed 0.002940 mL of Base (0.5 M KOH)  
[1:03:37] Stirrer speed set to 0  
[1:03:55] Datapoint id 67 collected  
[1:03:55] Charge balance equation is out by -11.3%  
[1:03:55] Stirrer speed set to 60  
[1:04:00] pH 3.14 -> 3.34  
[1:04:00] Using charge balance adjust  
[1:04:00] Dispensed 0.002399 mL of Base (0.5 M KOH)  
[1:04:20] Stirrer speed set to 0  
[1:04:30] Datapoint id 68 collected  
[1:04:30] Charge balance equation is out by 13.3%  
[1:04:30] Stirrer speed set to 60  
[1:04:35] pH 3.37 -> 3.57  
[1:04:35] Using charge balance adjust  
[1:04:35] Dispensed 0.002117 mL of Base (0.5 M KOH)  
[1:04:56] Stirrer speed set to 0  
[1:05:06] Datapoint id 69 collected  
[1:05:06] Charge balance equation is out by 44.0%  
[1:05:06] Stirrer speed set to 60  
[1:05:11] pH 3.67 -> 3.87  
[1:05:11] Using cautious pH adjust  
[1:05:11] Dispensed 0.001035 mL of Base (0.5 M KOH)  
[1:05:16] Stepping pH = 3.90  
[1:05:31] Stirrer speed set to 0  
[1:05:41] Datapoint id 70 collected  
[1:05:41] Charge balance equation is out by 50.0%  
[1:05:41] Stirrer speed set to 60  
[1:05:46] pH 3.90 -> 4.10

Sample name: **M16\_octanol**  
Assay name: **pH-metric high logP**  
Assay ID: **18C-01008**  
Filename: **C:\Sirius\_T3\Mehtap\20180228\_exp28\_logP\_T3-2\18C-01008\_M16\_octanol\_pH-metric high logP.t3r**

Experiment start time: **3/1/2018 10:41:05 AM**  
Analyst: **Pion**  
Instrument ID: **T312060**

## Experiment Log (continued)

[1:05:46] Using cautious pH adjust  
[1:05:46] Dispensed 0.000988 mL of Base (0.5 M KOH)  
[1:05:51] Stepping pH = 4.36  
[1:06:06] Stirrer speed set to 0  
[1:06:17] Datapoint id 71 collected  
[1:06:17] Charge balance equation is out by 50.0%  
[1:06:17] Stirrer speed set to 60  
[1:06:22] pH 4.36 -> 4.56  
[1:06:22] Using cautious pH adjust  
[1:06:22] Dispensed 0.000682 mL of Base (0.5 M KOH)  
[1:06:27] Stepping pH = 5.66  
[1:06:42] Stirrer speed set to 0  
[1:07:02] Datapoint id 72 collected  
[1:07:02] Charge balance equation is out by 50.0%  
[1:07:02] Stirrer speed set to 60  
[1:07:08] pH 5.46 -> 5.66  
[1:07:08] Using cautious pH adjust  
[1:07:08] Dispensed 0.000094 mL of Base (0.5 M KOH)  
[1:07:13] Stepping pH = 5.60  
[1:07:13] Dispensed 0.000047 mL of Base (0.5 M KOH)  
[1:07:18] Stepping pH = 5.79  
[1:07:33] Stirrer speed set to 0  
[1:07:53] Datapoint id 73 collected  
[1:07:53] Charge balance equation is out by 32.1%  
[1:07:53] Stirrer speed set to 60  
[1:07:58] pH 5.73 -> 5.93  
[1:07:58] Using cautious pH adjust  
[1:07:58] Dispensed 0.000071 mL of Base (0.5 M KOH)  
[1:08:03] Stepping pH = 6.04  
[1:08:18] Stirrer speed set to 0  
[1:08:36] Datapoint id 74 collected  
[1:08:36] Charge balance equation is out by 50.0%  
[1:08:36] Stirrer speed set to 60  
[1:08:41] pH 5.99 -> 6.19  
[1:08:41] Using cautious pH adjust  
[1:08:41] Dispensed 0.000047 mL of Base (0.5 M KOH)  
[1:08:46] Stepping pH = 6.27  
[1:09:01] Stirrer speed set to 0  
[1:09:29] Datapoint id 75 collected  
[1:09:29] Charge balance equation is out by 50.0%  
[1:09:29] Stirrer speed set to 60  
[1:09:34] pH 6.09 -> 6.29  
[1:09:34] Using cautious pH adjust  
[1:09:35] Dispensed 0.000047 mL of Base (0.5 M KOH)  
[1:09:40] Stepping pH = 6.48  
[1:09:55] Stirrer speed set to 0  
[1:10:29] Datapoint id 76 collected  
[1:10:29] Charge balance equation is out by 50.0%  
[1:10:29] Stirrer speed set to 60  
[1:10:34] pH 6.42 -> 6.62  
[1:10:34] Using cautious pH adjust  
[1:10:34] Dispensed 0.000047 mL of Base (0.5 M KOH)  
[1:10:39] Stepping pH = 6.76  
[1:10:54] Stirrer speed set to 0  
[1:11:35] Datapoint id 77 collected  
[1:11:35] Charge balance equation is out by 50.0%  
[1:11:35] Stirrer speed set to 60  
[1:11:40] pH 6.79 -> 6.99  
[1:11:40] Using cautious pH adjust



Sample name: **M16\_octanol**  
Assay name: **pH-metric high logP**  
Assay ID: **18C-01008**  
Filename: **C:\Sirius\_T3\Mehtap\20180228\_exp28\_logP\_T3-2\18C-01008\_M16\_octanol\_pH-metric high logP.t3r**

Experiment start time: **3/1/2018 10:41:05 AM**  
Analyst: **Pion**  
Instrument ID: **T312060**

## Experiment Log (continued)

[1:11:40] Dispensed 0.000024 mL of Base (0.5 M KOH)  
[1:11:45] Stepping pH = 6.86  
[1:11:45] Dispensed 0.000024 mL of Base (0.5 M KOH)  
[1:11:50] Stepping pH = 7.15  
[1:12:05] Stirrer speed set to 0  
[1:13:05] Datapoint id 78 collected  
[1:13:05] Charge balance equation is out by -4.3%  
[1:13:05] Stirrer speed set to 60  
[1:13:10] pH 6.87 -> 7.07  
[1:13:10] Using charge balance adjust  
[1:13:10] Dispensed 0.000047 mL of Base (0.5 M KOH)  
[1:13:31] Stirrer speed set to 0  
[1:14:31] Datapoint id 79 collected  
[1:14:31] Charge balance equation is out by 129.5%  
[1:14:31] Stirrer speed set to 60  
[1:14:36] pH 7.26 -> 7.46  
[1:14:36] Using cautious pH adjust  
[1:14:36] Dispensed 0.000024 mL of Base (0.5 M KOH)  
[1:14:41] Stepping pH = 7.23  
[1:14:41] Dispensed 0.000118 mL of Base (0.5 M KOH)  
[1:14:46] Stepping pH = 8.40  
[1:15:01] Stirrer speed set to 0  
[1:16:01] Datapoint id 80 collected  
[1:16:01] Charge balance equation is out by -238.7%  
[1:16:01] Stirrer speed set to 60  
[1:16:06] pH 8.30 -> 8.50  
[1:16:06] Using cautious pH adjust  
[1:16:06] Dispensed 0.000118 mL of Base (0.5 M KOH)  
[1:16:11] Stepping pH = 8.60  
[1:16:27] Stirrer speed set to 0  
[1:16:46] Datapoint id 81 collected  
[1:16:46] Charge balance equation is out by 50.0%  
[1:16:46] Stirrer speed set to 60  
[1:16:51] pH 8.54 -> 8.74  
[1:16:51] Using cautious pH adjust  
[1:16:51] Dispensed 0.000188 mL of Base (0.5 M KOH)  
[1:16:56] Stepping pH = 8.96  
[1:17:11] Stirrer speed set to 0  
[1:17:25] Datapoint id 82 collected  
[1:17:25] Charge balance equation is out by 50.0%  
[1:17:25] Stirrer speed set to 60  
[1:17:30] pH 8.94 -> 9.14  
[1:17:30] Using cautious pH adjust  
[1:17:30] Dispensed 0.000423 mL of Base (0.5 M KOH)  
[1:17:35] Stepping pH = 9.41  
[1:17:50] Stirrer speed set to 0  
[1:18:02] Datapoint id 83 collected  
[1:18:02] Charge balance equation is out by 50.0%  
[1:18:02] Stirrer speed set to 60  
[1:18:07] pH 9.39 -> 9.59  
[1:18:07] Using cautious pH adjust  
[1:18:08] Dispensed 0.000776 mL of Base (0.5 M KOH)  
[1:18:13] Stepping pH = 9.83  
[1:18:28] Stirrer speed set to 0  
[1:18:38] Datapoint id 84 collected  
[1:18:38] Charge balance equation is out by 50.0%  
[1:18:38] Stirrer speed set to 60  
[1:18:43] pH 9.82 -> 10.02  
[1:18:43] Using cautious pH adjust

Sample name: **M16\_octanol**  
Assay name: **pH-metric high logP**  
Assay ID: **18C-01008**  
Filename: **C:\Sirius\_T3\Mehtap\20180228\_exp28\_logP\_T3-2\18C-01008\_M16\_octanol\_pH-metric high logP.t3r**

Experiment start time: **3/1/2018 10:41:05 AM**  
Analyst: **Pion**  
Instrument ID: **T312060**

## Experiment Log (continued)

[1:18:43] Dispensed 0.000988 mL of Base (0.5 M KOH)  
[1:18:48] Stepping pH = 10.15  
[1:19:04] Stirrer speed set to 0  
[1:19:14] Datapoint id 85 collected  
[1:19:14] Charge balance equation is out by 50.0%  
[1:19:14] Stirrer speed set to 60  
[1:19:19] pH 10.14 -> 10.34  
[1:19:19] Using cautious pH adjust  
[1:19:19] Dispensed 0.000988 mL of Base (0.5 M KOH)  
[1:19:24] Stepping pH = 10.37  
[1:19:39] Stirrer speed set to 0  
[1:19:49] Datapoint id 86 collected  
[1:19:49] Charge balance equation is out by 50.1%  
[1:19:49] Stirrer speed set to 60  
[1:19:54] pH 10.36 -> 10.56  
[1:19:54] Using cautious pH adjust  
[1:19:54] Dispensed 0.000964 mL of Base (0.5 M KOH)  
[1:19:59] Stepping pH = 10.51  
[1:19:59] Dispensed 0.000306 mL of Base (0.5 M KOH)  
[1:20:05] Stepping pH = 10.54  
[1:20:05] Dispensed 0.000141 mL of Base (0.5 M KOH)  
[1:20:10] Stepping pH = 10.55  
[1:20:25] Stirrer speed set to 0  
[1:20:35] Datapoint id 87 collected  
[1:20:35] Charge balance equation is out by 27.0%  
[1:20:35] Stirrer speed set to 60  
[1:20:40] pH 10.55 -> 10.75  
[1:20:40] Using cautious pH adjust  
[1:20:40] Dispensed 0.001058 mL of Base (0.5 M KOH)  
[1:20:45] Stepping pH = 10.66  
[1:20:45] Dispensed 0.000659 mL of Base (0.5 M KOH)  
[1:20:50] Stepping pH = 10.71  
[1:20:50] Dispensed 0.000329 mL of Base (0.5 M KOH)  
[1:20:56] Stepping pH = 10.73  
[1:20:56] Dispensed 0.000188 mL of Base (0.5 M KOH)  
[1:21:01] Stepping pH = 10.74  
[1:21:16] Stirrer speed set to 0  
[1:21:26] Datapoint id 88 collected  
[1:21:26] Charge balance equation is out by -5.7%  
[1:21:26] Stirrer speed set to 60  
[1:21:31] pH 10.74 -> 10.94  
[1:21:31] Using charge balance adjust  
[1:21:31] Dispensed 0.002540 mL of Base (0.5 M KOH)  
[1:21:51] Stirrer speed set to 0  
[1:22:01] Datapoint id 89 collected  
[1:22:01] Charge balance equation is out by -13.9%  
[1:22:01] Stirrer speed set to 60  
[1:22:06] pH 10.92 -> 11.12  
[1:22:06] Using charge balance adjust  
[1:22:07] Dispensed 0.003340 mL of Base (0.5 M KOH)  
[1:22:27] Stirrer speed set to 0  
[1:22:37] Datapoint id 90 collected  
[1:22:37] Charge balance equation is out by -9.0%  
[1:22:37] Stirrer speed set to 60  
[1:22:42] pH 11.10 -> 11.30  
[1:22:42] Using charge balance adjust  
[1:22:42] Dispensed 0.004774 mL of Base (0.5 M KOH)  
[1:23:02] Stirrer speed set to 0  
[1:23:18] Datapoint id 91 collected

Sample name: **M16\_octanol**  
Assay name: **pH-metric high logP**  
Assay ID: **18C-01008**  
Filename: **C:\Sirius\_T3\Mehtap\20180228\_exp28\_logP\_T3-2\18C-01008\_M16\_octanol\_pH-metric high logP.t3r**

Experiment start time: **3/1/2018 10:41:05 AM**  
Analyst: **Pion**  
Instrument ID: **T312060**

## Experiment Log (continued)

[1:23:18] Charge balance equation is out by -23.1%  
[1:23:18] Stirrer speed set to 60  
[1:23:23] pH 11.26 -> 11.46  
[1:23:23] Using cautious pH adjust  
[1:23:24] Dispensed 0.003340 mL of Base (0.5 M KOH)  
[1:23:29] Stepping pH = 11.35  
[1:23:29] Dispensed 0.002893 mL of Base (0.5 M KOH)  
[1:23:34] Stepping pH = 11.43  
[1:23:34] Dispensed 0.001270 mL of Base (0.5 M KOH)  
[1:23:39] Stepping pH = 11.45  
[1:23:39] Dispensed 0.000447 mL of Base (0.5 M KOH)  
[1:23:45] Stepping pH = 11.46  
[1:24:00] Stirrer speed set to 0  
[1:24:10] Datapoint id 92 collected  
[1:24:10] Charge balance equation is out by -19.0%  
[1:24:10] Stirrer speed set to 60  
[1:24:15] pH 11.46 -> 11.66  
[1:24:15] Using cautious pH adjust  
[1:24:15] Dispensed 0.005174 mL of Base (0.5 M KOH)  
[1:24:20] Stepping pH = 11.56  
[1:24:20] Dispensed 0.004092 mL of Base (0.5 M KOH)  
[1:24:25] Stepping pH = 11.62  
[1:24:26] Dispensed 0.001976 mL of Base (0.5 M KOH)  
[1:24:31] Stepping pH = 11.65  
[1:24:46] Stirrer speed set to 0  
[1:24:56] Datapoint id 93 collected  
[1:24:56] Charge balance equation is out by -7.9%  
[1:24:56] Stirrer speed set to 60  
[1:25:01] pH 11.65 -> 11.85  
[1:25:01] Using charge balance adjust  
[1:25:01] Dispensed 0.016298 mL of Base (0.5 M KOH)  
[1:25:22] Stirrer speed set to 0  
[1:25:32] Datapoint id 94 collected  
[1:25:32] Charge balance equation is out by -11.2%  
[1:25:32] Stirrer speed set to 60  
[1:25:37] pH 11.84 -> 12.04  
[1:25:37] Using charge balance adjust  
[1:25:37] Dispensed 0.025329 mL of Base (0.5 M KOH)  
[1:25:58] Stirrer speed set to 0  
[1:26:08] Datapoint id 95 collected  
[1:26:08] Charge balance equation is out by -9.5%  
[1:26:08] Argon flow rate set to 0  
[1:26:12] Titrator arm moved over Titration position
