# Supplementary material for: Octanol-water partition coefficient measurements for the SAMPL6 Blind Prediction Challenge
Source: bioRxiv or medRxiv preprint supplement (doi:10.1101/757393), 2019-12-02
Supplement: Supplementary file [file media-2.zip]

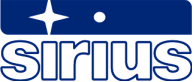

Sample name: **M08\_octanol** Experiment start time: **3/2/2018 6:51:30 PM**  
Assay name: **pH-metric high logP** Analyst: **Pion**  
Assay ID: **18C-02008** Instrument ID: **T312060**  
Filename: **C:\Sirius\_T3\Mehtap\20180302\_exp29\_logP\_T3-2\18C-02008\_M08\_octanol\_pH-metric high logP.t3r**

## pH-metric Result

logP (neutral XH) 3.08 ±0.01 (n=50)  
logP (X -) -0.07 ±0.05 (n=50)

### 18C-02008 Points 2 to 33

M08\_octanol concentration factor 1.008  
Carbonate 0.0000 mM  
Acidity error -0.21439 mM

### 18C-02008 Points 34 to 67

M08\_octanol concentration factor 1.106  
Carbonate 0.0000 mM  
Acidity error -0.33976 mM

### 18C-02008 Points 68 to 106

M08\_octanol concentration factor 0.984  
Carbonate 0.2479 mM  
Acidity error -0.08487 mM

## Warnings and errors

Errors None  
Warnings None

## Sample logD and percent species

| pH     | M08_octanol<br>logD | M08_octanol<br>M08_octanolH | M08_octanol<br>M08_octanol | M08_octanol<br>M08_octanolH* | M08_octanol<br>M08_octanol* | Comment    |
|--------|---------------------|-----------------------------|----------------------------|------------------------------|-----------------------------|------------|
| 1.000  | 3.08                | 0.08 %                      | 0.00 %                     | 99.92 %                      | 0.00 %                      | Stomach pH |
| 1.200  | 3.08                | 0.08 %                      | 0.00 %                     | 99.92 %                      | 0.00 %                      |            |
| 2.000  | 3.08                | 0.08 %                      | 0.00 %                     | 99.92 %                      | 0.00 %                      |            |
| 3.000  | 3.06                | 0.08 %                      | 0.00 %                     | 99.91 %                      | 0.00 %                      |            |
| 4.000  | 2.88                | 0.08 %                      | 0.05 %                     | 99.82 %                      | 0.04 %                      |            |
| 5.000  | 2.24                | 0.08 %                      | 0.50 %                     | 99.00 %                      | 0.42 %                      | Blood pH   |
| 6.000  | 1.31                | 0.08 %                      | 4.58 %                     | 91.44 %                      | 3.91 %                      |            |
| 6.500  | 0.85                | 0.06 %                      | 12.23 %                    | 77.26 %                      | 10.45 %                     |            |
| 7.000  | 0.45                | 0.04 %                      | 25.94 %                    | 51.84 %                      | 22.18 %                     |            |
| 7.400  | 0.22                | 0.02 %                      | 37.72 %                    | 30.01 %                      | 32.25 %                     |            |
| 8.000  | 0.02                | 0.01 %                      | 48.66 %                    | 9.72 %                       | 41.61 %                     |            |
| 9.000  | -0.06               | 0.00 %                      | 53.33 %                    | 1.07 %                       | 45.60 %                     |            |
| 10.000 | -0.07               | 0.00 %                      | 53.85 %                    | 0.11 %                       | 46.04 %                     |            |
| 11.000 | -0.07               | 0.00 %                      | 53.90 %                    | 0.01 %                       | 46.09 %                     |            |
| 12.000 | -0.07               | 0.00 %                      | 53.91 %                    | 0.00 %                       | 46.09 %                     |            |

Sample name: **M08\_octanol**  
 Assay name: **pH-metric high logP**  
 Assay ID: **18C-02008**  
 Filename: **C:\Sirius\_T3\Mehtap\20180302\_exp29\_logP\_T3-2\18C-02008\_M08\_octanol\_pH-metric high logP.t3r**

Experiment start time: **3/2/2018 6:51:30 PM**  
 Analyst: **Pion**  
 Instrument ID: **T312060**

## Graphs

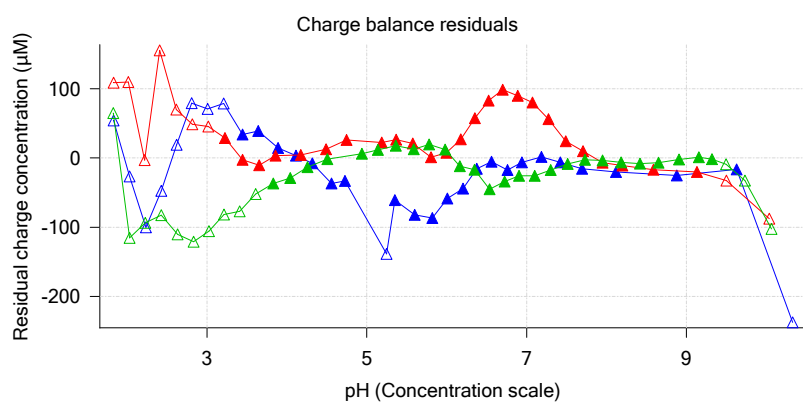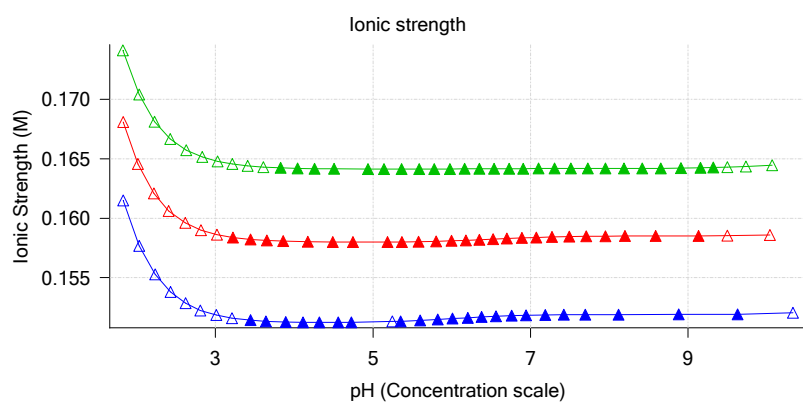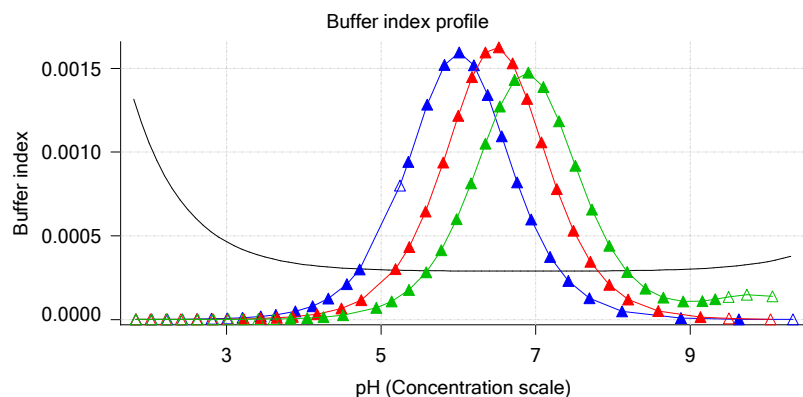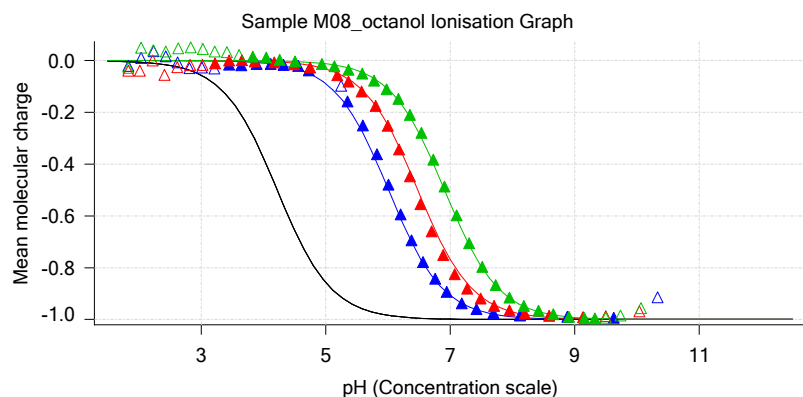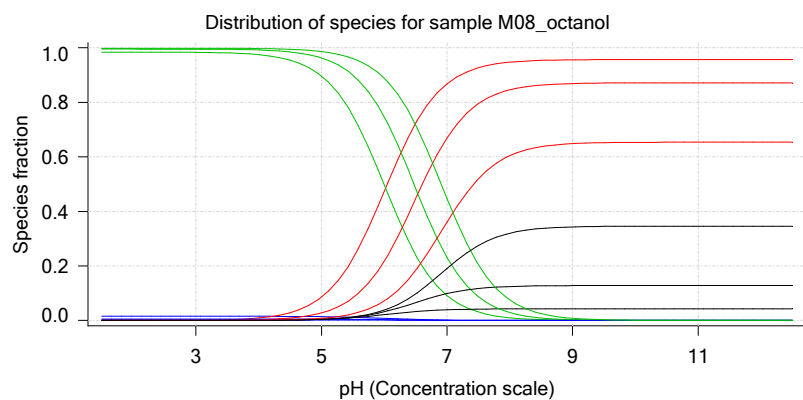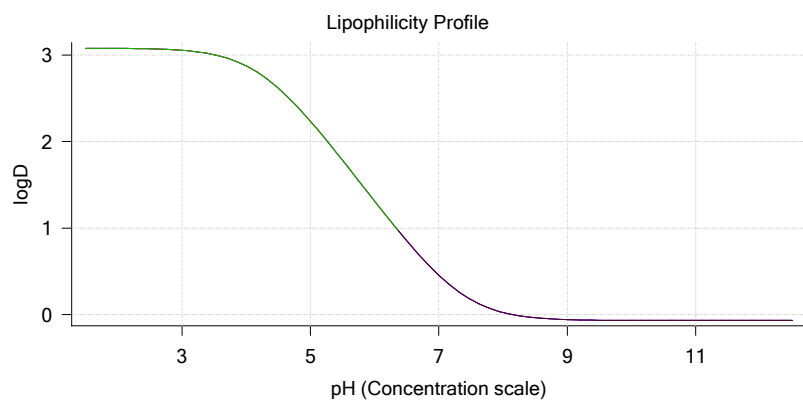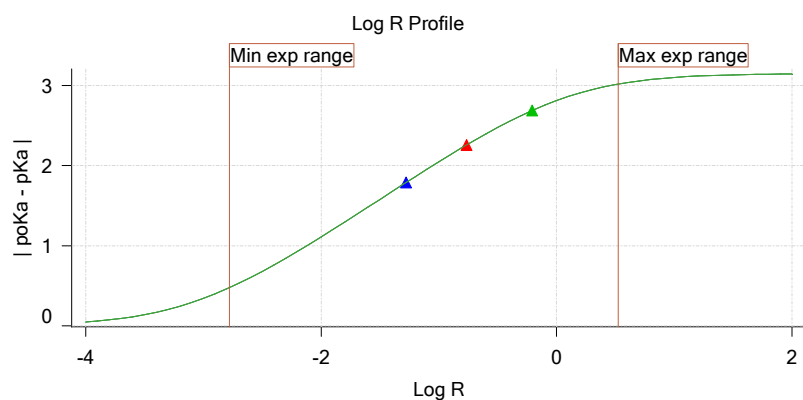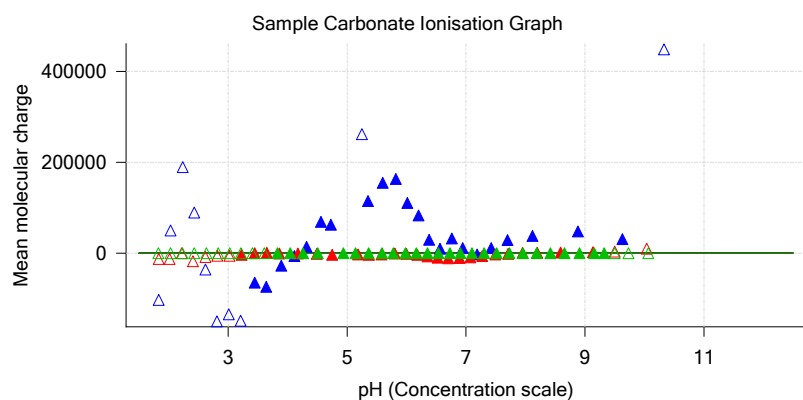

Sample name: **M08\_octanol**  
 Assay name: **pH-metric high logP**  
 Assay ID: **18C-02008**  
 Filename: **C:\Sirius\_T3\Mehtap\20180302\_exp29\_logP\_T3-2\18C-02008\_M08\_octanol\_pH-metric high logP.t3r**

Experiment start time: **3/2/2018 6:51:30 PM**  
 Analyst: **Pion**  
 Instrument ID: **T312060**

## Graphs (continued)

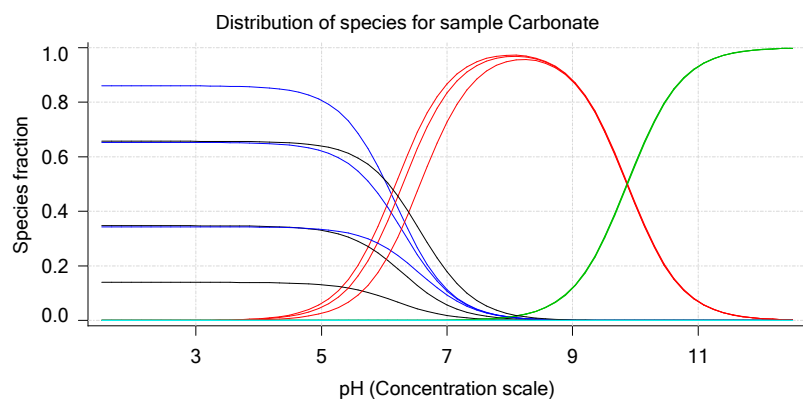

Sample name: **M08\_octanol**  
 Assay name: **pH-metric high logP**  
 Assay ID: **18C-02008**  
 Filename: **C:\Sirius\_T3\Mehtap\20180302\_exp29\_logP\_T3-2\18C-02008\_M08\_octanol\_pH-metric high logP.t3r**

Experiment start time: **3/2/2018 6:51:30 PM**  
 Analyst: **Pion**  
 Instrument ID: **T312060**

## pH-metric high logP Titration 1 of 3 18C-02008 Points 2 to 33

### Overall results

RMSD 0.161  
 Average ionic strength 0.152 M  
 Average temperature 24.9°C  
 Partition ratio 0.0526 : 1  
 Analyte concentration range 2531.4 µM to 2619.0 µM  
 Total points considered 22 of 32

### Warnings and errors

Errors None  
 Warnings One or more logP values out of range

### Four-Plus parameters

Alpha 0.111 3/2/2018 6:51:30 PM C:\Sirius\_T3\HCl18C02.t3r  
 S 0.9988 3/2/2018 6:51:30 PM C:\Sirius\_T3\HCl18C02.t3r  
 jH 1.0 3/2/2018 6:51:30 PM C:\Sirius\_T3\HCl18C02.t3r  
 jOH -0.8 3/2/2018 6:51:30 PM C:\Sirius\_T3\HCl18C02.t3r

### Titrants

0.50 M HCl 0.999058 3/2/2018 6:51:30 PM C:\Sirius\_T3\HCl18C02.t3r  
 0.50 M KOH 0.999845 3/2/2018 6:51:30 PM C:\Sirius\_T3\KOH18B27.t3r

### Sample

M08\_octanol concentration factor 1.008  
 Acid pKa 1 4.22  
 logP (neutral XH) 3.10  
 logP (X-) -5.13

### Sample graphs

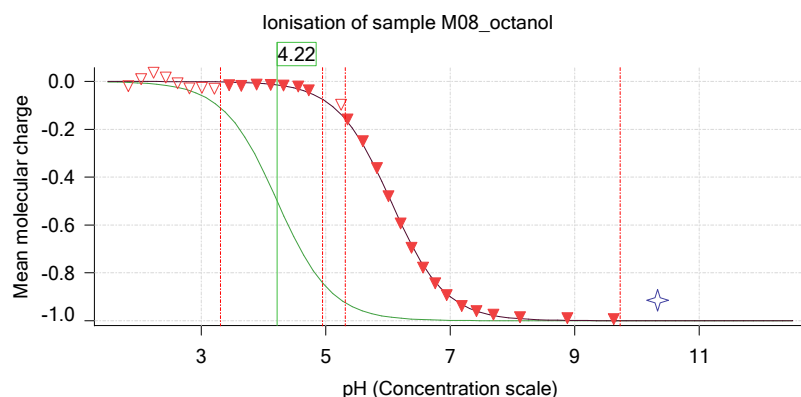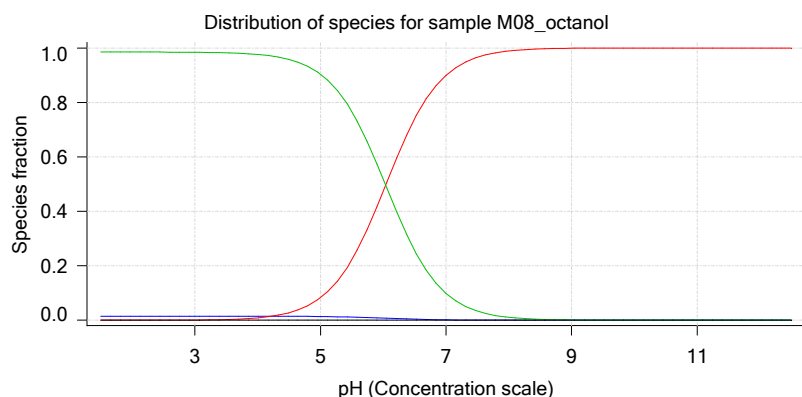

Sample name: **M08\_octanol**  
 Assay name: **pH-metric high logP**  
 Assay ID: **18C-02008**  
 Filename: **C:\Sirius\_T3\Mehtap\20180302\_exp29\_logP\_T3-2\18C-02008\_M08\_octanol\_pH-metric high logP.t3r**

Experiment start time: **3/2/2018 6:51:30 PM**  
 Analyst: **Pion**  
 Instrument ID: **T312060**

## Sample graphs (continued)

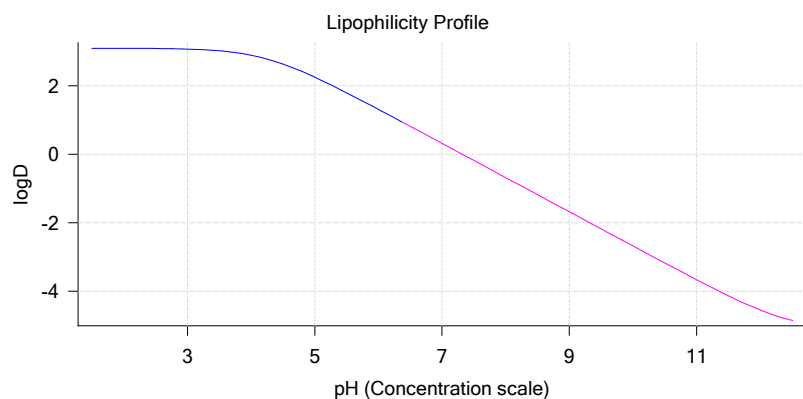

## Sample logD and percent species

| pH     | M08_octanol<br>logD | M08_octanol<br>M08_octanolH | M08_octanol<br>M08_octanolH | M08_octanol<br>M08_octanolH* | M08_octanol<br>M08_octanol* | Comment    |
|--------|---------------------|-----------------------------|-----------------------------|------------------------------|-----------------------------|------------|
| 1.000  | 3.10                | 1.49 %                      | 0.00 %                      | 98.50 %                      | 0.00 %                      | Stomach pH |
| 1.200  | 3.10                | 1.49 %                      | 0.00 %                      | 98.50 %                      | 0.00 %                      |            |
| 2.000  | 3.10                | 1.49 %                      | 0.01 %                      | 98.50 %                      | 0.00 %                      |            |
| 3.000  | 3.07                | 1.49 %                      | 0.09 %                      | 98.42 %                      | 0.00 %                      |            |
| 4.000  | 2.89                | 1.48 %                      | 0.89 %                      | 97.63 %                      | 0.00 %                      |            |
| 5.000  | 2.25                | 1.37 %                      | 8.26 %                      | 90.37 %                      | 0.00 %                      | Blood pH   |
| 6.000  | 1.31                | 0.79 %                      | 47.38 %                     | 51.83 %                      | 0.00 %                      |            |
| 6.500  | 0.82                | 0.39 %                      | 74.01 %                     | 25.60 %                      | 0.00 %                      |            |
| 7.000  | 0.32                | 0.15 %                      | 90.01 %                     | 9.84 %                       | 0.00 %                      |            |
| 7.400  | -0.08               | 0.06 %                      | 95.77 %                     | 4.17 %                       | 0.00 %                      |            |
| 8.000  | -0.68               | 0.02 %                      | 98.90 %                     | 1.08 %                       | 0.00 %                      |            |
| 9.000  | -1.68               | 0.00 %                      | 99.89 %                     | 0.11 %                       | 0.00 %                      |            |
| 10.000 | -2.68               | 0.00 %                      | 99.99 %                     | 0.01 %                       | 0.00 %                      |            |
| 11.000 | -3.67               | 0.00 %                      | 100.00 %                    | 0.00 %                       | 0.00 %                      |            |
| 12.000 | -4.55               | 0.00 %                      | 100.00 %                    | 0.00 %                       | 0.00 %                      |            |

## Carbonate and acidity

 Carbonate 0.000 mM  
 Acidity error -0.214 mM

## Other graphs

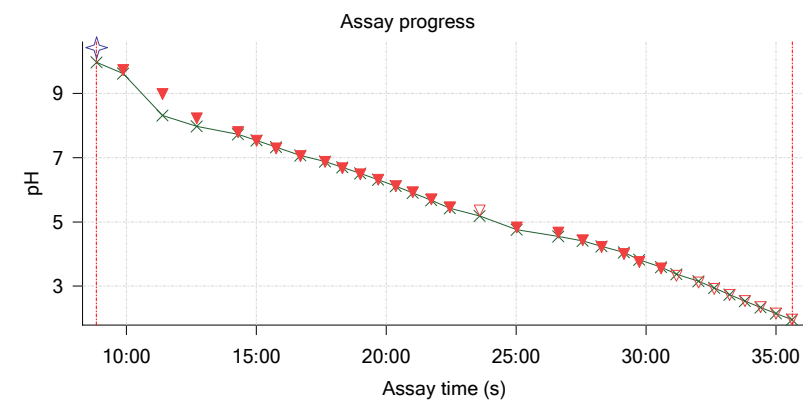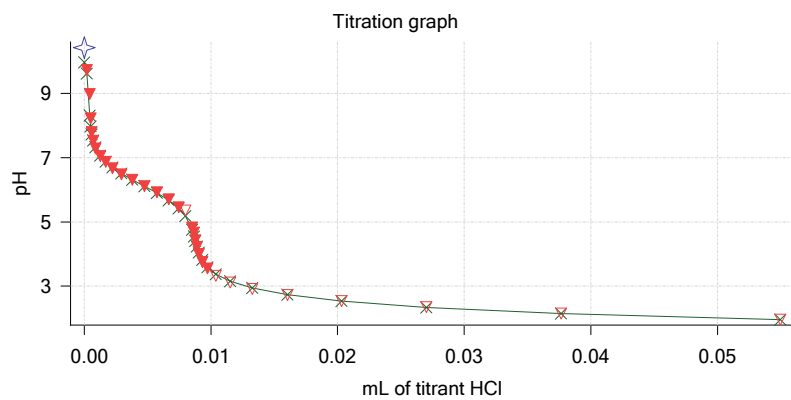

Sample name: **M08\_octanol**  
 Assay name: **pH-metric high logP**  
 Assay ID: **18C-02008**  
 Filename: **C:\Sirius\_T3\Mehtap\20180302\_exp29\_logP\_T3-2\18C-02008\_M08\_octanol\_pH-metric high logP.t3r**

Experiment start time: **3/2/2018 6:51:30 PM**  
 Analyst: **Pion**  
 Instrument ID: **T312060**

## Other graphs (continued)

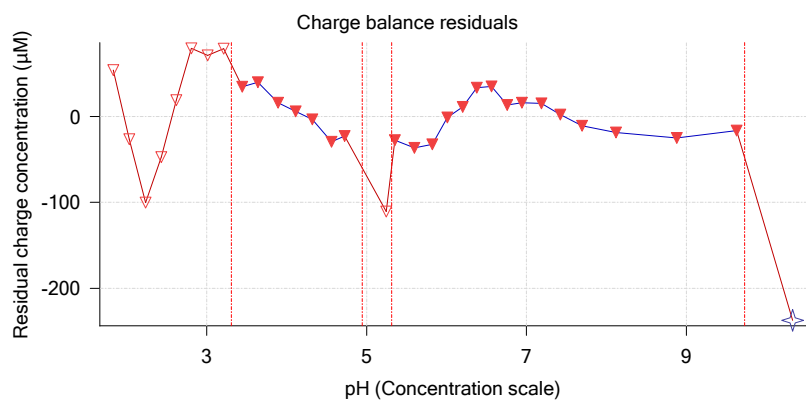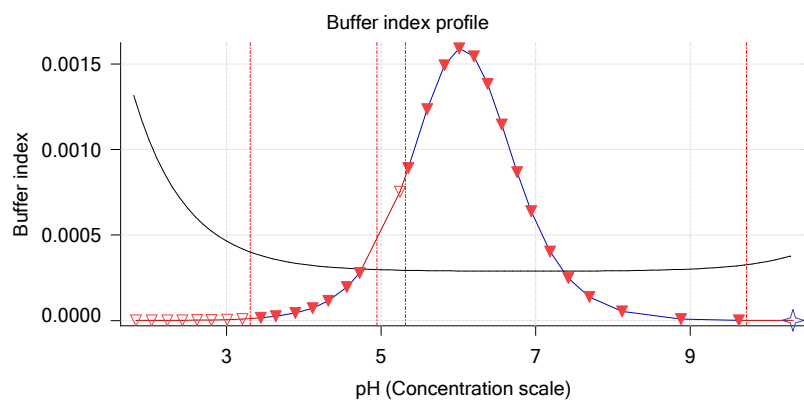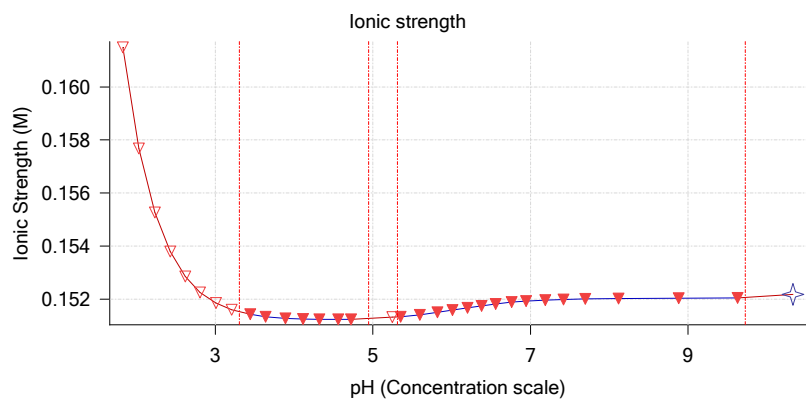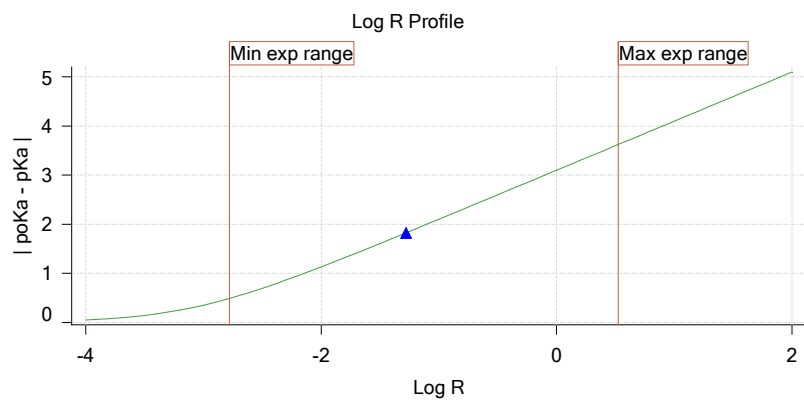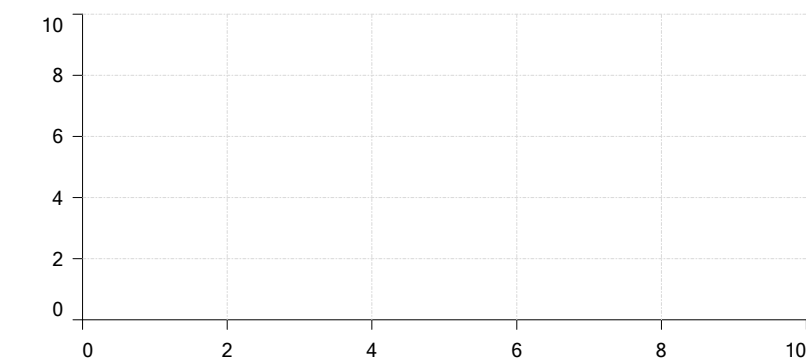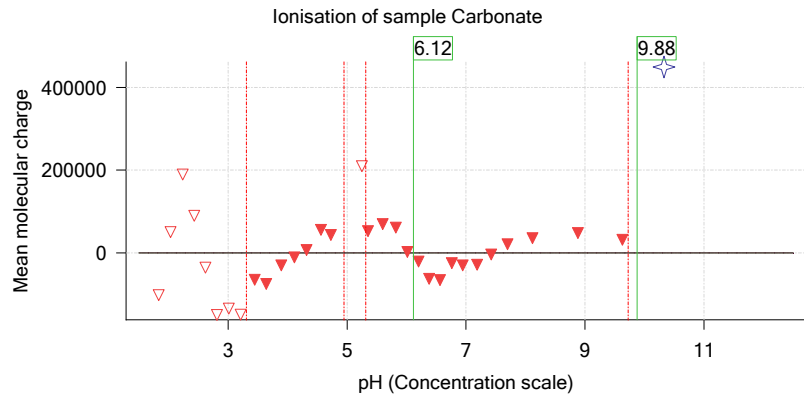

Sample name: **M08\_octanol**  
 Assay name: **pH-metric high logP**  
 Assay ID: **18C-02008**  
 Filename: **C:\Sirius\_T3\Mehtap\20180302\_exp29\_logP\_T3-2\18C-02008\_M08\_octanol\_pH-metric high logP.t3r**

Experiment start time: **3/2/2018 6:51:30 PM**  
 Analyst: **Pion**  
 Instrument ID: **T312060**

pH-metric high logP Titration 2 of 3 18C-02008 Points 34 to 67

## Overall results

RMSD 0.101  
 Average ionic strength 0.158 M  
 Average temperature 25.0°C  
 Partition ratio 0.1721 : 1  
 Analyte concentration range 2125.1 µM to 2191.1 µM  
 Total points considered 25 of 34

## Warnings and errors

Errors None  
 Warnings One or more logP values out of range

## Four-Plus parameters

Alpha 0.111 3/2/2018 6:51:30 PM C:\Sirius\_T3\HCl18C02.t3r  
 S 0.9988 3/2/2018 6:51:30 PM C:\Sirius\_T3\HCl18C02.t3r  
 jH 1.0 3/2/2018 6:51:30 PM C:\Sirius\_T3\HCl18C02.t3r  
 jOH -0.8 3/2/2018 6:51:30 PM C:\Sirius\_T3\HCl18C02.t3r

## Titrants

0.50 M HCl 0.999058 3/2/2018 6:51:30 PM C:\Sirius\_T3\HCl18C02.t3r  
 0.50 M KOH 0.999845 3/2/2018 6:51:30 PM C:\Sirius\_T3\KOH18B27.t3r

## Sample

M08\_octanol concentration factor 1.106  
 Acid pKa 1 4.22  
 logP (neutral XH) 2.98  
 logP (X-) -4.72

## Sample graphs

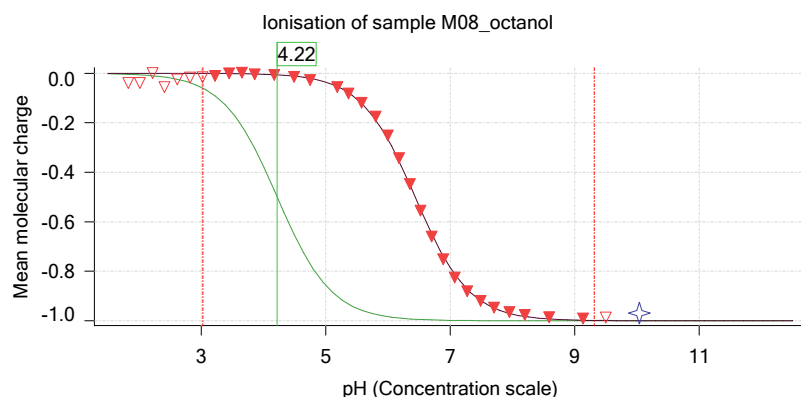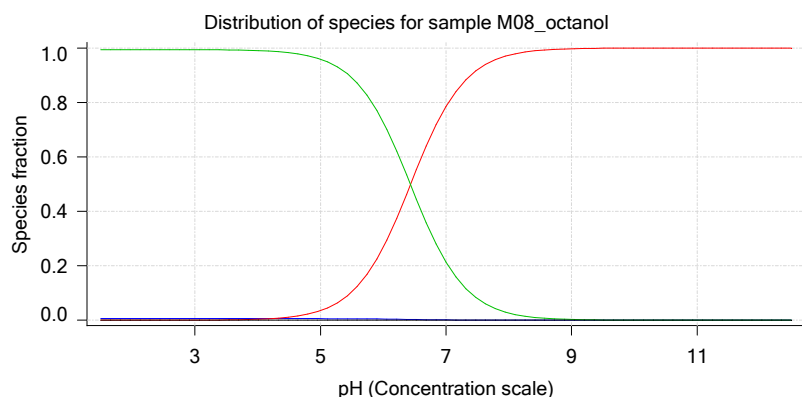

Sample name: **M08\_octanol**  
 Assay name: **pH-metric high logP**  
 Assay ID: **18C-02008**  
 Filename: **C:\Sirius\_T3\Mehtap\20180302\_exp29\_logP\_T3-2\18C-02008\_M08\_octanol\_pH-metric high logP.t3r**

Experiment start time: **3/2/2018 6:51:30 PM**  
 Analyst: **Pion**  
 Instrument ID: **T312060**

## Sample graphs (continued)

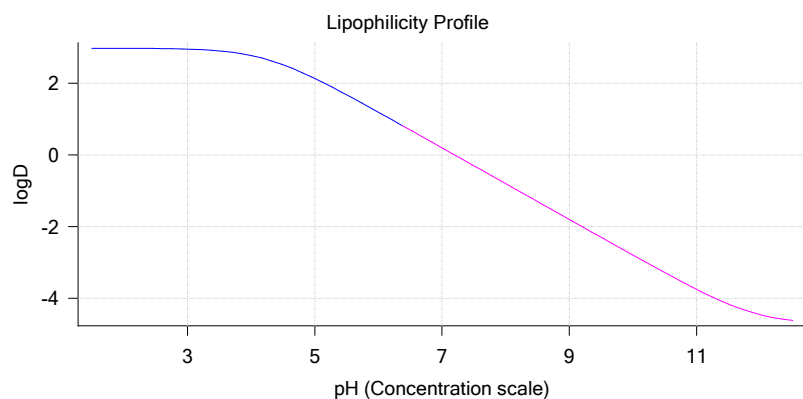

## Sample logD and percent species

| pH     | M08_octanol<br>logD | M08_octanol<br>M08_octanolH | M08_octanol<br>M08_octanolH | M08_octanol<br>M08_octanolH* | M08_octanol<br>M08_octanol* | Comment |
|--------|---------------------|-----------------------------|-----------------------------|------------------------------|-----------------------------|---------|
| 1.000  | 2.98                | 0.61 %                      | 0.00 %                      | 99.39 %                      | 0.00 %                      |         |
| 1.200  | 2.98                | 0.61 %                      | 0.00 %                      | 99.39 %                      | 0.00 %                      |         |
| 2.000  | 2.98                | 0.61 %                      | 0.00 %                      | 99.39 %                      | 0.00 %                      |         |
| 3.000  | 2.95                | 0.61 %                      | 0.04 %                      | 99.36 %                      | 0.00 %                      |         |
| 4.000  | 2.77                | 0.61 %                      | 0.36 %                      | 99.03 %                      | 0.00 %                      |         |
| 5.000  | 2.13                | 0.59 %                      | 3.53 %                      | 95.88 %                      | 0.00 %                      |         |
| 6.000  | 1.19                | 0.44 %                      | 26.80 %                     | 72.76 %                      | 0.00 %                      |         |
| 6.500  | 0.70                | 0.28 %                      | 53.65 %                     | 46.06 %                      | 0.00 %                      |         |
| 7.000  | 0.20                | 0.13 %                      | 78.54 %                     | 21.32 %                      | 0.00 %                      |         |
| 7.400  | -0.20               | 0.06 %                      | 90.19 %                     | 9.75 %                       | 0.00 %                      |         |
| 8.000  | -0.80               | 0.02 %                      | 97.34 %                     | 2.64 %                       | 0.00 %                      |         |
| 9.000  | -1.80               | 0.00 %                      | 99.73 %                     | 0.27 %                       | 0.00 %                      |         |
| 10.000 | -2.80               | 0.00 %                      | 99.97 %                     | 0.03 %                       | 0.00 %                      |         |
| 11.000 | -3.75               | 0.00 %                      | 100.00 %                    | 0.00 %                       | 0.00 %                      |         |
| 12.000 | -4.46               | 0.00 %                      | 100.00 %                    | 0.00 %                       | 0.00 %                      |         |

## Carbonate and acidity

Carbonate 0.000 mM  
 Acidity error -0.340 mM

## Other graphs

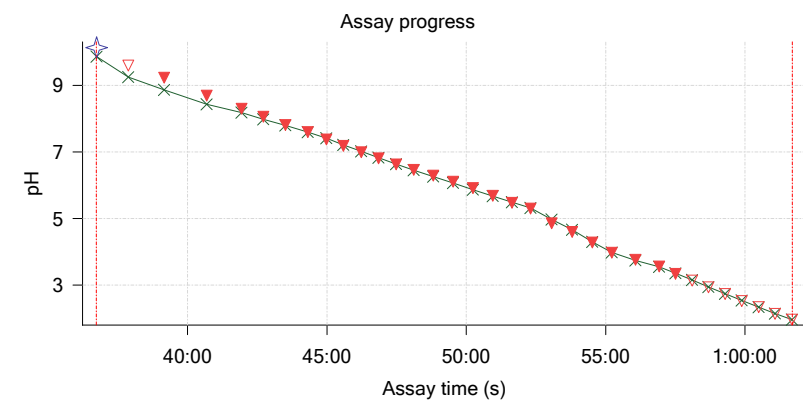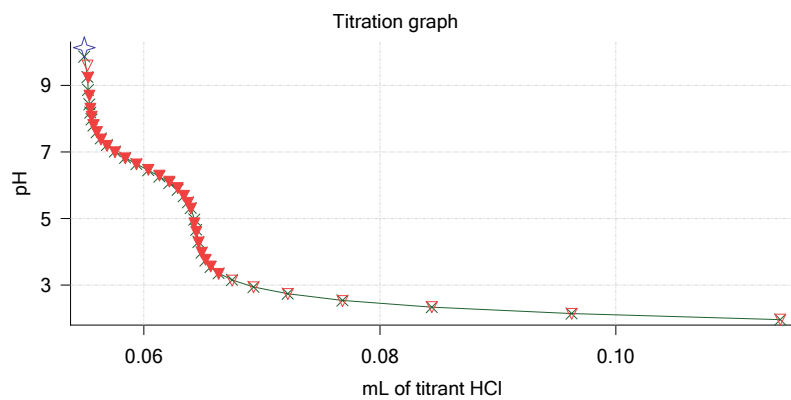



Sample name: **M08\_octanol**  
 Assay name: **pH-metric high logP**  
 Assay ID: **18C-02008**  
 Filename: **C:\Sirius\_T3\Mehtap\20180302\_exp29\_logP\_T3-2\18C-02008\_M08\_octanol\_pH-metric high logP.t3r**

Experiment start time: **3/2/2018 6:51:30 PM**  
 Analyst: **Pion**  
 Instrument ID: **T312060**

## Other graphs (continued)

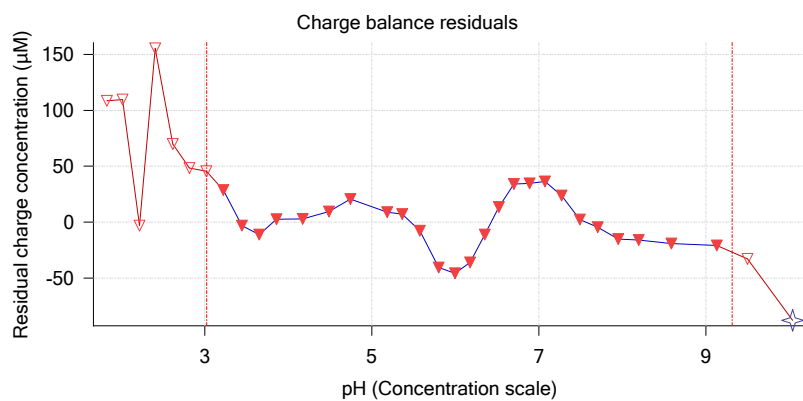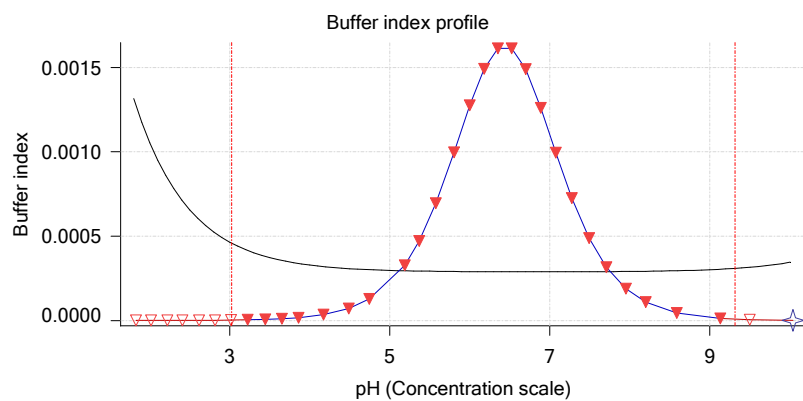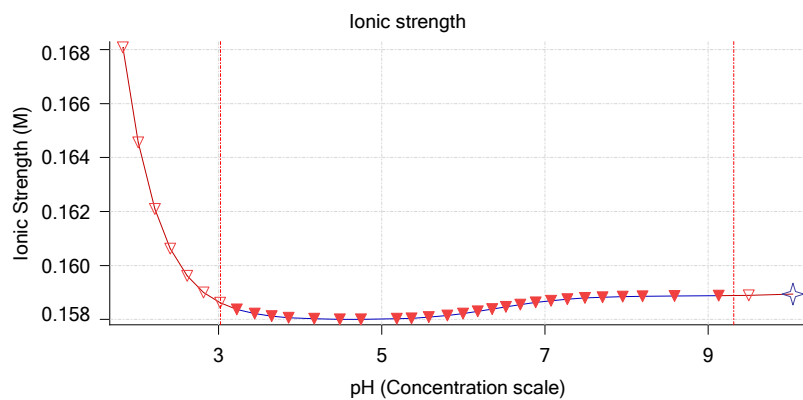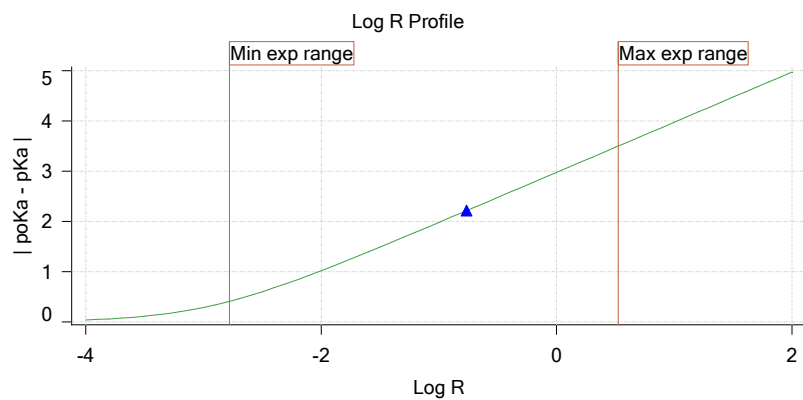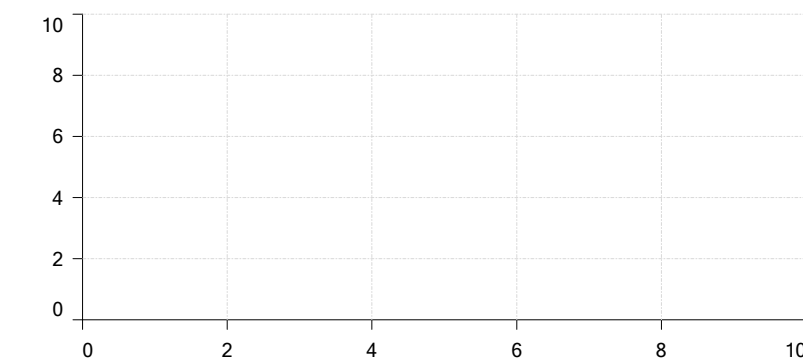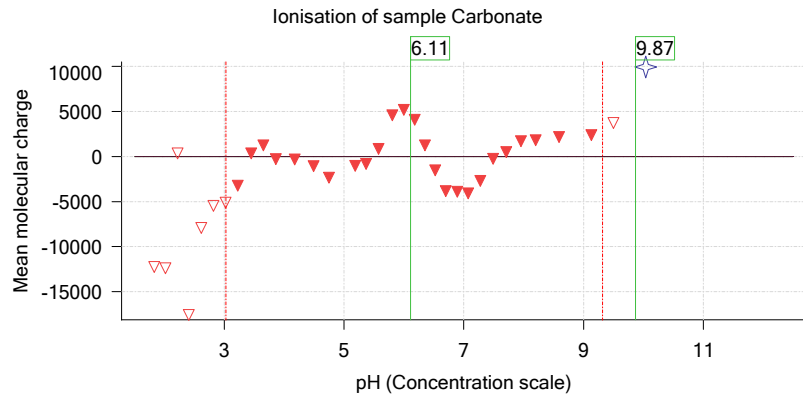

Sample name: **M08\_octanol**  
 Assay name: **pH-metric high logP**  
 Assay ID: **18C-02008**  
 Filename: **C:\Sirius\_T3\Mehtap\20180302\_exp29\_logP\_T3-2\18C-02008\_M08\_octanol\_pH-metric high logP.t3r**

Experiment start time: **3/2/2018 6:51:30 PM**  
 Analyst: **Pion**  
 Instrument ID: **T312060**

pH-metric high logP Titration 3 of 3 18C-02008 Points 68 to 106

## Overall results

RMSD 0.055  
 Average ionic strength 0.165 M  
 Average temperature 25.0°C  
 Partition ratio 0.6191 : 1  
 Analyte concentration range 1443.8 µM to 1476.3 µM  
 Total points considered 26 of 39

## Warnings and errors

Errors None  
 Warnings One or more logP values out of range

## Four-Plus parameters

Alpha 0.111 3/2/2018 6:51:30 PM C:\Sirius\_T3\HCl18C02.t3r  
 S 0.9988 3/2/2018 6:51:30 PM C:\Sirius\_T3\HCl18C02.t3r  
 jH 1.0 3/2/2018 6:51:30 PM C:\Sirius\_T3\HCl18C02.t3r  
 jOH -0.8 3/2/2018 6:51:30 PM C:\Sirius\_T3\HCl18C02.t3r

## Titrants

0.50 M HCl 0.999058 3/2/2018 6:51:30 PM C:\Sirius\_T3\HCl18C02.t3r  
 0.50 M KOH 0.999845 3/2/2018 6:51:30 PM C:\Sirius\_T3\KOH18B27.t3r

## Sample

M08\_octanol concentration factor 0.984  
 Acid pKa 1 4.22  
 logP (neutral XH) 2.91  
 logP (X-) -5.22

## Sample graphs

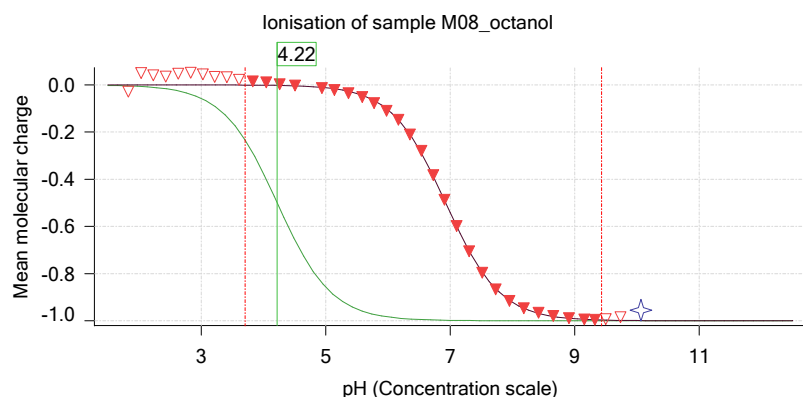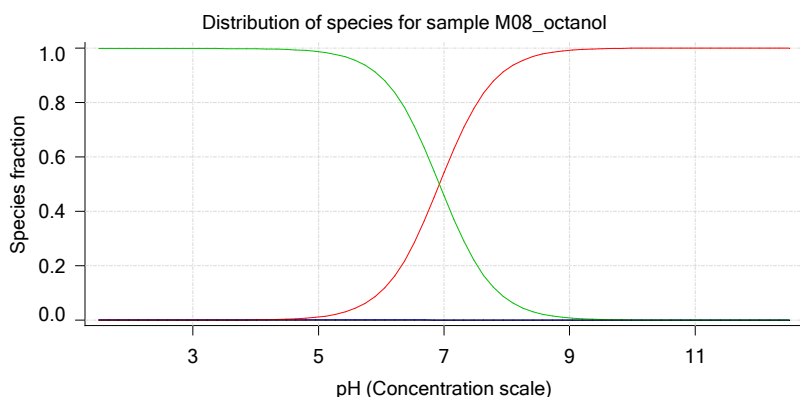

Sample name: **M08\_octanol**  
 Assay name: **pH-metric high logP**  
 Assay ID: **18C-02008**  
 Filename: **C:\Sirius\_T3\Mehtap\20180302\_exp29\_logP\_T3-2\18C-02008\_M08\_octanol\_pH-metric high logP.t3r**

Experiment start time: **3/2/2018 6:51:30 PM**  
 Analyst: **Pion**  
 Instrument ID: **T312060**

## Sample graphs (continued)

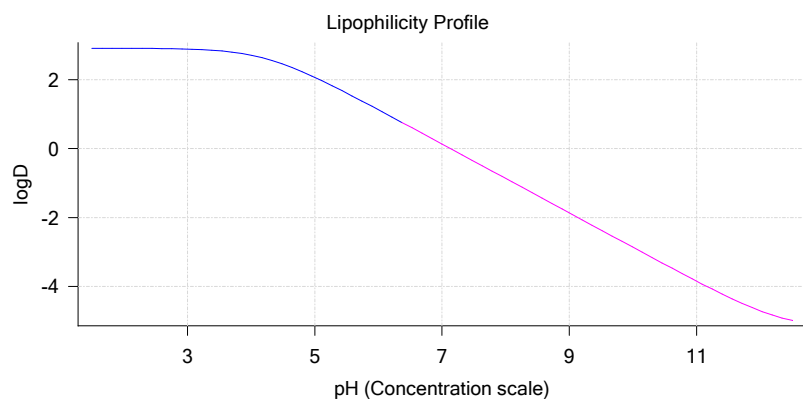

## Sample logD and percent species

| pH     | M08_octanol<br>logD | M08_octanol<br>M08_octanolH | M08_octanol<br>M08_octanolH | M08_octanol<br>M08_octanolH* | M08_octanol<br>M08_octanol* | Comment    |
|--------|---------------------|-----------------------------|-----------------------------|------------------------------|-----------------------------|------------|
| 1.000  | 2.91                | 0.20 %                      | 0.00 %                      | 99.80 %                      | 0.00 %                      | Stomach pH |
| 1.200  | 2.91                | 0.20 %                      | 0.00 %                      | 99.80 %                      | 0.00 %                      |            |
| 2.000  | 2.91                | 0.20 %                      | 0.00 %                      | 99.80 %                      | 0.00 %                      |            |
| 3.000  | 2.89                | 0.20 %                      | 0.01 %                      | 99.79 %                      | 0.00 %                      |            |
| 4.000  | 2.71                | 0.20 %                      | 0.12 %                      | 99.69 %                      | 0.00 %                      |            |
| 5.000  | 2.07                | 0.19 %                      | 1.17 %                      | 98.64 %                      | 0.00 %                      | Blood pH   |
| 6.000  | 1.13                | 0.18 %                      | 10.57 %                     | 89.25 %                      | 0.00 %                      |            |
| 6.500  | 0.63                | 0.14 %                      | 27.22 %                     | 72.64 %                      | 0.00 %                      |            |
| 7.000  | 0.13                | 0.09 %                      | 54.18 %                     | 45.73 %                      | 0.00 %                      |            |
| 7.400  | -0.27               | 0.05 %                      | 74.81 %                     | 25.14 %                      | 0.00 %                      |            |
| 8.000  | -0.87               | 0.02 %                      | 92.20 %                     | 7.78 %                       | 0.00 %                      |            |
| 9.000  | -1.87               | 0.00 %                      | 99.16 %                     | 0.84 %                       | 0.00 %                      |            |
| 10.000 | -2.86               | 0.00 %                      | 99.92 %                     | 0.08 %                       | 0.00 %                      |            |
| 11.000 | -3.85               | 0.00 %                      | 99.99 %                     | 0.01 %                       | 0.00 %                      |            |
| 12.000 | -4.71               | 0.00 %                      | 100.00 %                    | 0.00 %                       | 0.00 %                      |            |

## Carbonate and acidity

Carbonate 0.248 mM  
 Acidity error -0.085 mM

## Other graphs

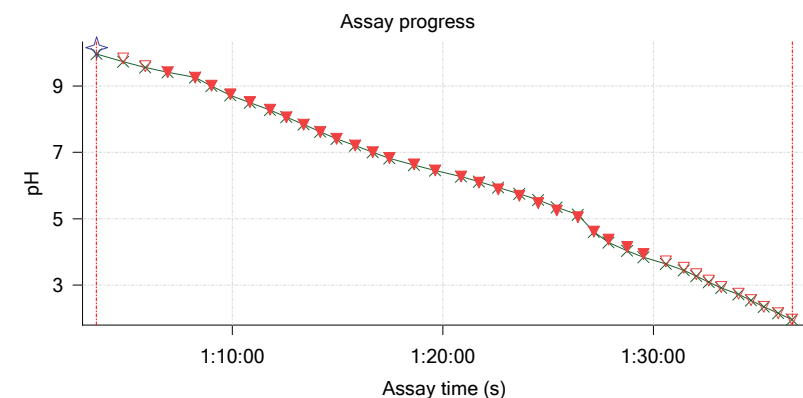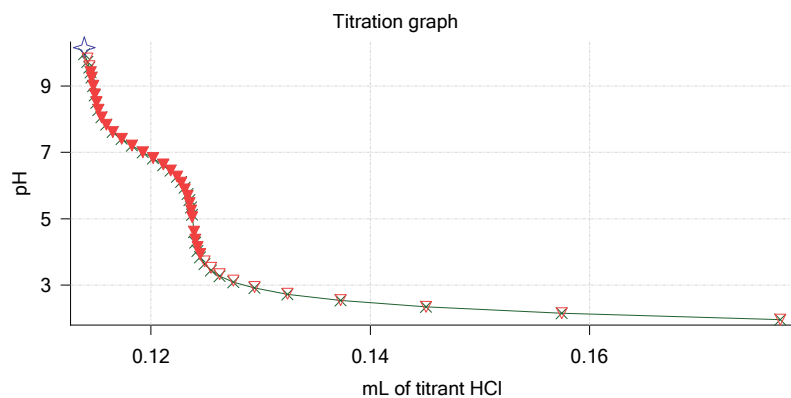

Sample name: **M08\_octanol**  
 Assay name: **pH-metric high logP**  
 Assay ID: **18C-02008**  
 Filename: **C:\Sirius\_T3\Mehtap\20180302\_exp29\_logP\_T3-2\18C-02008\_M08\_octanol\_pH-metric high logP.t3r**

Experiment start time: **3/2/2018 6:51:30 PM**  
 Analyst: **Pion**  
 Instrument ID: **T312060**

## Other graphs (continued)

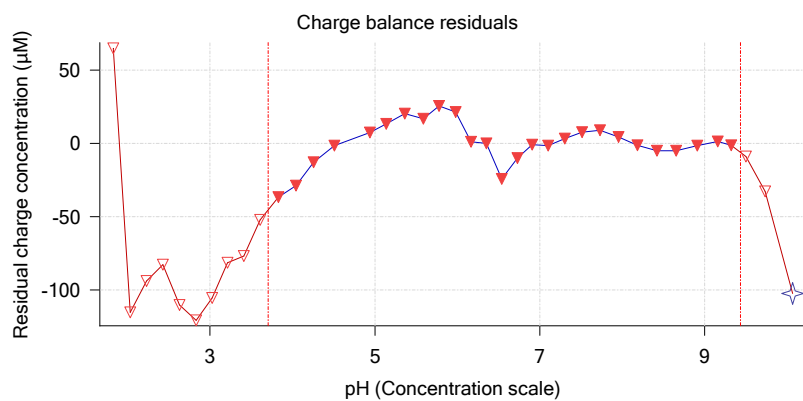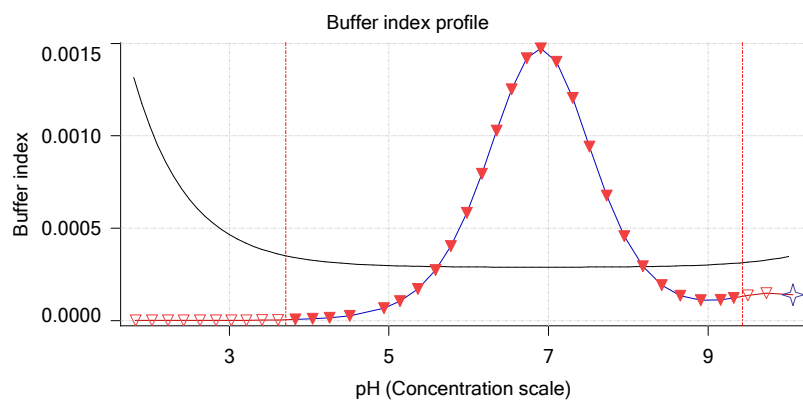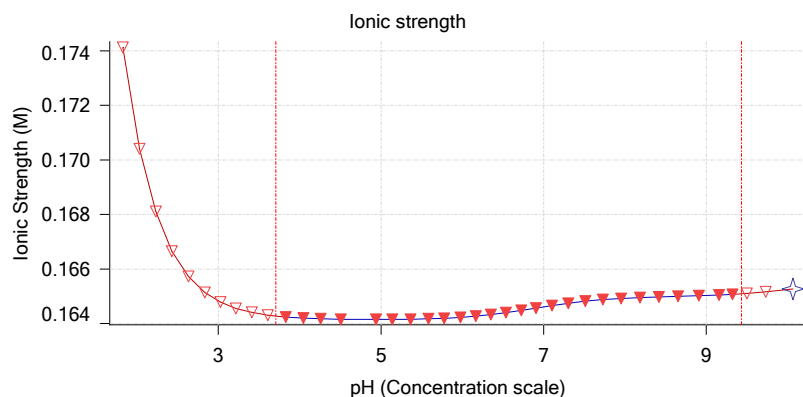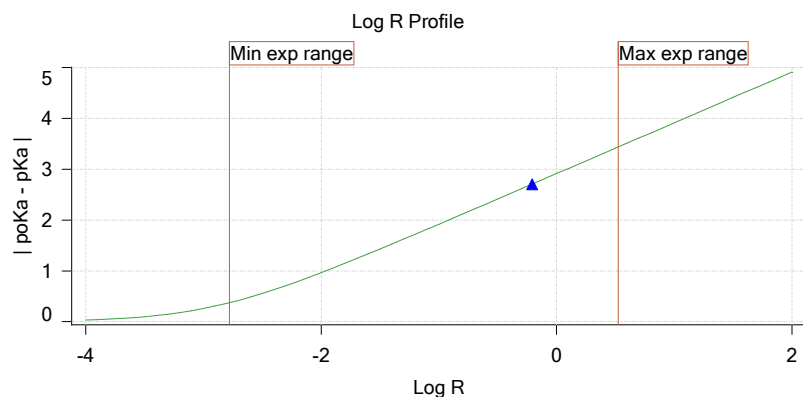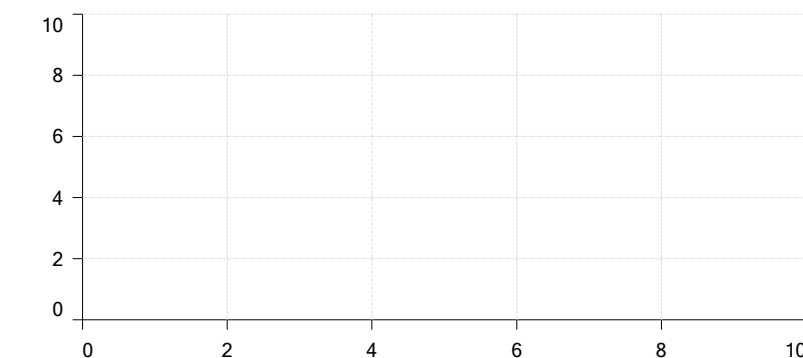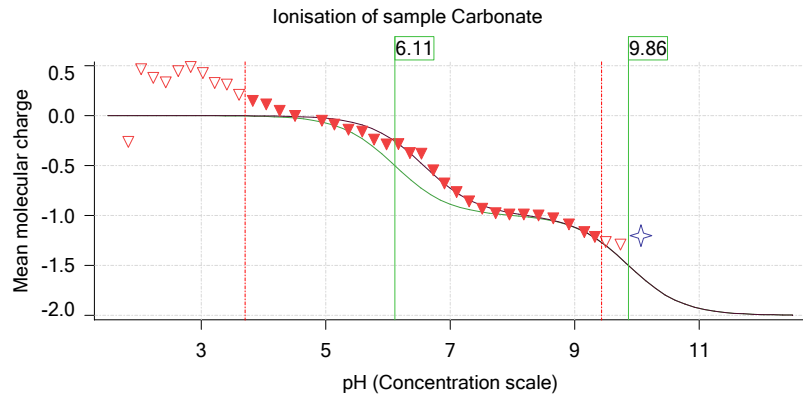

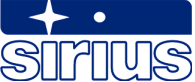

## Assay model

Sample name: **M08\_octanol** Experiment start time: **3/2/2018 6:51:30 PM**  
Assay name: **pH-metric high logP** Analyst: **Pion**  
Assay ID: **18C-02008** Instrument ID: **T312060**  
Filename: **C:\Sirius\_T3\Mehtap\20180302\_exp29\_logP\_T3-2\18C-02008\_M08\_octanol\_pH-metric high logP.t3r**

## Assay Model

| Settings                          | Value        | Date/Time changed    | Imported from      |
|-----------------------------------|--------------|----------------------|--------------------|
| Sample name                       | M08_octanol  | 2/27/2018 4:33:51 PM | User entered value |
| Sample by                         | Weight       |                      | Default value      |
| Sample weight                     | 0.001220 g   | 3/2/2018 5:08:15 PM  | User entered value |
| Formula weight                    | 293.32 g/mol | 2/27/2018 4:33:51 PM | User entered value |
| Solubility                        | Unknown      |                      | Default value      |
| Molecular weight                  | 293.32       | 2/27/2018 4:33:51 PM | User entered value |
| Individual pKa ionic environments | No           |                      | Default value      |
| Number of pKas                    | 1            | 2/27/2018 4:33:51 PM | User entered value |
| Sample is a                       | Acid         | 2/27/2018 4:33:51 PM | User entered value |
| pKa 1                             | 4.22         | 2/27/2018 4:33:51 PM | User entered value |
| logP (neutral XH)                 | 2.98         | 3/2/2018 3:22:58 PM  | User entered value |
| logP (X -)                        | -5.22        | 3/2/2018 3:23:03 PM  | User entered value |

## Events

| Time    | Event                  | Water      | Acid       | Base       | Octanol    | pH     | dpH/dt   | pH R-squared | pH SD   | dpH time           |
|---------|------------------------|------------|------------|------------|------------|--------|----------|--------------|---------|--------------------|
| 5:58.6  | Manual volume addition |            |            |            | 0.08000 mL |        |          |              |         |                    |
| 5:59.7  | Initial pH = 5.21      |            |            |            |            |        |          |              |         |                    |
| 8:51.7  | Data point 2           | 1.50000 mL | 0.00000 mL | 0.00811 mL | 0.08000 mL | 10.428 | 0.01958  | 0.93900      | 0.00100 | 34.0 s             |
| 9:52.4  | Data point 3           | 1.50000 mL | 0.00021 mL | 0.00811 mL | 0.08000 mL | 9.727  | 0.01586  | 0.62733      | 0.00099 | 55.5 s             |
| 11:23.7 | Data point 4           | 1.50000 mL | 0.00042 mL | 0.00811 mL | 0.08000 mL | 8.981  | -0.01653 | 0.82499      | 0.00090 | 43.0 s             |
| 12:42.4 | Data point 5           | 1.50000 mL | 0.00049 mL | 0.00811 mL | 0.08000 mL | 8.220  | -0.04412 | 0.98170      | 0.00220 | Time out at 12.5 s |
| 14:17.9 | Data point 6           | 1.50000 mL | 0.00059 mL | 0.00811 mL | 0.08000 mL | 7.798  | 0.01512  | 0.58186      | 0.00098 | 12.5 s             |
| 15:00.9 | Data point 7           | 1.50000 mL | 0.00071 mL | 0.00811 mL | 0.08000 mL | 7.523  | 0.01618  | 0.67470      | 0.00097 | 14.5 s             |
| 15:46.0 | Data point 8           | 1.50000 mL | 0.00089 mL | 0.00811 mL | 0.08000 mL | 7.289  | 0.01805  | 0.80919      | 0.00099 | 15.0 s             |
| 16:41.8 | Data point 9           | 1.50000 mL | 0.00127 mL | 0.00811 mL | 0.08000 mL | 7.046  | 0.01754  | 0.75358      | 0.00100 | 16.0 s             |
| 17:38.7 | Data point 10          | 1.50000 mL | 0.00169 mL | 0.00811 mL | 0.08000 mL | 6.863  | 0.01849  | 0.84615      | 0.00099 | 14.5 s             |
| 18:18.6 | Data point 11          | 1.50000 mL | 0.00223 mL | 0.00811 mL | 0.08000 mL | 6.664  | 0.01638  | 0.78161      | 0.00092 | 16.0 s             |
| 18:59.9 | Data point 12          | 1.50000 mL | 0.00294 mL | 0.00811 mL | 0.08000 mL | 6.481  | 0.01849  | 0.86308      | 0.00098 | 16.5 s             |
| 19:41.9 | Data point 13          | 1.50000 mL | 0.00379 mL | 0.00811 mL | 0.08000 mL | 6.307  | 0.01848  | 0.90886      | 0.00096 | 15.0 s             |
| 20:22.3 | Data point 14          | 1.50000 mL | 0.00475 mL | 0.00811 mL | 0.08000 mL | 6.113  | 0.01882  | 0.90673      | 0.00098 | 14.0 s             |
| 21:01.8 | Data point 15          | 1.50000 mL | 0.00574 mL | 0.00811 mL | 0.08000 mL | 5.924  | 0.01677  | 0.83278      | 0.00091 | 17.0 s             |
| 21:44.2 | Data point 16          | 1.50000 mL | 0.00668 mL | 0.00811 mL | 0.08000 mL | 5.702  | 0.01845  | 0.92173      | 0.00095 | 17.5 s             |
| 22:27.2 | Data point 17          | 1.50000 mL | 0.00746 mL | 0.00811 mL | 0.08000 mL | 5.455  | 0.01862  | 0.94817      | 0.00094 | 28.0 s             |
| 23:36.2 | Data point 18          | 1.50000 mL | 0.00797 mL | 0.00811 mL | 0.08000 mL | 5.350  | 0.09983  | 0.99423      | 0.00495 | Time out at 17.0 s |
| 25:01.6 | Data point 19          | 1.50000 mL | 0.00851 mL | 0.00811 mL | 0.08000 mL | 4.830  | 0.04926  | 0.98780      | 0.00245 | Time out at 17.5 s |

Sample name: **M08\_octanol**  
 Assay name: **pH-metric high logP**  
 Assay ID: **18C-02008**  
 Filename: **C:\Sirius\_T3\Mehtap\20180302\_exp29\_logP\_T3-2\18C-02008\_M08\_octanol\_pH-metric high logP.t3r**

Experiment start time: **3/2/2018 6:51:30 PM**  
 Analyst: **Pion**  
 Instrument ID: **T312060**

## Events (continued)

| Time      | Event         | Water      | Acid       | Base       | Octanol    | pH     | dpH/dt   | pH R-squared | pH SD   | dpH/dt time |
|-----------|---------------|------------|------------|------------|------------|--------|----------|--------------|---------|-------------|
| 26:37.2   | Data point 20 | 1.50000 mL | 0.00868 mL | 0.00811 mL | 0.08000 mL | 4.665  | 0.01816  | 0.93657      | 0.00093 | 31.5 s      |
| 27:34.0   | Data point 21 | 1.50000 mL | 0.00877 mL | 0.00811 mL | 0.08000 mL | 4.425  | 0.01775  | 0.90251      | 0.00092 | 12.5 s      |
| 28:17.1   | Data point 22 | 1.50000 mL | 0.00889 mL | 0.00811 mL | 0.08000 mL | 4.219  | 0.01953  | 0.93075      | 0.00100 | 11.0 s      |
| 29:08.8   | Data point 23 | 1.50000 mL | 0.00905 mL | 0.00811 mL | 0.08000 mL | 3.997  | 0.00018  | 0.00008      | 0.00098 | 10.0 s      |
| 29:44.2   | Data point 24 | 1.50000 mL | 0.00931 mL | 0.00811 mL | 0.08000 mL | 3.747  | 0.00337  | 0.08202      | 0.00058 | 10.0 s      |
| 30:35.1   | Data point 25 | 1.50000 mL | 0.00974 mL | 0.00811 mL | 0.08000 mL | 3.552  | 0.00143  | 0.03293      | 0.00039 | 10.0 s      |
| 31:10.5   | Data point 26 | 1.50000 mL | 0.01040 mL | 0.00811 mL | 0.08000 mL | 3.317  | 0.00181  | 0.11529      | 0.00026 | 10.0 s      |
| 32:01.5   | Data point 27 | 1.50000 mL | 0.01152 mL | 0.00811 mL | 0.08000 mL | 3.118  | -0.00447 | 0.58442      | 0.00029 | 10.5 s      |
| 32:37.5   | Data point 28 | 1.50000 mL | 0.01326 mL | 0.00811 mL | 0.08000 mL | 2.917  | -0.00516 | 0.25417      | 0.00051 | 10.0 s      |
| 33:13.0   | Data point 29 | 1.50000 mL | 0.01604 mL | 0.00811 mL | 0.08000 mL | 2.730  | -0.01202 | 0.42201      | 0.00091 | 10.0 s      |
| 33:48.5   | Data point 30 | 1.50000 mL | 0.02032 mL | 0.00811 mL | 0.08000 mL | 2.540  | -0.00759 | 0.75110      | 0.00043 | 10.5 s      |
| 34:24.6   | Data point 31 | 1.50000 mL | 0.02702 mL | 0.00811 mL | 0.08000 mL | 2.348  | -0.00583 | 0.78723      | 0.00032 | 10.0 s      |
| 35:00.3   | Data point 32 | 1.50000 mL | 0.03765 mL | 0.00811 mL | 0.08000 mL | 2.149  | -0.01355 | 0.91748      | 0.00070 | 10.5 s      |
| 35:36.6   | Data point 33 | 1.50000 mL | 0.05496 mL | 0.00811 mL | 0.08000 mL | 1.953  | -0.01411 | 0.85512      | 0.00075 | 10.5 s      |
| 36:44.7   | Data point 34 | 1.50000 mL | 0.05496 mL | 0.06333 mL | 0.28000 mL | 10.137 | -0.00357 | 0.03271      | 0.00098 | 37.5 s      |
| 37:52.8   | Data point 35 | 1.50000 mL | 0.05522 mL | 0.06333 mL | 0.28000 mL | 9.598  | 0.01355  | 0.57771      | 0.00088 | 51.5 s      |
| 39:09.8   | Data point 36 | 1.50000 mL | 0.05529 mL | 0.06333 mL | 0.28000 mL | 9.232  | 0.01873  | 0.90967      | 0.00097 | 55.5 s      |
| 40:41.0   | Data point 37 | 1.50000 mL | 0.05539 mL | 0.06333 mL | 0.28000 mL | 8.688  | -0.00364 | 0.04343      | 0.00086 | 40.0 s      |
| 41:56.7   | Data point 38 | 1.50000 mL | 0.05548 mL | 0.06333 mL | 0.28000 mL | 8.299  | 0.01075  | 0.31366      | 0.00095 | 10.5 s      |
| 42:43.0   | Data point 39 | 1.50000 mL | 0.05560 mL | 0.06333 mL | 0.28000 mL | 8.053  | 0.01326  | 0.61367      | 0.00084 | 12.0 s      |
| 43:30.7   | Data point 40 | 1.50000 mL | 0.05576 mL | 0.06333 mL | 0.28000 mL | 7.808  | 0.01660  | 0.85424      | 0.00089 | 12.5 s      |
| 44:18.9   | Data point 41 | 1.50000 mL | 0.05602 mL | 0.06333 mL | 0.28000 mL | 7.592  | 0.01619  | 0.81503      | 0.00089 | 14.5 s      |
| 44:58.8   | Data point 42 | 1.50000 mL | 0.05637 mL | 0.06333 mL | 0.28000 mL | 7.376  | 0.01819  | 0.83297      | 0.00098 | 11.5 s      |
| 45:35.7   | Data point 43 | 1.50000 mL | 0.05689 mL | 0.06333 mL | 0.28000 mL | 7.176  | 0.01797  | 0.88644      | 0.00094 | 12.5 s      |
| 46:13.6   | Data point 44 | 1.50000 mL | 0.05757 mL | 0.06333 mL | 0.28000 mL | 6.991  | 0.01928  | 0.96006      | 0.00097 | 12.0 s      |
| 46:51.1   | Data point 45 | 1.50000 mL | 0.05842 mL | 0.06333 mL | 0.28000 mL | 6.803  | 0.01836  | 0.93846      | 0.00094 | 12.5 s      |
| 47:29.0   | Data point 46 | 1.50000 mL | 0.05938 mL | 0.06333 mL | 0.28000 mL | 6.627  | 0.01804  | 0.92322      | 0.00093 | 12.5 s      |
| 48:06.9   | Data point 47 | 1.50000 mL | 0.06037 mL | 0.06333 mL | 0.28000 mL | 6.455  | 0.01858  | 0.93024      | 0.00095 | 16.5 s      |
| 48:48.9   | Data point 48 | 1.50000 mL | 0.06134 mL | 0.06333 mL | 0.28000 mL | 6.281  | 0.01664  | 0.78265      | 0.00093 | 17.5 s      |
| 49:31.9   | Data point 49 | 1.50000 mL | 0.06218 mL | 0.06333 mL | 0.28000 mL | 6.101  | 0.01692  | 0.74989      | 0.00096 | 17.0 s      |
| 50:14.3   | Data point 50 | 1.50000 mL | 0.06289 mL | 0.06333 mL | 0.28000 mL | 5.907  | 0.01653  | 0.76306      | 0.00093 | 17.5 s      |
| 50:57.3   | Data point 51 | 1.50000 mL | 0.06341 mL | 0.06333 mL | 0.28000 mL | 5.681  | 0.01220  | 0.53640      | 0.00082 | 15.5 s      |
| 51:38.2   | Data point 52 | 1.50000 mL | 0.06376 mL | 0.06333 mL | 0.28000 mL | 5.471  | 0.01147  | 0.51173      | 0.00079 | 15.0 s      |
| 52:18.6   | Data point 53 | 1.50000 mL | 0.06399 mL | 0.06333 mL | 0.28000 mL | 5.290  | 0.01455  | 0.56277      | 0.00096 | 14.5 s      |
| 53:03.6   | Data point 54 | 1.50000 mL | 0.06430 mL | 0.06333 mL | 0.28000 mL | 4.851  | 0.01470  | 0.53131      | 0.00100 | 14.0 s      |
| 53:48.2   | Data point 55 | 1.50000 mL | 0.06446 mL | 0.06333 mL | 0.28000 mL | 4.594  | 0.01132  | 0.40356      | 0.00088 | 12.5 s      |
| 54:31.4   | Data point 56 | 1.50000 mL | 0.06465 mL | 0.06333 mL | 0.28000 mL | 4.279  | 0.00590  | 0.14884      | 0.00076 | 11.5 s      |
| 55:13.4   | Data point 57 | 1.50000 mL | 0.06491 mL | 0.06333 mL | 0.28000 mL | 3.965  | 0.00967  | 0.40120      | 0.00075 | 10.0 s      |
| 56:04.3   | Data point 58 | 1.50000 mL | 0.06524 mL | 0.06333 mL | 0.28000 mL | 3.759  | 0.00813  | 0.49244      | 0.00057 | 10.0 s      |
| 56:55.2   | Data point 59 | 1.50000 mL | 0.06566 mL | 0.06333 mL | 0.28000 mL | 3.552  | -0.00215 | 0.16107      | 0.00027 | 10.0 s      |
| 57:30.6   | Data point 60 | 1.50000 mL | 0.06635 mL | 0.06333 mL | 0.28000 mL | 3.331  | -0.00414 | 0.34668      | 0.00035 | 10.0 s      |
| 58:06.0   | Data point 61 | 1.50000 mL | 0.06747 mL | 0.06333 mL | 0.28000 mL | 3.126  | -0.00603 | 0.61652      | 0.00038 | 10.0 s      |
| 58:41.5   | Data point 62 | 1.50000 mL | 0.06931 mL | 0.06333 mL | 0.28000 mL | 2.927  | -0.00487 | 0.09075      | 0.00080 | 10.0 s      |
| 59:17.0   | Data point 63 | 1.50000 mL | 0.07220 mL | 0.06333 mL | 0.28000 mL | 2.726  | 0.00082  | 0.04244      | 0.00020 | 10.5 s      |
| 59:53.1   | Data point 64 | 1.50000 mL | 0.07683 mL | 0.06333 mL | 0.28000 mL | 2.519  | -0.00715 | 0.90269      | 0.00037 | 10.5 s      |
| 1:00:29.1 | Data point 65 | 1.50000 mL | 0.08441 mL | 0.06333 mL | 0.28000 mL | 2.334  | -0.01263 | 0.94471      | 0.00064 | 10.0 s      |
| 1:01:04.8 | Data point 66 | 1.50000 mL | 0.09624 mL | 0.06333 mL | 0.28000 mL | 2.133  | -0.01155 | 0.84750      | 0.00062 | 10.0 s      |
| 1:01:40.7 | Data point 67 | 1.50000 mL | 0.11392 mL | 0.06333 mL | 0.28000 mL | 1.953  | -0.00652 | 0.61375      | 0.00041 | 10.5 s      |
| 1:03:34.1 | Data point 68 | 1.50000 mL | 0.11392 mL | 0.12345 mL | 1.08000 mL | 10.164 | -0.01244 | 0.38157      | 0.00099 | 45.0 s      |
| 1:04:49.8 | Data point 69 | 1.50000 mL | 0.11423 mL | 0.12345 mL | 1.08000 mL | 9.832  | -0.00830 | 0.23375      | 0.00085 | 37.5 s      |
| 1:05:52.7 | Data point 70 | 1.50000 mL | 0.11439 mL | 0.12345 mL | 1.08000 mL | 9.598  | -0.01486 | 0.60594      | 0.00094 | 38.0 s      |
| 1:06:56.1 | Data point 71 | 1.50000 mL | 0.11451 mL | 0.12345 mL | 1.08000 mL | 9.421  | -0.00966 | 0.27141      | 0.00092 | 53.0 s      |
| 1:08:14.6 | Data point 72 | 1.50000 mL | 0.11461 mL | 0.12345 mL | 1.08000 mL | 9.256  | -0.00823 | 0.36404      | 0.00067 | 11.0 s      |
| 1:09:01.3 | Data point 73 | 1.50000 mL | 0.11475 mL | 0.12345 mL | 1.08000 mL | 9.009  | 0.01389  | 0.51931      | 0.00095 | 18.0 s      |
| 1:09:55.0 | Data point 74 | 1.50000 mL | 0.11489 mL | 0.12345 mL | 1.08000 mL | 8.754  | 0.00577  | 0.08155      | 0.00100 | 20.0 s      |
| 1:10:50.8 | Data point 75 | 1.50000 mL | 0.11503 mL | 0.12345 mL | 1.08000 mL | 8.520  | 0.01828  | 0.95610      | 0.00092 | 21.5 s      |
| 1:11:48.1 | Data point 76 | 1.50000 mL | 0.11522 mL | 0.12345 mL | 1.08000 mL | 8.286  | 0.01567  | 0.71329      | 0.00092 | 20.5 s      |

Sample name: **M08\_octanol**  
 Assay name: **pH-metric high logP**  
 Assay ID: **18C-02008**  
 Filename: **C:\Sirius\_T3\Mehtap\20180302\_exp29\_logP\_T3-2\18C-02008\_M08\_octanol\_pH-metric high logP.t3r**

Experiment start time: **3/2/2018 6:51:30 PM**  
 Analyst: **Pion**  
 Instrument ID: **T312060**

## Events (continued)

| Time      | Event          | Water      | Acid       | Base       | Octanol    | pH    | dpH/dt   | pH R-squared | pH SD   | dpH/dt time |
|-----------|----------------|------------|------------|------------|------------|-------|----------|--------------|---------|-------------|
| 1:12:34.1 | Data point 77  | 1.50000 mL | 0.11550 mL | 0.12345 mL | 1.08000 mL | 8.054 | 0.00873  | 0.25062      | 0.00086 | 24.0 s      |
| 1:13:23.5 | Data point 78  | 1.50000 mL | 0.11592 mL | 0.12345 mL | 1.08000 mL | 7.830 | 0.01471  | 0.68425      | 0.00088 | 22.0 s      |
| 1:14:11.0 | Data point 79  | 1.50000 mL | 0.11653 mL | 0.12345 mL | 1.08000 mL | 7.615 | 0.01082  | 0.31604      | 0.00095 | 21.0 s      |
| 1:14:57.5 | Data point 80  | 1.50000 mL | 0.11733 mL | 0.12345 mL | 1.08000 mL | 7.406 | 0.01311  | 0.67015      | 0.00079 | 27.5 s      |
| 1:15:50.4 | Data point 81  | 1.50000 mL | 0.11827 mL | 0.12345 mL | 1.08000 mL | 7.204 | 0.01583  | 0.70594      | 0.00093 | 24.5 s      |
| 1:16:40.4 | Data point 82  | 1.50000 mL | 0.11926 mL | 0.12345 mL | 1.08000 mL | 7.008 | 0.01015  | 0.26007      | 0.00098 | 22.0 s      |
| 1:17:27.9 | Data point 83  | 1.50000 mL | 0.12020 mL | 0.12345 mL | 1.08000 mL | 6.829 | 0.00824  | 0.26586      | 0.00079 | 29.0 s      |
| 1:18:37.8 | Data point 84  | 1.50000 mL | 0.12114 mL | 0.12345 mL | 1.08000 mL | 6.639 | 0.01737  | 0.74638      | 0.00099 | 35.0 s      |
| 1:19:38.3 | Data point 85  | 1.50000 mL | 0.12180 mL | 0.12345 mL | 1.08000 mL | 6.453 | 0.01561  | 0.66863      | 0.00094 | 33.0 s      |
| 1:20:52.2 | Data point 86  | 1.50000 mL | 0.12239 mL | 0.12345 mL | 1.08000 mL | 6.268 | 0.01016  | 0.29466      | 0.00092 | 25.5 s      |
| 1:21:43.1 | Data point 87  | 1.50000 mL | 0.12277 mL | 0.12345 mL | 1.08000 mL | 6.082 | 0.01424  | 0.61244      | 0.00090 | 24.0 s      |
| 1:22:37.7 | Data point 88  | 1.50000 mL | 0.12310 mL | 0.12345 mL | 1.08000 mL | 5.882 | 0.00792  | 0.16581      | 0.00096 | 19.0 s      |
| 1:23:37.7 | Data point 89  | 1.50000 mL | 0.12335 mL | 0.12345 mL | 1.08000 mL | 5.690 | 0.00115  | 0.00389      | 0.00091 | 23.5 s      |
| 1:24:31.7 | Data point 90  | 1.50000 mL | 0.12352 mL | 0.12345 mL | 1.08000 mL | 5.467 | 0.01785  | 0.83193      | 0.00097 | 22.5 s      |
| 1:25:24.8 | Data point 91  | 1.50000 mL | 0.12366 mL | 0.12345 mL | 1.08000 mL | 5.243 | 0.01854  | 0.86754      | 0.00098 | 29.5 s      |
| 1:26:24.8 | Data point 92  | 1.50000 mL | 0.12375 mL | 0.12345 mL | 1.08000 mL | 5.042 | 0.00911  | 0.28586      | 0.00084 | 14.5 s      |
| 1:27:09.9 | Data point 93  | 1.50000 mL | 0.12392 mL | 0.12345 mL | 1.08000 mL | 4.612 | -0.01412 | 0.49010      | 0.00100 | 12.0 s      |
| 1:27:52.4 | Data point 94  | 1.50000 mL | 0.12406 mL | 0.12345 mL | 1.08000 mL | 4.363 | 0.01967  | 0.96830      | 0.00099 | 17.0 s      |
| 1:28:45.1 | Data point 95  | 1.50000 mL | 0.12425 mL | 0.12345 mL | 1.08000 mL | 4.149 | 0.00177  | 0.01471      | 0.00072 | 10.5 s      |
| 1:29:31.3 | Data point 96  | 1.50000 mL | 0.12448 mL | 0.12345 mL | 1.08000 mL | 3.934 | -0.00929 | 0.21345      | 0.00099 | 23.5 s      |
| 1:30:35.6 | Data point 97  | 1.50000 mL | 0.12488 mL | 0.12345 mL | 1.08000 mL | 3.715 | -0.00629 | 0.73094      | 0.00036 | 10.0 s      |
| 1:31:26.6 | Data point 98  | 1.50000 mL | 0.12547 mL | 0.12345 mL | 1.08000 mL | 3.517 | -0.01016 | 0.69269      | 0.00060 | 10.0 s      |
| 1:32:02.1 | Data point 99  | 1.50000 mL | 0.12627 mL | 0.12345 mL | 1.08000 mL | 3.321 | -0.01475 | 0.90060      | 0.00077 | 10.0 s      |
| 1:32:37.6 | Data point 100 | 1.50000 mL | 0.12752 mL | 0.12345 mL | 1.08000 mL | 3.134 | -0.00934 | 0.64893      | 0.00057 | 10.5 s      |
| 1:33:13.4 | Data point 101 | 1.50000 mL | 0.12945 mL | 0.12345 mL | 1.08000 mL | 2.940 | 0.00025  | 0.00017      | 0.00095 | 23.5 s      |
| 1:34:02.5 | Data point 102 | 1.50000 mL | 0.13245 mL | 0.12345 mL | 1.08000 mL | 2.741 | -0.01740 | 0.87852      | 0.00092 | 10.0 s      |
| 1:34:38.0 | Data point 103 | 1.50000 mL | 0.13730 mL | 0.12345 mL | 1.08000 mL | 2.539 | -0.01964 | 0.96661      | 0.00099 | 10.5 s      |
| 1:35:14.2 | Data point 104 | 1.50000 mL | 0.14508 mL | 0.12345 mL | 1.08000 mL | 2.343 | 0.00480  | 0.07839      | 0.00085 | 15.0 s      |
| 1:35:54.9 | Data point 105 | 1.50000 mL | 0.15746 mL | 0.12345 mL | 1.08000 mL | 2.149 | -0.01890 | 0.90387      | 0.00098 | 13.5 s      |
| 1:36:34.4 | Data point 106 | 1.50000 mL | 0.17738 mL | 0.12345 mL | 1.08000 mL | 1.950 | -0.01112 | 0.54218      | 0.00075 | 20.5 s      |
| 1:37:04.0 | Assay volumes  | 1.50000 mL | 0.17738 mL | 0.12345 mL | 1.08000 mL |       |          |              |         |             |



Sample name: **M08\_octanol**  
 Assay name: **pH-metric high logP**  
 Assay ID: **18C-02008**  
 Filename: **C:\Sirius\_T3\Mehtap\20180302\_exp29\_logP\_T3-2\18C-02008\_M08\_octanol\_pH-metric high logP.t3r**

Experiment start time: **3/2/2018 6:51:30 PM**  
 Analyst: **Pion**  
 Instrument ID: **T312060**

## Assay Settings

| Setting                             | Value              | Original Value | Date/Time changed | Imported from |
|-------------------------------------|--------------------|----------------|-------------------|---------------|
| <b>General Settings</b>             |                    |                |                   |               |
| Analyst name                        | Pion               |                |                   |               |
| <b>Standard Experiment Settings</b> |                    |                |                   |               |
| Number of titrations                | 3                  |                |                   |               |
| Minimum pH                          | 2.000              |                |                   |               |
| Maximum pH                          | 10.000             |                |                   |               |
| pH step between points of           | 0.200              |                |                   |               |
| Minimum titrant addition            | 0.00002 mL         |                |                   |               |
| Maximum titrant addition            | 0.10000 mL         |                |                   |               |
| Argon flow rate                     | 100%               |                |                   |               |
| Start titration using               | Cautious pH adjust |                |                   |               |
| <b>Advanced General Settings</b>    |                    |                |                   |               |
| Detect turbidity using              | None               |                |                   |               |
| Collect turbidity sensor data       | No                 |                |                   |               |
| Collect UV spectra                  | No                 |                |                   |               |
| Stir after titrant addition for     | 5 seconds          |                |                   |               |
| For titrant addition, stir at       | 10%                |                |                   |               |
| <b>Titration Pre-Dose</b>           |                    |                |                   |               |
| Titration pre-dose                  | None               |                |                   |               |
| <b>Assay Medium</b>                 |                    |                |                   |               |
| ISA water volume                    | 1.50 mL            |                |                   |               |
| Water added                         | Automatic          |                |                   |               |
| Partition solvent type              | Octanol            |                |                   |               |
| Partition volume                    | 0.080 mL           |                |                   |               |
| Partition solvent added             | Manual in advance  |                |                   |               |
| After partition addition, stir for  | 1 seconds          |                |                   |               |
| <b>Sample Sonication</b>            |                    |                |                   |               |
| Sonicate                            | Yes                |                |                   |               |
| Adjust pH for sonication            | No                 |                |                   |               |
| Sonicate for                        | 120 seconds        |                |                   |               |
| After sonication stir for           | 5 seconds          |                |                   |               |
| <b>Sample Dissolution</b>           |                    |                |                   |               |
| Perform a dissolution stage         | Yes                |                |                   |               |
| Adjust and hold pH for dissolution  | To start pH        |                |                   |               |
| Stir to dissolve for                | 120 seconds        |                |                   |               |
| For dissolution, stir at            | 10%                |                |                   |               |
| <b>Carbonate purge</b>              |                    |                |                   |               |
| Perform a carbonate purge           | No                 |                |                   |               |
| <b>Temperature Control</b>          |                    |                |                   |               |
| Wait for temperature                | Yes                |                |                   |               |
| Required start temperature          | 25.0°C             |                |                   |               |
| Acceptable deviation                | 0.5°C              |                |                   |               |
| Time to wait                        | 60 seconds         |                |                   |               |
| Stir speed of                       | 50%                |                |                   |               |
| <b>Titration 1</b>                  |                    |                |                   |               |
| Titrate from                        | High to low pH     |                |                   |               |
| Adjust to start pH                  | Yes                |                |                   |               |
| After pH adjust stir for            | 30 seconds         |                |                   |               |
| Stir to allow partitioning for      | 15 seconds         |                |                   |               |
| Stirrer speed for partitioning      | 50%                |                |                   |               |
| <b>Titration 2</b>                  |                    |                |                   |               |
| Titrate from                        | High to low pH     |                |                   |               |
| Add additional water                | 0.00 mL            |                |                   |               |
| Additional partition solvent volume | 0.200 mL           |                |                   |               |
| Additional partition solvent added  | Automatic          |                |                   |               |
| After pH adjust stir for            | 30 seconds         |                |                   |               |
| Stir to allow partitioning for      | 15 seconds         |                |                   |               |
| Stirrer speed for partitioning      | 55%                |                |                   |               |



Sample name: **M08\_octanol**  
 Assay name: **pH-metric high logP**  
 Assay ID: **18C-02008**  
 Filename: **C:\Sirius\_T3\Mehtap\20180302\_exp29\_logP\_T3-2\18C-02008\_M08\_octanol\_pH-metric high logP.t3r**

Experiment start time: **3/2/2018 6:51:30 PM**  
 Analyst: **Pion**  
 Instrument ID: **T312060**

## Assay Settings (continued)

| Setting                             | Value          | Original Value | Date/Time changed | Imported from |
|-------------------------------------|----------------|----------------|-------------------|---------------|
| <b>Titration 3</b>                  |                |                |                   |               |
| Titrate from                        | High to low pH |                |                   |               |
| Add additional water                | 0.00 mL        |                |                   |               |
| Additional partition solvent volume | 0.800 mL       |                |                   |               |
| Additional partition solvent added  | Automatic      |                |                   |               |
| After pH adjust stir for            | 30 seconds     |                |                   |               |
| Stir to allow partitioning for      | 15 seconds     |                |                   |               |
| Stirrer speed for partitioning      | 60%            |                |                   |               |
| <b>Data Point Stability</b>         |                |                |                   |               |
| Stir during data point collection   | No             |                |                   |               |
| Delay before data point collection  | 0 seconds      |                |                   |               |
| Number of points to average         | 20 points      |                |                   |               |
| Time interval between points        | 0.50 seconds   |                |                   |               |
| Required maximum standard deviation | 0.00100 dpH/dt |                |                   |               |
| Stability timeout after             | 60 seconds     |                |                   |               |

## Calibration Settings

| Setting                   | Value  | Date/Time changed   | Imported from             |
|---------------------------|--------|---------------------|---------------------------|
| Four-Plus alpha           | 0.111  | 3/2/2018 6:51:30 PM | C:\Sirius_T3\HCl18C02.t3r |
| Four-Plus S               | 0.9988 | 3/2/2018 6:51:30 PM | C:\Sirius_T3\HCl18C02.t3r |
| Four-Plus jH              | 1.0    | 3/2/2018 6:51:30 PM | C:\Sirius_T3\HCl18C02.t3r |
| Four-Plus jOH             | -0.8   | 3/2/2018 6:51:30 PM | C:\Sirius_T3\HCl18C02.t3r |
| Base concentration factor | 1.000  | 3/2/2018 6:51:30 PM | C:\Sirius_T3\KOH18B27.t3r |
| Acid concentration factor | 0.999  | 3/2/2018 6:51:30 PM | C:\Sirius_T3\HCl18C02.t3r |

## Instrument Settings

| Setting              | Value                      | Batch Id    | Install date           |
|----------------------|----------------------------|-------------|------------------------|
| Instrument owner     | Merck                      |             |                        |
| Instrument ID        | T312060                    |             |                        |
| Instrument type      | T3 Simulator               |             |                        |
| Software version     | 1.1.3.0                    |             |                        |
| Dispenser module     |                            | T3DM1200361 | 3/31/2009 5:24:52 AM   |
| Dispenser 0          | Water                      |             | 3/31/2009 5:25:05 AM   |
| Syringe volume       | 2.5 mL                     |             |                        |
| Firmware version     | 1.2.1(r2)                  |             |                        |
| Titrant              | Water (0.15 M KCl)         | 02-06-2018  | 2/27/2018 10:05:59 AM  |
| Dispenser 2          | Acid                       |             | 3/31/2009 5:25:11 AM   |
| Syringe volume       | 0.5 mL                     |             |                        |
| Firmware version     | 1.2.1(r2)                  |             |                        |
| Titrant              | Acid (0.5 M HCl)           | 02-27-2018  | 2/27/2018 10:27:22 AM  |
| Dispenser 1          | Base                       |             | 3/31/2009 5:25:21 AM   |
| Syringe volume       | 0.5 mL                     |             |                        |
| Firmware version     | 1.2.1(r2)                  |             |                        |
| Titrant              | Base (0.5 M KOH)           | 9/22/2017   | 2/27/2018 10:21:22 AM  |
| Dispenser 5          | Cosolvent                  |             | 3/31/2009 5:26:24 AM   |
| Syringe volume       | 2.5 mL                     |             |                        |
| Firmware version     | 1.2.1(r2)                  |             |                        |
| Distribution valve 5 | Distribution Valve         |             | 3/31/2009 5:28:19 AM   |
| Firmware version     | 1.1.3                      |             |                        |
| Port A               | Methanol (80%, 0.15 M KCl) | 09-26-17    | 2/7/2018 9:42:01 AM    |
| Port B               | Cyclohexane                | 11-01-17    | 2/27/2018 10:37:57 AM  |
| Dispenser 3          | Buffer                     |             | 8/3/2010 5:05:16 AM    |
| Syringe volume       | 0.5 mL                     |             |                        |
| Firmware version     | 1.2.1(r2)                  |             |                        |
| Titrant              | Dodecane                   | 2018/01/31  | 2/28/2018 10:18:04 AM  |
| Dispenser 6          | Octanol                    |             | 10/22/2010 10:52:43 AM |

Sample name: **M08\_octanol**  
 Assay name: **pH-metric high logP**  
 Assay ID: **18C-02008**  
 Filename: **C:\Sirius\_T3\Mehtap\20180302\_exp29\_logP\_T3-2\18C-02008\_M08\_octanol\_pH-metric high logP.t3r**

Experiment start time: **3/2/2018 6:51:30 PM**  
 Analyst: **Pion**  
 Instrument ID: **T312060**

## Instrument Settings (continued)

| Setting                                   | Value                      | Batch Id    | Install date           |
|-------------------------------------------|----------------------------|-------------|------------------------|
| Syringe volume                            | 0.5 mL                     |             |                        |
| Firmware version                          | 1.2.1(r2)                  |             |                        |
| Titration                                 | Octanol                    | 01-31-2018  | 2/27/2018 9:59:35 AM   |
| Titration                                 |                            | T3TM1200161 | 3/31/2009 5:24:17 AM   |
| Horizontal axis firmware version          | 1.17 AI1DI2DO2 Stepper 2   |             |                        |
| Vertical axis firmware version            | 1.17 AI1DI2DO2 Stepper 2   |             |                        |
| Chassis I/O firmware version              | 1.11 AI1DI0DO4 Norgren I/O |             |                        |
| Probe I/O firmware version                | 1.1.1                      |             |                        |
| Electrode                                 | T3 Electrode               | T3E0923     | 1/23/2018 2:01:00 PM   |
| E0 calibration                            | +2.88 mV                   |             | 3/2/2018 6:51:58 PM    |
| Filling solution                          | 3M KCl                     | KCL097      | 3/2/2018 9:43:24 AM    |
| Liquids                                   |                            |             |                        |
| Wash 1                                    | 50% IPA:50% Water          |             | 3/2/2018 9:45:12 AM    |
| Wash 2                                    | 0.5% Triton X-100 in H2O   |             | 3/2/2018 9:45:15 AM    |
| Buffer position 1                         | pH7 Wash                   |             | 3/2/2018 9:45:18 AM    |
| Buffer position 2                         | pH 7                       |             | 3/2/2018 9:45:21 AM    |
| Storage position                          |                            |             | 3/2/2018 9:44:44 AM    |
| Wash water                                | 7.3e+003 mL                | 02-27-2018  | 2/27/2018 9:54:39 AM   |
| Waste                                     | 8.1e+003 mL                |             | 11/28/2017 10:36:29 AM |
| Temperature controller                    |                            |             | 8/5/2010 6:35:13 AM    |
| Turbidity detector                        |                            |             | 3/31/2009 5:24:45 AM   |
| Spectrometer                              |                            | 074811      | 11/23/2010 11:22:28 AM |
| Dip probe                                 |                            | 10196       |                        |
| Wavelength coefficient A0                 | 183.333                    |             |                        |
| Wavelength coefficient A1                 | 2.21568                    |             |                        |
| Wavelength coefficient A2                 | -0.000289308               |             |                        |
| Total lamp lit time                       | 120:41:49                  |             | 11/23/2010 11:22:28 AM |
| Calibrated on                             | 2/27/2018 10:40:38 AM      |             |                        |
| Integration time                          | 40                         |             |                        |
| Scans averaged                            | 10                         |             |                        |
| Autoloader                                |                            | T3AL1200345 | 11/10/2015 9:34:13 AM  |
| Left-right axis firmware version          | 1.17 AI1DI2DO2 Stepper 2   |             |                        |
| Front-back axis firmware version          | 1.17 AI1DI2DO2 Stepper 2   |             |                        |
| Vertical axis firmware version            | 1.17 AI1DI2DO2 Stepper 2   |             |                        |
| Chassis I/O firmware version              | 1.11 AI1DI0DO4 Norgren I/O |             |                        |
| Configuration                             |                            |             |                        |
| Alternate titration position              | Titration position         |             |                        |
| Alternate reference position              | Reference position         |             |                        |
| Maximum standard vial volume              | 3.50 mL                    |             |                        |
| Maximum alternate vial volume             | 25.00 mL                   |             |                        |
| Automatic action idle period              | 5 minute(s)                |             |                        |
| Titration tube volume                     | 1.3 mL                     |             |                        |
| Syringe flush count                       | 3.50                       |             |                        |
| Flowing wash pump volume                  | 20.0 mL                    |             |                        |
| Flowing wash stir duration                | 5 s                        |             |                        |
| Flowing wash stir speed                   | 30%                        |             |                        |
| Solvent wash stir duration                | 5 s                        |             |                        |
| Solvent wash stir speed                   | 30%                        |             |                        |
| Surfactant wash stir duration             | 5 s                        |             |                        |
| Surfactant wash stir speed                | 30%                        |             |                        |
| E0 calibration minimum number of points   | 10                         |             |                        |
| E0 calibration maximum standard deviation | 0.01500                    |             |                        |
| E0 calibration timeout period             | 60 s                       |             |                        |
| E0 calibration stir duration              | 5 s                        |             |                        |
| E0 calibration preparation stir speed     | 30%                        |             |                        |
| E0 calibration buffer wash stir duration  | 5 s                        |             |                        |
| E0 calibration buffer wash stir speed     | 30%                        |             |                        |
| E0 calibration reading stir speed         | 0%                         |             |                        |

Sample name: **M08\_octanol** Experiment start time: **3/2/2018 6:51:30 PM**  
 Assay name: **pH-metric high logP** Analyst: **Pion**  
 Assay ID: **18C-02008** Instrument ID: **T312060**  
 Filename: **C:\Sirius\_T3\Mehtap\20180302\_exp29\_logP\_T3-2\18C-02008\_M08\_octanol\_pH-metric high logP.t3r**

## Instrument Settings (continued)

| Setting                                     | Value   | Batch Id | Install date |
|---------------------------------------------|---------|----------|--------------|
| Spectrometer calibration stir duration      | 5 s     |          |              |
| Spectrometer calibration stir speed         | 30%     |          |              |
| Spectrometer calibration wash pump volume   | 20.0 mL |          |              |
| Spectrometer calibration wash stir duration | 5 s     |          |              |
| Spectrometer calibration wash stir speed    | 30%     |          |              |
| Overhead dispense height                    | 10000   |          |              |

## Refinement Settings

| Setting                        | Value    | Default value |
|--------------------------------|----------|---------------|
| Turbidity detection method     | None     | None          |
| Turbidity wavelength to assess | 500.0 nm | 500.0 nm      |
| Turbidity maximum absorbance   | 0.100    | 0.100         |
| Turbidity probe threshold      | 50.00    | 50.00         |

## Experiment Log

[2:38] Air gap created for Water (0.15 M KCl)  
 [2:38] Air gap created for Acid (0.5 M HCl)  
 [2:39] Air gap created for Base (0.5 M KOH)  
 [2:39] Air gap released for Water (0.15 M KCl)  
 [2:43] Titrator arm moved over Titration position  
 [2:43] Titration 1 of 3  
 [2:43] Adding initial titrants  
 [2:43] Automatically add 1.50000 mL of water  
 [3:08] Dispensed 1.500000 mL of Water (0.15 M KCl)  
 [3:12] Titrator arm moved over Drain  
 [5:54] Titrator arm moved to Titration position  
 [5:54] Argon flow rate set to 100  
 [5:54] Stirrer speed set to 10  
 [6:00] Initial pH = 5.21  
 [6:00] Iterative adjust 5.21 -> 10.00  
 [6:00] pH 5.21 -> 10.00  
 [6:01] Air gap released for Base (0.5 M KOH)  
 [6:02] Dispensed 0.008114 mL of Base (0.5 M KOH)  
 [6:07] Holding pH 10.00  
 [8:07] Stirrer speed set to 0  
 [8:07] Stirrer speed set to 50  
 [8:07] Iterative adjust 11.12 -> 10.00  
 [8:52] Stirrer speed set to 0  
 [9:26] Datapoint id 2 collected  
 [9:26] Stirrer speed set to 50  
 [9:31] pH 10.39 -> 10.19  
 [9:31] Using cautious pH adjust  
 [9:32] Air gap released for Acid (0.5 M HCl)  
 [9:33] Dispensed 0.000212 mL of Acid (0.5 M HCl)  
 [9:38] Stepping pH = 10.07  
 [9:53] Stirrer speed set to 0  
 [10:48] Datapoint id 3 collected  
 [10:48] Charge balance equation is out by 50.1%  
 [10:48] Stirrer speed set to 50  
 [10:53] pH 9.64 -> 9.44  
 [10:53] Using cautious pH adjust  
 [10:54] Dispensed 0.000047 mL of Acid (0.5 M HCl)  
 [10:59] Stepping pH = 9.60  
 [10:59] Dispensed 0.000071 mL of Acid (0.5 M HCl)  
 [11:04] Stepping pH = 9.55  
 [11:04] Dispensed 0.000094 mL of Acid (0.5 M HCl)  
 [11:09] Stepping pH = 9.35

Sample name: **M08\_octanol**  
Assay name: **pH-metric high logP**  
Assay ID: **18C-02008**  
Filename: **C:\Sirius\_T3\Mehtap\20180302\_exp29\_logP\_T3-2\18C-02008\_M08\_octanol\_pH-metric high logP.t3r**

Experiment start time: **3/2/2018 6:51:30 PM**  
Analyst: **Pion**  
Instrument ID: **T312060**

## Experiment Log (continued)

[11:24] Stirrer speed set to 0  
[12:07] Datapoint id 4 collected  
[12:07] Charge balance equation is out by -137.2%  
[12:07] Stirrer speed set to 50  
[12:12] pH 8.90 -> 8.70  
[12:12] Using cautious pH adjust  
[12:12] Dispensed 0.000024 mL of Acid (0.5 M HCl)  
[12:17] Stepping pH = 8.82  
[12:17] Dispensed 0.000024 mL of Acid (0.5 M HCl)  
[12:22] Stepping pH = 8.74  
[12:22] Dispensed 0.000024 mL of Acid (0.5 M HCl)  
[12:28] Stepping pH = 8.61  
[12:43] Stirrer speed set to 0  
[13:43] Datapoint id 5 collected  
[13:43] Charge balance equation is out by -121.9%  
[13:43] Stirrer speed set to 50  
[13:48] pH 8.13 -> 7.93  
[13:48] Using cautious pH adjust  
[13:48] Dispensed 0.000024 mL of Acid (0.5 M HCl)  
[13:53] Stepping pH = 8.08  
[13:53] Dispensed 0.000047 mL of Acid (0.5 M HCl)  
[13:58] Stepping pH = 8.00  
[13:58] Dispensed 0.000024 mL of Acid (0.5 M HCl)  
[14:03] Stepping pH = 7.90  
[14:18] Stirrer speed set to 0  
[14:31] Datapoint id 6 collected  
[14:31] Charge balance equation is out by -91.6%  
[14:31] Stirrer speed set to 50  
[14:36] pH 7.77 -> 7.57  
[14:36] Using cautious pH adjust  
[14:36] Dispensed 0.000047 mL of Acid (0.5 M HCl)  
[14:41] Stepping pH = 7.72  
[14:41] Dispensed 0.000071 mL of Acid (0.5 M HCl)  
[14:46] Stepping pH = 7.57  
[15:01] Stirrer speed set to 0  
[15:16] Datapoint id 7 collected  
[15:16] Charge balance equation is out by -35.0%  
[15:16] Stirrer speed set to 50  
[15:21] pH 7.51 -> 7.31  
[15:21] Using cautious pH adjust  
[15:21] Dispensed 0.000071 mL of Acid (0.5 M HCl)  
[15:26] Stepping pH = 7.44  
[15:26] Dispensed 0.000118 mL of Acid (0.5 M HCl)  
[15:31] Stepping pH = 7.28  
[15:46] Stirrer speed set to 0  
[16:01] Datapoint id 8 collected  
[16:01] Charge balance equation is out by -17.3%  
[16:01] Stirrer speed set to 50  
[16:06] pH 7.29 -> 7.09  
[16:06] Using cautious pH adjust  
[16:06] Dispensed 0.000118 mL of Acid (0.5 M HCl)  
[16:12] Stepping pH = 7.20  
[16:12] Dispensed 0.000118 mL of Acid (0.5 M HCl)  
[16:17] Stepping pH = 7.10  
[16:17] Dispensed 0.000024 mL of Acid (0.5 M HCl)  
[16:22] Stepping pH = 7.10  
[16:22] Dispensed 0.000118 mL of Acid (0.5 M HCl)  
[16:27] Stepping pH = 7.02  
[16:42] Stirrer speed set to 0

Sample name: **M08\_octanol**  
Assay name: **pH-metric high logP**  
Assay ID: **18C-02008**  
Filename: **C:\Sirius\_T3\Mehtap\20180302\_exp29\_logP\_T3-2\18C-02008\_M08\_octanol\_pH-metric high logP.t3r**

Experiment start time: **3/2/2018 6:51:30 PM**  
Analyst: **Pion**  
Instrument ID: **T312060**

## Experiment Log (continued)

[16:58] Datapoint id 9 collected  
[16:58] Charge balance equation is out by -48.6%  
[16:58] Stirrer speed set to 50  
[17:03] pH 7.04 -> 6.84  
[17:03] Using cautious pH adjust  
[17:03] Dispensed 0.000188 mL of Acid (0.5 M HCl)  
[17:08] Stepping pH = 6.92  
[17:09] Dispensed 0.000118 mL of Acid (0.5 M HCl)  
[17:14] Stepping pH = 6.88  
[17:14] Dispensed 0.000071 mL of Acid (0.5 M HCl)  
[17:19] Stepping pH = 6.86  
[17:19] Dispensed 0.000047 mL of Acid (0.5 M HCl)  
[17:24] Stepping pH = 6.85  
[17:39] Stirrer speed set to 0  
[17:54] Datapoint id 10 collected  
[17:54] Charge balance equation is out by -11.0%  
[17:54] Stirrer speed set to 50  
[17:59] pH 6.86 -> 6.66  
[17:59] Using charge balance adjust  
[17:59] Dispensed 0.000541 mL of Acid (0.5 M HCl)  
[18:19] Stirrer speed set to 0  
[18:35] Datapoint id 11 collected  
[18:35] Charge balance equation is out by -2.2%  
[18:35] Stirrer speed set to 50  
[18:40] pH 6.66 -> 6.46  
[18:40] Using charge balance adjust  
[18:40] Dispensed 0.000706 mL of Acid (0.5 M HCl)  
[19:00] Stirrer speed set to 0  
[19:17] Datapoint id 12 collected  
[19:17] Charge balance equation is out by -10.0%  
[19:17] Stirrer speed set to 50  
[19:22] pH 6.48 -> 6.28  
[19:22] Using charge balance adjust  
[19:22] Dispensed 0.000847 mL of Acid (0.5 M HCl)  
[19:42] Stirrer speed set to 0  
[19:57] Datapoint id 13 collected  
[19:57] Charge balance equation is out by -11.9%  
[19:57] Stirrer speed set to 50  
[20:02] pH 6.31 -> 6.11  
[20:02] Using charge balance adjust  
[20:02] Dispensed 0.000964 mL of Acid (0.5 M HCl)  
[20:23] Stirrer speed set to 0  
[20:37] Datapoint id 14 collected  
[20:37] Charge balance equation is out by -3.1%  
[20:37] Stirrer speed set to 50  
[20:42] pH 6.12 -> 5.92  
[20:42] Using charge balance adjust  
[20:42] Dispensed 0.000988 mL of Acid (0.5 M HCl)  
[21:02] Stirrer speed set to 0  
[21:19] Datapoint id 15 collected  
[21:19] Charge balance equation is out by -3.5%  
[21:19] Stirrer speed set to 50  
[21:24] pH 5.93 -> 5.73  
[21:24] Using charge balance adjust  
[21:24] Dispensed 0.000941 mL of Acid (0.5 M HCl)  
[21:45] Stirrer speed set to 0  
[22:02] Datapoint id 16 collected  
[22:02] Charge balance equation is out by 12.1%  
[22:02] Stirrer speed set to 50

Sample name: **M08\_octanol**  
Assay name: **pH-metric high logP**  
Assay ID: **18C-02008**  
Filename: **C:\Sirius\_T3\Mehtap\20180302\_exp29\_logP\_T3-2\18C-02008\_M08\_octanol\_pH-metric high logP.t3r**

Experiment start time: **3/2/2018 6:51:30 PM**  
Analyst: **Pion**  
Instrument ID: **T312060**

## Experiment Log (continued)

[22:07] pH 5.71 -> 5.51  
[22:07] Using charge balance adjust  
[22:07] Dispensed 0.000776 mL of Acid (0.5 M HCl)  
[22:28] Stirrer speed set to 0  
[22:56] Datapoint id 17 collected  
[22:56] Charge balance equation is out by 25.0%  
[22:56] Stirrer speed set to 50  
[23:01] pH 5.46 -> 5.26  
[23:01] Using cautious pH adjust  
[23:01] Dispensed 0.000282 mL of Acid (0.5 M HCl)  
[23:06] Stepping pH = 5.35  
[23:06] Dispensed 0.000141 mL of Acid (0.5 M HCl)  
[23:11] Stepping pH = 5.28  
[23:11] Dispensed 0.000024 mL of Acid (0.5 M HCl)  
[23:16] Stepping pH = 5.28  
[23:16] Dispensed 0.000071 mL of Acid (0.5 M HCl)  
[23:21] Stepping pH = 5.24  
[23:36] Stirrer speed set to 0  
[24:36] Datapoint id 18 collected  
[24:36] Charge balance equation is out by 10.7%  
[24:36] Stirrer speed set to 50  
[24:42] pH 5.41 -> 5.21  
[24:42] Using charge balance adjust  
[24:42] Dispensed 0.000541 mL of Acid (0.5 M HCl)  
[25:02] Stirrer speed set to 0  
[26:02] Datapoint id 19 collected  
[26:02] Charge balance equation is out by 187.7%  
[26:02] Stirrer speed set to 50  
[26:07] pH 4.89 -> 4.69  
[26:07] Using cautious pH adjust  
[26:07] Dispensed 0.000118 mL of Acid (0.5 M HCl)  
[26:12] Stepping pH = 4.73  
[26:12] Dispensed 0.000024 mL of Acid (0.5 M HCl)  
[26:17] Stepping pH = 4.70  
[26:17] Dispensed 0.000024 mL of Acid (0.5 M HCl)  
[26:22] Stepping pH = 4.65  
[26:38] Stirrer speed set to 0  
[27:09] Datapoint id 20 collected  
[27:09] Charge balance equation is out by 31.0%  
[27:09] Stirrer speed set to 50  
[27:14] pH 4.68 -> 4.48  
[27:14] Using cautious pH adjust  
[27:14] Dispensed 0.000094 mL of Acid (0.5 M HCl)  
[27:19] Stepping pH = 4.44  
[27:34] Stirrer speed set to 0  
[27:47] Datapoint id 21 collected  
[27:47] Charge balance equation is out by 50.0%  
[27:47] Stirrer speed set to 50  
[27:52] pH 4.43 -> 4.23  
[27:52] Using cautious pH adjust  
[27:52] Dispensed 0.000071 mL of Acid (0.5 M HCl)  
[27:57] Stepping pH = 4.32  
[27:57] Dispensed 0.000047 mL of Acid (0.5 M HCl)  
[28:02] Stepping pH = 4.23  
[28:17] Stirrer speed set to 0  
[28:28] Datapoint id 22 collected  
[28:28] Charge balance equation is out by 19.5%  
[28:28] Stirrer speed set to 50  
[28:34] pH 4.22 -> 4.02



Sample name: **M08\_octanol**  
Assay name: **pH-metric high logP**  
Assay ID: **18C-02008**  
Filename: **C:\Sirius\_T3\Mehtap\20180302\_exp29\_logP\_T3-2\18C-02008\_M08\_octanol\_pH-metric high logP.t3r**

Experiment start time: **3/2/2018 6:51:30 PM**  
Analyst: **Pion**  
Instrument ID: **T312060**

## Experiment Log (continued)

[28:34] Using cautious pH adjust  
[28:34] Dispensed 0.000094 mL of Acid (0.5 M HCl)  
[28:39] Stepping pH = 4.08  
[28:39] Dispensed 0.000024 mL of Acid (0.5 M HCl)  
[28:44] Stepping pH = 4.05  
[28:44] Dispensed 0.000024 mL of Acid (0.5 M HCl)  
[28:49] Stepping pH = 4.04  
[28:49] Dispensed 0.000024 mL of Acid (0.5 M HCl)  
[28:54] Stepping pH = 4.01  
[29:09] Stirrer speed set to 0  
[29:19] Datapoint id 23 collected  
[29:19] Charge balance equation is out by 5.7%  
[29:19] Stirrer speed set to 50  
[29:24] pH 4.00 -> 3.80  
[29:24] Using charge balance adjust  
[29:24] Dispensed 0.000259 mL of Acid (0.5 M HCl)  
[29:45] Stirrer speed set to 0  
[29:55] Datapoint id 24 collected  
[29:55] Charge balance equation is out by 26.5%  
[29:55] Stirrer speed set to 50  
[30:00] pH 3.75 -> 3.55  
[30:00] Using cautious pH adjust  
[30:00] Dispensed 0.000212 mL of Acid (0.5 M HCl)  
[30:05] Stepping pH = 3.64  
[30:05] Dispensed 0.000141 mL of Acid (0.5 M HCl)  
[30:10] Stepping pH = 3.57  
[30:10] Dispensed 0.000047 mL of Acid (0.5 M HCl)  
[30:15] Stepping pH = 3.56  
[30:15] Dispensed 0.000024 mL of Acid (0.5 M HCl)  
[30:20] Stepping pH = 3.56  
[30:35] Stirrer speed set to 0  
[30:45] Datapoint id 25 collected  
[30:45] Charge balance equation is out by 1.3%  
[30:45] Stirrer speed set to 50  
[30:51] pH 3.55 -> 3.35  
[30:51] Using charge balance adjust  
[30:51] Dispensed 0.000659 mL of Acid (0.5 M HCl)  
[31:11] Stirrer speed set to 0  
[31:21] Datapoint id 26 collected  
[31:21] Charge balance equation is out by 18.1%  
[31:21] Stirrer speed set to 50  
[31:26] pH 3.32 -> 3.12  
[31:26] Using cautious pH adjust  
[31:26] Dispensed 0.000541 mL of Acid (0.5 M HCl)  
[31:31] Stepping pH = 3.21  
[31:31] Dispensed 0.000353 mL of Acid (0.5 M HCl)  
[31:36] Stepping pH = 3.15  
[31:36] Dispensed 0.000141 mL of Acid (0.5 M HCl)  
[31:42] Stepping pH = 3.13  
[31:42] Dispensed 0.000094 mL of Acid (0.5 M HCl)  
[31:47] Stepping pH = 3.12  
[32:02] Stirrer speed set to 0  
[32:12] Datapoint id 27 collected  
[32:12] Charge balance equation is out by -5.1%  
[32:12] Stirrer speed set to 50  
[32:17] pH 3.12 -> 2.92  
[32:17] Using charge balance adjust  
[32:18] Dispensed 0.001740 mL of Acid (0.5 M HCl)  
[32:38] Stirrer speed set to 0

Sample name: **M08\_octanol**  
Assay name: **pH-metric high logP**  
Assay ID: **18C-02008**  
Filename: **C:\Sirius\_T3\Mehtap\20180302\_exp29\_logP\_T3-2\18C-02008\_M08\_octanol\_pH-metric high logP.t3r**

Experiment start time: **3/2/2018 6:51:30 PM**  
Analyst: **Pion**  
Instrument ID: **T312060**

## Experiment Log (continued)

[32:48] Datapoint id 28 collected  
[32:48] Charge balance equation is out by 2.3%  
[32:48] Stirrer speed set to 50  
[32:53] pH 2.92 -> 2.72  
[32:53] Using charge balance adjust  
[32:53] Dispensed 0.002775 mL of Acid (0.5 M HCl)  
[33:13] Stirrer speed set to 0  
[33:23] Datapoint id 29 collected  
[33:23] Charge balance equation is out by -4.1%  
[33:23] Stirrer speed set to 50  
[33:28] pH 2.73 -> 2.53  
[33:28] Using charge balance adjust  
[33:29] Dispensed 0.004280 mL of Acid (0.5 M HCl)  
[33:49] Stirrer speed set to 0  
[33:59] Datapoint id 30 collected  
[33:59] Charge balance equation is out by -2.8%  
[33:59] Stirrer speed set to 50  
[34:04] pH 2.54 -> 2.34  
[34:04] Using charge balance adjust  
[34:05] Dispensed 0.006703 mL of Acid (0.5 M HCl)  
[34:25] Stirrer speed set to 0  
[34:35] Datapoint id 31 collected  
[34:35] Charge balance equation is out by -1.5%  
[34:35] Stirrer speed set to 50  
[34:40] pH 2.35 -> 2.15  
[34:40] Using charge balance adjust  
[34:40] Dispensed 0.010630 mL of Acid (0.5 M HCl)  
[35:01] Stirrer speed set to 0  
[35:11] Datapoint id 32 collected  
[35:11] Charge balance equation is out by 1.5%  
[35:11] Stirrer speed set to 50  
[35:16] pH 2.15 -> 1.95  
[35:16] Using charge balance adjust  
[35:17] Dispensed 0.017310 mL of Acid (0.5 M HCl)  
[35:37] Stirrer speed set to 0  
[35:47] Datapoint id 33 collected  
[35:47] Charge balance equation is out by -0.1%  
[35:47] Titration 2 of 3  
[35:47] Adding initial titrants  
[35:47] Automatically add 0.20000 mL of Octanol  
[35:52] Dispensed 0.200000 mL of Octanol  
[35:52] Stirrer speed set to 10  
[35:53] Stirrer speed set to 55  
[35:53] Iterative adjust 1.96 -> 10.00  
[35:53] pH 1.96 -> 10.00  
[35:55] Dispensed 0.055221 mL of Base (0.5 M KOH)  
[36:45] Stirrer speed set to 0  
[37:23] Datapoint id 34 collected  
[37:23] Stirrer speed set to 55  
[37:28] pH 10.05 -> 9.85  
[37:28] Using cautious pH adjust  
[37:28] Dispensed 0.000118 mL of Acid (0.5 M HCl)  
[37:33] Stepping pH = 9.99  
[37:33] Dispensed 0.000141 mL of Acid (0.5 M HCl)  
[37:38] Stepping pH = 9.81  
[37:53] Stirrer speed set to 0  
[38:45] Datapoint id 35 collected  
[38:45] Charge balance equation is out by -10.4%  
[38:45] Stirrer speed set to 55



Sample name: **M08\_octanol**  
Assay name: **pH-metric high logP**  
Assay ID: **18C-02008**  
Filename: **C:\Sirius\_T3\Mehtap\20180302\_exp29\_logP\_T3-2\18C-02008\_M08\_octanol\_pH-metric high logP.t3r**

Experiment start time: **3/2/2018 6:51:30 PM**  
Analyst: **Pion**  
Instrument ID: **T312060**

## Experiment Log (continued)

[38:50] pH 9.48 -> 9.28  
[38:50] Using charge balance adjust  
[38:50] Dispensed 0.000071 mL of Acid (0.5 M HCl)  
[39:10] Stirrer speed set to 0  
[40:06] Datapoint id 36 collected  
[40:06] Charge balance equation is out by 26.4%  
[40:06] Stirrer speed set to 55  
[40:11] pH 9.11 -> 8.91  
[40:11] Using cautious pH adjust  
[40:11] Dispensed 0.000024 mL of Acid (0.5 M HCl)  
[40:16] Stepping pH = 9.08  
[40:16] Dispensed 0.000047 mL of Acid (0.5 M HCl)  
[40:21] Stepping pH = 8.95  
[40:21] Dispensed 0.000024 mL of Acid (0.5 M HCl)  
[40:26] Stepping pH = 8.86  
[40:41] Stirrer speed set to 0  
[41:21] Datapoint id 37 collected  
[41:21] Charge balance equation is out by -100.8%  
[41:21] Stirrer speed set to 55  
[41:27] pH 8.60 -> 8.40  
[41:27] Using cautious pH adjust  
[41:27] Dispensed 0.000024 mL of Acid (0.5 M HCl)  
[41:32] Stepping pH = 8.56  
[41:32] Dispensed 0.000047 mL of Acid (0.5 M HCl)  
[41:37] Stepping pH = 8.42  
[41:37] Dispensed 0.000024 mL of Acid (0.5 M HCl)  
[41:42] Stepping pH = 8.36  
[41:57] Stirrer speed set to 0  
[42:08] Datapoint id 38 collected  
[42:08] Charge balance equation is out by -78.4%  
[42:08] Stirrer speed set to 55  
[42:13] pH 8.28 -> 8.08  
[42:13] Using cautious pH adjust  
[42:13] Dispensed 0.000047 mL of Acid (0.5 M HCl)  
[42:18] Stepping pH = 8.21  
[42:18] Dispensed 0.000047 mL of Acid (0.5 M HCl)  
[42:23] Stepping pH = 8.11  
[42:23] Dispensed 0.000024 mL of Acid (0.5 M HCl)  
[42:28] Stepping pH = 8.08  
[42:43] Stirrer speed set to 0  
[42:55] Datapoint id 39 collected  
[42:55] Charge balance equation is out by -33.8%  
[42:55] Stirrer speed set to 55  
[43:00] pH 8.04 -> 7.84  
[43:00] Using cautious pH adjust  
[43:00] Dispensed 0.000071 mL of Acid (0.5 M HCl)  
[43:06] Stepping pH = 7.94  
[43:06] Dispensed 0.000047 mL of Acid (0.5 M HCl)  
[43:11] Stepping pH = 7.89  
[43:11] Dispensed 0.000047 mL of Acid (0.5 M HCl)  
[43:16] Stepping pH = 7.83  
[43:31] Stirrer speed set to 0  
[43:44] Datapoint id 40 collected  
[43:44] Charge balance equation is out by -18.6%  
[43:44] Stirrer speed set to 55  
[43:49] pH 7.80 -> 7.60  
[43:49] Using cautious pH adjust  
[43:49] Dispensed 0.000118 mL of Acid (0.5 M HCl)  
[43:54] Stepping pH = 7.70

Sample name: **M08\_octanol**  
Assay name: **pH-metric high logP**  
Assay ID: **18C-02008**  
Filename: **C:\Sirius\_T3\Mehtap\20180302\_exp29\_logP\_T3-2\18C-02008\_M08\_octanol\_pH-metric high logP.t3r**

Experiment start time: **3/2/2018 6:51:30 PM**  
Analyst: **Pion**  
Instrument ID: **T312060**

## Experiment Log (continued)

[43:54] Dispensed 0.000094 mL of Acid (0.5 M HCl)  
[43:59] Stepping pH = 7.63  
[43:59] Dispensed 0.000047 mL of Acid (0.5 M HCl)  
[44:04] Stepping pH = 7.60  
[44:19] Stirrer speed set to 0  
[44:34] Datapoint id 41 collected  
[44:34] Charge balance equation is out by -7.6%  
[44:34] Stirrer speed set to 55  
[44:39] pH 7.59 -> 7.39  
[44:39] Using charge balance adjust  
[44:39] Dispensed 0.000353 mL of Acid (0.5 M HCl)  
[44:59] Stirrer speed set to 0  
[45:11] Datapoint id 42 collected  
[45:11] Charge balance equation is out by 4.7%  
[45:11] Stirrer speed set to 55  
[45:16] pH 7.37 -> 7.17  
[45:16] Using charge balance adjust  
[45:16] Dispensed 0.000517 mL of Acid (0.5 M HCl)  
[45:36] Stirrer speed set to 0  
[45:49] Datapoint id 43 collected  
[45:49] Charge balance equation is out by -1.7%  
[45:49] Stirrer speed set to 55  
[45:54] pH 7.17 -> 6.97  
[45:54] Using charge balance adjust  
[45:54] Dispensed 0.000682 mL of Acid (0.5 M HCl)  
[46:14] Stirrer speed set to 0  
[46:26] Datapoint id 44 collected  
[46:26] Charge balance equation is out by -8.7%  
[46:26] Stirrer speed set to 55  
[46:31] pH 6.99 -> 6.79  
[46:31] Using charge balance adjust  
[46:31] Dispensed 0.000847 mL of Acid (0.5 M HCl)  
[46:51] Stirrer speed set to 0  
[47:04] Datapoint id 45 collected  
[47:04] Charge balance equation is out by -5.3%  
[47:04] Stirrer speed set to 55  
[47:09] pH 6.80 -> 6.60  
[47:09] Using charge balance adjust  
[47:09] Dispensed 0.000964 mL of Acid (0.5 M HCl)  
[47:29] Stirrer speed set to 0  
[47:42] Datapoint id 46 collected  
[47:42] Charge balance equation is out by -11.4%  
[47:42] Stirrer speed set to 55  
[47:47] pH 6.63 -> 6.43  
[47:47] Using charge balance adjust  
[47:47] Dispensed 0.000988 mL of Acid (0.5 M HCl)  
[48:07] Stirrer speed set to 0  
[48:24] Datapoint id 47 collected  
[48:24] Charge balance equation is out by -13.9%  
[48:24] Stirrer speed set to 55  
[48:29] pH 6.45 -> 6.25  
[48:29] Using charge balance adjust  
[48:29] Dispensed 0.000964 mL of Acid (0.5 M HCl)  
[48:49] Stirrer speed set to 0  
[49:07] Datapoint id 48 collected  
[49:07] Charge balance equation is out by -14.7%  
[49:07] Stirrer speed set to 55  
[49:12] pH 6.28 -> 6.08  
[49:12] Using charge balance adjust

Sample name: **M08\_octanol**  
Assay name: **pH-metric high logP**  
Assay ID: **18C-02008**  
Filename: **C:\Sirius\_T3\Mehtap\20180302\_exp29\_logP\_T3-2\18C-02008\_M08\_octanol\_pH-metric high logP.t3r**

Experiment start time: **3/2/2018 6:51:30 PM**  
Analyst: **Pion**  
Instrument ID: **T312060**

## Experiment Log (continued)

[49:12] Dispensed 0.000847 mL of Acid (0.5 M HCl)  
[49:32] Stirrer speed set to 0  
[49:49] Datapoint id 49 collected  
[49:49] Charge balance equation is out by -13.2%  
[49:49] Stirrer speed set to 55  
[49:54] pH 6.09 -> 5.89  
[49:54] Using charge balance adjust  
[49:54] Dispensed 0.000706 mL of Acid (0.5 M HCl)  
[50:15] Stirrer speed set to 0  
[50:32] Datapoint id 50 collected  
[50:32] Charge balance equation is out by -7.5%  
[50:32] Stirrer speed set to 55  
[50:37] pH 5.90 -> 5.70  
[50:37] Using charge balance adjust  
[50:37] Dispensed 0.000517 mL of Acid (0.5 M HCl)  
[50:58] Stirrer speed set to 0  
[51:13] Datapoint id 51 collected  
[51:13] Charge balance equation is out by 7.5%  
[51:13] Stirrer speed set to 55  
[51:18] pH 5.67 -> 5.47  
[51:18] Using charge balance adjust  
[51:18] Dispensed 0.000353 mL of Acid (0.5 M HCl)  
[51:38] Stirrer speed set to 0  
[51:54] Datapoint id 52 collected  
[51:54] Charge balance equation is out by -2.1%  
[51:54] Stirrer speed set to 55  
[51:59] pH 5.46 -> 5.26  
[51:59] Using charge balance adjust  
[51:59] Dispensed 0.000235 mL of Acid (0.5 M HCl)  
[52:19] Stirrer speed set to 0  
[52:33] Datapoint id 53 collected  
[52:33] Charge balance equation is out by -17.6%  
[52:33] Stirrer speed set to 55  
[52:39] pH 5.27 -> 5.07  
[52:39] Using cautious pH adjust  
[52:39] Dispensed 0.000094 mL of Acid (0.5 M HCl)  
[52:44] Stepping pH = 5.25  
[52:44] Dispensed 0.000212 mL of Acid (0.5 M HCl)  
[52:49] Stepping pH = 4.83  
[53:04] Stirrer speed set to 0  
[53:18] Datapoint id 54 collected  
[53:18] Charge balance equation is out by -65.9%  
[53:18] Stirrer speed set to 55  
[53:23] pH 4.84 -> 4.64  
[53:23] Using cautious pH adjust  
[53:23] Dispensed 0.000047 mL of Acid (0.5 M HCl)  
[53:28] Stepping pH = 4.81  
[53:28] Dispensed 0.000118 mL of Acid (0.5 M HCl)  
[53:33] Stepping pH = 4.59  
[53:48] Stirrer speed set to 0  
[54:01] Datapoint id 55 collected  
[54:01] Charge balance equation is out by -62.4%  
[54:01] Stirrer speed set to 55  
[54:06] pH 4.59 -> 4.39  
[54:06] Using cautious pH adjust  
[54:06] Dispensed 0.000047 mL of Acid (0.5 M HCl)  
[54:11] Stepping pH = 4.59  
[54:12] Dispensed 0.000141 mL of Acid (0.5 M HCl)  
[54:17] Stepping pH = 4.27

Sample name: **M08\_octanol**  
Assay name: **pH-metric high logP**  
Assay ID: **18C-02008**  
Filename: **C:\Sirius\_T3\Mehtap\20180302\_exp29\_logP\_T3-2\18C-02008\_M08\_octanol\_pH-metric high logP.t3r**

Experiment start time: **3/2/2018 6:51:30 PM**  
Analyst: **Pion**  
Instrument ID: **T312060**

## Experiment Log (continued)

[54:32] Stirrer speed set to 0  
[54:43] Datapoint id 56 collected  
[54:43] Charge balance equation is out by -100.0%  
[54:43] Stirrer speed set to 55  
[54:48] pH 4.28 -> 4.08  
[54:48] Using cautious pH adjust  
[54:48] Dispensed 0.000071 mL of Acid (0.5 M HCl)  
[54:54] Stepping pH = 4.25  
[54:54] Dispensed 0.000188 mL of Acid (0.5 M HCl)  
[54:59] Stepping pH = 3.97  
[55:14] Stirrer speed set to 0  
[55:24] Datapoint id 57 collected  
[55:24] Charge balance equation is out by -70.8%  
[55:24] Stirrer speed set to 55  
[55:29] pH 3.96 -> 3.76  
[55:29] Using cautious pH adjust  
[55:29] Dispensed 0.000141 mL of Acid (0.5 M HCl)  
[55:34] Stepping pH = 3.87  
[55:34] Dispensed 0.000118 mL of Acid (0.5 M HCl)  
[55:39] Stepping pH = 3.79  
[55:39] Dispensed 0.000047 mL of Acid (0.5 M HCl)  
[55:44] Stepping pH = 3.77  
[55:44] Dispensed 0.000024 mL of Acid (0.5 M HCl)  
[55:49] Stepping pH = 3.76  
[56:05] Stirrer speed set to 0  
[56:15] Datapoint id 58 collected  
[56:15] Charge balance equation is out by -19.0%  
[56:15] Stirrer speed set to 55  
[56:20] pH 3.76 -> 3.56  
[56:20] Using cautious pH adjust  
[56:20] Dispensed 0.000212 mL of Acid (0.5 M HCl)  
[56:25] Stepping pH = 3.63  
[56:25] Dispensed 0.000118 mL of Acid (0.5 M HCl)  
[56:30] Stepping pH = 3.59  
[56:30] Dispensed 0.000047 mL of Acid (0.5 M HCl)  
[56:35] Stepping pH = 3.57  
[56:35] Dispensed 0.000047 mL of Acid (0.5 M HCl)  
[56:40] Stepping pH = 3.56  
[56:55] Stirrer speed set to 0  
[57:06] Datapoint id 59 collected  
[57:06] Charge balance equation is out by 3.2%  
[57:06] Stirrer speed set to 55  
[57:11] pH 3.55 -> 3.35  
[57:11] Using charge balance adjust  
[57:11] Dispensed 0.000682 mL of Acid (0.5 M HCl)  
[57:31] Stirrer speed set to 0  
[57:41] Datapoint id 60 collected  
[57:41] Charge balance equation is out by 10.1%  
[57:41] Stirrer speed set to 55  
[57:46] pH 3.33 -> 3.13  
[57:46] Using charge balance adjust  
[57:46] Dispensed 0.001129 mL of Acid (0.5 M HCl)  
[58:06] Stirrer speed set to 0  
[58:16] Datapoint id 61 collected  
[58:16] Charge balance equation is out by 3.9%  
[58:16] Stirrer speed set to 55  
[58:21] pH 3.13 -> 2.93  
[58:21] Using charge balance adjust  
[58:22] Dispensed 0.001834 mL of Acid (0.5 M HCl)

Sample name: **M08\_octanol**  
Assay name: **pH-metric high logP**  
Assay ID: **18C-02008**  
Filename: **C:\Sirius\_T3\Mehtap\20180302\_exp29\_logP\_T3-2\18C-02008\_M08\_octanol\_pH-metric high logP.t3r**

Experiment start time: **3/2/2018 6:51:30 PM**  
Analyst: **Pion**  
Instrument ID: **T312060**

## Experiment Log (continued)

[58:42] Stirrer speed set to 0  
[58:52] Datapoint id 62 collected  
[58:52] Charge balance equation is out by 1.2%  
[58:52] Stirrer speed set to 55  
[58:57] pH 2.93 -> 2.73  
[58:57] Using charge balance adjust  
[58:57] Dispensed 0.002893 mL of Acid (0.5 M HCl)  
[59:17] Stirrer speed set to 0  
[59:28] Datapoint id 63 collected  
[59:28] Charge balance equation is out by 3.2%  
[59:28] Stirrer speed set to 55  
[59:33] pH 2.73 -> 2.53  
[59:33] Using charge balance adjust  
[59:33] Dispensed 0.004633 mL of Acid (0.5 M HCl)  
[59:53] Stirrer speed set to 0  
[1:00:04] Datapoint id 64 collected  
[1:00:04] Charge balance equation is out by 5.3%  
[1:00:04] Stirrer speed set to 55  
[1:00:09] pH 2.52 -> 2.32  
[1:00:09] Using charge balance adjust  
[1:00:09] Dispensed 0.007573 mL of Acid (0.5 M HCl)  
[1:00:29] Stirrer speed set to 0  
[1:00:39] Datapoint id 65 collected  
[1:00:39] Charge balance equation is out by -5.8%  
[1:00:39] Stirrer speed set to 55  
[1:00:45] pH 2.34 -> 2.14  
[1:00:45] Using charge balance adjust  
[1:00:45] Dispensed 0.011830 mL of Acid (0.5 M HCl)  
[1:01:05] Stirrer speed set to 0  
[1:01:15] Datapoint id 66 collected  
[1:01:15] Charge balance equation is out by 1.7%  
[1:01:15] Stirrer speed set to 55  
[1:01:20] pH 2.14 -> 1.95  
[1:01:20] Using charge balance adjust  
[1:01:21] Dispensed 0.017686 mL of Acid (0.5 M HCl)  
[1:01:41] Stirrer speed set to 0  
[1:01:52] Datapoint id 67 collected  
[1:01:52] Charge balance equation is out by -8.3%  
[1:01:52] Titration 3 of 3  
[1:01:52] Adding initial titrants  
[1:01:52] Automatically add 0.80000 mL of Octanol  
[1:02:42] Dispensed 0.800000 mL of Octanol  
[1:02:42] Stirrer speed set to 10  
[1:02:43] Stirrer speed set to 60  
[1:02:43] Iterative adjust 1.94 -> 10.00  
[1:02:43] pH 1.94 -> 10.00  
[1:02:44] Dispensed 0.060113 mL of Base (0.5 M KOH)  
[1:03:34] Stirrer speed set to 0  
[1:04:20] Datapoint id 68 collected  
[1:04:20] Stirrer speed set to 60  
[1:04:25] pH 10.13 -> 9.93  
[1:04:25] Using cautious pH adjust  
[1:04:25] Dispensed 0.000141 mL of Acid (0.5 M HCl)  
[1:04:30] Stepping pH = 10.07  
[1:04:30] Dispensed 0.000165 mL of Acid (0.5 M HCl)  
[1:04:35] Stepping pH = 9.92  
[1:04:50] Stirrer speed set to 0  
[1:05:28] Datapoint id 69 collected  
[1:05:28] Charge balance equation is out by -4.4%

Sample name: **M08\_octanol**  
Assay name: **pH-metric high logP**  
Assay ID: **18C-02008**  
Filename: **C:\Sirius\_T3\Mehtap\20180302\_exp29\_logP\_T3-2\18C-02008\_M08\_octanol\_pH-metric high logP.t3r**

Experiment start time: **3/2/2018 6:51:30 PM**  
Analyst: **Pion**  
Instrument ID: **T312060**

## Experiment Log (continued)

[1:05:28] Stirrer speed set to 60  
[1:05:33] pH 9.82 -> 9.62  
[1:05:33] Using charge balance adjust  
[1:05:33] Dispensed 0.000165 mL of Acid (0.5 M HCl)  
[1:05:53] Stirrer speed set to 0  
[1:06:31] Datapoint id 70 collected  
[1:06:31] Charge balance equation is out by 12.1%  
[1:06:31] Stirrer speed set to 60  
[1:06:36] pH 9.60 -> 9.40  
[1:06:36] Using charge balance adjust  
[1:06:36] Dispensed 0.000118 mL of Acid (0.5 M HCl)  
[1:06:56] Stirrer speed set to 0  
[1:07:50] Datapoint id 71 collected  
[1:07:50] Charge balance equation is out by -11.8%  
[1:07:50] Stirrer speed set to 60  
[1:07:55] pH 9.39 -> 9.19  
[1:07:55] Using charge balance adjust  
[1:07:55] Dispensed 0.000094 mL of Acid (0.5 M HCl)  
[1:08:15] Stirrer speed set to 0  
[1:08:26] Datapoint id 72 collected  
[1:08:26] Charge balance equation is out by -31.9%  
[1:08:26] Stirrer speed set to 60  
[1:08:31] pH 9.25 -> 9.05  
[1:08:31] Using cautious pH adjust  
[1:08:31] Dispensed 0.000047 mL of Acid (0.5 M HCl)  
[1:08:36] Stepping pH = 9.20  
[1:08:36] Dispensed 0.000071 mL of Acid (0.5 M HCl)  
[1:08:41] Stepping pH = 9.08  
[1:08:41] Dispensed 0.000024 mL of Acid (0.5 M HCl)  
[1:08:47] Stepping pH = 9.04  
[1:09:02] Stirrer speed set to 0  
[1:09:20] Datapoint id 73 collected  
[1:09:20] Charge balance equation is out by -49.6%  
[1:09:20] Stirrer speed set to 60  
[1:09:25] pH 9.00 -> 8.80  
[1:09:25] Using cautious pH adjust  
[1:09:25] Dispensed 0.000047 mL of Acid (0.5 M HCl)  
[1:09:30] Stepping pH = 8.94  
[1:09:30] Dispensed 0.000047 mL of Acid (0.5 M HCl)  
[1:09:35] Stepping pH = 8.86  
[1:09:35] Dispensed 0.000047 mL of Acid (0.5 M HCl)  
[1:09:40] Stepping pH = 8.78  
[1:09:55] Stirrer speed set to 0  
[1:10:15] Datapoint id 74 collected  
[1:10:15] Charge balance equation is out by -58.1%  
[1:10:15] Stirrer speed set to 60  
[1:10:20] pH 8.72 -> 8.52  
[1:10:20] Using cautious pH adjust  
[1:10:21] Dispensed 0.000071 mL of Acid (0.5 M HCl)  
[1:10:26] Stepping pH = 8.63  
[1:10:26] Dispensed 0.000047 mL of Acid (0.5 M HCl)  
[1:10:31] Stepping pH = 8.56  
[1:10:31] Dispensed 0.000024 mL of Acid (0.5 M HCl)  
[1:10:36] Stepping pH = 8.52  
[1:10:51] Stirrer speed set to 0  
[1:11:13] Datapoint id 75 collected  
[1:11:13] Charge balance equation is out by -17.8%  
[1:11:13] Stirrer speed set to 60  
[1:11:18] pH 8.50 -> 8.30



Sample name: **M08\_octanol**  
Assay name: **pH-metric high logP**  
Assay ID: **18C-02008**  
Filename: **C:\Sirius\_T3\Mehtap\20180302\_exp29\_logP\_T3-2\18C-02008\_M08\_octanol\_pH-metric high logP.t3r**

Experiment start time: **3/2/2018 6:51:30 PM**  
Analyst: **Pion**  
Instrument ID: **T312060**

## Experiment Log (continued)

[1:11:18] Using cautious pH adjust  
[1:11:18] Dispensed 0.000094 mL of Acid (0.5 M HCl)  
[1:11:23] Stepping pH = 8.39  
[1:11:23] Dispensed 0.000071 mL of Acid (0.5 M HCl)  
[1:11:28] Stepping pH = 8.31  
[1:11:28] Dispensed 0.000024 mL of Acid (0.5 M HCl)  
[1:11:33] Stepping pH = 8.29  
[1:11:48] Stirrer speed set to 0  
[1:12:09] Datapoint id 76 collected  
[1:12:09] Charge balance equation is out by 5.6%  
[1:12:09] Stirrer speed set to 60  
[1:12:14] pH 8.27 -> 8.07  
[1:12:14] Using charge balance adjust  
[1:12:14] Dispensed 0.000282 mL of Acid (0.5 M HCl)  
[1:12:34] Stirrer speed set to 0  
[1:12:58] Datapoint id 77 collected  
[1:12:58] Charge balance equation is out by 6.1%  
[1:12:58] Stirrer speed set to 60  
[1:13:04] pH 8.03 -> 7.83  
[1:13:04] Using charge balance adjust  
[1:13:04] Dispensed 0.000423 mL of Acid (0.5 M HCl)  
[1:13:24] Stirrer speed set to 0  
[1:13:46] Datapoint id 78 collected  
[1:13:46] Charge balance equation is out by -1.0%  
[1:13:46] Stirrer speed set to 60  
[1:13:51] pH 7.81 -> 7.61  
[1:13:51] Using charge balance adjust  
[1:13:51] Dispensed 0.000611 mL of Acid (0.5 M HCl)  
[1:14:11] Stirrer speed set to 0  
[1:14:32] Datapoint id 79 collected  
[1:14:32] Charge balance equation is out by -0.6%  
[1:14:32] Stirrer speed set to 60  
[1:14:37] pH 7.59 -> 7.39  
[1:14:37] Using charge balance adjust  
[1:14:38] Dispensed 0.000800 mL of Acid (0.5 M HCl)  
[1:14:58] Stirrer speed set to 0  
[1:15:25] Datapoint id 80 collected  
[1:15:25] Charge balance equation is out by -5.5%  
[1:15:25] Stirrer speed set to 60  
[1:15:30] pH 7.38 -> 7.18  
[1:15:30] Using charge balance adjust  
[1:15:31] Dispensed 0.000941 mL of Acid (0.5 M HCl)  
[1:15:51] Stirrer speed set to 0  
[1:16:15] Datapoint id 81 collected  
[1:16:15] Charge balance equation is out by -10.4%  
[1:16:15] Stirrer speed set to 60  
[1:16:20] pH 7.18 -> 6.98  
[1:16:20] Using charge balance adjust  
[1:16:21] Dispensed 0.000988 mL of Acid (0.5 M HCl)  
[1:16:41] Stirrer speed set to 0  
[1:17:03] Datapoint id 82 collected  
[1:17:03] Charge balance equation is out by -12.8%  
[1:17:03] Stirrer speed set to 60  
[1:17:08] pH 6.99 -> 6.79  
[1:17:08] Using charge balance adjust  
[1:17:08] Dispensed 0.000941 mL of Acid (0.5 M HCl)  
[1:17:28] Stirrer speed set to 0  
[1:17:57] Datapoint id 83 collected  
[1:17:57] Charge balance equation is out by -21.6%

Sample name: **M08\_octanol**  
Assay name: **pH-metric high logP**  
Assay ID: **18C-02008**  
Filename: **C:\Sirius\_T3\Mehtap\20180302\_exp29\_logP\_T3-2\18C-02008\_M08\_octanol\_pH-metric high logP.t3r**

Experiment start time: **3/2/2018 6:51:30 PM**  
Analyst: **Pion**  
Instrument ID: **T312060**

## Experiment Log (continued)

[1:17:57] Stirrer speed set to 60  
[1:18:02] pH 6.79 -> 6.59  
[1:18:02] Using cautious pH adjust  
[1:18:02] Dispensed 0.000423 mL of Acid (0.5 M HCl)  
[1:18:08] Stepping pH = 6.70  
[1:18:08] Dispensed 0.000329 mL of Acid (0.5 M HCl)  
[1:18:13] Stepping pH = 6.62  
[1:18:13] Dispensed 0.000094 mL of Acid (0.5 M HCl)  
[1:18:18] Stepping pH = 6.61  
[1:18:18] Dispensed 0.000094 mL of Acid (0.5 M HCl)  
[1:18:23] Stepping pH = 6.59  
[1:18:38] Stirrer speed set to 0  
[1:19:13] Datapoint id 84 collected  
[1:19:13] Charge balance equation is out by -11.6%  
[1:19:13] Stirrer speed set to 60  
[1:19:18] pH 6.59 -> 6.39  
[1:19:18] Using charge balance adjust  
[1:19:18] Dispensed 0.000659 mL of Acid (0.5 M HCl)  
[1:19:39] Stirrer speed set to 0  
[1:20:12] Datapoint id 85 collected  
[1:20:12] Charge balance equation is out by -31.3%  
[1:20:12] Stirrer speed set to 60  
[1:20:17] pH 6.40 -> 6.20  
[1:20:17] Using cautious pH adjust  
[1:20:17] Dispensed 0.000259 mL of Acid (0.5 M HCl)  
[1:20:22] Stepping pH = 6.31  
[1:20:22] Dispensed 0.000212 mL of Acid (0.5 M HCl)  
[1:20:27] Stepping pH = 6.23  
[1:20:27] Dispensed 0.000071 mL of Acid (0.5 M HCl)  
[1:20:32] Stepping pH = 6.21  
[1:20:32] Dispensed 0.000047 mL of Acid (0.5 M HCl)  
[1:20:37] Stepping pH = 6.20  
[1:20:53] Stirrer speed set to 0  
[1:21:18] Datapoint id 86 collected  
[1:21:18] Charge balance equation is out by -13.3%  
[1:21:18] Stirrer speed set to 60  
[1:21:23] pH 6.22 -> 6.02  
[1:21:23] Using charge balance adjust  
[1:21:23] Dispensed 0.000376 mL of Acid (0.5 M HCl)  
[1:21:43] Stirrer speed set to 0  
[1:22:08] Datapoint id 87 collected  
[1:22:08] Charge balance equation is out by -33.3%  
[1:22:08] Stirrer speed set to 60  
[1:22:13] pH 6.01 -> 5.81  
[1:22:13] Using cautious pH adjust  
[1:22:13] Dispensed 0.000118 mL of Acid (0.5 M HCl)  
[1:22:18] Stepping pH = 5.97  
[1:22:18] Dispensed 0.000212 mL of Acid (0.5 M HCl)  
[1:22:23] Stepping pH = 5.81  
[1:22:38] Stirrer speed set to 0  
[1:22:57] Datapoint id 88 collected  
[1:22:57] Charge balance equation is out by -32.4%  
[1:22:57] Stirrer speed set to 60  
[1:23:02] pH 5.82 -> 5.62  
[1:23:02] Using cautious pH adjust  
[1:23:02] Dispensed 0.000094 mL of Acid (0.5 M HCl)  
[1:23:07] Stepping pH = 5.76  
[1:23:08] Dispensed 0.000118 mL of Acid (0.5 M HCl)  
[1:23:13] Stepping pH = 5.65



Sample name: **M08\_octanol**  
Assay name: **pH-metric high logP**  
Assay ID: **18C-02008**  
Filename: **C:\Sirius\_T3\Mehtap\20180302\_exp29\_logP\_T3-2\18C-02008\_M08\_octanol\_pH-metric high logP.t3r**

Experiment start time: **3/2/2018 6:51:30 PM**  
Analyst: **Pion**  
Instrument ID: **T312060**

## Experiment Log (continued)

[1:23:13] Dispensed 0.000024 mL of Acid (0.5 M HCl)  
[1:23:18] Stepping pH = 5.63  
[1:23:18] Dispensed 0.000024 mL of Acid (0.5 M HCl)  
[1:23:23] Stepping pH = 5.62  
[1:23:38] Stirrer speed set to 0  
[1:24:02] Datapoint id 89 collected  
[1:24:02] Charge balance equation is out by -35.8%  
[1:24:02] Stirrer speed set to 60  
[1:24:07] pH 5.62 -> 5.42  
[1:24:07] Using cautious pH adjust  
[1:24:07] Dispensed 0.000047 mL of Acid (0.5 M HCl)  
[1:24:12] Stepping pH = 5.59  
[1:24:12] Dispensed 0.000118 mL of Acid (0.5 M HCl)  
[1:24:17] Stepping pH = 5.42  
[1:24:32] Stirrer speed set to 0  
[1:24:55] Datapoint id 90 collected  
[1:24:55] Charge balance equation is out by -48.7%  
[1:24:55] Stirrer speed set to 60  
[1:25:00] pH 5.41 -> 5.21  
[1:25:00] Using cautious pH adjust  
[1:25:00] Dispensed 0.000047 mL of Acid (0.5 M HCl)  
[1:25:05] Stepping pH = 5.39  
[1:25:05] Dispensed 0.000094 mL of Acid (0.5 M HCl)  
[1:25:10] Stepping pH = 5.20  
[1:25:25] Stirrer speed set to 0  
[1:25:55] Datapoint id 91 collected  
[1:25:55] Charge balance equation is out by -72.9%  
[1:25:55] Stirrer speed set to 60  
[1:26:00] pH 5.20 -> 5.00  
[1:26:00] Using cautious pH adjust  
[1:26:00] Dispensed 0.000024 mL of Acid (0.5 M HCl)  
[1:26:05] Stepping pH = 5.17  
[1:26:05] Dispensed 0.000071 mL of Acid (0.5 M HCl)  
[1:26:10] Stepping pH = 5.00  
[1:26:25] Stirrer speed set to 0  
[1:26:40] Datapoint id 92 collected  
[1:26:40] Charge balance equation is out by -79.7%  
[1:26:40] Stirrer speed set to 60  
[1:26:45] pH 4.97 -> 4.77  
[1:26:45] Using cautious pH adjust  
[1:26:45] Dispensed 0.000024 mL of Acid (0.5 M HCl)  
[1:26:50] Stepping pH = 4.97  
[1:26:50] Dispensed 0.000141 mL of Acid (0.5 M HCl)  
[1:26:55] Stepping pH = 4.59  
[1:27:10] Stirrer speed set to 0  
[1:27:22] Datapoint id 93 collected  
[1:27:22] Charge balance equation is out by -206.8%  
[1:27:22] Stirrer speed set to 60  
[1:27:27] pH 4.58 -> 4.38  
[1:27:27] Using cautious pH adjust  
[1:27:27] Dispensed 0.000047 mL of Acid (0.5 M HCl)  
[1:27:32] Stepping pH = 4.55  
[1:27:33] Dispensed 0.000094 mL of Acid (0.5 M HCl)  
[1:27:38] Stepping pH = 4.36  
[1:27:53] Stirrer speed set to 0  
[1:28:10] Datapoint id 94 collected  
[1:28:10] Charge balance equation is out by -82.7%  
[1:28:10] Stirrer speed set to 60  
[1:28:15] pH 4.35 -> 4.15

Sample name: **M08\_octanol**  
Assay name: **pH-metric high logP**  
Assay ID: **18C-02008**  
Filename: **C:\Sirius\_T3\Mehtap\20180302\_exp29\_logP\_T3-2\18C-02008\_M08\_octanol\_pH-metric high logP.t3r**

Experiment start time: **3/2/2018 6:51:30 PM**  
Analyst: **Pion**  
Instrument ID: **T312060**

## Experiment Log (continued)

[1:28:15] Using cautious pH adjust  
[1:28:15] Dispensed 0.000071 mL of Acid (0.5 M HCl)  
[1:28:20] Stepping pH = 4.29  
[1:28:20] Dispensed 0.000094 mL of Acid (0.5 M HCl)  
[1:28:25] Stepping pH = 4.17  
[1:28:25] Dispensed 0.000024 mL of Acid (0.5 M HCl)  
[1:28:30] Stepping pH = 4.15  
[1:28:45] Stirrer speed set to 0  
[1:28:56] Datapoint id 95 collected  
[1:28:56] Charge balance equation is out by -35.8%  
[1:28:56] Stirrer speed set to 60  
[1:29:01] pH 4.13 -> 3.93  
[1:29:01] Using cautious pH adjust  
[1:29:01] Dispensed 0.000094 mL of Acid (0.5 M HCl)  
[1:29:06] Stepping pH = 4.05  
[1:29:06] Dispensed 0.000094 mL of Acid (0.5 M HCl)  
[1:29:11] Stepping pH = 3.97  
[1:29:11] Dispensed 0.000047 mL of Acid (0.5 M HCl)  
[1:29:17] Stepping pH = 3.94  
[1:29:32] Stirrer speed set to 0  
[1:29:55] Datapoint id 96 collected  
[1:29:55] Charge balance equation is out by -17.3%  
[1:29:55] Stirrer speed set to 60  
[1:30:00] pH 3.92 -> 3.72  
[1:30:00] Using cautious pH adjust  
[1:30:00] Dispensed 0.000165 mL of Acid (0.5 M HCl)  
[1:30:05] Stepping pH = 3.83  
[1:30:05] Dispensed 0.000141 mL of Acid (0.5 M HCl)  
[1:30:11] Stepping pH = 3.75  
[1:30:11] Dispensed 0.000047 mL of Acid (0.5 M HCl)  
[1:30:16] Stepping pH = 3.74  
[1:30:16] Dispensed 0.000047 mL of Acid (0.5 M HCl)  
[1:30:21] Stepping pH = 3.72  
[1:30:36] Stirrer speed set to 0  
[1:30:46] Datapoint id 97 collected  
[1:30:46] Charge balance equation is out by -21.4%  
[1:30:46] Stirrer speed set to 60  
[1:30:51] pH 3.72 -> 3.52  
[1:30:51] Using cautious pH adjust  
[1:30:51] Dispensed 0.000259 mL of Acid (0.5 M HCl)  
[1:30:56] Stepping pH = 3.61  
[1:30:56] Dispensed 0.000188 mL of Acid (0.5 M HCl)  
[1:31:01] Stepping pH = 3.55  
[1:31:02] Dispensed 0.000094 mL of Acid (0.5 M HCl)  
[1:31:07] Stepping pH = 3.53  
[1:31:07] Dispensed 0.000047 mL of Acid (0.5 M HCl)  
[1:31:12] Stepping pH = 3.52  
[1:31:27] Stirrer speed set to 0  
[1:31:37] Datapoint id 98 collected  
[1:31:37] Charge balance equation is out by -13.3%  
[1:31:37] Stirrer speed set to 60  
[1:31:42] pH 3.52 -> 3.32  
[1:31:42] Using charge balance adjust  
[1:31:42] Dispensed 0.000800 mL of Acid (0.5 M HCl)  
[1:32:02] Stirrer speed set to 0  
[1:32:12] Datapoint id 99 collected  
[1:32:12] Charge balance equation is out by -0.9%  
[1:32:12] Stirrer speed set to 60  
[1:32:18] pH 3.32 -> 3.12

Sample name: **M08\_octanol**  
Assay name: **pH-metric high logP**  
Assay ID: **18C-02008**  
Filename: **C:\Sirius\_T3\Mehtap\20180302\_exp29\_logP\_T3-2\18C-02008\_M08\_octanol\_pH-metric high logP.t3r**

Experiment start time: **3/2/2018 6:51:30 PM**  
Analyst: **Pion**  
Instrument ID: **T312060**

## Experiment Log (continued)

[1:32:18] Using charge balance adjust  
[1:32:18] Dispensed 0.001246 mL of Acid (0.5 M HCl)  
[1:32:38] Stirrer speed set to 0  
[1:32:48] Datapoint id 100 collected  
[1:32:48] Charge balance equation is out by -4.4%  
[1:32:48] Stirrer speed set to 60  
[1:32:53] pH 3.14 -> 2.94  
[1:32:53] Using charge balance adjust  
[1:32:54] Dispensed 0.001929 mL of Acid (0.5 M HCl)  
[1:33:14] Stirrer speed set to 0  
[1:33:37] Datapoint id 101 collected  
[1:33:37] Charge balance equation is out by -0.5%  
[1:33:37] Stirrer speed set to 60  
[1:33:42] pH 2.94 -> 2.74  
[1:33:42] Using charge balance adjust  
[1:33:43] Dispensed 0.003010 mL of Acid (0.5 M HCl)  
[1:34:03] Stirrer speed set to 0  
[1:34:13] Datapoint id 102 collected  
[1:34:13] Charge balance equation is out by 1.9%  
[1:34:13] Stirrer speed set to 60  
[1:34:18] pH 2.74 -> 2.54  
[1:34:18] Using charge balance adjust  
[1:34:18] Dispensed 0.004845 mL of Acid (0.5 M HCl)  
[1:34:38] Stirrer speed set to 0  
[1:34:49] Datapoint id 103 collected  
[1:34:49] Charge balance equation is out by 1.5%  
[1:34:49] Stirrer speed set to 60  
[1:34:54] pH 2.54 -> 2.34  
[1:34:54] Using charge balance adjust  
[1:34:54] Dispensed 0.007785 mL of Acid (0.5 M HCl)  
[1:35:15] Stirrer speed set to 0  
[1:35:30] Datapoint id 104 collected  
[1:35:30] Charge balance equation is out by -0.7%  
[1:35:30] Stirrer speed set to 60  
[1:35:35] pH 2.35 -> 2.15  
[1:35:35] Using charge balance adjust  
[1:35:35] Dispensed 0.012371 mL of Acid (0.5 M HCl)  
[1:35:55] Stirrer speed set to 0  
[1:36:09] Datapoint id 105 collected  
[1:36:09] Charge balance equation is out by -0.3%  
[1:36:09] Stirrer speed set to 60  
[1:36:14] pH 2.15 -> 1.95  
[1:36:14] Using charge balance adjust  
[1:36:14] Dispensed 0.019920 mL of Acid (0.5 M HCl)  
[1:36:35] Stirrer speed set to 0  
[1:36:55] Datapoint id 106 collected  
[1:36:55] Charge balance equation is out by 1.4%  
[1:36:55] Argon flow rate set to 0  
[1:36:59] Titrator arm moved over Titration position
