# Supplementary material for: Octanol-water partition coefficient measurements for the SAMPL6 Blind Prediction Challenge
Source: bioRxiv or medRxiv preprint supplement (doi:10.1101/757393), 2019-12-02
Supplement: Supplementary file [file media-2.zip]

Sample name: **M13\_octanol**  
 Assay name: **pH-metric high logP**  
 Assay ID: **18C-09011**  
 Filename: **C:\Sirius\_T3\Mehtap\20180309\_exp31\_logP\_T3-2\18C-09011\_M13\_octanol\_pH-metric high logP.t3r**

Experiment start time: **3/9/2018 5:12:57 PM**  
 Analyst: **Pion**  
 Instrument ID: **T312060**

## pH-metric Result

logP (XH +) -4.95 ±1.76 (n=49)  
 logP (neutral X) 2.87 ±0.01 (n=49)  
 RMSD 0.236

### 18C-09011 Points 2 to 18

M13\_octanol concentration factor 0.835  
 Carbonate 0.0000 mM  
 Acidity error 3.14531 mM

### 18C-09011 Points 19 to 34

M13\_octanol concentration factor 0.903  
 Carbonate 0.0000 mM  
 Acidity error 3.32532 mM

### 18C-09011 Points 35 to 65

M13\_octanol concentration factor 0.690  
 Carbonate 0.2248 mM  
 Acidity error 3.00531 mM

## Warnings and errors

Errors None  
 Warnings One or more logP values out of range

## Sample logD and percent species

| pH     | M13_octanol<br>logD | M13_octanol<br>M13_octanolH | M13_octanol<br>M13_octanol | M13_octanol<br>M13_octanolH* | M13_octanol<br>M13_octanol* | Comment    |
|--------|---------------------|-----------------------------|----------------------------|------------------------------|-----------------------------|------------|
| 1.000  | -1.90               | 98.76 %                     | 0.00 %                     | 0.00 %                       | 1.24 %                      | Stomach pH |
| 1.200  | -1.70               | 98.05 %                     | 0.00 %                     | 0.00 %                       | 1.95 %                      |            |
| 2.000  | -0.90               | 88.86 %                     | 0.02 %                     | 0.00 %                       | 11.13 %                     |            |
| 3.000  | 0.10                | 44.37 %                     | 0.08 %                     | 0.00 %                       | 55.56 %                     |            |
| 4.000  | 1.09                | 7.39 %                      | 0.13 %                     | 0.00 %                       | 92.49 %                     |            |
| 5.000  | 2.03                | 0.79 %                      | 0.13 %                     | 0.00 %                       | 99.07 %                     | Blood pH   |
| 6.000  | 2.67                | 0.08 %                      | 0.14 %                     | 0.00 %                       | 99.78 %                     |            |
| 6.500  | 2.79                | 0.03 %                      | 0.14 %                     | 0.00 %                       | 99.84 %                     |            |
| 7.000  | 2.84                | 0.01 %                      | 0.14 %                     | 0.00 %                       | 99.86 %                     |            |
| 7.400  | 2.86                | 0.00 %                      | 0.14 %                     | 0.00 %                       | 99.86 %                     |            |
| 8.000  | 2.87                | 0.00 %                      | 0.14 %                     | 0.00 %                       | 99.86 %                     |            |
| 9.000  | 2.87                | 0.00 %                      | 0.14 %                     | 0.00 %                       | 99.86 %                     |            |
| 10.000 | 2.87                | 0.00 %                      | 0.14 %                     | 0.00 %                       | 99.86 %                     |            |
| 11.000 | 2.87                | 0.00 %                      | 0.14 %                     | 0.00 %                       | 99.86 %                     |            |
| 12.000 | 2.87                | 0.00 %                      | 0.14 %                     | 0.00 %                       | 99.86 %                     |            |

Sample name: **M13\_octanol**  
 Assay name: **pH-metric high logP**  
 Assay ID: **18C-09011**  
 Filename: **C:\Sirius\_T3\Mehtap\20180309\_exp31\_logP\_T3-2\18C-09011\_M13\_octanol\_pH-metric high logP.t3r**

Experiment start time: **3/9/2018 5:12:57 PM**  
 Analyst: **Pion**  
 Instrument ID: **T312060**

## Graphs

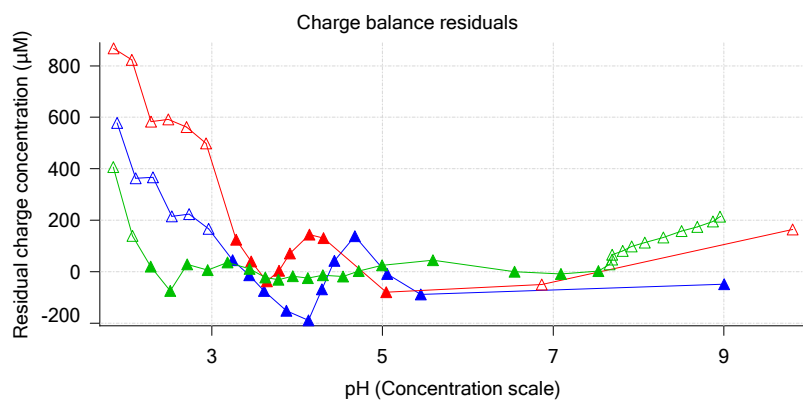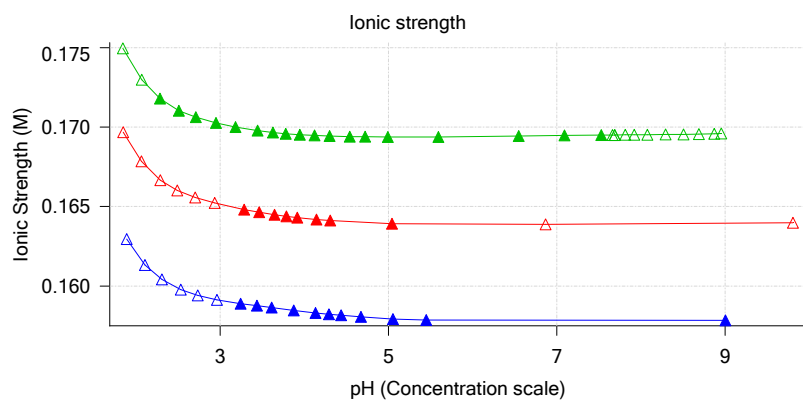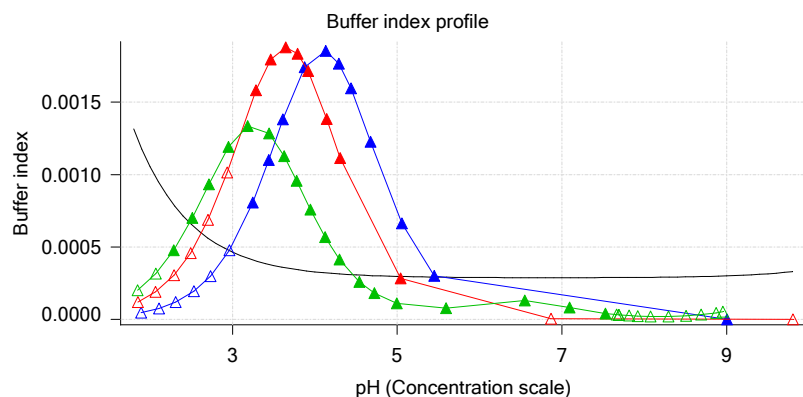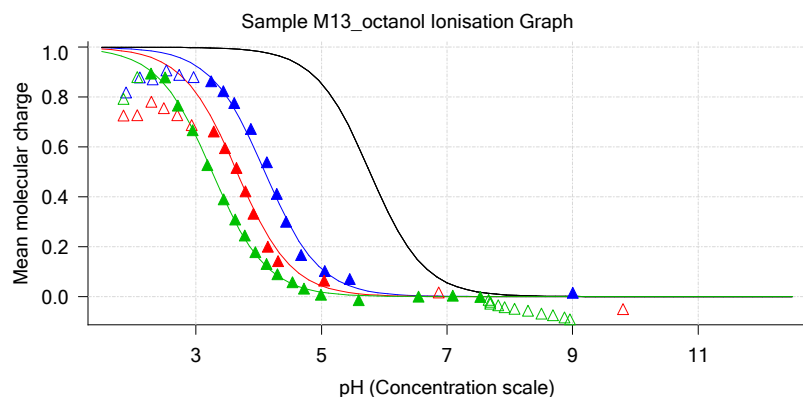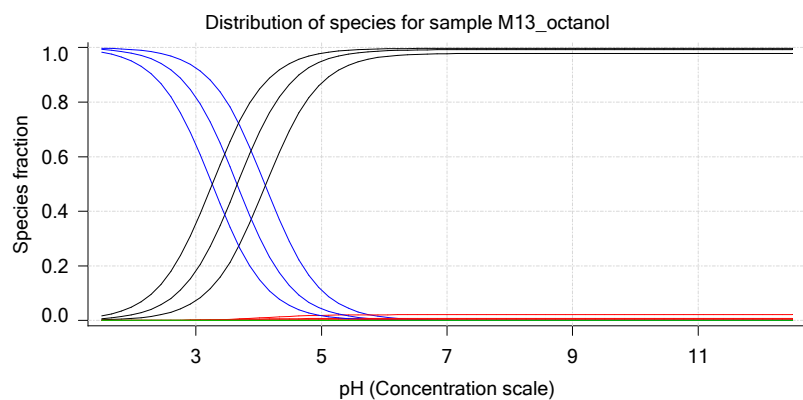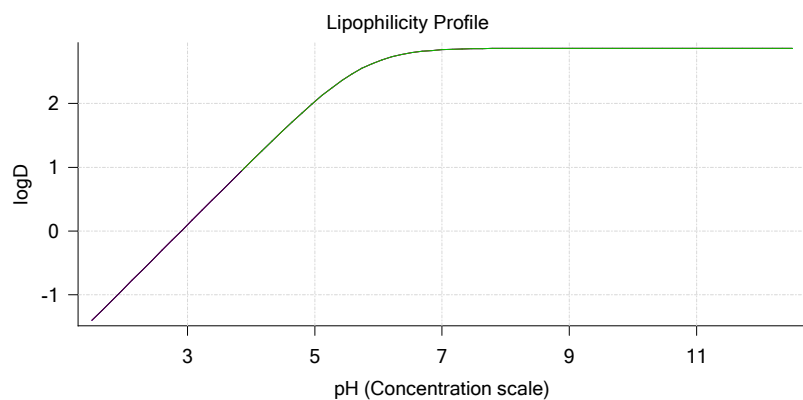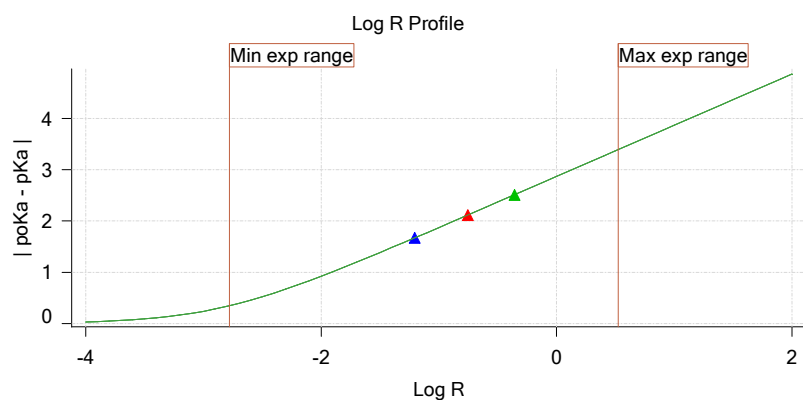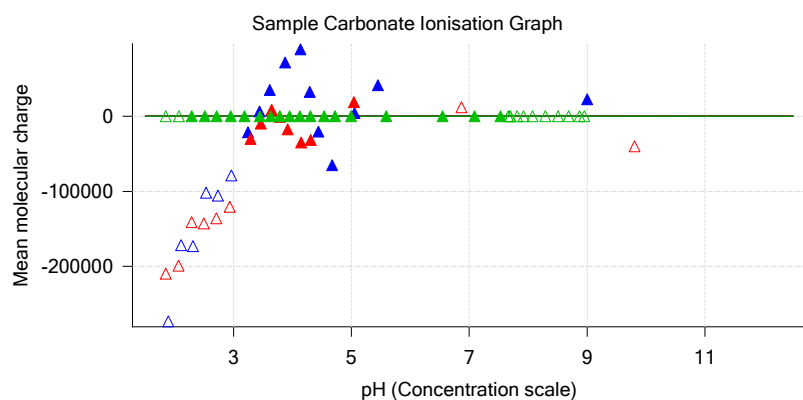

|              |                                                                                                   |                        |                            |
|--------------|---------------------------------------------------------------------------------------------------|------------------------|----------------------------|
| Sample name: | <b>M13_octanol</b>                                                                                | Experiment start time: | <b>3/9/2018 5:12:57 PM</b> |
| Assay name:  | <b>pH-metric high logP</b>                                                                        | Analyst:               | <b>Pion</b>                |
| Assay ID:    | <b>18C-09011</b>                                                                                  | Instrument ID:         | <b>T312060</b>             |
| Filename:    | <b>C:\Sirius_T3\Mehtap\20180309_exp31_logP_T3-2\18C-09011_M13_octanol_pH-metric high logP.t3r</b> |                        |                            |

## Graphs (continued)

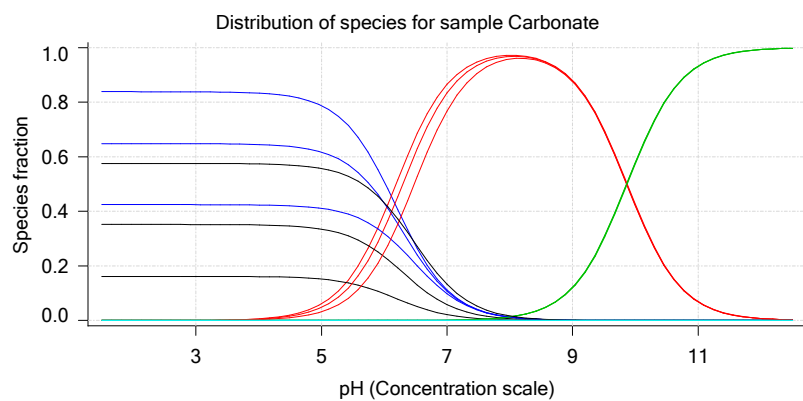

Sample name: **M13\_octanol**  
 Assay name: **pH-metric high logP**  
 Assay ID: **18C-09011**  
 Filename: **C:\Sirius\_T3\Mehtap\20180309\_exp31\_logP\_T3-2\18C-09011\_M13\_octanol\_pH-metric high logP.t3r**

Experiment start time: **3/9/2018 5:12:57 PM**  
 Analyst: **Pion**  
 Instrument ID: **T312060**

## pH-metric high logP Titration 1 of 3 18C-09011 Points 2 to 18

### Overall results

RMSD 0.383  
 Average ionic strength 0.158 M  
 Average temperature 24.9°C  
 Partition ratio 0.0624 : 1  
 Analyte concentration range 3623.6 µM to 3730.0 µM  
 Total points considered 11 of 17

### Warnings and errors

Errors None  
 Warnings One or more logP values out of range  
 Excessive acidity error present

### Four-Plus parameters

Alpha 0.102 3/9/2018 5:12:57 PM C:\Sirius\_T3\HCl18C09.t3r  
 S 0.9967 3/9/2018 5:12:57 PM C:\Sirius\_T3\HCl18C09.t3r  
 jH 1.2 3/9/2018 5:12:57 PM C:\Sirius\_T3\HCl18C09.t3r  
 jOH 0.0 3/9/2018 5:12:57 PM C:\Sirius\_T3\HCl18C09.t3r

### Titrants

0.50 M HCl 0.999843 3/9/2018 5:12:57 PM C:\Sirius\_T3\HCl18C09.t3r  
 0.50 M KOH 0.999845 3/9/2018 5:12:57 PM C:\Sirius\_T3\KOH18B27.t3r

### Sample

M13\_octanol concentration factor 0.835  
 Base pKa 1 5.77  
 logP (XH +) -4.56  
 logP (neutral X) 2.83

### Sample graphs

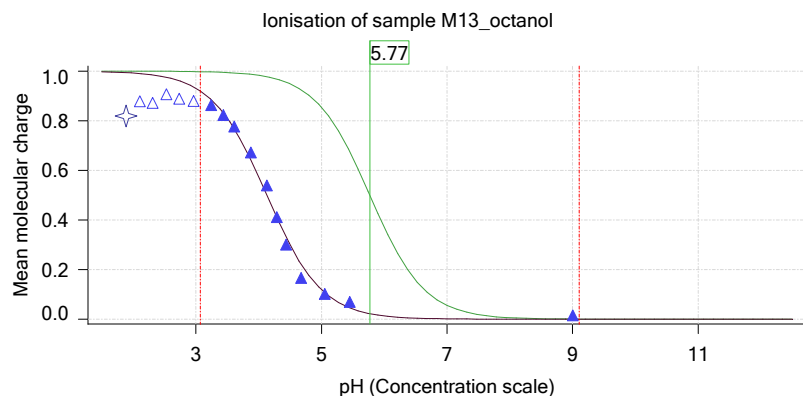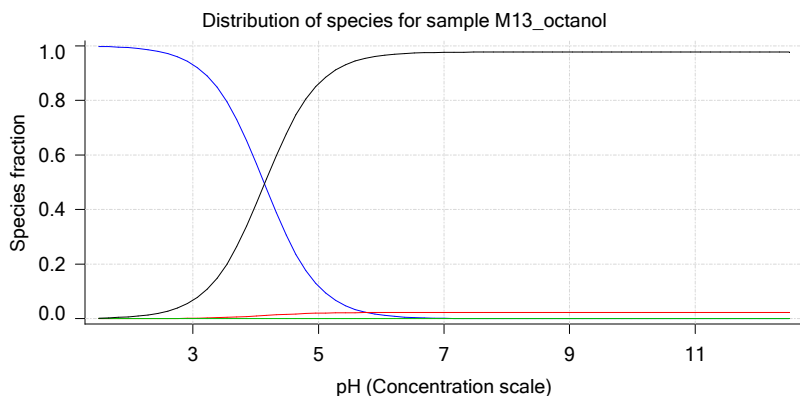

Sample name: **M13\_octanol**  
 Assay name: **pH-metric high logP**  
 Assay ID: **18C-09011**  
 Filename: **C:\Sirius\_T3\Mehtap\20180309\_exp31\_logP\_T3-2\18C-09011\_M13\_octanol\_pH-metric high logP.t3r**

Experiment start time: **3/9/2018 5:12:57 PM**  
 Analyst: **Pion**  
 Instrument ID: **T312060**

## Sample graphs (continued)

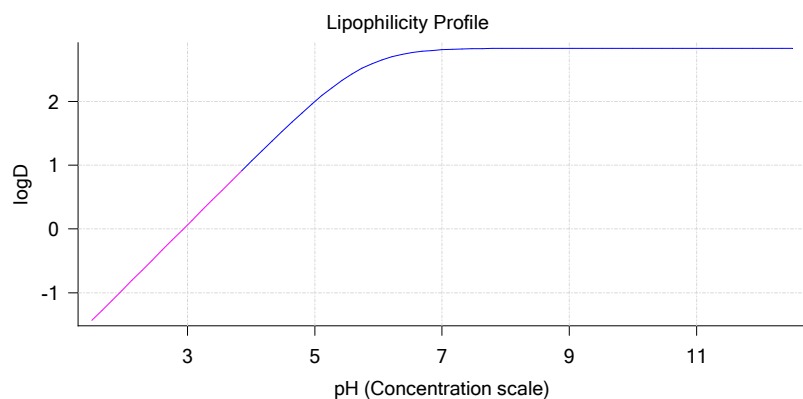

## Sample logD and percent species

| pH     | M13_octanol<br>logD | M13_octanol<br>M13_octanolH | M13_octanol<br>M13_octanolH | M13_octanol<br>M13_octanolH* | M13_octanol<br>M13_octanol* | Comment    |
|--------|---------------------|-----------------------------|-----------------------------|------------------------------|-----------------------------|------------|
| 1.000  | -1.94               | 99.93 %                     | 0.00 %                      | 0.00 %                       | 0.07 %                      | Stomach pH |
| 1.200  | -1.74               | 99.88 %                     | 0.00 %                      | 0.00 %                       | 0.11 %                      |            |
| 2.000  | -0.94               | 99.27 %                     | 0.02 %                      | 0.00 %                       | 0.72 %                      |            |
| 3.000  | 0.06                | 93.11 %                     | 0.16 %                      | 0.00 %                       | 6.73 %                      |            |
| 4.000  | 1.06                | 57.49 %                     | 0.98 %                      | 0.00 %                       | 41.53 %                     |            |
| 5.000  | 2.00                | 11.91 %                     | 2.02 %                      | 0.00 %                       | 86.06 %                     | Blood pH   |
| 6.000  | 2.63                | 1.33 %                      | 2.27 %                      | 0.00 %                       | 96.40 %                     |            |
| 6.500  | 2.76                | 0.43 %                      | 2.29 %                      | 0.00 %                       | 97.29 %                     |            |
| 7.000  | 2.81                | 0.14 %                      | 2.29 %                      | 0.00 %                       | 97.57 %                     |            |
| 7.400  | 2.82                | 0.05 %                      | 2.30 %                      | 0.00 %                       | 97.65 %                     |            |
| 8.000  | 2.83                | 0.01 %                      | 2.30 %                      | 0.00 %                       | 97.69 %                     |            |
| 9.000  | 2.83                | 0.00 %                      | 2.30 %                      | 0.00 %                       | 97.70 %                     |            |
| 10.000 | 2.83                | 0.00 %                      | 2.30 %                      | 0.00 %                       | 97.70 %                     |            |
| 11.000 | 2.83                | 0.00 %                      | 2.30 %                      | 0.00 %                       | 97.70 %                     |            |
| 12.000 | 2.83                | 0.00 %                      | 2.30 %                      | 0.00 %                       | 97.70 %                     |            |

## Carbonate and acidity

Carbonate 0.000 mM  
 Acidity error 3.145 mM

## Other graphs

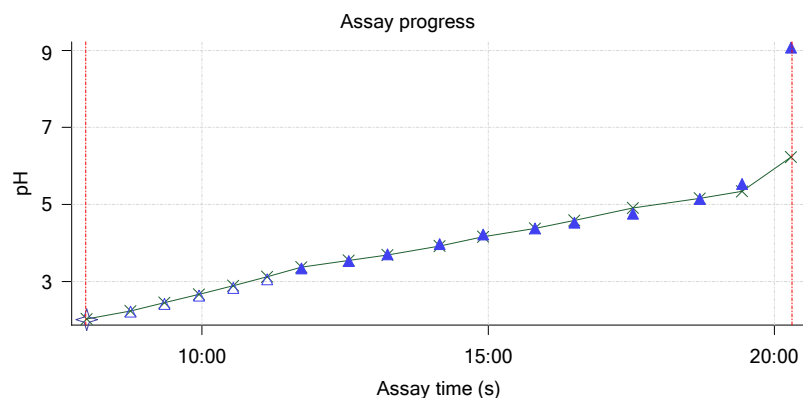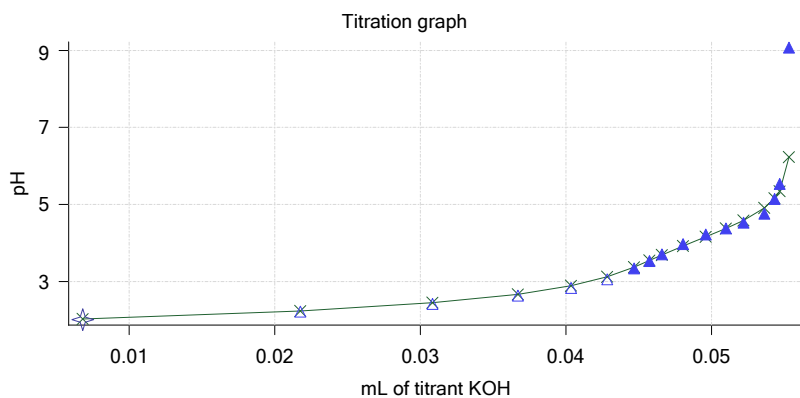

Sample name: **M13\_octanol**  
 Assay name: **pH-metric high logP**  
 Assay ID: **18C-09011**  
 Filename: **C:\Sirius\_T3\Mehtap\20180309\_exp31\_logP\_T3-2\18C-09011\_M13\_octanol\_pH-metric high logP.t3r**

Experiment start time: **3/9/2018 5:12:57 PM**  
 Analyst: **Pion**  
 Instrument ID: **T312060**

## Other graphs (continued)

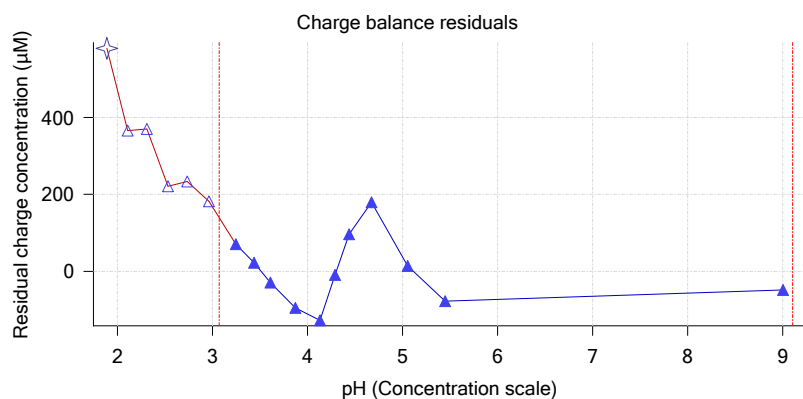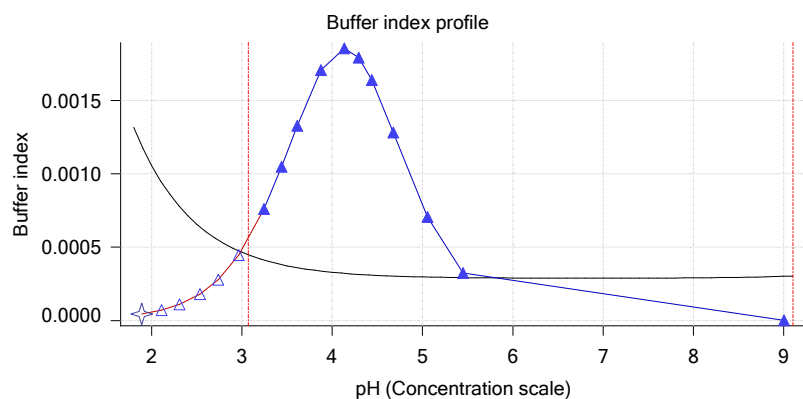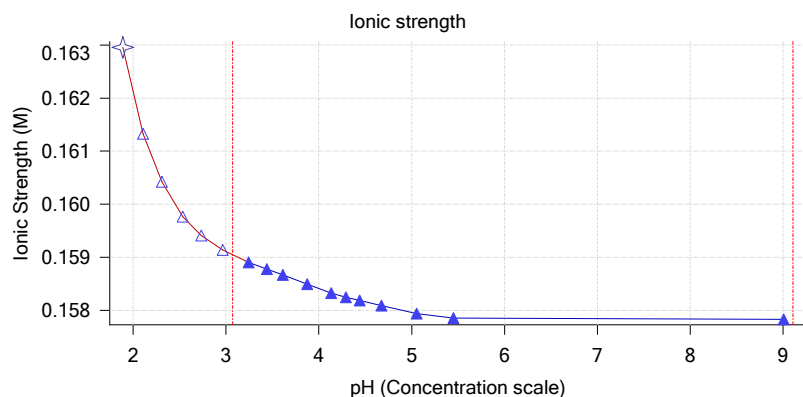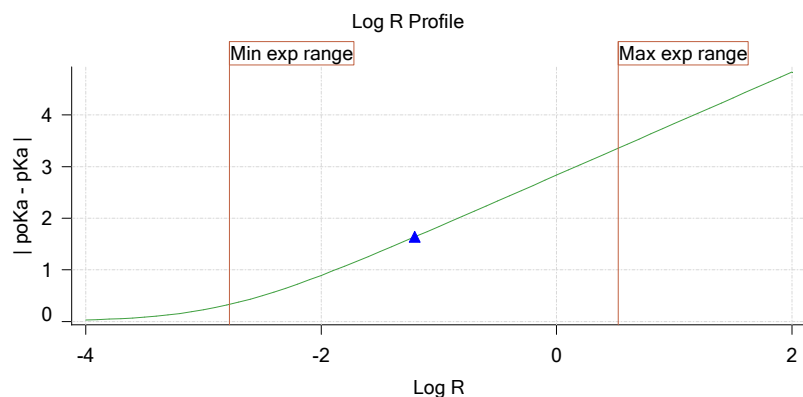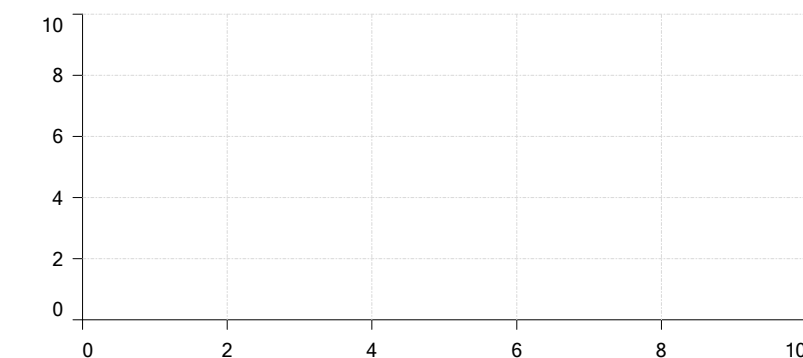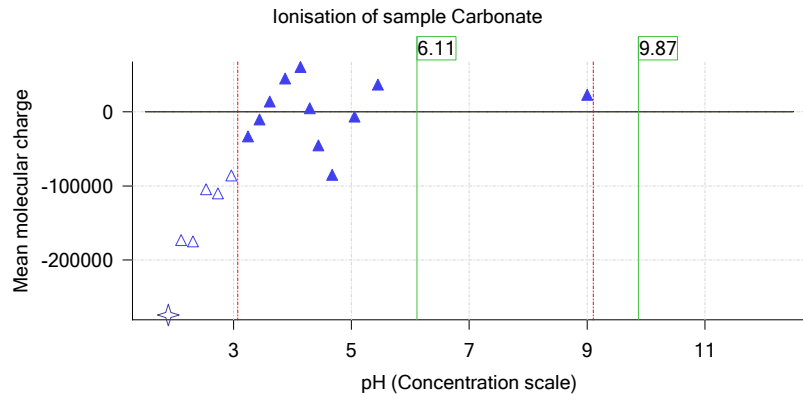

Sample name: **M13\_octanol**  
 Assay name: **pH-metric high logP**  
 Assay ID: **18C-09011**  
 Filename: **C:\Sirius\_T3\Mehtap\20180309\_exp31\_logP\_T3-2\18C-09011\_M13\_octanol\_pH-metric high logP.t3r**

Experiment start time: **3/9/2018 5:12:57 PM**  
 Analyst: **Pion**  
 Instrument ID: **T312060**

pH-metric high logP Titration 2 of 3 18C-09011 Points 19 to 34

## Overall results

RMSD 0.118  
 Average ionic strength 0.164 M  
 Average temperature 24.9°C  
 Partition ratio 0.1757 : 1  
 Analyte concentration range 3064.9 µM to 3153.0 µM  
 Total points considered 8 of 16

## Warnings and errors

Errors None  
 Warnings One or more logP values out of range  
 Excessive acidity error present

## Four-Plus parameters

Alpha 0.102 3/9/2018 5:12:57 PM C:\Sirius\_T3\HCl18C09.t3r  
 S 0.9967 3/9/2018 5:12:57 PM C:\Sirius\_T3\HCl18C09.t3r  
 jH 1.2 3/9/2018 5:12:57 PM C:\Sirius\_T3\HCl18C09.t3r  
 jOH 0.0 3/9/2018 5:12:57 PM C:\Sirius\_T3\HCl18C09.t3r

## Titrants

0.50 M HCl 0.999843 3/9/2018 5:12:57 PM C:\Sirius\_T3\HCl18C09.t3r  
 0.50 M KOH 0.999845 3/9/2018 5:12:57 PM C:\Sirius\_T3\KOH18B27.t3r

## Sample

M13\_octanol concentration factor 0.903  
 Base pKa 1 5.77  
 logP (XH +) -4.56  
 logP (neutral X) 2.90

## Sample graphs

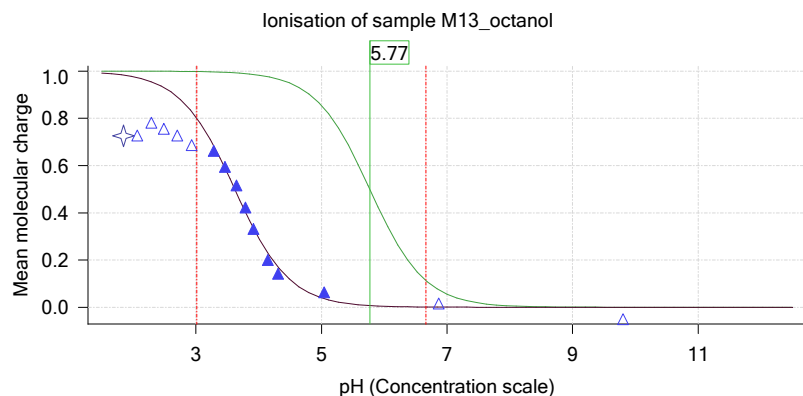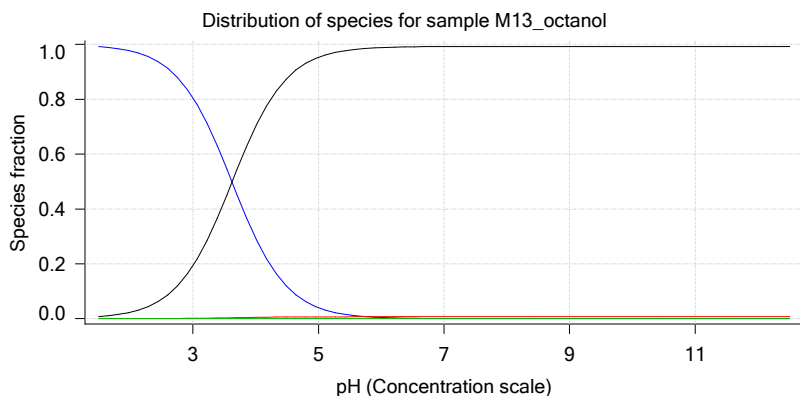

Sample name: **M13\_octanol**  
 Assay name: **pH-metric high logP**  
 Assay ID: **18C-09011**  
 Filename: **C:\Sirius\_T3\Mehtap\20180309\_exp31\_logP\_T3-2\18C-09011\_M13\_octanol\_pH-metric high logP.t3r**

Experiment start time: **3/9/2018 5:12:57 PM**  
 Analyst: **Pion**  
 Instrument ID: **T312060**

## Sample graphs (continued)

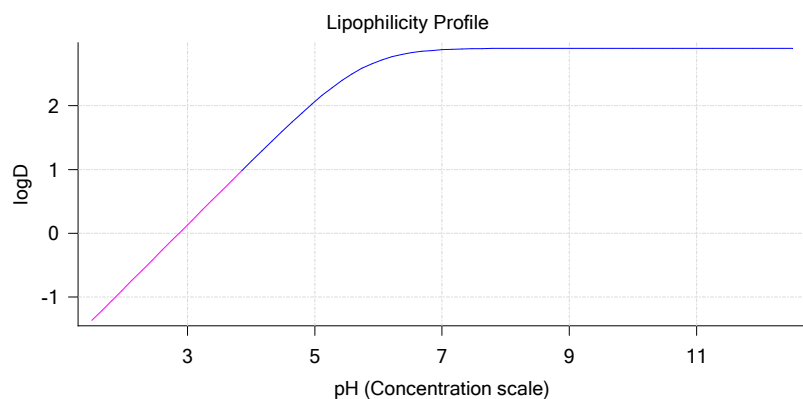

## Sample logD and percent species

| pH     | M13_octanol<br>logD | M13_octanol<br>M13_octanolH | M13_octanol<br>M13_octanolH | M13_octanol<br>M13_octanolH* | M13_octanol<br>M13_octanol* | Comment    |
|--------|---------------------|-----------------------------|-----------------------------|------------------------------|-----------------------------|------------|
| 1.000  | -1.87               | 99.76 %                     | 0.00 %                      | 0.00 %                       | 0.24 %                      | Stomach pH |
| 1.200  | -1.67               | 99.62 %                     | 0.00 %                      | 0.00 %                       | 0.38 %                      |            |
| 2.000  | -0.87               | 97.66 %                     | 0.02 %                      | 0.00 %                       | 2.33 %                      |            |
| 3.000  | 0.13                | 80.65 %                     | 0.14 %                      | 0.00 %                       | 19.21 %                     |            |
| 4.000  | 1.13                | 29.42 %                     | 0.50 %                      | 0.00 %                       | 70.08 %                     |            |
| 5.000  | 2.06                | 4.00 %                      | 0.68 %                      | 0.00 %                       | 95.32 %                     | Blood pH   |
| 6.000  | 2.70                | 0.42 %                      | 0.70 %                      | 0.00 %                       | 98.88 %                     |            |
| 6.500  | 2.83                | 0.13 %                      | 0.71 %                      | 0.00 %                       | 99.16 %                     |            |
| 7.000  | 2.88                | 0.04 %                      | 0.71 %                      | 0.00 %                       | 99.25 %                     |            |
| 7.400  | 2.89                | 0.02 %                      | 0.71 %                      | 0.00 %                       | 99.28 %                     |            |
| 8.000  | 2.90                | 0.00 %                      | 0.71 %                      | 0.00 %                       | 99.29 %                     |            |
| 9.000  | 2.90                | 0.00 %                      | 0.71 %                      | 0.00 %                       | 99.29 %                     |            |
| 10.000 | 2.90                | 0.00 %                      | 0.71 %                      | 0.00 %                       | 99.29 %                     |            |
| 11.000 | 2.90                | 0.00 %                      | 0.71 %                      | 0.00 %                       | 99.29 %                     |            |
| 12.000 | 2.90                | 0.00 %                      | 0.71 %                      | 0.00 %                       | 99.29 %                     |            |

## Carbonate and acidity

Carbonate 0.000 mM  
 Acidity error 3.325 mM

## Other graphs

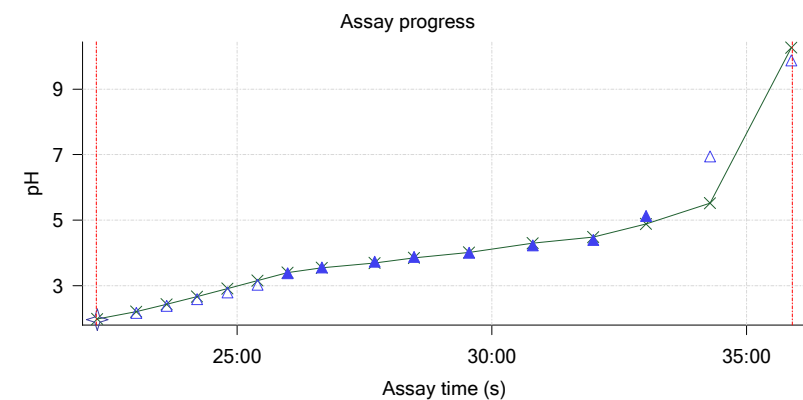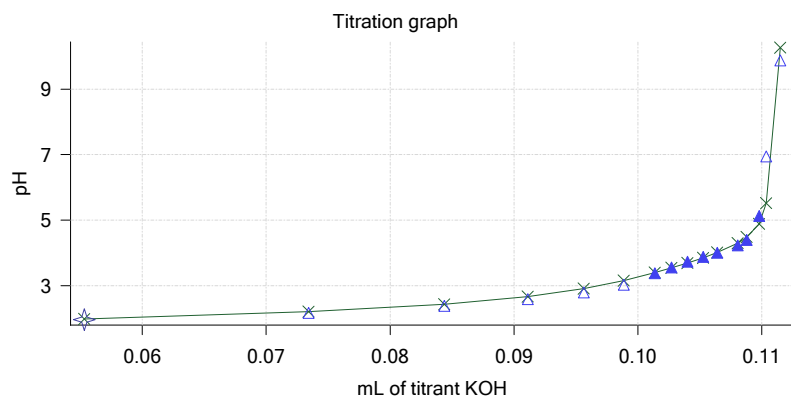



Sample name: **M13\_octanol**  
 Assay name: **pH-metric high logP**  
 Assay ID: **18C-09011**  
 Filename: **C:\Sirius\_T3\Mehtap\20180309\_exp31\_logP\_T3-2\18C-09011\_M13\_octanol\_pH-metric high logP.t3r**

Experiment start time: **3/9/2018 5:12:57 PM**  
 Analyst: **Pion**  
 Instrument ID: **T312060**

## Other graphs (continued)

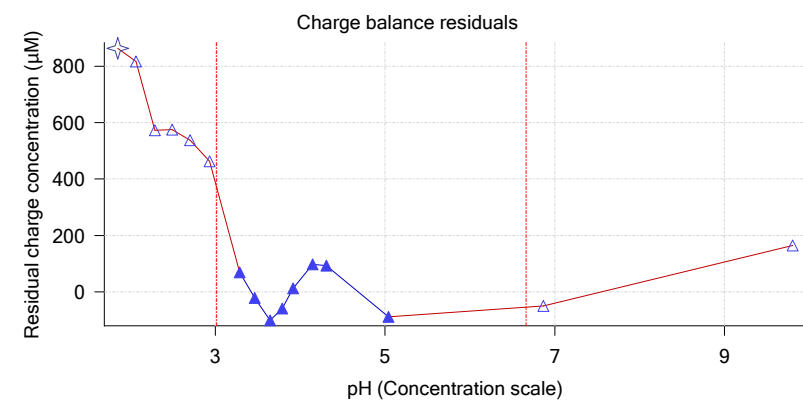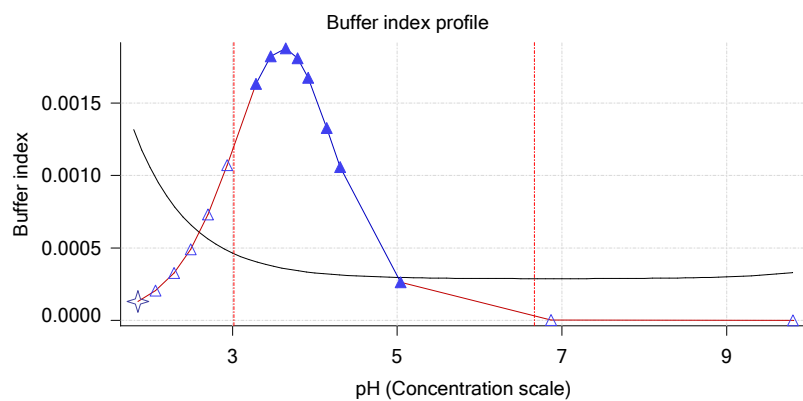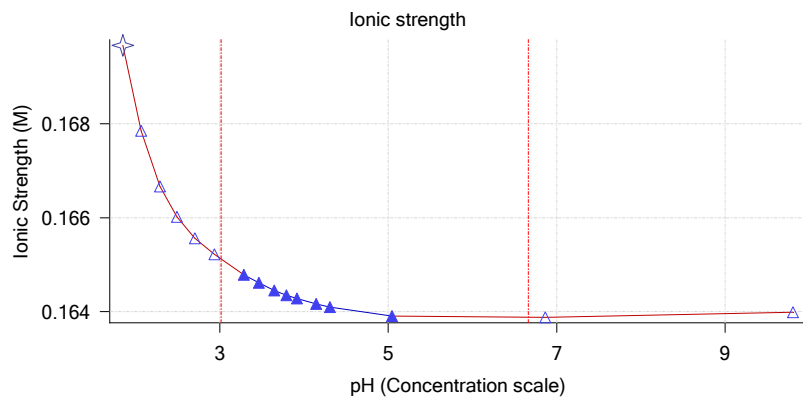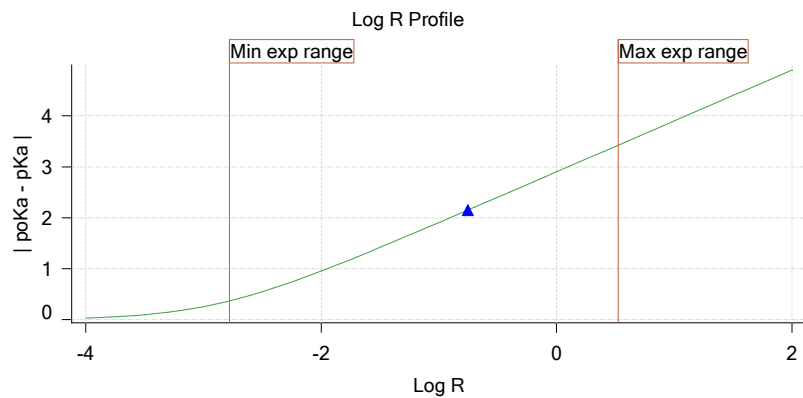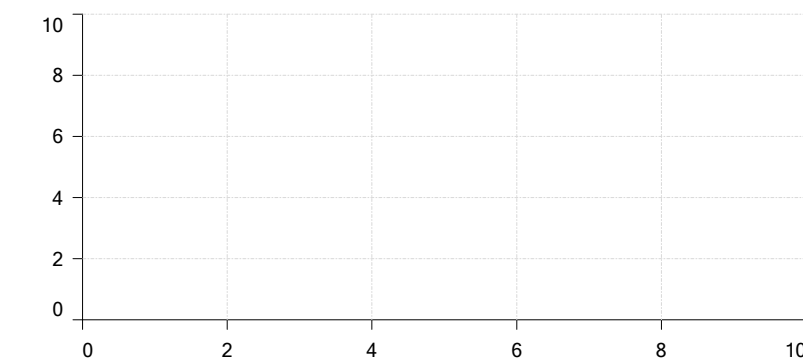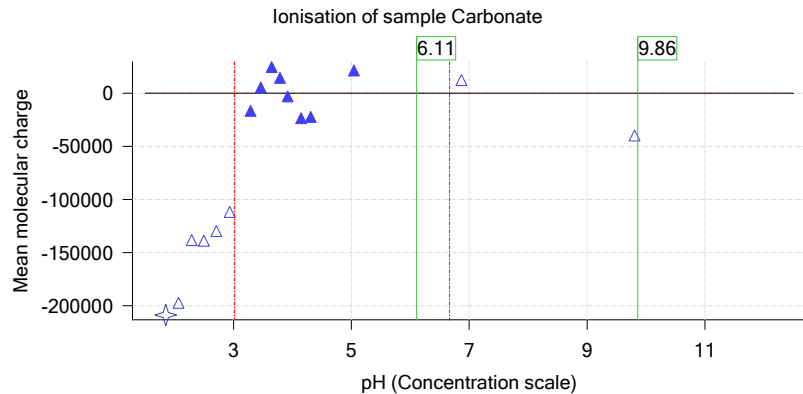

Sample name: **M13\_octanol**  
 Assay name: **pH-metric high logP**  
 Assay ID: **18C-09011**  
 Filename: **C:\Sirius\_T3\Mehtap\20180309\_exp31\_logP\_T3-2\18C-09011\_M13\_octanol\_pH-metric high logP.t3r**

Experiment start time: **3/9/2018 5:12:57 PM**  
 Analyst: **Pion**  
 Instrument ID: **T312060**

pH-metric high logP Titration 3 of 3 18C-09011 Points 35 to 65

## Overall results

RMSD 0.137  
 Average ionic strength 0.170 M  
 Average temperature 25.0°C  
 Partition ratio 0.4387 : 1  
 Analyte concentration range 2344.1 µM to 2398.3 µM  
 Total points considered 18 of 31

## Warnings and errors

Errors None  
 Warnings Sample concentration factor out of range  
 One or more logP values out of range  
 Excessive acidity error present

## Four-Plus parameters

Alpha 0.102 3/9/2018 5:12:57 PM C:\Sirius\_T3\HCl18C09.t3r  
 S 0.9967 3/9/2018 5:12:57 PM C:\Sirius\_T3\HCl18C09.t3r  
 jH 1.2 3/9/2018 5:12:57 PM C:\Sirius\_T3\HCl18C09.t3r  
 jOH 0.0 3/9/2018 5:12:57 PM C:\Sirius\_T3\HCl18C09.t3r

## Titrants

0.50 M HCl 0.999843 3/9/2018 5:12:57 PM C:\Sirius\_T3\HCl18C09.t3r  
 0.50 M KOH 0.999845 3/9/2018 5:12:57 PM C:\Sirius\_T3\KOH18B27.t3r

## Sample

M13\_octanol concentration factor 0.690  
 Base pKa 1 5.77  
 logP (XH +) -4.56  
 logP (neutral X) 2.86

## Sample graphs

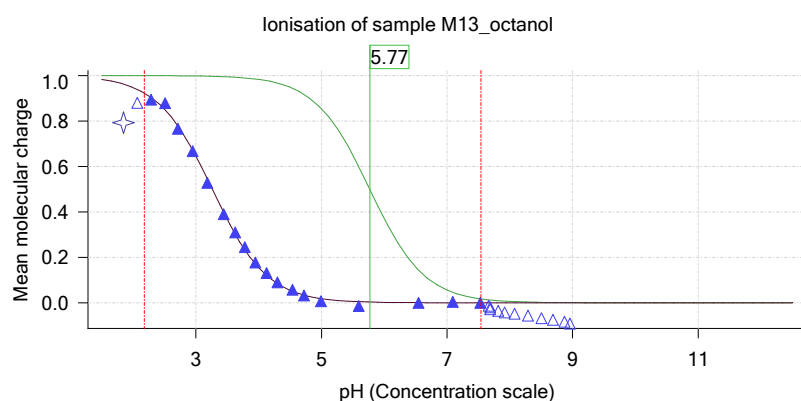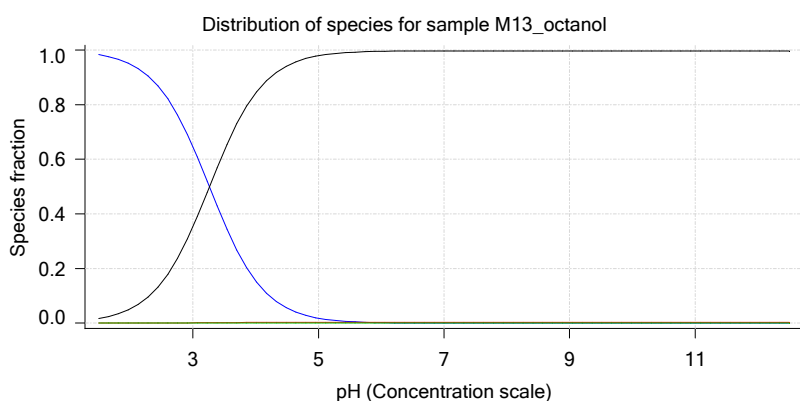

Sample name: **M13\_octanol**  
 Assay name: **pH-metric high logP**  
 Assay ID: **18C-09011**  
 Filename: **C:\Sirius\_T3\Mehtap\20180309\_exp31\_logP\_T3-2\18C-09011\_M13\_octanol\_pH-metric high logP.t3r**

Experiment start time: **3/9/2018 5:12:57 PM**  
 Analyst: **Pion**  
 Instrument ID: **T312060**

## Sample graphs (continued)

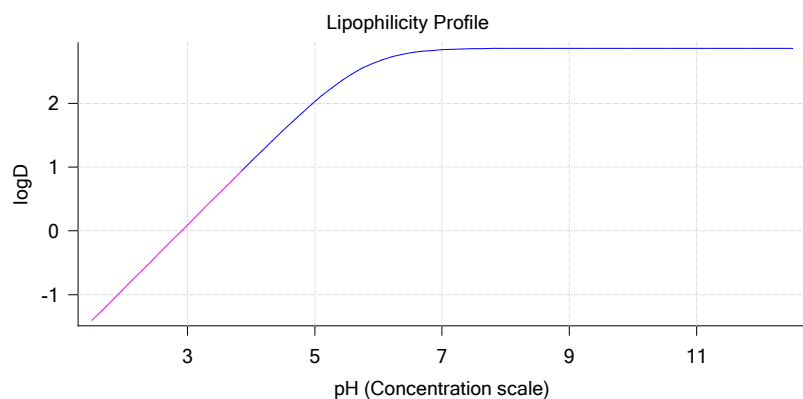

## Sample logD and percent species

| pH     | M13_octanol<br>logD | M13_octanol<br>M13_octanolH | M13_octanol<br>M13_octanolH | M13_octanol<br>M13_octanolH* | M13_octanol<br>M13_octanol* | Comment    |
|--------|---------------------|-----------------------------|-----------------------------|------------------------------|-----------------------------|------------|
| 1.000  | -1.90               | 99.46 %                     | 0.00 %                      | 0.00 %                       | 0.54 %                      | Stomach pH |
| 1.200  | -1.71               | 99.14 %                     | 0.00 %                      | 0.00 %                       | 0.86 %                      |            |
| 2.000  | -0.91               | 94.82 %                     | 0.02 %                      | 0.00 %                       | 5.17 %                      |            |
| 3.000  | 0.09                | 64.66 %                     | 0.11 %                      | 0.00 %                       | 35.23 %                     |            |
| 4.000  | 1.09                | 15.47 %                     | 0.26 %                      | 0.00 %                       | 84.27 %                     |            |
| 5.000  | 2.03                | 1.80 %                      | 0.31 %                      | 0.00 %                       | 97.90 %                     | Blood pH   |
| 6.000  | 2.66                | 0.18 %                      | 0.31 %                      | 0.00 %                       | 99.51 %                     |            |
| 6.500  | 2.79                | 0.06 %                      | 0.31 %                      | 0.00 %                       | 99.63 %                     |            |
| 7.000  | 2.84                | 0.02 %                      | 0.31 %                      | 0.00 %                       | 99.67 %                     |            |
| 7.400  | 2.85                | 0.01 %                      | 0.31 %                      | 0.00 %                       | 99.68 %                     |            |
| 8.000  | 2.86                | 0.00 %                      | 0.31 %                      | 0.00 %                       | 99.69 %                     |            |
| 9.000  | 2.86                | 0.00 %                      | 0.31 %                      | 0.00 %                       | 99.69 %                     |            |
| 10.000 | 2.86                | 0.00 %                      | 0.31 %                      | 0.00 %                       | 99.69 %                     |            |
| 11.000 | 2.86                | 0.00 %                      | 0.31 %                      | 0.00 %                       | 99.69 %                     |            |
| 12.000 | 2.86                | 0.00 %                      | 0.31 %                      | 0.00 %                       | 99.69 %                     |            |

## Carbonate and acidity

Carbonate 0.225 mM  
 Acidity error 3.005 mM

## Other graphs

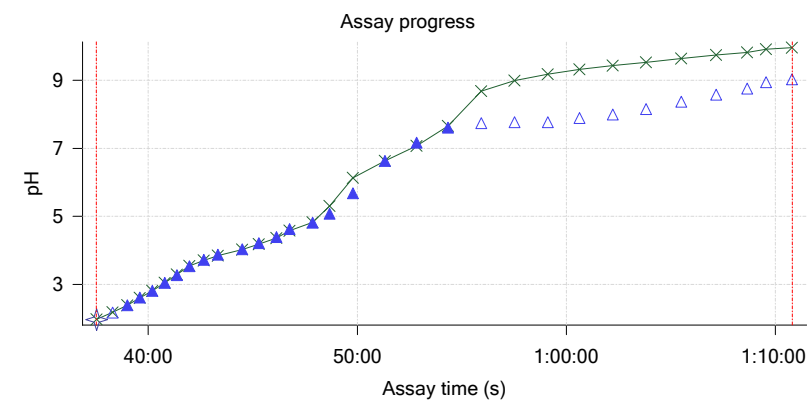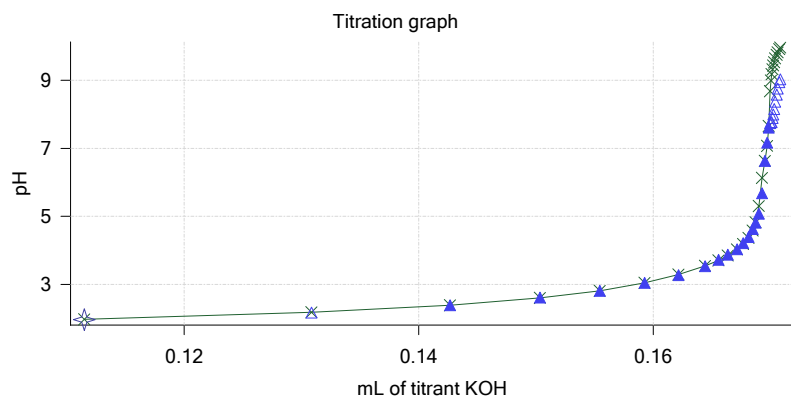

Sample name: **M13\_octanol**  
 Assay name: **pH-metric high logP**  
 Assay ID: **18C-09011**  
 Filename: **C:\Sirius\_T3\Mehtap\20180309\_exp31\_logP\_T3-2\18C-09011\_M13\_octanol\_pH-metric high logP.t3r**

Experiment start time: **3/9/2018 5:12:57 PM**  
 Analyst: **Pion**  
 Instrument ID: **T312060**

## Other graphs (continued)

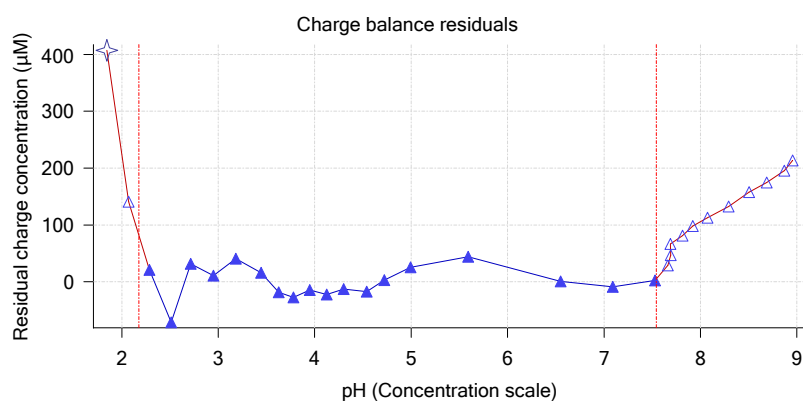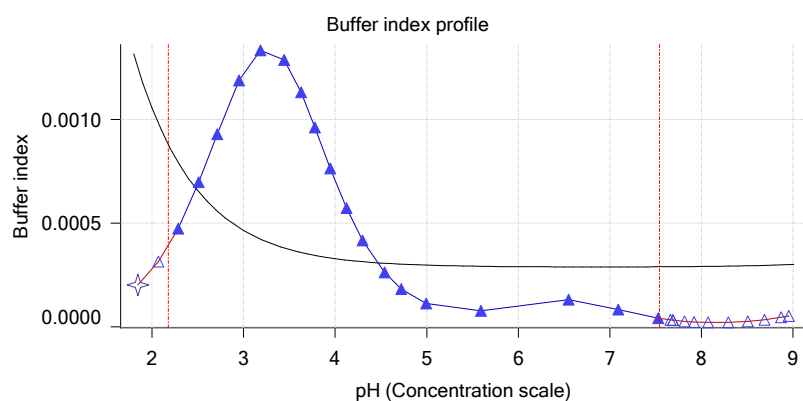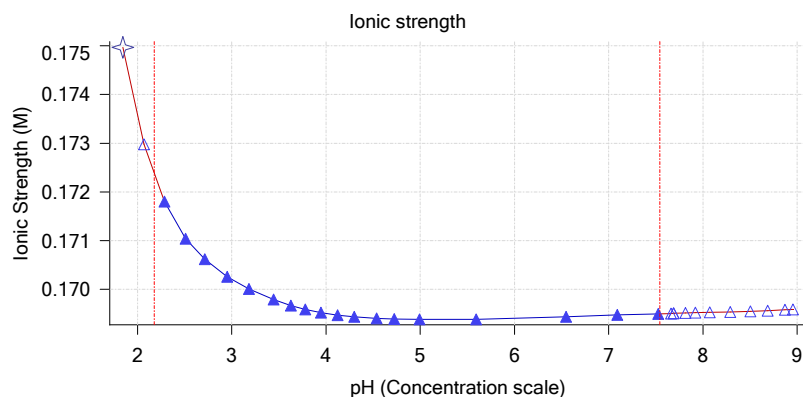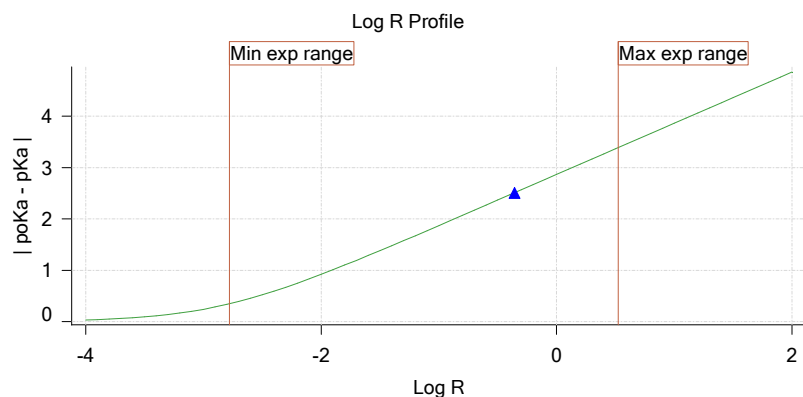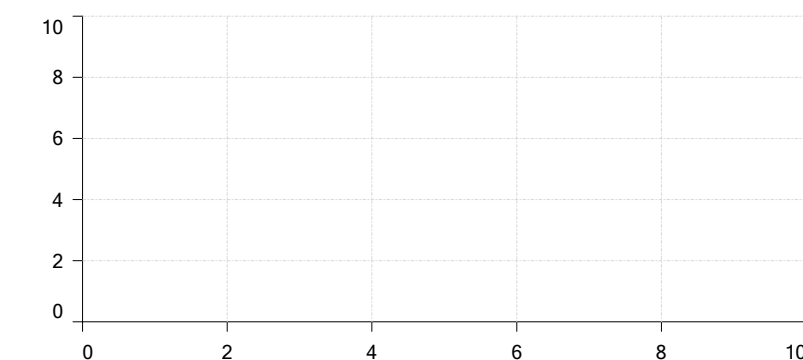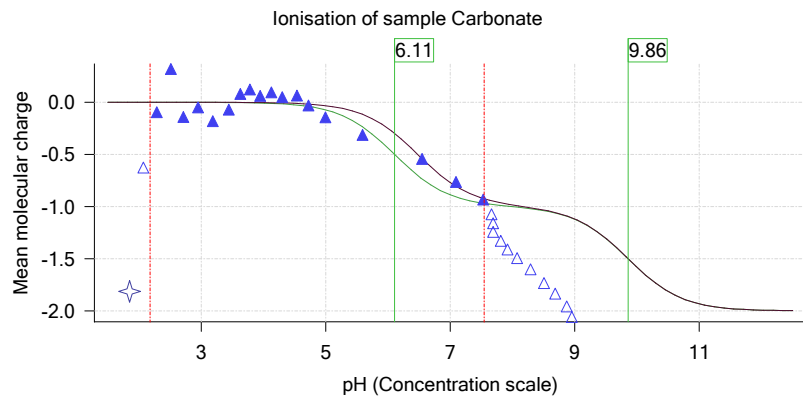

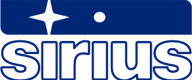

## Assay model

Sample name: **M13\_octanol** Experiment start time: **3/9/2018 5:12:57 PM**  
Assay name: **pH-metric high logP** Analyst: **Pion**  
Assay ID: **18C-09011** Instrument ID: **T312060**  
Filename: **C:\Sirius\_T3\Mehtap\20180309\_exp31\_logP\_T3-2\18C-09011\_M13\_octanol\_pH-metric high logP.t3r**

## Assay Model

| Settings                          | Value        | Date/Time changed    | Imported from      |
|-----------------------------------|--------------|----------------------|--------------------|
| Sample name                       | M13_octanol  | 2/27/2018 5:57:49 PM | User entered value |
| Sample by                         | Weight       |                      | Default value      |
| Sample weight                     | 0.001820 g   | 3/9/2018 2:22:18 PM  | User entered value |
| Formula weight                    | 295.34 g/mol | 2/27/2018 5:57:49 PM | User entered value |
| Solubility                        | Unknown      |                      | Default value      |
| Molecular weight                  | 295.34       | 2/27/2018 5:57:49 PM | User entered value |
| Individual pKa ionic environments | No           |                      | Default value      |
| Number of pKas                    | 1            | 2/27/2018 5:57:49 PM | User entered value |
| Sample is a                       | Base         | 2/27/2018 5:57:49 PM | User entered value |
| pKa 1                             | 5.77         | 2/27/2018 5:57:49 PM | User entered value |
| logp (XH +)                       | -4.56        | 3/2/2018 4:30:48 PM  | User entered value |
| logP (neutral X)                  | 2.99         | 3/2/2018 4:30:43 PM  | User entered value |

## Events

| Time    | Event                  | Water      | Acid       | Base       | Octanol    | pH    | dpH/dt   | pH R-squared | pH SD   | dpH/<br>time |
|---------|------------------------|------------|------------|------------|------------|-------|----------|--------------|---------|--------------|
| 4:58.3  | Manual volume addition |            |            |            | 0.10000 mL |       |          |              |         |              |
| 4:59.4  | Initial pH = 4.15      |            |            |            |            |       |          |              |         |              |
| 7:58.9  | Data point 2           | 1.50000 mL | 0.04534 mL | 0.00680 mL | 0.10000 mL | 2.003 | -0.00733 | 0.78688      | 0.00041 | 10.0 s       |
| 8:45.1  | Data point 3           | 1.50000 mL | 0.04534 mL | 0.02175 mL | 0.10000 mL | 2.213 | -0.00482 | 0.44185      | 0.00036 | 10.0 s       |
| 9:20.7  | Data point 4           | 1.50000 mL | 0.04534 mL | 0.03083 mL | 0.10000 mL | 2.410 | -0.00055 | 0.04460      | 0.00013 | 10.5 s       |
| 9:56.8  | Data point 5           | 1.50000 mL | 0.04534 mL | 0.03669 mL | 0.10000 mL | 2.631 | -0.00364 | 0.36884      | 0.00030 | 10.5 s       |
| 10:32.8 | Data point 6           | 1.50000 mL | 0.04534 mL | 0.04033 mL | 0.10000 mL | 2.831 | -0.01005 | 0.38801      | 0.00080 | 10.0 s       |
| 11:08.3 | Data point 7           | 1.50000 mL | 0.04534 mL | 0.04283 mL | 0.10000 mL | 3.058 | -0.01425 | 0.84558      | 0.00077 | 10.5 s       |
| 11:44.3 | Data point 8           | 1.50000 mL | 0.04534 mL | 0.04466 mL | 0.10000 mL | 3.338 | -0.01848 | 0.91945      | 0.00095 | 19.0 s       |
| 12:33.9 | Data point 9           | 1.50000 mL | 0.04534 mL | 0.04572 mL | 0.10000 mL | 3.531 | -0.01812 | 0.81824      | 0.00099 | 10.0 s       |
| 13:14.4 | Data point 10          | 1.50000 mL | 0.04534 mL | 0.04659 mL | 0.10000 mL | 3.703 | -0.01908 | 0.89474      | 0.00100 | 19.0 s       |
| 14:09.3 | Data point 11          | 1.50000 mL | 0.04534 mL | 0.04802 mL | 0.10000 mL | 3.965 | -0.01908 | 0.89676      | 0.00099 | 20.0 s       |
| 14:54.7 | Data point 12          | 1.50000 mL | 0.04534 mL | 0.04960 mL | 0.10000 mL | 4.221 | -0.01943 | 0.92861      | 0.00100 | 19.0 s       |
| 15:49.3 | Data point 13          | 1.50000 mL | 0.04534 mL | 0.05099 mL | 0.10000 mL | 4.380 | -0.01820 | 0.88224      | 0.00096 | 16.0 s       |
| 16:30.5 | Data point 14          | 1.50000 mL | 0.04534 mL | 0.05219 mL | 0.10000 mL | 4.526 | -0.01937 | 0.97139      | 0.00097 | 25.5 s       |
| 17:31.9 | Data point 15          | 1.50000 mL | 0.04534 mL | 0.05362 mL | 0.10000 mL | 4.762 | -0.01918 | 0.96005      | 0.00097 | 34.5 s       |
| 18:42.1 | Data point 16          | 1.50000 mL | 0.04534 mL | 0.05433 mL | 0.10000 mL | 5.141 | -0.01371 | 0.48473      | 0.00097 | 19.0 s       |
| 19:26.3 | Data point 17          | 1.50000 mL | 0.04534 mL | 0.05468 mL | 0.10000 mL | 5.535 | -0.00613 | 0.11557      | 0.00089 | 21.0 s       |
| 20:17.7 | Data point 18          | 1.50000 mL | 0.04534 mL | 0.05532 mL | 0.10000 mL | 9.077 | -0.02136 | 0.97236      | 0.00107 | Time out at  |
| 22:15.2 | Data point 19          | 1.50000 mL | 0.09918 mL | 0.05532 mL | 0.30000 mL | 1.963 | -0.01099 | 0.97572      | 0.00055 | 10.0 s       |
| 23:01.4 | Data point 20          | 1.50000 mL | 0.09918 mL | 0.07342 mL | 0.30000 mL | 2.171 | -0.01453 | 0.61507      | 0.00092 | 10.0 s       |



## Assay Events

Sample name: **M13\_octanol**  
Assay name: **pH-metric high logP**  
Assay ID: **18C-09011**  
Filename: **C:\Sirius\_T3\Mehtap\20180309\_exp31\_logP\_T3-2\18C-09011\_M13\_octanol\_pH-metric high logP.t3r**

Experiment start time: **3/9/2018 5:12:57 PM**  
Analyst: **Pion**  
Instrument ID: **T312060**

## Events (continued)

| Time      | Event         | Water      | Acid       | Base       | Octanol    | pH    | dpH/dt   | pH R-squared | pH SD   | dpH/dt time         |
|-----------|---------------|------------|------------|------------|------------|-------|----------|--------------|---------|---------------------|
| 23:37.0   | Data point 21 | 1.50000 mL | 0.09918 mL | 0.08438 mL | 0.30000 mL | 2.390 | 0.00209  | 0.42447      | 0.00016 | 10.5 s              |
| 24:13.0   | Data point 22 | 1.50000 mL | 0.09918 mL | 0.09111 mL | 0.30000 mL | 2.590 | -0.00255 | 0.12562      | 0.00035 | 10.0 s              |
| 24:48.6   | Data point 23 | 1.50000 mL | 0.09918 mL | 0.09565 mL | 0.30000 mL | 2.800 | 0.00274  | 0.51472      | 0.00019 | 10.0 s              |
| 25:24.0   | Data point 24 | 1.50000 mL | 0.09918 mL | 0.09887 mL | 0.30000 mL | 3.028 | -0.00247 | 0.23539      | 0.00025 | 10.0 s              |
| 25:59.5   | Data point 25 | 1.50000 mL | 0.09918 mL | 0.10136 mL | 0.30000 mL | 3.378 | -0.01613 | 0.84514      | 0.00087 | 10.0 s              |
| 26:40.1   | Data point 26 | 1.50000 mL | 0.09918 mL | 0.10271 mL | 0.30000 mL | 3.555 | -0.01471 | 0.68891      | 0.00088 | 26.5 s              |
| 27:42.3   | Data point 27 | 1.50000 mL | 0.09918 mL | 0.10400 mL | 0.30000 mL | 3.737 | -0.00307 | 0.05380      | 0.00065 | 10.5 s              |
| 28:28.5   | Data point 28 | 1.50000 mL | 0.09918 mL | 0.10527 mL | 0.30000 mL | 3.879 | -0.01698 | 0.74340      | 0.00098 | 29.0 s              |
| 29:33.3   | Data point 29 | 1.50000 mL | 0.09918 mL | 0.10642 mL | 0.30000 mL | 4.007 | -0.01912 | 0.90936      | 0.00099 | 34.0 s              |
| 30:48.3   | Data point 30 | 1.50000 mL | 0.09918 mL | 0.10807 mL | 0.30000 mL | 4.234 | -0.01945 | 0.95903      | 0.00098 | 40.5 s              |
| 31:59.4   | Data point 31 | 1.50000 mL | 0.09918 mL | 0.10880 mL | 0.30000 mL | 4.397 | -0.01934 | 0.97445      | 0.00097 | 31.5 s              |
| 33:01.6   | Data point 32 | 1.50000 mL | 0.09918 mL | 0.10981 mL | 0.30000 mL | 5.129 | -0.01995 | 0.97002      | 0.00100 | 45.0 s              |
| 34:17.2   | Data point 33 | 1.50000 mL | 0.09918 mL | 0.11037 mL | 0.30000 mL | 6.946 | -0.12491 | 0.99710      | 0.00618 | Timed out at 59.5 s |
| 35:52.9   | Data point 34 | 1.50000 mL | 0.09918 mL | 0.11150 mL | 0.30000 mL | 9.875 | -0.00416 | 0.04424      | 0.00098 | 13.5 s              |
| 37:31.9   | Data point 35 | 1.50000 mL | 0.15807 mL | 0.11150 mL | 0.80000 mL | 1.959 | -0.00284 | 0.16111      | 0.00035 | 10.0 s              |
| 38:18.1   | Data point 36 | 1.50000 mL | 0.15807 mL | 0.13086 mL | 0.80000 mL | 2.175 | -0.00636 | 0.10985      | 0.00095 | 16.0 s              |
| 38:59.8   | Data point 37 | 1.50000 mL | 0.15807 mL | 0.14266 mL | 0.80000 mL | 2.388 | -0.01190 | 0.63324      | 0.00074 | 10.0 s              |
| 39:35.4   | Data point 38 | 1.50000 mL | 0.15807 mL | 0.15033 mL | 0.80000 mL | 2.610 | -0.00893 | 0.81503      | 0.00049 | 10.5 s              |
| 40:11.5   | Data point 39 | 1.50000 mL | 0.15807 mL | 0.15543 mL | 0.80000 mL | 2.809 | -0.01069 | 0.89777      | 0.00056 | 10.0 s              |
| 40:47.0   | Data point 40 | 1.50000 mL | 0.15807 mL | 0.15924 mL | 0.80000 mL | 3.044 | -0.00343 | 0.27090      | 0.00033 | 10.0 s              |
| 41:22.5   | Data point 41 | 1.50000 mL | 0.15807 mL | 0.16214 mL | 0.80000 mL | 3.276 | -0.01814 | 0.88874      | 0.00095 | 10.5 s              |
| 41:58.5   | Data point 42 | 1.50000 mL | 0.15807 mL | 0.16439 mL | 0.80000 mL | 3.535 | -0.01802 | 0.93392      | 0.00092 | 10.0 s              |
| 42:39.1   | Data point 43 | 1.50000 mL | 0.15807 mL | 0.16555 mL | 0.80000 mL | 3.719 | -0.01345 | 0.67807      | 0.00081 | 10.0 s              |
| 43:19.7   | Data point 44 | 1.50000 mL | 0.15807 mL | 0.16634 mL | 0.80000 mL | 3.870 | -0.01661 | 0.94479      | 0.00084 | 29.0 s              |
| 44:29.7   | Data point 45 | 1.50000 mL | 0.15807 mL | 0.16712 mL | 0.80000 mL | 4.037 | -0.00694 | 0.13256      | 0.00094 | 11.5 s              |
| 45:17.0   | Data point 46 | 1.50000 mL | 0.15807 mL | 0.16766 mL | 0.80000 mL | 4.213 | 0.00141  | 0.00562      | 0.00093 | 10.5 s              |
| 46:08.4   | Data point 47 | 1.50000 mL | 0.15807 mL | 0.16811 mL | 0.80000 mL | 4.389 | -0.01790 | 0.90016      | 0.00093 | 11.5 s              |
| 46:45.3   | Data point 48 | 1.50000 mL | 0.15807 mL | 0.16846 mL | 0.80000 mL | 4.627 | -0.01929 | 0.94369      | 0.00098 | 35.5 s              |
| 47:51.4   | Data point 49 | 1.50000 mL | 0.15807 mL | 0.16872 mL | 0.80000 mL | 4.810 | -0.01458 | 0.57061      | 0.00095 | 19.0 s              |
| 48:40.8   | Data point 50 | 1.50000 mL | 0.15807 mL | 0.16898 mL | 0.80000 mL | 5.080 | -0.01848 | 0.89699      | 0.00096 | 36.0 s              |
| 49:47.4   | Data point 51 | 1.50000 mL | 0.15807 mL | 0.16926 mL | 0.80000 mL | 5.677 | -0.01986 | 0.97546      | 0.00099 | 56.0 s              |
| 51:19.2   | Data point 52 | 1.50000 mL | 0.15807 mL | 0.16950 mL | 0.80000 mL | 6.630 | -0.10160 | 0.99674      | 0.00502 | Timed out at 59.5 s |
| 52:49.7   | Data point 53 | 1.50000 mL | 0.15807 mL | 0.16969 mL | 0.80000 mL | 7.171 | -0.11670 | 0.99695      | 0.00577 | Timed out at 59.5 s |
| 54:20.2   | Data point 54 | 1.50000 mL | 0.15807 mL | 0.16983 mL | 0.80000 mL | 7.606 | -0.10666 | 0.99532      | 0.00527 | Timed out at 59.5 s |
| 55:55.8   | Data point 55 | 1.50000 mL | 0.15807 mL | 0.16994 mL | 0.80000 mL | 7.740 | -0.06542 | 0.99344      | 0.00324 | Timed out at 59.5 s |
| 57:31.5   | Data point 56 | 1.50000 mL | 0.15807 mL | 0.17001 mL | 0.80000 mL | 7.767 | -0.04725 | 0.99135      | 0.00234 | Timed out at 59.5 s |
| 59:07.1   | Data point 57 | 1.50000 mL | 0.15807 mL | 0.17008 mL | 0.80000 mL | 7.767 | -0.03770 | 0.96936      | 0.00189 | Timed out at 59.5 s |
| 1:00:37.5 | Data point 58 | 1.50000 mL | 0.15807 mL | 0.17016 mL | 0.80000 mL | 7.892 | -0.03830 | 0.97684      | 0.00191 | Timed out at 59.5 s |
| 1:02:13.0 | Data point 59 | 1.50000 mL | 0.15807 mL | 0.17023 mL | 0.80000 mL | 7.996 | -0.03517 | 0.97225      | 0.00176 | Timed out at 59.5 s |
| 1:03:48.7 | Data point 60 | 1.50000 mL | 0.15807 mL | 0.17030 mL | 0.80000 mL | 8.151 | -0.02938 | 0.97141      | 0.00147 | Timed out at 59.5 s |
| 1:05:29.4 | Data point 61 | 1.50000 mL | 0.15807 mL | 0.17039 mL | 0.80000 mL | 8.367 | -0.02206 | 0.95552      | 0.00111 | Timed out at 59.5 s |
| 1:07:10.1 | Data point 62 | 1.50000 mL | 0.15807 mL | 0.17051 mL | 0.80000 mL | 8.580 | -0.01905 | 0.91928      | 0.00098 | 48.0 s              |
| 1:08:39.0 | Data point 63 | 1.50000 mL | 0.15807 mL | 0.17060 mL | 0.80000 mL | 8.761 | -0.01127 | 0.33329      | 0.00096 | 18.5 s              |
| 1:09:33.2 | Data point 64 | 1.50000 mL | 0.15807 mL | 0.17072 mL | 0.80000 mL | 8.944 | -0.01844 | 0.86480      | 0.00098 | 43.5 s              |
| 1:10:47.3 | Data point 65 | 1.50000 mL | 0.15807 mL | 0.17081 mL | 0.80000 mL | 9.028 | -0.01594 | 0.74914      | 0.00091 | 17.0 s              |
| 1:11:13.3 | Assay volumes | 1.50000 mL | 0.15807 mL | 0.17081 mL | 0.80000 mL |       |          |              |         |                     |

Sample name: **M13\_octanol**  
 Assay name: **pH-metric high logP**  
 Assay ID: **18C-09011**  
 Filename: **C:\Sirius\_T3\Mehtap\20180309\_exp31\_logP\_T3-2\18C-09011\_M13\_octanol\_pH-metric high logP.t3r**

Experiment start time: **3/9/2018 5:12:57 PM**  
 Analyst: **Pion**  
 Instrument ID: **T312060**

## Assay Settings

| Setting                             | Value              | Original Value | Date/Time changed | Imported from |
|-------------------------------------|--------------------|----------------|-------------------|---------------|
| <b>General Settings</b>             |                    |                |                   |               |
| Analyst name                        | Pion               |                |                   |               |
| <b>Standard Experiment Settings</b> |                    |                |                   |               |
| Number of titrations                | 3                  |                |                   |               |
| Minimum pH                          | 2.000              |                |                   |               |
| Maximum pH                          | 9.000              |                |                   |               |
| pH step between points of           | 0.200              |                |                   |               |
| Minimum titrant addition            | 0.00002 mL         |                |                   |               |
| Maximum titrant addition            | 0.10000 mL         |                |                   |               |
| Argon flow rate                     | 100%               |                |                   |               |
| Start titration using               | Cautious pH adjust |                |                   |               |
| <b>Advanced General Settings</b>    |                    |                |                   |               |
| Detect turbidity using              | None               |                |                   |               |
| Collect turbidity sensor data       | No                 |                |                   |               |
| Collect UV spectra                  | No                 |                |                   |               |
| Stir after titrant addition for     | 5 seconds          |                |                   |               |
| For titrant addition, stir at       | 10%                |                |                   |               |
| <b>Titration Pre-Dose</b>           |                    |                |                   |               |
| Titration pre-dose                  | None               |                |                   |               |
| <b>Assay Medium</b>                 |                    |                |                   |               |
| ISA water volume                    | 1.50 mL            |                |                   |               |
| Water added                         | Automatic          |                |                   |               |
| Partition solvent type              | Octanol            |                |                   |               |
| Partition volume                    | 0.100 mL           |                |                   |               |
| Partition solvent added             | Manual in advance  |                |                   |               |
| After partition addition, stir for  | 1 seconds          |                |                   |               |
| <b>Sample Sonication</b>            |                    |                |                   |               |
| Sonicate                            | Yes                |                |                   |               |
| Adjust pH for sonication            | No                 |                |                   |               |
| Sonicate for                        | 60 seconds         |                |                   |               |
| After sonication stir for           | 5 seconds          |                |                   |               |
| <b>Sample Dissolution</b>           |                    |                |                   |               |
| Perform a dissolution stage         | Yes                |                |                   |               |
| Adjust and hold pH for dissolution  | To start pH        |                |                   |               |
| Stir to dissolve for                | 120 seconds        |                |                   |               |
| For dissolution, stir at            | 10%                |                |                   |               |
| <b>Carbonate purge</b>              |                    |                |                   |               |
| Perform a carbonate purge           | No                 |                |                   |               |
| <b>Temperature Control</b>          |                    |                |                   |               |
| Wait for temperature                | Yes                |                |                   |               |
| Required start temperature          | 25.0°C             |                |                   |               |
| Acceptable deviation                | 0.5°C              |                |                   |               |
| Time to wait                        | 60 seconds         |                |                   |               |
| Stir speed of                       | 50%                |                |                   |               |
| <b>Titration 1</b>                  |                    |                |                   |               |
| Titrate from                        | Low to high pH     |                |                   |               |
| Adjust to start pH                  | Yes                |                |                   |               |
| After pH adjust stir for            | 30 seconds         |                |                   |               |
| Stir to allow partitioning for      | 15 seconds         |                |                   |               |
| Stirrer speed for partitioning      | 50%                |                |                   |               |
| <b>Titration 2</b>                  |                    |                |                   |               |
| Titrate from                        | Low to high pH     |                |                   |               |
| Add additional water                | 0.00 mL            |                |                   |               |
| Additional partition solvent volume | 0.200 mL           |                |                   |               |
| Additional partition solvent added  | Automatic          |                |                   |               |
| After pH adjust stir for            | 30 seconds         |                |                   |               |
| Stir to allow partitioning for      | 15 seconds         |                |                   |               |
| Stirrer speed for partitioning      | 55%                |                |                   |               |



Sample name: **M13\_octanol** Experiment start time: **3/9/2018 5:12:57 PM**  
 Assay name: **pH-metric high logP** Analyst: **Pion**  
 Assay ID: **18C-09011** Instrument ID: **T312060**  
 Filename: **C:\Sirius\_T3\Mehtap\20180309\_exp31\_logP\_T3-2\18C-09011\_M13\_octanol\_pH-metric high logP.t3r**

## Assay Settings (continued)

| Setting                             | Value          | Original Value | Date/Time changed | Imported from |
|-------------------------------------|----------------|----------------|-------------------|---------------|
| <b>Titration 3</b>                  |                |                |                   |               |
| Titrate from                        | Low to high pH |                |                   |               |
| Add additional water                | 0.00 mL        |                |                   |               |
| Additional partition solvent volume | 0.500 mL       |                |                   |               |
| Additional partition solvent added  | Automatic      |                |                   |               |
| After pH adjust stir for            | 30 seconds     |                |                   |               |
| Stir to allow partitioning for      | 15 seconds     |                |                   |               |
| Stirrer speed for partitioning      | 60%            |                |                   |               |
| <b>Data Point Stability</b>         |                |                |                   |               |
| Stir during data point collection   | No             |                |                   |               |
| Delay before data point collection  | 0 seconds      |                |                   |               |
| Number of points to average         | 20 points      |                |                   |               |
| Time interval between points        | 0.50 seconds   |                |                   |               |
| Required maximum standard deviation | 0.00100 dpH/dt |                |                   |               |
| Stability timeout after             | 60 seconds     |                |                   |               |

## Calibration Settings

| Setting                   | Value  | Date/Time changed   | Imported from             |
|---------------------------|--------|---------------------|---------------------------|
| Four-Plus alpha           | 0.102  | 3/9/2018 5:12:57 PM | C:\Sirius_T3\HCl18C09.t3r |
| Four-Plus S               | 0.9967 | 3/9/2018 5:12:57 PM | C:\Sirius_T3\HCl18C09.t3r |
| Four-Plus jH              | 1.2    | 3/9/2018 5:12:57 PM | C:\Sirius_T3\HCl18C09.t3r |
| Four-Plus jOH             | 0.0    | 3/9/2018 5:12:57 PM | C:\Sirius_T3\HCl18C09.t3r |
| Base concentration factor | 1.000  | 3/9/2018 5:12:57 PM | C:\Sirius_T3\KOH18B27.t3r |
| Acid concentration factor | 1.000  | 3/9/2018 5:12:57 PM | C:\Sirius_T3\HCl18C09.t3r |

## Instrument Settings

| Setting              | Value                      | Batch Id    | Install date           |
|----------------------|----------------------------|-------------|------------------------|
| Instrument owner     | Merck                      |             |                        |
| Instrument ID        | T312060                    |             |                        |
| Instrument type      | T3 Simulator               |             |                        |
| Software version     | 1.1.3.0                    |             |                        |
| Dispenser module     |                            | T3DM1200361 | 3/31/2009 6:24:52 AM   |
| Dispenser 0          | Water                      |             | 3/31/2009 6:25:05 AM   |
| Syringe volume       | 2.5 mL                     |             |                        |
| Firmware version     | 1.2.1(r2)                  |             |                        |
| Titrant              | Water (0.15 M KCl)         | 02-06-2018  | 2/27/2018 11:05:59 AM  |
| Dispenser 2          | Acid                       |             | 3/31/2009 6:25:11 AM   |
| Syringe volume       | 0.5 mL                     |             |                        |
| Firmware version     | 1.2.1(r2)                  |             |                        |
| Titrant              | Acid (0.5 M HCl)           | 02-27-2018  | 2/27/2018 11:27:22 AM  |
| Dispenser 1          | Base                       |             | 3/31/2009 6:25:21 AM   |
| Syringe volume       | 0.5 mL                     |             |                        |
| Firmware version     | 1.2.1(r2)                  |             |                        |
| Titrant              | Base (0.5 M KOH)           | 9/22/2017   | 2/27/2018 11:21:22 AM  |
| Dispenser 5          | Cosolvent                  |             | 3/31/2009 6:26:24 AM   |
| Syringe volume       | 2.5 mL                     |             |                        |
| Firmware version     | 1.2.1(r2)                  |             |                        |
| Distribution valve 5 | Distribution Valve         |             | 3/31/2009 6:28:19 AM   |
| Firmware version     | 1.1.3                      |             |                        |
| Port A               | Methanol (80%, 0.15 M KCl) | 02-08-2018  | 3/6/2018 10:28:59 AM   |
| Port B               | Cyclohexane                | 11-01-17    | 2/27/2018 11:37:57 AM  |
| Dispenser 3          | Buffer                     |             | 8/3/2010 6:05:16 AM    |
| Syringe volume       | 0.5 mL                     |             |                        |
| Firmware version     | 1.2.1(r2)                  |             |                        |
| Titrant              | Dodecane                   | 2018/01/31  | 2/28/2018 11:18:04 AM  |
| Dispenser 6          | Octanol                    |             | 10/22/2010 11:52:43 AM |



Sample name: **M13\_octanol** Experiment start time: **3/9/2018 5:12:57 PM**  
 Assay name: **pH-metric high logP** Analyst: **Pion**  
 Assay ID: **18C-09011** Instrument ID: **T312060**  
 Filename: **C:\Sirius\_T3\Mehtap\20180309\_exp31\_logP\_T3-2\18C-09011\_M13\_octanol\_pH-metric high logP.t3r**

## Instrument Settings (continued)

| Setting                                   | Value                      | Batch Id    | Install date           |
|-------------------------------------------|----------------------------|-------------|------------------------|
| Syringe volume                            | 0.5 mL                     |             |                        |
| Firmware version                          | 1.2.1(r2)                  |             |                        |
| Titration                                 | Octanol                    | 01-31-2018  | 2/27/2018 10:59:35 AM  |
| Titration                                 |                            | T3TM1200161 | 3/31/2009 6:24:17 AM   |
| Horizontal axis firmware version          | 1.17 AI1DI2DO2 Stepper 2   |             |                        |
| Vertical axis firmware version            | 1.17 AI1DI2DO2 Stepper 2   |             |                        |
| Chassis I/O firmware version              | 1.11 AI1DI0DO4 Norgren I/O |             |                        |
| Probe I/O firmware version                | 1.1.1                      |             |                        |
| Electrode                                 | T3 Electrode               | T3E0923     | 1/23/2018 3:01:00 PM   |
| E0 calibration                            | +5.90 mV                   |             | 3/9/2018 5:13:25 PM    |
| Filling solution                          | 3M KCl                     | KCL097      | 3/9/2018 11:05:42 AM   |
| Liquids                                   |                            |             |                        |
| Wash 1                                    | 50% IPA:50% Water          |             | 3/9/2018 11:04:22 AM   |
| Wash 2                                    | 0.5% Triton X-100 in H2O   |             | 3/9/2018 11:04:25 AM   |
| Buffer position 1                         | pH7 Wash                   |             | 3/9/2018 11:04:27 AM   |
| Buffer position 2                         | pH 7                       |             | 3/9/2018 11:04:30 AM   |
| Storage position                          |                            |             | 3/9/2018 11:05:04 AM   |
| Wash water                                | 5.2e+003 mL                | 02-27-2018  | 2/27/2018 10:54:39 AM  |
| Waste                                     | 1e+004 mL                  |             | 11/28/2017 11:36:29 AM |
| Temperature controller                    |                            |             | 8/5/2010 7:35:13 AM    |
| Turbidity detector                        |                            |             | 3/31/2009 6:24:45 AM   |
| Spectrometer                              |                            | 074811      | 11/23/2010 12:22:28 PM |
| Dip probe                                 |                            | 10196       |                        |
| Wavelength coefficient A0                 | 183.333                    |             |                        |
| Wavelength coefficient A1                 | 2.21568                    |             |                        |
| Wavelength coefficient A2                 | -0.000289308               |             |                        |
| Total lamp lit time                       | 123:16:41                  |             | 11/23/2010 12:22:28 PM |
| Calibrated on                             | 2/27/2018 11:40:38 AM      |             |                        |
| Integration time                          | 40                         |             |                        |
| Scans averaged                            | 10                         |             |                        |
| Autoloader                                |                            | T3AL1200345 | 11/10/2015 10:34:13 AM |
| Left-right axis firmware version          | 1.17 AI1DI2DO2 Stepper 2   |             |                        |
| Front-back axis firmware version          | 1.17 AI1DI2DO2 Stepper 2   |             |                        |
| Vertical axis firmware version            | 1.17 AI1DI2DO2 Stepper 2   |             |                        |
| Chassis I/O firmware version              | 1.11 AI1DI0DO4 Norgren I/O |             |                        |
| Configuration                             |                            |             |                        |
| Alternate titration position              | Titration position         |             |                        |
| Alternate reference position              | Reference position         |             |                        |
| Maximum standard vial volume              | 3.50 mL                    |             |                        |
| Maximum alternate vial volume             | 25.00 mL                   |             |                        |
| Automatic action idle period              | 5 minute(s)                |             |                        |
| Titration tube volume                     | 1.3 mL                     |             |                        |
| Syringe flush count                       | 3.50                       |             |                        |
| Flowing wash pump volume                  | 20.0 mL                    |             |                        |
| Flowing wash stir duration                | 5 s                        |             |                        |
| Flowing wash stir speed                   | 30%                        |             |                        |
| Solvent wash stir duration                | 5 s                        |             |                        |
| Solvent wash stir speed                   | 30%                        |             |                        |
| Surfactant wash stir duration             | 5 s                        |             |                        |
| Surfactant wash stir speed                | 30%                        |             |                        |
| E0 calibration minimum number of points   | 10                         |             |                        |
| E0 calibration maximum standard deviation | 0.01500                    |             |                        |
| E0 calibration timeout period             | 60 s                       |             |                        |
| E0 calibration stir duration              | 5 s                        |             |                        |
| E0 calibration preparation stir speed     | 30%                        |             |                        |
| E0 calibration buffer wash stir duration  | 5 s                        |             |                        |
| E0 calibration buffer wash stir speed     | 30%                        |             |                        |
| E0 calibration reading stir speed         | 0%                         |             |                        |

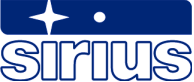

## Assay Settings

Sample name: **M13\_octanol** Experiment start time: **3/9/2018 5:12:57 PM**  
Assay name: **pH-metric high logP** Analyst: **Pion**  
Assay ID: **18C-09011** Instrument ID: **T312060**  
Filename: **C:\Sirius\_T3\Mehtap\20180309\_exp31\_logP\_T3-2\18C-09011\_M13\_octanol\_pH-metric high logP.t3r**

### Instrument Settings (continued)

| Setting                                     | Value   | Batch Id | Install date |
|---------------------------------------------|---------|----------|--------------|
| Spectrometer calibration stir duration      | 5 s     |          |              |
| Spectrometer calibration stir speed         | 30%     |          |              |
| Spectrometer calibration wash pump volume   | 20.0 mL |          |              |
| Spectrometer calibration wash stir duration | 5 s     |          |              |
| Spectrometer calibration wash stir speed    | 30%     |          |              |
| Overhead dispense height                    | 10000   |          |              |

### Refinement Settings

| Setting                        | Value    | Default value |
|--------------------------------|----------|---------------|
| Turbidity detection method     | None     | None          |
| Turbidity wavelength to assess | 500.0 nm | 500.0 nm      |
| Turbidity maximum absorbance   | 0.100    | 0.100         |
| Turbidity probe threshold      | 50.00    | 50.00         |
