# Supplementary material for: Octanol-water partition coefficient measurements for the SAMPL6 Blind Prediction Challenge
Source: bioRxiv or medRxiv preprint supplement (doi:10.1101/757393), 2019-12-02
Supplement: Supplementary file [file media-2.zip]

Sample name: **M11\_octanol**  
 Assay name: **pH-metric high logP**  
 Assay ID: **18C-01001**  
 Filename: **C:\Sirius\_T3\Mehtap\20180228\_exp28\_logP\_T3-2\18C-01001\_M11\_octanol\_pH-metric high logP.t3r**

Experiment start time: **3/1/2018 12:11:22 AM**  
 Analyst: **Pion**  
 Instrument ID: **T312060**

## pH-metric Result

logP (XH +) 0.55 ±0.07 (n=50)  
 logP (neutral X) 2.19 ±0.02 (n=50)

### 18C-01001 Points 1 to 23

M11\_octanol concentration factor 1.023  
 Carbonate 0.0000 mM  
 Acidity error 0.03008 mM

### 18C-01001 Points 24 to 48

M11\_octanol concentration factor 0.912  
 Carbonate 0.0957 mM  
 Acidity error -0.30629 mM

### 18C-01001 Points 49 to 69

M11\_octanol concentration factor 0.792  
 Carbonate 0.0733 mM  
 Acidity error -0.81928 mM

## Warnings and errors

Errors None  
 Warnings None

## Sample logD and percent species

| pH     | M11_octanol<br>logD | M11_octanol<br>M11_octanolH | M11_octanol<br>M11_octanol | M11_octanol<br>M11_octanolH* | M11_octanol<br>M11_octanol* | Comment    |
|--------|---------------------|-----------------------------|----------------------------|------------------------------|-----------------------------|------------|
| 1.000  | 0.57                | 21.08 %                     | 0.03 %                     | 74.70 %                      | 4.20 %                      | Stomach pH |
| 1.200  | 0.59                | 20.57 %                     | 0.04 %                     | 72.90 %                      | 6.49 %                      |            |
| 2.000  | 0.74                | 15.27 %                     | 0.20 %                     | 54.12 %                      | 30.41 %                     |            |
| 3.000  | 1.32                | 4.07 %                      | 0.52 %                     | 14.42 %                      | 80.99 %                     |            |
| 4.000  | 1.95                | 0.49 %                      | 0.63 %                     | 1.73 %                       | 97.15 %                     |            |
| 5.000  | 2.16                | 0.05 %                      | 0.64 %                     | 0.18 %                       | 99.13 %                     | Blood pH   |
| 6.000  | 2.19                | 0.00 %                      | 0.64 %                     | 0.02 %                       | 99.33 %                     |            |
| 6.500  | 2.19                | 0.00 %                      | 0.64 %                     | 0.01 %                       | 99.35 %                     |            |
| 7.000  | 2.19                | 0.00 %                      | 0.64 %                     | 0.00 %                       | 99.35 %                     |            |
| 7.400  | 2.19                | 0.00 %                      | 0.64 %                     | 0.00 %                       | 99.36 %                     |            |
| 8.000  | 2.19                | 0.00 %                      | 0.64 %                     | 0.00 %                       | 99.36 %                     |            |
| 9.000  | 2.19                | 0.00 %                      | 0.64 %                     | 0.00 %                       | 99.36 %                     |            |
| 10.000 | 2.19                | 0.00 %                      | 0.64 %                     | 0.00 %                       | 99.36 %                     |            |
| 11.000 | 2.19                | 0.00 %                      | 0.64 %                     | 0.00 %                       | 99.36 %                     |            |
| 12.000 | 2.19                | 0.00 %                      | 0.64 %                     | 0.00 %                       | 99.36 %                     |            |

Sample name: **M11\_octanol**  
 Assay name: **pH-metric high logP**  
 Assay ID: **18C-01001**  
 Filename: **C:\Sirius\_T3\Mehtap\20180228\_exp28\_logP\_T3-2\18C-01001\_M11\_octanol\_pH-metric high logP.t3r**

Experiment start time: **3/1/2018 12:11:22 AM**  
 Analyst: **Pion**  
 Instrument ID: **T312060**

## Graphs

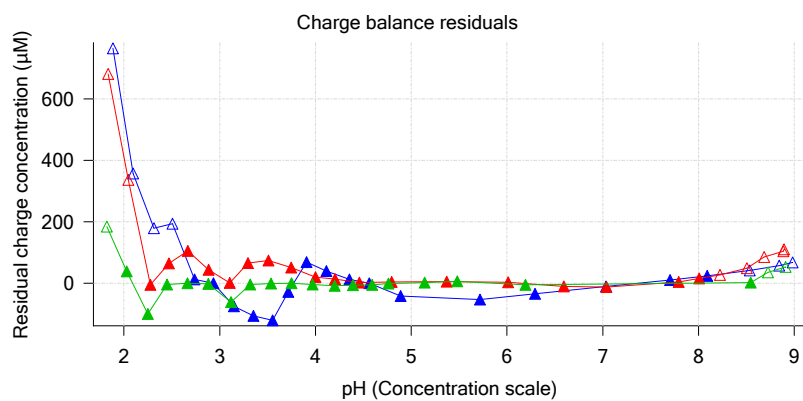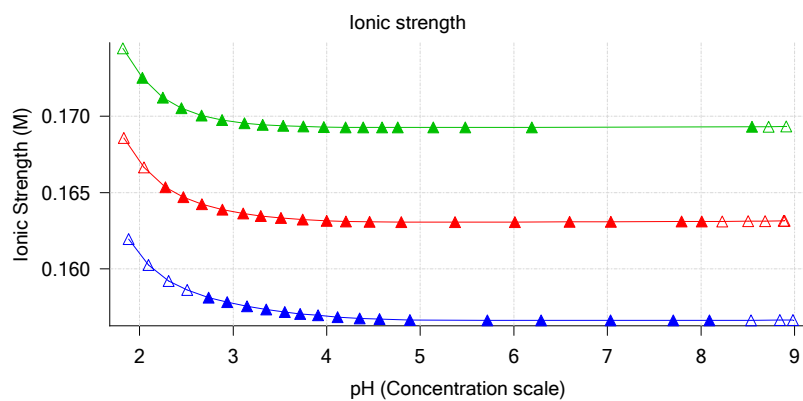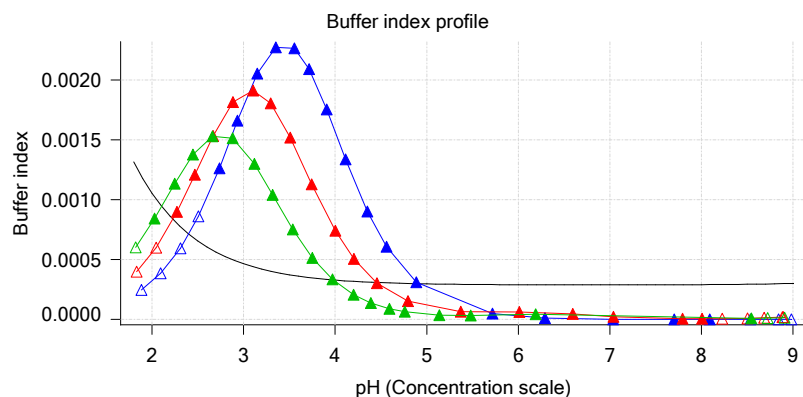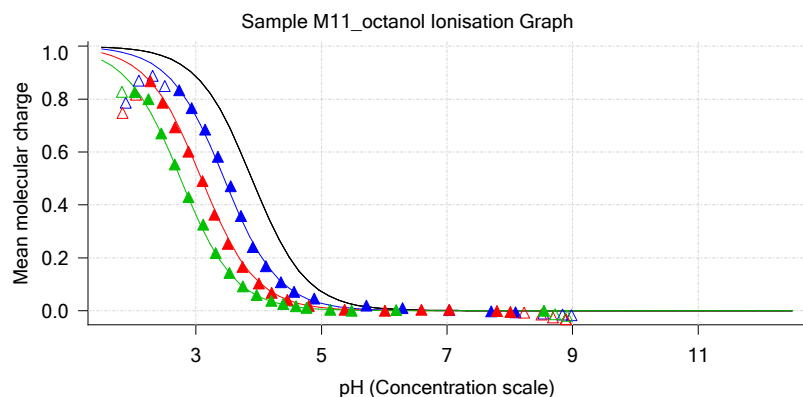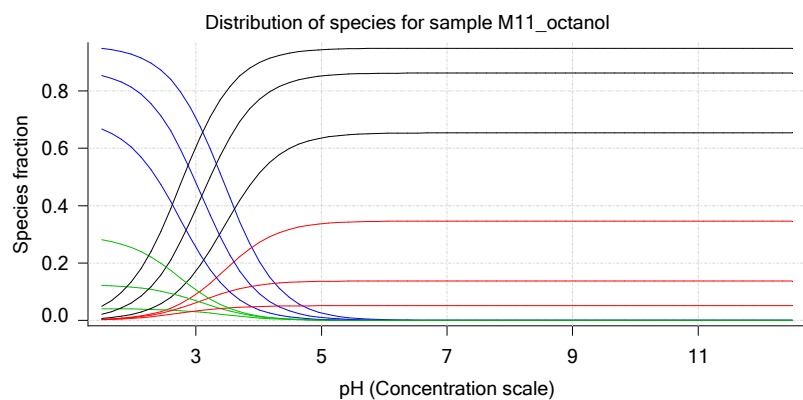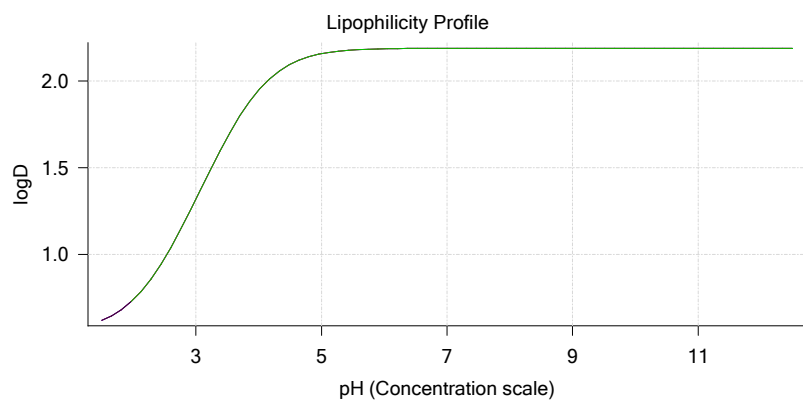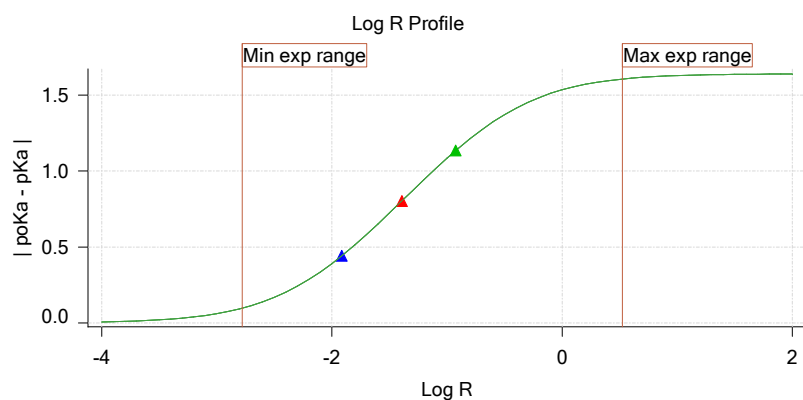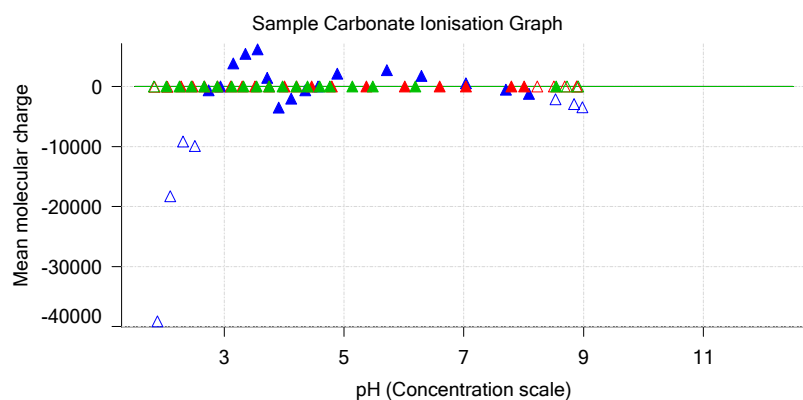

|              |                                                                                                   |                        |                             |
|--------------|---------------------------------------------------------------------------------------------------|------------------------|-----------------------------|
| Sample name: | <b>M11_octanol</b>                                                                                | Experiment start time: | <b>3/1/2018 12:11:22 AM</b> |
| Assay name:  | <b>pH-metric high logP</b>                                                                        | Analyst:               | <b>Pion</b>                 |
| Assay ID:    | <b>18C-01001</b>                                                                                  | Instrument ID:         | <b>T312060</b>              |
| Filename:    | <b>C:\Sirius_T3\Mehtap\20180228_exp28_logP_T3-2\18C-01001_M11_octanol_pH-metric high logP.t3r</b> |                        |                             |

## Graphs (continued)

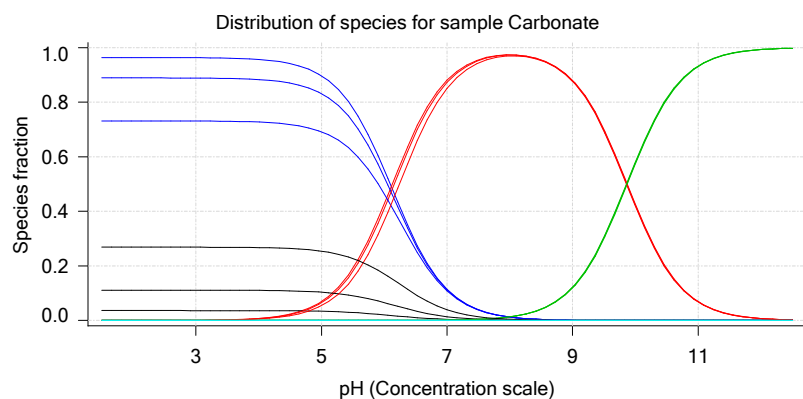

Sample name: **M11\_octanol**  
 Assay name: **pH-metric high logP**  
 Assay ID: **18C-01001**  
 Filename: **C:\Sirius\_T3\Mehtap\20180228\_exp28\_logP\_T3-2\18C-01001\_M11\_octanol\_pH-metric high logP.t3r**

Experiment start time: **3/1/2018 12:11:22 AM**  
 Analyst: **Pion**  
 Instrument ID: **T312060**

## pH-metric high logP Titration 1 of 3 18C-01001 Points 1 to 23

### Overall results

RMSD 1.827  
 Average ionic strength 0.157 M  
 Average temperature 25.0°C  
 Partition ratio 0.0122 : 1  
 Analyte concentration range 3838.3 µM to 3962.6 µM  
 Total points considered 16 of 23

### Warnings and errors

Errors None  
 Warnings One or more logP values out of range

### Four-Plus parameters

Alpha 0.130 3/1/2018 12:11:22 AM C:\Sirius\_T3\HCl18B27.t3r  
 S 0.9970 3/1/2018 12:11:22 AM C:\Sirius\_T3\HCl18B27.t3r  
 jH 0.8 3/1/2018 12:11:22 AM C:\Sirius\_T3\HCl18B27.t3r  
 jOH -0.4 3/1/2018 12:11:22 AM C:\Sirius\_T3\HCl18B27.t3r

### Titrants

0.50 M HCl 0.993513 3/1/2018 12:11:22 AM C:\Sirius\_T3\HCl18B27.t3r  
 0.50 M KOH 0.999845 3/1/2018 12:11:22 AM C:\Sirius\_T3\KOH18B27.t3r

### Sample

M11\_octanol concentration factor 1.023  
 Base pKa 1 3.89  
 logP (XH +) -8.26  
 logP (neutral X) 2.13

### Sample graphs

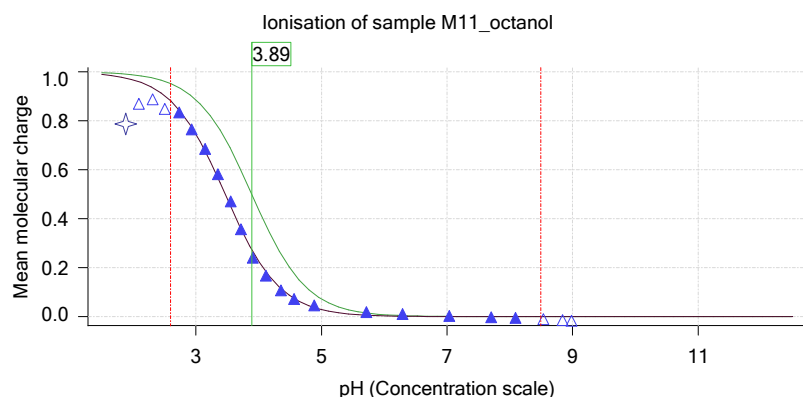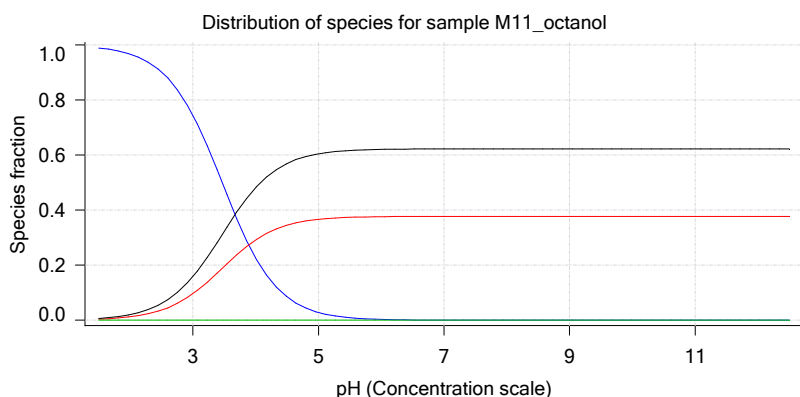

Sample name: **M11\_octanol**  
 Assay name: **pH-metric high logP**  
 Assay ID: **18C-01001**  
 Filename: **C:\Sirius\_T3\Mehtap\20180228\_exp28\_logP\_T3-2\18C-01001\_M11\_octanol\_pH-metric high logP.t3r**

Experiment start time: **3/1/2018 12:11:22 AM**  
 Analyst: **Pion**  
 Instrument ID: **T312060**

## Sample graphs (continued)

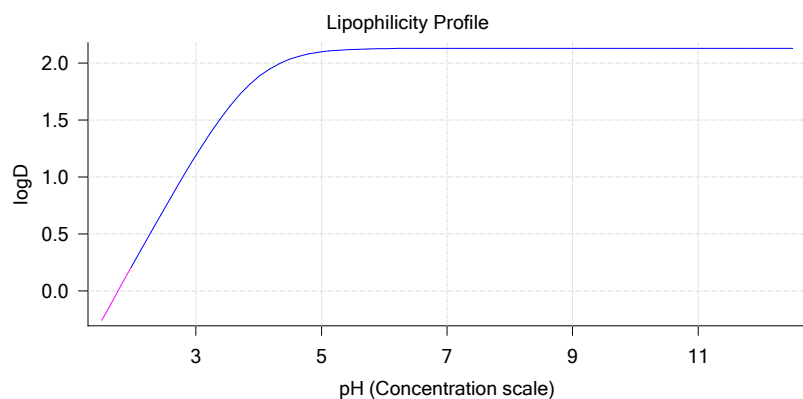

## Sample logD and percent species

| pH     | M11_octanol<br>logD | M11_octanol<br>M11_octanolH | M11_octanol<br>M11_octanolH | M11_octanol<br>M11_octanolH* | M11_octanol<br>M11_octanol* | Comment    |
|--------|---------------------|-----------------------------|-----------------------------|------------------------------|-----------------------------|------------|
| 1.000  | -0.76               | 99.66 %                     | 0.13 %                      | 0.00 %                       | 0.21 %                      |            |
| 1.200  | -0.56               | 99.46 %                     | 0.20 %                      | 0.00 %                       | 0.34 %                      | Stomach pH |
| 2.000  | 0.24                | 96.70 %                     | 1.25 %                      | 0.00 %                       | 2.06 %                      |            |
| 3.000  | 1.19                | 74.55 %                     | 9.60 %                      | 0.00 %                       | 15.84 %                     |            |
| 4.000  | 1.88                | 22.66 %                     | 29.19 %                     | 0.00 %                       | 48.16 %                     |            |
| 5.000  | 2.10                | 2.85 %                      | 36.66 %                     | 0.00 %                       | 60.49 %                     |            |
| 6.000  | 2.13                | 0.29 %                      | 37.63 %                     | 0.00 %                       | 62.08 %                     |            |
| 6.500  | 2.13                | 0.09 %                      | 37.70 %                     | 0.00 %                       | 62.20 %                     |            |
| 7.000  | 2.13                | 0.03 %                      | 37.73 %                     | 0.00 %                       | 62.24 %                     |            |
| 7.400  | 2.13                | 0.01 %                      | 37.73 %                     | 0.00 %                       | 62.25 %                     | Blood pH   |
| 8.000  | 2.13                | 0.00 %                      | 37.74 %                     | 0.00 %                       | 62.26 %                     |            |
| 9.000  | 2.13                | 0.00 %                      | 37.74 %                     | 0.00 %                       | 62.26 %                     |            |
| 10.000 | 2.13                | 0.00 %                      | 37.74 %                     | 0.00 %                       | 62.26 %                     |            |
| 11.000 | 2.13                | 0.00 %                      | 37.74 %                     | 0.00 %                       | 62.26 %                     |            |
| 12.000 | 2.13                | 0.00 %                      | 37.74 %                     | 0.00 %                       | 62.26 %                     |            |

## Carbonate and acidity

Carbonate 0.000 mM  
 Acidity error 0.030 mM

## Other graphs

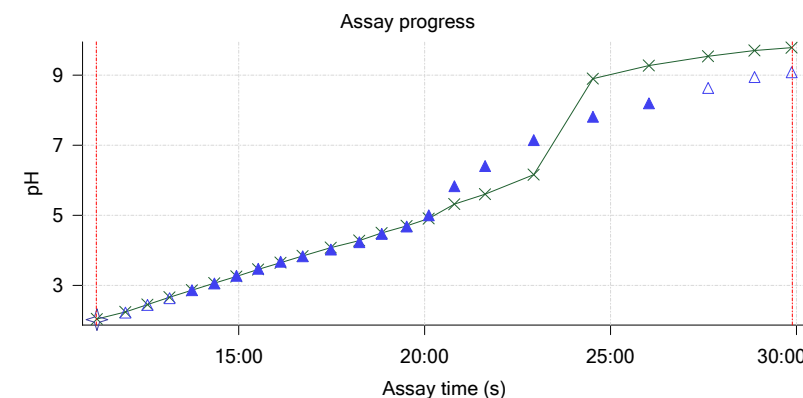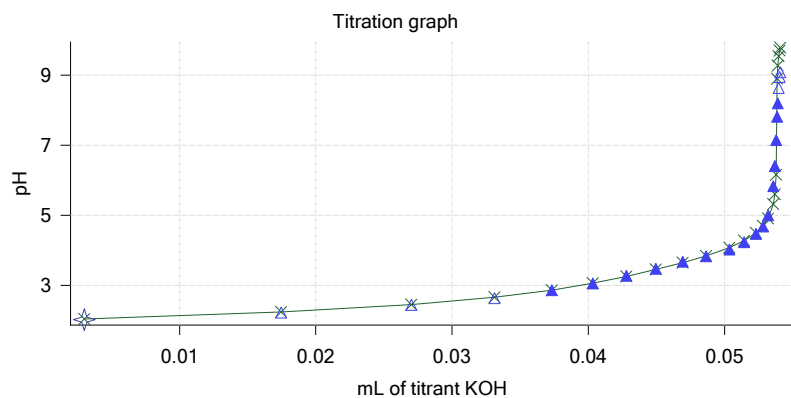

Sample name: **M11\_octanol**  
 Assay name: **pH-metric high logP**  
 Assay ID: **18C-01001**  
 Filename: **C:\Sirius\_T3\Mehtap\20180228\_exp28\_logP\_T3-2\18C-01001\_M11\_octanol\_pH-metric high logP.t3r**

Experiment start time: **3/1/2018 12:11:22 AM**  
 Analyst: **Pion**  
 Instrument ID: **T312060**

## Other graphs (continued)

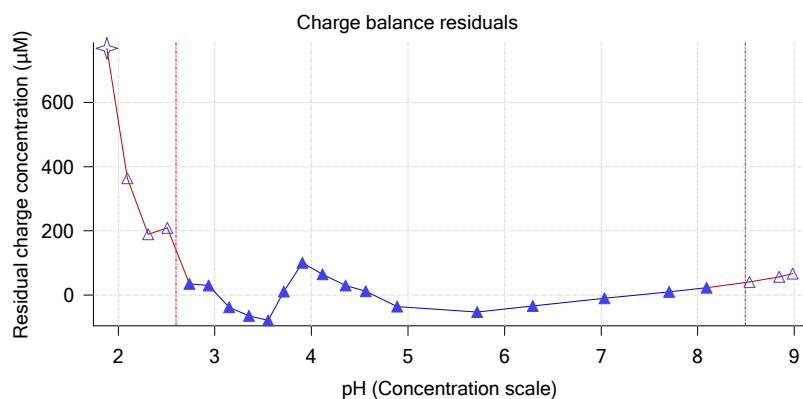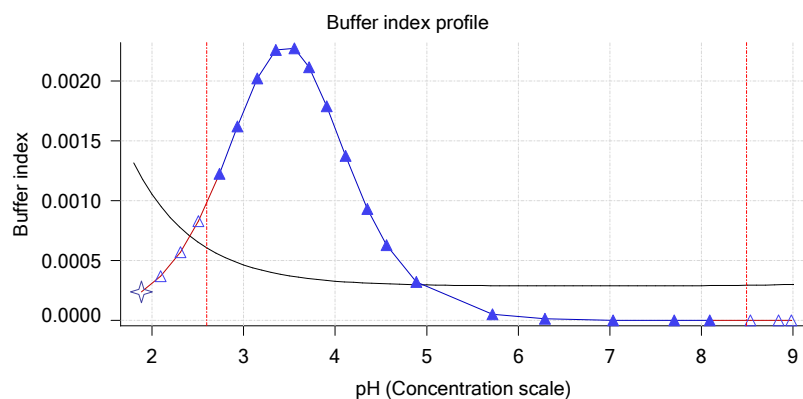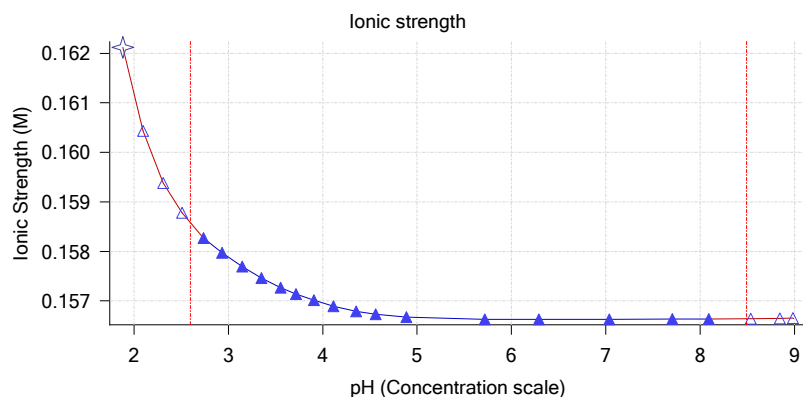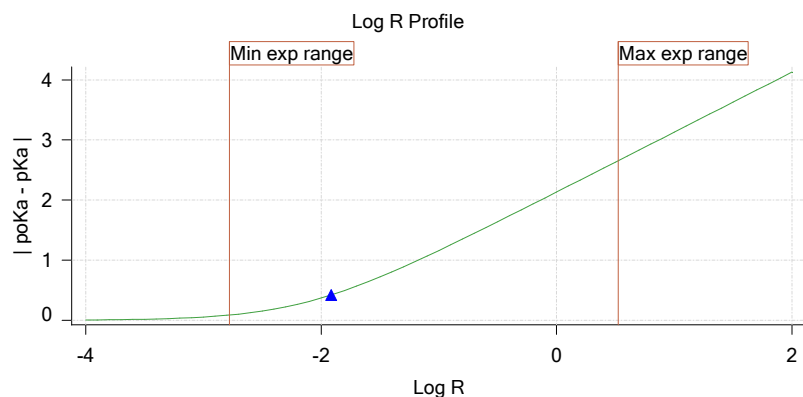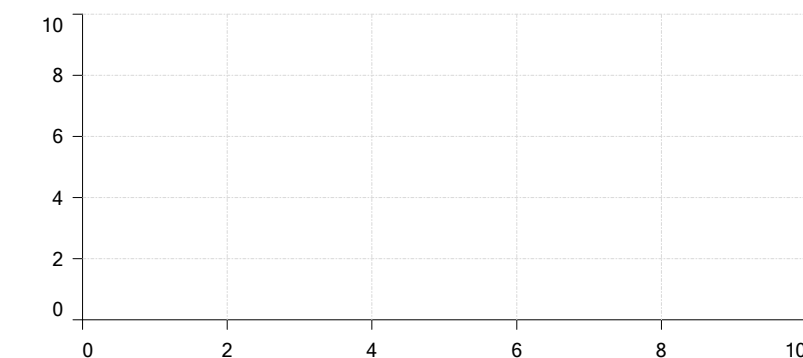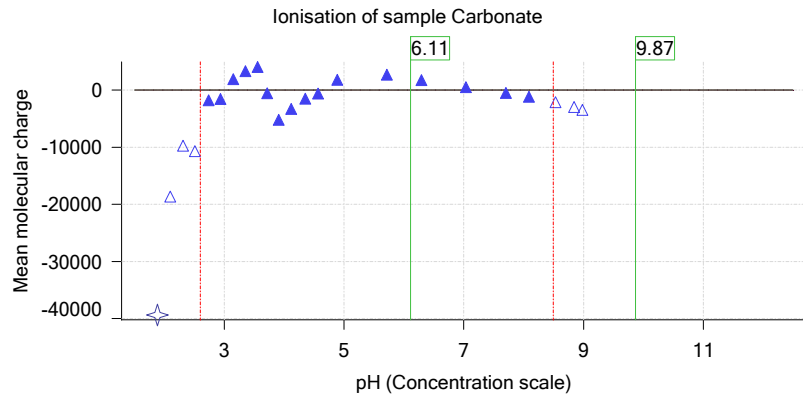

Sample name: **M11\_octanol**  
 Assay name: **pH-metric high logP**  
 Assay ID: **18C-01001**  
 Filename: **C:\Sirius\_T3\Mehtap\20180228\_exp28\_logP\_T3-2\18C-01001\_M11\_octanol\_pH-metric high logP.t3r**

Experiment start time: **3/1/2018 12:11:22 AM**  
 Analyst: **Pion**  
 Instrument ID: **T312060**

pH-metric high logP Titration 2 of 3 18C-01001 Points 24 to 48

## Overall results

RMSD 0.387  
 Average ionic strength 0.164 M  
 Average temperature 25.0°C  
 Partition ratio 0.0404 : 1  
 Analyte concentration range 3480.1 µM to 3596.9 µM  
 Total points considered 18 of 25

## Warnings and errors

Errors None  
 Warnings One or more logP values out of range

## Four-Plus parameters

|                                                                                |       |        |                      |                           |
|--------------------------------------------------------------------------------|-------|--------|----------------------|---------------------------|
|  | Alpha | 0.130  | 3/1/2018 12:11:22 AM | C:\Sirius_T3\HCl18B27.t3r |
|  | S     | 0.9970 | 3/1/2018 12:11:22 AM | C:\Sirius_T3\HCl18B27.t3r |
|  | jH    | 0.8    | 3/1/2018 12:11:22 AM | C:\Sirius_T3\HCl18B27.t3r |
|  | jOH   | -0.4   | 3/1/2018 12:11:22 AM | C:\Sirius_T3\HCl18B27.t3r |

## Titrants

|                                                                                 |            |          |                      |                           |
|---------------------------------------------------------------------------------|------------|----------|----------------------|---------------------------|
|   | 0.50 M HCl | 0.993513 | 3/1/2018 12:11:22 AM | C:\Sirius_T3\HCl18B27.t3r |
|  | 0.50 M KOH | 0.999845 | 3/1/2018 12:11:22 AM | C:\Sirius_T3\KOH18B27.t3r |

## Sample

|                                                                                  |                                  |       |
|----------------------------------------------------------------------------------|----------------------------------|-------|
|  | M11_octanol concentration factor | 0.912 |
|  | Base pKa 1                       | 3.89  |
|  | logP (XH +)                      | -4.46 |
|  | logP (neutral X)                 | 2.16  |

## Sample graphs

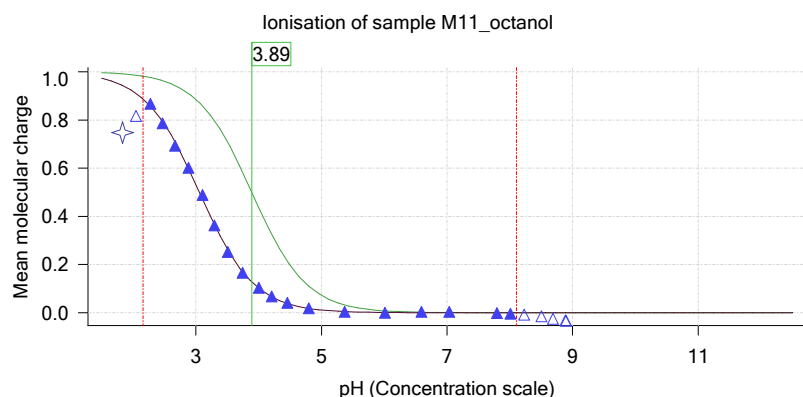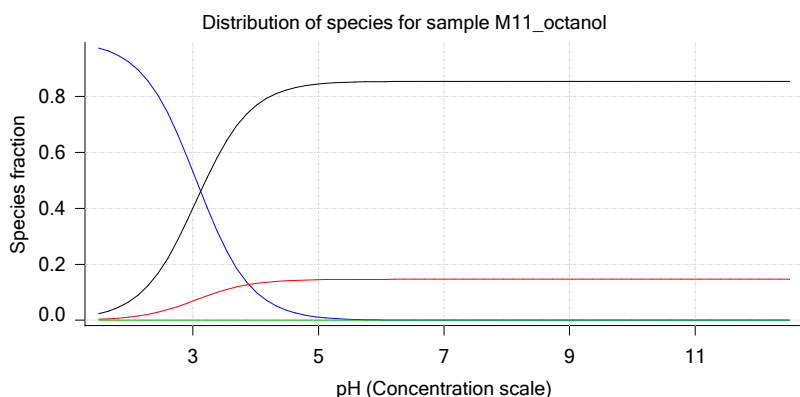

Sample name: **M11\_octanol**  
Assay name: **pH-metric high logP**  
Assay ID: **18C-01001**  
Filename: **C:\Sirius\_T3\Mehtap\20180228\_exp28\_logP\_T3-2\18C-01001\_M11\_octanol\_pH-metric high logP.t3r**

Experiment start time: **3/1/2018 12:11:22 AM**  
Analyst: **Pion**  
Instrument ID: **T312060**

## Sample graphs (continued)

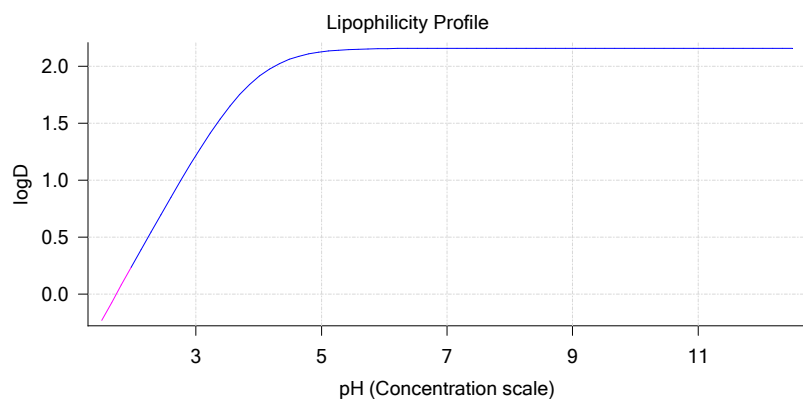

## Sample logD and percent species

| pH     | M11_octanol<br>logD | M11_octanol<br>M11_octanolH | M11_octanol<br>M11_octanol | M11_octanol<br>M11_octanolH* | M11_octanol<br>M11_octanol* | Comment    |
|--------|---------------------|-----------------------------|----------------------------|------------------------------|-----------------------------|------------|
| 1.000  | -0.73               | 99.13 %                     | 0.13 %                     | 0.00 %                       | 0.74 %                      | Stomach pH |
| 1.200  | -0.53               | 98.62 %                     | 0.20 %                     | 0.00 %                       | 1.17 %                      |            |
| 2.000  | 0.26                | 91.91 %                     | 1.18 %                     | 0.00 %                       | 6.90 %                      |            |
| 3.000  | 1.22                | 53.20 %                     | 6.85 %                     | 0.00 %                       | 39.94 %                     |            |
| 4.000  | 1.91                | 10.21 %                     | 13.15 %                    | 0.00 %                       | 76.64 %                     |            |
| 5.000  | 2.13                | 1.12 %                      | 14.48 %                    | 0.00 %                       | 84.40 %                     | Blood pH   |
| 6.000  | 2.16                | 0.11 %                      | 14.63 %                    | 0.00 %                       | 85.26 %                     |            |
| 6.500  | 2.16                | 0.04 %                      | 14.64 %                    | 0.00 %                       | 85.32 %                     |            |
| 7.000  | 2.16                | 0.01 %                      | 14.64 %                    | 0.00 %                       | 85.34 %                     |            |
| 7.400  | 2.16                | 0.00 %                      | 14.64 %                    | 0.00 %                       | 85.35 %                     |            |
| 8.000  | 2.16                | 0.00 %                      | 14.65 %                    | 0.00 %                       | 85.35 %                     |            |
| 9.000  | 2.16                | 0.00 %                      | 14.65 %                    | 0.00 %                       | 85.35 %                     |            |
| 10.000 | 2.16                | 0.00 %                      | 14.65 %                    | 0.00 %                       | 85.35 %                     |            |
| 11.000 | 2.16                | 0.00 %                      | 14.65 %                    | 0.00 %                       | 85.35 %                     |            |
| 12.000 | 2.16                | 0.00 %                      | 14.65 %                    | 0.00 %                       | 85.35 %                     |            |

## Carbonate and acidity

Carbonate 0.096 mM  
Acidity error -0.306 mM

## Other graphs

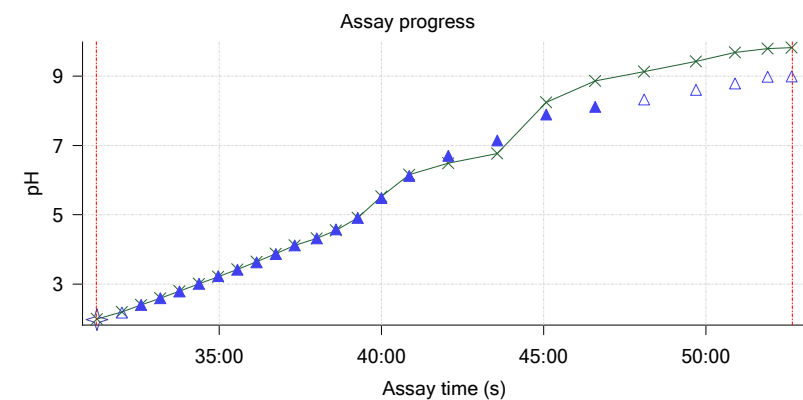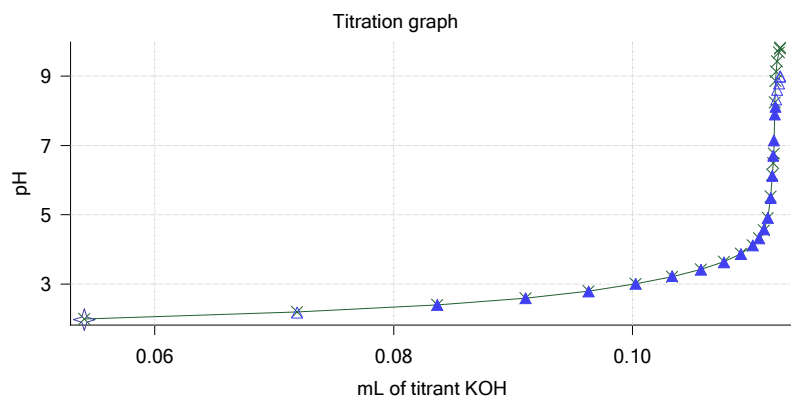



Sample name: **M11\_octanol**  
 Assay name: **pH-metric high logP**  
 Assay ID: **18C-01001**  
 Filename: **C:\Sirius\_T3\Mehtap\20180228\_exp28\_logP\_T3-2\18C-01001\_M11\_octanol\_pH-metric high logP.t3r**

Experiment start time: **3/1/2018 12:11:22 AM**  
 Analyst: **Pion**  
 Instrument ID: **T312060**

## Other graphs (continued)

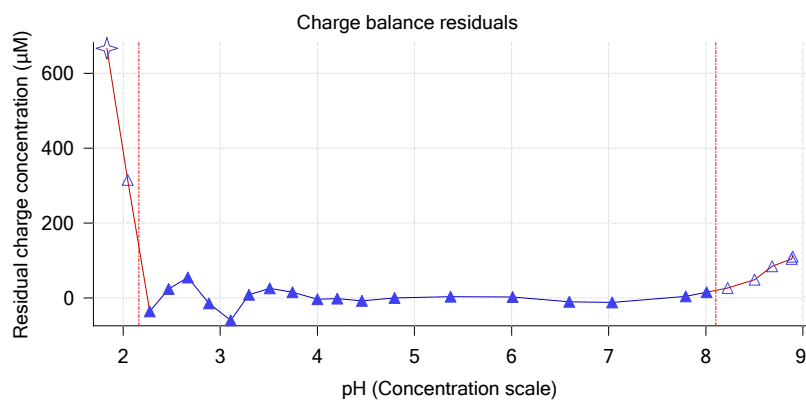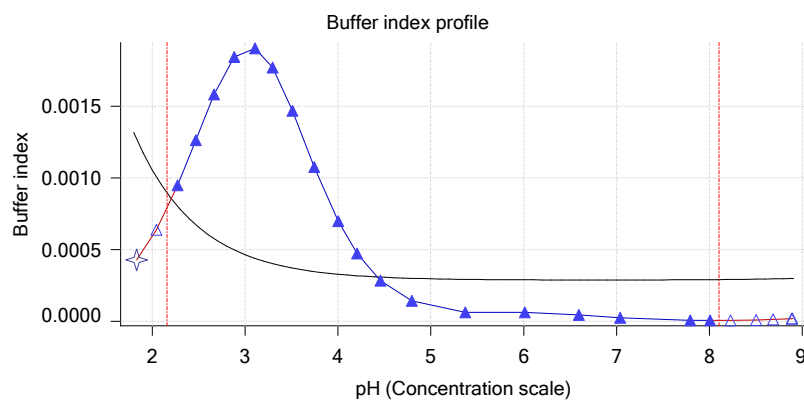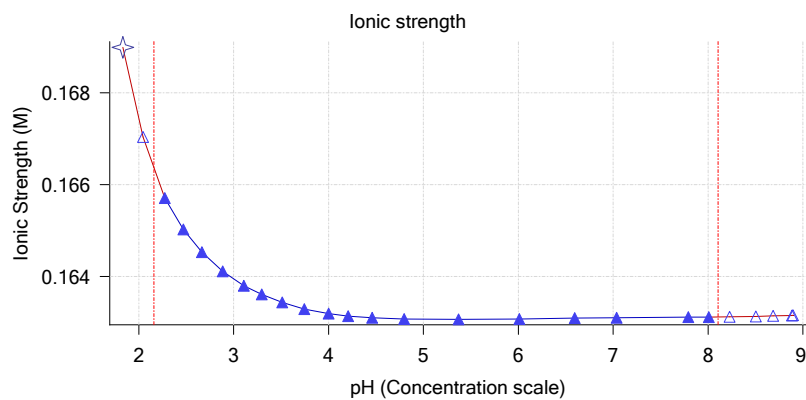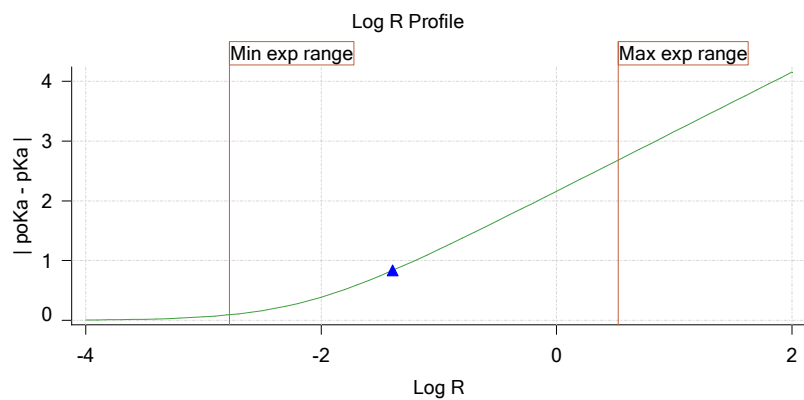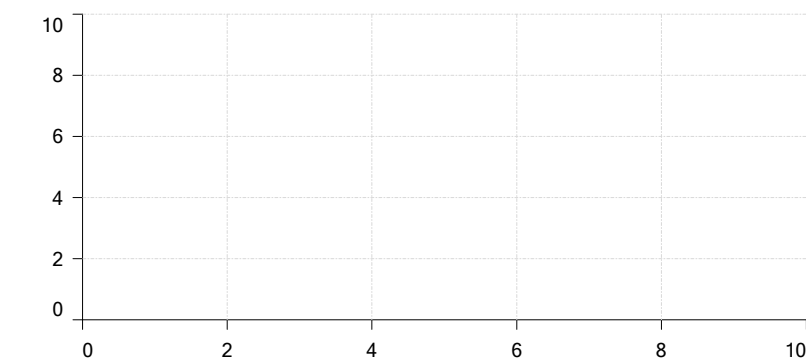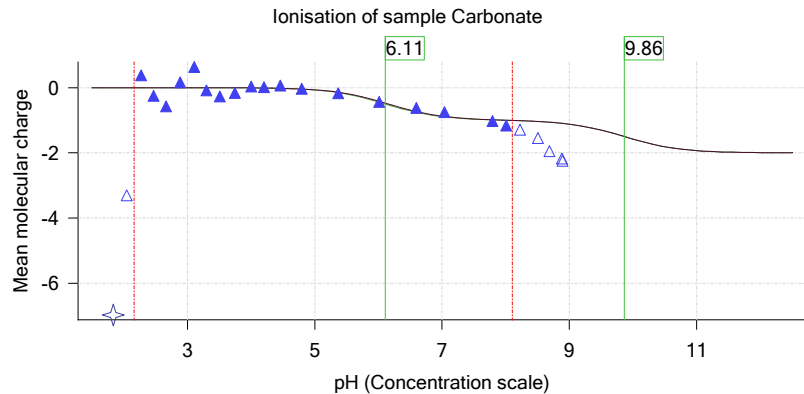

Sample name: **M11\_octanol**  
 Assay name: **pH-metric high logP**  
 Assay ID: **18C-01001**  
 Filename: **C:\Sirius\_T3\Mehtap\20180228\_exp28\_logP\_T3-2\18C-01001\_M11\_octanol\_pH-metric high logP.t3r**

Experiment start time: **3/1/2018 12:11:22 AM**  
 Analyst: **Pion**  
 Instrument ID: **T312060**

pH-metric high logP Titration 3 of 3 18C-01001 Points 49 to 69

## Overall results

RMSD 0.050  
 Average ionic strength 0.170 M  
 Average temperature 25.0°C  
 Partition ratio 0.1189 : 1  
 Analyte concentration range 3013.9 µM to 3107.7 µM  
 Total points considered 18 of 21

## Warnings and errors

Errors None  
 Warnings One or more logP values out of range

## Four-Plus parameters

Alpha 0.130 3/1/2018 12:11:22 AM C:\Sirius\_T3\HCl18B27.t3r  
 S 0.9970 3/1/2018 12:11:22 AM C:\Sirius\_T3\HCl18B27.t3r  
 jH 0.8 3/1/2018 12:11:22 AM C:\Sirius\_T3\HCl18B27.t3r  
 jOH -0.4 3/1/2018 12:11:22 AM C:\Sirius\_T3\HCl18B27.t3r

## Titrants

0.50 M HCl 0.993513 3/1/2018 12:11:22 AM C:\Sirius\_T3\HCl18B27.t3r  
 0.50 M KOH 0.999845 3/1/2018 12:11:22 AM C:\Sirius\_T3\KOH18B27.t3r

## Sample

M11\_octanol concentration factor 0.792  
 Base pKa 1 3.89  
 logP (XH +) -5.10  
 logP (neutral X) 2.01

## Sample graphs

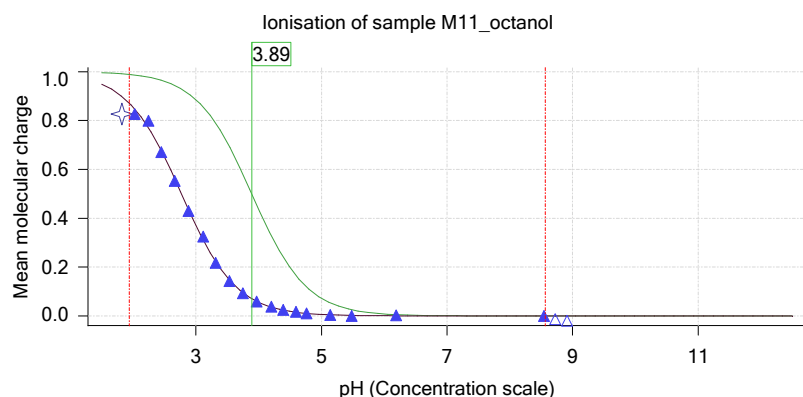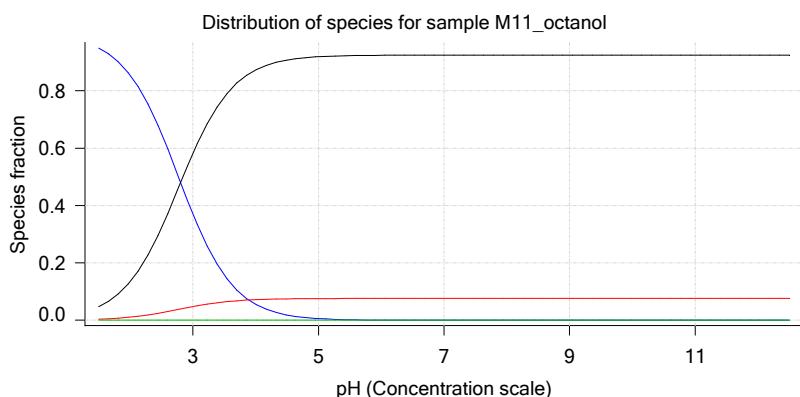

Sample name: **M11\_octanol**  
Assay name: **pH-metric high logP**  
Assay ID: **18C-01001**  
Filename: **C:\Sirius\_T3\Mehtap\20180228\_exp28\_logP\_T3-2\18C-01001\_M11\_octanol\_pH-metric high logP.t3r**

Experiment start time: **3/1/2018 12:11:22 AM**  
Analyst: **Pion**  
Instrument ID: **T312060**

## Sample graphs (continued)

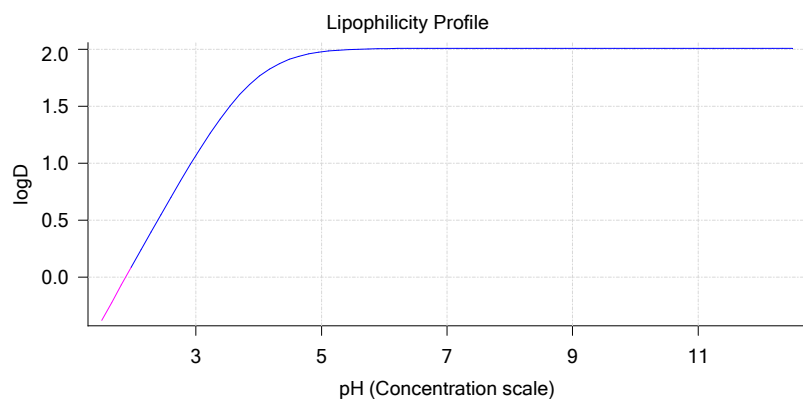

## Sample logD and percent species

| pH     | M11_octanol<br>logD | M11_octanol<br>M11_octanolH | M11_octanol<br>M11_octanol | M11_octanol<br>M11_octanolH* | M11_octanol<br>M11_octanol* | Comment    |
|--------|---------------------|-----------------------------|----------------------------|------------------------------|-----------------------------|------------|
| 1.000  | -0.88               | 98.33 %                     | 0.13 %                     | 0.00 %                       | 1.54 %                      | Stomach pH |
| 1.200  | -0.68               | 97.38 %                     | 0.20 %                     | 0.00 %                       | 2.42 %                      |            |
| 2.000  | 0.11                | 85.51 %                     | 1.10 %                     | 0.00 %                       | 13.39 %                     |            |
| 3.000  | 1.07                | 37.11 %                     | 4.78 %                     | 0.00 %                       | 58.11 %                     |            |
| 4.000  | 1.76                | 5.57 %                      | 7.18 %                     | 0.00 %                       | 87.25 %                     |            |
| 5.000  | 1.98                | 0.59 %                      | 7.56 %                     | 0.00 %                       | 91.86 %                     | Blood pH   |
| 6.000  | 2.01                | 0.06 %                      | 7.60 %                     | 0.00 %                       | 92.34 %                     |            |
| 6.500  | 2.01                | 0.02 %                      | 7.60 %                     | 0.00 %                       | 92.38 %                     |            |
| 7.000  | 2.01                | 0.01 %                      | 7.60 %                     | 0.00 %                       | 92.39 %                     |            |
| 7.400  | 2.01                | 0.00 %                      | 7.60 %                     | 0.00 %                       | 92.40 %                     |            |
| 8.000  | 2.01                | 0.00 %                      | 7.60 %                     | 0.00 %                       | 92.40 %                     |            |
| 9.000  | 2.01                | 0.00 %                      | 7.60 %                     | 0.00 %                       | 92.40 %                     |            |
| 10.000 | 2.01                | 0.00 %                      | 7.60 %                     | 0.00 %                       | 92.40 %                     |            |
| 11.000 | 2.01                | 0.00 %                      | 7.60 %                     | 0.00 %                       | 92.40 %                     |            |
| 12.000 | 2.01                | 0.00 %                      | 7.60 %                     | 0.00 %                       | 92.40 %                     |            |

## Carbonate and acidity

Carbonate 0.073 mM  
Acidity error -0.819 mM

## Other graphs

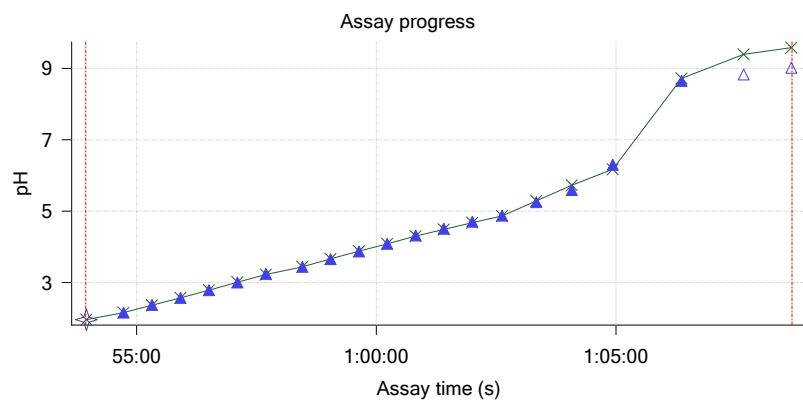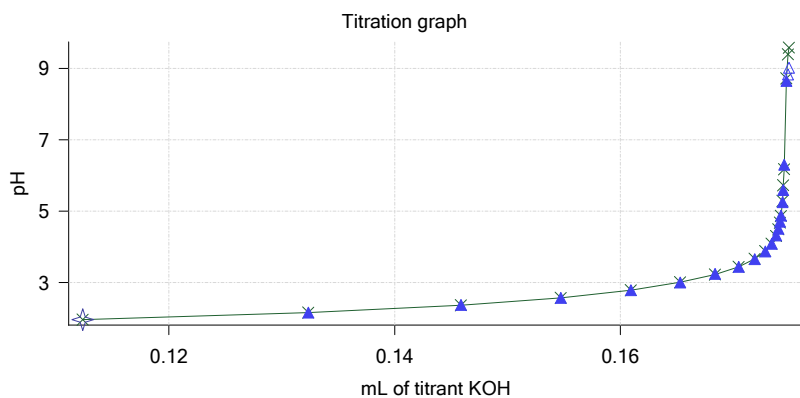

Sample name: **M11\_octanol**  
 Assay name: **pH-metric high logP**  
 Assay ID: **18C-01001**  
 Filename: **C:\Sirius\_T3\Mehtap\20180228\_exp28\_logP\_T3-2\18C-01001\_M11\_octanol\_pH-metric high logP.t3r**

Experiment start time: **3/1/2018 12:11:22 AM**  
 Analyst: **Pion**  
 Instrument ID: **T312060**

## Other graphs (continued)

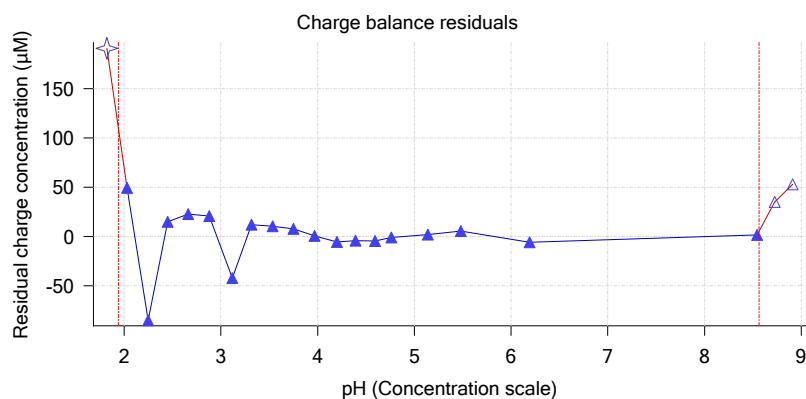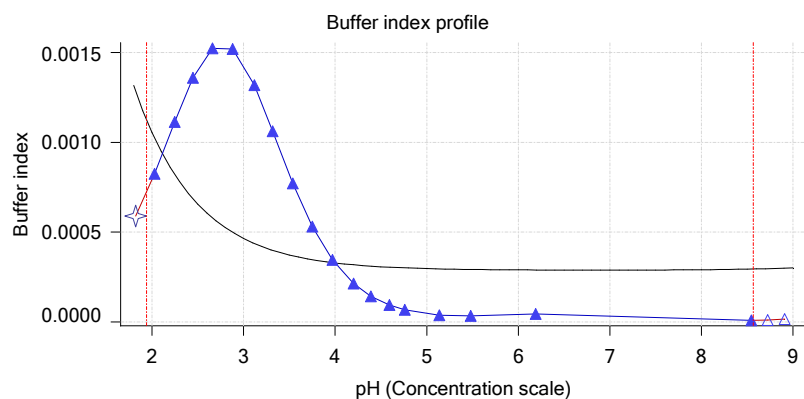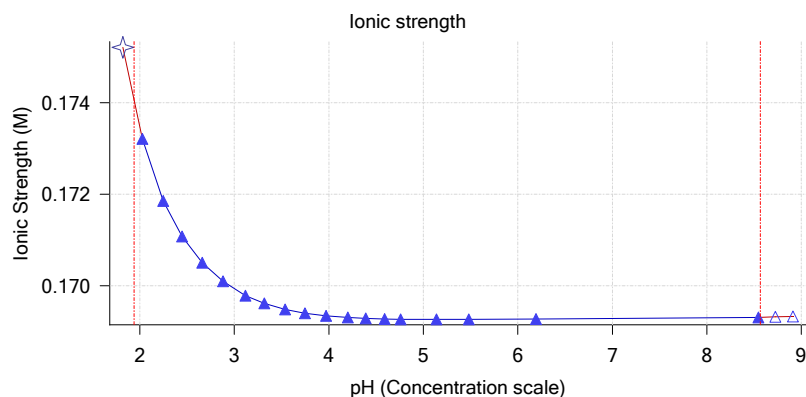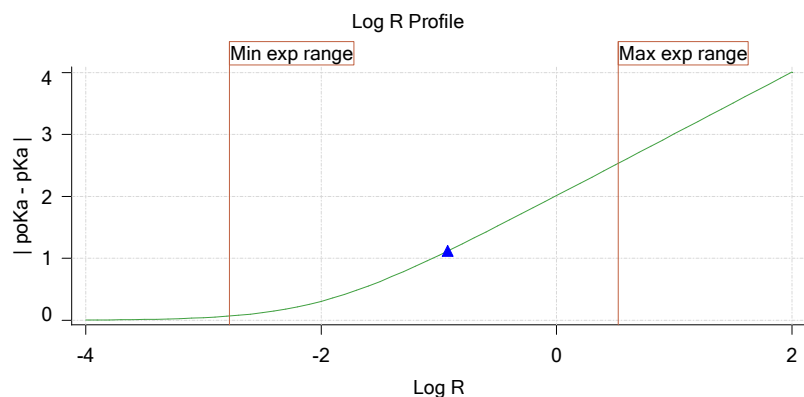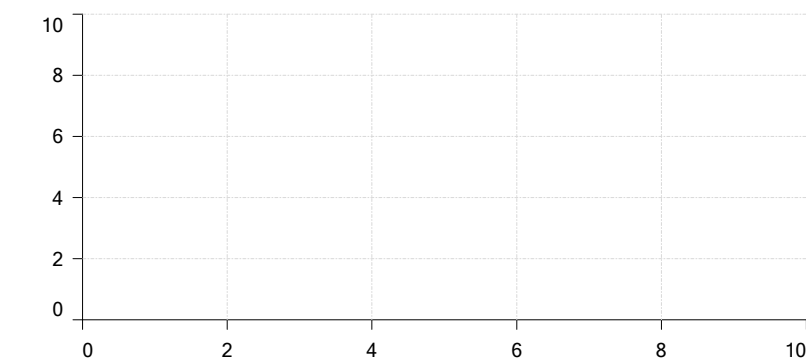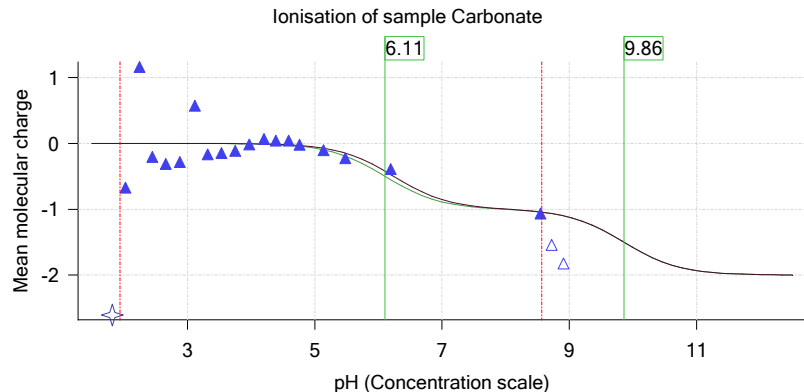

Sample name: **M11\_octanol**  
 Assay name: **pH-metric high logP**  
 Assay ID: **18C-01001**  
 Filename: **C:\Sirius\_T3\Mehtap\20180228\_exp28\_logP\_T3-2\18C-01001\_M11\_octanol\_pH-metric high logP.t3r**

Experiment start time: **3/1/2018 12:11:22 AM**  
 Analyst: **Pion**  
 Instrument ID: **T312060**

## Assay Model

| Settings                          | Value        | Date/Time changed    | Imported from      |
|-----------------------------------|--------------|----------------------|--------------------|
| Sample name                       | M11_octanol  | 2/27/2018 4:54:30 PM | User entered value |
| Sample by                         | Weight       |                      | Default value      |
| Sample weight                     | 0.001320 g   | 2/28/2018 4:24:52 PM | User entered value |
| Formula weight                    | 211.22 g/mol | 2/27/2018 4:54:30 PM | User entered value |
| Solubility                        | Unknown      |                      | Default value      |
| Molecular weight                  | 211.22       | 2/27/2018 4:54:30 PM | User entered value |
| Individual pKa ionic environments | No           |                      | Default value      |
| Number of pKas                    | 1            | 2/27/2018 4:54:30 PM | User entered value |
| Sample is a                       | Base         | 2/27/2018 4:54:30 PM | User entered value |
| pKa 1                             | 3.89         | 2/27/2018 4:54:30 PM | User entered value |
| logp (XH +)                       | -5.60        | 2/28/2018 1:53:21 PM | User entered value |
| logP (neutral X)                  | 2.09         | 2/28/2018 1:53:11 PM | User entered value |

## Events

| Time    | Event             | Water      | Acid       | Base       | Octanol    | pH    | dpH/dt   | pH R-squared | pH SD   | dpH/dt time         |
|---------|-------------------|------------|------------|------------|------------|-------|----------|--------------|---------|---------------------|
| 8:11.4  | Initial pH = 9.64 |            |            |            |            |       |          |              |         |                     |
| 11:11.0 | Data point 1      | 1.50000 mL | 0.05407 mL | 0.00301 mL | 0.01999 mL | 2.018 | -0.00907 | 0.79017      | 0.00050 | 10.0 s              |
| 11:57.2 | Data point 2      | 1.50000 mL | 0.05407 mL | 0.01745 mL | 0.01999 mL | 2.225 | -0.00501 | 0.21160      | 0.00054 | 10.0 s              |
| 12:32.9 | Data point 3      | 1.50000 mL | 0.05407 mL | 0.02702 mL | 0.01999 mL | 2.438 | -0.00560 | 0.18844      | 0.00064 | 10.0 s              |
| 13:08.5 | Data point 4      | 1.50000 mL | 0.05407 mL | 0.03311 mL | 0.01999 mL | 2.633 | -0.00265 | 0.48730      | 0.00019 | 10.5 s              |
| 13:44.5 | Data point 5      | 1.50000 mL | 0.05407 mL | 0.03732 mL | 0.01999 mL | 2.860 | -0.01106 | 0.66289      | 0.00067 | 10.5 s              |
| 14:20.5 | Data point 6      | 1.50000 mL | 0.05407 mL | 0.04033 mL | 0.01999 mL | 3.057 | -0.01232 | 0.47963      | 0.00088 | 10.0 s              |
| 14:56.0 | Data point 7      | 1.50000 mL | 0.05407 mL | 0.04280 mL | 0.01999 mL | 3.270 | -0.00677 | 0.19054      | 0.00077 | 10.0 s              |
| 15:31.5 | Data point 8      | 1.50000 mL | 0.05407 mL | 0.04497 mL | 0.01999 mL | 3.472 | -0.00166 | 0.35149      | 0.00014 | 10.5 s              |
| 16:07.5 | Data point 9      | 1.50000 mL | 0.05407 mL | 0.04692 mL | 0.01999 mL | 3.673 | -0.00781 | 0.35544      | 0.00065 | 10.0 s              |
| 16:42.9 | Data point 10     | 1.50000 mL | 0.05407 mL | 0.04864 mL | 0.01999 mL | 3.835 | -0.01388 | 0.51424      | 0.00096 | 10.0 s              |
| 17:28.7 | Data point 11     | 1.50000 mL | 0.05407 mL | 0.05035 mL | 0.01999 mL | 4.027 | -0.01025 | 0.38200      | 0.00082 | 10.0 s              |
| 18:14.5 | Data point 12     | 1.50000 mL | 0.05407 mL | 0.05143 mL | 0.01999 mL | 4.232 | -0.00787 | 0.92490      | 0.00040 | 10.5 s              |
| 18:50.5 | Data point 13     | 1.50000 mL | 0.05407 mL | 0.05230 mL | 0.01999 mL | 4.470 | -0.00601 | 0.45130      | 0.00044 | 10.0 s              |
| 19:31.0 | Data point 14     | 1.50000 mL | 0.05407 mL | 0.05282 mL | 0.01999 mL | 4.679 | -0.00976 | 0.57077      | 0.00064 | 10.0 s              |
| 20:06.4 | Data point 15     | 1.50000 mL | 0.05407 mL | 0.05320 mL | 0.01999 mL | 5.003 | -0.01866 | 0.86396      | 0.00099 | 11.0 s              |
| 20:48.0 | Data point 16     | 1.50000 mL | 0.05407 mL | 0.05357 mL | 0.01999 mL | 5.829 | -0.01903 | 0.91633      | 0.00098 | 19.0 s              |
| 21:37.5 | Data point 17     | 1.50000 mL | 0.05407 mL | 0.05369 mL | 0.01999 mL | 6.403 | -0.02005 | 0.98528      | 0.00100 | 42.5 s              |
| 22:55.8 | Data point 18     | 1.50000 mL | 0.05407 mL | 0.05379 mL | 0.01999 mL | 7.144 | -0.04872 | 0.99706      | 0.00241 | Timed out at 59.5 s |
| 24:31.4 | Data point 19     | 1.50000 mL | 0.05407 mL | 0.05386 mL | 0.01999 mL | 7.810 | -0.04860 | 0.99788      | 0.00240 | Timed out at 59.5 s |
| 26:01.9 | Data point 20     | 1.50000 mL | 0.05407 mL | 0.05390 mL | 0.01999 mL | 8.196 | -0.02409 | 0.99122      | 0.00119 | Timed out at 59.5 s |
| 27:37.5 | Data point 21     | 1.50000 mL | 0.05407 mL | 0.05397 mL | 0.01999 mL | 8.638 | -0.02003 | 0.99205      | 0.00099 | 39.0 s              |
| 28:52.2 | Data point 22     | 1.50000 mL | 0.05407 mL | 0.05405 mL | 0.01999 mL | 8.945 | -0.02002 | 0.98473      | 0.00100 | 29.5 s              |
| 29:52.2 | Data point 23     | 1.50000 mL | 0.05407 mL | 0.05409 mL | 0.01999 mL | 9.084 | -0.01992 | 0.97892      | 0.00099 | 22.5 s              |
| 31:14.1 | Data point 24     | 1.50000 mL | 0.11336 mL | 0.05409 mL | 0.06999 mL | 1.969 | -0.01287 | 0.76123      | 0.00073 | 10.0 s              |
| 32:00.4 | Data point 25     | 1.50000 mL | 0.11336 mL | 0.07192 mL | 0.06999 mL | 2.176 | -0.00432 | 0.09399      | 0.00070 | 10.0 s              |
| 32:36.1 | Data point 26     | 1.50000 mL | 0.11336 mL | 0.08365 mL | 0.06999 mL | 2.402 | 0.00539  | 0.49157      | 0.00038 | 10.0 s              |
| 33:11.7 | Data point 27     | 1.50000 mL | 0.11336 mL | 0.09104 mL | 0.06999 mL | 2.594 | -0.00764 | 0.16492      | 0.00093 | 10.0 s              |
| 33:47.2 | Data point 28     | 1.50000 mL | 0.11336 mL | 0.09631 mL | 0.06999 mL | 2.790 | -0.00104 | 0.07057      | 0.00019 | 10.0 s              |
| 34:22.7 | Data point 29     | 1.50000 mL | 0.11336 mL | 0.10026 mL | 0.06999 mL | 3.007 | -0.00433 | 0.31139      | 0.00038 | 10.0 s              |
| 34:58.2 | Data point 30     | 1.50000 mL | 0.11336 mL | 0.10332 mL | 0.06999 mL | 3.227 | -0.00212 | 0.02826      | 0.00062 | 10.0 s              |
| 35:33.8 | Data point 31     | 1.50000 mL | 0.11336 mL | 0.10572 mL | 0.06999 mL | 3.417 | 0.00173  | 0.09499      | 0.00028 | 10.0 s              |
| 36:09.3 | Data point 32     | 1.50000 mL | 0.11336 mL | 0.10764 mL | 0.06999 mL | 3.630 | -0.00346 | 0.60333      | 0.00022 | 10.0 s              |
| 36:44.7 | Data point 33     | 1.50000 mL | 0.11336 mL | 0.10908 mL | 0.06999 mL | 3.864 | -0.00645 | 0.48290      | 0.00046 | 10.0 s              |
| 37:20.1 | Data point 34     | 1.50000 mL | 0.11336 mL | 0.11007 mL | 0.06999 mL | 4.119 | -0.00379 | 0.54985      | 0.00025 | 10.0 s              |
| 38:00.7 | Data point 35     | 1.50000 mL | 0.11336 mL | 0.11061 mL | 0.06999 mL | 4.322 | -0.00366 | 0.30464      | 0.00033 | 10.0 s              |
| 38:36.1 | Data point 36     | 1.50000 mL | 0.11336 mL | 0.11101 mL | 0.06999 mL | 4.575 | -0.01448 | 0.78873      | 0.00080 | 10.0 s              |
| 39:16.6 | Data point 37     | 1.50000 mL | 0.11336 mL | 0.11134 mL | 0.06999 mL | 4.912 | -0.01854 | 0.87629      | 0.00098 | 13.0 s              |

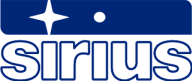

## Assay Events

Sample name: **M11\_octanol**  
Assay name: **pH-metric high logP**  
Assay ID: **18C-01001**  
Filename: **C:\Sirius\_T3\Mehtap\20180228\_exp28\_logP\_T3-2\18C-01001\_M11\_octanol\_pH-metric high logP.t3r**

Experiment start time: **3/1/2018 12:11:22 AM**  
Analyst: **Pion**  
Instrument ID: **T312060**

## Events (continued)

| Time      | Event         | Water      | Acid       | Base       | Octanol    | pH    | dpH/dt   | pH R-squared | pH SD   | dpH/dt time         |
|-----------|---------------|------------|------------|------------|------------|-------|----------|--------------|---------|---------------------|
| 40:00.2   | Data point 38 | 1.50000 mL | 0.11336 mL | 0.11157 mL | 0.06999 mL | 5.485 | -0.01247 | 0.47642      | 0.00089 | 16.0 s              |
| 40:51.8   | Data point 39 | 1.50000 mL | 0.11336 mL | 0.11171 mL | 0.06999 mL | 6.124 | -0.01978 | 0.97231      | 0.00099 | 36.5 s              |
| 42:04.0   | Data point 40 | 1.50000 mL | 0.11336 mL | 0.11178 mL | 0.06999 mL | 6.704 | -0.02890 | 0.99478      | 0.00143 | Timed out at 59.5 s |
| 43:34.5   | Data point 41 | 1.50000 mL | 0.11336 mL | 0.11183 mL | 0.06999 mL | 7.146 | -0.04871 | 0.99489      | 0.00241 | Timed out at 59.5 s |
| 45:05.1   | Data point 42 | 1.50000 mL | 0.11336 mL | 0.11192 mL | 0.06999 mL | 7.900 | -0.05502 | 0.99571      | 0.00272 | Timed out at 59.5 s |
| 46:35.6   | Data point 43 | 1.50000 mL | 0.11336 mL | 0.11197 mL | 0.06999 mL | 8.113 | -0.02606 | 0.99186      | 0.00129 | Timed out at 59.5 s |
| 48:06.1   | Data point 44 | 1.50000 mL | 0.11336 mL | 0.11202 mL | 0.06999 mL | 8.331 | -0.01989 | 0.98982      | 0.00099 | 55.0 s              |
| 49:41.9   | Data point 45 | 1.50000 mL | 0.11336 mL | 0.11211 mL | 0.06999 mL | 8.608 | -0.01909 | 0.97284      | 0.00096 | 31.0 s              |
| 50:53.8   | Data point 46 | 1.50000 mL | 0.11336 mL | 0.11225 mL | 0.06999 mL | 8.789 | -0.01955 | 0.99182      | 0.00097 | 25.0 s              |
| 51:54.4   | Data point 47 | 1.50000 mL | 0.11336 mL | 0.11235 mL | 0.06999 mL | 8.987 | -0.01750 | 0.90247      | 0.00091 | 19.0 s              |
| 52:38.8   | Data point 48 | 1.50000 mL | 0.11336 mL | 0.11237 mL | 0.06999 mL | 8.997 | -0.01930 | 0.96484      | 0.00097 | 16.5 s              |
| 53:57.2   | Data point 49 | 1.50000 mL | 0.17855 mL | 0.11237 mL | 0.21999 mL | 1.958 | -0.00753 | 0.72606      | 0.00044 | 10.0 s              |
| 54:43.6   | Data point 50 | 1.50000 mL | 0.17855 mL | 0.13236 mL | 0.21999 mL | 2.160 | -0.00028 | 0.00344      | 0.00023 | 10.0 s              |
| 55:19.4   | Data point 51 | 1.50000 mL | 0.17855 mL | 0.14588 mL | 0.21999 mL | 2.375 | 0.00030  | 0.00453      | 0.00022 | 10.0 s              |
| 55:55.0   | Data point 52 | 1.50000 mL | 0.17855 mL | 0.15473 mL | 0.21999 mL | 2.574 | -0.00751 | 0.16614      | 0.00091 | 10.0 s              |
| 56:30.6   | Data point 53 | 1.50000 mL | 0.17855 mL | 0.16091 mL | 0.21999 mL | 2.786 | -0.00360 | 0.47623      | 0.00026 | 10.0 s              |
| 57:06.1   | Data point 54 | 1.50000 mL | 0.17855 mL | 0.16529 mL | 0.21999 mL | 3.003 | 0.00336  | 0.12158      | 0.00048 | 10.0 s              |
| 57:41.6   | Data point 55 | 1.50000 mL | 0.17855 mL | 0.16837 mL | 0.21999 mL | 3.241 | -0.01332 | 0.90714      | 0.00069 | 10.0 s              |
| 58:27.4   | Data point 56 | 1.50000 mL | 0.17855 mL | 0.17046 mL | 0.21999 mL | 3.438 | -0.00073 | 0.01099      | 0.00034 | 10.0 s              |
| 59:02.8   | Data point 57 | 1.50000 mL | 0.17855 mL | 0.17190 mL | 0.21999 mL | 3.656 | -0.00412 | 0.83143      | 0.00022 | 10.0 s              |
| 59:38.3   | Data point 58 | 1.50000 mL | 0.17855 mL | 0.17281 mL | 0.21999 mL | 3.868 | -0.00343 | 0.75983      | 0.00019 | 10.0 s              |
| 1:00:13.7 | Data point 59 | 1.50000 mL | 0.17855 mL | 0.17340 mL | 0.21999 mL | 4.088 | -0.00449 | 0.80203      | 0.00025 | 10.0 s              |
| 1:00:49.1 | Data point 60 | 1.50000 mL | 0.17855 mL | 0.17378 mL | 0.21999 mL | 4.318 | -0.00344 | 0.13702      | 0.00046 | 10.0 s              |
| 1:01:24.5 | Data point 61 | 1.50000 mL | 0.17855 mL | 0.17399 mL | 0.21999 mL | 4.508 | -0.01637 | 0.76668      | 0.00092 | 10.0 s              |
| 1:01:59.9 | Data point 62 | 1.50000 mL | 0.17855 mL | 0.17413 mL | 0.21999 mL | 4.709 | -0.01145 | 0.54777      | 0.00076 | 12.0 s              |
| 1:02:37.3 | Data point 63 | 1.50000 mL | 0.17855 mL | 0.17422 mL | 0.21999 mL | 4.876 | -0.00617 | 0.20813      | 0.00067 | 12.5 s              |
| 1:03:20.3 | Data point 64 | 1.50000 mL | 0.17855 mL | 0.17434 mL | 0.21999 mL | 5.253 | -0.01491 | 0.67066      | 0.00090 | 14.0 s              |
| 1:04:04.7 | Data point 65 | 1.50000 mL | 0.17855 mL | 0.17441 mL | 0.21999 mL | 5.593 | -0.01977 | 0.97774      | 0.00099 | 20.5 s              |
| 1:04:55.7 | Data point 66 | 1.50000 mL | 0.17855 mL | 0.17448 mL | 0.21999 mL | 6.302 | -0.01947 | 0.98219      | 0.00097 | 55.5 s              |
| 1:06:21.7 | Data point 67 | 1.50000 mL | 0.17855 mL | 0.17469 mL | 0.21999 mL | 8.648 | -0.01798 | 0.88440      | 0.00094 | 37.0 s              |
| 1:07:39.6 | Data point 68 | 1.50000 mL | 0.17855 mL | 0.17483 mL | 0.21999 mL | 8.828 | -0.01767 | 0.82826      | 0.00096 | 24.0 s              |
| 1:08:39.2 | Data point 69 | 1.50000 mL | 0.17855 mL | 0.17493 mL | 0.21999 mL | 9.013 | -0.01774 | 0.89128      | 0.00093 | 16.0 s              |
| 1:09:04.2 | Assay volumes | 1.50000 mL | 0.17855 mL | 0.17493 mL | 0.21999 mL |       |          |              |         |                     |

Sample name: **M11\_octanol**  
 Assay name: **pH-metric high logP**  
 Assay ID: **18C-01001**  
 Filename: **C:\Sirius\_T3\Mehtap\20180228\_exp28\_logP\_T3-2\18C-01001\_M11\_octanol\_pH-metric high logP.t3r**

Experiment start time: **3/1/2018 12:11:22 AM**  
 Analyst: **Pion**  
 Instrument ID: **T312060**

## Assay Settings

| Setting                             | Value              | Original Value | Date/Time changed | Imported from |
|-------------------------------------|--------------------|----------------|-------------------|---------------|
| <b>General Settings</b>             |                    |                |                   |               |
| Analyst name                        | Pion               |                |                   |               |
| <b>Standard Experiment Settings</b> |                    |                |                   |               |
| Number of titrations                | 3                  |                |                   |               |
| Minimum pH                          | 2.000              |                |                   |               |
| Maximum pH                          | 9.000              |                |                   |               |
| pH step between points of           | 0.200              |                |                   |               |
| Minimum titrant addition            | 0.00002 mL         |                |                   |               |
| Maximum titrant addition            | 0.10000 mL         |                |                   |               |
| Argon flow rate                     | 100%               |                |                   |               |
| Start titration using               | Cautious pH adjust |                |                   |               |
| <b>Advanced General Settings</b>    |                    |                |                   |               |
| Detect turbidity using              | None               |                |                   |               |
| Collect turbidity sensor data       | No                 |                |                   |               |
| Collect UV spectra                  | No                 |                |                   |               |
| Stir after titrant addition for     | 5 seconds          |                |                   |               |
| For titrant addition, stir at       | 10%                |                |                   |               |
| <b>Titration Pre-Dose</b>           |                    |                |                   |               |
| Titration pre-dose                  | None               |                |                   |               |
| <b>Assay Medium</b>                 |                    |                |                   |               |
| ISA water volume                    | 1.50 mL            |                |                   |               |
| Water added                         | Automatic          |                |                   |               |
| Partition solvent type              | Octanol            |                |                   |               |
| Partition volume                    | 0.020 mL           |                |                   |               |
| Partition solvent added             | Automatic          |                |                   |               |
| After partition addition, stir for  | 1 seconds          |                |                   |               |
| <b>Sample Sonication</b>            |                    |                |                   |               |
| Sonicate                            | Yes                |                |                   |               |
| Adjust pH for sonication            | No                 |                |                   |               |
| Sonicate for                        | 300 seconds        |                |                   |               |
| After sonication stir for           | 5 seconds          |                |                   |               |
| <b>Sample Dissolution</b>           |                    |                |                   |               |
| Perform a dissolution stage         | Yes                |                |                   |               |
| Adjust and hold pH for dissolution  | To start pH        |                |                   |               |
| Stir to dissolve for                | 120 seconds        |                |                   |               |
| For dissolution, stir at            | 10%                |                |                   |               |
| <b>Carbonate purge</b>              |                    |                |                   |               |
| Perform a carbonate purge           | No                 |                |                   |               |
| <b>Temperature Control</b>          |                    |                |                   |               |
| Wait for temperature                | Yes                |                |                   |               |
| Required start temperature          | 25.0°C             |                |                   |               |
| Acceptable deviation                | 0.5°C              |                |                   |               |
| Time to wait                        | 60 seconds         |                |                   |               |
| Stir speed of                       | 50%                |                |                   |               |
| <b>Titration 1</b>                  |                    |                |                   |               |
| Titrate from                        | Low to high pH     |                |                   |               |
| Adjust to start pH                  | Yes                |                |                   |               |
| After pH adjust stir for            | 30 seconds         |                |                   |               |
| Stir to allow partitioning for      | 15 seconds         |                |                   |               |
| Stirrer speed for partitioning      | 50%                |                |                   |               |
| <b>Titration 2</b>                  |                    |                |                   |               |
| Titrate from                        | Low to high pH     |                |                   |               |
| Add additional water                | 0.00 mL            |                |                   |               |
| Additional partition solvent volume | 0.050 mL           |                |                   |               |
| Additional partition solvent added  | Automatic          |                |                   |               |
| After pH adjust stir for            | 30 seconds         |                |                   |               |
| Stir to allow partitioning for      | 15 seconds         |                |                   |               |
| Stirrer speed for partitioning      | 55%                |                |                   |               |



Sample name: **M11\_octanol**  
Assay name: **pH-metric high logP**  
Assay ID: **18C-01001**  
Filename: **C:\Sirius\_T3\Mehtap\20180228\_exp28\_logP\_T3-2\18C-01001\_M11\_octanol\_pH-metric high logP.t3r**

Experiment start time: **3/1/2018 12:11:22 AM**  
Analyst: **Pion**  
Instrument ID: **T312060**

## Assay Settings (continued)

| Setting                             | Value          | Original Value | Date/Time changed | Imported from |
|-------------------------------------|----------------|----------------|-------------------|---------------|
| <b>Titration 3</b>                  |                |                |                   |               |
| Titrate from                        | Low to high pH |                |                   |               |
| Add additional water                | 0.00 mL        |                |                   |               |
| Additional partition solvent volume | 0.150 mL       |                |                   |               |
| Additional partition solvent added  | Automatic      |                |                   |               |
| After pH adjust stir for            | 30 seconds     |                |                   |               |
| Stir to allow partitioning for      | 15 seconds     |                |                   |               |
| Stirrer speed for partitioning      | 60%            |                |                   |               |
| <b>Data Point Stability</b>         |                |                |                   |               |
| Stir during data point collection   | No             |                |                   |               |
| Delay before data point collection  | 0 seconds      |                |                   |               |
| Number of points to average         | 20 points      |                |                   |               |
| Time interval between points        | 0.50 seconds   |                |                   |               |
| Required maximum standard deviation | 0.00100 dpH/dt |                |                   |               |
| Stability timeout after             | 60 seconds     |                |                   |               |

## Calibration Settings

| Setting                   | Value  | Date/Time changed    | Imported from             |
|---------------------------|--------|----------------------|---------------------------|
| Four-Plus alpha           | 0.130  | 3/1/2018 12:11:22 AM | C:\Sirius_T3\HCl18B27.t3r |
| Four-Plus S               | 0.9970 | 3/1/2018 12:11:22 AM | C:\Sirius_T3\HCl18B27.t3r |
| Four-Plus jH              | 0.8    | 3/1/2018 12:11:22 AM | C:\Sirius_T3\HCl18B27.t3r |
| Four-Plus jOH             | -0.4   | 3/1/2018 12:11:22 AM | C:\Sirius_T3\HCl18B27.t3r |
| Base concentration factor | 1.000  | 3/1/2018 12:11:22 AM | C:\Sirius_T3\KOH18B27.t3r |
| Acid concentration factor | 0.994  | 3/1/2018 12:11:22 AM | C:\Sirius_T3\HCl18B27.t3r |

## Instrument Settings

| Setting              | Value                      | Batch Id    | Install date           |
|----------------------|----------------------------|-------------|------------------------|
| Instrument owner     | Merck                      |             |                        |
| Instrument ID        | T312060                    |             |                        |
| Instrument type      | T3 Simulator               |             |                        |
| Software version     | 1.1.3.0                    |             |                        |
| Dispenser module     |                            | T3DM1200361 | 3/31/2009 5:24:52 AM   |
| Dispenser 0          | Water                      |             | 3/31/2009 5:25:05 AM   |
| Syringe volume       | 2.5 mL                     |             |                        |
| Firmware version     | 1.2.1(r2)                  |             |                        |
| Titrant              | Water (0.15 M KCl)         | 02-06-2018  | 2/27/2018 10:05:59 AM  |
| Dispenser 2          | Acid                       |             | 3/31/2009 5:25:11 AM   |
| Syringe volume       | 0.5 mL                     |             |                        |
| Firmware version     | 1.2.1(r2)                  |             |                        |
| Titrant              | Acid (0.5 M HCl)           | 02-27-2018  | 2/27/2018 10:27:22 AM  |
| Dispenser 1          | Base                       |             | 3/31/2009 5:25:21 AM   |
| Syringe volume       | 0.5 mL                     |             |                        |
| Firmware version     | 1.2.1(r2)                  |             |                        |
| Titrant              | Base (0.5 M KOH)           | 9/22/2017   | 2/27/2018 10:21:22 AM  |
| Dispenser 5          | Cosolvent                  |             | 3/31/2009 5:26:24 AM   |
| Syringe volume       | 2.5 mL                     |             |                        |
| Firmware version     | 1.2.1(r2)                  |             |                        |
| Distribution valve 5 | Distribution Valve         |             | 3/31/2009 5:28:19 AM   |
| Firmware version     | 1.1.3                      |             |                        |
| Port A               | Methanol (80%, 0.15 M KCl) | 09-26-17    | 2/7/2018 9:42:01 AM    |
| Port B               | Cyclohexane                | 11-01-17    | 2/27/2018 10:37:57 AM  |
| Dispenser 3          | Buffer                     |             | 8/3/2010 5:05:16 AM    |
| Syringe volume       | 0.5 mL                     |             |                        |
| Firmware version     | 1.2.1(r2)                  |             |                        |
| Titrant              | Dodecane                   | 2018/01/31  | 2/28/2018 10:18:04 AM  |
| Dispenser 6          | Octanol                    |             | 10/22/2010 10:52:43 AM |



Sample name: **M11\_octanol**  
 Assay name: **pH-metric high logP**  
 Assay ID: **18C-01001**  
 Filename: **C:\Sirius\_T3\Mehtap\20180228\_exp28\_logP\_T3-2\18C-01001\_M11\_octanol\_pH-metric high logP.t3r**

Experiment start time: **3/1/2018 12:11:22 AM**  
 Analyst: **Pion**  
 Instrument ID: **T312060**

## Instrument Settings (continued)

| Setting                                   | Value                      | Batch Id    | Install date           |
|-------------------------------------------|----------------------------|-------------|------------------------|
| Syringe volume                            | 0.5 mL                     |             |                        |
| Firmware version                          | 1.2.1(r2)                  |             |                        |
| Titrant                                   | Octanol                    | 01-31-2018  | 2/27/2018 9:59:35 AM   |
| Titration                                 |                            | T3TM1200161 | 3/31/2009 5:24:17 AM   |
| Horizontal axis firmware version          | 1.17 AI1DI2DO2 Stepper 2   |             |                        |
| Vertical axis firmware version            | 1.17 AI1DI2DO2 Stepper 2   |             |                        |
| Chassis I/O firmware version              | 1.11 AI1DI0DO4 Norgren I/O |             |                        |
| Probe I/O firmware version                | 1.1.1                      |             |                        |
| Electrode                                 | T3 Electrode               | T3E0923     | 1/23/2018 2:01:00 PM   |
| E0 calibration                            | +3.86 mV                   |             | 3/1/2018 12:11:50 AM   |
| Filling solution                          | 3M KCl                     | KCL097      | 2/27/2018 9:49:43 AM   |
| Liquids                                   |                            |             |                        |
| Wash 1                                    | 50% IPA:50% Water          |             | 2/28/2018 10:23:32 AM  |
| Wash 2                                    | 0.5% Triton X-100 in H2O   |             | 2/28/2018 10:23:34 AM  |
| Buffer position 1                         | pH7 Wash                   |             | 2/28/2018 10:24:06 AM  |
| Buffer position 2                         | pH 7                       |             | 2/28/2018 10:24:08 AM  |
| Storage position                          |                            |             | 2/28/2018 10:21:14 AM  |
| Wash water                                | 8.5e+003 mL                | 02-27-2018  | 2/27/2018 9:54:39 AM   |
| Waste                                     | 6.9e+003 mL                |             | 11/28/2017 10:36:29 AM |
| Temperature controller                    |                            |             | 8/5/2010 6:35:13 AM    |
| Turbidity detector                        |                            |             | 3/31/2009 5:24:45 AM   |
| Spectrometer                              |                            | 074811      | 11/23/2010 11:22:28 AM |
| Dip probe                                 |                            | 10196       |                        |
| Wavelength coefficient A0                 | 183.333                    |             |                        |
| Wavelength coefficient A1                 | 2.21568                    |             |                        |
| Wavelength coefficient A2                 | -0.000289308               |             |                        |
| Total lamp lit time                       | 112:08:55                  |             | 11/23/2010 11:22:28 AM |
| Calibrated on                             | 2/27/2018 10:40:38 AM      |             |                        |
| Integration time                          | 40                         |             |                        |
| Scans averaged                            | 10                         |             |                        |
| Autoloader                                |                            | T3AL1200345 | 11/10/2015 9:34:13 AM  |
| Left-right axis firmware version          | 1.17 AI1DI2DO2 Stepper 2   |             |                        |
| Front-back axis firmware version          | 1.17 AI1DI2DO2 Stepper 2   |             |                        |
| Vertical axis firmware version            | 1.17 AI1DI2DO2 Stepper 2   |             |                        |
| Chassis I/O firmware version              | 1.11 AI1DI0DO4 Norgren I/O |             |                        |
| Configuration                             |                            |             |                        |
| Alternate titration position              | Titration position         |             |                        |
| Alternate reference position              | Reference position         |             |                        |
| Maximum standard vial volume              | 3.50 mL                    |             |                        |
| Maximum alternate vial volume             | 25.00 mL                   |             |                        |
| Automatic action idle period              | 5 minute(s)                |             |                        |
| Titration tube volume                     | 1.3 mL                     |             |                        |
| Syringe flush count                       | 3.50                       |             |                        |
| Flowing wash pump volume                  | 20.0 mL                    |             |                        |
| Flowing wash stir duration                | 5 s                        |             |                        |
| Flowing wash stir speed                   | 30%                        |             |                        |
| Solvent wash stir duration                | 5 s                        |             |                        |
| Solvent wash stir speed                   | 30%                        |             |                        |
| Surfactant wash stir duration             | 5 s                        |             |                        |
| Surfactant wash stir speed                | 30%                        |             |                        |
| E0 calibration minimum number of points   | 10                         |             |                        |
| E0 calibration maximum standard deviation | 0.01500                    |             |                        |
| E0 calibration timeout period             | 60 s                       |             |                        |
| E0 calibration stir duration              | 5 s                        |             |                        |
| E0 calibration preparation stir speed     | 30%                        |             |                        |
| E0 calibration buffer wash stir duration  | 5 s                        |             |                        |
| E0 calibration buffer wash stir speed     | 30%                        |             |                        |
| E0 calibration reading stir speed         | 0%                         |             |                        |

Sample name: **M11\_octanol** Experiment start time: **3/1/2018 12:11:22 AM**  
 Assay name: **pH-metric high logP** Analyst: **Pion**  
 Assay ID: **18C-01001** Instrument ID: **T312060**  
 Filename: **C:\Sirius\_T3\Mehtap\20180228\_exp28\_logP\_T3-2\18C-01001\_M11\_octanol\_pH-metric high logP.t3r**

## Instrument Settings (continued)

| Setting                                     | Value   | Batch Id | Install date |
|---------------------------------------------|---------|----------|--------------|
| Spectrometer calibration stir duration      | 5 s     |          |              |
| Spectrometer calibration stir speed         | 30%     |          |              |
| Spectrometer calibration wash pump volume   | 20.0 mL |          |              |
| Spectrometer calibration wash stir duration | 5 s     |          |              |
| Spectrometer calibration wash stir speed    | 30%     |          |              |
| Overhead dispense height                    | 10000   |          |              |

## Refinement Settings

| Setting                        | Value    | Default value |
|--------------------------------|----------|---------------|
| Turbidity detection method     | None     | None          |
| Turbidity wavelength to assess | 500.0 nm | 500.0 nm      |
| Turbidity maximum absorbance   | 0.100    | 0.100         |
| Turbidity probe threshold      | 50.00    | 50.00         |

## Experiment Log

[1:49] Air gap created for Water (0.15 M KCl)  
 [1:49] Air gap created for Acid (0.5 M HCl)  
 [1:50] Air gap created for Base (0.5 M KOH)  
 [1:50] Air gap released for Water (0.15 M KCl)  
 [1:54] Titrator arm moved over Titration position  
 [1:54] Titration 1 of 3  
 [1:54] Adding initial titrants  
 [1:54] Automatically add 1.50000 mL of water  
 [2:19] Dispensed 1.500000 mL of Water (0.15 M KCl)  
 [2:23] Titrator arm moved over Drain  
 [8:05] Titrator arm moved to Titration position  
 [8:05] Argon flow rate set to 100  
 [8:05] Stirrer speed set to 10  
 [8:10] Automatically add 0.02000 mL of Octanol  
 [8:10] Dispensed 0.019991 mL of Octanol  
 [8:11] Initial pH = 9.64  
 [8:11] Iterative adjust 9.64 -> 2.00  
 [8:11] pH 9.64 -> 2.00  
 [8:13] Air gap released for Acid (0.5 M HCl)  
 [8:14] Dispensed 0.054069 mL of Acid (0.5 M HCl)  
 [8:19] Holding pH 2.00  
 [10:19] Stirrer speed set to 0  
 [10:19] Stirrer speed set to 50  
 [10:19] Iterative adjust 1.97 -> 2.00  
 [10:19] pH 1.97 -> 2.00  
 [10:20] Air gap released for Base (0.5 M KOH)  
 [10:21] Dispensed 0.003010 mL of Base (0.5 M KOH)  
 [11:11] Stirrer speed set to 0  
 [11:21] Datapoint id 1 collected  
 [11:21] Stirrer speed set to 50  
 [11:26] pH 2.02 -> 2.22  
 [11:26] Using cautious pH adjust  
 [11:26] Dispensed 0.007643 mL of Base (0.5 M KOH)  
 [11:32] Stepping pH = 2.11  
 [11:32] Dispensed 0.005833 mL of Base (0.5 M KOH)  
 [11:37] Stepping pH = 2.20  
 [11:37] Dispensed 0.000964 mL of Base (0.5 M KOH)  
 [11:42] Stepping pH = 2.22  
 [11:57] Stirrer speed set to 0  
 [12:07] Datapoint id 2 collected  
 [12:07] Charge balance equation is out by 5.6%  
 [12:07] Stirrer speed set to 50

Sample name: **M11\_octanol**  
Assay name: **pH-metric high logP**  
Assay ID: **18C-01001**  
Filename: **C:\Sirius\_T3\Mehtap\20180228\_exp28\_logP\_T3-2\18C-01001\_M11\_octanol\_pH-metric high logP.t3r**

Experiment start time: **3/1/2018 12:11:22 AM**  
Analyst: **Pion**  
Instrument ID: **T312060**

## Experiment Log (continued)

[12:12] pH 2.23 -> 2.43  
[12:12] Using charge balance adjust  
[12:13] Dispensed 0.009572 mL of Base (0.5 M KOH)  
[12:33] Stirrer speed set to 0  
[12:43] Datapoint id 3 collected  
[12:43] Charge balance equation is out by 3.5%  
[12:43] Stirrer speed set to 50  
[12:48] pH 2.44 -> 2.64  
[12:48] Using charge balance adjust  
[12:48] Dispensed 0.006091 mL of Base (0.5 M KOH)  
[13:09] Stirrer speed set to 0  
[13:19] Datapoint id 4 collected  
[13:19] Charge balance equation is out by -5.3%  
[13:19] Stirrer speed set to 50  
[13:24] pH 2.64 -> 2.84  
[13:24] Using charge balance adjust  
[13:24] Dispensed 0.004210 mL of Base (0.5 M KOH)  
[13:45] Stirrer speed set to 0  
[13:55] Datapoint id 5 collected  
[13:55] Charge balance equation is out by 10.7%  
[13:55] Stirrer speed set to 50  
[14:00] pH 2.87 -> 3.07  
[14:00] Using charge balance adjust  
[14:00] Dispensed 0.003010 mL of Base (0.5 M KOH)  
[14:21] Stirrer speed set to 0  
[14:31] Datapoint id 6 collected  
[14:31] Charge balance equation is out by -4.5%  
[14:31] Stirrer speed set to 50  
[14:36] pH 3.06 -> 3.26  
[14:36] Using charge balance adjust  
[14:36] Dispensed 0.002469 mL of Base (0.5 M KOH)  
[14:56] Stirrer speed set to 0  
[15:06] Datapoint id 7 collected  
[15:06] Charge balance equation is out by 4.2%  
[15:06] Stirrer speed set to 50  
[15:11] pH 3.27 -> 3.47  
[15:11] Using charge balance adjust  
[15:11] Dispensed 0.002164 mL of Base (0.5 M KOH)  
[15:32] Stirrer speed set to 0  
[15:42] Datapoint id 8 collected  
[15:42] Charge balance equation is out by 0.1%  
[15:42] Stirrer speed set to 50  
[15:47] pH 3.48 -> 3.68  
[15:47] Using charge balance adjust  
[15:47] Dispensed 0.001952 mL of Base (0.5 M KOH)  
[16:07] Stirrer speed set to 0  
[16:18] Datapoint id 9 collected  
[16:18] Charge balance equation is out by -1.5%  
[16:18] Stirrer speed set to 50  
[16:23] pH 3.67 -> 3.87  
[16:23] Using charge balance adjust  
[16:23] Dispensed 0.001717 mL of Base (0.5 M KOH)  
[16:43] Stirrer speed set to 0  
[16:53] Datapoint id 10 collected  
[16:53] Charge balance equation is out by -16.9%  
[16:53] Stirrer speed set to 50  
[16:58] pH 3.84 -> 4.04  
[16:58] Using cautious pH adjust  
[16:58] Dispensed 0.000729 mL of Base (0.5 M KOH)

Sample name: **M11\_octanol**  
Assay name: **pH-metric high logP**  
Assay ID: **18C-01001**  
Filename: **C:\Sirius\_T3\Mehtap\20180228\_exp28\_logP\_T3-2\18C-01001\_M11\_octanol\_pH-metric high logP.t3r**

Experiment start time: **3/1/2018 12:11:22 AM**  
Analyst: **Pion**  
Instrument ID: **T312060**

## Experiment Log (continued)

[17:03] Stepping pH = 3.91  
[17:03] Dispensed 0.000823 mL of Base (0.5 M KOH)  
[17:08] Stepping pH = 4.01  
[17:09] Dispensed 0.000165 mL of Base (0.5 M KOH)  
[17:14] Stepping pH = 4.04  
[17:29] Stirrer speed set to 0  
[17:39] Datapoint id 11 collected  
[17:39] Charge balance equation is out by -17.2%  
[17:39] Stirrer speed set to 50  
[17:44] pH 4.03 -> 4.23  
[17:44] Using cautious pH adjust  
[17:44] Dispensed 0.000588 mL of Base (0.5 M KOH)  
[17:49] Stepping pH = 4.12  
[17:49] Dispensed 0.000447 mL of Base (0.5 M KOH)  
[17:54] Stepping pH = 4.22  
[17:54] Dispensed 0.000047 mL of Base (0.5 M KOH)  
[17:59] Stepping pH = 4.24  
[18:14] Stirrer speed set to 0  
[18:25] Datapoint id 12 collected  
[18:25] Charge balance equation is out by 7.9%  
[18:25] Stirrer speed set to 50  
[18:30] pH 4.24 -> 4.44  
[18:30] Using charge balance adjust  
[18:30] Dispensed 0.000870 mL of Base (0.5 M KOH)  
[18:50] Stirrer speed set to 0  
[19:01] Datapoint id 13 collected  
[19:01] Charge balance equation is out by 17.3%  
[19:01] Stirrer speed set to 50  
[19:06] pH 4.47 -> 4.67  
[19:06] Using cautious pH adjust  
[19:06] Dispensed 0.000282 mL of Base (0.5 M KOH)  
[19:11] Stepping pH = 4.56  
[19:11] Dispensed 0.000235 mL of Base (0.5 M KOH)  
[19:16] Stepping pH = 4.67  
[19:31] Stirrer speed set to 0  
[19:41] Datapoint id 14 collected  
[19:41] Charge balance equation is out by 9.3%  
[19:41] Stirrer speed set to 50  
[19:46] pH 4.69 -> 4.89  
[19:46] Using charge balance adjust  
[19:46] Dispensed 0.000376 mL of Base (0.5 M KOH)  
[20:06] Stirrer speed set to 0  
[20:17] Datapoint id 15 collected  
[20:17] Charge balance equation is out by 58.7%  
[20:17] Stirrer speed set to 50  
[20:23] pH 5.01 -> 5.21  
[20:23] Using cautious pH adjust  
[20:23] Dispensed 0.000094 mL of Base (0.5 M KOH)  
[20:28] Stepping pH = 5.02  
[20:28] Dispensed 0.000282 mL of Base (0.5 M KOH)  
[20:33] Stepping pH = 5.74  
[20:48] Stirrer speed set to 0  
[21:07] Datapoint id 16 collected  
[21:07] Charge balance equation is out by -91.3%  
[21:07] Stirrer speed set to 50  
[21:12] pH 5.85 -> 6.05  
[21:12] Using cautious pH adjust  
[21:12] Dispensed 0.000024 mL of Base (0.5 M KOH)  
[21:17] Stepping pH = 5.87

Sample name: **M11\_octanol**  
Assay name: **pH-metric high logP**  
Assay ID: **18C-01001**  
Filename: **C:\Sirius\_T3\Mehtap\20180228\_exp28\_logP\_T3-2\18C-01001\_M11\_octanol\_pH-metric high logP.t3r**

Experiment start time: **3/1/2018 12:11:22 AM**  
Analyst: **Pion**  
Instrument ID: **T312060**

## Experiment Log (continued)

[21:17] Dispensed 0.000094 mL of Base (0.5 M KOH)  
[21:22] Stepping pH = 6.25  
[21:38] Stirrer speed set to 0  
[22:20] Datapoint id 17 collected  
[22:20] Charge balance equation is out by -85.8%  
[22:20] Stirrer speed set to 50  
[22:25] pH 6.40 -> 6.60  
[22:25] Using cautious pH adjust  
[22:25] Dispensed 0.000024 mL of Base (0.5 M KOH)  
[22:30] Stepping pH = 6.43  
[22:30] Dispensed 0.000047 mL of Base (0.5 M KOH)  
[22:36] Stepping pH = 6.55  
[22:36] Dispensed 0.000024 mL of Base (0.5 M KOH)  
[22:41] Stepping pH = 6.90  
[22:56] Stirrer speed set to 0  
[23:56] Datapoint id 18 collected  
[23:56] Charge balance equation is out by -113.3%  
[23:56] Stirrer speed set to 50  
[24:01] pH 7.16 -> 7.36  
[24:01] Using cautious pH adjust  
[24:01] Dispensed 0.000024 mL of Base (0.5 M KOH)  
[24:06] Stepping pH = 7.21  
[24:06] Dispensed 0.000024 mL of Base (0.5 M KOH)  
[24:11] Stepping pH = 7.34  
[24:11] Dispensed 0.000024 mL of Base (0.5 M KOH)  
[24:16] Stepping pH = 7.64  
[24:31] Stirrer speed set to 0  
[25:31] Datapoint id 19 collected  
[25:31] Charge balance equation is out by -330.3%  
[25:31] Stirrer speed set to 50  
[25:37] pH 7.74 -> 7.94  
[25:37] Using cautious pH adjust  
[25:37] Dispensed 0.000024 mL of Base (0.5 M KOH)  
[25:42] Stepping pH = 7.80  
[25:42] Dispensed 0.000024 mL of Base (0.5 M KOH)  
[25:47] Stepping pH = 8.00  
[26:02] Stirrer speed set to 0  
[27:02] Datapoint id 20 collected  
[27:02] Charge balance equation is out by -530.4%  
[27:02] Stirrer speed set to 50  
[27:07] pH 8.20 -> 8.40  
[27:07] Using cautious pH adjust  
[27:07] Dispensed 0.000024 mL of Base (0.5 M KOH)  
[27:12] Stepping pH = 8.24  
[27:12] Dispensed 0.000024 mL of Base (0.5 M KOH)  
[27:17] Stepping pH = 8.38  
[27:17] Dispensed 0.000024 mL of Base (0.5 M KOH)  
[27:22] Stepping pH = 8.62  
[27:38] Stirrer speed set to 0  
[28:17] Datapoint id 21 collected  
[28:17] Charge balance equation is out by -617.9%  
[28:17] Stirrer speed set to 50  
[28:22] pH 8.66 -> 8.86  
[28:22] Using cautious pH adjust  
[28:22] Dispensed 0.000024 mL of Base (0.5 M KOH)  
[28:27] Stepping pH = 8.68  
[28:27] Dispensed 0.000024 mL of Base (0.5 M KOH)  
[28:32] Stepping pH = 8.76  
[28:32] Dispensed 0.000024 mL of Base (0.5 M KOH)

Sample name: **M11\_octanol**  
Assay name: **pH-metric high logP**  
Assay ID: **18C-01001**  
Filename: **C:\Sirius\_T3\Mehtap\20180228\_exp28\_logP\_T3-2\18C-01001\_M11\_octanol\_pH-metric high logP.t3r**

Experiment start time: **3/1/2018 12:11:22 AM**  
Analyst: **Pion**  
Instrument ID: **T312060**

## Experiment Log (continued)

[28:37] Stepping pH = 8.92  
[28:52] Stirrer speed set to 0  
[29:22] Datapoint id 22 collected  
[29:22] Charge balance equation is out by -250.7%  
[29:22] Stirrer speed set to 50  
[29:27] pH 8.95 -> 9.05  
[29:27] Using cautious pH adjust  
[29:27] Dispensed 0.000024 mL of Base (0.5 M KOH)  
[29:32] Stepping pH = 8.95  
[29:32] Dispensed 0.000024 mL of Base (0.5 M KOH)  
[29:37] Stepping pH = 9.06  
[29:52] Stirrer speed set to 0  
[30:15] Datapoint id 23 collected  
[30:15] Charge balance equation is out by -155.3%  
[30:15] Titration 2 of 3  
[30:15] Adding initial titrants  
[30:15] Automatically add 0.05000 mL of Octanol  
[30:16] Dispensed 0.050000 mL of Octanol  
[30:16] Stirrer speed set to 10  
[30:17] Stirrer speed set to 55  
[30:17] Iterative adjust 9.09 -> 2.00  
[30:17] pH 9.09 -> 2.00  
[30:19] Dispensed 0.056421 mL of Acid (0.5 M HCl)  
[30:24] pH 2.03 -> 2.00  
[30:24] Dispensed 0.002869 mL of Acid (0.5 M HCl)  
[31:14] Stirrer speed set to 0  
[31:24] Datapoint id 24 collected  
[31:24] Stirrer speed set to 55  
[31:29] pH 1.97 -> 2.17  
[31:29] Using cautious pH adjust  
[31:30] Dispensed 0.009313 mL of Base (0.5 M KOH)  
[31:35] Stepping pH = 2.07  
[31:35] Dispensed 0.006303 mL of Base (0.5 M KOH)  
[31:40] Stepping pH = 2.14  
[31:40] Dispensed 0.002211 mL of Base (0.5 M KOH)  
[31:45] Stepping pH = 2.17  
[32:00] Stirrer speed set to 0  
[32:10] Datapoint id 25 collected  
[32:10] Charge balance equation is out by 4.3%  
[32:10] Stirrer speed set to 55  
[32:16] pH 2.18 -> 2.38  
[32:16] Using charge balance adjust  
[32:16] Dispensed 0.011736 mL of Base (0.5 M KOH)  
[32:36] Stirrer speed set to 0  
[32:46] Datapoint id 26 collected  
[32:46] Charge balance equation is out by 10.1%  
[32:46] Stirrer speed set to 55  
[32:51] pH 2.41 -> 2.61  
[32:51] Using charge balance adjust  
[32:52] Dispensed 0.007385 mL of Base (0.5 M KOH)  
[33:12] Stirrer speed set to 0  
[33:22] Datapoint id 27 collected  
[33:22] Charge balance equation is out by -6.9%  
[33:22] Stirrer speed set to 55  
[33:27] pH 2.60 -> 2.80  
[33:27] Using charge balance adjust  
[33:27] Dispensed 0.005268 mL of Base (0.5 M KOH)  
[33:47] Stirrer speed set to 0  
[33:57] Datapoint id 28 collected



Sample name: **M11\_octanol**  
Assay name: **pH-metric high logP**  
Assay ID: **18C-01001**  
Filename: **C:\Sirius\_T3\Mehtap\20180228\_exp28\_logP\_T3-2\18C-01001\_M11\_octanol\_pH-metric high logP.t3r**

Experiment start time: **3/1/2018 12:11:22 AM**  
Analyst: **Pion**  
Instrument ID: **T312060**

## Experiment Log (continued)

[33:57] Charge balance equation is out by -4.7%  
[33:57] Stirrer speed set to 55  
[34:02] pH 2.80 -> 3.00  
[34:02] Using charge balance adjust  
[34:03] Dispensed 0.003951 mL of Base (0.5 M KOH)  
[34:23] Stirrer speed set to 0  
[34:33] Datapoint id 29 collected  
[34:33] Charge balance equation is out by 5.7%  
[34:33] Stirrer speed set to 55  
[34:38] pH 3.01 -> 3.21  
[34:38] Using charge balance adjust  
[34:38] Dispensed 0.003057 mL of Base (0.5 M KOH)  
[34:58] Stirrer speed set to 0  
[35:08] Datapoint id 30 collected  
[35:08] Charge balance equation is out by 7.6%  
[35:08] Stirrer speed set to 55  
[35:13] pH 3.23 -> 3.43  
[35:13] Using charge balance adjust  
[35:14] Dispensed 0.002399 mL of Base (0.5 M KOH)  
[35:34] Stirrer speed set to 0  
[35:44] Datapoint id 31 collected  
[35:44] Charge balance equation is out by -7.7%  
[35:44] Stirrer speed set to 55  
[35:49] pH 3.42 -> 3.62  
[35:49] Using charge balance adjust  
[35:49] Dispensed 0.001929 mL of Base (0.5 M KOH)  
[36:09] Stirrer speed set to 0  
[36:19] Datapoint id 32 collected  
[36:19] Charge balance equation is out by 4.5%  
[36:19] Stirrer speed set to 55  
[36:24] pH 3.63 -> 3.83  
[36:24] Using charge balance adjust  
[36:25] Dispensed 0.001435 mL of Base (0.5 M KOH)  
[36:45] Stirrer speed set to 0  
[36:55] Datapoint id 33 collected  
[36:55] Charge balance equation is out by 14.8%  
[36:55] Stirrer speed set to 55  
[37:00] pH 3.87 -> 4.07  
[37:00] Using charge balance adjust  
[37:00] Dispensed 0.000988 mL of Base (0.5 M KOH)  
[37:20] Stirrer speed set to 0  
[37:30] Datapoint id 34 collected  
[37:30] Charge balance equation is out by 25.2%  
[37:30] Stirrer speed set to 55  
[37:35] pH 4.13 -> 4.33  
[37:35] Using cautious pH adjust  
[37:35] Dispensed 0.000306 mL of Base (0.5 M KOH)  
[37:40] Stepping pH = 4.21  
[37:41] Dispensed 0.000235 mL of Base (0.5 M KOH)  
[37:46] Stepping pH = 4.32  
[38:01] Stirrer speed set to 0  
[38:11] Datapoint id 35 collected  
[38:11] Charge balance equation is out by 9.9%  
[38:11] Stirrer speed set to 55  
[38:16] pH 4.33 -> 4.53  
[38:16] Using charge balance adjust  
[38:16] Dispensed 0.000400 mL of Base (0.5 M KOH)  
[38:36] Stirrer speed set to 0  
[38:46] Datapoint id 36 collected

Sample name: **M11\_octanol**  
Assay name: **pH-metric high logP**  
Assay ID: **18C-01001**  
Filename: **C:\Sirius\_T3\Mehtap\20180228\_exp28\_logP\_T3-2\18C-01001\_M11\_octanol\_pH-metric high logP.t3r**

Experiment start time: **3/1/2018 12:11:22 AM**  
Analyst: **Pion**  
Instrument ID: **T312060**

## Experiment Log (continued)

[38:46] Charge balance equation is out by 23.7%  
[38:46] Stirrer speed set to 55  
[38:51] pH 4.58 -> 4.78  
[38:51] Using cautious pH adjust  
[38:51] Dispensed 0.000118 mL of Base (0.5 M KOH)  
[38:56] Stepping pH = 4.62  
[38:56] Dispensed 0.000212 mL of Base (0.5 M KOH)  
[39:02] Stepping pH = 4.90  
[39:17] Stirrer speed set to 0  
[39:30] Datapoint id 37 collected  
[39:30] Charge balance equation is out by -32.8%  
[39:30] Stirrer speed set to 55  
[39:35] pH 4.93 -> 5.13  
[39:35] Using cautious pH adjust  
[39:35] Dispensed 0.000071 mL of Base (0.5 M KOH)  
[39:40] Stepping pH = 4.94  
[39:40] Dispensed 0.000165 mL of Base (0.5 M KOH)  
[39:45] Stepping pH = 5.45  
[40:00] Stirrer speed set to 0  
[40:16] Datapoint id 38 collected  
[40:16] Charge balance equation is out by -85.1%  
[40:16] Stirrer speed set to 55  
[40:21] pH 5.53 -> 5.73  
[40:21] Using cautious pH adjust  
[40:21] Dispensed 0.000024 mL of Base (0.5 M KOH)  
[40:26] Stepping pH = 5.56  
[40:27] Dispensed 0.000047 mL of Base (0.5 M KOH)  
[40:32] Stepping pH = 5.61  
[40:32] Dispensed 0.000071 mL of Base (0.5 M KOH)  
[40:37] Stepping pH = 6.14  
[40:52] Stirrer speed set to 0  
[41:28] Datapoint id 39 collected  
[41:28] Charge balance equation is out by -212.4%  
[41:28] Stirrer speed set to 55  
[41:34] pH 6.23 -> 6.43  
[41:34] Using cautious pH adjust  
[41:34] Dispensed 0.000024 mL of Base (0.5 M KOH)  
[41:39] Stepping pH = 6.29  
[41:39] Dispensed 0.000024 mL of Base (0.5 M KOH)  
[41:44] Stepping pH = 6.37  
[41:44] Dispensed 0.000024 mL of Base (0.5 M KOH)  
[41:49] Stepping pH = 6.60  
[42:04] Stirrer speed set to 0  
[43:04] Datapoint id 40 collected  
[43:04] Charge balance equation is out by -59.8%  
[43:04] Stirrer speed set to 55  
[43:09] pH 6.71 -> 6.91  
[43:09] Using cautious pH adjust  
[43:09] Dispensed 0.000024 mL of Base (0.5 M KOH)  
[43:14] Stepping pH = 6.85  
[43:14] Dispensed 0.000024 mL of Base (0.5 M KOH)  
[43:19] Stepping pH = 7.05  
[43:35] Stirrer speed set to 0  
[44:35] Datapoint id 41 collected  
[44:35] Charge balance equation is out by -35.1%  
[44:35] Stirrer speed set to 55  
[44:40] pH 6.87 -> 7.07  
[44:40] Using cautious pH adjust  
[44:40] Dispensed 0.000024 mL of Base (0.5 M KOH)



Sample name: **M11\_octanol**  
Assay name: **pH-metric high logP**  
Assay ID: **18C-01001**  
Filename: **C:\Sirius\_T3\Mehtap\20180228\_exp28\_logP\_T3-2\18C-01001\_M11\_octanol\_pH-metric high logP.t3r**

Experiment start time: **3/1/2018 12:11:22 AM**  
Analyst: **Pion**  
Instrument ID: **T312060**

## Experiment Log (continued)

[44:45] Stepping pH = 6.82  
[44:45] Dispensed 0.000071 mL of Base (0.5 M KOH)  
[44:50] Stepping pH = 7.44  
[45:05] Stirrer speed set to 0  
[46:05] Datapoint id 42 collected  
[46:05] Charge balance equation is out by -316.2%  
[46:05] Stirrer speed set to 55  
[46:10] pH 7.84 -> 8.04  
[46:10] Using cautious pH adjust  
[46:10] Dispensed 0.000024 mL of Base (0.5 M KOH)  
[46:15] Stepping pH = 7.89  
[46:15] Dispensed 0.000024 mL of Base (0.5 M KOH)  
[46:20] Stepping pH = 8.09  
[46:36] Stirrer speed set to 0  
[47:36] Datapoint id 43 collected  
[47:36] Charge balance equation is out by -492.9%  
[47:36] Stirrer speed set to 55  
[47:41] pH 8.08 -> 8.28  
[47:41] Using cautious pH adjust  
[47:41] Dispensed 0.000024 mL of Base (0.5 M KOH)  
[47:46] Stepping pH = 8.16  
[47:46] Dispensed 0.000024 mL of Base (0.5 M KOH)  
[47:51] Stepping pH = 8.30  
[48:06] Stirrer speed set to 0  
[49:01] Datapoint id 44 collected  
[49:01] Charge balance equation is out by -412.6%  
[49:01] Stirrer speed set to 55  
[49:06] pH 8.32 -> 8.52  
[49:06] Using cautious pH adjust  
[49:06] Dispensed 0.000024 mL of Base (0.5 M KOH)  
[49:11] Stepping pH = 8.36  
[49:11] Dispensed 0.000024 mL of Base (0.5 M KOH)  
[49:17] Stepping pH = 8.42  
[49:17] Dispensed 0.000024 mL of Base (0.5 M KOH)  
[49:22] Stepping pH = 8.50  
[49:22] Dispensed 0.000024 mL of Base (0.5 M KOH)  
[49:27] Stepping pH = 8.61  
[49:42] Stirrer speed set to 0  
[50:13] Datapoint id 45 collected  
[50:13] Charge balance equation is out by -623.6%  
[50:13] Stirrer speed set to 55  
[50:18] pH 8.59 -> 8.79  
[50:18] Using cautious pH adjust  
[50:18] Dispensed 0.000024 mL of Base (0.5 M KOH)  
[50:23] Stepping pH = 8.61  
[50:23] Dispensed 0.000024 mL of Base (0.5 M KOH)  
[50:28] Stepping pH = 8.66  
[50:28] Dispensed 0.000047 mL of Base (0.5 M KOH)  
[50:34] Stepping pH = 8.69  
[50:34] Dispensed 0.000047 mL of Base (0.5 M KOH)  
[50:39] Stepping pH = 8.79  
[50:54] Stirrer speed set to 0  
[51:19] Datapoint id 46 collected  
[51:19] Charge balance equation is out by -667.4%  
[51:19] Stirrer speed set to 55  
[51:24] pH 8.78 -> 8.98  
[51:24] Using cautious pH adjust  
[51:24] Dispensed 0.000024 mL of Base (0.5 M KOH)  
[51:29] Stepping pH = 8.79

Sample name: **M11\_octanol**  
Assay name: **pH-metric high logP**  
Assay ID: **18C-01001**  
Filename: **C:\Sirius\_T3\Mehtap\20180228\_exp28\_logP\_T3-2\18C-01001\_M11\_octanol\_pH-metric high logP.t3r**

Experiment start time: **3/1/2018 12:11:22 AM**  
Analyst: **Pion**  
Instrument ID: **T312060**

## Experiment Log (continued)

[51:29] Dispensed 0.000047 mL of Base (0.5 M KOH)  
[51:34] Stepping pH = 8.93  
[51:34] Dispensed 0.000024 mL of Base (0.5 M KOH)  
[51:39] Stepping pH = 9.00  
[51:54] Stirrer speed set to 0  
[52:14] Datapoint id 47 collected  
[52:14] Charge balance equation is out by -185.9%  
[52:14] Stirrer speed set to 55  
[52:19] pH 8.99 -> 9.05  
[52:19] Using cautious pH adjust  
[52:19] Dispensed 0.000024 mL of Base (0.5 M KOH)  
[52:24] Stepping pH = 9.00  
[52:39] Stirrer speed set to 0  
[52:55] Datapoint id 48 collected  
[52:55] Charge balance equation is out by -80.3%  
[52:55] Titration 3 of 3  
[52:55] Adding initial titrants  
[52:55] Automatically add 0.15000 mL of Octanol  
[52:59] Dispensed 0.150000 mL of Octanol  
[52:59] Stirrer speed set to 10  
[53:00] Stirrer speed set to 60  
[53:00] Iterative adjust 9.00 -> 2.00  
[53:00] pH 9.00 -> 2.00  
[53:02] Dispensed 0.058678 mL of Acid (0.5 M HCl)  
[53:07] pH 2.06 -> 2.00  
[53:07] Dispensed 0.006515 mL of Acid (0.5 M HCl)  
[53:57] Stirrer speed set to 0  
[54:07] Datapoint id 49 collected  
[54:07] Stirrer speed set to 60  
[54:12] pH 1.96 -> 2.16  
[54:12] Using cautious pH adjust  
[54:13] Dispensed 0.010466 mL of Base (0.5 M KOH)  
[54:18] Stepping pH = 2.05  
[54:18] Dispensed 0.007667 mL of Base (0.5 M KOH)  
[54:23] Stepping pH = 2.13  
[54:23] Dispensed 0.001858 mL of Base (0.5 M KOH)  
[54:28] Stepping pH = 2.16  
[54:44] Stirrer speed set to 0  
[54:54] Datapoint id 50 collected  
[54:54] Charge balance equation is out by 4.5%  
[54:54] Stirrer speed set to 60  
[54:59] pH 2.16 -> 2.36  
[54:59] Using charge balance adjust  
[54:59] Dispensed 0.013523 mL of Base (0.5 M KOH)  
[55:19] Stirrer speed set to 0  
[55:29] Datapoint id 51 collected  
[55:29] Charge balance equation is out by 5.4%  
[55:29] Stirrer speed set to 60  
[55:35] pH 2.38 -> 2.58  
[55:35] Using charge balance adjust  
[55:35] Dispensed 0.008843 mL of Base (0.5 M KOH)  
[55:55] Stirrer speed set to 0  
[56:05] Datapoint id 52 collected  
[56:05] Charge balance equation is out by -2.8%  
[56:05] Stirrer speed set to 60  
[56:10] pH 2.58 -> 2.78  
[56:10] Using charge balance adjust  
[56:10] Dispensed 0.006185 mL of Base (0.5 M KOH)  
[56:31] Stirrer speed set to 0

Sample name: **M11\_octanol**  
Assay name: **pH-metric high logP**  
Assay ID: **18C-01001**  
Filename: **C:\Sirius\_T3\Mehtap\20180228\_exp28\_logP\_T3-2\18C-01001\_M11\_octanol\_pH-metric high logP.t3r**

Experiment start time: **3/1/2018 12:11:22 AM**  
Analyst: **Pion**  
Instrument ID: **T312060**

## Experiment Log (continued)

[56:41] Datapoint id 53 collected  
[56:41] Charge balance equation is out by 2.9%  
[56:41] Stirrer speed set to 60  
[56:46] pH 2.79 -> 2.99  
[56:46] Using charge balance adjust  
[56:46] Dispensed 0.004374 mL of Base (0.5 M KOH)  
[57:06] Stirrer speed set to 0  
[57:16] Datapoint id 54 collected  
[57:16] Charge balance equation is out by 5.5%  
[57:16] Stirrer speed set to 60  
[57:21] pH 3.01 -> 3.21  
[57:21] Using charge balance adjust  
[57:21] Dispensed 0.003081 mL of Base (0.5 M KOH)  
[57:42] Stirrer speed set to 0  
[57:52] Datapoint id 55 collected  
[57:52] Charge balance equation is out by 17.6%  
[57:52] Stirrer speed set to 60  
[57:57] pH 3.25 -> 3.45  
[57:57] Using cautious pH adjust  
[57:57] Dispensed 0.001035 mL of Base (0.5 M KOH)  
[58:02] Stepping pH = 3.33  
[58:02] Dispensed 0.000823 mL of Base (0.5 M KOH)  
[58:07] Stepping pH = 3.42  
[58:07] Dispensed 0.000235 mL of Base (0.5 M KOH)  
[58:12] Stepping pH = 3.44  
[58:27] Stirrer speed set to 0  
[58:37] Datapoint id 56 collected  
[58:37] Charge balance equation is out by -2.1%  
[58:37] Stirrer speed set to 60  
[58:42] pH 3.44 -> 3.64  
[58:42] Using charge balance adjust  
[58:43] Dispensed 0.001435 mL of Base (0.5 M KOH)  
[59:03] Stirrer speed set to 0  
[59:13] Datapoint id 57 collected  
[59:13] Charge balance equation is out by 5.6%  
[59:13] Stirrer speed set to 60  
[59:18] pH 3.66 -> 3.86  
[59:18] Using charge balance adjust  
[59:18] Dispensed 0.000917 mL of Base (0.5 M KOH)  
[59:38] Stirrer speed set to 0  
[59:48] Datapoint id 58 collected  
[59:48] Charge balance equation is out by 2.8%  
[59:48] Stirrer speed set to 60  
[59:53] pH 3.88 -> 4.08  
[59:53] Using charge balance adjust  
[59:53] Dispensed 0.000588 mL of Base (0.5 M KOH)  
[1:00:14] Stirrer speed set to 0  
[1:00:24] Datapoint id 59 collected  
[1:00:24] Charge balance equation is out by 5.7%  
[1:00:24] Stirrer speed set to 60  
[1:00:29] pH 4.09 -> 4.29  
[1:00:29] Using charge balance adjust  
[1:00:29] Dispensed 0.000376 mL of Base (0.5 M KOH)  
[1:00:49] Stirrer speed set to 0  
[1:00:59] Datapoint id 60 collected  
[1:00:59] Charge balance equation is out by 11.7%  
[1:00:59] Stirrer speed set to 60  
[1:01:04] pH 4.33 -> 4.53  
[1:01:04] Using charge balance adjust

Sample name: **M11\_octanol**  
Assay name: **pH-metric high logP**  
Assay ID: **18C-01001**  
Filename: **C:\Sirius\_T3\Mehtap\20180228\_exp28\_logP\_T3-2\18C-01001\_M11\_octanol\_pH-metric high logP.t3r**

Experiment start time: **3/1/2018 12:11:22 AM**  
Analyst: **Pion**  
Instrument ID: **T312060**

## Experiment Log (continued)

[1:01:04] Dispensed 0.000212 mL of Base (0.5 M KOH)  
[1:01:24] Stirrer speed set to 0  
[1:01:35] Datapoint id 61 collected  
[1:01:35] Charge balance equation is out by -11.9%  
[1:01:35] Stirrer speed set to 60  
[1:01:40] pH 4.52 -> 4.72  
[1:01:40] Using charge balance adjust  
[1:01:40] Dispensed 0.000141 mL of Base (0.5 M KOH)  
[1:02:00] Stirrer speed set to 0  
[1:02:12] Datapoint id 62 collected  
[1:02:12] Charge balance equation is out by -7.5%  
[1:02:12] Stirrer speed set to 60  
[1:02:17] pH 4.73 -> 4.93  
[1:02:17] Using charge balance adjust  
[1:02:17] Dispensed 0.000094 mL of Base (0.5 M KOH)  
[1:02:37] Stirrer speed set to 0  
[1:02:50] Datapoint id 63 collected  
[1:02:50] Charge balance equation is out by -28.9%  
[1:02:50] Stirrer speed set to 60  
[1:02:55] pH 4.92 -> 5.12  
[1:02:55] Using cautious pH adjust  
[1:02:55] Dispensed 0.000024 mL of Base (0.5 M KOH)  
[1:03:00] Stepping pH = 4.94  
[1:03:00] Dispensed 0.000094 mL of Base (0.5 M KOH)  
[1:03:05] Stepping pH = 5.24  
[1:03:20] Stirrer speed set to 0  
[1:03:34] Datapoint id 64 collected  
[1:03:34] Charge balance equation is out by -82.8%  
[1:03:34] Stirrer speed set to 60  
[1:03:39] pH 5.35 -> 5.55  
[1:03:39] Using cautious pH adjust  
[1:03:39] Dispensed 0.000024 mL of Base (0.5 M KOH)  
[1:03:44] Stepping pH = 5.38  
[1:03:45] Dispensed 0.000047 mL of Base (0.5 M KOH)  
[1:03:50] Stepping pH = 5.57  
[1:04:05] Stirrer speed set to 0  
[1:04:25] Datapoint id 65 collected  
[1:04:25] Charge balance equation is out by -49.2%  
[1:04:25] Stirrer speed set to 60  
[1:04:30] pH 5.71 -> 5.91  
[1:04:30] Using cautious pH adjust  
[1:04:30] Dispensed 0.000024 mL of Base (0.5 M KOH)  
[1:04:35] Stepping pH = 5.75  
[1:04:36] Dispensed 0.000047 mL of Base (0.5 M KOH)  
[1:04:41] Stepping pH = 6.27  
[1:04:56] Stirrer speed set to 0  
[1:05:51] Datapoint id 66 collected  
[1:05:51] Charge balance equation is out by -57.7%  
[1:05:51] Stirrer speed set to 60  
[1:05:56] pH 6.32 -> 6.52  
[1:05:56] Using cautious pH adjust  
[1:05:56] Dispensed 0.000024 mL of Base (0.5 M KOH)  
[1:06:01] Stepping pH = 6.20  
[1:06:02] Dispensed 0.000188 mL of Base (0.5 M KOH)  
[1:06:07] Stepping pH = 8.64  
[1:06:22] Stirrer speed set to 0  
[1:06:59] Datapoint id 67 collected  
[1:06:59] Charge balance equation is out by -355.4%  
[1:06:59] Stirrer speed set to 60

Sample name: **M11\_octanol**  
Assay name: **pH-metric high logP**  
Assay ID: **18C-01001**  
Filename: **C:\Sirius\_T3\Mehtap\20180228\_exp28\_logP\_T3-2\18C-01001\_M11\_octanol\_pH-metric high logP.t3r**

Experiment start time: **3/1/2018 12:11:22 AM**  
Analyst: **Pion**  
Instrument ID: **T312060**

## Experiment Log (continued)

[1:07:04] pH 8.65 -> 8.85  
[1:07:04] Using cautious pH adjust  
[1:07:04] Dispensed 0.000024 mL of Base (0.5 M KOH)  
[1:07:09] Stepping pH = 8.61  
[1:07:09] Dispensed 0.000071 mL of Base (0.5 M KOH)  
[1:07:14] Stepping pH = 8.77  
[1:07:14] Dispensed 0.000024 mL of Base (0.5 M KOH)  
[1:07:19] Stepping pH = 8.81  
[1:07:19] Dispensed 0.000024 mL of Base (0.5 M KOH)  
[1:07:24] Stepping pH = 8.85  
[1:07:40] Stirrer speed set to 0  
[1:08:04] Datapoint id 68 collected  
[1:08:04] Charge balance equation is out by -499.1%  
[1:08:04] Stirrer speed set to 60  
[1:08:09] pH 8.85 -> 9.05  
[1:08:09] Using cautious pH adjust  
[1:08:09] Dispensed 0.000024 mL of Base (0.5 M KOH)  
[1:08:14] Stepping pH = 8.87  
[1:08:14] Dispensed 0.000047 mL of Base (0.5 M KOH)  
[1:08:19] Stepping pH = 8.98  
[1:08:19] Dispensed 0.000024 mL of Base (0.5 M KOH)  
[1:08:24] Stepping pH = 9.02  
[1:08:39] Stirrer speed set to 0  
[1:08:55] Datapoint id 69 collected  
[1:08:55] Charge balance equation is out by -147.2%  
[1:08:55] Argon flow rate set to 0  
[1:08:59] Titrator arm moved over Titration position
