# Supplementary material for: Octanol-water partition coefficient measurements for the SAMPL6 Blind Prediction Challenge
Source: bioRxiv or medRxiv preprint supplement (doi:10.1101/757393), 2019-12-02
Supplement: Supplementary file [file media-2.zip]

Sample name: **M16\_octanol**  
 Assay name: **pH-metric high logP**  
 Assay ID: **18C-01009**  
 Filename: **C:\Sirius\_T3\Mehtap\20180228\_exp28\_logP\_T3-2\18C-01009\_M16\_octanol\_pH-metric high logP.t3r**

Experiment start time: **3/1/2018 12:08:09 PM**  
 Analyst: **Pion**  
 Instrument ID: **T312060**

## pH-metric Result

logP (XH2 +) -0.17 ±0.20 (n=50)  
 logP (neutral XH) 3.04 ±0.01 (n=50)  
 logP (X -) -1.62

### 18C-01009 Points 1 to 31

M16\_octanol concentration factor 0.767  
 Carbonate 0.0840 mM  
 Acidity error 3.05344 mM

### 18C-01009 Points 32 to 62

M16\_octanol concentration factor 0.794  
 Carbonate 0.1938 mM  
 Acidity error 2.68082 mM

### 18C-01009 Points 63 to 92

M16\_octanol concentration factor 0.836  
 Carbonate 0.2810 mM  
 Acidity error 2.47693 mM

## Warnings and errors

Errors None  
 Warnings None

## Sample logD and percent species

| pH     | M16_octanol<br>logD | M16_octanol<br>M16_octanolH2 | M16_octanol<br>M16_octanolH | M16_octanol<br>M16_octanol | M16_octanol<br>M16_octanolH2* | M16_octanol<br>M16_octanolH* | M16_octanol<br>M16_octanol* | Comment       |
|--------|---------------------|------------------------------|-----------------------------|----------------------------|-------------------------------|------------------------------|-----------------------------|---------------|
| 1.000  | -0.05               | 52.62 %                      | 0.01 %                      | 0.00 %                     | 35.72 %                       | 11.64 %                      | 0.00 %                      | Stomach<br>pH |
| 1.200  | 0.01                | 49.26 %                      | 0.02 %                      | 0.00 %                     | 33.44 %                       | 17.28 %                      | 0.00 %                      |               |
| 2.000  | 0.46                | 25.68 %                      | 0.05 %                      | 0.00 %                     | 17.44 %                       | 56.83 %                      | 0.00 %                      | Blood pH      |
| 3.000  | 1.35                | 4.20 %                       | 0.08 %                      | 0.00 %                     | 2.85 %                        | 92.87 %                      | 0.00 %                      |               |
| 4.000  | 2.27                | 0.45 %                       | 0.09 %                      | 0.00 %                     | 0.30 %                        | 99.16 %                      | 0.00 %                      |               |
| 5.000  | 2.87                | 0.05 %                       | 0.09 %                      | 0.00 %                     | 0.03 %                        | 99.83 %                      | 0.00 %                      |               |
| 6.000  | 3.02                | 0.00 %                       | 0.09 %                      | 0.00 %                     | 0.00 %                        | 99.90 %                      | 0.00 %                      |               |
| 6.500  | 3.04                | 0.00 %                       | 0.09 %                      | 0.00 %                     | 0.00 %                        | 99.91 %                      | 0.00 %                      |               |
| 7.000  | 3.04                | 0.00 %                       | 0.09 %                      | 0.00 %                     | 0.00 %                        | 99.91 %                      | 0.00 %                      |               |
| 7.400  | 3.03                | 0.00 %                       | 0.09 %                      | 0.00 %                     | 0.00 %                        | 99.91 %                      | 0.00 %                      |               |
| 8.000  | 3.00                | 0.00 %                       | 0.09 %                      | 0.01 %                     | 0.00 %                        | 99.90 %                      | 0.00 %                      |               |
| 9.000  | 2.71                | 0.00 %                       | 0.09 %                      | 0.10 %                     | 0.00 %                        | 99.80 %                      | 0.00 %                      |               |
| 10.000 | 1.95                | 0.00 %                       | 0.09 %                      | 1.02 %                     | 0.00 %                        | 98.86 %                      | 0.02 %                      |               |
| 11.000 | 0.98                | 0.00 %                       | 0.08 %                      | 9.35 %                     | 0.00 %                        | 90.34 %                      | 0.22 %                      |               |
| 12.000 | -0.00               | 0.00 %                       | 0.04 %                      | 50.23 %                    | 0.00 %                        | 48.52 %                      | 1.20 %                      |               |

Sample name: **M16\_octanol**  
 Assay name: **pH-metric high logP**  
 Assay ID: **18C-01009**  
 Filename: **C:\Sirius\_T3\Mehtap\20180228\_exp28\_logP\_T3-2\18C-01009\_M16\_octanol\_pH-metric high logP.t3r**

Experiment start time: **3/1/2018 12:08:09 PM**  
 Analyst: **Pion**  
 Instrument ID: **T312060**

## Graphs

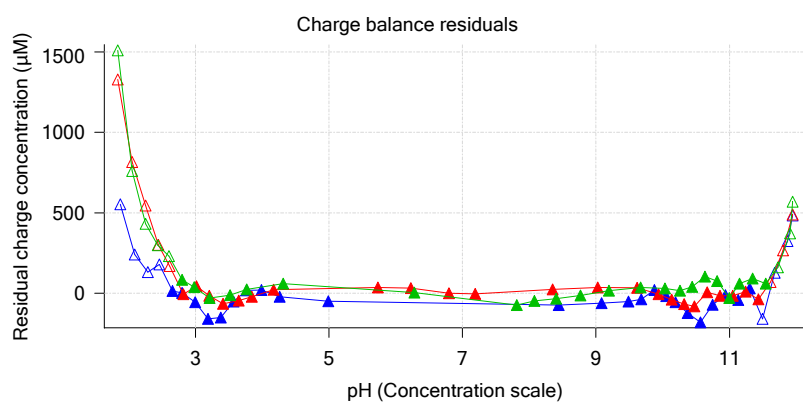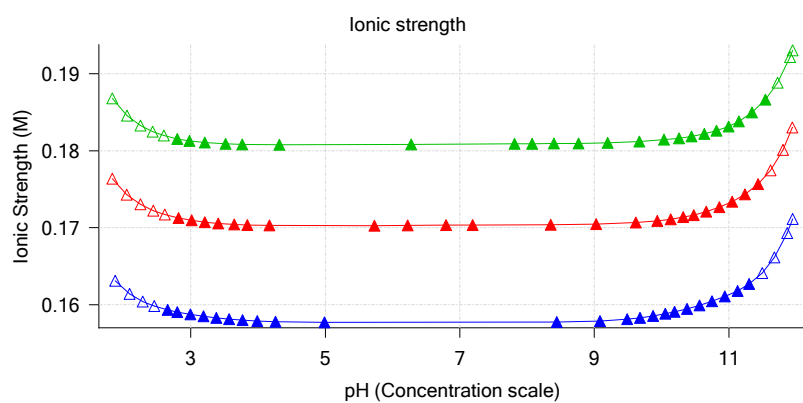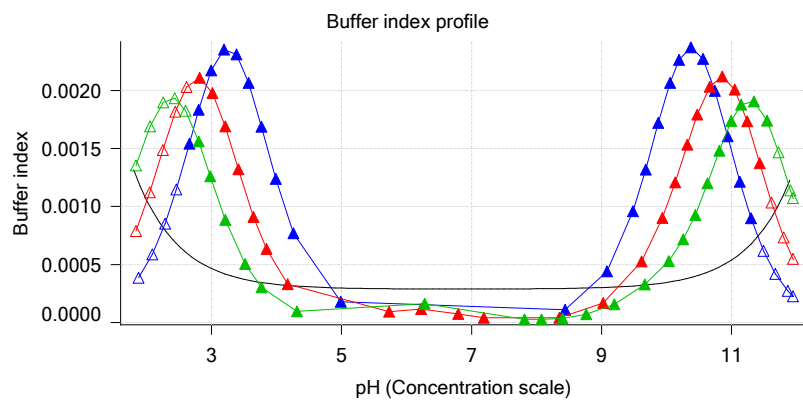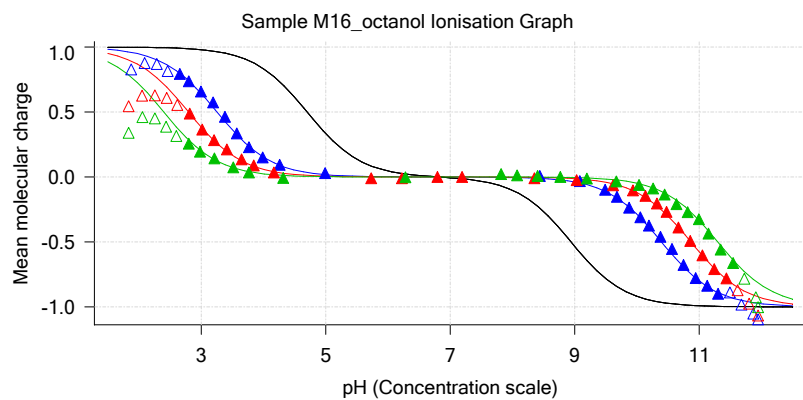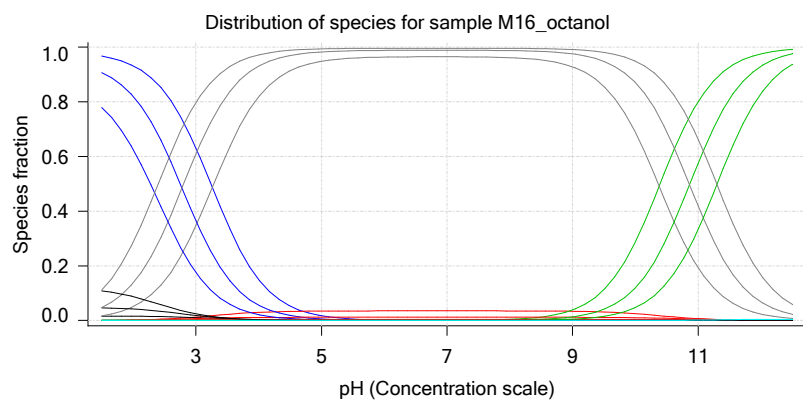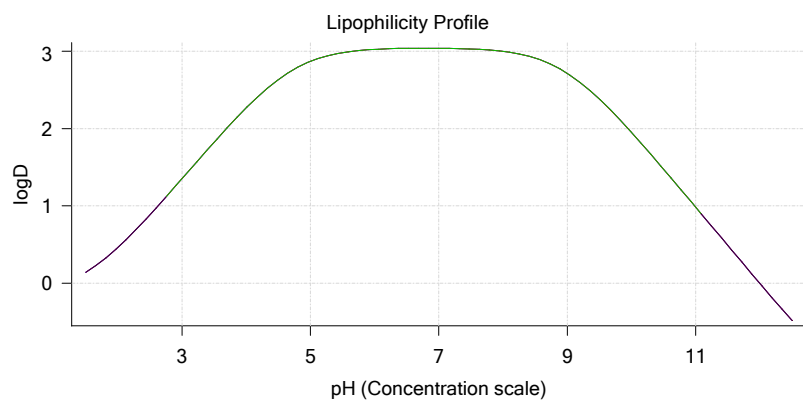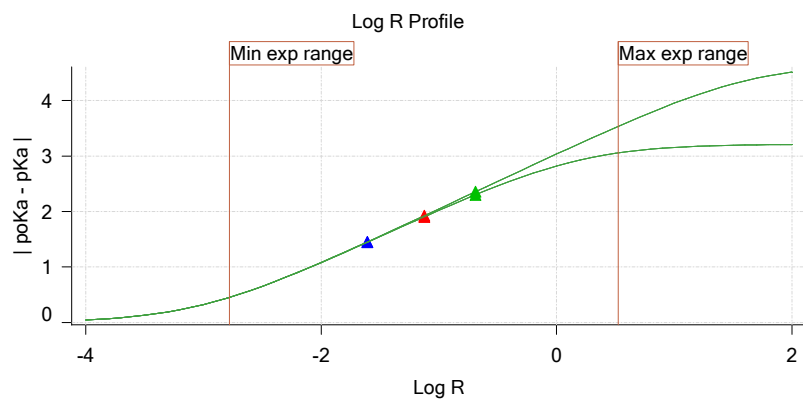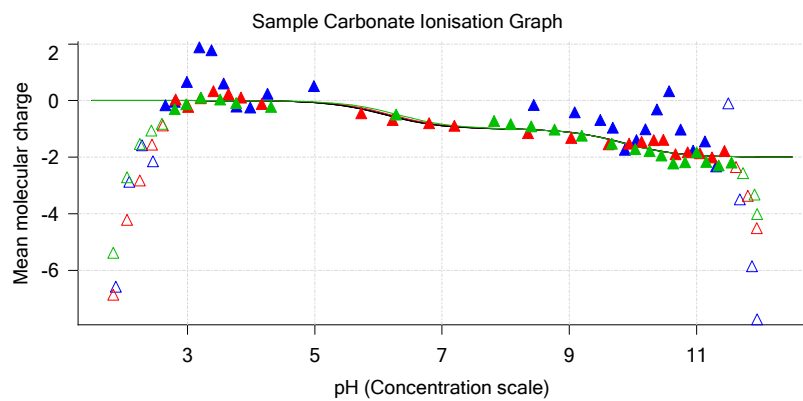

Sample name: **M16\_octanol**  
 Assay name: **pH-metric high logP**  
 Assay ID: **18C-01009**  
 Filename: **C:\Sirius\_T3\Mehtap\20180228\_exp28\_logP\_T3-2\18C-01009\_M16\_octanol\_pH-metric high logP.t3r**

Experiment start time: **3/1/2018 12:08:09 PM**  
 Analyst: **Pion**  
 Instrument ID: **T312060**

## Graphs (continued)

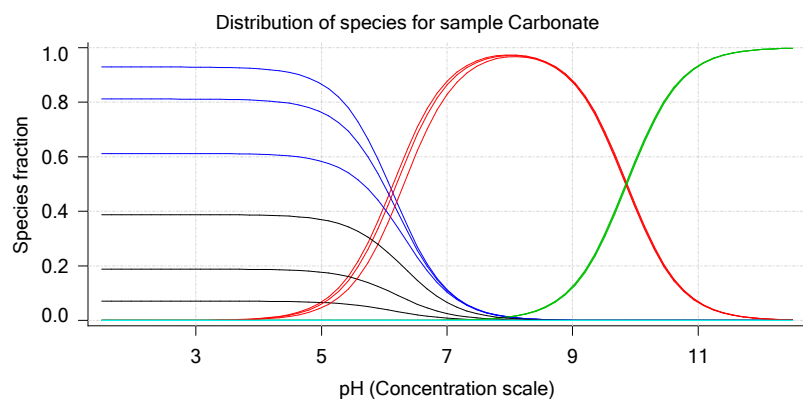

Sample name: **M16\_octanol**  
 Assay name: **pH-metric high logP**  
 Assay ID: **18C-01009**  
 Filename: **C:\Sirius\_T3\Mehtap\20180228\_exp28\_logP\_T3-2\18C-01009\_M16\_octanol\_pH-metric high logP.t3r**

Experiment start time: **3/1/2018 12:08:09 PM**  
 Analyst: **Pion**  
 Instrument ID: **T312060**

## pH-metric high logP Titration 1 of 3 18C-01009 Points 1 to 31

### Overall results

RMSD 0.138  
 Average ionic strength 0.159 M  
 Average temperature 25.0°C  
 Partition ratio 0.0247 : 1  
 Analyte concentration range 4991.2 µM to 5365.1 µM  
 Total points considered 23 of 31

### Warnings and errors

Errors None  
 Warnings Excessive acidity error present

### Four-Plus parameters

Alpha 0.130 3/1/2018 12:08:08 PM C:\Sirius\_T3\HCl18B27.t3r  
 S 0.9970 3/1/2018 12:08:08 PM C:\Sirius\_T3\HCl18B27.t3r  
 jH 0.8 3/1/2018 12:08:08 PM C:\Sirius\_T3\HCl18B27.t3r  
 jOH -0.4 3/1/2018 12:08:08 PM C:\Sirius\_T3\HCl18B27.t3r

### Titrants

0.50 M HCl 0.993513 3/1/2018 12:08:08 PM C:\Sirius\_T3\HCl18B27.t3r  
 0.50 M KOH 0.999845 3/1/2018 12:08:09 PM C:\Sirius\_T3\KOH18B27.t3r

### Sample

M16\_octanol concentration factor 0.767  
 Base pKa 1 4.70  
 Acid pKa 2 8.94  
 logP (XH<sub>2</sub><sup>+</sup>) 0.85  
 logP (neutral XH) 3.08  
 logP (X<sup>-</sup>) -1.62

### Sample graphs

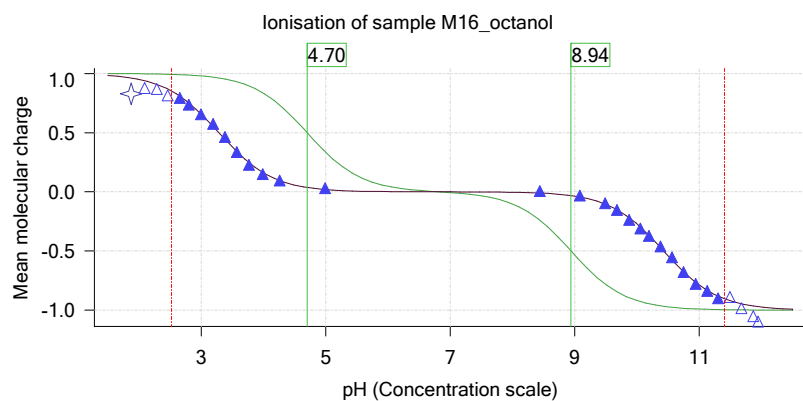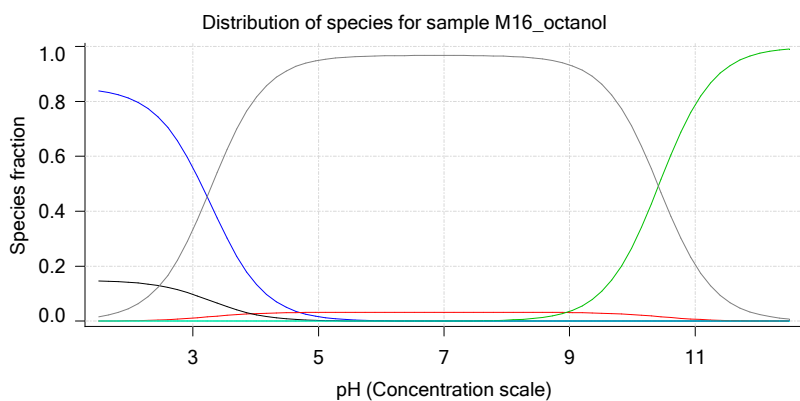

Sample name: **M16\_octanol**  
Assay name: **pH-metric high logP**  
Assay ID: **18C-01009**  
Filename: **C:\Sirius\_T3\Mehtap\20180228\_exp28\_logP\_T3-2\18C-01009\_M16\_octanol\_pH-metric high logP.t3r**

Experiment start time: **3/1/2018 12:08:09 PM**  
Analyst: **Pion**  
Instrument ID: **T312060**

## Sample graphs (continued)

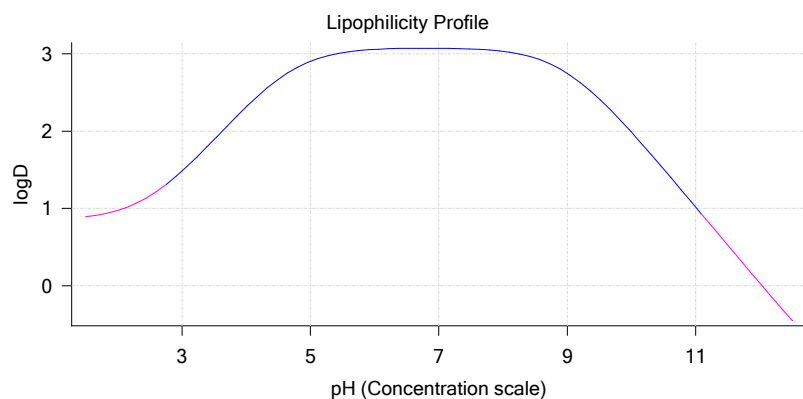

## Sample logD and percent species

| pH     | M16_octanol<br>logD | M16_octanol<br>M16_octanolH2 | M16_octanol<br>M16_octanolH | M16_octanol<br>M16_octanol | M16_octanol<br>M16_octanolH2* | M16_octanol<br>M16_octanolH* | M16_octanol<br>M16_octanol* | Comment       |
|--------|---------------------|------------------------------|-----------------------------|----------------------------|-------------------------------|------------------------------|-----------------------------|---------------|
| 1.000  | 0.86                | 84.71 %                      | 0.02 %                      | 0.00 %                     | 14.77 %                       | 0.50 %                       | 0.00 %                      | Stomach<br>pH |
| 1.200  | 0.87                | 84.45 %                      | 0.03 %                      | 0.00 %                     | 14.73 %                       | 0.79 %                       | 0.00 %                      |               |
| 2.000  | 0.97                | 80.93 %                      | 0.16 %                      | 0.00 %                     | 14.12 %                       | 4.80 %                       | 0.00 %                      |               |
| 3.000  | 1.48                | 55.95 %                      | 1.12 %                      | 0.00 %                     | 9.76 %                        | 33.17 %                      | 0.00 %                      |               |
| 4.000  | 2.31                | 13.69 %                      | 2.73 %                      | 0.00 %                     | 2.39 %                        | 81.18 %                      | 0.00 %                      | Blood pH      |
| 5.000  | 2.90                | 1.60 %                       | 3.19 %                      | 0.00 %                     | 0.28 %                        | 94.92 %                      | 0.00 %                      |               |
| 6.000  | 3.06                | 0.16 %                       | 3.25 %                      | 0.00 %                     | 0.03 %                        | 96.56 %                      | 0.00 %                      |               |
| 6.500  | 3.07                | 0.05 %                       | 3.25 %                      | 0.01 %                     | 0.01 %                        | 96.67 %                      | 0.00 %                      |               |
| 7.000  | 3.07                | 0.02 %                       | 3.25 %                      | 0.04 %                     | 0.00 %                        | 96.69 %                      | 0.00 %                      |               |
| 7.400  | 3.07                | 0.01 %                       | 3.25 %                      | 0.09 %                     | 0.00 %                        | 96.65 %                      | 0.00 %                      |               |
| 8.000  | 3.03                | 0.00 %                       | 3.24 %                      | 0.37 %                     | 0.00 %                        | 96.38 %                      | 0.00 %                      |               |
| 9.000  | 2.75                | 0.00 %                       | 3.14 %                      | 3.60 %                     | 0.00 %                        | 93.26 %                      | 0.00 %                      |               |
| 10.000 | 1.98                | 0.00 %                       | 2.37 %                      | 27.21 %                    | 0.00 %                        | 70.41 %                      | 0.02 %                      |               |
| 11.000 | 1.02                | 0.00 %                       | 0.69 %                      | 78.86 %                    | 0.00 %                        | 20.41 %                      | 0.05 %                      |               |
| 12.000 | 0.03                | 0.00 %                       | 0.08 %                      | 97.34 %                    | 0.00 %                        | 2.52 %                       | 0.06 %                      |               |

## Carbonate and acidity

Carbonate 0.084 mM  
Acidity error 3.053 mM

## Other graphs

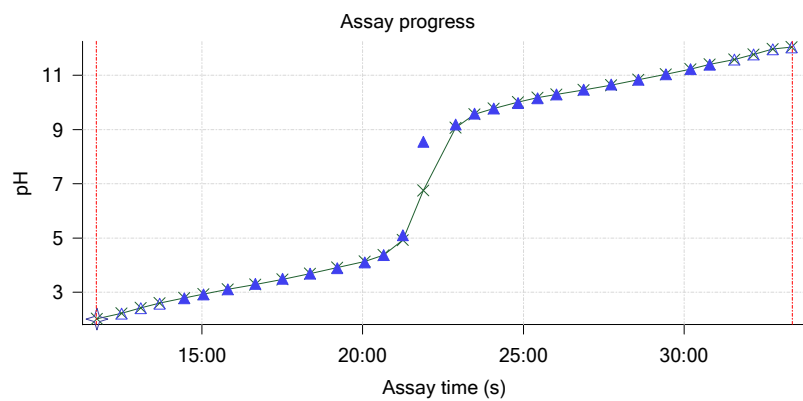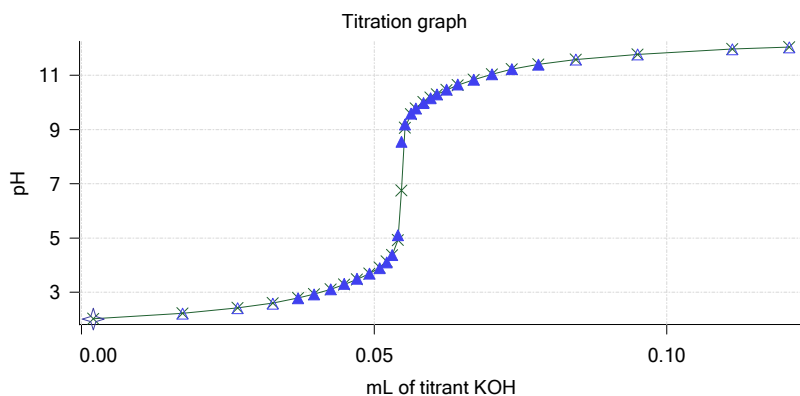

Sample name: **M16\_octanol**  
 Assay name: **pH-metric high logP**  
 Assay ID: **18C-01009**  
 Filename: **C:\Sirius\_T3\Mehtap\20180228\_exp28\_logP\_T3-2\18C-01009\_M16\_octanol\_pH-metric high logP.t3r**

Experiment start time: **3/1/2018 12:08:09 PM**  
 Analyst: **Pion**  
 Instrument ID: **T312060**

## Other graphs (continued)

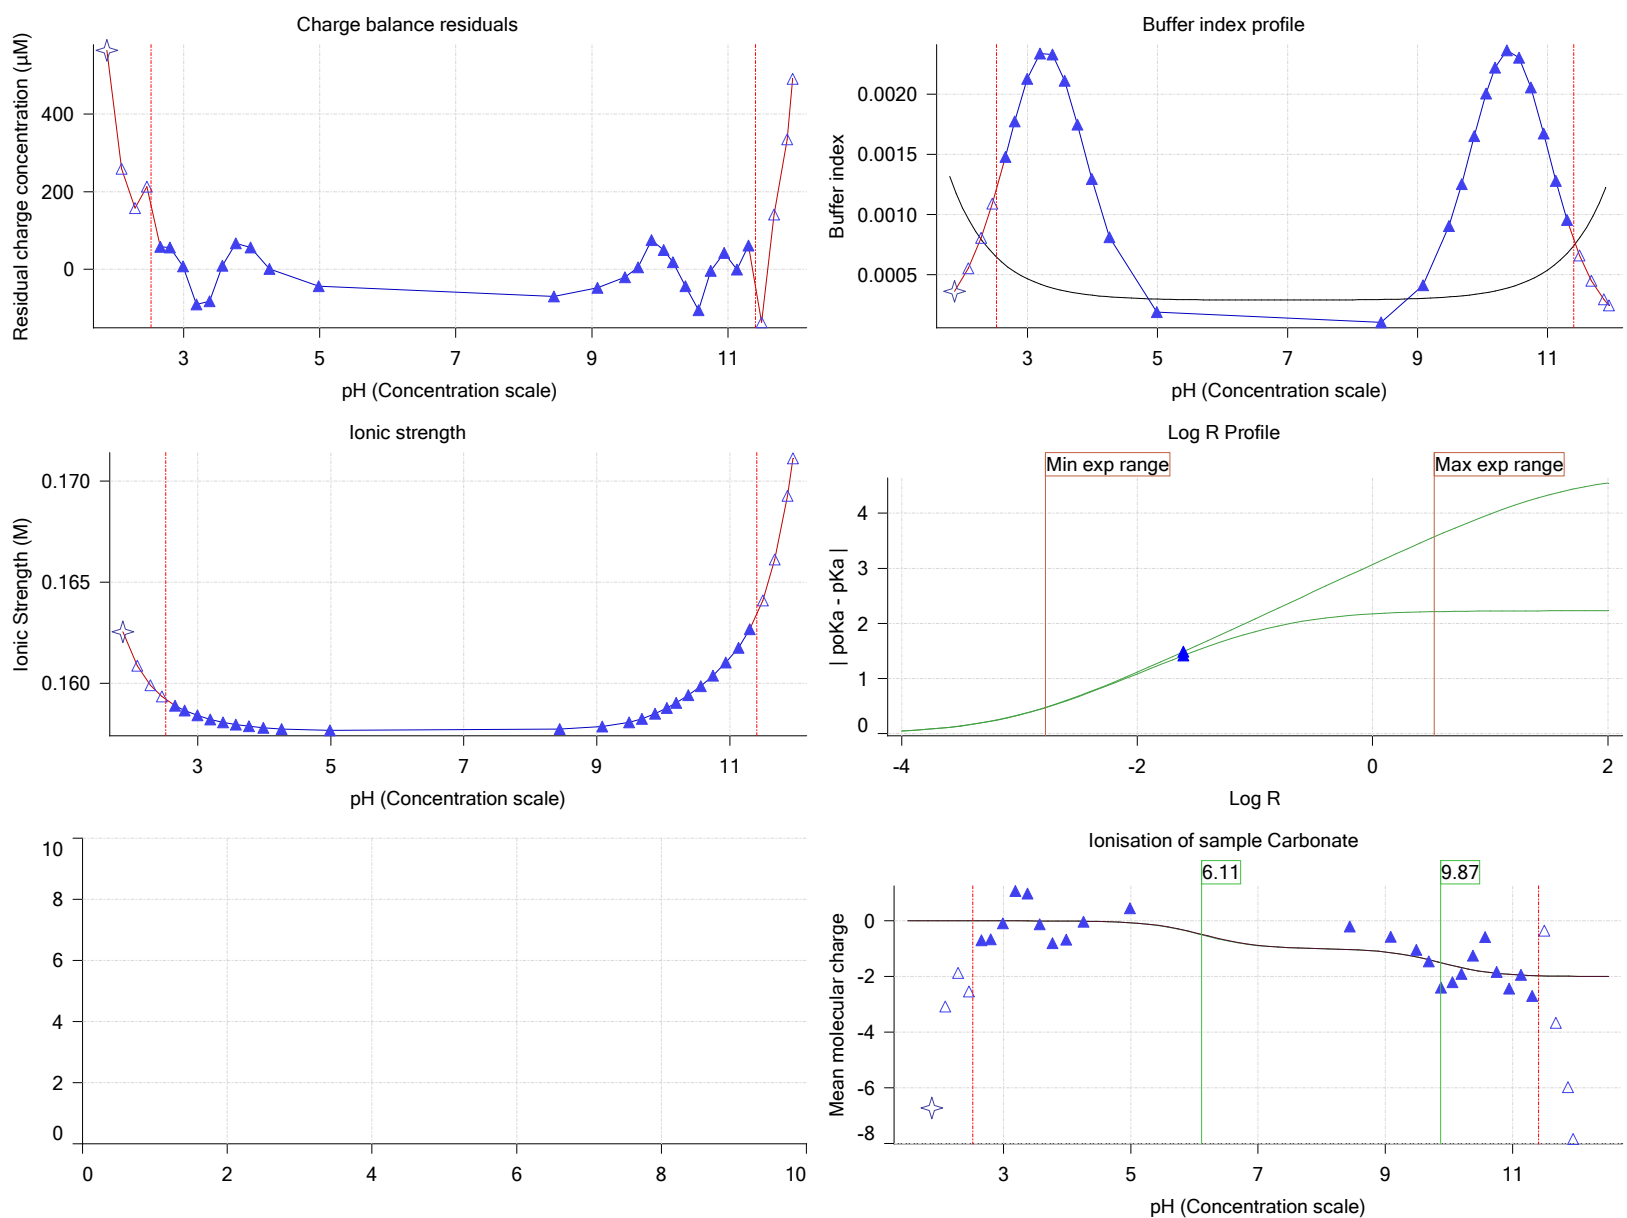

Sample name: **M16\_octanol**  
 Assay name: **pH-metric high logP**  
 Assay ID: **18C-01009**  
 Filename: **C:\Sirius\_T3\Mehtap\20180228\_exp28\_logP\_T3-2\18C-01009\_M16\_octanol\_pH-metric high logP.t3r**

Experiment start time: **3/1/2018 12:08:09 PM**  
 Analyst: **Pion**  
 Instrument ID: **T312060**

## pH-metric high logP Titration 2 of 3 18C-01009 Points 32 to 62

### Overall results

RMSD 0.147  
 Average ionic strength 0.171 M  
 Average temperature 25.0°C  
 Partition ratio 0.0751 : 1  
 Analyte concentration range 4115.3 µM to 4404.0 µM  
 Total points considered 23 of 31

### Warnings and errors

Errors None  
 Warnings Excessive acidity error present

### Four-Plus parameters

Alpha 0.130 3/1/2018 12:08:08 PM C:\Sirius\_T3\HCl18B27.t3r  
 S 0.9970 3/1/2018 12:08:08 PM C:\Sirius\_T3\HCl18B27.t3r  
 jH 0.8 3/1/2018 12:08:08 PM C:\Sirius\_T3\HCl18B27.t3r  
 jOH -0.4 3/1/2018 12:08:08 PM C:\Sirius\_T3\HCl18B27.t3r

### Titants

0.50 M HCl 0.993513 3/1/2018 12:08:08 PM C:\Sirius\_T3\HCl18B27.t3r  
 0.50 M KOH 0.999845 3/1/2018 12:08:09 PM C:\Sirius\_T3\KOH18B27.t3r

### Sample

M16\_octanol concentration factor 0.794  
 Base pKa 1 4.70  
 Acid pKa 2 8.94  
 logP (XH<sub>2</sub><sup>+</sup>) 0.03  
 logP (neutral XH) 3.06  
 logP (X<sup>-</sup>) -1.62

### Sample graphs

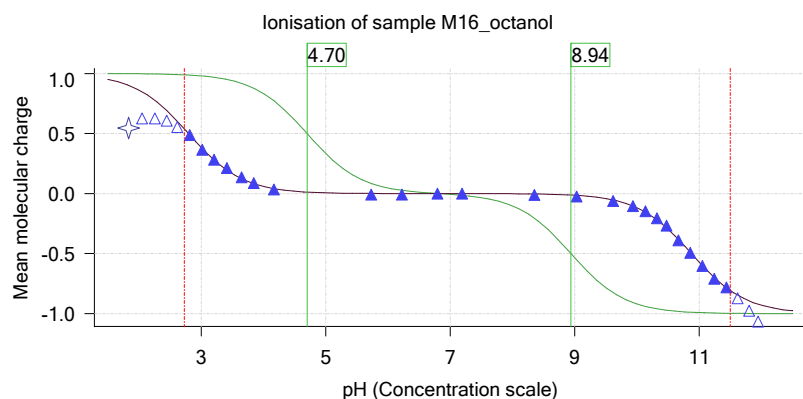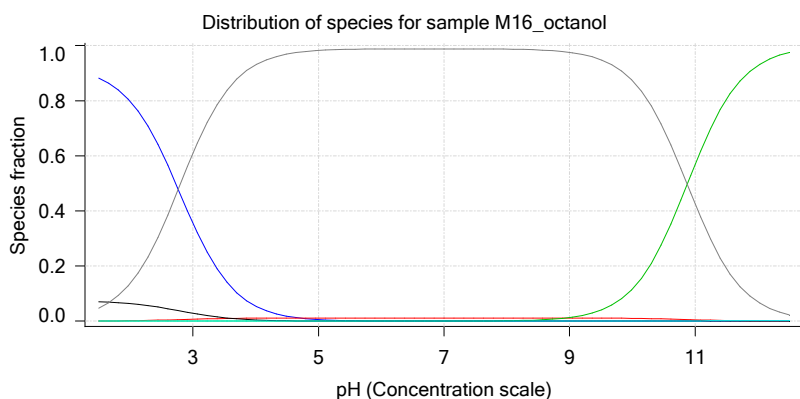

Sample name: **M16\_octanol**  
 Assay name: **pH-metric high logP**  
 Assay ID: **18C-01009**  
 Filename: **C:\Sirius\_T3\Mehtap\20180228\_exp28\_logP\_T3-2\18C-01009\_M16\_octanol\_pH-metric high logP.t3r**

Experiment start time: **3/1/2018 12:08:09 PM**  
 Analyst: **Pion**  
 Instrument ID: **T312060**

## Sample graphs (continued)

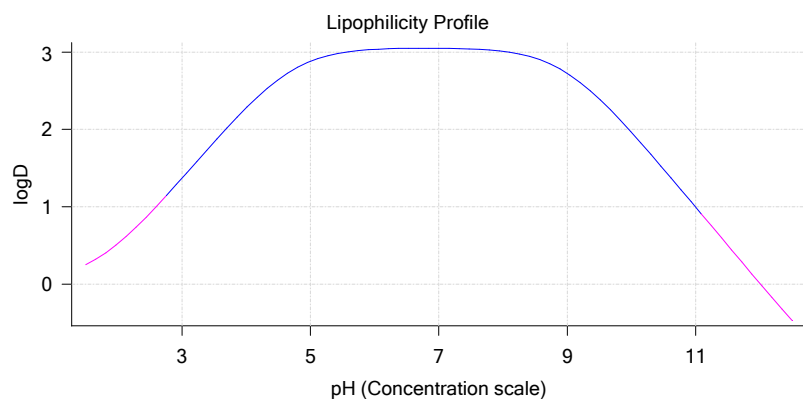

## Sample logD and percent species

| pH     | M16_octanol<br>logD | M16_octanol<br>M16_octanolH2 | M16_octanol<br>M16_octanolH | M16_octanol<br>M16_octanol | M16_octanol<br>M16_octanolH2* | M16_octanol<br>M16_octanolH* | M16_octanol<br>M16_octanol* | Comment       |
|--------|---------------------|------------------------------|-----------------------------|----------------------------|-------------------------------|------------------------------|-----------------------------|---------------|
| 1.000  | 0.11                | 91.17 %                      | 0.02 %                      | 0.00 %                     | 7.26 %                        | 1.55 %                       | 0.00 %                      | Stomach<br>pH |
| 1.200  | 0.15                | 90.33 %                      | 0.03 %                      | 0.00 %                     | 7.20 %                        | 2.44 %                       | 0.00 %                      |               |
| 2.000  | 0.52                | 79.86 %                      | 0.16 %                      | 0.00 %                     | 6.36 %                        | 13.62 %                      | 0.00 %                      |               |
| 3.000  | 1.37                | 35.65 %                      | 0.71 %                      | 0.00 %                     | 2.84 %                        | 60.80 %                      | 0.00 %                      |               |
| 4.000  | 2.28                | 5.45 %                       | 1.09 %                      | 0.00 %                     | 0.43 %                        | 93.02 %                      | 0.00 %                      |               |
| 5.000  | 2.88                | 0.58 %                       | 1.15 %                      | 0.00 %                     | 0.05 %                        | 98.23 %                      | 0.00 %                      |               |
| 6.000  | 3.03                | 0.06 %                       | 1.16 %                      | 0.00 %                     | 0.00 %                        | 98.78 %                      | 0.00 %                      | Blood pH      |
| 6.500  | 3.05                | 0.02 %                       | 1.16 %                      | 0.00 %                     | 0.00 %                        | 98.82 %                      | 0.00 %                      |               |
| 7.000  | 3.05                | 0.01 %                       | 1.16 %                      | 0.01 %                     | 0.00 %                        | 98.82 %                      | 0.00 %                      |               |
| 7.400  | 3.04                | 0.00 %                       | 1.16 %                      | 0.03 %                     | 0.00 %                        | 98.81 %                      | 0.00 %                      |               |
| 8.000  | 3.01                | 0.00 %                       | 1.15 %                      | 0.13 %                     | 0.00 %                        | 98.71 %                      | 0.00 %                      |               |
| 9.000  | 2.72                | 0.00 %                       | 1.14 %                      | 1.31 %                     | 0.00 %                        | 97.55 %                      | 0.00 %                      |               |
| 10.000 | 1.96                | 0.00 %                       | 1.02 %                      | 11.72 %                    | 0.00 %                        | 87.24 %                      | 0.02 %                      |               |
| 11.000 | 0.99                | 0.00 %                       | 0.50 %                      | 56.98 %                    | 0.00 %                        | 42.42 %                      | 0.10 %                      |               |
| 12.000 | 0.01                | 0.00 %                       | 0.08 %                      | 92.84 %                    | 0.00 %                        | 6.91 %                       | 0.17 %                      |               |

## Carbonate and acidity

Carbonate 0.194 mM  
 Acidity error 2.681 mM

## Other graphs

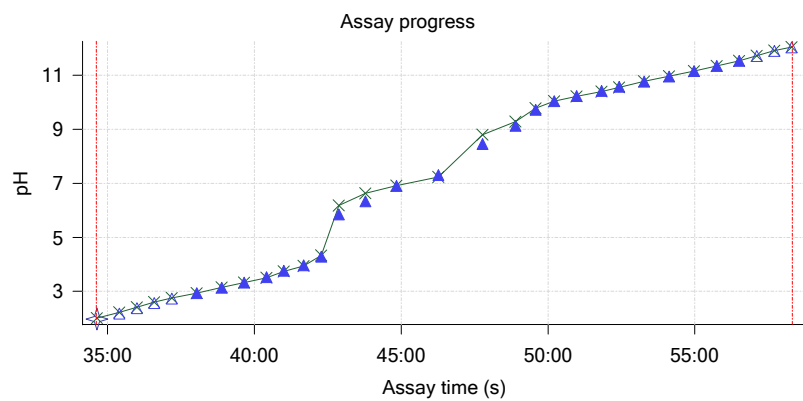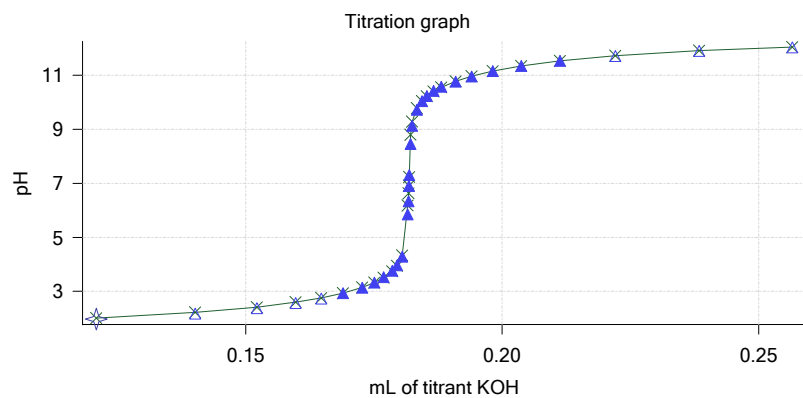



Sample name: **M16\_octanol**  
 Assay name: **pH-metric high logP**  
 Assay ID: **18C-01009**  
 Filename: **C:\Sirius\_T3\Mehtap\20180228\_exp28\_logP\_T3-2\18C-01009\_M16\_octanol\_pH-metric high logP.t3r**

Experiment start time: **3/1/2018 12:08:09 PM**  
 Analyst: **Pion**  
 Instrument ID: **T312060**

## Other graphs (continued)

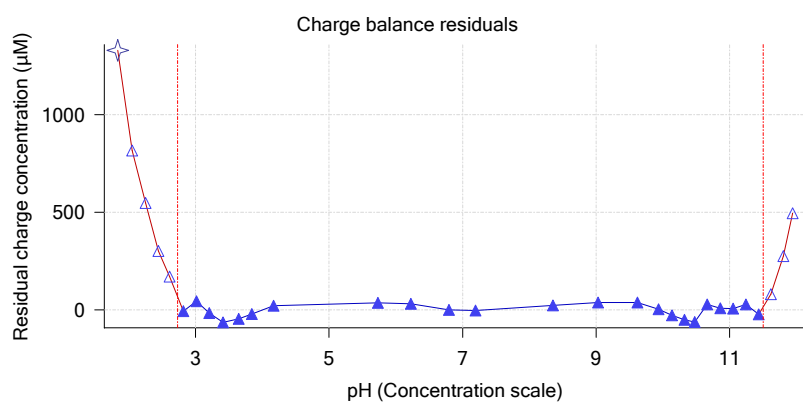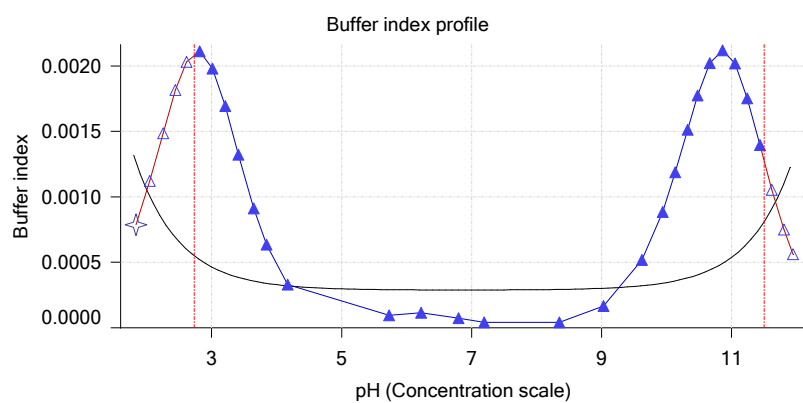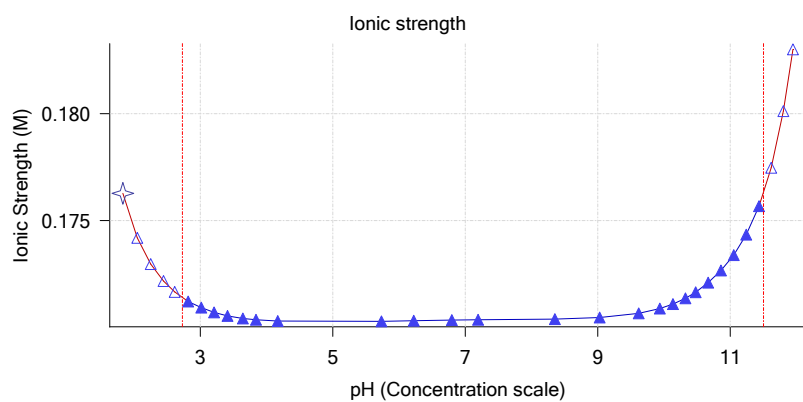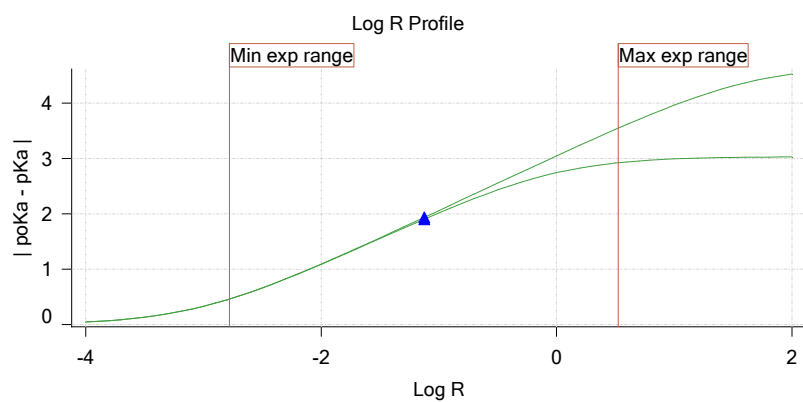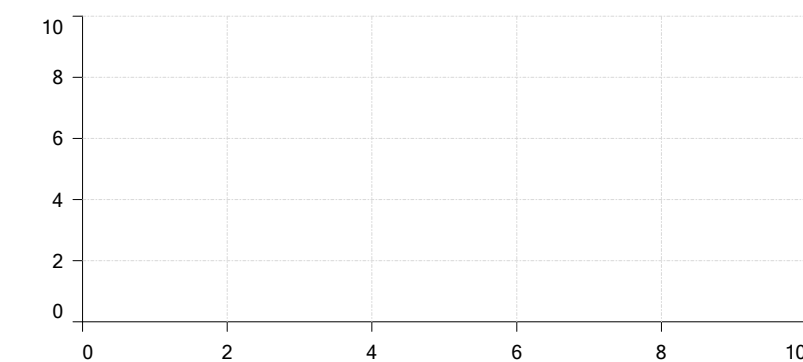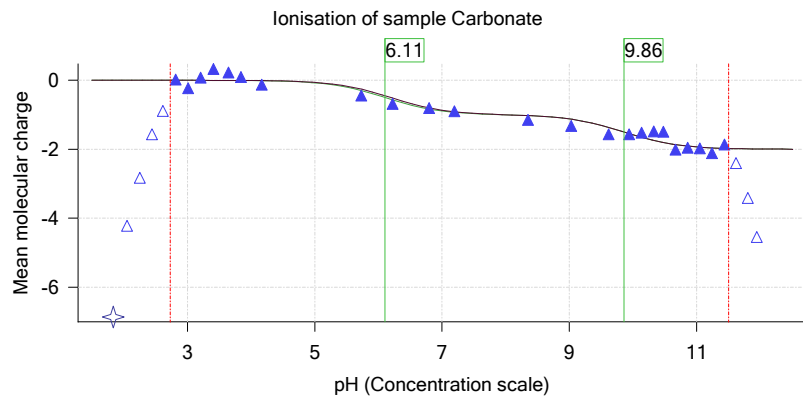

Sample name: **M16\_octanol**  
 Assay name: **pH-metric high logP**  
 Assay ID: **18C-01009**  
 Filename: **C:\Sirius\_T3\Mehtap\20180228\_exp28\_logP\_T3-2\18C-01009\_M16\_octanol\_pH-metric high logP.t3r**

Experiment start time: **3/1/2018 12:08:09 PM**  
 Analyst: **Pion**  
 Instrument ID: **T312060**

pH-metric high logP Titration 3 of 3 18C-01009 Points 63 to 92

## Overall results

RMSD 0.627  
 Average ionic strength 0.182 M  
 Average temperature 25.0°C  
 Partition ratio 0.2052 : 1  
 Analyte concentration range 3198.3 µM to 3391.8 µM  
 Total points considered 22 of 30

## Warnings and errors

Errors None  
 Warnings One or more logP values out of range  
 Excessive acidity error present

## Four-Plus parameters

Alpha 0.130 3/1/2018 12:08:08 PM C:\Sirius\_T3\HCl18B27.t3r  
 S 0.9970 3/1/2018 12:08:08 PM C:\Sirius\_T3\HCl18B27.t3r  
 jH 0.8 3/1/2018 12:08:08 PM C:\Sirius\_T3\HCl18B27.t3r  
 jOH -0.4 3/1/2018 12:08:08 PM C:\Sirius\_T3\HCl18B27.t3r

## Titrants

0.50 M HCl 0.993513 3/1/2018 12:08:08 PM C:\Sirius\_T3\HCl18B27.t3r  
 0.50 M KOH 0.999845 3/1/2018 12:08:09 PM C:\Sirius\_T3\KOH18B27.t3r

## Sample

M16\_octanol concentration factor 0.836  
 Base pKa 1 4.70  
 Acid pKa 2 8.94  
 logP (XH<sub>2</sub><sup>+</sup>) -5.10  
 logP (neutral XH) 3.01  
 logP (X<sup>-</sup>) -1.62

## Sample graphs

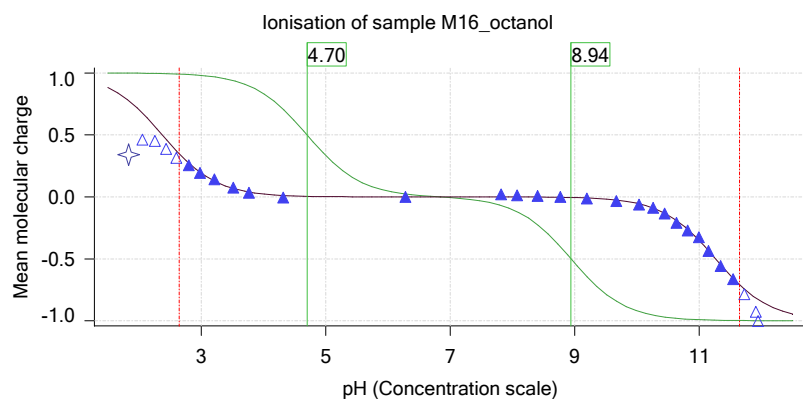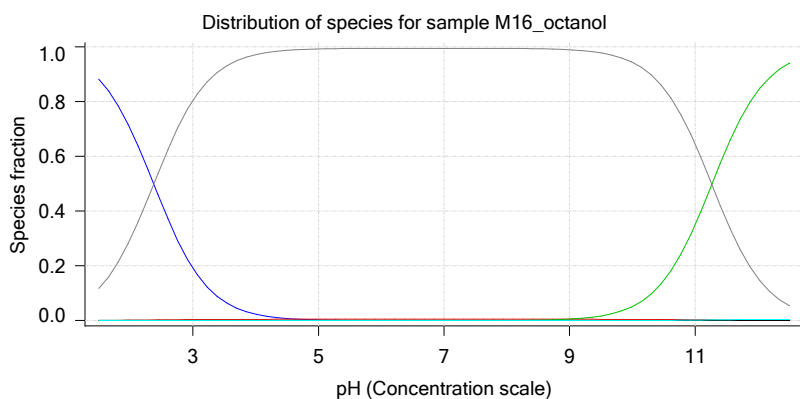

Sample name: **M16\_octanol**  
Assay name: **pH-metric high logP**  
Assay ID: **18C-01009**  
Filename: **C:\Sirius\_T3\Mehtap\20180228\_exp28\_logP\_T3-2\18C-01009\_M16\_octanol\_pH-metric high logP.t3r**

Experiment start time: **3/1/2018 12:08:09 PM**  
Analyst: **Pion**  
Instrument ID: **T312060**

## Sample graphs (continued)

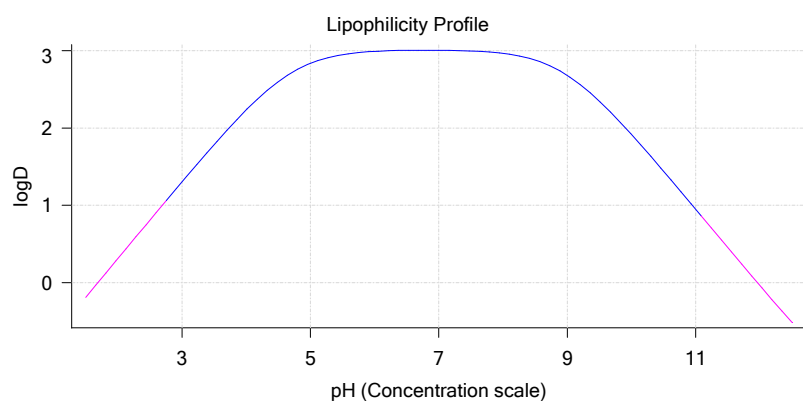

## Sample logD and percent species

| pH     | M16_octanol<br>logD | M16_octanol<br>M16_octanolH2 | M16_octanol<br>M16_octanolH | M16_octanol<br>M16_octanol | M16_octanol<br>M16_octanolH2* | M16_octanol<br>M16_octanolH* | M16_octanol<br>M16_octanol* | Comment       |
|--------|---------------------|------------------------------|-----------------------------|----------------------------|-------------------------------|------------------------------|-----------------------------|---------------|
| 1.000  | -0.69               | 95.95 %                      | 0.02 %                      | 0.00 %                     | 0.00 %                        | 4.03 %                       | 0.00 %                      | Stomach<br>pH |
| 1.200  | -0.49               | 93.73 %                      | 0.03 %                      | 0.00 %                     | 0.00 %                        | 6.24 %                       | 0.00 %                      |               |
| 2.000  | 0.31                | 70.32 %                      | 0.14 %                      | 0.00 %                     | 0.00 %                        | 29.54 %                      | 0.00 %                      |               |
| 3.000  | 1.30                | 19.16 %                      | 0.38 %                      | 0.00 %                     | 0.00 %                        | 80.46 %                      | 0.00 %                      |               |
| 4.000  | 2.23                | 2.31 %                       | 0.46 %                      | 0.00 %                     | 0.00 %                        | 97.22 %                      | 0.00 %                      | Blood pH      |
| 5.000  | 2.83                | 0.24 %                       | 0.47 %                      | 0.00 %                     | 0.00 %                        | 99.29 %                      | 0.00 %                      |               |
| 6.000  | 2.99                | 0.02 %                       | 0.47 %                      | 0.00 %                     | 0.00 %                        | 99.50 %                      | 0.00 %                      |               |
| 6.500  | 3.00                | 0.01 %                       | 0.47 %                      | 0.00 %                     | 0.00 %                        | 99.52 %                      | 0.00 %                      |               |
| 7.000  | 3.00                | 0.00 %                       | 0.47 %                      | 0.01 %                     | 0.00 %                        | 99.52 %                      | 0.00 %                      |               |
| 7.400  | 3.00                | 0.00 %                       | 0.47 %                      | 0.01 %                     | 0.00 %                        | 99.51 %                      | 0.00 %                      |               |
| 8.000  | 2.96                | 0.00 %                       | 0.47 %                      | 0.05 %                     | 0.00 %                        | 99.47 %                      | 0.00 %                      |               |
| 9.000  | 2.68                | 0.00 %                       | 0.47 %                      | 0.54 %                     | 0.00 %                        | 98.99 %                      | 0.00 %                      |               |
| 10.000 | 1.92                | 0.00 %                       | 0.45 %                      | 5.15 %                     | 0.00 %                        | 94.38 %                      | 0.03 %                      |               |
| 11.000 | 0.95                | 0.00 %                       | 0.31 %                      | 35.12 %                    | 0.00 %                        | 64.40 %                      | 0.17 %                      |               |
| 12.000 | -0.04               | 0.00 %                       | 0.07 %                      | 84.09 %                    | 0.00 %                        | 15.42 %                      | 0.41 %                      |               |

## Carbonate and acidity

Carbonate 0.281 mM  
Acidity error 2.477 mM

## Other graphs

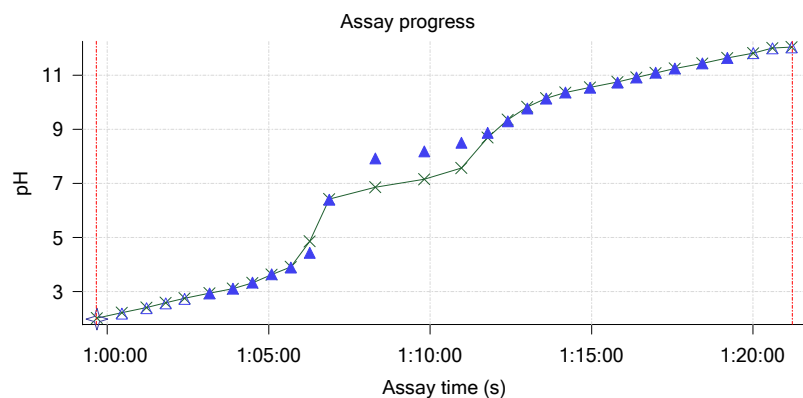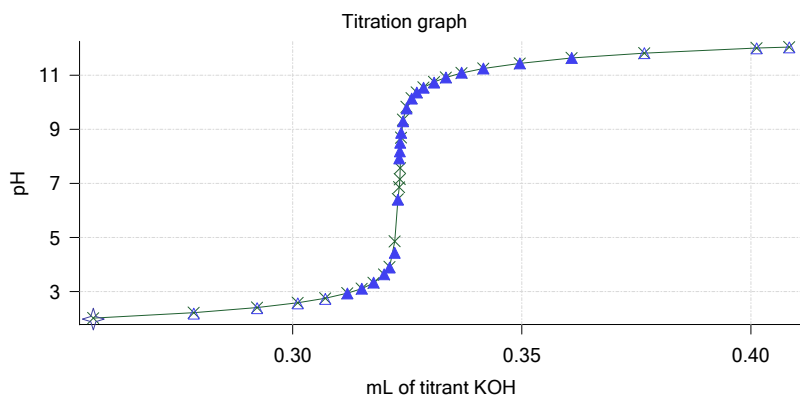

Sample name: **M16\_octanol**  
 Assay name: **pH-metric high logP**  
 Assay ID: **18C-01009**  
 Filename: **C:\Sirius\_T3\Mehtap\20180228\_exp28\_logP\_T3-2\18C-01009\_M16\_octanol\_pH-metric high logP.t3r**

Experiment start time: **3/1/2018 12:08:09 PM**  
 Analyst: **Pion**  
 Instrument ID: **T312060**

## Other graphs (continued)

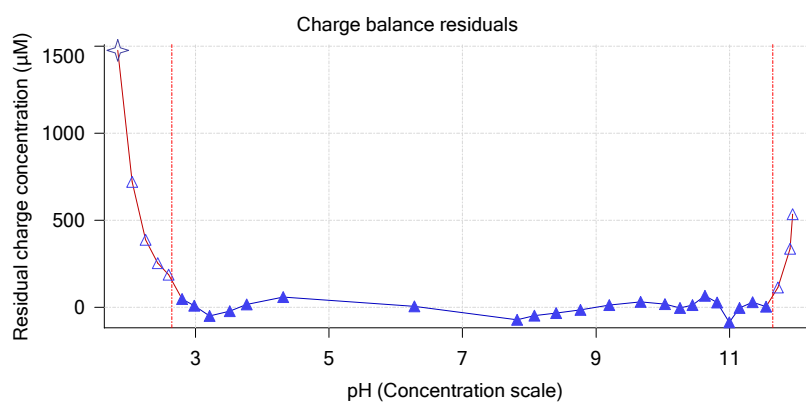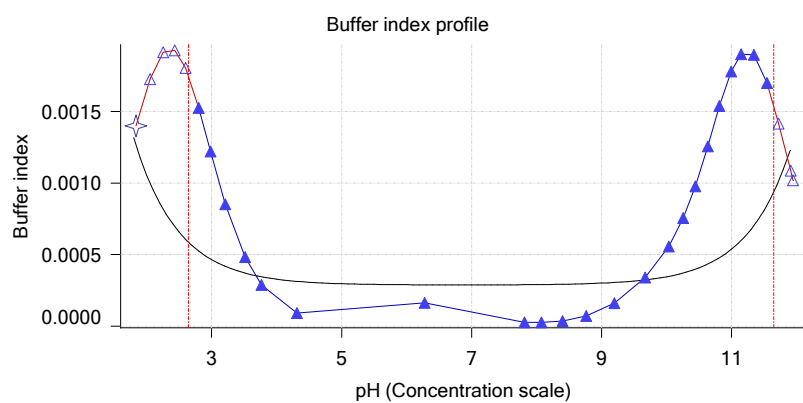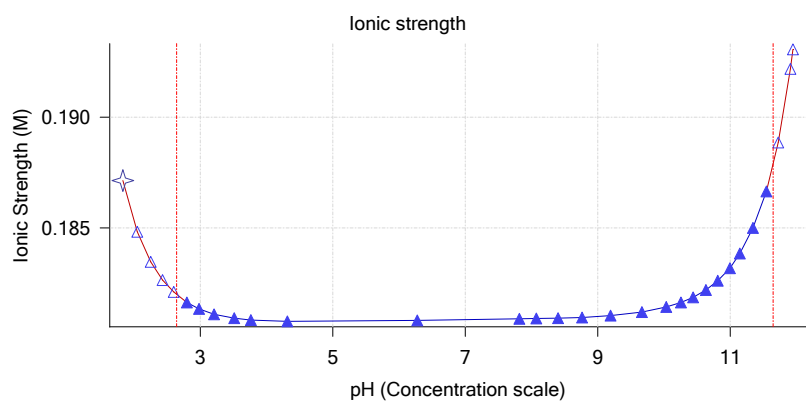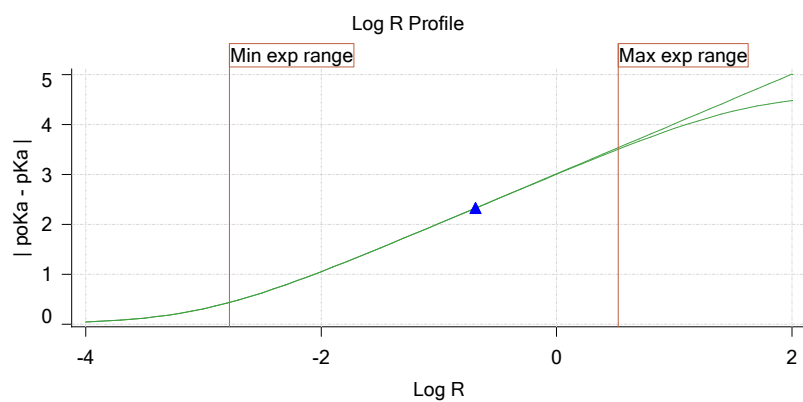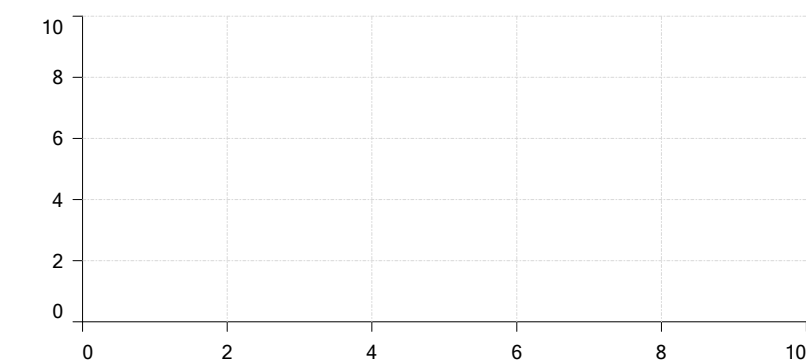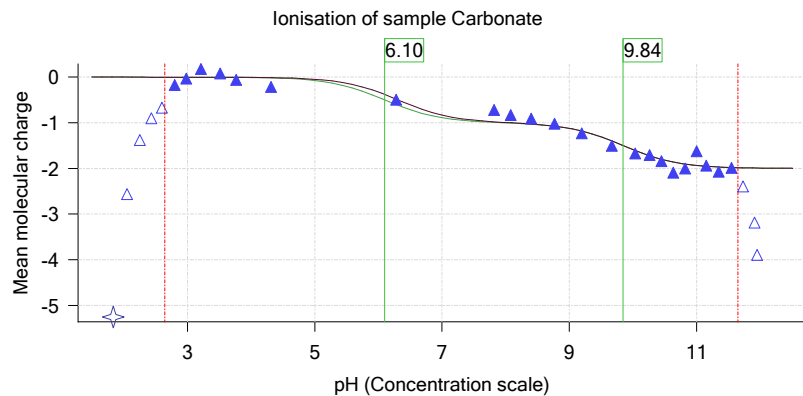

Sample name: **M16\_octanol**  
 Assay name: **pH-metric high logP**  
 Assay ID: **18C-01009**  
 Filename: **C:\Sirius\_T3\Mehtap\20180228\_exp28\_logP\_T3-2\18C-01009\_M16\_octanol\_pH-metric high logP.t3r**

Experiment start time: **3/1/2018 12:08:09 PM**  
 Analyst: **Pion**  
 Instrument ID: **T312060**

## Assay Model

| Settings                          | Value        | Date/Time changed    | Imported from      |
|-----------------------------------|--------------|----------------------|--------------------|
| Sample name                       | M16_octanol  | 2/27/2018 6:14:13 PM | User entered value |
| Sample by                         | Weight       |                      | Default value      |
| Sample weight                     | 0.001790 g   | 2/28/2018 4:25:54 PM | User entered value |
| Formula weight                    | 210.23 g/mol | 2/27/2018 5:08:55 PM | User entered value |
| Solubility                        | Unknown      |                      | Default value      |
| Molecular weight                  | 210.23       | 2/27/2018 5:08:55 PM | User entered value |
| Individual pKa ionic environments | No           |                      | Default value      |
| Number of pKas                    | 2            | 2/27/2018 5:08:55 PM | User entered value |
| Sample is a                       | Ampholyte    | 2/27/2018 5:08:55 PM | User entered value |
| pKa 1                             | 4.70         | 2/27/2018 5:08:55 PM | User entered value |
| Type                              | Base         | 2/27/2018 5:08:55 PM | User entered value |
| pKa 2                             | 8.94         | 2/27/2018 5:08:55 PM | User entered value |
| Type                              | Acid         | 2/27/2018 5:08:55 PM | User entered value |
| logp (XH2 +)                      | -0.97        | 2/27/2018 5:09:30 PM | User entered value |
| logP (neutral XH)                 | 1.47         | 2/27/2018 5:09:44 PM | User entered value |
| logP (X -)                        | -1.62        | 2/27/2018 5:09:50 PM | User entered value |

## Events

| Time    | Event             | Water      | Acid       | Base       | Octanol    | pH     | dpH/dt   | pH R-squared | pH SD   | dpH/dt time |
|---------|-------------------|------------|------------|------------|------------|--------|----------|--------------|---------|-------------|
| 8:39.5  | Initial pH = 3.74 |            |            |            |            |        |          |              |         |             |
| 11:44.1 | Data point 1      | 1.50000 mL | 0.04499 mL | 0.00202 mL | 0.04000 mL | 2.009  | -0.00786 | 0.25633      | 0.00077 | 10.0 s      |
| 12:30.3 | Data point 2      | 1.50000 mL | 0.04499 mL | 0.01726 mL | 0.04000 mL | 2.218  | -0.00029 | 0.00763      | 0.00016 | 10.0 s      |
| 13:06.0 | Data point 3      | 1.50000 mL | 0.04499 mL | 0.02667 mL | 0.04000 mL | 2.413  | -0.00594 | 0.13958      | 0.00079 | 10.0 s      |
| 13:41.5 | Data point 4      | 1.50000 mL | 0.04499 mL | 0.03269 mL | 0.04000 mL | 2.584  | -0.00084 | 0.06954      | 0.00016 | 10.0 s      |
| 14:27.4 | Data point 5      | 1.50000 mL | 0.04499 mL | 0.03702 mL | 0.04000 mL | 2.780  | -0.00378 | 0.06388      | 0.00074 | 10.0 s      |
| 15:02.9 | Data point 6      | 1.50000 mL | 0.04499 mL | 0.03972 mL | 0.04000 mL | 2.922  | -0.00866 | 0.21191      | 0.00093 | 10.0 s      |
| 15:48.8 | Data point 7      | 1.50000 mL | 0.04499 mL | 0.04259 mL | 0.04000 mL | 3.115  | -0.00483 | 0.80380      | 0.00027 | 10.0 s      |
| 16:39.8 | Data point 8      | 1.50000 mL | 0.04499 mL | 0.04485 mL | 0.04000 mL | 3.309  | -0.00755 | 0.21309      | 0.00081 | 10.0 s      |
| 17:30.8 | Data point 9      | 1.50000 mL | 0.04499 mL | 0.04706 mL | 0.04000 mL | 3.501  | -0.00612 | 0.78470      | 0.00034 | 10.0 s      |
| 18:21.9 | Data point 10     | 1.50000 mL | 0.04499 mL | 0.04920 mL | 0.04000 mL | 3.691  | -0.00337 | 0.03338      | 0.00091 | 10.0 s      |
| 19:12.8 | Data point 11     | 1.50000 mL | 0.04499 mL | 0.05092 mL | 0.04000 mL | 3.887  | -0.00649 | 0.12208      | 0.00092 | 10.0 s      |
| 20:03.7 | Data point 12     | 1.50000 mL | 0.04499 mL | 0.05216 mL | 0.04000 mL | 4.105  | -0.01178 | 0.65123      | 0.00072 | 10.0 s      |
| 20:39.2 | Data point 13     | 1.50000 mL | 0.04499 mL | 0.05306 mL | 0.04000 mL | 4.377  | -0.01852 | 0.90826      | 0.00096 | 10.5 s      |
| 21:15.1 | Data point 14     | 1.50000 mL | 0.04499 mL | 0.05407 mL | 0.04000 mL | 5.103  | -0.01578 | 0.79081      | 0.00088 | 13.0 s      |
| 21:53.5 | Data point 15     | 1.50000 mL | 0.04499 mL | 0.05468 mL | 0.04000 mL | 8.545  | -0.01967 | 0.99135      | 0.00098 | 34.5 s      |
| 22:53.5 | Data point 16     | 1.50000 mL | 0.04499 mL | 0.05527 mL | 0.04000 mL | 9.186  | -0.01692 | 0.94412      | 0.00086 | 10.0 s      |
| 23:28.9 | Data point 17     | 1.50000 mL | 0.04499 mL | 0.05628 mL | 0.04000 mL | 9.588  | -0.01207 | 0.94821      | 0.00061 | 10.0 s      |
| 24:04.3 | Data point 18     | 1.50000 mL | 0.04499 mL | 0.05713 mL | 0.04000 mL | 9.780  | -0.01206 | 0.54950      | 0.00080 | 10.0 s      |
| 24:50.2 | Data point 19     | 1.50000 mL | 0.04499 mL | 0.05842 mL | 0.04000 mL | 9.975  | -0.00092 | 0.02620      | 0.00028 | 10.5 s      |
| 25:26.2 | Data point 20     | 1.50000 mL | 0.04499 mL | 0.05962 mL | 0.04000 mL | 10.154 | -0.00816 | 0.82899      | 0.00044 | 10.0 s      |
| 26:01.6 | Data point 21     | 1.50000 mL | 0.04499 mL | 0.06070 mL | 0.04000 mL | 10.292 | -0.01383 | 0.62163      | 0.00087 | 10.0 s      |
| 26:52.5 | Data point 22     | 1.50000 mL | 0.04499 mL | 0.06235 mL | 0.04000 mL | 10.475 | -0.00623 | 0.21568      | 0.00066 | 10.0 s      |
| 27:43.4 | Data point 23     | 1.50000 mL | 0.04499 mL | 0.06430 mL | 0.04000 mL | 10.663 | -0.01087 | 0.60836      | 0.00069 | 10.0 s      |
| 28:34.5 | Data point 24     | 1.50000 mL | 0.04499 mL | 0.06700 mL | 0.04000 mL | 10.845 | 0.00564  | 0.16265      | 0.00069 | 10.5 s      |
| 29:26.1 | Data point 25     | 1.50000 mL | 0.04499 mL | 0.07013 mL | 0.04000 mL | 11.038 | -0.00670 | 0.84026      | 0.00036 | 10.0 s      |
| 30:12.0 | Data point 26     | 1.50000 mL | 0.04499 mL | 0.07354 mL | 0.04000 mL | 11.226 | -0.00717 | 0.22192      | 0.00075 | 10.0 s      |
| 30:47.5 | Data point 27     | 1.50000 mL | 0.04499 mL | 0.07806 mL | 0.04000 mL | 11.397 | 0.00185  | 0.09507      | 0.00030 | 10.0 s      |
| 31:33.5 | Data point 28     | 1.50000 mL | 0.04499 mL | 0.08443 mL | 0.04000 mL | 11.589 | -0.00034 | 0.00072      | 0.00063 | 10.0 s      |
| 32:09.1 | Data point 29     | 1.50000 mL | 0.04499 mL | 0.09501 mL | 0.04000 mL | 11.769 | -0.00357 | 0.09765      | 0.00056 | 10.0 s      |
| 32:45.0 | Data point 30     | 1.50000 mL | 0.04499 mL | 0.11117 mL | 0.04000 mL | 11.958 | 0.00119  | 0.00998      | 0.00059 | 10.0 s      |
| 33:20.6 | Data point 31     | 1.50000 mL | 0.04499 mL | 0.12091 mL | 0.04000 mL | 12.036 | 0.00213  | 0.35467      | 0.00018 | 10.0 s      |
| 34:38.0 | Data point 32     | 1.50000 mL | 0.17241 mL | 0.12091 mL | 0.14000 mL | 1.969  | -0.00814 | 0.79043      | 0.00045 | 10.0 s      |
| 35:24.3 | Data point 33     | 1.50000 mL | 0.17241 mL | 0.14019 mL | 0.14000 mL | 2.180  | -0.00761 | 0.40848      | 0.00059 | 10.0 s      |
| 35:59.9 | Data point 34     | 1.50000 mL | 0.17241 mL | 0.15219 mL | 0.14000 mL | 2.379  | 0.01002  | 0.94066      | 0.00051 | 10.0 s      |
| 36:35.6 | Data point 35     | 1.50000 mL | 0.17241 mL | 0.15974 mL | 0.14000 mL | 2.569  | 0.00480  | 0.68312      | 0.00029 | 10.0 s      |
| 37:11.1 | Data point 36     | 1.50000 mL | 0.17241 mL | 0.16472 mL | 0.14000 mL | 2.737  | 0.00482  | 0.88092      | 0.00025 | 10.0 s      |

Sample name: **M16\_octanol** Experiment start time: **3/1/2018 12:08:09 PM**  
 Assay name: **pH-metric high logP** Analyst: **Pion**  
 Assay ID: **18C-01009** Instrument ID: **T312060**  
 Filename: **C:\Sirius\_T3\Mehtap\20180228\_exp28\_logP\_T3-2\18C-01009\_M16\_octanol\_pH-metric high logP.t3r**

## Events (continued)

| Time      | Event         | Water      | Acid       | Base       | Octanol    | pH     | dpH/dt   | pH R-squared | pH SD   | dpH/dt time         |
|-----------|---------------|------------|------------|------------|------------|--------|----------|--------------|---------|---------------------|
| 38:02.2   | Data point 37 | 1.50000 mL | 0.17241 mL | 0.16898 mL | 0.14000 mL | 2.939  | -0.00481 | 0.19222      | 0.00054 | 10.0 s              |
| 38:53.3   | Data point 38 | 1.50000 mL | 0.17241 mL | 0.17272 mL | 0.14000 mL | 3.135  | 0.00012  | 0.00403      | 0.00010 | 10.0 s              |
| 39:39.2   | Data point 39 | 1.50000 mL | 0.17241 mL | 0.17512 mL | 0.14000 mL | 3.328  | 0.00518  | 0.27140      | 0.00049 | 10.0 s              |
| 40:25.0   | Data point 40 | 1.50000 mL | 0.17241 mL | 0.17693 mL | 0.14000 mL | 3.530  | -0.00192 | 0.46039      | 0.00014 | 10.0 s              |
| 41:00.4   | Data point 41 | 1.50000 mL | 0.17241 mL | 0.17858 mL | 0.14000 mL | 3.764  | -0.00045 | 0.04173      | 0.00011 | 10.0 s              |
| 41:41.0   | Data point 42 | 1.50000 mL | 0.17241 mL | 0.17954 mL | 0.14000 mL | 3.961  | 0.01048  | 0.42558      | 0.00079 | 10.0 s              |
| 42:16.4   | Data point 43 | 1.50000 mL | 0.17241 mL | 0.18055 mL | 0.14000 mL | 4.287  | 0.00274  | 0.05649      | 0.00057 | 10.5 s              |
| 42:52.4   | Data point 44 | 1.50000 mL | 0.17241 mL | 0.18156 mL | 0.14000 mL | 5.845  | -0.01422 | 0.55499      | 0.00094 | 24.0 s              |
| 43:47.0   | Data point 45 | 1.50000 mL | 0.17241 mL | 0.18175 mL | 0.14000 mL | 6.336  | -0.01876 | 0.92228      | 0.00096 | 33.0 s              |
| 44:50.5   | Data point 46 | 1.50000 mL | 0.17241 mL | 0.18184 mL | 0.14000 mL | 6.906  | -0.02960 | 0.95500      | 0.00150 | Timed out at 59.5 s |
| 46:15.9   | Data point 47 | 1.50000 mL | 0.17241 mL | 0.18191 mL | 0.14000 mL | 7.300  | -0.02968 | 0.97977      | 0.00148 | Timed out at 59.5 s |
| 47:46.5   | Data point 48 | 1.50000 mL | 0.17241 mL | 0.18215 mL | 0.14000 mL | 8.457  | -0.01552 | 0.97452      | 0.00078 | 41.5 s              |
| 48:53.6   | Data point 49 | 1.50000 mL | 0.17241 mL | 0.18248 mL | 0.14000 mL | 9.131  | -0.01766 | 0.85050      | 0.00095 | 15.5 s              |
| 49:34.5   | Data point 50 | 1.50000 mL | 0.17241 mL | 0.18337 mL | 0.14000 mL | 9.719  | -0.00134 | 0.00466      | 0.00097 | 13.0 s              |
| 50:13.0   | Data point 51 | 1.50000 mL | 0.17241 mL | 0.18436 mL | 0.14000 mL | 10.037 | -0.00738 | 0.26859      | 0.00070 | 10.0 s              |
| 50:58.7   | Data point 52 | 1.50000 mL | 0.17241 mL | 0.18532 mL | 0.14000 mL | 10.233 | 0.00095  | 0.02065      | 0.00033 | 10.0 s              |
| 51:49.7   | Data point 53 | 1.50000 mL | 0.17241 mL | 0.18667 mL | 0.14000 mL | 10.421 | -0.00379 | 0.74501      | 0.00022 | 10.5 s              |
| 52:25.6   | Data point 54 | 1.50000 mL | 0.17241 mL | 0.18815 mL | 0.14000 mL | 10.575 | -0.00945 | 0.32573      | 0.00082 | 10.0 s              |
| 53:16.7   | Data point 55 | 1.50000 mL | 0.17241 mL | 0.19092 mL | 0.14000 mL | 10.762 | -0.00222 | 0.36351      | 0.00018 | 10.0 s              |
| 54:07.8   | Data point 56 | 1.50000 mL | 0.17241 mL | 0.19405 mL | 0.14000 mL | 10.955 | -0.00583 | 0.12472      | 0.00082 | 10.0 s              |
| 54:58.8   | Data point 57 | 1.50000 mL | 0.17241 mL | 0.19817 mL | 0.14000 mL | 11.147 | -0.00232 | 0.32508      | 0.00020 | 10.0 s              |
| 55:44.8   | Data point 58 | 1.50000 mL | 0.17241 mL | 0.20372 mL | 0.14000 mL | 11.336 | -0.00054 | 0.03917      | 0.00013 | 10.0 s              |
| 56:30.8   | Data point 59 | 1.50000 mL | 0.17241 mL | 0.21129 mL | 0.14000 mL | 11.529 | 0.00672  | 0.53103      | 0.00046 | 10.0 s              |
| 57:06.5   | Data point 60 | 1.50000 mL | 0.17241 mL | 0.22204 mL | 0.14000 mL | 11.710 | 0.00008  | 0.00005      | 0.00057 | 10.0 s              |
| 57:42.4   | Data point 61 | 1.50000 mL | 0.17241 mL | 0.23838 mL | 0.14000 mL | 11.894 | 0.00523  | 0.08361      | 0.00089 | 10.0 s              |
| 58:18.3   | Data point 62 | 1.50000 mL | 0.17241 mL | 0.25654 mL | 0.14000 mL | 12.032 | 0.00844  | 0.20969      | 0.00091 | 10.0 s              |
| 59:40.6   | Data point 63 | 1.50000 mL | 0.31378 mL | 0.25654 mL | 0.44000 mL | 1.970  | -0.00419 | 0.48669      | 0.00030 | 10.0 s              |
| 1:00:27.0 | Data point 64 | 1.50000 mL | 0.31378 mL | 0.27848 mL | 0.44000 mL | 2.183  | -0.01035 | 0.62763      | 0.00065 | 20.0 s              |
| 1:01:12.7 | Data point 65 | 1.50000 mL | 0.31378 mL | 0.29229 mL | 0.44000 mL | 2.381  | -0.00423 | 0.05683      | 0.00088 | 10.0 s              |
| 1:01:48.4 | Data point 66 | 1.50000 mL | 0.31378 mL | 0.30115 mL | 0.44000 mL | 2.559  | 0.00526  | 0.10194      | 0.00081 | 10.0 s              |
| 1:02:24.0 | Data point 67 | 1.50000 mL | 0.31378 mL | 0.30717 mL | 0.44000 mL | 2.724  | 0.00672  | 0.26884      | 0.00064 | 10.0 s              |
| 1:03:09.9 | Data point 68 | 1.50000 mL | 0.31378 mL | 0.31195 mL | 0.44000 mL | 2.924  | 0.01126  | 0.42408      | 0.00085 | 18.0 s              |
| 1:03:53.4 | Data point 69 | 1.50000 mL | 0.31378 mL | 0.31512 mL | 0.44000 mL | 3.103  | 0.00666  | 0.70178      | 0.00039 | 10.5 s              |
| 1:04:29.5 | Data point 70 | 1.50000 mL | 0.31378 mL | 0.31771 mL | 0.44000 mL | 3.331  | 0.00922  | 0.44168      | 0.00069 | 10.5 s              |
| 1:05:05.5 | Data point 71 | 1.50000 mL | 0.31378 mL | 0.32001 mL | 0.44000 mL | 3.635  | 0.00860  | 0.24150      | 0.00086 | 10.0 s              |
| 1:05:41.0 | Data point 72 | 1.50000 mL | 0.31378 mL | 0.32117 mL | 0.44000 mL | 3.886  | 0.00769  | 0.25705      | 0.00075 | 10.0 s              |
| 1:06:16.4 | Data point 73 | 1.50000 mL | 0.31378 mL | 0.32227 mL | 0.44000 mL | 4.432  | 0.00226  | 0.01769      | 0.00084 | 10.5 s              |
| 1:06:52.3 | Data point 74 | 1.50000 mL | 0.31378 mL | 0.32298 mL | 0.44000 mL | 6.389  | -0.01886 | 0.93280      | 0.00097 | 55.5 s              |
| 1:08:18.4 | Data point 75 | 1.50000 mL | 0.31378 mL | 0.32326 mL | 0.44000 mL | 7.922  | -0.05162 | 0.99435      | 0.00256 | Timed out at 59.5 s |
| 1:09:48.9 | Data point 76 | 1.50000 mL | 0.31378 mL | 0.32340 mL | 0.44000 mL | 8.182  | -0.01649 | 0.68209      | 0.00099 | 44.0 s              |
| 1:10:58.4 | Data point 77 | 1.50000 mL | 0.31378 mL | 0.32352 mL | 0.44000 mL | 8.506  | -0.01726 | 0.75067      | 0.00098 | 23.0 s              |
| 1:11:46.7 | Data point 78 | 1.50000 mL | 0.31378 mL | 0.32371 mL | 0.44000 mL | 8.870  | -0.01698 | 0.74469      | 0.00097 | 12.0 s              |
| 1:12:24.1 | Data point 79 | 1.50000 mL | 0.31378 mL | 0.32411 mL | 0.44000 mL | 9.299  | -0.01727 | 0.74481      | 0.00099 | 11.0 s              |
| 1:13:00.6 | Data point 80 | 1.50000 mL | 0.31378 mL | 0.32491 mL | 0.44000 mL | 9.770  | -0.01163 | 0.54195      | 0.00078 | 10.0 s              |
| 1:13:36.0 | Data point 81 | 1.50000 mL | 0.31378 mL | 0.32601 mL | 0.44000 mL | 10.135 | -0.00037 | 0.00108      | 0.00056 | 10.0 s              |
| 1:14:11.5 | Data point 82 | 1.50000 mL | 0.31378 mL | 0.32709 mL | 0.44000 mL | 10.357 | -0.00019 | 0.00290      | 0.00018 | 10.0 s              |
| 1:14:57.2 | Data point 83 | 1.50000 mL | 0.31378 mL | 0.32858 mL | 0.44000 mL | 10.542 | 0.00649  | 0.22886      | 0.00067 | 10.0 s              |
| 1:15:48.3 | Data point 84 | 1.50000 mL | 0.31378 mL | 0.33088 mL | 0.44000 mL | 10.732 | 0.00792  | 0.45250      | 0.00058 | 10.0 s              |
| 1:16:23.8 | Data point 85 | 1.50000 mL | 0.31378 mL | 0.33349 mL | 0.44000 mL | 10.912 | 0.00857  | 0.47694      | 0.00061 | 10.0 s              |
| 1:16:59.3 | Data point 86 | 1.50000 mL | 0.31378 mL | 0.33688 mL | 0.44000 mL | 11.093 | 0.00726  | 0.16909      | 0.00087 | 10.0 s              |
| 1:17:34.9 | Data point 87 | 1.50000 mL | 0.31378 mL | 0.34163 mL | 0.44000 mL | 11.245 | 0.00646  | 0.13436      | 0.00087 | 10.0 s              |
| 1:18:26.0 | Data point 88 | 1.50000 mL | 0.31378 mL | 0.34962 mL | 0.44000 mL | 11.440 | 0.00609  | 0.16576      | 0.00074 | 10.0 s              |
| 1:19:12.1 | Data point 89 | 1.50000 mL | 0.31378 mL | 0.36091 mL | 0.44000 mL | 11.639 | 0.01231  | 0.61053      | 0.00078 | 22.5 s              |
| 1:20:00.5 | Data point 90 | 1.50000 mL | 0.31378 mL | 0.37676 mL | 0.44000 mL | 11.816 | 0.00711  | 0.92311      | 0.00037 | 10.0 s              |

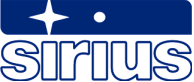

## Assay Events

Sample name: **M16\_octanol** Experiment start time: **3/1/2018 12:08:09 PM**  
Assay name: **pH-metric high logP** Analyst: **Pion**  
Assay ID: **18C-01009** Instrument ID: **T312060**  
Filename: **C:\Sirius\_T3\Mehtap\20180228\_exp28\_logP\_T3-2\18C-01009\_M16\_octanol\_pH-metric high logP.t3r**

**Events (continued)**

| Time      | Event         | Water      | Acid       | Base       | Octanol    | pH     | dpH/dt  | pH R-squared | pH SD   | dpH/dt<br>time |
|-----------|---------------|------------|------------|------------|------------|--------|---------|--------------|---------|----------------|
| 1:20:36.5 | Data point 91 | 1.50000 mL | 0.31378 mL | 0.40127 mL | 0.44000 mL | 11.997 | 0.01097 | 0.61510      | 0.00069 | 10.0 s         |
| 1:21:12.1 | Data point 92 | 1.50000 mL | 0.31378 mL | 0.40837 mL | 0.44000 mL | 12.034 | 0.01274 | 0.67396      | 0.00077 | 10.0 s         |
| 1:21:31.3 | Assay volumes | 1.50000 mL | 0.31378 mL | 0.40837 mL | 0.44000 mL |        |         |              |         |                |



Sample name: **M16\_octanol**  
 Assay name: **pH-metric high logP**  
 Assay ID: **18C-01009**  
 Filename: **C:\Sirius\_T3\Mehtap\20180228\_exp28\_logP\_T3-2\18C-01009\_M16\_octanol\_pH-metric high logP.t3r**

Experiment start time: **3/1/2018 12:08:09 PM**  
 Analyst: **Pion**  
 Instrument ID: **T312060**

## Assay Settings

| Setting                             | Value              | Original Value | Date/Time changed | Imported from |
|-------------------------------------|--------------------|----------------|-------------------|---------------|
| <b>General Settings</b>             |                    |                |                   |               |
| Analyst name                        | Pion               |                |                   |               |
| <b>Standard Experiment Settings</b> |                    |                |                   |               |
| Number of titrations                | 3                  |                |                   |               |
| Minimum pH                          | 2.000              |                |                   |               |
| Maximum pH                          | 12.000             |                |                   |               |
| pH step between points of           | 0.200              |                |                   |               |
| Minimum titrant addition            | 0.00002 mL         |                |                   |               |
| Maximum titrant addition            | 0.10000 mL         |                |                   |               |
| Argon flow rate                     | 100%               |                |                   |               |
| Start titration using               | Cautious pH adjust |                |                   |               |
| <b>Advanced General Settings</b>    |                    |                |                   |               |
| Detect turbidity using              | None               |                |                   |               |
| Collect turbidity sensor data       | No                 |                |                   |               |
| Collect UV spectra                  | No                 |                |                   |               |
| Stir after titrant addition for     | 5 seconds          |                |                   |               |
| For titrant addition, stir at       | 10%                |                |                   |               |
| <b>Titration Pre-Dose</b>           |                    |                |                   |               |
| Titration pre-dose                  | None               |                |                   |               |
| <b>Assay Medium</b>                 |                    |                |                   |               |
| ISA water volume                    | 1.50 mL            |                |                   |               |
| Water added                         | Automatic          |                |                   |               |
| Partition solvent type              | Octanol            |                |                   |               |
| Partition volume                    | 0.040 mL           |                |                   |               |
| Partition solvent added             | Automatic          |                |                   |               |
| After partition addition, stir for  | 1 seconds          |                |                   |               |
| <b>Sample Sonication</b>            |                    |                |                   |               |
| Sonicate                            | Yes                |                |                   |               |
| Adjust pH for sonication            | No                 |                |                   |               |
| Sonicate for                        | 300 seconds        |                |                   |               |
| After sonication stir for           | 5 seconds          |                |                   |               |
| <b>Sample Dissolution</b>           |                    |                |                   |               |
| Perform a dissolution stage         | Yes                |                |                   |               |
| Adjust and hold pH for dissolution  | To start pH        |                |                   |               |
| Stir to dissolve for                | 120 seconds        |                |                   |               |
| For dissolution, stir at            | 10%                |                |                   |               |
| <b>Carbonate purge</b>              |                    |                |                   |               |
| Perform a carbonate purge           | No                 |                |                   |               |
| <b>Temperature Control</b>          |                    |                |                   |               |
| Wait for temperature                | Yes                |                |                   |               |
| Required start temperature          | 25.0°C             |                |                   |               |
| Acceptable deviation                | 0.5°C              |                |                   |               |
| Time to wait                        | 60 seconds         |                |                   |               |
| Stir speed of                       | 50%                |                |                   |               |
| <b>Titration 1</b>                  |                    |                |                   |               |
| Titrate from                        | Low to high pH     |                |                   |               |
| Adjust to start pH                  | Yes                |                |                   |               |
| After pH adjust stir for            | 30 seconds         |                |                   |               |
| Stir to allow partitioning for      | 15 seconds         |                |                   |               |
| Stirrer speed for partitioning      | 50%                |                |                   |               |
| <b>Titration 2</b>                  |                    |                |                   |               |
| Titrate from                        | Low to high pH     |                |                   |               |
| Add additional water                | 0.00 mL            |                |                   |               |
| Additional partition solvent volume | 0.100 mL           |                |                   |               |
| Additional partition solvent added  | Automatic          |                |                   |               |
| After pH adjust stir for            | 30 seconds         |                |                   |               |
| Stir to allow partitioning for      | 15 seconds         |                |                   |               |
| Stirrer speed for partitioning      | 55%                |                |                   |               |



Sample name: **M16\_octanol**  
 Assay name: **pH-metric high logP**  
 Assay ID: **18C-01009**  
 Filename: **C:\Sirius\_T3\Mehtap\20180228\_exp28\_logP\_T3-2\18C-01009\_M16\_octanol\_pH-metric high logP.t3r**

Experiment start time: **3/1/2018 12:08:09 PM**  
 Analyst: **Pion**  
 Instrument ID: **T312060**

## Assay Settings (continued)

| Setting                             | Value          | Original Value | Date/Time changed | Imported from |
|-------------------------------------|----------------|----------------|-------------------|---------------|
| <b>Titration 3</b>                  |                |                |                   |               |
| Titrate from                        | Low to high pH |                |                   |               |
| Add additional water                | 0.00 mL        |                |                   |               |
| Additional partition solvent volume | 0.300 mL       |                |                   |               |
| Additional partition solvent added  | Automatic      |                |                   |               |
| After pH adjust stir for            | 30 seconds     |                |                   |               |
| Stir to allow partitioning for      | 15 seconds     |                |                   |               |
| Stirrer speed for partitioning      | 60%            |                |                   |               |
| <b>Data Point Stability</b>         |                |                |                   |               |
| Stir during data point collection   | No             |                |                   |               |
| Delay before data point collection  | 0 seconds      |                |                   |               |
| Number of points to average         | 20 points      |                |                   |               |
| Time interval between points        | 0.50 seconds   |                |                   |               |
| Required maximum standard deviation | 0.00100 dpH/dt |                |                   |               |
| Stability timeout after             | 60 seconds     |                |                   |               |

## Calibration Settings

| Setting                   | Value  | Date/Time changed    | Imported from             |
|---------------------------|--------|----------------------|---------------------------|
| Four-Plus alpha           | 0.130  | 3/1/2018 12:08:08 PM | C:\Sirius_T3\HCl18B27.t3r |
| Four-Plus S               | 0.9970 | 3/1/2018 12:08:08 PM | C:\Sirius_T3\HCl18B27.t3r |
| Four-Plus jH              | 0.8    | 3/1/2018 12:08:08 PM | C:\Sirius_T3\HCl18B27.t3r |
| Four-Plus jOH             | -0.4   | 3/1/2018 12:08:08 PM | C:\Sirius_T3\HCl18B27.t3r |
| Base concentration factor | 1.000  | 3/1/2018 12:08:09 PM | C:\Sirius_T3\KOH18B27.t3r |
| Acid concentration factor | 0.994  | 3/1/2018 12:08:08 PM | C:\Sirius_T3\HCl18B27.t3r |

## Instrument Settings

| Setting              | Value                      | Batch Id    | Install date           |
|----------------------|----------------------------|-------------|------------------------|
| Instrument owner     | Merck                      |             |                        |
| Instrument ID        | T312060                    |             |                        |
| Instrument type      | T3 Simulator               |             |                        |
| Software version     | 1.1.3.0                    |             |                        |
| Dispenser module     |                            | T3DM1200361 | 3/31/2009 5:24:52 AM   |
| Dispenser 0          | Water                      |             | 3/31/2009 5:25:05 AM   |
| Syringe volume       | 2.5 mL                     |             |                        |
| Firmware version     | 1.2.1(r2)                  |             |                        |
| Titrant              | Water (0.15 M KCl)         | 02-06-2018  | 2/27/2018 10:05:59 AM  |
| Dispenser 2          | Acid                       |             | 3/31/2009 5:25:11 AM   |
| Syringe volume       | 0.5 mL                     |             |                        |
| Firmware version     | 1.2.1(r2)                  |             |                        |
| Titrant              | Acid (0.5 M HCl)           | 02-27-2018  | 2/27/2018 10:27:22 AM  |
| Dispenser 1          | Base                       |             | 3/31/2009 5:25:21 AM   |
| Syringe volume       | 0.5 mL                     |             |                        |
| Firmware version     | 1.2.1(r2)                  |             |                        |
| Titrant              | Base (0.5 M KOH)           | 9/22/2017   | 2/27/2018 10:21:22 AM  |
| Dispenser 5          | Cosolvent                  |             | 3/31/2009 5:26:24 AM   |
| Syringe volume       | 2.5 mL                     |             |                        |
| Firmware version     | 1.2.1(r2)                  |             |                        |
| Distribution valve 5 | Distribution Valve         |             | 3/31/2009 5:28:19 AM   |
| Firmware version     | 1.1.3                      |             |                        |
| Port A               | Methanol (80%, 0.15 M KCl) | 09-26-17    | 2/7/2018 9:42:01 AM    |
| Port B               | Cyclohexane                | 11-01-17    | 2/27/2018 10:37:57 AM  |
| Dispenser 3          | Buffer                     |             | 8/3/2010 5:05:16 AM    |
| Syringe volume       | 0.5 mL                     |             |                        |
| Firmware version     | 1.2.1(r2)                  |             |                        |
| Titrant              | Dodecane                   | 2018/01/31  | 2/28/2018 10:18:04 AM  |
| Dispenser 6          | Octanol                    |             | 10/22/2010 10:52:43 AM |

Sample name: **M16\_octanol**  
 Assay name: **pH-metric high logP**  
 Assay ID: **18C-01009**  
 Filename: **C:\Sirius\_T3\Mehtap\20180228\_exp28\_logP\_T3-2\18C-01009\_M16\_octanol\_pH-metric high logP.t3r**

Experiment start time: **3/1/2018 12:08:09 PM**  
 Analyst: **Pion**  
 Instrument ID: **T312060**

## Instrument Settings (continued)

| Setting                                   | Value                      | Batch Id    | Install date           |
|-------------------------------------------|----------------------------|-------------|------------------------|
| Syringe volume                            | 0.5 mL                     |             |                        |
| Firmware version                          | 1.2.1(r2)                  |             |                        |
| Titrant                                   | Octanol                    | 01-31-2018  | 2/27/2018 9:59:35 AM   |
| Titration                                 |                            | T3TM1200161 | 3/31/2009 5:24:17 AM   |
| Horizontal axis firmware version          | 1.17 AI1DI2DO2 Stepper 2   |             |                        |
| Vertical axis firmware version            | 1.17 AI1DI2DO2 Stepper 2   |             |                        |
| Chassis I/O firmware version              | 1.11 AI1DI0DO4 Norgren I/O |             |                        |
| Probe I/O firmware version                | 1.1.1                      |             |                        |
| Electrode                                 | T3 Electrode               | T3E0923     | 1/23/2018 2:01:00 PM   |
| E0 calibration                            | +4.26 mV                   |             | 3/1/2018 12:08:36 PM   |
| Filling solution                          | 3M KCl                     | KCL097      | 2/27/2018 9:49:43 AM   |
| Liquids                                   |                            |             |                        |
| Wash 1                                    | 50% IPA:50% Water          |             | 2/28/2018 10:23:32 AM  |
| Wash 2                                    | 0.5% Triton X-100 in H2O   |             | 2/28/2018 10:23:34 AM  |
| Buffer position 1                         | pH7 Wash                   |             | 2/28/2018 10:24:06 AM  |
| Buffer position 2                         | pH 7                       |             | 2/28/2018 10:24:08 AM  |
| Storage position                          |                            |             | 2/28/2018 10:21:14 AM  |
| Wash water                                | 8.2e+003 mL                | 02-27-2018  | 2/27/2018 9:54:39 AM   |
| Waste                                     | 7.3e+003 mL                |             | 11/28/2017 10:36:29 AM |
| Temperature controller                    |                            |             | 8/5/2010 6:35:13 AM    |
| Turbidity detector                        |                            |             | 3/31/2009 5:24:45 AM   |
| Spectrometer                              |                            | 074811      | 11/23/2010 11:22:28 AM |
| Dip probe                                 |                            | 10196       |                        |
| Wavelength coefficient A0                 | 183.333                    |             |                        |
| Wavelength coefficient A1                 | 2.21568                    |             |                        |
| Wavelength coefficient A2                 | -0.000289308               |             |                        |
| Total lamp lit time                       | 112:08:55                  |             | 11/23/2010 11:22:28 AM |
| Calibrated on                             | 2/27/2018 10:40:38 AM      |             |                        |
| Integration time                          | 40                         |             |                        |
| Scans averaged                            | 10                         |             |                        |
| Autoloader                                |                            | T3AL1200345 | 11/10/2015 9:34:13 AM  |
| Left-right axis firmware version          | 1.17 AI1DI2DO2 Stepper 2   |             |                        |
| Front-back axis firmware version          | 1.17 AI1DI2DO2 Stepper 2   |             |                        |
| Vertical axis firmware version            | 1.17 AI1DI2DO2 Stepper 2   |             |                        |
| Chassis I/O firmware version              | 1.11 AI1DI0DO4 Norgren I/O |             |                        |
| Configuration                             |                            |             |                        |
| Alternate titration position              | Titration position         |             |                        |
| Alternate reference position              | Reference position         |             |                        |
| Maximum standard vial volume              | 3.50 mL                    |             |                        |
| Maximum alternate vial volume             | 25.00 mL                   |             |                        |
| Automatic action idle period              | 5 minute(s)                |             |                        |
| Titration tube volume                     | 1.3 mL                     |             |                        |
| Syringe flush count                       | 3.50                       |             |                        |
| Flowing wash pump volume                  | 20.0 mL                    |             |                        |
| Flowing wash stir duration                | 5 s                        |             |                        |
| Flowing wash stir speed                   | 30%                        |             |                        |
| Solvent wash stir duration                | 5 s                        |             |                        |
| Solvent wash stir speed                   | 30%                        |             |                        |
| Surfactant wash stir duration             | 5 s                        |             |                        |
| Surfactant wash stir speed                | 30%                        |             |                        |
| E0 calibration minimum number of points   | 10                         |             |                        |
| E0 calibration maximum standard deviation | 0.01500                    |             |                        |
| E0 calibration timeout period             | 60 s                       |             |                        |
| E0 calibration stir duration              | 5 s                        |             |                        |
| E0 calibration preparation stir speed     | 30%                        |             |                        |
| E0 calibration buffer wash stir duration  | 5 s                        |             |                        |
| E0 calibration buffer wash stir speed     | 30%                        |             |                        |
| E0 calibration reading stir speed         | 0%                         |             |                        |

|              |                                                                                                   |                        |                             |
|--------------|---------------------------------------------------------------------------------------------------|------------------------|-----------------------------|
| Sample name: | <b>M16_octanol</b>                                                                                | Experiment start time: | <b>3/1/2018 12:08:09 PM</b> |
| Assay name:  | <b>pH-metric high logP</b>                                                                        | Analyst:               | <b>Pion</b>                 |
| Assay ID:    | <b>18C-01009</b>                                                                                  | Instrument ID:         | <b>T312060</b>              |
| Filename:    | <b>C:\Sirius_T3\Mehtap\20180228_exp28_logP_T3-2\18C-01009_M16_octanol_pH-metric high logP.t3r</b> |                        |                             |

## Instrument Settings (continued)

| Setting                                     | Value   | Batch Id | Install date |
|---------------------------------------------|---------|----------|--------------|
| Spectrometer calibration stir duration      | 5 s     |          |              |
| Spectrometer calibration stir speed         | 30%     |          |              |
| Spectrometer calibration wash pump volume   | 20.0 mL |          |              |
| Spectrometer calibration wash stir duration | 5 s     |          |              |
| Spectrometer calibration wash stir speed    | 30%     |          |              |
| Overhead dispense height                    | 10000   |          |              |

## Refinement Settings

| Setting                        | Value    | Default value |
|--------------------------------|----------|---------------|
| Turbidity detection method     | None     | None          |
| Turbidity wavelength to assess | 500.0 nm | 500.0 nm      |
| Turbidity maximum absorbance   | 0.100    | 0.100         |
| Turbidity probe threshold      | 50.00    | 50.00         |

## Experiment Log

[2:16] Air gap created for Water (0.15 M KCl)  
 [2:17] Air gap created for Acid (0.5 M HCl)  
 [2:17] Air gap created for Base (0.5 M KOH)  
 [2:17] Air gap released for Water (0.15 M KCl)  
 [2:21] Titrator arm moved over Titration position  
 [2:21] Titration 1 of 3  
 [2:21] Adding initial titrants  
 [2:21] Automatically add 1.50000 mL of water  
 [2:46] Dispensed 1.500000 mL of Water (0.15 M KCl)  
 [2:51] Titrator arm moved over Drain  
 [8:32] Titrator arm moved to Titration position  
 [8:32] Argon flow rate set to 100  
 [8:32] Stirrer speed set to 10  
 [8:37] Automatically add 0.04000 mL of Octanol  
 [8:38] Dispensed 0.040005 mL of Octanol  
 [8:39] Initial pH = 3.74  
 [8:39] Iterative adjust 3.74 -> 2.00  
 [8:39] pH 3.74 -> 2.00  
 [8:41] Air gap released for Acid (0.5 M HCl)  
 [8:41] Dispensed 0.042615 mL of Acid (0.5 M HCl)  
 [8:46] pH 2.02 -> 2.00  
 [8:47] Dispensed 0.002375 mL of Acid (0.5 M HCl)  
 [8:52] Holding pH 2.00  
 [10:52] Stirrer speed set to 0  
 [10:52] Stirrer speed set to 50  
 [10:52] Iterative adjust 1.98 -> 2.00  
 [10:52] pH 1.98 -> 2.00  
 [10:53] Air gap released for Base (0.5 M KOH)  
 [10:53] Dispensed 0.002023 mL of Base (0.5 M KOH)  
 [11:44] Stirrer speed set to 0  
 [11:54] Datapoint id 1 collected  
 [11:54] Stirrer speed set to 50  
 [11:59] pH 2.02 -> 2.22  
 [11:59] Using cautious pH adjust  
 [11:59] Dispensed 0.007596 mL of Base (0.5 M KOH)  
 [12:04] Stepping pH = 2.10  
 [12:04] Dispensed 0.005997 mL of Base (0.5 M KOH)  
 [12:10] Stepping pH = 2.19  
 [12:10] Dispensed 0.001646 mL of Base (0.5 M KOH)  
 [12:15] Stepping pH = 2.22  
 [12:30] Stirrer speed set to 0  
 [12:40] Datapoint id 2 collected

Sample name: **M16\_octanol**  
Assay name: **pH-metric high logP**  
Assay ID: **18C-01009**  
Filename: **C:\Sirius\_T3\Mehtap\20180228\_exp28\_logP\_T3-2\18C-01009\_M16\_octanol\_pH-metric high logP.t3r**

Experiment start time: **3/1/2018 12:08:09 PM**  
Analyst: **Pion**  
Instrument ID: **T312060**

## Experiment Log (continued)

[12:40] Charge balance equation is out by -0.2%  
[12:40] Stirrer speed set to 50  
[12:45] pH 2.23 -> 2.43  
[12:45] Using charge balance adjust  
[12:45] Dispensed 0.009407 mL of Base (0.5 M KOH)  
[13:06] Stirrer speed set to 0  
[13:16] Datapoint id 3 collected  
[13:16] Charge balance equation is out by -6.0%  
[13:16] Stirrer speed set to 50  
[13:21] pH 2.42 -> 2.62  
[13:21] Using charge balance adjust  
[13:21] Dispensed 0.006021 mL of Base (0.5 M KOH)  
[13:41] Stirrer speed set to 0  
[13:51] Datapoint id 4 collected  
[13:51] Charge balance equation is out by -18.1%  
[13:51] Stirrer speed set to 50  
[13:56] pH 2.59 -> 2.79  
[13:56] Using cautious pH adjust  
[13:56] Dispensed 0.002046 mL of Base (0.5 M KOH)  
[14:01] Stepping pH = 2.67  
[14:02] Dispensed 0.001787 mL of Base (0.5 M KOH)  
[14:07] Stepping pH = 2.76  
[14:07] Dispensed 0.000494 mL of Base (0.5 M KOH)  
[14:12] Stepping pH = 2.78  
[14:27] Stirrer speed set to 0  
[14:37] Datapoint id 5 collected  
[14:37] Charge balance equation is out by -5.4%  
[14:37] Stirrer speed set to 50  
[14:42] pH 2.79 -> 2.99  
[14:42] Using charge balance adjust  
[14:42] Dispensed 0.002705 mL of Base (0.5 M KOH)  
[15:02] Stirrer speed set to 0  
[15:12] Datapoint id 6 collected  
[15:12] Charge balance equation is out by -31.5%  
[15:12] Stirrer speed set to 50  
[15:18] pH 2.93 -> 3.13  
[15:18] Using cautious pH adjust  
[15:18] Dispensed 0.001035 mL of Base (0.5 M KOH)  
[15:23] Stepping pH = 2.99  
[15:23] Dispensed 0.001294 mL of Base (0.5 M KOH)  
[15:28] Stepping pH = 3.08  
[15:28] Dispensed 0.000541 mL of Base (0.5 M KOH)  
[15:33] Stepping pH = 3.12  
[15:48] Stirrer speed set to 0  
[15:58] Datapoint id 7 collected  
[15:58] Charge balance equation is out by -39.0%  
[15:58] Stirrer speed set to 50  
[16:03] pH 3.12 -> 3.32  
[16:03] Using cautious pH adjust  
[16:04] Dispensed 0.000753 mL of Base (0.5 M KOH)  
[16:09] Stepping pH = 3.18  
[16:09] Dispensed 0.000917 mL of Base (0.5 M KOH)  
[16:14] Stepping pH = 3.27  
[16:14] Dispensed 0.000423 mL of Base (0.5 M KOH)  
[16:19] Stepping pH = 3.30  
[16:19] Dispensed 0.000165 mL of Base (0.5 M KOH)  
[16:24] Stepping pH = 3.32  
[16:39] Stirrer speed set to 0  
[16:49] Datapoint id 8 collected

Sample name: **M16\_octanol**  
Assay name: **pH-metric high logP**  
Assay ID: **18C-01009**  
Filename: **C:\Sirius\_T3\Mehtap\20180228\_exp28\_logP\_T3-2\18C-01009\_M16\_octanol\_pH-metric high logP.t3r**

Experiment start time: **3/1/2018 12:08:09 PM**  
Analyst: **Pion**  
Instrument ID: **T312060**

## Experiment Log (continued)

[16:49] Charge balance equation is out by -50.3%  
[16:49] Stirrer speed set to 50  
[16:55] pH 3.32 -> 3.52  
[16:55] Using cautious pH adjust  
[16:55] Dispensed 0.000611 mL of Base (0.5 M KOH)  
[17:00] Stepping pH = 3.37  
[17:00] Dispensed 0.000823 mL of Base (0.5 M KOH)  
[17:05] Stepping pH = 3.45  
[17:05] Dispensed 0.000541 mL of Base (0.5 M KOH)  
[17:10] Stepping pH = 3.49  
[17:10] Dispensed 0.000235 mL of Base (0.5 M KOH)  
[17:15] Stepping pH = 3.51  
[17:30] Stirrer speed set to 0  
[17:40] Datapoint id 9 collected  
[17:40] Charge balance equation is out by -79.1%  
[17:40] Stirrer speed set to 50  
[17:45] pH 3.51 -> 3.71  
[17:45] Using cautious pH adjust  
[17:46] Dispensed 0.000588 mL of Base (0.5 M KOH)  
[17:51] Stepping pH = 3.56  
[17:51] Dispensed 0.000800 mL of Base (0.5 M KOH)  
[17:56] Stepping pH = 3.63  
[17:56] Dispensed 0.000635 mL of Base (0.5 M KOH)  
[18:01] Stepping pH = 3.69  
[18:01] Dispensed 0.000118 mL of Base (0.5 M KOH)  
[18:06] Stepping pH = 3.70  
[18:21] Stirrer speed set to 0  
[18:31] Datapoint id 10 collected  
[18:31] Charge balance equation is out by -81.1%  
[18:31] Stirrer speed set to 50  
[18:37] pH 3.70 -> 3.90  
[18:37] Using cautious pH adjust  
[18:37] Dispensed 0.000635 mL of Base (0.5 M KOH)  
[18:42] Stepping pH = 3.77  
[18:42] Dispensed 0.000729 mL of Base (0.5 M KOH)  
[18:47] Stepping pH = 3.86  
[18:47] Dispensed 0.000259 mL of Base (0.5 M KOH)  
[18:52] Stepping pH = 3.89  
[18:52] Dispensed 0.000094 mL of Base (0.5 M KOH)  
[18:57] Stepping pH = 3.89  
[19:12] Stirrer speed set to 0  
[19:22] Datapoint id 11 collected  
[19:22] Charge balance equation is out by -36.1%  
[19:22] Stirrer speed set to 50  
[19:27] pH 3.89 -> 4.09  
[19:27] Using cautious pH adjust  
[19:28] Dispensed 0.000753 mL of Base (0.5 M KOH)  
[19:33] Stepping pH = 4.04  
[19:33] Dispensed 0.000282 mL of Base (0.5 M KOH)  
[19:38] Stepping pH = 4.08  
[19:38] Dispensed 0.000071 mL of Base (0.5 M KOH)  
[19:43] Stepping pH = 4.08  
[19:43] Dispensed 0.000141 mL of Base (0.5 M KOH)  
[19:48] Stepping pH = 4.11  
[20:03] Stirrer speed set to 0  
[20:13] Datapoint id 12 collected  
[20:13] Charge balance equation is out by 17.6%  
[20:13] Stirrer speed set to 50  
[20:18] pH 4.11 -> 4.31

Sample name: **M16\_octanol**  
Assay name: **pH-metric high logP**  
Assay ID: **18C-01009**  
Filename: **C:\Sirius\_T3\Mehtap\20180228\_exp28\_logP\_T3-2\18C-01009\_M16\_octanol\_pH-metric high logP.t3r**

Experiment start time: **3/1/2018 12:08:09 PM**  
Analyst: **Pion**  
Instrument ID: **T312060**

## Experiment Log (continued)

[20:18] Using cautious pH adjust  
[20:18] Dispensed 0.000894 mL of Base (0.5 M KOH)  
[20:24] Stepping pH = 4.40  
[20:39] Stirrer speed set to 0  
[20:49] Datapoint id 13 collected  
[20:49] Charge balance equation is out by 50.0%  
[20:49] Stirrer speed set to 50  
[20:54] pH 4.39 -> 4.59  
[20:54] Using cautious pH adjust  
[20:54] Dispensed 0.001011 mL of Base (0.5 M KOH)  
[21:00] Stepping pH = 5.11  
[21:15] Stirrer speed set to 0  
[21:28] Datapoint id 14 collected  
[21:28] Charge balance equation is out by 50.0%  
[21:28] Stirrer speed set to 50  
[21:33] pH 5.12 -> 5.32  
[21:33] Using cautious pH adjust  
[21:33] Dispensed 0.000611 mL of Base (0.5 M KOH)  
[21:38] Stepping pH = 8.25  
[21:53] Stirrer speed set to 0  
[22:28] Datapoint id 15 collected  
[22:28] Charge balance equation is out by 50.0%  
[22:28] Stirrer speed set to 50  
[22:33] pH 8.53 -> 8.73  
[22:33] Using cautious pH adjust  
[22:33] Dispensed 0.000588 mL of Base (0.5 M KOH)  
[22:38] Stepping pH = 9.19  
[22:53] Stirrer speed set to 0  
[23:03] Datapoint id 16 collected  
[23:03] Charge balance equation is out by 50.0%  
[23:03] Stirrer speed set to 50  
[23:08] pH 9.18 -> 9.38  
[23:08] Using cautious pH adjust  
[23:08] Dispensed 0.001011 mL of Base (0.5 M KOH)  
[23:13] Stepping pH = 9.60  
[23:28] Stirrer speed set to 0  
[23:38] Datapoint id 17 collected  
[23:38] Charge balance equation is out by 50.0%  
[23:38] Stirrer speed set to 50  
[23:44] pH 9.59 -> 9.79  
[23:44] Using cautious pH adjust  
[23:44] Dispensed 0.000847 mL of Base (0.5 M KOH)  
[23:49] Stepping pH = 9.79  
[24:04] Stirrer speed set to 0  
[24:14] Datapoint id 18 collected  
[24:14] Charge balance equation is out by 50.0%  
[24:14] Stirrer speed set to 50  
[24:19] pH 9.78 -> 9.98  
[24:19] Using cautious pH adjust  
[24:19] Dispensed 0.000729 mL of Base (0.5 M KOH)  
[24:24] Stepping pH = 9.91  
[24:24] Dispensed 0.000282 mL of Base (0.5 M KOH)  
[24:29] Stepping pH = 9.94  
[24:30] Dispensed 0.000282 mL of Base (0.5 M KOH)  
[24:35] Stepping pH = 9.98  
[24:50] Stirrer speed set to 0  
[25:00] Datapoint id 19 collected  
[25:00] Charge balance equation is out by 10.9%  
[25:00] Stirrer speed set to 50



Sample name: **M16\_octanol**  
Assay name: **pH-metric high logP**  
Assay ID: **18C-01009**  
Filename: **C:\Sirius\_T3\Mehtap\20180228\_exp28\_logP\_T3-2\18C-01009\_M16\_octanol\_pH-metric high logP.t3r**

Experiment start time: **3/1/2018 12:08:09 PM**  
Analyst: **Pion**  
Instrument ID: **T312060**

## Experiment Log (continued)

[25:05] pH 9.98 -> 10.18  
[25:05] Using charge balance adjust  
[25:05] Dispensed 0.001199 mL of Base (0.5 M KOH)  
[25:26] Stirrer speed set to 0  
[25:36] Datapoint id 20 collected  
[25:36] Charge balance equation is out by -11.3%  
[25:36] Stirrer speed set to 50  
[25:41] pH 10.16 -> 10.36  
[25:41] Using charge balance adjust  
[25:41] Dispensed 0.001082 mL of Base (0.5 M KOH)  
[26:01] Stirrer speed set to 0  
[26:11] Datapoint id 21 collected  
[26:11] Charge balance equation is out by -32.3%  
[26:11] Stirrer speed set to 50  
[26:16] pH 10.29 -> 10.49  
[26:16] Using cautious pH adjust  
[26:16] Dispensed 0.000517 mL of Base (0.5 M KOH)  
[26:21] Stepping pH = 10.36  
[26:21] Dispensed 0.000611 mL of Base (0.5 M KOH)  
[26:27] Stepping pH = 10.43  
[26:27] Dispensed 0.000353 mL of Base (0.5 M KOH)  
[26:32] Stepping pH = 10.47  
[26:32] Dispensed 0.000165 mL of Base (0.5 M KOH)  
[26:37] Stepping pH = 10.49  
[26:52] Stirrer speed set to 0  
[27:02] Datapoint id 22 collected  
[27:02] Charge balance equation is out by -58.4%  
[27:02] Stirrer speed set to 50  
[27:07] pH 10.48 -> 10.68  
[27:07] Using cautious pH adjust  
[27:07] Dispensed 0.000588 mL of Base (0.5 M KOH)  
[27:12] Stepping pH = 10.55  
[27:12] Dispensed 0.000682 mL of Base (0.5 M KOH)  
[27:18] Stepping pH = 10.61  
[27:18] Dispensed 0.000494 mL of Base (0.5 M KOH)  
[27:23] Stepping pH = 10.66  
[27:23] Dispensed 0.000188 mL of Base (0.5 M KOH)  
[27:28] Stepping pH = 10.68  
[27:43] Stirrer speed set to 0  
[27:53] Datapoint id 23 collected  
[27:53] Charge balance equation is out by -67.1%  
[27:53] Stirrer speed set to 50  
[27:58] pH 10.67 -> 10.87  
[27:58] Using cautious pH adjust  
[27:58] Dispensed 0.000729 mL of Base (0.5 M KOH)  
[28:03] Stepping pH = 10.73  
[28:03] Dispensed 0.000964 mL of Base (0.5 M KOH)  
[28:08] Stepping pH = 10.80  
[28:09] Dispensed 0.000706 mL of Base (0.5 M KOH)  
[28:14] Stepping pH = 10.84  
[28:14] Dispensed 0.000306 mL of Base (0.5 M KOH)  
[28:19] Stepping pH = 10.86  
[28:34] Stirrer speed set to 0  
[28:45] Datapoint id 24 collected  
[28:45] Charge balance equation is out by -85.3%  
[28:45] Stirrer speed set to 50  
[28:50] pH 10.85 -> 11.05  
[28:50] Using cautious pH adjust  
[28:50] Dispensed 0.001011 mL of Base (0.5 M KOH)

Sample name: **M16\_octanol**  
Assay name: **pH-metric high logP**  
Assay ID: **18C-01009**  
Filename: **C:\Sirius\_T3\Mehtap\20180228\_exp28\_logP\_T3-2\18C-01009\_M16\_octanol\_pH-metric high logP.t3r**

Experiment start time: **3/1/2018 12:08:09 PM**  
Analyst: **Pion**  
Instrument ID: **T312060**

## Experiment Log (continued)

[28:55] Stepping pH = 10.91  
[28:55] Dispensed 0.001270 mL of Base (0.5 M KOH)  
[29:00] Stepping pH = 11.00  
[29:00] Dispensed 0.000682 mL of Base (0.5 M KOH)  
[29:05] Stepping pH = 11.04  
[29:05] Dispensed 0.000165 mL of Base (0.5 M KOH)  
[29:11] Stepping pH = 11.05  
[29:26] Stirrer speed set to 0  
[29:36] Datapoint id 25 collected  
[29:36] Charge balance equation is out by -55.8%  
[29:36] Stirrer speed set to 50  
[29:41] pH 11.04 -> 11.24  
[29:41] Using cautious pH adjust  
[29:41] Dispensed 0.001505 mL of Base (0.5 M KOH)  
[29:46] Stepping pH = 11.13  
[29:46] Dispensed 0.001364 mL of Base (0.5 M KOH)  
[29:51] Stepping pH = 11.21  
[29:51] Dispensed 0.000541 mL of Base (0.5 M KOH)  
[29:56] Stepping pH = 11.23  
[30:11] Stirrer speed set to 0  
[30:22] Datapoint id 26 collected  
[30:22] Charge balance equation is out by -13.7%  
[30:22] Stirrer speed set to 50  
[30:27] pH 11.23 -> 11.43  
[30:27] Using charge balance adjust  
[30:27] Dispensed 0.004516 mL of Base (0.5 M KOH)  
[30:47] Stirrer speed set to 0  
[30:57] Datapoint id 27 collected  
[30:57] Charge balance equation is out by -16.5%  
[30:57] Stirrer speed set to 50  
[31:02] pH 11.40 -> 11.60  
[31:02] Using cautious pH adjust  
[31:02] Dispensed 0.003340 mL of Base (0.5 M KOH)  
[31:07] Stepping pH = 11.51  
[31:08] Dispensed 0.002187 mL of Base (0.5 M KOH)  
[31:13] Stepping pH = 11.57  
[31:13] Dispensed 0.000847 mL of Base (0.5 M KOH)  
[31:18] Stepping pH = 11.59  
[31:33] Stirrer speed set to 0  
[31:43] Datapoint id 28 collected  
[31:43] Charge balance equation is out by 4.5%  
[31:43] Stirrer speed set to 50  
[31:48] pH 11.59 -> 11.79  
[31:48] Using charge balance adjust  
[31:48] Dispensed 0.010583 mL of Base (0.5 M KOH)  
[32:09] Stirrer speed set to 0  
[32:19] Datapoint id 29 collected  
[32:19] Charge balance equation is out by -12.6%  
[32:19] Stirrer speed set to 50  
[32:24] pH 11.77 -> 11.97  
[32:24] Using charge balance adjust  
[32:24] Dispensed 0.016157 mL of Base (0.5 M KOH)  
[32:44] Stirrer speed set to 0  
[32:55] Datapoint id 30 collected  
[32:55] Charge balance equation is out by -7.8%  
[32:55] Stirrer speed set to 50  
[33:00] pH 11.96 -> 12.05  
[33:00] Using charge balance adjust  
[33:00] Dispensed 0.009737 mL of Base (0.5 M KOH)



Sample name: **M16\_octanol**  
Assay name: **pH-metric high logP**  
Assay ID: **18C-01009**  
Filename: **C:\Sirius\_T3\Mehtap\20180228\_exp28\_logP\_T3-2\18C-01009\_M16\_octanol\_pH-metric high logP.t3r**

Experiment start time: **3/1/2018 12:08:09 PM**  
Analyst: **Pion**  
Instrument ID: **T312060**

## Experiment Log (continued)

[33:20] Stirrer speed set to 0  
[33:30] Datapoint id 31 collected  
[33:30] Charge balance equation is out by -63.2%  
[33:30] Titration 2 of 3  
[33:30] Adding initial titrants  
[33:30] Automatically add 0.10000 mL of Octanol  
[33:33] Dispensed 0.100000 mL of Octanol  
[33:33] Stirrer speed set to 10  
[33:34] Stirrer speed set to 55  
[33:34] Iterative adjust 12.04 -> 2.00  
[33:34] pH 12.04 -> 2.00  
[33:36] Dispensed 0.100000 mL of Acid (0.5 M HCl)  
[33:41] pH 2.31 -> 2.00  
[33:42] Dispensed 0.025141 mL of Acid (0.5 M HCl)  
[33:47] pH 2.02 -> 2.00  
[33:47] Dispensed 0.002281 mL of Acid (0.5 M HCl)  
[34:38] Stirrer speed set to 0  
[34:48] Datapoint id 32 collected  
[34:48] Stirrer speed set to 55  
[34:53] pH 1.98 -> 2.18  
[34:53] Using cautious pH adjust  
[34:53] Dispensed 0.009784 mL of Base (0.5 M KOH)  
[34:58] Stepping pH = 2.06  
[34:58] Dispensed 0.007502 mL of Base (0.5 M KOH)  
[35:03] Stepping pH = 2.15  
[35:04] Dispensed 0.001999 mL of Base (0.5 M KOH)  
[35:09] Stepping pH = 2.18  
[35:24] Stirrer speed set to 0  
[35:34] Datapoint id 33 collected  
[35:34] Charge balance equation is out by 1.4%  
[35:34] Stirrer speed set to 55  
[35:39] pH 2.19 -> 2.39  
[35:39] Using charge balance adjust  
[35:39] Dispensed 0.011994 mL of Base (0.5 M KOH)  
[35:59] Stirrer speed set to 0  
[36:10] Datapoint id 34 collected  
[36:10] Charge balance equation is out by -3.2%  
[36:10] Stirrer speed set to 55  
[36:15] pH 2.39 -> 2.59  
[36:15] Using charge balance adjust  
[36:15] Dispensed 0.007549 mL of Base (0.5 M KOH)  
[36:35] Stirrer speed set to 0  
[36:45] Datapoint id 35 collected  
[36:45] Charge balance equation is out by -9.6%  
[36:45] Stirrer speed set to 55  
[36:50] pH 2.58 -> 2.78  
[36:50] Using charge balance adjust  
[36:50] Dispensed 0.004986 mL of Base (0.5 M KOH)  
[37:11] Stirrer speed set to 0  
[37:21] Datapoint id 36 collected  
[37:21] Charge balance equation is out by -20.0%  
[37:21] Stirrer speed set to 55  
[37:26] pH 2.74 -> 2.94  
[37:26] Using cautious pH adjust  
[37:26] Dispensed 0.001764 mL of Base (0.5 M KOH)  
[37:31] Stepping pH = 2.82  
[37:31] Dispensed 0.001623 mL of Base (0.5 M KOH)  
[37:36] Stepping pH = 2.90  
[37:36] Dispensed 0.000659 mL of Base (0.5 M KOH)

Sample name: **M16\_octanol**  
Assay name: **pH-metric high logP**  
Assay ID: **18C-01009**  
Filename: **C:\Sirius\_T3\Mehtap\20180228\_exp28\_logP\_T3-2\18C-01009\_M16\_octanol\_pH-metric high logP.t3r**

Experiment start time: **3/1/2018 12:08:09 PM**  
Analyst: **Pion**  
Instrument ID: **T312060**

## Experiment Log (continued)

[37:41] Stepping pH = 2.93  
[37:42] Dispensed 0.000212 mL of Base (0.5 M KOH)  
[37:47] Stepping pH = 2.94  
[38:02] Stirrer speed set to 0  
[38:12] Datapoint id 37 collected  
[38:12] Charge balance equation is out by -20.5%  
[38:12] Stirrer speed set to 55  
[38:17] pH 2.94 -> 3.14  
[38:17] Using cautious pH adjust  
[38:17] Dispensed 0.001223 mL of Base (0.5 M KOH)  
[38:22] Stepping pH = 3.00  
[38:22] Dispensed 0.001529 mL of Base (0.5 M KOH)  
[38:27] Stepping pH = 3.08  
[38:27] Dispensed 0.000823 mL of Base (0.5 M KOH)  
[38:33] Stepping pH = 3.13  
[38:33] Dispensed 0.000165 mL of Base (0.5 M KOH)  
[38:38] Stepping pH = 3.14  
[38:53] Stirrer speed set to 0  
[39:03] Datapoint id 38 collected  
[39:03] Charge balance equation is out by -53.0%  
[39:03] Stirrer speed set to 55  
[39:08] pH 3.14 -> 3.34  
[39:08] Using cautious pH adjust  
[39:08] Dispensed 0.000941 mL of Base (0.5 M KOH)  
[39:13] Stepping pH = 3.21  
[39:13] Dispensed 0.001035 mL of Base (0.5 M KOH)  
[39:18] Stepping pH = 3.30  
[39:18] Dispensed 0.000423 mL of Base (0.5 M KOH)  
[39:24] Stepping pH = 3.33  
[39:39] Stirrer speed set to 0  
[39:49] Datapoint id 39 collected  
[39:49] Charge balance equation is out by -27.4%  
[39:49] Stirrer speed set to 55  
[39:54] pH 3.34 -> 3.54  
[39:54] Using cautious pH adjust  
[39:54] Dispensed 0.000823 mL of Base (0.5 M KOH)  
[39:59] Stepping pH = 3.42  
[39:59] Dispensed 0.000753 mL of Base (0.5 M KOH)  
[40:04] Stepping pH = 3.51  
[40:04] Dispensed 0.000235 mL of Base (0.5 M KOH)  
[40:09] Stepping pH = 3.53  
[40:25] Stirrer speed set to 0  
[40:35] Datapoint id 40 collected  
[40:35] Charge balance equation is out by -8.9%  
[40:35] Stirrer speed set to 55  
[40:40] pH 3.53 -> 3.73  
[40:40] Using charge balance adjust  
[40:40] Dispensed 0.001646 mL of Base (0.5 M KOH)  
[41:00] Stirrer speed set to 0  
[41:10] Datapoint id 41 collected  
[41:10] Charge balance equation is out by 16.2%  
[41:10] Stirrer speed set to 55  
[41:15] pH 3.77 -> 3.97  
[41:15] Using cautious pH adjust  
[41:15] Dispensed 0.000917 mL of Base (0.5 M KOH)  
[41:20] Stepping pH = 3.96  
[41:20] Dispensed 0.000047 mL of Base (0.5 M KOH)  
[41:25] Stepping pH = 3.96  
[41:41] Stirrer speed set to 0

Sample name: **M16\_octanol**  
Assay name: **pH-metric high logP**  
Assay ID: **18C-01009**  
Filename: **C:\Sirius\_T3\Mehtap\20180228\_exp28\_logP\_T3-2\18C-01009\_M16\_octanol\_pH-metric high logP.t3r**

Experiment start time: **3/1/2018 12:08:09 PM**  
Analyst: **Pion**  
Instrument ID: **T312060**

## Experiment Log (continued)

[41:51] Datapoint id 42 collected  
[41:51] Charge balance equation is out by 47.0%  
[41:51] Stirrer speed set to 55  
[41:56] pH 3.97 -> 4.17  
[41:56] Using cautious pH adjust  
[41:56] Dispensed 0.001011 mL of Base (0.5 M KOH)  
[42:01] Stepping pH = 4.29  
[42:16] Stirrer speed set to 0  
[42:27] Datapoint id 43 collected  
[42:27] Charge balance equation is out by 50.0%  
[42:27] Stirrer speed set to 55  
[42:32] pH 4.29 -> 4.49  
[42:32] Using cautious pH adjust  
[42:32] Dispensed 0.001011 mL of Base (0.5 M KOH)  
[42:37] Stepping pH = 5.79  
[42:52] Stirrer speed set to 0  
[43:16] Datapoint id 44 collected  
[43:16] Charge balance equation is out by 50.0%  
[43:16] Stirrer speed set to 55  
[43:21] pH 5.84 -> 6.04  
[43:21] Using cautious pH adjust  
[43:21] Dispensed 0.000118 mL of Base (0.5 M KOH)  
[43:26] Stepping pH = 5.94  
[43:26] Dispensed 0.000071 mL of Base (0.5 M KOH)  
[43:31] Stepping pH = 6.18  
[43:46] Stirrer speed set to 0  
[44:20] Datapoint id 45 collected  
[44:20] Charge balance equation is out by 18.2%  
[44:20] Stirrer speed set to 55  
[44:25] pH 6.29 -> 6.49  
[44:25] Using cautious pH adjust  
[44:25] Dispensed 0.000047 mL of Base (0.5 M KOH)  
[44:30] Stepping pH = 6.38  
[44:30] Dispensed 0.000047 mL of Base (0.5 M KOH)  
[44:35] Stepping pH = 6.89  
[44:50] Stirrer speed set to 0  
[45:50] Datapoint id 46 collected  
[45:50] Charge balance equation is out by 7.4%  
[45:50] Stirrer speed set to 55  
[45:55] pH 6.83 -> 7.03  
[45:55] Using charge balance adjust  
[45:55] Dispensed 0.000071 mL of Base (0.5 M KOH)  
[46:15] Stirrer speed set to 0  
[47:15] Datapoint id 47 collected  
[47:15] Charge balance equation is out by 136.7%  
[47:15] Stirrer speed set to 55  
[47:21] pH 7.23 -> 7.43  
[47:21] Using cautious pH adjust  
[47:21] Dispensed 0.000024 mL of Base (0.5 M KOH)  
[47:26] Stepping pH = 7.19  
[47:26] Dispensed 0.000212 mL of Base (0.5 M KOH)  
[47:31] Stepping pH = 8.55  
[47:46] Stirrer speed set to 0  
[48:28] Datapoint id 48 collected  
[48:28] Charge balance equation is out by -241.0%  
[48:28] Stirrer speed set to 55  
[48:33] pH 8.44 -> 8.64  
[48:33] Using cautious pH adjust  
[48:33] Dispensed 0.000329 mL of Base (0.5 M KOH)

Sample name: **M16\_octanol**  
Assay name: **pH-metric high logP**  
Assay ID: **18C-01009**  
Filename: **C:\Sirius\_T3\Mehtap\20180228\_exp28\_logP\_T3-2\18C-01009\_M16\_octanol\_pH-metric high logP.t3r**

Experiment start time: **3/1/2018 12:08:09 PM**  
Analyst: **Pion**  
Instrument ID: **T312060**

## Experiment Log (continued)

[48:38] Stepping pH = 9.15  
[48:53] Stirrer speed set to 0  
[49:09] Datapoint id 49 collected  
[49:09] Charge balance equation is out by 50.0%  
[49:09] Stirrer speed set to 55  
[49:14] pH 9.13 -> 9.33  
[49:14] Using cautious pH adjust  
[49:14] Dispensed 0.000894 mL of Base (0.5 M KOH)  
[49:19] Stepping pH = 9.72  
[49:34] Stirrer speed set to 0  
[49:47] Datapoint id 50 collected  
[49:47] Charge balance equation is out by 50.0%  
[49:47] Stirrer speed set to 55  
[49:52] pH 9.72 -> 9.92  
[49:52] Using cautious pH adjust  
[49:52] Dispensed 0.000988 mL of Base (0.5 M KOH)  
[49:57] Stepping pH = 10.04  
[50:12] Stirrer speed set to 0  
[50:23] Datapoint id 51 collected  
[50:23] Charge balance equation is out by 50.0%  
[50:23] Stirrer speed set to 55  
[50:28] pH 10.04 -> 10.24  
[50:28] Using cautious pH adjust  
[50:28] Dispensed 0.000800 mL of Base (0.5 M KOH)  
[50:33] Stepping pH = 10.22  
[50:33] Dispensed 0.000071 mL of Base (0.5 M KOH)  
[50:38] Stepping pH = 10.23  
[50:38] Dispensed 0.000094 mL of Base (0.5 M KOH)  
[50:43] Stepping pH = 10.24  
[50:58] Stirrer speed set to 0  
[51:08] Datapoint id 52 collected  
[51:08] Charge balance equation is out by 39.5%  
[51:08] Stirrer speed set to 55  
[51:13] pH 10.24 -> 10.44  
[51:13] Using cautious pH adjust  
[51:13] Dispensed 0.000729 mL of Base (0.5 M KOH)  
[51:19] Stepping pH = 10.36  
[51:19] Dispensed 0.000376 mL of Base (0.5 M KOH)  
[51:24] Stepping pH = 10.41  
[51:24] Dispensed 0.000165 mL of Base (0.5 M KOH)  
[51:29] Stepping pH = 10.43  
[51:29] Dispensed 0.000071 mL of Base (0.5 M KOH)  
[51:34] Stepping pH = 10.43  
[51:49] Stirrer speed set to 0  
[52:00] Datapoint id 53 collected  
[52:00] Charge balance equation is out by 9.5%  
[52:00] Stirrer speed set to 55  
[52:05] pH 10.42 -> 10.62  
[52:05] Using charge balance adjust  
[52:05] Dispensed 0.001482 mL of Base (0.5 M KOH)  
[52:25] Stirrer speed set to 0  
[52:35] Datapoint id 54 collected  
[52:35] Charge balance equation is out by -24.8%  
[52:35] Stirrer speed set to 55  
[52:40] pH 10.58 -> 10.78  
[52:40] Using cautious pH adjust  
[52:40] Dispensed 0.000823 mL of Base (0.5 M KOH)  
[52:45] Stepping pH = 10.64  
[52:46] Dispensed 0.001011 mL of Base (0.5 M KOH)

Sample name: **M16\_octanol**  
Assay name: **pH-metric high logP**  
Assay ID: **18C-01009**  
Filename: **C:\Sirius\_T3\Mehtap\20180228\_exp28\_logP\_T3-2\18C-01009\_M16\_octanol\_pH-metric high logP.t3r**

Experiment start time: **3/1/2018 12:08:09 PM**  
Analyst: **Pion**  
Instrument ID: **T312060**

## Experiment Log (continued)

[52:51] Stepping pH = 10.71  
[52:51] Dispensed 0.000682 mL of Base (0.5 M KOH)  
[52:56] Stepping pH = 10.76  
[52:56] Dispensed 0.000259 mL of Base (0.5 M KOH)  
[53:01] Stepping pH = 10.77  
[53:16] Stirrer speed set to 0  
[53:26] Datapoint id 55 collected  
[53:26] Charge balance equation is out by -67.6%  
[53:26] Stirrer speed set to 55  
[53:31] pH 10.77 -> 10.97  
[53:31] Using cautious pH adjust  
[53:32] Dispensed 0.001058 mL of Base (0.5 M KOH)  
[53:37] Stepping pH = 10.84  
[53:37] Dispensed 0.001223 mL of Base (0.5 M KOH)  
[53:42] Stepping pH = 10.91  
[53:42] Dispensed 0.000682 mL of Base (0.5 M KOH)  
[53:47] Stepping pH = 10.96  
[53:47] Dispensed 0.000165 mL of Base (0.5 M KOH)  
[53:52] Stepping pH = 10.96  
[54:07] Stirrer speed set to 0  
[54:17] Datapoint id 56 collected  
[54:17] Charge balance equation is out by -47.4%  
[54:17] Stirrer speed set to 55  
[54:22] pH 10.96 -> 11.16  
[54:22] Using cautious pH adjust  
[54:23] Dispensed 0.001482 mL of Base (0.5 M KOH)  
[54:28] Stepping pH = 11.04  
[54:28] Dispensed 0.001458 mL of Base (0.5 M KOH)  
[54:33] Stepping pH = 11.11  
[54:33] Dispensed 0.000847 mL of Base (0.5 M KOH)  
[54:38] Stepping pH = 11.14  
[54:38] Dispensed 0.000329 mL of Base (0.5 M KOH)  
[54:43] Stepping pH = 11.15  
[54:58] Stirrer speed set to 0  
[55:08] Datapoint id 57 collected  
[55:08] Charge balance equation is out by -38.3%  
[55:08] Stirrer speed set to 55  
[55:14] pH 11.15 -> 11.35  
[55:14] Using cautious pH adjust  
[55:14] Dispensed 0.002234 mL of Base (0.5 M KOH)  
[55:19] Stepping pH = 11.23  
[55:19] Dispensed 0.002258 mL of Base (0.5 M KOH)  
[55:24] Stepping pH = 11.31  
[55:24] Dispensed 0.001058 mL of Base (0.5 M KOH)  
[55:29] Stepping pH = 11.34  
[55:44] Stirrer speed set to 0  
[55:54] Datapoint id 58 collected  
[55:54] Charge balance equation is out by -24.3%  
[55:54] Stirrer speed set to 55  
[55:59] pH 11.34 -> 11.54  
[55:59] Using cautious pH adjust  
[56:00] Dispensed 0.003434 mL of Base (0.5 M KOH)  
[56:05] Stepping pH = 11.44  
[56:05] Dispensed 0.002775 mL of Base (0.5 M KOH)  
[56:10] Stepping pH = 11.50  
[56:10] Dispensed 0.001364 mL of Base (0.5 M KOH)  
[56:15] Stepping pH = 11.53  
[56:30] Stirrer speed set to 0  
[56:40] Datapoint id 59 collected

Sample name: **M16\_octanol**  
Assay name: **pH-metric high logP**  
Assay ID: **18C-01009**  
Filename: **C:\Sirius\_T3\Mehtap\20180228\_exp28\_logP\_T3-2\18C-01009\_M16\_octanol\_pH-metric high logP.t3r**

Experiment start time: **3/1/2018 12:08:09 PM**  
Analyst: **Pion**  
Instrument ID: **T312060**

## Experiment Log (continued)

[56:40] Charge balance equation is out by -10.4%  
[56:40] Stirrer speed set to 55  
[56:45] pH 11.54 -> 11.74  
[56:45] Using charge balance adjust  
[56:46] Dispensed 0.010748 mL of Base (0.5 M KOH)  
[57:06] Stirrer speed set to 0  
[57:16] Datapoint id 60 collected  
[57:16] Charge balance equation is out by -12.6%  
[57:16] Stirrer speed set to 55  
[57:21] pH 11.71 -> 11.91  
[57:21] Using charge balance adjust  
[57:22] Dispensed 0.016345 mL of Base (0.5 M KOH)  
[57:42] Stirrer speed set to 0  
[57:52] Datapoint id 61 collected  
[57:52] Charge balance equation is out by -9.7%  
[57:52] Stirrer speed set to 55  
[57:57] pH 11.90 -> 12.05  
[57:57] Using charge balance adjust  
[57:58] Dispensed 0.018156 mL of Base (0.5 M KOH)  
[58:18] Stirrer speed set to 0  
[58:28] Datapoint id 62 collected  
[58:28] Charge balance equation is out by -33.1%  
[58:28] Titration 3 of 3  
[58:28] Adding initial titrants  
[58:28] Automatically add 0.30000 mL of Octanol  
[58:35] Dispensed 0.300000 mL of Octanol  
[58:35] Stirrer speed set to 10  
[58:36] Stirrer speed set to 60  
[58:36] Iterative adjust 12.04 -> 2.00  
[58:36] pH 12.04 -> 2.00  
[58:38] Dispensed 0.100000 mL of Acid (0.5 M HCl)  
[58:44] pH 2.47 -> 2.00  
[58:45] Dispensed 0.037465 mL of Acid (0.5 M HCl)  
[58:50] pH 2.03 -> 2.00  
[58:50] Dispensed 0.003904 mL of Acid (0.5 M HCl)  
[59:40] Stirrer speed set to 0  
[59:50] Datapoint id 63 collected  
[59:50] Stirrer speed set to 60  
[59:55] pH 1.98 -> 2.18  
[59:55] Using cautious pH adjust  
[59:56] Dispensed 0.011265 mL of Base (0.5 M KOH)  
[1:00:01] Stepping pH = 2.06  
[1:00:01] Dispensed 0.008796 mL of Base (0.5 M KOH)  
[1:00:06] Stepping pH = 2.15  
[1:00:06] Dispensed 0.001881 mL of Base (0.5 M KOH)  
[1:00:11] Stepping pH = 2.18  
[1:00:26] Stirrer speed set to 0  
[1:00:47] Datapoint id 64 collected  
[1:00:47] Charge balance equation is out by 2.6%  
[1:00:47] Stirrer speed set to 60  
[1:00:52] pH 2.19 -> 2.39  
[1:00:52] Using charge balance adjust  
[1:00:52] Dispensed 0.013805 mL of Base (0.5 M KOH)  
[1:01:12] Stirrer speed set to 0  
[1:01:22] Datapoint id 65 collected  
[1:01:22] Charge balance equation is out by -4.3%  
[1:01:22] Stirrer speed set to 60  
[1:01:27] pH 2.39 -> 2.59  
[1:01:27] Using charge balance adjust



Sample name: **M16\_octanol**  
Assay name: **pH-metric high logP**  
Assay ID: **18C-01009**  
Filename: **C:\Sirius\_T3\Mehtap\20180228\_exp28\_logP\_T3-2\18C-01009\_M16\_octanol\_pH-metric high logP.t3r**

Experiment start time: **3/1/2018 12:08:09 PM**  
Analyst: **Pion**  
Instrument ID: **T312060**

## Experiment Log (continued)

[1:01:28] Dispensed 0.008866 mL of Base (0.5 M KOH)  
[1:01:48] Stirrer speed set to 0  
[1:01:58] Datapoint id 66 collected  
[1:01:58] Charge balance equation is out by -13.7%  
[1:01:58] Stirrer speed set to 60  
[1:02:03] pH 2.57 -> 2.77  
[1:02:03] Using charge balance adjust  
[1:02:03] Dispensed 0.006021 mL of Base (0.5 M KOH)  
[1:02:23] Stirrer speed set to 0  
[1:02:34] Datapoint id 67 collected  
[1:02:34] Charge balance equation is out by -21.7%  
[1:02:34] Stirrer speed set to 60  
[1:02:39] pH 2.73 -> 2.93  
[1:02:39] Using cautious pH adjust  
[1:02:39] Dispensed 0.002187 mL of Base (0.5 M KOH)  
[1:02:44] Stepping pH = 2.82  
[1:02:44] Dispensed 0.001834 mL of Base (0.5 M KOH)  
[1:02:49] Stepping pH = 2.89  
[1:02:49] Dispensed 0.000753 mL of Base (0.5 M KOH)  
[1:02:54] Stepping pH = 2.92  
[1:03:09] Stirrer speed set to 0  
[1:03:27] Datapoint id 68 collected  
[1:03:27] Charge balance equation is out by -9.5%  
[1:03:27] Stirrer speed set to 60  
[1:03:33] pH 2.93 -> 3.13  
[1:03:33] Using charge balance adjust  
[1:03:33] Dispensed 0.003175 mL of Base (0.5 M KOH)  
[1:03:53] Stirrer speed set to 0  
[1:04:03] Datapoint id 69 collected  
[1:04:03] Charge balance equation is out by -12.8%  
[1:04:03] Stirrer speed set to 60  
[1:04:09] pH 3.11 -> 3.31  
[1:04:09] Using charge balance adjust  
[1:04:09] Dispensed 0.002587 mL of Base (0.5 M KOH)  
[1:04:29] Stirrer speed set to 0  
[1:04:40] Datapoint id 70 collected  
[1:04:40] Charge balance equation is out by 10.9%  
[1:04:40] Stirrer speed set to 60  
[1:04:45] pH 3.34 -> 3.54  
[1:04:45] Using charge balance adjust  
[1:04:45] Dispensed 0.002305 mL of Base (0.5 M KOH)  
[1:05:05] Stirrer speed set to 0  
[1:05:15] Datapoint id 71 collected  
[1:05:15] Charge balance equation is out by 48.3%  
[1:05:15] Stirrer speed set to 60  
[1:05:20] pH 3.64 -> 3.84  
[1:05:20] Using cautious pH adjust  
[1:05:20] Dispensed 0.001152 mL of Base (0.5 M KOH)  
[1:05:25] Stepping pH = 3.89  
[1:05:40] Stirrer speed set to 0  
[1:05:51] Datapoint id 72 collected  
[1:05:51] Charge balance equation is out by 50.0%  
[1:05:51] Stirrer speed set to 60  
[1:05:56] pH 3.89 -> 4.09  
[1:05:56] Using cautious pH adjust  
[1:05:56] Dispensed 0.001105 mL of Base (0.5 M KOH)  
[1:06:01] Stepping pH = 4.44  
[1:06:16] Stirrer speed set to 0  
[1:06:26] Datapoint id 73 collected

Sample name: **M16\_octanol**  
Assay name: **pH-metric high logP**  
Assay ID: **18C-01009**  
Filename: **C:\Sirius\_T3\Mehtap\20180228\_exp28\_logP\_T3-2\18C-01009\_M16\_octanol\_pH-metric high logP.t3r**

Experiment start time: **3/1/2018 12:08:09 PM**  
Analyst: **Pion**  
Instrument ID: **T312060**

## Experiment Log (continued)

[1:06:26] Charge balance equation is out by 50.0%  
[1:06:26] Stirrer speed set to 60  
[1:06:32] pH 4.44 -> 4.64  
[1:06:32] Using cautious pH adjust  
[1:06:32] Dispensed 0.000706 mL of Base (0.5 M KOH)  
[1:06:37] Stepping pH = 6.57  
[1:06:52] Stirrer speed set to 0  
[1:07:47] Datapoint id 74 collected  
[1:07:47] Charge balance equation is out by 50.0%  
[1:07:47] Stirrer speed set to 60  
[1:07:53] pH 6.31 -> 6.51  
[1:07:53] Using cautious pH adjust  
[1:07:53] Dispensed 0.000047 mL of Base (0.5 M KOH)  
[1:07:58] Stepping pH = 6.28  
[1:07:58] Dispensed 0.000235 mL of Base (0.5 M KOH)  
[1:08:03] Stepping pH = 8.21  
[1:08:18] Stirrer speed set to 0  
[1:09:18] Datapoint id 75 collected  
[1:09:18] Charge balance equation is out by -228.6%  
[1:09:18] Stirrer speed set to 60  
[1:09:23] pH 7.81 -> 8.01  
[1:09:23] Using cautious pH adjust  
[1:09:23] Dispensed 0.000047 mL of Base (0.5 M KOH)  
[1:09:28] Stepping pH = 7.85  
[1:09:28] Dispensed 0.000094 mL of Base (0.5 M KOH)  
[1:09:33] Stepping pH = 8.33  
[1:09:48] Stirrer speed set to 0  
[1:10:33] Datapoint id 76 collected  
[1:10:33] Charge balance equation is out by -40.8%  
[1:10:33] Stirrer speed set to 60  
[1:10:38] pH 8.20 -> 8.40  
[1:10:38] Using cautious pH adjust  
[1:10:38] Dispensed 0.000118 mL of Base (0.5 M KOH)  
[1:10:43] Stepping pH = 8.56  
[1:10:58] Stirrer speed set to 0  
[1:11:21] Datapoint id 77 collected  
[1:11:21] Charge balance equation is out by 50.0%  
[1:11:21] Stirrer speed set to 60  
[1:11:26] pH 8.49 -> 8.69  
[1:11:26] Using cautious pH adjust  
[1:11:26] Dispensed 0.000188 mL of Base (0.5 M KOH)  
[1:11:31] Stepping pH = 8.91  
[1:11:46] Stirrer speed set to 0  
[1:11:58] Datapoint id 78 collected  
[1:11:58] Charge balance equation is out by 50.0%  
[1:11:58] Stirrer speed set to 60  
[1:12:03] pH 8.87 -> 9.07  
[1:12:03] Using cautious pH adjust  
[1:12:03] Dispensed 0.000400 mL of Base (0.5 M KOH)  
[1:12:09] Stepping pH = 9.33  
[1:12:24] Stirrer speed set to 0  
[1:12:35] Datapoint id 79 collected  
[1:12:35] Charge balance equation is out by 50.0%  
[1:12:35] Stirrer speed set to 60  
[1:12:40] pH 9.30 -> 9.50  
[1:12:40] Using cautious pH adjust  
[1:12:40] Dispensed 0.000800 mL of Base (0.5 M KOH)  
[1:12:45] Stepping pH = 9.79  
[1:13:00] Stirrer speed set to 0



Sample name: **M16\_octanol**  
 Assay name: **pH-metric high logP**  
 Assay ID: **18C-01009**  
 Filename: **C:\Sirius\_T3\Mehtap\20180228\_exp28\_logP\_T3-2\18C-01009\_M16\_octanol\_pH-metric high logP.t3r**

Experiment start time: **3/1/2018 12:08:09 PM**  
 Analyst: **Pion**  
 Instrument ID: **T312060**

## Experiment Log (continued)

[1:13:10] Datapoint id 80 collected  
 [1:13:10] Charge balance equation is out by 50.0%  
 [1:13:10] Stirrer speed set to 60  
 [1:13:15] pH 9.77 -> 9.97  
 [1:13:15] Using cautious pH adjust  
 [1:13:15] Dispensed 0.001105 mL of Base (0.5 M KOH)  
 [1:13:20] Stepping pH = 10.15  
 [1:13:36] Stirrer speed set to 0  
 [1:13:46] Datapoint id 81 collected  
 [1:13:46] Charge balance equation is out by 50.0%  
 [1:13:46] Stirrer speed set to 60  
 [1:13:51] pH 10.14 -> 10.34  
 [1:13:51] Using cautious pH adjust  
 [1:13:51] Dispensed 0.001082 mL of Base (0.5 M KOH)  
 [1:13:56] Stepping pH = 10.37  
 [1:14:11] Stirrer speed set to 0  
 [1:14:21] Datapoint id 82 collected  
 [1:14:21] Charge balance equation is out by 50.0%  
 [1:14:21] Stirrer speed set to 60  
 [1:14:26] pH 10.36 -> 10.56  
 [1:14:26] Using cautious pH adjust  
 [1:14:26] Dispensed 0.001058 mL of Base (0.5 M KOH)  
 [1:14:31] Stepping pH = 10.51  
 [1:14:31] Dispensed 0.000306 mL of Base (0.5 M KOH)  
 [1:14:37] Stepping pH = 10.55  
 [1:14:37] Dispensed 0.000118 mL of Base (0.5 M KOH)  
 [1:14:42] Stepping pH = 10.55  
 [1:14:57] Stirrer speed set to 0  
 [1:15:07] Datapoint id 83 collected  
 [1:15:07] Charge balance equation is out by 29.7%  
 [1:15:07] Stirrer speed set to 60  
 [1:15:12] pH 10.55 -> 10.75  
 [1:15:12] Using cautious pH adjust  
 [1:15:12] Dispensed 0.001105 mL of Base (0.5 M KOH)  
 [1:15:17] Stepping pH = 10.66  
 [1:15:17] Dispensed 0.000682 mL of Base (0.5 M KOH)  
 [1:15:22] Stepping pH = 10.71  
 [1:15:22] Dispensed 0.000329 mL of Base (0.5 M KOH)  
 [1:15:27] Stepping pH = 10.73  
 [1:15:28] Dispensed 0.000188 mL of Base (0.5 M KOH)  
 [1:15:33] Stepping pH = 10.74  
 [1:15:48] Stirrer speed set to 0  
 [1:15:58] Datapoint id 84 collected  
 [1:15:58] Charge balance equation is out by -4.8%  
 [1:15:58] Stirrer speed set to 60  
 [1:16:03] pH 10.74 -> 10.94  
 [1:16:03] Using charge balance adjust  
 [1:16:03] Dispensed 0.002611 mL of Base (0.5 M KOH)  
 [1:16:23] Stirrer speed set to 0  
 [1:16:33] Datapoint id 85 collected  
 [1:16:33] Charge balance equation is out by -12.8%  
 [1:16:33] Stirrer speed set to 60  
 [1:16:38] pH 10.92 -> 11.12  
 [1:16:38] Using charge balance adjust  
 [1:16:39] Dispensed 0.003387 mL of Base (0.5 M KOH)  
 [1:16:59] Stirrer speed set to 0  
 [1:17:09] Datapoint id 86 collected  
 [1:17:09] Charge balance equation is out by -11.7%  
 [1:17:09] Stirrer speed set to 60

Sample name: **M16\_octanol**  
Assay name: **pH-metric high logP**  
Assay ID: **18C-01009**  
Filename: **C:\Sirius\_T3\Mehtap\20180228\_exp28\_logP\_T3-2\18C-01009\_M16\_octanol\_pH-metric high logP.t3r**

Experiment start time: **3/1/2018 12:08:09 PM**  
Analyst: **Pion**  
Instrument ID: **T312060**

## Experiment Log (continued)

[1:17:14] pH 11.10 -> 11.30  
[1:17:14] Using charge balance adjust  
[1:17:14] Dispensed 0.004751 mL of Base (0.5 M KOH)  
[1:17:34] Stirrer speed set to 0  
[1:17:44] Datapoint id 87 collected  
[1:17:44] Charge balance equation is out by -27.1%  
[1:17:44] Stirrer speed set to 60  
[1:17:50] pH 11.25 -> 11.45  
[1:17:50] Using cautious pH adjust  
[1:17:50] Dispensed 0.003269 mL of Base (0.5 M KOH)  
[1:17:55] Stepping pH = 11.34  
[1:17:55] Dispensed 0.002893 mL of Base (0.5 M KOH)  
[1:18:00] Stepping pH = 11.41  
[1:18:00] Dispensed 0.001364 mL of Base (0.5 M KOH)  
[1:18:05] Stepping pH = 11.44  
[1:18:05] Dispensed 0.000470 mL of Base (0.5 M KOH)  
[1:18:10] Stepping pH = 11.45  
[1:18:26] Stirrer speed set to 0  
[1:18:36] Datapoint id 88 collected  
[1:18:36] Charge balance equation is out by -22.0%  
[1:18:36] Stirrer speed set to 60  
[1:18:41] pH 11.45 -> 11.65  
[1:18:41] Using cautious pH adjust  
[1:18:41] Dispensed 0.005103 mL of Base (0.5 M KOH)  
[1:18:46] Stepping pH = 11.54  
[1:18:46] Dispensed 0.004163 mL of Base (0.5 M KOH)  
[1:18:51] Stepping pH = 11.61  
[1:18:51] Dispensed 0.002023 mL of Base (0.5 M KOH)  
[1:18:57] Stepping pH = 11.64  
[1:19:12] Stirrer speed set to 0  
[1:19:34] Datapoint id 89 collected  
[1:19:34] Charge balance equation is out by -10.3%  
[1:19:34] Stirrer speed set to 60  
[1:19:39] pH 11.64 -> 11.84  
[1:19:39] Using charge balance adjust  
[1:19:40] Dispensed 0.015851 mL of Base (0.5 M KOH)  
[1:20:00] Stirrer speed set to 0  
[1:20:10] Datapoint id 90 collected  
[1:20:10] Charge balance equation is out by -12.5%  
[1:20:10] Stirrer speed set to 60  
[1:20:15] pH 11.82 -> 12.02  
[1:20:15] Using charge balance adjust  
[1:20:16] Dispensed 0.024506 mL of Base (0.5 M KOH)  
[1:20:36] Stirrer speed set to 0  
[1:20:46] Datapoint id 91 collected  
[1:20:46] Charge balance equation is out by -12.2%  
[1:20:46] Stirrer speed set to 60  
[1:20:51] pH 12.01 -> 12.05  
[1:20:51] Using charge balance adjust  
[1:20:51] Dispensed 0.007103 mL of Base (0.5 M KOH)  
[1:21:12] Stirrer speed set to 0  
[1:21:22] Datapoint id 92 collected  
[1:21:22] Charge balance equation is out by -85.4%  
[1:21:22] Argon flow rate set to 0  
[1:21:26] Titrator arm moved over Titration position
