# Supplementary material for: Octanol-water partition coefficient measurements for the SAMPL6 Blind Prediction Challenge
Source: bioRxiv or medRxiv preprint supplement (doi:10.1101/757393), 2019-12-02
Supplement: Supplementary file [file media-2.zip]

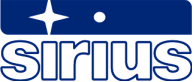

Sample name: **M11\_octanol** Experiment start time: **3/9/2018 4:01:24 PM**  
Assay name: **pH-metric high logP** Analyst: **Pion**  
Assay ID: **18C-09010** Instrument ID: **T312060**  
Filename: **C:\Sirius\_T3\Mehtap\20180309\_exp31\_logP\_T3-2\18C-09010\_M11\_octanol\_pH-metric high logP.t3r**

## pH-metric Result

logP (XH +) -0.33 ±0.82 (n=50)  
logP (neutral X) 2.12 ±0.01 (n=50)  
RMSD 0.537

### 18C-09010 Points 1 to 24

M11\_octanol concentration factor 0.962  
Carbonate 0.0600 mM  
Acidity error -0.46392 mM

### 18C-09010 Points 25 to 45

M11\_octanol concentration factor 0.930  
Carbonate 0.0890 mM  
Acidity error -0.75734 mM

### 18C-09010 Points 46 to 69

M11\_octanol concentration factor 0.907  
Carbonate 0.1290 mM  
Acidity error -0.81079 mM

## Warnings and errors

Errors None  
Warnings None

## Sample logD and percent species

| pH     | M11_octanol<br>logD | M11_octanol<br>M11_octanolH | M11_octanol<br>M11_octanol | M11_octanol<br>M11_octanolH* | M11_octanol<br>M11_octanol* | Comment    |
|--------|---------------------|-----------------------------|----------------------------|------------------------------|-----------------------------|------------|
| 1.000  | -0.20               | 61.06 %                     | 0.08 %                     | 28.50 %                      | 10.36 %                     | Stomach pH |
| 1.200  | -0.13               | 57.55 %                     | 0.12 %                     | 26.86 %                      | 15.48 %                     |            |
| 2.000  | 0.33                | 31.48 %                     | 0.41 %                     | 14.69 %                      | 53.42 %                     |            |
| 3.000  | 1.19                | 5.39 %                      | 0.69 %                     | 2.51 %                       | 91.40 %                     |            |
| 4.000  | 1.87                | 0.58 %                      | 0.75 %                     | 0.27 %                       | 98.40 %                     |            |
| 5.000  | 2.09                | 0.06 %                      | 0.75 %                     | 0.03 %                       | 99.16 %                     | Blood pH   |
| 6.000  | 2.12                | 0.01 %                      | 0.75 %                     | 0.00 %                       | 99.24 %                     |            |
| 6.500  | 2.12                | 0.00 %                      | 0.75 %                     | 0.00 %                       | 99.24 %                     |            |
| 7.000  | 2.12                | 0.00 %                      | 0.75 %                     | 0.00 %                       | 99.25 %                     |            |
| 7.400  | 2.12                | 0.00 %                      | 0.75 %                     | 0.00 %                       | 99.25 %                     |            |
| 8.000  | 2.12                | 0.00 %                      | 0.75 %                     | 0.00 %                       | 99.25 %                     |            |
| 9.000  | 2.12                | 0.00 %                      | 0.75 %                     | 0.00 %                       | 99.25 %                     |            |
| 10.000 | 2.12                | 0.00 %                      | 0.75 %                     | 0.00 %                       | 99.25 %                     |            |
| 11.000 | 2.12                | 0.00 %                      | 0.75 %                     | 0.00 %                       | 99.25 %                     |            |
| 12.000 | 2.12                | 0.00 %                      | 0.75 %                     | 0.00 %                       | 99.25 %                     |            |

Sample name: **M11\_octanol**  
 Assay name: **pH-metric high logP**  
 Assay ID: **18C-09010**  
 Filename: **C:\Sirius\_T3\Mehtap\20180309\_exp31\_logP\_T3-2\18C-09010\_M11\_octanol\_pH-metric high logP.t3r**

Experiment start time: **3/9/2018 4:01:24 PM**  
 Analyst: **Pion**  
 Instrument ID: **T312060**

## Graphs

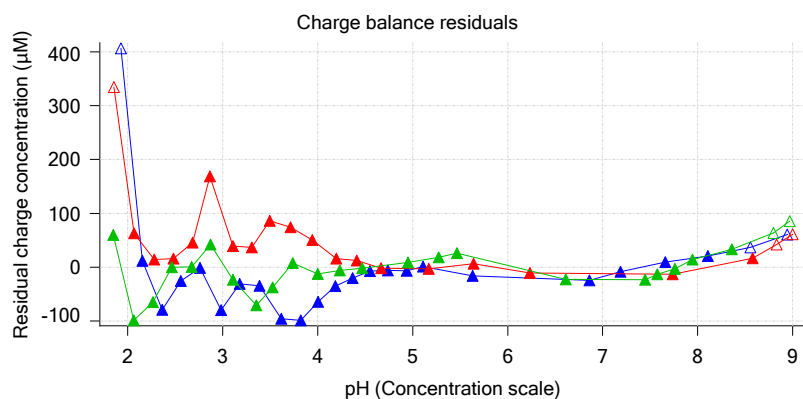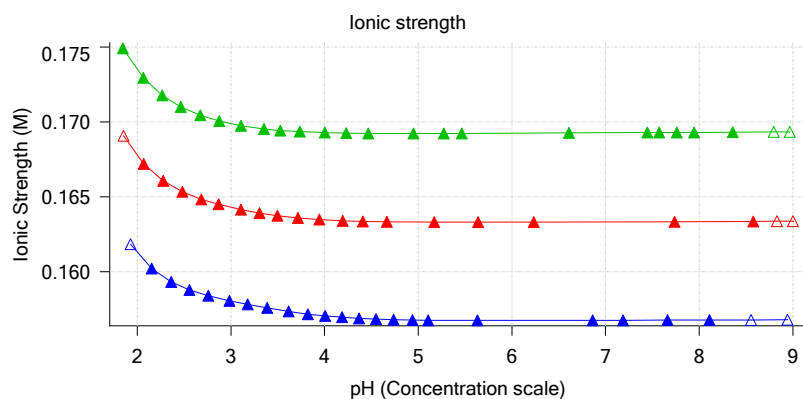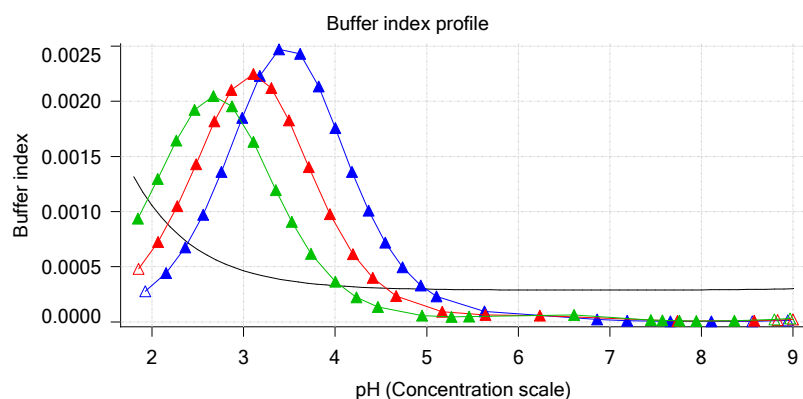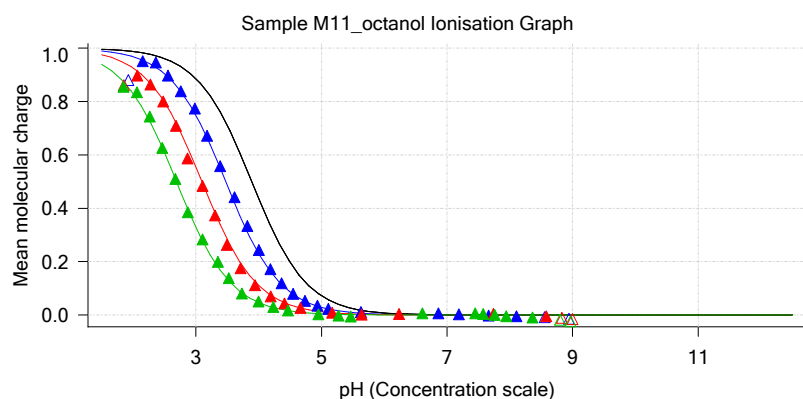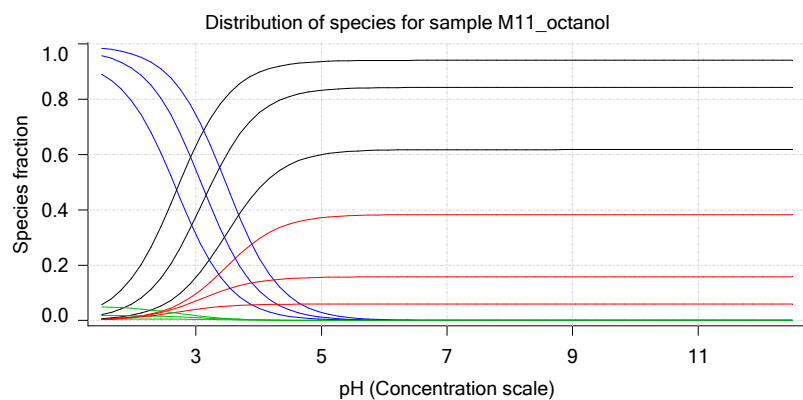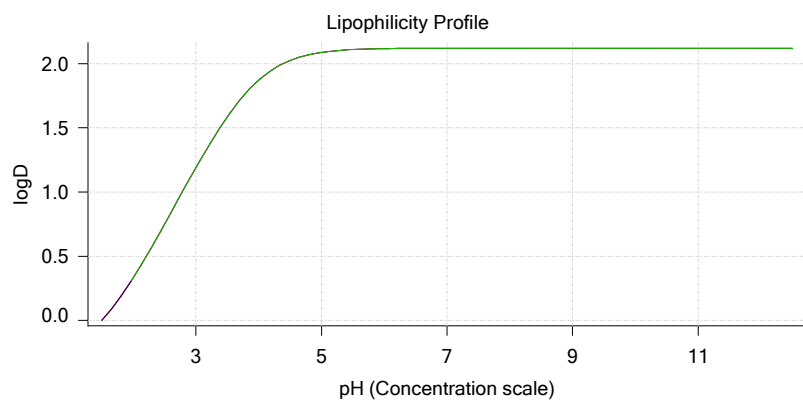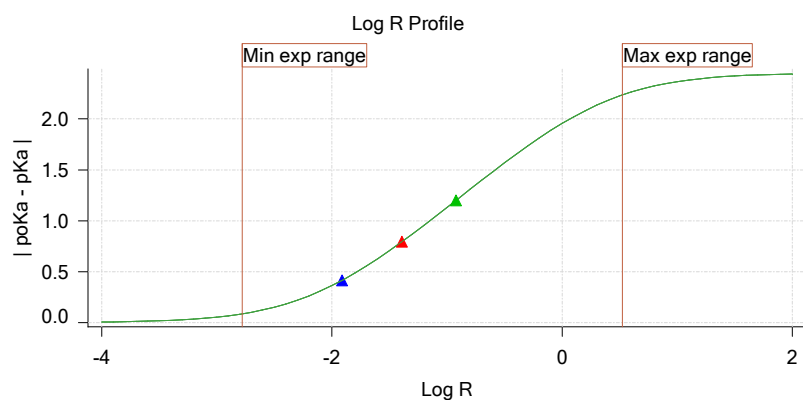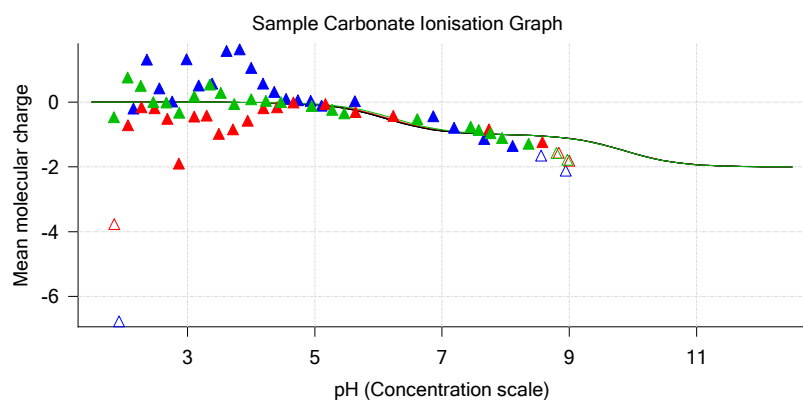

|              |                                                                                                   |                        |                            |
|--------------|---------------------------------------------------------------------------------------------------|------------------------|----------------------------|
| Sample name: | <b>M11_octanol</b>                                                                                | Experiment start time: | <b>3/9/2018 4:01:24 PM</b> |
| Assay name:  | <b>pH-metric high logP</b>                                                                        | Analyst:               | <b>Pion</b>                |
| Assay ID:    | <b>18C-09010</b>                                                                                  | Instrument ID:         | <b>T312060</b>             |
| Filename:    | <b>C:\Sirius_T3\Mehtap\20180309_exp31_logP_T3-2\18C-09010_M11_octanol_pH-metric high logP.t3r</b> |                        |                            |

## Graphs (continued)

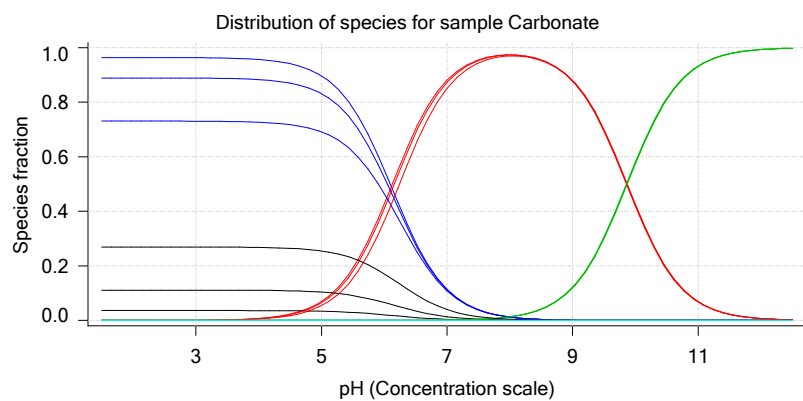

Sample name: **M11\_octanol**  
 Assay name: **pH-metric high logP**  
 Assay ID: **18C-09010**  
 Filename: **C:\Sirius\_T3\Mehtap\20180309\_exp31\_logP\_T3-2\18C-09010\_M11\_octanol\_pH-metric high logP.t3r**

Experiment start time: **3/9/2018 4:01:24 PM**  
 Analyst: **Pion**  
 Instrument ID: **T312060**

## pH-metric high logP Titration 1 of 3 18C-09010 Points 1 to 24

### Overall results

RMSD 0.632  
 Average ionic strength 0.157 M  
 Average temperature 24.9°C  
 Partition ratio 0.0123 : 1  
 Analyte concentration range 4427.7 µM to 4566.6 µM  
 Total points considered 21 of 24

### Warnings and errors

Errors None  
 Warnings None

### Four-Plus parameters

|       |        |                     |                           |
|-------|--------|---------------------|---------------------------|
| Alpha | 0.102  | 3/9/2018 4:01:24 PM | C:\Sirius_T3\HCl18C09.t3r |
| S     | 0.9967 | 3/9/2018 4:01:24 PM | C:\Sirius_T3\HCl18C09.t3r |
| jH    | 1.2    | 3/9/2018 4:01:24 PM | C:\Sirius_T3\HCl18C09.t3r |
| jOH   | 0.0    | 3/9/2018 4:01:24 PM | C:\Sirius_T3\HCl18C09.t3r |

### Titrants

|            |          |                     |                           |
|------------|----------|---------------------|---------------------------|
| 0.50 M HCl | 0.999843 | 3/9/2018 4:01:24 PM | C:\Sirius_T3\HCl18C09.t3r |
| 0.50 M KOH | 0.999845 | 3/9/2018 4:01:24 PM | C:\Sirius_T3\KOH18B27.t3r |

### Sample

|                                  |       |
|----------------------------------|-------|
| M11_octanol concentration factor | 0.962 |
| Base pKa 1                       | 3.89  |
| logP (XH +)                      | 0.52  |
| logP (neutral X)                 | 2.10  |

### Sample graphs

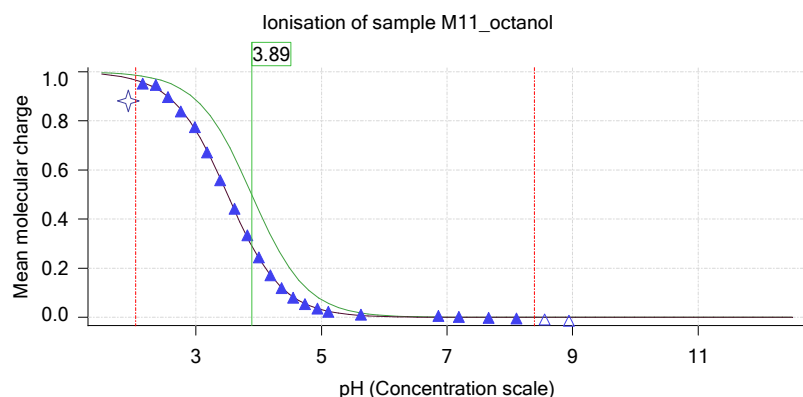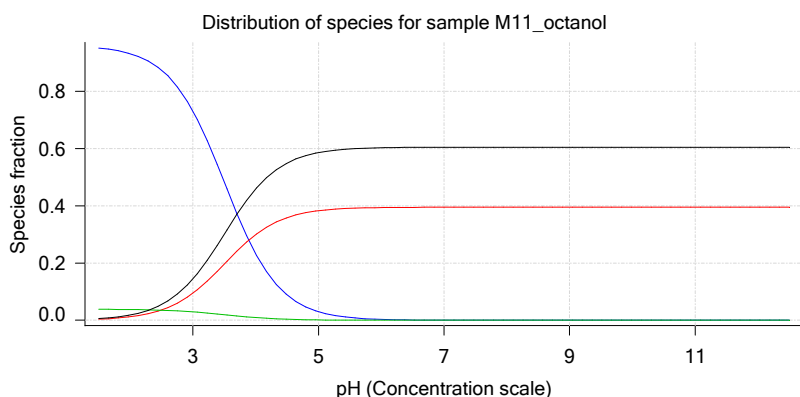

Sample name: **M11\_octanol**  
 Assay name: **pH-metric high logP**  
 Assay ID: **18C-09010**  
 Filename: **C:\Sirius\_T3\Mehtap\20180309\_exp31\_logP\_T3-2\18C-09010\_M11\_octanol\_pH-metric high logP.t3r**

Experiment start time: **3/9/2018 4:01:24 PM**  
 Analyst: **Pion**  
 Instrument ID: **T312060**

## Sample graphs (continued)

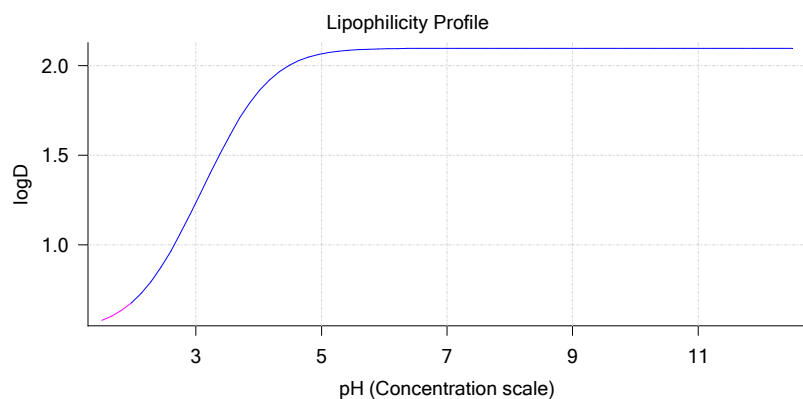

## Sample logD and percent species

| pH     | M11_octanol<br>logD | M11_octanol<br>M11_octanolH | M11_octanol<br>M11_octanolH | M11_octanol<br>M11_octanolH* | M11_octanol<br>M11_octanol* | Comment    |
|--------|---------------------|-----------------------------|-----------------------------|------------------------------|-----------------------------|------------|
| 1.000  | 0.54                | 95.82 %                     | 0.12 %                      | 3.86 %                       | 0.19 %                      | Stomach pH |
| 1.200  | 0.55                | 95.65 %                     | 0.20 %                      | 3.86 %                       | 0.30 %                      |            |
| 2.000  | 0.68                | 93.20 %                     | 1.20 %                      | 3.76 %                       | 1.84 %                      |            |
| 3.000  | 1.23                | 73.19 %                     | 9.43 %                      | 2.95 %                       | 14.43 %                     |            |
| 4.000  | 1.86                | 23.25 %                     | 29.95 %                     | 0.94 %                       | 45.86 %                     |            |
| 5.000  | 2.07                | 2.97 %                      | 38.29 %                     | 0.12 %                       | 58.62 %                     | Blood pH   |
| 6.000  | 2.09                | 0.31 %                      | 39.39 %                     | 0.01 %                       | 60.30 %                     |            |
| 6.500  | 2.10                | 0.10 %                      | 39.47 %                     | 0.00 %                       | 60.43 %                     |            |
| 7.000  | 2.10                | 0.03 %                      | 39.50 %                     | 0.00 %                       | 60.47 %                     |            |
| 7.400  | 2.10                | 0.01 %                      | 39.51 %                     | 0.00 %                       | 60.48 %                     |            |
| 8.000  | 2.10                | 0.00 %                      | 39.51 %                     | 0.00 %                       | 60.49 %                     |            |
| 9.000  | 2.10                | 0.00 %                      | 39.51 %                     | 0.00 %                       | 60.49 %                     |            |
| 10.000 | 2.10                | 0.00 %                      | 39.51 %                     | 0.00 %                       | 60.49 %                     |            |
| 11.000 | 2.10                | 0.00 %                      | 39.51 %                     | 0.00 %                       | 60.49 %                     |            |
| 12.000 | 2.10                | 0.00 %                      | 39.51 %                     | 0.00 %                       | 60.49 %                     |            |

## Carbonate and acidity

Carbonate 0.060 mM  
 Acidity error -0.464 mM

## Other graphs

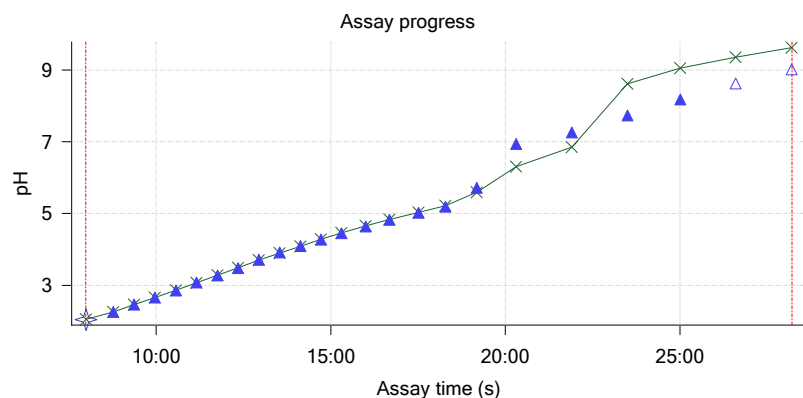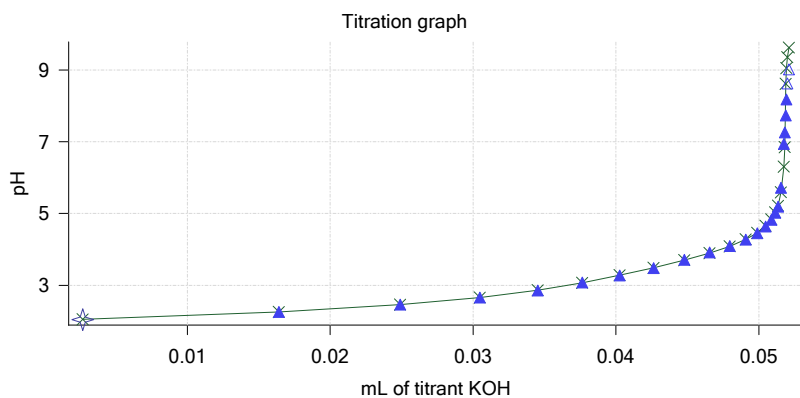

Sample name: **M11\_octanol**  
 Assay name: **pH-metric high logP**  
 Assay ID: **18C-09010**  
 Filename: **C:\Sirius\_T3\Mehtap\20180309\_exp31\_logP\_T3-2\18C-09010\_M11\_octanol\_pH-metric high logP.t3r**

Experiment start time: **3/9/2018 4:01:24 PM**  
 Analyst: **Pion**  
 Instrument ID: **T312060**

## Other graphs (continued)

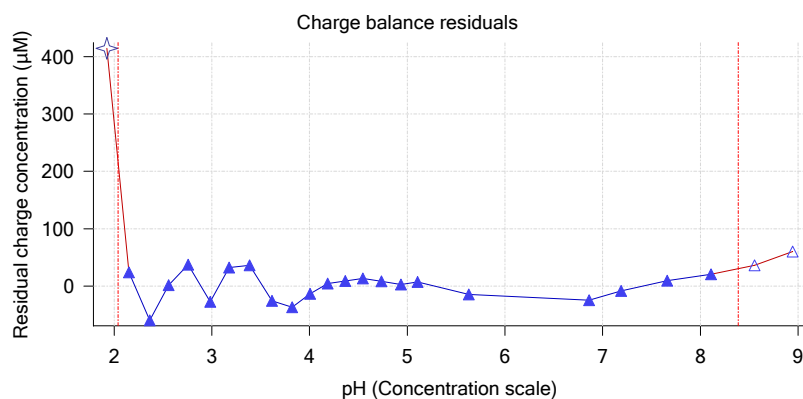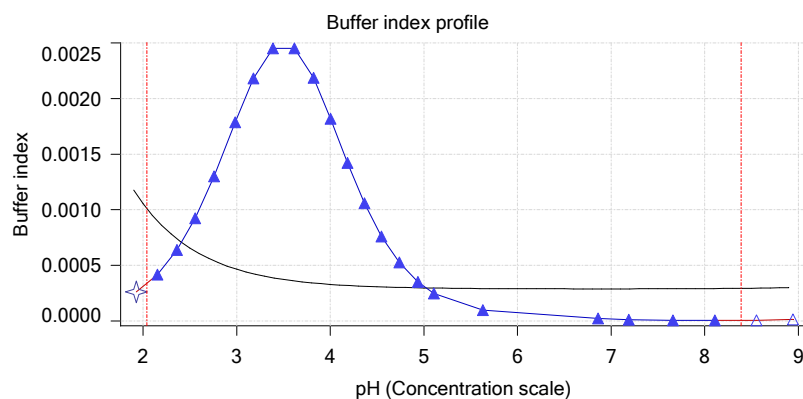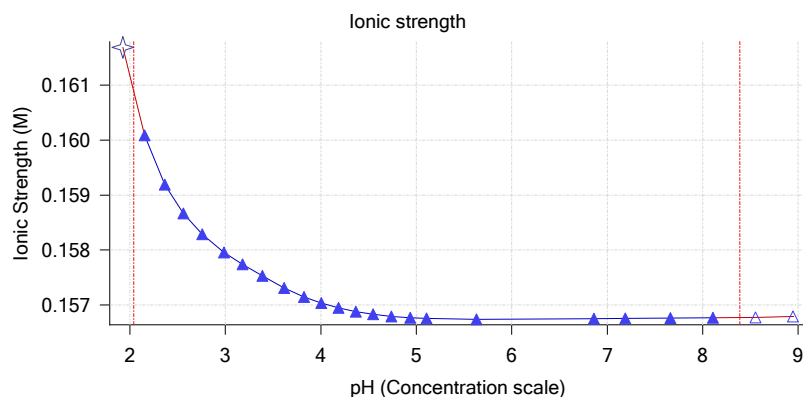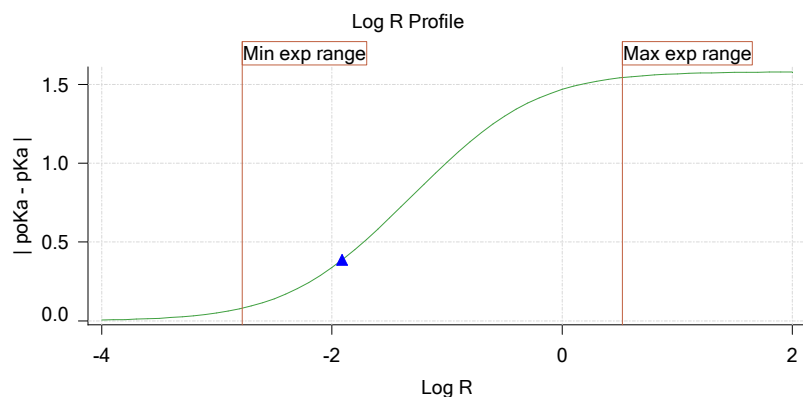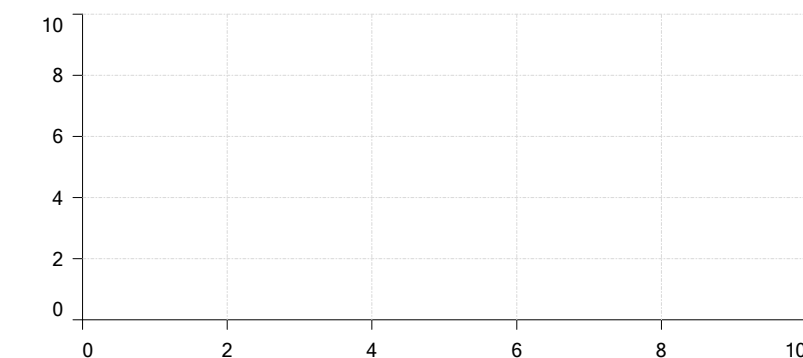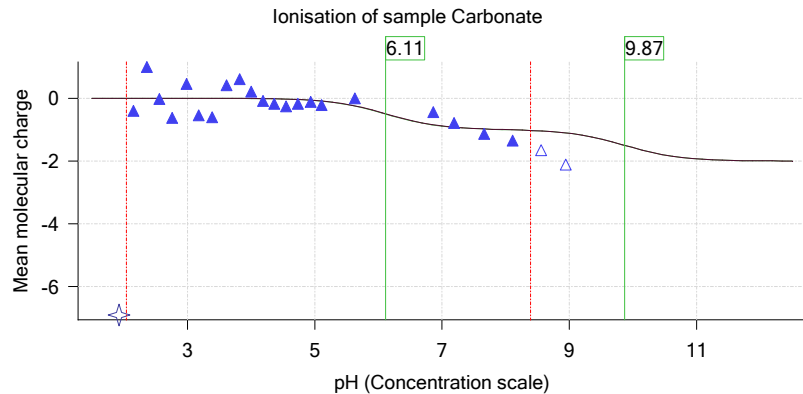

Sample name: **M11\_octanol**  
 Assay name: **pH-metric high logP**  
 Assay ID: **18C-09010**  
 Filename: **C:\Sirius\_T3\Mehtap\20180309\_exp31\_logP\_T3-2\18C-09010\_M11\_octanol\_pH-metric high logP.t3r**

Experiment start time: **3/9/2018 4:01:24 PM**  
 Analyst: **Pion**  
 Instrument ID: **T312060**

## pH-metric high logP Titration 2 of 3 18C-09010 Points 25 to 45

### Overall results

RMSD 0.373  
 Average ionic strength 0.164 M  
 Average temperature 25.0°C  
 Partition ratio 0.0405 : 1  
 Analyte concentration range 4011.7 µM to 4147.6 µM  
 Total points considered 18 of 21

### Warnings and errors

Errors None  
 Warnings None

### Four-Plus parameters

Alpha 0.102 3/9/2018 4:01:24 PM C:\Sirius\_T3\HCl18C09.t3r  
 S 0.9967 3/9/2018 4:01:24 PM C:\Sirius\_T3\HCl18C09.t3r  
 jH 1.2 3/9/2018 4:01:24 PM C:\Sirius\_T3\HCl18C09.t3r  
 jOH 0.0 3/9/2018 4:01:24 PM C:\Sirius\_T3\HCl18C09.t3r

### Titrants

0.50 M HCl 0.999843 3/9/2018 4:01:24 PM C:\Sirius\_T3\HCl18C09.t3r  
 0.50 M KOH 0.999845 3/9/2018 4:01:24 PM C:\Sirius\_T3\KOH18B27.t3r

### Sample

M11\_octanol concentration factor 0.930  
 Base pKa 1 3.89  
 logP (XH +) 0.55  
 logP (neutral X) 2.22

### Sample graphs

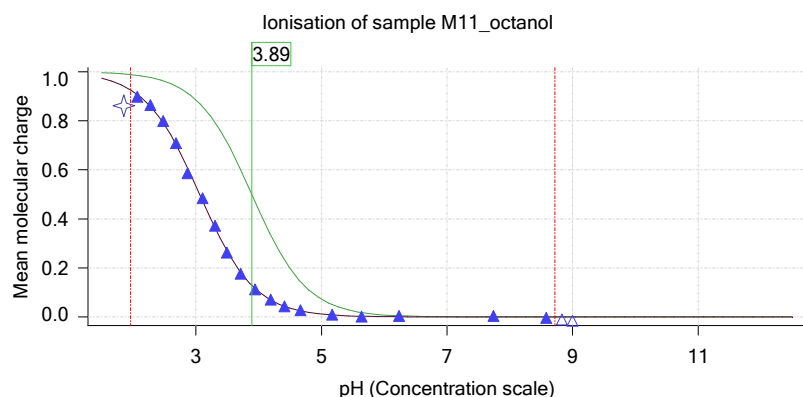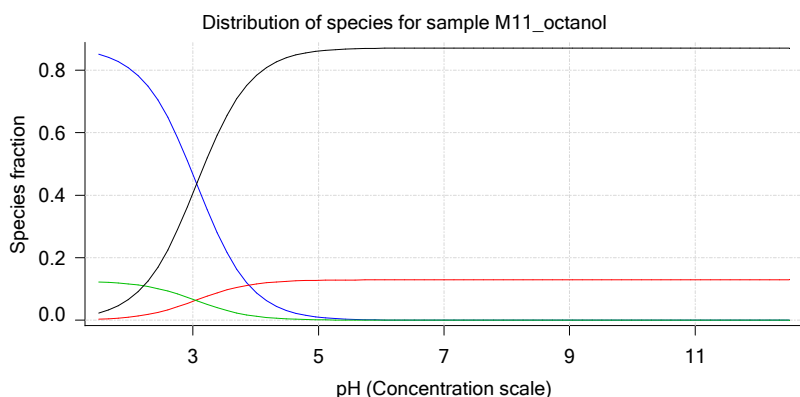

Sample name: **M11\_octanol**  
Assay name: **pH-metric high logP**  
Assay ID: **18C-09010**  
Filename: **C:\Sirius\_T3\Mehtap\20180309\_exp31\_logP\_T3-2\18C-09010\_M11\_octanol\_pH-metric high logP.t3r**

Experiment start time: **3/9/2018 4:01:24 PM**  
Analyst: **Pion**  
Instrument ID: **T312060**

## Sample graphs (continued)

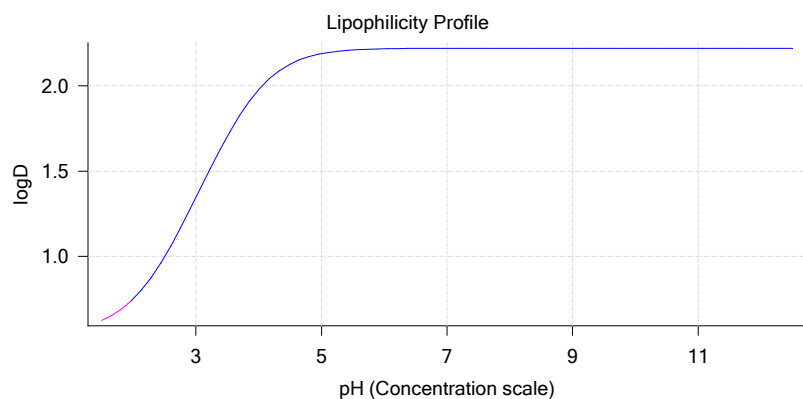

## Sample logD and percent species

| pH     | M11_octanol<br>logD | M11_octanol<br>M11_octanolH | M11_octanol<br>M11_octanol | M11_octanol<br>M11_octanolH* | M11_octanol<br>M11_octanol* | Comment    |
|--------|---------------------|-----------------------------|----------------------------|------------------------------|-----------------------------|------------|
| 1.000  | 0.57                | 86.67 %                     | 0.11 %                     | 12.47 %                      | 0.75 %                      | Stomach pH |
| 1.200  | 0.59                | 86.23 %                     | 0.18 %                     | 12.40 %                      | 1.19 %                      |            |
| 2.000  | 0.75                | 80.41 %                     | 1.04 %                     | 11.57 %                      | 6.98 %                      |            |
| 3.000  | 1.34                | 46.71 %                     | 6.02 %                     | 6.72 %                       | 40.55 %                     |            |
| 4.000  | 1.98                | 9.00 %                      | 11.59 %                    | 1.29 %                       | 78.12 %                     |            |
| 5.000  | 2.19                | 0.99 %                      | 12.77 %                    | 0.14 %                       | 86.09 %                     | Blood pH   |
| 6.000  | 2.22                | 0.10 %                      | 12.91 %                    | 0.01 %                       | 86.98 %                     |            |
| 6.500  | 2.22                | 0.03 %                      | 12.92 %                    | 0.00 %                       | 87.05 %                     |            |
| 7.000  | 2.22                | 0.01 %                      | 12.92 %                    | 0.00 %                       | 87.07 %                     |            |
| 7.400  | 2.22                | 0.00 %                      | 12.92 %                    | 0.00 %                       | 87.08 %                     |            |
| 8.000  | 2.22                | 0.00 %                      | 12.92 %                    | 0.00 %                       | 87.08 %                     |            |
| 9.000  | 2.22                | 0.00 %                      | 12.92 %                    | 0.00 %                       | 87.08 %                     |            |
| 10.000 | 2.22                | 0.00 %                      | 12.92 %                    | 0.00 %                       | 87.08 %                     |            |
| 11.000 | 2.22                | 0.00 %                      | 12.92 %                    | 0.00 %                       | 87.08 %                     |            |
| 12.000 | 2.22                | 0.00 %                      | 12.92 %                    | 0.00 %                       | 87.08 %                     |            |

## Carbonate and acidity

Carbonate 0.089 mM  
Acidity error -0.757 mM

## Other graphs

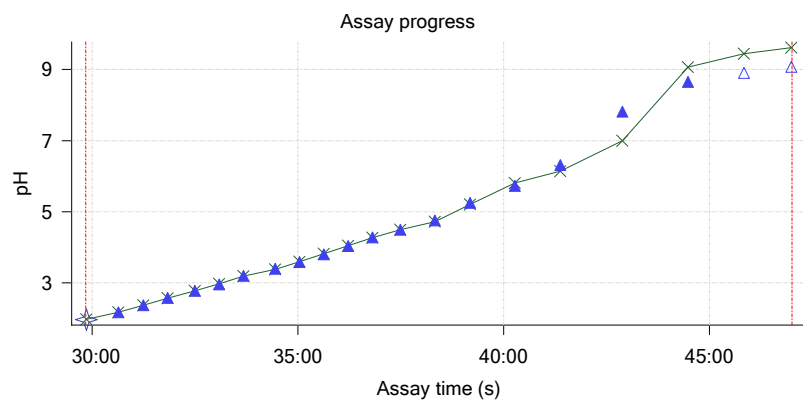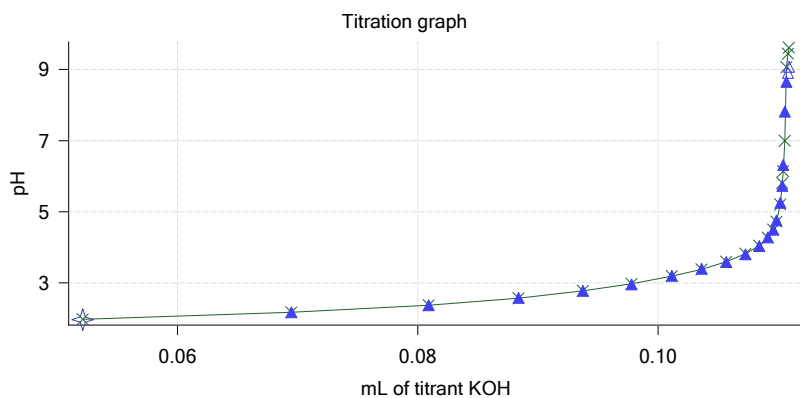



Sample name: **M11\_octanol**  
 Assay name: **pH-metric high logP**  
 Assay ID: **18C-09010**  
 Filename: **C:\Sirius\_T3\Mehtap\20180309\_exp31\_logP\_T3-2\18C-09010\_M11\_octanol\_pH-metric high logP.t3r**

Experiment start time: **3/9/2018 4:01:24 PM**  
 Analyst: **Pion**  
 Instrument ID: **T312060**

## Other graphs (continued)

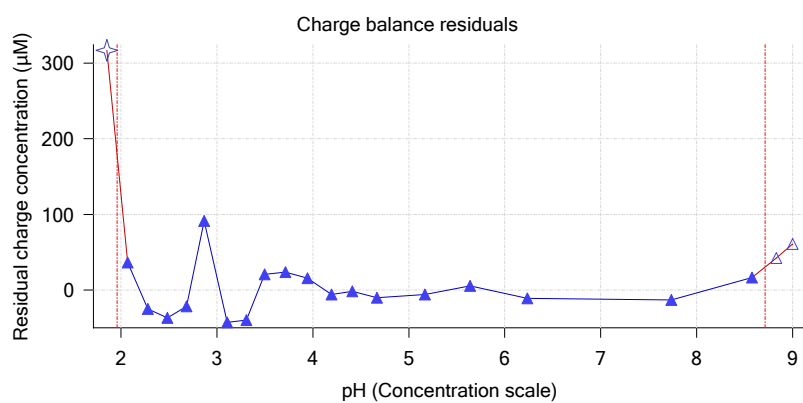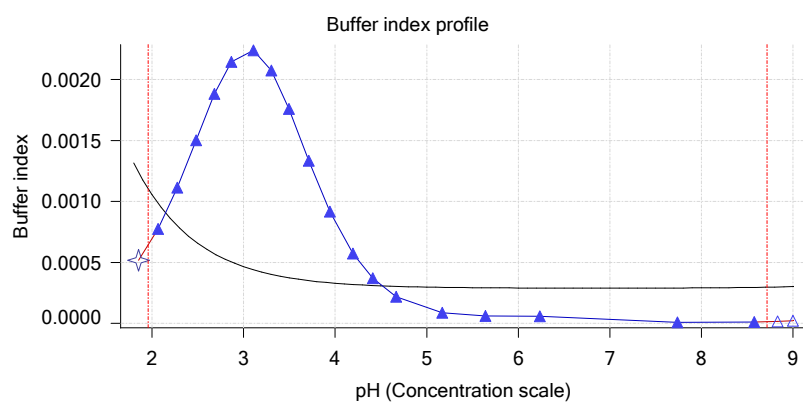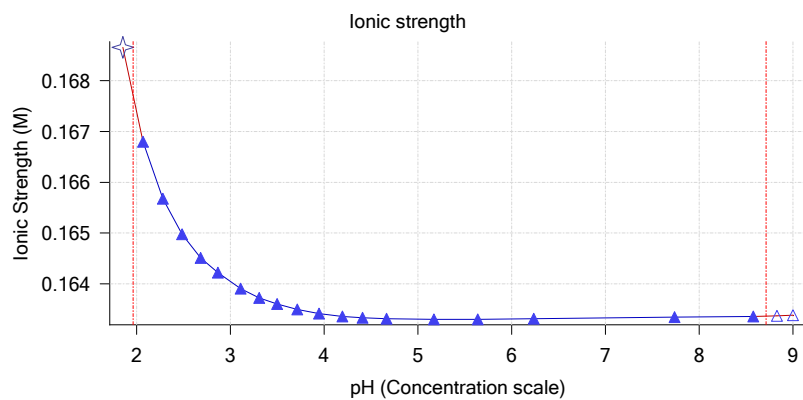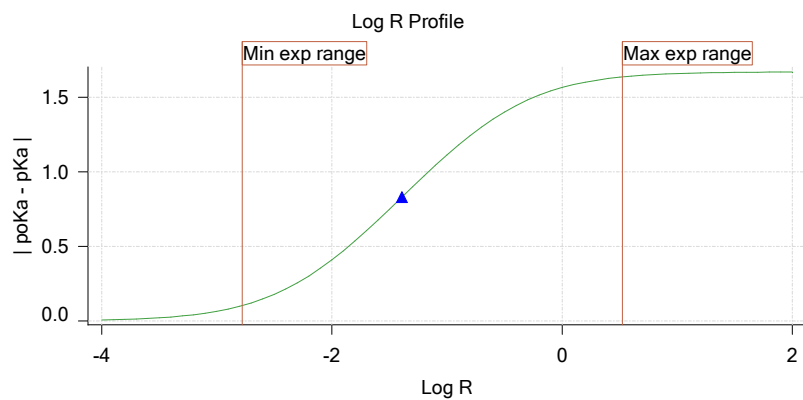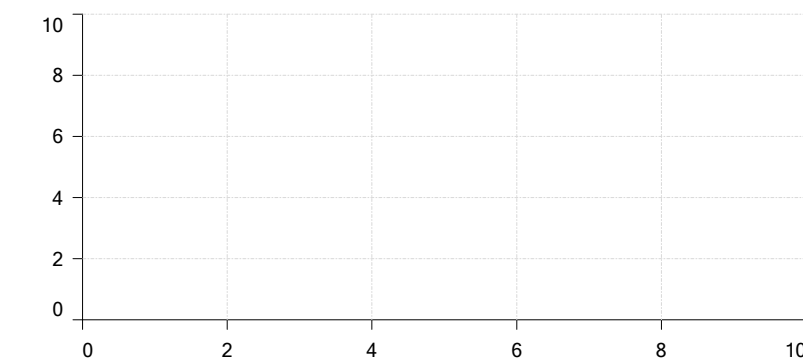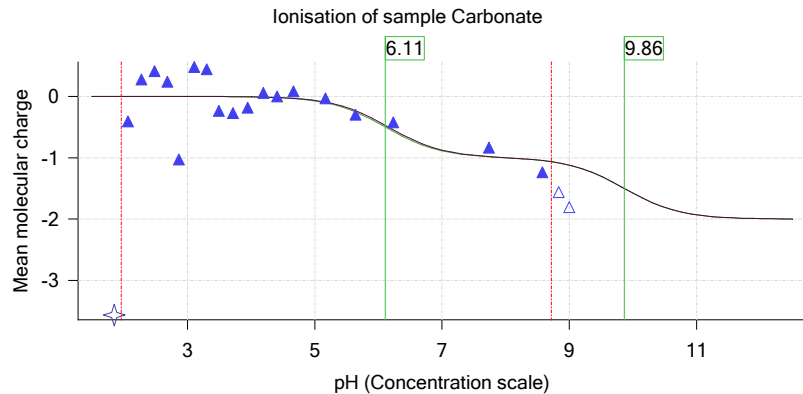

Sample name: **M11\_octanol**  
 Assay name: **pH-metric high logP**  
 Assay ID: **18C-09010**  
 Filename: **C:\Sirius\_T3\Mehtap\20180309\_exp31\_logP\_T3-2\18C-09010\_M11\_octanol\_pH-metric high logP.t3r**

Experiment start time: **3/9/2018 4:01:24 PM**  
 Analyst: **Pion**  
 Instrument ID: **T312060**

pH-metric high logP Titration 3 of 3 18C-09010 Points 46 to 69

## Overall results

RMSD 0.548  
 Average ionic strength 0.170 M  
 Average temperature 25.0°C  
 Partition ratio 0.1193 : 1  
 Analyte concentration range 3477.2 µM to 3586.0 µM  
 Total points considered 22 of 24

## Warnings and errors

Errors None  
 Warnings None

## Four-Plus parameters

Alpha 0.102 3/9/2018 4:01:24 PM C:\Sirius\_T3\HCl18C09.t3r  
 S 0.9967 3/9/2018 4:01:24 PM C:\Sirius\_T3\HCl18C09.t3r  
 jH 1.2 3/9/2018 4:01:24 PM C:\Sirius\_T3\HCl18C09.t3r  
 jOH 0.0 3/9/2018 4:01:24 PM C:\Sirius\_T3\HCl18C09.t3r

## Titrants

0.50 M HCl 0.999843 3/9/2018 4:01:24 PM C:\Sirius\_T3\HCl18C09.t3r  
 0.50 M KOH 0.999845 3/9/2018 4:01:24 PM C:\Sirius\_T3\KOH18B27.t3r

## Sample

M11\_octanol concentration factor 0.907  
 Base pKa 1 3.89  
 logP (XH +) 0.55  
 logP (neutral X) 2.25

## Sample graphs

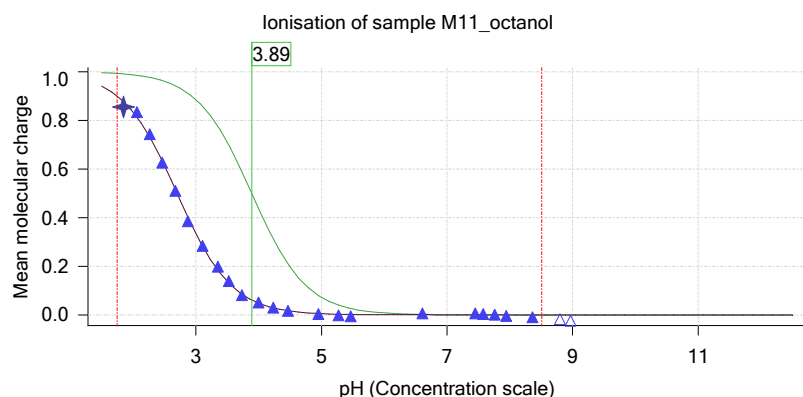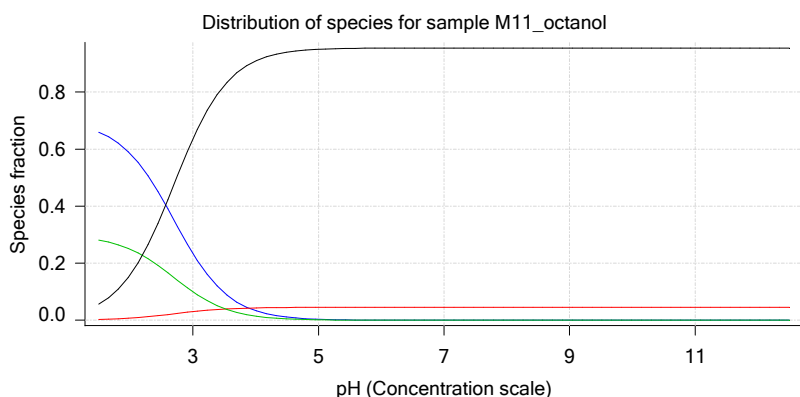

Sample name: **M11\_octanol**  
 Assay name: **pH-metric high logP**  
 Assay ID: **18C-09010**  
 Filename: **C:\Sirius\_T3\Mehtap\20180309\_exp31\_logP\_T3-2\18C-09010\_M11\_octanol\_pH-metric high logP.t3r**

Experiment start time: **3/9/2018 4:01:24 PM**  
 Analyst: **Pion**  
 Instrument ID: **T312060**

## Sample graphs (continued)

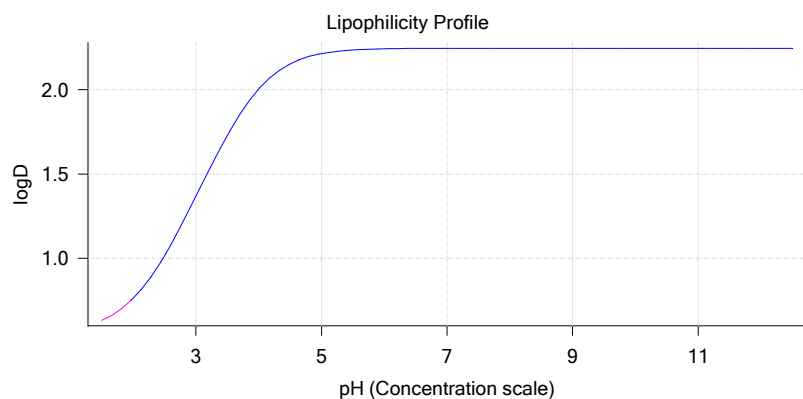

## Sample logD and percent species

| pH     | M11_octanol<br>logD | M11_octanol<br>M11_octanolH | M11_octanol<br>M11_octanolH | M11_octanol<br>M11_octanolH* | M11_octanol<br>M11_octanol* | Comment    |
|--------|---------------------|-----------------------------|-----------------------------|------------------------------|-----------------------------|------------|
| 1.000  | 0.58                | 68.74 %                     | 0.09 %                      | 29.31 %                      | 1.86 %                      | Stomach pH |
| 1.200  | 0.59                | 67.97 %                     | 0.14 %                      | 28.98 %                      | 2.92 %                      |            |
| 2.000  | 0.76                | 58.48 %                     | 0.75 %                      | 24.93 %                      | 15.84 %                     |            |
| 3.000  | 1.37                | 23.45 %                     | 3.02 %                      | 10.00 %                      | 63.53 %                     |            |
| 4.000  | 2.00                | 3.36 %                      | 4.32 %                      | 1.43 %                       | 90.89 %                     |            |
| 5.000  | 2.21                | 0.35 %                      | 4.52 %                      | 0.15 %                       | 94.98 %                     | Blood pH   |
| 6.000  | 2.24                | 0.04 %                      | 4.54 %                      | 0.02 %                       | 95.41 %                     |            |
| 6.500  | 2.25                | 0.01 %                      | 4.54 %                      | 0.00 %                       | 95.44 %                     |            |
| 7.000  | 2.25                | 0.00 %                      | 4.54 %                      | 0.00 %                       | 95.46 %                     |            |
| 7.400  | 2.25                | 0.00 %                      | 4.54 %                      | 0.00 %                       | 95.46 %                     |            |
| 8.000  | 2.25                | 0.00 %                      | 4.54 %                      | 0.00 %                       | 95.46 %                     |            |
| 9.000  | 2.25                | 0.00 %                      | 4.54 %                      | 0.00 %                       | 95.46 %                     |            |
| 10.000 | 2.25                | 0.00 %                      | 4.54 %                      | 0.00 %                       | 95.46 %                     |            |
| 11.000 | 2.25                | 0.00 %                      | 4.54 %                      | 0.00 %                       | 95.46 %                     |            |
| 12.000 | 2.25                | 0.00 %                      | 4.54 %                      | 0.00 %                       | 95.46 %                     |            |

## Carbonate and acidity

 Carbonate 0.129 mM  
 Acidity error -0.811 mM

## Other graphs

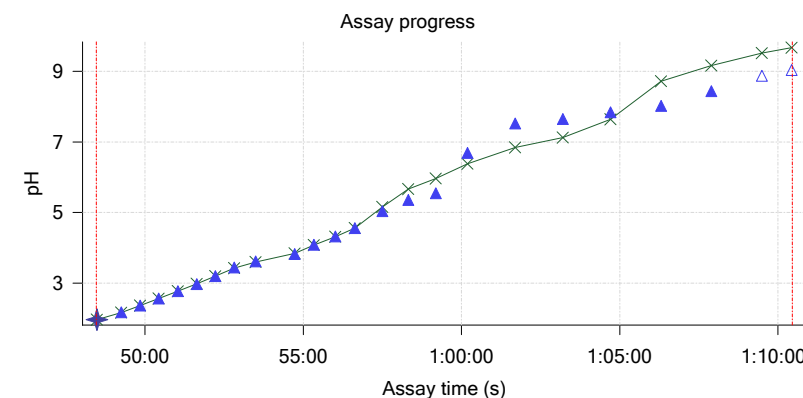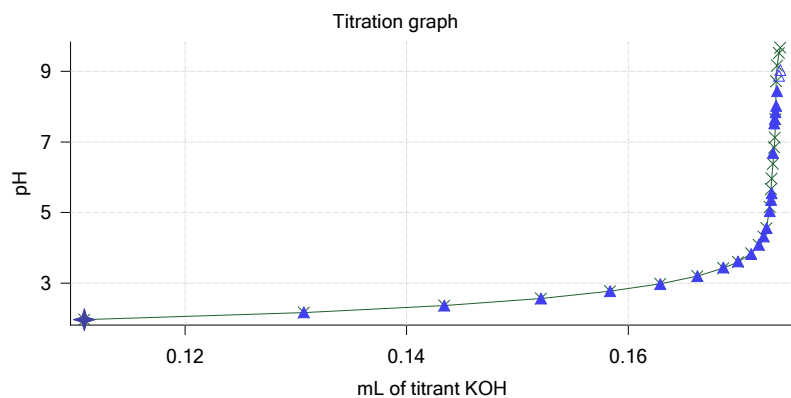

Sample name: **M11\_octanol**  
 Assay name: **pH-metric high logP**  
 Assay ID: **18C-09010**  
 Filename: **C:\Sirius\_T3\Mehtap\20180309\_exp31\_logP\_T3-2\18C-09010\_M11\_octanol\_pH-metric high logP.t3r**

Experiment start time: **3/9/2018 4:01:24 PM**  
 Analyst: **Pion**  
 Instrument ID: **T312060**

## Other graphs (continued)

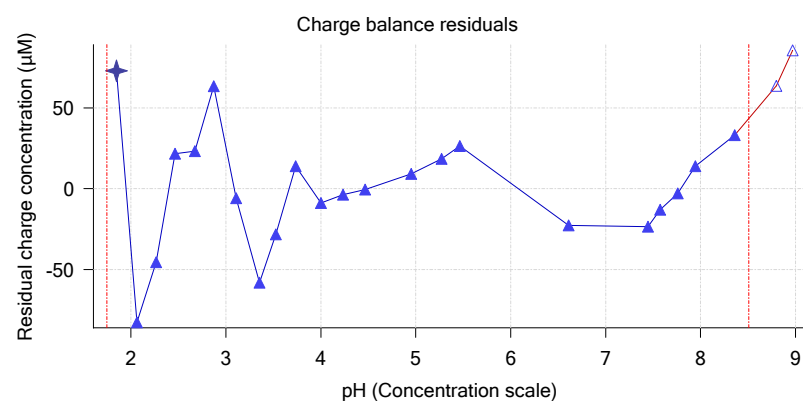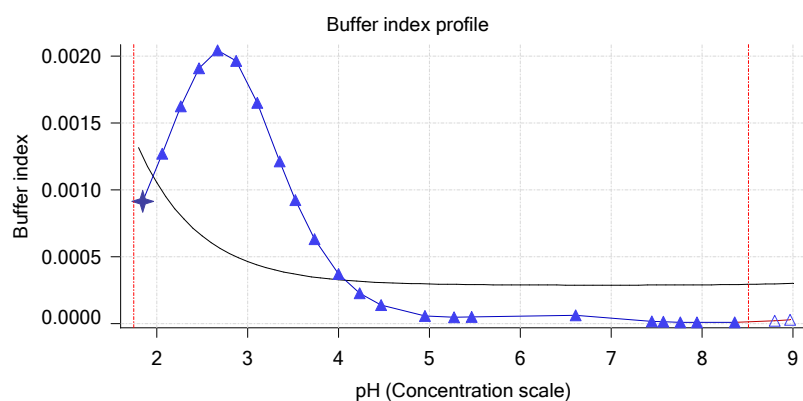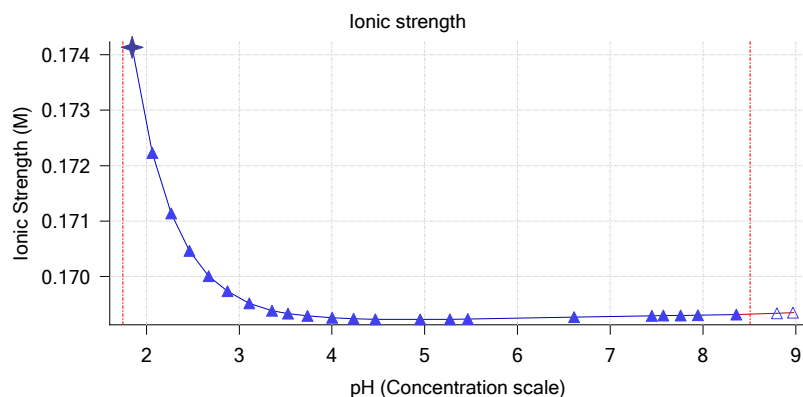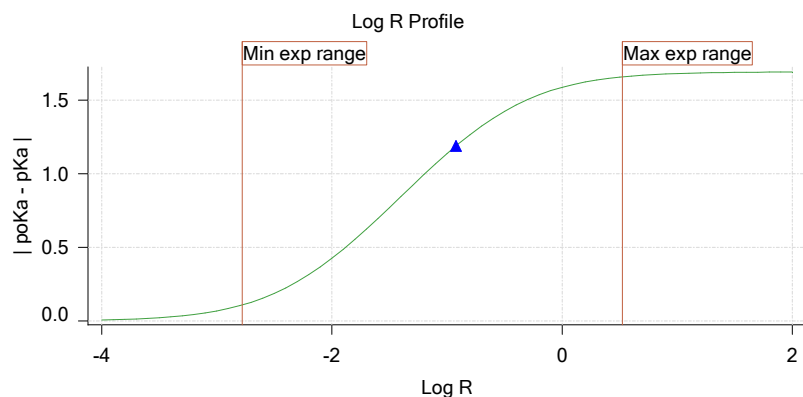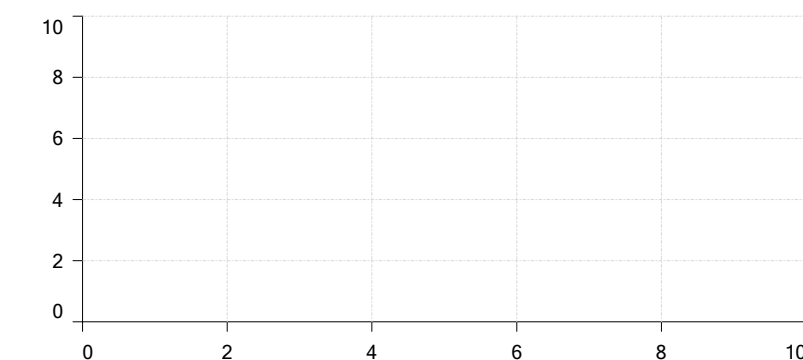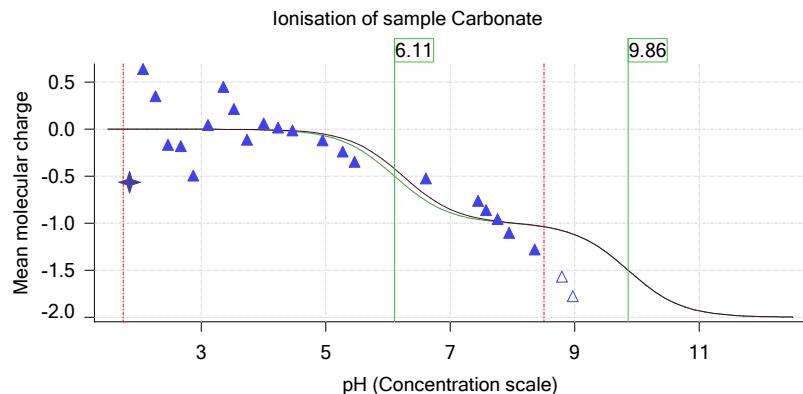

Sample name: **M11\_octanol**  
 Assay name: **pH-metric high logP**  
 Assay ID: **18C-09010**  
 Filename: **C:\Sirius\_T3\Mehtap\20180309\_exp31\_logP\_T3-2\18C-09010\_M11\_octanol\_pH-metric high logP.t3r**

Experiment start time: **3/9/2018 4:01:24 PM**  
 Analyst: **Pion**  
 Instrument ID: **T312060**

## Assay Model

| Settings                          | Value        | Date/Time changed    | Imported from      |
|-----------------------------------|--------------|----------------------|--------------------|
| Sample name                       | M11_octanol  | 2/27/2018 5:54:30 PM | User entered value |
| Sample by                         | Weight       |                      | Default value      |
| Sample weight                     | 0.001520 g   | 3/9/2018 2:22:09 PM  | User entered value |
| Formula weight                    | 211.22 g/mol | 2/27/2018 5:54:30 PM | User entered value |
| Solubility                        | Unknown      |                      | Default value      |
| Molecular weight                  | 211.22       | 2/27/2018 5:54:30 PM | User entered value |
| Individual pKa ionic environments | No           |                      | Default value      |
| Number of pKas                    | 1            | 2/27/2018 5:54:30 PM | User entered value |
| Sample is a                       | Base         | 2/27/2018 5:54:30 PM | User entered value |
| pKa 1                             | 3.89         | 2/27/2018 5:54:30 PM | User entered value |
| logp (XH +)                       | 0.55         | 3/2/2018 4:29:35 PM  | User entered value |
| logP (neutral X)                  | 2.19         | 3/2/2018 4:29:30 PM  | User entered value |

## Events

| Time    | Event             | Water      | Acid       | Base       | Octanol    | pH    | dpH/dt   | pH R-squared | pH SD   | dpH/dt time         |
|---------|-------------------|------------|------------|------------|------------|-------|----------|--------------|---------|---------------------|
| 5:00.2  | Initial pH = 9.10 |            |            |            |            |       |          |              |         |                     |
| 7:59.8  | Data point 1      | 1.50000 mL | 0.05315 mL | 0.00268 mL | 0.01999 mL | 2.037 | -0.00511 | 0.30733      | 0.00046 | 10.0 s              |
| 8:46.1  | Data point 2      | 1.50000 mL | 0.05315 mL | 0.01642 mL | 0.01999 mL | 2.256 | 0.00288  | 0.69530      | 0.00017 | 10.5 s              |
| 9:22.2  | Data point 3      | 1.50000 mL | 0.05315 mL | 0.02491 mL | 0.01999 mL | 2.463 | 0.00374  | 0.32148      | 0.00033 | 10.0 s              |
| 9:57.8  | Data point 4      | 1.50000 mL | 0.05315 mL | 0.03048 mL | 0.01999 mL | 2.655 | 0.00078  | 0.10371      | 0.00012 | 10.5 s              |
| 10:33.9 | Data point 5      | 1.50000 mL | 0.05315 mL | 0.03452 mL | 0.01999 mL | 2.854 | -0.00337 | 0.19592      | 0.00038 | 10.0 s              |
| 11:09.3 | Data point 6      | 1.50000 mL | 0.05315 mL | 0.03765 mL | 0.01999 mL | 3.078 | 0.00146  | 0.01563      | 0.00058 | 10.5 s              |
| 11:45.3 | Data point 7      | 1.50000 mL | 0.05315 mL | 0.04026 mL | 0.01999 mL | 3.271 | -0.00477 | 0.53594      | 0.00032 | 10.0 s              |
| 12:20.8 | Data point 8      | 1.50000 mL | 0.05315 mL | 0.04264 mL | 0.01999 mL | 3.480 | -0.00721 | 0.85954      | 0.00038 | 10.0 s              |
| 12:56.3 | Data point 9      | 1.50000 mL | 0.05315 mL | 0.04478 mL | 0.01999 mL | 3.707 | -0.01214 | 0.77245      | 0.00068 | 10.5 s              |
| 13:32.3 | Data point 10     | 1.50000 mL | 0.05315 mL | 0.04657 mL | 0.01999 mL | 3.912 | -0.01020 | 0.53326      | 0.00069 | 10.0 s              |
| 14:07.7 | Data point 11     | 1.50000 mL | 0.05315 mL | 0.04798 mL | 0.01999 mL | 4.094 | -0.00754 | 0.73914      | 0.00043 | 10.0 s              |
| 14:43.1 | Data point 12     | 1.50000 mL | 0.05315 mL | 0.04908 mL | 0.01999 mL | 4.274 | -0.01378 | 0.67663      | 0.00083 | 10.0 s              |
| 15:18.5 | Data point 13     | 1.50000 mL | 0.05315 mL | 0.04988 mL | 0.01999 mL | 4.454 | -0.01794 | 0.90958      | 0.00093 | 16.5 s              |
| 16:00.3 | Data point 14     | 1.50000 mL | 0.05315 mL | 0.05047 mL | 0.01999 mL | 4.635 | -0.01742 | 0.86808      | 0.00092 | 15.0 s              |
| 16:40.7 | Data point 15     | 1.50000 mL | 0.05315 mL | 0.05087 mL | 0.01999 mL | 4.824 | -0.01787 | 0.84622      | 0.00096 | 24.5 s              |
| 17:30.7 | Data point 16     | 1.50000 mL | 0.05315 mL | 0.05115 mL | 0.01999 mL | 5.023 | -0.01827 | 0.90373      | 0.00095 | 21.0 s              |
| 18:17.2 | Data point 17     | 1.50000 mL | 0.05315 mL | 0.05134 mL | 0.01999 mL | 5.193 | -0.01878 | 0.91929      | 0.00097 | 23.0 s              |
| 19:10.8 | Data point 18     | 1.50000 mL | 0.05315 mL | 0.05155 mL | 0.01999 mL | 5.715 | -0.01901 | 0.96541      | 0.00096 | 37.0 s              |
| 20:18.6 | Data point 19     | 1.50000 mL | 0.05315 mL | 0.05174 mL | 0.01999 mL | 6.941 | -0.08865 | 0.99621      | 0.00438 | Timed out at 59.5 s |
| 21:54.2 | Data point 20     | 1.50000 mL | 0.05315 mL | 0.05181 mL | 0.01999 mL | 7.267 | -0.07065 | 0.99539      | 0.00350 | Timed out at 59.5 s |
| 23:29.8 | Data point 21     | 1.50000 mL | 0.05315 mL | 0.05188 mL | 0.01999 mL | 7.738 | -0.08731 | 0.99760      | 0.00432 | Timed out at 59.5 s |
| 25:00.3 | Data point 22     | 1.50000 mL | 0.05315 mL | 0.05193 mL | 0.01999 mL | 8.184 | -0.04618 | 0.99543      | 0.00229 | Timed out at 59.5 s |
| 26:36.0 | Data point 23     | 1.50000 mL | 0.05315 mL | 0.05200 mL | 0.01999 mL | 8.628 | -0.02509 | 0.99264      | 0.00124 | Timed out at 59.5 s |
| 28:11.7 | Data point 24     | 1.50000 mL | 0.05315 mL | 0.05212 mL | 0.01999 mL | 9.017 | -0.01906 | 0.93147      | 0.00097 | 40.5 s              |
| 29:51.6 | Data point 25     | 1.50000 mL | 0.11291 mL | 0.05212 mL | 0.06999 mL | 1.966 | 0.00082  | 0.01226      | 0.00037 | 10.5 s              |
| 30:38.4 | Data point 26     | 1.50000 mL | 0.11291 mL | 0.06950 mL | 0.06999 mL | 2.173 | -0.00810 | 0.69034      | 0.00048 | 10.5 s              |
| 31:14.6 | Data point 27     | 1.50000 mL | 0.11291 mL | 0.08090 mL | 0.06999 mL | 2.379 | 0.00330  | 0.80719      | 0.00018 | 10.0 s              |
| 31:50.1 | Data point 28     | 1.50000 mL | 0.11291 mL | 0.08841 mL | 0.06999 mL | 2.580 | -0.01357 | 0.47607      | 0.00097 | 14.0 s              |
| 32:29.7 | Data point 29     | 1.50000 mL | 0.11291 mL | 0.09374 mL | 0.06999 mL | 2.779 | -0.00359 | 0.57678      | 0.00023 | 10.0 s              |
| 33:05.2 | Data point 30     | 1.50000 mL | 0.11291 mL | 0.09781 mL | 0.06999 mL | 2.960 | -0.00538 | 0.43414      | 0.00040 | 10.0 s              |
| 33:40.7 | Data point 31     | 1.50000 mL | 0.11291 mL | 0.10115 mL | 0.06999 mL | 3.200 | -0.01650 | 0.90031      | 0.00086 | 10.5 s              |
| 34:27.1 | Data point 32     | 1.50000 mL | 0.11291 mL | 0.10362 mL | 0.06999 mL | 3.397 | -0.00830 | 0.30538      | 0.00074 | 10.0 s              |
| 35:02.5 | Data point 33     | 1.50000 mL | 0.11291 mL | 0.10569 mL | 0.06999 mL | 3.587 | -0.01081 | 0.29933      | 0.00098 | 10.0 s              |
| 35:38.0 | Data point 34     | 1.50000 mL | 0.11291 mL | 0.10729 mL | 0.06999 mL | 3.805 | -0.00516 | 0.79057      | 0.00029 | 10.0 s              |
| 36:13.4 | Data point 35     | 1.50000 mL | 0.11291 mL | 0.10842 mL | 0.06999 mL | 4.034 | -0.00755 | 0.89227      | 0.00039 | 10.0 s              |

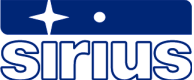

## Assay Events

Sample name: **M11\_octanol**  
Assay name: **pH-metric high logP**  
Assay ID: **18C-09010**  
Filename: **C:\Sirius\_T3\Mehtap\20180309\_exp31\_logP\_T3-2\18C-09010\_M11\_octanol\_pH-metric high logP.t3r**

Experiment start time: **3/9/2018 4:01:24 PM**  
Analyst: **Pion**  
Instrument ID: **T312060**

## Events (continued)

| Time      | Event         | Water      | Acid       | Base       | Octanol    | pH    | dpH/dt   | pH R-squared | pH SD   | dpH/dt time         |
|-----------|---------------|------------|------------|------------|------------|-------|----------|--------------|---------|---------------------|
| 36:48.8   | Data point 36 | 1.50000 mL | 0.11291 mL | 0.10915 mL | 0.06999 mL | 4.284 | -0.01862 | 0.91237      | 0.00096 | 10.0 s              |
| 37:29.3   | Data point 37 | 1.50000 mL | 0.11291 mL | 0.10960 mL | 0.06999 mL | 4.498 | -0.01521 | 0.66710      | 0.00092 | 25.0 s              |
| 38:19.8   | Data point 38 | 1.50000 mL | 0.11291 mL | 0.10988 mL | 0.06999 mL | 4.754 | -0.01754 | 0.82634      | 0.00095 | 20.5 s              |
| 39:10.7   | Data point 39 | 1.50000 mL | 0.11291 mL | 0.11018 mL | 0.06999 mL | 5.255 | -0.01812 | 0.84415      | 0.00097 | 30.0 s              |
| 40:16.4   | Data point 40 | 1.50000 mL | 0.11291 mL | 0.11035 mL | 0.06999 mL | 5.724 | -0.01903 | 0.93383      | 0.00097 | 35.5 s              |
| 41:22.4   | Data point 41 | 1.50000 mL | 0.11291 mL | 0.11042 mL | 0.06999 mL | 6.316 | -0.03790 | 0.98438      | 0.00188 | Timed out at 59.5 s |
| 42:53.0   | Data point 42 | 1.50000 mL | 0.11291 mL | 0.11056 mL | 0.06999 mL | 7.814 | -0.06409 | 0.99645      | 0.00317 | Timed out at 59.5 s |
| 44:28.6   | Data point 43 | 1.50000 mL | 0.11291 mL | 0.11070 mL | 0.06999 mL | 8.652 | -0.02006 | 0.98249      | 0.00100 | 46.0 s              |
| 45:50.3   | Data point 44 | 1.50000 mL | 0.11291 mL | 0.11082 mL | 0.06999 mL | 8.905 | -0.01828 | 0.84297      | 0.00098 | 38.5 s              |
| 46:59.3   | Data point 45 | 1.50000 mL | 0.11291 mL | 0.11091 mL | 0.06999 mL | 9.073 | -0.01775 | 0.86902      | 0.00094 | 27.5 s              |
| 48:28.6   | Data point 46 | 1.50000 mL | 0.17582 mL | 0.11091 mL | 0.21999 mL | 1.960 | -0.00614 | 0.61144      | 0.00039 | 10.0 s              |
| 49:14.9   | Data point 47 | 1.50000 mL | 0.17582 mL | 0.13074 mL | 0.21999 mL | 2.169 | 0.01032  | 0.30311      | 0.00093 | 10.0 s              |
| 49:50.6   | Data point 48 | 1.50000 mL | 0.17582 mL | 0.14341 mL | 0.21999 mL | 2.367 | -0.00532 | 0.40508      | 0.00041 | 10.0 s              |
| 50:26.1   | Data point 49 | 1.50000 mL | 0.17582 mL | 0.15214 mL | 0.21999 mL | 2.563 | -0.00517 | 0.08291      | 0.00089 | 10.5 s              |
| 51:02.2   | Data point 50 | 1.50000 mL | 0.17582 mL | 0.15837 mL | 0.21999 mL | 2.768 | -0.00887 | 0.21333      | 0.00095 | 10.0 s              |
| 51:37.8   | Data point 51 | 1.50000 mL | 0.17582 mL | 0.16289 mL | 0.21999 mL | 2.967 | 0.00295  | 0.02140      | 0.00100 | 10.0 s              |
| 52:13.3   | Data point 52 | 1.50000 mL | 0.17582 mL | 0.16625 mL | 0.21999 mL | 3.200 | -0.00340 | 0.17172      | 0.00041 | 10.0 s              |
| 52:48.8   | Data point 53 | 1.50000 mL | 0.17582 mL | 0.16860 mL | 0.21999 mL | 3.446 | -0.01379 | 0.46424      | 0.00100 | 10.0 s              |
| 53:29.5   | Data point 54 | 1.50000 mL | 0.17582 mL | 0.16992 mL | 0.21999 mL | 3.617 | 0.01450  | 0.85818      | 0.00077 | 33.5 s              |
| 54:43.8   | Data point 55 | 1.50000 mL | 0.17582 mL | 0.17110 mL | 0.21999 mL | 3.827 | -0.00092 | 0.01708      | 0.00035 | 10.5 s              |
| 55:19.9   | Data point 56 | 1.50000 mL | 0.17582 mL | 0.17180 mL | 0.21999 mL | 4.090 | 0.00886  | 0.25159      | 0.00087 | 10.5 s              |
| 56:00.9   | Data point 57 | 1.50000 mL | 0.17582 mL | 0.17222 mL | 0.21999 mL | 4.321 | -0.01922 | 0.95151      | 0.00097 | 11.5 s              |
| 56:37.7   | Data point 58 | 1.50000 mL | 0.17582 mL | 0.17248 mL | 0.21999 mL | 4.556 | -0.01818 | 0.96232      | 0.00092 | 21.5 s              |
| 57:29.8   | Data point 59 | 1.50000 mL | 0.17582 mL | 0.17277 mL | 0.21999 mL | 5.036 | -0.00086 | 0.00356      | 0.00071 | 14.0 s              |
| 58:19.3   | Data point 60 | 1.50000 mL | 0.17582 mL | 0.17288 mL | 0.21999 mL | 5.357 | -0.01461 | 0.57206      | 0.00095 | 16.0 s              |
| 59:10.9   | Data point 61 | 1.50000 mL | 0.17582 mL | 0.17295 mL | 0.21999 mL | 5.549 | -0.01615 | 0.98210      | 0.00080 | 29.5 s              |
| 1:00:11.1 | Data point 62 | 1.50000 mL | 0.17582 mL | 0.17307 mL | 0.21999 mL | 6.690 | -0.09840 | 0.99748      | 0.00486 | Timed out at 59.5 s |
| 1:01:41.6 | Data point 63 | 1.50000 mL | 0.17582 mL | 0.17319 mL | 0.21999 mL | 7.526 | -0.12365 | 0.99119      | 0.00614 | Timed out at 59.5 s |
| 1:03:12.0 | Data point 64 | 1.50000 mL | 0.17582 mL | 0.17324 mL | 0.21999 mL | 7.651 | -0.08733 | 0.99550      | 0.00433 | Timed out at 59.5 s |
| 1:04:42.5 | Data point 65 | 1.50000 mL | 0.17582 mL | 0.17328 mL | 0.21999 mL | 7.837 | -0.13623 | 0.43667      | 0.01018 | Timed out at 59.5 s |
| 1:06:18.2 | Data point 66 | 1.50000 mL | 0.17582 mL | 0.17335 mL | 0.21999 mL | 8.021 | -0.06575 | 0.99623      | 0.00325 | Timed out at 59.5 s |
| 1:07:53.8 | Data point 67 | 1.50000 mL | 0.17582 mL | 0.17345 mL | 0.21999 mL | 8.434 | -0.11867 | 0.41261      | 0.00912 | Timed out at 59.5 s |
| 1:09:29.4 | Data point 68 | 1.50000 mL | 0.17582 mL | 0.17361 mL | 0.21999 mL | 8.870 | -0.01721 | 0.79761      | 0.00095 | 21.0 s              |
| 1:10:26.0 | Data point 69 | 1.50000 mL | 0.17582 mL | 0.17373 mL | 0.21999 mL | 9.041 | -0.01672 | 0.74463      | 0.00096 | 15.5 s              |
| 1:10:50.6 | Assay volumes | 1.50000 mL | 0.17582 mL | 0.17373 mL | 0.21999 mL |       |          |              |         |                     |

Sample name: **M11\_octanol**  
 Assay name: **pH-metric high logP**  
 Assay ID: **18C-09010**  
 Filename: **C:\Sirius\_T3\Mehtap\20180309\_exp31\_logP\_T3-2\18C-09010\_M11\_octanol\_pH-metric high logP.t3r**

Experiment start time: **3/9/2018 4:01:24 PM**  
 Analyst: **Pion**  
 Instrument ID: **T312060**

## Assay Settings

| Setting                             | Value              | Original Value | Date/Time changed | Imported from |
|-------------------------------------|--------------------|----------------|-------------------|---------------|
| <b>General Settings</b>             |                    |                |                   |               |
| Analyst name                        | Pion               |                |                   |               |
| <b>Standard Experiment Settings</b> |                    |                |                   |               |
| Number of titrations                | 3                  |                |                   |               |
| Minimum pH                          | 2.000              |                |                   |               |
| Maximum pH                          | 9.000              |                |                   |               |
| pH step between points of           | 0.200              |                |                   |               |
| Minimum titrant addition            | 0.00002 mL         |                |                   |               |
| Maximum titrant addition            | 0.10000 mL         |                |                   |               |
| Argon flow rate                     | 100%               |                |                   |               |
| Start titration using               | Cautious pH adjust |                |                   |               |
| <b>Advanced General Settings</b>    |                    |                |                   |               |
| Detect turbidity using              | None               |                |                   |               |
| Collect turbidity sensor data       | No                 |                |                   |               |
| Collect UV spectra                  | No                 |                |                   |               |
| Stir after titrant addition for     | 5 seconds          |                |                   |               |
| For titrant addition, stir at       | 10%                |                |                   |               |
| <b>Titration Pre-Dose</b>           |                    |                |                   |               |
| Titration pre-dose                  | None               |                |                   |               |
| <b>Assay Medium</b>                 |                    |                |                   |               |
| ISA water volume                    | 1.50 mL            |                |                   |               |
| Water added                         | Automatic          |                |                   |               |
| Partition solvent type              | Octanol            |                |                   |               |
| Partition volume                    | 0.020 mL           |                |                   |               |
| Partition solvent added             | Automatic          |                |                   |               |
| After partition addition, stir for  | 1 seconds          |                |                   |               |
| <b>Sample Sonication</b>            |                    |                |                   |               |
| Sonicate                            | Yes                |                |                   |               |
| Adjust pH for sonication            | No                 |                |                   |               |
| Sonicate for                        | 60 seconds         |                |                   |               |
| After sonication stir for           | 5 seconds          |                |                   |               |
| <b>Sample Dissolution</b>           |                    |                |                   |               |
| Perform a dissolution stage         | Yes                |                |                   |               |
| Adjust and hold pH for dissolution  | To start pH        |                |                   |               |
| Stir to dissolve for                | 120 seconds        |                |                   |               |
| For dissolution, stir at            | 10%                |                |                   |               |
| <b>Carbonate purge</b>              |                    |                |                   |               |
| Perform a carbonate purge           | No                 |                |                   |               |
| <b>Temperature Control</b>          |                    |                |                   |               |
| Wait for temperature                | Yes                |                |                   |               |
| Required start temperature          | 25.0°C             |                |                   |               |
| Acceptable deviation                | 0.5°C              |                |                   |               |
| Time to wait                        | 60 seconds         |                |                   |               |
| Stir speed of                       | 50%                |                |                   |               |
| <b>Titration 1</b>                  |                    |                |                   |               |
| Titrate from                        | Low to high pH     |                |                   |               |
| Adjust to start pH                  | Yes                |                |                   |               |
| After pH adjust stir for            | 30 seconds         |                |                   |               |
| Stir to allow partitioning for      | 15 seconds         |                |                   |               |
| Stirrer speed for partitioning      | 50%                |                |                   |               |
| <b>Titration 2</b>                  |                    |                |                   |               |
| Titrate from                        | Low to high pH     |                |                   |               |
| Add additional water                | 0.00 mL            |                |                   |               |
| Additional partition solvent volume | 0.050 mL           |                |                   |               |
| Additional partition solvent added  | Automatic          |                |                   |               |
| After pH adjust stir for            | 30 seconds         |                |                   |               |
| Stir to allow partitioning for      | 15 seconds         |                |                   |               |
| Stirrer speed for partitioning      | 55%                |                |                   |               |



Sample name: **M11\_octanol** Experiment start time: **3/9/2018 4:01:24 PM**  
 Assay name: **pH-metric high logP** Analyst: **Pion**  
 Assay ID: **18C-09010** Instrument ID: **T312060**  
 Filename: **C:\Sirius\_T3\Mehtap\20180309\_exp31\_logP\_T3-2\18C-09010\_M11\_octanol\_pH-metric high logP.t3r**

## Assay Settings (continued)

| Setting                             | Value          | Original Value | Date/Time changed | Imported from |
|-------------------------------------|----------------|----------------|-------------------|---------------|
| <b>Titration 3</b>                  |                |                |                   |               |
| Titrate from                        | Low to high pH |                |                   |               |
| Add additional water                | 0.00 mL        |                |                   |               |
| Additional partition solvent volume | 0.150 mL       |                |                   |               |
| Additional partition solvent added  | Automatic      |                |                   |               |
| After pH adjust stir for            | 30 seconds     |                |                   |               |
| Stir to allow partitioning for      | 15 seconds     |                |                   |               |
| Stirrer speed for partitioning      | 60%            |                |                   |               |
| <b>Data Point Stability</b>         |                |                |                   |               |
| Stir during data point collection   | No             |                |                   |               |
| Delay before data point collection  | 0 seconds      |                |                   |               |
| Number of points to average         | 20 points      |                |                   |               |
| Time interval between points        | 0.50 seconds   |                |                   |               |
| Required maximum standard deviation | 0.00100 dpH/dt |                |                   |               |
| Stability timeout after             | 60 seconds     |                |                   |               |

## Calibration Settings

| Setting                   | Value  | Date/Time changed   | Imported from             |
|---------------------------|--------|---------------------|---------------------------|
| Four-Plus alpha           | 0.102  | 3/9/2018 4:01:24 PM | C:\Sirius_T3\HCl18C09.t3r |
| Four-Plus S               | 0.9967 | 3/9/2018 4:01:24 PM | C:\Sirius_T3\HCl18C09.t3r |
| Four-Plus jH              | 1.2    | 3/9/2018 4:01:24 PM | C:\Sirius_T3\HCl18C09.t3r |
| Four-Plus jOH             | 0.0    | 3/9/2018 4:01:24 PM | C:\Sirius_T3\HCl18C09.t3r |
| Base concentration factor | 1.000  | 3/9/2018 4:01:24 PM | C:\Sirius_T3\KOH18B27.t3r |
| Acid concentration factor | 1.000  | 3/9/2018 4:01:24 PM | C:\Sirius_T3\HCl18C09.t3r |

## Instrument Settings

| Setting              | Value                      | Batch Id    | Install date           |
|----------------------|----------------------------|-------------|------------------------|
| Instrument owner     | Merck                      |             |                        |
| Instrument ID        | T312060                    |             |                        |
| Instrument type      | T3 Simulator               |             |                        |
| Software version     | 1.1.3.0                    |             |                        |
| Dispenser module     |                            | T3DM1200361 | 3/31/2009 6:24:52 AM   |
| Dispenser 0          | Water                      |             | 3/31/2009 6:25:05 AM   |
| Syringe volume       | 2.5 mL                     |             |                        |
| Firmware version     | 1.2.1(r2)                  |             |                        |
| Titrant              | Water (0.15 M KCl)         | 02-06-2018  | 2/27/2018 11:05:59 AM  |
| Dispenser 2          | Acid                       |             | 3/31/2009 6:25:11 AM   |
| Syringe volume       | 0.5 mL                     |             |                        |
| Firmware version     | 1.2.1(r2)                  |             |                        |
| Titrant              | Acid (0.5 M HCl)           | 02-27-2018  | 2/27/2018 11:27:22 AM  |
| Dispenser 1          | Base                       |             | 3/31/2009 6:25:21 AM   |
| Syringe volume       | 0.5 mL                     |             |                        |
| Firmware version     | 1.2.1(r2)                  |             |                        |
| Titrant              | Base (0.5 M KOH)           | 9/22/2017   | 2/27/2018 11:21:22 AM  |
| Dispenser 5          | Cosolvent                  |             | 3/31/2009 6:26:24 AM   |
| Syringe volume       | 2.5 mL                     |             |                        |
| Firmware version     | 1.2.1(r2)                  |             |                        |
| Distribution valve 5 | Distribution Valve         |             | 3/31/2009 6:28:19 AM   |
| Firmware version     | 1.1.3                      |             |                        |
| Port A               | Methanol (80%, 0.15 M KCl) | 02-08-2018  | 3/6/2018 10:28:59 AM   |
| Port B               | Cyclohexane                | 11-01-17    | 2/27/2018 11:37:57 AM  |
| Dispenser 3          | Buffer                     |             | 8/3/2010 6:05:16 AM    |
| Syringe volume       | 0.5 mL                     |             |                        |
| Firmware version     | 1.2.1(r2)                  |             |                        |
| Titrant              | Dodecane                   | 2018/01/31  | 2/28/2018 11:18:04 AM  |
| Dispenser 6          | Octanol                    |             | 10/22/2010 11:52:43 AM |



Sample name: **M11\_octanol**  
 Assay name: **pH-metric high logP**  
 Assay ID: **18C-09010**  
 Filename: **C:\Sirius\_T3\Mehtap\20180309\_exp31\_logP\_T3-2\18C-09010\_M11\_octanol\_pH-metric high logP.t3r**

Experiment start time: **3/9/2018 4:01:24 PM**  
 Analyst: **Pion**  
 Instrument ID: **T312060**

## Instrument Settings (continued)

| Setting                                   | Value                      | Batch Id    | Install date           |
|-------------------------------------------|----------------------------|-------------|------------------------|
| Syringe volume                            | 0.5 mL                     |             |                        |
| Firmware version                          | 1.2.1(r2)                  |             |                        |
| Titration                                 | Octanol                    | 01-31-2018  | 2/27/2018 10:59:35 AM  |
| Titration                                 |                            | T3TM1200161 | 3/31/2009 6:24:17 AM   |
| Horizontal axis firmware version          | 1.17 AI1DI2DO2 Stepper 2   |             |                        |
| Vertical axis firmware version            | 1.17 AI1DI2DO2 Stepper 2   |             |                        |
| Chassis I/O firmware version              | 1.11 AI1DI0DO4 Norgren I/O |             |                        |
| Probe I/O firmware version                | 1.1.1                      |             |                        |
| Electrode                                 | T3 Electrode               | T3E0923     | 1/23/2018 3:01:00 PM   |
| E0 calibration                            | +6.40 mV                   |             | 3/9/2018 4:01:52 PM    |
| Filling solution                          | 3M KCl                     | KCL097      | 3/9/2018 11:05:42 AM   |
| Liquids                                   |                            |             |                        |
| Wash 1                                    | 50% IPA:50% Water          |             | 3/9/2018 11:04:22 AM   |
| Wash 2                                    | 0.5% Triton X-100 in H2O   |             | 3/9/2018 11:04:25 AM   |
| Buffer position 1                         | pH7 Wash                   |             | 3/9/2018 11:04:27 AM   |
| Buffer position 2                         | pH 7                       |             | 3/9/2018 11:04:30 AM   |
| Storage position                          |                            |             | 3/9/2018 11:05:04 AM   |
| Wash water                                | 5.3e+003 mL                | 02-27-2018  | 2/27/2018 10:54:39 AM  |
| Waste                                     | 1e+004 mL                  |             | 11/28/2017 11:36:29 AM |
| Temperature controller                    |                            |             | 8/5/2010 7:35:13 AM    |
| Turbidity detector                        |                            |             | 3/31/2009 6:24:45 AM   |
| Spectrometer                              |                            | 074811      | 11/23/2010 12:22:28 PM |
| Dip probe                                 |                            | 10196       |                        |
| Wavelength coefficient A0                 | 183.333                    |             |                        |
| Wavelength coefficient A1                 | 2.21568                    |             |                        |
| Wavelength coefficient A2                 | -0.000289308               |             |                        |
| Total lamp lit time                       | 123:16:41                  |             | 11/23/2010 12:22:28 PM |
| Calibrated on                             | 2/27/2018 11:40:38 AM      |             |                        |
| Integration time                          | 40                         |             |                        |
| Scans averaged                            | 10                         |             |                        |
| Autoloader                                |                            | T3AL1200345 | 11/10/2015 10:34:13 AM |
| Left-right axis firmware version          | 1.17 AI1DI2DO2 Stepper 2   |             |                        |
| Front-back axis firmware version          | 1.17 AI1DI2DO2 Stepper 2   |             |                        |
| Vertical axis firmware version            | 1.17 AI1DI2DO2 Stepper 2   |             |                        |
| Chassis I/O firmware version              | 1.11 AI1DI0DO4 Norgren I/O |             |                        |
| Configuration                             |                            |             |                        |
| Alternate titration position              | Titration position         |             |                        |
| Alternate reference position              | Reference position         |             |                        |
| Maximum standard vial volume              | 3.50 mL                    |             |                        |
| Maximum alternate vial volume             | 25.00 mL                   |             |                        |
| Automatic action idle period              | 5 minute(s)                |             |                        |
| Titration tube volume                     | 1.3 mL                     |             |                        |
| Syringe flush count                       | 3.50                       |             |                        |
| Flowing wash pump volume                  | 20.0 mL                    |             |                        |
| Flowing wash stir duration                | 5 s                        |             |                        |
| Flowing wash stir speed                   | 30%                        |             |                        |
| Solvent wash stir duration                | 5 s                        |             |                        |
| Solvent wash stir speed                   | 30%                        |             |                        |
| Surfactant wash stir duration             | 5 s                        |             |                        |
| Surfactant wash stir speed                | 30%                        |             |                        |
| E0 calibration minimum number of points   | 10                         |             |                        |
| E0 calibration maximum standard deviation | 0.01500                    |             |                        |
| E0 calibration timeout period             | 60 s                       |             |                        |
| E0 calibration stir duration              | 5 s                        |             |                        |
| E0 calibration preparation stir speed     | 30%                        |             |                        |
| E0 calibration buffer wash stir duration  | 5 s                        |             |                        |
| E0 calibration buffer wash stir speed     | 30%                        |             |                        |
| E0 calibration reading stir speed         | 0%                         |             |                        |



## Assay Settings

Sample name: **M11\_octanol** Experiment start time: **3/9/2018 4:01:24 PM**  
Assay name: **pH-metric high logP** Analyst: **Pion**  
Assay ID: **18C-09010** Instrument ID: **T312060**  
Filename: **C:\Sirius\_T3\Mehtap\20180309\_exp31\_logP\_T3-2\18C-09010\_M11\_octanol\_pH-metric high logP.t3r**

### Instrument Settings (continued)

| Setting                                     | Value   | Batch Id | Install date |
|---------------------------------------------|---------|----------|--------------|
| Spectrometer calibration stir duration      | 5 s     |          |              |
| Spectrometer calibration stir speed         | 30%     |          |              |
| Spectrometer calibration wash pump volume   | 20.0 mL |          |              |
| Spectrometer calibration wash stir duration | 5 s     |          |              |
| Spectrometer calibration wash stir speed    | 30%     |          |              |
| Overhead dispense height                    | 10000   |          |              |

### Refinement Settings

| Setting                        | Value    | Default value |
|--------------------------------|----------|---------------|
| Turbidity detection method     | None     | None          |
| Turbidity wavelength to assess | 500.0 nm | 500.0 nm      |
| Turbidity maximum absorbance   | 0.100    | 0.100         |
| Turbidity probe threshold      | 50.00    | 50.00         |
