# Supplementary material for: Octanol-water partition coefficient measurements for the SAMPL6 Blind Prediction Challenge
Source: bioRxiv or medRxiv preprint supplement (doi:10.1101/757393), 2019-12-02
Supplement: Supplementary file [file media-2.zip]

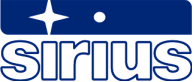

Sample name: **M08\_octanol** Experiment start time: **3/2/2018 8:29:22 PM**  
Assay name: **pH-metric high logP** Analyst: **Pion**  
Assay ID: **18C-02009** Instrument ID: **T312060**  
Filename: **C:\Sirius\_T3\Mehtap\20180302\_exp29\_logP\_T3-2\18C-02009\_M08\_octanol\_pH-metric high logP.t3r**

**pH-metric Result**

logP (neutral XH) 3.16 ±0.01 (n=50)  
logP (X -) 0.23 ±0.03 (n=50)

**18C-02009 Points 2 to 38**

M08\_octanol concentration factor 1.095  
Carbonate 0.0863 mM  
Acidity error -0.76941 mM

**18C-02009 Points 39 to 63**

M08\_octanol concentration factor 0.769  
Carbonate 0.0001 mM  
Acidity error -0.70585 mM

**18C-02009 Points 64 to 92**

M08\_octanol concentration factor 0.703  
Carbonate 0.2882 mM  
Acidity error -0.43720 mM

**Warnings and errors**

Errors None  
Warnings None

**Sample logD and percent species**

| pH     | M08_octanol<br>logD | M08_octanol<br>M08_octanolH | M08_octanol<br>M08_octanol | M08_octanol<br>M08_octanolH* | M08_octanol<br>M08_octanol* | Comment    |
|--------|---------------------|-----------------------------|----------------------------|------------------------------|-----------------------------|------------|
| 1.000  | 3.16                | 0.07 %                      | 0.00 %                     | 99.93 %                      | 0.00 %                      | Stomach pH |
| 1.200  | 3.16                | 0.07 %                      | 0.00 %                     | 99.93 %                      | 0.00 %                      |            |
| 2.000  | 3.16                | 0.07 %                      | 0.00 %                     | 99.93 %                      | 0.00 %                      |            |
| 3.000  | 3.13                | 0.07 %                      | 0.00 %                     | 99.92 %                      | 0.01 %                      |            |
| 4.000  | 2.95                | 0.07 %                      | 0.04 %                     | 99.82 %                      | 0.07 %                      |            |
| 5.000  | 2.32                | 0.07 %                      | 0.41 %                     | 98.81 %                      | 0.71 %                      | Blood pH   |
| 6.000  | 1.40                | 0.06 %                      | 3.75 %                     | 89.77 %                      | 6.42 %                      |            |
| 6.500  | 0.97                | 0.05 %                      | 9.73 %                     | 73.58 %                      | 16.64 %                     |            |
| 7.000  | 0.61                | 0.03 %                      | 19.59 %                    | 46.86 %                      | 33.52 %                     |            |
| 7.400  | 0.43                | 0.02 %                      | 27.29 %                    | 25.99 %                      | 46.69 %                     |            |
| 8.000  | 0.29                | 0.01 %                      | 33.90 %                    | 8.11 %                       | 57.99 %                     |            |
| 9.000  | 0.24                | 0.00 %                      | 36.57 %                    | 0.87 %                       | 62.56 %                     |            |
| 10.000 | 0.23                | 0.00 %                      | 36.86 %                    | 0.09 %                       | 63.05 %                     |            |
| 11.000 | 0.23                | 0.00 %                      | 36.89 %                    | 0.01 %                       | 63.10 %                     |            |
| 12.000 | 0.23                | 0.00 %                      | 36.89 %                    | 0.00 %                       | 63.11 %                     |            |

Sample name: **M08\_octanol**  
 Assay name: **pH-metric high logP**  
 Assay ID: **18C-02009**  
 Filename: **C:\Sirius\_T3\Mehtap\20180302\_exp29\_logP\_T3-2\18C-02009\_M08\_octanol\_pH-metric high logP.t3r**

Experiment start time: **3/2/2018 8:29:22 PM**  
 Analyst: **Pion**  
 Instrument ID: **T312060**

## Graphs

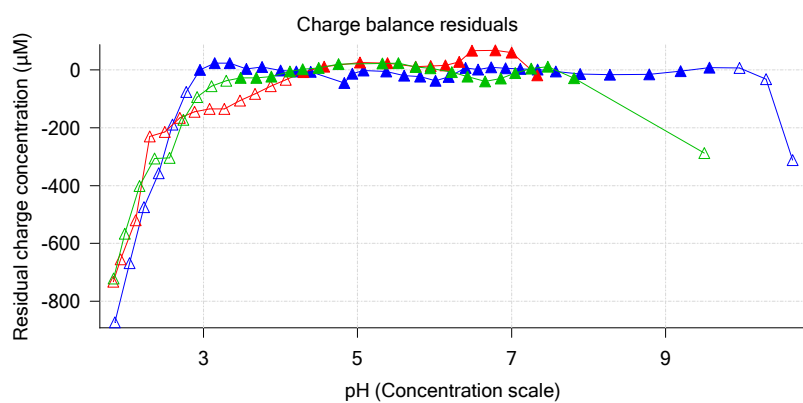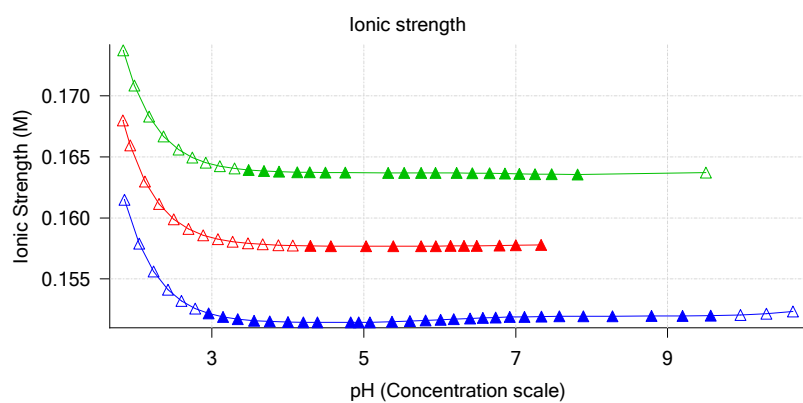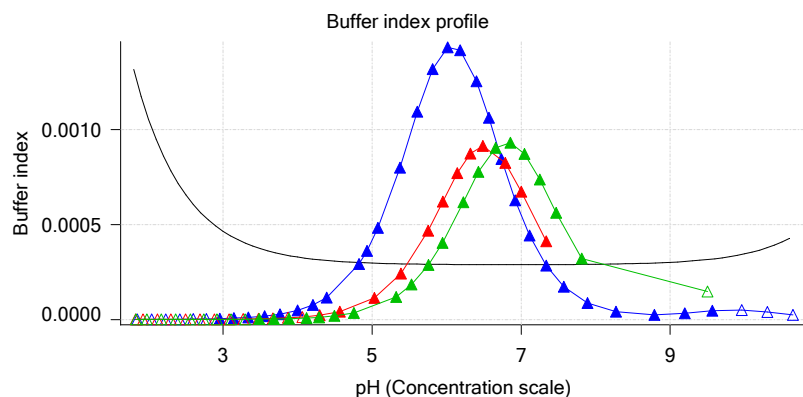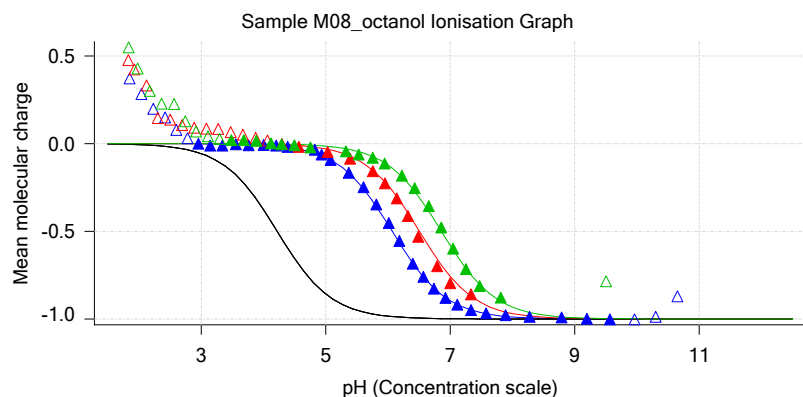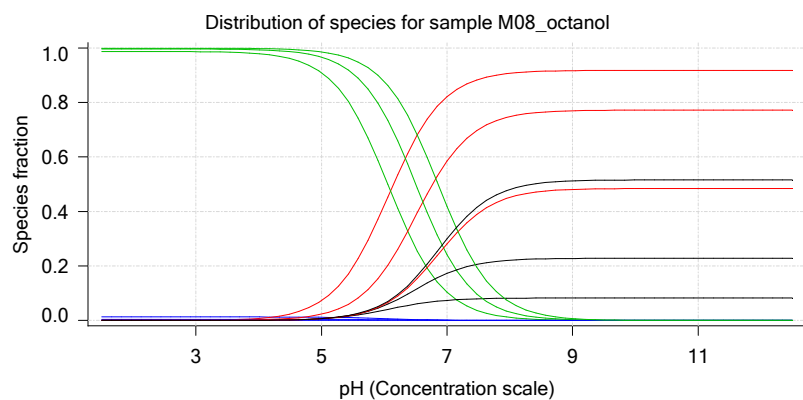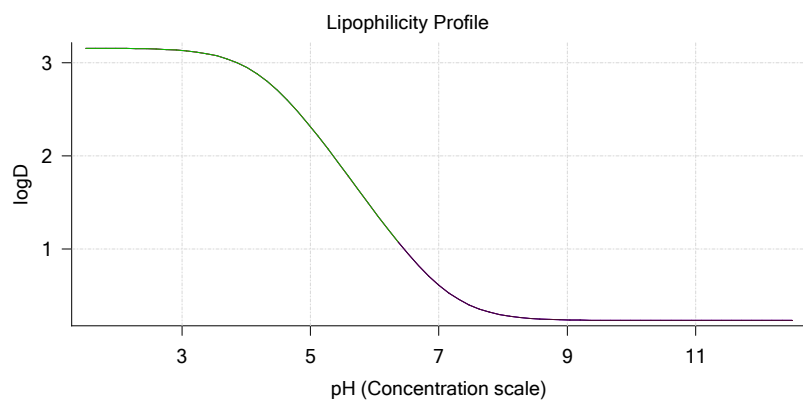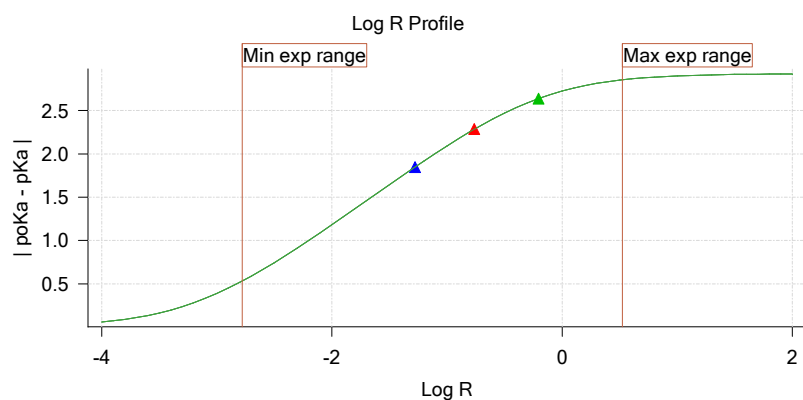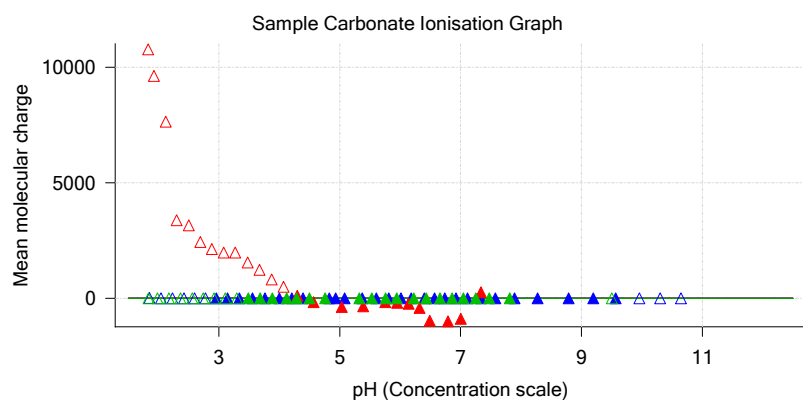

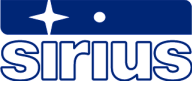

Sample name: **M08\_octanol**  
Assay name: **pH-metric high logP**  
Assay ID: **18C-02009**  
Filename: **C:\Sirius\_T3\Mehtap\20180302\_exp29\_logP\_T3-2\18C-02009\_M08\_octanol\_pH-metric high logP.t3r**

Experiment start time: **3/2/2018 8:29:22 PM**  
Analyst: **Pion**  
Instrument ID: **T312060**

## Graphs (continued)

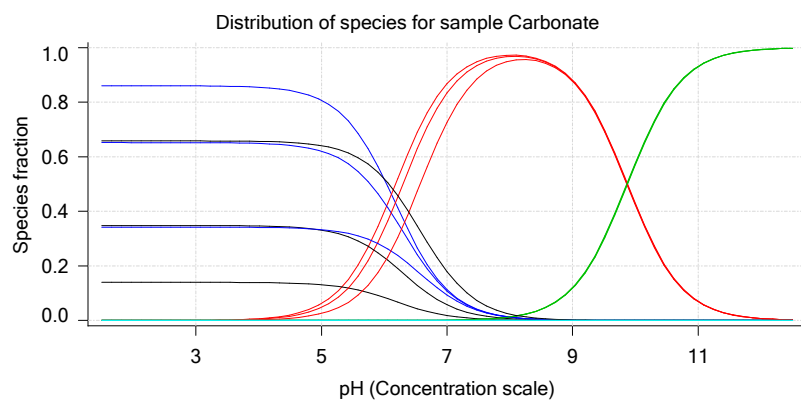

Sample name: **M08\_octanol**  
 Assay name: **pH-metric high logP**  
 Assay ID: **18C-02009**  
 Filename: **C:\Sirius\_T3\Mehtap\20180302\_exp29\_logP\_T3-2\18C-02009\_M08\_octanol\_pH-metric high logP.t3r**

Experiment start time: **3/2/2018 8:29:22 PM**  
 Analyst: **Pion**  
 Instrument ID: **T312060**

## pH-metric high logP Titration 1 of 3 18C-02009 Points 2 to 38

### Overall results

RMSD 0.094  
 Average ionic strength 0.152 M  
 Average temperature 25.0°C  
 Partition ratio 0.0526 : 1  
 Analyte concentration range 2033.3 µM to 2105.6 µM  
 Total points considered 28 of 37

### Warnings and errors

Errors None  
 Warnings One or more logP values out of range

### Four-Plus parameters

Alpha 0.111 3/2/2018 8:29:22 PM C:\Sirius\_T3\HCl18C02.t3r  
 S 0.9988 3/2/2018 8:29:22 PM C:\Sirius\_T3\HCl18C02.t3r  
 jH 1.0 3/2/2018 8:29:22 PM C:\Sirius\_T3\HCl18C02.t3r  
 jOH -0.8 3/2/2018 8:29:22 PM C:\Sirius\_T3\HCl18C02.t3r

### Titrants

0.50 M HCl 0.999058 3/2/2018 8:29:22 PM C:\Sirius\_T3\HCl18C02.t3r  
 0.50 M KOH 0.999845 3/2/2018 8:29:22 PM C:\Sirius\_T3\KOH18B27.t3r

### Sample

M08\_octanol concentration factor 1.095  
 Acid pKa 1 4.22  
 logP (neutral XH) 3.13  
 logP (X-) -5.22

### Sample graphs

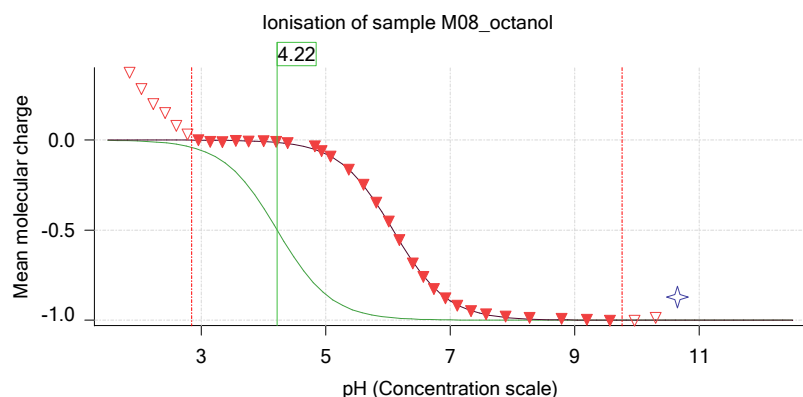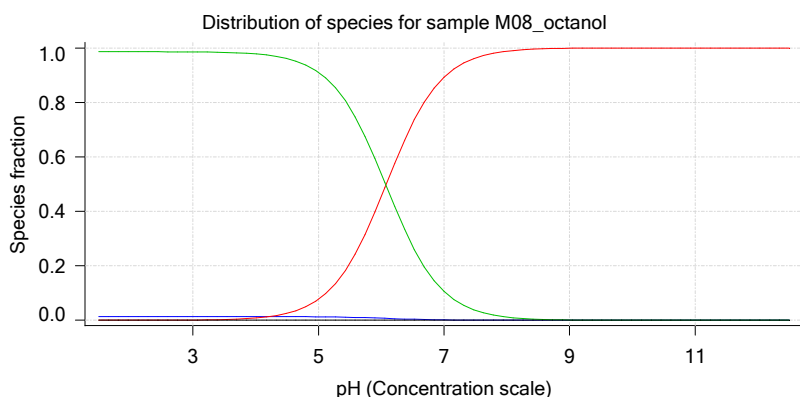

Sample name: **M08\_octanol**  
 Assay name: **pH-metric high logP**  
 Assay ID: **18C-02009**  
 Filename: **C:\Sirius\_T3\Mehtap\20180302\_exp29\_logP\_T3-2\18C-02009\_M08\_octanol\_pH-metric high logP.t3r**

Experiment start time: **3/2/2018 8:29:22 PM**  
 Analyst: **Pion**  
 Instrument ID: **T312060**

## Sample graphs (continued)

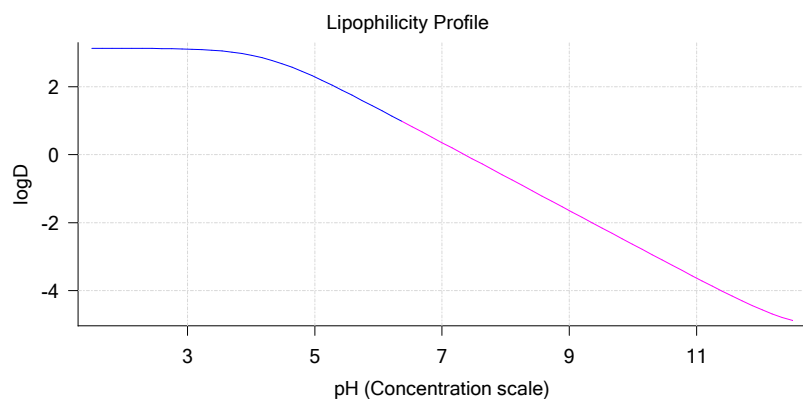

## Sample logD and percent species

| pH     | M08_octanol<br>logD | M08_octanol<br>M08_octanolH | M08_octanol<br>M08_octanolH | M08_octanol<br>M08_octanolH* | M08_octanol<br>M08_octanol* | Comment |
|--------|---------------------|-----------------------------|-----------------------------|------------------------------|-----------------------------|---------|
| 1.000  | 3.13                | 1.38 %                      | 0.00 %                      | 98.62 %                      | 0.00 %                      |         |
| 1.200  | 3.13                | 1.38 %                      | 0.00 %                      | 98.62 %                      | 0.00 %                      |         |
| 2.000  | 3.13                | 1.38 %                      | 0.01 %                      | 98.61 %                      | 0.00 %                      |         |
| 3.000  | 3.11                | 1.38 %                      | 0.08 %                      | 98.54 %                      | 0.00 %                      |         |
| 4.000  | 2.93                | 1.37 %                      | 0.82 %                      | 97.81 %                      | 0.00 %                      |         |
| 5.000  | 2.29                | 1.27 %                      | 7.67 %                      | 91.06 %                      | 0.00 %                      |         |
| 6.000  | 1.35                | 0.75 %                      | 45.38 %                     | 53.86 %                      | 0.00 %                      |         |
| 6.500  | 0.85                | 0.38 %                      | 72.43 %                     | 27.19 %                      | 0.00 %                      |         |
| 7.000  | 0.35                | 0.15 %                      | 89.26 %                     | 10.59 %                      | 0.00 %                      |         |
| 7.400  | -0.05               | 0.06 %                      | 95.43 %                     | 4.51 %                       | 0.00 %                      |         |
| 8.000  | -0.65               | 0.02 %                      | 98.81 %                     | 1.17 %                       | 0.00 %                      |         |
| 9.000  | -1.65               | 0.00 %                      | 99.88 %                     | 0.12 %                       | 0.00 %                      |         |
| 10.000 | -2.65               | 0.00 %                      | 99.99 %                     | 0.01 %                       | 0.00 %                      |         |
| 11.000 | -3.64               | 0.00 %                      | 100.00 %                    | 0.00 %                       | 0.00 %                      |         |
| 12.000 | -4.54               | 0.00 %                      | 100.00 %                    | 0.00 %                       | 0.00 %                      |         |

## Carbonate and acidity

 Carbonate 0.086 mM  
 Acidity error -0.769 mM

## Other graphs

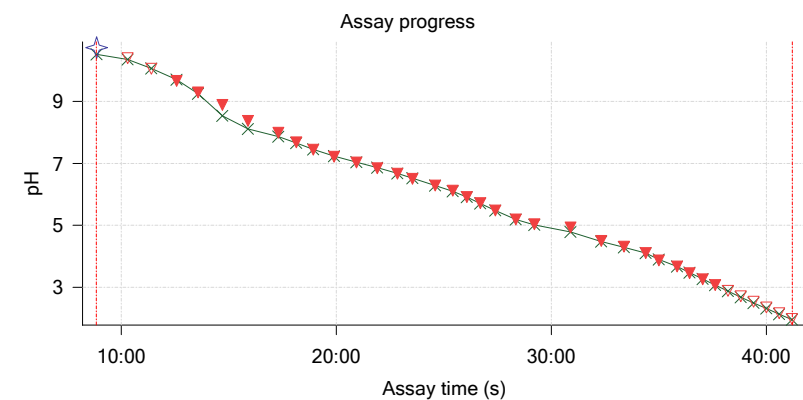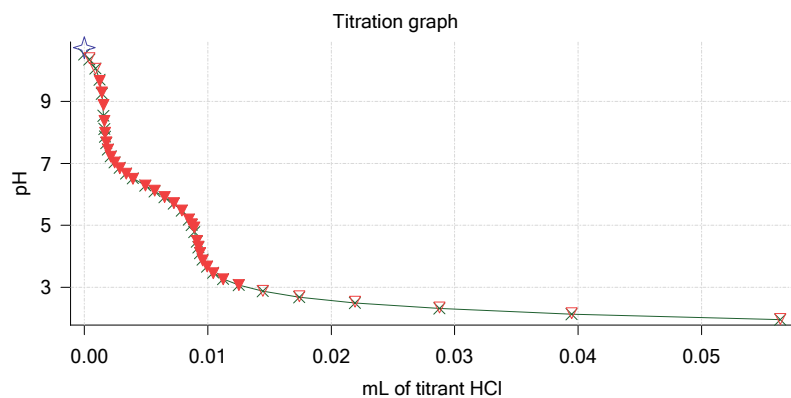

Sample name: **M08\_octanol**  
 Assay name: **pH-metric high logP**  
 Assay ID: **18C-02009**  
 Filename: **C:\Sirius\_T3\Mehtap\20180302\_exp29\_logP\_T3-2\18C-02009\_M08\_octanol\_pH-metric high logP.t3r**

Experiment start time: **3/2/2018 8:29:22 PM**  
 Analyst: **Pion**  
 Instrument ID: **T312060**

## Other graphs (continued)

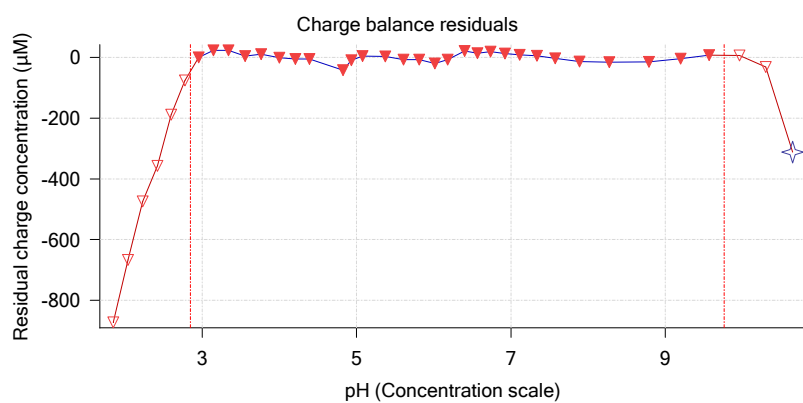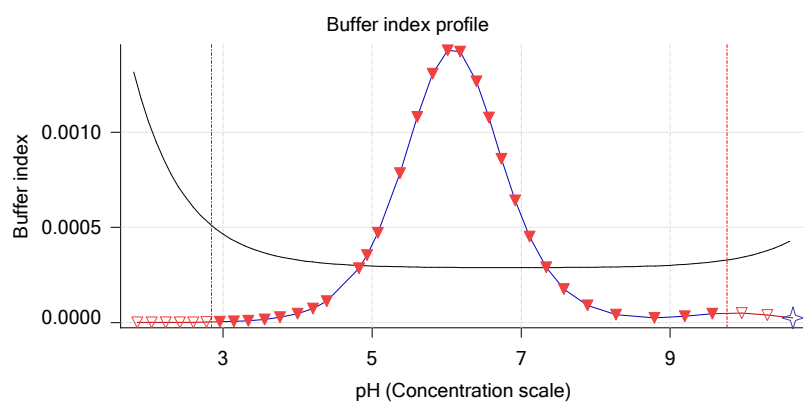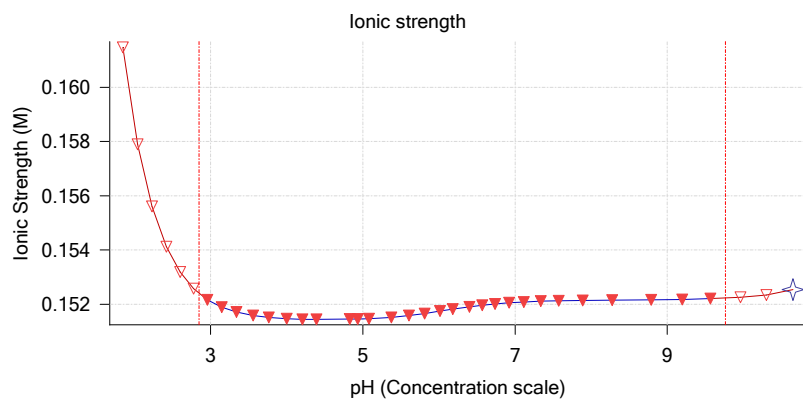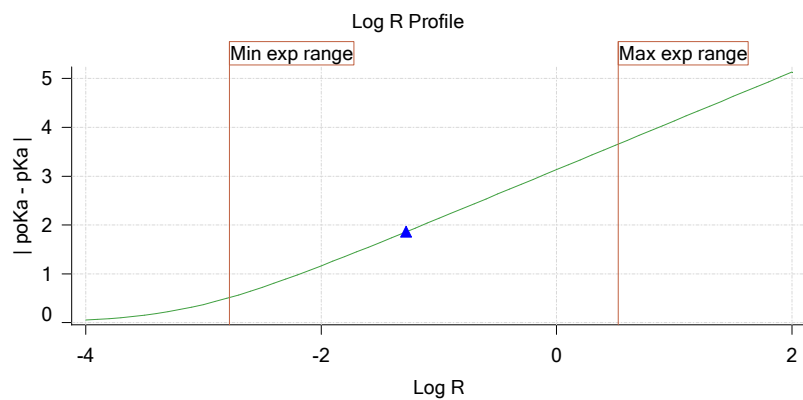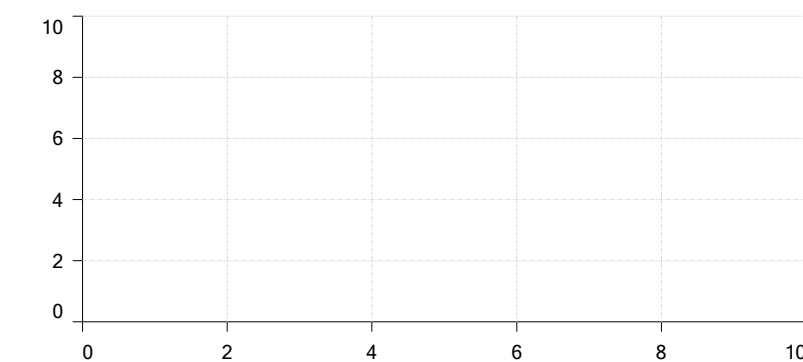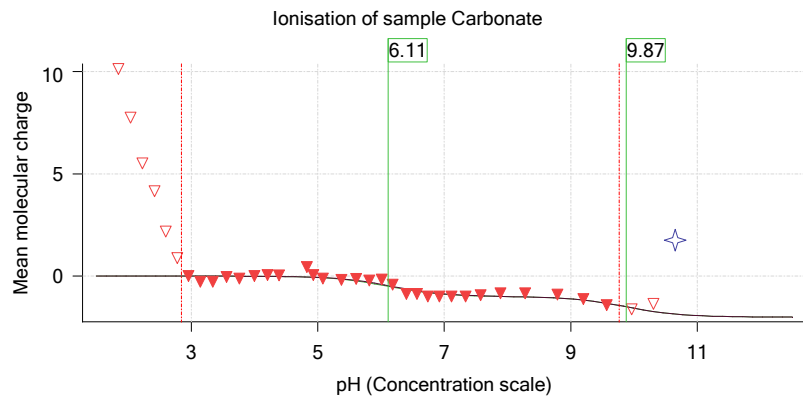

Sample name: **M08\_octanol**  
 Assay name: **pH-metric high logP**  
 Assay ID: **18C-02009**  
 Filename: **C:\Sirius\_T3\Mehtap\20180302\_exp29\_logP\_T3-2\18C-02009\_M08\_octanol\_pH-metric high logP.t3r**

Experiment start time: **3/2/2018 8:29:22 PM**  
 Analyst: **Pion**  
 Instrument ID: **T312060**

pH-metric high logP Titration 2 of 3 18C-02009 Points 39 to 63

## Overall results

RMSD 0.061  
 Average ionic strength 0.158 M  
 Average temperature 25.0°C  
 Partition ratio 0.1728 : 1  
 Analyte concentration range 1712.1 µM to 1763.3 µM  
 Total points considered 12 of 25

## Warnings and errors

Errors None  
 Warnings One or more logP values out of range

## Four-Plus parameters

Alpha 0.111 3/2/2018 8:29:22 PM C:\Sirius\_T3\HCl18C02.t3r  
 S 0.9988 3/2/2018 8:29:22 PM C:\Sirius\_T3\HCl18C02.t3r  
 jH 1.0 3/2/2018 8:29:22 PM C:\Sirius\_T3\HCl18C02.t3r  
 jOH -0.8 3/2/2018 8:29:22 PM C:\Sirius\_T3\HCl18C02.t3r

## Titrants

0.50 M HCl 0.999058 3/2/2018 8:29:22 PM C:\Sirius\_T3\HCl18C02.t3r  
 0.50 M KOH 0.999845 3/2/2018 8:29:22 PM C:\Sirius\_T3\KOH18B27.t3r

## Sample

M08\_octanol concentration factor 0.769  
 Acid pKa 1 4.22  
 logP (neutral XH) 3.00  
 logP (X-) -5.22

## Sample graphs

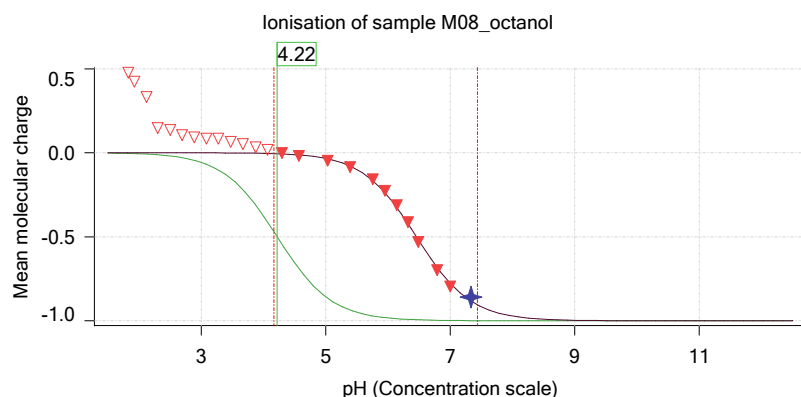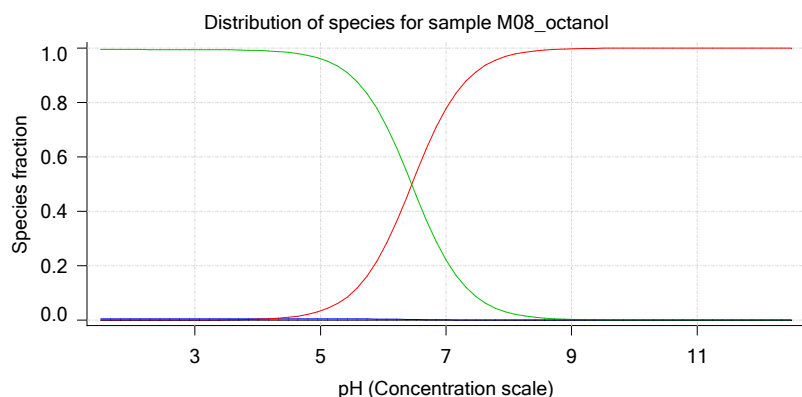

Sample name: **M08\_octanol**  
 Assay name: **pH-metric high logP**  
 Assay ID: **18C-02009**  
 Filename: **C:\Sirius\_T3\Mehtap\20180302\_exp29\_logP\_T3-2\18C-02009\_M08\_octanol\_pH-metric high logP.t3r**

Experiment start time: **3/2/2018 8:29:22 PM**  
 Analyst: **Pion**  
 Instrument ID: **T312060**

## Sample graphs (continued)

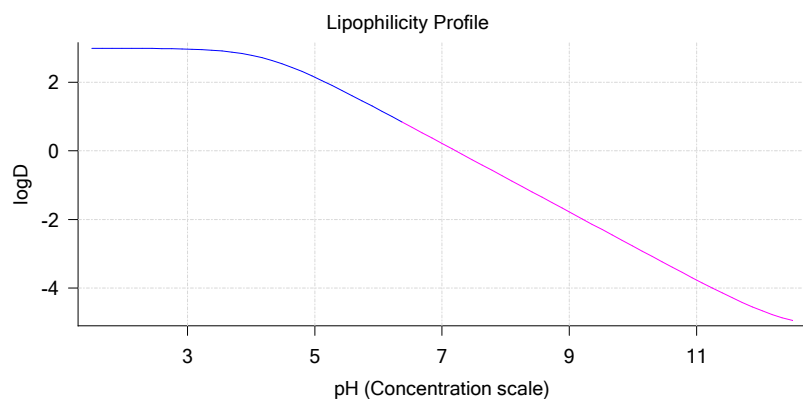

## Sample logD and percent species

| pH     | M08_octanol<br>logD | M08_octanol<br>M08_octanolH | M08_octanol<br>M08_octanolH | M08_octanol<br>M08_octanolH* | M08_octanol<br>M08_octanol* | Comment    |
|--------|---------------------|-----------------------------|-----------------------------|------------------------------|-----------------------------|------------|
| 1.000  | 3.00                | 0.58 %                      | 0.00 %                      | 99.42 %                      | 0.00 %                      | Stomach pH |
| 1.200  | 3.00                | 0.58 %                      | 0.00 %                      | 99.42 %                      | 0.00 %                      |            |
| 2.000  | 2.99                | 0.58 %                      | 0.00 %                      | 99.42 %                      | 0.00 %                      |            |
| 3.000  | 2.97                | 0.58 %                      | 0.03 %                      | 99.39 %                      | 0.00 %                      |            |
| 4.000  | 2.79                | 0.58 %                      | 0.35 %                      | 99.07 %                      | 0.00 %                      |            |
| 5.000  | 2.15                | 0.56 %                      | 3.38 %                      | 96.06 %                      | 0.00 %                      | Blood pH   |
| 6.000  | 1.21                | 0.43 %                      | 25.90 %                     | 73.67 %                      | 0.00 %                      |            |
| 6.500  | 0.71                | 0.28 %                      | 52.50 %                     | 47.23 %                      | 0.00 %                      |            |
| 7.000  | 0.22                | 0.13 %                      | 77.75 %                     | 22.12 %                      | 0.00 %                      |            |
| 7.400  | -0.18               | 0.06 %                      | 89.77 %                     | 10.17 %                      | 0.00 %                      |            |
| 8.000  | -0.78               | 0.02 %                      | 97.22 %                     | 2.77 %                       | 0.00 %                      |            |
| 9.000  | -1.78               | 0.00 %                      | 99.71 %                     | 0.28 %                       | 0.00 %                      |            |
| 10.000 | -2.78               | 0.00 %                      | 99.97 %                     | 0.03 %                       | 0.00 %                      |            |
| 11.000 | -3.77               | 0.00 %                      | 100.00 %                    | 0.00 %                       | 0.00 %                      |            |
| 12.000 | -4.65               | 0.00 %                      | 100.00 %                    | 0.00 %                       | 0.00 %                      |            |

## Carbonate and acidity

 Carbonate 0.000 mM  
 Acidity error -0.706 mM

## Other graphs

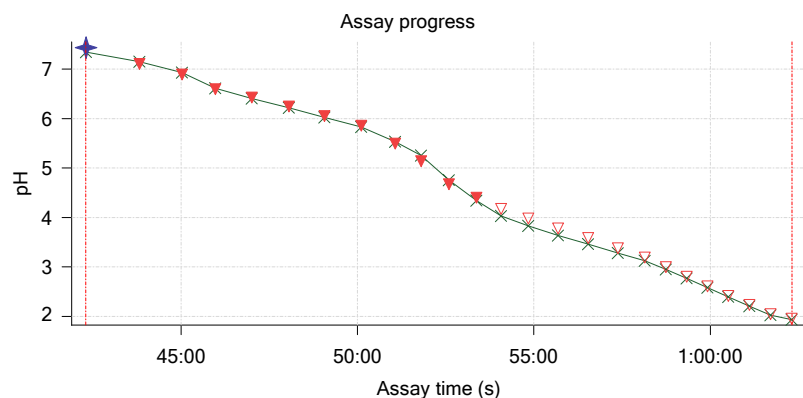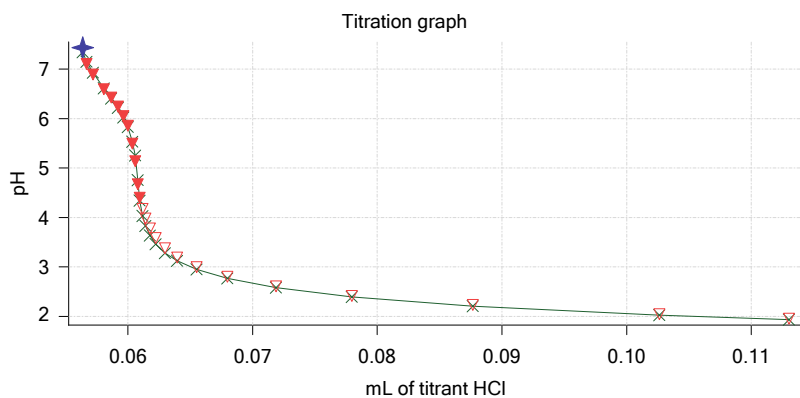



Sample name: **M08\_octanol**  
 Assay name: **pH-metric high logP**  
 Assay ID: **18C-02009**  
 Filename: **C:\Sirius\_T3\Mehtap\20180302\_exp29\_logP\_T3-2\18C-02009\_M08\_octanol\_pH-metric high logP.t3r**

Experiment start time: **3/2/2018 8:29:22 PM**  
 Analyst: **Pion**  
 Instrument ID: **T312060**

## Other graphs (continued)

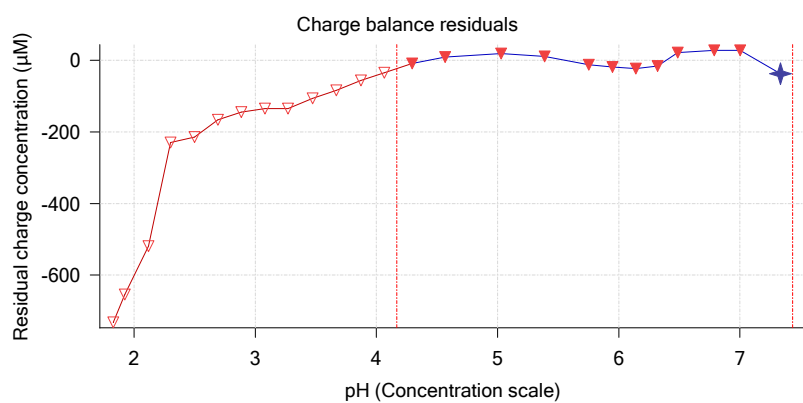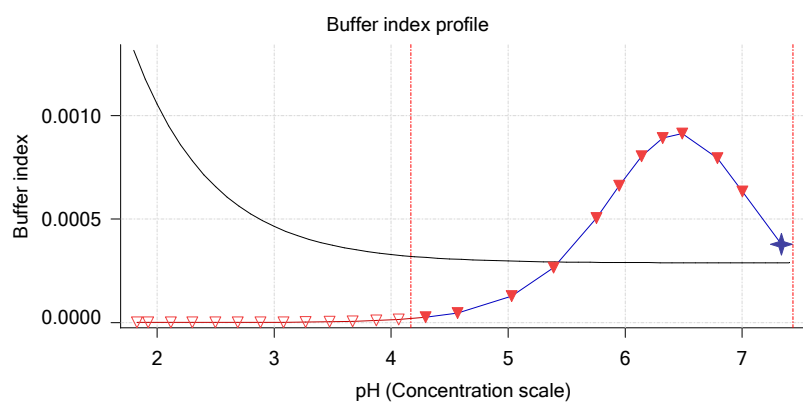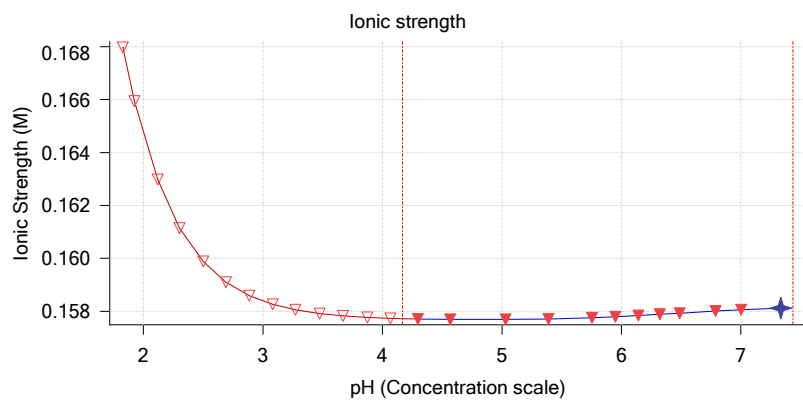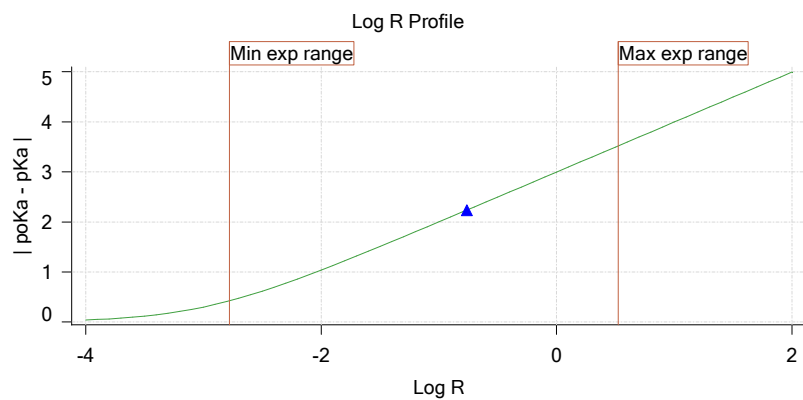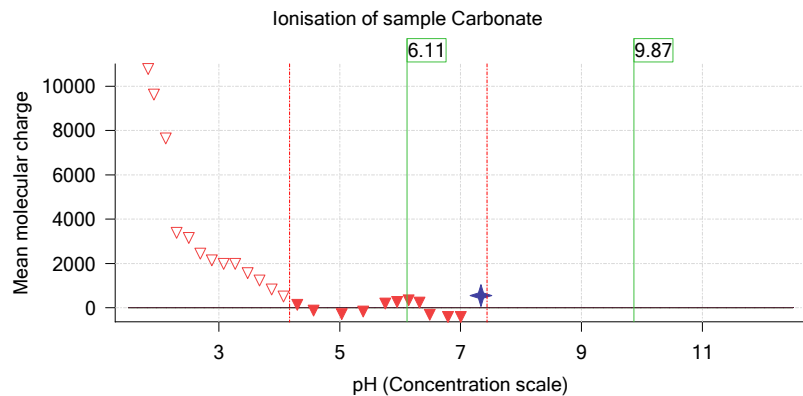

Sample name: **M08\_octanol**  
 Assay name: **pH-metric high logP**  
 Assay ID: **18C-02009**  
 Filename: **C:\Sirius\_T3\Mehtap\20180302\_exp29\_logP\_T3-2\18C-02009\_M08\_octanol\_pH-metric high logP.t3r**

Experiment start time: **3/2/2018 8:29:22 PM**  
 Analyst: **Pion**  
 Instrument ID: **T312060**

pH-metric high logP Titration 3 of 3 18C-02009 Points 64 to 92

## Overall results

RMSD 0.092  
 Average ionic strength 0.164 M  
 Average temperature 25.0°C  
 Partition ratio 0.6226 : 1  
 Analyte concentration range 1164.0 µM to 1189.2 µM  
 Total points considered 19 of 29

## Warnings and errors

Errors None  
 Warnings One or more logP values out of range

## Four-Plus parameters

Alpha 0.111 3/2/2018 8:29:22 PM C:\Sirius\_T3\HCl18C02.t3r  
 S 0.9988 3/2/2018 8:29:22 PM C:\Sirius\_T3\HCl18C02.t3r  
 jH 1.0 3/2/2018 8:29:22 PM C:\Sirius\_T3\HCl18C02.t3r  
 jOH -0.8 3/2/2018 8:29:22 PM C:\Sirius\_T3\HCl18C02.t3r

## Titrants

0.50 M HCl 0.999058 3/2/2018 8:29:22 PM C:\Sirius\_T3\HCl18C02.t3r  
 0.50 M KOH 0.999845 3/2/2018 8:29:22 PM C:\Sirius\_T3\KOH18B27.t3r

## Sample

M08\_octanol concentration factor 0.703  
 Acid pKa 1 4.22  
 logP (neutral XH) 2.87  
 logP (X-) -5.22

## Sample graphs

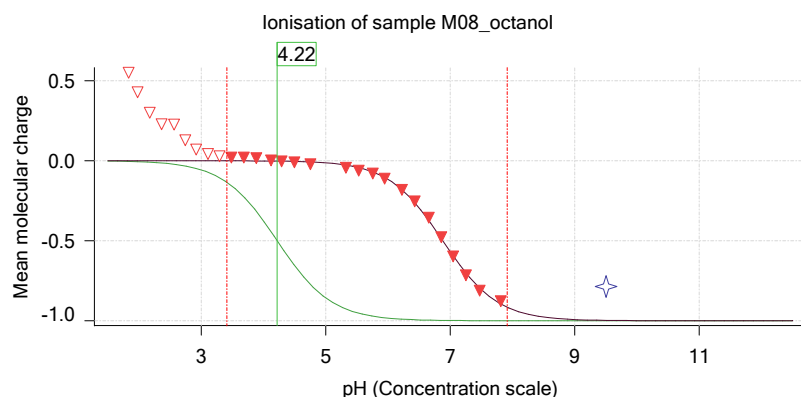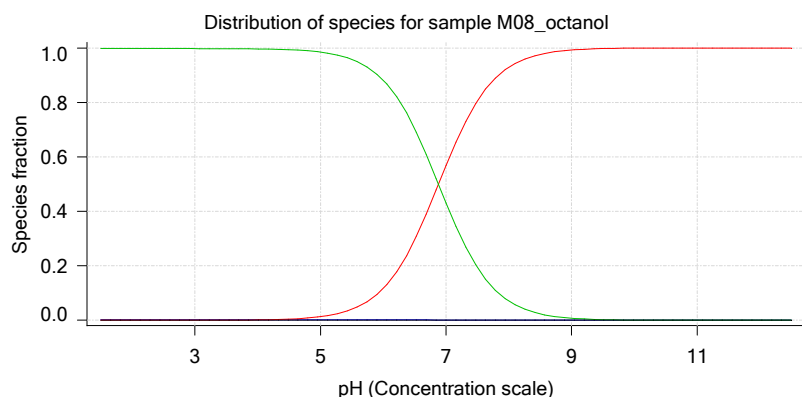

Sample name: **M08\_octanol**  
 Assay name: **pH-metric high logP**  
 Assay ID: **18C-02009**  
 Filename: **C:\Sirius\_T3\Mehtap\20180302\_exp29\_logP\_T3-2\18C-02009\_M08\_octanol\_pH-metric high logP.t3r**

Experiment start time: **3/2/2018 8:29:22 PM**  
 Analyst: **Pion**  
 Instrument ID: **T312060**

## Sample graphs (continued)

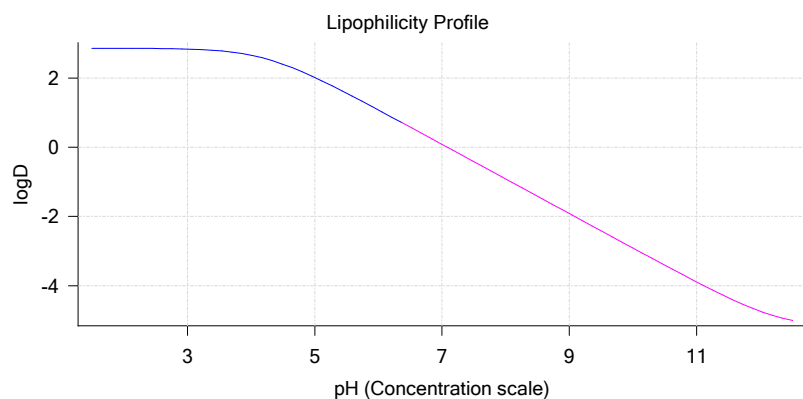

## Sample logD and percent species

| pH     | M08_octanol<br>logD | M08_octanol<br>M08_octanolH | M08_octanol<br>M08_octanolH | M08_octanol<br>M08_octanolH* | M08_octanol<br>M08_octanol* | Comment |
|--------|---------------------|-----------------------------|-----------------------------|------------------------------|-----------------------------|---------|
| 1.000  | 2.86                | 0.22 %                      | 0.00 %                      | 99.78 %                      | 0.00 %                      |         |
| 1.200  | 2.86                | 0.22 %                      | 0.00 %                      | 99.78 %                      | 0.00 %                      |         |
| 2.000  | 2.86                | 0.22 %                      | 0.00 %                      | 99.78 %                      | 0.00 %                      |         |
| 3.000  | 2.84                | 0.22 %                      | 0.01 %                      | 99.77 %                      | 0.00 %                      |         |
| 4.000  | 2.66                | 0.22 %                      | 0.13 %                      | 99.65 %                      | 0.00 %                      |         |
| 5.000  | 2.02                | 0.22 %                      | 1.30 %                      | 98.48 %                      | 0.00 %                      |         |
| 6.000  | 1.08                | 0.19 %                      | 11.64 %                     | 88.17 %                      | 0.00 %                      |         |
| 6.500  | 0.58                | 0.15 %                      | 29.40 %                     | 70.44 %                      | 0.00 %                      |         |
| 7.000  | 0.08                | 0.09 %                      | 56.84 %                     | 43.06 %                      | 0.00 %                      |         |
| 7.400  | -0.32               | 0.05 %                      | 76.79 %                     | 23.16 %                      | 0.00 %                      |         |
| 8.000  | -0.91               | 0.02 %                      | 92.94 %                     | 7.04 %                       | 0.00 %                      |         |
| 9.000  | -1.91               | 0.00 %                      | 99.25 %                     | 0.75 %                       | 0.00 %                      |         |
| 10.000 | -2.91               | 0.00 %                      | 99.92 %                     | 0.08 %                       | 0.00 %                      |         |
| 11.000 | -3.89               | 0.00 %                      | 99.99 %                     | 0.01 %                       | 0.00 %                      |         |
| 12.000 | -4.74               | 0.00 %                      | 100.00 %                    | 0.00 %                       | 0.00 %                      |         |

## Carbonate and acidity

 Carbonate 0.288 mM  
 Acidity error -0.437 mM

## Other graphs

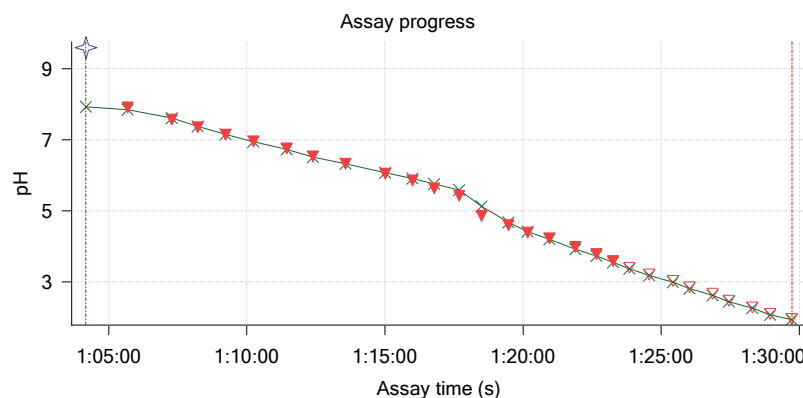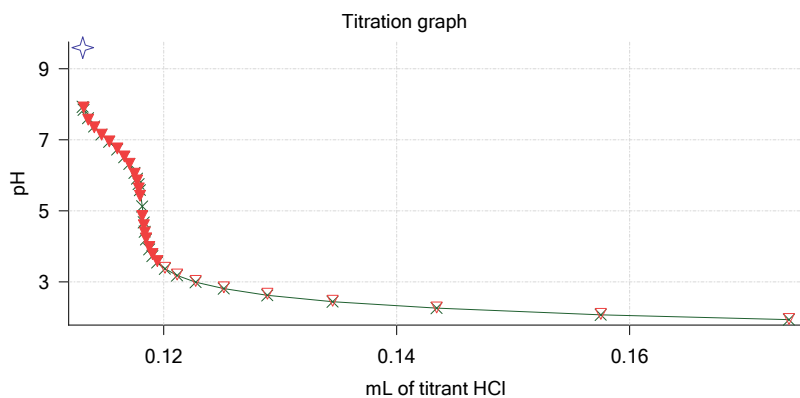

Sample name: **M08\_octanol**  
 Assay name: **pH-metric high logP**  
 Assay ID: **18C-02009**  
 Filename: **C:\Sirius\_T3\Mehtap\20180302\_exp29\_logP\_T3-2\18C-02009\_M08\_octanol\_pH-metric high logP.t3r**

Experiment start time: **3/2/2018 8:29:22 PM**  
 Analyst: **Pion**  
 Instrument ID: **T312060**

## Other graphs (continued)

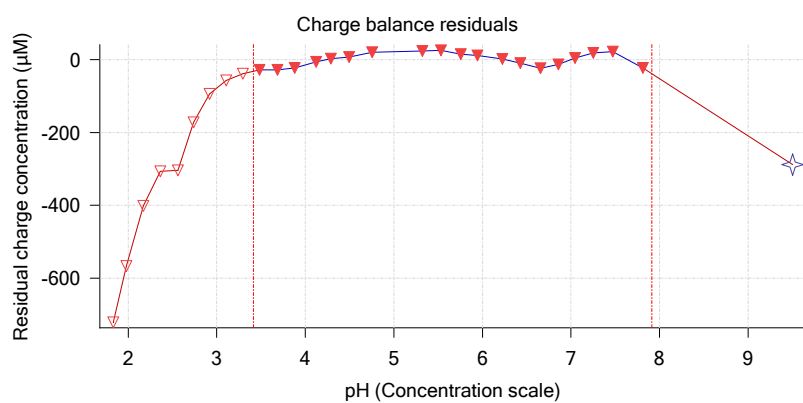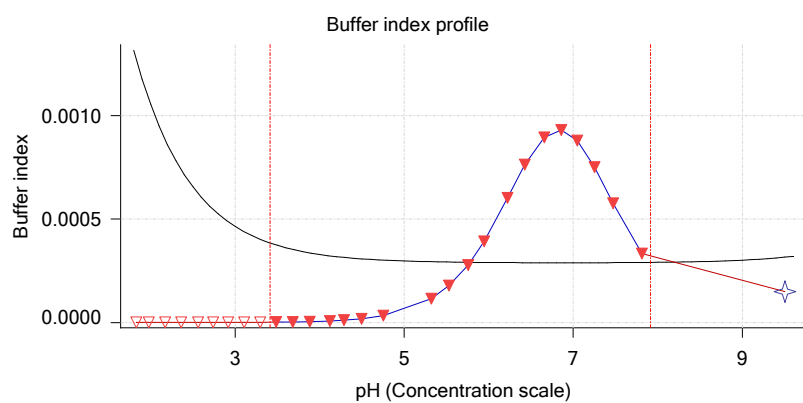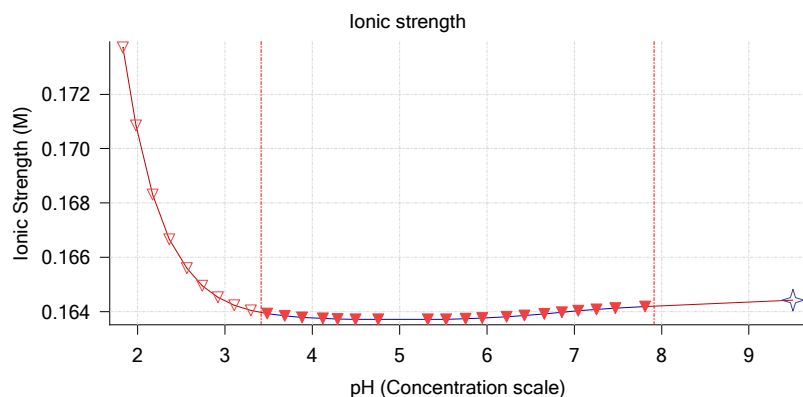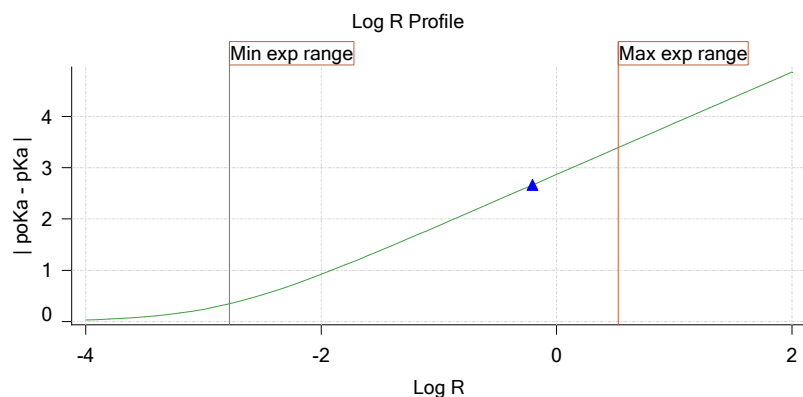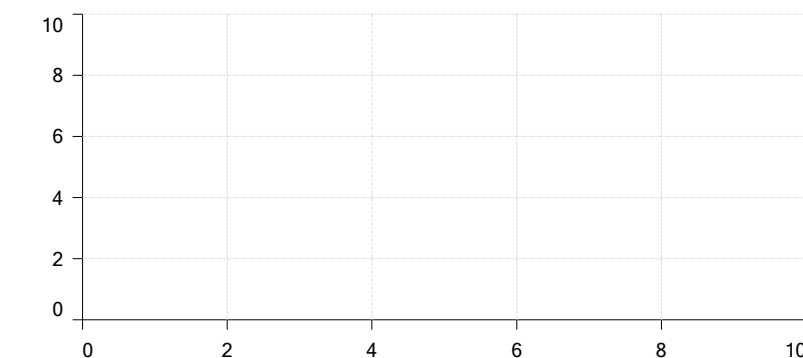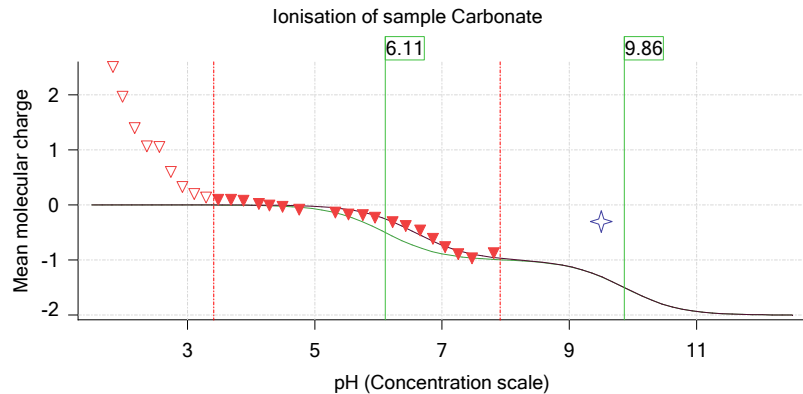

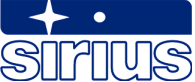

Sample name: **M08\_octanol** Experiment start time: **3/2/2018 8:29:22 PM**  
Assay name: **pH-metric high logP** Analyst: **Pion**  
Assay ID: **18C-02009** Instrument ID: **T312060**  
Filename: **C:\Sirius\_T3\Mehtap\20180302\_exp29\_logP\_T3-2\18C-02009\_M08\_octanol\_pH-metric high logP.t3r**

**Assay Model**

| Settings                          | Value        | Date/Time changed    | Imported from      |
|-----------------------------------|--------------|----------------------|--------------------|
| Sample name                       | M08_octanol  | 2/27/2018 4:33:51 PM | User entered value |
| Sample by                         | Weight       |                      | Default value      |
| Sample weight                     | 0.000980 g   | 3/2/2018 5:08:22 PM  | User entered value |
| Formula weight                    | 293.32 g/mol | 2/27/2018 4:33:51 PM | User entered value |
| Solubility                        | Unknown      |                      | Default value      |
| Molecular weight                  | 293.32       | 2/27/2018 4:33:51 PM | User entered value |
| Individual pKa ionic environments | No           |                      | Default value      |
| Number of pKas                    | 1            | 2/27/2018 4:33:51 PM | User entered value |
| Sample is a                       | Acid         | 2/27/2018 4:33:51 PM | User entered value |
| pKa 1                             | 4.22         | 2/27/2018 4:33:51 PM | User entered value |
| logP (neutral XH)                 | 2.98         | 3/2/2018 3:22:58 PM  | User entered value |
| logP (X -)                        | -5.22        | 3/2/2018 3:23:03 PM  | User entered value |

**Events**

| Time    | Event                  | Water      | Acid       | Base       | Octanol    | pH     | dpH/dt   | pH R-squared | pH SD   | dpH time           |
|---------|------------------------|------------|------------|------------|------------|--------|----------|--------------|---------|--------------------|
| 5:58.3  | Manual volume addition |            |            |            | 0.08000 mL |        |          |              |         |                    |
| 5:59.4  | Initial pH = 5.13      |            |            |            |            |        |          |              |         |                    |
| 8:51.4  | Data point 2           | 1.50000 mL | 0.00000 mL | 0.00680 mL | 0.08000 mL | 10.746 | -0.11246 | 0.99456      | 0.00557 | Time out at 35.0 s |
| 10:18.0 | Data point 3           | 1.50000 mL | 0.00042 mL | 0.00680 mL | 0.08000 mL | 10.400 | 0.01868  | 0.91894      | 0.00096 | 40.5 s             |
| 11:23.6 | Data point 4           | 1.50000 mL | 0.00092 mL | 0.00680 mL | 0.08000 mL | 10.058 | 0.01821  | 0.90743      | 0.00094 | 28.5 s             |
| 12:34.8 | Data point 5           | 1.50000 mL | 0.00125 mL | 0.00680 mL | 0.08000 mL | 9.666  | -0.01373 | 0.55829      | 0.00091 | 32.5 s             |
| 13:33.8 | Data point 6           | 1.50000 mL | 0.00143 mL | 0.00680 mL | 0.08000 mL | 9.296  | -0.01475 | 0.60041      | 0.00094 | 36.0 s             |
| 14:42.1 | Data point 7           | 1.50000 mL | 0.00155 mL | 0.00680 mL | 0.08000 mL | 8.888  | -0.01820 | 0.87464      | 0.00096 | 49.0 s             |
| 15:53.7 | Data point 8           | 1.50000 mL | 0.00162 mL | 0.00680 mL | 0.08000 mL | 8.376  | -0.01780 | 0.85957      | 0.00095 | 19.5 s             |
| 17:18.5 | Data point 9           | 1.50000 mL | 0.00169 mL | 0.00680 mL | 0.08000 mL | 7.991  | 0.00108  | 0.00290      | 0.00099 | 17.0 s             |
| 18:08.5 | Data point 10          | 1.50000 mL | 0.00179 mL | 0.00680 mL | 0.08000 mL | 7.676  | 0.01522  | 0.69377      | 0.00090 | 17.0 s             |
| 18:56.0 | Data point 11          | 1.50000 mL | 0.00193 mL | 0.00680 mL | 0.08000 mL | 7.439  | 0.01692  | 0.86099      | 0.00090 | 21.0 s             |
| 19:53.8 | Data point 12          | 1.50000 mL | 0.00216 mL | 0.00680 mL | 0.08000 mL | 7.216  | 0.01704  | 0.82585      | 0.00093 | 17.0 s             |
| 20:55.8 | Data point 13          | 1.50000 mL | 0.00247 mL | 0.00680 mL | 0.08000 mL | 7.024  | 0.01724  | 0.88730      | 0.00090 | 16.0 s             |
| 21:53.7 | Data point 14          | 1.50000 mL | 0.00287 mL | 0.00680 mL | 0.08000 mL | 6.840  | 0.01697  | 0.84626      | 0.00091 | 16.5 s             |
| 22:50.5 | Data point 15          | 1.50000 mL | 0.00339 mL | 0.00680 mL | 0.08000 mL | 6.669  | 0.01841  | 0.84076      | 0.00099 | 17.0 s             |
| 23:32.5 | Data point 16          | 1.50000 mL | 0.00395 mL | 0.00680 mL | 0.08000 mL | 6.504  | 0.01741  | 0.89494      | 0.00091 | 13.5 s             |
| 24:35.6 | Data point 17          | 1.50000 mL | 0.00494 mL | 0.00680 mL | 0.08000 mL | 6.285  | 0.01783  | 0.92060      | 0.00092 | 13.5 s             |
| 25:24.8 | Data point 18          | 1.50000 mL | 0.00571 mL | 0.00680 mL | 0.08000 mL | 6.116  | 0.01844  | 0.92964      | 0.00095 | 12.5 s             |
| 26:03.8 | Data point 19          | 1.50000 mL | 0.00651 mL | 0.00680 mL | 0.08000 mL | 5.916  | 0.01893  | 0.91741      | 0.00098 | 16.0 s             |
| 26:41.7 | Data point 20          | 1.50000 mL | 0.00727 mL | 0.00680 mL | 0.08000 mL | 5.710  | 0.01949  | 0.97281      | 0.00098 |                    |

Sample name: **M08\_octanol**  
 Assay name: **pH-metric high logP**  
 Assay ID: **18C-02009**  
 Filename: **C:\Sirius\_T3\Mehtap\20180302\_exp29\_logP\_T3-2\18C-02009\_M08\_octanol\_pH-metric high logP.t3r**

Experiment start time: **3/2/2018 8:29:22 PM**  
 Analyst: **Pion**  
 Instrument ID: **T312060**

## Events (continued)

| Time      | Event         | Water      | Acid       | Base       | Octanol    | pH    | dpH/dt   | pH R-squared | pH SD   | dpH/dt time         |
|-----------|---------------|------------|------------|------------|------------|-------|----------|--------------|---------|---------------------|
| 27:23.2   | Data point 21 | 1.50000 mL | 0.00790 mL | 0.00680 mL | 0.08000 mL | 5.477 | 0.01911  | 0.96079      | 0.00096 | 17.0 s              |
| 28:21.0   | Data point 22 | 1.50000 mL | 0.00847 mL | 0.00680 mL | 0.08000 mL | 5.183 | 0.01836  | 0.88513      | 0.00096 | 21.0 s              |
| 29:12.6   | Data point 23 | 1.50000 mL | 0.00870 mL | 0.00680 mL | 0.08000 mL | 5.036 | 0.05948  | 0.99622      | 0.00294 | Timed out at 59.5 s |
| 30:53.3   | Data point 24 | 1.50000 mL | 0.00891 mL | 0.00680 mL | 0.08000 mL | 4.931 | 0.05785  | 0.99230      | 0.00287 | Timed out at 59.5 s |
| 32:18.7   | Data point 25 | 1.50000 mL | 0.00913 mL | 0.00680 mL | 0.08000 mL | 4.496 | 0.01948  | 0.93912      | 0.00099 | 33.0 s              |
| 33:22.3   | Data point 26 | 1.50000 mL | 0.00924 mL | 0.00680 mL | 0.08000 mL | 4.310 | 0.01919  | 0.92386      | 0.00099 | 25.5 s              |
| 34:23.5   | Data point 27 | 1.50000 mL | 0.00938 mL | 0.00680 mL | 0.08000 mL | 4.106 | 0.01620  | 0.92889      | 0.00083 | 10.5 s              |
| 34:59.4   | Data point 28 | 1.50000 mL | 0.00960 mL | 0.00680 mL | 0.08000 mL | 3.868 | 0.01215  | 0.93122      | 0.00062 | 10.0 s              |
| 35:50.2   | Data point 29 | 1.50000 mL | 0.00995 mL | 0.00680 mL | 0.08000 mL | 3.663 | 0.01206  | 0.86827      | 0.00064 | 10.0 s              |
| 36:25.7   | Data point 30 | 1.50000 mL | 0.01044 mL | 0.00680 mL | 0.08000 mL | 3.447 | 0.00079  | 0.06082      | 0.00016 | 10.5 s              |
| 37:01.6   | Data point 31 | 1.50000 mL | 0.01124 mL | 0.00680 mL | 0.08000 mL | 3.252 | 0.00291  | 0.66841      | 0.00018 | 10.0 s              |
| 37:37.1   | Data point 32 | 1.50000 mL | 0.01251 mL | 0.00680 mL | 0.08000 mL | 3.063 | 0.00379  | 0.17037      | 0.00045 | 10.0 s              |
| 38:12.6   | Data point 33 | 1.50000 mL | 0.01446 mL | 0.00680 mL | 0.08000 mL | 2.886 | -0.00068 | 0.10900      | 0.00010 | 10.0 s              |
| 38:48.2   | Data point 34 | 1.50000 mL | 0.01743 mL | 0.00680 mL | 0.08000 mL | 2.708 | -0.00988 | 0.27293      | 0.00093 | 10.0 s              |
| 39:23.8   | Data point 35 | 1.50000 mL | 0.02192 mL | 0.00680 mL | 0.08000 mL | 2.530 | -0.00487 | 0.81957      | 0.00027 | 10.0 s              |
| 39:59.3   | Data point 36 | 1.50000 mL | 0.02876 mL | 0.00680 mL | 0.08000 mL | 2.343 | -0.01064 | 0.51106      | 0.00073 | 10.0 s              |
| 40:35.0   | Data point 37 | 1.50000 mL | 0.03949 mL | 0.00680 mL | 0.08000 mL | 2.157 | -0.01066 | 0.81291      | 0.00058 | 10.0 s              |
| 41:10.9   | Data point 38 | 1.50000 mL | 0.05637 mL | 0.00680 mL | 0.08000 mL | 1.971 | -0.01287 | 0.96844      | 0.00065 | 10.5 s              |
| 42:18.9   | Data point 39 | 1.50000 mL | 0.05637 mL | 0.05847 mL | 0.28000 mL | 7.437 | -0.14549 | 0.99322      | 0.00721 | Timed out at 59.5 s |
| 43:49.4   | Data point 40 | 1.50000 mL | 0.05670 mL | 0.05847 mL | 0.28000 mL | 7.103 | -0.01286 | 0.42347      | 0.00098 | 36.5 s              |
| 45:01.7   | Data point 41 | 1.50000 mL | 0.05720 mL | 0.05847 mL | 0.28000 mL | 6.891 | 0.01894  | 0.94814      | 0.00096 | 21.0 s              |
| 45:58.4   | Data point 42 | 1.50000 mL | 0.05807 mL | 0.05847 mL | 0.28000 mL | 6.590 | 0.01908  | 0.89638      | 0.00100 | 26.5 s              |
| 47:00.7   | Data point 43 | 1.50000 mL | 0.05868 mL | 0.05847 mL | 0.28000 mL | 6.423 | 0.01918  | 0.91840      | 0.00099 | 27.0 s              |
| 48:03.4   | Data point 44 | 1.50000 mL | 0.05920 mL | 0.05847 mL | 0.28000 mL | 6.245 | 0.01858  | 0.85197      | 0.00099 | 25.0 s              |
| 49:04.1   | Data point 45 | 1.50000 mL | 0.05964 mL | 0.05847 mL | 0.28000 mL | 6.052 | 0.01835  | 0.93095      | 0.00094 | 26.5 s              |
| 50:06.3   | Data point 46 | 1.50000 mL | 0.06000 mL | 0.05847 mL | 0.28000 mL | 5.858 | 0.01996  | 0.97913      | 0.00100 | 22.0 s              |
| 51:04.1   | Data point 47 | 1.50000 mL | 0.06037 mL | 0.05847 mL | 0.28000 mL | 5.493 | 0.01776  | 0.89690      | 0.00093 | 19.0 s              |
| 51:48.5   | Data point 48 | 1.50000 mL | 0.06058 mL | 0.05847 mL | 0.28000 mL | 5.135 | 0.01954  | 0.96361      | 0.00098 | 16.5 s              |
| 52:35.6   | Data point 49 | 1.50000 mL | 0.06079 mL | 0.05847 mL | 0.28000 mL | 4.673 | 0.01944  | 0.94099      | 0.00099 | 16.0 s              |
| 53:22.2   | Data point 50 | 1.50000 mL | 0.06096 mL | 0.05847 mL | 0.28000 mL | 4.401 | 0.01686  | 0.77173      | 0.00095 | 11.5 s              |
| 54:04.2   | Data point 51 | 1.50000 mL | 0.06117 mL | 0.05847 mL | 0.28000 mL | 4.172 | 0.01841  | 0.83644      | 0.00099 | 10.5 s              |
| 54:50.4   | Data point 52 | 1.50000 mL | 0.06141 mL | 0.05847 mL | 0.28000 mL | 3.979 | 0.00270  | 0.11201      | 0.00040 | 10.0 s              |
| 55:41.2   | Data point 53 | 1.50000 mL | 0.06176 mL | 0.05847 mL | 0.28000 mL | 3.777 | 0.00199  | 0.23344      | 0.00020 | 10.0 s              |
| 56:32.1   | Data point 54 | 1.50000 mL | 0.06223 mL | 0.05847 mL | 0.28000 mL | 3.582 | 0.00442  | 0.54450      | 0.00030 | 10.0 s              |
| 57:23.0   | Data point 55 | 1.50000 mL | 0.06298 mL | 0.05847 mL | 0.28000 mL | 3.377 | -0.00183 | 0.13137      | 0.00025 | 10.0 s              |
| 58:08.8   | Data point 56 | 1.50000 mL | 0.06395 mL | 0.05847 mL | 0.28000 mL | 3.187 | -0.00575 | 0.75760      | 0.00033 | 10.0 s              |
| 58:44.2   | Data point 57 | 1.50000 mL | 0.06552 mL | 0.05847 mL | 0.28000 mL | 2.993 | -0.00768 | 0.67458      | 0.00046 | 10.0 s              |
| 59:19.7   | Data point 58 | 1.50000 mL | 0.06799 mL | 0.05847 mL | 0.28000 mL | 2.800 | -0.00920 | 0.23870      | 0.00093 | 10.0 s              |
| 59:55.3   | Data point 59 | 1.50000 mL | 0.07187 mL | 0.05847 mL | 0.28000 mL | 2.609 | -0.00893 | 0.93688      | 0.00046 | 10.0 s              |
| 1:00:30.9 | Data point 60 | 1.50000 mL | 0.07796 mL | 0.05847 mL | 0.28000 mL | 2.414 | -0.01402 | 0.81271      | 0.00077 | 10.0 s              |
| 1:01:06.6 | Data point 61 | 1.50000 mL | 0.08765 mL | 0.05847 mL | 0.28000 mL | 2.234 | -0.01252 | 0.94599      | 0.00064 | 10.0 s              |
| 1:01:42.4 | Data point 62 | 1.50000 mL | 0.10263 mL | 0.05847 mL | 0.28000 mL | 2.045 | -0.01296 | 0.81107      | 0.00071 | 10.0 s              |
| 1:02:18.1 | Data point 63 | 1.50000 mL | 0.11303 mL | 0.05847 mL | 0.28000 mL | 1.952 | -0.01017 | 0.74429      | 0.00058 | 10.0 s              |
| 1:04:11.0 | Data point 64 | 1.50000 mL | 0.11303 mL | 0.11660 mL | 1.08000 mL | 9.602 | -0.07572 | 0.97633      | 0.00379 | Timed out at 59.5 s |
| 1:05:41.5 | Data point 65 | 1.50000 mL | 0.11312 mL | 0.11660 mL | 1.08000 mL | 7.914 | -0.01009 | 0.17302      | 0.00120 | Timed out at 59.5 s |
| 1:07:17.2 | Data point 66 | 1.50000 mL | 0.11350 mL | 0.11660 mL | 1.08000 mL | 7.574 | 0.00521  | 0.07080      | 0.00097 | 20.5 s              |
| 1:08:13.4 | Data point 67 | 1.50000 mL | 0.11402 mL | 0.11660 mL | 1.08000 mL | 7.354 | 0.00770  | 0.15435      | 0.00097 | 25.0 s              |
| 1:09:14.2 | Data point 68 | 1.50000 mL | 0.11465 mL | 0.11660 mL | 1.08000 mL | 7.149 | 0.01456  | 0.60986      | 0.00092 | 24.5 s              |
| 1:10:14.4 | Data point 69 | 1.50000 mL | 0.11531 mL | 0.11660 mL | 1.08000 mL | 6.960 | 0.01422  | 0.79037      | 0.00079 | 31.5 s              |
| 1:11:26.9 | Data point 70 | 1.50000 mL | 0.11599 mL | 0.11660 mL | 1.08000 mL | 6.759 | 0.01621  | 0.64775      | 0.00100 | 31.5 s              |
| 1:12:23.9 | Data point 71 | 1.50000 mL | 0.11660 mL | 0.11660 mL | 1.08000 mL | 6.531 | 0.01843  | 0.87072      | 0.00098 | 45.0 s              |
| 1:13:34.3 | Data point 72 | 1.50000 mL | 0.11705 mL | 0.11660 mL | 1.08000 mL | 6.327 | 0.01609  | 0.74484      | 0.00092 | 40.5 s              |

Sample name: **M08\_octanol**  
 Assay name: **pH-metric high logP**  
 Assay ID: **18C-02009**  
 Filename: **C:\Sirius\_T3\Mehtap\20180302\_exp29\_logP\_T3-2\18C-02009\_M08\_octanol\_pH-metric high logP.t3r**

Experiment start time: **3/2/2018 8:29:22 PM**  
 Analyst: **Pion**  
 Instrument ID: **T312060**

## Events (continued)

| Time      | Event         | Water      | Acid       | Base       | Octanol    | pH    | dpH/dt   | pH R-squared | pH SD   | dpH/dt time |
|-----------|---------------|------------|------------|------------|------------|-------|----------|--------------|---------|-------------|
| 1:15:00.9 | Data point 73 | 1.50000 mL | 0.11750 mL | 0.11660 mL | 1.08000 mL | 6.048 | 0.00782  | 0.18941      | 0.00089 | 23.5 s      |
| 1:16:00.0 | Data point 74 | 1.50000 mL | 0.11771 mL | 0.11660 mL | 1.08000 mL | 5.859 | 0.00920  | 0.23435      | 0.00094 | 21.5 s      |
| 1:16:46.9 | Data point 75 | 1.50000 mL | 0.11785 mL | 0.11660 mL | 1.08000 mL | 5.634 | 0.01897  | 0.91284      | 0.00098 | 24.0 s      |
| 1:17:41.5 | Data point 76 | 1.50000 mL | 0.11797 mL | 0.11660 mL | 1.08000 mL | 5.426 | 0.01127  | 0.33431      | 0.00097 | 18.0 s      |
| 1:18:30.1 | Data point 77 | 1.50000 mL | 0.11816 mL | 0.11660 mL | 1.08000 mL | 4.860 | 0.01580  | 0.66582      | 0.00096 | 22.5 s      |
| 1:19:28.2 | Data point 78 | 1.50000 mL | 0.11827 mL | 0.11660 mL | 1.08000 mL | 4.601 | -0.00526 | 0.07244      | 0.00097 | 11.5 s      |
| 1:20:10.2 | Data point 79 | 1.50000 mL | 0.11837 mL | 0.11660 mL | 1.08000 mL | 4.394 | 0.01090  | 0.29750      | 0.00099 | 21.5 s      |
| 1:20:57.2 | Data point 80 | 1.50000 mL | 0.11848 mL | 0.11660 mL | 1.08000 mL | 4.228 | 0.00338  | 0.03554      | 0.00089 | 10.5 s      |
| 1:21:53.7 | Data point 81 | 1.50000 mL | 0.11874 mL | 0.11660 mL | 1.08000 mL | 3.988 | -0.01055 | 0.71176      | 0.00062 | 10.0 s      |
| 1:22:39.4 | Data point 82 | 1.50000 mL | 0.11903 mL | 0.11660 mL | 1.08000 mL | 3.791 | -0.01849 | 0.93115      | 0.00095 | 10.5 s      |
| 1:23:15.3 | Data point 83 | 1.50000 mL | 0.11945 mL | 0.11660 mL | 1.08000 mL | 3.591 | -0.01497 | 0.62245      | 0.00094 | 10.0 s      |
| 1:23:50.8 | Data point 84 | 1.50000 mL | 0.12011 mL | 0.11660 mL | 1.08000 mL | 3.403 | 0.01050  | 0.27436      | 0.00099 | 18.0 s      |
| 1:24:34.2 | Data point 85 | 1.50000 mL | 0.12114 mL | 0.11660 mL | 1.08000 mL | 3.213 | 0.00072  | 0.00159      | 0.00089 | 25.5 s      |
| 1:25:25.3 | Data point 86 | 1.50000 mL | 0.12274 mL | 0.11660 mL | 1.08000 mL | 3.027 | -0.00532 | 0.13136      | 0.00073 | 10.5 s      |
| 1:26:01.3 | Data point 87 | 1.50000 mL | 0.12517 mL | 0.11660 mL | 1.08000 mL | 2.849 | -0.00610 | 0.09602      | 0.00097 | 25.0 s      |
| 1:26:51.9 | Data point 88 | 1.50000 mL | 0.12888 mL | 0.11660 mL | 1.08000 mL | 2.672 | -0.01765 | 0.96186      | 0.00089 | 10.0 s      |
| 1:27:27.4 | Data point 89 | 1.50000 mL | 0.13450 mL | 0.11660 mL | 1.08000 mL | 2.475 | -0.00467 | 0.05593      | 0.00097 | 24.5 s      |
| 1:28:17.7 | Data point 90 | 1.50000 mL | 0.14344 mL | 0.11660 mL | 1.08000 mL | 2.286 | -0.01613 | 0.73740      | 0.00093 | 13.5 s      |
| 1:28:56.9 | Data point 91 | 1.50000 mL | 0.15753 mL | 0.11660 mL | 1.08000 mL | 2.098 | 0.00368  | 0.03491      | 0.00097 | 20.5 s      |
| 1:29:43.3 | Data point 92 | 1.50000 mL | 0.17368 mL | 0.11660 mL | 1.08000 mL | 1.955 | 0.00356  | 0.03439      | 0.00095 | 19.5 s      |
| 1:30:11.8 | Assay volumes | 1.50000 mL | 0.17368 mL | 0.11660 mL | 1.08000 mL |       |          |              |         |             |



Sample name: **M08\_octanol**  
 Assay name: **pH-metric high logP**  
 Assay ID: **18C-02009**  
 Filename: **C:\Sirius\_T3\Mehtap\20180302\_exp29\_logP\_T3-2\18C-02009\_M08\_octanol\_pH-metric high logP.t3r**

Experiment start time: **3/2/2018 8:29:22 PM**  
 Analyst: **Pion**  
 Instrument ID: **T312060**

## Assay Settings

| Setting                             | Value              | Original Value | Date/Time changed | Imported from |
|-------------------------------------|--------------------|----------------|-------------------|---------------|
| <b>General Settings</b>             |                    |                |                   |               |
| Analyst name                        | Pion               |                |                   |               |
| <b>Standard Experiment Settings</b> |                    |                |                   |               |
| Number of titrations                | 3                  |                |                   |               |
| Minimum pH                          | 2.000              |                |                   |               |
| Maximum pH                          | 10.000             |                |                   |               |
| pH step between points of           | 0.200              |                |                   |               |
| Minimum titrant addition            | 0.00002 mL         |                |                   |               |
| Maximum titrant addition            | 0.10000 mL         |                |                   |               |
| Argon flow rate                     | 100%               |                |                   |               |
| Start titration using               | Cautious pH adjust |                |                   |               |
| <b>Advanced General Settings</b>    |                    |                |                   |               |
| Detect turbidity using              | None               |                |                   |               |
| Collect turbidity sensor data       | No                 |                |                   |               |
| Collect UV spectra                  | No                 |                |                   |               |
| Stir after titrant addition for     | 5 seconds          |                |                   |               |
| For titrant addition, stir at       | 10%                |                |                   |               |
| <b>Titration Pre-Dose</b>           |                    |                |                   |               |
| Titration pre-dose                  | None               |                |                   |               |
| <b>Assay Medium</b>                 |                    |                |                   |               |
| ISA water volume                    | 1.50 mL            |                |                   |               |
| Water added                         | Automatic          |                |                   |               |
| Partition solvent type              | Octanol            |                |                   |               |
| Partition volume                    | 0.080 mL           |                |                   |               |
| Partition solvent added             | Manual in advance  |                |                   |               |
| After partition addition, stir for  | 1 seconds          |                |                   |               |
| <b>Sample Sonication</b>            |                    |                |                   |               |
| Sonicate                            | Yes                |                |                   |               |
| Adjust pH for sonication            | No                 |                |                   |               |
| Sonicate for                        | 120 seconds        |                |                   |               |
| After sonication stir for           | 5 seconds          |                |                   |               |
| <b>Sample Dissolution</b>           |                    |                |                   |               |
| Perform a dissolution stage         | Yes                |                |                   |               |
| Adjust and hold pH for dissolution  | To start pH        |                |                   |               |
| Stir to dissolve for                | 120 seconds        |                |                   |               |
| For dissolution, stir at            | 10%                |                |                   |               |
| <b>Carbonate purge</b>              |                    |                |                   |               |
| Perform a carbonate purge           | No                 |                |                   |               |
| <b>Temperature Control</b>          |                    |                |                   |               |
| Wait for temperature                | Yes                |                |                   |               |
| Required start temperature          | 25.0°C             |                |                   |               |
| Acceptable deviation                | 0.5°C              |                |                   |               |
| Time to wait                        | 60 seconds         |                |                   |               |
| Stir speed of                       | 50%                |                |                   |               |
| <b>Titration 1</b>                  |                    |                |                   |               |
| Titrate from                        | High to low pH     |                |                   |               |
| Adjust to start pH                  | Yes                |                |                   |               |
| After pH adjust stir for            | 30 seconds         |                |                   |               |
| Stir to allow partitioning for      | 15 seconds         |                |                   |               |
| Stirrer speed for partitioning      | 50%                |                |                   |               |
| <b>Titration 2</b>                  |                    |                |                   |               |
| Titrate from                        | High to low pH     |                |                   |               |
| Add additional water                | 0.00 mL            |                |                   |               |
| Additional partition solvent volume | 0.200 mL           |                |                   |               |
| Additional partition solvent added  | Automatic          |                |                   |               |
| After pH adjust stir for            | 30 seconds         |                |                   |               |
| Stir to allow partitioning for      | 15 seconds         |                |                   |               |
| Stirrer speed for partitioning      | 55%                |                |                   |               |



Sample name: **M08\_octanol** Experiment start time: **3/2/2018 8:29:22 PM**  
 Assay name: **pH-metric high logP** Analyst: **Pion**  
 Assay ID: **18C-02009** Instrument ID: **T312060**  
 Filename: **C:\Sirius\_T3\Mehtap\20180302\_exp29\_logP\_T3-2\18C-02009\_M08\_octanol\_pH-metric high logP.t3r**

## Assay Settings (continued)

| Setting                             | Value          | Original Value | Date/Time changed | Imported from |
|-------------------------------------|----------------|----------------|-------------------|---------------|
| <b>Titration 3</b>                  |                |                |                   |               |
| Titrate from                        | High to low pH |                |                   |               |
| Add additional water                | 0.00 mL        |                |                   |               |
| Additional partition solvent volume | 0.800 mL       |                |                   |               |
| Additional partition solvent added  | Automatic      |                |                   |               |
| After pH adjust stir for            | 30 seconds     |                |                   |               |
| Stir to allow partitioning for      | 15 seconds     |                |                   |               |
| Stirrer speed for partitioning      | 60%            |                |                   |               |
| <b>Data Point Stability</b>         |                |                |                   |               |
| Stir during data point collection   | No             |                |                   |               |
| Delay before data point collection  | 0 seconds      |                |                   |               |
| Number of points to average         | 20 points      |                |                   |               |
| Time interval between points        | 0.50 seconds   |                |                   |               |
| Required maximum standard deviation | 0.00100 dpH/dt |                |                   |               |
| Stability timeout after             | 60 seconds     |                |                   |               |

## Calibration Settings

| Setting                   | Value  | Date/Time changed   | Imported from             |
|---------------------------|--------|---------------------|---------------------------|
| Four-Plus alpha           | 0.111  | 3/2/2018 8:29:22 PM | C:\Sirius_T3\HCl18C02.t3r |
| Four-Plus S               | 0.9988 | 3/2/2018 8:29:22 PM | C:\Sirius_T3\HCl18C02.t3r |
| Four-Plus jH              | 1.0    | 3/2/2018 8:29:22 PM | C:\Sirius_T3\HCl18C02.t3r |
| Four-Plus jOH             | -0.8   | 3/2/2018 8:29:22 PM | C:\Sirius_T3\HCl18C02.t3r |
| Base concentration factor | 1.000  | 3/2/2018 8:29:22 PM | C:\Sirius_T3\KOH18B27.t3r |
| Acid concentration factor | 0.999  | 3/2/2018 8:29:22 PM | C:\Sirius_T3\HCl18C02.t3r |

## Instrument Settings

| Setting              | Value                      | Batch Id    | Install date           |
|----------------------|----------------------------|-------------|------------------------|
| Instrument owner     | Merck                      |             |                        |
| Instrument ID        | T312060                    |             |                        |
| Instrument type      | T3 Simulator               |             |                        |
| Software version     | 1.1.3.0                    |             |                        |
| Dispenser module     |                            | T3DM1200361 | 3/31/2009 5:24:52 AM   |
| Dispenser 0          | Water                      |             | 3/31/2009 5:25:05 AM   |
| Syringe volume       | 2.5 mL                     |             |                        |
| Firmware version     | 1.2.1(r2)                  |             |                        |
| Titrant              | Water (0.15 M KCl)         | 02-06-2018  | 2/27/2018 10:05:59 AM  |
| Dispenser 2          | Acid                       |             | 3/31/2009 5:25:11 AM   |
| Syringe volume       | 0.5 mL                     |             |                        |
| Firmware version     | 1.2.1(r2)                  |             |                        |
| Titrant              | Acid (0.5 M HCl)           | 02-27-2018  | 2/27/2018 10:27:22 AM  |
| Dispenser 1          | Base                       |             | 3/31/2009 5:25:21 AM   |
| Syringe volume       | 0.5 mL                     |             |                        |
| Firmware version     | 1.2.1(r2)                  |             |                        |
| Titrant              | Base (0.5 M KOH)           | 9/22/2017   | 2/27/2018 10:21:22 AM  |
| Dispenser 5          | Cosolvent                  |             | 3/31/2009 5:26:24 AM   |
| Syringe volume       | 2.5 mL                     |             |                        |
| Firmware version     | 1.2.1(r2)                  |             |                        |
| Distribution valve 5 | Distribution Valve         |             | 3/31/2009 5:28:19 AM   |
| Firmware version     | 1.1.3                      |             |                        |
| Port A               | Methanol (80%, 0.15 M KCl) | 09-26-17    | 2/7/2018 9:42:01 AM    |
| Port B               | Cyclohexane                | 11-01-17    | 2/27/2018 10:37:57 AM  |
| Dispenser 3          | Buffer                     |             | 8/3/2010 5:05:16 AM    |
| Syringe volume       | 0.5 mL                     |             |                        |
| Firmware version     | 1.2.1(r2)                  |             |                        |
| Titrant              | Dodecane                   | 2018/01/31  | 2/28/2018 10:18:04 AM  |
| Dispenser 6          | Octanol                    |             | 10/22/2010 10:52:43 AM |

Sample name: **M08\_octanol**  
 Assay name: **pH-metric high logP**  
 Assay ID: **18C-02009**  
 Filename: **C:\Sirius\_T3\Mehtap\20180302\_exp29\_logP\_T3-2\18C-02009\_M08\_octanol\_pH-metric high logP.t3r**

Experiment start time: **3/2/2018 8:29:22 PM**  
 Analyst: **Pion**  
 Instrument ID: **T312060**

## Instrument Settings (continued)

| Setting                                   | Value                      | Batch Id    | Install date           |
|-------------------------------------------|----------------------------|-------------|------------------------|
| Syringe volume                            | 0.5 mL                     |             |                        |
| Firmware version                          | 1.2.1(r2)                  |             |                        |
| Titrant                                   | Octanol                    | 01-31-2018  | 2/27/2018 9:59:35 AM   |
| Titration                                 |                            | T3TM1200161 | 3/31/2009 5:24:17 AM   |
| Horizontal axis firmware version          | 1.17 AI1DI2DO2 Stepper 2   |             |                        |
| Vertical axis firmware version            | 1.17 AI1DI2DO2 Stepper 2   |             |                        |
| Chassis I/O firmware version              | 1.11 AI1DI0DO4 Norgren I/O |             |                        |
| Probe I/O firmware version                | 1.1.1                      |             |                        |
| Electrode                                 | T3 Electrode               | T3E0923     | 1/23/2018 2:01:00 PM   |
| E0 calibration                            | +3.76 mV                   |             | 3/2/2018 8:29:50 PM    |
| Filling solution                          | 3M KCl                     | KCL097      | 3/2/2018 9:43:24 AM    |
| Liquids                                   |                            |             |                        |
| Wash 1                                    | 50% IPA:50% Water          |             | 3/2/2018 9:45:12 AM    |
| Wash 2                                    | 0.5% Triton X-100 in H2O   |             | 3/2/2018 9:45:15 AM    |
| Buffer position 1                         | pH7 Wash                   |             | 3/2/2018 9:45:18 AM    |
| Buffer position 2                         | pH 7                       |             | 3/2/2018 9:45:21 AM    |
| Storage position                          |                            |             | 3/2/2018 9:44:44 AM    |
| Wash water                                | 7.3e+003 mL                | 02-27-2018  | 2/27/2018 9:54:39 AM   |
| Waste                                     | 8.2e+003 mL                |             | 11/28/2017 10:36:29 AM |
| Temperature controller                    |                            |             | 8/5/2010 6:35:13 AM    |
| Turbidity detector                        |                            |             | 3/31/2009 5:24:45 AM   |
| Spectrometer                              |                            | 074811      | 11/23/2010 11:22:28 AM |
| Dip probe                                 |                            | 10196       |                        |
| Wavelength coefficient A0                 | 183.333                    |             |                        |
| Wavelength coefficient A1                 | 2.21568                    |             |                        |
| Wavelength coefficient A2                 | -0.000289308               |             |                        |
| Total lamp lit time                       | 120:41:49                  |             | 11/23/2010 11:22:28 AM |
| Calibrated on                             | 2/27/2018 10:40:38 AM      |             |                        |
| Integration time                          | 40                         |             |                        |
| Scans averaged                            | 10                         |             |                        |
| Autoloader                                |                            | T3AL1200345 | 11/10/2015 9:34:13 AM  |
| Left-right axis firmware version          | 1.17 AI1DI2DO2 Stepper 2   |             |                        |
| Front-back axis firmware version          | 1.17 AI1DI2DO2 Stepper 2   |             |                        |
| Vertical axis firmware version            | 1.17 AI1DI2DO2 Stepper 2   |             |                        |
| Chassis I/O firmware version              | 1.11 AI1DI0DO4 Norgren I/O |             |                        |
| Configuration                             |                            |             |                        |
| Alternate titration position              | Titration position         |             |                        |
| Alternate reference position              | Reference position         |             |                        |
| Maximum standard vial volume              | 3.50 mL                    |             |                        |
| Maximum alternate vial volume             | 25.00 mL                   |             |                        |
| Automatic action idle period              | 5 minute(s)                |             |                        |
| Titration tube volume                     | 1.3 mL                     |             |                        |
| Syringe flush count                       | 3.50                       |             |                        |
| Flowing wash pump volume                  | 20.0 mL                    |             |                        |
| Flowing wash stir duration                | 5 s                        |             |                        |
| Flowing wash stir speed                   | 30%                        |             |                        |
| Solvent wash stir duration                | 5 s                        |             |                        |
| Solvent wash stir speed                   | 30%                        |             |                        |
| Surfactant wash stir duration             | 5 s                        |             |                        |
| Surfactant wash stir speed                | 30%                        |             |                        |
| E0 calibration minimum number of points   | 10                         |             |                        |
| E0 calibration maximum standard deviation | 0.01500                    |             |                        |
| E0 calibration timeout period             | 60 s                       |             |                        |
| E0 calibration stir duration              | 5 s                        |             |                        |
| E0 calibration preparation stir speed     | 30%                        |             |                        |
| E0 calibration buffer wash stir duration  | 5 s                        |             |                        |
| E0 calibration buffer wash stir speed     | 30%                        |             |                        |
| E0 calibration reading stir speed         | 0%                         |             |                        |

Sample name: **M08\_octanol**  
 Assay name: **pH-metric high logP**  
 Assay ID: **18C-02009**  
 Filename: **C:\Sirius\_T3\Mehtap\20180302\_exp29\_logP\_T3-2\18C-02009\_M08\_octanol\_pH-metric high logP.t3r**

Experiment start time: **3/2/2018 8:29:22 PM**  
 Analyst: **Pion**  
 Instrument ID: **T312060**

## Instrument Settings (continued)

| Setting                                     | Value   | Batch Id | Install date |
|---------------------------------------------|---------|----------|--------------|
| Spectrometer calibration stir duration      | 5 s     |          |              |
| Spectrometer calibration stir speed         | 30%     |          |              |
| Spectrometer calibration wash pump volume   | 20.0 mL |          |              |
| Spectrometer calibration wash stir duration | 5 s     |          |              |
| Spectrometer calibration wash stir speed    | 30%     |          |              |
| Overhead dispense height                    | 10000   |          |              |

## Refinement Settings

| Setting                        | Value    | Default value |
|--------------------------------|----------|---------------|
| Turbidity detection method     | None     | None          |
| Turbidity wavelength to assess | 500.0 nm | 500.0 nm      |
| Turbidity maximum absorbance   | 0.100    | 0.100         |
| Turbidity probe threshold      | 50.00    | 50.00         |

## Experiment Log

[2:37] Air gap created for Water (0.15 M KCl)  
 [2:38] Air gap created for Acid (0.5 M HCl)  
 [2:38] Air gap created for Base (0.5 M KOH)  
 [2:38] Air gap released for Water (0.15 M KCl)  
 [2:42] Titrator arm moved over Titration position  
 [2:42] Titration 1 of 3  
 [2:42] Adding initial titrants  
 [2:42] Automatically add 1.50000 mL of water  
 [3:07] Dispensed 1.500000 mL of Water (0.15 M KCl)  
 [3:12] Titrator arm moved over Drain  
 [5:53] Titrator arm moved to Titration position  
 [5:53] Argon flow rate set to 100  
 [5:53] Stirrer speed set to 10  
 [5:59] Initial pH = 5.13  
 [5:59] Iterative adjust 5.13 -> 10.00  
 [5:59] pH 5.13 -> 10.00  
 [6:00] Air gap released for Base (0.5 M KOH)  
 [6:01] Dispensed 0.006797 mL of Base (0.5 M KOH)  
 [6:06] Holding pH 10.00  
 [8:06] Stirrer speed set to 0  
 [8:06] Stirrer speed set to 50  
 [8:06] Iterative adjust 11.17 -> 10.00  
 [8:51] Stirrer speed set to 0  
 [9:51] Datapoint id 2 collected  
 [9:51] Stirrer speed set to 50  
 [9:57] pH 10.75 -> 10.55  
 [9:57] Using cautious pH adjust  
 [9:57] Air gap released for Acid (0.5 M HCl)  
 [9:58] Dispensed 0.000423 mL of Acid (0.5 M HCl)  
 [10:03] Stepping pH = 10.52  
 [10:18] Stirrer speed set to 0  
 [10:53] Datapoint id 3 collected  
 [10:53] Charge balance equation is out by 49.8%  
 [10:53] Stirrer speed set to 50  
 [10:58] pH 10.39 -> 10.19  
 [10:58] Using cautious pH adjust  
 [10:58] Dispensed 0.000188 mL of Acid (0.5 M HCl)  
 [11:03] Stepping pH = 10.34  
 [11:04] Dispensed 0.000306 mL of Acid (0.5 M HCl)  
 [11:09] Stepping pH = 10.16  
 [11:24] Stirrer speed set to 0  
 [12:04] Datapoint id 4 collected

Sample name: **M08\_octanol**  
Assay name: **pH-metric high logP**  
Assay ID: **18C-02009**  
Filename: **C:\Sirius\_T3\Mehtap\20180302\_exp29\_logP\_T3-2\18C-02009\_M08\_octanol\_pH-metric high logP.t3r**

Experiment start time: **3/2/2018 8:29:22 PM**  
Analyst: **Pion**  
Instrument ID: **T312060**

## Experiment Log (continued)

[12:04] Charge balance equation is out by -24.4%  
[12:04] Stirrer speed set to 50  
[12:09] pH 10.05 -> 9.85  
[12:09] Using cautious pH adjust  
[12:09] Dispensed 0.000094 mL of Acid (0.5 M HCl)  
[12:15] Stepping pH = 10.02  
[12:15] Dispensed 0.000235 mL of Acid (0.5 M HCl)  
[12:20] Stepping pH = 9.77  
[12:35] Stirrer speed set to 0  
[13:03] Datapoint id 5 collected  
[13:03] Charge balance equation is out by -70.9%  
[13:03] Stirrer speed set to 50  
[13:09] pH 9.66 -> 9.46  
[13:09] Using cautious pH adjust  
[13:09] Dispensed 0.000047 mL of Acid (0.5 M HCl)  
[13:14] Stepping pH = 9.64  
[13:14] Dispensed 0.000141 mL of Acid (0.5 M HCl)  
[13:19] Stepping pH = 9.39  
[13:34] Stirrer speed set to 0  
[14:07] Datapoint id 6 collected  
[14:07] Charge balance equation is out by -86.9%  
[14:07] Stirrer speed set to 50  
[14:12] pH 9.28 -> 9.08  
[14:12] Using cautious pH adjust  
[14:12] Dispensed 0.000024 mL of Acid (0.5 M HCl)  
[14:17] Stepping pH = 9.26  
[14:17] Dispensed 0.000071 mL of Acid (0.5 M HCl)  
[14:22] Stepping pH = 9.10  
[14:22] Dispensed 0.000024 mL of Acid (0.5 M HCl)  
[14:27] Stepping pH = 9.03  
[14:42] Stirrer speed set to 0  
[15:18] Datapoint id 7 collected  
[15:18] Charge balance equation is out by -126.0%  
[15:18] Stirrer speed set to 50  
[15:23] pH 8.82 -> 8.62  
[15:23] Using cautious pH adjust  
[15:23] Dispensed 0.000024 mL of Acid (0.5 M HCl)  
[15:28] Stepping pH = 8.78  
[15:28] Dispensed 0.000024 mL of Acid (0.5 M HCl)  
[15:34] Stepping pH = 8.69  
[15:34] Dispensed 0.000024 mL of Acid (0.5 M HCl)  
[15:39] Stepping pH = 8.55  
[15:54] Stirrer speed set to 0  
[16:43] Datapoint id 8 collected  
[16:43] Charge balance equation is out by -159.4%  
[16:43] Stirrer speed set to 50  
[16:48] pH 8.28 -> 8.08  
[16:48] Using cautious pH adjust  
[16:48] Dispensed 0.000024 mL of Acid (0.5 M HCl)  
[16:53] Stepping pH = 8.24  
[16:53] Dispensed 0.000024 mL of Acid (0.5 M HCl)  
[16:58] Stepping pH = 8.17  
[16:58] Dispensed 0.000024 mL of Acid (0.5 M HCl)  
[17:03] Stepping pH = 8.08  
[17:19] Stirrer speed set to 0  
[17:38] Datapoint id 9 collected  
[17:38] Charge balance equation is out by -148.3%  
[17:38] Stirrer speed set to 50  
[17:43] pH 7.95 -> 7.75

Sample name: **M08\_octanol**  
Assay name: **pH-metric high logP**  
Assay ID: **18C-02009**  
Filename: **C:\Sirius\_T3\Mehtap\20180302\_exp29\_logP\_T3-2\18C-02009\_M08\_octanol\_pH-metric high logP.t3r**

Experiment start time: **3/2/2018 8:29:22 PM**  
Analyst: **Pion**  
Instrument ID: **T312060**

## Experiment Log (continued)

[17:43] Using cautious pH adjust  
[17:43] Dispensed 0.000024 mL of Acid (0.5 M HCl)  
[17:48] Stepping pH = 7.92  
[17:48] Dispensed 0.000071 mL of Acid (0.5 M HCl)  
[17:53] Stepping pH = 7.72  
[18:09] Stirrer speed set to 0  
[18:26] Datapoint id 10 collected  
[18:26] Charge balance equation is out by -62.6%  
[18:26] Stirrer speed set to 50  
[18:31] pH 7.65 -> 7.45  
[18:31] Using cautious pH adjust  
[18:31] Dispensed 0.000047 mL of Acid (0.5 M HCl)  
[18:36] Stepping pH = 7.62  
[18:36] Dispensed 0.000094 mL of Acid (0.5 M HCl)  
[18:41] Stepping pH = 7.44  
[18:56] Stirrer speed set to 0  
[19:13] Datapoint id 11 collected  
[19:13] Charge balance equation is out by -49.6%  
[19:13] Stirrer speed set to 50  
[19:18] pH 7.42 -> 7.22  
[19:18] Using cautious pH adjust  
[19:18] Dispensed 0.000071 mL of Acid (0.5 M HCl)  
[19:23] Stepping pH = 7.36  
[19:23] Dispensed 0.000094 mL of Acid (0.5 M HCl)  
[19:29] Stepping pH = 7.25  
[19:29] Dispensed 0.000024 mL of Acid (0.5 M HCl)  
[19:34] Stepping pH = 7.24  
[19:34] Dispensed 0.000047 mL of Acid (0.5 M HCl)  
[19:39] Stepping pH = 7.21  
[19:54] Stirrer speed set to 0  
[20:15] Datapoint id 12 collected  
[20:15] Charge balance equation is out by -60.4%  
[20:15] Stirrer speed set to 50  
[20:20] pH 7.21 -> 7.01  
[20:20] Using cautious pH adjust  
[20:20] Dispensed 0.000118 mL of Acid (0.5 M HCl)  
[20:25] Stepping pH = 7.11  
[20:25] Dispensed 0.000094 mL of Acid (0.5 M HCl)  
[20:30] Stepping pH = 7.04  
[20:31] Dispensed 0.000047 mL of Acid (0.5 M HCl)  
[20:36] Stepping pH = 7.03  
[20:36] Dispensed 0.000047 mL of Acid (0.5 M HCl)  
[20:41] Stepping pH = 7.01  
[20:56] Stirrer speed set to 0  
[21:13] Datapoint id 13 collected  
[21:13] Charge balance equation is out by -27.4%  
[21:13] Stirrer speed set to 50  
[21:18] pH 7.02 -> 6.82  
[21:18] Using cautious pH adjust  
[21:18] Dispensed 0.000165 mL of Acid (0.5 M HCl)  
[21:23] Stepping pH = 6.90  
[21:23] Dispensed 0.000094 mL of Acid (0.5 M HCl)  
[21:28] Stepping pH = 6.86  
[21:28] Dispensed 0.000071 mL of Acid (0.5 M HCl)  
[21:34] Stepping pH = 6.84  
[21:34] Dispensed 0.000071 mL of Acid (0.5 M HCl)  
[21:39] Stepping pH = 6.82  
[21:54] Stirrer speed set to 0  
[22:10] Datapoint id 14 collected

Sample name: **M08\_octanol**  
Assay name: **pH-metric high logP**  
Assay ID: **18C-02009**  
Filename: **C:\Sirius\_T3\Mehtap\20180302\_exp29\_logP\_T3-2\18C-02009\_M08\_octanol\_pH-metric high logP.t3r**

Experiment start time: **3/2/2018 8:29:22 PM**  
Analyst: **Pion**  
Instrument ID: **T312060**

## Experiment Log (continued)

[22:10] Charge balance equation is out by -25.3%  
[22:10] Stirrer speed set to 50  
[22:15] pH 6.84 -> 6.64  
[22:15] Using cautious pH adjust  
[22:15] Dispensed 0.000235 mL of Acid (0.5 M HCl)  
[22:20] Stepping pH = 6.72  
[22:20] Dispensed 0.000118 mL of Acid (0.5 M HCl)  
[22:25] Stepping pH = 6.68  
[22:25] Dispensed 0.000094 mL of Acid (0.5 M HCl)  
[22:30] Stepping pH = 6.66  
[22:30] Dispensed 0.000071 mL of Acid (0.5 M HCl)  
[22:36] Stepping pH = 6.65  
[22:51] Stirrer speed set to 0  
[23:07] Datapoint id 15 collected  
[23:07] Charge balance equation is out by -11.8%  
[23:07] Stirrer speed set to 50  
[23:12] pH 6.67 -> 6.47  
[23:12] Using charge balance adjust  
[23:12] Dispensed 0.000564 mL of Acid (0.5 M HCl)  
[23:33] Stirrer speed set to 0  
[23:50] Datapoint id 16 collected  
[23:50] Charge balance equation is out by -18.0%  
[23:50] Stirrer speed set to 50  
[23:55] pH 6.50 -> 6.30  
[23:55] Using cautious pH adjust  
[23:55] Dispensed 0.000329 mL of Acid (0.5 M HCl)  
[24:00] Stepping pH = 6.39  
[24:00] Dispensed 0.000212 mL of Acid (0.5 M HCl)  
[24:05] Stepping pH = 6.35  
[24:05] Dispensed 0.000165 mL of Acid (0.5 M HCl)  
[24:10] Stepping pH = 6.32  
[24:10] Dispensed 0.000071 mL of Acid (0.5 M HCl)  
[24:15] Stepping pH = 6.32  
[24:15] Dispensed 0.000212 mL of Acid (0.5 M HCl)  
[24:21] Stepping pH = 6.26  
[24:36] Stirrer speed set to 0  
[24:49] Datapoint id 17 collected  
[24:49] Charge balance equation is out by -45.8%  
[24:49] Stirrer speed set to 50  
[24:54] pH 6.29 -> 6.09  
[24:54] Using cautious pH adjust  
[24:54] Dispensed 0.000400 mL of Acid (0.5 M HCl)  
[25:00] Stepping pH = 6.17  
[25:00] Dispensed 0.000212 mL of Acid (0.5 M HCl)  
[25:05] Stepping pH = 6.13  
[25:05] Dispensed 0.000165 mL of Acid (0.5 M HCl)  
[25:10] Stepping pH = 6.10  
[25:25] Stirrer speed set to 0  
[25:38] Datapoint id 18 collected  
[25:38] Charge balance equation is out by 3.6%  
[25:38] Stirrer speed set to 50  
[25:44] pH 6.12 -> 5.92  
[25:44] Using charge balance adjust  
[25:44] Dispensed 0.000800 mL of Acid (0.5 M HCl)  
[26:04] Stirrer speed set to 0  
[26:16] Datapoint id 19 collected  
[26:16] Charge balance equation is out by 1.0%  
[26:16] Stirrer speed set to 50  
[26:22] pH 5.92 -> 5.72



Sample name: **M08\_octanol**  
Assay name: **pH-metric high logP**  
Assay ID: **18C-02009**  
Filename: **C:\Sirius\_T3\Mehtap\20180302\_exp29\_logP\_T3-2\18C-02009\_M08\_octanol\_pH-metric high logP.t3r**

Experiment start time: **3/2/2018 8:29:22 PM**  
Analyst: **Pion**  
Instrument ID: **T312060**

## Experiment Log (continued)

[26:22] Using charge balance adjust  
[26:22] Dispensed 0.000753 mL of Acid (0.5 M HCl)  
[26:42] Stirrer speed set to 0  
[26:58] Datapoint id 20 collected  
[26:58] Charge balance equation is out by 4.1%  
[26:58] Stirrer speed set to 50  
[27:03] pH 5.71 -> 5.51  
[27:03] Using charge balance adjust  
[27:03] Dispensed 0.000635 mL of Acid (0.5 M HCl)  
[27:23] Stirrer speed set to 0  
[27:40] Datapoint id 21 collected  
[27:40] Charge balance equation is out by 17.0%  
[27:40] Stirrer speed set to 50  
[27:45] pH 5.48 -> 5.28  
[27:45] Using cautious pH adjust  
[27:45] Dispensed 0.000235 mL of Acid (0.5 M HCl)  
[27:51] Stepping pH = 5.37  
[27:51] Dispensed 0.000141 mL of Acid (0.5 M HCl)  
[27:56] Stepping pH = 5.29  
[27:56] Dispensed 0.000024 mL of Acid (0.5 M HCl)  
[28:01] Stepping pH = 5.30  
[28:01] Dispensed 0.000165 mL of Acid (0.5 M HCl)  
[28:06] Stepping pH = 5.18  
[28:21] Stirrer speed set to 0  
[28:42] Datapoint id 22 collected  
[28:42] Charge balance equation is out by -22.3%  
[28:42] Stirrer speed set to 50  
[28:47] pH 5.18 -> 4.98  
[28:47] Using cautious pH adjust  
[28:47] Dispensed 0.000141 mL of Acid (0.5 M HCl)  
[28:52] Stepping pH = 5.08  
[28:52] Dispensed 0.000094 mL of Acid (0.5 M HCl)  
[28:58] Stepping pH = 4.98  
[29:13] Stirrer speed set to 0  
[30:13] Datapoint id 23 collected  
[30:13] Charge balance equation is out by 20.1%  
[30:13] Stirrer speed set to 50  
[30:18] pH 5.05 -> 4.85  
[30:18] Using cautious pH adjust  
[30:18] Dispensed 0.000118 mL of Acid (0.5 M HCl)  
[30:23] Stepping pH = 4.93  
[30:23] Dispensed 0.000047 mL of Acid (0.5 M HCl)  
[30:28] Stepping pH = 4.88  
[30:28] Dispensed 0.000024 mL of Acid (0.5 M HCl)  
[30:33] Stepping pH = 4.87  
[30:33] Dispensed 0.000024 mL of Acid (0.5 M HCl)  
[30:38] Stepping pH = 4.83  
[30:53] Stirrer speed set to 0  
[31:53] Datapoint id 24 collected  
[31:53] Charge balance equation is out by 5.3%  
[31:53] Stirrer speed set to 50  
[31:59] pH 4.99 -> 4.79  
[31:59] Using charge balance adjust  
[31:59] Dispensed 0.000212 mL of Acid (0.5 M HCl)  
[32:19] Stirrer speed set to 0  
[32:52] Datapoint id 25 collected  
[32:52] Charge balance equation is out by 145.5%  
[32:52] Stirrer speed set to 50  
[32:57] pH 4.51 -> 4.31

Sample name: **M08\_octanol**  
Assay name: **pH-metric high logP**  
Assay ID: **18C-02009**  
Filename: **C:\Sirius\_T3\Mehtap\20180302\_exp29\_logP\_T3-2\18C-02009\_M08\_octanol\_pH-metric high logP.t3r**

Experiment start time: **3/2/2018 8:29:22 PM**  
Analyst: **Pion**  
Instrument ID: **T312060**

## Experiment Log (continued)

[32:57] Using cautious pH adjust  
[32:57] Dispensed 0.000071 mL of Acid (0.5 M HCl)  
[33:02] Stepping pH = 4.40  
[33:02] Dispensed 0.000047 mL of Acid (0.5 M HCl)  
[33:07] Stepping pH = 4.32  
[33:22] Stirrer speed set to 0  
[33:48] Datapoint id 26 collected  
[33:48] Charge balance equation is out by 19.0%  
[33:48] Stirrer speed set to 50  
[33:53] pH 4.31 -> 4.11  
[33:53] Using cautious pH adjust  
[33:53] Dispensed 0.000071 mL of Acid (0.5 M HCl)  
[33:58] Stepping pH = 4.21  
[33:58] Dispensed 0.000047 mL of Acid (0.5 M HCl)  
[34:03] Stepping pH = 4.14  
[34:03] Dispensed 0.000024 mL of Acid (0.5 M HCl)  
[34:08] Stepping pH = 4.12  
[34:24] Stirrer speed set to 0  
[34:34] Datapoint id 27 collected  
[34:34] Charge balance equation is out by 1.1%  
[34:34] Stirrer speed set to 50  
[34:39] pH 4.11 -> 3.91  
[34:39] Using charge balance adjust  
[34:39] Dispensed 0.000212 mL of Acid (0.5 M HCl)  
[34:59] Stirrer speed set to 0  
[35:09] Datapoint id 28 collected  
[35:10] Charge balance equation is out by 21.2%  
[35:10] Stirrer speed set to 50  
[35:15] pH 3.87 -> 3.67  
[35:15] Using cautious pH adjust  
[35:15] Dispensed 0.000165 mL of Acid (0.5 M HCl)  
[35:20] Stepping pH = 3.76  
[35:20] Dispensed 0.000094 mL of Acid (0.5 M HCl)  
[35:25] Stepping pH = 3.71  
[35:25] Dispensed 0.000047 mL of Acid (0.5 M HCl)  
[35:30] Stepping pH = 3.69  
[35:30] Dispensed 0.000047 mL of Acid (0.5 M HCl)  
[35:35] Stepping pH = 3.67  
[35:50] Stirrer speed set to 0  
[36:00] Datapoint id 29 collected  
[36:00] Charge balance equation is out by -14.5%  
[36:00] Stirrer speed set to 50  
[36:05] pH 3.67 -> 3.47  
[36:05] Using charge balance adjust  
[36:06] Dispensed 0.000494 mL of Acid (0.5 M HCl)  
[36:26] Stirrer speed set to 0  
[36:36] Datapoint id 30 collected  
[36:36] Charge balance equation is out by 10.8%  
[36:36] Stirrer speed set to 50  
[36:41] pH 3.45 -> 3.25  
[36:41] Using charge balance adjust  
[36:41] Dispensed 0.000800 mL of Acid (0.5 M HCl)  
[37:02] Stirrer speed set to 0  
[37:12] Datapoint id 31 collected  
[37:12] Charge balance equation is out by 0.6%  
[37:12] Stirrer speed set to 50  
[37:17] pH 3.26 -> 3.06  
[37:17] Using charge balance adjust  
[37:17] Dispensed 0.001270 mL of Acid (0.5 M HCl)



Sample name: **M08\_octanol**  
Assay name: **pH-metric high logP**  
Assay ID: **18C-02009**  
Filename: **C:\Sirius\_T3\Mehtap\20180302\_exp29\_logP\_T3-2\18C-02009\_M08\_octanol\_pH-metric high logP.t3r**

Experiment start time: **3/2/2018 8:29:22 PM**  
Analyst: **Pion**  
Instrument ID: **T312060**

## Experiment Log (continued)

[37:37] Stirrer speed set to 0  
[37:47] Datapoint id 32 collected  
[37:47] Charge balance equation is out by -2.6%  
[37:47] Stirrer speed set to 50  
[37:52] pH 3.07 -> 2.87  
[37:52] Using charge balance adjust  
[37:52] Dispensed 0.001952 mL of Acid (0.5 M HCl)  
[38:13] Stirrer speed set to 0  
[38:23] Datapoint id 33 collected  
[38:23] Charge balance equation is out by -7.9%  
[38:23] Stirrer speed set to 50  
[38:28] pH 2.89 -> 2.69  
[38:28] Using charge balance adjust  
[38:28] Dispensed 0.002963 mL of Acid (0.5 M HCl)  
[38:48] Stirrer speed set to 0  
[38:58] Datapoint id 34 collected  
[38:58] Charge balance equation is out by -8.0%  
[38:58] Stirrer speed set to 50  
[39:03] pH 2.71 -> 2.51  
[39:03] Using charge balance adjust  
[39:04] Dispensed 0.004492 mL of Acid (0.5 M HCl)  
[39:24] Stirrer speed set to 0  
[39:34] Datapoint id 35 collected  
[39:34] Charge balance equation is out by -8.4%  
[39:34] Stirrer speed set to 50  
[39:39] pH 2.54 -> 2.34  
[39:39] Using charge balance adjust  
[39:39] Dispensed 0.006844 mL of Acid (0.5 M HCl)  
[39:59] Stirrer speed set to 0  
[40:09] Datapoint id 36 collected  
[40:09] Charge balance equation is out by -3.3%  
[40:09] Stirrer speed set to 50  
[40:15] pH 2.35 -> 2.15  
[40:15] Using charge balance adjust  
[40:15] Dispensed 0.010724 mL of Acid (0.5 M HCl)  
[40:35] Stirrer speed set to 0  
[40:45] Datapoint id 37 collected  
[40:45] Charge balance equation is out by -4.4%  
[40:45] Stirrer speed set to 50  
[40:50] pH 2.16 -> 1.96  
[40:50] Using charge balance adjust  
[40:51] Dispensed 0.016886 mL of Acid (0.5 M HCl)  
[41:11] Stirrer speed set to 0  
[41:22] Datapoint id 38 collected  
[41:22] Charge balance equation is out by -3.8%  
[41:22] Titration 2 of 3  
[41:22] Adding initial titrants  
[41:22] Automatically add 0.20000 mL of Octanol  
[41:26] Dispensed 0.200000 mL of Octanol  
[41:26] Stirrer speed set to 10  
[41:27] Stirrer speed set to 55  
[41:27] Iterative adjust 1.97 -> 10.00  
[41:27] pH 1.97 -> 10.00  
[41:29] Dispensed 0.051670 mL of Base (0.5 M KOH)  
[42:19] Stirrer speed set to 0  
[43:19] Datapoint id 39 collected  
[43:19] Stirrer speed set to 55  
[43:24] pH 7.36 -> 7.16  
[43:24] Using cautious pH adjust

Sample name: **M08\_octanol**  
Assay name: **pH-metric high logP**  
Assay ID: **18C-02009**  
Filename: **C:\Sirius\_T3\Mehtap\20180302\_exp29\_logP\_T3-2\18C-02009\_M08\_octanol\_pH-metric high logP.t3r**

Experiment start time: **3/2/2018 8:29:22 PM**  
Analyst: **Pion**  
Instrument ID: **T312060**

## Experiment Log (continued)

[43:24] Dispensed 0.000212 mL of Acid (0.5 M HCl)  
[43:29] Stepping pH = 7.24  
[43:29] Dispensed 0.000118 mL of Acid (0.5 M HCl)  
[43:34] Stepping pH = 7.17  
[43:49] Stirrer speed set to 0  
[44:26] Datapoint id 40 collected  
[44:26] Charge balance equation is out by 21.6%  
[44:26] Stirrer speed set to 55  
[44:31] pH 7.10 -> 6.90  
[44:31] Using cautious pH adjust  
[44:31] Dispensed 0.000306 mL of Acid (0.5 M HCl)  
[44:36] Stepping pH = 6.94  
[44:36] Dispensed 0.000094 mL of Acid (0.5 M HCl)  
[44:41] Stepping pH = 6.93  
[44:42] Dispensed 0.000094 mL of Acid (0.5 M HCl)  
[44:47] Stepping pH = 6.89  
[45:02] Stirrer speed set to 0  
[45:23] Datapoint id 41 collected  
[45:23] Charge balance equation is out by 21.8%  
[45:23] Stirrer speed set to 55  
[45:28] pH 6.89 -> 6.69  
[45:28] Using cautious pH adjust  
[45:28] Dispensed 0.000376 mL of Acid (0.5 M HCl)  
[45:33] Stepping pH = 6.72  
[45:33] Dispensed 0.000047 mL of Acid (0.5 M HCl)  
[45:38] Stepping pH = 6.74  
[45:38] Dispensed 0.000447 mL of Acid (0.5 M HCl)  
[45:43] Stepping pH = 6.56  
[45:58] Stirrer speed set to 0  
[46:25] Datapoint id 42 collected  
[46:25] Charge balance equation is out by -19.0%  
[46:25] Stirrer speed set to 55  
[46:30] pH 6.59 -> 6.39  
[46:30] Using cautious pH adjust  
[46:30] Dispensed 0.000400 mL of Acid (0.5 M HCl)  
[46:35] Stepping pH = 6.44  
[46:35] Dispensed 0.000141 mL of Acid (0.5 M HCl)  
[46:40] Stepping pH = 6.41  
[46:41] Dispensed 0.000071 mL of Acid (0.5 M HCl)  
[46:46] Stepping pH = 6.39  
[47:01] Stirrer speed set to 0  
[47:28] Datapoint id 43 collected  
[47:28] Charge balance equation is out by 24.6%  
[47:28] Stirrer speed set to 55  
[47:33] pH 6.41 -> 6.21  
[47:33] Using cautious pH adjust  
[47:33] Dispensed 0.000376 mL of Acid (0.5 M HCl)  
[47:38] Stepping pH = 6.25  
[47:38] Dispensed 0.000071 mL of Acid (0.5 M HCl)  
[47:43] Stepping pH = 6.24  
[47:43] Dispensed 0.000071 mL of Acid (0.5 M HCl)  
[47:48] Stepping pH = 6.21  
[48:03] Stirrer speed set to 0  
[48:29] Datapoint id 44 collected  
[48:29] Charge balance equation is out by 30.2%  
[48:29] Stirrer speed set to 55  
[48:34] pH 6.24 -> 6.04  
[48:34] Using cautious pH adjust  
[48:34] Dispensed 0.000329 mL of Acid (0.5 M HCl)

Sample name: **M08\_octanol**  
Assay name: **pH-metric high logP**  
Assay ID: **18C-02009**  
Filename: **C:\Sirius\_T3\Mehtap\20180302\_exp29\_logP\_T3-2\18C-02009\_M08\_octanol\_pH-metric high logP.t3r**

Experiment start time: **3/2/2018 8:29:22 PM**  
Analyst: **Pion**  
Instrument ID: **T312060**

## Experiment Log (continued)

[48:39] Stepping pH = 6.06  
[48:39] Dispensed 0.000047 mL of Acid (0.5 M HCl)  
[48:44] Stepping pH = 6.06  
[48:44] Dispensed 0.000071 mL of Acid (0.5 M HCl)  
[48:49] Stepping pH = 6.02  
[49:04] Stirrer speed set to 0  
[49:31] Datapoint id 45 collected  
[49:31] Charge balance equation is out by 32.8%  
[49:31] Stirrer speed set to 55  
[49:36] pH 6.04 -> 5.84  
[49:36] Using cautious pH adjust  
[49:36] Dispensed 0.000259 mL of Acid (0.5 M HCl)  
[49:41] Stepping pH = 5.87  
[49:41] Dispensed 0.000024 mL of Acid (0.5 M HCl)  
[49:46] Stepping pH = 5.86  
[49:46] Dispensed 0.000071 mL of Acid (0.5 M HCl)  
[49:51] Stepping pH = 5.82  
[50:06] Stirrer speed set to 0  
[50:28] Datapoint id 46 collected  
[50:28] Charge balance equation is out by 30.4%  
[50:28] Stirrer speed set to 55  
[50:34] pH 5.85 -> 5.65  
[50:34] Using cautious pH adjust  
[50:34] Dispensed 0.000188 mL of Acid (0.5 M HCl)  
[50:39] Stepping pH = 5.67  
[50:39] Dispensed 0.000024 mL of Acid (0.5 M HCl)  
[50:44] Stepping pH = 5.68  
[50:44] Dispensed 0.000165 mL of Acid (0.5 M HCl)  
[50:49] Stepping pH = 5.46  
[51:04] Stirrer speed set to 0  
[51:23] Datapoint id 47 collected  
[51:23] Charge balance equation is out by 5.3%  
[51:23] Stirrer speed set to 55  
[51:28] pH 5.48 -> 5.28  
[51:28] Using charge balance adjust  
[51:28] Dispensed 0.000212 mL of Acid (0.5 M HCl)  
[51:49] Stirrer speed set to 0  
[52:05] Datapoint id 48 collected  
[52:05] Charge balance equation is out by 71.8%  
[52:05] Stirrer speed set to 55  
[52:10] pH 5.12 -> 4.92  
[52:10] Using cautious pH adjust  
[52:10] Dispensed 0.000047 mL of Acid (0.5 M HCl)  
[52:15] Stepping pH = 5.10  
[52:15] Dispensed 0.000165 mL of Acid (0.5 M HCl)  
[52:21] Stepping pH = 4.66  
[52:36] Stirrer speed set to 0  
[52:52] Datapoint id 49 collected  
[52:52] Charge balance equation is out by -86.2%  
[52:52] Stirrer speed set to 55  
[52:57] pH 4.66 -> 4.46  
[52:57] Using cautious pH adjust  
[52:57] Dispensed 0.000047 mL of Acid (0.5 M HCl)  
[53:02] Stepping pH = 4.65  
[53:02] Dispensed 0.000118 mL of Acid (0.5 M HCl)  
[53:07] Stepping pH = 4.41  
[53:22] Stirrer speed set to 0  
[53:34] Datapoint id 50 collected  
[53:34] Charge balance equation is out by -89.3%

Sample name: **M08\_octanol**  
Assay name: **pH-metric high logP**  
Assay ID: **18C-02009**  
Filename: **C:\Sirius\_T3\Mehtap\20180302\_exp29\_logP\_T3-2\18C-02009\_M08\_octanol\_pH-metric high logP.t3r**

Experiment start time: **3/2/2018 8:29:22 PM**  
Analyst: **Pion**  
Instrument ID: **T312060**

## Experiment Log (continued)

[53:34] Stirrer speed set to 55  
[53:39] pH 4.40 -> 4.20  
[53:39] Using cautious pH adjust  
[53:39] Dispensed 0.000047 mL of Acid (0.5 M HCl)  
[53:44] Stepping pH = 4.39  
[53:44] Dispensed 0.000165 mL of Acid (0.5 M HCl)  
[53:49] Stepping pH = 4.17  
[54:04] Stirrer speed set to 0  
[54:15] Datapoint id 51 collected  
[54:15] Charge balance equation is out by -92.5%  
[54:15] Stirrer speed set to 55  
[54:20] pH 4.17 -> 3.97  
[54:20] Using cautious pH adjust  
[54:20] Dispensed 0.000094 mL of Acid (0.5 M HCl)  
[54:25] Stepping pH = 4.12  
[54:25] Dispensed 0.000118 mL of Acid (0.5 M HCl)  
[54:30] Stepping pH = 3.99  
[54:30] Dispensed 0.000024 mL of Acid (0.5 M HCl)  
[54:35] Stepping pH = 3.98  
[54:50] Stirrer speed set to 0  
[55:00] Datapoint id 52 collected  
[55:00] Charge balance equation is out by -30.4%  
[55:00] Stirrer speed set to 55  
[55:06] pH 3.98 -> 3.78  
[55:06] Using cautious pH adjust  
[55:06] Dispensed 0.000141 mL of Acid (0.5 M HCl)  
[55:11] Stepping pH = 3.89  
[55:11] Dispensed 0.000118 mL of Acid (0.5 M HCl)  
[55:16] Stepping pH = 3.82  
[55:16] Dispensed 0.000047 mL of Acid (0.5 M HCl)  
[55:21] Stepping pH = 3.80  
[55:21] Dispensed 0.000047 mL of Acid (0.5 M HCl)  
[55:26] Stepping pH = 3.78  
[55:41] Stirrer speed set to 0  
[55:51] Datapoint id 53 collected  
[55:51] Charge balance equation is out by -27.9%  
[55:51] Stirrer speed set to 55  
[55:56] pH 3.78 -> 3.58  
[55:56] Using cautious pH adjust  
[55:56] Dispensed 0.000212 mL of Acid (0.5 M HCl)  
[56:02] Stepping pH = 3.67  
[56:02] Dispensed 0.000141 mL of Acid (0.5 M HCl)  
[56:07] Stepping pH = 3.62  
[56:07] Dispensed 0.000094 mL of Acid (0.5 M HCl)  
[56:12] Stepping pH = 3.59  
[56:12] Dispensed 0.000024 mL of Acid (0.5 M HCl)  
[56:17] Stepping pH = 3.59  
[56:32] Stirrer speed set to 0  
[56:42] Datapoint id 54 collected  
[56:42] Charge balance equation is out by -15.7%  
[56:42] Stirrer speed set to 55  
[56:47] pH 3.59 -> 3.39  
[56:47] Using cautious pH adjust  
[56:47] Dispensed 0.000306 mL of Acid (0.5 M HCl)  
[56:52] Stepping pH = 3.50  
[56:53] Dispensed 0.000282 mL of Acid (0.5 M HCl)  
[56:58] Stepping pH = 3.41  
[56:58] Dispensed 0.000071 mL of Acid (0.5 M HCl)  
[57:03] Stepping pH = 3.40

Sample name: **M08\_octanol**  
Assay name: **pH-metric high logP**  
Assay ID: **18C-02009**  
Filename: **C:\Sirius\_T3\Mehtap\20180302\_exp29\_logP\_T3-2\18C-02009\_M08\_octanol\_pH-metric high logP.t3r**

Experiment start time: **3/2/2018 8:29:22 PM**  
Analyst: **Pion**  
Instrument ID: **T312060**

## Experiment Log (continued)

[57:03] Dispensed 0.000094 mL of Acid (0.5 M HCl)  
[57:08] Stepping pH = 3.38  
[57:23] Stirrer speed set to 0  
[57:33] Datapoint id 55 collected  
[57:33] Charge balance equation is out by -22.9%  
[57:33] Stirrer speed set to 55  
[57:38] pH 3.38 -> 3.18  
[57:38] Using cautious pH adjust  
[57:38] Dispensed 0.000517 mL of Acid (0.5 M HCl)  
[57:43] Stepping pH = 3.26  
[57:43] Dispensed 0.000282 mL of Acid (0.5 M HCl)  
[57:49] Stepping pH = 3.21  
[57:49] Dispensed 0.000165 mL of Acid (0.5 M HCl)  
[57:54] Stepping pH = 3.19  
[58:09] Stirrer speed set to 0  
[58:19] Datapoint id 56 collected  
[58:19] Charge balance equation is out by 5.3%  
[58:19] Stirrer speed set to 55  
[58:24] pH 3.19 -> 2.99  
[58:24] Using charge balance adjust  
[58:24] Dispensed 0.001576 mL of Acid (0.5 M HCl)  
[58:44] Stirrer speed set to 0  
[58:54] Datapoint id 57 collected  
[58:54] Charge balance equation is out by -0.7%  
[58:54] Stirrer speed set to 55  
[58:59] pH 3.00 -> 2.80  
[58:59] Using charge balance adjust  
[59:00] Dispensed 0.002469 mL of Acid (0.5 M HCl)  
[59:20] Stirrer speed set to 0  
[59:30] Datapoint id 58 collected  
[59:30] Charge balance equation is out by -1.6%  
[59:30] Stirrer speed set to 55  
[59:35] pH 2.81 -> 2.61  
[59:35] Using charge balance adjust  
[59:35] Dispensed 0.003881 mL of Acid (0.5 M HCl)  
[59:55] Stirrer speed set to 0  
[1:00:05] Datapoint id 59 collected  
[1:00:05] Charge balance equation is out by -2.2%  
[1:00:05] Stirrer speed set to 55  
[1:00:10] pH 2.61 -> 2.41  
[1:00:10] Using charge balance adjust  
[1:00:11] Dispensed 0.006091 mL of Acid (0.5 M HCl)  
[1:00:31] Stirrer speed set to 0  
[1:00:41] Datapoint id 60 collected  
[1:00:41] Charge balance equation is out by -0.3%  
[1:00:41] Stirrer speed set to 55  
[1:00:46] pH 2.42 -> 2.22  
[1:00:46] Using charge balance adjust  
[1:00:46] Dispensed 0.009690 mL of Acid (0.5 M HCl)  
[1:01:07] Stirrer speed set to 0  
[1:01:17] Datapoint id 61 collected  
[1:01:17] Charge balance equation is out by -8.4%  
[1:01:17] Stirrer speed set to 55  
[1:01:22] pH 2.24 -> 2.04  
[1:01:22] Using charge balance adjust  
[1:01:22] Dispensed 0.014981 mL of Acid (0.5 M HCl)  
[1:01:42] Stirrer speed set to 0  
[1:01:52] Datapoint id 62 collected  
[1:01:52] Charge balance equation is out by -3.3%

Sample name: **M08\_octanol**  
Assay name: **pH-metric high logP**  
Assay ID: **18C-02009**  
Filename: **C:\Sirius\_T3\Mehtap\20180302\_exp29\_logP\_T3-2\18C-02009\_M08\_octanol\_pH-metric high logP.t3r**

Experiment start time: **3/2/2018 8:29:22 PM**  
Analyst: **Pion**  
Instrument ID: **T312060**

## Experiment Log (continued)

[1:01:52] Stirrer speed set to 55  
[1:01:58] pH 2.05 -> 1.95  
[1:01:58] Using charge balance adjust  
[1:01:58] Dispensed 0.010395 mL of Acid (0.5 M HCl)  
[1:02:18] Stirrer speed set to 0  
[1:02:28] Datapoint id 63 collected  
[1:02:28] Charge balance equation is out by -51.4%  
[1:02:28] Titration 3 of 3  
[1:02:28] Adding initial titrants  
[1:02:28] Automatically add 0.80000 mL of Octanol  
[1:03:18] Dispensed 0.800000 mL of Octanol  
[1:03:18] Stirrer speed set to 10  
[1:03:19] Stirrer speed set to 60  
[1:03:19] Iterative adjust 1.94 -> 10.00  
[1:03:19] pH 1.94 -> 10.00  
[1:03:21] Dispensed 0.058137 mL of Base (0.5 M KOH)  
[1:04:11] Stirrer speed set to 0  
[1:05:11] Datapoint id 64 collected  
[1:05:11] Stirrer speed set to 60  
[1:05:16] pH 8.61 -> 8.41  
[1:05:16] Using cautious pH adjust  
[1:05:16] Dispensed 0.000071 mL of Acid (0.5 M HCl)  
[1:05:21] Stepping pH = 8.48  
[1:05:21] Dispensed 0.000024 mL of Acid (0.5 M HCl)  
[1:05:26] Stepping pH = 8.35  
[1:05:42] Stirrer speed set to 0  
[1:06:42] Datapoint id 65 collected  
[1:06:42] Charge balance equation is out by 28.7%  
[1:06:42] Stirrer speed set to 60  
[1:06:47] pH 7.80 -> 7.60  
[1:06:47] Using cautious pH adjust  
[1:06:47] Dispensed 0.000259 mL of Acid (0.5 M HCl)  
[1:06:52] Stepping pH = 7.65  
[1:06:52] Dispensed 0.000071 mL of Acid (0.5 M HCl)  
[1:06:57] Stepping pH = 7.62  
[1:06:57] Dispensed 0.000047 mL of Acid (0.5 M HCl)  
[1:07:02] Stepping pH = 7.60  
[1:07:17] Stirrer speed set to 0  
[1:07:38] Datapoint id 66 collected  
[1:07:38] Charge balance equation is out by 24.0%  
[1:07:38] Stirrer speed set to 60  
[1:07:43] pH 7.54 -> 7.34  
[1:07:43] Using cautious pH adjust  
[1:07:43] Dispensed 0.000329 mL of Acid (0.5 M HCl)  
[1:07:48] Stepping pH = 7.40  
[1:07:48] Dispensed 0.000141 mL of Acid (0.5 M HCl)  
[1:07:53] Stepping pH = 7.36  
[1:07:53] Dispensed 0.000047 mL of Acid (0.5 M HCl)  
[1:07:58] Stepping pH = 7.35  
[1:08:13] Stirrer speed set to 0  
[1:08:39] Datapoint id 67 collected  
[1:08:39] Charge balance equation is out by 23.3%  
[1:08:39] Stirrer speed set to 60  
[1:08:44] pH 7.32 -> 7.12  
[1:08:44] Using cautious pH adjust  
[1:08:44] Dispensed 0.000400 mL of Acid (0.5 M HCl)  
[1:08:49] Stepping pH = 7.18  
[1:08:49] Dispensed 0.000165 mL of Acid (0.5 M HCl)  
[1:08:54] Stepping pH = 7.14



Sample name: **M08\_octanol**  
Assay name: **pH-metric high logP**  
Assay ID: **18C-02009**  
Filename: **C:\Sirius\_T3\Mehtap\20180302\_exp29\_logP\_T3-2\18C-02009\_M08\_octanol\_pH-metric high logP.t3r**

Experiment start time: **3/2/2018 8:29:22 PM**  
Analyst: **Pion**  
Instrument ID: **T312060**

## Experiment Log (continued)

[1:08:54] Dispensed 0.000071 mL of Acid (0.5 M HCl)  
[1:08:59] Stepping pH = 7.12  
[1:09:14] Stirrer speed set to 0  
[1:09:39] Datapoint id 68 collected  
[1:09:39] Charge balance equation is out by 21.8%  
[1:09:39] Stirrer speed set to 60  
[1:09:44] pH 7.11 -> 6.91  
[1:09:44] Using cautious pH adjust  
[1:09:44] Dispensed 0.000400 mL of Acid (0.5 M HCl)  
[1:09:49] Stepping pH = 6.98  
[1:09:49] Dispensed 0.000165 mL of Acid (0.5 M HCl)  
[1:09:54] Stepping pH = 6.94  
[1:09:54] Dispensed 0.000094 mL of Acid (0.5 M HCl)  
[1:09:59] Stepping pH = 6.92  
[1:10:15] Stirrer speed set to 0  
[1:10:46] Datapoint id 69 collected  
[1:10:46] Charge balance equation is out by 16.7%  
[1:10:46] Stirrer speed set to 60  
[1:10:51] pH 6.92 -> 6.72  
[1:10:51] Using cautious pH adjust  
[1:10:51] Dispensed 0.000376 mL of Acid (0.5 M HCl)  
[1:10:56] Stepping pH = 6.79  
[1:10:56] Dispensed 0.000165 mL of Acid (0.5 M HCl)  
[1:11:02] Stepping pH = 6.74  
[1:11:02] Dispensed 0.000071 mL of Acid (0.5 M HCl)  
[1:11:07] Stepping pH = 6.73  
[1:11:07] Dispensed 0.000071 mL of Acid (0.5 M HCl)  
[1:11:12] Stepping pH = 6.71  
[1:11:27] Stirrer speed set to 0  
[1:11:59] Datapoint id 70 collected  
[1:11:59] Charge balance equation is out by 9.2%  
[1:11:59] Stirrer speed set to 60  
[1:12:04] pH 6.71 -> 6.51  
[1:12:04] Using charge balance adjust  
[1:12:04] Dispensed 0.000611 mL of Acid (0.5 M HCl)  
[1:12:24] Stirrer speed set to 0  
[1:13:09] Datapoint id 71 collected  
[1:13:09] Charge balance equation is out by -12.8%  
[1:13:09] Stirrer speed set to 60  
[1:13:14] pH 6.46 -> 6.26  
[1:13:14] Using charge balance adjust  
[1:13:14] Dispensed 0.000447 mL of Acid (0.5 M HCl)  
[1:13:34] Stirrer speed set to 0  
[1:14:15] Datapoint id 72 collected  
[1:14:15] Charge balance equation is out by -34.1%  
[1:14:15] Stirrer speed set to 60  
[1:14:20] pH 6.25 -> 6.05  
[1:14:20] Using cautious pH adjust  
[1:14:20] Dispensed 0.000165 mL of Acid (0.5 M HCl)  
[1:14:25] Stepping pH = 6.17  
[1:14:25] Dispensed 0.000141 mL of Acid (0.5 M HCl)  
[1:14:30] Stepping pH = 6.07  
[1:14:30] Dispensed 0.000024 mL of Acid (0.5 M HCl)  
[1:14:36] Stepping pH = 6.06  
[1:14:36] Dispensed 0.000024 mL of Acid (0.5 M HCl)  
[1:14:41] Stepping pH = 6.06  
[1:14:41] Dispensed 0.000094 mL of Acid (0.5 M HCl)  
[1:14:46] Stepping pH = 5.98  
[1:15:01] Stirrer speed set to 0

Sample name: **M08\_octanol**  
Assay name: **pH-metric high logP**  
Assay ID: **18C-02009**  
Filename: **C:\Sirius\_T3\Mehtap\20180302\_exp29\_logP\_T3-2\18C-02009\_M08\_octanol\_pH-metric high logP.t3r**

Experiment start time: **3/2/2018 8:29:22 PM**  
Analyst: **Pion**  
Instrument ID: **T312060**

## Experiment Log (continued)

[1:15:24] Datapoint id 73 collected  
[1:15:24] Charge balance equation is out by -45.5%  
[1:15:24] Stirrer speed set to 60  
[1:15:30] pH 5.98 -> 5.78  
[1:15:30] Using cautious pH adjust  
[1:15:30] Dispensed 0.000094 mL of Acid (0.5 M HCl)  
[1:15:35] Stepping pH = 5.91  
[1:15:35] Dispensed 0.000094 mL of Acid (0.5 M HCl)  
[1:15:40] Stepping pH = 5.80  
[1:15:40] Dispensed 0.000024 mL of Acid (0.5 M HCl)  
[1:15:45] Stepping pH = 5.78  
[1:16:00] Stirrer speed set to 0  
[1:16:22] Datapoint id 74 collected  
[1:16:22] Charge balance equation is out by -10.2%  
[1:16:22] Stirrer speed set to 60  
[1:16:27] pH 5.79 -> 5.59  
[1:16:27] Using charge balance adjust  
[1:16:27] Dispensed 0.000141 mL of Acid (0.5 M HCl)  
[1:16:47] Stirrer speed set to 0  
[1:17:11] Datapoint id 75 collected  
[1:17:11] Charge balance equation is out by -22.3%  
[1:17:11] Stirrer speed set to 60  
[1:17:16] pH 5.58 -> 5.38  
[1:17:16] Using cautious pH adjust  
[1:17:16] Dispensed 0.000047 mL of Acid (0.5 M HCl)  
[1:17:21] Stepping pH = 5.54  
[1:17:21] Dispensed 0.000071 mL of Acid (0.5 M HCl)  
[1:17:26] Stepping pH = 5.39  
[1:17:42] Stirrer speed set to 0  
[1:18:00] Datapoint id 76 collected  
[1:18:00] Charge balance equation is out by -38.4%  
[1:18:00] Stirrer speed set to 60  
[1:18:05] pH 5.37 -> 5.17  
[1:18:05] Using cautious pH adjust  
[1:18:05] Dispensed 0.000024 mL of Acid (0.5 M HCl)  
[1:18:10] Stepping pH = 5.38  
[1:18:10] Dispensed 0.000165 mL of Acid (0.5 M HCl)  
[1:18:15] Stepping pH = 4.87  
[1:18:30] Stirrer speed set to 0  
[1:18:53] Datapoint id 77 collected  
[1:18:53] Charge balance equation is out by -202.4%  
[1:18:53] Stirrer speed set to 60  
[1:18:58] pH 4.81 -> 4.61  
[1:18:58] Using cautious pH adjust  
[1:18:58] Dispensed 0.000024 mL of Acid (0.5 M HCl)  
[1:19:03] Stepping pH = 4.80  
[1:19:03] Dispensed 0.000071 mL of Acid (0.5 M HCl)  
[1:19:08] Stepping pH = 4.64  
[1:19:08] Dispensed 0.000024 mL of Acid (0.5 M HCl)  
[1:19:13] Stepping pH = 4.58  
[1:19:28] Stirrer speed set to 0  
[1:19:40] Datapoint id 78 collected  
[1:19:40] Charge balance equation is out by -130.6%  
[1:19:40] Stirrer speed set to 60  
[1:19:45] pH 4.59 -> 4.39  
[1:19:45] Using cautious pH adjust  
[1:19:45] Dispensed 0.000047 mL of Acid (0.5 M HCl)  
[1:19:50] Stepping pH = 4.52  
[1:19:50] Dispensed 0.000047 mL of Acid (0.5 M HCl)



Sample name: **M08\_octanol**  
Assay name: **pH-metric high logP**  
Assay ID: **18C-02009**  
Filename: **C:\Sirius\_T3\Mehtap\20180302\_exp29\_logP\_T3-2\18C-02009\_M08\_octanol\_pH-metric high logP.t3r**

Experiment start time: **3/2/2018 8:29:22 PM**  
Analyst: **Pion**  
Instrument ID: **T312060**

## Experiment Log (continued)

[1:19:55] Stepping pH = 4.40  
[1:20:10] Stirrer speed set to 0  
[1:20:32] Datapoint id 79 collected  
[1:20:32] Charge balance equation is out by -2.3%  
[1:20:32] Stirrer speed set to 60  
[1:20:37] pH 4.39 -> 4.19  
[1:20:37] Using charge balance adjust  
[1:20:37] Dispensed 0.000118 mL of Acid (0.5 M HCl)  
[1:20:57] Stirrer speed set to 0  
[1:21:08] Datapoint id 80 collected  
[1:21:08] Charge balance equation is out by -19.7%  
[1:21:08] Stirrer speed set to 60  
[1:21:13] pH 4.22 -> 4.02  
[1:21:13] Using cautious pH adjust  
[1:21:13] Dispensed 0.000071 mL of Acid (0.5 M HCl)  
[1:21:18] Stepping pH = 4.16  
[1:21:18] Dispensed 0.000094 mL of Acid (0.5 M HCl)  
[1:21:23] Stepping pH = 4.05  
[1:21:23] Dispensed 0.000024 mL of Acid (0.5 M HCl)  
[1:21:28] Stepping pH = 4.03  
[1:21:28] Dispensed 0.000024 mL of Acid (0.5 M HCl)  
[1:21:33] Stepping pH = 4.03  
[1:21:34] Dispensed 0.000047 mL of Acid (0.5 M HCl)  
[1:21:39] Stepping pH = 3.99  
[1:21:54] Stirrer speed set to 0  
[1:22:04] Datapoint id 81 collected  
[1:22:04] Charge balance equation is out by -78.1%  
[1:22:04] Stirrer speed set to 60  
[1:22:09] pH 3.99 -> 3.79  
[1:22:09] Using cautious pH adjust  
[1:22:09] Dispensed 0.000141 mL of Acid (0.5 M HCl)  
[1:22:14] Stepping pH = 3.88  
[1:22:14] Dispensed 0.000094 mL of Acid (0.5 M HCl)  
[1:22:19] Stepping pH = 3.82  
[1:22:19] Dispensed 0.000047 mL of Acid (0.5 M HCl)  
[1:22:24] Stepping pH = 3.80  
[1:22:39] Stirrer speed set to 0  
[1:22:50] Datapoint id 82 collected  
[1:22:50] Charge balance equation is out by 0.9%  
[1:22:50] Stirrer speed set to 60  
[1:22:55] pH 3.80 -> 3.60  
[1:22:55] Using charge balance adjust  
[1:22:55] Dispensed 0.000423 mL of Acid (0.5 M HCl)  
[1:23:15] Stirrer speed set to 0  
[1:23:25] Datapoint id 83 collected  
[1:23:25] Charge balance equation is out by 2.4%  
[1:23:25] Stirrer speed set to 60  
[1:23:31] pH 3.59 -> 3.39  
[1:23:31] Using charge balance adjust  
[1:23:31] Dispensed 0.000659 mL of Acid (0.5 M HCl)  
[1:23:51] Stirrer speed set to 0  
[1:24:09] Datapoint id 84 collected  
[1:24:09] Charge balance equation is out by -5.5%  
[1:24:09] Stirrer speed set to 60  
[1:24:14] pH 3.41 -> 3.21  
[1:24:14] Using charge balance adjust  
[1:24:14] Dispensed 0.001035 mL of Acid (0.5 M HCl)  
[1:24:34] Stirrer speed set to 0  
[1:25:00] Datapoint id 85 collected

Sample name: **M08\_octanol**  
Assay name: **pH-metric high logP**  
Assay ID: **18C-02009**  
Filename: **C:\Sirius\_T3\Mehtap\20180302\_exp29\_logP\_T3-2\18C-02009\_M08\_octanol\_pH-metric high logP.t3r**

Experiment start time: **3/2/2018 8:29:22 PM**  
Analyst: **Pion**  
Instrument ID: **T312060**

## Experiment Log (continued)

[1:25:00] Charge balance equation is out by -3.2%  
[1:25:00] Stirrer speed set to 60  
[1:25:05] pH 3.22 -> 3.02  
[1:25:05] Using charge balance adjust  
[1:25:05] Dispensed 0.001599 mL of Acid (0.5 M HCl)  
[1:25:25] Stirrer speed set to 0  
[1:25:36] Datapoint id 86 collected  
[1:25:36] Charge balance equation is out by -5.0%  
[1:25:36] Stirrer speed set to 60  
[1:25:41] pH 3.03 -> 2.83  
[1:25:41] Using charge balance adjust  
[1:25:41] Dispensed 0.002422 mL of Acid (0.5 M HCl)  
[1:26:01] Stirrer speed set to 0  
[1:26:26] Datapoint id 87 collected  
[1:26:26] Charge balance equation is out by -7.8%  
[1:26:26] Stirrer speed set to 60  
[1:26:32] pH 2.85 -> 2.65  
[1:26:32] Using charge balance adjust  
[1:26:32] Dispensed 0.003716 mL of Acid (0.5 M HCl)  
[1:26:52] Stirrer speed set to 0  
[1:27:02] Datapoint id 88 collected  
[1:27:02] Charge balance equation is out by -9.4%  
[1:27:02] Stirrer speed set to 60  
[1:27:07] pH 2.68 -> 2.48  
[1:27:07] Using charge balance adjust  
[1:27:07] Dispensed 0.005621 mL of Acid (0.5 M HCl)  
[1:27:27] Stirrer speed set to 0  
[1:27:52] Datapoint id 89 collected  
[1:27:52] Charge balance equation is out by 0.3%  
[1:27:52] Stirrer speed set to 60  
[1:27:57] pH 2.48 -> 2.28  
[1:27:57] Using charge balance adjust  
[1:27:58] Dispensed 0.008937 mL of Acid (0.5 M HCl)  
[1:28:18] Stirrer speed set to 0  
[1:28:31] Datapoint id 90 collected  
[1:28:31] Charge balance equation is out by -2.8%  
[1:28:31] Stirrer speed set to 60  
[1:28:36] pH 2.29 -> 2.09  
[1:28:36] Using charge balance adjust  
[1:28:37] Dispensed 0.014087 mL of Acid (0.5 M HCl)  
[1:28:57] Stirrer speed set to 0  
[1:29:18] Datapoint id 91 collected  
[1:29:18] Charge balance equation is out by -3.5%  
[1:29:18] Stirrer speed set to 60  
[1:29:23] pH 2.10 -> 1.95  
[1:29:23] Using charge balance adjust  
[1:29:23] Dispensed 0.016157 mL of Acid (0.5 M HCl)  
[1:29:43] Stirrer speed set to 0  
[1:30:03] Datapoint id 92 collected  
[1:30:03] Charge balance equation is out by -25.8%  
[1:30:03] Argon flow rate set to 0  
[1:30:07] Titrator arm moved over Titration position
