# Supplementary material for: Octanol-water partition coefficient measurements for the SAMPL6 Blind Prediction Challenge
Source: bioRxiv or medRxiv preprint supplement (doi:10.1101/757393), 2019-12-02
Supplement: Supplementary file [file media-2.zip]

Sample name: **M11\_octanol**  
 Assay name: **pH-metric high logP**  
 Assay ID: **18C-01002**  
 Filename: **C:\Sirius\_T3\Mehtap\20180228\_exp28\_logP\_T3-2\18C-01002\_M11\_octanol\_pH-metric high logP.t3r**

Experiment start time: **3/1/2018 1:21:08 AM**  
 Analyst: **Pion**  
 Instrument ID: **T312060**

## pH-metric Result

logP (XH +) -3.66 ±2.11 (n=50)  
 logP (neutral X) 2.01 ±0.02 (n=50)

### 18C-01002 Points 1 to 28

M11\_octanol concentration factor 0.940  
 Carbonate 0.0379 mM  
 Acidity error 0.00456 mM

### 18C-01002 Points 29 to 49

M11\_octanol concentration factor 0.777  
 Carbonate 0.1154 mM  
 Acidity error -0.46703 mM

### 18C-01002 Points 50 to 75

M11\_octanol concentration factor 0.713  
 Carbonate 0.1025 mM  
 Acidity error -1.33190 mM

## Warnings and errors

Errors None  
 Warnings One or more logP values out of range

## Sample logD and percent species

| pH     | M11_octanol<br>logD | M11_octanol<br>M11_octanolH | M11_octanol<br>M11_octanol | M11_octanol<br>M11_octanolH* | M11_octanol<br>M11_octanol* | Comment    |
|--------|---------------------|-----------------------------|----------------------------|------------------------------|-----------------------------|------------|
| 1.000  | -0.88               | 88.32 %                     | 0.11 %                     | 0.02 %                       | 11.55 %                     | Stomach pH |
| 1.200  | -0.68               | 82.68 %                     | 0.17 %                     | 0.02 %                       | 17.13 %                     |            |
| 2.000  | 0.11                | 43.10 %                     | 0.56 %                     | 0.01 %                       | 56.34 %                     |            |
| 3.000  | 1.06                | 7.04 %                      | 0.91 %                     | 0.00 %                       | 92.05 %                     |            |
| 4.000  | 1.76                | 0.75 %                      | 0.97 %                     | 0.00 %                       | 98.28 %                     |            |
| 5.000  | 1.97                | 0.08 %                      | 0.98 %                     | 0.00 %                       | 98.95 %                     | Blood pH   |
| 6.000  | 2.00                | 0.01 %                      | 0.98 %                     | 0.00 %                       | 99.02 %                     |            |
| 6.500  | 2.01                | 0.00 %                      | 0.98 %                     | 0.00 %                       | 99.02 %                     |            |
| 7.000  | 2.01                | 0.00 %                      | 0.98 %                     | 0.00 %                       | 99.02 %                     |            |
| 7.400  | 2.01                | 0.00 %                      | 0.98 %                     | 0.00 %                       | 99.02 %                     |            |
| 8.000  | 2.01                | 0.00 %                      | 0.98 %                     | 0.00 %                       | 99.02 %                     |            |
| 9.000  | 2.01                | 0.00 %                      | 0.98 %                     | 0.00 %                       | 99.02 %                     |            |
| 10.000 | 2.01                | 0.00 %                      | 0.98 %                     | 0.00 %                       | 99.02 %                     |            |
| 11.000 | 2.01                | 0.00 %                      | 0.98 %                     | 0.00 %                       | 99.02 %                     |            |
| 12.000 | 2.01                | 0.00 %                      | 0.98 %                     | 0.00 %                       | 99.02 %                     |            |

Sample name: **M11\_octanol**  
 Assay name: **pH-metric high logP**  
 Assay ID: **18C-01002**  
 Filename: **C:\Sirius\_T3\Mehtap\20180228\_exp28\_logP\_T3-2\18C-01002\_M11\_octanol\_pH-metric high logP.t3r**

Experiment start time: **3/1/2018 1:21:08 AM**  
 Analyst: **Pion**  
 Instrument ID: **T312060**

## Graphs

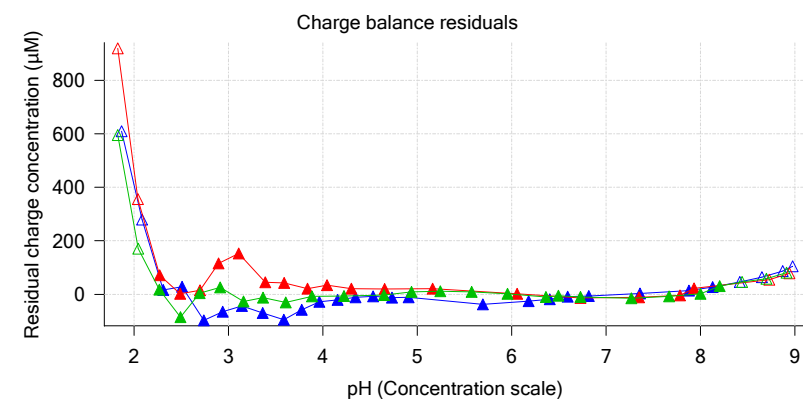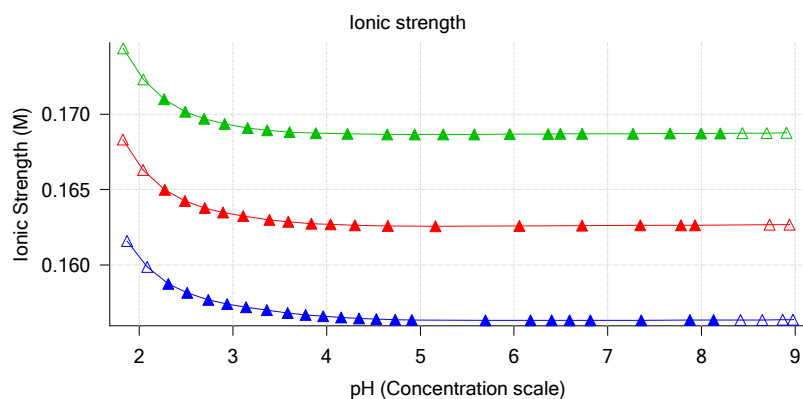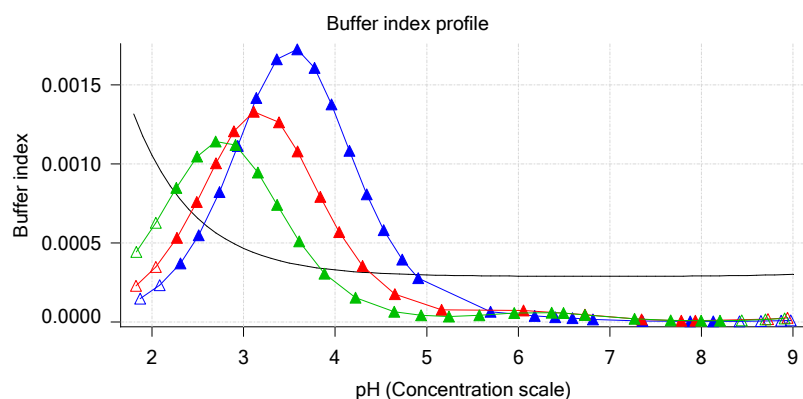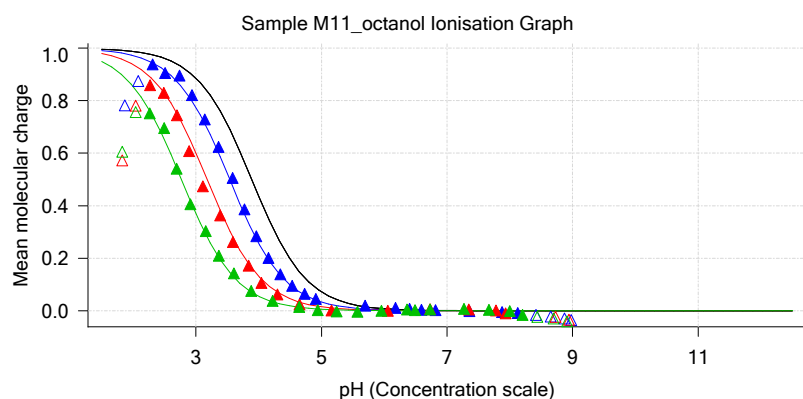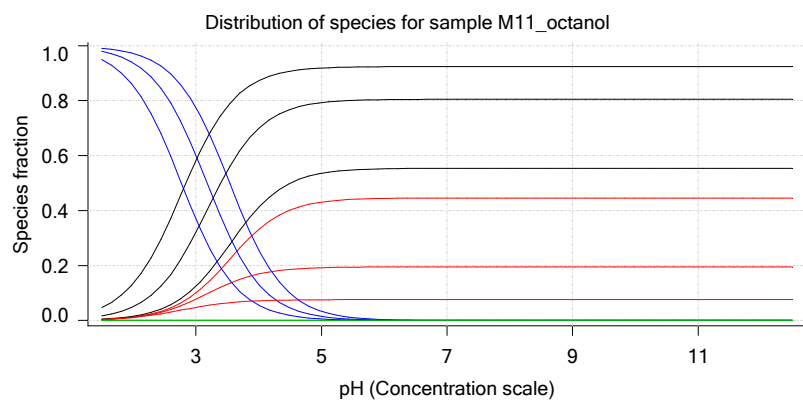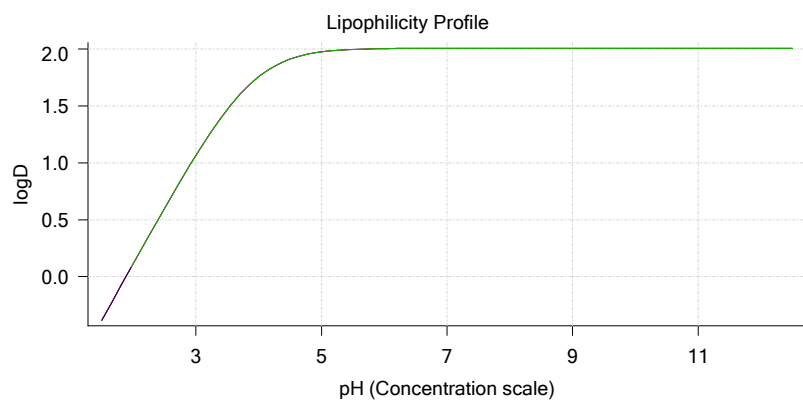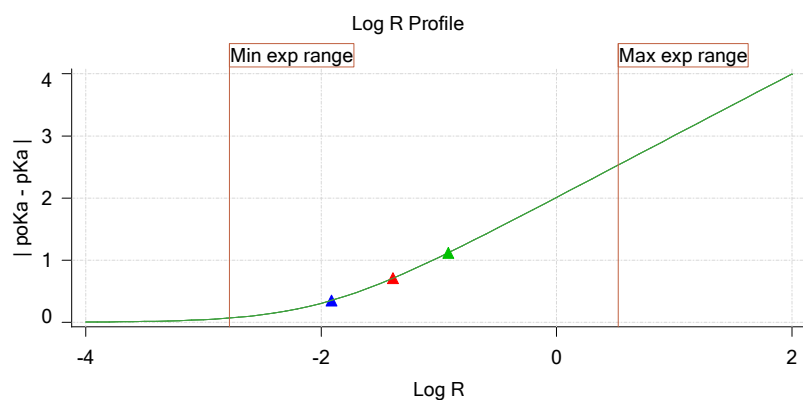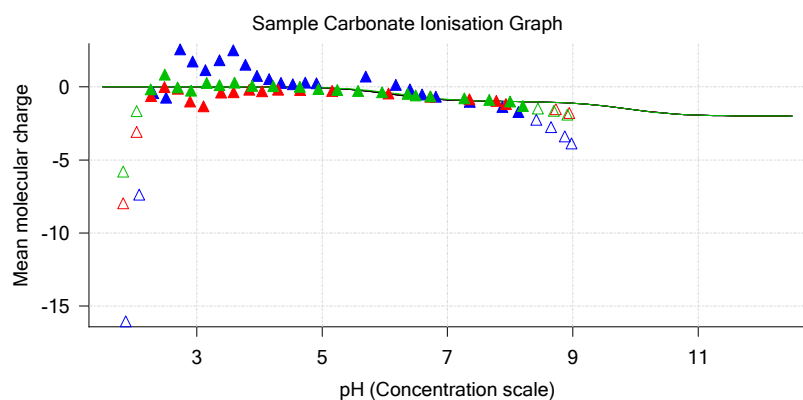

|              |                                                                                                   |                        |                            |
|--------------|---------------------------------------------------------------------------------------------------|------------------------|----------------------------|
| Sample name: | <b>M11_octanol</b>                                                                                | Experiment start time: | <b>3/1/2018 1:21:08 AM</b> |
| Assay name:  | <b>pH-metric high logP</b>                                                                        | Analyst:               | <b>Pion</b>                |
| Assay ID:    | <b>18C-01002</b>                                                                                  | Instrument ID:         | <b>T312060</b>             |
| Filename:    | <b>C:\Sirius_T3\Mehtap\20180228_exp28_logP_T3-2\18C-01002_M11_octanol_pH-metric high logP.t3r</b> |                        |                            |

## Graphs (continued)

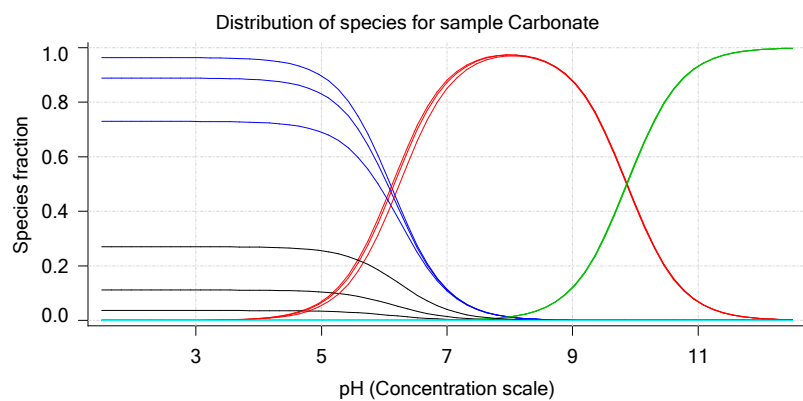

Sample name: **M11\_octanol**  
 Assay name: **pH-metric high logP**  
 Assay ID: **18C-01002**  
 Filename: **C:\Sirius\_T3\Mehtap\20180228\_exp28\_logP\_T3-2\18C-01002\_M11\_octanol\_pH-metric high logP.t3r**

Experiment start time: **3/1/2018 1:21:08 AM**  
 Analyst: **Pion**  
 Instrument ID: **T312060**

## pH-metric high logP Titration 1 of 3 18C-01002 Points 1 to 28

### Overall results

RMSD 0.953  
 Average ionic strength 0.157 M  
 Average temperature 24.9°C  
 Partition ratio 0.0122 : 1  
 Analyte concentration range 3149.9 µM to 3249.9 µM  
 Total points considered 22 of 28

### Warnings and errors

Errors None  
 Warnings One or more logP values out of range

### Four-Plus parameters

Alpha 0.130 3/1/2018 1:21:08 AM C:\Sirius\_T3\HCl18B27.t3r  
 S 0.9970 3/1/2018 1:21:08 AM C:\Sirius\_T3\HCl18B27.t3r  
 jH 0.8 3/1/2018 1:21:08 AM C:\Sirius\_T3\HCl18B27.t3r  
 jOH -0.4 3/1/2018 1:21:08 AM C:\Sirius\_T3\HCl18B27.t3r

### Titrants

0.50 M HCl 0.993513 3/1/2018 1:21:08 AM C:\Sirius\_T3\HCl18B27.t3r  
 0.50 M KOH 0.999845 3/1/2018 1:21:08 AM C:\Sirius\_T3\KOH18B27.t3r

### Sample

M11\_octanol concentration factor 0.940  
 Base pKa 1 3.89  
 logP (XH +) -5.60  
 logP (neutral X) 1.94

### Sample graphs

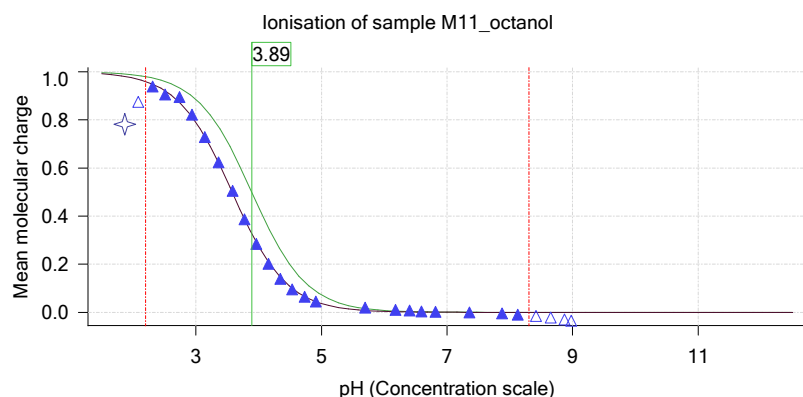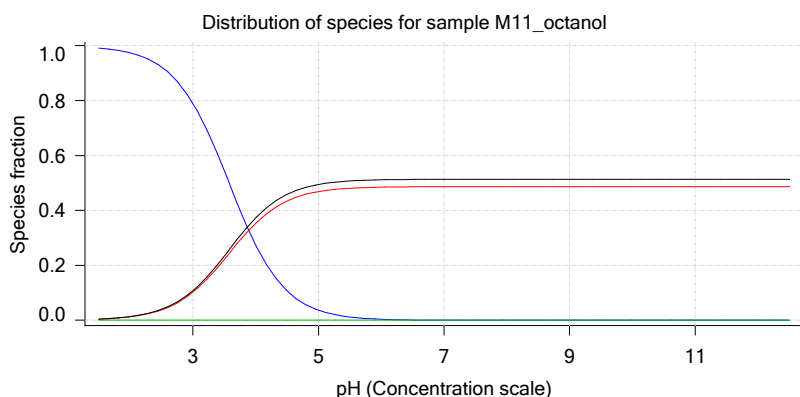

Sample name: **M11\_octanol**  
Assay name: **pH-metric high logP**  
Assay ID: **18C-01002**  
Filename: **C:\Sirius\_T3\Mehtap\20180228\_exp28\_logP\_T3-2\18C-01002\_M11\_octanol\_pH-metric high logP.t3r**

Experiment start time: **3/1/2018 1:21:08 AM**  
Analyst: **Pion**  
Instrument ID: **T312060**

## Sample graphs (continued)

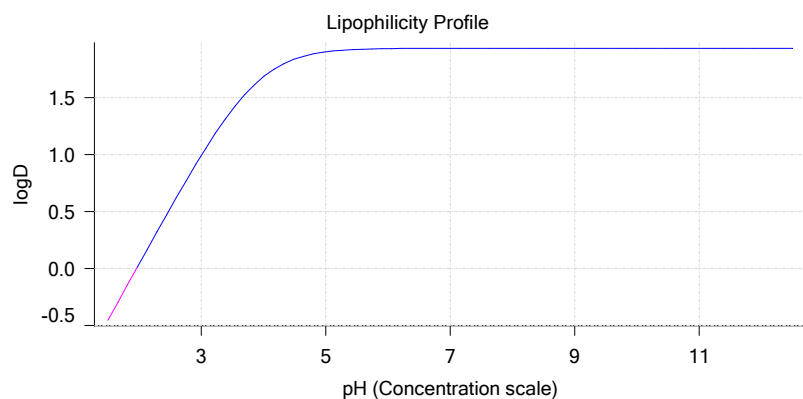

## Sample logD and percent species

| pH     | M11_octanol<br>logD | M11_octanol<br>M11_octanolH | M11_octanol<br>M11_octanolH | M11_octanol<br>M11_octanolH* | M11_octanol<br>M11_octanol* | Comment    |
|--------|---------------------|-----------------------------|-----------------------------|------------------------------|-----------------------------|------------|
| 1.000  | -0.96               | 99.74 %                     | 0.13 %                      | 0.00 %                       | 0.14 %                      | Stomach pH |
| 1.200  | -0.76               | 99.58 %                     | 0.20 %                      | 0.00 %                       | 0.21 %                      |            |
| 2.000  | 0.04                | 97.42 %                     | 1.26 %                      | 0.00 %                       | 1.32 %                      |            |
| 3.000  | 0.99                | 79.07 %                     | 10.19 %                     | 0.00 %                       | 10.74 %                     |            |
| 4.000  | 1.69                | 27.42 %                     | 35.32 %                     | 0.00 %                       | 37.26 %                     |            |
| 5.000  | 1.90                | 3.64 %                      | 46.90 %                     | 0.00 %                       | 49.46 %                     |            |
| 6.000  | 1.93                | 0.38 %                      | 48.48 %                     | 0.00 %                       | 51.14 %                     | Blood pH   |
| 6.500  | 1.93                | 0.12 %                      | 48.61 %                     | 0.00 %                       | 51.27 %                     |            |
| 7.000  | 1.93                | 0.04 %                      | 48.65 %                     | 0.00 %                       | 51.31 %                     |            |
| 7.400  | 1.93                | 0.02 %                      | 48.66 %                     | 0.00 %                       | 51.33 %                     |            |
| 8.000  | 1.94                | 0.00 %                      | 48.67 %                     | 0.00 %                       | 51.33 %                     |            |
| 9.000  | 1.94                | 0.00 %                      | 48.67 %                     | 0.00 %                       | 51.33 %                     |            |
| 10.000 | 1.94                | 0.00 %                      | 48.67 %                     | 0.00 %                       | 51.33 %                     |            |
| 11.000 | 1.94                | 0.00 %                      | 48.67 %                     | 0.00 %                       | 51.33 %                     |            |
| 12.000 | 1.94                | 0.00 %                      | 48.67 %                     | 0.00 %                       | 51.33 %                     |            |

## Carbonate and acidity

Carbonate 0.038 mM  
Acidity error 0.005 mM

## Other graphs

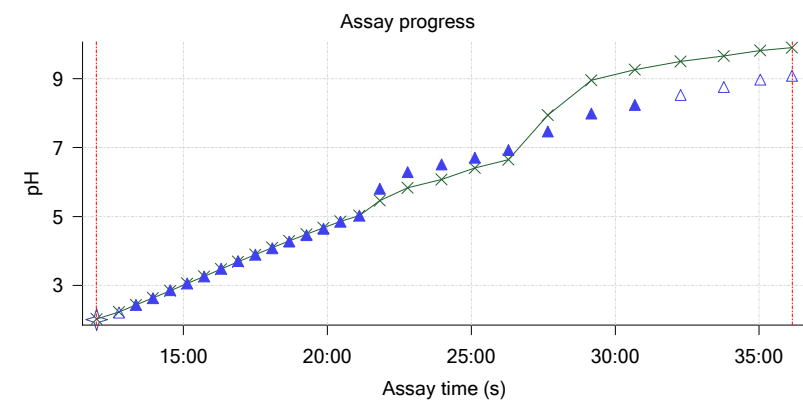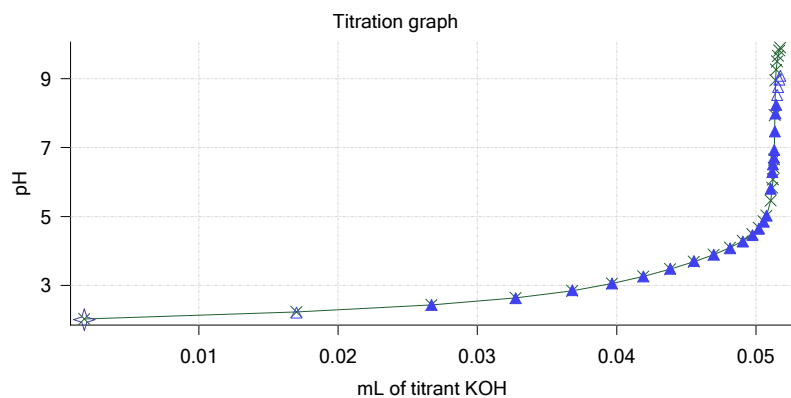

Sample name: **M11\_octanol**  
 Assay name: **pH-metric high logP**  
 Assay ID: **18C-01002**  
 Filename: **C:\Sirius\_T3\Mehtap\20180228\_exp28\_logP\_T3-2\18C-01002\_M11\_octanol\_pH-metric high logP.t3r**

Experiment start time: **3/1/2018 1:21:08 AM**  
 Analyst: **Pion**  
 Instrument ID: **T312060**

## Other graphs (continued)

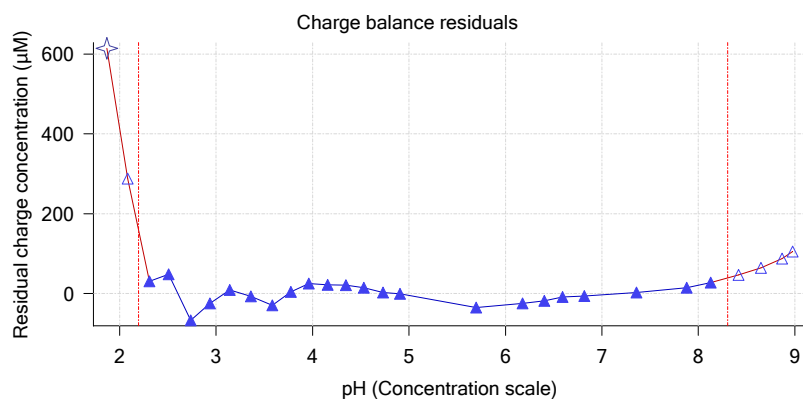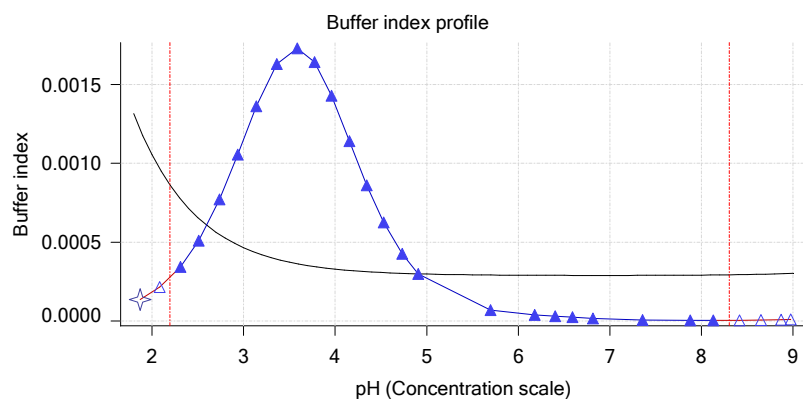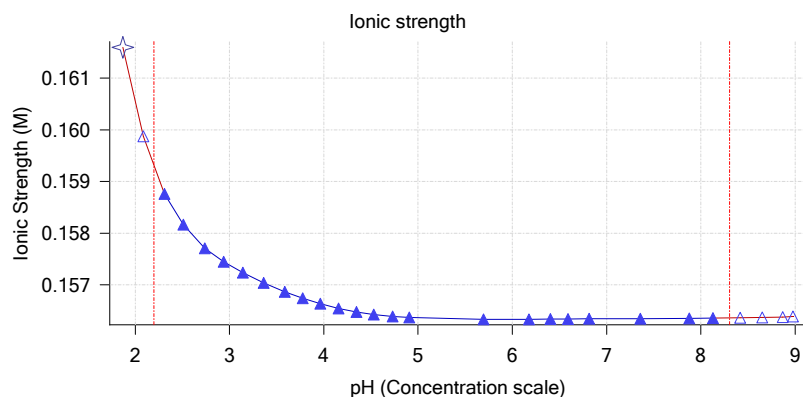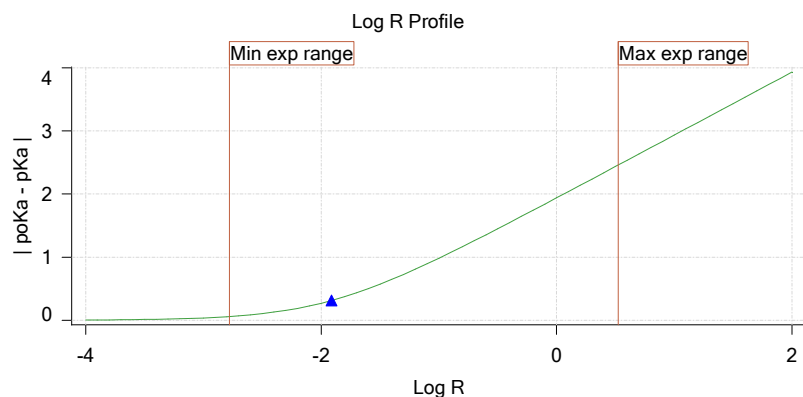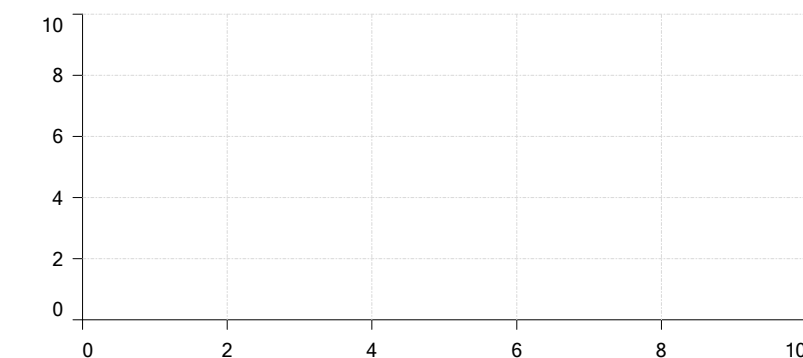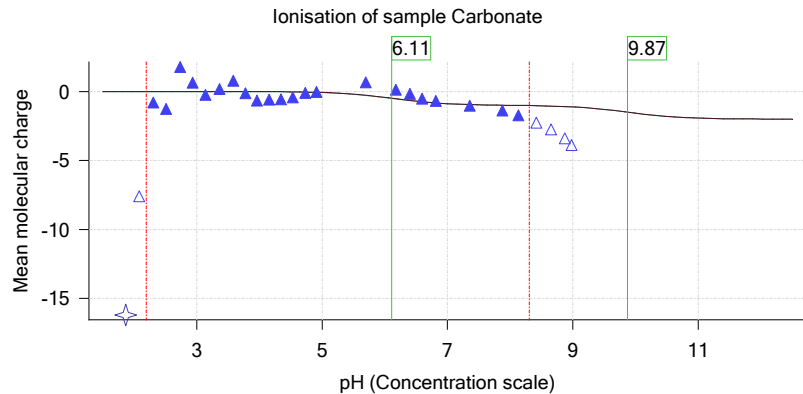

Sample name: **M11\_octanol**  
 Assay name: **pH-metric high logP**  
 Assay ID: **18C-01002**  
 Filename: **C:\Sirius\_T3\Mehtap\20180228\_exp28\_logP\_T3-2\18C-01002\_M11\_octanol\_pH-metric high logP.t3r**

Experiment start time: **3/1/2018 1:21:08 AM**  
 Analyst: **Pion**  
 Instrument ID: **T312060**

## pH-metric high logP Titration 2 of 3 18C-01002 Points 29 to 49

### Overall results

RMSD 0.536  
 Average ionic strength 0.163 M  
 Average temperature 25.0°C  
 Partition ratio 0.0407 : 1  
 Analyte concentration range 2865.3 µM to 2956.0 µM  
 Total points considered 17 of 21

### Warnings and errors

Errors None  
 Warnings One or more logP values out of range

### Four-Plus parameters

|                                                                                |       |        |                     |                           |
|--------------------------------------------------------------------------------|-------|--------|---------------------|---------------------------|
|  | Alpha | 0.130  | 3/1/2018 1:21:08 AM | C:\Sirius_T3\HCl18B27.t3r |
|  | S     | 0.9970 | 3/1/2018 1:21:08 AM | C:\Sirius_T3\HCl18B27.t3r |
|  | jH    | 0.8    | 3/1/2018 1:21:08 AM | C:\Sirius_T3\HCl18B27.t3r |
|  | jOH   | -0.4   | 3/1/2018 1:21:08 AM | C:\Sirius_T3\HCl18B27.t3r |

### Titrants

|                                                                                 |            |          |                     |                           |
|---------------------------------------------------------------------------------|------------|----------|---------------------|---------------------------|
|   | 0.50 M HCl | 0.993513 | 3/1/2018 1:21:08 AM | C:\Sirius_T3\HCl18B27.t3r |
|  | 0.50 M KOH | 0.999845 | 3/1/2018 1:21:08 AM | C:\Sirius_T3\KOH18B27.t3r |

### Sample

|                                                                                  |                                  |       |
|----------------------------------------------------------------------------------|----------------------------------|-------|
|  | M11_octanol concentration factor | 0.777 |
|  | Base pKa 1                       | 3.89  |
|  | logP (XH +)                      | -5.10 |
|  | logP (neutral X)                 | 2.08  |

### Sample graphs

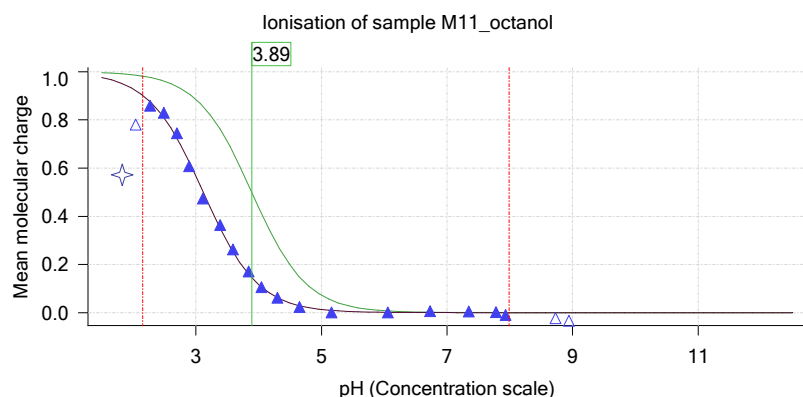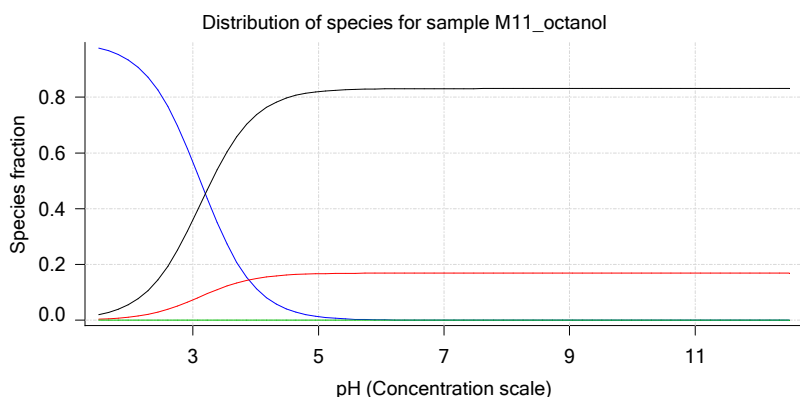

Sample name: **M11\_octanol**  
 Assay name: **pH-metric high logP**  
 Assay ID: **18C-01002**  
 Filename: **C:\Sirius\_T3\Mehtap\20180228\_exp28\_logP\_T3-2\18C-01002\_M11\_octanol\_pH-metric high logP.t3r**

Experiment start time: **3/1/2018 1:21:08 AM**  
 Analyst: **Pion**  
 Instrument ID: **T312060**

## Sample graphs (continued)

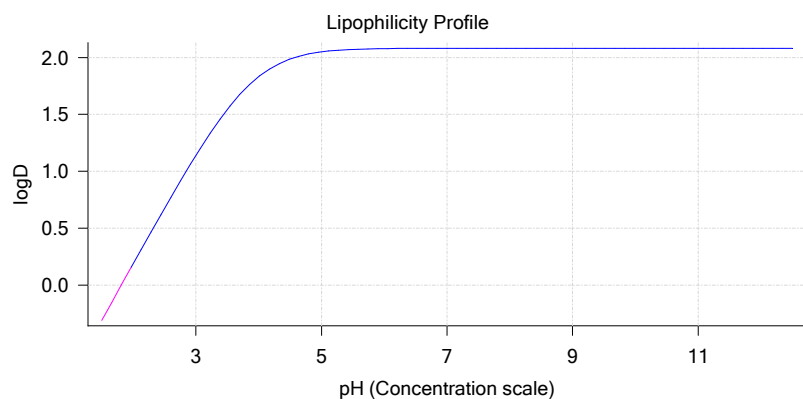

## Sample logD and percent species

| pH     | M11_octanol<br>logD | M11_octanol<br>M11_octanolH | M11_octanol<br>M11_octanolH | M11_octanol<br>M11_octanolH* | M11_octanol<br>M11_octanol* | Comment    |
|--------|---------------------|-----------------------------|-----------------------------|------------------------------|-----------------------------|------------|
| 1.000  | -0.81               | 99.24 %                     | 0.13 %                      | 0.00 %                       | 0.63 %                      |            |
| 1.200  | -0.61               | 98.81 %                     | 0.20 %                      | 0.00 %                       | 0.99 %                      | Stomach pH |
| 2.000  | 0.19                | 92.92 %                     | 1.20 %                      | 0.00 %                       | 5.88 %                      |            |
| 3.000  | 1.14                | 56.77 %                     | 7.31 %                      | 0.00 %                       | 35.91 %                     |            |
| 4.000  | 1.83                | 11.61 %                     | 14.96 %                     | 0.00 %                       | 73.44 %                     |            |
| 5.000  | 2.05                | 1.30 %                      | 16.70 %                     | 0.00 %                       | 82.00 %                     |            |
| 6.000  | 2.08                | 0.13 %                      | 16.90 %                     | 0.00 %                       | 82.97 %                     |            |
| 6.500  | 2.08                | 0.04 %                      | 16.91 %                     | 0.00 %                       | 83.05 %                     |            |
| 7.000  | 2.08                | 0.01 %                      | 16.92 %                     | 0.00 %                       | 83.07 %                     |            |
| 7.400  | 2.08                | 0.01 %                      | 16.92 %                     | 0.00 %                       | 83.08 %                     | Blood pH   |
| 8.000  | 2.08                | 0.00 %                      | 16.92 %                     | 0.00 %                       | 83.08 %                     |            |
| 9.000  | 2.08                | 0.00 %                      | 16.92 %                     | 0.00 %                       | 83.08 %                     |            |
| 10.000 | 2.08                | 0.00 %                      | 16.92 %                     | 0.00 %                       | 83.08 %                     |            |
| 11.000 | 2.08                | 0.00 %                      | 16.92 %                     | 0.00 %                       | 83.08 %                     |            |
| 12.000 | 2.08                | 0.00 %                      | 16.92 %                     | 0.00 %                       | 83.08 %                     |            |

## Carbonate and acidity

Carbonate 0.115 mM  
 Acidity error -0.467 mM

## Other graphs

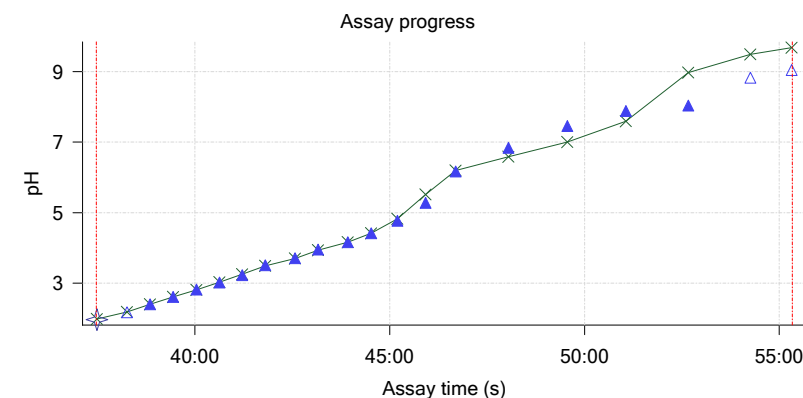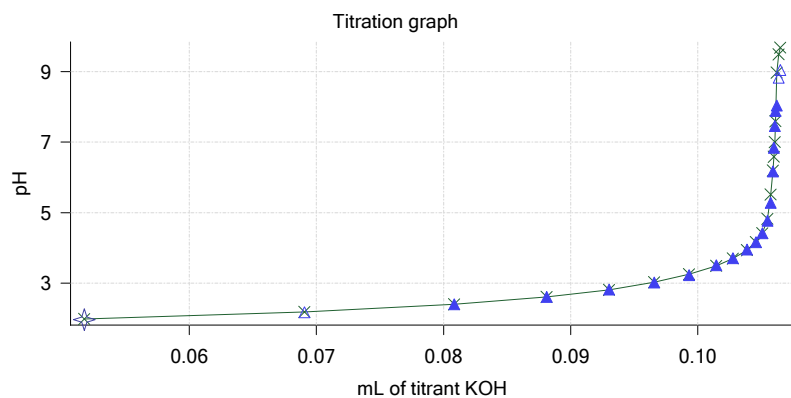



Sample name: **M11\_octanol**  
 Assay name: **pH-metric high logP**  
 Assay ID: **18C-01002**  
 Filename: **C:\Sirius\_T3\Mehtap\20180228\_exp28\_logP\_T3-2\18C-01002\_M11\_octanol\_pH-metric high logP.t3r**

Experiment start time: **3/1/2018 1:21:08 AM**  
 Analyst: **Pion**  
 Instrument ID: **T312060**

## Other graphs (continued)

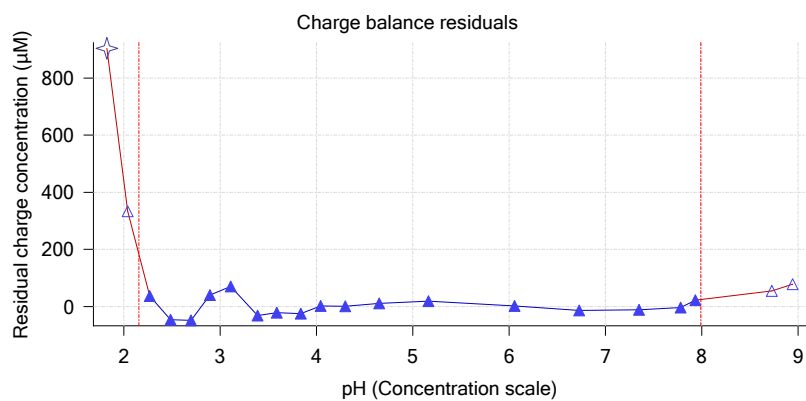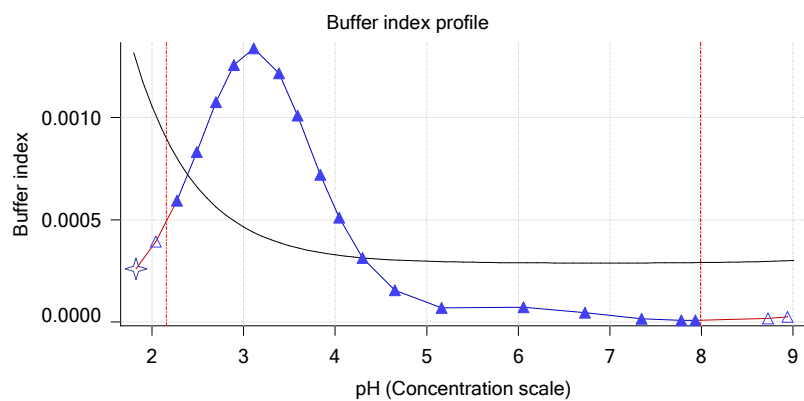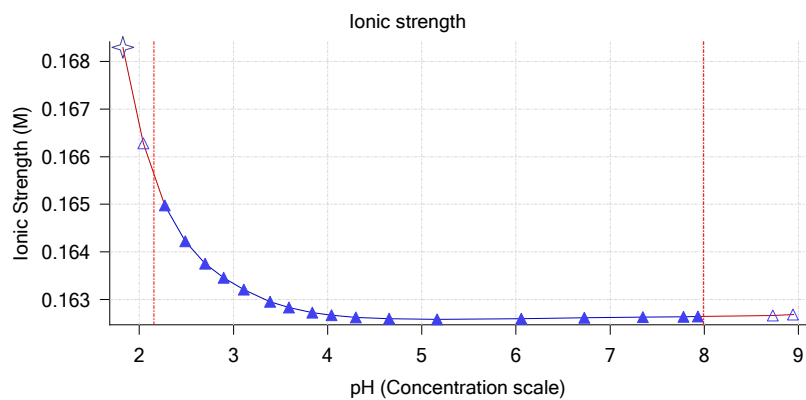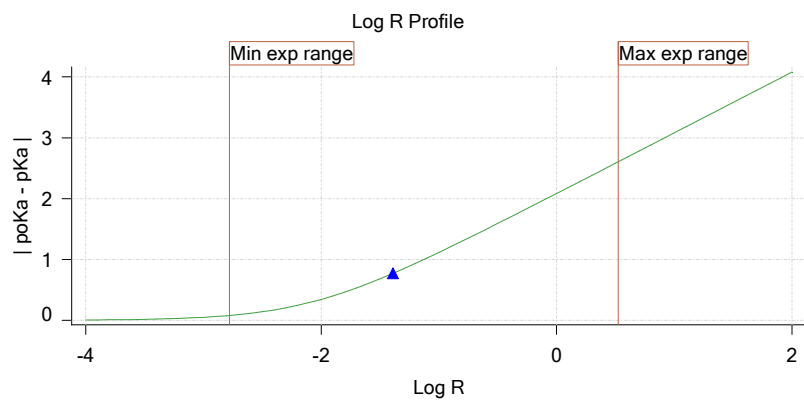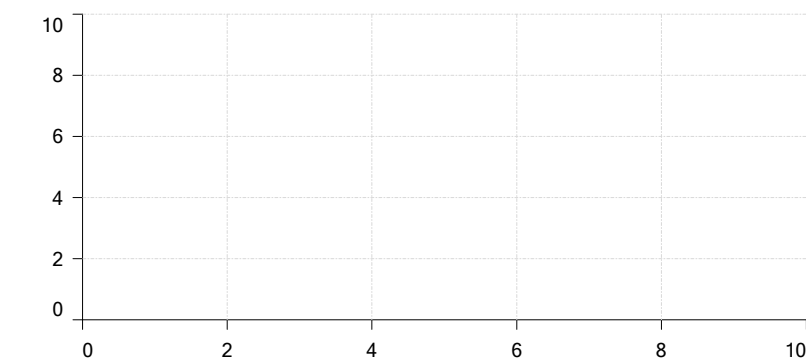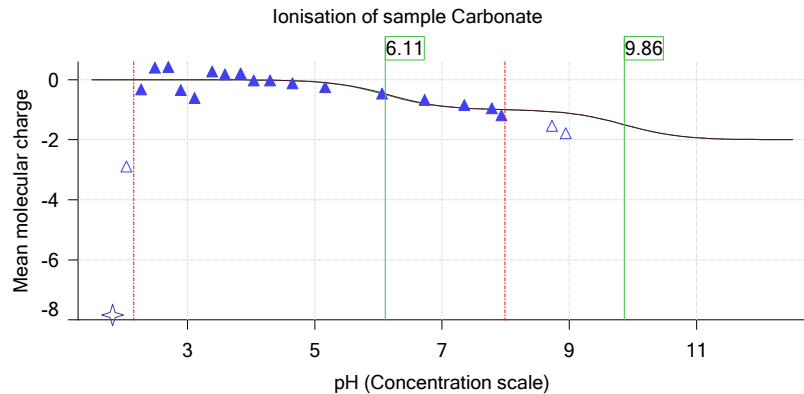

Sample name: **M11\_octanol**  
 Assay name: **pH-metric high logP**  
 Assay ID: **18C-01002**  
 Filename: **C:\Sirius\_T3\Mehtap\20180228\_exp28\_logP\_T3-2\18C-01002\_M11\_octanol\_pH-metric high logP.t3r**

Experiment start time: **3/1/2018 1:21:08 AM**  
 Analyst: **Pion**  
 Instrument ID: **T312060**

pH-metric high logP Titration 3 of 3 18C-01002 Points 50 to 75

## Overall results

RMSD 0.550  
 Average ionic strength 0.169 M  
 Average temperature 25.0°C  
 Partition ratio 0.1199 : 1  
 Analyte concentration range 2489.4 µM to 2561.6 µM  
 Total points considered 21 of 26

## Warnings and errors

Errors None  
 Warnings One or more logP values out of range  
 Excessive acidity error present

## Four-Plus parameters

 Alpha 0.130 3/1/2018 1:21:08 AM C:\Sirius\_T3\HCl18B27.t3r  
 S 0.9970 3/1/2018 1:21:08 AM C:\Sirius\_T3\HCl18B27.t3r  
 jH 0.8 3/1/2018 1:21:08 AM C:\Sirius\_T3\HCl18B27.t3r  
 jOH -0.4 3/1/2018 1:21:08 AM C:\Sirius\_T3\HCl18B27.t3r

## Titrants

 0.50 M HCl 0.993513 3/1/2018 1:21:08 AM C:\Sirius\_T3\HCl18B27.t3r  
 0.50 M KOH 0.999845 3/1/2018 1:21:08 AM C:\Sirius\_T3\KOH18B27.t3r

## Sample

 M11\_octanol concentration factor 0.713  
 Base pKa 1 3.89  
 logP (XH +) -5.10  
 logP (neutral X) 1.99

## Sample graphs

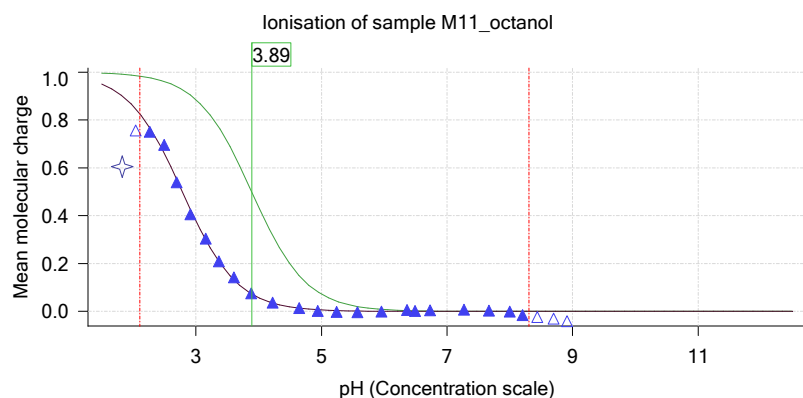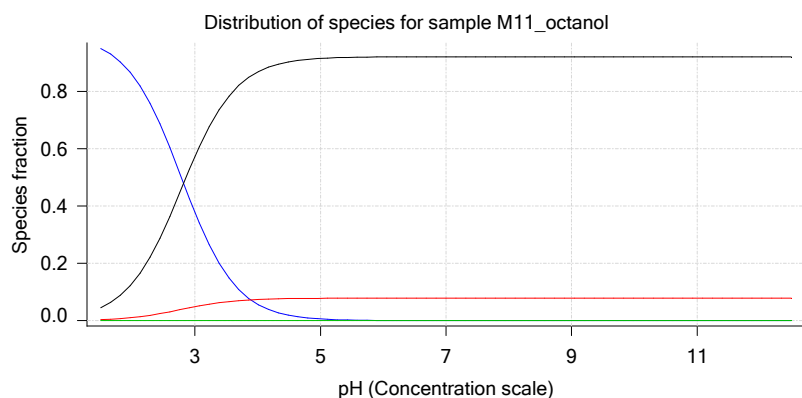

Sample name: **M11\_octanol**  
Assay name: **pH-metric high logP**  
Assay ID: **18C-01002**  
Filename: **C:\Sirius\_T3\Mehtap\20180228\_exp28\_logP\_T3-2\18C-01002\_M11\_octanol\_pH-metric high logP.t3r**

Experiment start time: **3/1/2018 1:21:08 AM**  
Analyst: **Pion**  
Instrument ID: **T312060**

## Sample graphs (continued)

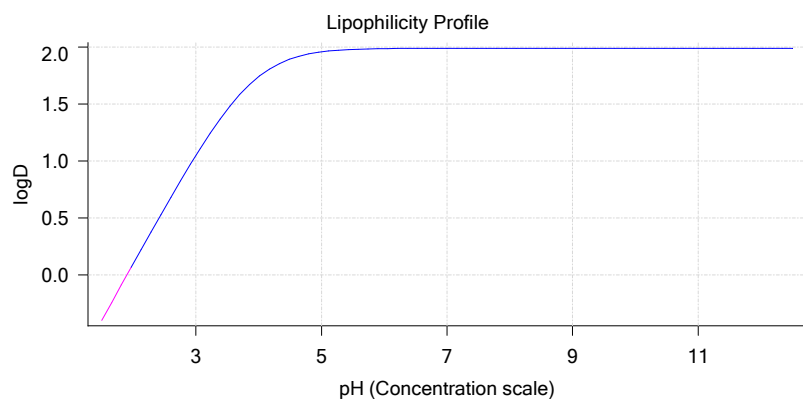

## Sample logD and percent species

| pH     | M11_octanol<br>logD | M11_octanol<br>M11_octanolH | M11_octanol<br>M11_octanol | M11_octanol<br>M11_octanolH* | M11_octanol<br>M11_octanol* | Comment    |
|--------|---------------------|-----------------------------|----------------------------|------------------------------|-----------------------------|------------|
| 1.000  | -0.90               | 98.39 %                     | 0.13 %                     | 0.00 %                       | 1.49 %                      | Stomach pH |
| 1.200  | -0.70               | 97.47 %                     | 0.20 %                     | 0.00 %                       | 2.33 %                      |            |
| 2.000  | 0.09                | 85.92 %                     | 1.11 %                     | 0.00 %                       | 12.97 %                     |            |
| 3.000  | 1.05                | 37.90 %                     | 4.88 %                     | 0.00 %                       | 57.21 %                     |            |
| 4.000  | 1.74                | 5.75 %                      | 7.41 %                     | 0.00 %                       | 86.84 %                     |            |
| 5.000  | 1.96                | 0.61 %                      | 7.82 %                     | 0.00 %                       | 91.58 %                     | Blood pH   |
| 6.000  | 1.99                | 0.06 %                      | 7.86 %                     | 0.00 %                       | 92.08 %                     |            |
| 6.500  | 1.99                | 0.02 %                      | 7.86 %                     | 0.00 %                       | 92.12 %                     |            |
| 7.000  | 1.99                | 0.01 %                      | 7.86 %                     | 0.00 %                       | 92.13 %                     |            |
| 7.400  | 1.99                | 0.00 %                      | 7.86 %                     | 0.00 %                       | 92.13 %                     |            |
| 8.000  | 1.99                | 0.00 %                      | 7.86 %                     | 0.00 %                       | 92.14 %                     |            |
| 9.000  | 1.99                | 0.00 %                      | 7.86 %                     | 0.00 %                       | 92.14 %                     |            |
| 10.000 | 1.99                | 0.00 %                      | 7.86 %                     | 0.00 %                       | 92.14 %                     |            |
| 11.000 | 1.99                | 0.00 %                      | 7.86 %                     | 0.00 %                       | 92.14 %                     |            |
| 12.000 | 1.99                | 0.00 %                      | 7.86 %                     | 0.00 %                       | 92.14 %                     |            |

## Carbonate and acidity

Carbonate 0.103 mM  
Acidity error -1.332 mM

## Other graphs

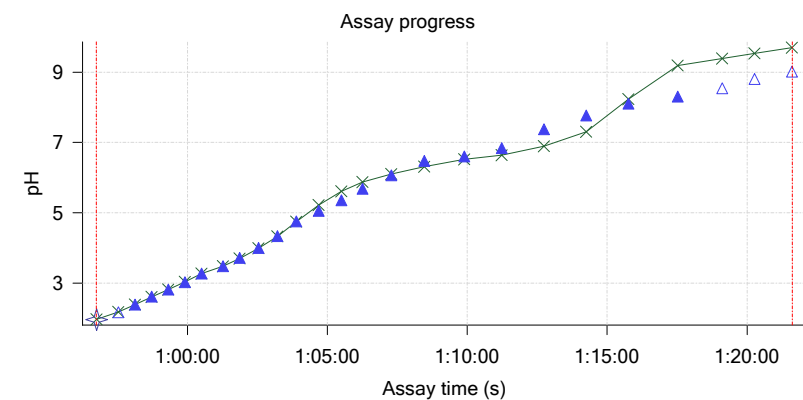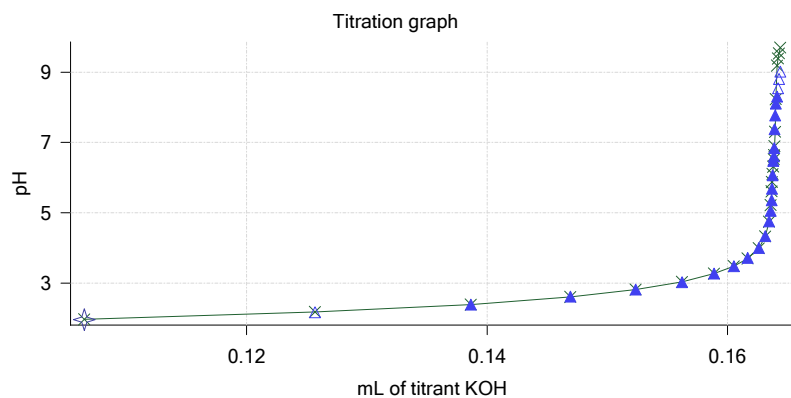

Sample name: **M11\_octanol**  
 Assay name: **pH-metric high logP**  
 Assay ID: **18C-01002**  
 Filename: **C:\Sirius\_T3\Mehtap\20180228\_exp28\_logP\_T3-2\18C-01002\_M11\_octanol\_pH-metric high logP.t3r**

Experiment start time: **3/1/2018 1:21:08 AM**  
 Analyst: **Pion**  
 Instrument ID: **T312060**

## Other graphs (continued)

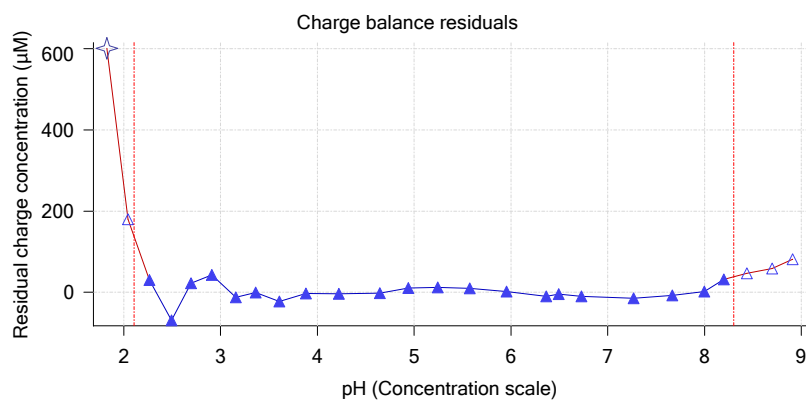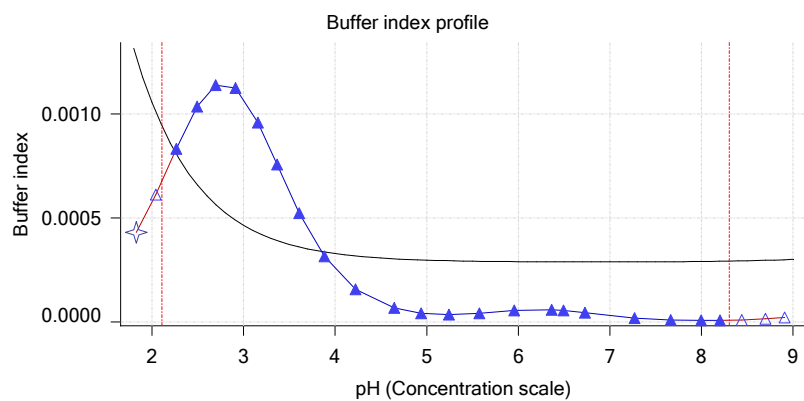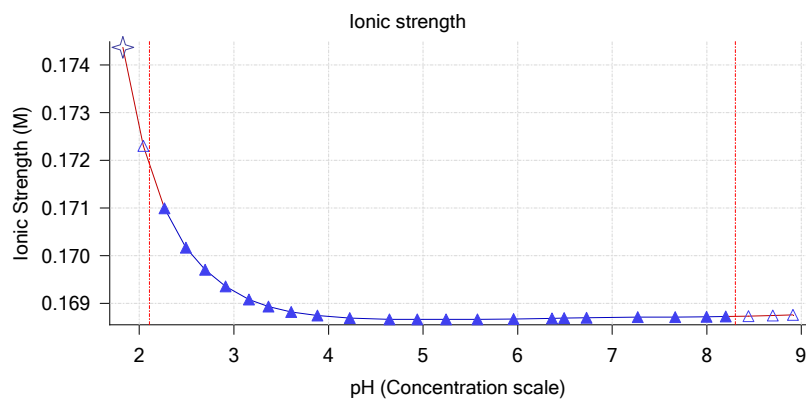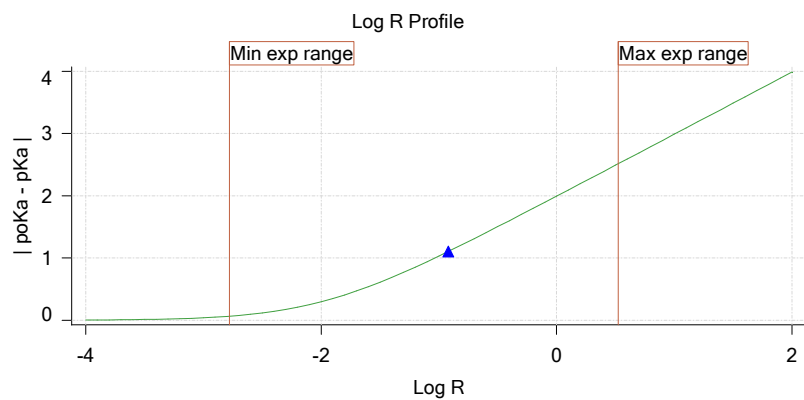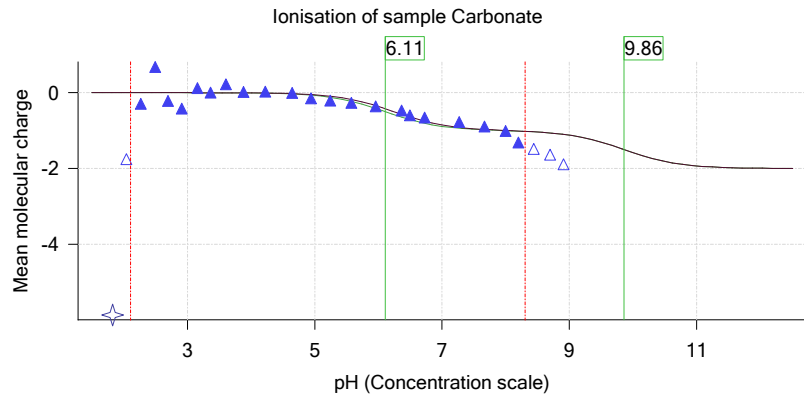

Sample name: **M11\_octanol**  
 Assay name: **pH-metric high logP**  
 Assay ID: **18C-01002**  
 Filename: **C:\Sirius\_T3\Mehtap\20180228\_exp28\_logP\_T3-2\18C-01002\_M11\_octanol\_pH-metric high logP.t3r**

Experiment start time: **3/1/2018 1:21:08 AM**  
 Analyst: **Pion**  
 Instrument ID: **T312060**

## Assay Model

| Settings                          | Value        | Date/Time changed    | Imported from      |
|-----------------------------------|--------------|----------------------|--------------------|
| Sample name                       | M11_octanol  | 2/27/2018 4:54:30 PM | User entered value |
| Sample by                         | Weight       |                      | Default value      |
| Sample weight                     | 0.001080 g   | 2/28/2018 4:24:59 PM | User entered value |
| Formula weight                    | 211.22 g/mol | 2/27/2018 4:54:30 PM | User entered value |
| Solubility                        | Unknown      |                      | Default value      |
| Molecular weight                  | 211.22       | 2/27/2018 4:54:30 PM | User entered value |
| Individual pKa ionic environments | No           |                      | Default value      |
| Number of pKas                    | 1            | 2/27/2018 4:54:30 PM | User entered value |
| Sample is a                       | Base         | 2/27/2018 4:54:30 PM | User entered value |
| pKa 1                             | 3.89         | 2/27/2018 4:54:30 PM | User entered value |
| logp (XH +)                       | -5.60        | 2/28/2018 1:53:21 PM | User entered value |
| logP (neutral X)                  | 2.09         | 2/28/2018 1:53:11 PM | User entered value |

## Events

| Time    | Event             | Water      | Acid       | Base       | Octanol    | pH    | dpH/dt   | pH R-squared | pH SD   | dpH/dt time         |
|---------|-------------------|------------|------------|------------|------------|-------|----------|--------------|---------|---------------------|
| 8:59.7  | Initial pH = 8.06 |            |            |            |            |       |          |              |         |                     |
| 11:59.3 | Data point 1      | 1.50000 mL | 0.05153 mL | 0.00179 mL | 0.01999 mL | 2.005 | -0.00768 | 0.87550      | 0.00040 | 10.0 s              |
| 12:45.4 | Data point 2      | 1.50000 mL | 0.05153 mL | 0.01700 mL | 0.01999 mL | 2.215 | -0.00104 | 0.14554      | 0.00013 | 10.0 s              |
| 13:21.1 | Data point 3      | 1.50000 mL | 0.05153 mL | 0.02672 mL | 0.01999 mL | 2.436 | -0.00042 | 0.01137      | 0.00020 | 10.0 s              |
| 13:56.6 | Data point 4      | 1.50000 mL | 0.05153 mL | 0.03274 mL | 0.01999 mL | 2.635 | -0.00726 | 0.18423      | 0.00084 | 10.0 s              |
| 14:32.2 | Data point 5      | 1.50000 mL | 0.05153 mL | 0.03681 mL | 0.01999 mL | 2.861 | -0.00222 | 0.27923      | 0.00021 | 10.0 s              |
| 15:07.7 | Data point 6      | 1.50000 mL | 0.05153 mL | 0.03965 mL | 0.01999 mL | 3.060 | -0.00837 | 0.77297      | 0.00047 | 10.0 s              |
| 15:43.1 | Data point 7      | 1.50000 mL | 0.05153 mL | 0.04191 mL | 0.01999 mL | 3.262 | -0.00454 | 0.61543      | 0.00029 | 10.0 s              |
| 16:18.6 | Data point 8      | 1.50000 mL | 0.05153 mL | 0.04384 mL | 0.01999 mL | 3.482 | -0.00445 | 0.55554      | 0.00029 | 10.0 s              |
| 16:54.1 | Data point 9      | 1.50000 mL | 0.05153 mL | 0.04553 mL | 0.01999 mL | 3.705 | -0.01127 | 0.51278      | 0.00078 | 10.0 s              |
| 17:29.6 | Data point 10     | 1.50000 mL | 0.05153 mL | 0.04697 mL | 0.01999 mL | 3.894 | -0.00094 | 0.05467      | 0.00020 | 10.5 s              |
| 18:05.4 | Data point 11     | 1.50000 mL | 0.05153 mL | 0.04814 mL | 0.01999 mL | 4.080 | -0.00544 | 0.86041      | 0.00029 | 10.0 s              |
| 18:40.8 | Data point 12     | 1.50000 mL | 0.05153 mL | 0.04906 mL | 0.01999 mL | 4.274 | -0.01020 | 0.91768      | 0.00053 | 10.5 s              |
| 19:16.8 | Data point 13     | 1.50000 mL | 0.05153 mL | 0.04974 mL | 0.01999 mL | 4.463 | -0.01138 | 0.78057      | 0.00064 | 10.0 s              |
| 19:52.2 | Data point 14     | 1.50000 mL | 0.05153 mL | 0.05021 mL | 0.01999 mL | 4.648 | -0.01383 | 0.82707      | 0.00075 | 10.0 s              |
| 20:27.6 | Data point 15     | 1.50000 mL | 0.05153 mL | 0.05054 mL | 0.01999 mL | 4.848 | -0.01852 | 0.92972      | 0.00095 | 13.5 s              |
| 21:06.5 | Data point 16     | 1.50000 mL | 0.05153 mL | 0.05075 mL | 0.01999 mL | 5.023 | -0.01863 | 0.95790      | 0.00094 | 12.0 s              |
| 21:49.0 | Data point 17     | 1.50000 mL | 0.05153 mL | 0.05106 mL | 0.01999 mL | 5.808 | -0.01925 | 0.92072      | 0.00099 | 22.5 s              |
| 22:47.2 | Data point 18     | 1.50000 mL | 0.05153 mL | 0.05118 mL | 0.01999 mL | 6.289 | -0.01833 | 0.92758      | 0.00094 | 40.0 s              |
| 23:57.7 | Data point 19     | 1.50000 mL | 0.05153 mL | 0.05122 mL | 0.01999 mL | 6.513 | -0.01738 | 0.88907      | 0.00091 | 44.5 s              |
| 25:07.7 | Data point 20     | 1.50000 mL | 0.05153 mL | 0.05127 mL | 0.01999 mL | 6.702 | -0.01872 | 0.87409      | 0.00099 | 44.5 s              |
| 26:17.6 | Data point 21     | 1.50000 mL | 0.05153 mL | 0.05129 mL | 0.01999 mL | 6.926 | -0.01864 | 0.99231      | 0.00092 | 51.5 s              |
| 27:39.8 | Data point 22     | 1.50000 mL | 0.05153 mL | 0.05134 mL | 0.01999 mL | 7.465 | -0.05629 | 0.99724      | 0.00278 | Timed out at 59.5 s |
| 29:10.2 | Data point 23     | 1.50000 mL | 0.05153 mL | 0.05139 mL | 0.01999 mL | 7.984 | -0.04354 | 0.97478      | 0.00218 | Timed out at 59.5 s |
| 30:40.7 | Data point 24     | 1.50000 mL | 0.05153 mL | 0.05143 mL | 0.01999 mL | 8.234 | -0.03056 | 0.98451      | 0.00152 | Timed out at 59.5 s |
| 32:16.3 | Data point 25     | 1.50000 mL | 0.05153 mL | 0.05151 mL | 0.01999 mL | 8.520 | -0.01890 | 0.92260      | 0.00097 | 54.5 s              |
| 33:46.5 | Data point 26     | 1.50000 mL | 0.05153 mL | 0.05158 mL | 0.01999 mL | 8.753 | -0.01846 | 0.87251      | 0.00098 | 40.5 s              |
| 35:02.6 | Data point 27     | 1.50000 mL | 0.05153 mL | 0.05167 mL | 0.01999 mL | 8.972 | -0.01838 | 0.89623      | 0.00096 | 35.0 s              |
| 36:08.2 | Data point 28     | 1.50000 mL | 0.05153 mL | 0.05174 mL | 0.01999 mL | 9.079 | -0.01907 | 0.95761      | 0.00096 | 21.5 s              |
| 37:29.0 | Data point 29     | 1.50000 mL | 0.10802 mL | 0.05174 mL | 0.06999 mL | 1.962 | -0.01000 | 0.87704      | 0.00053 | 10.0 s              |
| 38:15.3 | Data point 30     | 1.50000 mL | 0.10802 mL | 0.06905 mL | 0.06999 mL | 2.172 | -0.01070 | 0.38504      | 0.00085 | 10.0 s              |
| 38:51.0 | Data point 31     | 1.50000 mL | 0.10802 mL | 0.08083 mL | 0.06999 mL | 2.398 | 0.00033  | 0.00320      | 0.00029 | 10.0 s              |
| 39:26.6 | Data point 32     | 1.50000 mL | 0.10802 mL | 0.08812 mL | 0.06999 mL | 2.613 | -0.00001 | 0.00001      | 0.00013 | 10.0 s              |
| 40:02.1 | Data point 33     | 1.50000 mL | 0.10802 mL | 0.09302 mL | 0.06999 mL | 2.822 | -0.00176 | 0.22522      | 0.00018 | 10.0 s              |
| 40:37.6 | Data point 34     | 1.50000 mL | 0.10802 mL | 0.09657 mL | 0.06999 mL | 3.017 | -0.00360 | 0.20627      | 0.00039 | 10.0 s              |
| 41:13.0 | Data point 35     | 1.50000 mL | 0.10802 mL | 0.09932 mL | 0.06999 mL | 3.231 | -0.00250 | 0.58779      | 0.00016 | 10.0 s              |
| 41:48.5 | Data point 36     | 1.50000 mL | 0.10802 mL | 0.10146 mL | 0.06999 mL | 3.509 | -0.00677 | 0.28436      | 0.00063 | 10.0 s              |
| 42:34.2 | Data point 37     | 1.50000 mL | 0.10802 mL | 0.10278 mL | 0.06999 mL | 3.709 | -0.00300 | 0.43965      | 0.00022 | 10.0 s              |

Sample name: **M11\_octanol**  
 Assay name: **pH-metric high logP**  
 Assay ID: **18C-01002**  
 Filename: **C:\Sirius\_T3\Mehtap\20180228\_exp28\_logP\_T3-2\18C-01002\_M11\_octanol\_pH-metric high logP.t3r**

Experiment start time: **3/1/2018 1:21:08 AM**  
 Analyst: **Pion**  
 Instrument ID: **T312060**

## Events (continued)

| Time      | Event         | Water      | Acid       | Base       | Octanol    | pH    | dpH/dt   | pH R-squared | pH SD   | dpH/dt time         |
|-----------|---------------|------------|------------|------------|------------|-------|----------|--------------|---------|---------------------|
| 43:09.6   | Data point 38 | 1.50000 mL | 0.10802 mL | 0.10388 mL | 0.06999 mL | 3.957 | -0.00406 | 0.29082      | 0.00037 | 10.0 s              |
| 43:55.3   | Data point 39 | 1.50000 mL | 0.10802 mL | 0.10459 mL | 0.06999 mL | 4.161 | -0.00477 | 0.72196      | 0.00028 | 10.5 s              |
| 44:31.3   | Data point 40 | 1.50000 mL | 0.10802 mL | 0.10508 mL | 0.06999 mL | 4.417 | -0.01592 | 0.90741      | 0.00083 | 10.0 s              |
| 45:11.8   | Data point 41 | 1.50000 mL | 0.10802 mL | 0.10548 mL | 0.06999 mL | 4.769 | -0.01738 | 0.82458      | 0.00095 | 13.0 s              |
| 45:55.4   | Data point 42 | 1.50000 mL | 0.10802 mL | 0.10574 mL | 0.06999 mL | 5.276 | -0.01305 | 0.55308      | 0.00087 | 15.5 s              |
| 46:41.4   | Data point 43 | 1.50000 mL | 0.10802 mL | 0.10590 mL | 0.06999 mL | 6.170 | -0.01853 | 0.94972      | 0.00094 | 46.0 s              |
| 48:03.1   | Data point 44 | 1.50000 mL | 0.10802 mL | 0.10600 mL | 0.06999 mL | 6.837 | -0.04872 | 0.98691      | 0.00242 | Timed out at 59.5 s |
| 49:33.5   | Data point 45 | 1.50000 mL | 0.10802 mL | 0.10607 mL | 0.06999 mL | 7.455 | -0.05872 | 0.98494      | 0.00292 | Timed out at 59.5 s |
| 51:04.0   | Data point 46 | 1.50000 mL | 0.10802 mL | 0.10612 mL | 0.06999 mL | 7.887 | -0.06009 | 0.99005      | 0.00298 | Timed out at 59.5 s |
| 52:39.7   | Data point 47 | 1.50000 mL | 0.10802 mL | 0.10621 mL | 0.06999 mL | 8.038 | -0.04607 | 0.98857      | 0.00229 | Timed out at 59.5 s |
| 54:15.4   | Data point 48 | 1.50000 mL | 0.10802 mL | 0.10637 mL | 0.06999 mL | 8.831 | -0.01813 | 0.88499      | 0.00095 | 28.0 s              |
| 55:19.1   | Data point 49 | 1.50000 mL | 0.10802 mL | 0.10649 mL | 0.06999 mL | 9.044 | -0.01850 | 0.93380      | 0.00095 | 24.5 s              |
| 56:45.5   | Data point 50 | 1.50000 mL | 0.16959 mL | 0.10649 mL | 0.21999 mL | 1.963 | -0.00309 | 0.05617      | 0.00064 | 10.0 s              |
| 57:31.7   | Data point 51 | 1.50000 mL | 0.16959 mL | 0.12568 mL | 0.21999 mL | 2.174 | -0.01262 | 0.82319      | 0.00069 | 10.0 s              |
| 58:07.5   | Data point 52 | 1.50000 mL | 0.16959 mL | 0.13864 mL | 0.21999 mL | 2.394 | -0.00228 | 0.23781      | 0.00023 | 10.0 s              |
| 58:43.1   | Data point 53 | 1.50000 mL | 0.16959 mL | 0.14692 mL | 0.21999 mL | 2.618 | 0.00798  | 0.26467      | 0.00077 | 10.0 s              |
| 59:18.7   | Data point 54 | 1.50000 mL | 0.16959 mL | 0.15235 mL | 0.21999 mL | 2.818 | -0.00238 | 0.60816      | 0.00015 | 10.5 s              |
| 59:54.8   | Data point 55 | 1.50000 mL | 0.16959 mL | 0.15621 mL | 0.21999 mL | 3.034 | -0.00228 | 0.56070      | 0.00015 | 10.0 s              |
| 1:00:30.3 | Data point 56 | 1.50000 mL | 0.16959 mL | 0.15889 mL | 0.21999 mL | 3.279 | 0.00108  | 0.00354      | 0.00090 | 10.0 s              |
| 1:01:16.1 | Data point 57 | 1.50000 mL | 0.16959 mL | 0.16054 mL | 0.21999 mL | 3.485 | -0.00480 | 0.78494      | 0.00027 | 10.0 s              |
| 1:01:51.6 | Data point 58 | 1.50000 mL | 0.16959 mL | 0.16169 mL | 0.21999 mL | 3.726 | -0.00042 | 0.00046      | 0.00096 | 10.0 s              |
| 1:02:32.2 | Data point 59 | 1.50000 mL | 0.16959 mL | 0.16261 mL | 0.21999 mL | 4.002 | 0.00063  | 0.00106      | 0.00095 | 10.0 s              |
| 1:03:12.8 | Data point 60 | 1.50000 mL | 0.16959 mL | 0.16315 mL | 0.21999 mL | 4.342 | 0.00232  | 0.02472      | 0.00073 | 10.0 s              |
| 1:03:53.3 | Data point 61 | 1.50000 mL | 0.16959 mL | 0.16345 mL | 0.21999 mL | 4.762 | 0.00143  | 0.00712      | 0.00084 | 12.0 s              |
| 1:04:41.0 | Data point 62 | 1.50000 mL | 0.16959 mL | 0.16359 mL | 0.21999 mL | 5.055 | 0.00471  | 0.07278      | 0.00086 | 13.5 s              |
| 1:05:30.2 | Data point 63 | 1.50000 mL | 0.16959 mL | 0.16366 mL | 0.21999 mL | 5.358 | -0.00404 | 0.04516      | 0.00094 | 14.5 s              |
| 1:06:15.2 | Data point 64 | 1.50000 mL | 0.16959 mL | 0.16371 mL | 0.21999 mL | 5.687 | -0.01776 | 0.89415      | 0.00093 | 36.5 s              |
| 1:07:17.1 | Data point 65 | 1.50000 mL | 0.16959 mL | 0.16376 mL | 0.21999 mL | 6.068 | -0.01777 | 0.97728      | 0.00089 | 40.5 s              |
| 1:08:28.0 | Data point 66 | 1.50000 mL | 0.16959 mL | 0.16381 mL | 0.21999 mL | 6.474 | -0.02868 | 0.97106      | 0.00144 | Timed out at 59.5 s |
| 1:09:53.3 | Data point 67 | 1.50000 mL | 0.16959 mL | 0.16385 mL | 0.21999 mL | 6.603 | -0.01652 | 0.86246      | 0.00088 | 55.0 s              |
| 1:11:13.8 | Data point 68 | 1.50000 mL | 0.16959 mL | 0.16388 mL | 0.21999 mL | 6.837 | -0.03943 | 0.95981      | 0.00199 | Timed out at 59.5 s |
| 1:12:44.3 | Data point 69 | 1.50000 mL | 0.16959 mL | 0.16392 mL | 0.21999 mL | 7.376 | -0.07353 | 0.99451      | 0.00364 | Timed out at 59.5 s |
| 1:14:14.8 | Data point 70 | 1.50000 mL | 0.16959 mL | 0.16397 mL | 0.21999 mL | 7.773 | -0.06843 | 0.99215      | 0.00339 | Timed out at 59.5 s |
| 1:15:45.3 | Data point 71 | 1.50000 mL | 0.16959 mL | 0.16402 mL | 0.21999 mL | 8.104 | -0.04184 | 0.98451      | 0.00208 | Timed out at 59.5 s |
| 1:17:31.3 | Data point 72 | 1.50000 mL | 0.16959 mL | 0.16414 mL | 0.21999 mL | 8.306 | -0.03456 | 0.94740      | 0.00175 | Timed out at 59.5 s |
| 1:19:06.9 | Data point 73 | 1.50000 mL | 0.16959 mL | 0.16420 mL | 0.21999 mL | 8.544 | -0.01489 | 0.84815      | 0.00080 | 33.5 s              |
| 1:20:16.2 | Data point 74 | 1.50000 mL | 0.16959 mL | 0.16428 mL | 0.21999 mL | 8.801 | -0.01803 | 0.81436      | 0.00099 | 44.0 s              |
| 1:21:36.0 | Data point 75 | 1.50000 mL | 0.16959 mL | 0.16439 mL | 0.21999 mL | 9.012 | -0.01523 | 0.58113      | 0.00099 | 13.0 s              |
| 1:21:58.0 | Assay volumes | 1.50000 mL | 0.16959 mL | 0.16439 mL | 0.21999 mL |       |          |              |         |                     |

Sample name: **M11\_octanol**  
 Assay name: **pH-metric high logP**  
 Assay ID: **18C-01002**  
 Filename: **C:\Sirius\_T3\Mehtap\20180228\_exp28\_logP\_T3-2\18C-01002\_M11\_octanol\_pH-metric high logP.t3r**

Experiment start time: **3/1/2018 1:21:08 AM**  
 Analyst: **Pion**  
 Instrument ID: **T312060**

## Assay Settings

| Setting                             | Value              | Original Value | Date/Time changed | Imported from |
|-------------------------------------|--------------------|----------------|-------------------|---------------|
| <b>General Settings</b>             |                    |                |                   |               |
| Analyst name                        | Pion               |                |                   |               |
| <b>Standard Experiment Settings</b> |                    |                |                   |               |
| Number of titrations                | 3                  |                |                   |               |
| Minimum pH                          | 2.000              |                |                   |               |
| Maximum pH                          | 9.000              |                |                   |               |
| pH step between points of           | 0.200              |                |                   |               |
| Minimum titrant addition            | 0.00002 mL         |                |                   |               |
| Maximum titrant addition            | 0.10000 mL         |                |                   |               |
| Argon flow rate                     | 100%               |                |                   |               |
| Start titration using               | Cautious pH adjust |                |                   |               |
| <b>Advanced General Settings</b>    |                    |                |                   |               |
| Detect turbidity using              | None               |                |                   |               |
| Collect turbidity sensor data       | No                 |                |                   |               |
| Collect UV spectra                  | No                 |                |                   |               |
| Stir after titrant addition for     | 5 seconds          |                |                   |               |
| For titrant addition, stir at       | 10%                |                |                   |               |
| <b>Titration Pre-Dose</b>           |                    |                |                   |               |
| Titration pre-dose                  | None               |                |                   |               |
| <b>Assay Medium</b>                 |                    |                |                   |               |
| ISA water volume                    | 1.50 mL            |                |                   |               |
| Water added                         | Automatic          |                |                   |               |
| Partition solvent type              | Octanol            |                |                   |               |
| Partition volume                    | 0.020 mL           |                |                   |               |
| Partition solvent added             | Automatic          |                |                   |               |
| After partition addition, stir for  | 1 seconds          |                |                   |               |
| <b>Sample Sonication</b>            |                    |                |                   |               |
| Sonicate                            | Yes                |                |                   |               |
| Adjust pH for sonication            | No                 |                |                   |               |
| Sonicate for                        | 300 seconds        |                |                   |               |
| After sonication stir for           | 5 seconds          |                |                   |               |
| <b>Sample Dissolution</b>           |                    |                |                   |               |
| Perform a dissolution stage         | Yes                |                |                   |               |
| Adjust and hold pH for dissolution  | To start pH        |                |                   |               |
| Stir to dissolve for                | 120 seconds        |                |                   |               |
| For dissolution, stir at            | 10%                |                |                   |               |
| <b>Carbonate purge</b>              |                    |                |                   |               |
| Perform a carbonate purge           | No                 |                |                   |               |
| <b>Temperature Control</b>          |                    |                |                   |               |
| Wait for temperature                | Yes                |                |                   |               |
| Required start temperature          | 25.0°C             |                |                   |               |
| Acceptable deviation                | 0.5°C              |                |                   |               |
| Time to wait                        | 60 seconds         |                |                   |               |
| Stir speed of                       | 50%                |                |                   |               |
| <b>Titration 1</b>                  |                    |                |                   |               |
| Titrate from                        | Low to high pH     |                |                   |               |
| Adjust to start pH                  | Yes                |                |                   |               |
| After pH adjust stir for            | 30 seconds         |                |                   |               |
| Stir to allow partitioning for      | 15 seconds         |                |                   |               |
| Stirrer speed for partitioning      | 50%                |                |                   |               |
| <b>Titration 2</b>                  |                    |                |                   |               |
| Titrate from                        | Low to high pH     |                |                   |               |
| Add additional water                | 0.00 mL            |                |                   |               |
| Additional partition solvent volume | 0.050 mL           |                |                   |               |
| Additional partition solvent added  | Automatic          |                |                   |               |
| After pH adjust stir for            | 30 seconds         |                |                   |               |
| Stir to allow partitioning for      | 15 seconds         |                |                   |               |
| Stirrer speed for partitioning      | 55%                |                |                   |               |



Sample name: **M11\_octanol**  
Assay name: **pH-metric high logP**  
Assay ID: **18C-01002**  
Filename: **C:\Sirius\_T3\Mehtap\20180228\_exp28\_logP\_T3-2\18C-01002\_M11\_octanol\_pH-metric high logP.t3r**

Experiment start time: **3/1/2018 1:21:08 AM**  
Analyst: **Pion**  
Instrument ID: **T312060**

## Assay Settings (continued)

| Setting                             | Value          | Original Value | Date/Time changed | Imported from |
|-------------------------------------|----------------|----------------|-------------------|---------------|
| <b>Titration 3</b>                  |                |                |                   |               |
| Titrate from                        | Low to high pH |                |                   |               |
| Add additional water                | 0.00 mL        |                |                   |               |
| Additional partition solvent volume | 0.150 mL       |                |                   |               |
| Additional partition solvent added  | Automatic      |                |                   |               |
| After pH adjust stir for            | 30 seconds     |                |                   |               |
| Stir to allow partitioning for      | 15 seconds     |                |                   |               |
| Stirrer speed for partitioning      | 60%            |                |                   |               |
| <b>Data Point Stability</b>         |                |                |                   |               |
| Stir during data point collection   | No             |                |                   |               |
| Delay before data point collection  | 0 seconds      |                |                   |               |
| Number of points to average         | 20 points      |                |                   |               |
| Time interval between points        | 0.50 seconds   |                |                   |               |
| Required maximum standard deviation | 0.00100 dpH/dt |                |                   |               |
| Stability timeout after             | 60 seconds     |                |                   |               |

## Calibration Settings

| Setting                   | Value  | Date/Time changed   | Imported from             |
|---------------------------|--------|---------------------|---------------------------|
| Four-Plus alpha           | 0.130  | 3/1/2018 1:21:08 AM | C:\Sirius_T3\HCl18B27.t3r |
| Four-Plus S               | 0.9970 | 3/1/2018 1:21:08 AM | C:\Sirius_T3\HCl18B27.t3r |
| Four-Plus jH              | 0.8    | 3/1/2018 1:21:08 AM | C:\Sirius_T3\HCl18B27.t3r |
| Four-Plus jOH             | -0.4   | 3/1/2018 1:21:08 AM | C:\Sirius_T3\HCl18B27.t3r |
| Base concentration factor | 1.000  | 3/1/2018 1:21:08 AM | C:\Sirius_T3\KOH18B27.t3r |
| Acid concentration factor | 0.994  | 3/1/2018 1:21:08 AM | C:\Sirius_T3\HCl18B27.t3r |

## Instrument Settings

| Setting              | Value                      | Batch Id    | Install date           |
|----------------------|----------------------------|-------------|------------------------|
| Instrument owner     | Merck                      |             |                        |
| Instrument ID        | T312060                    |             |                        |
| Instrument type      | T3 Simulator               |             |                        |
| Software version     | 1.1.3.0                    |             |                        |
| Dispenser module     |                            | T3DM1200361 | 3/31/2009 5:24:52 AM   |
| Dispenser 0          | Water                      |             | 3/31/2009 5:25:05 AM   |
| Syringe volume       | 2.5 mL                     |             |                        |
| Firmware version     | 1.2.1(r2)                  |             |                        |
| Titrant              | Water (0.15 M KCl)         | 02-06-2018  | 2/27/2018 10:05:59 AM  |
| Dispenser 2          | Acid                       |             | 3/31/2009 5:25:11 AM   |
| Syringe volume       | 0.5 mL                     |             |                        |
| Firmware version     | 1.2.1(r2)                  |             |                        |
| Titrant              | Acid (0.5 M HCl)           | 02-27-2018  | 2/27/2018 10:27:22 AM  |
| Dispenser 1          | Base                       |             | 3/31/2009 5:25:21 AM   |
| Syringe volume       | 0.5 mL                     |             |                        |
| Firmware version     | 1.2.1(r2)                  |             |                        |
| Titrant              | Base (0.5 M KOH)           | 9/22/2017   | 2/27/2018 10:21:22 AM  |
| Dispenser 5          | Cosolvent                  |             | 3/31/2009 5:26:24 AM   |
| Syringe volume       | 2.5 mL                     |             |                        |
| Firmware version     | 1.2.1(r2)                  |             |                        |
| Distribution valve 5 | Distribution Valve         |             | 3/31/2009 5:28:19 AM   |
| Firmware version     | 1.1.3                      |             |                        |
| Port A               | Methanol (80%, 0.15 M KCl) | 09-26-17    | 2/7/2018 9:42:01 AM    |
| Port B               | Cyclohexane                | 11-01-17    | 2/27/2018 10:37:57 AM  |
| Dispenser 3          | Buffer                     |             | 8/3/2010 5:05:16 AM    |
| Syringe volume       | 0.5 mL                     |             |                        |
| Firmware version     | 1.2.1(r2)                  |             |                        |
| Titrant              | Dodecane                   | 2018/01/31  | 2/28/2018 10:18:04 AM  |
| Dispenser 6          | Octanol                    |             | 10/22/2010 10:52:43 AM |



Sample name: **M11\_octanol** Experiment start time: **3/1/2018 1:21:08 AM**  
 Assay name: **pH-metric high logP** Analyst: **Pion**  
 Assay ID: **18C-01002** Instrument ID: **T312060**  
 Filename: **C:\Sirius\_T3\Mehtap\20180228\_exp28\_logP\_T3-2\18C-01002\_M11\_octanol\_pH-metric high logP.t3r**

## Instrument Settings (continued)

| Setting                                   | Value                      | Batch Id    | Install date           |
|-------------------------------------------|----------------------------|-------------|------------------------|
| Syringe volume                            | 0.5 mL                     |             |                        |
| Firmware version                          | 1.2.1(r2)                  |             |                        |
| Titration                                 | Octanol                    | 01-31-2018  | 2/27/2018 9:59:35 AM   |
| Titration                                 |                            | T3TM1200161 | 3/31/2009 5:24:17 AM   |
| Horizontal axis firmware version          | 1.17 AI1DI2DO2 Stepper 2   |             |                        |
| Vertical axis firmware version            | 1.17 AI1DI2DO2 Stepper 2   |             |                        |
| Chassis I/O firmware version              | 1.11 AI1DI0DO4 Norgren I/O |             |                        |
| Probe I/O firmware version                | 1.1.1                      |             |                        |
| Electrode                                 | T3 Electrode               | T3E0923     | 1/23/2018 2:01:00 PM   |
| E0 calibration                            | +3.07 mV                   |             | 3/1/2018 1:21:36 AM    |
| Filling solution                          | 3M KCl                     | KCL097      | 2/27/2018 9:49:43 AM   |
| Liquids                                   |                            |             |                        |
| Wash 1                                    | 50% IPA:50% Water          |             | 2/28/2018 10:23:32 AM  |
| Wash 2                                    | 0.5% Triton X-100 in H2O   |             | 2/28/2018 10:23:34 AM  |
| Buffer position 1                         | pH7 Wash                   |             | 2/28/2018 10:24:06 AM  |
| Buffer position 2                         | pH 7                       |             | 2/28/2018 10:24:08 AM  |
| Storage position                          |                            |             | 2/28/2018 10:21:14 AM  |
| Wash water                                | 8.5e+003 mL                | 02-27-2018  | 2/27/2018 9:54:39 AM   |
| Waste                                     | 7e+003 mL                  |             | 11/28/2017 10:36:29 AM |
| Temperature controller                    |                            |             | 8/5/2010 6:35:13 AM    |
| Turbidity detector                        |                            |             | 3/31/2009 5:24:45 AM   |
| Spectrometer                              |                            | 074811      | 11/23/2010 11:22:28 AM |
| Dip probe                                 |                            | 10196       |                        |
| Wavelength coefficient A0                 | 183.333                    |             |                        |
| Wavelength coefficient A1                 | 2.21568                    |             |                        |
| Wavelength coefficient A2                 | -0.000289308               |             |                        |
| Total lamp lit time                       | 112:08:55                  |             | 11/23/2010 11:22:28 AM |
| Calibrated on                             | 2/27/2018 10:40:38 AM      |             |                        |
| Integration time                          | 40                         |             |                        |
| Scans averaged                            | 10                         |             |                        |
| Autoloader                                |                            | T3AL1200345 | 11/10/2015 9:34:13 AM  |
| Left-right axis firmware version          | 1.17 AI1DI2DO2 Stepper 2   |             |                        |
| Front-back axis firmware version          | 1.17 AI1DI2DO2 Stepper 2   |             |                        |
| Vertical axis firmware version            | 1.17 AI1DI2DO2 Stepper 2   |             |                        |
| Chassis I/O firmware version              | 1.11 AI1DI0DO4 Norgren I/O |             |                        |
| Configuration                             |                            |             |                        |
| Alternate titration position              | Titration position         |             |                        |
| Alternate reference position              | Reference position         |             |                        |
| Maximum standard vial volume              | 3.50 mL                    |             |                        |
| Maximum alternate vial volume             | 25.00 mL                   |             |                        |
| Automatic action idle period              | 5 minute(s)                |             |                        |
| Titration tube volume                     | 1.3 mL                     |             |                        |
| Syringe flush count                       | 3.50                       |             |                        |
| Flowing wash pump volume                  | 20.0 mL                    |             |                        |
| Flowing wash stir duration                | 5 s                        |             |                        |
| Flowing wash stir speed                   | 30%                        |             |                        |
| Solvent wash stir duration                | 5 s                        |             |                        |
| Solvent wash stir speed                   | 30%                        |             |                        |
| Surfactant wash stir duration             | 5 s                        |             |                        |
| Surfactant wash stir speed                | 30%                        |             |                        |
| E0 calibration minimum number of points   | 10                         |             |                        |
| E0 calibration maximum standard deviation | 0.01500                    |             |                        |
| E0 calibration timeout period             | 60 s                       |             |                        |
| E0 calibration stir duration              | 5 s                        |             |                        |
| E0 calibration preparation stir speed     | 30%                        |             |                        |
| E0 calibration buffer wash stir duration  | 5 s                        |             |                        |
| E0 calibration buffer wash stir speed     | 30%                        |             |                        |
| E0 calibration reading stir speed         | 0%                         |             |                        |

Sample name: **M11\_octanol** Experiment start time: **3/1/2018 1:21:08 AM**  
 Assay name: **pH-metric high logP** Analyst: **Pion**  
 Assay ID: **18C-01002** Instrument ID: **T312060**  
 Filename: **C:\Sirius\_T3\Mehtap\20180228\_exp28\_logP\_T3-2\18C-01002\_M11\_octanol\_pH-metric high logP.t3r**

## Instrument Settings (continued)

| Setting                                     | Value   | Batch Id | Install date |
|---------------------------------------------|---------|----------|--------------|
| Spectrometer calibration stir duration      | 5 s     |          |              |
| Spectrometer calibration stir speed         | 30%     |          |              |
| Spectrometer calibration wash pump volume   | 20.0 mL |          |              |
| Spectrometer calibration wash stir duration | 5 s     |          |              |
| Spectrometer calibration wash stir speed    | 30%     |          |              |
| Overhead dispense height                    | 10000   |          |              |

## Refinement Settings

| Setting                        | Value    | Default value |
|--------------------------------|----------|---------------|
| Turbidity detection method     | None     | None          |
| Turbidity wavelength to assess | 500.0 nm | 500.0 nm      |
| Turbidity maximum absorbance   | 0.100    | 0.100         |
| Turbidity probe threshold      | 50.00    | 50.00         |

## Experiment Log

[2:37] Air gap created for Water (0.15 M KCl)  
 [2:37] Air gap created for Acid (0.5 M HCl)  
 [2:38] Air gap created for Base (0.5 M KOH)  
 [2:38] Air gap released for Water (0.15 M KCl)  
 [2:42] Titrator arm moved over Titration position  
 [2:42] Titration 1 of 3  
 [2:42] Adding initial titrants  
 [2:42] Automatically add 1.50000 mL of water  
 [3:07] Dispensed 1.500000 mL of Water (0.15 M KCl)  
 [3:11] Titrator arm moved over Drain  
 [8:53] Titrator arm moved to Titration position  
 [8:53] Argon flow rate set to 100  
 [8:53] Stirrer speed set to 10  
 [8:58] Automatically add 0.02000 mL of Octanol  
 [8:58] Dispensed 0.019991 mL of Octanol  
 [8:59] Initial pH = 8.06  
 [8:59] Iterative adjust 8.06 -> 2.00  
 [8:59] pH 8.06 -> 2.00  
 [9:01] Air gap released for Acid (0.5 M HCl)  
 [9:02] Dispensed 0.051529 mL of Acid (0.5 M HCl)  
 [9:07] Holding pH 2.00  
 [11:07] Stirrer speed set to 0  
 [11:07] Stirrer speed set to 50  
 [11:07] Iterative adjust 1.98 -> 2.00  
 [11:07] pH 1.98 -> 2.00  
 [11:08] Air gap released for Base (0.5 M KOH)  
 [11:09] Dispensed 0.001787 mL of Base (0.5 M KOH)  
 [11:59] Stirrer speed set to 0  
 [12:09] Datapoint id 1 collected  
 [12:09] Stirrer speed set to 50  
 [12:14] pH 2.01 -> 2.21  
 [12:14] Using cautious pH adjust  
 [12:14] Dispensed 0.007855 mL of Base (0.5 M KOH)  
 [12:19] Stepping pH = 2.09  
 [12:20] Dispensed 0.006232 mL of Base (0.5 M KOH)  
 [12:25] Stepping pH = 2.19  
 [12:25] Dispensed 0.001129 mL of Base (0.5 M KOH)  
 [12:30] Stepping pH = 2.21  
 [12:45] Stirrer speed set to 0  
 [12:55] Datapoint id 2 collected  
 [12:55] Charge balance equation is out by 3.1%  
 [12:55] Stirrer speed set to 50

Sample name: **M11\_octanol**  
Assay name: **pH-metric high logP**  
Assay ID: **18C-01002**  
Filename: **C:\Sirius\_T3\Mehtap\20180228\_exp28\_logP\_T3-2\18C-01002\_M11\_octanol\_pH-metric high logP.t3r**

Experiment start time: **3/1/2018 1:21:08 AM**  
Analyst: **Pion**  
Instrument ID: **T312060**

## Experiment Log (continued)

[13:00] pH 2.22 -> 2.42  
[13:00] Using charge balance adjust  
[13:01] Dispensed 0.009713 mL of Base (0.5 M KOH)  
[13:21] Stirrer speed set to 0  
[13:31] Datapoint id 3 collected  
[13:31] Charge balance equation is out by 7.5%  
[13:31] Stirrer speed set to 50  
[13:36] pH 2.44 -> 2.64  
[13:36] Using charge balance adjust  
[13:36] Dispensed 0.006021 mL of Base (0.5 M KOH)  
[13:56] Stirrer speed set to 0  
[14:06] Datapoint id 4 collected  
[14:06] Charge balance equation is out by -3.5%  
[14:06] Stirrer speed set to 50  
[14:11] pH 2.64 -> 2.84  
[14:11] Using charge balance adjust  
[14:12] Dispensed 0.004069 mL of Base (0.5 M KOH)  
[14:32] Stirrer speed set to 0  
[14:42] Datapoint id 5 collected  
[14:42] Charge balance equation is out by 10.1%  
[14:42] Stirrer speed set to 50  
[14:47] pH 2.86 -> 3.06  
[14:47] Using charge balance adjust  
[14:47] Dispensed 0.002846 mL of Base (0.5 M KOH)  
[15:07] Stirrer speed set to 0  
[15:17] Datapoint id 6 collected  
[15:17] Charge balance equation is out by -2.6%  
[15:17] Stirrer speed set to 50  
[15:22] pH 3.07 -> 3.27  
[15:22] Using charge balance adjust  
[15:23] Dispensed 0.002258 mL of Base (0.5 M KOH)  
[15:43] Stirrer speed set to 0  
[15:53] Datapoint id 7 collected  
[15:53] Charge balance equation is out by -2.0%  
[15:53] Stirrer speed set to 50  
[15:58] pH 3.27 -> 3.47  
[15:58] Using charge balance adjust  
[15:58] Dispensed 0.001929 mL of Base (0.5 M KOH)  
[16:18] Stirrer speed set to 0  
[16:28] Datapoint id 8 collected  
[16:28] Charge balance equation is out by 8.1%  
[16:28] Stirrer speed set to 50  
[16:33] pH 3.49 -> 3.69  
[16:33] Using charge balance adjust  
[16:34] Dispensed 0.001693 mL of Base (0.5 M KOH)  
[16:54] Stirrer speed set to 0  
[17:04] Datapoint id 9 collected  
[17:04] Charge balance equation is out by 8.4%  
[17:04] Stirrer speed set to 50  
[17:09] pH 3.71 -> 3.91  
[17:09] Using charge balance adjust  
[17:09] Dispensed 0.001435 mL of Base (0.5 M KOH)  
[17:29] Stirrer speed set to 0  
[17:40] Datapoint id 10 collected  
[17:40] Charge balance equation is out by -7.0%  
[17:40] Stirrer speed set to 50  
[17:45] pH 3.90 -> 4.10  
[17:45] Using charge balance adjust  
[17:45] Dispensed 0.001176 mL of Base (0.5 M KOH)

Sample name: **M11\_octanol**  
Assay name: **pH-metric high logP**  
Assay ID: **18C-01002**  
Filename: **C:\Sirius\_T3\Mehtap\20180228\_exp28\_logP\_T3-2\18C-01002\_M11\_octanol\_pH-metric high logP.t3r**

Experiment start time: **3/1/2018 1:21:08 AM**  
Analyst: **Pion**  
Instrument ID: **T312060**

## Experiment Log (continued)

[18:05] Stirrer speed set to 0  
[18:15] Datapoint id 11 collected  
[18:15] Charge balance equation is out by -8.8%  
[18:15] Stirrer speed set to 50  
[18:20] pH 4.09 -> 4.29  
[18:20] Using charge balance adjust  
[18:20] Dispensed 0.000917 mL of Base (0.5 M KOH)  
[18:41] Stirrer speed set to 0  
[18:51] Datapoint id 12 collected  
[18:51] Charge balance equation is out by -6.3%  
[18:51] Stirrer speed set to 50  
[18:56] pH 4.28 -> 4.48  
[18:56] Using charge balance adjust  
[18:56] Dispensed 0.000682 mL of Base (0.5 M KOH)  
[19:16] Stirrer speed set to 0  
[19:26] Datapoint id 13 collected  
[19:26] Charge balance equation is out by -8.5%  
[19:26] Stirrer speed set to 50  
[19:32] pH 4.47 -> 4.67  
[19:32] Using charge balance adjust  
[19:32] Dispensed 0.000470 mL of Base (0.5 M KOH)  
[19:52] Stirrer speed set to 0  
[20:02] Datapoint id 14 collected  
[20:02] Charge balance equation is out by -10.3%  
[20:02] Stirrer speed set to 50  
[20:07] pH 4.65 -> 4.85  
[20:07] Using charge balance adjust  
[20:07] Dispensed 0.000329 mL of Base (0.5 M KOH)  
[20:27] Stirrer speed set to 0  
[20:41] Datapoint id 15 collected  
[20:41] Charge balance equation is out by -2.0%  
[20:41] Stirrer speed set to 50  
[20:46] pH 4.86 -> 5.06  
[20:46] Using charge balance adjust  
[20:46] Dispensed 0.000212 mL of Base (0.5 M KOH)  
[21:06] Stirrer speed set to 0  
[21:18] Datapoint id 16 collected  
[21:18] Charge balance equation is out by -17.2%  
[21:18] Stirrer speed set to 50  
[21:23] pH 5.03 -> 5.23  
[21:23] Using cautious pH adjust  
[21:23] Dispensed 0.000071 mL of Base (0.5 M KOH)  
[21:28] Stepping pH = 5.04  
[21:29] Dispensed 0.000235 mL of Base (0.5 M KOH)  
[21:34] Stepping pH = 5.67  
[21:49] Stirrer speed set to 0  
[22:11] Datapoint id 17 collected  
[22:11] Charge balance equation is out by -93.1%  
[22:11] Stirrer speed set to 50  
[22:16] pH 5.82 -> 6.02  
[22:16] Using cautious pH adjust  
[22:16] Dispensed 0.000024 mL of Base (0.5 M KOH)  
[22:21] Stepping pH = 5.84  
[22:22] Dispensed 0.000071 mL of Base (0.5 M KOH)  
[22:27] Stepping pH = 5.97  
[22:27] Dispensed 0.000024 mL of Base (0.5 M KOH)  
[22:32] Stepping pH = 6.20  
[22:47] Stirrer speed set to 0  
[23:27] Datapoint id 18 collected

Sample name: **M11\_octanol**  
Assay name: **pH-metric high logP**  
Assay ID: **18C-01002**  
Filename: **C:\Sirius\_T3\Mehtap\20180228\_exp28\_logP\_T3-2\18C-01002\_M11\_octanol\_pH-metric high logP.t3r**

Experiment start time: **3/1/2018 1:21:08 AM**  
Analyst: **Pion**  
Instrument ID: **T312060**

## Experiment Log (continued)

[23:27] Charge balance equation is out by -130.2%  
[23:27] Stirrer speed set to 50  
[23:32] pH 6.32 -> 6.52  
[23:32] Using cautious pH adjust  
[23:32] Dispensed 0.000024 mL of Base (0.5 M KOH)  
[23:37] Stepping pH = 6.38  
[23:37] Dispensed 0.000024 mL of Base (0.5 M KOH)  
[23:42] Stepping pH = 6.54  
[23:57] Stirrer speed set to 0  
[24:42] Datapoint id 19 collected  
[24:42] Charge balance equation is out by -11.0%  
[24:42] Stirrer speed set to 50  
[24:47] pH 6.49 -> 6.69  
[24:47] Using charge balance adjust  
[24:47] Dispensed 0.000047 mL of Base (0.5 M KOH)  
[25:07] Stirrer speed set to 0  
[25:52] Datapoint id 20 collected  
[25:52] Charge balance equation is out by 7.8%  
[25:52] Stirrer speed set to 50  
[25:57] pH 6.69 -> 6.89  
[25:57] Using charge balance adjust  
[25:57] Dispensed 0.000024 mL of Base (0.5 M KOH)  
[26:17] Stirrer speed set to 0  
[27:09] Datapoint id 21 collected  
[27:09] Charge balance equation is out by 15.7%  
[27:09] Stirrer speed set to 50  
[27:14] pH 6.96 -> 7.16  
[27:14] Using cautious pH adjust  
[27:14] Dispensed 0.000024 mL of Base (0.5 M KOH)  
[27:19] Stepping pH = 7.08  
[27:19] Dispensed 0.000024 mL of Base (0.5 M KOH)  
[27:24] Stepping pH = 7.29  
[27:40] Stirrer speed set to 0  
[28:40] Datapoint id 22 collected  
[28:40] Charge balance equation is out by -110.3%  
[28:40] Stirrer speed set to 50  
[28:45] pH 7.43 -> 7.63  
[28:45] Using cautious pH adjust  
[28:45] Dispensed 0.000024 mL of Base (0.5 M KOH)  
[28:50] Stepping pH = 7.47  
[28:50] Dispensed 0.000024 mL of Base (0.5 M KOH)  
[28:55] Stepping pH = 7.66  
[29:10] Stirrer speed set to 0  
[30:10] Datapoint id 23 collected  
[30:10] Charge balance equation is out by -359.3%  
[30:10] Stirrer speed set to 50  
[30:15] pH 7.88 -> 8.08  
[30:15] Using cautious pH adjust  
[30:15] Dispensed 0.000024 mL of Base (0.5 M KOH)  
[30:20] Stepping pH = 7.89  
[30:20] Dispensed 0.000024 mL of Base (0.5 M KOH)  
[30:25] Stepping pH = 8.10  
[30:40] Stirrer speed set to 0  
[31:40] Datapoint id 24 collected  
[31:40] Charge balance equation is out by -547.1%  
[31:40] Stirrer speed set to 50  
[31:46] pH 8.15 -> 8.35  
[31:46] Using cautious pH adjust  
[31:46] Dispensed 0.000024 mL of Base (0.5 M KOH)

Sample name: **M11\_octanol**  
Assay name: **pH-metric high logP**  
Assay ID: **18C-01002**  
Filename: **C:\Sirius\_T3\Mehtap\20180228\_exp28\_logP\_T3-2\18C-01002\_M11\_octanol\_pH-metric high logP.t3r**

Experiment start time: **3/1/2018 1:21:08 AM**  
Analyst: **Pion**  
Instrument ID: **T312060**

## Experiment Log (continued)

[31:51] Stepping pH = 8.14  
[31:51] Dispensed 0.000024 mL of Base (0.5 M KOH)  
[31:56] Stepping pH = 8.26  
[31:56] Dispensed 0.000024 mL of Base (0.5 M KOH)  
[32:01] Stepping pH = 8.46  
[32:16] Stirrer speed set to 0  
[33:11] Datapoint id 25 collected  
[33:11] Charge balance equation is out by -675.1%  
[33:11] Stirrer speed set to 50  
[33:16] pH 8.52 -> 8.72  
[33:16] Using cautious pH adjust  
[33:16] Dispensed 0.000024 mL of Base (0.5 M KOH)  
[33:21] Stepping pH = 8.57  
[33:21] Dispensed 0.000024 mL of Base (0.5 M KOH)  
[33:26] Stepping pH = 8.67  
[33:26] Dispensed 0.000024 mL of Base (0.5 M KOH)  
[33:31] Stepping pH = 8.76  
[33:46] Stirrer speed set to 0  
[34:27] Datapoint id 26 collected  
[34:27] Charge balance equation is out by -301.4%  
[34:27] Stirrer speed set to 50  
[34:32] pH 8.73 -> 8.93  
[34:32] Using cautious pH adjust  
[34:32] Dispensed 0.000024 mL of Base (0.5 M KOH)  
[34:37] Stepping pH = 8.74  
[34:37] Dispensed 0.000024 mL of Base (0.5 M KOH)  
[34:42] Stepping pH = 8.81  
[34:42] Dispensed 0.000047 mL of Base (0.5 M KOH)  
[34:47] Stepping pH = 8.96  
[35:02] Stirrer speed set to 0  
[35:37] Datapoint id 27 collected  
[35:37] Charge balance equation is out by -310.7%  
[35:37] Stirrer speed set to 50  
[35:43] pH 8.95 -> 9.05  
[35:43] Using cautious pH adjust  
[35:43] Dispensed 0.000024 mL of Base (0.5 M KOH)  
[35:48] Stepping pH = 8.95  
[35:48] Dispensed 0.000047 mL of Base (0.5 M KOH)  
[35:53] Stepping pH = 9.03  
[36:08] Stirrer speed set to 0  
[36:29] Datapoint id 28 collected  
[36:29] Charge balance equation is out by -289.1%  
[36:29] Titration 2 of 3  
[36:29] Adding initial titrants  
[36:29] Automatically add 0.05000 mL of Octanol  
[36:31] Dispensed 0.050000 mL of Octanol  
[36:31] Stirrer speed set to 10  
[36:32] Stirrer speed set to 55  
[36:32] Iterative adjust 9.08 -> 2.00  
[36:32] pH 9.08 -> 2.00  
[36:33] Dispensed 0.054139 mL of Acid (0.5 M HCl)  
[36:38] pH 2.02 -> 2.00  
[36:38] Dispensed 0.002352 mL of Acid (0.5 M HCl)  
[37:29] Stirrer speed set to 0  
[37:39] Datapoint id 29 collected  
[37:39] Stirrer speed set to 55  
[37:44] pH 1.97 -> 2.17  
[37:44] Using cautious pH adjust  
[37:44] Dispensed 0.009313 mL of Base (0.5 M KOH)



Sample name: **M11\_octanol**  
Assay name: **pH-metric high logP**  
Assay ID: **18C-01002**  
Filename: **C:\Sirius\_T3\Mehtap\20180228\_exp28\_logP\_T3-2\18C-01002\_M11\_octanol\_pH-metric high logP.t3r**

Experiment start time: **3/1/2018 1:21:08 AM**  
Analyst: **Pion**  
Instrument ID: **T312060**

## Experiment Log (continued)

[37:49] Stepping pH = 2.06  
[37:50] Dispensed 0.006538 mL of Base (0.5 M KOH)  
[37:55] Stepping pH = 2.15  
[37:55] Dispensed 0.001458 mL of Base (0.5 M KOH)  
[38:00] Stepping pH = 2.17  
[38:15] Stirrer speed set to 0  
[38:25] Datapoint id 30 collected  
[38:25] Charge balance equation is out by 7.0%  
[38:25] Stirrer speed set to 55  
[38:30] pH 2.17 -> 2.37  
[38:30] Using charge balance adjust  
[38:30] Dispensed 0.011783 mL of Base (0.5 M KOH)  
[38:51] Stirrer speed set to 0  
[39:01] Datapoint id 31 collected  
[39:01] Charge balance equation is out by 12.3%  
[39:01] Stirrer speed set to 55  
[39:06] pH 2.40 -> 2.60  
[39:06] Using charge balance adjust  
[39:06] Dispensed 0.007291 mL of Base (0.5 M KOH)  
[39:26] Stirrer speed set to 0  
[39:36] Datapoint id 32 collected  
[39:36] Charge balance equation is out by 5.2%  
[39:36] Stirrer speed set to 55  
[39:41] pH 2.62 -> 2.82  
[39:41] Using charge balance adjust  
[39:42] Dispensed 0.004892 mL of Base (0.5 M KOH)  
[40:02] Stirrer speed set to 0  
[40:12] Datapoint id 33 collected  
[40:12] Charge balance equation is out by 2.4%  
[40:12] Stirrer speed set to 55  
[40:17] pH 2.83 -> 3.03  
[40:17] Using charge balance adjust  
[40:17] Dispensed 0.003551 mL of Base (0.5 M KOH)  
[40:37] Stirrer speed set to 0  
[40:47] Datapoint id 34 collected  
[40:47] Charge balance equation is out by -4.4%  
[40:47] Stirrer speed set to 55  
[40:52] pH 3.02 -> 3.22  
[40:52] Using charge balance adjust  
[40:52] Dispensed 0.002752 mL of Base (0.5 M KOH)  
[41:13] Stirrer speed set to 0  
[41:23] Datapoint id 35 collected  
[41:23] Charge balance equation is out by 5.0%  
[41:23] Stirrer speed set to 55  
[41:28] pH 3.24 -> 3.44  
[41:28] Using charge balance adjust  
[41:28] Dispensed 0.002140 mL of Base (0.5 M KOH)  
[41:48] Stirrer speed set to 0  
[41:58] Datapoint id 36 collected  
[41:58] Charge balance equation is out by 37.0%  
[41:58] Stirrer speed set to 55  
[42:03] pH 3.51 -> 3.71  
[42:03] Using cautious pH adjust  
[42:03] Dispensed 0.000753 mL of Base (0.5 M KOH)  
[42:08] Stepping pH = 3.61  
[42:09] Dispensed 0.000517 mL of Base (0.5 M KOH)  
[42:14] Stepping pH = 3.70  
[42:14] Dispensed 0.000047 mL of Base (0.5 M KOH)  
[42:19] Stepping pH = 3.71

Sample name: **M11\_octanol**  
Assay name: **pH-metric high logP**  
Assay ID: **18C-01002**  
Filename: **C:\Sirius\_T3\Mehtap\20180228\_exp28\_logP\_T3-2\18C-01002\_M11\_octanol\_pH-metric high logP.t3r**

Experiment start time: **3/1/2018 1:21:08 AM**  
Analyst: **Pion**  
Instrument ID: **T312060**

## Experiment Log (continued)

[42:34] Stirrer speed set to 0  
[42:44] Datapoint id 37 collected  
[42:44] Charge balance equation is out by 11.6%  
[42:44] Stirrer speed set to 55  
[42:49] pH 3.71 -> 3.91  
[42:49] Using charge balance adjust  
[42:49] Dispensed 0.001105 mL of Base (0.5 M KOH)  
[43:09] Stirrer speed set to 0  
[43:19] Datapoint id 38 collected  
[43:19] Charge balance equation is out by 21.3%  
[43:19] Stirrer speed set to 55  
[43:24] pH 3.96 -> 4.16  
[43:24] Using cautious pH adjust  
[43:24] Dispensed 0.000353 mL of Base (0.5 M KOH)  
[43:30] Stepping pH = 4.04  
[43:30] Dispensed 0.000306 mL of Base (0.5 M KOH)  
[43:35] Stepping pH = 4.14  
[43:35] Dispensed 0.000047 mL of Base (0.5 M KOH)  
[43:40] Stepping pH = 4.16  
[43:55] Stirrer speed set to 0  
[44:06] Datapoint id 39 collected  
[44:06] Charge balance equation is out by -1.4%  
[44:06] Stirrer speed set to 55  
[44:11] pH 4.17 -> 4.37  
[44:11] Using charge balance adjust  
[44:11] Dispensed 0.000494 mL of Base (0.5 M KOH)  
[44:31] Stirrer speed set to 0  
[44:41] Datapoint id 40 collected  
[44:41] Charge balance equation is out by 26.0%  
[44:41] Stirrer speed set to 55  
[44:46] pH 4.42 -> 4.62  
[44:46] Using cautious pH adjust  
[44:46] Dispensed 0.000141 mL of Base (0.5 M KOH)  
[44:51] Stepping pH = 4.46  
[44:51] Dispensed 0.000259 mL of Base (0.5 M KOH)  
[44:56] Stepping pH = 4.72  
[45:12] Stirrer speed set to 0  
[45:25] Datapoint id 41 collected  
[45:25] Charge balance equation is out by -38.6%  
[45:25] Stirrer speed set to 55  
[45:30] pH 4.78 -> 4.98  
[45:30] Using cautious pH adjust  
[45:30] Dispensed 0.000071 mL of Base (0.5 M KOH)  
[45:35] Stepping pH = 4.79  
[45:35] Dispensed 0.000188 mL of Base (0.5 M KOH)  
[45:40] Stepping pH = 5.22  
[45:55] Stirrer speed set to 0  
[46:11] Datapoint id 42 collected  
[46:11] Charge balance equation is out by -92.6%  
[46:11] Stirrer speed set to 55  
[46:16] pH 5.29 -> 5.49  
[46:16] Using cautious pH adjust  
[46:16] Dispensed 0.000024 mL of Base (0.5 M KOH)  
[46:21] Stepping pH = 5.29  
[46:21] Dispensed 0.000141 mL of Base (0.5 M KOH)  
[46:26] Stepping pH = 5.90  
[46:41] Stirrer speed set to 0  
[47:27] Datapoint id 43 collected  
[47:27] Charge balance equation is out by -206.7%



Sample name: **M11\_octanol**  
 Assay name: **pH-metric high logP**  
 Assay ID: **18C-01002**  
 Filename: **C:\Sirius\_T3\Mehtap\20180228\_exp28\_logP\_T3-2\18C-01002\_M11\_octanol\_pH-metric high logP.t3r**

Experiment start time: **3/1/2018 1:21:08 AM**  
 Analyst: **Pion**  
 Instrument ID: **T312060**

## Experiment Log (continued)

[47:27] Stirrer speed set to 55  
 [47:32] pH 6.12 -> 6.32  
 [47:32] Using cautious pH adjust  
 [47:32] Dispensed 0.000024 mL of Base (0.5 M KOH)  
 [47:37] Stepping pH = 6.14  
 [47:37] Dispensed 0.000047 mL of Base (0.5 M KOH)  
 [47:43] Stepping pH = 6.30  
 [47:43] Dispensed 0.000024 mL of Base (0.5 M KOH)  
 [47:48] Stepping pH = 6.62  
 [48:03] Stirrer speed set to 0  
 [49:03] Datapoint id 44 collected  
 [49:03] Charge balance equation is out by -118.6%  
 [49:03] Stirrer speed set to 55  
 [49:08] pH 6.74 -> 6.94  
 [49:08] Using cautious pH adjust  
 [49:08] Dispensed 0.000024 mL of Base (0.5 M KOH)  
 [49:13] Stepping pH = 6.76  
 [49:13] Dispensed 0.000047 mL of Base (0.5 M KOH)  
 [49:18] Stepping pH = 7.01  
 [49:33] Stirrer speed set to 0  
 [50:33] Datapoint id 45 collected  
 [50:33] Charge balance equation is out by -103.4%  
 [50:33] Stirrer speed set to 55  
 [50:38] pH 7.33 -> 7.53  
 [50:38] Using cautious pH adjust  
 [50:38] Dispensed 0.000024 mL of Base (0.5 M KOH)  
 [50:43] Stepping pH = 7.29  
 [50:43] Dispensed 0.000024 mL of Base (0.5 M KOH)  
 [50:49] Stepping pH = 7.56  
 [51:04] Stirrer speed set to 0  
 [52:04] Datapoint id 46 collected  
 [52:04] Charge balance equation is out by -392.4%  
 [52:04] Stirrer speed set to 55  
 [52:09] pH 7.78 -> 7.98  
 [52:09] Using cautious pH adjust  
 [52:09] Dispensed 0.000024 mL of Base (0.5 M KOH)  
 [52:14] Stepping pH = 7.73  
 [52:14] Dispensed 0.000024 mL of Base (0.5 M KOH)  
 [52:19] Stepping pH = 7.78  
 [52:19] Dispensed 0.000047 mL of Base (0.5 M KOH)  
 [52:24] Stepping pH = 8.11  
 [52:39] Stirrer speed set to 0  
 [53:39] Datapoint id 47 collected  
 [53:39] Charge balance equation is out by -1,044.0%  
 [53:39] Stirrer speed set to 55  
 [53:45] pH 7.92 -> 8.12  
 [53:45] Using cautious pH adjust  
 [53:45] Dispensed 0.000024 mL of Base (0.5 M KOH)  
 [53:50] Stepping pH = 7.88  
 [53:50] Dispensed 0.000024 mL of Base (0.5 M KOH)  
 [53:55] Stepping pH = 7.86  
 [53:55] Dispensed 0.000118 mL of Base (0.5 M KOH)  
 [54:00] Stepping pH = 8.83  
 [54:15] Stirrer speed set to 0  
 [54:43] Datapoint id 48 collected  
 [54:43] Charge balance equation is out by -2,120.7%  
 [54:43] Stirrer speed set to 55  
 [54:48] pH 8.82 -> 9.02  
 [54:48] Using cautious pH adjust

Sample name: **M11\_octanol**  
Assay name: **pH-metric high logP**  
Assay ID: **18C-01002**  
Filename: **C:\Sirius\_T3\Mehtap\20180228\_exp28\_logP\_T3-2\18C-01002\_M11\_octanol\_pH-metric high logP.t3r**

Experiment start time: **3/1/2018 1:21:08 AM**  
Analyst: **Pion**  
Instrument ID: **T312060**

## Experiment Log (continued)

[54:48] Dispensed 0.000024 mL of Base (0.5 M KOH)  
[54:53] Stepping pH = 8.83  
[54:53] Dispensed 0.000047 mL of Base (0.5 M KOH)  
[54:58] Stepping pH = 8.90  
[54:59] Dispensed 0.000047 mL of Base (0.5 M KOH)  
[55:04] Stepping pH = 9.03  
[55:19] Stirrer speed set to 0  
[55:43] Datapoint id 49 collected  
[55:43] Charge balance equation is out by -286.1%  
[55:43] Titration 3 of 3  
[55:43] Adding initial titrants  
[55:43] Automatically add 0.15000 mL of Octanol  
[55:47] Dispensed 0.150000 mL of Octanol  
[55:47] Stirrer speed set to 10  
[55:48] Stirrer speed set to 60  
[55:48] Iterative adjust 9.05 -> 2.00  
[55:48] pH 9.05 -> 2.00  
[55:50] Dispensed 0.056397 mL of Acid (0.5 M HCl)  
[55:55] pH 2.05 -> 2.00  
[55:55] Dispensed 0.005174 mL of Acid (0.5 M HCl)  
[56:45] Stirrer speed set to 0  
[56:55] Datapoint id 50 collected  
[56:55] Stirrer speed set to 60  
[57:00] pH 1.97 -> 2.17  
[57:00] Using cautious pH adjust  
[57:01] Dispensed 0.010113 mL of Base (0.5 M KOH)  
[57:06] Stepping pH = 2.05  
[57:06] Dispensed 0.007949 mL of Base (0.5 M KOH)  
[57:11] Stepping pH = 2.15  
[57:11] Dispensed 0.001129 mL of Base (0.5 M KOH)  
[57:16] Stepping pH = 2.17  
[57:31] Stirrer speed set to 0  
[57:41] Datapoint id 51 collected  
[57:41] Charge balance equation is out by 5.1%  
[57:41] Stirrer speed set to 60  
[57:47] pH 2.17 -> 2.37  
[57:47] Using charge balance adjust  
[57:47] Dispensed 0.012959 mL of Base (0.5 M KOH)  
[58:07] Stirrer speed set to 0  
[58:17] Datapoint id 52 collected  
[58:17] Charge balance equation is out by 9.6%  
[58:17] Stirrer speed set to 60  
[58:22] pH 2.40 -> 2.60  
[58:22] Using charge balance adjust  
[58:23] Dispensed 0.008278 mL of Base (0.5 M KOH)  
[58:43] Stirrer speed set to 0  
[58:53] Datapoint id 53 collected  
[58:53] Charge balance equation is out by 10.7%  
[58:53] Stirrer speed set to 60  
[58:58] pH 2.62 -> 2.82  
[58:58] Using charge balance adjust  
[58:58] Dispensed 0.005433 mL of Base (0.5 M KOH)  
[59:18] Stirrer speed set to 0  
[59:29] Datapoint id 54 collected  
[59:29] Charge balance equation is out by -3.5%  
[59:29] Stirrer speed set to 60  
[59:34] pH 2.82 -> 3.02  
[59:34] Using charge balance adjust  
[59:34] Dispensed 0.003857 mL of Base (0.5 M KOH)

Sample name: **M11\_octanol**  
Assay name: **pH-metric high logP**  
Assay ID: **18C-01002**  
Filename: **C:\Sirius\_T3\Mehtap\20180228\_exp28\_logP\_T3-2\18C-01002\_M11\_octanol\_pH-metric high logP.t3r**

Experiment start time: **3/1/2018 1:21:08 AM**  
Analyst: **Pion**  
Instrument ID: **T312060**

## Experiment Log (continued)

[59:55] Stirrer speed set to 0  
[1:00:05] Datapoint id 55 collected  
[1:00:05] Charge balance equation is out by 4.7%  
[1:00:05] Stirrer speed set to 60  
[1:00:10] pH 3.04 -> 3.24  
[1:00:10] Using charge balance adjust  
[1:00:10] Dispensed 0.002681 mL of Base (0.5 M KOH)  
[1:00:30] Stirrer speed set to 0  
[1:00:40] Datapoint id 56 collected  
[1:00:40] Charge balance equation is out by 20.3%  
[1:00:40] Stirrer speed set to 60  
[1:00:45] pH 3.28 -> 3.48  
[1:00:45] Using cautious pH adjust  
[1:00:45] Dispensed 0.000870 mL of Base (0.5 M KOH)  
[1:00:50] Stepping pH = 3.37  
[1:00:50] Dispensed 0.000706 mL of Base (0.5 M KOH)  
[1:00:56] Stepping pH = 3.47  
[1:00:56] Dispensed 0.000071 mL of Base (0.5 M KOH)  
[1:01:01] Stepping pH = 3.49  
[1:01:16] Stirrer speed set to 0  
[1:01:26] Datapoint id 57 collected  
[1:01:26] Charge balance equation is out by 5.0%  
[1:01:26] Stirrer speed set to 60  
[1:01:31] pH 3.49 -> 3.69  
[1:01:31] Using charge balance adjust  
[1:01:31] Dispensed 0.001152 mL of Base (0.5 M KOH)  
[1:01:51] Stirrer speed set to 0  
[1:02:01] Datapoint id 58 collected  
[1:02:01] Charge balance equation is out by 16.7%  
[1:02:01] Stirrer speed set to 60  
[1:02:06] pH 3.73 -> 3.93  
[1:02:06] Using cautious pH adjust  
[1:02:07] Dispensed 0.000353 mL of Base (0.5 M KOH)  
[1:02:12] Stepping pH = 3.78  
[1:02:12] Dispensed 0.000564 mL of Base (0.5 M KOH)  
[1:02:17] Stepping pH = 3.98  
[1:02:32] Stirrer speed set to 0  
[1:02:42] Datapoint id 59 collected  
[1:02:42] Charge balance equation is out by -28.5%  
[1:02:42] Stirrer speed set to 60  
[1:02:47] pH 4.01 -> 4.21  
[1:02:47] Using cautious pH adjust  
[1:02:47] Dispensed 0.000188 mL of Base (0.5 M KOH)  
[1:02:52] Stepping pH = 4.05  
[1:02:52] Dispensed 0.000353 mL of Base (0.5 M KOH)  
[1:02:57] Stepping pH = 4.32  
[1:03:12] Stirrer speed set to 0  
[1:03:22] Datapoint id 60 collected  
[1:03:22] Charge balance equation is out by -40.2%  
[1:03:22] Stirrer speed set to 60  
[1:03:28] pH 4.36 -> 4.56  
[1:03:28] Using cautious pH adjust  
[1:03:28] Dispensed 0.000094 mL of Base (0.5 M KOH)  
[1:03:33] Stepping pH = 4.38  
[1:03:33] Dispensed 0.000212 mL of Base (0.5 M KOH)  
[1:03:38] Stepping pH = 4.73  
[1:03:53] Stirrer speed set to 0  
[1:04:05] Datapoint id 61 collected  
[1:04:05] Charge balance equation is out by -65.1%

Sample name: **M11\_octanol**  
 Assay name: **pH-metric high logP**  
 Assay ID: **18C-01002**  
 Filename: **C:\Sirius\_T3\Mehtap\20180228\_exp28\_logP\_T3-2\18C-01002\_M11\_octanol\_pH-metric high logP.t3r**

Experiment start time: **3/1/2018 1:21:08 AM**  
 Analyst: **Pion**  
 Instrument ID: **T312060**

## Experiment Log (continued)

[1:04:05] Stirrer speed set to 60  
 [1:04:10] pH 4.80 -> 5.00  
 [1:04:10] Using cautious pH adjust  
 [1:04:10] Dispensed 0.000047 mL of Base (0.5 M KOH)  
 [1:04:15] Stepping pH = 4.83  
 [1:04:15] Dispensed 0.000071 mL of Base (0.5 M KOH)  
 [1:04:20] Stepping pH = 4.94  
 [1:04:21] Dispensed 0.000024 mL of Base (0.5 M KOH)  
 [1:04:26] Stepping pH = 5.04  
 [1:04:41] Stirrer speed set to 0  
 [1:04:54] Datapoint id 62 collected  
 [1:04:54] Charge balance equation is out by -98.4%  
 [1:04:54] Stirrer speed set to 60  
 [1:04:59] pH 5.08 -> 5.28  
 [1:04:59] Using cautious pH adjust  
 [1:04:59] Dispensed 0.000024 mL of Base (0.5 M KOH)  
 [1:05:04] Stepping pH = 5.13  
 [1:05:05] Dispensed 0.000024 mL of Base (0.5 M KOH)  
 [1:05:10] Stepping pH = 5.22  
 [1:05:10] Dispensed 0.000024 mL of Base (0.5 M KOH)  
 [1:05:15] Stepping pH = 5.32  
 [1:05:30] Stirrer speed set to 0  
 [1:05:44] Datapoint id 63 collected  
 [1:05:44] Charge balance equation is out by -64.2%  
 [1:05:44] Stirrer speed set to 60  
 [1:05:50] pH 5.43 -> 5.63  
 [1:05:50] Using cautious pH adjust  
 [1:05:50] Dispensed 0.000024 mL of Base (0.5 M KOH)  
 [1:05:55] Stepping pH = 5.51  
 [1:05:55] Dispensed 0.000024 mL of Base (0.5 M KOH)  
 [1:06:00] Stepping pH = 5.65  
 [1:06:15] Stirrer speed set to 0  
 [1:06:51] Datapoint id 64 collected  
 [1:06:51] Charge balance equation is out by -14.9%  
 [1:06:51] Stirrer speed set to 60  
 [1:06:57] pH 5.73 -> 5.93  
 [1:06:57] Using charge balance adjust  
 [1:06:57] Dispensed 0.000047 mL of Base (0.5 M KOH)  
 [1:07:17] Stirrer speed set to 0  
 [1:07:57] Datapoint id 65 collected  
 [1:07:57] Charge balance equation is out by 69.9%  
 [1:07:57] Stirrer speed set to 60  
 [1:08:02] pH 6.06 -> 6.26  
 [1:08:02] Using cautious pH adjust  
 [1:08:02] Dispensed 0.000024 mL of Base (0.5 M KOH)  
 [1:08:08] Stepping pH = 6.22  
 [1:08:08] Dispensed 0.000024 mL of Base (0.5 M KOH)  
 [1:08:13] Stepping pH = 6.45  
 [1:08:28] Stirrer speed set to 0  
 [1:09:28] Datapoint id 66 collected  
 [1:09:28] Charge balance equation is out by 4.3%  
 [1:09:28] Stirrer speed set to 60  
 [1:09:33] pH 6.45 -> 6.65  
 [1:09:33] Using charge balance adjust  
 [1:09:33] Dispensed 0.000047 mL of Base (0.5 M KOH)  
 [1:09:53] Stirrer speed set to 0  
 [1:10:48] Datapoint id 67 collected  
 [1:10:48] Charge balance equation is out by -24.7%  
 [1:10:48] Stirrer speed set to 60

Sample name: **M11\_octanol**  
Assay name: **pH-metric high logP**  
Assay ID: **18C-01002**  
Filename: **C:\Sirius\_T3\Mehtap\20180228\_exp28\_logP\_T3-2\18C-01002\_M11\_octanol\_pH-metric high logP.t3r**

Experiment start time: **3/1/2018 1:21:08 AM**  
Analyst: **Pion**  
Instrument ID: **T312060**

## Experiment Log (continued)

[1:10:53] pH 6.58 -> 6.78  
[1:10:53] Using cautious pH adjust  
[1:10:53] Dispensed 0.000024 mL of Base (0.5 M KOH)  
[1:10:58] Stepping pH = 6.77  
[1:11:13] Stirrer speed set to 0  
[1:12:13] Datapoint id 68 collected  
[1:12:13] Charge balance equation is out by 47.7%  
[1:12:13] Stirrer speed set to 60  
[1:12:19] pH 6.87 -> 7.07  
[1:12:19] Using cautious pH adjust  
[1:12:19] Dispensed 0.000024 mL of Base (0.5 M KOH)  
[1:12:24] Stepping pH = 7.05  
[1:12:24] Dispensed 0.000024 mL of Base (0.5 M KOH)  
[1:12:29] Stepping pH = 7.33  
[1:12:44] Stirrer speed set to 0  
[1:13:44] Datapoint id 69 collected  
[1:13:44] Charge balance equation is out by -44.9%  
[1:13:44] Stirrer speed set to 60  
[1:13:49] pH 7.36 -> 7.56  
[1:13:49] Using cautious pH adjust  
[1:13:49] Dispensed 0.000024 mL of Base (0.5 M KOH)  
[1:13:54] Stepping pH = 7.45  
[1:13:54] Dispensed 0.000024 mL of Base (0.5 M KOH)  
[1:13:59] Stepping pH = 7.73  
[1:14:14] Stirrer speed set to 0  
[1:15:14] Datapoint id 70 collected  
[1:15:14] Charge balance equation is out by -212.1%  
[1:15:14] Stirrer speed set to 60  
[1:15:20] pH 7.77 -> 7.97  
[1:15:20] Using cautious pH adjust  
[1:15:20] Dispensed 0.000024 mL of Base (0.5 M KOH)  
[1:15:25] Stepping pH = 7.85  
[1:15:25] Dispensed 0.000024 mL of Base (0.5 M KOH)  
[1:15:30] Stepping pH = 8.04  
[1:15:45] Stirrer speed set to 0  
[1:16:45] Datapoint id 71 collected  
[1:16:45] Charge balance equation is out by -401.0%  
[1:16:45] Stirrer speed set to 60  
[1:16:50] pH 8.05 -> 8.25  
[1:16:50] Using cautious pH adjust  
[1:16:50] Dispensed 0.000024 mL of Base (0.5 M KOH)  
[1:16:55] Stepping pH = 8.15  
[1:16:55] Dispensed 0.000024 mL of Base (0.5 M KOH)  
[1:17:00] Stepping pH = 8.21  
[1:17:00] Dispensed 0.000024 mL of Base (0.5 M KOH)  
[1:17:06] Stepping pH = 8.19  
[1:17:06] Dispensed 0.000024 mL of Base (0.5 M KOH)  
[1:17:11] Stepping pH = 8.20  
[1:17:11] Dispensed 0.000024 mL of Base (0.5 M KOH)  
[1:17:16] Stepping pH = 8.32  
[1:17:31] Stirrer speed set to 0  
[1:18:31] Datapoint id 72 collected  
[1:18:31] Charge balance equation is out by -1,251.5%  
[1:18:31] Stirrer speed set to 60  
[1:18:36] pH 8.28 -> 8.48  
[1:18:36] Using cautious pH adjust  
[1:18:36] Dispensed 0.000024 mL of Base (0.5 M KOH)  
[1:18:41] Stepping pH = 8.27  
[1:18:41] Dispensed 0.000024 mL of Base (0.5 M KOH)

Sample name: **M11\_octanol**  
Assay name: **pH-metric high logP**  
Assay ID: **18C-01002**  
Filename: **C:\Sirius\_T3\Mehtap\20180228\_exp28\_logP\_T3-2\18C-01002\_M11\_octanol\_pH-metric high logP.t3r**

Experiment start time: **3/1/2018 1:21:08 AM**  
Analyst: **Pion**  
Instrument ID: **T312060**

## Experiment Log (continued)

[1:18:46] Stepping pH = 8.39  
[1:18:46] Dispensed 0.000024 mL of Base (0.5 M KOH)  
[1:18:51] Stepping pH = 8.53  
[1:19:07] Stirrer speed set to 0  
[1:19:40] Datapoint id 73 collected  
[1:19:40] Charge balance equation is out by -521.2%  
[1:19:40] Stirrer speed set to 60  
[1:19:45] pH 8.59 -> 8.79  
[1:19:45] Using cautious pH adjust  
[1:19:45] Dispensed 0.000024 mL of Base (0.5 M KOH)  
[1:19:51] Stepping pH = 8.65  
[1:19:51] Dispensed 0.000024 mL of Base (0.5 M KOH)  
[1:19:56] Stepping pH = 8.73  
[1:19:56] Dispensed 0.000024 mL of Base (0.5 M KOH)  
[1:20:01] Stepping pH = 8.81  
[1:20:16] Stirrer speed set to 0  
[1:21:00] Datapoint id 74 collected  
[1:21:00] Charge balance equation is out by -196.5%  
[1:21:00] Stirrer speed set to 60  
[1:21:05] pH 8.79 -> 8.99  
[1:21:05] Using cautious pH adjust  
[1:21:05] Dispensed 0.000024 mL of Base (0.5 M KOH)  
[1:21:10] Stepping pH = 8.78  
[1:21:10] Dispensed 0.000071 mL of Base (0.5 M KOH)  
[1:21:15] Stepping pH = 8.93  
[1:21:15] Dispensed 0.000024 mL of Base (0.5 M KOH)  
[1:21:21] Stepping pH = 9.00  
[1:21:36] Stirrer speed set to 0  
[1:21:49] Datapoint id 75 collected  
[1:21:49] Charge balance equation is out by -327.4%  
[1:21:49] Argon flow rate set to 0  
[1:21:53] Titrator arm moved over Titration position
