# Supplementary material for: Octanol-water partition coefficient measurements for the SAMPL6 Blind Prediction Challenge
Source: bioRxiv or medRxiv preprint supplement (doi:10.1101/757393), 2019-12-02
Supplement: Supplementary file [file media-2.zip]

Sample name: **M07\_octanol**  
 Assay name: **pH-metric high logP**  
 Assay ID: **18B-28013**  
 Filename: **C:\Sirius\_T3\Mehtap\20180228\_exp28\_logP\_T3-2\18B-28013\_M07\_octanol\_pH-metric high logP.t3r**

Experiment start time: **2/28/2018 7:21:13 PM**  
 Analyst: **Pion**  
 Instrument ID: **T312060**

## pH-metric Result

logP (XH +) 0.31 ±0.04 (n=50)  
 logP (neutral X) 3.21 ±0.01 (n=50)

### 18B-28013 Points 1 to 31

M07\_octanol concentration factor 1.061  
 Carbonate 0.0000 mM  
 Acidity error 0.26960 mM

### 18B-28013 Points 32 to 65

M07\_octanol concentration factor 0.967  
 Carbonate 0.0076 mM  
 Acidity error 0.04628 mM

### 18B-28013 Points 66 to 95

M07\_octanol concentration factor 0.957  
 Carbonate 0.0568 mM  
 Acidity error 0.17006 mM

## Warnings and errors

Errors None  
 Warnings None

## Sample logD and percent species

| pH     | M07_octanol<br>logD | M07_octanol<br>M07_octanolH | M07_octanol<br>M07_octanol | M07_octanol<br>M07_octanolH* | M07_octanol<br>M07_octanol* | Comment    |
|--------|---------------------|-----------------------------|----------------------------|------------------------------|-----------------------------|------------|
| 1.000  | 0.31                | 32.68 %                     | 0.00 %                     | 66.87 %                      | 0.45 %                      | Stomach pH |
| 1.200  | 0.32                | 32.60 %                     | 0.00 %                     | 66.69 %                      | 0.71 %                      |            |
| 2.000  | 0.34                | 31.42 %                     | 0.00 %                     | 64.28 %                      | 4.29 %                      |            |
| 3.000  | 0.53                | 22.66 %                     | 0.02 %                     | 46.35 %                      | 30.97 %                     |            |
| 4.000  | 1.19                | 5.98 %                      | 0.05 %                     | 12.23 %                      | 81.74 %                     |            |
| 5.000  | 2.11                | 0.72 %                      | 0.06 %                     | 1.46 %                       | 97.76 %                     | Blood pH   |
| 6.000  | 2.87                | 0.07 %                      | 0.06 %                     | 0.15 %                       | 99.72 %                     |            |
| 6.500  | 3.07                | 0.02 %                      | 0.06 %                     | 0.05 %                       | 99.87 %                     |            |
| 7.000  | 3.16                | 0.01 %                      | 0.06 %                     | 0.01 %                       | 99.92 %                     |            |
| 7.400  | 3.19                | 0.00 %                      | 0.06 %                     | 0.01 %                       | 99.93 %                     |            |
| 8.000  | 3.20                | 0.00 %                      | 0.06 %                     | 0.00 %                       | 99.94 %                     |            |
| 9.000  | 3.21                | 0.00 %                      | 0.06 %                     | 0.00 %                       | 99.94 %                     |            |
| 10.000 | 3.21                | 0.00 %                      | 0.06 %                     | 0.00 %                       | 99.94 %                     |            |
| 11.000 | 3.21                | 0.00 %                      | 0.06 %                     | 0.00 %                       | 99.94 %                     |            |
| 12.000 | 3.21                | 0.00 %                      | 0.06 %                     | 0.00 %                       | 99.94 %                     |            |

Sample name: **M07\_octanol**  
 Assay name: **pH-metric high logP**  
 Assay ID: **18B-28013**  
 Filename: **C:\Sirius\_T3\Mehtap\20180228\_exp28\_logP\_T3-2\18B-28013\_M07\_octanol\_pH-metric high logP.t3r**

Experiment start time: **2/28/2018 7:21:13 PM**  
 Analyst: **Pion**  
 Instrument ID: **T312060**

## Graphs

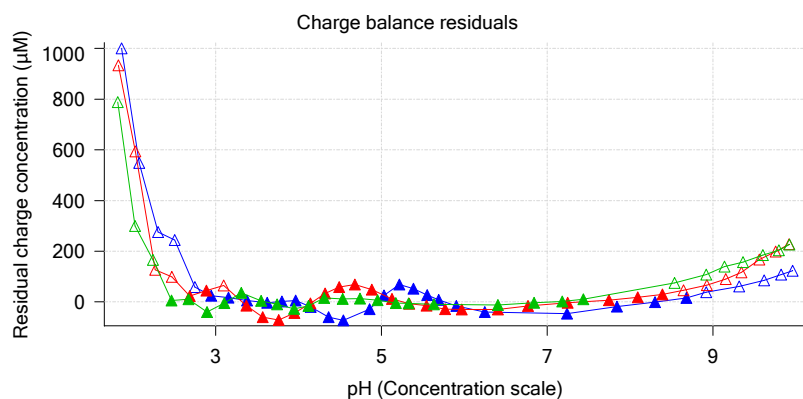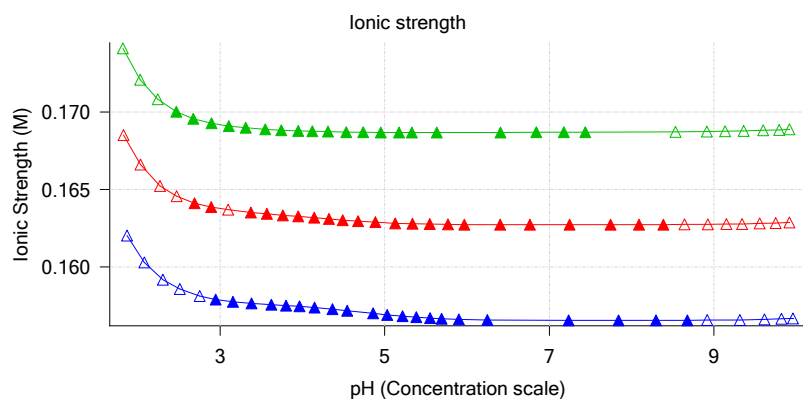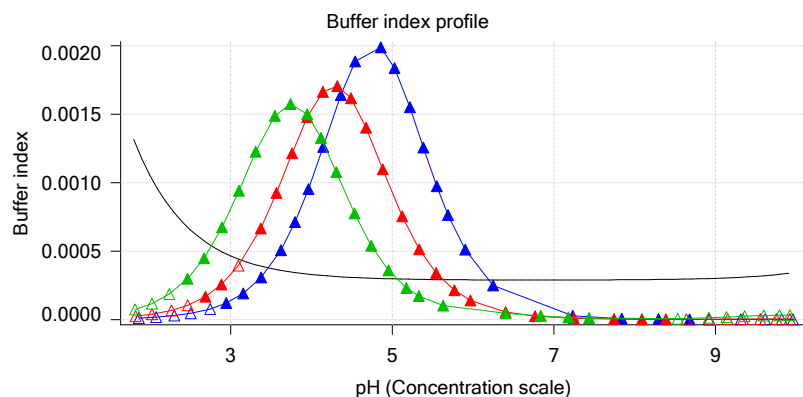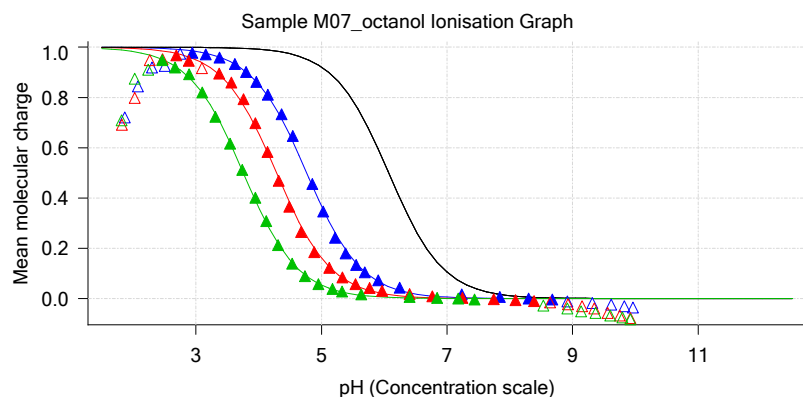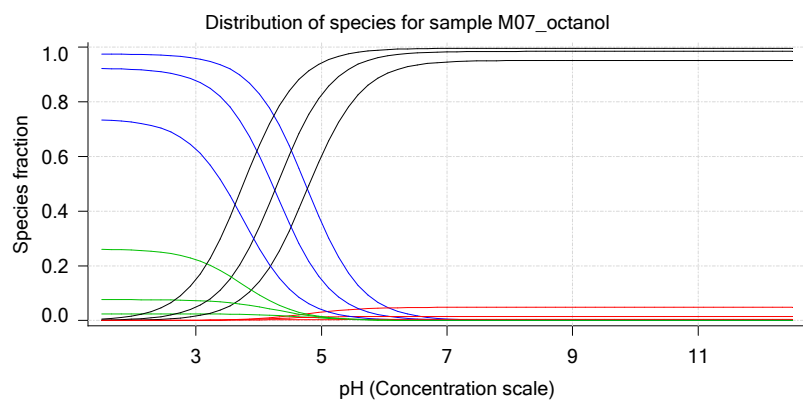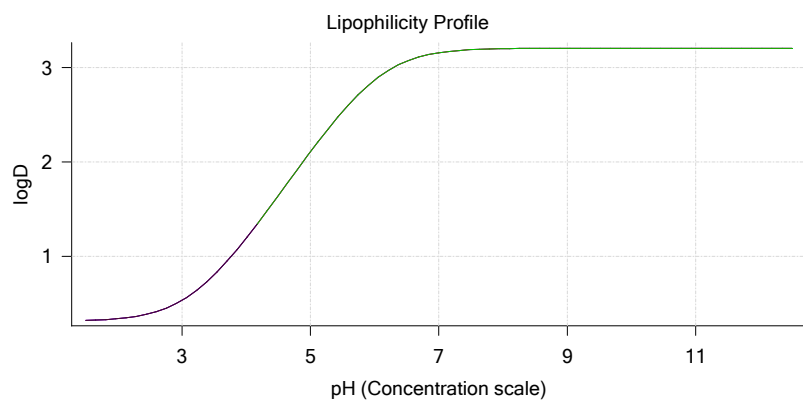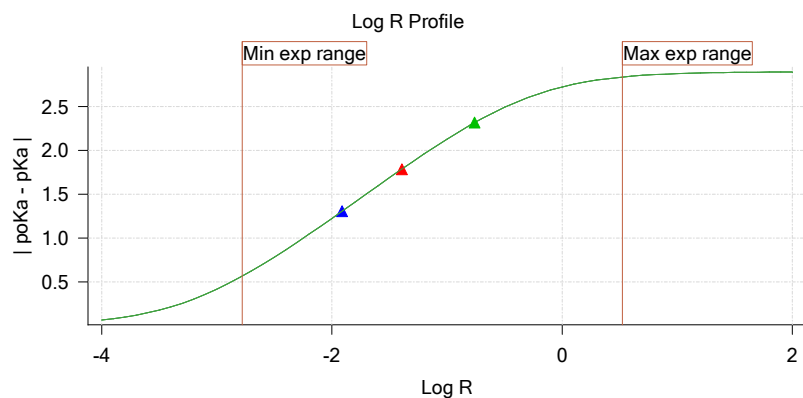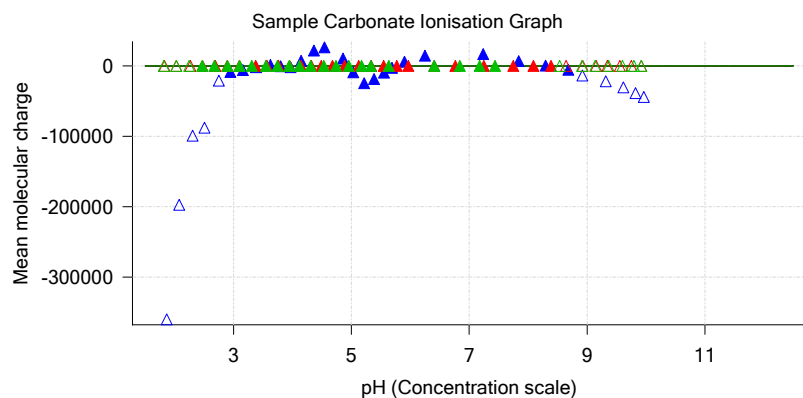

Sample name: **M07\_octanol**  
 Assay name: **pH-metric high logP**  
 Assay ID: **18B-28013**  
 Filename: **C:\Sirius\_T3\Mehtap\20180228\_exp28\_logP\_T3-2\18B-28013\_M07\_octanol\_pH-metric high logP.t3r**

Experiment start time: **2/28/2018 7:21:13 PM**  
 Analyst: **Pion**  
 Instrument ID: **T312060**

## Graphs (continued)

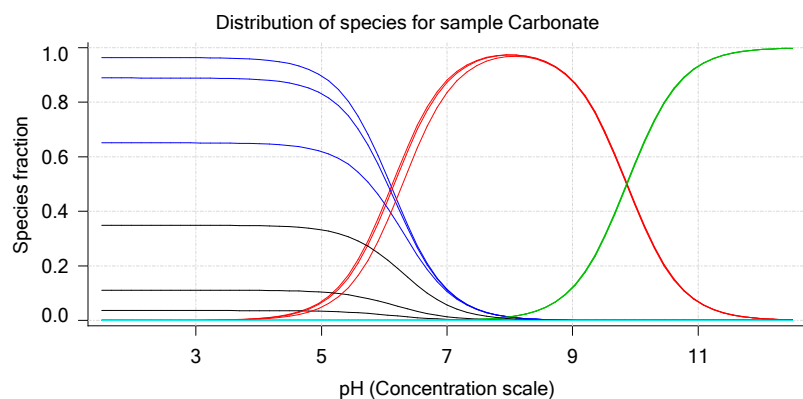

Sample name: **M07\_octanol**  
 Assay name: **pH-metric high logP**  
 Assay ID: **18B-28013**  
 Filename: **C:\Sirius\_T3\Mehtap\20180228\_exp28\_logP\_T3-2\18B-28013\_M07\_octanol\_pH-metric high logP.t3r**

Experiment start time: **2/28/2018 7:21:13 PM**  
 Analyst: **Pion**  
 Instrument ID: **T312060**

## pH-metric high logP Titration 1 of 3 18B-28013 Points 1 to 31

### Overall results

RMSD 0.587  
 Average ionic strength 0.157 M  
 Average temperature 25.0°C  
 Partition ratio 0.0122 : 1  
 Analyte concentration range 3242.7 µM to 3348.4 µM  
 Total points considered 21 of 31

### Warnings and errors

Errors None  
 Warnings None

### Four-Plus parameters

 Alpha 0.130 2/28/2018 7:21:12 PM C:\Sirius\_T3\HCl18B27.t3r  
 S 0.9970 2/28/2018 7:21:12 PM C:\Sirius\_T3\HCl18B27.t3r  
 jH 0.8 2/28/2018 7:21:12 PM C:\Sirius\_T3\HCl18B27.t3r  
 jOH -0.4 2/28/2018 7:21:12 PM C:\Sirius\_T3\HCl18B27.t3r

### Titrants

 0.50 M HCl 0.993513 2/28/2018 7:21:12 PM C:\Sirius\_T3\HCl18B27.t3r  
 0.50 M KOH 0.999845 2/28/2018 7:21:13 PM C:\Sirius\_T3\KOH18B27.t3r

### Sample

 M07\_octanol concentration factor 1.061  
 Base pKa 1 6.07  
 logP (XH +) 0.43  
 logP (neutral X) 3.21

### Sample graphs

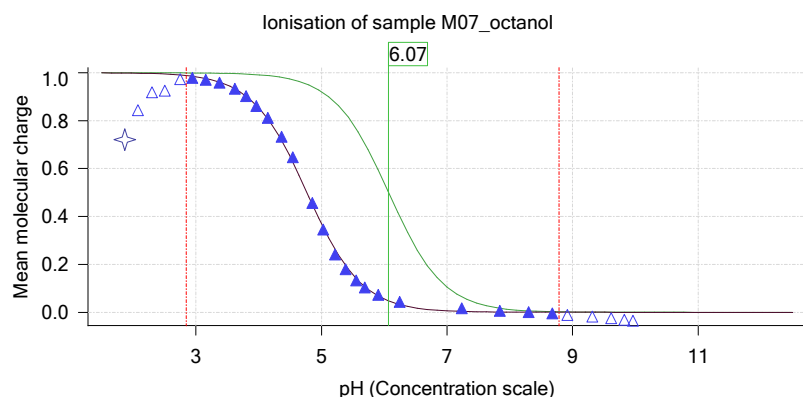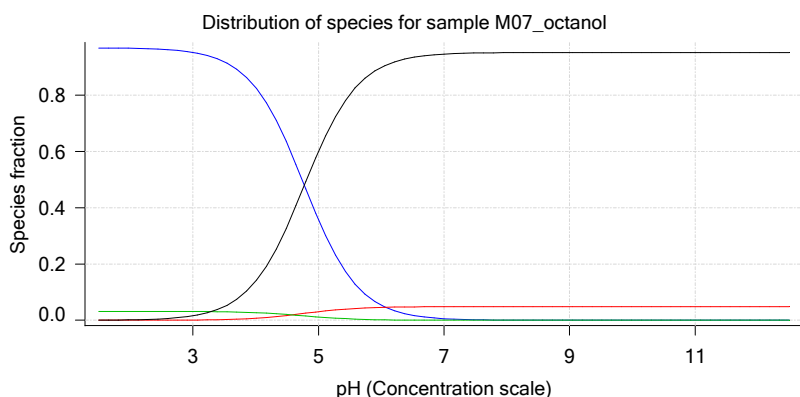

Sample name: **M07\_octanol**  
 Assay name: **pH-metric high logP**  
 Assay ID: **18B-28013**  
 Filename: **C:\Sirius\_T3\Mehtap\20180228\_exp28\_logP\_T3-2\18B-28013\_M07\_octanol\_pH-metric high logP.t3r**

Experiment start time: **2/28/2018 7:21:13 PM**  
 Analyst: **Pion**  
 Instrument ID: **T312060**

## Sample graphs (continued)

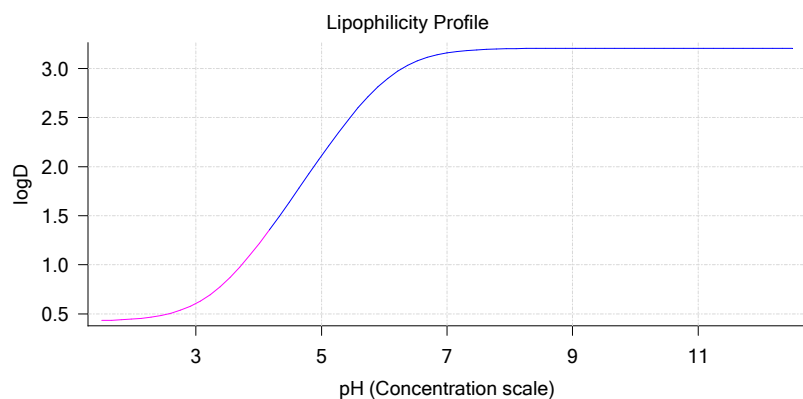

## Sample logD and percent species

| pH     | M07_octanol<br>logD | M07_octanol<br>M07_octanolH | M07_octanol<br>M07_octanolH | M07_octanol<br>M07_octanolH* | M07_octanol<br>M07_octanol* | Comment    |
|--------|---------------------|-----------------------------|-----------------------------|------------------------------|-----------------------------|------------|
| 1.000  | 0.43                | 96.82 %                     | 0.00 %                      | 3.16 %                       | 0.02 %                      | Stomach pH |
| 1.200  | 0.43                | 96.81 %                     | 0.00 %                      | 3.16 %                       | 0.03 %                      |            |
| 2.000  | 0.45                | 96.67 %                     | 0.01 %                      | 3.16 %                       | 0.16 %                      |            |
| 3.000  | 0.61                | 95.22 %                     | 0.08 %                      | 3.11 %                       | 1.59 %                      |            |
| 4.000  | 1.21                | 82.74 %                     | 0.70 %                      | 2.70 %                       | 13.85 %                     |            |
| 5.000  | 2.11                | 35.82 %                     | 3.05 %                      | 1.17 %                       | 59.96 %                     | Blood pH   |
| 6.000  | 2.87                | 5.37 %                      | 4.57 %                      | 0.18 %                       | 89.88 %                     |            |
| 6.500  | 3.07                | 1.77 %                      | 4.75 %                      | 0.06 %                       | 93.43 %                     |            |
| 7.000  | 3.16                | 0.57 %                      | 4.81 %                      | 0.02 %                       | 94.61 %                     |            |
| 7.400  | 3.19                | 0.23 %                      | 4.83 %                      | 0.01 %                       | 94.94 %                     |            |
| 8.000  | 3.20                | 0.06 %                      | 4.84 %                      | 0.00 %                       | 95.11 %                     |            |
| 9.000  | 3.21                | 0.01 %                      | 4.84 %                      | 0.00 %                       | 95.16 %                     |            |
| 10.000 | 3.21                | 0.00 %                      | 4.84 %                      | 0.00 %                       | 95.16 %                     |            |
| 11.000 | 3.21                | 0.00 %                      | 4.84 %                      | 0.00 %                       | 95.16 %                     |            |
| 12.000 | 3.21                | 0.00 %                      | 4.84 %                      | 0.00 %                       | 95.16 %                     |            |

## Carbonate and acidity

 Carbonate 0.000 mM  
 Acidity error 0.270 mM

## Other graphs

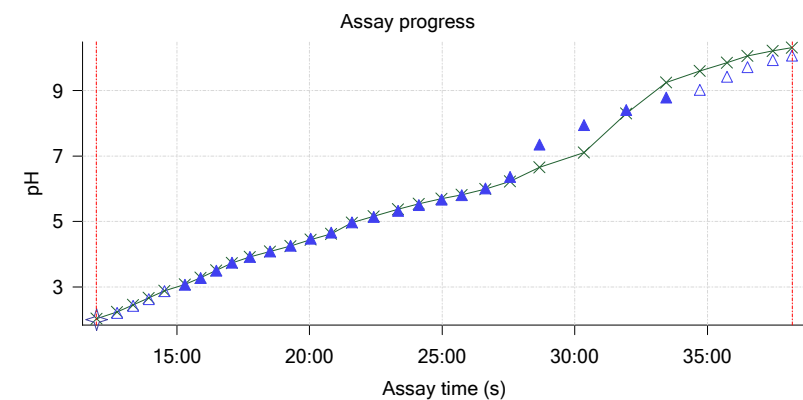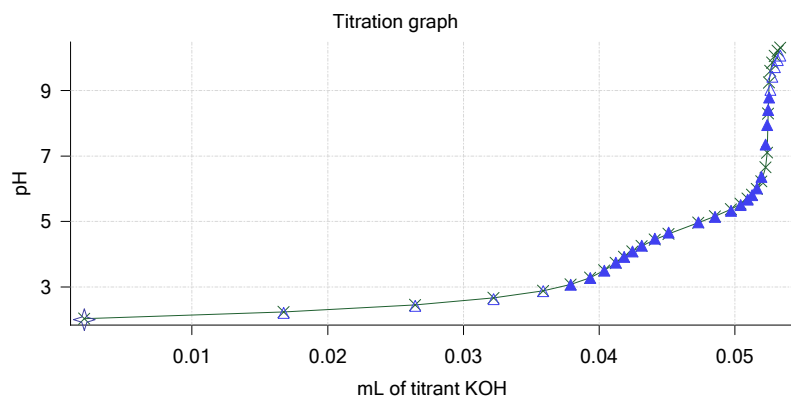

Sample name: **M07\_octanol**  
 Assay name: **pH-metric high logP**  
 Assay ID: **18B-28013**  
 Filename: **C:\Sirius\_T3\Mehtap\20180228\_exp28\_logP\_T3-2\18B-28013\_M07\_octanol\_pH-metric high logP.t3r**

Experiment start time: **2/28/2018 7:21:13 PM**  
 Analyst: **Pion**  
 Instrument ID: **T312060**

## Other graphs (continued)

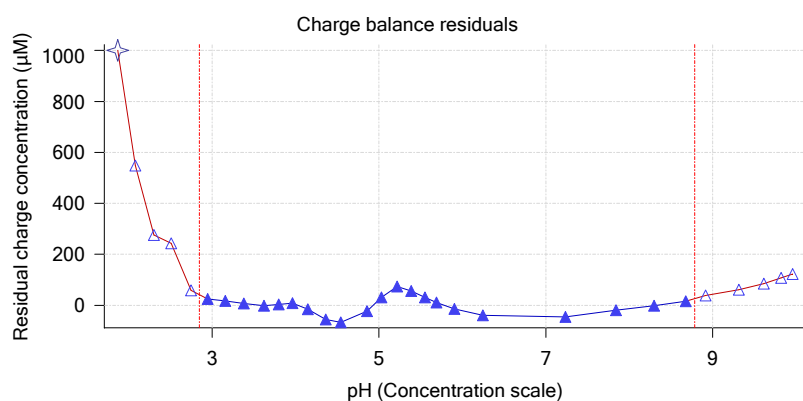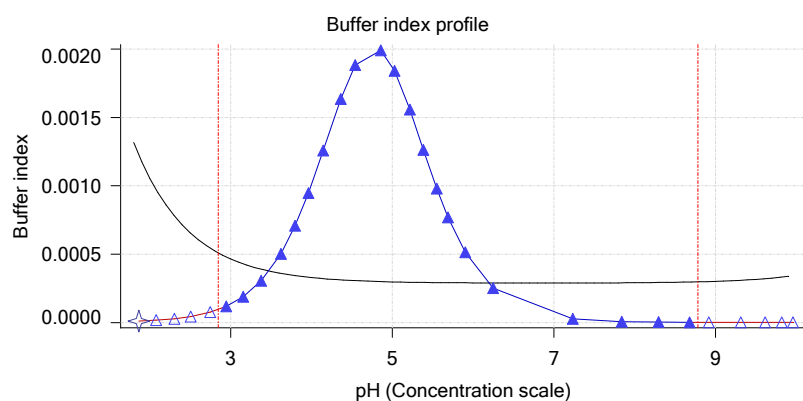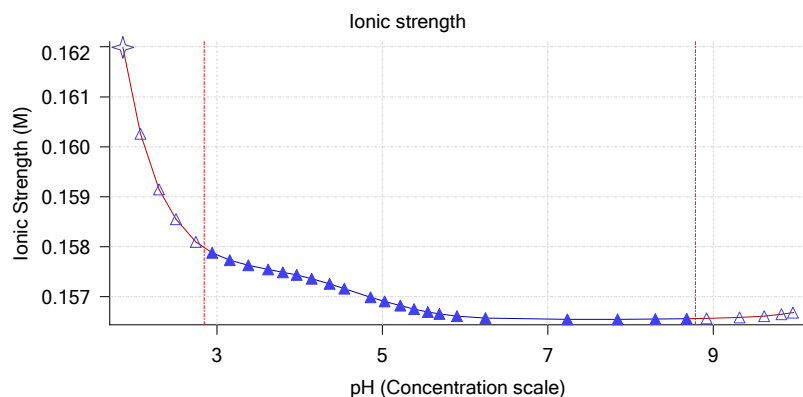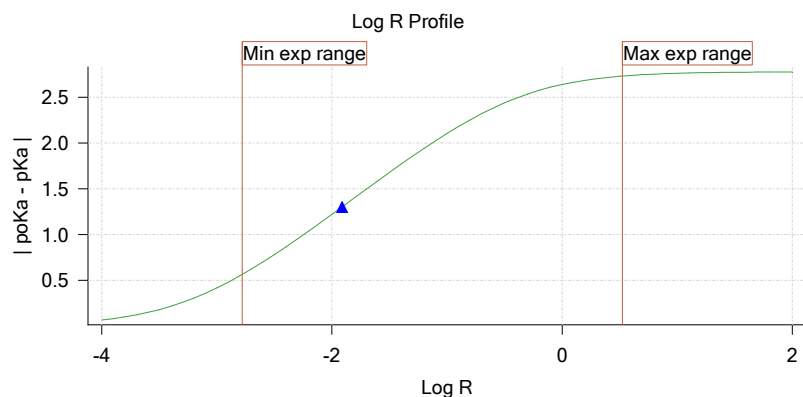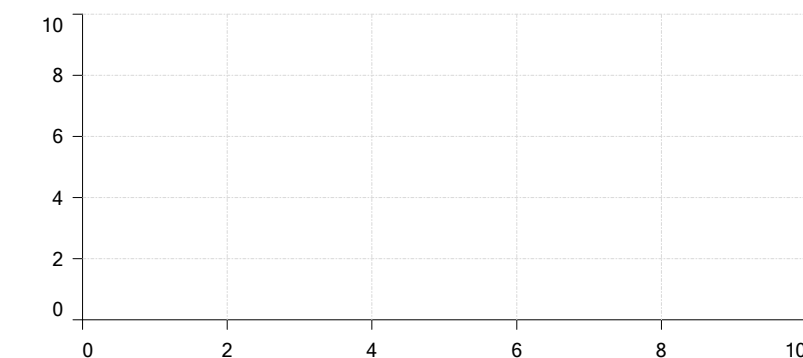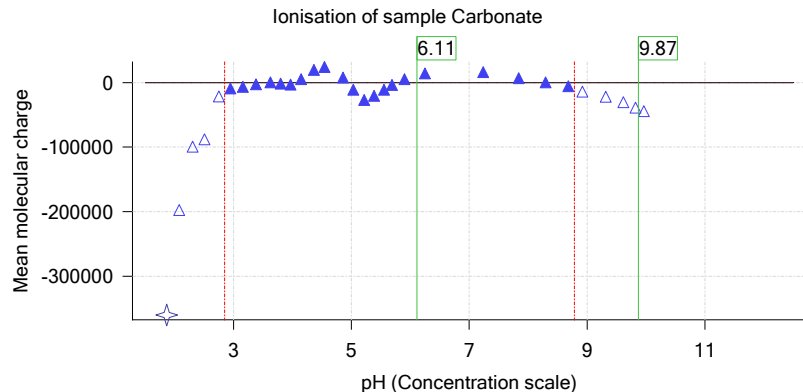

Sample name: **M07\_octanol**  
 Assay name: **pH-metric high logP**  
 Assay ID: **18B-28013**  
 Filename: **C:\Sirius\_T3\Mehtap\20180228\_exp28\_logP\_T3-2\18B-28013\_M07\_octanol\_pH-metric high logP.t3r**

Experiment start time: **2/28/2018 7:21:13 PM**  
 Analyst: **Pion**  
 Instrument ID: **T312060**

pH-metric high logP Titration 2 of 3 18B-28013 Points 32 to 65

## Overall results

RMSD 0.919  
 Average ionic strength 0.163 M  
 Average temperature 25.0°C  
 Partition ratio 0.0405 : 1  
 Analyte concentration range 2940.2 µM to 3039.0 µM  
 Total points considered 22 of 34

## Warnings and errors

Errors None  
 Warnings None

## Four-Plus parameters

Alpha 0.130 2/28/2018 7:21:12 PM C:\Sirius\_T3\HCl18B27.t3r  
 S 0.9970 2/28/2018 7:21:12 PM C:\Sirius\_T3\HCl18B27.t3r  
 jH 0.8 2/28/2018 7:21:12 PM C:\Sirius\_T3\HCl18B27.t3r  
 jOH -0.4 2/28/2018 7:21:12 PM C:\Sirius\_T3\HCl18B27.t3r

## Titrants

0.50 M HCl 0.993513 2/28/2018 7:21:12 PM C:\Sirius\_T3\HCl18B27.t3r  
 0.50 M KOH 0.999845 2/28/2018 7:21:13 PM C:\Sirius\_T3\KOH18B27.t3r

## Sample

M07\_octanol concentration factor 0.967  
 Base pKa 1 6.07  
 logP (XH +) 0.52  
 logP (neutral X) 3.23

## Sample graphs

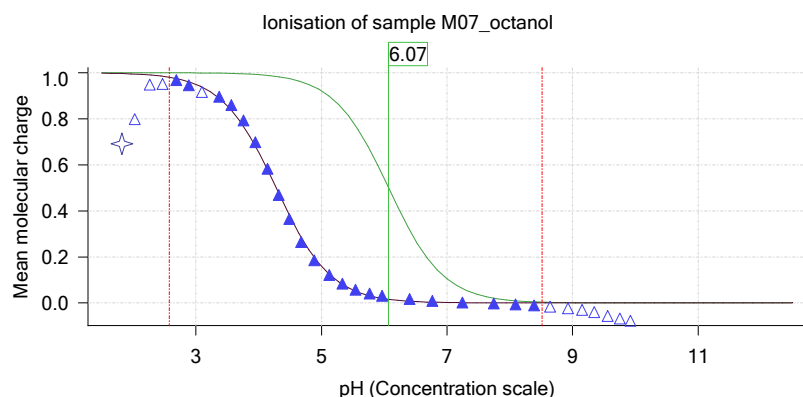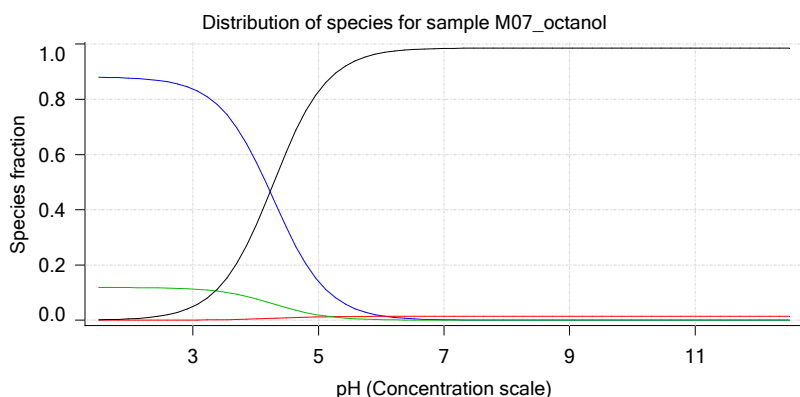

Sample name: **M07\_octanol**  
 Assay name: **pH-metric high logP**  
 Assay ID: **18B-28013**  
 Filename: **C:\Sirius\_T3\Mehtap\20180228\_exp28\_logP\_T3-2\18B-28013\_M07\_octanol\_pH-metric high logP.t3r**

Experiment start time: **2/28/2018 7:21:13 PM**  
 Analyst: **Pion**  
 Instrument ID: **T312060**

## Sample graphs (continued)

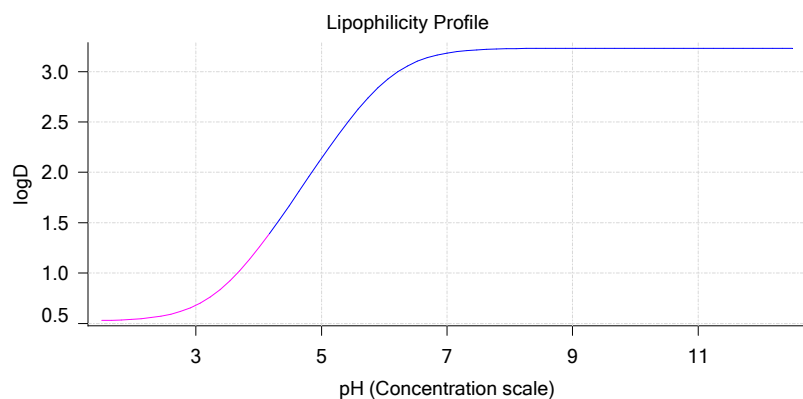

## Sample logD and percent species

| pH     | M07_octanol<br>logD | M07_octanol<br>M07_octanolH | M07_octanol<br>M07_octanolH | M07_octanol<br>M07_octanolH* | M07_octanol<br>M07_octanol* | Comment    |
|--------|---------------------|-----------------------------|-----------------------------|------------------------------|-----------------------------|------------|
| 1.000  | 0.52                | 88.06 %                     | 0.00 %                      | 11.88 %                      | 0.05 %                      | Stomach pH |
| 1.200  | 0.53                | 88.04 %                     | 0.00 %                      | 11.88 %                      | 0.08 %                      |            |
| 2.000  | 0.54                | 87.65 %                     | 0.01 %                      | 11.83 %                      | 0.52 %                      |            |
| 3.000  | 0.68                | 83.70 %                     | 0.07 %                      | 11.30 %                      | 4.93 %                      |            |
| 4.000  | 1.25                | 57.73 %                     | 0.49 %                      | 7.79 %                       | 33.99 %                     |            |
| 5.000  | 2.14                | 14.07 %                     | 1.20 %                      | 1.90 %                       | 82.84 %                     | Blood pH   |
| 6.000  | 2.90                | 1.64 %                      | 1.40 %                      | 0.22 %                       | 96.74 %                     |            |
| 6.500  | 3.10                | 0.53 %                      | 1.42 %                      | 0.07 %                       | 97.99 %                     |            |
| 7.000  | 3.18                | 0.17 %                      | 1.42 %                      | 0.02 %                       | 98.39 %                     |            |
| 7.400  | 3.21                | 0.07 %                      | 1.42 %                      | 0.01 %                       | 98.50 %                     |            |
| 8.000  | 3.23                | 0.02 %                      | 1.42 %                      | 0.00 %                       | 98.56 %                     |            |
| 9.000  | 3.23                | 0.00 %                      | 1.42 %                      | 0.00 %                       | 98.57 %                     |            |
| 10.000 | 3.23                | 0.00 %                      | 1.42 %                      | 0.00 %                       | 98.57 %                     |            |
| 11.000 | 3.23                | 0.00 %                      | 1.42 %                      | 0.00 %                       | 98.58 %                     |            |
| 12.000 | 3.23                | 0.00 %                      | 1.42 %                      | 0.00 %                       | 98.58 %                     |            |

## Carbonate and acidity

 Carbonate 0.008 mM  
 Acidity error 0.046 mM

## Other graphs

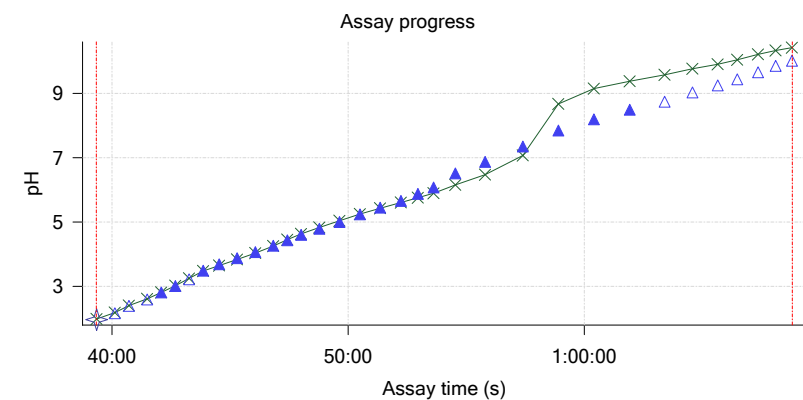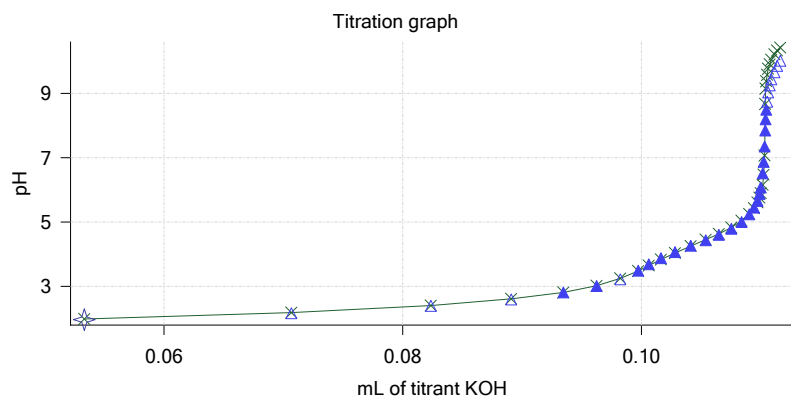



Sample name: **M07\_octanol**  
 Assay name: **pH-metric high logP**  
 Assay ID: **18B-28013**  
 Filename: **C:\Sirius\_T3\Mehtap\20180228\_exp28\_logP\_T3-2\18B-28013\_M07\_octanol\_pH-metric high logP.t3r**

Experiment start time: **2/28/2018 7:21:13 PM**  
 Analyst: **Pion**  
 Instrument ID: **T312060**

## Other graphs (continued)

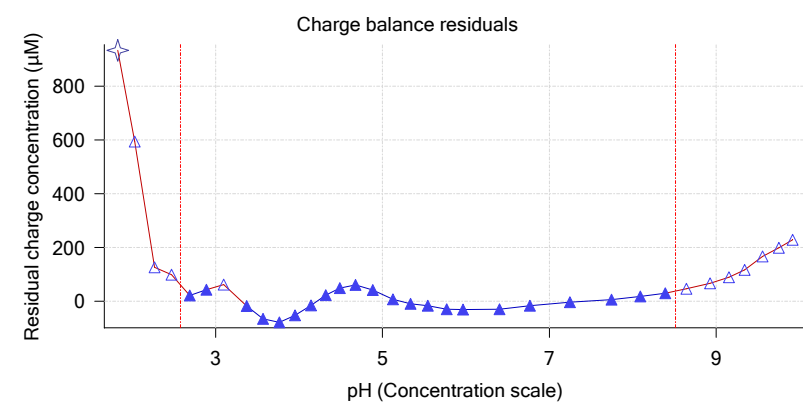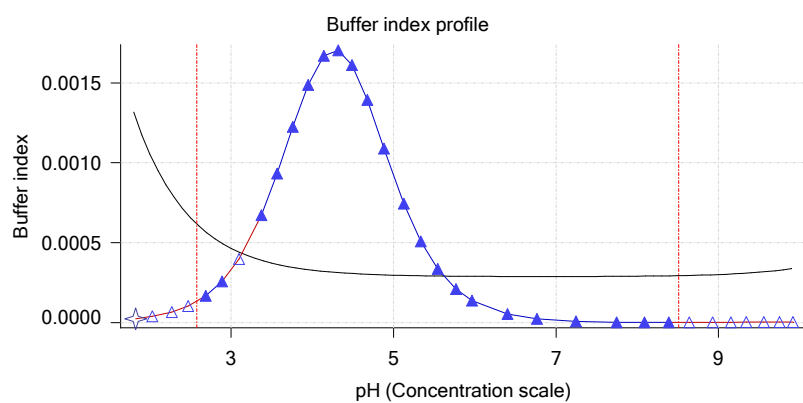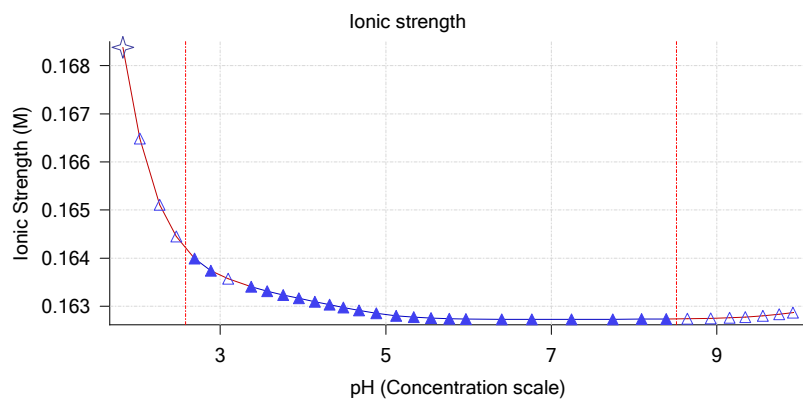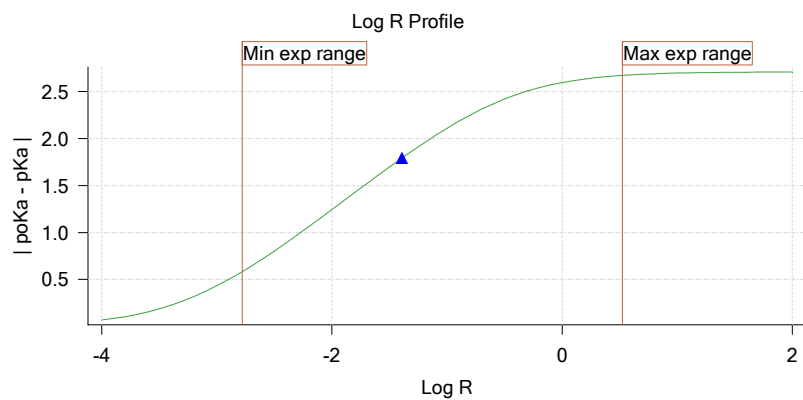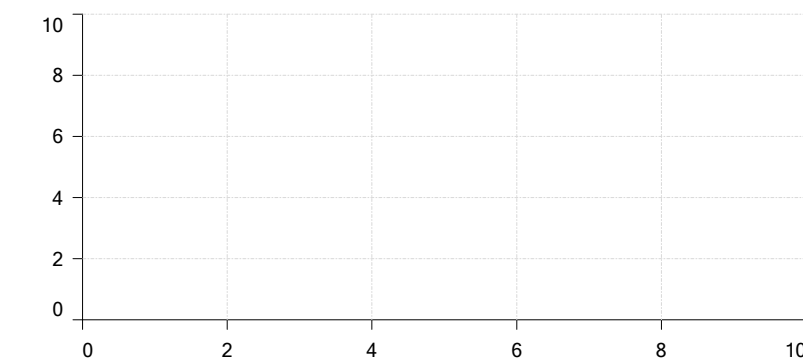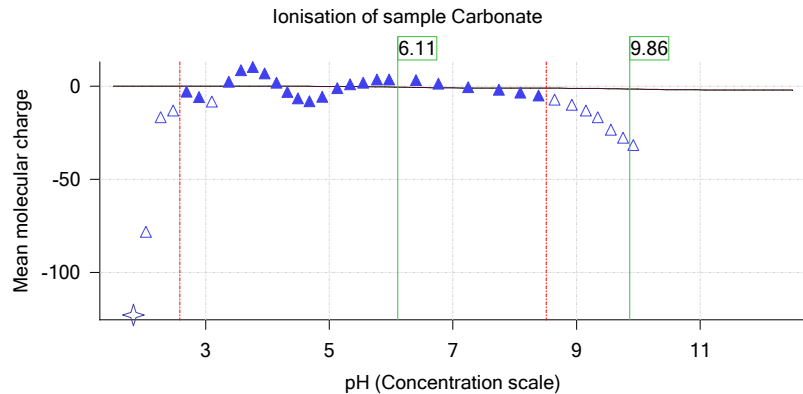

Sample name: **M07\_octanol**  
 Assay name: **pH-metric high logP**  
 Assay ID: **18B-28013**  
 Filename: **C:\Sirius\_T3\Mehtap\20180228\_exp28\_logP\_T3-2\18B-28013\_M07\_octanol\_pH-metric high logP.t3r**

Experiment start time: **2/28/2018 7:21:13 PM**  
 Analyst: **Pion**  
 Instrument ID: **T312060**

pH-metric high logP Titration 3 of 3 18B-28013 Points 66 to 95

## Overall results

RMSD 0.230  
 Average ionic strength 0.169 M  
 Average temperature 25.0°C  
 Partition ratio 0.1734 : 1  
 Analyte concentration range 2430.3 µM to 2503.3 µM  
 Total points considered 20 of 30

## Warnings and errors

Errors None  
 Warnings None

## Four-Plus parameters

Alpha 0.130 2/28/2018 7:21:12 PM C:\Sirius\_T3\HCl18B27.t3r  
 S 0.9970 2/28/2018 7:21:12 PM C:\Sirius\_T3\HCl18B27.t3r  
 jH 0.8 2/28/2018 7:21:12 PM C:\Sirius\_T3\HCl18B27.t3r  
 jOH -0.4 2/28/2018 7:21:12 PM C:\Sirius\_T3\HCl18B27.t3r

## Titrants

0.50 M HCl 0.993513 2/28/2018 7:21:12 PM C:\Sirius\_T3\HCl18B27.t3r  
 0.50 M KOH 0.999845 2/28/2018 7:21:13 PM C:\Sirius\_T3\KOH18B27.t3r

## Sample

M07\_octanol concentration factor 0.957  
 Base pKa 1 6.07  
 logP (XH +) 0.49  
 logP (neutral X) 3.26

## Sample graphs

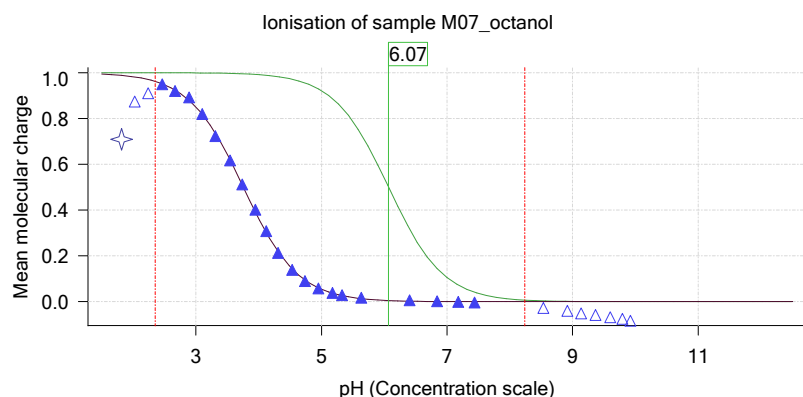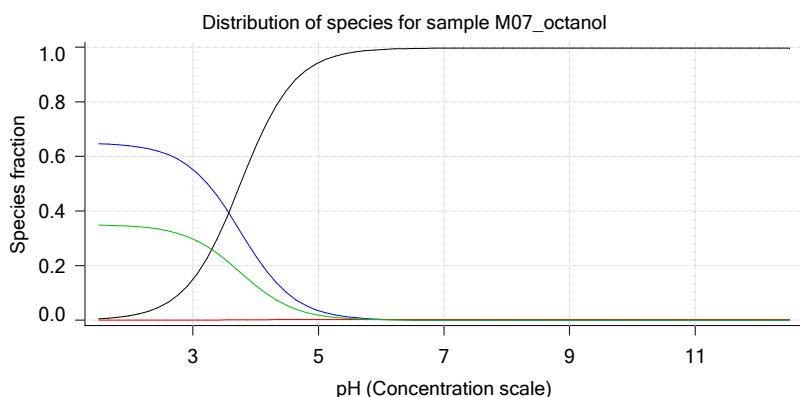

Sample name: **M07\_octanol**  
Assay name: **pH-metric high logP**  
Assay ID: **18B-28013**  
Filename: **C:\Sirius\_T3\Mehtap\20180228\_exp28\_logP\_T3-2\18B-28013\_M07\_octanol\_pH-metric high logP.t3r**

Experiment start time: **2/28/2018 7:21:13 PM**  
Analyst: **Pion**  
Instrument ID: **T312060**

## Sample graphs (continued)

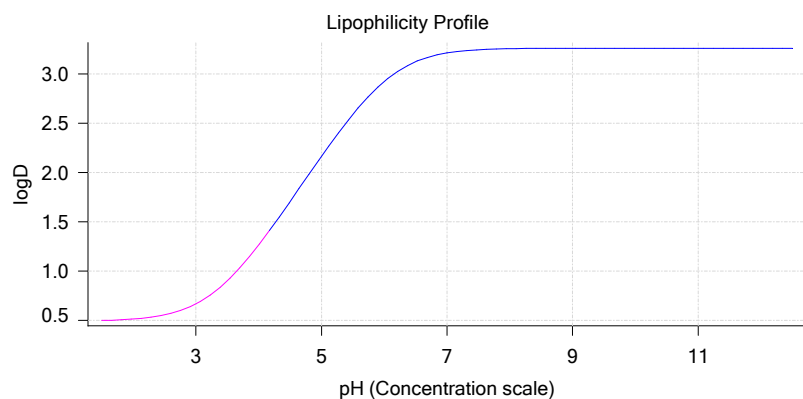

## Sample logD and percent species

| pH     | M07_octanol<br>logD | M07_octanol<br>M07_octanolH | M07_octanol<br>M07_octanolH | M07_octanol<br>M07_octanolH* | M07_octanol<br>M07_octanol* | Comment    |
|--------|---------------------|-----------------------------|-----------------------------|------------------------------|-----------------------------|------------|
| 1.000  | 0.49                | 64.86 %                     | 0.00 %                      | 34.97 %                      | 0.17 %                      | Stomach pH |
| 1.200  | 0.50                | 64.79 %                     | 0.00 %                      | 34.93 %                      | 0.28 %                      |            |
| 2.000  | 0.51                | 63.85 %                     | 0.01 %                      | 34.43 %                      | 1.72 %                      |            |
| 3.000  | 0.67                | 55.29 %                     | 0.05 %                      | 29.81 %                      | 14.85 %                     |            |
| 4.000  | 1.27                | 23.62 %                     | 0.20 %                      | 12.73 %                      | 63.45 %                     |            |
| 5.000  | 2.16                | 3.51 %                      | 0.30 %                      | 1.89 %                       | 94.30 %                     | Blood pH   |
| 6.000  | 2.92                | 0.37 %                      | 0.31 %                      | 0.20 %                       | 99.12 %                     |            |
| 6.500  | 3.12                | 0.12 %                      | 0.32 %                      | 0.06 %                       | 99.50 %                     |            |
| 7.000  | 3.21                | 0.04 %                      | 0.32 %                      | 0.02 %                       | 99.63 %                     |            |
| 7.400  | 3.24                | 0.01 %                      | 0.32 %                      | 0.01 %                       | 99.66 %                     |            |
| 8.000  | 3.25                | 0.00 %                      | 0.32 %                      | 0.00 %                       | 99.68 %                     |            |
| 9.000  | 3.26                | 0.00 %                      | 0.32 %                      | 0.00 %                       | 99.68 %                     |            |
| 10.000 | 3.26                | 0.00 %                      | 0.32 %                      | 0.00 %                       | 99.68 %                     |            |
| 11.000 | 3.26                | 0.00 %                      | 0.32 %                      | 0.00 %                       | 99.68 %                     |            |
| 12.000 | 3.26                | 0.00 %                      | 0.32 %                      | 0.00 %                       | 99.68 %                     |            |

## Carbonate and acidity

Carbonate 0.057 mM  
Acidity error 0.170 mM

## Other graphs

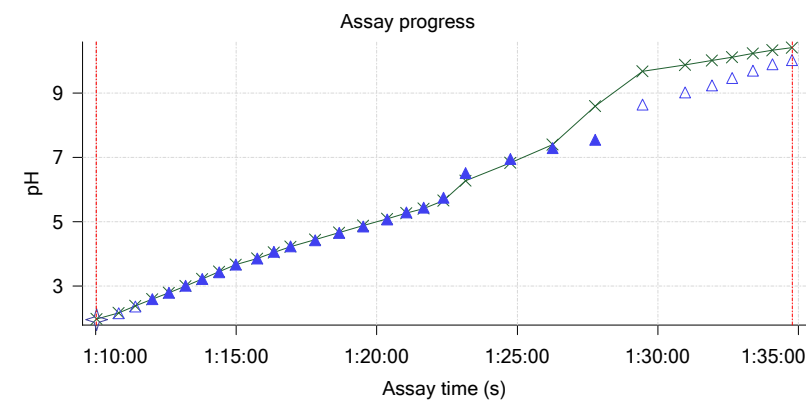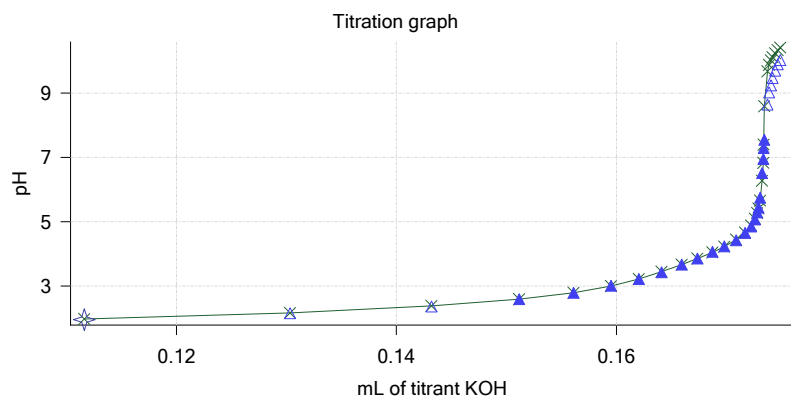

Sample name: **M07\_octanol**  
 Assay name: **pH-metric high logP**  
 Assay ID: **18B-28013**  
 Filename: **C:\Sirius\_T3\Mehtap\20180228\_exp28\_logP\_T3-2\18B-28013\_M07\_octanol\_pH-metric high logP.t3r**

Experiment start time: **2/28/2018 7:21:13 PM**  
 Analyst: **Pion**  
 Instrument ID: **T312060**

## Other graphs (continued)

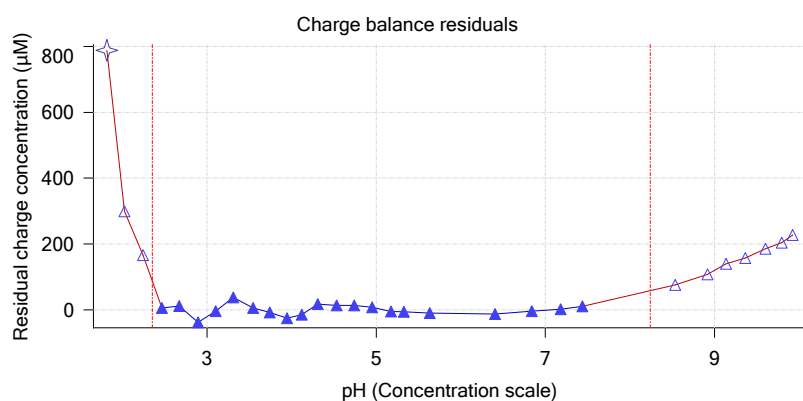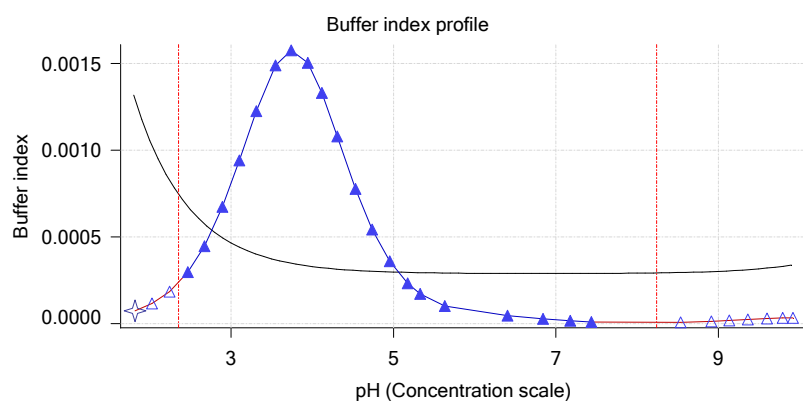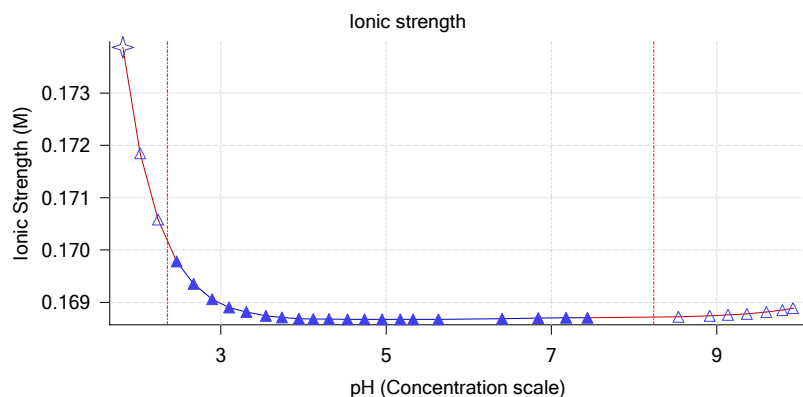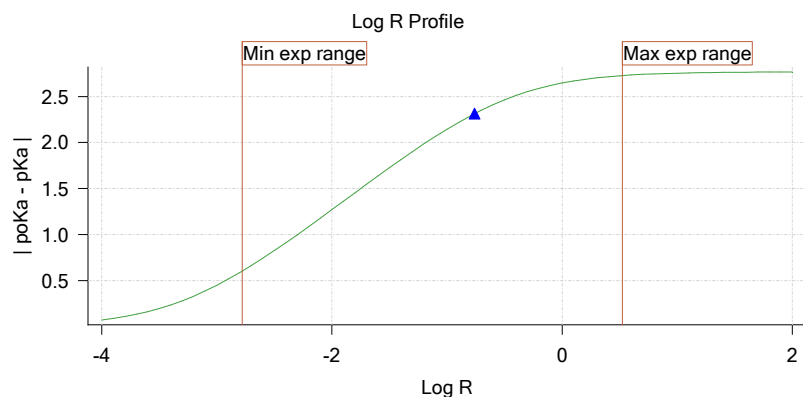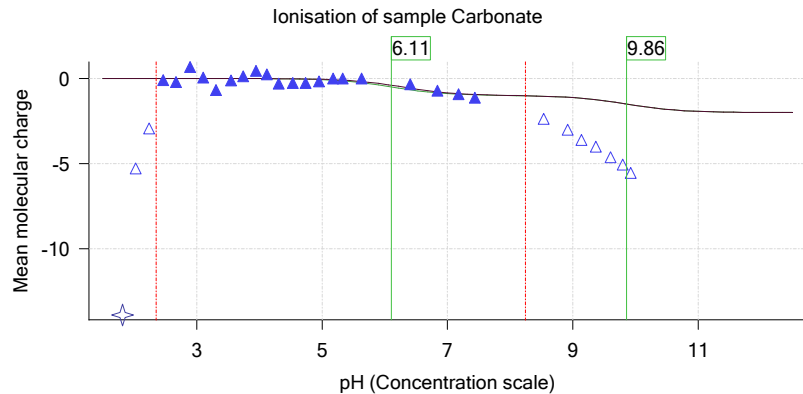

Sample name: **M07\_octanol** Experiment start time: **2/28/2018 7:21:13 PM**  
 Assay name: **pH-metric high logP** Analyst: **Pion**  
 Assay ID: **18B-28013** Instrument ID: **T312060**  
 Filename: **C:\Sirius\_T3\Mehtap\20180228\_exp28\_logP\_T3-2\18B-28013\_M07\_octanol\_pH-metric high logP.t3r**

## Assay Model

| Settings                          | Value        | Date/Time changed    | Imported from      |
|-----------------------------------|--------------|----------------------|--------------------|
| Sample name                       | M07_octanol  | 2/27/2018 4:29:24 PM | User entered value |
| Sample by                         | Weight       |                      | Default value      |
| Sample weight                     | 0.001240 g   | 2/28/2018 4:24:19 PM | User entered value |
| Formula weight                    | 235.28 g/mol | 2/27/2018 4:29:24 PM | User entered value |
| Solubility                        | Unknown      |                      | Default value      |
| Molecular weight                  | 235.28       | 2/27/2018 4:29:24 PM | User entered value |
| Individual pKa ionic environments | No           |                      | Default value      |
| Number of pKas                    | 1            | 2/27/2018 4:29:24 PM | User entered value |
| Sample is a                       | Base         | 2/27/2018 4:29:24 PM | User entered value |
| pKa 1                             | 6.07         | 2/27/2018 4:29:24 PM | User entered value |
| logp (XH +)                       | 0.50         | 2/28/2018 1:33:04 PM | User entered value |
| logP (neutral X)                  | 3.44         | 2/28/2018 1:33:10 PM | User entered value |

## Events

| Time    | Event             | Water      | Acid       | Base       | Octanol    | pH     | dpH/dt   | pH R-squared | pH SD   | dpH/dt time         |
|---------|-------------------|------------|------------|------------|------------|--------|----------|--------------|---------|---------------------|
| 8:59.2  | Initial pH = 6.72 |            |            |            |            |        |          |              |         |                     |
| 11:58.8 | Data point 1      | 1.50000 mL | 0.05191 mL | 0.00207 mL | 0.01999 mL | 2.001  | 0.00132  | 0.04152      | 0.00032 | 10.0 s              |
| 12:44.9 | Data point 2      | 1.50000 mL | 0.05191 mL | 0.01675 mL | 0.01999 mL | 2.208  | -0.01261 | 0.85529      | 0.00067 | 10.5 s              |
| 13:21.1 | Data point 3      | 1.50000 mL | 0.05191 mL | 0.02643 mL | 0.01999 mL | 2.430  | -0.01070 | 0.78000      | 0.00060 | 10.0 s              |
| 13:56.6 | Data point 4      | 1.50000 mL | 0.05191 mL | 0.03222 mL | 0.01999 mL | 2.632  | -0.00370 | 0.50717      | 0.00026 | 10.0 s              |
| 14:32.2 | Data point 5      | 1.50000 mL | 0.05191 mL | 0.03587 mL | 0.01999 mL | 2.871  | -0.00475 | 0.47439      | 0.00034 | 10.0 s              |
| 15:18.0 | Data point 6      | 1.50000 mL | 0.05191 mL | 0.03789 mL | 0.01999 mL | 3.068  | -0.00916 | 0.24962      | 0.00091 | 10.0 s              |
| 15:53.4 | Data point 7      | 1.50000 mL | 0.05191 mL | 0.03935 mL | 0.01999 mL | 3.277  | -0.00524 | 0.87796      | 0.00028 | 10.5 s              |
| 16:29.4 | Data point 8      | 1.50000 mL | 0.05191 mL | 0.04038 mL | 0.01999 mL | 3.499  | -0.00471 | 0.65043      | 0.00029 | 10.0 s              |
| 17:04.8 | Data point 9      | 1.50000 mL | 0.05191 mL | 0.04123 mL | 0.01999 mL | 3.741  | -0.00484 | 0.50306      | 0.00034 | 10.0 s              |
| 17:45.4 | Data point 10     | 1.50000 mL | 0.05191 mL | 0.04184 mL | 0.01999 mL | 3.917  | -0.00416 | 0.61481      | 0.00026 | 10.0 s              |
| 18:31.2 | Data point 11     | 1.50000 mL | 0.05191 mL | 0.04245 mL | 0.01999 mL | 4.082  | -0.00448 | 0.70035      | 0.00026 | 10.0 s              |
| 19:16.9 | Data point 12     | 1.50000 mL | 0.05191 mL | 0.04313 mL | 0.01999 mL | 4.264  | -0.01077 | 0.67467      | 0.00065 | 10.0 s              |
| 20:02.6 | Data point 13     | 1.50000 mL | 0.05191 mL | 0.04410 mL | 0.01999 mL | 4.480  | -0.01584 | 0.85617      | 0.00085 | 10.5 s              |
| 20:48.8 | Data point 14     | 1.50000 mL | 0.05191 mL | 0.04511 mL | 0.01999 mL | 4.658  | -0.01680 | 0.77140      | 0.00095 | 11.5 s              |
| 21:36.2 | Data point 15     | 1.50000 mL | 0.05191 mL | 0.04730 mL | 0.01999 mL | 4.972  | -0.01791 | 0.88784      | 0.00094 | 13.5 s              |
| 22:25.5 | Data point 16     | 1.50000 mL | 0.05191 mL | 0.04854 mL | 0.01999 mL | 5.144  | -0.01931 | 0.92268      | 0.00099 | 14.0 s              |
| 23:20.4 | Data point 17     | 1.50000 mL | 0.05191 mL | 0.04972 mL | 0.01999 mL | 5.332  | -0.01736 | 0.89270      | 0.00091 | 16.5 s              |
| 24:07.7 | Data point 18     | 1.50000 mL | 0.05191 mL | 0.05042 mL | 0.01999 mL | 5.498  | -0.01945 | 0.93126      | 0.00100 | 20.5 s              |
| 24:58.7 | Data point 19     | 1.50000 mL | 0.05191 mL | 0.05094 mL | 0.01999 mL | 5.664  | -0.01909 | 0.92243      | 0.00098 | 20.5 s              |
| 25:44.7 | Data point 20     | 1.50000 mL | 0.05191 mL | 0.05127 mL | 0.01999 mL | 5.804  | -0.01742 | 0.80585      | 0.00096 | 23.0 s              |
| 26:38.3 | Data point 21     | 1.50000 mL | 0.05191 mL | 0.05162 mL | 0.01999 mL | 6.014  | -0.01944 | 0.96457      | 0.00098 | 24.5 s              |
| 27:33.3 | Data point 22     | 1.50000 mL | 0.05191 mL | 0.05195 mL | 0.01999 mL | 6.358  | -0.01926 | 0.90710      | 0.00100 | 36.0 s              |
| 28:39.9 | Data point 23     | 1.50000 mL | 0.05191 mL | 0.05226 mL | 0.01999 mL | 7.345  | -0.04577 | 0.99604      | 0.00226 | Timed out at 59.5 s |
| 30:20.7 | Data point 24     | 1.50000 mL | 0.05191 mL | 0.05238 mL | 0.01999 mL | 7.948  | -0.04715 | 0.98406      | 0.00235 | Timed out at 59.5 s |
| 31:56.4 | Data point 25     | 1.50000 mL | 0.05191 mL | 0.05245 mL | 0.01999 mL | 8.403  | -0.03639 | 0.99199      | 0.00180 | Timed out at 59.5 s |
| 33:26.9 | Data point 26     | 1.50000 mL | 0.05191 mL | 0.05252 mL | 0.01999 mL | 8.783  | -0.01951 | 0.93124      | 0.00100 | 45.5 s              |
| 34:42.9 | Data point 27     | 1.50000 mL | 0.05191 mL | 0.05261 mL | 0.01999 mL | 9.021  | -0.01783 | 0.95357      | 0.00090 | 31.0 s              |
| 35:44.5 | Data point 28     | 1.50000 mL | 0.05191 mL | 0.05275 mL | 0.01999 mL | 9.417  | -0.01646 | 0.77635      | 0.00092 | 15.5 s              |
| 36:30.7 | Data point 29     | 1.50000 mL | 0.05191 mL | 0.05294 mL | 0.01999 mL | 9.717  | -0.01888 | 0.92426      | 0.00097 | 21.5 s              |
| 37:28.0 | Data point 30     | 1.50000 mL | 0.05191 mL | 0.05315 mL | 0.01999 mL | 9.923  | -0.01891 | 0.96558      | 0.00095 | 12.5 s              |
| 38:11.1 | Data point 31     | 1.50000 mL | 0.05191 mL | 0.05334 mL | 0.01999 mL | 10.061 | -0.01803 | 0.97803      | 0.00090 | 10.5 s              |
| 39:21.0 | Data point 32     | 1.50000 mL | 0.11084 mL | 0.05334 mL | 0.06999 mL | 1.960  | -0.00708 | 0.60704      | 0.00045 | 10.0 s              |
| 40:07.3 | Data point 33     | 1.50000 mL | 0.11084 mL | 0.07067 mL | 0.06999 mL | 2.160  | -0.01155 | 0.76739      | 0.00065 | 10.0 s              |
| 40:43.0 | Data point 34     | 1.50000 mL | 0.11084 mL | 0.08236 mL | 0.06999 mL | 2.395  | -0.00810 | 0.72844      | 0.00047 | 10.5 s              |
| 41:29.5 | Data point 35     | 1.50000 mL | 0.11084 mL | 0.08909 mL | 0.06999 mL | 2.596  | -0.00385 | 0.58762      | 0.00025 | 10.0 s              |
| 42:05.0 | Data point 36     | 1.50000 mL | 0.11084 mL | 0.09344 mL | 0.06999 mL | 2.811  | -0.00364 | 0.09675      | 0.00058 | 10.0 s              |
| 42:40.5 | Data point 37     | 1.50000 mL | 0.11084 mL | 0.09624 mL | 0.06999 mL | 3.010  | -0.00760 | 0.20188      | 0.00084 | 10.0 s              |

Sample name: **M07\_octanol** Experiment start time: **2/28/2018 7:21:13 PM**  
 Assay name: **pH-metric high logP** Analyst: **Pion**  
 Assay ID: **18B-28013** Instrument ID: **T312060**  
 Filename: **C:\Sirius\_T3\Mehtap\20180228\_exp28\_logP\_T3-2\18B-28013\_M07\_octanol\_pH-metric high logP.t3r**

## Events (continued)

| Time      | Event         | Water      | Acid       | Base       | Octanol    | pH     | dpH/dt   | pH R-squared | pH SD   | dpH/dt time         |
|-----------|---------------|------------|------------|------------|------------|--------|----------|--------------|---------|---------------------|
| 43:16.0   | Data point 38 | 1.50000 mL | 0.11084 mL | 0.09821 mL | 0.06999 mL | 3.218  | -0.00906 | 0.28704      | 0.00084 | 10.0 s              |
| 43:51.4   | Data point 39 | 1.50000 mL | 0.11084 mL | 0.09972 mL | 0.06999 mL | 3.492  | 0.00211  | 0.05894      | 0.00043 | 10.5 s              |
| 44:32.6   | Data point 40 | 1.50000 mL | 0.11084 mL | 0.10061 mL | 0.06999 mL | 3.685  | -0.00509 | 0.57053      | 0.00033 | 10.0 s              |
| 45:18.3   | Data point 41 | 1.50000 mL | 0.11084 mL | 0.10162 mL | 0.06999 mL | 3.880  | -0.00602 | 0.45174      | 0.00044 | 10.0 s              |
| 46:04.1   | Data point 42 | 1.50000 mL | 0.11084 mL | 0.10280 mL | 0.06999 mL | 4.068  | 0.00238  | 0.05728      | 0.00049 | 10.0 s              |
| 46:49.8   | Data point 43 | 1.50000 mL | 0.11084 mL | 0.10412 mL | 0.06999 mL | 4.260  | -0.01117 | 0.50124      | 0.00078 | 10.0 s              |
| 47:25.3   | Data point 44 | 1.50000 mL | 0.11084 mL | 0.10536 mL | 0.06999 mL | 4.437  | -0.00931 | 0.43556      | 0.00070 | 10.0 s              |
| 48:00.7   | Data point 45 | 1.50000 mL | 0.11084 mL | 0.10647 mL | 0.06999 mL | 4.605  | -0.00382 | 0.51934      | 0.00026 | 10.5 s              |
| 48:47.0   | Data point 46 | 1.50000 mL | 0.11084 mL | 0.10753 mL | 0.06999 mL | 4.793  | 0.00774  | 0.33101      | 0.00067 | 10.5 s              |
| 49:38.5   | Data point 47 | 1.50000 mL | 0.11084 mL | 0.10837 mL | 0.06999 mL | 4.999  | 0.00150  | 0.03062      | 0.00042 | 10.5 s              |
| 50:29.8   | Data point 48 | 1.50000 mL | 0.11084 mL | 0.10903 mL | 0.06999 mL | 5.240  | -0.00100 | 0.00811      | 0.00055 | 11.0 s              |
| 51:21.7   | Data point 49 | 1.50000 mL | 0.11084 mL | 0.10943 mL | 0.06999 mL | 5.450  | -0.00888 | 0.38198      | 0.00071 | 11.5 s              |
| 52:14.0   | Data point 50 | 1.50000 mL | 0.11084 mL | 0.10971 mL | 0.06999 mL | 5.658  | -0.01542 | 0.74055      | 0.00089 | 13.0 s              |
| 52:57.5   | Data point 51 | 1.50000 mL | 0.11084 mL | 0.10988 mL | 0.06999 mL | 5.881  | -0.01855 | 0.89943      | 0.00097 | 14.5 s              |
| 53:37.4   | Data point 52 | 1.50000 mL | 0.11084 mL | 0.11000 mL | 0.06999 mL | 6.079  | -0.01880 | 0.89624      | 0.00098 | 24.5 s              |
| 54:32.4   | Data point 53 | 1.50000 mL | 0.11084 mL | 0.11014 mL | 0.06999 mL | 6.513  | -0.01832 | 0.91525      | 0.00095 | 45.5 s              |
| 55:48.5   | Data point 54 | 1.50000 mL | 0.11084 mL | 0.11023 mL | 0.06999 mL | 6.875  | -0.02824 | 0.99129      | 0.00140 | Timed out at 59.5 s |
| 57:24.1   | Data point 55 | 1.50000 mL | 0.11084 mL | 0.11030 mL | 0.06999 mL | 7.353  | -0.05669 | 0.99082      | 0.00281 | Timed out at 59.5 s |
| 58:54.6   | Data point 56 | 1.50000 mL | 0.11084 mL | 0.11035 mL | 0.06999 mL | 7.851  | -0.05247 | 0.99574      | 0.00260 | Timed out at 59.5 s |
| 1:00:25.1 | Data point 57 | 1.50000 mL | 0.11084 mL | 0.11039 mL | 0.06999 mL | 8.195  | -0.03651 | 0.95479      | 0.00184 | Timed out at 59.5 s |
| 1:01:55.6 | Data point 58 | 1.50000 mL | 0.11084 mL | 0.11044 mL | 0.06999 mL | 8.493  | -0.01930 | 0.96296      | 0.00097 | 53.0 s              |
| 1:03:24.4 | Data point 59 | 1.50000 mL | 0.11084 mL | 0.11051 mL | 0.06999 mL | 8.746  | -0.01430 | 0.96004      | 0.00072 | 35.0 s              |
| 1:04:35.2 | Data point 60 | 1.50000 mL | 0.11084 mL | 0.11061 mL | 0.06999 mL | 9.030  | -0.01839 | 0.90118      | 0.00096 | 29.0 s              |
| 1:05:39.8 | Data point 61 | 1.50000 mL | 0.11084 mL | 0.11072 mL | 0.06999 mL | 9.255  | -0.01963 | 0.96157      | 0.00099 | 13.5 s              |
| 1:06:29.0 | Data point 62 | 1.50000 mL | 0.11084 mL | 0.11087 mL | 0.06999 mL | 9.445  | -0.01933 | 0.93954      | 0.00098 | 17.0 s              |
| 1:07:21.8 | Data point 63 | 1.50000 mL | 0.11084 mL | 0.11112 mL | 0.06999 mL | 9.658  | -0.01953 | 0.96611      | 0.00098 | 14.0 s              |
| 1:08:06.4 | Data point 64 | 1.50000 mL | 0.11084 mL | 0.11136 mL | 0.06999 mL | 9.854  | -0.01512 | 0.84020      | 0.00082 | 11.0 s              |
| 1:08:47.9 | Data point 65 | 1.50000 mL | 0.11084 mL | 0.11162 mL | 0.06999 mL | 10.018 | -0.01750 | 0.92297      | 0.00090 | 10.5 s              |
| 1:10:02.6 | Data point 66 | 1.50000 mL | 0.17368 mL | 0.11162 mL | 0.31999 mL | 1.953  | -0.00769 | 0.84527      | 0.00041 | 10.5 s              |
| 1:10:49.3 | Data point 67 | 1.50000 mL | 0.17368 mL | 0.13034 mL | 0.31999 mL | 2.156  | -0.00310 | 0.19456      | 0.00035 | 10.0 s              |
| 1:11:25.0 | Data point 68 | 1.50000 mL | 0.17368 mL | 0.14318 mL | 0.31999 mL | 2.369  | -0.00632 | 0.23843      | 0.00064 | 10.5 s              |
| 1:12:01.1 | Data point 69 | 1.50000 mL | 0.17368 mL | 0.15115 mL | 0.31999 mL | 2.591  | 0.00518  | 0.21450      | 0.00055 | 10.0 s              |
| 1:12:36.7 | Data point 70 | 1.50000 mL | 0.17368 mL | 0.15612 mL | 0.31999 mL | 2.794  | -0.00339 | 0.46040      | 0.00025 | 10.0 s              |
| 1:13:12.2 | Data point 71 | 1.50000 mL | 0.17368 mL | 0.15953 mL | 0.31999 mL | 3.017  | -0.00260 | 0.03972      | 0.00065 | 10.0 s              |
| 1:13:47.7 | Data point 72 | 1.50000 mL | 0.17368 mL | 0.16204 mL | 0.31999 mL | 3.224  | -0.01399 | 0.69435      | 0.00083 | 10.5 s              |
| 1:14:23.6 | Data point 73 | 1.50000 mL | 0.17368 mL | 0.16411 mL | 0.31999 mL | 3.429  | -0.01099 | 0.70364      | 0.00065 | 10.0 s              |
| 1:14:59.0 | Data point 74 | 1.50000 mL | 0.17368 mL | 0.16595 mL | 0.31999 mL | 3.666  | -0.00580 | 0.58863      | 0.00037 | 10.0 s              |
| 1:15:44.8 | Data point 75 | 1.50000 mL | 0.17368 mL | 0.16738 mL | 0.31999 mL | 3.860  | 0.00294  | 0.10993      | 0.00044 | 10.0 s              |
| 1:16:20.3 | Data point 76 | 1.50000 mL | 0.17368 mL | 0.16874 mL | 0.31999 mL | 4.065  | -0.01443 | 0.61135      | 0.00091 | 10.5 s              |
| 1:16:56.2 | Data point 77 | 1.50000 mL | 0.17368 mL | 0.16983 mL | 0.31999 mL | 4.237  | -0.01769 | 0.77303      | 0.00099 | 16.5 s              |
| 1:17:48.5 | Data point 78 | 1.50000 mL | 0.17368 mL | 0.17088 mL | 0.31999 mL | 4.426  | -0.01278 | 0.47370      | 0.00092 | 10.0 s              |
| 1:18:39.5 | Data point 79 | 1.50000 mL | 0.17368 mL | 0.17171 mL | 0.31999 mL | 4.649  | -0.00486 | 0.31109      | 0.00043 | 10.5 s              |
| 1:19:31.0 | Data point 80 | 1.50000 mL | 0.17368 mL | 0.17225 mL | 0.31999 mL | 4.855  | -0.00462 | 0.06310      | 0.00091 | 10.5 s              |
| 1:20:22.3 | Data point 81 | 1.50000 mL | 0.17368 mL | 0.17260 mL | 0.31999 mL | 5.067  | -0.00056 | 0.00122      | 0.00080 | 10.5 s              |
| 1:21:03.3 | Data point 82 | 1.50000 mL | 0.17368 mL | 0.17281 mL | 0.31999 mL | 5.289  | -0.01845 | 0.83141      | 0.00100 | 11.5 s              |
| 1:21:40.3 | Data point 83 | 1.50000 mL | 0.17368 mL | 0.17293 mL | 0.31999 mL | 5.442  | -0.01376 | 0.70225      | 0.00081 | 11.5 s              |
| 1:22:22.3 | Data point 84 | 1.50000 mL | 0.17368 mL | 0.17307 mL | 0.31999 mL | 5.745  | -0.01592 | 0.71364      | 0.00093 | 16.5 s              |
| 1:23:09.4 | Data point 85 | 1.50000 mL | 0.17368 mL | 0.17326 mL | 0.31999 mL | 6.515  | -0.03653 | 0.99353      | 0.00181 | Timed out at 59.5 s |
| 1:24:45.1 | Data point 86 | 1.50000 mL | 0.17368 mL | 0.17335 mL | 0.31999 mL | 6.950  | -0.06050 | 0.97491      | 0.00303 | Timed out at 59.5 s |
| 1:26:15.6 | Data point 87 | 1.50000 mL | 0.17368 mL | 0.17340 mL | 0.31999 mL | 7.287  | -0.05907 | 0.99436      | 0.00292 | Timed out at 59.5 s |

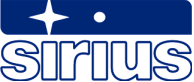

## Assay Events

Sample name: **M07\_octanol**  
Assay name: **pH-metric high logP**  
Assay ID: **18B-28013**  
Filename: **C:\Sirius\_T3\Mehtap\20180228\_exp28\_logP\_T3-2\18B-28013\_M07\_octanol\_pH-metric high logP.t3r**

Experiment start time: **2/28/2018 7:21:13 PM**  
Analyst: **Pion**  
Instrument ID: **T312060**

**Events (continued)**

| Time      | Event         | Water      | Acid       | Base       | Octanol    | pH     | dpH/dt   | pH R-squared | pH SD   | dpH/dt time         |
|-----------|---------------|------------|------------|------------|------------|--------|----------|--------------|---------|---------------------|
| 1:27:46.0 | Data point 88 | 1.50000 mL | 0.17368 mL | 0.17345 mL | 0.31999 mL | 7.543  | -0.06077 | 0.98579      | 0.00302 | Timed out at 59.5 s |
| 1:29:26.9 | Data point 89 | 1.50000 mL | 0.17368 mL | 0.17373 mL | 0.31999 mL | 8.640  | -0.01815 | 0.88900      | 0.00095 | 55.0 s              |
| 1:30:57.7 | Data point 90 | 1.50000 mL | 0.17368 mL | 0.17389 mL | 0.31999 mL | 9.020  | -0.01693 | 0.78905      | 0.00094 | 16.5 s              |
| 1:31:55.0 | Data point 91 | 1.50000 mL | 0.17368 mL | 0.17406 mL | 0.31999 mL | 9.240  | -0.01696 | 0.79810      | 0.00094 | 13.0 s              |
| 1:32:38.5 | Data point 92 | 1.50000 mL | 0.17368 mL | 0.17420 mL | 0.31999 mL | 9.465  | -0.01825 | 0.92964      | 0.00094 | 13.5 s              |
| 1:33:22.6 | Data point 93 | 1.50000 mL | 0.17368 mL | 0.17444 mL | 0.31999 mL | 9.701  | -0.00732 | 0.21315      | 0.00078 | 11.5 s              |
| 1:34:04.7 | Data point 94 | 1.50000 mL | 0.17368 mL | 0.17467 mL | 0.31999 mL | 9.894  | -0.01667 | 0.74381      | 0.00095 | 10.5 s              |
| 1:34:45.7 | Data point 95 | 1.50000 mL | 0.17368 mL | 0.17491 mL | 0.31999 mL | 10.021 | -0.01410 | 0.74350      | 0.00081 | 10.0 s              |
| 1:35:04.9 | Assay volumes | 1.50000 mL | 0.17368 mL | 0.17491 mL | 0.31999 mL |        |          |              |         |                     |



Sample name: **M07\_octanol**  
 Assay name: **pH-metric high logP**  
 Assay ID: **18B-28013**  
 Filename: **C:\Sirius\_T3\Mehtap\20180228\_exp28\_logP\_T3-2\18B-28013\_M07\_octanol\_pH-metric high logP.t3r**

Experiment start time: **2/28/2018 7:21:13 PM**  
 Analyst: **Pion**  
 Instrument ID: **T312060**

## Assay Settings

| Setting                             | Value              | Original Value | Date/Time changed | Imported from |
|-------------------------------------|--------------------|----------------|-------------------|---------------|
| <b>General Settings</b>             |                    |                |                   |               |
| Analyst name                        | Pion               |                |                   |               |
| <b>Standard Experiment Settings</b> |                    |                |                   |               |
| Number of titrations                | 3                  |                |                   |               |
| Minimum pH                          | 2.000              |                |                   |               |
| Maximum pH                          | 10.000             |                |                   |               |
| pH step between points of           | 0.200              |                |                   |               |
| Minimum titrant addition            | 0.00002 mL         |                |                   |               |
| Maximum titrant addition            | 0.10000 mL         |                |                   |               |
| Argon flow rate                     | 100%               |                |                   |               |
| Start titration using               | Cautious pH adjust |                |                   |               |
| <b>Advanced General Settings</b>    |                    |                |                   |               |
| Detect turbidity using              | None               |                |                   |               |
| Collect turbidity sensor data       | No                 |                |                   |               |
| Collect UV spectra                  | No                 |                |                   |               |
| Stir after titrant addition for     | 5 seconds          |                |                   |               |
| For titrant addition, stir at       | 10%                |                |                   |               |
| <b>Titration Pre-Dose</b>           |                    |                |                   |               |
| Titration pre-dose                  | None               |                |                   |               |
| <b>Assay Medium</b>                 |                    |                |                   |               |
| ISA water volume                    | 1.50 mL            |                |                   |               |
| Water added                         | Automatic          |                |                   |               |
| Partition solvent type              | Octanol            |                |                   |               |
| Partition volume                    | 0.020 mL           |                |                   |               |
| Partition solvent added             | Automatic          |                |                   |               |
| After partition addition, stir for  | 1 seconds          |                |                   |               |
| <b>Sample Sonication</b>            |                    |                |                   |               |
| Sonicate                            | Yes                |                |                   |               |
| Adjust pH for sonication            | No                 |                |                   |               |
| Sonicate for                        | 300 seconds        |                |                   |               |
| After sonication stir for           | 5 seconds          |                |                   |               |
| <b>Sample Dissolution</b>           |                    |                |                   |               |
| Perform a dissolution stage         | Yes                |                |                   |               |
| Adjust and hold pH for dissolution  | To start pH        |                |                   |               |
| Stir to dissolve for                | 120 seconds        |                |                   |               |
| For dissolution, stir at            | 10%                |                |                   |               |
| <b>Carbonate purge</b>              |                    |                |                   |               |
| Perform a carbonate purge           | No                 |                |                   |               |
| <b>Temperature Control</b>          |                    |                |                   |               |
| Wait for temperature                | Yes                |                |                   |               |
| Required start temperature          | 25.0°C             |                |                   |               |
| Acceptable deviation                | 0.5°C              |                |                   |               |
| Time to wait                        | 60 seconds         |                |                   |               |
| Stir speed of                       | 50%                |                |                   |               |
| <b>Titration 1</b>                  |                    |                |                   |               |
| Titrate from                        | Low to high pH     |                |                   |               |
| Adjust to start pH                  | Yes                |                |                   |               |
| After pH adjust stir for            | 30 seconds         |                |                   |               |
| Stir to allow partitioning for      | 15 seconds         |                |                   |               |
| Stirrer speed for partitioning      | 50%                |                |                   |               |
| <b>Titration 2</b>                  |                    |                |                   |               |
| Titrate from                        | Low to high pH     |                |                   |               |
| Add additional water                | 0.00 mL            |                |                   |               |
| Additional partition solvent volume | 0.050 mL           |                |                   |               |
| Additional partition solvent added  | Automatic          |                |                   |               |
| After pH adjust stir for            | 30 seconds         |                |                   |               |
| Stir to allow partitioning for      | 15 seconds         |                |                   |               |
| Stirrer speed for partitioning      | 55%                |                |                   |               |



Sample name: **M07\_octanol**  
 Assay name: **pH-metric high logP**  
 Assay ID: **18B-28013**  
 Filename: **C:\Sirius\_T3\Mehtap\20180228\_exp28\_logP\_T3-2\18B-28013\_M07\_octanol\_pH-metric high logP.t3r**

Experiment start time: **2/28/2018 7:21:13 PM**  
 Analyst: **Pion**  
 Instrument ID: **T312060**

## Assay Settings (continued)

| Setting                             | Value          | Original Value | Date/Time changed | Imported from |
|-------------------------------------|----------------|----------------|-------------------|---------------|
| <b>Titration 3</b>                  |                |                |                   |               |
| Titrate from                        | Low to high pH |                |                   |               |
| Add additional water                | 0.00 mL        |                |                   |               |
| Additional partition solvent volume | 0.250 mL       |                |                   |               |
| Additional partition solvent added  | Automatic      |                |                   |               |
| After pH adjust stir for            | 30 seconds     |                |                   |               |
| Stir to allow partitioning for      | 15 seconds     |                |                   |               |
| Stirrer speed for partitioning      | 60%            |                |                   |               |
| <b>Data Point Stability</b>         |                |                |                   |               |
| Stir during data point collection   | No             |                |                   |               |
| Delay before data point collection  | 0 seconds      |                |                   |               |
| Number of points to average         | 20 points      |                |                   |               |
| Time interval between points        | 0.50 seconds   |                |                   |               |
| Required maximum standard deviation | 0.00100 dpH/dt |                |                   |               |
| Stability timeout after             | 60 seconds     |                |                   |               |

## Calibration Settings

| Setting                   | Value  | Date/Time changed    | Imported from             |
|---------------------------|--------|----------------------|---------------------------|
| Four-Plus alpha           | 0.130  | 2/28/2018 7:21:12 PM | C:\Sirius_T3\HCl18B27.t3r |
| Four-Plus S               | 0.9970 | 2/28/2018 7:21:12 PM | C:\Sirius_T3\HCl18B27.t3r |
| Four-Plus jH              | 0.8    | 2/28/2018 7:21:12 PM | C:\Sirius_T3\HCl18B27.t3r |
| Four-Plus jOH             | -0.4   | 2/28/2018 7:21:12 PM | C:\Sirius_T3\HCl18B27.t3r |
| Base concentration factor | 1.000  | 2/28/2018 7:21:13 PM | C:\Sirius_T3\KOH18B27.t3r |
| Acid concentration factor | 0.994  | 2/28/2018 7:21:12 PM | C:\Sirius_T3\HCl18B27.t3r |

## Instrument Settings

| Setting              | Value                      | Batch Id    | Install date           |
|----------------------|----------------------------|-------------|------------------------|
| Instrument owner     | Merck                      |             |                        |
| Instrument ID        | T312060                    |             |                        |
| Instrument type      | T3 Simulator               |             |                        |
| Software version     | 1.1.3.0                    |             |                        |
| Dispenser module     |                            | T3DM1200361 | 3/31/2009 5:24:52 AM   |
| Dispenser 0          | Water                      |             | 3/31/2009 5:25:05 AM   |
| Syringe volume       | 2.5 mL                     |             |                        |
| Firmware version     | 1.2.1(r2)                  |             |                        |
| Titrant              | Water (0.15 M KCl)         | 02-06-2018  | 2/27/2018 10:05:59 AM  |
| Dispenser 2          | Acid                       |             | 3/31/2009 5:25:11 AM   |
| Syringe volume       | 0.5 mL                     |             |                        |
| Firmware version     | 1.2.1(r2)                  |             |                        |
| Titrant              | Acid (0.5 M HCl)           | 02-27-2018  | 2/27/2018 10:27:22 AM  |
| Dispenser 1          | Base                       |             | 3/31/2009 5:25:21 AM   |
| Syringe volume       | 0.5 mL                     |             |                        |
| Firmware version     | 1.2.1(r2)                  |             |                        |
| Titrant              | Base (0.5 M KOH)           | 9/22/2017   | 2/27/2018 10:21:22 AM  |
| Dispenser 5          | Cosolvent                  |             | 3/31/2009 5:26:24 AM   |
| Syringe volume       | 2.5 mL                     |             |                        |
| Firmware version     | 1.2.1(r2)                  |             |                        |
| Distribution valve 5 | Distribution Valve         |             | 3/31/2009 5:28:19 AM   |
| Firmware version     | 1.1.3                      |             |                        |
| Port A               | Methanol (80%, 0.15 M KCl) | 09-26-17    | 2/7/2018 9:42:01 AM    |
| Port B               | Cyclohexane                | 11-01-17    | 2/27/2018 10:37:57 AM  |
| Dispenser 3          | Buffer                     |             | 8/3/2010 5:05:16 AM    |
| Syringe volume       | 0.5 mL                     |             |                        |
| Firmware version     | 1.2.1(r2)                  |             |                        |
| Titrant              | Dodecane                   | 2018/01/31  | 2/28/2018 10:18:04 AM  |
| Dispenser 6          | Octanol                    |             | 10/22/2010 10:52:43 AM |

Sample name: **M07\_octanol**  
 Assay name: **pH-metric high logP**  
 Assay ID: **18B-28013**  
 Filename: **C:\Sirius\_T3\Mehtap\20180228\_exp28\_logP\_T3-2\18B-28013\_M07\_octanol\_pH-metric high logP.t3r**

Experiment start time: **2/28/2018 7:21:13 PM**  
 Analyst: **Pion**  
 Instrument ID: **T312060**

## Instrument Settings (continued)

| Setting                                   | Value                      | Batch Id    | Install date           |
|-------------------------------------------|----------------------------|-------------|------------------------|
| Syringe volume                            | 0.5 mL                     |             |                        |
| Firmware version                          | 1.2.1(r2)                  |             |                        |
| Titrant                                   | Octanol                    | 01-31-2018  | 2/27/2018 9:59:35 AM   |
| Titration                                 |                            | T3TM1200161 | 3/31/2009 5:24:17 AM   |
| Horizontal axis firmware version          | 1.17 AI1DI2DO2 Stepper 2   |             |                        |
| Vertical axis firmware version            | 1.17 AI1DI2DO2 Stepper 2   |             |                        |
| Chassis I/O firmware version              | 1.11 AI1DI0DO4 Norgren I/O |             |                        |
| Probe I/O firmware version                | 1.1.1                      |             |                        |
| Electrode                                 | T3 Electrode               | T3E0923     | 1/23/2018 2:01:00 PM   |
| E0 calibration                            | +4.31 mV                   |             | 2/28/2018 7:21:41 PM   |
| Filling solution                          | 3M KCl                     | KCL097      | 2/27/2018 9:49:43 AM   |
| Liquids                                   |                            |             |                        |
| Wash 1                                    | 50% IPA:50% Water          |             | 2/28/2018 10:23:32 AM  |
| Wash 2                                    | 0.5% Triton X-100 in H2O   |             | 2/28/2018 10:23:34 AM  |
| Buffer position 1                         | pH7 Wash                   |             | 2/28/2018 10:24:06 AM  |
| Buffer position 2                         | pH 7                       |             | 2/28/2018 10:24:08 AM  |
| Storage position                          |                            |             | 2/28/2018 10:21:14 AM  |
| Wash water                                | 8.7e+003 mL                | 02-27-2018  | 2/27/2018 9:54:39 AM   |
| Waste                                     | 6.7e+003 mL                |             | 11/28/2017 10:36:29 AM |
| Temperature controller                    |                            |             | 8/5/2010 6:35:13 AM    |
| Turbidity detector                        |                            |             | 3/31/2009 5:24:45 AM   |
| Spectrometer                              |                            | 074811      | 11/23/2010 11:22:28 AM |
| Dip probe                                 |                            | 10196       |                        |
| Wavelength coefficient A0                 | 183.333                    |             |                        |
| Wavelength coefficient A1                 | 2.21568                    |             |                        |
| Wavelength coefficient A2                 | -0.000289308               |             |                        |
| Total lamp lit time                       | 112:08:55                  |             | 11/23/2010 11:22:28 AM |
| Calibrated on                             | 2/27/2018 10:40:38 AM      |             |                        |
| Integration time                          | 40                         |             |                        |
| Scans averaged                            | 10                         |             |                        |
| Autoloader                                |                            | T3AL1200345 | 11/10/2015 9:34:13 AM  |
| Left-right axis firmware version          | 1.17 AI1DI2DO2 Stepper 2   |             |                        |
| Front-back axis firmware version          | 1.17 AI1DI2DO2 Stepper 2   |             |                        |
| Vertical axis firmware version            | 1.17 AI1DI2DO2 Stepper 2   |             |                        |
| Chassis I/O firmware version              | 1.11 AI1DI0DO4 Norgren I/O |             |                        |
| Configuration                             |                            |             |                        |
| Alternate titration position              | Titration position         |             |                        |
| Alternate reference position              | Reference position         |             |                        |
| Maximum standard vial volume              | 3.50 mL                    |             |                        |
| Maximum alternate vial volume             | 25.00 mL                   |             |                        |
| Automatic action idle period              | 5 minute(s)                |             |                        |
| Titration tube volume                     | 1.3 mL                     |             |                        |
| Syringe flush count                       | 3.50                       |             |                        |
| Flowing wash pump volume                  | 20.0 mL                    |             |                        |
| Flowing wash stir duration                | 5 s                        |             |                        |
| Flowing wash stir speed                   | 30%                        |             |                        |
| Solvent wash stir duration                | 5 s                        |             |                        |
| Solvent wash stir speed                   | 30%                        |             |                        |
| Surfactant wash stir duration             | 5 s                        |             |                        |
| Surfactant wash stir speed                | 30%                        |             |                        |
| E0 calibration minimum number of points   | 10                         |             |                        |
| E0 calibration maximum standard deviation | 0.01500                    |             |                        |
| E0 calibration timeout period             | 60 s                       |             |                        |
| E0 calibration stir duration              | 5 s                        |             |                        |
| E0 calibration preparation stir speed     | 30%                        |             |                        |
| E0 calibration buffer wash stir duration  | 5 s                        |             |                        |
| E0 calibration buffer wash stir speed     | 30%                        |             |                        |
| E0 calibration reading stir speed         | 0%                         |             |                        |

Sample name: **M07\_octanol** Experiment start time: **2/28/2018 7:21:13 PM**  
 Assay name: **pH-metric high logP** Analyst: **Pion**  
 Assay ID: **18B-28013** Instrument ID: **T312060**  
 Filename: **C:\Sirius\_T3\Mehtap\20180228\_exp28\_logP\_T3-2\18B-28013\_M07\_octanol\_pH-metric high logP.t3r**

## Instrument Settings (continued)

| Setting                                     | Value   | Batch Id | Install date |
|---------------------------------------------|---------|----------|--------------|
| Spectrometer calibration stir duration      | 5 s     |          |              |
| Spectrometer calibration stir speed         | 30%     |          |              |
| Spectrometer calibration wash pump volume   | 20.0 mL |          |              |
| Spectrometer calibration wash stir duration | 5 s     |          |              |
| Spectrometer calibration wash stir speed    | 30%     |          |              |
| Overhead dispense height                    | 10000   |          |              |

## Refinement Settings

| Setting                        | Value    | Default value |
|--------------------------------|----------|---------------|
| Turbidity detection method     | None     | None          |
| Turbidity wavelength to assess | 500.0 nm | 500.0 nm      |
| Turbidity maximum absorbance   | 0.100    | 0.100         |
| Turbidity probe threshold      | 50.00    | 50.00         |

## Experiment Log

[2:37] Air gap created for Water (0.15 M KCl)  
 [2:37] Air gap created for Acid (0.5 M HCl)  
 [2:38] Air gap created for Base (0.5 M KOH)  
 [2:38] Air gap released for Water (0.15 M KCl)  
 [2:42] Titrator arm moved over Titration position  
 [2:42] Titration 1 of 3  
 [2:42] Adding initial titrants  
 [2:42] Automatically add 1.50000 mL of water  
 [3:07] Dispensed 1.500000 mL of Water (0.15 M KCl)  
 [3:11] Titrator arm moved over Drain  
 [8:52] Titrator arm moved to Titration position  
 [8:52] Argon flow rate set to 100  
 [8:52] Stirrer speed set to 10  
 [8:57] Automatically add 0.02000 mL of Octanol  
 [8:58] Dispensed 0.019991 mL of Octanol  
 [8:59] Initial pH = 6.72  
 [8:59] Iterative adjust 6.72 -> 2.00  
 [8:59] pH 6.72 -> 2.00  
 [9:01] Air gap released for Acid (0.5 M HCl)  
 [9:01] Dispensed 0.051905 mL of Acid (0.5 M HCl)  
 [9:06] Holding pH 2.00  
 [11:07] Stirrer speed set to 0  
 [11:07] Stirrer speed set to 50  
 [11:07] Iterative adjust 1.98 -> 2.00  
 [11:07] pH 1.98 -> 2.00  
 [11:07] Air gap released for Base (0.5 M KOH)  
 [11:08] Dispensed 0.002070 mL of Base (0.5 M KOH)  
 [11:58] Stirrer speed set to 0  
 [12:08] Datapoint id 1 collected  
 [12:08] Stirrer speed set to 50  
 [12:13] pH 2.01 -> 2.21  
 [12:13] Using cautious pH adjust  
 [12:14] Dispensed 0.007761 mL of Base (0.5 M KOH)  
 [12:19] Stepping pH = 2.10  
 [12:19] Dispensed 0.005644 mL of Base (0.5 M KOH)  
 [12:24] Stepping pH = 2.19  
 [12:24] Dispensed 0.001270 mL of Base (0.5 M KOH)  
 [12:29] Stepping pH = 2.21  
 [12:44] Stirrer speed set to 0  
 [12:55] Datapoint id 2 collected  
 [12:55] Charge balance equation is out by 5.6%  
 [12:55] Stirrer speed set to 50

Sample name: **M07\_octanol**  
Assay name: **pH-metric high logP**  
Assay ID: **18B-28013**  
Filename: **C:\Sirius\_T3\Mehtap\20180228\_exp28\_logP\_T3-2\18B-28013\_M07\_octanol\_pH-metric high logP.t3r**

Experiment start time: **2/28/2018 7:21:13 PM**  
Analyst: **Pion**  
Instrument ID: **T312060**

## Experiment Log (continued)

[13:00] pH 2.21 -> 2.41  
[13:00] Using charge balance adjust  
[13:00] Dispensed 0.009690 mL of Base (0.5 M KOH)  
[13:21] Stirrer speed set to 0  
[13:31] Datapoint id 3 collected  
[13:31] Charge balance equation is out by 8.2%  
[13:31] Stirrer speed set to 50  
[13:36] pH 2.44 -> 2.64  
[13:36] Using charge balance adjust  
[13:36] Dispensed 0.005786 mL of Base (0.5 M KOH)  
[13:56] Stirrer speed set to 0  
[14:06] Datapoint id 4 collected  
[14:06] Charge balance equation is out by -2.6%  
[14:06] Stirrer speed set to 50  
[14:11] pH 2.64 -> 2.84  
[14:11] Using charge balance adjust  
[14:12] Dispensed 0.003645 mL of Base (0.5 M KOH)  
[14:32] Stirrer speed set to 0  
[14:42] Datapoint id 5 collected  
[14:42] Charge balance equation is out by 15.5%  
[14:42] Stirrer speed set to 50  
[14:47] pH 2.88 -> 3.08  
[14:47] Using cautious pH adjust  
[14:47] Dispensed 0.001082 mL of Base (0.5 M KOH)  
[14:52] Stepping pH = 2.97  
[14:52] Dispensed 0.000729 mL of Base (0.5 M KOH)  
[14:57] Stepping pH = 3.05  
[14:57] Dispensed 0.000212 mL of Base (0.5 M KOH)  
[15:02] Stepping pH = 3.07  
[15:18] Stirrer speed set to 0  
[15:28] Datapoint id 6 collected  
[15:28] Charge balance equation is out by 6.5%  
[15:28] Stirrer speed set to 50  
[15:33] pH 3.07 -> 3.27  
[15:33] Using charge balance adjust  
[15:33] Dispensed 0.001458 mL of Base (0.5 M KOH)  
[15:53] Stirrer speed set to 0  
[16:04] Datapoint id 7 collected  
[16:04] Charge balance equation is out by 1.7%  
[16:04] Stirrer speed set to 50  
[16:09] pH 3.28 -> 3.48  
[16:09] Using charge balance adjust  
[16:09] Dispensed 0.001035 mL of Base (0.5 M KOH)  
[16:29] Stirrer speed set to 0  
[16:39] Datapoint id 8 collected  
[16:39] Charge balance equation is out by 8.8%  
[16:39] Stirrer speed set to 50  
[16:44] pH 3.50 -> 3.70  
[16:44] Using charge balance adjust  
[16:44] Dispensed 0.000847 mL of Base (0.5 M KOH)  
[17:04] Stirrer speed set to 0  
[17:14] Datapoint id 9 collected  
[17:14] Charge balance equation is out by 18.0%  
[17:14] Stirrer speed set to 50  
[17:19] pH 3.74 -> 3.94  
[17:19] Using cautious pH adjust  
[17:20] Dispensed 0.000423 mL of Base (0.5 M KOH)  
[17:25] Stepping pH = 3.87  
[17:25] Dispensed 0.000188 mL of Base (0.5 M KOH)

Sample name: **M07\_octanol**  
Assay name: **pH-metric high logP**  
Assay ID: **18B-28013**  
Filename: **C:\Sirius\_T3\Mehtap\20180228\_exp28\_logP\_T3-2\18B-28013\_M07\_octanol\_pH-metric high logP.t3r**

Experiment start time: **2/28/2018 7:21:13 PM**  
Analyst: **Pion**  
Instrument ID: **T312060**

## Experiment Log (continued)

[17:30] Stepping pH = 3.94  
[17:45] Stirrer speed set to 0  
[17:55] Datapoint id 10 collected  
[17:55] Charge balance equation is out by 27.2%  
[17:55] Stirrer speed set to 50  
[18:00] pH 3.92 -> 4.12  
[18:00] Using cautious pH adjust  
[18:00] Dispensed 0.000470 mL of Base (0.5 M KOH)  
[18:05] Stepping pH = 4.08  
[18:05] Dispensed 0.000094 mL of Base (0.5 M KOH)  
[18:10] Stepping pH = 4.11  
[18:11] Dispensed 0.000047 mL of Base (0.5 M KOH)  
[18:16] Stepping pH = 4.12  
[18:31] Stirrer speed set to 0  
[18:41] Datapoint id 11 collected  
[18:41] Charge balance equation is out by 32.3%  
[18:41] Stirrer speed set to 50  
[18:46] pH 4.09 -> 4.29  
[18:46] Using cautious pH adjust  
[18:46] Dispensed 0.000517 mL of Base (0.5 M KOH)  
[18:51] Stepping pH = 4.26  
[18:51] Dispensed 0.000094 mL of Base (0.5 M KOH)  
[18:56] Stepping pH = 4.27  
[18:56] Dispensed 0.000071 mL of Base (0.5 M KOH)  
[19:01] Stepping pH = 4.28  
[19:16] Stirrer speed set to 0  
[19:26] Datapoint id 12 collected  
[19:26] Charge balance equation is out by 33.6%  
[19:26] Stirrer speed set to 50  
[19:32] pH 4.27 -> 4.47  
[19:32] Using cautious pH adjust  
[19:32] Dispensed 0.000588 mL of Base (0.5 M KOH)  
[19:37] Stepping pH = 4.44  
[19:37] Dispensed 0.000094 mL of Base (0.5 M KOH)  
[19:42] Stepping pH = 4.44  
[19:42] Dispensed 0.000282 mL of Base (0.5 M KOH)  
[19:47] Stepping pH = 4.52  
[20:02] Stirrer speed set to 0  
[20:13] Datapoint id 13 collected  
[20:13] Charge balance equation is out by 16.4%  
[20:13] Stirrer speed set to 50  
[20:18] pH 4.48 -> 4.68  
[20:18] Using cautious pH adjust  
[20:18] Dispensed 0.000635 mL of Base (0.5 M KOH)  
[20:23] Stepping pH = 4.63  
[20:23] Dispensed 0.000188 mL of Base (0.5 M KOH)  
[20:28] Stepping pH = 4.65  
[20:28] Dispensed 0.000188 mL of Base (0.5 M KOH)  
[20:33] Stepping pH = 4.68  
[20:48] Stirrer speed set to 0  
[21:00] Datapoint id 14 collected  
[21:00] Charge balance equation is out by 20.8%  
[21:00] Stirrer speed set to 50  
[21:05] pH 4.68 -> 4.88  
[21:05] Using cautious pH adjust  
[21:05] Dispensed 0.000611 mL of Base (0.5 M KOH)  
[21:10] Stepping pH = 4.81  
[21:10] Dispensed 0.000235 mL of Base (0.5 M KOH)  
[21:15] Stepping pH = 4.80

Sample name: **M07\_octanol**  
Assay name: **pH-metric high logP**  
Assay ID: **18B-28013**  
Filename: **C:\Sirius\_T3\Mehtap\20180228\_exp28\_logP\_T3-2\18B-28013\_M07\_octanol\_pH-metric high logP.t3r**

Experiment start time: **2/28/2018 7:21:13 PM**  
Analyst: **Pion**  
Instrument ID: **T312060**

## Experiment Log (continued)

[21:16] Dispensed 0.001341 mL of Base (0.5 M KOH)  
[21:21] Stepping pH = 5.06  
[21:36] Stirrer speed set to 0  
[21:49] Datapoint id 15 collected  
[21:49] Charge balance equation is out by -79.3%  
[21:49] Stirrer speed set to 50  
[21:54] pH 5.00 -> 5.20  
[21:54] Using cautious pH adjust  
[21:55] Dispensed 0.000494 mL of Base (0.5 M KOH)  
[22:00] Stepping pH = 5.09  
[22:00] Dispensed 0.000353 mL of Base (0.5 M KOH)  
[22:05] Stepping pH = 5.13  
[22:05] Dispensed 0.000400 mL of Base (0.5 M KOH)  
[22:10] Stepping pH = 5.20  
[22:25] Stirrer speed set to 0  
[22:39] Datapoint id 16 collected  
[22:39] Charge balance equation is out by -26.8%  
[22:39] Stirrer speed set to 50  
[22:44] pH 5.18 -> 5.38  
[22:44] Using cautious pH adjust  
[22:44] Dispensed 0.000400 mL of Base (0.5 M KOH)  
[22:49] Stepping pH = 5.27  
[22:49] Dispensed 0.000306 mL of Base (0.5 M KOH)  
[22:55] Stepping pH = 5.32  
[22:55] Dispensed 0.000235 mL of Base (0.5 M KOH)  
[23:00] Stepping pH = 5.34  
[23:00] Dispensed 0.000235 mL of Base (0.5 M KOH)  
[23:05] Stepping pH = 5.39  
[23:20] Stirrer speed set to 0  
[23:37] Datapoint id 17 collected  
[23:37] Charge balance equation is out by -49.3%  
[23:37] Stirrer speed set to 50  
[23:42] pH 5.37 -> 5.57  
[23:42] Using cautious pH adjust  
[23:42] Dispensed 0.000306 mL of Base (0.5 M KOH)  
[23:47] Stepping pH = 5.42  
[23:47] Dispensed 0.000400 mL of Base (0.5 M KOH)  
[23:52] Stepping pH = 5.57  
[24:07] Stirrer speed set to 0  
[24:28] Datapoint id 18 collected  
[24:28] Charge balance equation is out by -17.6%  
[24:28] Stirrer speed set to 50  
[24:33] pH 5.54 -> 5.74  
[24:33] Using cautious pH adjust  
[24:33] Dispensed 0.000235 mL of Base (0.5 M KOH)  
[24:38] Stepping pH = 5.60  
[24:38] Dispensed 0.000282 mL of Base (0.5 M KOH)  
[24:43] Stepping pH = 5.75  
[24:58] Stirrer speed set to 0  
[25:19] Datapoint id 19 collected  
[25:19] Charge balance equation is out by -11.9%  
[25:19] Stirrer speed set to 50  
[25:24] pH 5.71 -> 5.91  
[25:24] Using charge balance adjust  
[25:24] Dispensed 0.000329 mL of Base (0.5 M KOH)  
[25:44] Stirrer speed set to 0  
[26:07] Datapoint id 20 collected  
[26:07] Charge balance equation is out by -52.3%  
[26:07] Stirrer speed set to 50



Sample name: **M07\_octanol**  
Assay name: **pH-metric high logP**  
Assay ID: **18B-28013**  
Filename: **C:\Sirius\_T3\Mehtap\20180228\_exp28\_logP\_T3-2\18B-28013\_M07\_octanol\_pH-metric high logP.t3r**

Experiment start time: **2/28/2018 7:21:13 PM**  
Analyst: **Pion**  
Instrument ID: **T312060**

## Experiment Log (continued)

[26:12] pH 5.85 -> 6.05  
[26:12] Using cautious pH adjust  
[26:12] Dispensed 0.000141 mL of Base (0.5 M KOH)  
[26:18] Stepping pH = 5.89  
[26:18] Dispensed 0.000212 mL of Base (0.5 M KOH)  
[26:23] Stepping pH = 6.08  
[26:38] Stirrer speed set to 0  
[27:02] Datapoint id 21 collected  
[27:02] Charge balance equation is out by -33.5%  
[27:02] Stirrer speed set to 50  
[27:07] pH 6.07 -> 6.27  
[27:07] Using cautious pH adjust  
[27:08] Dispensed 0.000094 mL of Base (0.5 M KOH)  
[27:13] Stepping pH = 6.09  
[27:13] Dispensed 0.000235 mL of Base (0.5 M KOH)  
[27:18] Stepping pH = 6.43  
[27:33] Stirrer speed set to 0  
[28:09] Datapoint id 22 collected  
[28:09] Charge balance equation is out by -82.8%  
[28:09] Stirrer speed set to 50  
[28:14] pH 6.40 -> 6.60  
[28:14] Using cautious pH adjust  
[28:14] Dispensed 0.000047 mL of Base (0.5 M KOH)  
[28:19] Stepping pH = 6.39  
[28:19] Dispensed 0.000259 mL of Base (0.5 M KOH)  
[28:24] Stepping pH = 7.32  
[28:39] Stirrer speed set to 0  
[29:40] Datapoint id 23 collected  
[29:40] Charge balance equation is out by -208.7%  
[29:40] Stirrer speed set to 50  
[29:45] pH 7.40 -> 7.60  
[29:45] Using cautious pH adjust  
[29:45] Dispensed 0.000024 mL of Base (0.5 M KOH)  
[29:50] Stepping pH = 7.44  
[29:50] Dispensed 0.000024 mL of Base (0.5 M KOH)  
[29:55] Stepping pH = 7.46  
[29:55] Dispensed 0.000024 mL of Base (0.5 M KOH)  
[30:00] Stepping pH = 7.49  
[30:00] Dispensed 0.000047 mL of Base (0.5 M KOH)  
[30:05] Stepping pH = 7.77  
[30:20] Stirrer speed set to 0  
[31:20] Datapoint id 24 collected  
[31:20] Charge balance equation is out by -679.3%  
[31:20] Stirrer speed set to 50  
[31:25] pH 8.02 -> 8.22  
[31:25] Using cautious pH adjust  
[31:25] Dispensed 0.000024 mL of Base (0.5 M KOH)  
[31:31] Stepping pH = 8.06  
[31:31] Dispensed 0.000024 mL of Base (0.5 M KOH)  
[31:36] Stepping pH = 8.12  
[31:36] Dispensed 0.000024 mL of Base (0.5 M KOH)  
[31:41] Stepping pH = 8.37  
[31:56] Stirrer speed set to 0  
[32:56] Datapoint id 25 collected  
[32:56] Charge balance equation is out by -627.8%  
[32:56] Stirrer speed set to 50  
[33:01] pH 8.46 -> 8.66  
[33:01] Using cautious pH adjust  
[33:01] Dispensed 0.000024 mL of Base (0.5 M KOH)

Sample name: **M07\_octanol**  
Assay name: **pH-metric high logP**  
Assay ID: **18B-28013**  
Filename: **C:\Sirius\_T3\Mehtap\20180228\_exp28\_logP\_T3-2\18B-28013\_M07\_octanol\_pH-metric high logP.t3r**

Experiment start time: **2/28/2018 7:21:13 PM**  
Analyst: **Pion**  
Instrument ID: **T312060**

## Experiment Log (continued)

[33:06] Stepping pH = 8.44  
[33:06] Dispensed 0.000047 mL of Base (0.5 M KOH)  
[33:11] Stepping pH = 8.80  
[33:26] Stirrer speed set to 0  
[34:12] Datapoint id 26 collected  
[34:12] Charge balance equation is out by -310.7%  
[34:12] Stirrer speed set to 50  
[34:17] pH 8.74 -> 8.94  
[34:17] Using cautious pH adjust  
[34:17] Dispensed 0.000024 mL of Base (0.5 M KOH)  
[34:22] Stepping pH = 8.71  
[34:22] Dispensed 0.000071 mL of Base (0.5 M KOH)  
[34:27] Stepping pH = 9.00  
[34:43] Stirrer speed set to 0  
[35:14] Datapoint id 27 collected  
[35:14] Charge balance equation is out by -261.3%  
[35:14] Stirrer speed set to 50  
[35:19] pH 9.03 -> 9.23  
[35:19] Using cautious pH adjust  
[35:19] Dispensed 0.000024 mL of Base (0.5 M KOH)  
[35:24] Stepping pH = 9.03  
[35:24] Dispensed 0.000118 mL of Base (0.5 M KOH)  
[35:29] Stepping pH = 9.41  
[35:44] Stirrer speed set to 0  
[36:00] Datapoint id 28 collected  
[36:00] Charge balance equation is out by -201.0%  
[36:00] Stirrer speed set to 50  
[36:05] pH 9.42 -> 9.62  
[36:05] Using cautious pH adjust  
[36:05] Dispensed 0.000047 mL of Base (0.5 M KOH)  
[36:10] Stepping pH = 9.44  
[36:10] Dispensed 0.000141 mL of Base (0.5 M KOH)  
[36:15] Stepping pH = 9.72  
[36:30] Stirrer speed set to 0  
[36:52] Datapoint id 29 collected  
[36:52] Charge balance equation is out by -86.2%  
[36:52] Stirrer speed set to 50  
[36:57] pH 9.73 -> 9.93  
[36:57] Using cautious pH adjust  
[36:57] Dispensed 0.000094 mL of Base (0.5 M KOH)  
[37:02] Stepping pH = 9.79  
[37:02] Dispensed 0.000094 mL of Base (0.5 M KOH)  
[37:07] Stepping pH = 9.92  
[37:07] Dispensed 0.000024 mL of Base (0.5 M KOH)  
[37:12] Stepping pH = 9.93  
[37:28] Stirrer speed set to 0  
[37:40] Datapoint id 30 collected  
[37:40] Charge balance equation is out by -22.0%  
[37:40] Stirrer speed set to 50  
[37:45] pH 9.92 -> 10.05  
[37:45] Using cautious pH adjust  
[37:45] Dispensed 0.000071 mL of Base (0.5 M KOH)  
[37:50] Stepping pH = 9.95  
[37:50] Dispensed 0.000118 mL of Base (0.5 M KOH)  
[37:56] Stepping pH = 10.06  
[38:11] Stirrer speed set to 0  
[38:21] Datapoint id 31 collected  
[38:21] Charge balance equation is out by -30.0%  
[38:21] Titration 2 of 3



Sample name: **M07\_octanol**  
Assay name: **pH-metric high logP**  
Assay ID: **18B-28013**  
Filename: **C:\Sirius\_T3\Mehtap\20180228\_exp28\_logP\_T3-2\18B-28013\_M07\_octanol\_pH-metric high logP.t3r**

Experiment start time: **2/28/2018 7:21:13 PM**  
Analyst: **Pion**  
Instrument ID: **T312060**

## Experiment Log (continued)

[38:21] Adding initial titrants  
[38:21] Automatically add 0.05000 mL of Octanol  
[38:23] Dispensed 0.050000 mL of Octanol  
[38:23] Stirrer speed set to 10  
[38:24] Stirrer speed set to 55  
[38:24] Iterative adjust 10.07 -> 2.00  
[38:24] pH 10.07 -> 2.00  
[38:25] Dispensed 0.055621 mL of Acid (0.5 M HCl)  
[38:30] pH 2.03 -> 2.00  
[38:30] Dispensed 0.003316 mL of Acid (0.5 M HCl)  
[39:21] Stirrer speed set to 0  
[39:31] Datapoint id 32 collected  
[39:31] Stirrer speed set to 55  
[39:36] pH 1.96 -> 2.16  
[39:36] Using cautious pH adjust  
[39:36] Dispensed 0.009313 mL of Base (0.5 M KOH)  
[39:41] Stepping pH = 2.06  
[39:41] Dispensed 0.005997 mL of Base (0.5 M KOH)  
[39:47] Stepping pH = 2.13  
[39:47] Dispensed 0.002023 mL of Base (0.5 M KOH)  
[39:52] Stepping pH = 2.16  
[40:07] Stirrer speed set to 0  
[40:17] Datapoint id 33 collected  
[40:17] Charge balance equation is out by 7.0%  
[40:17] Stirrer speed set to 55  
[40:22] pH 2.16 -> 2.36  
[40:22] Using charge balance adjust  
[40:22] Dispensed 0.011689 mL of Base (0.5 M KOH)  
[40:43] Stirrer speed set to 0  
[40:53] Datapoint id 34 collected  
[40:53] Charge balance equation is out by 15.3%  
[40:53] Stirrer speed set to 55  
[40:58] pH 2.40 -> 2.60  
[40:58] Using cautious pH adjust  
[40:58] Dispensed 0.003387 mL of Base (0.5 M KOH)  
[41:03] Stepping pH = 2.49  
[41:04] Dispensed 0.002446 mL of Base (0.5 M KOH)  
[41:09] Stepping pH = 2.57  
[41:09] Dispensed 0.000894 mL of Base (0.5 M KOH)  
[41:14] Stepping pH = 2.60  
[41:29] Stirrer speed set to 0  
[41:39] Datapoint id 35 collected  
[41:39] Charge balance equation is out by 0.8%  
[41:39] Stirrer speed set to 55  
[41:44] pH 2.60 -> 2.80  
[41:44] Using charge balance adjust  
[41:44] Dispensed 0.004351 mL of Base (0.5 M KOH)  
[42:05] Stirrer speed set to 0  
[42:15] Datapoint id 36 collected  
[42:15] Charge balance equation is out by 4.1%  
[42:15] Stirrer speed set to 55  
[42:20] pH 2.82 -> 3.02  
[42:20] Using charge balance adjust  
[42:20] Dispensed 0.002799 mL of Base (0.5 M KOH)  
[42:40] Stirrer speed set to 0  
[42:50] Datapoint id 37 collected  
[42:50] Charge balance equation is out by -3.5%  
[42:50] Stirrer speed set to 55  
[42:55] pH 3.02 -> 3.22

Sample name: **M07\_octanol**  
Assay name: **pH-metric high logP**  
Assay ID: **18B-28013**  
Filename: **C:\Sirius\_T3\Mehtap\20180228\_exp28\_logP\_T3-2\18B-28013\_M07\_octanol\_pH-metric high logP.t3r**

Experiment start time: **2/28/2018 7:21:13 PM**  
Analyst: **Pion**  
Instrument ID: **T312060**

## Experiment Log (continued)

[42:55] Using charge balance adjust  
[42:55] Dispensed 0.001976 mL of Base (0.5 M KOH)  
[43:16] Stirrer speed set to 0  
[43:26] Datapoint id 38 collected  
[43:26] Charge balance equation is out by 1.2%  
[43:26] Stirrer speed set to 55  
[43:31] pH 3.22 -> 3.42  
[43:31] Using charge balance adjust  
[43:31] Dispensed 0.001505 mL of Base (0.5 M KOH)  
[43:51] Stirrer speed set to 0  
[44:02] Datapoint id 39 collected  
[44:02] Charge balance equation is out by 33.9%  
[44:02] Stirrer speed set to 55  
[44:07] pH 3.50 -> 3.70  
[44:07] Using cautious pH adjust  
[44:07] Dispensed 0.000659 mL of Base (0.5 M KOH)  
[44:12] Stepping pH = 3.64  
[44:12] Dispensed 0.000235 mL of Base (0.5 M KOH)  
[44:17] Stepping pH = 3.69  
[44:32] Stirrer speed set to 0  
[44:42] Datapoint id 40 collected  
[44:42] Charge balance equation is out by 32.5%  
[44:42] Stirrer speed set to 55  
[44:47] pH 3.69 -> 3.89  
[44:47] Using cautious pH adjust  
[44:47] Dispensed 0.000659 mL of Base (0.5 M KOH)  
[44:52] Stepping pH = 3.82  
[44:52] Dispensed 0.000259 mL of Base (0.5 M KOH)  
[44:58] Stepping pH = 3.87  
[44:58] Dispensed 0.000094 mL of Base (0.5 M KOH)  
[45:03] Stepping pH = 3.89  
[45:18] Stirrer speed set to 0  
[45:28] Datapoint id 41 collected  
[45:28] Charge balance equation is out by 22.8%  
[45:28] Stirrer speed set to 55  
[45:33] pH 3.88 -> 4.08  
[45:33] Using cautious pH adjust  
[45:33] Dispensed 0.000682 mL of Base (0.5 M KOH)  
[45:38] Stepping pH = 4.00  
[45:38] Dispensed 0.000353 mL of Base (0.5 M KOH)  
[45:43] Stepping pH = 4.06  
[45:43] Dispensed 0.000141 mL of Base (0.5 M KOH)  
[45:49] Stepping pH = 4.08  
[46:04] Stirrer speed set to 0  
[46:14] Datapoint id 42 collected  
[46:14] Charge balance equation is out by 15.0%  
[46:14] Stirrer speed set to 55  
[46:19] pH 4.07 -> 4.27  
[46:19] Using cautious pH adjust  
[46:19] Dispensed 0.000682 mL of Base (0.5 M KOH)  
[46:24] Stepping pH = 4.18  
[46:24] Dispensed 0.000423 mL of Base (0.5 M KOH)  
[46:29] Stepping pH = 4.24  
[46:29] Dispensed 0.000212 mL of Base (0.5 M KOH)  
[46:34] Stepping pH = 4.27  
[46:49] Stirrer speed set to 0  
[46:59] Datapoint id 43 collected  
[46:59] Charge balance equation is out by 3.8%  
[46:59] Stirrer speed set to 55

Sample name: **M07\_octanol**  
Assay name: **pH-metric high logP**  
Assay ID: **18B-28013**  
Filename: **C:\Sirius\_T3\Mehtap\20180228\_exp28\_logP\_T3-2\18B-28013\_M07\_octanol\_pH-metric high logP.t3r**

Experiment start time: **2/28/2018 7:21:13 PM**  
Analyst: **Pion**  
Instrument ID: **T312060**

## Experiment Log (continued)

[47:04] pH 4.27 -> 4.47  
[47:04] Using charge balance adjust  
[47:05] Dispensed 0.001246 mL of Base (0.5 M KOH)  
[47:25] Stirrer speed set to 0  
[47:35] Datapoint id 44 collected  
[47:35] Charge balance equation is out by -14.4%  
[47:35] Stirrer speed set to 55  
[47:40] pH 4.44 -> 4.64  
[47:40] Using charge balance adjust  
[47:40] Dispensed 0.001105 mL of Base (0.5 M KOH)  
[48:00] Stirrer speed set to 0  
[48:11] Datapoint id 45 collected  
[48:11] Charge balance equation is out by -17.5%  
[48:11] Stirrer speed set to 55  
[48:16] pH 4.61 -> 4.81  
[48:16] Using cautious pH adjust  
[48:16] Dispensed 0.000447 mL of Base (0.5 M KOH)  
[48:21] Stepping pH = 4.69  
[48:21] Dispensed 0.000447 mL of Base (0.5 M KOH)  
[48:26] Stepping pH = 4.77  
[48:26] Dispensed 0.000165 mL of Base (0.5 M KOH)  
[48:31] Stepping pH = 4.80  
[48:47] Stirrer speed set to 0  
[48:57] Datapoint id 46 collected  
[48:57] Charge balance equation is out by -16.8%  
[48:57] Stirrer speed set to 55  
[49:02] pH 4.81 -> 5.01  
[49:02] Using cautious pH adjust  
[49:02] Dispensed 0.000353 mL of Base (0.5 M KOH)  
[49:07] Stepping pH = 4.89  
[49:08] Dispensed 0.000306 mL of Base (0.5 M KOH)  
[49:13] Stepping pH = 4.97  
[49:13] Dispensed 0.000094 mL of Base (0.5 M KOH)  
[49:18] Stepping pH = 4.99  
[49:18] Dispensed 0.000094 mL of Base (0.5 M KOH)  
[49:23] Stepping pH = 5.01  
[49:38] Stirrer speed set to 0  
[49:49] Datapoint id 47 collected  
[49:49] Charge balance equation is out by -19.3%  
[49:49] Stirrer speed set to 55  
[49:54] pH 5.01 -> 5.21  
[49:54] Using cautious pH adjust  
[49:54] Dispensed 0.000235 mL of Base (0.5 M KOH)  
[49:59] Stepping pH = 5.09  
[49:59] Dispensed 0.000235 mL of Base (0.5 M KOH)  
[50:04] Stepping pH = 5.19  
[50:04] Dispensed 0.000047 mL of Base (0.5 M KOH)  
[50:09] Stepping pH = 5.19  
[50:09] Dispensed 0.000141 mL of Base (0.5 M KOH)  
[50:14] Stepping pH = 5.25  
[50:29] Stirrer speed set to 0  
[50:40] Datapoint id 48 collected  
[50:40] Charge balance equation is out by -35.3%  
[50:40] Stirrer speed set to 55  
[50:46] pH 5.26 -> 5.46  
[50:46] Using cautious pH adjust  
[50:46] Dispensed 0.000165 mL of Base (0.5 M KOH)  
[50:51] Stepping pH = 5.33  
[50:51] Dispensed 0.000165 mL of Base (0.5 M KOH)

Sample name: **M07\_octanol**  
Assay name: **pH-metric high logP**  
Assay ID: **18B-28013**  
Filename: **C:\Sirius\_T3\Mehtap\20180228\_exp28\_logP\_T3-2\18B-28013\_M07\_octanol\_pH-metric high logP.t3r**

Experiment start time: **2/28/2018 7:21:13 PM**  
Analyst: **Pion**  
Instrument ID: **T312060**

## Experiment Log (continued)

[50:56] Stepping pH = 5.44  
[50:56] Dispensed 0.000024 mL of Base (0.5 M KOH)  
[51:01] Stepping pH = 5.44  
[51:01] Dispensed 0.000047 mL of Base (0.5 M KOH)  
[51:06] Stepping pH = 5.46  
[51:21] Stirrer speed set to 0  
[51:33] Datapoint id 49 collected  
[51:33] Charge balance equation is out by -26.8%  
[51:33] Stirrer speed set to 55  
[51:38] pH 5.48 -> 5.68  
[51:38] Using cautious pH adjust  
[51:38] Dispensed 0.000118 mL of Base (0.5 M KOH)  
[51:43] Stepping pH = 5.54  
[51:43] Dispensed 0.000118 mL of Base (0.5 M KOH)  
[51:48] Stepping pH = 5.64  
[51:48] Dispensed 0.000024 mL of Base (0.5 M KOH)  
[51:53] Stepping pH = 5.65  
[51:53] Dispensed 0.000024 mL of Base (0.5 M KOH)  
[51:58] Stepping pH = 5.67  
[52:14] Stirrer speed set to 0  
[52:27] Datapoint id 50 collected  
[52:27] Charge balance equation is out by -33.5%  
[52:27] Stirrer speed set to 55  
[52:32] pH 5.69 -> 5.89  
[52:32] Using cautious pH adjust  
[52:32] Dispensed 0.000071 mL of Base (0.5 M KOH)  
[52:37] Stepping pH = 5.75  
[52:37] Dispensed 0.000094 mL of Base (0.5 M KOH)  
[52:42] Stepping pH = 5.89  
[52:57] Stirrer speed set to 0  
[53:12] Datapoint id 51 collected  
[53:12] Charge balance equation is out by -9.3%  
[53:12] Stirrer speed set to 55  
[53:17] pH 5.91 -> 6.11  
[53:17] Using charge balance adjust  
[53:17] Dispensed 0.000118 mL of Base (0.5 M KOH)  
[53:37] Stirrer speed set to 0  
[54:02] Datapoint id 52 collected  
[54:02] Charge balance equation is out by -17.4%  
[54:02] Stirrer speed set to 55  
[54:07] pH 6.13 -> 6.33  
[54:07] Using cautious pH adjust  
[54:07] Dispensed 0.000047 mL of Base (0.5 M KOH)  
[54:12] Stepping pH = 6.17  
[54:12] Dispensed 0.000094 mL of Base (0.5 M KOH)  
[54:17] Stepping pH = 6.53  
[54:32] Stirrer speed set to 0  
[55:18] Datapoint id 53 collected  
[55:18] Charge balance equation is out by -53.9%  
[55:18] Stirrer speed set to 55  
[55:23] pH 6.56 -> 6.76  
[55:23] Using cautious pH adjust  
[55:23] Dispensed 0.000024 mL of Base (0.5 M KOH)  
[55:28] Stepping pH = 6.57  
[55:28] Dispensed 0.000071 mL of Base (0.5 M KOH)  
[55:33] Stepping pH = 6.85  
[55:48] Stirrer speed set to 0  
[56:48] Datapoint id 54 collected  
[56:48] Charge balance equation is out by -91.3%

Sample name: **M07\_octanol**  
Assay name: **pH-metric high logP**  
Assay ID: **18B-28013**  
Filename: **C:\Sirius\_T3\Mehtap\20180228\_exp28\_logP\_T3-2\18B-28013\_M07\_octanol\_pH-metric high logP.t3r**

Experiment start time: **2/28/2018 7:21:13 PM**  
Analyst: **Pion**  
Instrument ID: **T312060**

## Experiment Log (continued)

[56:48] Stirrer speed set to 55  
[56:53] pH 7.00 -> 7.20  
[56:53] Using cautious pH adjust  
[56:53] Dispensed 0.000024 mL of Base (0.5 M KOH)  
[56:58] Stepping pH = 7.03  
[56:58] Dispensed 0.000024 mL of Base (0.5 M KOH)  
[57:03] Stepping pH = 7.13  
[57:03] Dispensed 0.000024 mL of Base (0.5 M KOH)  
[57:09] Stepping pH = 7.33  
[57:24] Stirrer speed set to 0  
[58:24] Datapoint id 55 collected  
[58:24] Charge balance equation is out by -155.9%  
[58:24] Stirrer speed set to 55  
[58:29] pH 7.44 -> 7.64  
[58:29] Using cautious pH adjust  
[58:29] Dispensed 0.000024 mL of Base (0.5 M KOH)  
[58:34] Stepping pH = 7.50  
[58:34] Dispensed 0.000024 mL of Base (0.5 M KOH)  
[58:39] Stepping pH = 7.75  
[58:54] Stirrer speed set to 0  
[59:54] Datapoint id 56 collected  
[59:54] Charge balance equation is out by -253.5%  
[59:54] Stirrer speed set to 55  
[59:59] pH 7.87 -> 8.07  
[59:59] Using cautious pH adjust  
[59:59] Dispensed 0.000024 mL of Base (0.5 M KOH)  
[1:00:04] Stepping pH = 7.93  
[1:00:04] Dispensed 0.000024 mL of Base (0.5 M KOH)  
[1:00:10] Stepping pH = 8.14  
[1:00:25] Stirrer speed set to 0  
[1:01:25] Datapoint id 57 collected  
[1:01:25] Charge balance equation is out by -437.3%  
[1:01:25] Stirrer speed set to 55  
[1:01:30] pH 8.27 -> 8.47  
[1:01:30] Using cautious pH adjust  
[1:01:30] Dispensed 0.000024 mL of Base (0.5 M KOH)  
[1:01:35] Stepping pH = 8.31  
[1:01:35] Dispensed 0.000024 mL of Base (0.5 M KOH)  
[1:01:40] Stepping pH = 8.47  
[1:01:55] Stirrer speed set to 0  
[1:02:48] Datapoint id 58 collected  
[1:02:48] Charge balance equation is out by -280.7%  
[1:02:48] Stirrer speed set to 55  
[1:02:53] pH 8.50 -> 8.70  
[1:02:53] Using cautious pH adjust  
[1:02:53] Dispensed 0.000024 mL of Base (0.5 M KOH)  
[1:02:59] Stepping pH = 8.50  
[1:02:59] Dispensed 0.000024 mL of Base (0.5 M KOH)  
[1:03:04] Stepping pH = 8.60  
[1:03:04] Dispensed 0.000024 mL of Base (0.5 M KOH)  
[1:03:09] Stepping pH = 8.73  
[1:03:24] Stirrer speed set to 0  
[1:03:59] Datapoint id 59 collected  
[1:03:59] Charge balance equation is out by -300.8%  
[1:03:59] Stirrer speed set to 55  
[1:04:04] pH 8.78 -> 8.98  
[1:04:04] Using cautious pH adjust  
[1:04:04] Dispensed 0.000024 mL of Base (0.5 M KOH)  
[1:04:09] Stepping pH = 8.79

Sample name: **M07\_octanol**  
Assay name: **pH-metric high logP**  
Assay ID: **18B-28013**  
Filename: **C:\Sirius\_T3\Mehtap\20180228\_exp28\_logP\_T3-2\18B-28013\_M07\_octanol\_pH-metric high logP.t3r**

Experiment start time: **2/28/2018 7:21:13 PM**  
Analyst: **Pion**  
Instrument ID: **T312060**

## Experiment Log (continued)

[1:04:09] Dispensed 0.000047 mL of Base (0.5 M KOH)  
[1:04:14] Stepping pH = 8.94  
[1:04:15] Dispensed 0.000024 mL of Base (0.5 M KOH)  
[1:04:20] Stepping pH = 9.02  
[1:04:35] Stirrer speed set to 0  
[1:05:04] Datapoint id 60 collected  
[1:05:04] Charge balance equation is out by -188.4%  
[1:05:04] Stirrer speed set to 55  
[1:05:09] pH 9.05 -> 9.25  
[1:05:09] Using cautious pH adjust  
[1:05:09] Dispensed 0.000024 mL of Base (0.5 M KOH)  
[1:05:14] Stepping pH = 9.05  
[1:05:14] Dispensed 0.000071 mL of Base (0.5 M KOH)  
[1:05:19] Stepping pH = 9.21  
[1:05:19] Dispensed 0.000024 mL of Base (0.5 M KOH)  
[1:05:24] Stepping pH = 9.25  
[1:05:39] Stirrer speed set to 0  
[1:05:53] Datapoint id 61 collected  
[1:05:53] Charge balance equation is out by -138.2%  
[1:05:53] Stirrer speed set to 55  
[1:05:58] pH 9.25 -> 9.45  
[1:05:58] Using cautious pH adjust  
[1:05:58] Dispensed 0.000047 mL of Base (0.5 M KOH)  
[1:06:03] Stepping pH = 9.29  
[1:06:03] Dispensed 0.000071 mL of Base (0.5 M KOH)  
[1:06:08] Stepping pH = 9.42  
[1:06:08] Dispensed 0.000024 mL of Base (0.5 M KOH)  
[1:06:13] Stepping pH = 9.45  
[1:06:29] Stirrer speed set to 0  
[1:06:46] Datapoint id 62 collected  
[1:06:46] Charge balance equation is out by -77.2%  
[1:06:46] Stirrer speed set to 55  
[1:06:51] pH 9.45 -> 9.65  
[1:06:51] Using cautious pH adjust  
[1:06:51] Dispensed 0.000047 mL of Base (0.5 M KOH)  
[1:06:56] Stepping pH = 9.48  
[1:06:56] Dispensed 0.000118 mL of Base (0.5 M KOH)  
[1:07:01] Stepping pH = 9.56  
[1:07:01] Dispensed 0.000094 mL of Base (0.5 M KOH)  
[1:07:06] Stepping pH = 9.66  
[1:07:21] Stirrer speed set to 0  
[1:07:35] Datapoint id 63 collected  
[1:07:35] Charge balance equation is out by -136.0%  
[1:07:35] Stirrer speed set to 55  
[1:07:41] pH 9.66 -> 9.86  
[1:07:41] Using cautious pH adjust  
[1:07:41] Dispensed 0.000071 mL of Base (0.5 M KOH)  
[1:07:46] Stepping pH = 9.69  
[1:07:46] Dispensed 0.000165 mL of Base (0.5 M KOH)  
[1:07:51] Stepping pH = 9.86  
[1:08:06] Stirrer speed set to 0  
[1:08:17] Datapoint id 64 collected  
[1:08:17] Charge balance equation is out by -55.4%  
[1:08:17] Stirrer speed set to 55  
[1:08:22] pH 9.86 -> 10.05  
[1:08:22] Using cautious pH adjust  
[1:08:22] Dispensed 0.000118 mL of Base (0.5 M KOH)  
[1:08:27] Stepping pH = 9.92  
[1:08:27] Dispensed 0.000141 mL of Base (0.5 M KOH)



Sample name: **M07\_octanol**  
Assay name: **pH-metric high logP**  
Assay ID: **18B-28013**  
Filename: **C:\Sirius\_T3\Mehtap\20180228\_exp28\_logP\_T3-2\18B-28013\_M07\_octanol\_pH-metric high logP.t3r**

Experiment start time: **2/28/2018 7:21:13 PM**  
Analyst: **Pion**  
Instrument ID: **T312060**

## Experiment Log (continued)

[1:08:32] Stepping pH = 10.02  
[1:08:48] Stirrer speed set to 0  
[1:08:58] Datapoint id 65 collected  
[1:08:58] Charge balance equation is out by -13.4%  
[1:08:58] Titration 3 of 3  
[1:08:58] Adding initial titrants  
[1:08:58] Automatically add 0.25000 mL of Octanol  
[1:09:04] Dispensed 0.250000 mL of Octanol  
[1:09:04] Stirrer speed set to 10  
[1:09:05] Stirrer speed set to 60  
[1:09:05] Iterative adjust 10.02 -> 2.00  
[1:09:05] pH 10.02 -> 2.00  
[1:09:07] Dispensed 0.058702 mL of Acid (0.5 M HCl)  
[1:09:12] pH 2.04 -> 2.00  
[1:09:12] Dispensed 0.004139 mL of Acid (0.5 M HCl)  
[1:10:02] Stirrer speed set to 0  
[1:10:13] Datapoint id 66 collected  
[1:10:13] Stirrer speed set to 60  
[1:10:18] pH 1.96 -> 2.16  
[1:10:18] Using cautious pH adjust  
[1:10:18] Dispensed 0.010183 mL of Base (0.5 M KOH)  
[1:10:23] Stepping pH = 2.05  
[1:10:23] Dispensed 0.006632 mL of Base (0.5 M KOH)  
[1:10:29] Stepping pH = 2.13  
[1:10:29] Dispensed 0.001905 mL of Base (0.5 M KOH)  
[1:10:34] Stepping pH = 2.16  
[1:10:49] Stirrer speed set to 0  
[1:10:59] Datapoint id 67 collected  
[1:10:59] Charge balance equation is out by 8.1%  
[1:10:59] Stirrer speed set to 60  
[1:11:04] pH 2.16 -> 2.36  
[1:11:04] Using charge balance adjust  
[1:11:04] Dispensed 0.012841 mL of Base (0.5 M KOH)  
[1:11:25] Stirrer speed set to 0  
[1:11:35] Datapoint id 68 collected  
[1:11:35] Charge balance equation is out by 5.6%  
[1:11:35] Stirrer speed set to 60  
[1:11:40] pH 2.37 -> 2.57  
[1:11:40] Using charge balance adjust  
[1:11:40] Dispensed 0.007973 mL of Base (0.5 M KOH)  
[1:12:01] Stirrer speed set to 0  
[1:12:11] Datapoint id 69 collected  
[1:12:11] Charge balance equation is out by 9.9%  
[1:12:11] Stirrer speed set to 60  
[1:12:16] pH 2.60 -> 2.80  
[1:12:16] Using charge balance adjust  
[1:12:16] Dispensed 0.004962 mL of Base (0.5 M KOH)  
[1:12:36] Stirrer speed set to 0  
[1:12:46] Datapoint id 70 collected  
[1:12:46] Charge balance equation is out by -2.1%  
[1:12:46] Stirrer speed set to 60  
[1:12:51] pH 2.80 -> 3.00  
[1:12:51] Using charge balance adjust  
[1:12:52] Dispensed 0.003410 mL of Base (0.5 M KOH)  
[1:13:12] Stirrer speed set to 0  
[1:13:22] Datapoint id 71 collected  
[1:13:22] Charge balance equation is out by 7.6%  
[1:13:22] Stirrer speed set to 60  
[1:13:27] pH 3.02 -> 3.22

Sample name: **M07\_octanol**  
Assay name: **pH-metric high logP**  
Assay ID: **18B-28013**  
Filename: **C:\Sirius\_T3\Mehtap\20180228\_exp28\_logP\_T3-2\18B-28013\_M07\_octanol\_pH-metric high logP.t3r**

Experiment start time: **2/28/2018 7:21:13 PM**  
Analyst: **Pion**  
Instrument ID: **T312060**

## Experiment Log (continued)

[1:13:27] Using charge balance adjust  
[1:13:27] Dispensed 0.002516 mL of Base (0.5 M KOH)  
[1:13:47] Stirrer speed set to 0  
[1:13:58] Datapoint id 72 collected  
[1:13:58] Charge balance equation is out by 0.5%  
[1:13:58] Stirrer speed set to 60  
[1:14:03] pH 3.23 -> 3.43  
[1:14:03] Using charge balance adjust  
[1:14:03] Dispensed 0.002070 mL of Base (0.5 M KOH)  
[1:14:23] Stirrer speed set to 0  
[1:14:33] Datapoint id 73 collected  
[1:14:33] Charge balance equation is out by 1.7%  
[1:14:33] Stirrer speed set to 60  
[1:14:38] pH 3.43 -> 3.63  
[1:14:38] Using charge balance adjust  
[1:14:38] Dispensed 0.001834 mL of Base (0.5 M KOH)  
[1:14:59] Stirrer speed set to 0  
[1:15:09] Datapoint id 74 collected  
[1:15:09] Charge balance equation is out by 15.9%  
[1:15:09] Stirrer speed set to 60  
[1:15:14] pH 3.67 -> 3.87  
[1:15:14] Using cautious pH adjust  
[1:15:14] Dispensed 0.000800 mL of Base (0.5 M KOH)  
[1:15:19] Stepping pH = 3.78  
[1:15:19] Dispensed 0.000494 mL of Base (0.5 M KOH)  
[1:15:24] Stepping pH = 3.85  
[1:15:24] Dispensed 0.000141 mL of Base (0.5 M KOH)  
[1:15:29] Stepping pH = 3.87  
[1:15:44] Stirrer speed set to 0  
[1:15:54] Datapoint id 75 collected  
[1:15:54] Charge balance equation is out by 10.4%  
[1:15:54] Stirrer speed set to 60  
[1:16:00] pH 3.87 -> 4.07  
[1:16:00] Using charge balance adjust  
[1:16:00] Dispensed 0.001364 mL of Base (0.5 M KOH)  
[1:16:20] Stirrer speed set to 0  
[1:16:30] Datapoint id 76 collected  
[1:16:30] Charge balance equation is out by -1.5%  
[1:16:30] Stirrer speed set to 60  
[1:16:35] pH 4.07 -> 4.27  
[1:16:35] Using charge balance adjust  
[1:16:36] Dispensed 0.001082 mL of Base (0.5 M KOH)  
[1:16:56] Stirrer speed set to 0  
[1:17:12] Datapoint id 77 collected  
[1:17:12] Charge balance equation is out by -15.8%  
[1:17:12] Stirrer speed set to 60  
[1:17:17] pH 4.24 -> 4.44  
[1:17:17] Using cautious pH adjust  
[1:17:18] Dispensed 0.000423 mL of Base (0.5 M KOH)  
[1:17:23] Stepping pH = 4.31  
[1:17:23] Dispensed 0.000423 mL of Base (0.5 M KOH)  
[1:17:28] Stepping pH = 4.39  
[1:17:28] Dispensed 0.000212 mL of Base (0.5 M KOH)  
[1:17:33] Stepping pH = 4.43  
[1:17:48] Stirrer speed set to 0  
[1:17:58] Datapoint id 78 collected  
[1:17:58] Charge balance equation is out by -24.6%  
[1:17:58] Stirrer speed set to 60  
[1:18:03] pH 4.44 -> 4.64



Sample name: **M07\_octanol**  
Assay name: **pH-metric high logP**  
Assay ID: **18B-28013**  
Filename: **C:\Sirius\_T3\Mehtap\20180228\_exp28\_logP\_T3-2\18B-28013\_M07\_octanol\_pH-metric high logP.t3r**

Experiment start time: **2/28/2018 7:21:13 PM**  
Analyst: **Pion**  
Instrument ID: **T312060**

## Experiment Log (continued)

[1:18:03] Using cautious pH adjust  
[1:18:03] Dispensed 0.000306 mL of Base (0.5 M KOH)  
[1:18:08] Stepping pH = 4.51  
[1:18:09] Dispensed 0.000306 mL of Base (0.5 M KOH)  
[1:18:14] Stepping pH = 4.60  
[1:18:14] Dispensed 0.000094 mL of Base (0.5 M KOH)  
[1:18:19] Stepping pH = 4.61  
[1:18:19] Dispensed 0.000118 mL of Base (0.5 M KOH)  
[1:18:24] Stepping pH = 4.65  
[1:18:39] Stirrer speed set to 0  
[1:18:50] Datapoint id 79 collected  
[1:18:50] Charge balance equation is out by -33.9%  
[1:18:50] Stirrer speed set to 60  
[1:18:55] pH 4.66 -> 4.86  
[1:18:55] Using cautious pH adjust  
[1:18:55] Dispensed 0.000212 mL of Base (0.5 M KOH)  
[1:19:00] Stepping pH = 4.74  
[1:19:00] Dispensed 0.000188 mL of Base (0.5 M KOH)  
[1:19:05] Stepping pH = 4.82  
[1:19:05] Dispensed 0.000071 mL of Base (0.5 M KOH)  
[1:19:10] Stepping pH = 4.84  
[1:19:10] Dispensed 0.000071 mL of Base (0.5 M KOH)  
[1:19:15] Stepping pH = 4.86  
[1:19:31] Stirrer speed set to 0  
[1:19:41] Datapoint id 80 collected  
[1:19:41] Charge balance equation is out by -26.0%  
[1:19:41] Stirrer speed set to 60  
[1:19:46] pH 4.87 -> 5.07  
[1:19:46] Using cautious pH adjust  
[1:19:46] Dispensed 0.000141 mL of Base (0.5 M KOH)  
[1:19:51] Stepping pH = 4.95  
[1:19:51] Dispensed 0.000118 mL of Base (0.5 M KOH)  
[1:19:56] Stepping pH = 5.02  
[1:19:56] Dispensed 0.000047 mL of Base (0.5 M KOH)  
[1:20:02] Stepping pH = 5.05  
[1:20:02] Dispensed 0.000047 mL of Base (0.5 M KOH)  
[1:20:07] Stepping pH = 5.08  
[1:20:22] Stirrer speed set to 0  
[1:20:32] Datapoint id 81 collected  
[1:20:32] Charge balance equation is out by -32.6%  
[1:20:32] Stirrer speed set to 60  
[1:20:37] pH 5.09 -> 5.29  
[1:20:37] Using cautious pH adjust  
[1:20:38] Dispensed 0.000094 mL of Base (0.5 M KOH)  
[1:20:43] Stepping pH = 5.15  
[1:20:43] Dispensed 0.000118 mL of Base (0.5 M KOH)  
[1:20:48] Stepping pH = 5.29  
[1:21:03] Stirrer speed set to 0  
[1:21:14] Datapoint id 82 collected  
[1:21:14] Charge balance equation is out by -12.9%  
[1:21:14] Stirrer speed set to 60  
[1:21:20] pH 5.30 -> 5.50  
[1:21:20] Using charge balance adjust  
[1:21:20] Dispensed 0.000118 mL of Base (0.5 M KOH)  
[1:21:40] Stirrer speed set to 0  
[1:21:51] Datapoint id 83 collected  
[1:21:51] Charge balance equation is out by -30.6%  
[1:21:51] Stirrer speed set to 60  
[1:21:56] pH 5.46 -> 5.66

Sample name: **M07\_octanol**  
Assay name: **pH-metric high logP**  
Assay ID: **18B-28013**  
Filename: **C:\Sirius\_T3\Mehtap\20180228\_exp28\_logP\_T3-2\18B-28013\_M07\_octanol\_pH-metric high logP.t3r**

Experiment start time: **2/28/2018 7:21:13 PM**  
Analyst: **Pion**  
Instrument ID: **T312060**

## Experiment Log (continued)

[1:21:56] Using cautious pH adjust  
[1:21:57] Dispensed 0.000047 mL of Base (0.5 M KOH)  
[1:22:02] Stepping pH = 5.50  
[1:22:02] Dispensed 0.000094 mL of Base (0.5 M KOH)  
[1:22:07] Stepping pH = 5.75  
[1:22:22] Stirrer speed set to 0  
[1:22:38] Datapoint id 84 collected  
[1:22:38] Charge balance equation is out by -42.0%  
[1:22:38] Stirrer speed set to 60  
[1:22:43] pH 5.77 -> 5.97  
[1:22:43] Using cautious pH adjust  
[1:22:44] Dispensed 0.000024 mL of Base (0.5 M KOH)  
[1:22:49] Stepping pH = 5.77  
[1:22:49] Dispensed 0.000165 mL of Base (0.5 M KOH)  
[1:22:54] Stepping pH = 6.64  
[1:23:09] Stirrer speed set to 0  
[1:24:09] Datapoint id 85 collected  
[1:24:09] Charge balance equation is out by -201.0%  
[1:24:09] Stirrer speed set to 60  
[1:24:14] pH 6.65 -> 6.85  
[1:24:14] Using cautious pH adjust  
[1:24:14] Dispensed 0.000024 mL of Base (0.5 M KOH)  
[1:24:19] Stepping pH = 6.68  
[1:24:19] Dispensed 0.000047 mL of Base (0.5 M KOH)  
[1:24:24] Stepping pH = 6.82  
[1:24:24] Dispensed 0.000024 mL of Base (0.5 M KOH)  
[1:24:30] Stepping pH = 6.97  
[1:24:45] Stirrer speed set to 0  
[1:25:45] Datapoint id 86 collected  
[1:25:45] Charge balance equation is out by -106.3%  
[1:25:45] Stirrer speed set to 60  
[1:25:50] pH 7.10 -> 7.30  
[1:25:50] Using cautious pH adjust  
[1:25:50] Dispensed 0.000024 mL of Base (0.5 M KOH)  
[1:25:55] Stepping pH = 7.14  
[1:25:55] Dispensed 0.000024 mL of Base (0.5 M KOH)  
[1:26:00] Stepping pH = 7.29  
[1:26:15] Stirrer speed set to 0  
[1:27:15] Datapoint id 87 collected  
[1:27:15] Charge balance equation is out by -76.1%  
[1:27:15] Stirrer speed set to 60  
[1:27:20] pH 7.31 -> 7.51  
[1:27:20] Using cautious pH adjust  
[1:27:20] Dispensed 0.000024 mL of Base (0.5 M KOH)  
[1:27:25] Stepping pH = 7.39  
[1:27:25] Dispensed 0.000024 mL of Base (0.5 M KOH)  
[1:27:31] Stepping pH = 7.60  
[1:27:46] Stirrer speed set to 0  
[1:28:46] Datapoint id 88 collected  
[1:28:46] Charge balance equation is out by -151.3%  
[1:28:46] Stirrer speed set to 60  
[1:28:51] pH 7.53 -> 7.73  
[1:28:51] Using cautious pH adjust  
[1:28:51] Dispensed 0.000024 mL of Base (0.5 M KOH)  
[1:28:56] Stepping pH = 7.52  
[1:28:56] Dispensed 0.000024 mL of Base (0.5 M KOH)  
[1:29:01] Stepping pH = 7.53  
[1:29:01] Dispensed 0.000094 mL of Base (0.5 M KOH)  
[1:29:06] Stepping pH = 7.58

Sample name: **M07\_octanol**  
 Assay name: **pH-metric high logP**  
 Assay ID: **18B-28013**  
 Filename: **C:\Sirius\_T3\Mehtap\20180228\_exp28\_logP\_T3-2\18B-28013\_M07\_octanol\_pH-metric high logP.t3r**

Experiment start time: **2/28/2018 7:21:13 PM**  
 Analyst: **Pion**  
 Instrument ID: **T312060**

## Experiment Log (continued)

[1:29:06] Dispensed 0.000141 mL of Base (0.5 M KOH)  
 [1:29:11] Stepping pH = 8.69  
 [1:29:26] Stirrer speed set to 0  
 [1:30:22] Datapoint id 89 collected  
 [1:30:22] Charge balance equation is out by -2,279.8%  
 [1:30:22] Stirrer speed set to 60  
 [1:30:27] pH 8.69 -> 8.89  
 [1:30:27] Using cautious pH adjust  
 [1:30:27] Dispensed 0.000024 mL of Base (0.5 M KOH)  
 [1:30:32] Stepping pH = 8.69  
 [1:30:32] Dispensed 0.000047 mL of Base (0.5 M KOH)  
 [1:30:37] Stepping pH = 8.71  
 [1:30:37] Dispensed 0.000094 mL of Base (0.5 M KOH)  
 [1:30:42] Stepping pH = 9.03  
 [1:30:57] Stirrer speed set to 0  
 [1:31:14] Datapoint id 90 collected  
 [1:31:14] Charge balance equation is out by -541.2%  
 [1:31:14] Stirrer speed set to 60  
 [1:31:19] pH 9.03 -> 9.23  
 [1:31:19] Using cautious pH adjust  
 [1:31:19] Dispensed 0.000024 mL of Base (0.5 M KOH)  
 [1:31:24] Stepping pH = 9.03  
 [1:31:24] Dispensed 0.000071 mL of Base (0.5 M KOH)  
 [1:31:29] Stepping pH = 9.14  
 [1:31:29] Dispensed 0.000047 mL of Base (0.5 M KOH)  
 [1:31:34] Stepping pH = 9.21  
 [1:31:34] Dispensed 0.000024 mL of Base (0.5 M KOH)  
 [1:31:39] Stepping pH = 9.24  
 [1:31:55] Stirrer speed set to 0  
 [1:32:08] Datapoint id 91 collected  
 [1:32:08] Charge balance equation is out by -236.4%  
 [1:32:08] Stirrer speed set to 60  
 [1:32:13] pH 9.26 -> 9.46  
 [1:32:13] Using cautious pH adjust  
 [1:32:13] Dispensed 0.000047 mL of Base (0.5 M KOH)  
 [1:32:18] Stepping pH = 9.29  
 [1:32:18] Dispensed 0.000094 mL of Base (0.5 M KOH)  
 [1:32:23] Stepping pH = 9.46  
 [1:32:38] Stirrer speed set to 0  
 [1:32:52] Datapoint id 92 collected  
 [1:32:52] Charge balance equation is out by -62.5%  
 [1:32:52] Stirrer speed set to 60  
 [1:32:57] pH 9.48 -> 9.68  
 [1:32:57] Using cautious pH adjust  
 [1:32:57] Dispensed 0.000071 mL of Base (0.5 M KOH)  
 [1:33:02] Stepping pH = 9.50  
 [1:33:02] Dispensed 0.000165 mL of Base (0.5 M KOH)  
 [1:33:07] Stepping pH = 9.70  
 [1:33:22] Stirrer speed set to 0  
 [1:33:34] Datapoint id 93 collected  
 [1:33:34] Charge balance equation is out by -82.3%  
 [1:33:34] Stirrer speed set to 60  
 [1:33:39] pH 9.71 -> 9.91  
 [1:33:39] Using cautious pH adjust  
 [1:33:39] Dispensed 0.000094 mL of Base (0.5 M KOH)  
 [1:33:44] Stepping pH = 9.76  
 [1:33:44] Dispensed 0.000141 mL of Base (0.5 M KOH)  
 [1:33:49] Stepping pH = 9.90  
 [1:34:04] Stirrer speed set to 0



|              |                                                                                                   |                        |                             |
|--------------|---------------------------------------------------------------------------------------------------|------------------------|-----------------------------|
| Sample name: | <b>M07_octanol</b>                                                                                | Experiment start time: | <b>2/28/2018 7:21:13 PM</b> |
| Assay name:  | <b>pH-metric high logP</b>                                                                        | Analyst:               | <b>Pion</b>                 |
| Assay ID:    | <b>18B-28013</b>                                                                                  | Instrument ID:         | <b>T312060</b>              |
| Filename:    | <b>C:\Sirius_T3\Mehtap\20180228_exp28_logP_T3-2\18B-28013_M07_octanol_pH-metric high logP.t3r</b> |                        |                             |

---

**Experiment Log (continued)**

[1:34:15] Datapoint id 94 collected  
[1:34:15] Charge balance equation is out by -20.8%  
[1:34:15] Stirrer speed set to 60  
[1:34:20] pH 9.90 -> 10.05  
[1:34:20] Using cautious pH adjust  
[1:34:20] Dispensed 0.000094 mL of Base (0.5 M KOH)  
[1:34:25] Stepping pH = 9.94  
[1:34:25] Dispensed 0.000141 mL of Base (0.5 M KOH)  
[1:34:30] Stepping pH = 10.03  
[1:34:45] Stirrer speed set to 0  
[1:34:55] Datapoint id 95 collected  
[1:34:55] Charge balance equation is out by -25.1%  
[1:34:55] Argon flow rate set to 0  
[1:34:59] Titrator arm moved over Titration position

---
