# Supplementary material for: Octanol-water partition coefficient measurements for the SAMPL6 Blind Prediction Challenge
Source: bioRxiv or medRxiv preprint supplement (doi:10.1101/757393), 2019-12-02
Supplement: Supplementary file [file media-2.zip]

Sample name: **M04\_octanol**  
 Assay name: **pH-metric high logP**  
 Assay ID: **18C-24003**  
 Filename: **C:\Sirius\_T3\Mehtap\20180323\_exp33\_logP\_T3-2\18C-24003\_M04\_octanol\_pH-metric high logP.t3r**

Experiment start time: **3/24/2018 2:50:31 AM**  
 Analyst: **Dorothy Levorse**  
 Instrument ID: **T312060**

## pH-metric Result

logP (XH +) 0.87 ±0.03 (n=50)  
 logP (neutral X) 3.95 ±0.01 (n=50)  
 RMSD 0.342

## 18C-24003 Points 1 to 26

M04\_octanol concentration factor 0.985  
 Carbonate 0.1126 mM  
 Acidity error 0.07154 mM

## 18C-24003 Points 27 to 52

M04\_octanol concentration factor 0.875  
 Carbonate 0.1064 mM  
 Acidity error -0.19519 mM

## 18C-24003 Points 53 to 77

M04\_octanol concentration factor 0.960  
 Carbonate 0.1188 mM  
 Acidity error 0.08198 mM

## Warnings and errors

Errors None  
 Warnings None

## Sample logD and percent species

| pH     | M04_octanol<br>logD | M04_octanol<br>M04_octanolH | M04_octanol<br>M04_octanol | M04_octanol<br>M04_octanolH* | M04_octanol<br>M04_octanol* | Comment    |
|--------|---------------------|-----------------------------|----------------------------|------------------------------|-----------------------------|------------|
| 1.000  | 0.88                | 11.71 %                     | 0.00 %                     | 87.17 %                      | 1.12 %                      | Stomach pH |
| 1.200  | 0.88                | 11.63 %                     | 0.00 %                     | 86.60 %                      | 1.77 %                      |            |
| 2.000  | 0.92                | 10.63 %                     | 0.00 %                     | 79.16 %                      | 10.20 %                     |            |
| 3.000  | 1.23                | 5.54 %                      | 0.01 %                     | 41.26 %                      | 53.19 %                     |            |
| 4.000  | 2.01                | 0.96 %                      | 0.01 %                     | 7.13 %                       | 91.90 %                     | Blood pH   |
| 5.000  | 2.94                | 0.10 %                      | 0.01 %                     | 0.77 %                       | 99.12 %                     |            |
| 6.000  | 3.67                | 0.01 %                      | 0.01 %                     | 0.08 %                       | 99.90 %                     |            |
| 6.500  | 3.84                | 0.00 %                      | 0.01 %                     | 0.02 %                       | 99.96 %                     |            |
| 7.000  | 3.91                | 0.00 %                      | 0.01 %                     | 0.01 %                       | 99.98 %                     |            |
| 7.400  | 3.94                | 0.00 %                      | 0.01 %                     | 0.00 %                       | 99.99 %                     |            |
| 8.000  | 3.95                | 0.00 %                      | 0.01 %                     | 0.00 %                       | 99.99 %                     |            |
| 9.000  | 3.95                | 0.00 %                      | 0.01 %                     | 0.00 %                       | 99.99 %                     |            |
| 10.000 | 3.95                | 0.00 %                      | 0.01 %                     | 0.00 %                       | 99.99 %                     |            |
| 11.000 | 3.95                | 0.00 %                      | 0.01 %                     | 0.00 %                       | 99.99 %                     |            |
| 12.000 | 3.95                | 0.00 %                      | 0.01 %                     | 0.00 %                       | 99.99 %                     |            |

Sample name: **M04\_octanol**  
 Assay name: **pH-metric high logP**  
 Assay ID: **18C-24003**  
 Filename: **C:\Sirius\_T3\Mehtap\20180323\_exp33\_logP\_T3-2\18C-24003\_M04\_octanol\_pH-metric high logP.t3r**

Experiment start time: **3/24/2018 2:50:31 AM**  
 Analyst: **Dorothy Leverse**  
 Instrument ID: **T312060**

## Graphs

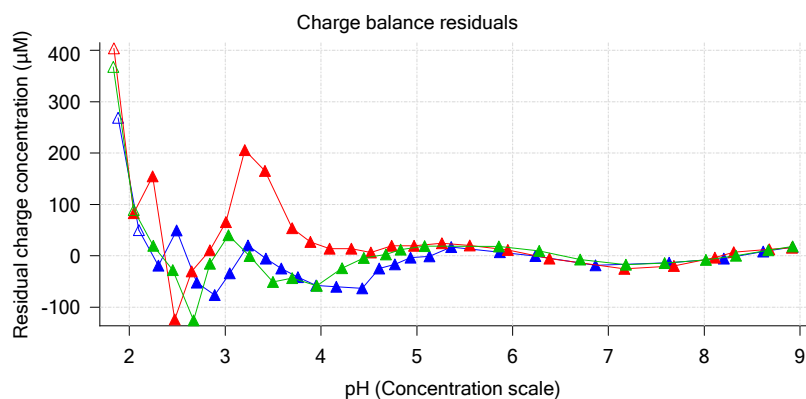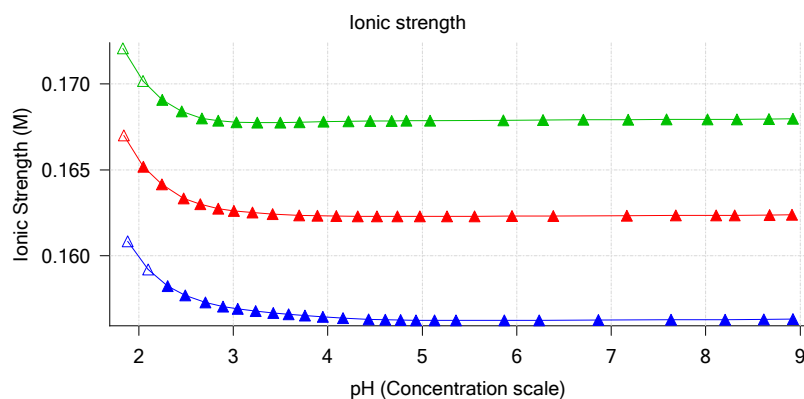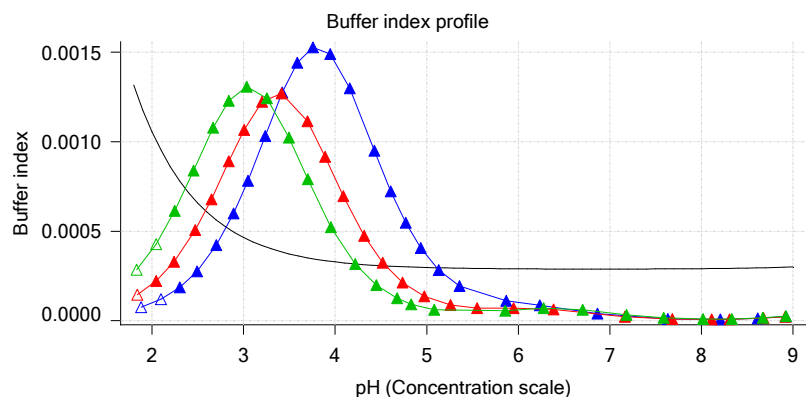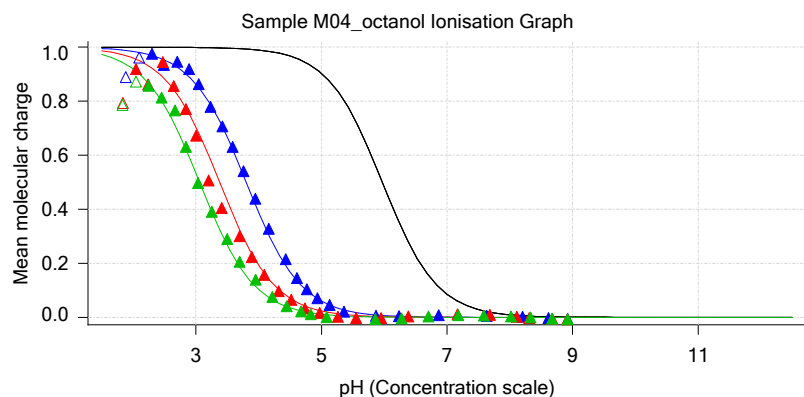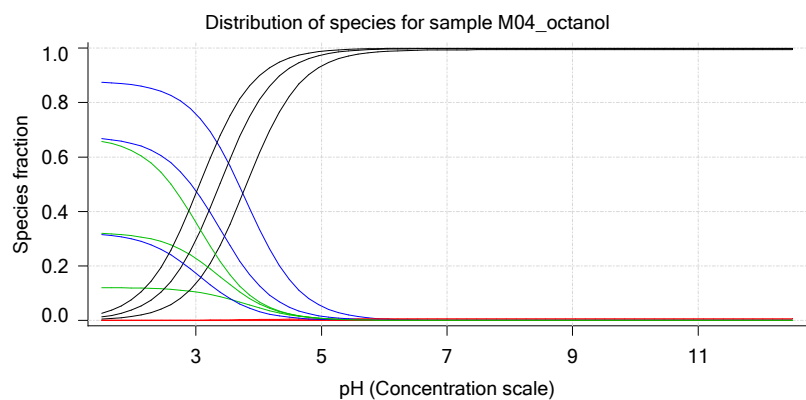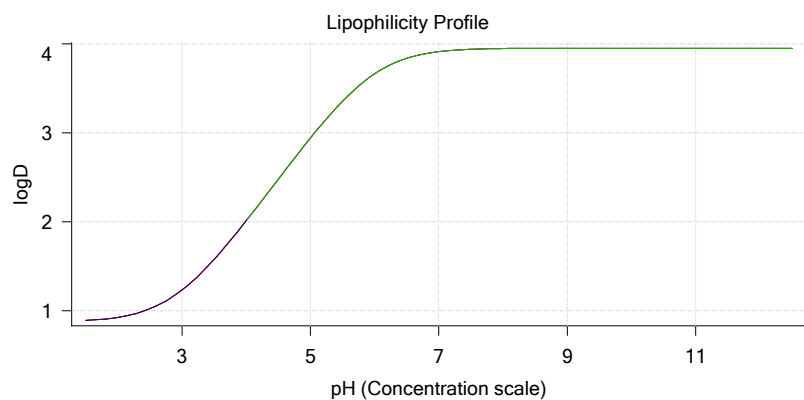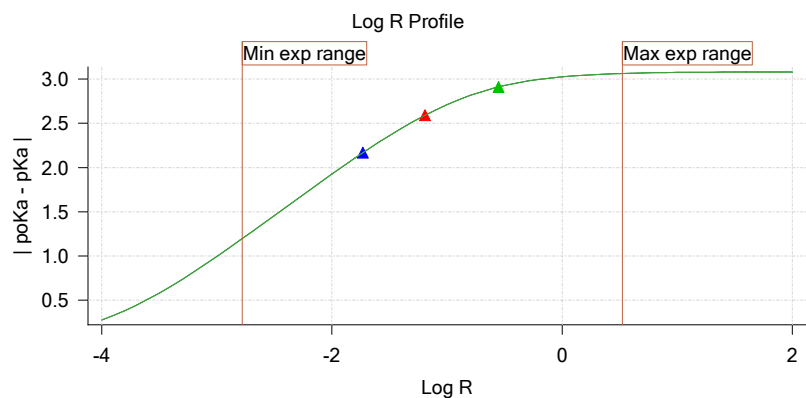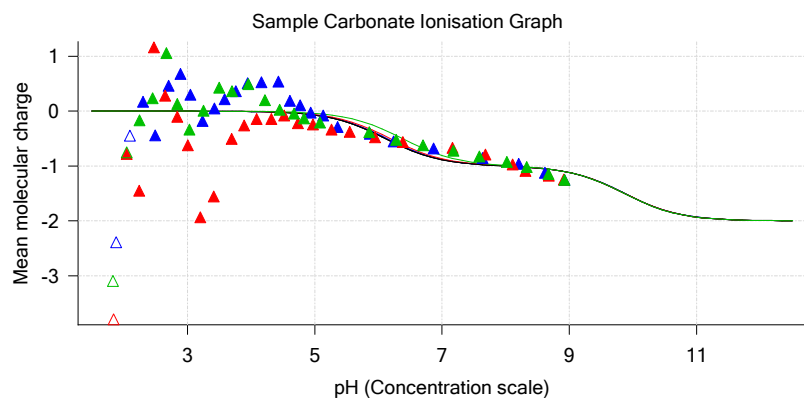

|              |                                                                                                   |                        |                             |
|--------------|---------------------------------------------------------------------------------------------------|------------------------|-----------------------------|
| Sample name: | <b>M04_octanol</b>                                                                                | Experiment start time: | <b>3/24/2018 2:50:31 AM</b> |
| Assay name:  | <b>pH-metric high logP</b>                                                                        | Analyst:               | <b>Dorothy Levorse</b>      |
| Assay ID:    | <b>18C-24003</b>                                                                                  | Instrument ID:         | <b>T312060</b>              |
| Filename:    | <b>C:\Sirius_T3\Mehtap\20180323_exp33_logP_T3-2\18C-24003_M04_octanol_pH-metric high logP.t3r</b> |                        |                             |

## Graphs (continued)

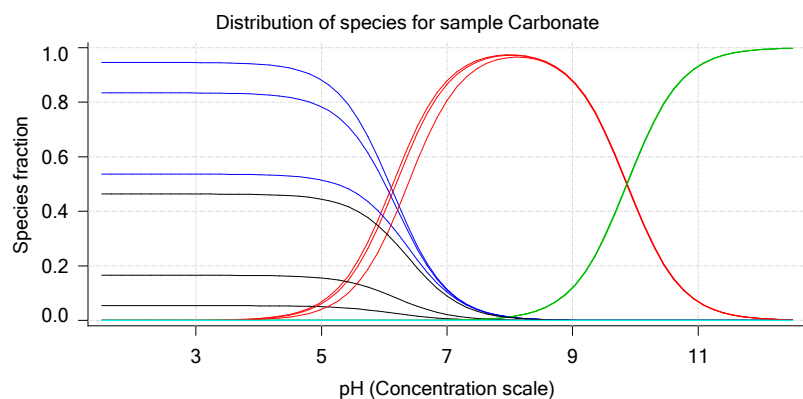

Sample name: **M04\_octanol**  
 Assay name: **pH-metric high logP**  
 Assay ID: **18C-24003**  
 Filename: **C:\Sirius\_T3\Mehtap\20180323\_exp33\_logP\_T3-2\18C-24003\_M04\_octanol\_pH-metric high logP.t3r**

Experiment start time: **3/24/2018 2:50:31 AM**  
 Analyst: **Dorothy Levorse**  
 Instrument ID: **T312060**

## pH-metric high logP Titration 1 of 3 18C-24003 Points 1 to 26

### Overall results

RMSD 0.279  
 Average ionic strength 0.157 M  
 Average temperature 24.9°C  
 Partition ratio 0.0186 : 1  
 Analyte concentration range 2638.8 µM to 2719.9 µM  
 Total points considered 24 of 26

### Warnings and errors

Errors None  
 Warnings None

### Four-Plus parameters

| Parameter | Value  | Date/Time            | File                      |
|-----------|--------|----------------------|---------------------------|
| Alpha     | 0.119  | 3/24/2018 2:50:31 AM | C:\Sirius_T3\HCl18C23.t3r |
| S         | 0.9972 | 3/24/2018 2:50:31 AM | C:\Sirius_T3\HCl18C23.t3r |
| jH        | 0.9    | 3/24/2018 2:50:31 AM | C:\Sirius_T3\HCl18C23.t3r |
| jOH       | -0.3   | 3/24/2018 2:50:31 AM | C:\Sirius_T3\HCl18C23.t3r |

### Titants

| Concentration | Value    | Date/Time            | File                      |
|---------------|----------|----------------------|---------------------------|
| 0.50 M HCl    | 0.997124 | 3/24/2018 2:50:31 AM | C:\Sirius_T3\HCl18C23.t3r |
| 0.50 M KOH    | 1.003190 | 3/24/2018 2:50:31 AM | C:\Sirius_T3\KOH18C23.t3r |

### Sample

|                                  |       |
|----------------------------------|-------|
| M04_octanol concentration factor | 0.985 |
| Base pKa 1                       | 5.97  |
| logP (XH +)                      | 0.19  |
| logP (neutral X)                 | 3.88  |

### Sample graphs

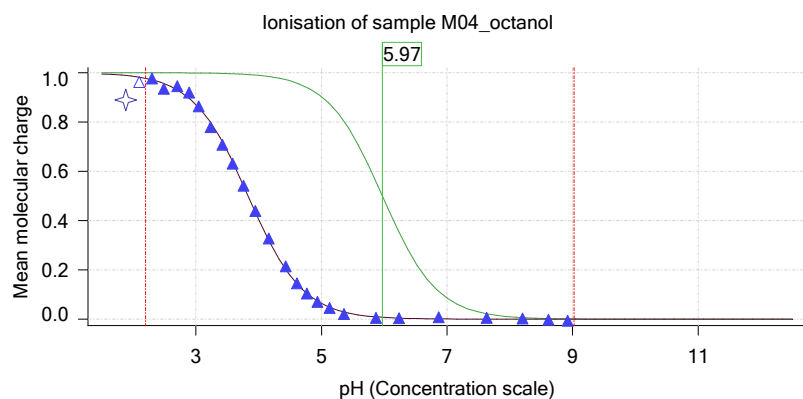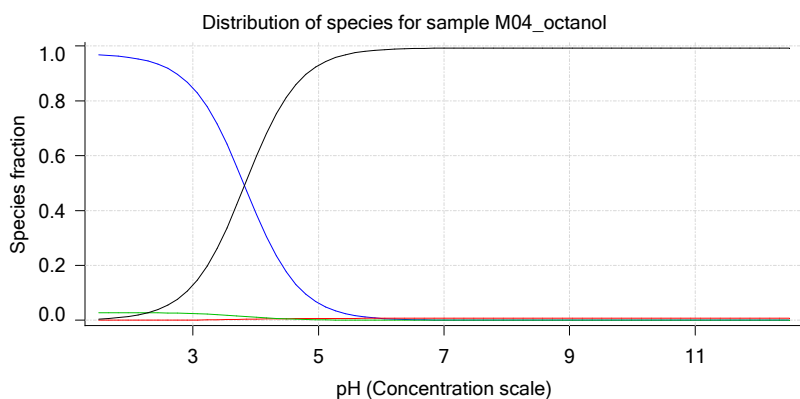

Sample name: **M04\_octanol**  
 Assay name: **pH-metric high logP**  
 Assay ID: **18C-24003**  
 Filename: **C:\Sirius\_T3\Mehtap\20180323\_exp33\_logP\_T3-2\18C-24003\_M04\_octanol\_pH-metric high logP.t3r**

Experiment start time: **3/24/2018 2:50:31 AM**  
 Analyst: **Dorothy Levorse**  
 Instrument ID: **T312060**

## Sample graphs (continued)

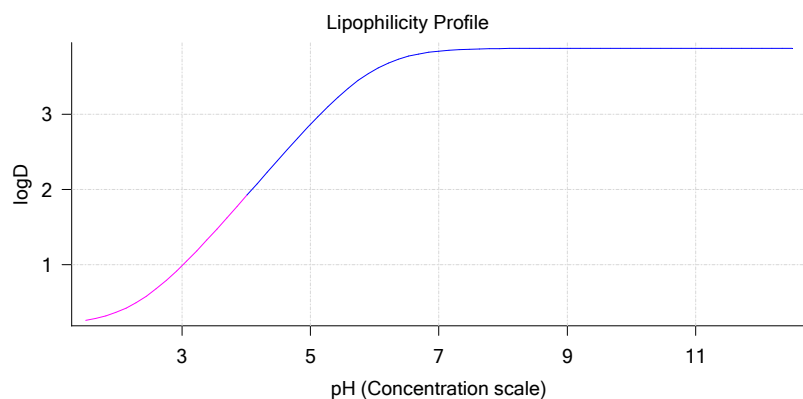

## Sample logD and percent species

| pH     | M04_octanol<br>logD | M04_octanol<br>M04_octanolH | M04_octanol<br>M04_octanolH | M04_octanol<br>M04_octanolH* | M04_octanol<br>M04_octanol* | Comment    |
|--------|---------------------|-----------------------------|-----------------------------|------------------------------|-----------------------------|------------|
| 1.000  | 0.21                | 97.06 %                     | 0.00 %                      | 2.79 %                       | 0.15 %                      | Stomach pH |
| 1.200  | 0.22                | 96.98 %                     | 0.00 %                      | 2.79 %                       | 0.23 %                      |            |
| 2.000  | 0.37                | 95.80 %                     | 0.01 %                      | 2.75 %                       | 1.44 %                      |            |
| 3.000  | 0.98                | 84.73 %                     | 0.09 %                      | 2.44 %                       | 12.75 %                     |            |
| 4.000  | 1.91                | 39.31 %                     | 0.42 %                      | 1.13 %                       | 59.14 %                     |            |
| 5.000  | 2.87                | 6.18 %                      | 0.66 %                      | 0.18 %                       | 92.98 %                     | Blood pH   |
| 6.000  | 3.59                | 0.66 %                      | 0.70 %                      | 0.02 %                       | 98.62 %                     |            |
| 6.500  | 3.77                | 0.21 %                      | 0.71 %                      | 0.01 %                       | 99.08 %                     |            |
| 7.000  | 3.84                | 0.07 %                      | 0.71 %                      | 0.00 %                       | 99.23 %                     |            |
| 7.400  | 3.86                | 0.03 %                      | 0.71 %                      | 0.00 %                       | 99.27 %                     |            |
| 8.000  | 3.87                | 0.01 %                      | 0.71 %                      | 0.00 %                       | 99.29 %                     |            |
| 9.000  | 3.88                | 0.00 %                      | 0.71 %                      | 0.00 %                       | 99.29 %                     |            |
| 10.000 | 3.88                | 0.00 %                      | 0.71 %                      | 0.00 %                       | 99.29 %                     |            |
| 11.000 | 3.88                | 0.00 %                      | 0.71 %                      | 0.00 %                       | 99.29 %                     |            |
| 12.000 | 3.88                | 0.00 %                      | 0.71 %                      | 0.00 %                       | 99.29 %                     |            |

## Carbonate and acidity

 Carbonate 0.113 mM  
 Acidity error 0.072 mM

## Other graphs

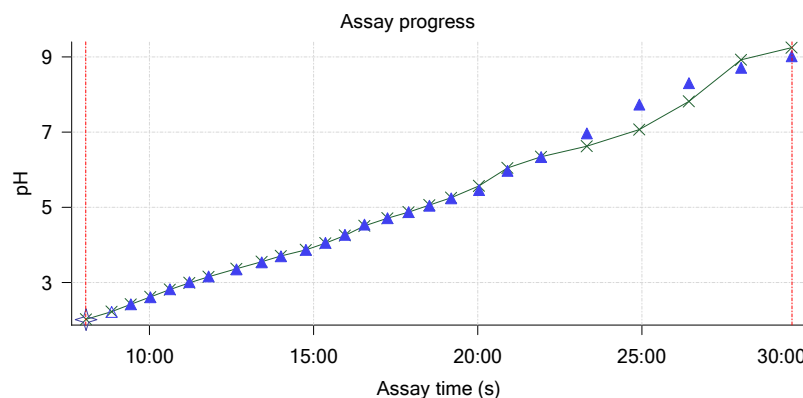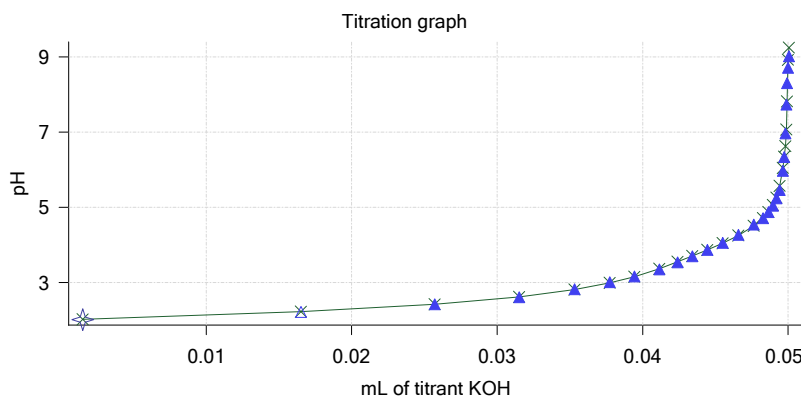

Sample name: **M04\_octanol**  
 Assay name: **pH-metric high logP**  
 Assay ID: **18C-24003**  
 Filename: **C:\Sirius\_T3\Mehtap\20180323\_exp33\_logP\_T3-2\18C-24003\_M04\_octanol\_pH-metric high logP.t3r**

Experiment start time: **3/24/2018 2:50:31 AM**  
 Analyst: **Dorothy Levorse**  
 Instrument ID: **T312060**

## Other graphs (continued)

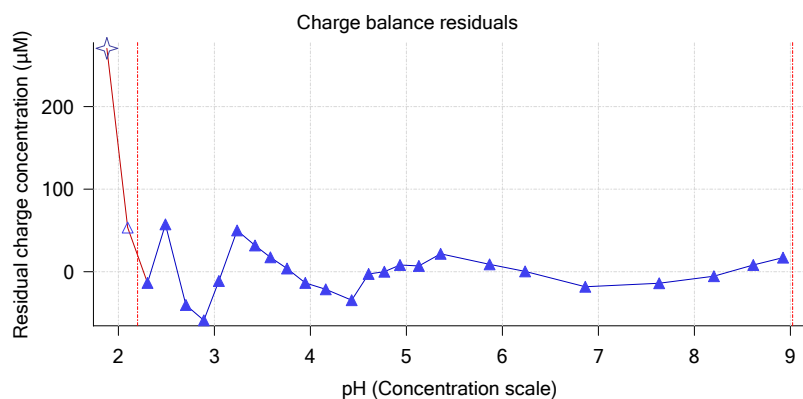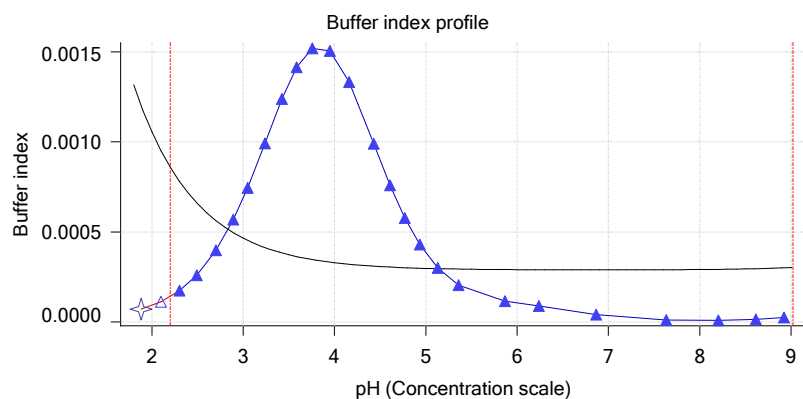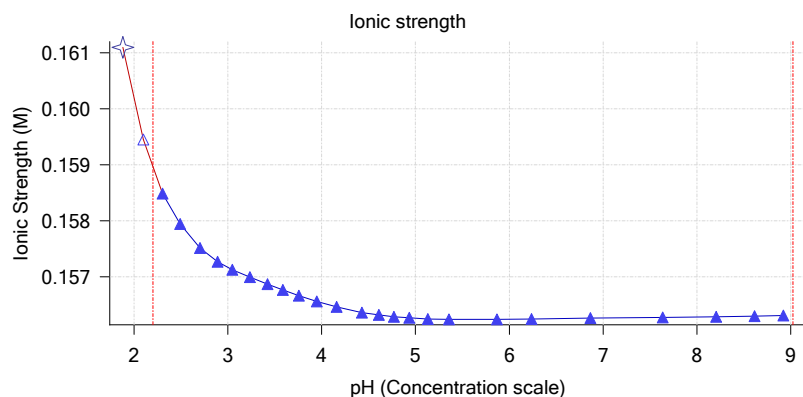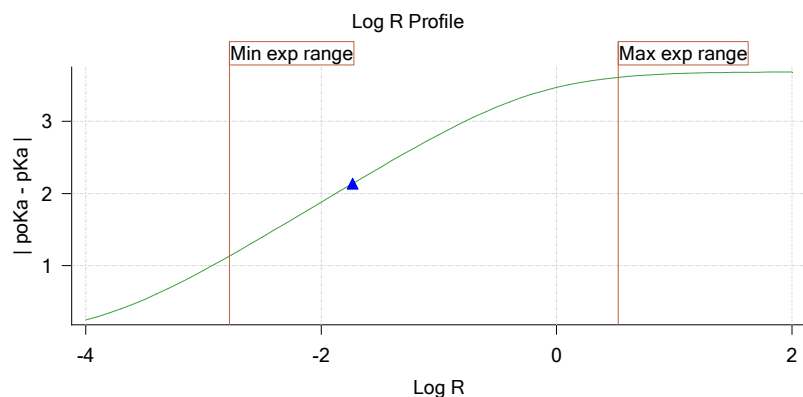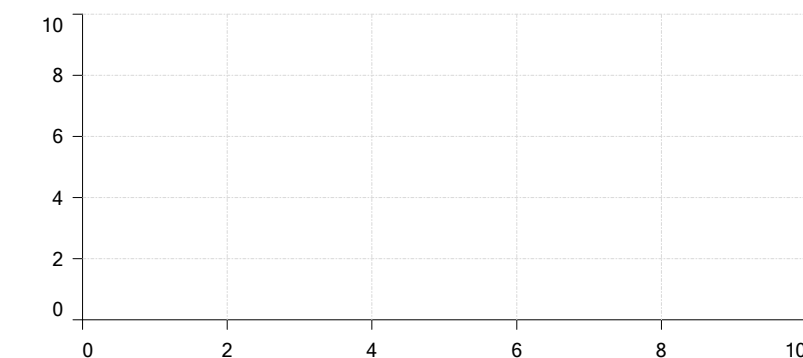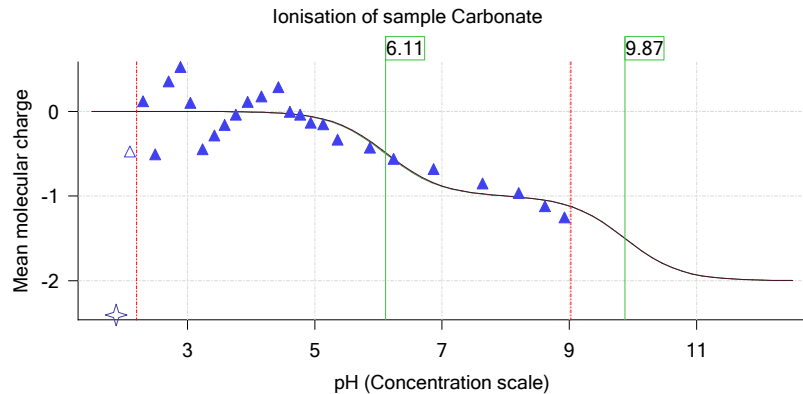

Sample name: **M04\_octanol**  
 Assay name: **pH-metric high logP**  
 Assay ID: **18C-24003**  
 Filename: **C:\Sirius\_T3\Mehtap\20180323\_exp33\_logP\_T3-2\18C-24003\_M04\_octanol\_pH-metric high logP.t3r**

Experiment start time: **3/24/2018 2:50:31 AM**  
 Analyst: **Dorothy Levorse**  
 Instrument ID: **T312060**

## pH-metric high logP Titration 2 of 3 18C-24003 Points 27 to 52

### Overall results

RMSD 0.447  
 Average ionic strength 0.163 M  
 Average temperature 25.0°C  
 Partition ratio 0.0643 : 1  
 Analyte concentration range 2363.9 µM to 2436.4 µM  
 Total points considered 25 of 26

### Warnings and errors

Errors None  
 Warnings None

### Four-Plus parameters

|                                                                                |       |        |                      |                           |
|--------------------------------------------------------------------------------|-------|--------|----------------------|---------------------------|
|  | Alpha | 0.119  | 3/24/2018 2:50:31 AM | C:\Sirius_T3\HCl18C23.t3r |
|  | S     | 0.9972 | 3/24/2018 2:50:31 AM | C:\Sirius_T3\HCl18C23.t3r |
|  | jH    | 0.9    | 3/24/2018 2:50:31 AM | C:\Sirius_T3\HCl18C23.t3r |
|  | jOH   | -0.3   | 3/24/2018 2:50:31 AM | C:\Sirius_T3\HCl18C23.t3r |

### Titrants

|                                                                                 |            |          |                      |                           |
|---------------------------------------------------------------------------------|------------|----------|----------------------|---------------------------|
|   | 0.50 M HCl | 0.997124 | 3/24/2018 2:50:31 AM | C:\Sirius_T3\HCl18C23.t3r |
|  | 0.50 M KOH | 1.003190 | 3/24/2018 2:50:31 AM | C:\Sirius_T3\KOH18C23.t3r |

### Sample

|                                                                                  |                                  |       |
|----------------------------------------------------------------------------------|----------------------------------|-------|
|  | M04_octanol concentration factor | 0.875 |
|  | Base pKa 1                       | 5.97  |
|  | logP (XH +)                      | 0.19  |
|  | logP (neutral X)                 | 3.90  |

### Sample graphs

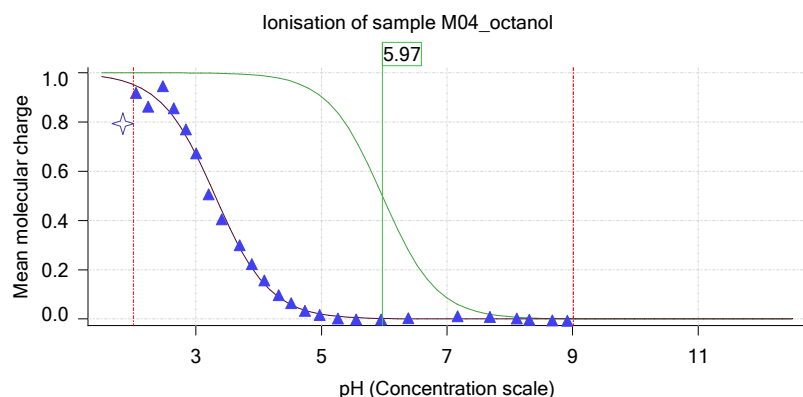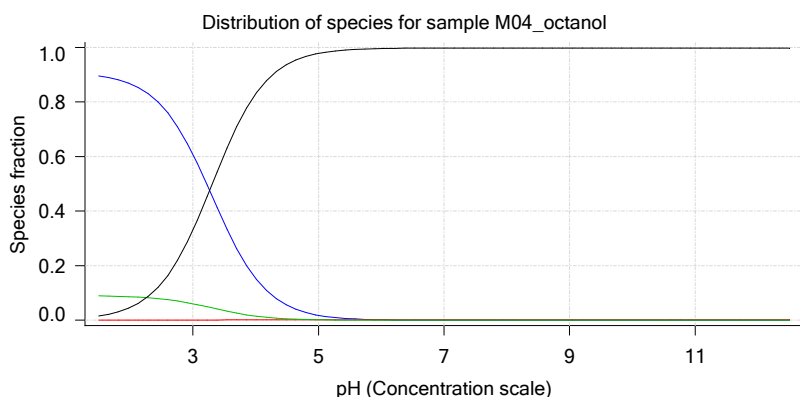

Sample name: **M04\_octanol**  
 Assay name: **pH-metric high logP**  
 Assay ID: **18C-24003**  
 Filename: **C:\Sirius\_T3\Mehtap\20180323\_exp33\_logP\_T3-2\18C-24003\_M04\_octanol\_pH-metric high logP.t3r**

Experiment start time: **3/24/2018 2:50:31 AM**  
 Analyst: **Dorothy Leverse**  
 Instrument ID: **T312060**

## Sample graphs (continued)

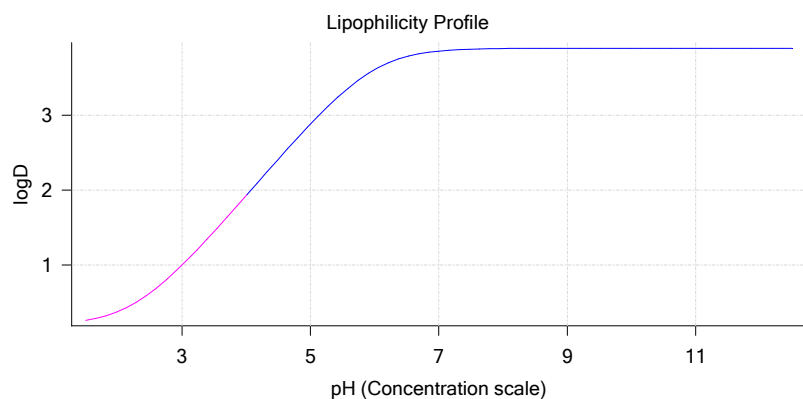

## Sample logD and percent species

| pH     | M04_octanol<br>logD | M04_octanol<br>M04_octanolH | M04_octanol<br>M04_octanol | M04_octanol<br>M04_octanolH* | M04_octanol<br>M04_octanol* | Comment    |
|--------|---------------------|-----------------------------|----------------------------|------------------------------|-----------------------------|------------|
| 1.000  | 0.21                | 90.50 %                     | 0.00 %                     | 9.01 %                       | 0.49 %                      | Stomach pH |
| 1.200  | 0.23                | 90.24 %                     | 0.00 %                     | 8.99 %                       | 0.77 %                      |            |
| 2.000  | 0.38                | 86.67 %                     | 0.01 %                     | 8.63 %                       | 4.69 %                      |            |
| 3.000  | 1.00                | 60.90 %                     | 0.07 %                     | 6.07 %                       | 32.97 %                     |            |
| 4.000  | 1.93                | 15.33 %                     | 0.16 %                     | 1.53 %                       | 82.98 %                     |            |
| 5.000  | 2.88                | 1.81 %                      | 0.19 %                     | 0.18 %                       | 97.82 %                     | Blood pH   |
| 6.000  | 3.61                | 0.18 %                      | 0.20 %                     | 0.02 %                       | 99.60 %                     |            |
| 6.500  | 3.78                | 0.06 %                      | 0.20 %                     | 0.01 %                       | 99.74 %                     |            |
| 7.000  | 3.86                | 0.02 %                      | 0.20 %                     | 0.00 %                       | 99.78 %                     |            |
| 7.400  | 3.88                | 0.01 %                      | 0.20 %                     | 0.00 %                       | 99.79 %                     |            |
| 8.000  | 3.89                | 0.00 %                      | 0.20 %                     | 0.00 %                       | 99.80 %                     |            |
| 9.000  | 3.89                | 0.00 %                      | 0.20 %                     | 0.00 %                       | 99.80 %                     |            |
| 10.000 | 3.90                | 0.00 %                      | 0.20 %                     | 0.00 %                       | 99.80 %                     |            |
| 11.000 | 3.90                | 0.00 %                      | 0.20 %                     | 0.00 %                       | 99.80 %                     |            |
| 12.000 | 3.90                | 0.00 %                      | 0.20 %                     | 0.00 %                       | 99.80 %                     |            |

## Carbonate and acidity

 Carbonate 0.106 mM  
 Acidity error -0.195 mM

## Other graphs

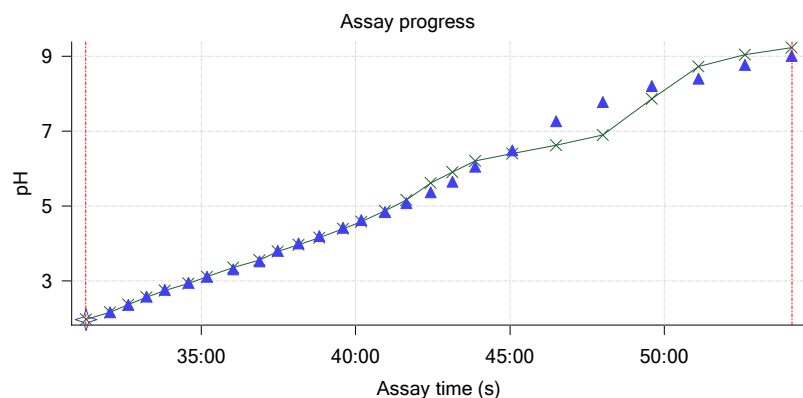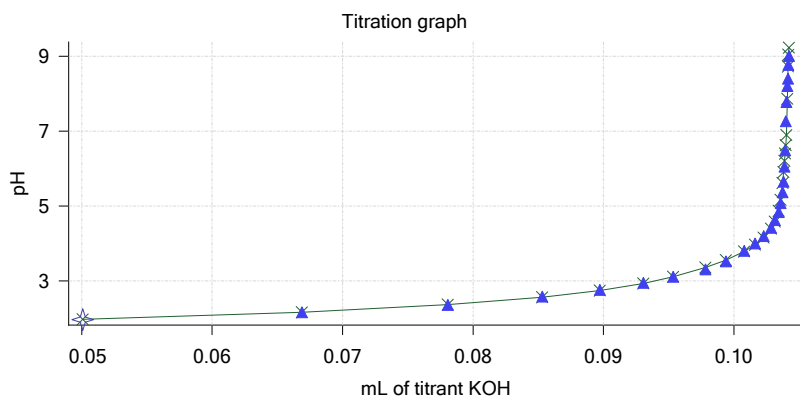



Sample name: **M04\_octanol**  
 Assay name: **pH-metric high logP**  
 Assay ID: **18C-24003**  
 Filename: **C:\Sirius\_T3\Mehtap\20180323\_exp33\_logP\_T3-2\18C-24003\_M04\_octanol\_pH-metric high logP.t3r**

Experiment start time: **3/24/2018 2:50:31 AM**  
 Analyst: **Dorothy Levorse**  
 Instrument ID: **T312060**

## Other graphs (continued)

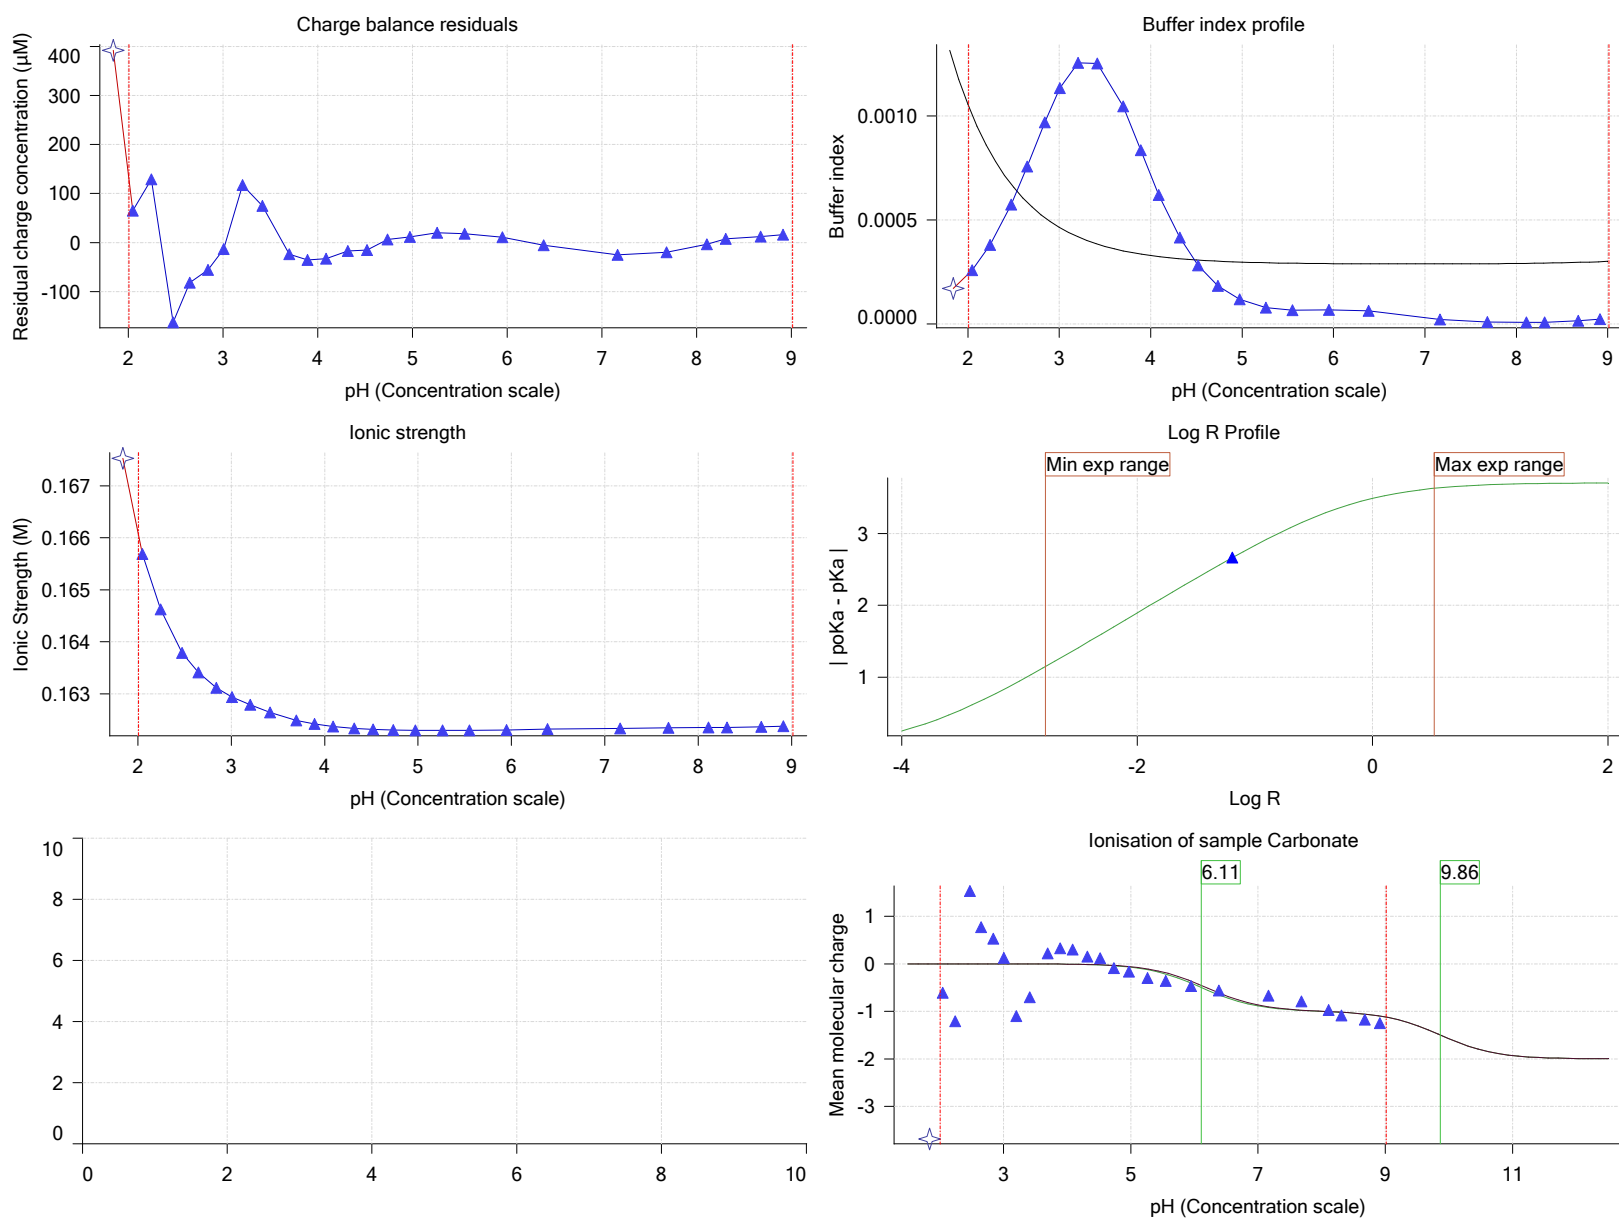

Sample name: **M04\_octanol**  
 Assay name: **pH-metric high logP**  
 Assay ID: **18C-24003**  
 Filename: **C:\Sirius\_T3\Mehtap\20180323\_exp33\_logP\_T3-2\18C-24003\_M04\_octanol\_pH-metric high logP.t3r**

Experiment start time: **3/24/2018 2:50:31 AM**  
 Analyst: **Dorothy Levorse**  
 Instrument ID: **T312060**

pH-metric high logP Titration 3 of 3 18C-24003 Points 53 to 77

## Overall results

RMSD 0.260  
 Average ionic strength 0.168 M  
 Average temperature 24.9°C  
 Partition ratio 0.2796 : 1  
 Analyte concentration range 1840.5 µM to 1888.2 µM  
 Total points considered 23 of 25

## Warnings and errors

Errors None  
 Warnings None

## Four-Plus parameters

|       |        |                      |                           |
|-------|--------|----------------------|---------------------------|
| Alpha | 0.119  | 3/24/2018 2:50:31 AM | C:\Sirius_T3\HCl18C23.t3r |
| S     | 0.9972 | 3/24/2018 2:50:31 AM | C:\Sirius_T3\HCl18C23.t3r |
| jH    | 0.9    | 3/24/2018 2:50:31 AM | C:\Sirius_T3\HCl18C23.t3r |
| jOH   | -0.3   | 3/24/2018 2:50:31 AM | C:\Sirius_T3\HCl18C23.t3r |

## Titrants

|            |          |                      |                           |
|------------|----------|----------------------|---------------------------|
| 0.50 M HCl | 0.997124 | 3/24/2018 2:50:31 AM | C:\Sirius_T3\HCl18C23.t3r |
| 0.50 M KOH | 1.003190 | 3/24/2018 2:50:31 AM | C:\Sirius_T3\KOH18C23.t3r |

## Sample

|                                  |       |
|----------------------------------|-------|
| M04_octanol concentration factor | 0.960 |
| Base pKa 1                       | 5.97  |
| logP (XH +)                      | 0.19  |
| logP (neutral X)                 | 3.59  |

## Sample graphs

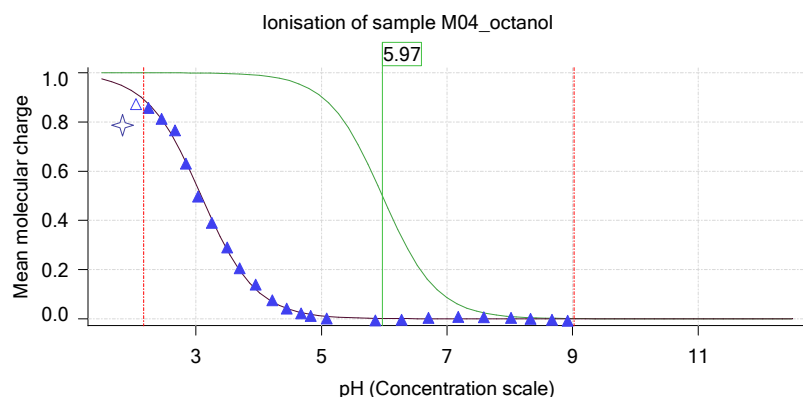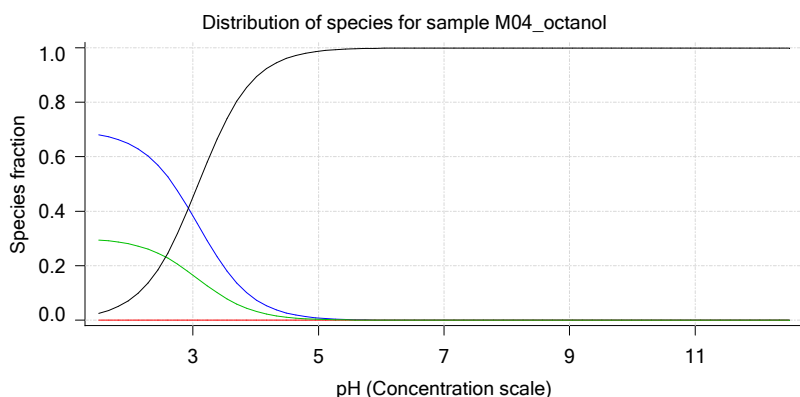

Sample name: **M04\_octanol**  
 Assay name: **pH-metric high logP**  
 Assay ID: **18C-24003**  
 Filename: **C:\Sirius\_T3\Mehtap\20180323\_exp33\_logP\_T3-2\18C-24003\_M04\_octanol\_pH-metric high logP.t3r**

Experiment start time: **3/24/2018 2:50:31 AM**  
 Analyst: **Dorothy Levorse**  
 Instrument ID: **T312060**

## Sample graphs (continued)

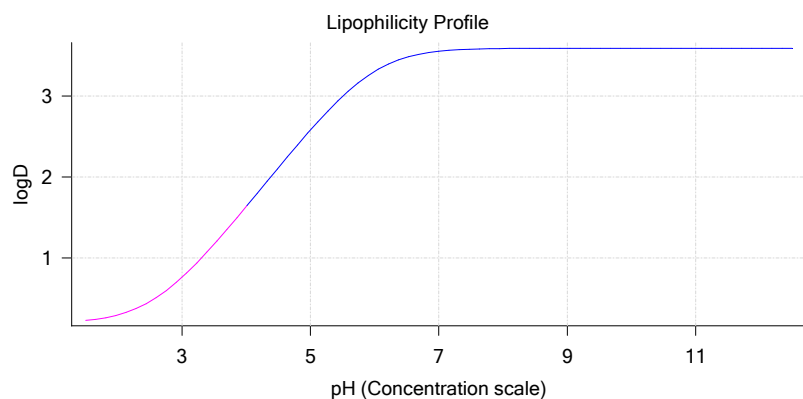

## Sample logD and percent species

| pH     | M04_octanol<br>logD | M04_octanol<br>M04_octanolH | M04_octanol<br>M04_octanolH | M04_octanol<br>M04_octanolH* | M04_octanol<br>M04_octanol* | Comment    |
|--------|---------------------|-----------------------------|-----------------------------|------------------------------|-----------------------------|------------|
| 1.000  | 0.20                | 69.22 %                     | 0.00 %                      | 29.97 %                      | 0.81 %                      |            |
| 1.200  | 0.21                | 68.89 %                     | 0.00 %                      | 29.83 %                      | 1.28 %                      | Stomach pH |
| 2.000  | 0.29                | 64.50 %                     | 0.01 %                      | 27.93 %                      | 7.57 %                      |            |
| 3.000  | 0.76                | 38.35 %                     | 0.04 %                      | 16.61 %                      | 45.00 %                     |            |
| 4.000  | 1.63                | 7.59 %                      | 0.08 %                      | 3.29 %                       | 89.04 %                     |            |
| 5.000  | 2.58                | 0.84 %                      | 0.09 %                      | 0.36 %                       | 98.70 %                     |            |
| 6.000  | 3.31                | 0.09 %                      | 0.09 %                      | 0.04 %                       | 99.79 %                     |            |
| 6.500  | 3.48                | 0.03 %                      | 0.09 %                      | 0.01 %                       | 99.87 %                     |            |
| 7.000  | 3.55                | 0.01 %                      | 0.09 %                      | 0.00 %                       | 99.90 %                     |            |
| 7.400  | 3.58                | 0.00 %                      | 0.09 %                      | 0.00 %                       | 99.90 %                     | Blood pH   |
| 8.000  | 3.59                | 0.00 %                      | 0.09 %                      | 0.00 %                       | 99.91 %                     |            |
| 9.000  | 3.59                | 0.00 %                      | 0.09 %                      | 0.00 %                       | 99.91 %                     |            |
| 10.000 | 3.59                | 0.00 %                      | 0.09 %                      | 0.00 %                       | 99.91 %                     |            |
| 11.000 | 3.59                | 0.00 %                      | 0.09 %                      | 0.00 %                       | 99.91 %                     |            |
| 12.000 | 3.59                | 0.00 %                      | 0.09 %                      | 0.00 %                       | 99.91 %                     |            |

## Carbonate and acidity

 Carbonate 0.119 mM  
 Acidity error 0.082 mM

## Other graphs

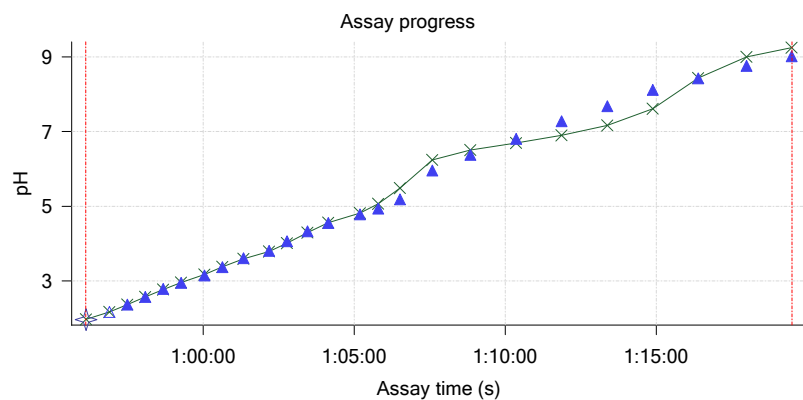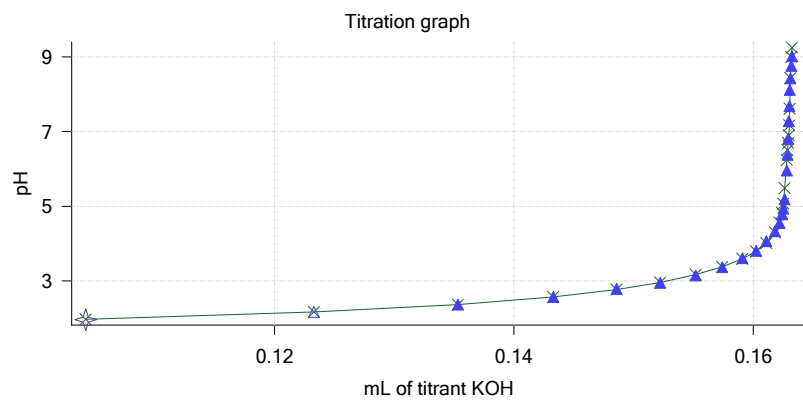

Sample name: **M04\_octanol**  
 Assay name: **pH-metric high logP**  
 Assay ID: **18C-24003**  
 Filename: **C:\Sirius\_T3\Mehtap\20180323\_exp33\_logP\_T3-2\18C-24003\_M04\_octanol\_pH-metric high logP.t3r**

Experiment start time: **3/24/2018 2:50:31 AM**  
 Analyst: **Dorothy Levorse**  
 Instrument ID: **T312060**

## Other graphs (continued)

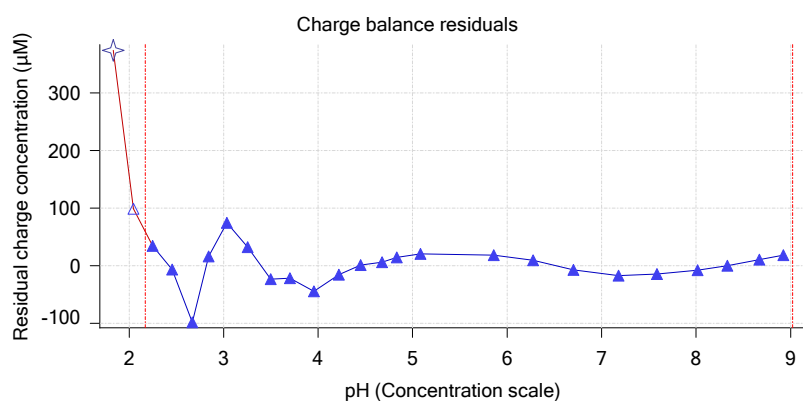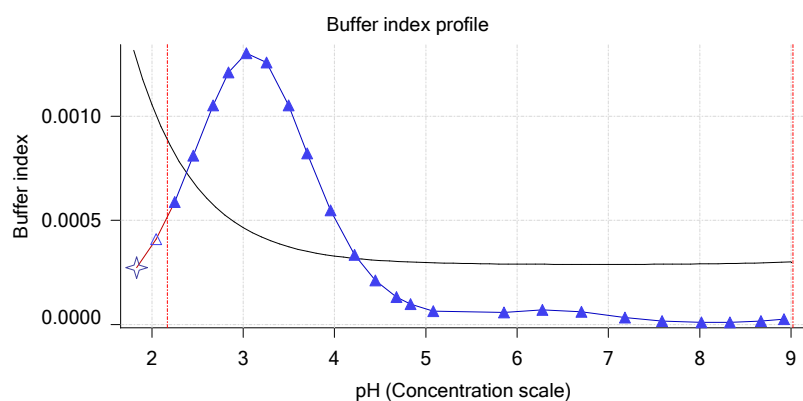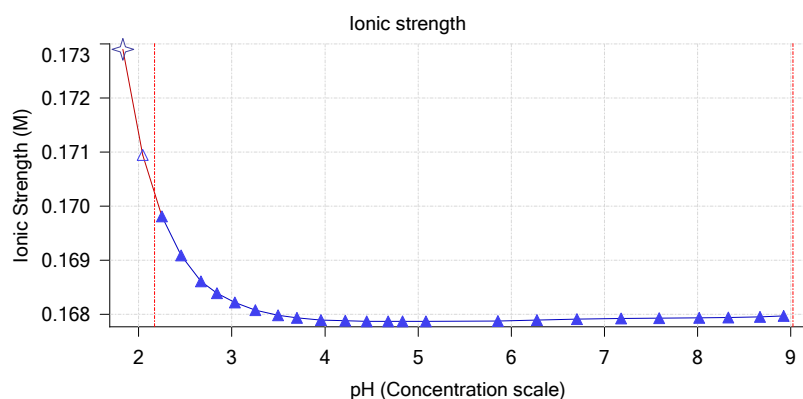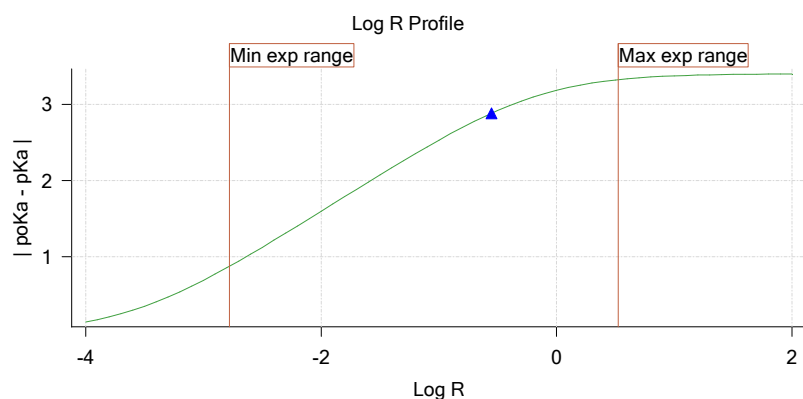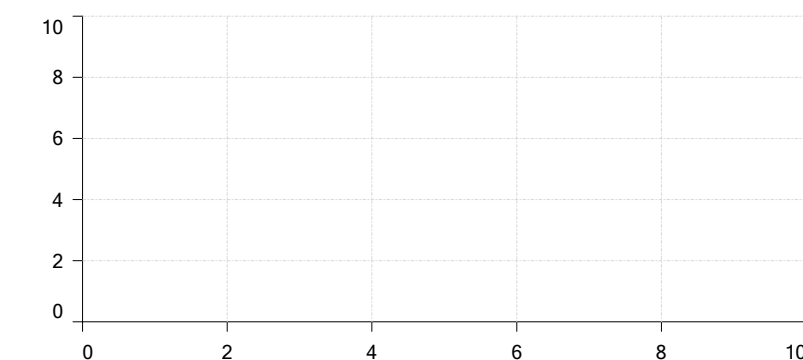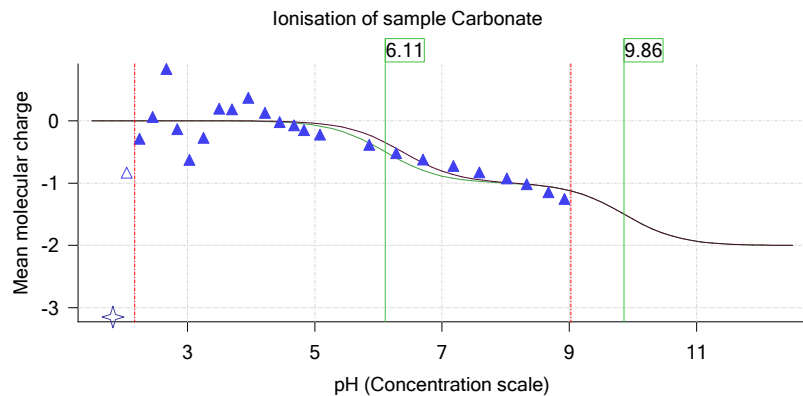

Sample name: **M04\_octanol**  
 Assay name: **pH-metric high logP**  
 Assay ID: **18C-24003**  
 Filename: **C:\Sirius\_T3\Mehtap\20180323\_exp33\_logP\_T3-2\18C-24003\_M04\_octanol\_pH-metric high logP.t3r**

Experiment start time: **3/24/2018 2:50:31 AM**  
 Analyst: **Dorothy Levorse**  
 Instrument ID: **T312060**

## Assay Model

| Settings                          | Value        | Date/Time changed    | Imported from      |
|-----------------------------------|--------------|----------------------|--------------------|
| Sample name                       | M04_octanol  | 3/9/2018 4:34:21 PM  | User entered value |
| Sample by                         | Weight       |                      | Default value      |
| Sample weight                     | 0.001160 g   | 3/23/2018 5:00:38 PM | User entered value |
| Formula weight                    | 269.73 g/mol | 3/9/2018 4:34:21 PM  | User entered value |
| Solubility                        | Unknown      |                      | Default value      |
| Molecular weight                  | 269.73       | 3/9/2018 4:34:21 PM  | User entered value |
| Individual pKa ionic environments | No           |                      | Default value      |
| Number of pKas                    | 1            | 3/9/2018 4:34:21 PM  | User entered value |
| Sample is a                       | Base         | 3/9/2018 4:34:21 PM  | User entered value |
| pKa 1                             | 5.97         | 3/9/2018 4:34:21 PM  | User entered value |
| logp (XH +)                       | 0.19         | 3/9/2018 4:34:33 PM  | User entered value |
| logP (neutral X)                  | 3.50         | 3/23/2018 2:32:46 PM | User entered value |

## Events

| Time    | Event             | Water      | Acid       | Base       | Octanol    | pH    | dpH/dt   | pH R-squared | pH SD   | dpH/dt time         |
|---------|-------------------|------------|------------|------------|------------|-------|----------|--------------|---------|---------------------|
| 4:59.5  | Initial pH = 5.97 |            |            |            |            |       |          |              |         |                     |
| 8:04.2  | Data point 1      | 1.50000 mL | 0.04965 mL | 0.00151 mL | 0.03001 mL | 2.007 | 0.00427  | 0.35010      | 0.00036 | 10.0 s              |
| 8:50.5  | Data point 2      | 1.50000 mL | 0.04965 mL | 0.01651 mL | 0.03001 mL | 2.218 | -0.00672 | 0.12678      | 0.00093 | 10.0 s              |
| 9:26.1  | Data point 3      | 1.50000 mL | 0.04965 mL | 0.02571 mL | 0.03001 mL | 2.420 | 0.00425  | 0.38859      | 0.00034 | 10.0 s              |
| 10:01.6 | Data point 4      | 1.50000 mL | 0.04965 mL | 0.03151 mL | 0.03001 mL | 2.606 | -0.00797 | 0.19529      | 0.00089 | 10.0 s              |
| 10:37.2 | Data point 5      | 1.50000 mL | 0.04965 mL | 0.03532 mL | 0.03001 mL | 2.816 | -0.00186 | 0.44711      | 0.00014 | 10.0 s              |
| 11:12.6 | Data point 6      | 1.50000 mL | 0.04965 mL | 0.03775 mL | 0.03001 mL | 3.003 | 0.00280  | 0.09562      | 0.00045 | 10.0 s              |
| 11:48.1 | Data point 7      | 1.50000 mL | 0.04965 mL | 0.03944 mL | 0.03001 mL | 3.158 | 0.00375  | 0.14586      | 0.00048 | 10.0 s              |
| 12:39.0 | Data point 8      | 1.50000 mL | 0.04965 mL | 0.04116 mL | 0.03001 mL | 3.347 | -0.00347 | 0.70036      | 0.00020 | 10.0 s              |
| 13:24.7 | Data point 9      | 1.50000 mL | 0.04965 mL | 0.04240 mL | 0.03001 mL | 3.533 | -0.00887 | 0.63978      | 0.00055 | 10.0 s              |
| 14:00.2 | Data point 10     | 1.50000 mL | 0.04965 mL | 0.04341 mL | 0.03001 mL | 3.695 | -0.00873 | 0.74697      | 0.00050 | 10.0 s              |
| 14:46.0 | Data point 11     | 1.50000 mL | 0.04965 mL | 0.04445 mL | 0.03001 mL | 3.867 | -0.01180 | 0.86864      | 0.00063 | 10.0 s              |
| 15:21.3 | Data point 12     | 1.50000 mL | 0.04965 mL | 0.04551 mL | 0.03001 mL | 4.056 | -0.01653 | 0.82606      | 0.00090 | 10.0 s              |
| 15:56.8 | Data point 13     | 1.50000 mL | 0.04965 mL | 0.04659 mL | 0.03001 mL | 4.268 | -0.01706 | 0.91582      | 0.00088 | 10.5 s              |
| 16:32.8 | Data point 14     | 1.50000 mL | 0.04965 mL | 0.04765 mL | 0.03001 mL | 4.537 | -0.01779 | 0.85452      | 0.00095 | 11.5 s              |
| 17:14.9 | Data point 15     | 1.50000 mL | 0.04965 mL | 0.04828 mL | 0.03001 mL | 4.714 | -0.01769 | 0.95197      | 0.00089 | 13.0 s              |
| 17:53.3 | Data point 16     | 1.50000 mL | 0.04965 mL | 0.04866 mL | 0.03001 mL | 4.876 | -0.01700 | 0.83581      | 0.00092 | 13.0 s              |
| 18:31.7 | Data point 17     | 1.50000 mL | 0.04965 mL | 0.04897 mL | 0.03001 mL | 5.040 | -0.01747 | 0.89358      | 0.00091 | 14.0 s              |
| 19:11.1 | Data point 18     | 1.50000 mL | 0.04965 mL | 0.04920 mL | 0.03001 mL | 5.236 | -0.01840 | 0.90934      | 0.00095 | 15.5 s              |
| 20:02.3 | Data point 19     | 1.50000 mL | 0.04965 mL | 0.04944 mL | 0.03001 mL | 5.461 | -0.01934 | 0.94812      | 0.00098 | 21.5 s              |
| 20:54.3 | Data point 20     | 1.50000 mL | 0.04965 mL | 0.04965 mL | 0.03001 mL | 5.969 | -0.01829 | 0.93298      | 0.00093 | 36.0 s              |
| 21:55.7 | Data point 21     | 1.50000 mL | 0.04965 mL | 0.04974 mL | 0.03001 mL | 6.338 | -0.01998 | 0.98727      | 0.00099 | 53.0 s              |
| 23:19.4 | Data point 22     | 1.50000 mL | 0.04965 mL | 0.04981 mL | 0.03001 mL | 6.965 | -0.05661 | 0.98918      | 0.00281 | Timed out at 59.5 s |
| 24:55.0 | Data point 23     | 1.50000 mL | 0.04965 mL | 0.04988 mL | 0.03001 mL | 7.732 | -0.10014 | 0.99537      | 0.00496 | Timed out at 59.5 s |
| 26:25.5 | Data point 24     | 1.50000 mL | 0.04965 mL | 0.04993 mL | 0.03001 mL | 8.300 | -0.05511 | 0.99507      | 0.00273 | Timed out at 59.5 s |
| 28:01.1 | Data point 25     | 1.50000 mL | 0.04965 mL | 0.05000 mL | 0.03001 mL | 8.709 | -0.01976 | 0.97372      | 0.00099 | 56.5 s              |
| 29:33.2 | Data point 26     | 1.50000 mL | 0.04965 mL | 0.05007 mL | 0.03001 mL | 9.016 | -0.01909 | 0.93060      | 0.00098 | 43.0 s              |
| 31:16.2 | Data point 27     | 1.50000 mL | 0.10503 mL | 0.05007 mL | 0.11002 mL | 1.966 | -0.00262 | 0.17546      | 0.00031 | 10.0 s              |
| 32:02.5 | Data point 28     | 1.50000 mL | 0.10503 mL | 0.06689 mL | 0.11002 mL | 2.167 | -0.00002 | 0.00005      | 0.00013 | 10.0 s              |
| 32:38.3 | Data point 29     | 1.50000 mL | 0.10503 mL | 0.07808 mL | 0.11002 mL | 2.360 | -0.00053 | 0.02080      | 0.00018 | 10.0 s              |
| 33:13.7 | Data point 30     | 1.50000 mL | 0.10503 mL | 0.08530 mL | 0.11002 mL | 2.588 | 0.00069  | 0.01014      | 0.00034 | 10.0 s              |
| 33:49.3 | Data point 31     | 1.50000 mL | 0.10503 mL | 0.08972 mL | 0.11002 mL | 2.762 | -0.00184 | 0.09470      | 0.00030 | 10.0 s              |
| 34:35.2 | Data point 32     | 1.50000 mL | 0.10503 mL | 0.09306 mL | 0.11002 mL | 2.952 | -0.00238 | 0.48804      | 0.00017 | 10.5 s              |
| 35:11.1 | Data point 33     | 1.50000 mL | 0.10503 mL | 0.09534 mL | 0.11002 mL | 3.117 | -0.00618 | 0.30787      | 0.00055 | 10.0 s              |
| 36:02.2 | Data point 34     | 1.50000 mL | 0.10503 mL | 0.09781 mL | 0.11002 mL | 3.314 | -0.00705 | 0.70654      | 0.00041 | 10.0 s              |
| 36:53.1 | Data point 35     | 1.50000 mL | 0.10503 mL | 0.09939 mL | 0.11002 mL | 3.524 | -0.00556 | 0.85447      | 0.00030 | 10.0 s              |
| 37:28.6 | Data point 36     | 1.50000 mL | 0.10503 mL | 0.10080 mL | 0.11002 mL | 3.806 | -0.00526 | 0.75008      | 0.00030 | 10.0 s              |
| 38:09.2 | Data point 37     | 1.50000 mL | 0.10503 mL | 0.10162 mL | 0.11002 mL | 3.999 | -0.01309 | 0.90328      | 0.00068 | 10.0 s              |

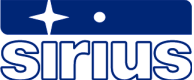

## Assay Events

Sample name: **M04\_octanol**  
Assay name: **pH-metric high logP**  
Assay ID: **18C-24003**  
Filename: **C:\Sirius\_T3\Mehtap\20180323\_exp33\_logP\_T3-2\18C-24003\_M04\_octanol\_pH-metric high logP.t3r**

Experiment start time: **3/24/2018 2:50:31 AM**  
Analyst: **Dorothy Levorse**  
Instrument ID: **T312060**

## Events (continued)

| Time      | Event         | Water      | Acid       | Base       | Octanol    | pH    | dpH/dt   | pH R-squared | pH SD   | dpH/dt time         |
|-----------|---------------|------------|------------|------------|------------|-------|----------|--------------|---------|---------------------|
| 38:49.7   | Data point 38 | 1.50000 mL | 0.10503 mL | 0.10228 mL | 0.11002 mL | 4.196 | -0.00633 | 0.53369      | 0.00043 | 10.0 s              |
| 39:35.4   | Data point 39 | 1.50000 mL | 0.10503 mL | 0.10285 mL | 0.11002 mL | 4.425 | -0.01381 | 0.73265      | 0.00080 | 10.0 s              |
| 40:10.8   | Data point 40 | 1.50000 mL | 0.10503 mL | 0.10315 mL | 0.11002 mL | 4.625 | 0.00050  | 0.00129      | 0.00069 | 10.5 s              |
| 40:57.0   | Data point 41 | 1.50000 mL | 0.10503 mL | 0.10343 mL | 0.11002 mL | 4.842 | -0.01579 | 0.77724      | 0.00088 | 11.0 s              |
| 41:38.5   | Data point 42 | 1.50000 mL | 0.10503 mL | 0.10360 mL | 0.11002 mL | 5.078 | -0.00838 | 0.38707      | 0.00067 | 11.5 s              |
| 42:25.7   | Data point 43 | 1.50000 mL | 0.10503 mL | 0.10374 mL | 0.11002 mL | 5.365 | -0.00881 | 0.23766      | 0.00089 | 12.0 s              |
| 43:08.2   | Data point 44 | 1.50000 mL | 0.10503 mL | 0.10381 mL | 0.11002 mL | 5.655 | -0.01757 | 0.85957      | 0.00094 | 13.5 s              |
| 43:52.2   | Data point 45 | 1.50000 mL | 0.10503 mL | 0.10388 mL | 0.11002 mL | 6.051 | -0.01851 | 0.93922      | 0.00094 | 41.5 s              |
| 45:04.4   | Data point 46 | 1.50000 mL | 0.10503 mL | 0.10393 mL | 0.11002 mL | 6.487 | -0.02808 | 0.98839      | 0.00139 | Timed out at 59.5 s |
| 46:29.9   | Data point 47 | 1.50000 mL | 0.10503 mL | 0.10398 mL | 0.11002 mL | 7.265 | -0.09351 | 0.99809      | 0.00462 | Timed out at 59.5 s |
| 48:00.3   | Data point 48 | 1.50000 mL | 0.10503 mL | 0.10402 mL | 0.11002 mL | 7.780 | -0.09755 | 0.99711      | 0.00483 | Timed out at 59.5 s |
| 49:35.9   | Data point 49 | 1.50000 mL | 0.10503 mL | 0.10409 mL | 0.11002 mL | 8.206 | -0.05783 | 0.98965      | 0.00287 | Timed out at 59.5 s |
| 51:06.4   | Data point 50 | 1.50000 mL | 0.10503 mL | 0.10414 mL | 0.11002 mL | 8.404 | -0.03670 | 0.98260      | 0.00183 | Timed out at 59.5 s |
| 52:36.9   | Data point 51 | 1.50000 mL | 0.10503 mL | 0.10419 mL | 0.11002 mL | 8.772 | -0.02623 | 0.91998      | 0.00135 | Timed out at 59.5 s |
| 54:07.4   | Data point 52 | 1.50000 mL | 0.10503 mL | 0.10423 mL | 0.11002 mL | 9.008 | -0.01967 | 0.95537      | 0.00099 | 37.0 s              |
| 56:07.6   | Data point 53 | 1.50000 mL | 0.16334 mL | 0.10423 mL | 0.51002 mL | 1.958 | -0.00498 | 0.69174      | 0.00030 | 10.0 s              |
| 56:53.8   | Data point 54 | 1.50000 mL | 0.16334 mL | 0.12331 mL | 0.51002 mL | 2.165 | 0.01137  | 0.42530      | 0.00086 | 10.0 s              |
| 57:29.6   | Data point 55 | 1.50000 mL | 0.16334 mL | 0.13533 mL | 0.51002 mL | 2.365 | -0.01105 | 0.37291      | 0.00089 | 10.0 s              |
| 58:05.2   | Data point 56 | 1.50000 mL | 0.16334 mL | 0.14330 mL | 0.51002 mL | 2.569 | -0.00999 | 0.57469      | 0.00065 | 10.0 s              |
| 58:40.8   | Data point 57 | 1.50000 mL | 0.16334 mL | 0.14859 mL | 0.51002 mL | 2.782 | -0.00724 | 0.84718      | 0.00039 | 10.0 s              |
| 59:16.3   | Data point 58 | 1.50000 mL | 0.16334 mL | 0.15221 mL | 0.51002 mL | 2.951 | -0.00453 | 0.17701      | 0.00053 | 10.5 s              |
| 1:00:02.6 | Data point 59 | 1.50000 mL | 0.16334 mL | 0.15520 mL | 0.51002 mL | 3.145 | -0.00569 | 0.12433      | 0.00080 | 10.0 s              |
| 1:00:38.1 | Data point 60 | 1.50000 mL | 0.16334 mL | 0.15741 mL | 0.51002 mL | 3.364 | -0.01891 | 0.93813      | 0.00096 | 16.5 s              |
| 1:01:20.1 | Data point 61 | 1.50000 mL | 0.16334 mL | 0.15910 mL | 0.51002 mL | 3.607 | -0.00838 | 0.90591      | 0.00043 | 10.0 s              |
| 1:02:11.1 | Data point 62 | 1.50000 mL | 0.16334 mL | 0.16023 mL | 0.51002 mL | 3.809 | -0.01009 | 0.62944      | 0.00063 | 10.0 s              |
| 1:02:46.4 | Data point 63 | 1.50000 mL | 0.16334 mL | 0.16110 mL | 0.51002 mL | 4.063 | -0.01406 | 0.72392      | 0.00082 | 10.0 s              |
| 1:03:27.2 | Data point 64 | 1.50000 mL | 0.16334 mL | 0.16181 mL | 0.51002 mL | 4.326 | -0.01356 | 0.90136      | 0.00070 | 10.5 s              |
| 1:04:08.2 | Data point 65 | 1.50000 mL | 0.16334 mL | 0.16218 mL | 0.51002 mL | 4.555 | -0.01747 | 0.81566      | 0.00096 | 37.5 s              |
| 1:05:11.2 | Data point 66 | 1.50000 mL | 0.16334 mL | 0.16239 mL | 0.51002 mL | 4.783 | -0.01567 | 0.79185      | 0.00087 | 11.0 s              |
| 1:05:47.6 | Data point 67 | 1.50000 mL | 0.16334 mL | 0.16251 mL | 0.51002 mL | 4.937 | -0.01579 | 0.62099      | 0.00099 | 12.5 s              |
| 1:06:30.6 | Data point 68 | 1.50000 mL | 0.16334 mL | 0.16263 mL | 0.51002 mL | 5.187 | -0.01710 | 0.86918      | 0.00091 | 34.0 s              |
| 1:07:35.2 | Data point 69 | 1.50000 mL | 0.16334 mL | 0.16279 mL | 0.51002 mL | 5.960 | -0.01912 | 0.94697      | 0.00097 | 45.0 s              |
| 1:08:50.9 | Data point 70 | 1.50000 mL | 0.16334 mL | 0.16287 mL | 0.51002 mL | 6.378 | -0.03153 | 0.95619      | 0.00159 | Timed out at 59.5 s |
| 1:10:21.3 | Data point 71 | 1.50000 mL | 0.16334 mL | 0.16291 mL | 0.51002 mL | 6.803 | -0.06207 | 0.98528      | 0.00309 | Timed out at 59.5 s |
| 1:11:51.8 | Data point 72 | 1.50000 mL | 0.16334 mL | 0.16296 mL | 0.51002 mL | 7.279 | -0.09237 | 0.99346      | 0.00458 | Timed out at 59.5 s |
| 1:13:22.3 | Data point 73 | 1.50000 mL | 0.16334 mL | 0.16301 mL | 0.51002 mL | 7.684 | -0.09598 | 0.99125      | 0.00476 | Timed out at 59.5 s |
| 1:14:52.8 | Data point 74 | 1.50000 mL | 0.16334 mL | 0.16305 mL | 0.51002 mL | 8.114 | -0.08212 | 0.99372      | 0.00407 | Timed out at 59.5 s |
| 1:16:23.3 | Data point 75 | 1.50000 mL | 0.16334 mL | 0.16310 mL | 0.51002 mL | 8.426 | -0.04721 | 0.97560      | 0.00236 | Timed out at 59.5 s |
| 1:17:58.8 | Data point 76 | 1.50000 mL | 0.16334 mL | 0.16317 mL | 0.51002 mL | 8.764 | -0.01810 | 0.93699      | 0.00092 | 59.0 s              |
| 1:19:28.4 | Data point 77 | 1.50000 mL | 0.16334 mL | 0.16324 mL | 0.51002 mL | 9.016 | -0.00920 | 0.71690      | 0.00054 | 30.0 s              |
| 1:20:07.6 | Assay volumes | 1.50000 mL | 0.16334 mL | 0.16324 mL | 0.51002 mL |       |          |              |         |                     |

Sample name: **M04\_octanol**  
 Assay name: **pH-metric high logP**  
 Assay ID: **18C-24003**  
 Filename: **C:\Sirius\_T3\Mehtap\20180323\_exp33\_logP\_T3-2\18C-24003\_M04\_octanol\_pH-metric high logP.t3r**

Experiment start time: **3/24/2018 2:50:31 AM**  
 Analyst: **Dorothy Levorse**  
 Instrument ID: **T312060**

## Assay Settings

| Setting                             | Value              | Original Value | Date/Time changed | Imported from |
|-------------------------------------|--------------------|----------------|-------------------|---------------|
| <b>General Settings</b>             |                    |                |                   |               |
| Analyst name                        | Dorothy Levorse    |                |                   |               |
| <b>Standard Experiment Settings</b> |                    |                |                   |               |
| Number of titrations                | 3                  |                |                   |               |
| Minimum pH                          | 2.000              |                |                   |               |
| Maximum pH                          | 9.000              |                |                   |               |
| pH step between points of           | 0.200              |                |                   |               |
| Minimum titrant addition            | 0.00002 mL         |                |                   |               |
| Maximum titrant addition            | 0.10000 mL         |                |                   |               |
| Argon flow rate                     | 100%               |                |                   |               |
| Start titration using               | Cautious pH adjust |                |                   |               |
| <b>Advanced General Settings</b>    |                    |                |                   |               |
| Detect turbidity using              | None               |                |                   |               |
| Collect turbidity sensor data       | No                 |                |                   |               |
| Collect UV spectra                  | No                 |                |                   |               |
| Stir after titrant addition for     | 5 seconds          |                |                   |               |
| For titrant addition, stir at       | 10%                |                |                   |               |
| <b>Titration Pre-Dose</b>           |                    |                |                   |               |
| Titration pre-dose                  | None               |                |                   |               |
| <b>Assay Medium</b>                 |                    |                |                   |               |
| ISA water volume                    | 1.50 mL            |                |                   |               |
| Water added                         | Automatic          |                |                   |               |
| Partition solvent type              | Octanol            |                |                   |               |
| Partition volume                    | 0.030 mL           |                |                   |               |
| Partition solvent added             | Automatic          |                |                   |               |
| After partition addition, stir for  | 1 seconds          |                |                   |               |
| <b>Sample Sonication</b>            |                    |                |                   |               |
| Sonicate                            | Yes                |                |                   |               |
| Adjust pH for sonication            | No                 |                |                   |               |
| Sonicate for                        | 60 seconds         |                |                   |               |
| After sonication stir for           | 5 seconds          |                |                   |               |
| <b>Sample Dissolution</b>           |                    |                |                   |               |
| Perform a dissolution stage         | Yes                |                |                   |               |
| Adjust and hold pH for dissolution  | To start pH        |                |                   |               |
| Stir to dissolve for                | 120 seconds        |                |                   |               |
| For dissolution, stir at            | 10%                |                |                   |               |
| <b>Carbonate purge</b>              |                    |                |                   |               |
| Perform a carbonate purge           | No                 |                |                   |               |
| <b>Temperature Control</b>          |                    |                |                   |               |
| Wait for temperature                | Yes                |                |                   |               |
| Required start temperature          | 25.0°C             |                |                   |               |
| Acceptable deviation                | 0.5°C              |                |                   |               |
| Time to wait                        | 60 seconds         |                |                   |               |
| Stir speed of                       | 50%                |                |                   |               |
| <b>Titration 1</b>                  |                    |                |                   |               |
| Titrate from                        | Low to high pH     |                |                   |               |
| Adjust to start pH                  | Yes                |                |                   |               |
| After pH adjust stir for            | 30 seconds         |                |                   |               |
| Stir to allow partitioning for      | 15 seconds         |                |                   |               |
| Stirrer speed for partitioning      | 50%                |                |                   |               |
| <b>Titration 2</b>                  |                    |                |                   |               |
| Titrate from                        | Low to high pH     |                |                   |               |
| Add additional water                | 0.00 mL            |                |                   |               |
| Additional partition solvent volume | 0.080 mL           |                |                   |               |
| Additional partition solvent added  | Automatic          |                |                   |               |
| After pH adjust stir for            | 30 seconds         |                |                   |               |
| Stir to allow partitioning for      | 15 seconds         |                |                   |               |
| Stirrer speed for partitioning      | 55%                |                |                   |               |



Sample name: **M04\_octanol**  
 Assay name: **pH-metric high logP**  
 Assay ID: **18C-24003**  
 Filename: **C:\Sirius\_T3\Mehtap\20180323\_exp33\_logP\_T3-2\18C-24003\_M04\_octanol\_pH-metric high logP.t3r**

Experiment start time: **3/24/2018 2:50:31 AM**  
 Analyst: **Dorothy Levorse**  
 Instrument ID: **T312060**

## Assay Settings (continued)

| Setting                             | Value          | Original Value | Date/Time changed | Imported from |
|-------------------------------------|----------------|----------------|-------------------|---------------|
| <b>Titration 3</b>                  |                |                |                   |               |
| Titrate from                        | Low to high pH |                |                   |               |
| Add additional water                | 0.00 mL        |                |                   |               |
| Additional partition solvent volume | 0.400 mL       |                |                   |               |
| Additional partition solvent added  | Automatic      |                |                   |               |
| After pH adjust stir for            | 30 seconds     |                |                   |               |
| Stir to allow partitioning for      | 15 seconds     |                |                   |               |
| Stirrer speed for partitioning      | 60%            |                |                   |               |
| <b>Data Point Stability</b>         |                |                |                   |               |
| Stir during data point collection   | No             |                |                   |               |
| Delay before data point collection  | 0 seconds      |                |                   |               |
| Number of points to average         | 20 points      |                |                   |               |
| Time interval between points        | 0.50 seconds   |                |                   |               |
| Required maximum standard deviation | 0.00100 dpH/dt |                |                   |               |
| Stability timeout after             | 60 seconds     |                |                   |               |

## Calibration Settings

| Setting                   | Value  | Date/Time changed    | Imported from             |
|---------------------------|--------|----------------------|---------------------------|
| Four-Plus alpha           | 0.119  | 3/24/2018 2:50:31 AM | C:\Sirius_T3\HCl18C23.t3r |
| Four-Plus S               | 0.9972 | 3/24/2018 2:50:31 AM | C:\Sirius_T3\HCl18C23.t3r |
| Four-Plus jH              | 0.9    | 3/24/2018 2:50:31 AM | C:\Sirius_T3\HCl18C23.t3r |
| Four-Plus jOH             | -0.3   | 3/24/2018 2:50:31 AM | C:\Sirius_T3\HCl18C23.t3r |
| Base concentration factor | 1.003  | 3/24/2018 2:50:31 AM | C:\Sirius_T3\KOH18C23.t3r |
| Acid concentration factor | 0.997  | 3/24/2018 2:50:31 AM | C:\Sirius_T3\HCl18C23.t3r |

## Instrument Settings

| Setting              | Value                      | Batch Id    | Install date           |
|----------------------|----------------------------|-------------|------------------------|
| Instrument owner     | Merck                      |             |                        |
| Instrument ID        | T312060                    |             |                        |
| Instrument type      | T3 Simulator               |             |                        |
| Software version     | 1.1.3.0                    |             |                        |
| Dispenser module     |                            | T3DM1200361 | 3/31/2009 6:24:52 AM   |
| Dispenser 0          | Water                      |             | 3/31/2009 6:25:05 AM   |
| Syringe volume       | 2.5 mL                     |             |                        |
| Firmware version     | 1.2.1(r2)                  |             |                        |
| Titrant              | Water (0.15 M KCl)         | 02-06-2018  | 3/16/2018 11:09:18 AM  |
| Dispenser 2          | Acid                       |             | 3/31/2009 6:25:11 AM   |
| Syringe volume       | 0.5 mL                     |             |                        |
| Firmware version     | 1.2.1(r2)                  |             |                        |
| Titrant              | Acid (0.5 M HCl)           | 03-16-2018  | 3/16/2018 10:56:23 AM  |
| Dispenser 1          | Base                       |             | 3/31/2009 6:25:21 AM   |
| Syringe volume       | 0.5 mL                     |             |                        |
| Firmware version     | 1.2.1(r2)                  |             |                        |
| Titrant              | Base (0.5 M KOH)           | 3/22/2018   | 3/23/2018 9:34:17 AM   |
| Dispenser 5          | Cosolvent                  |             | 3/31/2009 6:26:24 AM   |
| Syringe volume       | 2.5 mL                     |             |                        |
| Firmware version     | 1.2.1(r2)                  |             |                        |
| Distribution valve 5 | Distribution Valve         |             | 3/31/2009 6:28:19 AM   |
| Firmware version     | 1.1.3                      |             |                        |
| Port A               | Methanol (80%, 0.15 M KCl) | 02-08-2018  | 3/6/2018 10:28:59 AM   |
| Port B               | Cyclohexane                | 11-01-17    | 2/27/2018 11:37:57 AM  |
| Dispenser 3          | Buffer                     |             | 8/3/2010 6:05:16 AM    |
| Syringe volume       | 0.5 mL                     |             |                        |
| Firmware version     | 1.2.1(r2)                  |             |                        |
| Titrant              | Dodecane                   | 2018/01/31  | 2/28/2018 11:18:04 AM  |
| Dispenser 6          | Octanol                    |             | 10/22/2010 11:52:43 AM |



Sample name: **M04\_octanol**  
Assay name: **pH-metric high logP**  
Assay ID: **18C-24003**  
Filename: **C:\Sirius\_T3\Mehtap\20180323\_exp33\_logP\_T3-2\18C-24003\_M04\_octanol\_pH-metric high logP.t3r**

Experiment start time: **3/24/2018 2:50:31 AM**  
Analyst: **Dorothy Levorse**  
Instrument ID: **T312060**

## Instrument Settings (continued)

| Setting                                   | Value                      | Batch Id    | Install date           |
|-------------------------------------------|----------------------------|-------------|------------------------|
| Syringe volume                            | 0.5 mL                     |             |                        |
| Firmware version                          | 1.2.1(r2)                  |             |                        |
| Titrant                                   | Octanol                    | 01-31-2018  | 2/27/2018 10:59:35 AM  |
| Titration                                 |                            | T3TM1200161 | 3/31/2009 6:24:17 AM   |
| Horizontal axis firmware version          | 1.17 AI1DI2DO2 Stepper 2   |             |                        |
| Vertical axis firmware version            | 1.17 AI1DI2DO2 Stepper 2   |             |                        |
| Chassis I/O firmware version              | 1.11 AI1DI0DO4 Norgren I/O |             |                        |
| Probe I/O firmware version                | 1.1.1                      |             |                        |
| Electrode                                 | T3 Electrode               | T3E0923     | 1/23/2018 3:01:00 PM   |
| E0 calibration                            | +5.05 mV                   |             | 3/24/2018 2:50:59 AM   |
| Filling solution                          | 3M KCl                     | KCL097      | 3/23/2018 9:29:07 AM   |
| Liquids                                   |                            |             |                        |
| Wash 1                                    | 50% IPA:50% Water          |             | 3/23/2018 9:29:12 AM   |
| Wash 2                                    | 0.5% Triton X-100 in H2O   |             | 3/23/2018 9:29:15 AM   |
| Buffer position 1                         | pH7 Wash                   |             | 3/23/2018 9:29:19 AM   |
| Buffer position 2                         | pH 7                       |             | 3/23/2018 9:29:21 AM   |
| Storage position                          |                            |             | 3/23/2018 9:30:23 AM   |
| Wash water                                | 7.6e+003 mL                | 03-12-2018  | 3/12/2018 9:25:04 AM   |
| Waste                                     | 2.6e+003 mL                |             | 3/12/2018 9:24:49 AM   |
| Temperature controller                    |                            |             | 8/5/2010 7:35:13 AM    |
| Turbidity detector                        |                            |             | 3/31/2009 6:24:45 AM   |
| Spectrometer                              |                            | 074811      | 11/23/2010 12:22:28 PM |
| Dip probe                                 |                            | 10196       |                        |
| Wavelength coefficient A0                 | 183.333                    |             |                        |
| Wavelength coefficient A1                 | 2.21568                    |             |                        |
| Wavelength coefficient A2                 | -0.000289308               |             |                        |
| Total lamp lit time                       | 162:53:01                  |             | 11/23/2010 12:22:28 PM |
| Calibrated on                             | 2/27/2018 11:40:38 AM      |             |                        |
| Integration time                          | 40                         |             |                        |
| Scans averaged                            | 10                         |             |                        |
| Autoloader                                |                            | T3AL1200345 | 11/10/2015 10:34:13 AM |
| Left-right axis firmware version          | 1.17 AI1DI2DO2 Stepper 2   |             |                        |
| Front-back axis firmware version          | 1.17 AI1DI2DO2 Stepper 2   |             |                        |
| Vertical axis firmware version            | 1.17 AI1DI2DO2 Stepper 2   |             |                        |
| Chassis I/O firmware version              | 1.11 AI1DI0DO4 Norgren I/O |             |                        |
| Configuration                             |                            |             |                        |
| Alternate titration position              | Titration position         |             |                        |
| Alternate reference position              | Reference position         |             |                        |
| Maximum standard vial volume              | 3.50 mL                    |             |                        |
| Maximum alternate vial volume             | 25.00 mL                   |             |                        |
| Automatic action idle period              | 5 minute(s)                |             |                        |
| Titration tube volume                     | 1.3 mL                     |             |                        |
| Syringe flush count                       | 3.50                       |             |                        |
| Flowing wash pump volume                  | 20.0 mL                    |             |                        |
| Flowing wash stir duration                | 5 s                        |             |                        |
| Flowing wash stir speed                   | 30%                        |             |                        |
| Solvent wash stir duration                | 5 s                        |             |                        |
| Solvent wash stir speed                   | 30%                        |             |                        |
| Surfactant wash stir duration             | 5 s                        |             |                        |
| Surfactant wash stir speed                | 30%                        |             |                        |
| E0 calibration minimum number of points   | 10                         |             |                        |
| E0 calibration maximum standard deviation | 0.01500                    |             |                        |
| E0 calibration timeout period             | 60 s                       |             |                        |
| E0 calibration stir duration              | 5 s                        |             |                        |
| E0 calibration preparation stir speed     | 30%                        |             |                        |
| E0 calibration buffer wash stir duration  | 5 s                        |             |                        |
| E0 calibration buffer wash stir speed     | 30%                        |             |                        |
| E0 calibration reading stir speed         | 0%                         |             |                        |

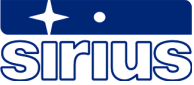

## Assay Settings

Sample name: **M04\_octanol** Experiment start time: **3/24/2018 2:50:31 AM**  
Assay name: **pH-metric high logP** Analyst: **Dorothy Levorse**  
Assay ID: **18C-24003** Instrument ID: **T312060**  
Filename: **C:\Sirius\_T3\Mehtap\20180323\_exp33\_logP\_T3-2\18C-24003\_M04\_octanol\_pH-metric high logP.t3r**

### Instrument Settings (continued)

| Setting                                     | Value   | Batch Id | Install date |
|---------------------------------------------|---------|----------|--------------|
| Spectrometer calibration stir duration      | 5 s     |          |              |
| Spectrometer calibration stir speed         | 30%     |          |              |
| Spectrometer calibration wash pump volume   | 20.0 mL |          |              |
| Spectrometer calibration wash stir duration | 5 s     |          |              |
| Spectrometer calibration wash stir speed    | 30%     |          |              |
| Overhead dispense height                    | 10000   |          |              |

### Refinement Settings

| Setting                        | Value    | Default value |
|--------------------------------|----------|---------------|
| Turbidity detection method     | None     | None          |
| Turbidity wavelength to assess | 500.0 nm | 500.0 nm      |
| Turbidity maximum absorbance   | 0.100    | 0.100         |
| Turbidity probe threshold      | 50.00    | 50.00         |
