# Supplementary material for: Octanol-water partition coefficient measurements for the SAMPL6 Blind Prediction Challenge
Source: bioRxiv or medRxiv preprint supplement (doi:10.1101/757393), 2019-12-02
Supplement: Supplementary file [file media-2.zip]

Sample name: **M02\_octanol**  
 Assay name: **pH-metric high logP**  
 Assay ID: **18C-03011**  
 Filename: **C:\Sirius\_T3\Mehtap\20180302\_exp29\_logP\_T3-2\18C-03011\_M02\_octanol\_pH-metric high logP.t3r**

Experiment start time: **3/3/2018 1:46:01 PM**  
 Analyst: **Dorothy Levorse**  
 Instrument ID: **T312060**

## pH-metric Result

logP (XH +) 0.45 ±0.04 (n=50)  
 logP (neutral X) 4.08 ±0.01 (n=50)

### 18C-03011 Points 1 to 20

M02\_octanol concentration factor 0.967  
 Carbonate 0.1632 mM  
 Acidity error -1.49856 mM

### 18C-03011 Points 21 to 48

M02\_octanol concentration factor 1.157  
 Carbonate 0.1227 mM  
 Acidity error -1.56956 mM

### 18C-03011 Points 49 to 70

M02\_octanol concentration factor 1.597  
 Carbonate 0.1477 mM  
 Acidity error -1.25180 mM

## Warnings and errors

Errors None  
 Warnings None

## Sample logD and percent species

| pH     | M02_octanol<br>logD | M02_octanol<br>M02_octanolH | M02_octanol<br>M02_octanol | M02_octanol<br>M02_octanolH* | M02_octanol<br>M02_octanol* | Comment    |
|--------|---------------------|-----------------------------|----------------------------|------------------------------|-----------------------------|------------|
| 1.000  | 0.59                | 20.31 %                     | 0.00 %                     | 56.73 %                      | 22.95 %                     | Stomach pH |
| 1.200  | 0.66                | 17.91 %                     | 0.00 %                     | 50.02 %                      | 32.07 %                     |            |
| 2.000  | 1.15                | 6.63 %                      | 0.01 %                     | 18.50 %                      | 74.87 %                     |            |
| 3.000  | 2.06                | 0.86 %                      | 0.01 %                     | 2.39 %                       | 96.74 %                     |            |
| 4.000  | 3.02                | 0.09 %                      | 0.01 %                     | 0.25 %                       | 99.66 %                     |            |
| 5.000  | 3.77                | 0.01 %                      | 0.01 %                     | 0.02 %                       | 99.96 %                     | Blood pH   |
| 6.000  | 4.04                | 0.00 %                      | 0.01 %                     | 0.00 %                       | 99.99 %                     |            |
| 6.500  | 4.07                | 0.00 %                      | 0.01 %                     | 0.00 %                       | 99.99 %                     |            |
| 7.000  | 4.08                | 0.00 %                      | 0.01 %                     | 0.00 %                       | 99.99 %                     |            |
| 7.400  | 4.08                | 0.00 %                      | 0.01 %                     | 0.00 %                       | 99.99 %                     |            |
| 8.000  | 4.08                | 0.00 %                      | 0.01 %                     | 0.00 %                       | 99.99 %                     |            |
| 9.000  | 4.08                | 0.00 %                      | 0.01 %                     | 0.00 %                       | 99.99 %                     |            |
| 10.000 | 4.08                | 0.00 %                      | 0.01 %                     | 0.00 %                       | 99.99 %                     |            |
| 11.000 | 4.08                | 0.00 %                      | 0.01 %                     | 0.00 %                       | 99.99 %                     |            |
| 12.000 | 4.08                | 0.00 %                      | 0.01 %                     | 0.00 %                       | 99.99 %                     |            |

Sample name: **M02\_octanol**  
 Assay name: **pH-metric high logP**  
 Assay ID: **18C-03011**  
 Filename: **C:\Sirius\_T3\Mehtap\20180302\_exp29\_logP\_T3-2\18C-03011\_M02\_octanol\_pH-metric high logP.t3r**

Experiment start time: **3/3/2018 1:46:01 PM**  
 Analyst: **Dorothy Levorse**  
 Instrument ID: **T312060**

## Graphs

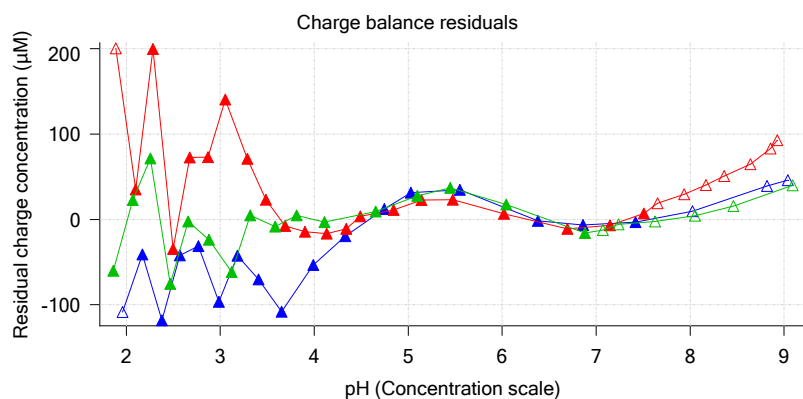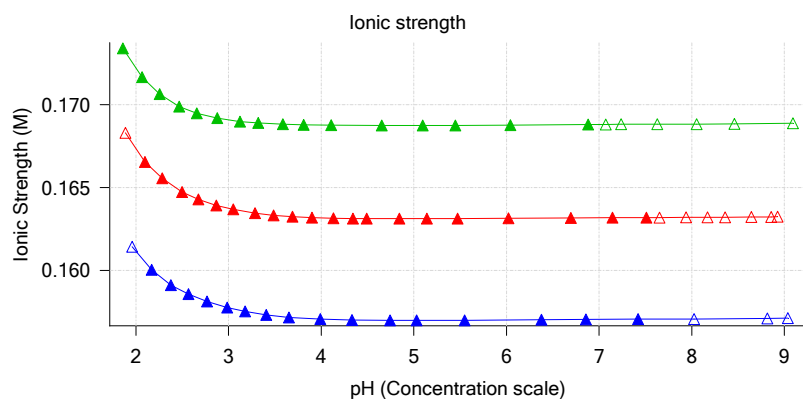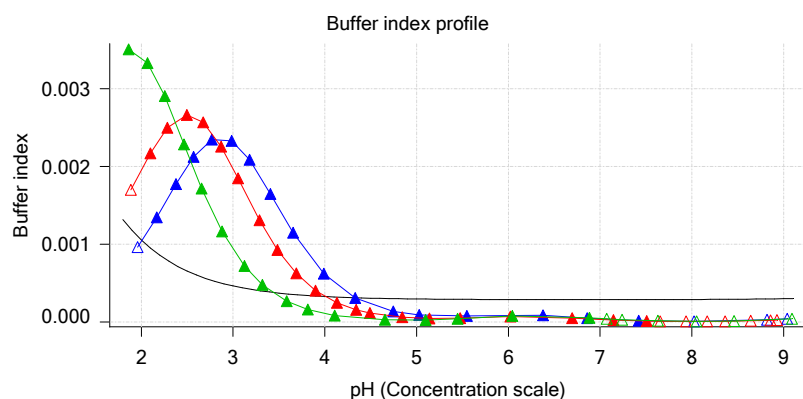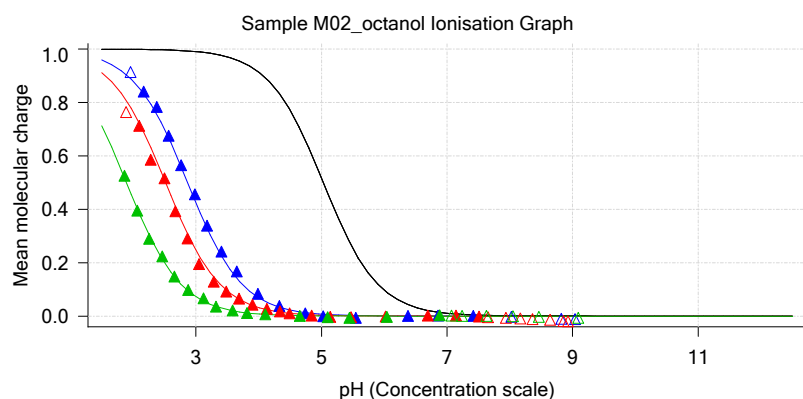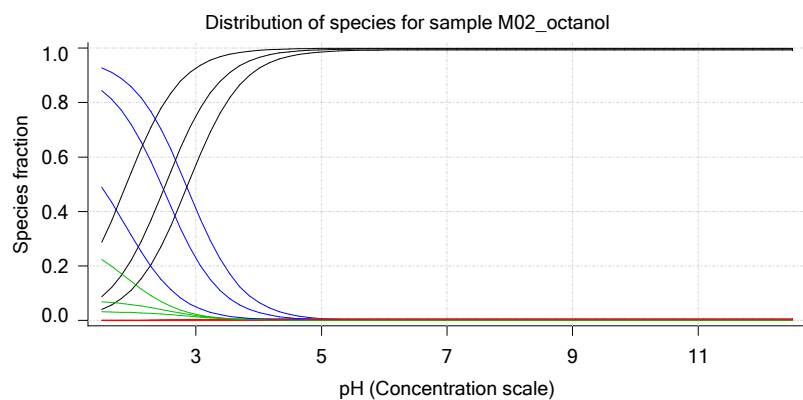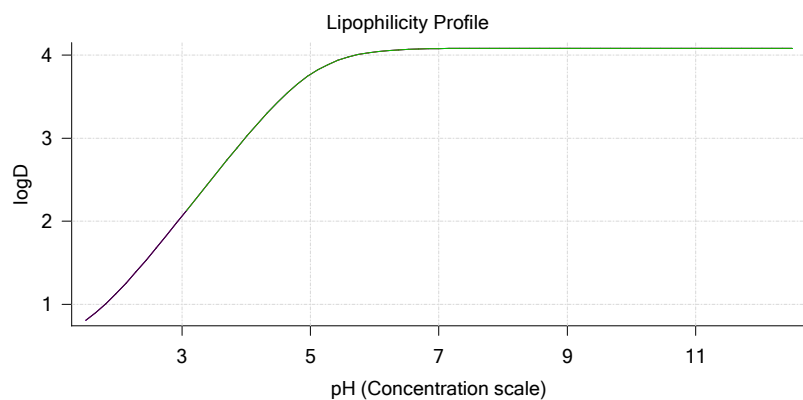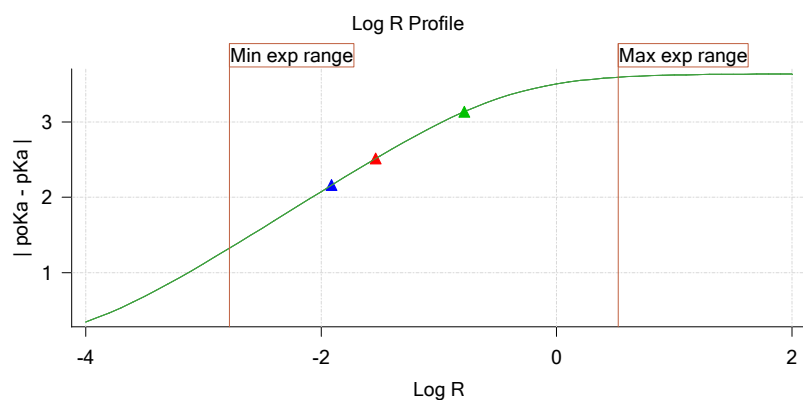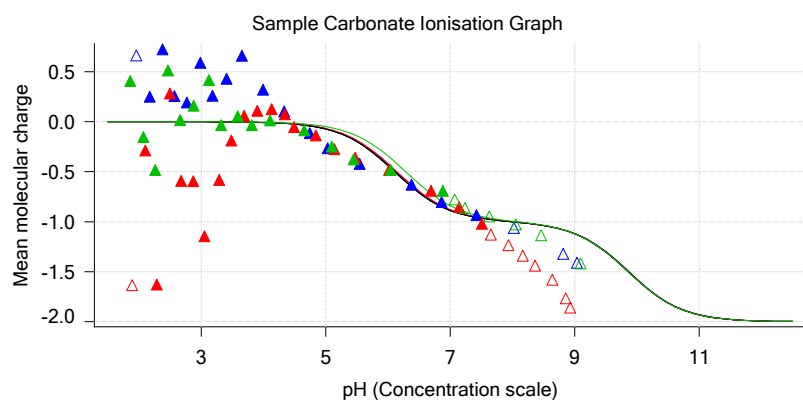

|              |                                                                                                   |                        |                            |
|--------------|---------------------------------------------------------------------------------------------------|------------------------|----------------------------|
| Sample name: | <b>M02_octanol</b>                                                                                | Experiment start time: | <b>3/3/2018 1:46:01 PM</b> |
| Assay name:  | <b>pH-metric high logP</b>                                                                        | Analyst:               | <b>Dorothy Levorse</b>     |
| Assay ID:    | <b>18C-03011</b>                                                                                  | Instrument ID:         | <b>T312060</b>             |
| Filename:    | <b>C:\Sirius_T3\Mehtap\20180302_exp29_logP_T3-2\18C-03011_M02_octanol_pH-metric high logP.t3r</b> |                        |                            |

## Graphs (continued)

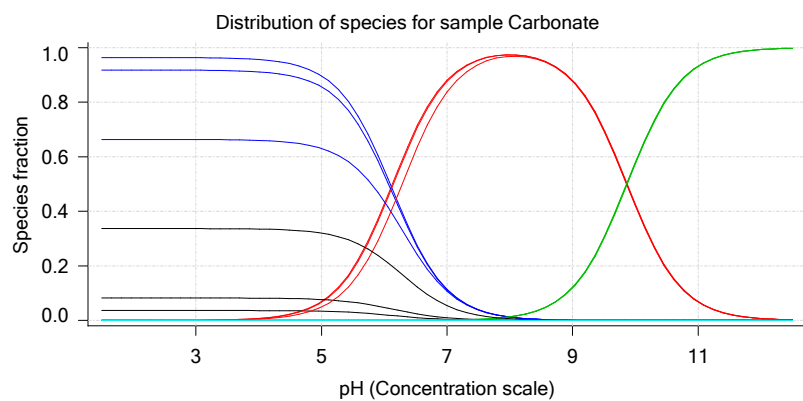

Sample name: **M02\_octanol**  
 Assay name: **pH-metric high logP**  
 Assay ID: **18C-03011**  
 Filename: **C:\Sirius\_T3\Mehtap\20180302\_exp29\_logP\_T3-2\18C-03011\_M02\_octanol\_pH-metric high logP.t3r**

Experiment start time: **3/3/2018 1:46:01 PM**  
 Analyst: **Dorothy Levorse**  
 Instrument ID: **T312060**

## pH-metric high logP Titration 1 of 3 18C-03011 Points 1 to 20

### Overall results

RMSD 0.135  
 Average ionic strength 0.157 M  
 Average temperature 24.9°C  
 Partition ratio 0.0123 : 1  
 Analyte concentration range 4180.2 µM to 4304.6 µM  
 Total points considered 16 of 20

### Warnings and errors

Errors None  
 Warnings Excessive acidity error present

### Four-Plus parameters

Alpha 0.111 3/3/2018 1:46:01 PM C:\Sirius\_T3\HCl18C02.t3r  
 S 0.9988 3/3/2018 1:46:01 PM C:\Sirius\_T3\HCl18C02.t3r  
 jH 1.0 3/3/2018 1:46:01 PM C:\Sirius\_T3\HCl18C02.t3r  
 jOH -0.8 3/3/2018 1:46:01 PM C:\Sirius\_T3\HCl18C02.t3r

### Titrants

0.50 M HCl 0.999058 3/3/2018 1:46:01 PM C:\Sirius\_T3\HCl18C02.t3r  
 0.50 M KOH 0.999845 3/3/2018 1:46:01 PM C:\Sirius\_T3\KOH18B27.t3r

### Sample

M02\_octanol concentration factor 0.967  
 Base pKa 1 5.03  
 logP (XH +) 1.31  
 logP (neutral X) 4.13

### Sample graphs

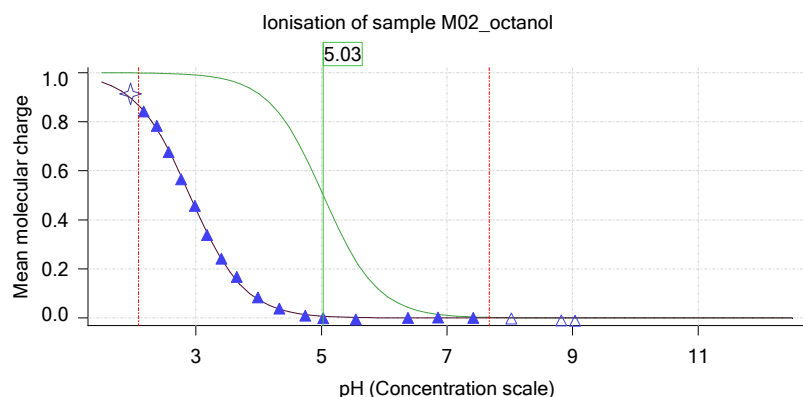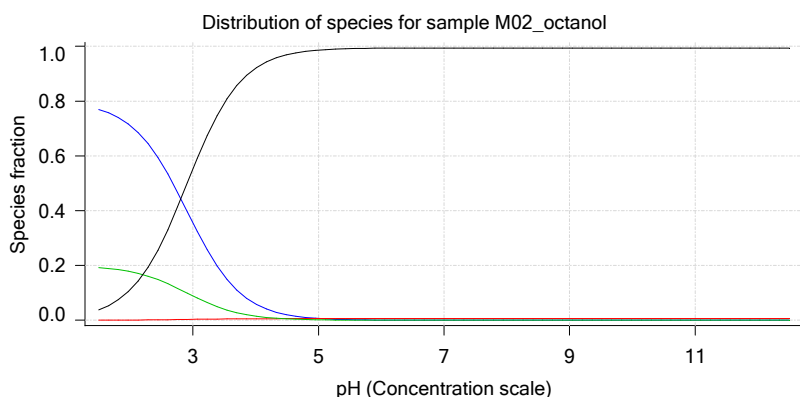

Sample name: **M02\_octanol**  
 Assay name: **pH-metric high logP**  
 Assay ID: **18C-03011**  
 Filename: **C:\Sirius\_T3\Mehtap\20180302\_exp29\_logP\_T3-2\18C-03011\_M02\_octanol\_pH-metric high logP.t3r**

Experiment start time: **3/3/2018 1:46:01 PM**  
 Analyst: **Dorothy Levorse**  
 Instrument ID: **T312060**

## Sample graphs (continued)

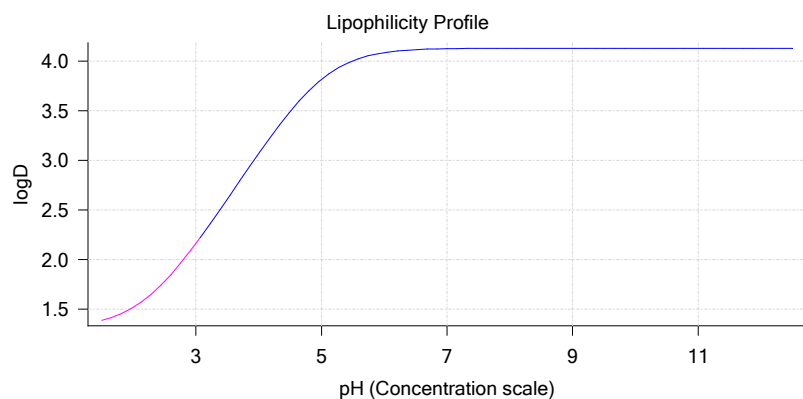

## Sample logD and percent species

| pH     | M02_octanol<br>logD | M02_octanol<br>M02_octanolH | M02_octanol<br>M02_octanolH | M02_octanol<br>M02_octanolH* | M02_octanol<br>M02_octanol* | Comment |
|--------|---------------------|-----------------------------|-----------------------------|------------------------------|-----------------------------|---------|
| 1.000  | 1.33                | 79.02 %                     | 0.01 %                      | 19.74 %                      | 1.22 %                      |         |
| 1.200  | 1.35                | 78.46 %                     | 0.01 %                      | 19.60 %                      | 1.93 %                      |         |
| 2.000  | 1.52                | 71.14 %                     | 0.07 %                      | 17.77 %                      | 11.02 %                     |         |
| 3.000  | 2.16                | 35.60 %                     | 0.33 %                      | 8.90 %                       | 55.17 %                     |         |
| 4.000  | 3.07                | 5.94 %                      | 0.55 %                      | 1.48 %                       | 92.02 %                     |         |
| 5.000  | 3.82                | 0.64 %                      | 0.59 %                      | 0.16 %                       | 98.61 %                     |         |
| 6.000  | 4.09                | 0.06 %                      | 0.60 %                      | 0.02 %                       | 99.32 %                     |         |
| 6.500  | 4.12                | 0.02 %                      | 0.60 %                      | 0.01 %                       | 99.38 %                     |         |
| 7.000  | 4.13                | 0.01 %                      | 0.60 %                      | 0.00 %                       | 99.39 %                     |         |
| 7.400  | 4.13                | 0.00 %                      | 0.60 %                      | 0.00 %                       | 99.40 %                     |         |
| 8.000  | 4.13                | 0.00 %                      | 0.60 %                      | 0.00 %                       | 99.40 %                     |         |
| 9.000  | 4.13                | 0.00 %                      | 0.60 %                      | 0.00 %                       | 99.40 %                     |         |
| 10.000 | 4.13                | 0.00 %                      | 0.60 %                      | 0.00 %                       | 99.40 %                     |         |
| 11.000 | 4.13                | 0.00 %                      | 0.60 %                      | 0.00 %                       | 99.40 %                     |         |
| 12.000 | 4.13                | 0.00 %                      | 0.60 %                      | 0.00 %                       | 99.40 %                     |         |

## Carbonate and acidity

Carbonate 0.163 mM  
 Acidity error -1.499 mM

## Other graphs

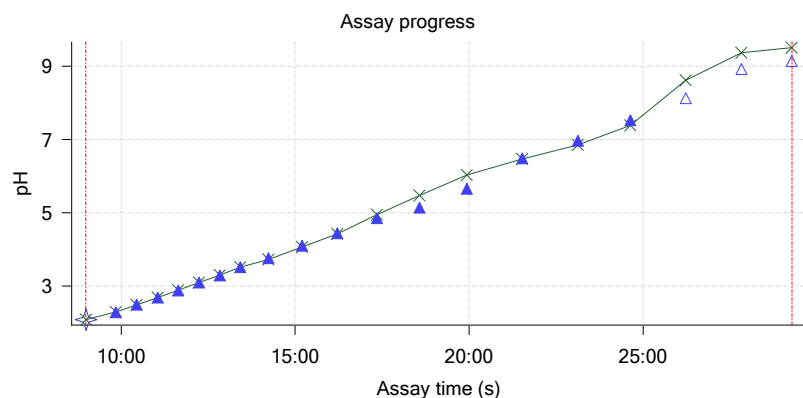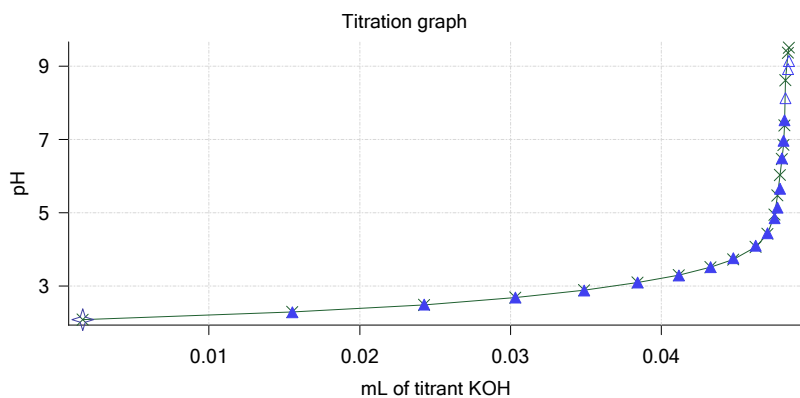

Sample name: **M02\_octanol**  
 Assay name: **pH-metric high logP**  
 Assay ID: **18C-03011**  
 Filename: **C:\Sirius\_T3\Mehtap\20180302\_exp29\_logP\_T3-2\18C-03011\_M02\_octanol\_pH-metric high logP.t3r**

Experiment start time: **3/3/2018 1:46:01 PM**  
 Analyst: **Dorothy Levorse**  
 Instrument ID: **T312060**

## Other graphs (continued)

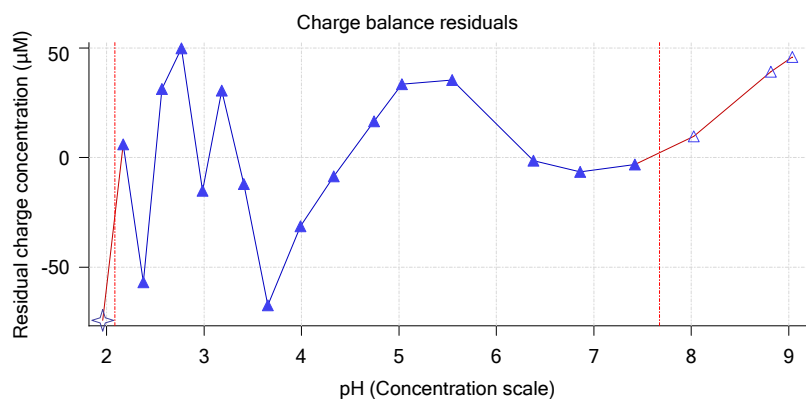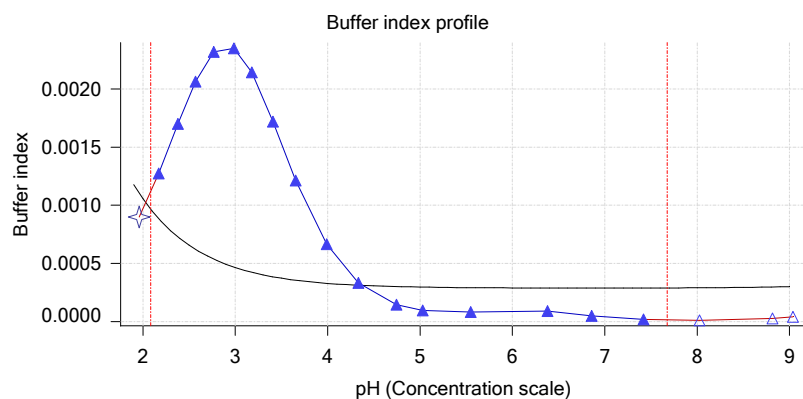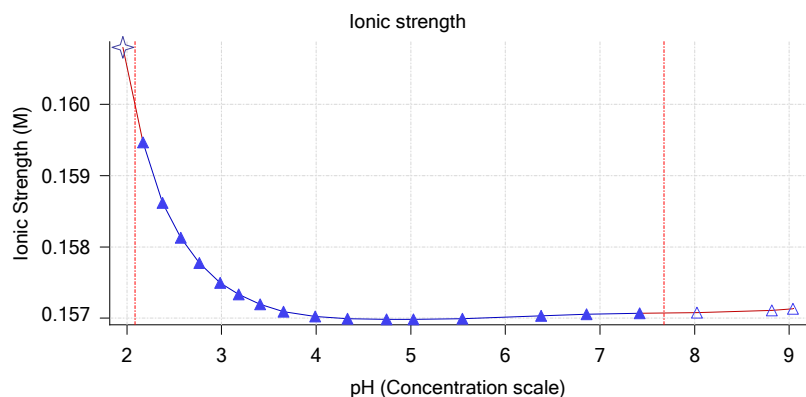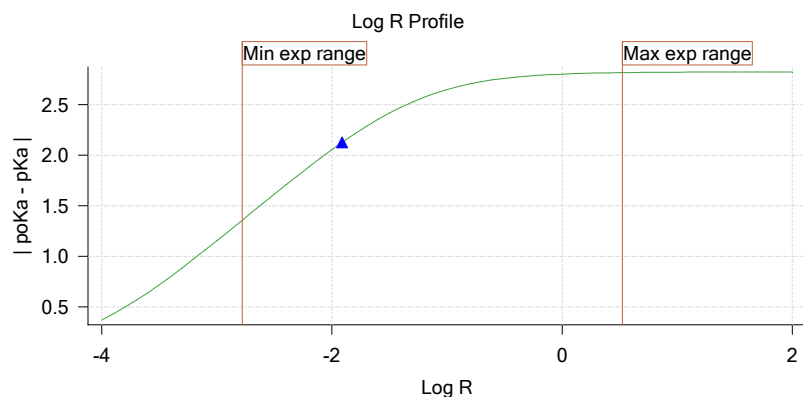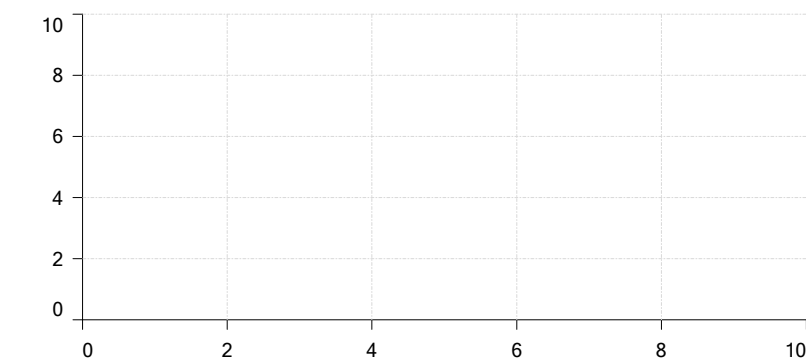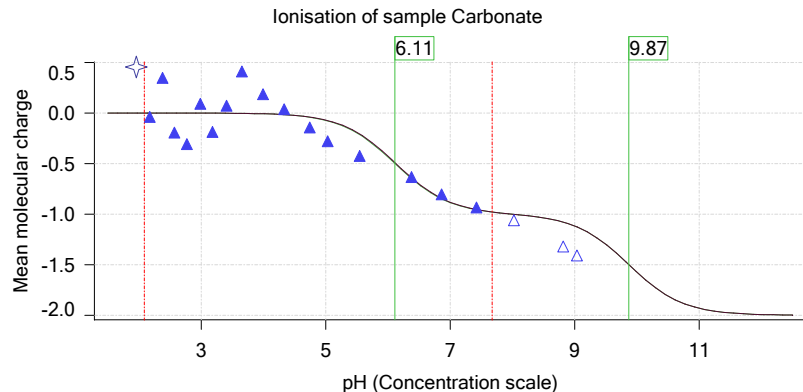

Sample name: **M02\_octanol**  
 Assay name: **pH-metric high logP**  
 Assay ID: **18C-03011**  
 Filename: **C:\Sirius\_T3\Mehtap\20180302\_exp29\_logP\_T3-2\18C-03011\_M02\_octanol\_pH-metric high logP.t3r**

Experiment start time: **3/3/2018 1:46:01 PM**  
 Analyst: **Dorothy Levorse**  
 Instrument ID: **T312060**

pH-metric high logP Titration 2 of 3 18C-03011 Points 21 to 48

## Overall results

RMSD 0.183  
 Average ionic strength 0.163 M  
 Average temperature 25.0°C  
 Partition ratio 0.0290 : 1  
 Analyte concentration range 3843.8 µM to 3969.0 µM  
 Total points considered 20 of 28

## Warnings and errors

Errors None  
 Warnings Excessive acidity error present

## Four-Plus parameters

Alpha 0.111 3/3/2018 1:46:01 PM C:\Sirius\_T3\HCl18C02.t3r  
 S 0.9988 3/3/2018 1:46:01 PM C:\Sirius\_T3\HCl18C02.t3r  
 jH 1.0 3/3/2018 1:46:01 PM C:\Sirius\_T3\HCl18C02.t3r  
 jOH -0.8 3/3/2018 1:46:01 PM C:\Sirius\_T3\HCl18C02.t3r

## Titrants

0.50 M HCl 0.999058 3/3/2018 1:46:01 PM C:\Sirius\_T3\HCl18C02.t3r  
 0.50 M KOH 0.999845 3/3/2018 1:46:01 PM C:\Sirius\_T3\KOH18B27.t3r

## Sample

M02\_octanol concentration factor 1.157  
 Base pKa 1 5.03  
 logP (XH +) 1.35  
 logP (neutral X) 4.30

## Sample graphs

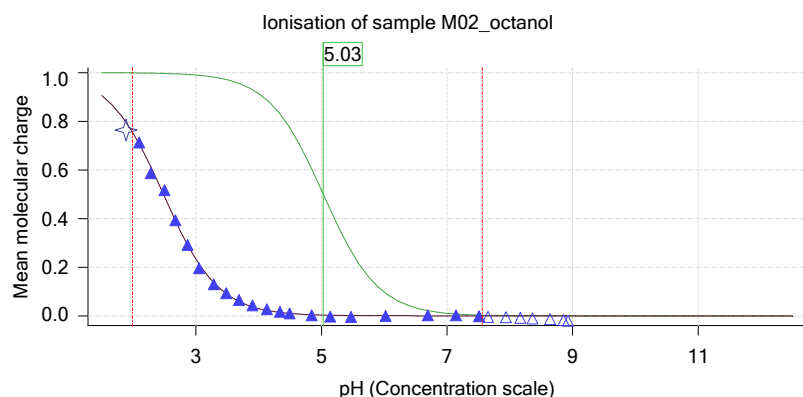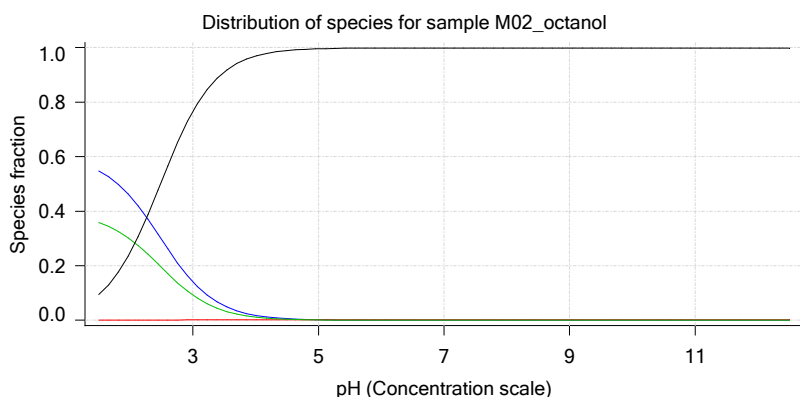

Sample name: **M02\_octanol**  
Assay name: **pH-metric high logP**  
Assay ID: **18C-03011**  
Filename: **C:\Sirius\_T3\Mehtap\20180302\_exp29\_logP\_T3-2\18C-03011\_M02\_octanol\_pH-metric high logP.t3r**

Experiment start time: **3/3/2018 1:46:01 PM**  
Analyst: **Dorothy Levorse**  
Instrument ID: **T312060**

## Sample graphs (continued)

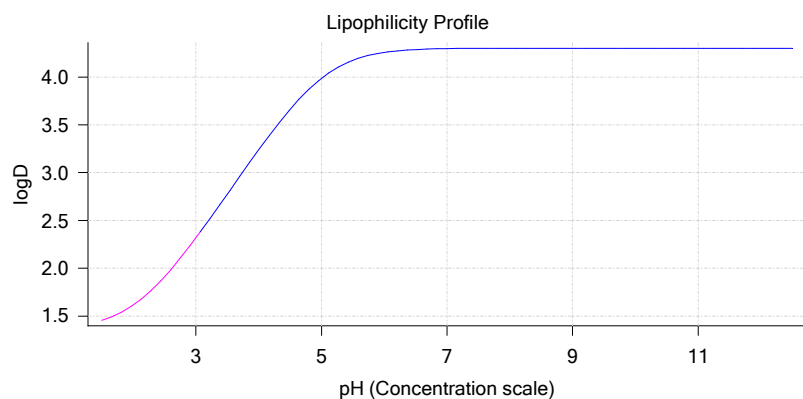

## Sample logD and percent species

| pH     | M02_octanol<br>logD | M02_octanol<br>M02_octanolH | M02_octanol<br>M02_octanol | M02_octanol<br>M02_octanolH* | M02_octanol<br>M02_octanol* | Comment    |
|--------|---------------------|-----------------------------|----------------------------|------------------------------|-----------------------------|------------|
| 1.000  | 1.39                | 58.55 %                     | 0.01 %                     | 38.26 %                      | 3.18 %                      | Stomach pH |
| 1.200  | 1.41                | 57.48 %                     | 0.01 %                     | 37.56 %                      | 4.95 %                      |            |
| 2.000  | 1.61                | 45.50 %                     | 0.04 %                     | 29.73 %                      | 24.72 %                     |            |
| 3.000  | 2.32                | 14.10 %                     | 0.13 %                     | 9.21 %                       | 76.56 %                     |            |
| 4.000  | 3.24                | 1.78 %                      | 0.17 %                     | 1.17 %                       | 96.88 %                     |            |
| 5.000  | 3.99                | 0.18 %                      | 0.17 %                     | 0.12 %                       | 99.53 %                     | Blood pH   |
| 6.000  | 4.26                | 0.02 %                      | 0.17 %                     | 0.01 %                       | 99.80 %                     |            |
| 6.500  | 4.29                | 0.01 %                      | 0.17 %                     | 0.00 %                       | 99.82 %                     |            |
| 7.000  | 4.30                | 0.00 %                      | 0.17 %                     | 0.00 %                       | 99.83 %                     |            |
| 7.400  | 4.30                | 0.00 %                      | 0.17 %                     | 0.00 %                       | 99.83 %                     |            |
| 8.000  | 4.30                | 0.00 %                      | 0.17 %                     | 0.00 %                       | 99.83 %                     |            |
| 9.000  | 4.30                | 0.00 %                      | 0.17 %                     | 0.00 %                       | 99.83 %                     |            |
| 10.000 | 4.30                | 0.00 %                      | 0.17 %                     | 0.00 %                       | 99.83 %                     |            |
| 11.000 | 4.30                | 0.00 %                      | 0.17 %                     | 0.00 %                       | 99.83 %                     |            |
| 12.000 | 4.30                | 0.00 %                      | 0.17 %                     | 0.00 %                       | 99.83 %                     |            |

## Carbonate and acidity

Carbonate 0.123 mM  
Acidity error -1.570 mM

## Other graphs

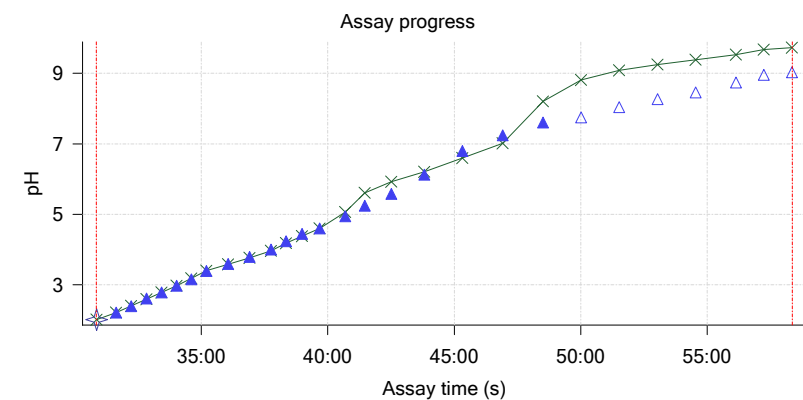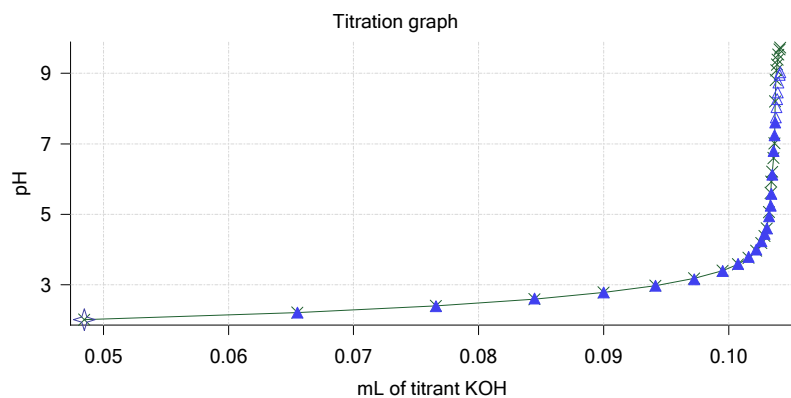



Sample name: **M02\_octanol**  
 Assay name: **pH-metric high logP**  
 Assay ID: **18C-03011**  
 Filename: **C:\Sirius\_T3\Mehtap\20180302\_exp29\_logP\_T3-2\18C-03011\_M02\_octanol\_pH-metric high logP.t3r**

Experiment start time: **3/3/2018 1:46:01 PM**  
 Analyst: **Dorothy Levorse**  
 Instrument ID: **T312060**

## Other graphs (continued)

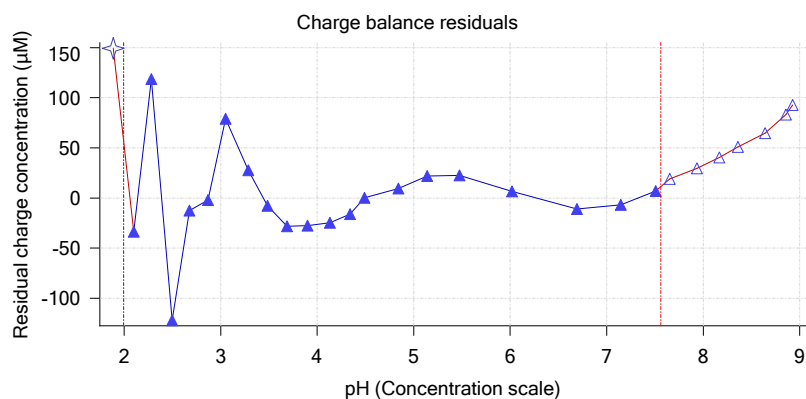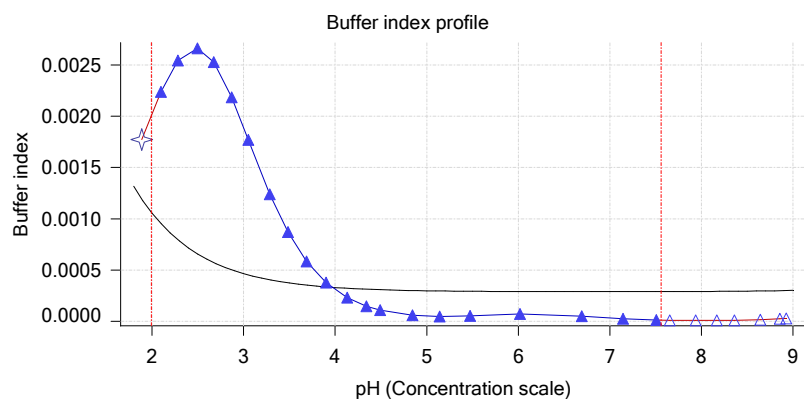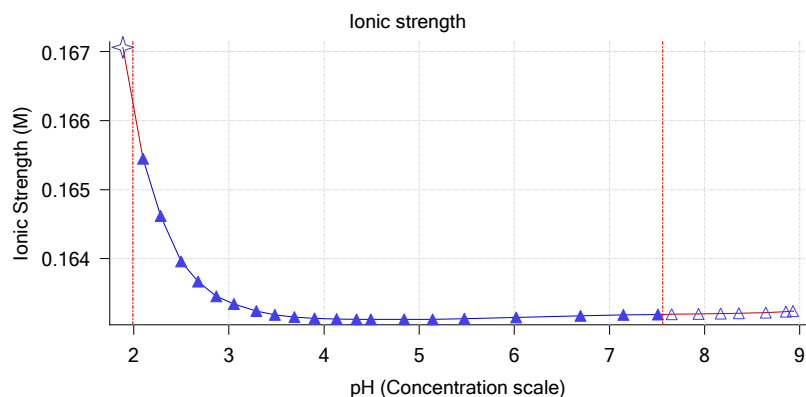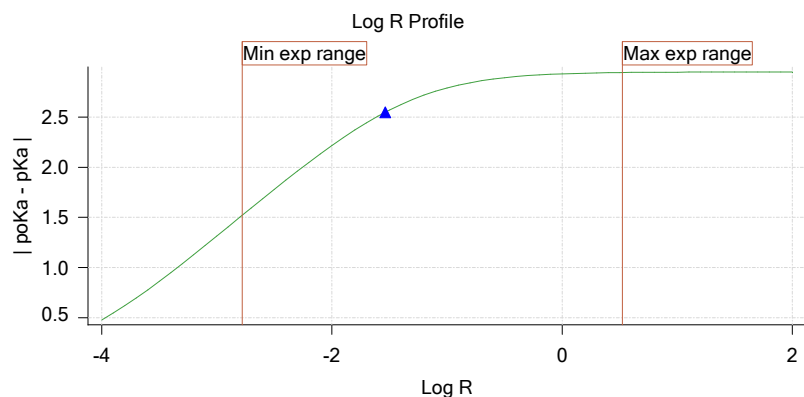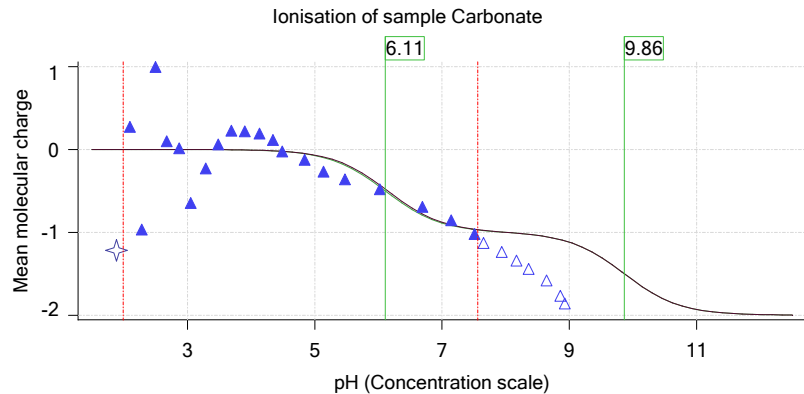

Sample name: **M02\_octanol**  
 Assay name: **pH-metric high logP**  
 Assay ID: **18C-03011**  
 Filename: **C:\Sirius\_T3\Mehtap\20180302\_exp29\_logP\_T3-2\18C-03011\_M02\_octanol\_pH-metric high logP.t3r**

Experiment start time: **3/3/2018 1:46:01 PM**  
 Analyst: **Dorothy Levorse**  
 Instrument ID: **T312060**

pH-metric high logP Titration 3 of 3 18C-03011 Points 49 to 70

## Overall results

RMSD 0.256  
 Average ionic strength 0.169 M  
 Average temperature 25.0°C  
 Partition ratio 0.1643 : 1  
 Analyte concentration range 3175.3 µM to 3268.6 µM  
 Total points considered 16 of 22

## Warnings and errors

Errors None  
 Warnings Sample concentration factor out of range  
 Excessive acidity error present

## Four-Plus parameters

 Alpha 0.111 3/3/2018 1:46:01 PM C:\Sirius\_T3\HCl18C02.t3r  
 S 0.9988 3/3/2018 1:46:01 PM C:\Sirius\_T3\HCl18C02.t3r  
 jH 1.0 3/3/2018 1:46:01 PM C:\Sirius\_T3\HCl18C02.t3r  
 jOH -0.8 3/3/2018 1:46:01 PM C:\Sirius\_T3\HCl18C02.t3r

## Titrants

 0.50 M HCl 0.999058 3/3/2018 1:46:01 PM C:\Sirius\_T3\HCl18C02.t3r  
 0.50 M KOH 0.999845 3/3/2018 1:46:01 PM C:\Sirius\_T3\KOH18B27.t3r

## Sample

 M02\_octanol concentration factor 1.597  
 Base pKa 1 5.03  
 logP (XH +) 1.32  
 logP (neutral X) 4.56

## Sample graphs

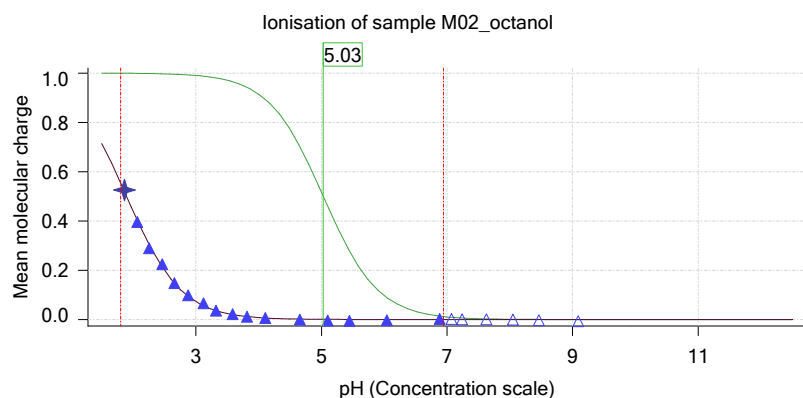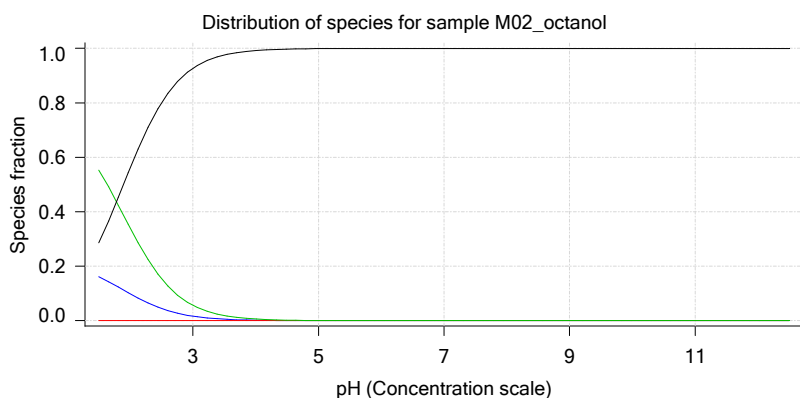

Sample name: **M02\_octanol**  
 Assay name: **pH-metric high logP**  
 Assay ID: **18C-03011**  
 Filename: **C:\Sirius\_T3\Mehtap\20180302\_exp29\_logP\_T3-2\18C-03011\_M02\_octanol\_pH-metric high logP.t3r**

Experiment start time: **3/3/2018 1:46:01 PM**  
 Analyst: **Dorothy Levorse**  
 Instrument ID: **T312060**

## Sample graphs (continued)

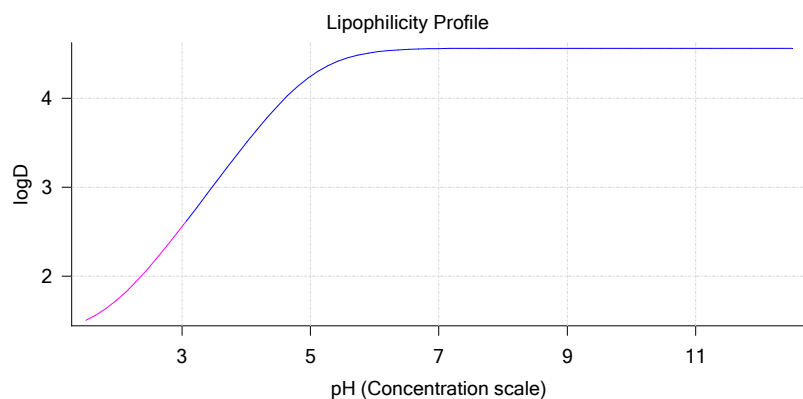

## Sample logD and percent species

| pH     | M02_octanol<br>logD | M02_octanol<br>M02_octanolH | M02_octanol<br>M02_octanolH | M02_octanol<br>M02_octanolH* | M02_octanol<br>M02_octanol* | Comment    |
|--------|---------------------|-----------------------------|-----------------------------|------------------------------|-----------------------------|------------|
| 1.000  | 1.39                | 20.02 %                     | 0.00 %                      | 68.72 %                      | 11.26 %                     | Stomach pH |
| 1.200  | 1.42                | 18.78 %                     | 0.00 %                      | 64.47 %                      | 16.75 %                     |            |
| 2.000  | 1.74                | 9.94 %                      | 0.01 %                      | 34.13 %                      | 55.92 %                     |            |
| 3.000  | 2.56                | 1.65 %                      | 0.02 %                      | 5.66 %                       | 92.68 %                     |            |
| 4.000  | 3.50                | 0.18 %                      | 0.02 %                      | 0.61 %                       | 99.20 %                     |            |
| 5.000  | 4.25                | 0.02 %                      | 0.02 %                      | 0.06 %                       | 99.90 %                     | Blood pH   |
| 6.000  | 4.52                | 0.00 %                      | 0.02 %                      | 0.01 %                       | 99.98 %                     |            |
| 6.500  | 4.55                | 0.00 %                      | 0.02 %                      | 0.00 %                       | 99.98 %                     |            |
| 7.000  | 4.56                | 0.00 %                      | 0.02 %                      | 0.00 %                       | 99.98 %                     |            |
| 7.400  | 4.56                | 0.00 %                      | 0.02 %                      | 0.00 %                       | 99.98 %                     |            |
| 8.000  | 4.56                | 0.00 %                      | 0.02 %                      | 0.00 %                       | 99.98 %                     |            |
| 9.000  | 4.56                | 0.00 %                      | 0.02 %                      | 0.00 %                       | 99.98 %                     |            |
| 10.000 | 4.56                | 0.00 %                      | 0.02 %                      | 0.00 %                       | 99.98 %                     |            |
| 11.000 | 4.56                | 0.00 %                      | 0.02 %                      | 0.00 %                       | 99.98 %                     |            |
| 12.000 | 4.56                | 0.00 %                      | 0.02 %                      | 0.00 %                       | 99.98 %                     |            |

## Carbonate and acidity

Carbonate 0.148 mM  
 Acidity error -1.252 mM

## Other graphs

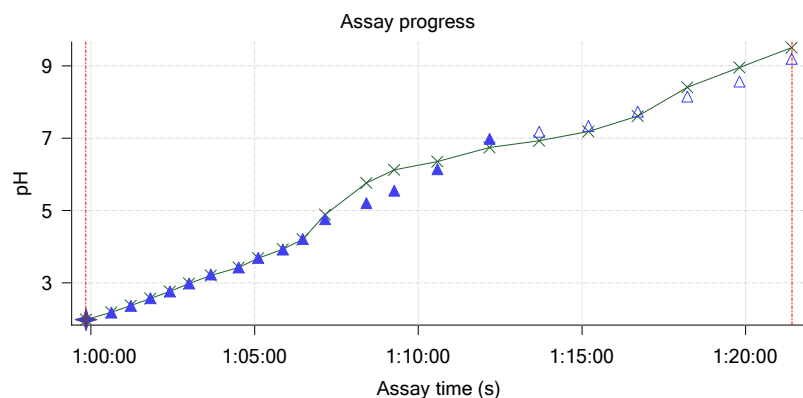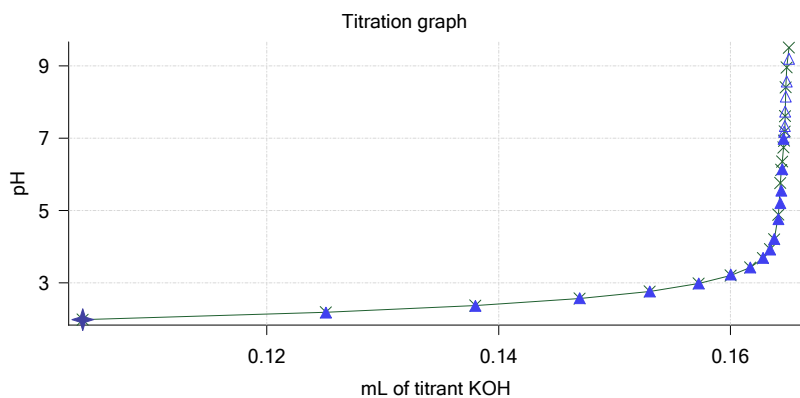

Sample name: **M02\_octanol**  
 Assay name: **pH-metric high logP**  
 Assay ID: **18C-03011**  
 Filename: **C:\Sirius\_T3\Mehtap\20180302\_exp29\_logP\_T3-2\18C-03011\_M02\_octanol\_pH-metric high logP.t3r**

Experiment start time: **3/3/2018 1:46:01 PM**  
 Analyst: **Dorothy Levorse**  
 Instrument ID: **T312060**

## Other graphs (continued)

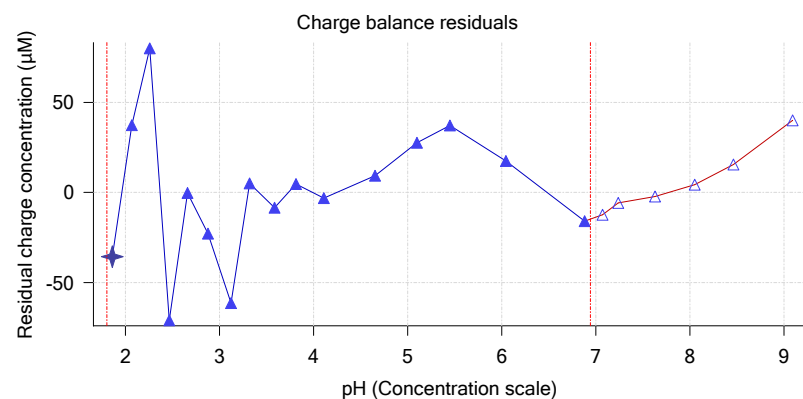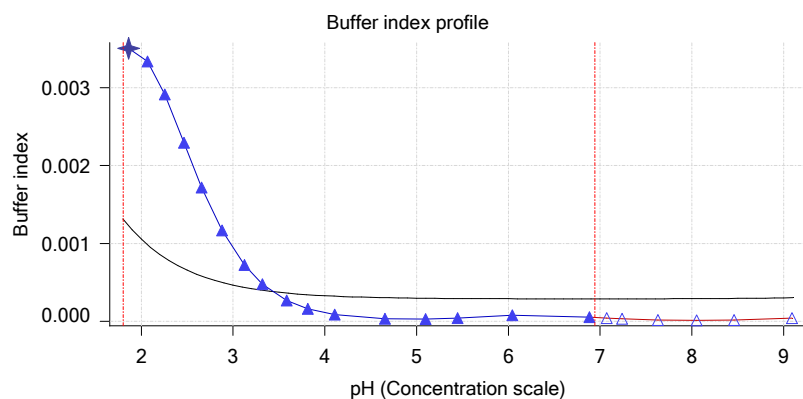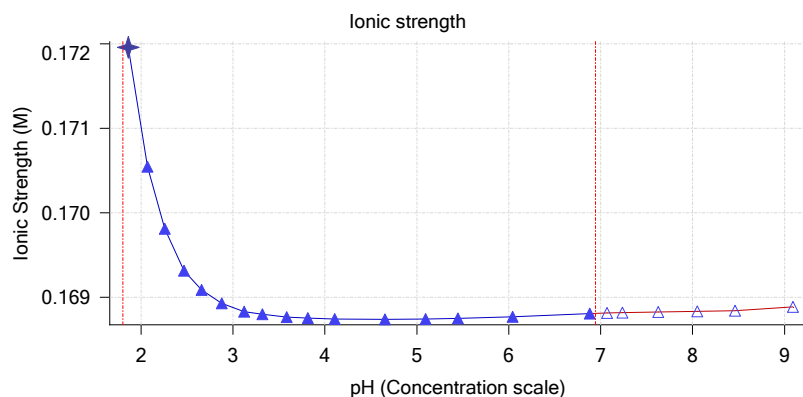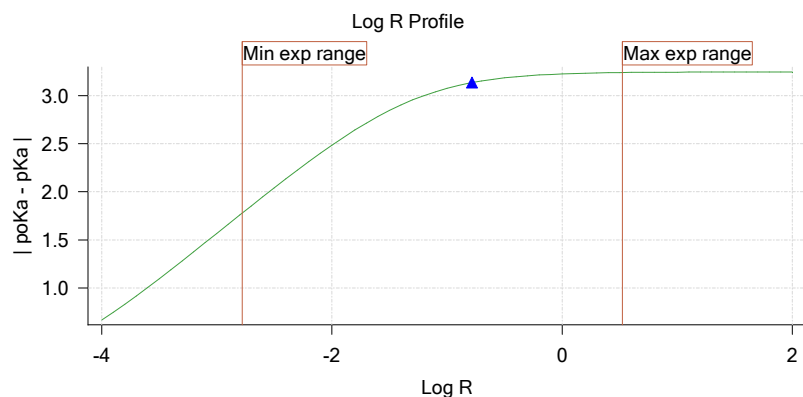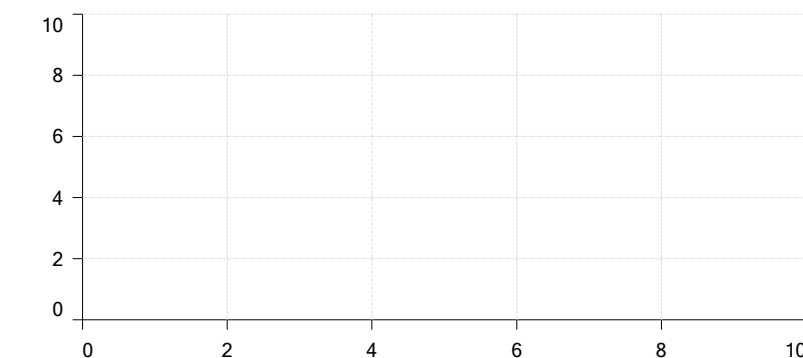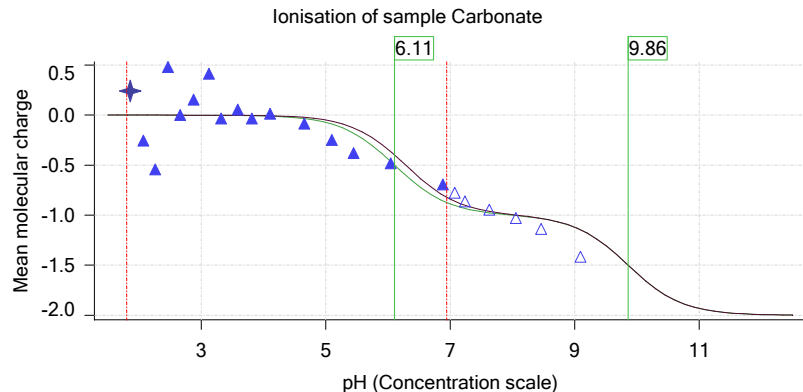

Sample name: **M02\_octanol**  
 Assay name: **pH-metric high logP**  
 Assay ID: **18C-03011**  
 Filename: **C:\Sirius\_T3\Mehtap\20180302\_exp29\_logP\_T3-2\18C-03011\_M02\_octanol\_pH-metric high logP.t3r**

Experiment start time: **3/3/2018 1:46:01 PM**  
 Analyst: **Dorothy Levorse**  
 Instrument ID: **T312060**

## Assay Model

| Settings                          | Value        | Date/Time changed    | Imported from      |
|-----------------------------------|--------------|----------------------|--------------------|
| Sample name                       | M02_octanol  | 12/6/2017 4:20:03 PM | User entered value |
| Sample by                         | Weight       |                      | Default value      |
| Sample weight                     | 0.001960 g   | 3/2/2018 5:09:57 PM  | User entered value |
| Formula weight                    | 289.26 g/mol | 12/6/2017 4:20:03 PM | User entered value |
| Solubility                        | Unknown      |                      | Default value      |
| Molecular weight                  | 289.26       | 12/6/2017 4:20:03 PM | User entered value |
| Individual pKa ionic environments | No           |                      | Default value      |
| Number of pKas                    | 1            | 12/6/2017 4:20:03 PM | User entered value |
| Sample is a                       | Base         | 12/6/2017 4:20:03 PM | User entered value |
| pKa 1                             | 5.03         | 12/6/2017 4:20:03 PM | User entered value |
| logp (XH +)                       | 1.32         | 3/2/2018 3:38:13 PM  | User entered value |
| logP (neutral X)                  | 4.10         | 3/2/2018 3:38:07 PM  | User entered value |

## Events

| Time    | Event             | Water      | Acid       | Base       | Octanol    | pH    | dpH/dt   | pH R-squared | pH SD   | dpH/dt time         |
|---------|-------------------|------------|------------|------------|------------|-------|----------|--------------|---------|---------------------|
| 6:00.1  | Initial pH = 8.70 |            |            |            |            |       |          |              |         |                     |
| 8:59.7  | Data point 1      | 1.50000 mL | 0.05252 mL | 0.00162 mL | 0.01999 mL | 2.078 | 0.01636  | 0.75364      | 0.00093 | 15.0 s              |
| 9:50.7  | Data point 2      | 1.50000 mL | 0.05252 mL | 0.01552 mL | 0.01999 mL | 2.285 | -0.01511 | 0.81500      | 0.00083 | 10.5 s              |
| 10:26.8 | Data point 3      | 1.50000 mL | 0.05252 mL | 0.02427 mL | 0.01999 mL | 2.490 | -0.00148 | 0.44552      | 0.00011 | 10.5 s              |
| 11:02.9 | Data point 4      | 1.50000 mL | 0.05252 mL | 0.03032 mL | 0.01999 mL | 2.678 | -0.00348 | 0.65646      | 0.00021 | 10.0 s              |
| 11:38.4 | Data point 5      | 1.50000 mL | 0.05252 mL | 0.03488 mL | 0.01999 mL | 2.876 | -0.01455 | 0.84506      | 0.00078 | 10.0 s              |
| 12:13.9 | Data point 6      | 1.50000 mL | 0.05252 mL | 0.03843 mL | 0.01999 mL | 3.094 | -0.01527 | 0.85358      | 0.00082 | 10.5 s              |
| 12:49.9 | Data point 7      | 1.50000 mL | 0.05252 mL | 0.04116 mL | 0.01999 mL | 3.288 | -0.01663 | 0.96111      | 0.00084 | 10.0 s              |
| 13:25.4 | Data point 8      | 1.50000 mL | 0.05252 mL | 0.04327 mL | 0.01999 mL | 3.515 | -0.01850 | 0.86172      | 0.00098 | 23.0 s              |
| 14:13.9 | Data point 9      | 1.50000 mL | 0.05252 mL | 0.04478 mL | 0.01999 mL | 3.760 | -0.01848 | 0.86901      | 0.00098 | 17.0 s              |
| 15:11.8 | Data point 10     | 1.50000 mL | 0.05252 mL | 0.04626 mL | 0.01999 mL | 4.096 | -0.01860 | 0.90784      | 0.00096 | 20.0 s              |
| 16:12.8 | Data point 11     | 1.50000 mL | 0.05252 mL | 0.04704 mL | 0.01999 mL | 4.437 | -0.01860 | 0.90771      | 0.00096 | 37.5 s              |
| 17:20.9 | Data point 12     | 1.50000 mL | 0.05252 mL | 0.04751 mL | 0.01999 mL | 4.850 | -0.01809 | 0.87203      | 0.00096 | 43.0 s              |
| 18:34.5 | Data point 13     | 1.50000 mL | 0.05252 mL | 0.04770 mL | 0.01999 mL | 5.134 | -0.01884 | 0.90212      | 0.00098 | 51.0 s              |
| 19:56.1 | Data point 14     | 1.50000 mL | 0.05252 mL | 0.04786 mL | 0.01999 mL | 5.651 | -0.02196 | 0.93556      | 0.00112 | Timed out at 59.5 s |
| 21:31.8 | Data point 15     | 1.50000 mL | 0.05252 mL | 0.04800 mL | 0.01999 mL | 6.482 | -0.04707 | 0.98476      | 0.00234 | Timed out at 59.5 s |
| 23:07.4 | Data point 16     | 1.50000 mL | 0.05252 mL | 0.04809 mL | 0.01999 mL | 6.961 | -0.05553 | 0.98035      | 0.00277 | Timed out at 59.5 s |
| 24:38.0 | Data point 17     | 1.50000 mL | 0.05252 mL | 0.04817 mL | 0.01999 mL | 7.521 | -0.08676 | 0.99361      | 0.00430 | Timed out at 59.5 s |
| 26:13.5 | Data point 18     | 1.50000 mL | 0.05252 mL | 0.04824 mL | 0.01999 mL | 8.125 | -0.07978 | 0.98996      | 0.00396 | Timed out at 59.5 s |
| 27:49.3 | Data point 19     | 1.50000 mL | 0.05252 mL | 0.04840 mL | 0.01999 mL | 8.917 | -0.01848 | 0.88522      | 0.00097 | 56.0 s              |
| 29:15.8 | Data point 20     | 1.50000 mL | 0.05252 mL | 0.04847 mL | 0.01999 mL | 9.138 | -0.01766 | 0.91576      | 0.00091 | 37.0 s              |
| 30:51.7 | Data point 21     | 1.50000 mL | 0.10875 mL | 0.04847 mL | 0.05000 mL | 2.009 | -0.00919 | 0.60040      | 0.00059 | 10.0 s              |
| 31:38.0 | Data point 22     | 1.50000 mL | 0.10875 mL | 0.06552 mL | 0.05000 mL | 2.215 | -0.00727 | 0.64690      | 0.00045 | 10.0 s              |
| 32:13.7 | Data point 23     | 1.50000 mL | 0.10875 mL | 0.07660 mL | 0.05000 mL | 2.396 | -0.00146 | 0.31714      | 0.00013 | 10.5 s              |
| 32:49.9 | Data point 24     | 1.50000 mL | 0.10875 mL | 0.08448 mL | 0.05000 mL | 2.609 | -0.00346 | 0.43326      | 0.00026 | 10.0 s              |
| 33:25.5 | Data point 25     | 1.50000 mL | 0.10875 mL | 0.08998 mL | 0.05000 mL | 2.785 | -0.00991 | 0.29494      | 0.00090 | 10.0 s              |
| 34:01.0 | Data point 26     | 1.50000 mL | 0.10875 mL | 0.09414 mL | 0.05000 mL | 2.978 | -0.00636 | 0.79094      | 0.00035 | 10.0 s              |
| 34:36.5 | Data point 27     | 1.50000 mL | 0.10875 mL | 0.09722 mL | 0.05000 mL | 3.160 | -0.00652 | 0.78690      | 0.00036 | 10.0 s              |
| 35:11.9 | Data point 28     | 1.50000 mL | 0.10875 mL | 0.09951 mL | 0.05000 mL | 3.395 | -0.01414 | 0.94922      | 0.00072 | 10.5 s              |
| 36:03.3 | Data point 29     | 1.50000 mL | 0.10875 mL | 0.10073 mL | 0.05000 mL | 3.592 | -0.01172 | 0.70688      | 0.00069 | 10.0 s              |
| 36:54.3 | Data point 30     | 1.50000 mL | 0.10875 mL | 0.10158 mL | 0.05000 mL | 3.795 | -0.01307 | 0.64357      | 0.00080 | 10.0 s              |
| 37:45.1 | Data point 31     | 1.50000 mL | 0.10875 mL | 0.10219 mL | 0.05000 mL | 4.005 | -0.01735 | 0.75875      | 0.00098 | 10.5 s              |
| 38:21.1 | Data point 32     | 1.50000 mL | 0.10875 mL | 0.10261 mL | 0.05000 mL | 4.238 | -0.01660 | 0.84161      | 0.00089 | 12.5 s              |
| 38:59.1 | Data point 33     | 1.50000 mL | 0.10875 mL | 0.10287 mL | 0.05000 mL | 4.447 | -0.01934 | 0.93729      | 0.00099 | 16.0 s              |
| 39:40.4 | Data point 34     | 1.50000 mL | 0.10875 mL | 0.10303 mL | 0.05000 mL | 4.596 | -0.01901 | 0.88676      | 0.00100 | 30.5 s              |
| 40:41.5 | Data point 35     | 1.50000 mL | 0.10875 mL | 0.10322 mL | 0.05000 mL | 4.948 | -0.01691 | 0.77907      | 0.00095 | 16.0 s              |

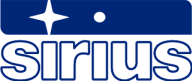

## Assay Events

Sample name: **M02\_octanol**  
Assay name: **pH-metric high logP**  
Assay ID: **18C-03011**  
Filename: **C:\Sirius\_T3\Mehtap\20180302\_exp29\_logP\_T3-2\18C-03011\_M02\_octanol\_pH-metric high logP.t3r**

Experiment start time: **3/3/2018 1:46:01 PM**  
Analyst: **Dorothy Levorse**  
Instrument ID: **T312060**

## Events (continued)

| Time      | Event         | Water      | Acid       | Base       | Octanol    | pH    | dpH/dt   | pH R-squared | pH SD   | dpH/dt time         |
|-----------|---------------|------------|------------|------------|------------|-------|----------|--------------|---------|---------------------|
| 41:28.0   | Data point 36 | 1.50000 mL | 0.10875 mL | 0.10334 mL | 0.05000 mL | 5.244 | -0.01809 | 0.82366      | 0.00098 | 32.5 s              |
| 42:31.1   | Data point 37 | 1.50000 mL | 0.10875 mL | 0.10341 mL | 0.05000 mL | 5.578 | -0.01894 | 0.89362      | 0.00099 | 47.0 s              |
| 43:48.7   | Data point 38 | 1.50000 mL | 0.10875 mL | 0.10348 mL | 0.05000 mL | 6.124 | -0.02064 | 0.93374      | 0.00106 | Timed out at 59.5 s |
| 45:19.2   | Data point 39 | 1.50000 mL | 0.10875 mL | 0.10358 mL | 0.05000 mL | 6.796 | -0.05867 | 0.98597      | 0.00292 | Timed out at 59.5 s |
| 46:54.9   | Data point 40 | 1.50000 mL | 0.10875 mL | 0.10365 mL | 0.05000 mL | 7.247 | -0.06483 | 0.98904      | 0.00322 | Timed out at 59.5 s |
| 48:30.7   | Data point 41 | 1.50000 mL | 0.10875 mL | 0.10372 mL | 0.05000 mL | 7.610 | -0.08577 | 0.99139      | 0.00426 | Timed out at 59.5 s |
| 50:01.2   | Data point 42 | 1.50000 mL | 0.10875 mL | 0.10376 mL | 0.05000 mL | 7.754 | -0.06230 | 0.98106      | 0.00311 | Timed out at 59.5 s |
| 51:31.7   | Data point 43 | 1.50000 mL | 0.10875 mL | 0.10381 mL | 0.05000 mL | 8.038 | -0.05883 | 0.98974      | 0.00292 | Timed out at 59.5 s |
| 53:02.2   | Data point 44 | 1.50000 mL | 0.10875 mL | 0.10386 mL | 0.05000 mL | 8.269 | -0.04245 | 0.97500      | 0.00212 | Timed out at 59.5 s |
| 54:32.7   | Data point 45 | 1.50000 mL | 0.10875 mL | 0.10390 mL | 0.05000 mL | 8.461 | -0.02925 | 0.94322      | 0.00149 | Timed out at 59.5 s |
| 56:08.3   | Data point 46 | 1.50000 mL | 0.10875 mL | 0.10398 mL | 0.05000 mL | 8.742 | -0.01524 | 0.61499      | 0.00096 | 30.5 s              |
| 57:14.5   | Data point 47 | 1.50000 mL | 0.10875 mL | 0.10407 mL | 0.05000 mL | 8.956 | -0.01863 | 0.86242      | 0.00099 | 36.0 s              |
| 58:21.1   | Data point 48 | 1.50000 mL | 0.10875 mL | 0.10412 mL | 0.05000 mL | 9.027 | -0.01667 | 0.74240      | 0.00096 | 26.0 s              |
| 59:51.2   | Data point 49 | 1.50000 mL | 0.16893 mL | 0.10412 mL | 0.30000 mL | 1.983 | 0.00363  | 0.07579      | 0.00065 | 10.0 s              |
| 1:00:37.5 | Data point 50 | 1.50000 mL | 0.16893 mL | 0.12509 mL | 0.30000 mL | 2.185 | -0.01327 | 0.52474      | 0.00091 | 10.0 s              |
| 1:01:13.3 | Data point 51 | 1.50000 mL | 0.16893 mL | 0.13801 mL | 0.30000 mL | 2.371 | -0.01259 | 0.50607      | 0.00087 | 10.0 s              |
| 1:01:48.9 | Data point 52 | 1.50000 mL | 0.16893 mL | 0.14699 mL | 0.30000 mL | 2.577 | -0.00872 | 0.34259      | 0.00074 | 10.0 s              |
| 1:02:24.5 | Data point 53 | 1.50000 mL | 0.16893 mL | 0.15303 mL | 0.30000 mL | 2.768 | -0.00055 | 0.00118      | 0.00079 | 10.0 s              |
| 1:02:59.9 | Data point 54 | 1.50000 mL | 0.16893 mL | 0.15727 mL | 0.30000 mL | 2.987 | -0.00399 | 0.04207      | 0.00096 | 14.5 s              |
| 1:03:39.9 | Data point 55 | 1.50000 mL | 0.16893 mL | 0.16002 mL | 0.30000 mL | 3.230 | -0.00293 | 0.03061      | 0.00083 | 10.0 s              |
| 1:04:30.9 | Data point 56 | 1.50000 mL | 0.16893 mL | 0.16169 mL | 0.30000 mL | 3.426 | 0.01036  | 0.28200      | 0.00096 | 10.0 s              |
| 1:05:06.3 | Data point 57 | 1.50000 mL | 0.16893 mL | 0.16279 mL | 0.30000 mL | 3.692 | -0.01047 | 0.32693      | 0.00090 | 15.0 s              |
| 1:05:51.9 | Data point 58 | 1.50000 mL | 0.16893 mL | 0.16340 mL | 0.30000 mL | 3.919 | -0.00471 | 0.52606      | 0.00032 | 10.5 s              |
| 1:06:27.8 | Data point 59 | 1.50000 mL | 0.16893 mL | 0.16378 mL | 0.30000 mL | 4.213 | -0.01245 | 0.91405      | 0.00064 | 10.5 s              |
| 1:07:09.1 | Data point 60 | 1.50000 mL | 0.16893 mL | 0.16414 mL | 0.30000 mL | 4.759 | -0.01882 | 0.91127      | 0.00097 | 45.0 s              |
| 1:08:24.9 | Data point 61 | 1.50000 mL | 0.16893 mL | 0.16430 mL | 0.30000 mL | 5.201 | -0.01315 | 0.55571      | 0.00087 | 15.5 s              |
| 1:09:16.0 | Data point 62 | 1.50000 mL | 0.16893 mL | 0.16439 mL | 0.30000 mL | 5.551 | -0.01841 | 0.93035      | 0.00094 | 48.5 s              |
| 1:10:35.1 | Data point 63 | 1.50000 mL | 0.16893 mL | 0.16446 mL | 0.30000 mL | 6.146 | -0.03968 | 0.91076      | 0.00205 | Timed out at 59.5 s |
| 1:12:10.7 | Data point 64 | 1.50000 mL | 0.16893 mL | 0.16458 mL | 0.30000 mL | 6.984 | -0.09924 | 0.98030      | 0.00495 | Timed out at 59.5 s |
| 1:13:41.3 | Data point 65 | 1.50000 mL | 0.16893 mL | 0.16463 mL | 0.30000 mL | 7.173 | -0.07212 | 0.97043      | 0.00362 | Timed out at 59.5 s |
| 1:15:11.8 | Data point 66 | 1.50000 mL | 0.16893 mL | 0.16467 mL | 0.30000 mL | 7.339 | -0.06600 | 0.98427      | 0.00328 | Timed out at 59.5 s |
| 1:16:42.3 | Data point 67 | 1.50000 mL | 0.16893 mL | 0.16472 mL | 0.30000 mL | 7.729 | -0.07810 | 0.99269      | 0.00387 | Timed out at 59.5 s |
| 1:18:12.8 | Data point 68 | 1.50000 mL | 0.16893 mL | 0.16477 mL | 0.30000 mL | 8.153 | -0.05661 | 0.98395      | 0.00282 | Timed out at 59.5 s |
| 1:19:48.4 | Data point 69 | 1.50000 mL | 0.16893 mL | 0.16484 mL | 0.30000 mL | 8.561 | -0.03628 | 0.93717      | 0.00185 | Timed out at 59.5 s |
| 1:21:24.0 | Data point 70 | 1.50000 mL | 0.16893 mL | 0.16505 mL | 0.30000 mL | 9.190 | -0.01034 | 0.34587      | 0.00087 | 15.0 s              |
| 1:21:48.1 | Assay volumes | 1.50000 mL | 0.16893 mL | 0.16505 mL | 0.30000 mL |       |          |              |         |                     |

Sample name: **M02\_octanol**  
 Assay name: **pH-metric high logP**  
 Assay ID: **18C-03011**  
 Filename: **C:\Sirius\_T3\Mehtap\20180302\_exp29\_logP\_T3-2\18C-03011\_M02\_octanol\_pH-metric high logP.t3r**

Experiment start time: **3/3/2018 1:46:01 PM**  
 Analyst: **Dorothy Levorse**  
 Instrument ID: **T312060**

## Assay Settings

| Setting                             | Value              | Original Value | Date/Time changed | Imported from |
|-------------------------------------|--------------------|----------------|-------------------|---------------|
| <b>General Settings</b>             |                    |                |                   |               |
| Analyst name                        | Dorothy Levorse    |                |                   |               |
| <b>Standard Experiment Settings</b> |                    |                |                   |               |
| Number of titrations                | 3                  |                |                   |               |
| Minimum pH                          | 2.000              |                |                   |               |
| Maximum pH                          | 9.000              |                |                   |               |
| pH step between points of           | 0.200              |                |                   |               |
| Minimum titrant addition            | 0.00002 mL         |                |                   |               |
| Maximum titrant addition            | 0.10000 mL         |                |                   |               |
| Argon flow rate                     | 100%               |                |                   |               |
| Start titration using               | Cautious pH adjust |                |                   |               |
| <b>Advanced General Settings</b>    |                    |                |                   |               |
| Detect turbidity using              | None               |                |                   |               |
| Collect turbidity sensor data       | No                 |                |                   |               |
| Collect UV spectra                  | No                 |                |                   |               |
| Stir after titrant addition for     | 5 seconds          |                |                   |               |
| For titrant addition, stir at       | 10%                |                |                   |               |
| <b>Titration Pre-Dose</b>           |                    |                |                   |               |
| Titration pre-dose                  | None               |                |                   |               |
| <b>Assay Medium</b>                 |                    |                |                   |               |
| ISA water volume                    | 1.50 mL            |                |                   |               |
| Water added                         | Automatic          |                |                   |               |
| Partition solvent type              | Octanol            |                |                   |               |
| Partition volume                    | 0.020 mL           |                |                   |               |
| Partition solvent added             | Automatic          |                |                   |               |
| After partition addition, stir for  | 1 seconds          |                |                   |               |
| <b>Sample Sonication</b>            |                    |                |                   |               |
| Sonicate                            | Yes                |                |                   |               |
| Adjust pH for sonication            | No                 |                |                   |               |
| Sonicate for                        | 120 seconds        |                |                   |               |
| After sonication stir for           | 5 seconds          |                |                   |               |
| <b>Sample Dissolution</b>           |                    |                |                   |               |
| Perform a dissolution stage         | Yes                |                |                   |               |
| Adjust and hold pH for dissolution  | To start pH        |                |                   |               |
| Stir to dissolve for                | 120 seconds        |                |                   |               |
| For dissolution, stir at            | 10%                |                |                   |               |
| <b>Carbonate purge</b>              |                    |                |                   |               |
| Perform a carbonate purge           | No                 |                |                   |               |
| <b>Temperature Control</b>          |                    |                |                   |               |
| Wait for temperature                | Yes                |                |                   |               |
| Required start temperature          | 25.0°C             |                |                   |               |
| Acceptable deviation                | 0.5°C              |                |                   |               |
| Time to wait                        | 60 seconds         |                |                   |               |
| Stir speed of                       | 50%                |                |                   |               |
| <b>Titration 1</b>                  |                    |                |                   |               |
| Titrate from                        | Low to high pH     |                |                   |               |
| Adjust to start pH                  | Yes                |                |                   |               |
| After pH adjust stir for            | 30 seconds         |                |                   |               |
| Stir to allow partitioning for      | 15 seconds         |                |                   |               |
| Stirrer speed for partitioning      | 50%                |                |                   |               |
| <b>Titration 2</b>                  |                    |                |                   |               |
| Titrate from                        | Low to high pH     |                |                   |               |
| Add additional water                | 0.00 mL            |                |                   |               |
| Additional partition solvent volume | 0.030 mL           |                |                   |               |
| Additional partition solvent added  | Automatic          |                |                   |               |
| After pH adjust stir for            | 30 seconds         |                |                   |               |
| Stir to allow partitioning for      | 15 seconds         |                |                   |               |
| Stirrer speed for partitioning      | 55%                |                |                   |               |



Sample name: **M02\_octanol** Experiment start time: **3/3/2018 1:46:01 PM**  
 Assay name: **pH-metric high logP** Analyst: **Dorothy Levorse**  
 Assay ID: **18C-03011** Instrument ID: **T312060**  
 Filename: **C:\Sirius\_T3\Mehtap\20180302\_exp29\_logP\_T3-2\18C-03011\_M02\_octanol\_pH-metric high logP.t3r**

## Assay Settings (continued)

| Setting                             | Value          | Original Value | Date/Time changed | Imported from |
|-------------------------------------|----------------|----------------|-------------------|---------------|
| <b>Titration 3</b>                  |                |                |                   |               |
| Titrate from                        | Low to high pH |                |                   |               |
| Add additional water                | 0.00 mL        |                |                   |               |
| Additional partition solvent volume | 0.250 mL       |                |                   |               |
| Additional partition solvent added  | Automatic      |                |                   |               |
| After pH adjust stir for            | 30 seconds     |                |                   |               |
| Stir to allow partitioning for      | 15 seconds     |                |                   |               |
| Stirrer speed for partitioning      | 60%            |                |                   |               |
| <b>Data Point Stability</b>         |                |                |                   |               |
| Stir during data point collection   | No             |                |                   |               |
| Delay before data point collection  | 0 seconds      |                |                   |               |
| Number of points to average         | 20 points      |                |                   |               |
| Time interval between points        | 0.50 seconds   |                |                   |               |
| Required maximum standard deviation | 0.00100 dpH/dt |                |                   |               |
| Stability timeout after             | 60 seconds     |                |                   |               |

## Calibration Settings

| Setting                   | Value  | Date/Time changed   | Imported from             |
|---------------------------|--------|---------------------|---------------------------|
| Four-Plus alpha           | 0.111  | 3/3/2018 1:46:01 PM | C:\Sirius_T3\HCl18C02.t3r |
| Four-Plus S               | 0.9988 | 3/3/2018 1:46:01 PM | C:\Sirius_T3\HCl18C02.t3r |
| Four-Plus jH              | 1.0    | 3/3/2018 1:46:01 PM | C:\Sirius_T3\HCl18C02.t3r |
| Four-Plus jOH             | -0.8   | 3/3/2018 1:46:01 PM | C:\Sirius_T3\HCl18C02.t3r |
| Base concentration factor | 1.000  | 3/3/2018 1:46:01 PM | C:\Sirius_T3\KOH18B27.t3r |
| Acid concentration factor | 0.999  | 3/3/2018 1:46:01 PM | C:\Sirius_T3\HCl18C02.t3r |

## Instrument Settings

| Setting              | Value                      | Batch Id    | Install date           |
|----------------------|----------------------------|-------------|------------------------|
| Instrument owner     | Merck                      |             |                        |
| Instrument ID        | T312060                    |             |                        |
| Instrument type      | T3 Simulator               |             |                        |
| Software version     | 1.1.3.0                    |             |                        |
| Dispenser module     |                            | T3DM1200361 | 3/31/2009 5:24:52 AM   |
| Dispenser 0          | Water                      |             | 3/31/2009 5:25:05 AM   |
| Syringe volume       | 2.5 mL                     |             |                        |
| Firmware version     | 1.2.1(r2)                  |             |                        |
| Titrant              | Water (0.15 M KCl)         | 02-06-2018  | 2/27/2018 10:05:59 AM  |
| Dispenser 2          | Acid                       |             | 3/31/2009 5:25:11 AM   |
| Syringe volume       | 0.5 mL                     |             |                        |
| Firmware version     | 1.2.1(r2)                  |             |                        |
| Titrant              | Acid (0.5 M HCl)           | 02-27-2018  | 2/27/2018 10:27:22 AM  |
| Dispenser 1          | Base                       |             | 3/31/2009 5:25:21 AM   |
| Syringe volume       | 0.5 mL                     |             |                        |
| Firmware version     | 1.2.1(r2)                  |             |                        |
| Titrant              | Base (0.5 M KOH)           | 9/22/2017   | 2/27/2018 10:21:22 AM  |
| Dispenser 5          | Cosolvent                  |             | 3/31/2009 5:26:24 AM   |
| Syringe volume       | 2.5 mL                     |             |                        |
| Firmware version     | 1.2.1(r2)                  |             |                        |
| Distribution valve 5 | Distribution Valve         |             | 3/31/2009 5:28:19 AM   |
| Firmware version     | 1.1.3                      |             |                        |
| Port A               | Methanol (80%, 0.15 M KCl) | 09-26-17    | 2/7/2018 9:42:01 AM    |
| Port B               | Cyclohexane                | 11-01-17    | 2/27/2018 10:37:57 AM  |
| Dispenser 3          | Buffer                     |             | 8/3/2010 5:05:16 AM    |
| Syringe volume       | 0.5 mL                     |             |                        |
| Firmware version     | 1.2.1(r2)                  |             |                        |
| Titrant              | Dodecane                   | 2018/01/31  | 2/28/2018 10:18:04 AM  |
| Dispenser 6          | Octanol                    |             | 10/22/2010 10:52:43 AM |



Sample name: **M02\_octanol**  
 Assay name: **pH-metric high logP**  
 Assay ID: **18C-03011**  
 Filename: **C:\Sirius\_T3\Mehtap\20180302\_exp29\_logP\_T3-2\18C-03011\_M02\_octanol\_pH-metric high logP.t3r**

Experiment start time: **3/3/2018 1:46:01 PM**  
 Analyst: **Dorothy Levorse**  
 Instrument ID: **T312060**

## Instrument Settings (continued)

| Setting                                   | Value                      | Batch Id    | Install date           |
|-------------------------------------------|----------------------------|-------------|------------------------|
| Syringe volume                            | 0.5 mL                     |             |                        |
| Firmware version                          | 1.2.1(r2)                  |             |                        |
| Titration                                 | Octanol                    | 01-31-2018  | 2/27/2018 9:59:35 AM   |
| Titration                                 |                            | T3TM1200161 | 3/31/2009 5:24:17 AM   |
| Horizontal axis firmware version          | 1.17 AI1DI2DO2 Stepper 2   |             |                        |
| Vertical axis firmware version            | 1.17 AI1DI2DO2 Stepper 2   |             |                        |
| Chassis I/O firmware version              | 1.11 AI1DI0DO4 Norgren I/O |             |                        |
| Probe I/O firmware version                | 1.1.1                      |             |                        |
| Electrode                                 | T3 Electrode               | T3E0923     | 1/23/2018 2:01:00 PM   |
| E0 calibration                            | +6.59 mV                   |             | 3/3/2018 1:46:29 PM    |
| Filling solution                          | 3M KCl                     | KCL097      | 3/2/2018 9:43:24 AM    |
| Liquids                                   |                            |             |                        |
| Wash 1                                    | 50% IPA:50% Water          |             | 3/2/2018 9:45:12 AM    |
| Wash 2                                    | 0.5% Triton X-100 in H2O   |             | 3/2/2018 9:45:15 AM    |
| Buffer position 1                         | pH7 Wash                   |             | 3/2/2018 9:45:18 AM    |
| Buffer position 2                         | pH 7                       |             | 3/2/2018 9:45:21 AM    |
| Storage position                          |                            |             | 3/2/2018 9:44:44 AM    |
| Wash water                                | 6.7e+003 mL                | 02-27-2018  | 2/27/2018 9:54:39 AM   |
| Waste                                     | 8.7e+003 mL                |             | 11/28/2017 10:36:29 AM |
| Temperature controller                    |                            |             | 8/5/2010 6:35:13 AM    |
| Turbidity detector                        |                            |             | 3/31/2009 5:24:45 AM   |
| Spectrometer                              |                            | 074811      | 11/23/2010 11:22:28 AM |
| Dip probe                                 |                            | 10196       |                        |
| Wavelength coefficient A0                 | 183.333                    |             |                        |
| Wavelength coefficient A1                 | 2.21568                    |             |                        |
| Wavelength coefficient A2                 | -0.000289308               |             |                        |
| Total lamp lit time                       | 120:41:49                  |             | 11/23/2010 11:22:28 AM |
| Calibrated on                             | 2/27/2018 10:40:38 AM      |             |                        |
| Integration time                          | 40                         |             |                        |
| Scans averaged                            | 10                         |             |                        |
| Autoloader                                |                            | T3AL1200345 | 11/10/2015 9:34:13 AM  |
| Left-right axis firmware version          | 1.17 AI1DI2DO2 Stepper 2   |             |                        |
| Front-back axis firmware version          | 1.17 AI1DI2DO2 Stepper 2   |             |                        |
| Vertical axis firmware version            | 1.17 AI1DI2DO2 Stepper 2   |             |                        |
| Chassis I/O firmware version              | 1.11 AI1DI0DO4 Norgren I/O |             |                        |
| Configuration                             |                            |             |                        |
| Alternate titration position              | Titration position         |             |                        |
| Alternate reference position              | Reference position         |             |                        |
| Maximum standard vial volume              | 3.50 mL                    |             |                        |
| Maximum alternate vial volume             | 25.00 mL                   |             |                        |
| Automatic action idle period              | 5 minute(s)                |             |                        |
| Titration tube volume                     | 1.3 mL                     |             |                        |
| Syringe flush count                       | 3.50                       |             |                        |
| Flowing wash pump volume                  | 20.0 mL                    |             |                        |
| Flowing wash stir duration                | 5 s                        |             |                        |
| Flowing wash stir speed                   | 30%                        |             |                        |
| Solvent wash stir duration                | 5 s                        |             |                        |
| Solvent wash stir speed                   | 30%                        |             |                        |
| Surfactant wash stir duration             | 5 s                        |             |                        |
| Surfactant wash stir speed                | 30%                        |             |                        |
| E0 calibration minimum number of points   | 10                         |             |                        |
| E0 calibration maximum standard deviation | 0.01500                    |             |                        |
| E0 calibration timeout period             | 60 s                       |             |                        |
| E0 calibration stir duration              | 5 s                        |             |                        |
| E0 calibration preparation stir speed     | 30%                        |             |                        |
| E0 calibration buffer wash stir duration  | 5 s                        |             |                        |
| E0 calibration buffer wash stir speed     | 30%                        |             |                        |
| E0 calibration reading stir speed         | 0%                         |             |                        |

Sample name: **M02\_octanol** Experiment start time: **3/3/2018 1:46:01 PM**  
 Assay name: **pH-metric high logP** Analyst: **Dorothy Levorse**  
 Assay ID: **18C-03011** Instrument ID: **T312060**  
 Filename: **C:\Sirius\_T3\Mehtap\20180302\_exp29\_logP\_T3-2\18C-03011\_M02\_octanol\_pH-metric high logP.t3r**

## Instrument Settings (continued)

| Setting                                     | Value   | Batch Id | Install date |
|---------------------------------------------|---------|----------|--------------|
| Spectrometer calibration stir duration      | 5 s     |          |              |
| Spectrometer calibration stir speed         | 30%     |          |              |
| Spectrometer calibration wash pump volume   | 20.0 mL |          |              |
| Spectrometer calibration wash stir duration | 5 s     |          |              |
| Spectrometer calibration wash stir speed    | 30%     |          |              |
| Overhead dispense height                    | 10000   |          |              |

## Refinement Settings

| Setting                        | Value    | Default value |
|--------------------------------|----------|---------------|
| Turbidity detection method     | None     | None          |
| Turbidity wavelength to assess | 500.0 nm | 500.0 nm      |
| Turbidity maximum absorbance   | 0.100    | 0.100         |
| Turbidity probe threshold      | 50.00    | 50.00         |

## Experiment Log

[2:38] Air gap created for Water (0.15 M KCl)  
 [2:38] Air gap created for Acid (0.5 M HCl)  
 [2:38] Air gap created for Base (0.5 M KOH)  
 [2:39] Air gap released for Water (0.15 M KCl)  
 [2:42] Titrator arm moved over Titration position  
 [2:42] Titration 1 of 3  
 [2:42] Adding initial titrants  
 [2:42] Automatically add 1.50000 mL of water  
 [3:08] Dispensed 1.500000 mL of Water (0.15 M KCl)  
 [3:12] Titrator arm moved over Drain  
 [5:54] Titrator arm moved to Titration position  
 [5:54] Argon flow rate set to 100  
 [5:54] Stirrer speed set to 10  
 [5:59] Automatically add 0.02000 mL of Octanol  
 [5:59] Dispensed 0.019991 mL of Octanol  
 [6:00] Initial pH = 8.70  
 [6:00] Iterative adjust 8.70 -> 2.00  
 [6:00] pH 8.70 -> 2.00  
 [6:02] Air gap released for Acid (0.5 M HCl)  
 [6:03] Dispensed 0.052516 mL of Acid (0.5 M HCl)  
 [6:08] Holding pH 2.00  
 [8:08] Stirrer speed set to 0  
 [8:08] Stirrer speed set to 50  
 [8:08] Iterative adjust 1.98 -> 2.00  
 [8:08] pH 1.98 -> 2.00  
 [8:09] Air gap released for Base (0.5 M KOH)  
 [8:10] Dispensed 0.001623 mL of Base (0.5 M KOH)  
 [9:00] Stirrer speed set to 0  
 [9:15] Datapoint id 1 collected  
 [9:15] Stirrer speed set to 50  
 [9:20] pH 2.08 -> 2.28  
 [9:20] Using cautious pH adjust  
 [9:20] Dispensed 0.006656 mL of Base (0.5 M KOH)  
 [9:25] Stepping pH = 2.17  
 [9:26] Dispensed 0.005456 mL of Base (0.5 M KOH)  
 [9:31] Stepping pH = 2.25  
 [9:31] Dispensed 0.001787 mL of Base (0.5 M KOH)  
 [9:36] Stepping pH = 2.29  
 [9:51] Stirrer speed set to 0  
 [10:02] Datapoint id 2 collected  
 [10:02] Charge balance equation is out by -4.4%  
 [10:02] Stirrer speed set to 50

Sample name: **M02\_octanol**  
 Assay name: **pH-metric high logP**  
 Assay ID: **18C-03011**  
 Filename: **C:\Sirius\_T3\Mehtap\20180302\_exp29\_logP\_T3-2\18C-03011\_M02\_octanol\_pH-metric high logP.t3r**

Experiment start time: **3/3/2018 1:46:01 PM**  
 Analyst: **Dorothy Levorse**  
 Instrument ID: **T312060**

## Experiment Log (continued)

[10:07] pH 2.29 -> 2.49  
 [10:07] Using charge balance adjust  
 [10:07] Dispensed 0.008749 mL of Base (0.5 M KOH)  
 [10:27] Stirrer speed set to 0  
 [10:38] Datapoint id 3 collected  
 [10:38] Charge balance equation is out by -0.3%  
 [10:38] Stirrer speed set to 50  
 [10:43] pH 2.50 -> 2.70  
 [10:43] Using charge balance adjust  
 [10:43] Dispensed 0.006044 mL of Base (0.5 M KOH)  
 [11:03] Stirrer speed set to 0  
 [11:13] Datapoint id 4 collected  
 [11:13] Charge balance equation is out by -8.9%  
 [11:13] Stirrer speed set to 50  
 [11:18] pH 2.68 -> 2.88  
 [11:18] Using charge balance adjust  
 [11:19] Dispensed 0.004563 mL of Base (0.5 M KOH)  
 [11:39] Stirrer speed set to 0  
 [11:49] Datapoint id 5 collected  
 [11:49] Charge balance equation is out by -3.6%  
 [11:49] Stirrer speed set to 50  
 [11:54] pH 2.88 -> 3.08  
 [11:54] Using charge balance adjust  
 [11:54] Dispensed 0.003551 mL of Base (0.5 M KOH)  
 [12:14] Stirrer speed set to 0  
 [12:25] Datapoint id 6 collected  
 [12:25] Charge balance equation is out by 8.3%  
 [12:25] Stirrer speed set to 50  
 [12:30] pH 3.10 -> 3.30  
 [12:30] Using charge balance adjust  
 [12:30] Dispensed 0.002728 mL of Base (0.5 M KOH)  
 [12:50] Stirrer speed set to 0  
 [13:00] Datapoint id 7 collected  
 [13:00] Charge balance equation is out by -4.3%  
 [13:00] Stirrer speed set to 50  
 [13:05] pH 3.29 -> 3.49  
 [13:05] Using charge balance adjust  
 [13:06] Dispensed 0.002117 mL of Base (0.5 M KOH)  
 [13:26] Stirrer speed set to 0  
 [13:49] Datapoint id 8 collected  
 [13:49] Charge balance equation is out by 12.1%  
 [13:49] Stirrer speed set to 50  
 [13:54] pH 3.51 -> 3.71  
 [13:54] Using charge balance adjust  
 [13:54] Dispensed 0.001505 mL of Base (0.5 M KOH)  
 [14:14] Stirrer speed set to 0  
 [14:31] Datapoint id 9 collected  
 [14:31] Charge balance equation is out by 23.9%  
 [14:31] Stirrer speed set to 50  
 [14:36] pH 3.76 -> 3.96  
 [14:36] Using cautious pH adjust  
 [14:36] Dispensed 0.000494 mL of Base (0.5 M KOH)  
 [14:42] Stepping pH = 3.86  
 [14:42] Dispensed 0.000306 mL of Base (0.5 M KOH)  
 [14:47] Stepping pH = 3.94  
 [14:47] Dispensed 0.000047 mL of Base (0.5 M KOH)  
 [14:52] Stepping pH = 3.92  
 [14:52] Dispensed 0.000635 mL of Base (0.5 M KOH)  
 [14:57] Stepping pH = 4.16

Sample name: **M02\_octanol**  
Assay name: **pH-metric high logP**  
Assay ID: **18C-03011**  
Filename: **C:\Sirius\_T3\Mehtap\20180302\_exp29\_logP\_T3-2\18C-03011\_M02\_octanol\_pH-metric high logP.t3r**

Experiment start time: **3/3/2018 1:46:01 PM**  
Analyst: **Dorothy Levorse**  
Instrument ID: **T312060**

## Experiment Log (continued)

[15:12] Stirrer speed set to 0  
[15:32] Datapoint id 10 collected  
[15:32] Charge balance equation is out by -51.7%  
[15:32] Stirrer speed set to 50  
[15:37] pH 4.11 -> 4.31  
[15:37] Using cautious pH adjust  
[15:37] Dispensed 0.000259 mL of Base (0.5 M KOH)  
[15:42] Stepping pH = 4.20  
[15:43] Dispensed 0.000188 mL of Base (0.5 M KOH)  
[15:48] Stepping pH = 4.28  
[15:48] Dispensed 0.000047 mL of Base (0.5 M KOH)  
[15:53] Stepping pH = 4.28  
[15:53] Dispensed 0.000282 mL of Base (0.5 M KOH)  
[15:58] Stepping pH = 4.50  
[16:13] Stirrer speed set to 0  
[16:51] Datapoint id 11 collected  
[16:51] Charge balance equation is out by -54.0%  
[16:51] Stirrer speed set to 50  
[16:56] pH 4.45 -> 4.65  
[16:56] Using cautious pH adjust  
[16:56] Dispensed 0.000118 mL of Base (0.5 M KOH)  
[17:01] Stepping pH = 4.46  
[17:01] Dispensed 0.000353 mL of Base (0.5 M KOH)  
[17:06] Stepping pH = 4.97  
[17:21] Stirrer speed set to 0  
[18:04] Datapoint id 12 collected  
[18:04] Charge balance equation is out by -97.0%  
[18:04] Stirrer speed set to 50  
[18:09] pH 4.93 -> 5.13  
[18:09] Using cautious pH adjust  
[18:09] Dispensed 0.000047 mL of Base (0.5 M KOH)  
[18:15] Stepping pH = 4.94  
[18:15] Dispensed 0.000141 mL of Base (0.5 M KOH)  
[18:20] Stepping pH = 5.22  
[18:35] Stirrer speed set to 0  
[19:26] Datapoint id 13 collected  
[19:26] Charge balance equation is out by -95.2%  
[19:26] Stirrer speed set to 50  
[19:31] pH 5.23 -> 5.43  
[19:31] Using cautious pH adjust  
[19:31] Dispensed 0.000024 mL of Base (0.5 M KOH)  
[19:36] Stepping pH = 5.23  
[19:36] Dispensed 0.000141 mL of Base (0.5 M KOH)  
[19:41] Stepping pH = 5.64  
[19:56] Stirrer speed set to 0  
[20:56] Datapoint id 14 collected  
[20:56] Charge balance equation is out by -204.5%  
[20:56] Stirrer speed set to 50  
[21:02] pH 5.71 -> 5.91  
[21:02] Using cautious pH adjust  
[21:02] Dispensed 0.000024 mL of Base (0.5 M KOH)  
[21:07] Stepping pH = 5.75  
[21:07] Dispensed 0.000047 mL of Base (0.5 M KOH)  
[21:12] Stepping pH = 5.78  
[21:12] Dispensed 0.000071 mL of Base (0.5 M KOH)  
[21:17] Stepping pH = 6.41  
[21:32] Stirrer speed set to 0  
[22:32] Datapoint id 15 collected  
[22:32] Charge balance equation is out by -213.0%

Sample name: **M02\_octanol**  
Assay name: **pH-metric high logP**  
Assay ID: **18C-03011**  
Filename: **C:\Sirius\_T3\Mehtap\20180302\_exp29\_logP\_T3-2\18C-03011\_M02\_octanol\_pH-metric high logP.t3r**

Experiment start time: **3/3/2018 1:46:01 PM**  
Analyst: **Dorothy Levorse**  
Instrument ID: **T312060**

## Experiment Log (continued)

[22:32] Stirrer speed set to 50  
[22:37] pH 6.50 -> 6.70  
[22:37] Using cautious pH adjust  
[22:37] Dispensed 0.000024 mL of Base (0.5 M KOH)  
[22:42] Stepping pH = 6.50  
[22:42] Dispensed 0.000047 mL of Base (0.5 M KOH)  
[22:47] Stepping pH = 6.64  
[22:48] Dispensed 0.000024 mL of Base (0.5 M KOH)  
[22:53] Stepping pH = 6.88  
[23:08] Stirrer speed set to 0  
[24:08] Datapoint id 16 collected  
[24:08] Charge balance equation is out by -164.9%  
[24:08] Stirrer speed set to 50  
[24:13] pH 6.94 -> 7.14  
[24:13] Using cautious pH adjust  
[24:13] Dispensed 0.000024 mL of Base (0.5 M KOH)  
[24:18] Stepping pH = 6.91  
[24:18] Dispensed 0.000047 mL of Base (0.5 M KOH)  
[24:23] Stepping pH = 7.15  
[24:38] Stirrer speed set to 0  
[25:38] Datapoint id 17 collected  
[25:38] Charge balance equation is out by -314.2%  
[25:38] Stirrer speed set to 50  
[25:43] pH 7.53 -> 7.73  
[25:43] Using cautious pH adjust  
[25:43] Dispensed 0.000024 mL of Base (0.5 M KOH)  
[25:49] Stepping pH = 7.51  
[25:49] Dispensed 0.000024 mL of Base (0.5 M KOH)  
[25:54] Stepping pH = 7.55  
[25:54] Dispensed 0.000024 mL of Base (0.5 M KOH)  
[25:59] Stepping pH = 7.84  
[26:14] Stirrer speed set to 0  
[27:14] Datapoint id 18 collected  
[27:14] Charge balance equation is out by -916.6%  
[27:14] Stirrer speed set to 50  
[27:19] pH 8.10 -> 8.30  
[27:19] Using cautious pH adjust  
[27:19] Dispensed 0.000024 mL of Base (0.5 M KOH)  
[27:24] Stepping pH = 8.05  
[27:24] Dispensed 0.000024 mL of Base (0.5 M KOH)  
[27:29] Stepping pH = 8.01  
[27:29] Dispensed 0.000118 mL of Base (0.5 M KOH)  
[27:35] Stepping pH = 8.98  
[27:50] Stirrer speed set to 0  
[28:46] Datapoint id 19 collected  
[28:46] Charge balance equation is out by -2,236.6%  
[28:46] Stirrer speed set to 50  
[28:51] pH 8.92 -> 9.05  
[28:51] Using cautious pH adjust  
[28:51] Dispensed 0.000024 mL of Base (0.5 M KOH)  
[28:56] Stepping pH = 8.92  
[28:56] Dispensed 0.000047 mL of Base (0.5 M KOH)  
[29:01] Stepping pH = 9.11  
[29:16] Stirrer speed set to 0  
[29:53] Datapoint id 20 collected  
[29:53] Charge balance equation is out by -259.1%  
[29:53] Titration 2 of 3  
[29:53] Adding initial titrants  
[29:53] Automatically add 0.03000 mL of Octanol

Sample name: **M02\_octanol**  
Assay name: **pH-metric high logP**  
Assay ID: **18C-03011**  
Filename: **C:\Sirius\_T3\Mehtap\20180302\_exp29\_logP\_T3-2\18C-03011\_M02\_octanol\_pH-metric high logP.t3r**

Experiment start time: **3/3/2018 1:46:01 PM**  
Analyst: **Dorothy Levorse**  
Instrument ID: **T312060**

## Experiment Log (continued)

[29:54] Dispensed 0.030009 mL of Octanol  
[29:54] Stirrer speed set to 10  
[29:55] Stirrer speed set to 55  
[29:55] Iterative adjust 9.14 -> 2.00  
[29:55] pH 9.14 -> 2.00  
[29:57] Dispensed 0.054492 mL of Acid (0.5 M HCl)  
[30:02] pH 2.02 -> 2.00  
[30:02] Dispensed 0.001740 mL of Acid (0.5 M HCl)  
[30:52] Stirrer speed set to 0  
[31:02] Datapoint id 21 collected  
[31:02] Stirrer speed set to 55  
[31:07] pH 2.02 -> 2.22  
[31:07] Using cautious pH adjust  
[31:08] Dispensed 0.008396 mL of Base (0.5 M KOH)  
[31:13] Stepping pH = 2.10  
[31:13] Dispensed 0.007079 mL of Base (0.5 M KOH)  
[31:18] Stepping pH = 2.19  
[31:18] Dispensed 0.001576 mL of Base (0.5 M KOH)  
[31:23] Stepping pH = 2.21  
[31:38] Stirrer speed set to 0  
[31:48] Datapoint id 22 collected  
[31:48] Charge balance equation is out by -1.5%  
[31:48] Stirrer speed set to 55  
[31:54] pH 2.22 -> 2.42  
[31:54] Using charge balance adjust  
[31:54] Dispensed 0.011077 mL of Base (0.5 M KOH)  
[32:14] Stirrer speed set to 0  
[32:25] Datapoint id 23 collected  
[32:25] Charge balance equation is out by -11.5%  
[32:25] Stirrer speed set to 55  
[32:30] pH 2.40 -> 2.60  
[32:30] Using charge balance adjust  
[32:30] Dispensed 0.007879 mL of Base (0.5 M KOH)  
[32:50] Stirrer speed set to 0  
[33:00] Datapoint id 24 collected  
[33:00] Charge balance equation is out by 4.0%  
[33:00] Stirrer speed set to 55  
[33:05] pH 2.61 -> 2.81  
[33:05] Using charge balance adjust  
[33:06] Dispensed 0.005503 mL of Base (0.5 M KOH)  
[33:26] Stirrer speed set to 0  
[33:36] Datapoint id 25 collected  
[33:36] Charge balance equation is out by -14.7%  
[33:36] Stirrer speed set to 55  
[33:41] pH 2.79 -> 2.99  
[33:41] Using charge balance adjust  
[33:41] Dispensed 0.004163 mL of Base (0.5 M KOH)  
[34:01] Stirrer speed set to 0  
[34:11] Datapoint id 26 collected  
[34:11] Charge balance equation is out by -5.7%  
[34:11] Stirrer speed set to 55  
[34:16] pH 2.98 -> 3.18  
[34:16] Using charge balance adjust  
[34:17] Dispensed 0.003081 mL of Base (0.5 M KOH)  
[34:37] Stirrer speed set to 0  
[34:47] Datapoint id 27 collected  
[34:47] Charge balance equation is out by -10.6%  
[34:47] Stirrer speed set to 55  
[34:52] pH 3.16 -> 3.36



Sample name: **M02\_octanol**  
Assay name: **pH-metric high logP**  
Assay ID: **18C-03011**  
Filename: **C:\Sirius\_T3\Mehtap\20180302\_exp29\_logP\_T3-2\18C-03011\_M02\_octanol\_pH-metric high logP.t3r**

Experiment start time: **3/3/2018 1:46:01 PM**  
Analyst: **Dorothy Levorse**  
Instrument ID: **T312060**

## Experiment Log (continued)

[34:52] Using charge balance adjust  
[34:52] Dispensed 0.002281 mL of Base (0.5 M KOH)  
[35:12] Stirrer speed set to 0  
[35:23] Datapoint id 28 collected  
[35:23] Charge balance equation is out by 15.1%  
[35:23] Stirrer speed set to 55  
[35:28] pH 3.40 -> 3.60  
[35:28] Using cautious pH adjust  
[35:28] Dispensed 0.000753 mL of Base (0.5 M KOH)  
[35:33] Stepping pH = 3.52  
[35:33] Dispensed 0.000306 mL of Base (0.5 M KOH)  
[35:38] Stepping pH = 3.58  
[35:38] Dispensed 0.000047 mL of Base (0.5 M KOH)  
[35:43] Stepping pH = 3.59  
[35:43] Dispensed 0.000118 mL of Base (0.5 M KOH)  
[35:49] Stepping pH = 3.61  
[36:04] Stirrer speed set to 0  
[36:14] Datapoint id 29 collected  
[36:14] Charge balance equation is out by 17.7%  
[36:14] Stirrer speed set to 55  
[36:19] pH 3.60 -> 3.80  
[36:19] Using cautious pH adjust  
[36:19] Dispensed 0.000517 mL of Base (0.5 M KOH)  
[36:24] Stepping pH = 3.73  
[36:24] Dispensed 0.000188 mL of Base (0.5 M KOH)  
[36:29] Stepping pH = 3.77  
[36:29] Dispensed 0.000071 mL of Base (0.5 M KOH)  
[36:34] Stepping pH = 3.78  
[36:34] Dispensed 0.000071 mL of Base (0.5 M KOH)  
[36:40] Stepping pH = 3.80  
[36:55] Stirrer speed set to 0  
[37:05] Datapoint id 30 collected  
[37:05] Charge balance equation is out by 16.3%  
[37:05] Stirrer speed set to 55  
[37:10] pH 3.80 -> 4.00  
[37:10] Using cautious pH adjust  
[37:10] Dispensed 0.000329 mL of Base (0.5 M KOH)  
[37:15] Stepping pH = 3.91  
[37:15] Dispensed 0.000188 mL of Base (0.5 M KOH)  
[37:20] Stepping pH = 3.99  
[37:20] Dispensed 0.000024 mL of Base (0.5 M KOH)  
[37:25] Stepping pH = 3.99  
[37:25] Dispensed 0.000071 mL of Base (0.5 M KOH)  
[37:30] Stepping pH = 4.02  
[37:45] Stirrer speed set to 0  
[37:56] Datapoint id 31 collected  
[37:56] Charge balance equation is out by 9.2%  
[37:56] Stirrer speed set to 55  
[38:01] pH 4.02 -> 4.22  
[38:01] Using charge balance adjust  
[38:01] Dispensed 0.000423 mL of Base (0.5 M KOH)  
[38:21] Stirrer speed set to 0  
[38:34] Datapoint id 32 collected  
[38:34] Charge balance equation is out by 10.4%  
[38:34] Stirrer speed set to 55  
[38:39] pH 4.26 -> 4.46  
[38:39] Using charge balance adjust  
[38:39] Dispensed 0.000259 mL of Base (0.5 M KOH)  
[38:59] Stirrer speed set to 0

Sample name: **M02\_octanol**  
 Assay name: **pH-metric high logP**  
 Assay ID: **18C-03011**  
 Filename: **C:\Sirius\_T3\Mehtap\20180302\_exp29\_logP\_T3-2\18C-03011\_M02\_octanol\_pH-metric high logP.t3r**

Experiment start time: **3/3/2018 1:46:01 PM**  
 Analyst: **Dorothy Levorse**  
 Instrument ID: **T312060**

## Experiment Log (continued)

[39:15] Datapoint id 33 collected  
 [39:15] Charge balance equation is out by -4.0%  
 [39:15] Stirrer speed set to 55  
 [39:21] pH 4.47 -> 4.67  
 [39:21] Using charge balance adjust  
 [39:21] Dispensed 0.000165 mL of Base (0.5 M KOH)  
 [39:41] Stirrer speed set to 0  
 [40:11] Datapoint id 34 collected  
 [40:11] Charge balance equation is out by -37.4%  
 [40:11] Stirrer speed set to 55  
 [40:16] pH 4.64 -> 4.84  
 [40:16] Using cautious pH adjust  
 [40:17] Dispensed 0.000047 mL of Base (0.5 M KOH)  
 [40:22] Stepping pH = 4.65  
 [40:22] Dispensed 0.000141 mL of Base (0.5 M KOH)  
 [40:27] Stepping pH = 4.98  
 [40:42] Stirrer speed set to 0  
 [40:58] Datapoint id 35 collected  
 [40:58] Charge balance equation is out by -87.0%  
 [40:58] Stirrer speed set to 55  
 [41:03] pH 5.00 -> 5.20  
 [41:03] Using cautious pH adjust  
 [41:03] Dispensed 0.000024 mL of Base (0.5 M KOH)  
 [41:08] Stepping pH = 5.00  
 [41:08] Dispensed 0.000094 mL of Base (0.5 M KOH)  
 [41:13] Stepping pH = 5.27  
 [41:28] Stirrer speed set to 0  
 [42:01] Datapoint id 36 collected  
 [42:01] Charge balance equation is out by -98.9%  
 [42:01] Stirrer speed set to 55  
 [42:06] pH 5.33 -> 5.53  
 [42:06] Using cautious pH adjust  
 [42:06] Dispensed 0.000024 mL of Base (0.5 M KOH)  
 [42:11] Stepping pH = 5.34  
 [42:11] Dispensed 0.000047 mL of Base (0.5 M KOH)  
 [42:16] Stepping pH = 5.59  
 [42:31] Stirrer speed set to 0  
 [43:19] Datapoint id 37 collected  
 [43:19] Charge balance equation is out by -92.9%  
 [43:19] Stirrer speed set to 55  
 [43:24] pH 5.70 -> 5.90  
 [43:24] Using cautious pH adjust  
 [43:24] Dispensed 0.000024 mL of Base (0.5 M KOH)  
 [43:29] Stepping pH = 5.72  
 [43:29] Dispensed 0.000047 mL of Base (0.5 M KOH)  
 [43:34] Stepping pH = 6.12  
 [43:49] Stirrer speed set to 0  
 [44:49] Datapoint id 38 collected  
 [44:49] Charge balance equation is out by -87.7%  
 [44:49] Stirrer speed set to 55  
 [44:54] pH 6.16 -> 6.36  
 [44:54] Using cautious pH adjust  
 [44:54] Dispensed 0.000024 mL of Base (0.5 M KOH)  
 [44:59] Stepping pH = 6.16  
 [44:59] Dispensed 0.000071 mL of Base (0.5 M KOH)  
 [45:04] Stepping pH = 6.69  
 [45:20] Stirrer speed set to 0  
 [46:20] Datapoint id 39 collected  
 [46:20] Charge balance equation is out by -96.1%



Sample name: **M02\_octanol**  
Assay name: **pH-metric high logP**  
Assay ID: **18C-03011**  
Filename: **C:\Sirius\_T3\Mehtap\20180302\_exp29\_logP\_T3-2\18C-03011\_M02\_octanol\_pH-metric high logP.t3r**

Experiment start time: **3/3/2018 1:46:01 PM**  
Analyst: **Dorothy Levorse**  
Instrument ID: **T312060**

## Experiment Log (continued)

[46:20] Stirrer speed set to 55  
[46:25] pH 6.83 -> 7.03  
[46:25] Using cautious pH adjust  
[46:25] Dispensed 0.000024 mL of Base (0.5 M KOH)  
[46:30] Stepping pH = 6.85  
[46:30] Dispensed 0.000024 mL of Base (0.5 M KOH)  
[46:35] Stepping pH = 6.96  
[46:35] Dispensed 0.000024 mL of Base (0.5 M KOH)  
[46:40] Stepping pH = 7.20  
[46:55] Stirrer speed set to 0  
[47:55] Datapoint id 40 collected  
[47:55] Charge balance equation is out by -198.9%  
[47:55] Stirrer speed set to 55  
[48:00] pH 7.31 -> 7.51  
[48:00] Using cautious pH adjust  
[48:00] Dispensed 0.000024 mL of Base (0.5 M KOH)  
[48:05] Stepping pH = 7.34  
[48:06] Dispensed 0.000024 mL of Base (0.5 M KOH)  
[48:11] Stepping pH = 7.46  
[48:11] Dispensed 0.000024 mL of Base (0.5 M KOH)  
[48:16] Stepping pH = 7.68  
[48:31] Stirrer speed set to 0  
[49:31] Datapoint id 41 collected  
[49:31] Charge balance equation is out by -452.4%  
[49:31] Stirrer speed set to 55  
[49:36] pH 7.54 -> 7.74  
[49:36] Using cautious pH adjust  
[49:36] Dispensed 0.000024 mL of Base (0.5 M KOH)  
[49:41] Stepping pH = 7.55  
[49:41] Dispensed 0.000024 mL of Base (0.5 M KOH)  
[49:46] Stepping pH = 7.73  
[50:02] Stirrer speed set to 0  
[51:02] Datapoint id 42 collected  
[51:02] Charge balance equation is out by -414.6%  
[51:02] Stirrer speed set to 55  
[51:07] pH 7.69 -> 7.89  
[51:07] Using cautious pH adjust  
[51:07] Dispensed 0.000024 mL of Base (0.5 M KOH)  
[51:12] Stepping pH = 7.66  
[51:12] Dispensed 0.000024 mL of Base (0.5 M KOH)  
[51:17] Stepping pH = 7.90  
[51:32] Stirrer speed set to 0  
[52:32] Datapoint id 43 collected  
[52:32] Charge balance equation is out by -498.4%  
[52:32] Stirrer speed set to 55  
[52:37] pH 8.03 -> 8.23  
[52:37] Using cautious pH adjust  
[52:37] Dispensed 0.000024 mL of Base (0.5 M KOH)  
[52:42] Stepping pH = 8.05  
[52:42] Dispensed 0.000024 mL of Base (0.5 M KOH)  
[52:47] Stepping pH = 8.24  
[53:02] Stirrer speed set to 0  
[54:03] Datapoint id 44 collected  
[54:03] Charge balance equation is out by -454.8%  
[54:03] Stirrer speed set to 55  
[54:08] pH 8.27 -> 8.47  
[54:08] Using cautious pH adjust  
[54:08] Dispensed 0.000024 mL of Base (0.5 M KOH)  
[54:13] Stepping pH = 8.30

Sample name: **M02\_octanol**  
Assay name: **pH-metric high logP**  
Assay ID: **18C-03011**  
Filename: **C:\Sirius\_T3\Mehtap\20180302\_exp29\_logP\_T3-2\18C-03011\_M02\_octanol\_pH-metric high logP.t3r**

Experiment start time: **3/3/2018 1:46:01 PM**  
Analyst: **Dorothy Levorse**  
Instrument ID: **T312060**

## Experiment Log (continued)

[54:13] Dispensed 0.000024 mL of Base (0.5 M KOH)  
[54:18] Stepping pH = 8.46  
[54:33] Stirrer speed set to 0  
[55:33] Datapoint id 45 collected  
[55:33] Charge balance equation is out by -298.4%  
[55:33] Stirrer speed set to 55  
[55:38] pH 8.50 -> 8.70  
[55:38] Using cautious pH adjust  
[55:38] Dispensed 0.000024 mL of Base (0.5 M KOH)  
[55:43] Stepping pH = 8.53  
[55:43] Dispensed 0.000024 mL of Base (0.5 M KOH)  
[55:48] Stepping pH = 8.65  
[55:48] Dispensed 0.000024 mL of Base (0.5 M KOH)  
[55:54] Stepping pH = 8.76  
[56:09] Stirrer speed set to 0  
[56:39] Datapoint id 46 collected  
[56:39] Charge balance equation is out by -284.7%  
[56:39] Stirrer speed set to 55  
[56:44] pH 8.74 -> 8.94  
[56:44] Using cautious pH adjust  
[56:44] Dispensed 0.000024 mL of Base (0.5 M KOH)  
[56:49] Stepping pH = 8.74  
[56:50] Dispensed 0.000047 mL of Base (0.5 M KOH)  
[56:55] Stepping pH = 8.90  
[56:55] Dispensed 0.000024 mL of Base (0.5 M KOH)  
[57:00] Stepping pH = 8.96  
[57:15] Stirrer speed set to 0  
[57:51] Datapoint id 47 collected  
[57:51] Charge balance equation is out by -204.3%  
[57:51] Stirrer speed set to 55  
[57:56] pH 8.98 -> 9.05  
[57:56] Using cautious pH adjust  
[57:56] Dispensed 0.000024 mL of Base (0.5 M KOH)  
[58:01] Stepping pH = 8.98  
[58:01] Dispensed 0.000024 mL of Base (0.5 M KOH)  
[58:06] Stepping pH = 9.02  
[58:21] Stirrer speed set to 0  
[58:48] Datapoint id 48 collected  
[58:48] Charge balance equation is out by -216.1%  
[58:48] Titration 3 of 3  
[58:48] Adding initial titrants  
[58:48] Automatically add 0.25000 mL of Octanol  
[58:53] Dispensed 0.250000 mL of Octanol  
[58:53] Stirrer speed set to 10  
[58:55] Stirrer speed set to 60  
[58:55] Iterative adjust 9.03 -> 2.00  
[58:55] pH 9.03 -> 2.00  
[58:56] Dispensed 0.056044 mL of Acid (0.5 M HCl)  
[59:01] pH 2.04 -> 2.00  
[59:01] Dispensed 0.004139 mL of Acid (0.5 M HCl)  
[59:52] Stirrer speed set to 0  
[1:00:02] Datapoint id 49 collected  
[1:00:02] Stirrer speed set to 60  
[1:00:07] pH 1.99 -> 2.19  
[1:00:07] Using cautious pH adjust  
[1:00:07] Dispensed 0.009666 mL of Base (0.5 M KOH)  
[1:00:12] Stepping pH = 2.07  
[1:00:12] Dispensed 0.009055 mL of Base (0.5 M KOH)  
[1:00:17] Stepping pH = 2.16

Sample name: **M02\_octanol**  
Assay name: **pH-metric high logP**  
Assay ID: **18C-03011**  
Filename: **C:\Sirius\_T3\Mehtap\20180302\_exp29\_logP\_T3-2\18C-03011\_M02\_octanol\_pH-metric high logP.t3r**

Experiment start time: **3/3/2018 1:46:01 PM**  
Analyst: **Dorothy Levorse**  
Instrument ID: **T312060**

## Experiment Log (continued)

[1:00:18] Dispensed 0.002258 mL of Base (0.5 M KOH)  
[1:00:23] Stepping pH = 2.19  
[1:00:38] Stirrer speed set to 0  
[1:00:48] Datapoint id 50 collected  
[1:00:48] Charge balance equation is out by -8.6%  
[1:00:48] Stirrer speed set to 60  
[1:00:53] pH 2.19 -> 2.39  
[1:00:53] Using charge balance adjust  
[1:00:53] Dispensed 0.012912 mL of Base (0.5 M KOH)  
[1:01:14] Stirrer speed set to 0  
[1:01:24] Datapoint id 51 collected  
[1:01:24] Charge balance equation is out by -8.4%  
[1:01:24] Stirrer speed set to 60  
[1:01:29] pH 2.37 -> 2.57  
[1:01:29] Using charge balance adjust  
[1:01:29] Dispensed 0.008984 mL of Base (0.5 M KOH)  
[1:01:49] Stirrer speed set to 0  
[1:01:59] Datapoint id 52 collected  
[1:01:59] Charge balance equation is out by 2.2%  
[1:01:59] Stirrer speed set to 60  
[1:02:04] pH 2.58 -> 2.78  
[1:02:04] Using charge balance adjust  
[1:02:05] Dispensed 0.006044 mL of Base (0.5 M KOH)  
[1:02:25] Stirrer speed set to 0  
[1:02:35] Datapoint id 53 collected  
[1:02:35] Charge balance equation is out by -7.6%  
[1:02:35] Stirrer speed set to 60  
[1:02:40] pH 2.77 -> 2.97  
[1:02:40] Using charge balance adjust  
[1:02:40] Dispensed 0.004233 mL of Base (0.5 M KOH)  
[1:03:00] Stirrer speed set to 0  
[1:03:15] Datapoint id 54 collected  
[1:03:15] Charge balance equation is out by 7.6%  
[1:03:15] Stirrer speed set to 60  
[1:03:20] pH 2.99 -> 3.19  
[1:03:20] Using charge balance adjust  
[1:03:20] Dispensed 0.002752 mL of Base (0.5 M KOH)  
[1:03:40] Stirrer speed set to 0  
[1:03:50] Datapoint id 55 collected  
[1:03:50] Charge balance equation is out by 19.2%  
[1:03:50] Stirrer speed set to 60  
[1:03:55] pH 3.23 -> 3.43  
[1:03:55] Using cautious pH adjust  
[1:03:55] Dispensed 0.000847 mL of Base (0.5 M KOH)  
[1:04:01] Stepping pH = 3.33  
[1:04:01] Dispensed 0.000541 mL of Base (0.5 M KOH)  
[1:04:06] Stepping pH = 3.41  
[1:04:06] Dispensed 0.000118 mL of Base (0.5 M KOH)  
[1:04:11] Stepping pH = 3.42  
[1:04:11] Dispensed 0.000165 mL of Base (0.5 M KOH)  
[1:04:16] Stepping pH = 3.43  
[1:04:31] Stirrer speed set to 0  
[1:04:41] Datapoint id 56 collected  
[1:04:41] Charge balance equation is out by 1.6%  
[1:04:41] Stirrer speed set to 60  
[1:04:46] pH 3.44 -> 3.64  
[1:04:46] Using charge balance adjust  
[1:04:46] Dispensed 0.001105 mL of Base (0.5 M KOH)  
[1:05:07] Stirrer speed set to 0

Sample name: **M02\_octanol**  
Assay name: **pH-metric high logP**  
Assay ID: **18C-03011**  
Filename: **C:\Sirius\_T3\Mehtap\20180302\_exp29\_logP\_T3-2\18C-03011\_M02\_octanol\_pH-metric high logP.t3r**

Experiment start time: **3/3/2018 1:46:01 PM**  
Analyst: **Dorothy Levorse**  
Instrument ID: **T312060**

## Experiment Log (continued)

[1:05:22] Datapoint id 57 collected  
[1:05:22] Charge balance equation is out by 27.7%  
[1:05:22] Stirrer speed set to 60  
[1:05:27] pH 3.69 -> 3.89  
[1:05:27] Using cautious pH adjust  
[1:05:27] Dispensed 0.000306 mL of Base (0.5 M KOH)  
[1:05:32] Stepping pH = 3.76  
[1:05:32] Dispensed 0.000306 mL of Base (0.5 M KOH)  
[1:05:37] Stepping pH = 3.92  
[1:05:52] Stirrer speed set to 0  
[1:06:03] Datapoint id 58 collected  
[1:06:03] Charge balance equation is out by -0.4%  
[1:06:03] Stirrer speed set to 60  
[1:06:08] pH 3.93 -> 4.13  
[1:06:08] Using charge balance adjust  
[1:06:08] Dispensed 0.000376 mL of Base (0.5 M KOH)  
[1:06:28] Stirrer speed set to 0  
[1:06:39] Datapoint id 59 collected  
[1:06:39] Charge balance equation is out by 41.3%  
[1:06:39] Stirrer speed set to 60  
[1:06:44] pH 4.23 -> 4.43  
[1:06:44] Using cautious pH adjust  
[1:06:44] Dispensed 0.000094 mL of Base (0.5 M KOH)  
[1:06:49] Stepping pH = 4.24  
[1:06:49] Dispensed 0.000259 mL of Base (0.5 M KOH)  
[1:06:54] Stepping pH = 4.79  
[1:07:09] Stirrer speed set to 0  
[1:07:54] Datapoint id 60 collected  
[1:07:54] Charge balance equation is out by -83.8%  
[1:07:54] Stirrer speed set to 60  
[1:08:00] pH 4.78 -> 4.98  
[1:08:00] Using cautious pH adjust  
[1:08:00] Dispensed 0.000024 mL of Base (0.5 M KOH)  
[1:08:05] Stepping pH = 4.77  
[1:08:05] Dispensed 0.000141 mL of Base (0.5 M KOH)  
[1:08:10] Stepping pH = 5.22  
[1:08:25] Stirrer speed set to 0  
[1:08:41] Datapoint id 61 collected  
[1:08:41] Charge balance equation is out by -208.6%  
[1:08:41] Stirrer speed set to 60  
[1:08:46] pH 5.30 -> 5.50  
[1:08:46] Using cautious pH adjust  
[1:08:46] Dispensed 0.000024 mL of Base (0.5 M KOH)  
[1:08:51] Stepping pH = 5.31  
[1:08:51] Dispensed 0.000047 mL of Base (0.5 M KOH)  
[1:08:56] Stepping pH = 5.45  
[1:08:56] Dispensed 0.000024 mL of Base (0.5 M KOH)  
[1:09:01] Stepping pH = 5.56  
[1:09:16] Stirrer speed set to 0  
[1:10:05] Datapoint id 62 collected  
[1:10:05] Charge balance equation is out by -166.1%  
[1:10:05] Stirrer speed set to 60  
[1:10:10] pH 5.72 -> 5.92  
[1:10:10] Using cautious pH adjust  
[1:10:10] Dispensed 0.000024 mL of Base (0.5 M KOH)  
[1:10:15] Stepping pH = 5.75  
[1:10:15] Dispensed 0.000047 mL of Base (0.5 M KOH)  
[1:10:20] Stepping pH = 6.09  
[1:10:35] Stirrer speed set to 0

Sample name: **M02\_octanol**  
Assay name: **pH-metric high logP**  
Assay ID: **18C-03011**  
Filename: **C:\Sirius\_T3\Mehtap\20180302\_exp29\_logP\_T3-2\18C-03011\_M02\_octanol\_pH-metric high logP.t3r**

Experiment start time: **3/3/2018 1:46:01 PM**  
Analyst: **Dorothy Levorse**  
Instrument ID: **T312060**

## Experiment Log (continued)

[1:11:35] Datapoint id 63 collected  
[1:11:35] Charge balance equation is out by -74.3%  
[1:11:35] Stirrer speed set to 60  
[1:11:41] pH 6.22 -> 6.42  
[1:11:41] Using cautious pH adjust  
[1:11:41] Dispensed 0.000024 mL of Base (0.5 M KOH)  
[1:11:46] Stepping pH = 6.24  
[1:11:46] Dispensed 0.000047 mL of Base (0.5 M KOH)  
[1:11:51] Stepping pH = 6.31  
[1:11:51] Dispensed 0.000047 mL of Base (0.5 M KOH)  
[1:11:56] Stepping pH = 6.87  
[1:12:11] Stirrer speed set to 0  
[1:13:11] Datapoint id 64 collected  
[1:13:11] Charge balance equation is out by -176.8%  
[1:13:11] Stirrer speed set to 60  
[1:13:16] pH 7.12 -> 7.32  
[1:13:16] Using cautious pH adjust  
[1:13:16] Dispensed 0.000024 mL of Base (0.5 M KOH)  
[1:13:21] Stepping pH = 7.20  
[1:13:21] Dispensed 0.000024 mL of Base (0.5 M KOH)  
[1:13:27] Stepping pH = 7.33  
[1:13:42] Stirrer speed set to 0  
[1:14:42] Datapoint id 65 collected  
[1:14:42] Charge balance equation is out by -102.3%  
[1:14:42] Stirrer speed set to 60  
[1:14:47] pH 7.16 -> 7.36  
[1:14:47] Using cautious pH adjust  
[1:14:47] Dispensed 0.000024 mL of Base (0.5 M KOH)  
[1:14:52] Stepping pH = 7.24  
[1:14:52] Dispensed 0.000024 mL of Base (0.5 M KOH)  
[1:14:57] Stepping pH = 7.41  
[1:15:12] Stirrer speed set to 0  
[1:16:12] Datapoint id 66 collected  
[1:16:12] Charge balance equation is out by -115.3%  
[1:16:12] Stirrer speed set to 60  
[1:16:17] pH 7.58 -> 7.78  
[1:16:17] Using cautious pH adjust  
[1:16:17] Dispensed 0.000024 mL of Base (0.5 M KOH)  
[1:16:22] Stepping pH = 7.73  
[1:16:22] Dispensed 0.000024 mL of Base (0.5 M KOH)  
[1:16:28] Stepping pH = 7.93  
[1:16:43] Stirrer speed set to 0  
[1:17:43] Datapoint id 67 collected  
[1:17:43] Charge balance equation is out by -302.3%  
[1:17:43] Stirrer speed set to 60  
[1:17:48] pH 7.75 -> 7.95  
[1:17:48] Using cautious pH adjust  
[1:17:48] Dispensed 0.000024 mL of Base (0.5 M KOH)  
[1:17:53] Stepping pH = 7.87  
[1:17:53] Dispensed 0.000024 mL of Base (0.5 M KOH)  
[1:17:58] Stepping pH = 8.15  
[1:18:13] Stirrer speed set to 0  
[1:19:13] Datapoint id 68 collected  
[1:19:13] Charge balance equation is out by -373.8%  
[1:19:13] Stirrer speed set to 60  
[1:19:18] pH 8.24 -> 8.44  
[1:19:18] Using cautious pH adjust  
[1:19:18] Dispensed 0.000024 mL of Base (0.5 M KOH)  
[1:19:23] Stepping pH = 8.26

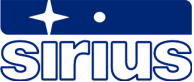

Sample name: **M02\_octanol**  
Assay name: **pH-metric high logP**  
Assay ID: **18C-03011**  
Filename: **C:\Sirius\_T3\Mehtap\20180302\_exp29\_logP\_T3-2\18C-03011\_M02\_octanol\_pH-metric high logP.t3r**

Experiment start time: **3/3/2018 1:46:01 PM**  
Analyst: **Dorothy Levorse**  
Instrument ID: **T312060**

### Experiment Log (continued)

[1:19:23] Dispensed 0.000024 mL of Base (0.5 M KOH)  
[1:19:28] Stepping pH = 8.42  
[1:19:29] Dispensed 0.000024 mL of Base (0.5 M KOH)  
[1:19:34] Stepping pH = 8.58  
[1:19:49] Stirrer speed set to 0  
[1:20:49] Datapoint id 69 collected  
[1:20:49] Charge balance equation is out by -452.3%  
[1:20:49] Stirrer speed set to 60  
[1:20:54] pH 8.61 -> 8.81  
[1:20:54] Using cautious pH adjust  
[1:20:54] Dispensed 0.000024 mL of Base (0.5 M KOH)  
[1:20:59] Stepping pH = 8.61  
[1:20:59] Dispensed 0.000024 mL of Base (0.5 M KOH)  
[1:21:04] Stepping pH = 8.60  
[1:21:04] Dispensed 0.000165 mL of Base (0.5 M KOH)  
[1:21:09] Stepping pH = 9.23  
[1:21:24] Stirrer speed set to 0  
[1:21:39] Datapoint id 70 collected  
[1:21:39] Charge balance equation is out by -904.7%  
[1:21:39] Argon flow rate set to 0  
[1:21:43] Titrator arm moved over Titration position
