# Supplementary material for: Octanol-water partition coefficient measurements for the SAMPL6 Blind Prediction Challenge
Source: bioRxiv or medRxiv preprint supplement (doi:10.1101/757393), 2019-12-02
Supplement: Supplementary file [file media-2.zip]

Sample name: **M16\_octanol**  
 Assay name: **pH-metric high logP**  
 Assay ID: **18C-01007**  
 Filename: **C:\Sirius\_T3\Mehtap\20180228\_exp28\_logP\_T3-2\18C-01007\_M16\_octanol\_pH-metric high logP.t3r**

Experiment start time: **3/1/2018 9:25:34 AM**  
 Analyst: **Pion**  
 Instrument ID: **T312060**

## pH-metric Result

logP (XH2 +) 1.38 ±1.07 (n=50)  
 logP (neutral XH) 3.14 ±0.01 (n=50)  
 logP (X -) -1.62

### 18C-01007 Points 1 to 30

M16\_octanol concentration factor 0.780  
 Carbonate 0.1052 mM  
 Acidity error 3.38405 mM

### 18C-01007 Points 31 to 58

M16\_octanol concentration factor 0.751  
 Carbonate 0.8332 mM  
 Acidity error 2.20126 mM

### 18C-01007 Points 59 to 86

M16\_octanol concentration factor 0.772  
 Carbonate 0.5481 mM  
 Acidity error 2.29676 mM

## Warnings and errors

Errors None  
 Warnings Excessive carbonate concentration present

## Sample logD and percent species

| pH     | M16_octanol<br>logD | M16_octanol<br>M16_octanolH2 | M16_octanol<br>M16_octanolH | M16_octanol<br>M16_octanol | M16_octanol<br>M16_octanolH2* | M16_octanol<br>M16_octanolH* | M16_octanol<br>M16_octanol* | Comment       |
|--------|---------------------|------------------------------|-----------------------------|----------------------------|-------------------------------|------------------------------|-----------------------------|---------------|
| 1.000  | 1.39                | 3.94 %                       | 0.00 %                      | 0.00 %                     | 94.96 %                       | 1.10 %                       | 0.00 %                      | Stomach<br>pH |
| 1.200  | 1.39                | 3.92 %                       | 0.00 %                      | 0.00 %                     | 94.35 %                       | 1.73 %                       | 0.00 %                      |               |
| 2.000  | 1.43                | 3.59 %                       | 0.01 %                      | 0.00 %                     | 86.42 %                       | 9.99 %                       | 0.00 %                      |               |
| 3.000  | 1.71                | 1.89 %                       | 0.04 %                      | 0.00 %                     | 45.50 %                       | 52.58 %                      | 0.00 %                      | Blood pH      |
| 4.000  | 2.40                | 0.33 %                       | 0.07 %                      | 0.00 %                     | 7.93 %                        | 91.67 %                      | 0.00 %                      |               |
| 5.000  | 2.97                | 0.04 %                       | 0.07 %                      | 0.00 %                     | 0.86 %                        | 99.04 %                      | 0.00 %                      |               |
| 6.000  | 3.12                | 0.00 %                       | 0.07 %                      | 0.00 %                     | 0.09 %                        | 99.84 %                      | 0.00 %                      |               |
| 6.500  | 3.14                | 0.00 %                       | 0.07 %                      | 0.00 %                     | 0.03 %                        | 99.90 %                      | 0.00 %                      |               |
| 7.000  | 3.14                | 0.00 %                       | 0.07 %                      | 0.00 %                     | 0.01 %                        | 99.92 %                      | 0.00 %                      |               |
| 7.400  | 3.13                | 0.00 %                       | 0.07 %                      | 0.00 %                     | 0.00 %                        | 99.92 %                      | 0.00 %                      |               |
| 8.000  | 3.10                | 0.00 %                       | 0.07 %                      | 0.01 %                     | 0.00 %                        | 99.92 %                      | 0.00 %                      |               |
| 9.000  | 2.81                | 0.00 %                       | 0.07 %                      | 0.08 %                     | 0.00 %                        | 99.84 %                      | 0.00 %                      |               |
| 10.000 | 2.05                | 0.00 %                       | 0.07 %                      | 0.82 %                     | 0.00 %                        | 99.09 %                      | 0.02 %                      |               |
| 11.000 | 1.08                | 0.00 %                       | 0.07 %                      | 7.59 %                     | 0.00 %                        | 92.16 %                      | 0.18 %                      |               |
| 12.000 | 0.09                | 0.00 %                       | 0.04 %                      | 44.66 %                    | 0.00 %                        | 54.23 %                      | 1.07 %                      |               |

Sample name: **M16\_octanol**  
 Assay name: **pH-metric high logP**  
 Assay ID: **18C-01007**  
 Filename: **C:\Sirius\_T3\Mehtap\20180228\_exp28\_logP\_T3-2\18C-01007\_M16\_octanol\_pH-metric high logP.t3r**

Experiment start time: **3/1/2018 9:25:34 AM**  
 Analyst: **Pion**  
 Instrument ID: **T312060**

## Graphs

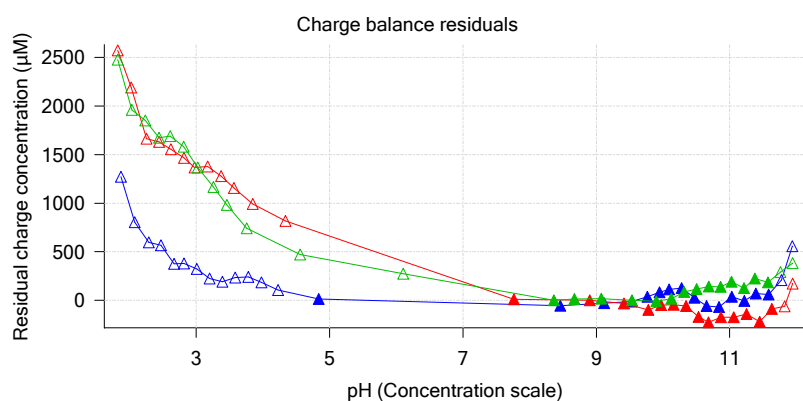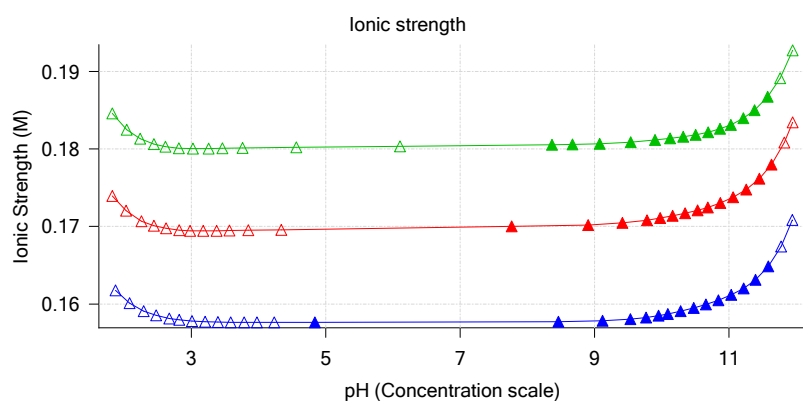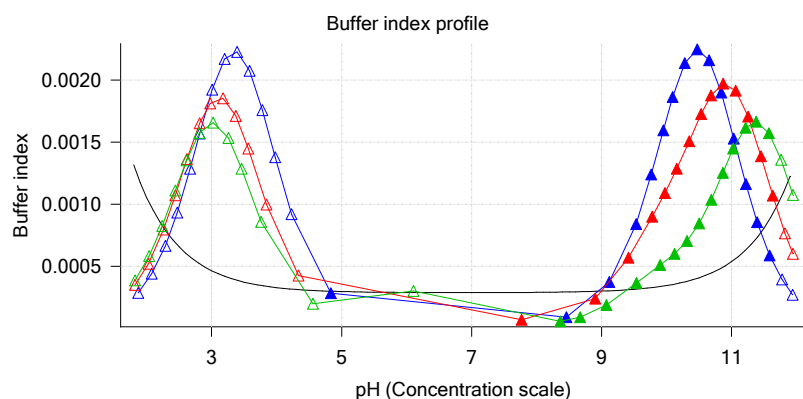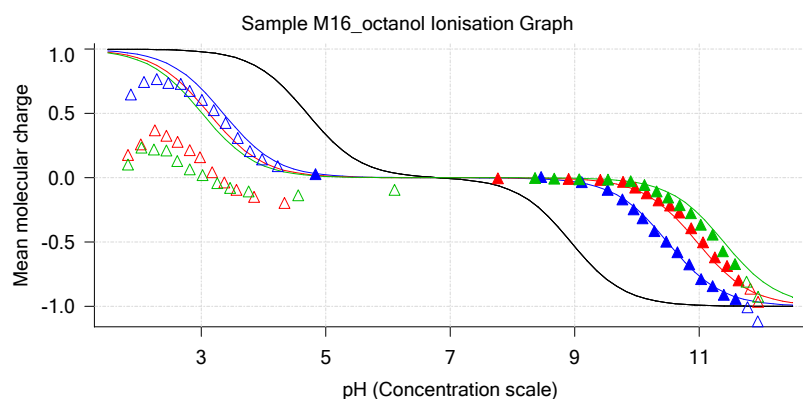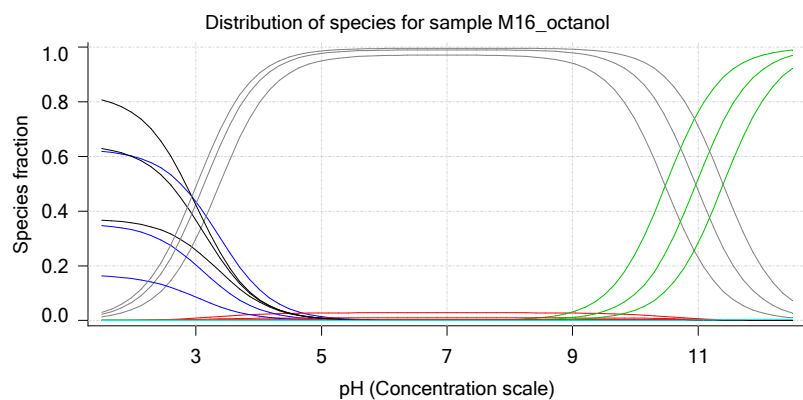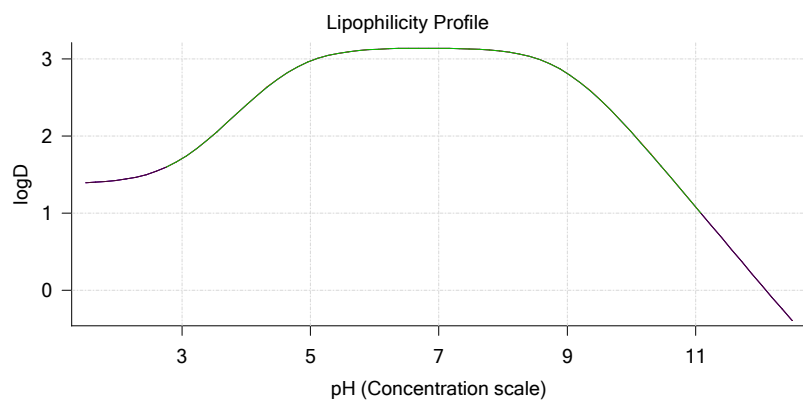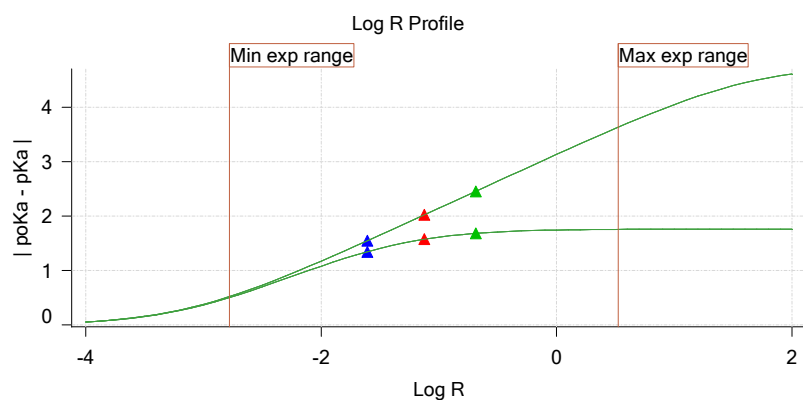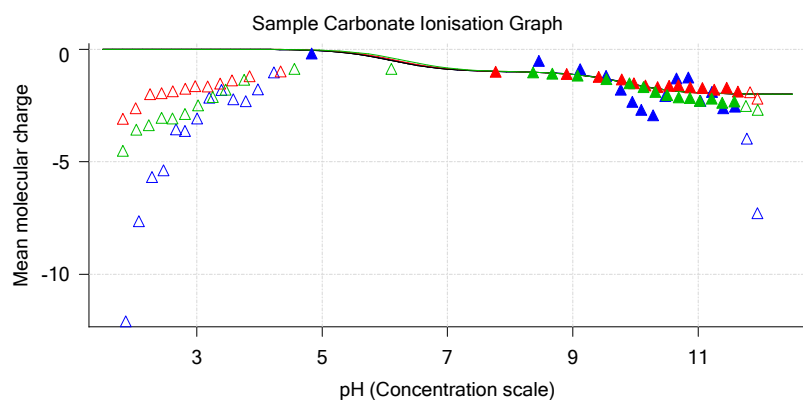

Sample name: **M16\_octanol**  
 Assay name: **pH-metric high logP**  
 Assay ID: **18C-01007**  
 Filename: **C:\Sirius\_T3\Mehtap\20180228\_exp28\_logP\_T3-2\18C-01007\_M16\_octanol\_pH-metric high logP.t3r**

Experiment start time: **3/1/2018 9:25:34 AM**  
 Analyst: **Pion**  
 Instrument ID: **T312060**

## Graphs (continued)

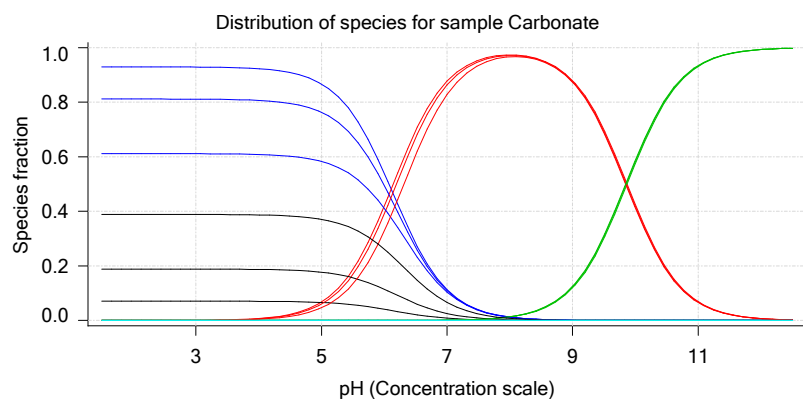

Sample name: **M16\_octanol**  
 Assay name: **pH-metric high logP**  
 Assay ID: **18C-01007**  
 Filename: **C:\Sirius\_T3\Mehtap\20180228\_exp28\_logP\_T3-2\18C-01007\_M16\_octanol\_pH-metric high logP.t3r**

Experiment start time: **3/1/2018 9:25:34 AM**  
 Analyst: **Pion**  
 Instrument ID: **T312060**

## pH-metric high logP Titration 1 of 3 18C-01007 Points 1 to 30

### Overall results

RMSD 0.139  
 Average ionic strength 0.160 M  
 Average temperature 25.0°C  
 Partition ratio 0.0246 : 1  
 Analyte concentration range 4642.2 µM to 4978.9 µM  
 Total points considered 15 of 30

### Warnings and errors

Errors None  
 Warnings Excessive acidity error present

### Four-Plus parameters

Alpha 0.130 3/1/2018 9:25:33 AM C:\Sirius\_T3\HCl18B27.t3r  
 S 0.9970 3/1/2018 9:25:33 AM C:\Sirius\_T3\HCl18B27.t3r  
 jH 0.8 3/1/2018 9:25:33 AM C:\Sirius\_T3\HCl18B27.t3r  
 jOH -0.4 3/1/2018 9:25:33 AM C:\Sirius\_T3\HCl18B27.t3r

### Titrants

0.50 M HCl 0.993513 3/1/2018 9:25:34 AM C:\Sirius\_T3\HCl18B27.t3r  
 0.50 M KOH 0.999845 3/1/2018 9:25:34 AM C:\Sirius\_T3\KOH18B27.t3r

### Sample

M16\_octanol concentration factor 0.780  
 Base pKa 1 4.70  
 Acid pKa 2 8.94  
 logP (XH<sub>2</sub><sup>+</sup>) 1.38  
 logP (neutral XH) 3.12  
 logP (X<sup>-</sup>) -1.62

### Sample graphs

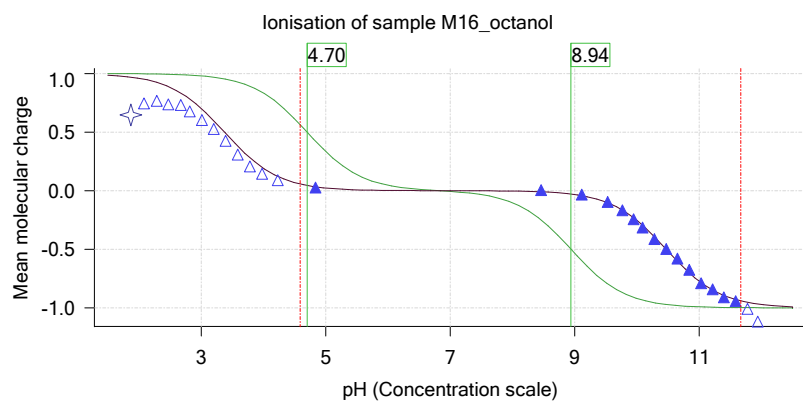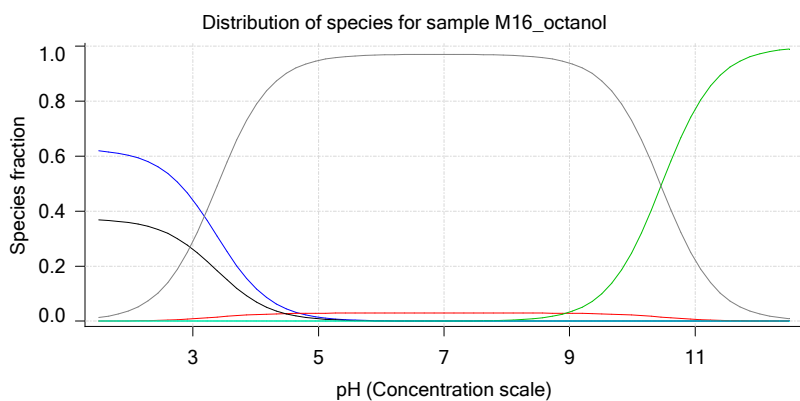

Sample name: **M16\_octanol**  
 Assay name: **pH-metric high logP**  
 Assay ID: **18C-01007**  
 Filename: **C:\Sirius\_T3\Mehtap\20180228\_exp28\_logP\_T3-2\18C-01007\_M16\_octanol\_pH-metric high logP.t3r**

Experiment start time: **3/1/2018 9:25:34 AM**  
 Analyst: **Pion**  
 Instrument ID: **T312060**

## Sample graphs (continued)

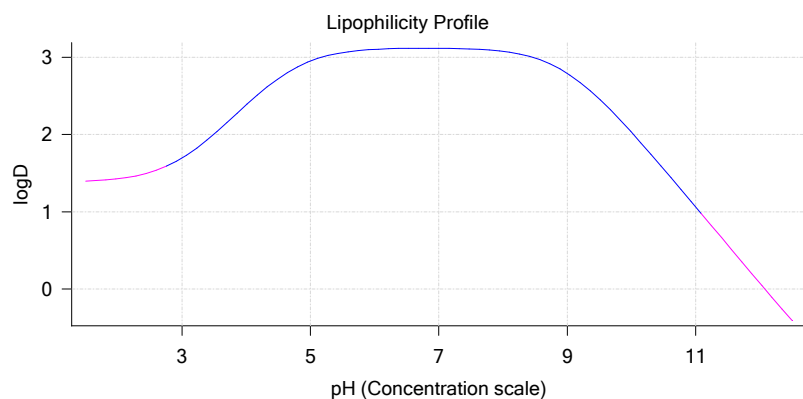

## Sample logD and percent species

| pH     | M16_octanol<br>logD | M16_octanol<br>M16_octanolH2 | M16_octanol<br>M16_octanolH | M16_octanol<br>M16_octanol | M16_octanol<br>M16_octanolH2* | M16_octanol<br>M16_octanolH* | M16_octanol<br>M16_octanol* | Comment       |
|--------|---------------------|------------------------------|-----------------------------|----------------------------|-------------------------------|------------------------------|-----------------------------|---------------|
| 1.000  | 1.39                | 62.47 %                      | 0.01 %                      | 0.00 %                     | 37.11 %                       | 0.41 %                       | 0.00 %                      | Stomach<br>pH |
| 1.200  | 1.39                | 62.31 %                      | 0.02 %                      | 0.00 %                     | 37.02 %                       | 0.65 %                       | 0.00 %                      |               |
| 2.000  | 1.43                | 60.18 %                      | 0.12 %                      | 0.00 %                     | 35.75 %                       | 3.94 %                       | 0.00 %                      |               |
| 3.000  | 1.70                | 44.07 %                      | 0.88 %                      | 0.00 %                     | 26.18 %                       | 28.87 %                      | 0.00 %                      |               |
| 4.000  | 2.38                | 11.99 %                      | 2.39 %                      | 0.00 %                     | 7.12 %                        | 78.50 %                      | 0.00 %                      | Blood pH      |
| 5.000  | 2.95                | 1.45 %                       | 2.89 %                      | 0.00 %                     | 0.86 %                        | 94.80 %                      | 0.00 %                      |               |
| 6.000  | 3.10                | 0.15 %                       | 2.95 %                      | 0.00 %                     | 0.09 %                        | 96.81 %                      | 0.00 %                      |               |
| 6.500  | 3.12                | 0.05 %                       | 2.95 %                      | 0.01 %                     | 0.03 %                        | 96.96 %                      | 0.00 %                      |               |
| 7.000  | 3.12                | 0.01 %                       | 2.95 %                      | 0.03 %                     | 0.01 %                        | 96.99 %                      | 0.00 %                      |               |
| 7.400  | 3.11                | 0.01 %                       | 2.95 %                      | 0.09 %                     | 0.00 %                        | 96.95 %                      | 0.00 %                      |               |
| 8.000  | 3.08                | 0.00 %                       | 2.95 %                      | 0.34 %                     | 0.00 %                        | 96.71 %                      | 0.00 %                      |               |
| 9.000  | 2.79                | 0.00 %                       | 2.86 %                      | 3.28 %                     | 0.00 %                        | 93.86 %                      | 0.00 %                      |               |
| 10.000 | 2.03                | 0.00 %                       | 2.21 %                      | 25.34 %                    | 0.00 %                        | 72.44 %                      | 0.01 %                      |               |
| 11.000 | 1.06                | 0.00 %                       | 0.67 %                      | 77.21 %                    | 0.00 %                        | 22.08 %                      | 0.05 %                      |               |
| 12.000 | 0.07                | 0.00 %                       | 0.08 %                      | 97.08 %                    | 0.00 %                        | 2.78 %                       | 0.06 %                      |               |

## Carbonate and acidity

Carbonate 0.105 mM  
 Acidity error 3.384 mM

## Other graphs

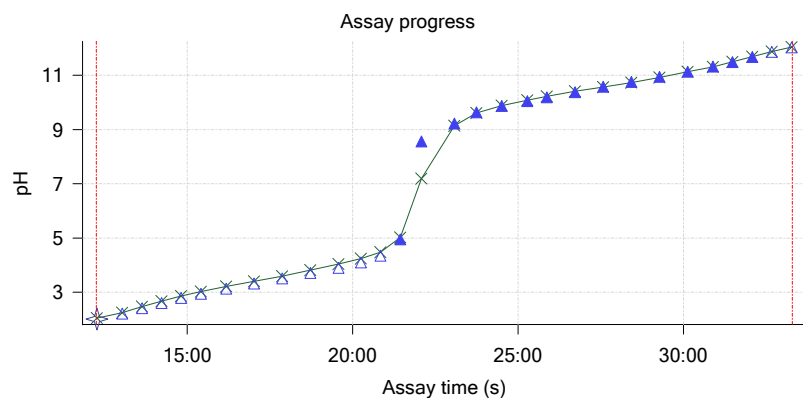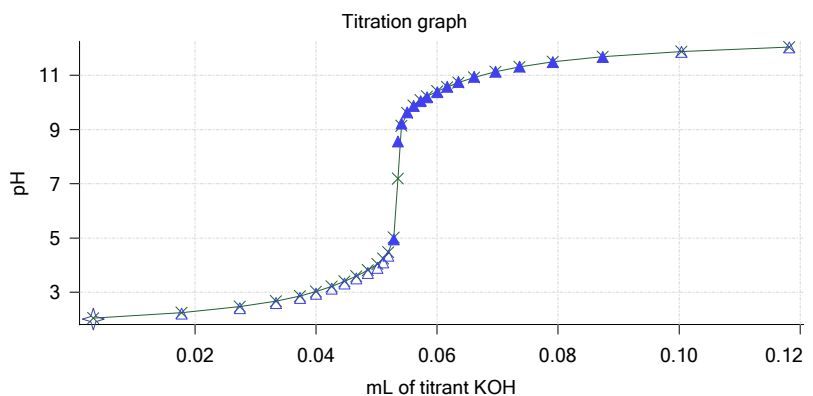

Sample name: **M16\_octanol**  
 Assay name: **pH-metric high logP**  
 Assay ID: **18C-01007**  
 Filename: **C:\Sirius\_T3\Mehtap\20180228\_exp28\_logP\_T3-2\18C-01007\_M16\_octanol\_pH-metric high logP.t3r**

Experiment start time: **3/1/2018 9:25:34 AM**  
 Analyst: **Pion**  
 Instrument ID: **T312060**

## Other graphs (continued)

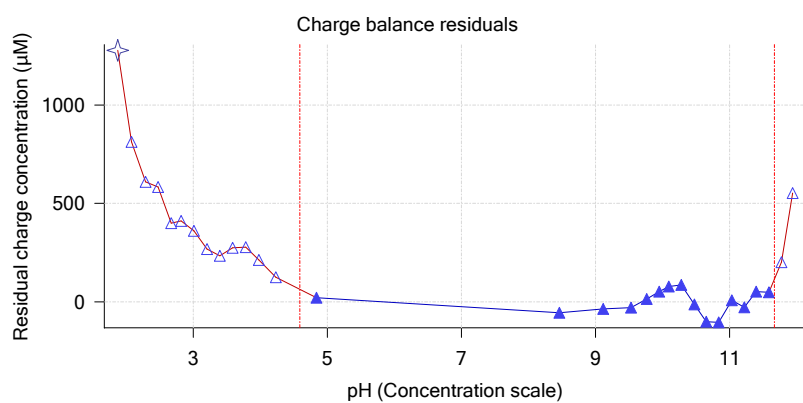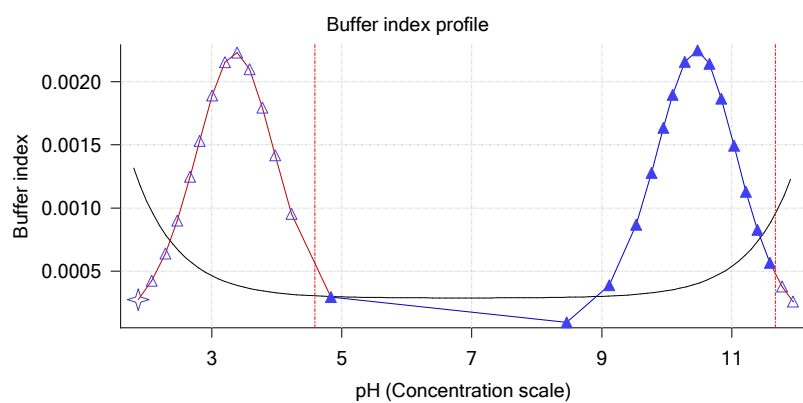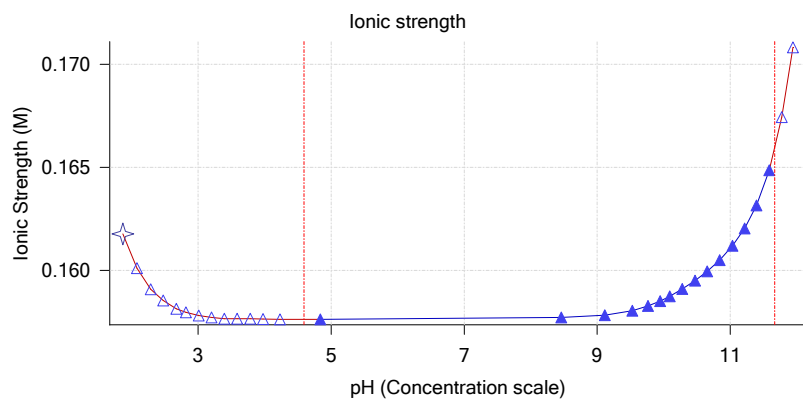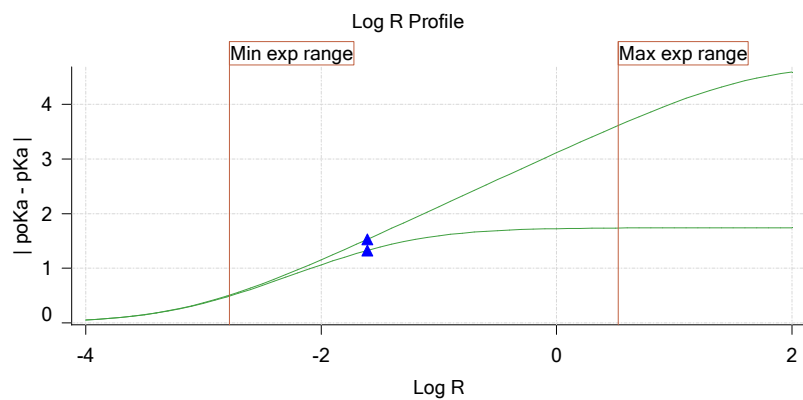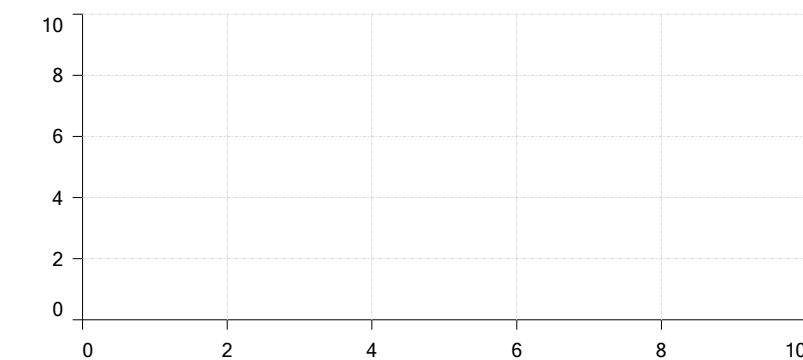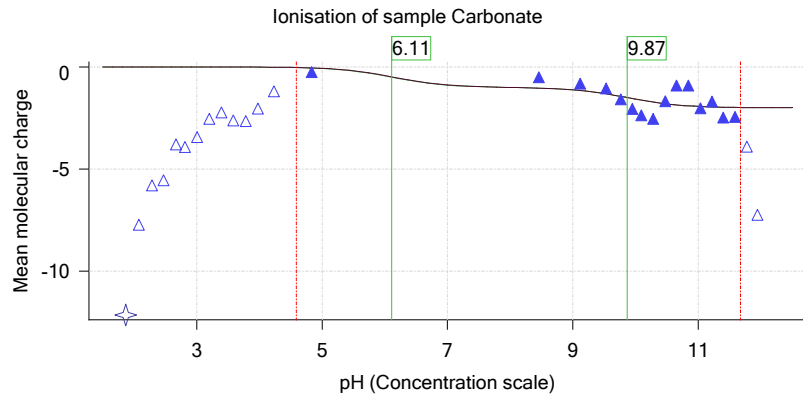

Sample name: **M16\_octanol**  
 Assay name: **pH-metric high logP**  
 Assay ID: **18C-01007**  
 Filename: **C:\Sirius\_T3\Mehtap\20180228\_exp28\_logP\_T3-2\18C-01007\_M16\_octanol\_pH-metric high logP.t3r**

Experiment start time: **3/1/2018 9:25:34 AM**  
 Analyst: **Pion**  
 Instrument ID: **T312060**

## pH-metric high logP Titration 2 of 3 18C-01007 Points 31 to 58

### Overall results

RMSD 0.048  
 Average ionic strength 0.173 M  
 Average temperature 25.0°C  
 Partition ratio 0.0752 : 1  
 Analyte concentration range 3835.8 µM to 4100.8 µM  
 Total points considered 14 of 28

### Warnings and errors

Errors None  
 Warnings One or more logP values out of range  
 Excessive carbonate concentration present  
 Excessive acidity error present

### Four-Plus parameters

|                                                                                |       |        |                     |                           |
|--------------------------------------------------------------------------------|-------|--------|---------------------|---------------------------|
|  | Alpha | 0.130  | 3/1/2018 9:25:33 AM | C:\Sirius_T3\HCl18B27.t3r |
|  | S     | 0.9970 | 3/1/2018 9:25:33 AM | C:\Sirius_T3\HCl18B27.t3r |
|  | jH    | 0.8    | 3/1/2018 9:25:33 AM | C:\Sirius_T3\HCl18B27.t3r |
|  | jOH   | -0.4   | 3/1/2018 9:25:33 AM | C:\Sirius_T3\HCl18B27.t3r |

### Titants

|                                                                                  |            |          |                     |                           |
|----------------------------------------------------------------------------------|------------|----------|---------------------|---------------------------|
|  | 0.50 M HCl | 0.993513 | 3/1/2018 9:25:34 AM | C:\Sirius_T3\HCl18B27.t3r |
|  | 0.50 M KOH | 0.999845 | 3/1/2018 9:25:34 AM | C:\Sirius_T3\KOH18B27.t3r |

### Sample

|                                                                                  |                                      |       |
|----------------------------------------------------------------------------------|--------------------------------------|-------|
|  | M16_octanol concentration factor     | 0.751 |
|  | Base pKa 1                           | 4.70  |
|  | Acid pKa 2                           | 8.94  |
|  | logP (XH <sub>2</sub> <sup>+</sup> ) | -5.98 |
|  | logP (neutral XH)                    | 3.25  |
|  | logP (X <sup>-</sup> )               | -1.62 |

### Sample graphs

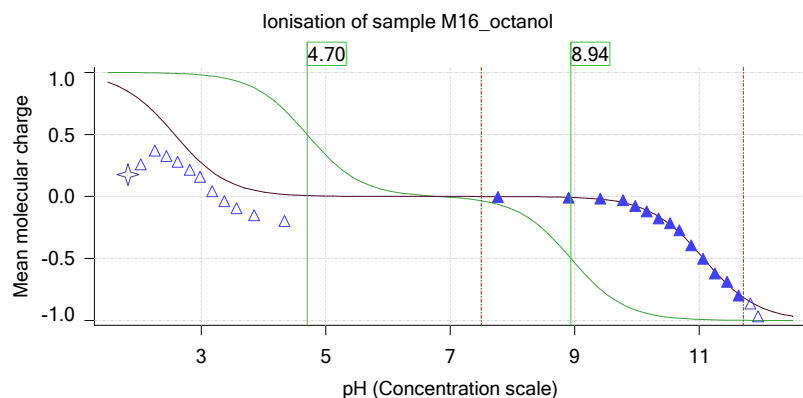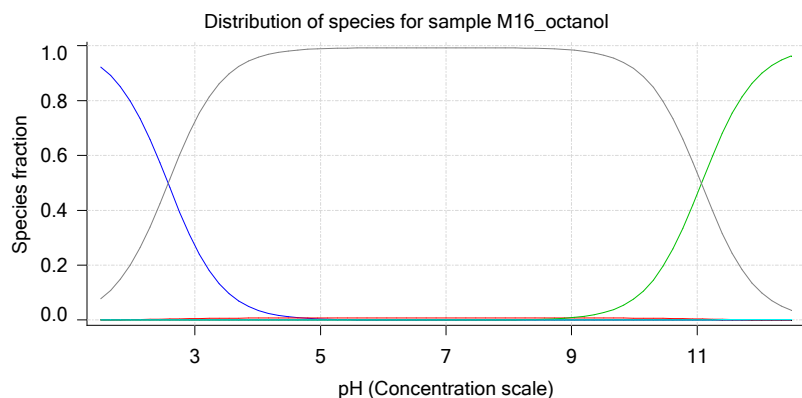

Sample name: **M16\_octanol**  
 Assay name: **pH-metric high logP**  
 Assay ID: **18C-01007**  
 Filename: **C:\Sirius\_T3\Mehtap\20180228\_exp28\_logP\_T3-2\18C-01007\_M16\_octanol\_pH-metric high logP.t3r**

Experiment start time: **3/1/2018 9:25:34 AM**  
 Analyst: **Pion**  
 Instrument ID: **T312060**

## Sample graphs (continued)

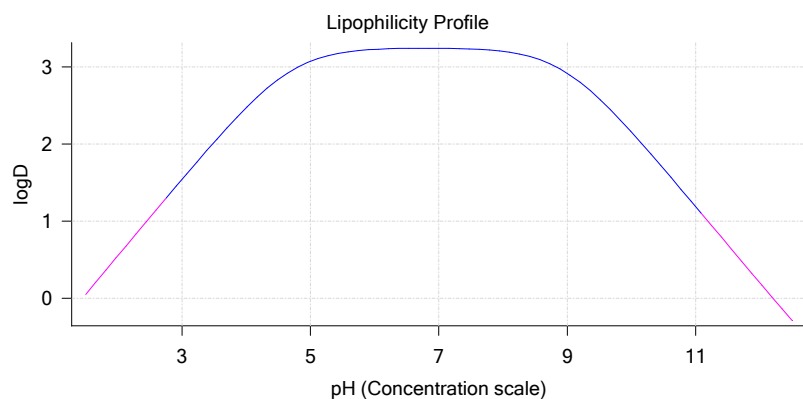

## Sample logD and percent species

| pH     | M16_octanol<br>logD | M16_octanol<br>M16_octanolH2 | M16_octanol<br>M16_octanolH | M16_octanol<br>M16_octanol | M16_octanol<br>M16_octanolH2* | M16_octanol<br>M16_octanolH* | M16_octanol<br>M16_octanol* | Comment       |
|--------|---------------------|------------------------------|-----------------------------|----------------------------|-------------------------------|------------------------------|-----------------------------|---------------|
| 1.000  | -0.45               | 97.38 %                      | 0.02 %                      | 0.00 %                     | 0.00 %                        | 2.60 %                       | 0.00 %                      | Stomach<br>pH |
| 1.200  | -0.25               | 95.91 %                      | 0.03 %                      | 0.00 %                     | 0.00 %                        | 4.06 %                       | 0.00 %                      |               |
| 2.000  | 0.55                | 78.80 %                      | 0.16 %                      | 0.00 %                     | 0.00 %                        | 21.04 %                      | 0.00 %                      |               |
| 3.000  | 1.54                | 27.10 %                      | 0.54 %                      | 0.00 %                     | 0.00 %                        | 72.36 %                      | 0.00 %                      |               |
| 4.000  | 2.47                | 3.58 %                       | 0.72 %                      | 0.00 %                     | 0.00 %                        | 95.70 %                      | 0.00 %                      | Blood pH      |
| 5.000  | 3.07                | 0.37 %                       | 0.74 %                      | 0.00 %                     | 0.00 %                        | 98.89 %                      | 0.00 %                      |               |
| 6.000  | 3.23                | 0.04 %                       | 0.74 %                      | 0.00 %                     | 0.00 %                        | 99.22 %                      | 0.00 %                      |               |
| 6.500  | 3.24                | 0.01 %                       | 0.74 %                      | 0.00 %                     | 0.00 %                        | 99.24 %                      | 0.00 %                      |               |
| 7.000  | 3.24                | 0.00 %                       | 0.74 %                      | 0.01 %                     | 0.00 %                        | 99.25 %                      | 0.00 %                      |               |
| 7.400  | 3.24                | 0.00 %                       | 0.74 %                      | 0.02 %                     | 0.00 %                        | 99.24 %                      | 0.00 %                      |               |
| 8.000  | 3.20                | 0.00 %                       | 0.74 %                      | 0.09 %                     | 0.00 %                        | 99.17 %                      | 0.00 %                      |               |
| 9.000  | 2.92                | 0.00 %                       | 0.74 %                      | 0.84 %                     | 0.00 %                        | 98.42 %                      | 0.00 %                      |               |
| 10.000 | 2.15                | 0.00 %                       | 0.68 %                      | 7.85 %                     | 0.00 %                        | 91.45 %                      | 0.01 %                      |               |
| 11.000 | 1.19                | 0.00 %                       | 0.40 %                      | 45.96 %                    | 0.00 %                        | 53.56 %                      | 0.08 %                      |               |
| 12.000 | 0.20                | 0.00 %                       | 0.08 %                      | 89.35 %                    | 0.00 %                        | 10.41 %                      | 0.16 %                      |               |

## Carbonate and acidity

Carbonate 0.833 mM  
 Acidity error 2.201 mM

## Other graphs

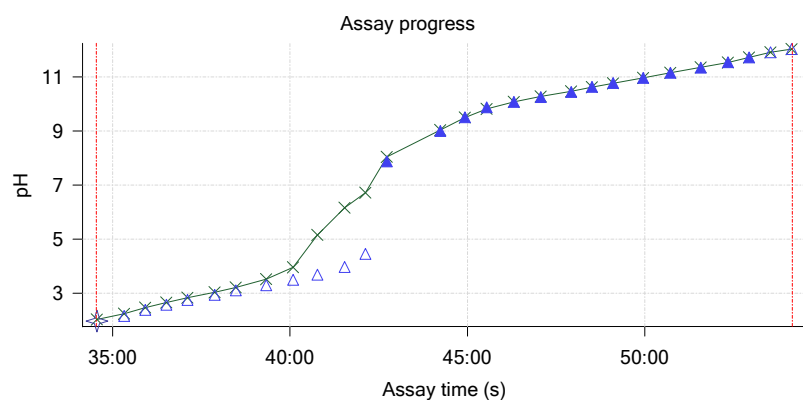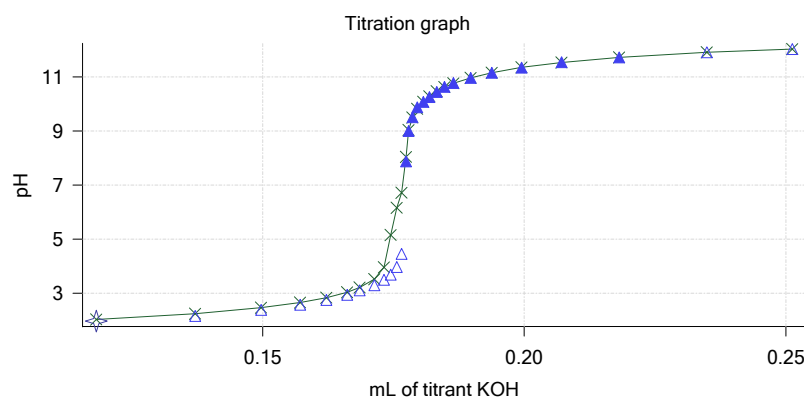



Sample name: **M16\_octanol**  
 Assay name: **pH-metric high logP**  
 Assay ID: **18C-01007**  
 Filename: **C:\Sirius\_T3\Mehtap\20180228\_exp28\_logP\_T3-2\18C-01007\_M16\_octanol\_pH-metric high logP.t3r**

Experiment start time: **3/1/2018 9:25:34 AM**  
 Analyst: **Pion**  
 Instrument ID: **T312060**

## Other graphs (continued)

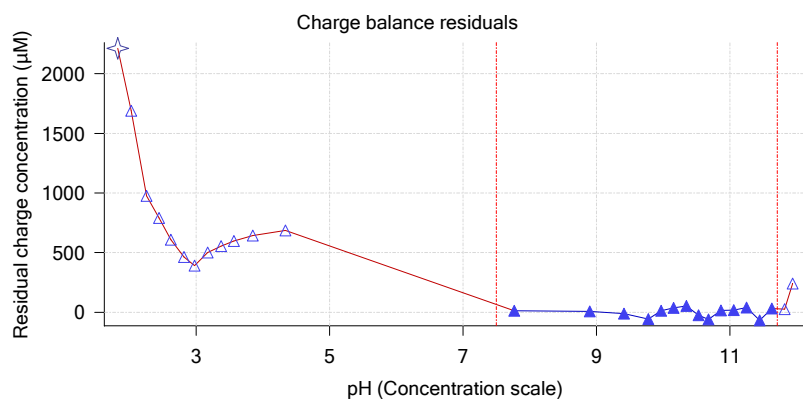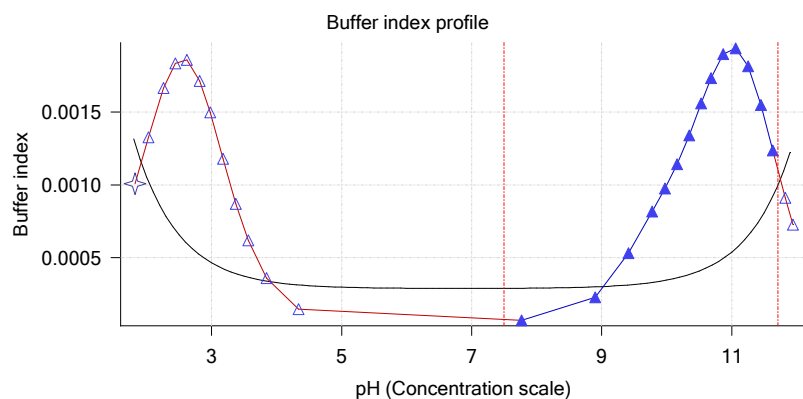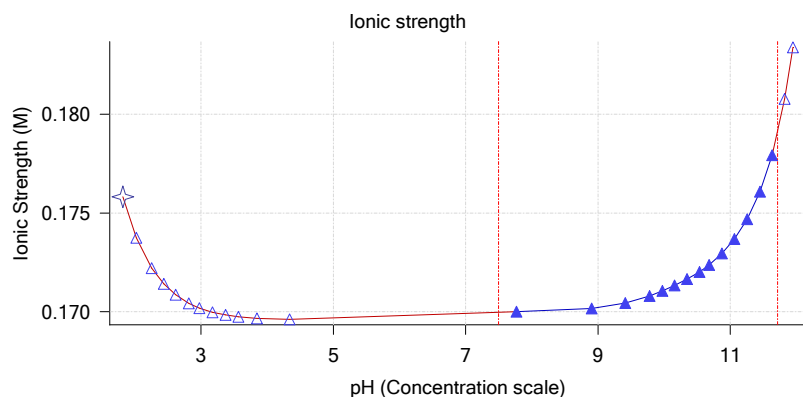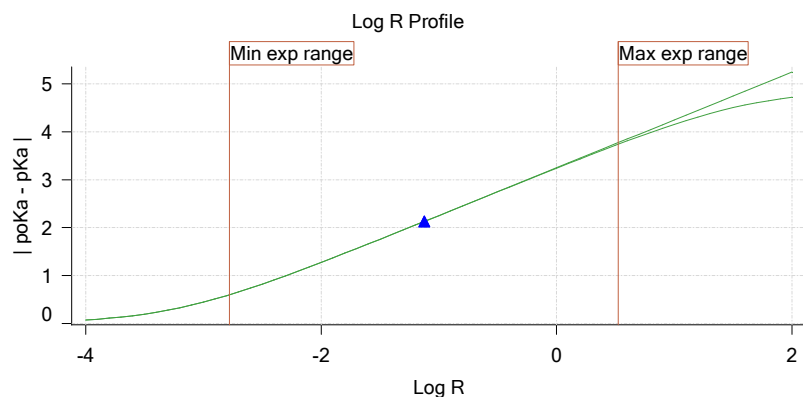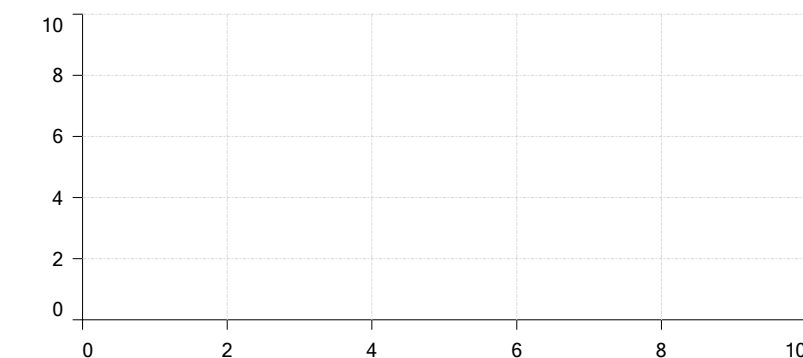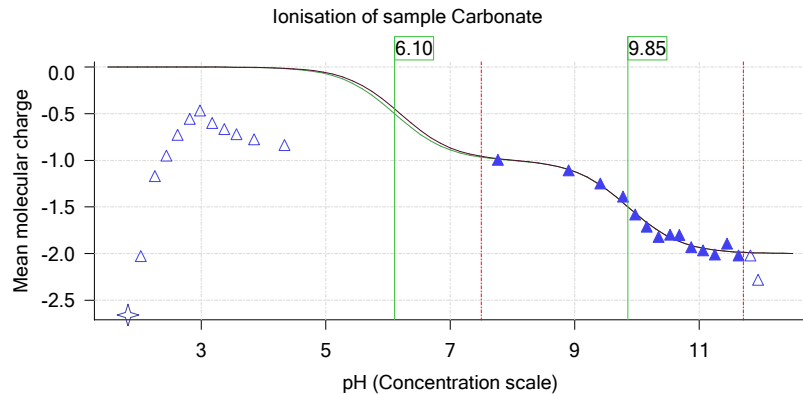

Sample name: **M16\_octanol**  
 Assay name: **pH-metric high logP**  
 Assay ID: **18C-01007**  
 Filename: **C:\Sirius\_T3\Mehtap\20180228\_exp28\_logP\_T3-2\18C-01007\_M16\_octanol\_pH-metric high logP.t3r**

Experiment start time: **3/1/2018 9:25:34 AM**  
 Analyst: **Pion**  
 Instrument ID: **T312060**

pH-metric high logP Titration 3 of 3 18C-01007 Points 59 to 86

## Overall results

RMSD 0.033  
 Average ionic strength 0.182 M  
 Average temperature 25.0°C  
 Partition ratio 0.2059 : 1  
 Analyte concentration range 2984.0 µM to 3160.6 µM  
 Total points considered 14 of 28

## Warnings and errors

Errors None  
 Warnings Excessive carbonate concentration present  
 Excessive acidity error present

## Four-Plus parameters

Alpha 0.130 3/1/2018 9:25:33 AM C:\Sirius\_T3\HCl18B27.t3r  
 S 0.9970 3/1/2018 9:25:33 AM C:\Sirius\_T3\HCl18B27.t3r  
 jH 0.8 3/1/2018 9:25:33 AM C:\Sirius\_T3\HCl18B27.t3r  
 jOH -0.4 3/1/2018 9:25:33 AM C:\Sirius\_T3\HCl18B27.t3r

## Titants

0.50 M HCl 0.993513 3/1/2018 9:25:34 AM C:\Sirius\_T3\HCl18B27.t3r  
 0.50 M KOH 0.999845 3/1/2018 9:25:34 AM C:\Sirius\_T3\KOH18B27.t3r

## Sample

M16\_octanol concentration factor 0.772  
 Base pKa 1 4.70  
 Acid pKa 2 8.94  
 logP (XH<sub>2</sub><sup>+</sup>) -0.97  
 logP (neutral XH) 3.02  
 logP (X<sup>-</sup>) -1.62

## Sample graphs

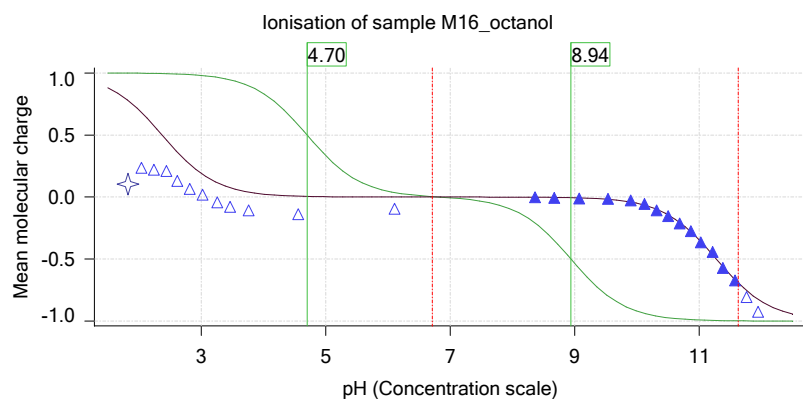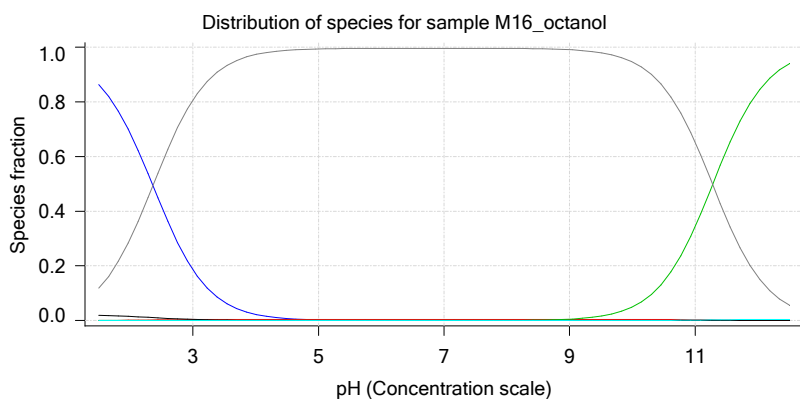

Sample name: **M16\_octanol**  
Assay name: **pH-metric high logP**  
Assay ID: **18C-01007**  
Filename: **C:\Sirius\_T3\Mehtap\20180228\_exp28\_logP\_T3-2\18C-01007\_M16\_octanol\_pH-metric high logP.t3r**

Experiment start time: **3/1/2018 9:25:34 AM**  
Analyst: **Pion**  
Instrument ID: **T312060**

## Sample graphs (continued)

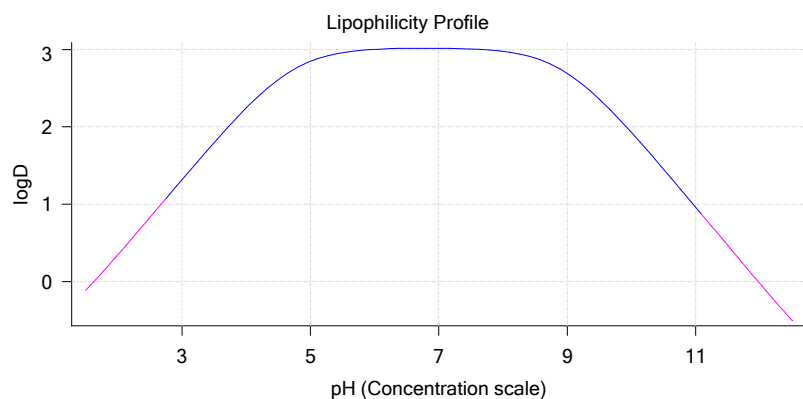

## Sample logD and percent species

| pH     | M16_octanol<br>logD | M16_octanol<br>M16_octanolH2 | M16_octanol<br>M16_octanolH | M16_octanol<br>M16_octanol | M16_octanol<br>M16_octanolH2* | M16_octanol<br>M16_octanolH* | M16_octanol<br>M16_octanol* | Comment       |
|--------|---------------------|------------------------------|-----------------------------|----------------------------|-------------------------------|------------------------------|-----------------------------|---------------|
| 1.000  | -0.50               | 93.84 %                      | 0.02 %                      | 0.00 %                     | 2.07 %                        | 4.07 %                       | 0.00 %                      | Stomach<br>pH |
| 1.200  | -0.36               | 91.65 %                      | 0.03 %                      | 0.00 %                     | 2.02 %                        | 6.29 %                       | 0.00 %                      |               |
| 2.000  | 0.34                | 68.62 %                      | 0.14 %                      | 0.00 %                     | 1.51 %                        | 29.73 %                      | 0.00 %                      |               |
| 3.000  | 1.32                | 18.60 %                      | 0.37 %                      | 0.00 %                     | 0.41 %                        | 80.61 %                      | 0.00 %                      |               |
| 4.000  | 2.24                | 2.24 %                       | 0.45 %                      | 0.00 %                     | 0.05 %                        | 97.26 %                      | 0.00 %                      | Blood pH      |
| 5.000  | 2.85                | 0.23 %                       | 0.46 %                      | 0.00 %                     | 0.01 %                        | 99.31 %                      | 0.00 %                      |               |
| 6.000  | 3.00                | 0.02 %                       | 0.46 %                      | 0.00 %                     | 0.00 %                        | 99.52 %                      | 0.00 %                      |               |
| 6.500  | 3.01                | 0.01 %                       | 0.46 %                      | 0.00 %                     | 0.00 %                        | 99.53 %                      | 0.00 %                      |               |
| 7.000  | 3.02                | 0.00 %                       | 0.46 %                      | 0.01 %                     | 0.00 %                        | 99.53 %                      | 0.00 %                      |               |
| 7.400  | 3.01                | 0.00 %                       | 0.46 %                      | 0.01 %                     | 0.00 %                        | 99.53 %                      | 0.00 %                      |               |
| 8.000  | 2.98                | 0.00 %                       | 0.46 %                      | 0.05 %                     | 0.00 %                        | 99.49 %                      | 0.00 %                      |               |
| 9.000  | 2.69                | 0.00 %                       | 0.46 %                      | 0.52 %                     | 0.00 %                        | 99.02 %                      | 0.00 %                      |               |
| 10.000 | 1.93                | 0.00 %                       | 0.44 %                      | 5.00 %                     | 0.00 %                        | 94.54 %                      | 0.02 %                      |               |
| 11.000 | 0.96                | 0.00 %                       | 0.30 %                      | 34.42 %                    | 0.00 %                        | 65.11 %                      | 0.17 %                      |               |
| 12.000 | -0.03               | 0.00 %                       | 0.07 %                      | 83.68 %                    | 0.00 %                        | 15.83 %                      | 0.41 %                      |               |

## Carbonate and acidity

Carbonate 0.548 mM  
Acidity error 2.297 mM

## Other graphs

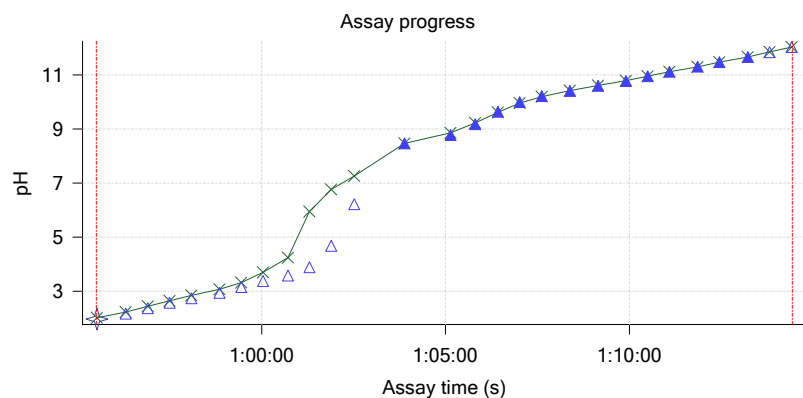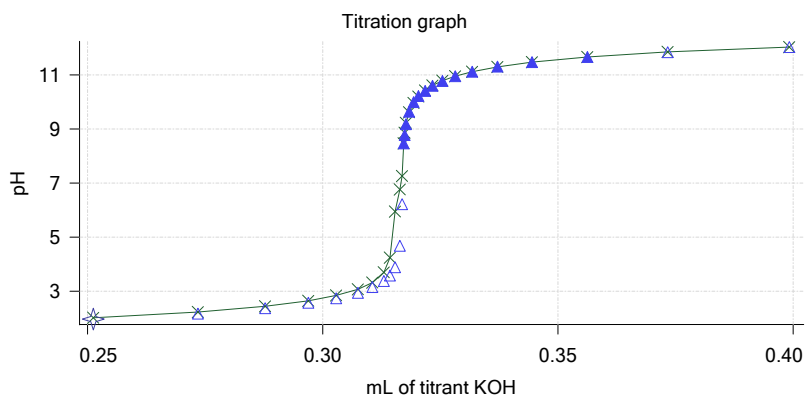

Sample name: **M16\_octanol**  
 Assay name: **pH-metric high logP**  
 Assay ID: **18C-01007**  
 Filename: **C:\Sirius\_T3\Mehtap\20180228\_exp28\_logP\_T3-2\18C-01007\_M16\_octanol\_pH-metric high logP.t3r**

Experiment start time: **3/1/2018 9:25:34 AM**  
 Analyst: **Pion**  
 Instrument ID: **T312060**

## Other graphs (continued)

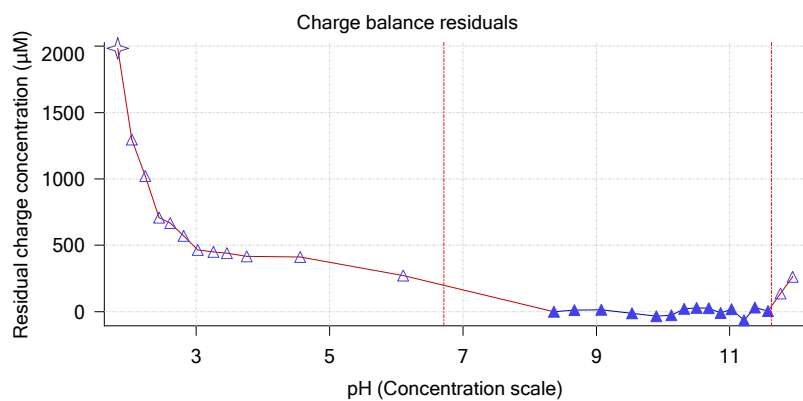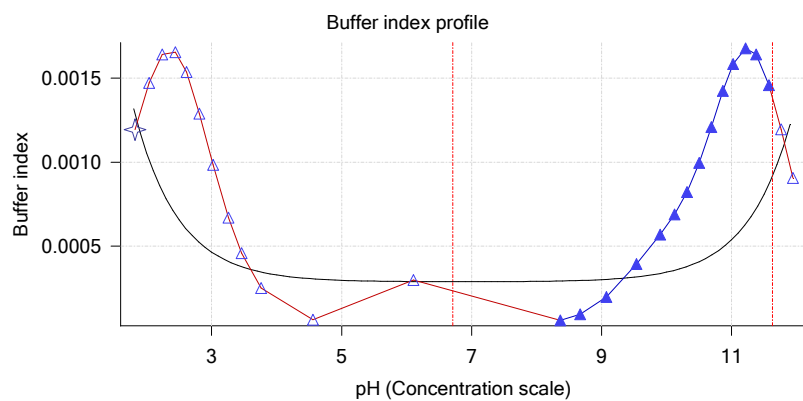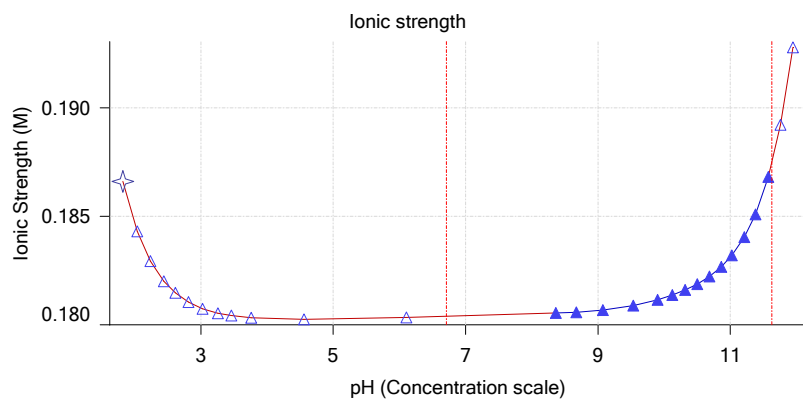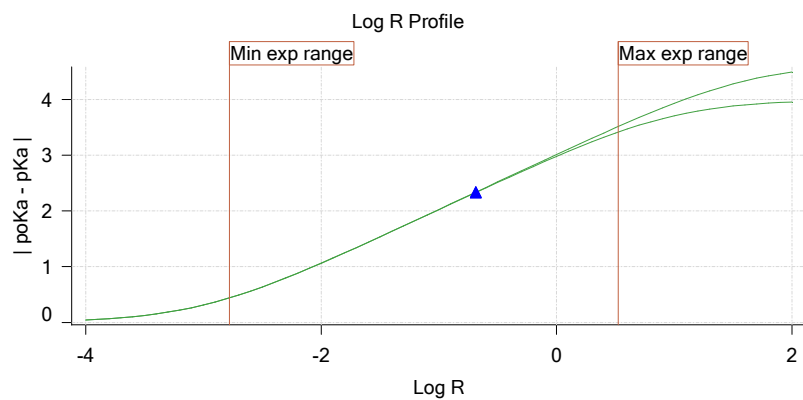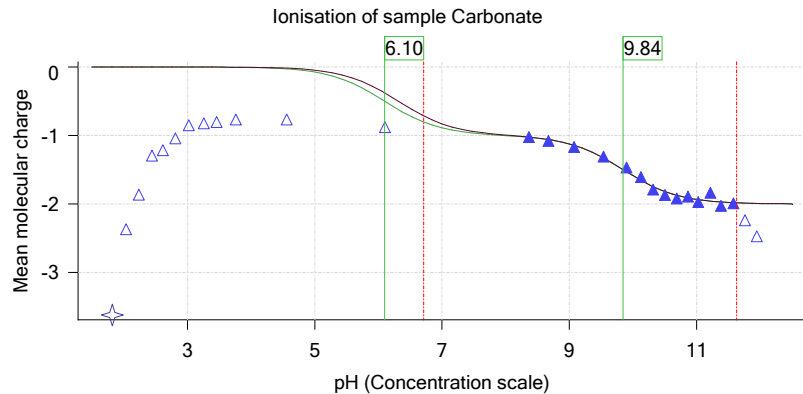

Sample name: **M16\_octanol**  
 Assay name: **pH-metric high logP**  
 Assay ID: **18C-01007**  
 Filename: **C:\Sirius\_T3\Mehtap\20180228\_exp28\_logP\_T3-2\18C-01007\_M16\_octanol\_pH-metric high logP.t3r**

Experiment start time: **3/1/2018 9:25:34 AM**  
 Analyst: **Pion**  
 Instrument ID: **T312060**

## Assay Model

| Settings                          | Value        | Date/Time changed    | Imported from      |
|-----------------------------------|--------------|----------------------|--------------------|
| Sample name                       | M16_octanol  | 2/27/2018 6:14:13 PM | User entered value |
| Sample by                         | Weight       |                      | Default value      |
| Sample weight                     | 0.001660 g   | 2/28/2018 4:25:40 PM | User entered value |
| Formula weight                    | 210.23 g/mol | 2/27/2018 5:08:55 PM | User entered value |
| Solubility                        | Unknown      |                      | Default value      |
| Molecular weight                  | 210.23       | 2/27/2018 5:08:55 PM | User entered value |
| Individual pKa ionic environments | No           |                      | Default value      |
| Number of pKas                    | 2            | 2/27/2018 5:08:55 PM | User entered value |
| Sample is a                       | Ampholyte    | 2/27/2018 5:08:55 PM | User entered value |
| pKa 1                             | 4.70         | 2/27/2018 5:08:55 PM | User entered value |
| Type                              | Base         | 2/27/2018 5:08:55 PM | User entered value |
| pKa 2                             | 8.94         | 2/27/2018 5:08:55 PM | User entered value |
| Type                              | Acid         | 2/27/2018 5:08:55 PM | User entered value |
| logp (XH2 +)                      | -0.97        | 2/27/2018 5:09:30 PM | User entered value |
| logP (neutral XH)                 | 1.47         | 2/27/2018 5:09:44 PM | User entered value |
| logP (X -)                        | -1.62        | 2/27/2018 5:09:50 PM | User entered value |

## Events

| Time    | Event             | Water      | Acid       | Base       | Octanol    | pH     | dpH/dt   | pH R-squared | pH SD   | dpH/dt time |
|---------|-------------------|------------|------------|------------|------------|--------|----------|--------------|---------|-------------|
| 9:11.9  | Initial pH = 3.56 |            |            |            |            |        |          |              |         |             |
| 12:16.4 | Data point 1      | 1.50000 mL | 0.04271 mL | 0.00320 mL | 0.04000 mL | 2.005  | -0.00710 | 0.21574      | 0.00076 | 10.0 s      |
| 13:02.6 | Data point 2      | 1.50000 mL | 0.04271 mL | 0.01778 mL | 0.04000 mL | 2.209  | -0.00559 | 0.12657      | 0.00078 | 10.0 s      |
| 13:38.3 | Data point 3      | 1.50000 mL | 0.04271 mL | 0.02740 mL | 0.04000 mL | 2.414  | 0.00086  | 0.04511      | 0.00020 | 10.0 s      |
| 14:13.8 | Data point 4      | 1.50000 mL | 0.04271 mL | 0.03340 mL | 0.04000 mL | 2.598  | -0.00678 | 0.14397      | 0.00088 | 10.0 s      |
| 14:49.3 | Data point 5      | 1.50000 mL | 0.04271 mL | 0.03737 mL | 0.04000 mL | 2.793  | -0.00172 | 0.13364      | 0.00023 | 10.0 s      |
| 15:24.9 | Data point 6      | 1.50000 mL | 0.04271 mL | 0.03998 mL | 0.04000 mL | 2.938  | -0.00257 | 0.34140      | 0.00022 | 10.0 s      |
| 16:10.7 | Data point 7      | 1.50000 mL | 0.04271 mL | 0.04262 mL | 0.04000 mL | 3.130  | -0.00330 | 0.56608      | 0.00022 | 10.0 s      |
| 17:01.6 | Data point 8      | 1.50000 mL | 0.04271 mL | 0.04471 mL | 0.04000 mL | 3.323  | -0.00522 | 0.10478      | 0.00080 | 10.0 s      |
| 17:52.6 | Data point 9      | 1.50000 mL | 0.04271 mL | 0.04666 mL | 0.04000 mL | 3.513  | -0.00408 | 0.55895      | 0.00027 | 10.0 s      |
| 18:43.6 | Data point 10     | 1.50000 mL | 0.04271 mL | 0.04859 mL | 0.04000 mL | 3.704  | -0.00652 | 0.61139      | 0.00041 | 10.0 s      |
| 19:34.5 | Data point 11     | 1.50000 mL | 0.04271 mL | 0.05014 mL | 0.04000 mL | 3.901  | -0.01015 | 0.66408      | 0.00061 | 10.0 s      |
| 20:15.1 | Data point 12     | 1.50000 mL | 0.04271 mL | 0.05113 mL | 0.04000 mL | 4.094  | -0.01157 | 0.56816      | 0.00076 | 10.0 s      |
| 20:50.6 | Data point 13     | 1.50000 mL | 0.04271 mL | 0.05195 mL | 0.04000 mL | 4.347  | -0.01522 | 0.64804      | 0.00093 | 10.5 s      |
| 21:26.5 | Data point 14     | 1.50000 mL | 0.04271 mL | 0.05287 mL | 0.04000 mL | 4.951  | -0.01799 | 0.87526      | 0.00095 | 13.0 s      |
| 22:05.0 | Data point 15     | 1.50000 mL | 0.04271 mL | 0.05355 mL | 0.04000 mL | 8.563  | -0.01946 | 0.98111      | 0.00097 | 34.0 s      |
| 23:04.4 | Data point 16     | 1.50000 mL | 0.04271 mL | 0.05412 mL | 0.04000 mL | 9.218  | -0.01863 | 0.95964      | 0.00094 | 14.5 s      |
| 23:44.4 | Data point 17     | 1.50000 mL | 0.04271 mL | 0.05506 mL | 0.04000 mL | 9.631  | -0.01929 | 0.94749      | 0.00098 | 10.5 s      |
| 24:30.7 | Data point 18     | 1.50000 mL | 0.04271 mL | 0.05614 mL | 0.04000 mL | 9.865  | -0.00801 | 0.59789      | 0.00051 | 10.5 s      |
| 25:17.1 | Data point 19     | 1.50000 mL | 0.04271 mL | 0.05729 mL | 0.04000 mL | 10.048 | -0.00508 | 0.13625      | 0.00068 | 10.0 s      |
| 25:52.5 | Data point 20     | 1.50000 mL | 0.04271 mL | 0.05837 mL | 0.04000 mL | 10.190 | -0.01000 | 0.36786      | 0.00081 | 10.0 s      |
| 26:43.4 | Data point 21     | 1.50000 mL | 0.04271 mL | 0.06002 mL | 0.04000 mL | 10.377 | -0.00716 | 0.23433      | 0.00073 | 10.0 s      |
| 27:34.3 | Data point 22     | 1.50000 mL | 0.04271 mL | 0.06167 mL | 0.04000 mL | 10.570 | -0.00128 | 0.01797      | 0.00047 | 10.0 s      |
| 28:25.3 | Data point 23     | 1.50000 mL | 0.04271 mL | 0.06355 mL | 0.04000 mL | 10.750 | -0.00897 | 0.69945      | 0.00053 | 10.0 s      |
| 29:16.4 | Data point 24     | 1.50000 mL | 0.04271 mL | 0.06611 mL | 0.04000 mL | 10.936 | -0.00376 | 0.05852      | 0.00077 | 10.0 s      |
| 30:07.5 | Data point 25     | 1.50000 mL | 0.04271 mL | 0.06966 mL | 0.04000 mL | 11.128 | -0.00187 | 0.33816      | 0.00016 | 10.0 s      |
| 30:53.5 | Data point 26     | 1.50000 mL | 0.04271 mL | 0.07361 mL | 0.04000 mL | 11.313 | -0.00175 | 0.34200      | 0.00015 | 10.0 s      |
| 31:29.0 | Data point 27     | 1.50000 mL | 0.04271 mL | 0.07912 mL | 0.04000 mL | 11.488 | 0.00172  | 0.30827      | 0.00015 | 10.0 s      |
| 32:04.7 | Data point 28     | 1.50000 mL | 0.04271 mL | 0.08739 mL | 0.04000 mL | 11.678 | 0.00337  | 0.74144      | 0.00019 | 10.0 s      |
| 32:40.4 | Data point 29     | 1.50000 mL | 0.04271 mL | 0.10040 mL | 0.04000 mL | 11.865 | -0.00296 | 0.02218      | 0.00098 | 10.0 s      |
| 33:16.3 | Data point 30     | 1.50000 mL | 0.04271 mL | 0.11820 mL | 0.04000 mL | 12.028 | 0.01264  | 0.63373      | 0.00078 | 10.0 s      |
| 34:33.6 | Data point 31     | 1.50000 mL | 0.16729 mL | 0.11820 mL | 0.14000 mL | 1.958  | -0.01998 | 0.98240      | 0.00100 | 10.0 s      |
| 35:19.9 | Data point 32     | 1.50000 mL | 0.16729 mL | 0.13709 mL | 0.14000 mL | 2.157  | 0.00252  | 0.43182      | 0.00019 | 10.0 s      |
| 35:55.6 | Data point 33     | 1.50000 mL | 0.16729 mL | 0.14972 mL | 0.14000 mL | 2.384  | 0.00020  | 0.00012      | 0.00092 | 10.0 s      |
| 36:31.2 | Data point 34     | 1.50000 mL | 0.16729 mL | 0.15720 mL | 0.14000 mL | 2.567  | 0.00609  | 0.52065      | 0.00042 | 10.0 s      |
| 37:06.8 | Data point 35     | 1.50000 mL | 0.16729 mL | 0.16218 mL | 0.14000 mL | 2.744  | 0.00186  | 0.31955      | 0.00016 | 10.0 s      |
| 37:52.7 | Data point 36     | 1.50000 mL | 0.16729 mL | 0.16616 mL | 0.14000 mL | 2.940  | 0.00060  | 0.05168      | 0.00013 | 10.5 s      |

Sample name: **M16\_octanol**  
 Assay name: **pH-metric high logP**  
 Assay ID: **18C-01007**  
 Filename: **C:\Sirius\_T3\Mehtap\20180228\_exp28\_logP\_T3-2\18C-01007\_M16\_octanol\_pH-metric high logP.t3r**

Experiment start time: **3/1/2018 9:25:34 AM**  
 Analyst: **Pion**  
 Instrument ID: **T312060**

## Events (continued)

| Time      | Event         | Water      | Acid       | Base       | Octanol    | pH     | dpH/dt   | pH R-squared | pH SD   | dpH/dt time         |
|-----------|---------------|------------|------------|------------|------------|--------|----------|--------------|---------|---------------------|
| 38:28.7   | Data point 37 | 1.50000 mL | 0.16729 mL | 0.16856 mL | 0.14000 mL | 3.099  | -0.00077 | 0.04289      | 0.00018 | 10.0 s              |
| 39:19.8   | Data point 38 | 1.50000 mL | 0.16729 mL | 0.17136 mL | 0.14000 mL | 3.295  | -0.00378 | 0.07695      | 0.00067 | 10.0 s              |
| 40:05.6   | Data point 39 | 1.50000 mL | 0.16729 mL | 0.17321 mL | 0.14000 mL | 3.493  | -0.00681 | 0.31042      | 0.00060 | 10.5 s              |
| 40:46.7   | Data point 40 | 1.50000 mL | 0.16729 mL | 0.17446 mL | 0.14000 mL | 3.684  | -0.00803 | 0.18101      | 0.00093 | 10.0 s              |
| 41:32.4   | Data point 41 | 1.50000 mL | 0.16729 mL | 0.17561 mL | 0.14000 mL | 3.965  | 0.00188  | 0.07002      | 0.00035 | 10.0 s              |
| 42:07.9   | Data point 42 | 1.50000 mL | 0.16729 mL | 0.17655 mL | 0.14000 mL | 4.455  | -0.01704 | 0.79788      | 0.00094 | 10.5 s              |
| 42:43.8   | Data point 43 | 1.50000 mL | 0.16729 mL | 0.17742 mL | 0.14000 mL | 7.873  | -0.08043 | 0.99747      | 0.00398 | Timed out at 59.5 s |
| 44:14.3   | Data point 44 | 1.50000 mL | 0.16729 mL | 0.17789 mL | 0.14000 mL | 9.006  | -0.01224 | 0.48541      | 0.00087 | 16.0 s              |
| 44:55.8   | Data point 45 | 1.50000 mL | 0.16729 mL | 0.17862 mL | 0.14000 mL | 9.515  | -0.01874 | 0.92592      | 0.00096 | 11.5 s              |
| 45:32.7   | Data point 46 | 1.50000 mL | 0.16729 mL | 0.17959 mL | 0.14000 mL | 9.879  | -0.00549 | 0.23712      | 0.00056 | 10.0 s              |
| 46:18.6   | Data point 47 | 1.50000 mL | 0.16729 mL | 0.18071 mL | 0.14000 mL | 10.073 | -0.01138 | 0.44990      | 0.00084 | 10.0 s              |
| 47:04.3   | Data point 48 | 1.50000 mL | 0.16729 mL | 0.18187 mL | 0.14000 mL | 10.258 | -0.00900 | 0.33929      | 0.00076 | 10.0 s              |
| 47:55.4   | Data point 49 | 1.50000 mL | 0.16729 mL | 0.18330 mL | 0.14000 mL | 10.446 | -0.00333 | 0.51756      | 0.00023 | 10.0 s              |
| 48:30.9   | Data point 50 | 1.50000 mL | 0.16729 mL | 0.18476 mL | 0.14000 mL | 10.630 | -0.00872 | 0.81800      | 0.00048 | 10.0 s              |
| 49:06.3   | Data point 51 | 1.50000 mL | 0.16729 mL | 0.18648 mL | 0.14000 mL | 10.779 | -0.00578 | 0.38967      | 0.00046 | 10.0 s              |
| 49:57.4   | Data point 52 | 1.50000 mL | 0.16729 mL | 0.18977 mL | 0.14000 mL | 10.967 | 0.00098  | 0.03975      | 0.00024 | 10.0 s              |
| 50:43.3   | Data point 53 | 1.50000 mL | 0.16729 mL | 0.19381 mL | 0.14000 mL | 11.158 | -0.00373 | 0.09690      | 0.00059 | 10.0 s              |
| 51:34.5   | Data point 54 | 1.50000 mL | 0.16729 mL | 0.19948 mL | 0.14000 mL | 11.348 | -0.00214 | 0.18325      | 0.00025 | 10.0 s              |
| 52:20.5   | Data point 55 | 1.50000 mL | 0.16729 mL | 0.20715 mL | 0.14000 mL | 11.543 | 0.00767  | 0.67130      | 0.00046 | 10.0 s              |
| 52:56.2   | Data point 56 | 1.50000 mL | 0.16729 mL | 0.21816 mL | 0.14000 mL | 11.723 | 0.00230  | 0.01310      | 0.00099 | 10.5 s              |
| 53:32.6   | Data point 57 | 1.50000 mL | 0.16729 mL | 0.23492 mL | 0.14000 mL | 11.912 | 0.00035  | 0.00040      | 0.00087 | 10.0 s              |
| 54:08.4   | Data point 58 | 1.50000 mL | 0.16729 mL | 0.25125 mL | 0.14000 mL | 12.032 | -0.00066 | 0.00154      | 0.00082 | 10.0 s              |
| 55:30.7   | Data point 59 | 1.50000 mL | 0.30701 mL | 0.25125 mL | 0.44000 mL | 1.958  | -0.01398 | 0.59830      | 0.00089 | 10.5 s              |
| 56:17.5   | Data point 60 | 1.50000 mL | 0.30701 mL | 0.27349 mL | 0.44000 mL | 2.167  | 0.01516  | 0.86723      | 0.00080 | 10.5 s              |
| 56:53.8   | Data point 61 | 1.50000 mL | 0.30701 mL | 0.28777 mL | 0.44000 mL | 2.365  | 0.00123  | 0.04714      | 0.00028 | 10.0 s              |
| 57:29.4   | Data point 62 | 1.50000 mL | 0.30701 mL | 0.29692 mL | 0.44000 mL | 2.567  | 0.00332  | 0.71527      | 0.00019 | 10.0 s              |
| 58:05.0   | Data point 63 | 1.50000 mL | 0.30701 mL | 0.30287 mL | 0.44000 mL | 2.737  | -0.00087 | 0.02536      | 0.00027 | 10.0 s              |
| 58:50.9   | Data point 64 | 1.50000 mL | 0.30701 mL | 0.30748 mL | 0.44000 mL | 2.936  | 0.00264  | 0.18981      | 0.00030 | 10.0 s              |
| 59:26.4   | Data point 65 | 1.50000 mL | 0.30701 mL | 0.31054 mL | 0.44000 mL | 3.144  | -0.00133 | 0.27873      | 0.00012 | 10.0 s              |
| 1:00:01.9 | Data point 66 | 1.50000 mL | 0.30701 mL | 0.31298 mL | 0.44000 mL | 3.378  | -0.00152 | 0.05010      | 0.00033 | 10.0 s              |
| 1:00:42.5 | Data point 67 | 1.50000 mL | 0.30701 mL | 0.31430 mL | 0.44000 mL | 3.580  | -0.00279 | 0.07835      | 0.00049 | 10.0 s              |
| 1:01:17.9 | Data point 68 | 1.50000 mL | 0.30701 mL | 0.31538 mL | 0.44000 mL | 3.878  | -0.00524 | 0.64775      | 0.00032 | 10.0 s              |
| 1:01:53.4 | Data point 69 | 1.50000 mL | 0.30701 mL | 0.31642 mL | 0.44000 mL | 4.674  | -0.00689 | 0.18723      | 0.00079 | 12.0 s              |
| 1:02:30.8 | Data point 70 | 1.50000 mL | 0.30701 mL | 0.31686 mL | 0.44000 mL | 6.215  | -0.01858 | 0.91294      | 0.00096 | 51.5 s              |
| 1:03:52.9 | Data point 71 | 1.50000 mL | 0.30701 mL | 0.31724 mL | 0.44000 mL | 8.470  | -0.01798 | 0.89260      | 0.00094 | 50.0 s              |
| 1:05:08.4 | Data point 72 | 1.50000 mL | 0.30701 mL | 0.31740 mL | 0.44000 mL | 8.775  | -0.01405 | 0.63869      | 0.00087 | 14.5 s              |
| 1:05:48.3 | Data point 73 | 1.50000 mL | 0.30701 mL | 0.31771 mL | 0.44000 mL | 9.175  | -0.01421 | 0.63693      | 0.00088 | 12.0 s              |
| 1:06:25.7 | Data point 74 | 1.50000 mL | 0.30701 mL | 0.31834 mL | 0.44000 mL | 9.635  | -0.00550 | 0.11202      | 0.00081 | 10.0 s              |
| 1:07:01.2 | Data point 75 | 1.50000 mL | 0.30701 mL | 0.31933 mL | 0.44000 mL | 10.000 | 0.00089  | 0.00892      | 0.00046 | 10.5 s              |
| 1:07:37.1 | Data point 76 | 1.50000 mL | 0.30701 mL | 0.32037 mL | 0.44000 mL | 10.223 | -0.00159 | 0.02094      | 0.00054 | 10.0 s              |
| 1:08:23.0 | Data point 77 | 1.50000 mL | 0.30701 mL | 0.32175 mL | 0.44000 mL | 10.415 | 0.00362  | 0.09900      | 0.00057 | 10.0 s              |
| 1:09:08.8 | Data point 78 | 1.50000 mL | 0.30701 mL | 0.32333 mL | 0.44000 mL | 10.600 | 0.00093  | 0.00262      | 0.00090 | 10.0 s              |
| 1:09:54.6 | Data point 79 | 1.50000 mL | 0.30701 mL | 0.32545 mL | 0.44000 mL | 10.784 | 0.01040  | 0.85611      | 0.00056 | 10.0 s              |
| 1:10:30.1 | Data point 80 | 1.50000 mL | 0.30701 mL | 0.32815 mL | 0.44000 mL | 10.962 | 0.00448  | 0.80191      | 0.00025 | 10.0 s              |
| 1:11:05.6 | Data point 81 | 1.50000 mL | 0.30701 mL | 0.33177 mL | 0.44000 mL | 11.121 | 0.00570  | 0.85507      | 0.00030 | 10.0 s              |
| 1:11:51.6 | Data point 82 | 1.50000 mL | 0.30701 mL | 0.33711 mL | 0.44000 mL | 11.309 | 0.00647  | 0.21129      | 0.00070 | 10.0 s              |
| 1:12:27.2 | Data point 83 | 1.50000 mL | 0.30701 mL | 0.34450 mL | 0.44000 mL | 11.473 | 0.00664  | 0.82184      | 0.00036 | 10.0 s              |
| 1:13:13.4 | Data point 84 | 1.50000 mL | 0.30701 mL | 0.35626 mL | 0.44000 mL | 11.668 | 0.00657  | 0.91736      | 0.00034 | 10.0 s              |
| 1:13:49.2 | Data point 85 | 1.50000 mL | 0.30701 mL | 0.37333 mL | 0.44000 mL | 11.850 | 0.00586  | 0.31317      | 0.00052 | 10.0 s              |
| 1:14:25.2 | Data point 86 | 1.50000 mL | 0.30701 mL | 0.39915 mL | 0.44000 mL | 12.033 | 0.00565  | 0.29376      | 0.00051 | 10.0 s              |
| 1:14:44.3 | Assay volumes | 1.50000 mL | 0.30701 mL | 0.39915 mL | 0.44000 mL |        |          |              |         |                     |

Sample name: **M16\_octanol**  
 Assay name: **pH-metric high logP**  
 Assay ID: **18C-01007**  
 Filename: **C:\Sirius\_T3\Mehtap\20180228\_exp28\_logP\_T3-2\18C-01007\_M16\_octanol\_pH-metric high logP.t3r**

Experiment start time: **3/1/2018 9:25:34 AM**  
 Analyst: **Pion**  
 Instrument ID: **T312060**

## Assay Settings

| Setting                             | Value              | Original Value | Date/Time changed | Imported from |
|-------------------------------------|--------------------|----------------|-------------------|---------------|
| <b>General Settings</b>             |                    |                |                   |               |
| Analyst name                        | Pion               |                |                   |               |
| <b>Standard Experiment Settings</b> |                    |                |                   |               |
| Number of titrations                | 3                  |                |                   |               |
| Minimum pH                          | 2.000              |                |                   |               |
| Maximum pH                          | 12.000             |                |                   |               |
| pH step between points of           | 0.200              |                |                   |               |
| Minimum titrant addition            | 0.00002 mL         |                |                   |               |
| Maximum titrant addition            | 0.10000 mL         |                |                   |               |
| Argon flow rate                     | 100%               |                |                   |               |
| Start titration using               | Cautious pH adjust |                |                   |               |
| <b>Advanced General Settings</b>    |                    |                |                   |               |
| Detect turbidity using              | None               |                |                   |               |
| Collect turbidity sensor data       | No                 |                |                   |               |
| Collect UV spectra                  | No                 |                |                   |               |
| Stir after titrant addition for     | 5 seconds          |                |                   |               |
| For titrant addition, stir at       | 10%                |                |                   |               |
| <b>Titration Pre-Dose</b>           |                    |                |                   |               |
| Titration pre-dose                  | None               |                |                   |               |
| <b>Assay Medium</b>                 |                    |                |                   |               |
| ISA water volume                    | 1.50 mL            |                |                   |               |
| Water added                         | Automatic          |                |                   |               |
| Partition solvent type              | Octanol            |                |                   |               |
| Partition volume                    | 0.040 mL           |                |                   |               |
| Partition solvent added             | Automatic          |                |                   |               |
| After partition addition, stir for  | 1 seconds          |                |                   |               |
| <b>Sample Sonication</b>            |                    |                |                   |               |
| Sonicate                            | Yes                |                |                   |               |
| Adjust pH for sonication            | No                 |                |                   |               |
| Sonicate for                        | 300 seconds        |                |                   |               |
| After sonication stir for           | 5 seconds          |                |                   |               |
| <b>Sample Dissolution</b>           |                    |                |                   |               |
| Perform a dissolution stage         | Yes                |                |                   |               |
| Adjust and hold pH for dissolution  | To start pH        |                |                   |               |
| Stir to dissolve for                | 120 seconds        |                |                   |               |
| For dissolution, stir at            | 10%                |                |                   |               |
| <b>Carbonate purge</b>              |                    |                |                   |               |
| Perform a carbonate purge           | No                 |                |                   |               |
| <b>Temperature Control</b>          |                    |                |                   |               |
| Wait for temperature                | Yes                |                |                   |               |
| Required start temperature          | 25.0°C             |                |                   |               |
| Acceptable deviation                | 0.5°C              |                |                   |               |
| Time to wait                        | 60 seconds         |                |                   |               |
| Stir speed of                       | 50%                |                |                   |               |
| <b>Titration 1</b>                  |                    |                |                   |               |
| Titrate from                        | Low to high pH     |                |                   |               |
| Adjust to start pH                  | Yes                |                |                   |               |
| After pH adjust stir for            | 30 seconds         |                |                   |               |
| Stir to allow partitioning for      | 15 seconds         |                |                   |               |
| Stirrer speed for partitioning      | 50%                |                |                   |               |
| <b>Titration 2</b>                  |                    |                |                   |               |
| Titrate from                        | Low to high pH     |                |                   |               |
| Add additional water                | 0.00 mL            |                |                   |               |
| Additional partition solvent volume | 0.100 mL           |                |                   |               |
| Additional partition solvent added  | Automatic          |                |                   |               |
| After pH adjust stir for            | 30 seconds         |                |                   |               |
| Stir to allow partitioning for      | 15 seconds         |                |                   |               |
| Stirrer speed for partitioning      | 55%                |                |                   |               |



Sample name: **M16\_octanol**  
 Assay name: **pH-metric high logP**  
 Assay ID: **18C-01007**  
 Filename: **C:\Sirius\_T3\Mehtap\20180228\_exp28\_logP\_T3-2\18C-01007\_M16\_octanol\_pH-metric high logP.t3r**

Experiment start time: **3/1/2018 9:25:34 AM**  
 Analyst: **Pion**  
 Instrument ID: **T312060**

## Assay Settings (continued)

| Setting                             | Value          | Original Value | Date/Time changed | Imported from |
|-------------------------------------|----------------|----------------|-------------------|---------------|
| <b>Titration 3</b>                  |                |                |                   |               |
| Titrate from                        | Low to high pH |                |                   |               |
| Add additional water                | 0.00 mL        |                |                   |               |
| Additional partition solvent volume | 0.300 mL       |                |                   |               |
| Additional partition solvent added  | Automatic      |                |                   |               |
| After pH adjust stir for            | 30 seconds     |                |                   |               |
| Stir to allow partitioning for      | 15 seconds     |                |                   |               |
| Stirrer speed for partitioning      | 60%            |                |                   |               |
| <b>Data Point Stability</b>         |                |                |                   |               |
| Stir during data point collection   | No             |                |                   |               |
| Delay before data point collection  | 0 seconds      |                |                   |               |
| Number of points to average         | 20 points      |                |                   |               |
| Time interval between points        | 0.50 seconds   |                |                   |               |
| Required maximum standard deviation | 0.00100 dpH/dt |                |                   |               |
| Stability timeout after             | 60 seconds     |                |                   |               |

## Calibration Settings

| Setting                   | Value  | Date/Time changed   | Imported from             |
|---------------------------|--------|---------------------|---------------------------|
| Four-Plus alpha           | 0.130  | 3/1/2018 9:25:33 AM | C:\Sirius_T3\HCl18B27.t3r |
| Four-Plus S               | 0.9970 | 3/1/2018 9:25:33 AM | C:\Sirius_T3\HCl18B27.t3r |
| Four-Plus jH              | 0.8    | 3/1/2018 9:25:33 AM | C:\Sirius_T3\HCl18B27.t3r |
| Four-Plus jOH             | -0.4   | 3/1/2018 9:25:33 AM | C:\Sirius_T3\HCl18B27.t3r |
| Base concentration factor | 1.000  | 3/1/2018 9:25:34 AM | C:\Sirius_T3\KOH18B27.t3r |
| Acid concentration factor | 0.994  | 3/1/2018 9:25:34 AM | C:\Sirius_T3\HCl18B27.t3r |

## Instrument Settings

| Setting              | Value                      | Batch Id    | Install date           |
|----------------------|----------------------------|-------------|------------------------|
| Instrument owner     | Merck                      |             |                        |
| Instrument ID        | T312060                    |             |                        |
| Instrument type      | T3 Simulator               |             |                        |
| Software version     | 1.1.3.0                    |             |                        |
| Dispenser module     |                            | T3DM1200361 | 3/31/2009 5:24:52 AM   |
| Dispenser 0          | Water                      |             | 3/31/2009 5:25:05 AM   |
| Syringe volume       | 2.5 mL                     |             |                        |
| Firmware version     | 1.2.1(r2)                  |             |                        |
| Titrant              | Water (0.15 M KCl)         | 02-06-2018  | 2/27/2018 10:05:59 AM  |
| Dispenser 2          | Acid                       |             | 3/31/2009 5:25:11 AM   |
| Syringe volume       | 0.5 mL                     |             |                        |
| Firmware version     | 1.2.1(r2)                  |             |                        |
| Titrant              | Acid (0.5 M HCl)           | 02-27-2018  | 2/27/2018 10:27:22 AM  |
| Dispenser 1          | Base                       |             | 3/31/2009 5:25:21 AM   |
| Syringe volume       | 0.5 mL                     |             |                        |
| Firmware version     | 1.2.1(r2)                  |             |                        |
| Titrant              | Base (0.5 M KOH)           | 9/22/2017   | 2/27/2018 10:21:22 AM  |
| Dispenser 5          | Cosolvent                  |             | 3/31/2009 5:26:24 AM   |
| Syringe volume       | 2.5 mL                     |             |                        |
| Firmware version     | 1.2.1(r2)                  |             |                        |
| Distribution valve 5 | Distribution Valve         |             | 3/31/2009 5:28:19 AM   |
| Firmware version     | 1.1.3                      |             |                        |
| Port A               | Methanol (80%, 0.15 M KCl) | 09-26-17    | 2/7/2018 9:42:01 AM    |
| Port B               | Cyclohexane                | 11-01-17    | 2/27/2018 10:37:57 AM  |
| Dispenser 3          | Buffer                     |             | 8/3/2010 5:05:16 AM    |
| Syringe volume       | 0.5 mL                     |             |                        |
| Firmware version     | 1.2.1(r2)                  |             |                        |
| Titrant              | Dodecane                   | 2018/01/31  | 2/28/2018 10:18:04 AM  |
| Dispenser 6          | Octanol                    |             | 10/22/2010 10:52:43 AM |



Sample name: **M16\_octanol**  
 Assay name: **pH-metric high logP**  
 Assay ID: **18C-01007**  
 Filename: **C:\Sirius\_T3\Mehtap\20180228\_exp28\_logP\_T3-2\18C-01007\_M16\_octanol\_pH-metric high logP.t3r**

Experiment start time: **3/1/2018 9:25:34 AM**  
 Analyst: **Pion**  
 Instrument ID: **T312060**

## Instrument Settings (continued)

| Setting                                   | Value                      | Batch Id    | Install date           |
|-------------------------------------------|----------------------------|-------------|------------------------|
| Syringe volume                            | 0.5 mL                     |             |                        |
| Firmware version                          | 1.2.1(r2)                  |             |                        |
| Titration                                 | Octanol                    | 01-31-2018  | 2/27/2018 9:59:35 AM   |
| Titration                                 |                            | T3TM1200161 | 3/31/2009 5:24:17 AM   |
| Horizontal axis firmware version          | 1.17 AI1DI2DO2 Stepper 2   |             |                        |
| Vertical axis firmware version            | 1.17 AI1DI2DO2 Stepper 2   |             |                        |
| Chassis I/O firmware version              | 1.11 AI1DI0DO4 Norgren I/O |             |                        |
| Probe I/O firmware version                | 1.1.1                      |             |                        |
| Electrode                                 | T3 Electrode               | T3E0923     | 1/23/2018 2:01:00 PM   |
| E0 calibration                            | +4.30 mV                   |             | 3/1/2018 9:26:01 AM    |
| Filling solution                          | 3M KCl                     | KCL097      | 2/27/2018 9:49:43 AM   |
| Liquids                                   |                            |             |                        |
| Wash 1                                    | 50% IPA:50% Water          |             | 2/28/2018 10:23:32 AM  |
| Wash 2                                    | 0.5% Triton X-100 in H2O   |             | 2/28/2018 10:23:34 AM  |
| Buffer position 1                         | pH7 Wash                   |             | 2/28/2018 10:24:06 AM  |
| Buffer position 2                         | pH 7                       |             | 2/28/2018 10:24:08 AM  |
| Storage position                          |                            |             | 2/28/2018 10:21:14 AM  |
| Wash water                                | 8.3e+003 mL                | 02-27-2018  | 2/27/2018 9:54:39 AM   |
| Waste                                     | 7.2e+003 mL                |             | 11/28/2017 10:36:29 AM |
| Temperature controller                    |                            |             | 8/5/2010 6:35:13 AM    |
| Turbidity detector                        |                            |             | 3/31/2009 5:24:45 AM   |
| Spectrometer                              |                            | 074811      | 11/23/2010 11:22:28 AM |
| Dip probe                                 |                            | 10196       |                        |
| Wavelength coefficient A0                 | 183.333                    |             |                        |
| Wavelength coefficient A1                 | 2.21568                    |             |                        |
| Wavelength coefficient A2                 | -0.000289308               |             |                        |
| Total lamp lit time                       | 112:08:55                  |             | 11/23/2010 11:22:28 AM |
| Calibrated on                             | 2/27/2018 10:40:38 AM      |             |                        |
| Integration time                          | 40                         |             |                        |
| Scans averaged                            | 10                         |             |                        |
| Autoloader                                |                            | T3AL1200345 | 11/10/2015 9:34:13 AM  |
| Left-right axis firmware version          | 1.17 AI1DI2DO2 Stepper 2   |             |                        |
| Front-back axis firmware version          | 1.17 AI1DI2DO2 Stepper 2   |             |                        |
| Vertical axis firmware version            | 1.17 AI1DI2DO2 Stepper 2   |             |                        |
| Chassis I/O firmware version              | 1.11 AI1DI0DO4 Norgren I/O |             |                        |
| Configuration                             |                            |             |                        |
| Alternate titration position              | Titration position         |             |                        |
| Alternate reference position              | Reference position         |             |                        |
| Maximum standard vial volume              | 3.50 mL                    |             |                        |
| Maximum alternate vial volume             | 25.00 mL                   |             |                        |
| Automatic action idle period              | 5 minute(s)                |             |                        |
| Titration tube volume                     | 1.3 mL                     |             |                        |
| Syringe flush count                       | 3.50                       |             |                        |
| Flowing wash pump volume                  | 20.0 mL                    |             |                        |
| Flowing wash stir duration                | 5 s                        |             |                        |
| Flowing wash stir speed                   | 30%                        |             |                        |
| Solvent wash stir duration                | 5 s                        |             |                        |
| Solvent wash stir speed                   | 30%                        |             |                        |
| Surfactant wash stir duration             | 5 s                        |             |                        |
| Surfactant wash stir speed                | 30%                        |             |                        |
| E0 calibration minimum number of points   | 10                         |             |                        |
| E0 calibration maximum standard deviation | 0.01500                    |             |                        |
| E0 calibration timeout period             | 60 s                       |             |                        |
| E0 calibration stir duration              | 5 s                        |             |                        |
| E0 calibration preparation stir speed     | 30%                        |             |                        |
| E0 calibration buffer wash stir duration  | 5 s                        |             |                        |
| E0 calibration buffer wash stir speed     | 30%                        |             |                        |
| E0 calibration reading stir speed         | 0%                         |             |                        |

|              |                                                                                                   |                        |                            |
|--------------|---------------------------------------------------------------------------------------------------|------------------------|----------------------------|
| Sample name: | <b>M16_octanol</b>                                                                                | Experiment start time: | <b>3/1/2018 9:25:34 AM</b> |
| Assay name:  | <b>pH-metric high logP</b>                                                                        | Analyst:               | <b>Pion</b>                |
| Assay ID:    | <b>18C-01007</b>                                                                                  | Instrument ID:         | <b>T312060</b>             |
| Filename:    | <b>C:\Sirius_T3\Mehtap\20180228_exp28_logP_T3-2\18C-01007_M16_octanol_pH-metric high logP.t3r</b> |                        |                            |

## Instrument Settings (continued)

| Setting                                     | Value   | Batch Id | Install date |
|---------------------------------------------|---------|----------|--------------|
| Spectrometer calibration stir duration      | 5 s     |          |              |
| Spectrometer calibration stir speed         | 30%     |          |              |
| Spectrometer calibration wash pump volume   | 20.0 mL |          |              |
| Spectrometer calibration wash stir duration | 5 s     |          |              |
| Spectrometer calibration wash stir speed    | 30%     |          |              |
| Overhead dispense height                    | 10000   |          |              |

## Refinement Settings

| Setting                        | Value    | Default value |
|--------------------------------|----------|---------------|
| Turbidity detection method     | None     | None          |
| Turbidity wavelength to assess | 500.0 nm | 500.0 nm      |
| Turbidity maximum absorbance   | 0.100    | 0.100         |
| Turbidity probe threshold      | 50.00    | 50.00         |

## Experiment Log

[2:48] Air gap created for Water (0.15 M KCl)  
 [2:49] Air gap created for Acid (0.5 M HCl)  
 [2:49] Air gap created for Base (0.5 M KOH)  
 [2:49] Air gap released for Water (0.15 M KCl)  
 [2:53] Titrator arm moved over Titration position  
 [2:53] Titration 1 of 3  
 [2:53] Adding initial titrants  
 [2:53] Automatically add 1.50000 mL of water  
 [3:18] Dispensed 1.500000 mL of Water (0.15 M KCl)  
 [3:23] Titrator arm moved over Drain  
 [9:04] Titrator arm moved to Titration position  
 [9:04] Argon flow rate set to 100  
 [9:04] Stirrer speed set to 10  
 [9:09] Automatically add 0.04000 mL of Octanol  
 [9:10] Dispensed 0.040005 mL of Octanol  
 [9:11] Initial pH = 3.56  
 [9:11] Iterative adjust 3.56 -> 2.00  
 [9:11] pH 3.56 -> 2.00  
 [9:13] Air gap released for Acid (0.5 M HCl)  
 [9:14] Dispensed 0.041439 mL of Acid (0.5 M HCl)  
 [9:19] pH 2.01 -> 2.00  
 [9:19] Dispensed 0.001270 mL of Acid (0.5 M HCl)  
 [9:24] Holding pH 2.00  
 [11:24] Stirrer speed set to 0  
 [11:24] Stirrer speed set to 50  
 [11:24] Iterative adjust 1.97 -> 2.00  
 [11:24] pH 1.97 -> 2.00  
 [11:25] Air gap released for Base (0.5 M KOH)  
 [11:26] Dispensed 0.003198 mL of Base (0.5 M KOH)  
 [12:16] Stirrer speed set to 0  
 [12:26] Datapoint id 1 collected  
 [12:26] Stirrer speed set to 50  
 [12:31] pH 2.01 -> 2.21  
 [12:31] Using cautious pH adjust  
 [12:31] Dispensed 0.007714 mL of Base (0.5 M KOH)  
 [12:37] Stepping pH = 2.10  
 [12:37] Dispensed 0.005903 mL of Base (0.5 M KOH)  
 [12:42] Stepping pH = 2.19  
 [12:42] Dispensed 0.000964 mL of Base (0.5 M KOH)  
 [12:47] Stepping pH = 2.21  
 [13:02] Stirrer speed set to 0  
 [13:12] Datapoint id 2 collected

Sample name: **M16\_octanol**  
Assay name: **pH-metric high logP**  
Assay ID: **18C-01007**  
Filename: **C:\Sirius\_T3\Mehtap\20180228\_exp28\_logP\_T3-2\18C-01007\_M16\_octanol\_pH-metric high logP.t3r**

Experiment start time: **3/1/2018 9:25:34 AM**  
Analyst: **Pion**  
Instrument ID: **T312060**

## Experiment Log (continued)

[13:12] Charge balance equation is out by 5.6%  
[13:12] Stirrer speed set to 50  
[13:17] pH 2.21 -> 2.41  
[13:17] Using charge balance adjust  
[13:18] Dispensed 0.009619 mL of Base (0.5 M KOH)  
[13:38] Stirrer speed set to 0  
[13:48] Datapoint id 3 collected  
[13:48] Charge balance equation is out by -0.3%  
[13:48] Stirrer speed set to 50  
[13:53] pH 2.42 -> 2.62  
[13:53] Using charge balance adjust  
[13:53] Dispensed 0.005997 mL of Base (0.5 M KOH)  
[14:13] Stirrer speed set to 0  
[14:23] Datapoint id 4 collected  
[14:23] Charge balance equation is out by -11.6%  
[14:23] Stirrer speed set to 50  
[14:29] pH 2.60 -> 2.80  
[14:29] Using charge balance adjust  
[14:29] Dispensed 0.003975 mL of Base (0.5 M KOH)  
[14:49] Stirrer speed set to 0  
[14:59] Datapoint id 5 collected  
[14:59] Charge balance equation is out by -5.5%  
[14:59] Stirrer speed set to 50  
[15:04] pH 2.80 -> 3.00  
[15:04] Using charge balance adjust  
[15:04] Dispensed 0.002611 mL of Base (0.5 M KOH)  
[15:24] Stirrer speed set to 0  
[15:34] Datapoint id 6 collected  
[15:34] Charge balance equation is out by -31.1%  
[15:34] Stirrer speed set to 50  
[15:40] pH 2.94 -> 3.14  
[15:40] Using cautious pH adjust  
[15:40] Dispensed 0.000988 mL of Base (0.5 M KOH)  
[15:45] Stepping pH = 3.01  
[15:45] Dispensed 0.001152 mL of Base (0.5 M KOH)  
[15:50] Stepping pH = 3.09  
[15:50] Dispensed 0.000494 mL of Base (0.5 M KOH)  
[15:55] Stepping pH = 3.13  
[16:10] Stirrer speed set to 0  
[16:20] Datapoint id 7 collected  
[16:20] Charge balance equation is out by -33.7%  
[16:20] Stirrer speed set to 50  
[16:25] pH 3.14 -> 3.34  
[16:25] Using cautious pH adjust  
[16:25] Dispensed 0.000729 mL of Base (0.5 M KOH)  
[16:31] Stepping pH = 3.20  
[16:31] Dispensed 0.000823 mL of Base (0.5 M KOH)  
[16:36] Stepping pH = 3.28  
[16:36] Dispensed 0.000400 mL of Base (0.5 M KOH)  
[16:41] Stepping pH = 3.32  
[16:41] Dispensed 0.000141 mL of Base (0.5 M KOH)  
[16:46] Stepping pH = 3.33  
[17:01] Stirrer speed set to 0  
[17:11] Datapoint id 8 collected  
[17:11] Charge balance equation is out by -44.8%  
[17:11] Stirrer speed set to 50  
[17:16] pH 3.33 -> 3.53  
[17:16] Using cautious pH adjust  
[17:16] Dispensed 0.000588 mL of Base (0.5 M KOH)

Sample name: **M16\_octanol**  
Assay name: **pH-metric high logP**  
Assay ID: **18C-01007**  
Filename: **C:\Sirius\_T3\Mehtap\20180228\_exp28\_logP\_T3-2\18C-01007\_M16\_octanol\_pH-metric high logP.t3r**

Experiment start time: **3/1/2018 9:25:34 AM**  
Analyst: **Pion**  
Instrument ID: **T312060**

## Experiment Log (continued)

[17:22] Stepping pH = 3.39  
[17:22] Dispensed 0.000729 mL of Base (0.5 M KOH)  
[17:27] Stepping pH = 3.46  
[17:27] Dispensed 0.000447 mL of Base (0.5 M KOH)  
[17:32] Stepping pH = 3.51  
[17:32] Dispensed 0.000188 mL of Base (0.5 M KOH)  
[17:37] Stepping pH = 3.52  
[17:52] Stirrer speed set to 0  
[18:02] Datapoint id 9 collected  
[18:02] Charge balance equation is out by -64.9%  
[18:02] Stirrer speed set to 50  
[18:07] pH 3.52 -> 3.72  
[18:07] Using cautious pH adjust  
[18:07] Dispensed 0.000564 mL of Base (0.5 M KOH)  
[18:13] Stepping pH = 3.58  
[18:13] Dispensed 0.000706 mL of Base (0.5 M KOH)  
[18:18] Stepping pH = 3.64  
[18:18] Dispensed 0.000564 mL of Base (0.5 M KOH)  
[18:23] Stepping pH = 3.71  
[18:23] Dispensed 0.000094 mL of Base (0.5 M KOH)  
[18:28] Stepping pH = 3.71  
[18:43] Stirrer speed set to 0  
[18:53] Datapoint id 10 collected  
[18:53] Charge balance equation is out by -71.8%  
[18:53] Stirrer speed set to 50  
[18:58] pH 3.71 -> 3.91  
[18:58] Using cautious pH adjust  
[18:58] Dispensed 0.000611 mL of Base (0.5 M KOH)  
[19:03] Stepping pH = 3.79  
[19:04] Dispensed 0.000588 mL of Base (0.5 M KOH)  
[19:09] Stepping pH = 3.87  
[19:09] Dispensed 0.000259 mL of Base (0.5 M KOH)  
[19:14] Stepping pH = 3.90  
[19:14] Dispensed 0.000094 mL of Base (0.5 M KOH)  
[19:19] Stepping pH = 3.91  
[19:34] Stirrer speed set to 0  
[19:44] Datapoint id 11 collected  
[19:44] Charge balance equation is out by -28.6%  
[19:44] Stirrer speed set to 50  
[19:49] pH 3.91 -> 4.11  
[19:49] Using cautious pH adjust  
[19:49] Dispensed 0.000706 mL of Base (0.5 M KOH)  
[19:54] Stepping pH = 4.05  
[19:55] Dispensed 0.000282 mL of Base (0.5 M KOH)  
[20:00] Stepping pH = 4.10  
[20:15] Stirrer speed set to 0  
[20:25] Datapoint id 12 collected  
[20:25] Charge balance equation is out by 30.4%  
[20:25] Stirrer speed set to 50  
[20:30] pH 4.10 -> 4.30  
[20:30] Using cautious pH adjust  
[20:30] Dispensed 0.000823 mL of Base (0.5 M KOH)  
[20:35] Stepping pH = 4.37  
[20:50] Stirrer speed set to 0  
[21:01] Datapoint id 13 collected  
[21:01] Charge balance equation is out by 50.0%  
[21:01] Stirrer speed set to 50  
[21:06] pH 4.36 -> 4.56  
[21:06] Using cautious pH adjust

Sample name: **M16\_octanol**  
Assay name: **pH-metric high logP**  
Assay ID: **18C-01007**  
Filename: **C:\Sirius\_T3\Mehtap\20180228\_exp28\_logP\_T3-2\18C-01007\_M16\_octanol\_pH-metric high logP.t3r**

Experiment start time: **3/1/2018 9:25:34 AM**  
Analyst: **Pion**  
Instrument ID: **T312060**

## Experiment Log (continued)

[21:06] Dispensed 0.000917 mL of Base (0.5 M KOH)  
[21:11] Stepping pH = 4.99  
[21:26] Stirrer speed set to 0  
[21:39] Datapoint id 14 collected  
[21:39] Charge balance equation is out by 50.0%  
[21:39] Stirrer speed set to 50  
[21:44] pH 4.97 -> 5.17  
[21:44] Using cautious pH adjust  
[21:44] Dispensed 0.000682 mL of Base (0.5 M KOH)  
[21:49] Stepping pH = 8.17  
[22:05] Stirrer speed set to 0  
[22:39] Datapoint id 15 collected  
[22:39] Charge balance equation is out by 50.0%  
[22:39] Stirrer speed set to 50  
[22:44] pH 8.55 -> 8.75  
[22:44] Using cautious pH adjust  
[22:44] Dispensed 0.000564 mL of Base (0.5 M KOH)  
[22:49] Stepping pH = 9.23  
[23:04] Stirrer speed set to 0  
[23:19] Datapoint id 16 collected  
[23:19] Charge balance equation is out by 50.0%  
[23:19] Stirrer speed set to 50  
[23:24] pH 9.22 -> 9.42  
[23:24] Using cautious pH adjust  
[23:24] Dispensed 0.000941 mL of Base (0.5 M KOH)  
[23:29] Stepping pH = 9.65  
[23:44] Stirrer speed set to 0  
[23:54] Datapoint id 17 collected  
[23:54] Charge balance equation is out by 50.0%  
[23:54] Stirrer speed set to 50  
[24:00] pH 9.63 -> 9.83  
[24:00] Using cautious pH adjust  
[24:00] Dispensed 0.000776 mL of Base (0.5 M KOH)  
[24:05] Stepping pH = 9.82  
[24:05] Dispensed 0.000047 mL of Base (0.5 M KOH)  
[24:10] Stepping pH = 9.82  
[24:10] Dispensed 0.000259 mL of Base (0.5 M KOH)  
[24:15] Stepping pH = 9.88  
[24:30] Stirrer speed set to 0  
[24:41] Datapoint id 18 collected  
[24:41] Charge balance equation is out by 30.2%  
[24:41] Stirrer speed set to 50  
[24:46] pH 9.87 -> 10.07  
[24:46] Using cautious pH adjust  
[24:46] Dispensed 0.000635 mL of Base (0.5 M KOH)  
[24:51] Stepping pH = 9.99  
[24:51] Dispensed 0.000282 mL of Base (0.5 M KOH)  
[24:56] Stepping pH = 10.02  
[24:56] Dispensed 0.000235 mL of Base (0.5 M KOH)  
[25:02] Stepping pH = 10.06  
[25:17] Stirrer speed set to 0  
[25:27] Datapoint id 19 collected  
[25:27] Charge balance equation is out by 7.6%  
[25:27] Stirrer speed set to 50  
[25:32] pH 10.05 -> 10.25  
[25:32] Using charge balance adjust  
[25:32] Dispensed 0.001082 mL of Base (0.5 M KOH)  
[25:52] Stirrer speed set to 0  
[26:02] Datapoint id 20 collected

Sample name: **M16\_octanol**  
Assay name: **pH-metric high logP**  
Assay ID: **18C-01007**  
Filename: **C:\Sirius\_T3\Mehtap\20180228\_exp28\_logP\_T3-2\18C-01007\_M16\_octanol\_pH-metric high logP.t3r**

Experiment start time: **3/1/2018 9:25:34 AM**  
Analyst: **Pion**  
Instrument ID: **T312060**

## Experiment Log (continued)

[26:02] Charge balance equation is out by -29.3%  
[26:02] Stirrer speed set to 50  
[26:07] pH 10.19 -> 10.39  
[26:07] Using cautious pH adjust  
[26:07] Dispensed 0.000517 mL of Base (0.5 M KOH)  
[26:12] Stepping pH = 10.25  
[26:12] Dispensed 0.000635 mL of Base (0.5 M KOH)  
[26:18] Stepping pH = 10.34  
[26:18] Dispensed 0.000329 mL of Base (0.5 M KOH)  
[26:23] Stepping pH = 10.37  
[26:23] Dispensed 0.000165 mL of Base (0.5 M KOH)  
[26:28] Stepping pH = 10.39  
[26:43] Stirrer speed set to 0  
[26:53] Datapoint id 21 collected  
[26:53] Charge balance equation is out by -61.1%  
[26:53] Stirrer speed set to 50  
[26:58] pH 10.38 -> 10.58  
[26:58] Using cautious pH adjust  
[26:58] Dispensed 0.000517 mL of Base (0.5 M KOH)  
[27:03] Stepping pH = 10.45  
[27:03] Dispensed 0.000611 mL of Base (0.5 M KOH)  
[27:08] Stepping pH = 10.52  
[27:08] Dispensed 0.000353 mL of Base (0.5 M KOH)  
[27:14] Stepping pH = 10.56  
[27:14] Dispensed 0.000165 mL of Base (0.5 M KOH)  
[27:19] Stepping pH = 10.58  
[27:34] Stirrer speed set to 0  
[27:44] Datapoint id 22 collected  
[27:44] Charge balance equation is out by -57.1%  
[27:44] Stirrer speed set to 50  
[27:49] pH 10.57 -> 10.77  
[27:49] Using cautious pH adjust  
[27:49] Dispensed 0.000611 mL of Base (0.5 M KOH)  
[27:54] Stepping pH = 10.64  
[27:54] Dispensed 0.000706 mL of Base (0.5 M KOH)  
[27:59] Stepping pH = 10.72  
[28:00] Dispensed 0.000400 mL of Base (0.5 M KOH)  
[28:05] Stepping pH = 10.75  
[28:05] Dispensed 0.000165 mL of Base (0.5 M KOH)  
[28:10] Stepping pH = 10.76  
[28:25] Stirrer speed set to 0  
[28:35] Datapoint id 23 collected  
[28:35] Charge balance equation is out by -50.4%  
[28:35] Stirrer speed set to 50  
[28:40] pH 10.75 -> 10.95  
[28:40] Using cautious pH adjust  
[28:40] Dispensed 0.000823 mL of Base (0.5 M KOH)  
[28:45] Stepping pH = 10.83  
[28:45] Dispensed 0.000941 mL of Base (0.5 M KOH)  
[28:50] Stepping pH = 10.90  
[28:51] Dispensed 0.000588 mL of Base (0.5 M KOH)  
[28:56] Stepping pH = 10.94  
[28:56] Dispensed 0.000212 mL of Base (0.5 M KOH)  
[29:01] Stepping pH = 10.94  
[29:16] Stirrer speed set to 0  
[29:26] Datapoint id 24 collected  
[29:26] Charge balance equation is out by -55.0%  
[29:26] Stirrer speed set to 50  
[29:31] pH 10.94 -> 11.14



Sample name: **M16\_octanol**  
Assay name: **pH-metric high logP**  
Assay ID: **18C-01007**  
Filename: **C:\Sirius\_T3\Mehtap\20180228\_exp28\_logP\_T3-2\18C-01007\_M16\_octanol\_pH-metric high logP.t3r**

Experiment start time: **3/1/2018 9:25:34 AM**  
Analyst: **Pion**  
Instrument ID: **T312060**

## Experiment Log (continued)

[29:31] Using cautious pH adjust  
[29:31] Dispensed 0.001199 mL of Base (0.5 M KOH)  
[29:36] Stepping pH = 11.01  
[29:36] Dispensed 0.001458 mL of Base (0.5 M KOH)  
[29:42] Stepping pH = 11.09  
[29:42] Dispensed 0.000706 mL of Base (0.5 M KOH)  
[29:47] Stepping pH = 11.13  
[29:47] Dispensed 0.000188 mL of Base (0.5 M KOH)  
[29:52] Stepping pH = 11.14  
[30:07] Stirrer speed set to 0  
[30:17] Datapoint id 25 collected  
[30:17] Charge balance equation is out by -48.0%  
[30:17] Stirrer speed set to 50  
[30:22] pH 11.13 -> 11.33  
[30:22] Using cautious pH adjust  
[30:22] Dispensed 0.001787 mL of Base (0.5 M KOH)  
[30:27] Stepping pH = 11.22  
[30:28] Dispensed 0.001552 mL of Base (0.5 M KOH)  
[30:33] Stepping pH = 11.30  
[30:33] Dispensed 0.000611 mL of Base (0.5 M KOH)  
[30:38] Stepping pH = 11.32  
[30:53] Stirrer speed set to 0  
[31:03] Datapoint id 26 collected  
[31:03] Charge balance equation is out by -10.0%  
[31:03] Stirrer speed set to 50  
[31:08] pH 11.32 -> 11.52  
[31:08] Using charge balance adjust  
[31:08] Dispensed 0.005503 mL of Base (0.5 M KOH)  
[31:29] Stirrer speed set to 0  
[31:39] Datapoint id 27 collected  
[31:39] Charge balance equation is out by -14.2%  
[31:39] Stirrer speed set to 50  
[31:44] pH 11.49 -> 11.69  
[31:44] Using charge balance adjust  
[31:44] Dispensed 0.008278 mL of Base (0.5 M KOH)  
[32:04] Stirrer speed set to 0  
[32:14] Datapoint id 28 collected  
[32:14] Charge balance equation is out by -7.1%  
[32:14] Stirrer speed set to 50  
[32:19] pH 11.68 -> 11.88  
[32:19] Using charge balance adjust  
[32:20] Dispensed 0.013006 mL of Base (0.5 M KOH)  
[32:40] Stirrer speed set to 0  
[32:50] Datapoint id 29 collected  
[32:50] Charge balance equation is out by -8.7%  
[32:50] Stirrer speed set to 50  
[32:55] pH 11.87 -> 12.05  
[32:55] Using charge balance adjust  
[32:56] Dispensed 0.017803 mL of Base (0.5 M KOH)  
[33:16] Stirrer speed set to 0  
[33:26] Datapoint id 30 collected  
[33:26] Charge balance equation is out by -21.5%  
[33:26] Titration 2 of 3  
[33:26] Adding initial titrants  
[33:26] Automatically add 0.10000 mL of Octanol  
[33:28] Dispensed 0.100000 mL of Octanol  
[33:28] Stirrer speed set to 10  
[33:29] Stirrer speed set to 55  
[33:29] Iterative adjust 12.04 -> 2.00

Sample name: **M16\_octanol**  
Assay name: **pH-metric high logP**  
Assay ID: **18C-01007**  
Filename: **C:\Sirius\_T3\Mehtap\20180228\_exp28\_logP\_T3-2\18C-01007\_M16\_octanol\_pH-metric high logP.t3r**

Experiment start time: **3/1/2018 9:25:34 AM**  
Analyst: **Pion**  
Instrument ID: **T312060**

## Experiment Log (continued)

[33:29] pH 12.04 -> 2.00  
[33:32] Dispensed 0.100000 mL of Acid (0.5 M HCl)  
[33:37] pH 2.26 -> 2.00  
[33:38] Dispensed 0.022437 mL of Acid (0.5 M HCl)  
[33:43] pH 2.02 -> 2.00  
[33:43] Dispensed 0.002140 mL of Acid (0.5 M HCl)  
[34:33] Stirrer speed set to 0  
[34:43] Datapoint id 31 collected  
[34:43] Stirrer speed set to 55  
[34:48] pH 1.96 -> 2.16  
[34:48] Using cautious pH adjust  
[34:49] Dispensed 0.010113 mL of Base (0.5 M KOH)  
[34:54] Stepping pH = 2.06  
[34:54] Dispensed 0.006703 mL of Base (0.5 M KOH)  
[34:59] Stepping pH = 2.13  
[34:59] Dispensed 0.002070 mL of Base (0.5 M KOH)  
[35:04] Stepping pH = 2.16  
[35:19] Stirrer speed set to 0  
[35:30] Datapoint id 32 collected  
[35:30] Charge balance equation is out by 6.7%  
[35:30] Stirrer speed set to 55  
[35:35] pH 2.16 -> 2.36  
[35:35] Using charge balance adjust  
[35:35] Dispensed 0.012629 mL of Base (0.5 M KOH)  
[35:55] Stirrer speed set to 0  
[36:05] Datapoint id 33 collected  
[36:05] Charge balance equation is out by 11.2%  
[36:05] Stirrer speed set to 55  
[36:10] pH 2.39 -> 2.59  
[36:10] Using charge balance adjust  
[36:11] Dispensed 0.007479 mL of Base (0.5 M KOH)  
[36:31] Stirrer speed set to 0  
[36:41] Datapoint id 34 collected  
[36:41] Charge balance equation is out by -11.6%  
[36:41] Stirrer speed set to 55  
[36:46] pH 2.57 -> 2.77  
[36:46] Using charge balance adjust  
[36:46] Dispensed 0.004986 mL of Base (0.5 M KOH)  
[37:06] Stirrer speed set to 0  
[37:16] Datapoint id 35 collected  
[37:16] Charge balance equation is out by -15.2%  
[37:16] Stirrer speed set to 55  
[37:21] pH 2.75 -> 2.95  
[37:21] Using cautious pH adjust  
[37:22] Dispensed 0.001740 mL of Base (0.5 M KOH)  
[37:27] Stepping pH = 2.82  
[37:27] Dispensed 0.001740 mL of Base (0.5 M KOH)  
[37:32] Stepping pH = 2.91  
[37:32] Dispensed 0.000494 mL of Base (0.5 M KOH)  
[37:37] Stepping pH = 2.94  
[37:52] Stirrer speed set to 0  
[38:03] Datapoint id 36 collected  
[38:03] Charge balance equation is out by -14.7%  
[38:03] Stirrer speed set to 55  
[38:08] pH 2.94 -> 3.14  
[38:08] Using charge balance adjust  
[38:08] Dispensed 0.002399 mL of Base (0.5 M KOH)  
[38:28] Stirrer speed set to 0  
[38:38] Datapoint id 37 collected



Sample name: **M16\_octanol**  
Assay name: **pH-metric high logP**  
Assay ID: **18C-01007**  
Filename: **C:\Sirius\_T3\Mehtap\20180228\_exp28\_logP\_T3-2\18C-01007\_M16\_octanol\_pH-metric high logP.t3r**

Experiment start time: **3/1/2018 9:25:34 AM**  
Analyst: **Pion**  
Instrument ID: **T312060**

## Experiment Log (continued)

[38:38] Charge balance equation is out by -22.9%  
[38:38] Stirrer speed set to 55  
[38:43] pH 3.10 -> 3.30  
[38:43] Using cautious pH adjust  
[38:44] Dispensed 0.000941 mL of Base (0.5 M KOH)  
[38:49] Stepping pH = 3.17  
[38:49] Dispensed 0.001105 mL of Base (0.5 M KOH)  
[38:54] Stepping pH = 3.25  
[38:54] Dispensed 0.000611 mL of Base (0.5 M KOH)  
[38:59] Stepping pH = 3.29  
[38:59] Dispensed 0.000141 mL of Base (0.5 M KOH)  
[39:04] Stepping pH = 3.30  
[39:19] Stirrer speed set to 0  
[39:29] Datapoint id 38 collected  
[39:29] Charge balance equation is out by -46.9%  
[39:29] Stirrer speed set to 55  
[39:34] pH 3.30 -> 3.50  
[39:34] Using cautious pH adjust  
[39:35] Dispensed 0.000800 mL of Base (0.5 M KOH)  
[39:40] Stepping pH = 3.38  
[39:40] Dispensed 0.000776 mL of Base (0.5 M KOH)  
[39:45] Stepping pH = 3.46  
[39:45] Dispensed 0.000282 mL of Base (0.5 M KOH)  
[39:50] Stepping pH = 3.50  
[40:05] Stirrer speed set to 0  
[40:16] Datapoint id 39 collected  
[40:16] Charge balance equation is out by -15.2%  
[40:16] Stirrer speed set to 55  
[40:21] pH 3.50 -> 3.70  
[40:21] Using cautious pH adjust  
[40:21] Dispensed 0.000776 mL of Base (0.5 M KOH)  
[40:26] Stepping pH = 3.61  
[40:26] Dispensed 0.000470 mL of Base (0.5 M KOH)  
[40:31] Stepping pH = 3.69  
[40:46] Stirrer speed set to 0  
[40:56] Datapoint id 40 collected  
[40:56] Charge balance equation is out by 19.5%  
[40:56] Stirrer speed set to 55  
[41:01] pH 3.69 -> 3.89  
[41:01] Using cautious pH adjust  
[41:02] Dispensed 0.000823 mL of Base (0.5 M KOH)  
[41:07] Stepping pH = 3.88  
[41:07] Dispensed 0.000047 mL of Base (0.5 M KOH)  
[41:12] Stepping pH = 3.88  
[41:12] Dispensed 0.000282 mL of Base (0.5 M KOH)  
[41:17] Stepping pH = 3.96  
[41:32] Stirrer speed set to 0  
[41:42] Datapoint id 41 collected  
[41:42] Charge balance equation is out by 29.0%  
[41:42] Stirrer speed set to 55  
[41:47] pH 3.97 -> 4.17  
[41:47] Using cautious pH adjust  
[41:47] Dispensed 0.000941 mL of Base (0.5 M KOH)  
[41:52] Stepping pH = 4.46  
[42:07] Stirrer speed set to 0  
[42:18] Datapoint id 42 collected  
[42:18] Charge balance equation is out by 50.0%  
[42:18] Stirrer speed set to 55  
[42:23] pH 4.46 -> 4.66

Sample name: **M16\_octanol**  
Assay name: **pH-metric high logP**  
Assay ID: **18C-01007**  
Filename: **C:\Sirius\_T3\Mehtap\20180228\_exp28\_logP\_T3-2\18C-01007\_M16\_octanol\_pH-metric high logP.t3r**

Experiment start time: **3/1/2018 9:25:34 AM**  
Analyst: **Pion**  
Instrument ID: **T312060**

## Experiment Log (continued)

[42:23] Using cautious pH adjust  
[42:23] Dispensed 0.000870 mL of Base (0.5 M KOH)  
[42:28] Stepping pH = 7.47  
[42:43] Stirrer speed set to 0  
[43:43] Datapoint id 43 collected  
[43:43] Charge balance equation is out by 50.0%  
[43:43] Stirrer speed set to 55  
[43:48] pH 7.65 -> 7.85  
[43:48] Using cautious pH adjust  
[43:49] Dispensed 0.000071 mL of Base (0.5 M KOH)  
[43:54] Stepping pH = 7.58  
[43:54] Dispensed 0.000400 mL of Base (0.5 M KOH)  
[43:59] Stepping pH = 9.04  
[44:14] Stirrer speed set to 0  
[44:30] Datapoint id 44 collected  
[44:30] Charge balance equation is out by -270.4%  
[44:30] Stirrer speed set to 55  
[44:35] pH 9.00 -> 9.20  
[44:35] Using cautious pH adjust  
[44:35] Dispensed 0.000729 mL of Base (0.5 M KOH)  
[44:40] Stepping pH = 9.52  
[44:55] Stirrer speed set to 0  
[45:07] Datapoint id 45 collected  
[45:07] Charge balance equation is out by 50.0%  
[45:07] Stirrer speed set to 55  
[45:12] pH 9.51 -> 9.71  
[45:12] Using cautious pH adjust  
[45:12] Dispensed 0.000964 mL of Base (0.5 M KOH)  
[45:17] Stepping pH = 9.88  
[45:32] Stirrer speed set to 0  
[45:42] Datapoint id 46 collected  
[45:42] Charge balance equation is out by 50.0%  
[45:42] Stirrer speed set to 55  
[45:47] pH 9.88 -> 10.08  
[45:47] Using cautious pH adjust  
[45:48] Dispensed 0.000847 mL of Base (0.5 M KOH)  
[45:53] Stepping pH = 10.05  
[45:53] Dispensed 0.000118 mL of Base (0.5 M KOH)  
[45:58] Stepping pH = 10.06  
[45:58] Dispensed 0.000165 mL of Base (0.5 M KOH)  
[46:03] Stepping pH = 10.08  
[46:18] Stirrer speed set to 0  
[46:28] Datapoint id 47 collected  
[46:28] Charge balance equation is out by 32.6%  
[46:28] Stirrer speed set to 55  
[46:33] pH 10.08 -> 10.28  
[46:33] Using cautious pH adjust  
[46:33] Dispensed 0.000753 mL of Base (0.5 M KOH)  
[46:38] Stepping pH = 10.22  
[46:39] Dispensed 0.000259 mL of Base (0.5 M KOH)  
[46:44] Stepping pH = 10.25  
[46:44] Dispensed 0.000141 mL of Base (0.5 M KOH)  
[46:49] Stepping pH = 10.27  
[47:04] Stirrer speed set to 0  
[47:14] Datapoint id 48 collected  
[47:14] Charge balance equation is out by 22.5%  
[47:14] Stirrer speed set to 55  
[47:19] pH 10.26 -> 10.46  
[47:19] Using cautious pH adjust

Sample name: **M16\_octanol**  
Assay name: **pH-metric high logP**  
Assay ID: **18C-01007**  
Filename: **C:\Sirius\_T3\Mehtap\20180228\_exp28\_logP\_T3-2\18C-01007\_M16\_octanol\_pH-metric high logP.t3r**

Experiment start time: **3/1/2018 9:25:34 AM**  
Analyst: **Pion**  
Instrument ID: **T312060**

## Experiment Log (continued)

[47:19] Dispensed 0.000706 mL of Base (0.5 M KOH)  
[47:24] Stepping pH = 10.37  
[47:24] Dispensed 0.000423 mL of Base (0.5 M KOH)  
[47:29] Stepping pH = 10.43  
[47:30] Dispensed 0.000235 mL of Base (0.5 M KOH)  
[47:35] Stepping pH = 10.45  
[47:35] Dispensed 0.000071 mL of Base (0.5 M KOH)  
[47:40] Stepping pH = 10.45  
[47:55] Stirrer speed set to 0  
[48:05] Datapoint id 49 collected  
[48:05] Charge balance equation is out by -1.7%  
[48:05] Stirrer speed set to 55  
[48:10] pH 10.45 -> 10.65  
[48:10] Using charge balance adjust  
[48:10] Dispensed 0.001458 mL of Base (0.5 M KOH)  
[48:30] Stirrer speed set to 0  
[48:40] Datapoint id 50 collected  
[48:40] Charge balance equation is out by -9.7%  
[48:40] Stirrer speed set to 55  
[48:46] pH 10.63 -> 10.83  
[48:46] Using charge balance adjust  
[48:46] Dispensed 0.001717 mL of Base (0.5 M KOH)  
[49:06] Stirrer speed set to 0  
[49:16] Datapoint id 51 collected  
[49:16] Charge balance equation is out by -26.7%  
[49:16] Stirrer speed set to 55  
[49:21] pH 10.78 -> 10.98  
[49:21] Using cautious pH adjust  
[49:21] Dispensed 0.001058 mL of Base (0.5 M KOH)  
[49:26] Stepping pH = 10.85  
[49:26] Dispensed 0.001199 mL of Base (0.5 M KOH)  
[49:31] Stepping pH = 10.92  
[49:32] Dispensed 0.000753 mL of Base (0.5 M KOH)  
[49:37] Stepping pH = 10.96  
[49:37] Dispensed 0.000282 mL of Base (0.5 M KOH)  
[49:42] Stepping pH = 10.97  
[49:57] Stirrer speed set to 0  
[50:07] Datapoint id 52 collected  
[50:07] Charge balance equation is out by -54.7%  
[50:07] Stirrer speed set to 55  
[50:12] pH 10.97 -> 11.17  
[50:12] Using cautious pH adjust  
[50:12] Dispensed 0.001529 mL of Base (0.5 M KOH)  
[50:17] Stepping pH = 11.05  
[50:18] Dispensed 0.001646 mL of Base (0.5 M KOH)  
[50:23] Stepping pH = 11.13  
[50:23] Dispensed 0.000870 mL of Base (0.5 M KOH)  
[50:28] Stepping pH = 11.16  
[50:43] Stirrer speed set to 0  
[50:53] Datapoint id 53 collected  
[50:53] Charge balance equation is out by -31.7%  
[50:53] Stirrer speed set to 55  
[50:58] pH 11.16 -> 11.36  
[50:58] Using cautious pH adjust  
[50:58] Dispensed 0.002258 mL of Base (0.5 M KOH)  
[51:03] Stepping pH = 11.25  
[51:03] Dispensed 0.001929 mL of Base (0.5 M KOH)  
[51:09] Stepping pH = 11.32  
[51:09] Dispensed 0.001152 mL of Base (0.5 M KOH)

Sample name: **M16\_octanol**  
 Assay name: **pH-metric high logP**  
 Assay ID: **18C-01007**  
 Filename: **C:\Sirius\_T3\Mehtap\20180228\_exp28\_logP\_T3-2\18C-01007\_M16\_octanol\_pH-metric high logP.t3r**

Experiment start time: **3/1/2018 9:25:34 AM**  
 Analyst: **Pion**  
 Instrument ID: **T312060**

## Experiment Log (continued)

[51:14] Stepping pH = 11.35  
 [51:14] Dispensed 0.000329 mL of Base (0.5 M KOH)  
 [51:19] Stepping pH = 11.36  
 [51:34] Stirrer speed set to 0  
 [51:44] Datapoint id 54 collected  
 [51:44] Charge balance equation is out by -25.3%  
 [51:44] Stirrer speed set to 55  
 [51:49] pH 11.35 -> 11.55  
 [51:49] Using cautious pH adjust  
 [51:49] Dispensed 0.003504 mL of Base (0.5 M KOH)  
 [51:54] Stepping pH = 11.45  
 [51:55] Dispensed 0.002987 mL of Base (0.5 M KOH)  
 [52:00] Stepping pH = 11.52  
 [52:00] Dispensed 0.001176 mL of Base (0.5 M KOH)  
 [52:05] Stepping pH = 11.55  
 [52:20] Stirrer speed set to 0  
 [52:30] Datapoint id 55 collected  
 [52:30] Charge balance equation is out by -9.2%  
 [52:30] Stirrer speed set to 55  
 [52:35] pH 11.55 -> 11.75  
 [52:35] Using charge balance adjust  
 [52:36] Dispensed 0.011007 mL of Base (0.5 M KOH)  
 [52:56] Stirrer speed set to 0  
 [53:06] Datapoint id 56 collected  
 [53:06] Charge balance equation is out by -12.5%  
 [53:06] Stirrer speed set to 55  
 [53:11] pH 11.73 -> 11.93  
 [53:11] Using charge balance adjust  
 [53:12] Dispensed 0.016769 mL of Base (0.5 M KOH)  
 [53:32] Stirrer speed set to 0  
 [53:42] Datapoint id 57 collected  
 [53:42] Charge balance equation is out by -8.0%  
 [53:42] Stirrer speed set to 55  
 [53:47] pH 11.92 -> 12.05  
 [53:47] Using charge balance adjust  
 [53:48] Dispensed 0.016322 mL of Base (0.5 M KOH)  
 [54:08] Stirrer speed set to 0  
 [54:18] Datapoint id 58 collected  
 [54:18] Charge balance equation is out by -42.2%  
 [54:18] Titration 3 of 3  
 [54:18] Adding initial titrants  
 [54:18] Automatically add 0.30000 mL of Octanol  
 [54:25] Dispensed 0.300000 mL of Octanol  
 [54:25] Stirrer speed set to 10  
 [54:26] Stirrer speed set to 60  
 [54:26] Iterative adjust 12.04 -> 2.00  
 [54:26] pH 12.04 -> 2.00  
 [54:29] Dispensed 0.100000 mL of Acid (0.5 M HCl)  
 [54:34] pH 2.44 -> 2.00  
 [54:35] Dispensed 0.035842 mL of Acid (0.5 M HCl)  
 [54:40] pH 2.03 -> 2.00  
 [54:40] Dispensed 0.003881 mL of Acid (0.5 M HCl)  
 [55:30] Stirrer speed set to 0  
 [55:41] Datapoint id 59 collected  
 [55:41] Stirrer speed set to 60  
 [55:46] pH 1.97 -> 2.17  
 [55:46] Using cautious pH adjust  
 [55:46] Dispensed 0.011477 mL of Base (0.5 M KOH)  
 [55:51] Stepping pH = 2.05

Sample name: **M16\_octanol**  
Assay name: **pH-metric high logP**  
Assay ID: **18C-01007**  
Filename: **C:\Sirius\_T3\Mehtap\20180228\_exp28\_logP\_T3-2\18C-01007\_M16\_octanol\_pH-metric high logP.t3r**

Experiment start time: **3/1/2018 9:25:34 AM**  
Analyst: **Pion**  
Instrument ID: **T312060**

## Experiment Log (continued)

[55:52] Dispensed 0.008937 mL of Base (0.5 M KOH)  
[55:57] Stepping pH = 2.14  
[55:57] Dispensed 0.001834 mL of Base (0.5 M KOH)  
[56:02] Stepping pH = 2.17  
[56:17] Stirrer speed set to 0  
[56:28] Datapoint id 60 collected  
[56:28] Charge balance equation is out by 3.1%  
[56:28] Stirrer speed set to 60  
[56:33] pH 2.17 -> 2.37  
[56:33] Using charge balance adjust  
[56:33] Dispensed 0.014276 mL of Base (0.5 M KOH)  
[56:53] Stirrer speed set to 0  
[57:03] Datapoint id 61 collected  
[57:03] Charge balance equation is out by -3.3%  
[57:03] Stirrer speed set to 60  
[57:08] pH 2.37 -> 2.57  
[57:08] Using charge balance adjust  
[57:09] Dispensed 0.009149 mL of Base (0.5 M KOH)  
[57:29] Stirrer speed set to 0  
[57:39] Datapoint id 62 collected  
[57:39] Charge balance equation is out by -1.3%  
[57:39] Stirrer speed set to 60  
[57:44] pH 2.57 -> 2.77  
[57:44] Using charge balance adjust  
[57:44] Dispensed 0.005950 mL of Base (0.5 M KOH)  
[58:05] Stirrer speed set to 0  
[58:15] Datapoint id 63 collected  
[58:15] Charge balance equation is out by -16.5%  
[58:15] Stirrer speed set to 60  
[58:20] pH 2.74 -> 2.94  
[58:20] Using cautious pH adjust  
[58:20] Dispensed 0.002117 mL of Base (0.5 M KOH)  
[58:25] Stepping pH = 2.82  
[58:25] Dispensed 0.001952 mL of Base (0.5 M KOH)  
[58:30] Stepping pH = 2.91  
[58:30] Dispensed 0.000541 mL of Base (0.5 M KOH)  
[58:35] Stepping pH = 2.94  
[58:50] Stirrer speed set to 0  
[59:00] Datapoint id 64 collected  
[59:00] Charge balance equation is out by -8.5%  
[59:00] Stirrer speed set to 60  
[59:06] pH 2.94 -> 3.14  
[59:06] Using charge balance adjust  
[59:06] Dispensed 0.003057 mL of Base (0.5 M KOH)  
[59:26] Stirrer speed set to 0  
[59:36] Datapoint id 65 collected  
[59:36] Charge balance equation is out by 2.6%  
[59:36] Stirrer speed set to 60  
[59:41] pH 3.15 -> 3.35  
[59:41] Using charge balance adjust  
[59:41] Dispensed 0.002446 mL of Base (0.5 M KOH)  
[1:00:01] Stirrer speed set to 0  
[1:00:11] Datapoint id 66 collected  
[1:00:11] Charge balance equation is out by 15.7%  
[1:00:11] Stirrer speed set to 60  
[1:00:17] pH 3.38 -> 3.58  
[1:00:17] Using cautious pH adjust  
[1:00:17] Dispensed 0.001105 mL of Base (0.5 M KOH)  
[1:00:22] Stepping pH = 3.54

Sample name: **M16\_octanol**  
Assay name: **pH-metric high logP**  
Assay ID: **18C-01007**  
Filename: **C:\Sirius\_T3\Mehtap\20180228\_exp28\_logP\_T3-2\18C-01007\_M16\_octanol\_pH-metric high logP.t3r**

Experiment start time: **3/1/2018 9:25:34 AM**  
Analyst: **Pion**  
Instrument ID: **T312060**

## Experiment Log (continued)

[1:00:22] Dispensed 0.000212 mL of Base (0.5 M KOH)  
[1:00:27] Stepping pH = 3.58  
[1:00:42] Stirrer speed set to 0  
[1:00:52] Datapoint id 67 collected  
[1:00:52] Charge balance equation is out by 40.2%  
[1:00:52] Stirrer speed set to 60  
[1:00:57] pH 3.58 -> 3.78  
[1:00:57] Using cautious pH adjust  
[1:00:57] Dispensed 0.001082 mL of Base (0.5 M KOH)  
[1:01:02] Stepping pH = 3.88  
[1:01:18] Stirrer speed set to 0  
[1:01:28] Datapoint id 68 collected  
[1:01:28] Charge balance equation is out by 50.0%  
[1:01:28] Stirrer speed set to 60  
[1:01:33] pH 3.88 -> 4.08  
[1:01:33] Using cautious pH adjust  
[1:01:33] Dispensed 0.001035 mL of Base (0.5 M KOH)  
[1:01:38] Stepping pH = 4.71  
[1:01:53] Stirrer speed set to 0  
[1:02:05] Datapoint id 69 collected  
[1:02:05] Charge balance equation is out by 50.0%  
[1:02:05] Stirrer speed set to 60  
[1:02:10] pH 4.69 -> 4.89  
[1:02:10] Using cautious pH adjust  
[1:02:10] Dispensed 0.000447 mL of Base (0.5 M KOH)  
[1:02:15] Stepping pH = 6.55  
[1:02:30] Stirrer speed set to 0  
[1:03:22] Datapoint id 70 collected  
[1:03:22] Charge balance equation is out by 50.0%  
[1:03:22] Stirrer speed set to 60  
[1:03:27] pH 6.17 -> 6.37  
[1:03:27] Using cautious pH adjust  
[1:03:27] Dispensed 0.000047 mL of Base (0.5 M KOH)  
[1:03:32] Stepping pH = 6.09  
[1:03:32] Dispensed 0.000329 mL of Base (0.5 M KOH)  
[1:03:37] Stepping pH = 8.68  
[1:03:52] Stirrer speed set to 0  
[1:04:43] Datapoint id 71 collected  
[1:04:43] Charge balance equation is out by -318.8%  
[1:04:43] Stirrer speed set to 60  
[1:04:48] pH 8.44 -> 8.64  
[1:04:48] Using cautious pH adjust  
[1:04:48] Dispensed 0.000165 mL of Base (0.5 M KOH)  
[1:04:53] Stepping pH = 8.82  
[1:05:08] Stirrer speed set to 0  
[1:05:22] Datapoint id 72 collected  
[1:05:22] Charge balance equation is out by 50.0%  
[1:05:22] Stirrer speed set to 60  
[1:05:28] pH 8.77 -> 8.97  
[1:05:28] Using cautious pH adjust  
[1:05:28] Dispensed 0.000306 mL of Base (0.5 M KOH)  
[1:05:33] Stepping pH = 9.20  
[1:05:48] Stirrer speed set to 0  
[1:06:00] Datapoint id 73 collected  
[1:06:00] Charge balance equation is out by 50.0%  
[1:06:00] Stirrer speed set to 60  
[1:06:05] pH 9.18 -> 9.38  
[1:06:05] Using cautious pH adjust  
[1:06:05] Dispensed 0.000635 mL of Base (0.5 M KOH)



Sample name: **M16\_octanol**  
Assay name: **pH-metric high logP**  
Assay ID: **18C-01007**  
Filename: **C:\Sirius\_T3\Mehtap\20180228\_exp28\_logP\_T3-2\18C-01007\_M16\_octanol\_pH-metric high logP.t3r**

Experiment start time: **3/1/2018 9:25:34 AM**  
Analyst: **Pion**  
Instrument ID: **T312060**

## Experiment Log (continued)

[1:06:10] Stepping pH = 9.65  
[1:06:25] Stirrer speed set to 0  
[1:06:35] Datapoint id 74 collected  
[1:06:35] Charge balance equation is out by 50.0%  
[1:06:35] Stirrer speed set to 60  
[1:06:40] pH 9.64 -> 9.84  
[1:06:40] Using cautious pH adjust  
[1:06:41] Dispensed 0.000988 mL of Base (0.5 M KOH)  
[1:06:46] Stepping pH = 10.01  
[1:07:01] Stirrer speed set to 0  
[1:07:11] Datapoint id 75 collected  
[1:07:11] Charge balance equation is out by 50.0%  
[1:07:11] Stirrer speed set to 60  
[1:07:16] pH 10.00 -> 10.20  
[1:07:16] Using cautious pH adjust  
[1:07:16] Dispensed 0.001035 mL of Base (0.5 M KOH)  
[1:07:22] Stepping pH = 10.23  
[1:07:37] Stirrer speed set to 0  
[1:07:47] Datapoint id 76 collected  
[1:07:47] Charge balance equation is out by 50.0%  
[1:07:47] Stirrer speed set to 60  
[1:07:52] pH 10.22 -> 10.42  
[1:07:52] Using cautious pH adjust  
[1:07:52] Dispensed 0.001011 mL of Base (0.5 M KOH)  
[1:07:57] Stepping pH = 10.39  
[1:07:57] Dispensed 0.000212 mL of Base (0.5 M KOH)  
[1:08:02] Stepping pH = 10.40  
[1:08:02] Dispensed 0.000165 mL of Base (0.5 M KOH)  
[1:08:07] Stepping pH = 10.42  
[1:08:23] Stirrer speed set to 0  
[1:08:33] Datapoint id 77 collected  
[1:08:33] Charge balance equation is out by 31.5%  
[1:08:33] Stirrer speed set to 60  
[1:08:38] pH 10.42 -> 10.62  
[1:08:38] Using cautious pH adjust  
[1:08:38] Dispensed 0.001011 mL of Base (0.5 M KOH)  
[1:08:43] Stepping pH = 10.55  
[1:08:43] Dispensed 0.000376 mL of Base (0.5 M KOH)  
[1:08:48] Stepping pH = 10.59  
[1:08:48] Dispensed 0.000188 mL of Base (0.5 M KOH)  
[1:08:53] Stepping pH = 10.61  
[1:09:08] Stirrer speed set to 0  
[1:09:18] Datapoint id 78 collected  
[1:09:18] Charge balance equation is out by 21.6%  
[1:09:18] Stirrer speed set to 60  
[1:09:23] pH 10.60 -> 10.80  
[1:09:23] Using cautious pH adjust  
[1:09:24] Dispensed 0.001105 mL of Base (0.5 M KOH)  
[1:09:29] Stepping pH = 10.71  
[1:09:29] Dispensed 0.000729 mL of Base (0.5 M KOH)  
[1:09:34] Stepping pH = 10.77  
[1:09:34] Dispensed 0.000282 mL of Base (0.5 M KOH)  
[1:09:39] Stepping pH = 10.79  
[1:09:54] Stirrer speed set to 0  
[1:10:04] Datapoint id 79 collected  
[1:10:04] Charge balance equation is out by 5.1%  
[1:10:04] Stirrer speed set to 60  
[1:10:09] pH 10.78 -> 10.98  
[1:10:09] Using charge balance adjust

Sample name: **M16\_octanol**  
Assay name: **pH-metric high logP**  
Assay ID: **18C-01007**  
Filename: **C:\Sirius\_T3\Mehtap\20180228\_exp28\_logP\_T3-2\18C-01007\_M16\_octanol\_pH-metric high logP.t3r**

Experiment start time: **3/1/2018 9:25:34 AM**  
Analyst: **Pion**  
Instrument ID: **T312060**

## Experiment Log (continued)

[1:10:09] Dispensed 0.002705 mL of Base (0.5 M KOH)  
[1:10:30] Stirrer speed set to 0  
[1:10:40] Datapoint id 80 collected  
[1:10:40] Charge balance equation is out by -11.6%  
[1:10:40] Stirrer speed set to 60  
[1:10:45] pH 10.96 -> 11.16  
[1:10:45] Using charge balance adjust  
[1:10:45] Dispensed 0.003622 mL of Base (0.5 M KOH)  
[1:11:05] Stirrer speed set to 0  
[1:11:15] Datapoint id 81 collected  
[1:11:15] Charge balance equation is out by -20.9%  
[1:11:15] Stirrer speed set to 60  
[1:11:20] pH 11.12 -> 11.32  
[1:11:20] Using cautious pH adjust  
[1:11:21] Dispensed 0.002469 mL of Base (0.5 M KOH)  
[1:11:26] Stepping pH = 11.21  
[1:11:26] Dispensed 0.002140 mL of Base (0.5 M KOH)  
[1:11:31] Stepping pH = 11.29  
[1:11:31] Dispensed 0.000729 mL of Base (0.5 M KOH)  
[1:11:36] Stepping pH = 11.31  
[1:11:51] Stirrer speed set to 0  
[1:12:01] Datapoint id 82 collected  
[1:12:01] Charge balance equation is out by -7.8%  
[1:12:01] Stirrer speed set to 60  
[1:12:06] pH 11.31 -> 11.51  
[1:12:06] Using charge balance adjust  
[1:12:07] Dispensed 0.007385 mL of Base (0.5 M KOH)  
[1:12:27] Stirrer speed set to 0  
[1:12:37] Datapoint id 83 collected  
[1:12:37] Charge balance equation is out by -18.4%  
[1:12:37] Stirrer speed set to 60  
[1:12:42] pH 11.48 -> 11.68  
[1:12:42] Using cautious pH adjust  
[1:12:42] Dispensed 0.005386 mL of Base (0.5 M KOH)  
[1:12:47] Stepping pH = 11.57  
[1:12:47] Dispensed 0.004586 mL of Base (0.5 M KOH)  
[1:12:53] Stepping pH = 11.65  
[1:12:53] Dispensed 0.001787 mL of Base (0.5 M KOH)  
[1:12:58] Stepping pH = 11.67  
[1:13:13] Stirrer speed set to 0  
[1:13:23] Datapoint id 84 collected  
[1:13:23] Charge balance equation is out by -8.5%  
[1:13:23] Stirrer speed set to 60  
[1:13:28] pH 11.67 -> 11.87  
[1:13:28] Using charge balance adjust  
[1:13:29] Dispensed 0.017074 mL of Base (0.5 M KOH)  
[1:13:49] Stirrer speed set to 0  
[1:13:59] Datapoint id 85 collected  
[1:13:59] Charge balance equation is out by -11.5%  
[1:13:59] Stirrer speed set to 60  
[1:14:04] pH 11.85 -> 12.05  
[1:14:04] Using charge balance adjust  
[1:14:05] Dispensed 0.025823 mL of Base (0.5 M KOH)  
[1:14:25] Stirrer speed set to 0  
[1:14:35] Datapoint id 86 collected  
[1:14:35] Charge balance equation is out by -9.9%  
[1:14:35] Argon flow rate set to 0  
[1:14:39] Titrator arm moved over Titration position  
[1:15:00] The autoloader failed to pick at location "Sample position"
