# Supplementary material for: Octanol-water partition coefficient measurements for the SAMPL6 Blind Prediction Challenge
Source: bioRxiv or medRxiv preprint supplement (doi:10.1101/757393), 2019-12-02
Supplement: Supplementary file [file media-2.zip]

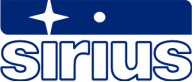

Sample name: **M13\_octanol** Experiment start time: **3/26/2018 4:16:35 PM**  
Assay name: **pH-metric high logP** Analyst: **Pion**  
Assay ID: **18C-26010** Instrument ID: **T312060**  
Filename: **C:\Sirius\_T3\Mehtap\20180327\_exp34\_logP\_T3-2\18C-26010\_M13\_octanol\_pH-metric high logP.t3r**

## pH-metric Result

logP (XH +) 0.09 ±0.08 (n=50)  
logP (neutral X) 2.99 ±0.03 (n=50)

### 18C-26010 Points 2 to 16

M13\_octanol concentration factor 1.006  
Carbonate 0.0000 mM  
Acidity error 2.38959 mM

### 18C-26010 Points 17 to 40

M13\_octanol concentration factor 0.639  
Carbonate 0.1054 mM  
Acidity error 2.15628 mM

### 18C-26010 Points 41 to 68

M13\_octanol concentration factor 0.745  
Carbonate 0.1125 mM  
Acidity error 2.15554 mM

## Warnings and errors

Errors None  
Warnings None

## Sample logD and percent species

| pH     | M13_octanol<br>logD | M13_octanol<br>M13_octanolH | M13_octanol<br>M13_octanol | M13_octanol<br>M13_octanolH* | M13_octanol<br>M13_octanol* | Comment    |
|--------|---------------------|-----------------------------|----------------------------|------------------------------|-----------------------------|------------|
| 1.000  | 0.09                | 44.67 %                     | 0.00 %                     | 54.60 %                      | 0.74 %                      | Stomach pH |
| 1.200  | 0.10                | 44.47 %                     | 0.00 %                     | 54.36 %                      | 1.17 %                      |            |
| 2.000  | 0.14                | 41.88 %                     | 0.01 %                     | 51.19 %                      | 6.93 %                      |            |
| 3.000  | 0.46                | 25.78 %                     | 0.04 %                     | 31.52 %                      | 42.65 %                     |            |
| 4.000  | 1.24                | 5.32 %                      | 0.09 %                     | 6.51 %                       | 88.08 %                     |            |
| 5.000  | 2.15                | 0.60 %                      | 0.10 %                     | 0.73 %                       | 98.57 %                     | Blood pH   |
| 6.000  | 2.79                | 0.06 %                      | 0.10 %                     | 0.07 %                       | 99.76 %                     |            |
| 6.500  | 2.91                | 0.02 %                      | 0.10 %                     | 0.02 %                       | 99.86 %                     |            |
| 7.000  | 2.96                | 0.01 %                      | 0.10 %                     | 0.01 %                       | 99.88 %                     |            |
| 7.400  | 2.98                | 0.00 %                      | 0.10 %                     | 0.00 %                       | 99.89 %                     |            |
| 8.000  | 2.99                | 0.00 %                      | 0.10 %                     | 0.00 %                       | 99.90 %                     |            |
| 9.000  | 2.99                | 0.00 %                      | 0.10 %                     | 0.00 %                       | 99.90 %                     |            |
| 10.000 | 2.99                | 0.00 %                      | 0.10 %                     | 0.00 %                       | 99.90 %                     |            |
| 11.000 | 2.99                | 0.00 %                      | 0.10 %                     | 0.00 %                       | 99.90 %                     |            |
| 12.000 | 2.99                | 0.00 %                      | 0.10 %                     | 0.00 %                       | 99.90 %                     |            |

Sample name: **M13\_octanol**  
 Assay name: **pH-metric high logP**  
 Assay ID: **18C-26010**  
 Filename: **C:\Sirius\_T3\Mehtap\20180327\_exp34\_logP\_T3-2\18C-26010\_M13\_octanol\_pH-metric high logP.t3r**

Experiment start time: **3/26/2018 4:16:35 PM**  
 Analyst: **Pion**  
 Instrument ID: **T312060**

## Graphs

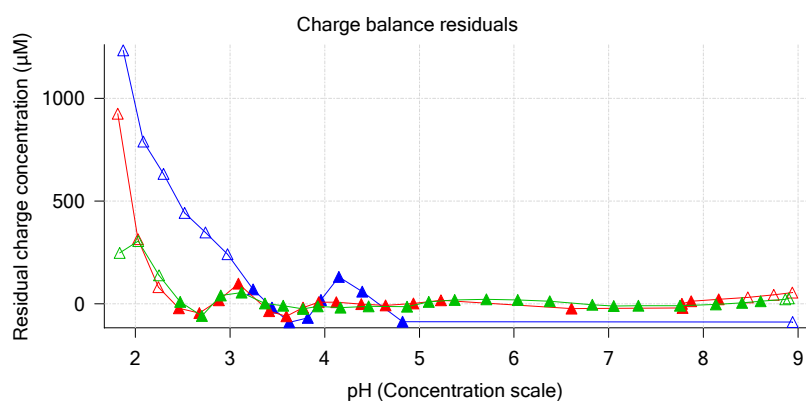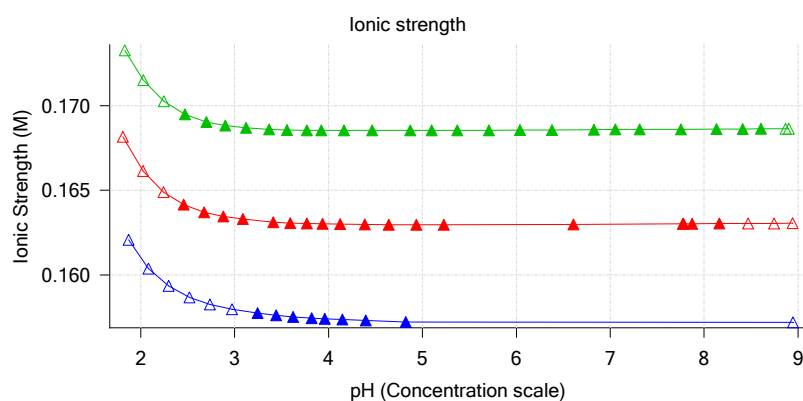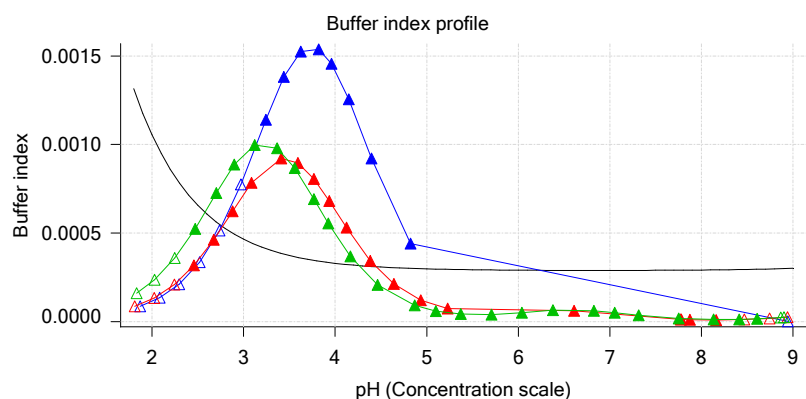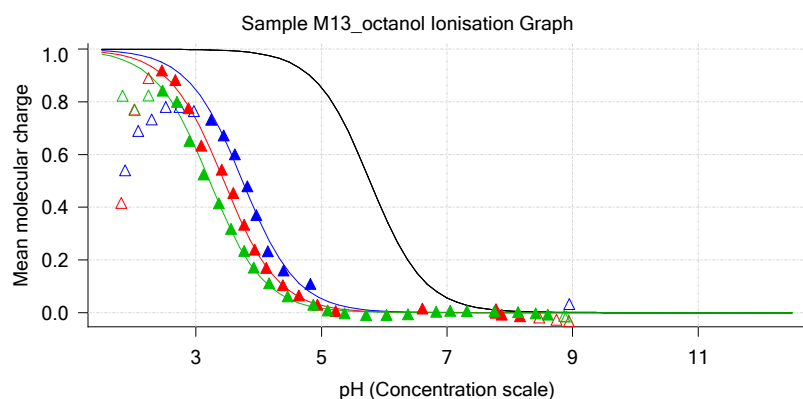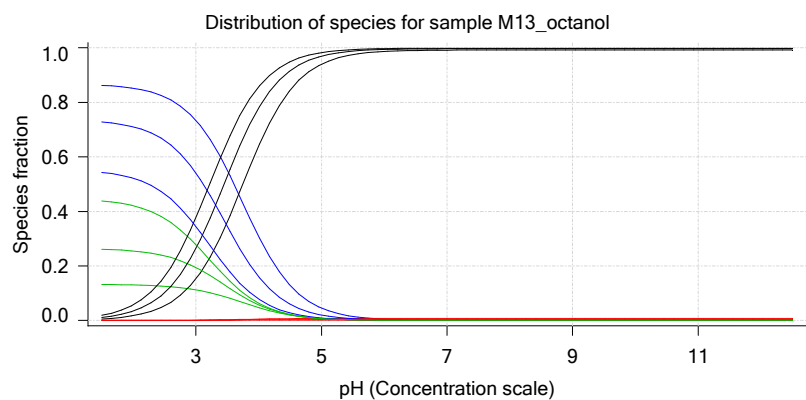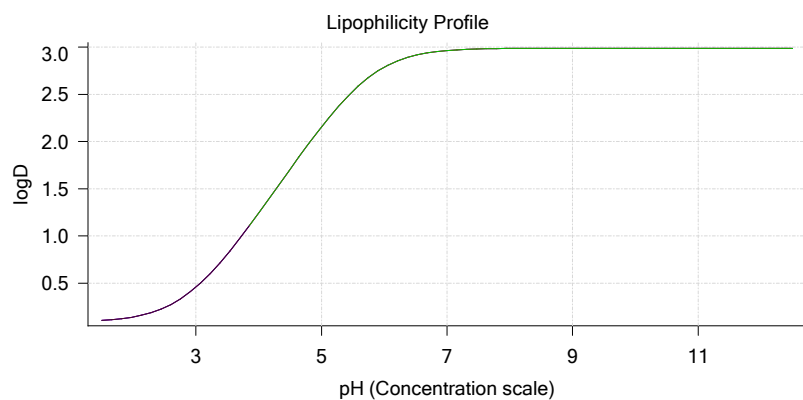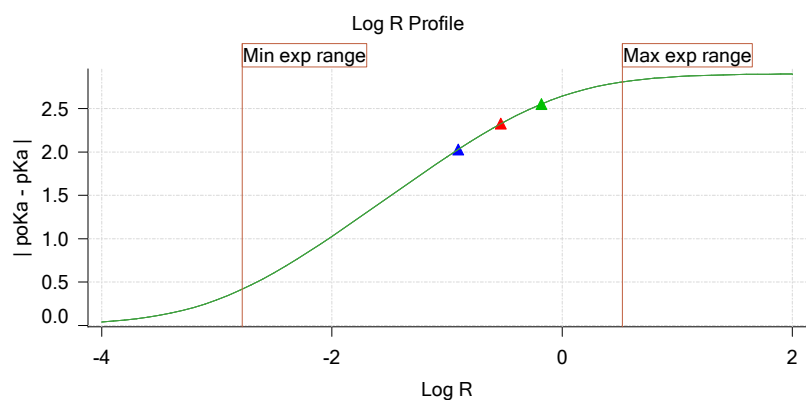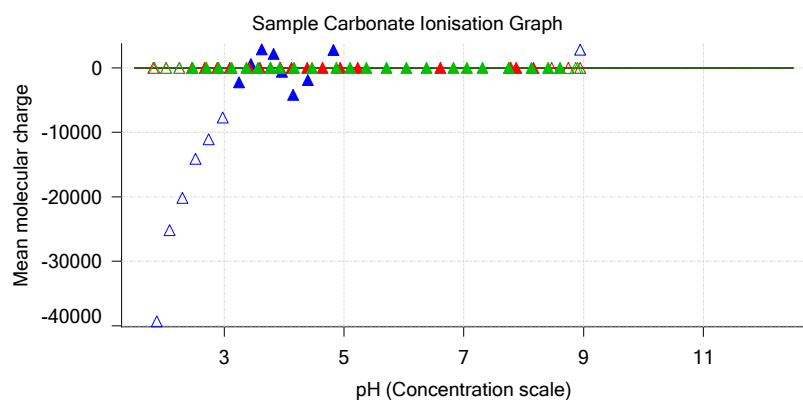

Sample name: **M13\_octanol**  
 Assay name: **pH-metric high logP**  
 Assay ID: **18C-26010**  
 Filename: **C:\Sirius\_T3\Mehtap\20180327\_exp34\_logP\_T3-2\18C-26010\_M13\_octanol\_pH-metric high logP.t3r**

Experiment start time: **3/26/2018 4:16:35 PM**  
 Analyst: **Pion**  
 Instrument ID: **T312060**

## Graphs (continued)

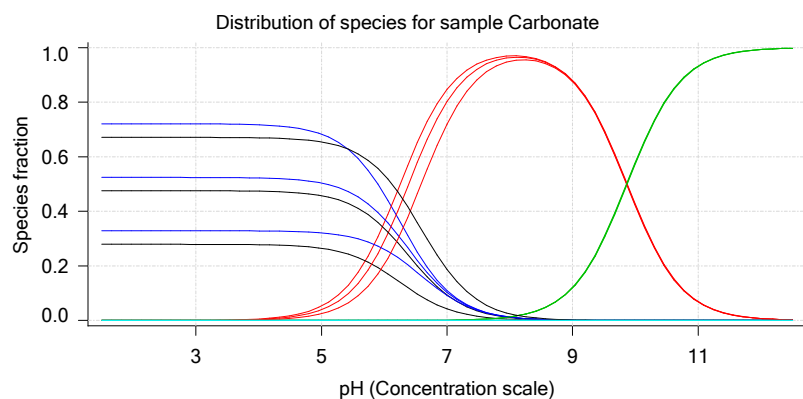

Sample name: **M13\_octanol**  
 Assay name: **pH-metric high logP**  
 Assay ID: **18C-26010**  
 Filename: **C:\Sirius\_T3\Mehtap\20180327\_exp34\_logP\_T3-2\18C-26010\_M13\_octanol\_pH-metric high logP.t3r**

Experiment start time: **3/26/2018 4:16:35 PM**  
 Analyst: **Pion**  
 Instrument ID: **T312060**

## pH-metric high logP Titration 1 of 3 18C-26010 Points 2 to 16

### Overall results

RMSD 0.079  
 Average ionic strength 0.158 M  
 Average temperature 24.9°C  
 Partition ratio 0.1253 : 1  
 Analyte concentration range 2374.9 µM to 2437.5 µM  
 Total points considered 8 of 15

### Warnings and errors

Errors None  
 Warnings One or more logP values out of range  
 Excessive acidity error present

### Four-Plus parameters

Alpha 0.122 3/26/2018 4:16:34 PM C:\Sirius\_T3\18C-26006\_Blank standardisation.t3r  
 S 0.9974 3/26/2018 4:16:34 PM C:\Sirius\_T3\18C-26006\_Blank standardisation.t3r  
 jH 1.1 3/26/2018 4:16:34 PM C:\Sirius\_T3\18C-26006\_Blank standardisation.t3r  
 jOH -0.5 3/26/2018 4:16:34 PM C:\Sirius\_T3\18C-26006\_Blank standardisation.t3r

### Titrants

0.50 M HCl 0.994478 3/26/2018 4:16:34 PM C:\Sirius\_T3\18C-26006\_Blank standardisation.t3r  
 0.50 M KOH 1.003190 3/26/2018 4:16:35 PM C:\Sirius\_T3\KOH18C23.t3r

### Sample

M13\_octanol concentration factor 1.006  
 Base pKa 1 5.77  
 logP (XH +) -4.56  
 logP (neutral X) 2.93

### Sample graphs

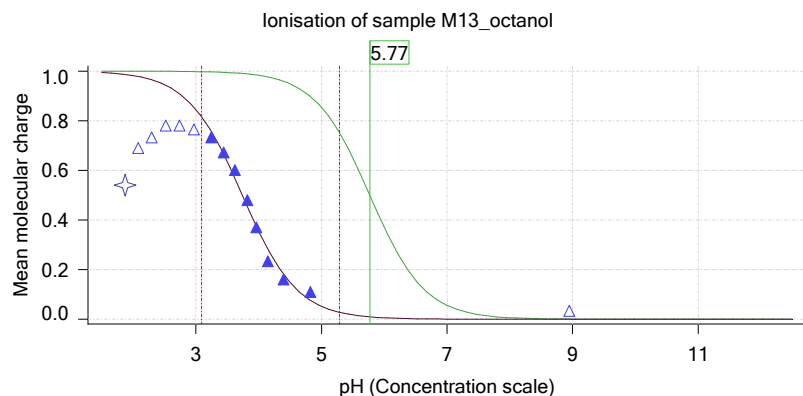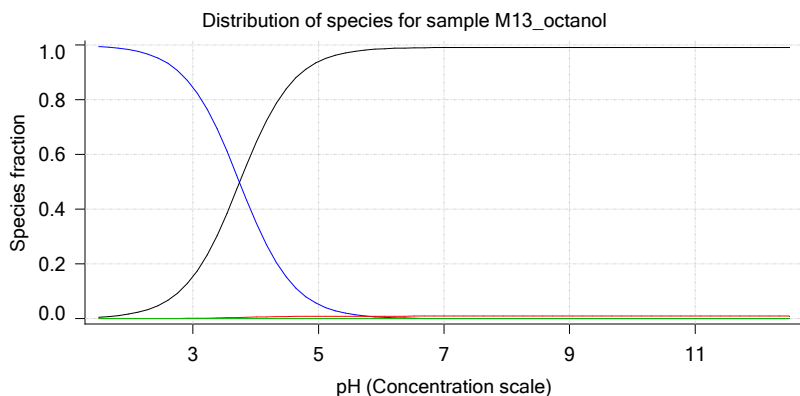

Sample name: **M13\_octanol**  
 Assay name: **pH-metric high logP**  
 Assay ID: **18C-26010**  
 Filename: **C:\Sirius\_T3\Mehtap\20180327\_exp34\_logP\_T3-2\18C-26010\_M13\_octanol\_pH-metric high logP.t3r**

Experiment start time: **3/26/2018 4:16:35 PM**  
 Analyst: **Pion**  
 Instrument ID: **T312060**

## Sample graphs (continued)

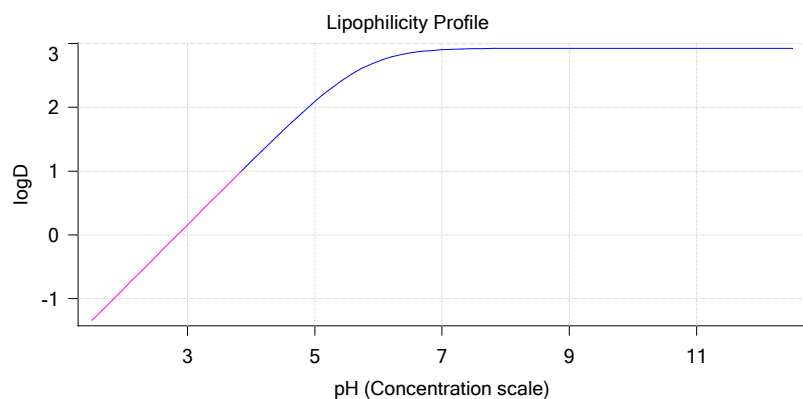

## Sample logD and percent species

| pH     | M13_octanol<br>logD | M13_octanol<br>M13_octanolH | M13_octanol<br>M13_octanol | M13_octanol<br>M13_octanolH* | M13_octanol<br>M13_octanol* | Comment    |
|--------|---------------------|-----------------------------|----------------------------|------------------------------|-----------------------------|------------|
| 1.000  | -1.84               | 99.82 %                     | 0.00 %                     | 0.00 %                       | 0.18 %                      | Stomach pH |
| 1.200  | -1.64               | 99.71 %                     | 0.00 %                     | 0.00 %                       | 0.28 %                      |            |
| 2.000  | -0.84               | 98.21 %                     | 0.02 %                     | 0.00 %                       | 1.77 %                      |            |
| 3.000  | 0.16                | 84.62 %                     | 0.14 %                     | 0.00 %                       | 15.23 %                     |            |
| 4.000  | 1.15                | 35.50 %                     | 0.60 %                     | 0.00 %                       | 63.90 %                     |            |
| 5.000  | 2.09                | 5.22 %                      | 0.89 %                     | 0.00 %                       | 93.90 %                     | Blood pH   |
| 6.000  | 2.73                | 0.55 %                      | 0.93 %                     | 0.00 %                       | 98.52 %                     |            |
| 6.500  | 2.85                | 0.17 %                      | 0.93 %                     | 0.00 %                       | 98.89 %                     |            |
| 7.000  | 2.90                | 0.05 %                      | 0.93 %                     | 0.00 %                       | 99.01 %                     |            |
| 7.400  | 2.92                | 0.02 %                      | 0.93 %                     | 0.00 %                       | 99.04 %                     |            |
| 8.000  | 2.92                | 0.01 %                      | 0.93 %                     | 0.00 %                       | 99.06 %                     |            |
| 9.000  | 2.93                | 0.00 %                      | 0.93 %                     | 0.00 %                       | 99.06 %                     |            |
| 10.000 | 2.93                | 0.00 %                      | 0.93 %                     | 0.00 %                       | 99.07 %                     |            |
| 11.000 | 2.93                | 0.00 %                      | 0.93 %                     | 0.00 %                       | 99.07 %                     |            |
| 12.000 | 2.93                | 0.00 %                      | 0.93 %                     | 0.00 %                       | 99.07 %                     |            |

## Carbonate and acidity

Carbonate 0.000 mM  
 Acidity error 2.390 mM

## Other graphs

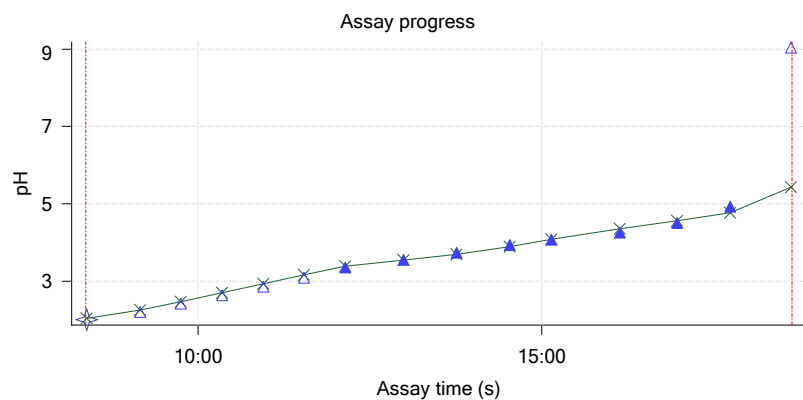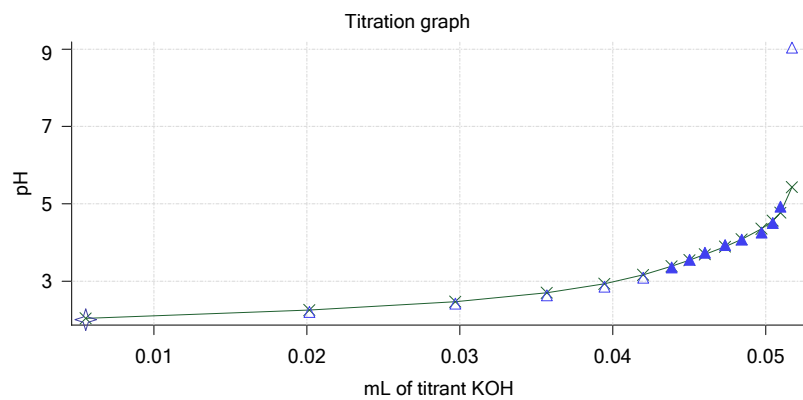

Sample name: **M13\_octanol**  
 Assay name: **pH-metric high logP**  
 Assay ID: **18C-26010**  
 Filename: **C:\Sirius\_T3\Mehtap\20180327\_exp34\_logP\_T3-2\18C-26010\_M13\_octanol\_pH-metric high logP.t3r**

Experiment start time: **3/26/2018 4:16:35 PM**  
 Analyst: **Pion**  
 Instrument ID: **T312060**

## Other graphs (continued)

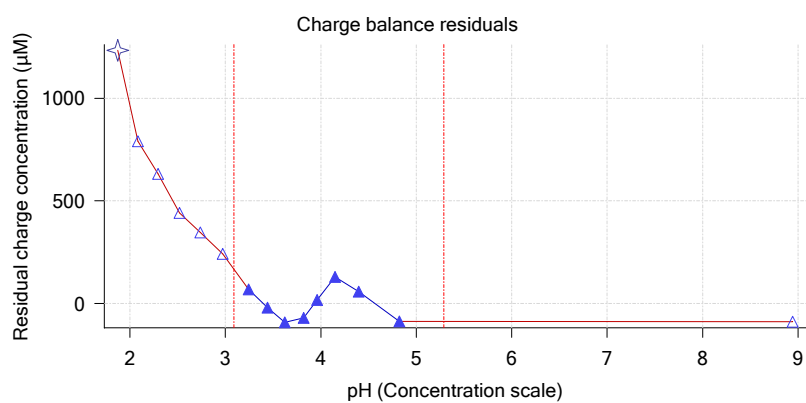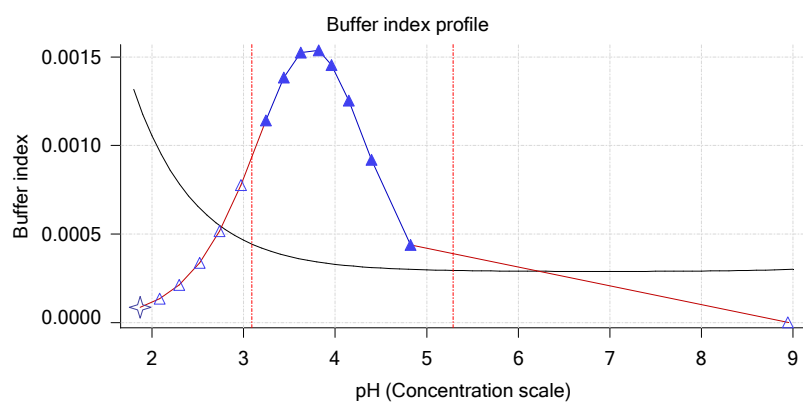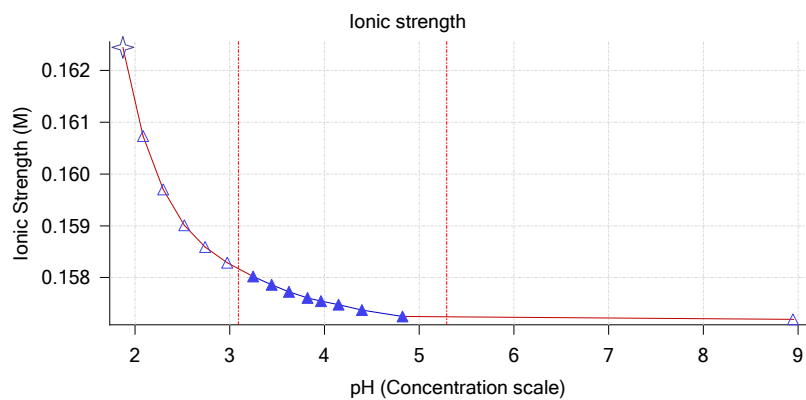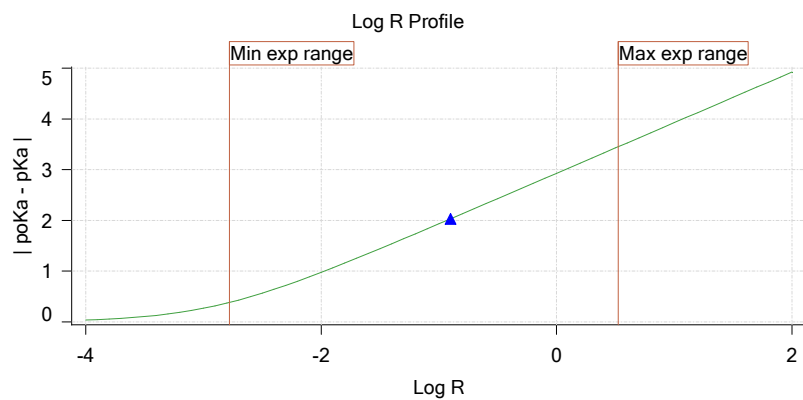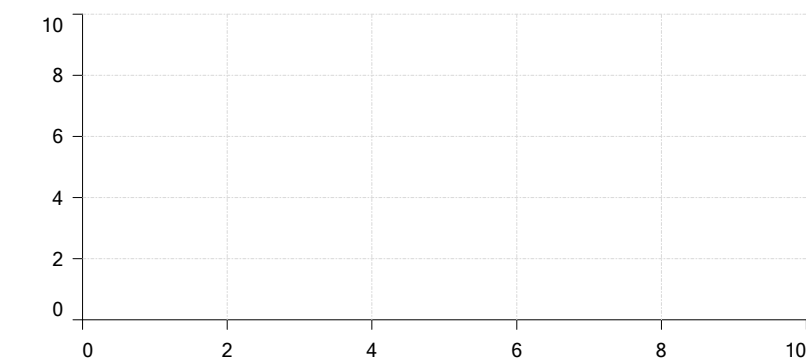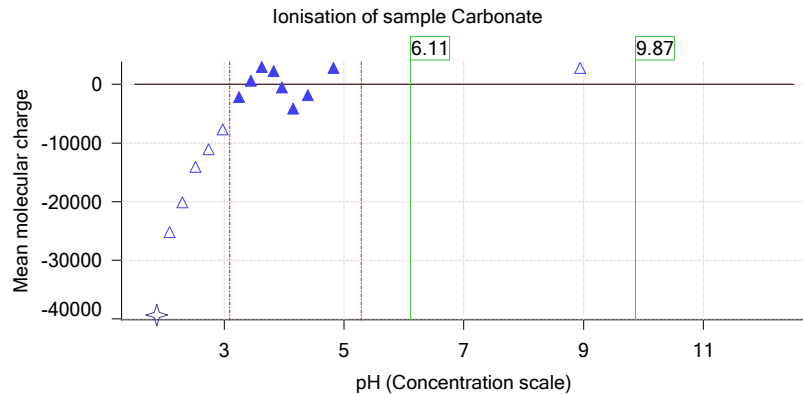

Sample name: **M13\_octanol**  
 Assay name: **pH-metric high logP**  
 Assay ID: **18C-26010**  
 Filename: **C:\Sirius\_T3\Mehtap\20180327\_exp34\_logP\_T3-2\18C-26010\_M13\_octanol\_pH-metric high logP.t3r**

Experiment start time: **3/26/2018 4:16:35 PM**  
 Analyst: **Pion**  
 Instrument ID: **T312060**

## pH-metric high logP Titration 2 of 3 18C-26010 Points 17 to 40

### Overall results

RMSD 0.567  
 Average ionic strength 0.163 M  
 Average temperature 25.0°C  
 Partition ratio 0.2937 : 1  
 Analyte concentration range 1935.6 µM to 1984.1 µM  
 Total points considered 18 of 24

### Warnings and errors

Errors None  
 Warnings Sample concentration factor out of range  
 One or more logP values out of range  
 Excessive acidity error present

### Four-Plus parameters

Alpha 0.122 3/26/2018 4:16:34 PM C:\Sirius\_T3\18C-26006\_Blank standardisation.t3r  
 S 0.9974 3/26/2018 4:16:34 PM C:\Sirius\_T3\18C-26006\_Blank standardisation.t3r  
 jH 1.1 3/26/2018 4:16:34 PM C:\Sirius\_T3\18C-26006\_Blank standardisation.t3r  
 jOH -0.5 3/26/2018 4:16:34 PM C:\Sirius\_T3\18C-26006\_Blank standardisation.t3r

### Titrants

0.50 M HCl 0.994478 3/26/2018 4:16:34 PM C:\Sirius\_T3\18C-26006\_Blank standardisation.t3r  
 0.50 M KOH 1.003190 3/26/2018 4:16:35 PM C:\Sirius\_T3\KOH18C23.t3r

### Sample

M13\_octanol concentration factor 0.639  
 Base pKa 1 5.77  
 logP (XH +) -4.56  
 logP (neutral X) 2.85

### Sample graphs

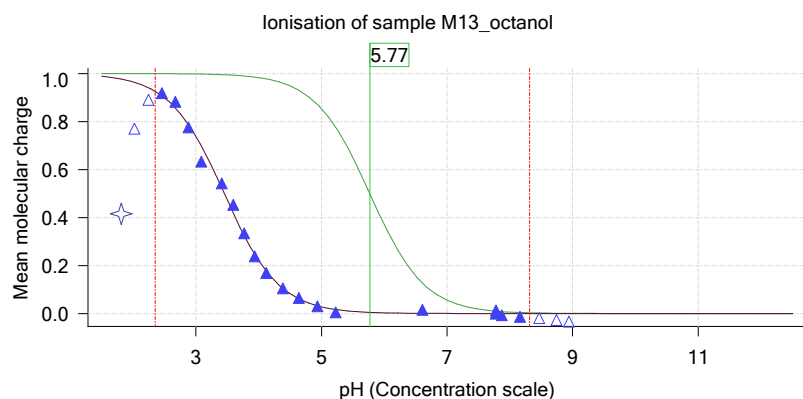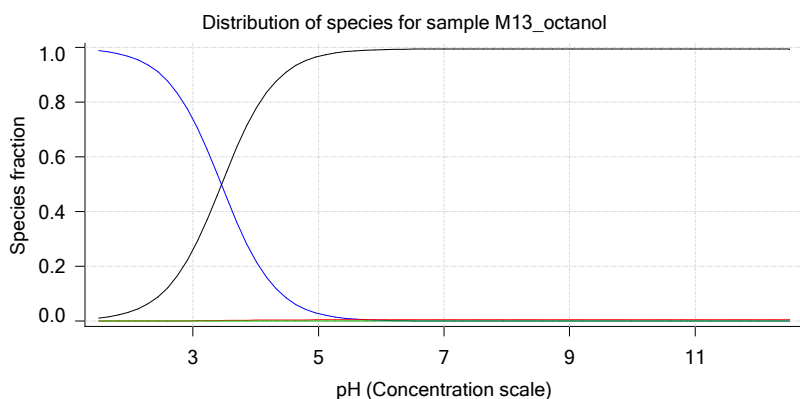

Sample name: **M13\_octanol**  
Assay name: **pH-metric high logP**  
Assay ID: **18C-26010**  
Filename: **C:\Sirius\_T3\Mehtap\20180327\_exp34\_logP\_T3-2\18C-26010\_M13\_octanol\_pH-metric high logP.t3r**

Experiment start time: **3/26/2018 4:16:35 PM**  
Analyst: **Pion**  
Instrument ID: **T312060**

## Sample graphs (continued)

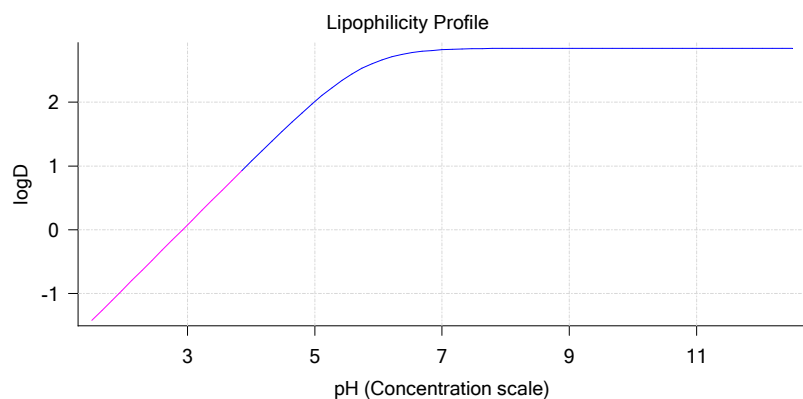

## Sample logD and percent species

| pH     | M13_octanol<br>logD | M13_octanol<br>M13_octanolH | M13_octanol<br>M13_octanol | M13_octanol<br>M13_octanolH* | M13_octanol<br>M13_octanol* | Comment    |
|--------|---------------------|-----------------------------|----------------------------|------------------------------|-----------------------------|------------|
| 1.000  | -1.92               | 99.65 %                     | 0.00 %                     | 0.00 %                       | 0.35 %                      | Stomach pH |
| 1.200  | -1.72               | 99.44 %                     | 0.00 %                     | 0.00 %                       | 0.55 %                      |            |
| 2.000  | -0.92               | 96.60 %                     | 0.02 %                     | 0.00 %                       | 3.39 %                      |            |
| 3.000  | 0.08                | 73.95 %                     | 0.13 %                     | 0.00 %                       | 25.93 %                     |            |
| 4.000  | 1.07                | 22.11 %                     | 0.38 %                     | 0.00 %                       | 77.52 %                     |            |
| 5.000  | 2.01                | 2.76 %                      | 0.47 %                     | 0.00 %                       | 96.77 %                     | Blood pH   |
| 6.000  | 2.65                | 0.28 %                      | 0.48 %                     | 0.00 %                       | 99.24 %                     |            |
| 6.500  | 2.77                | 0.09 %                      | 0.48 %                     | 0.00 %                       | 99.43 %                     |            |
| 7.000  | 2.82                | 0.03 %                      | 0.48 %                     | 0.00 %                       | 99.49 %                     |            |
| 7.400  | 2.84                | 0.01 %                      | 0.48 %                     | 0.00 %                       | 99.51 %                     |            |
| 8.000  | 2.84                | 0.00 %                      | 0.48 %                     | 0.00 %                       | 99.52 %                     |            |
| 9.000  | 2.85                | 0.00 %                      | 0.48 %                     | 0.00 %                       | 99.52 %                     |            |
| 10.000 | 2.85                | 0.00 %                      | 0.48 %                     | 0.00 %                       | 99.52 %                     |            |
| 11.000 | 2.85                | 0.00 %                      | 0.48 %                     | 0.00 %                       | 99.52 %                     |            |
| 12.000 | 2.85                | 0.00 %                      | 0.48 %                     | 0.00 %                       | 99.52 %                     |            |

## Carbonate and acidity

Carbonate 0.105 mM  
Acidity error 2.156 mM

## Other graphs

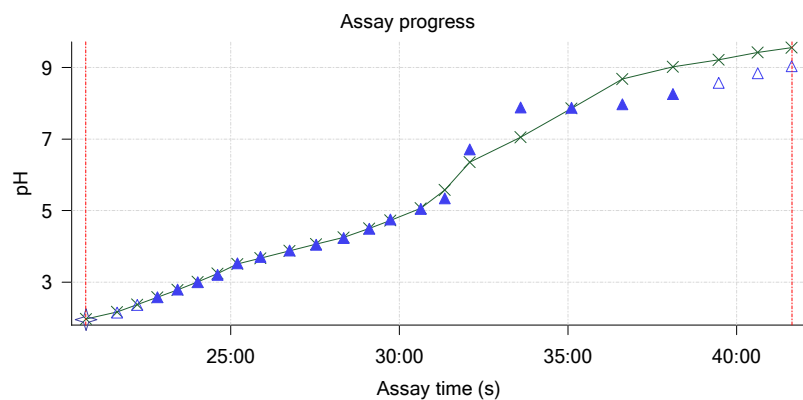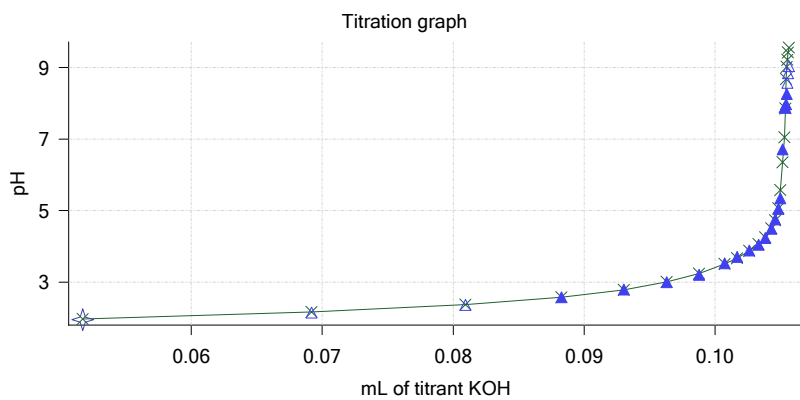



Sample name: **M13\_octanol**  
 Assay name: **pH-metric high logP**  
 Assay ID: **18C-26010**  
 Filename: **C:\Sirius\_T3\Mehtap\20180327\_exp34\_logP\_T3-2\18C-26010\_M13\_octanol\_pH-metric high logP.t3r**

Experiment start time: **3/26/2018 4:16:35 PM**  
 Analyst: **Pion**  
 Instrument ID: **T312060**

## Other graphs (continued)

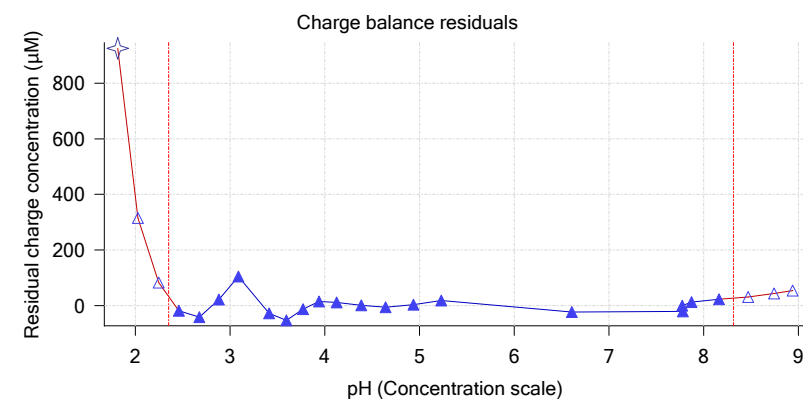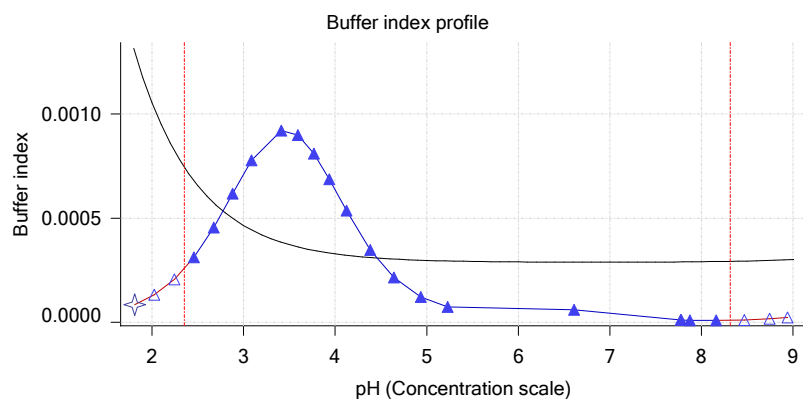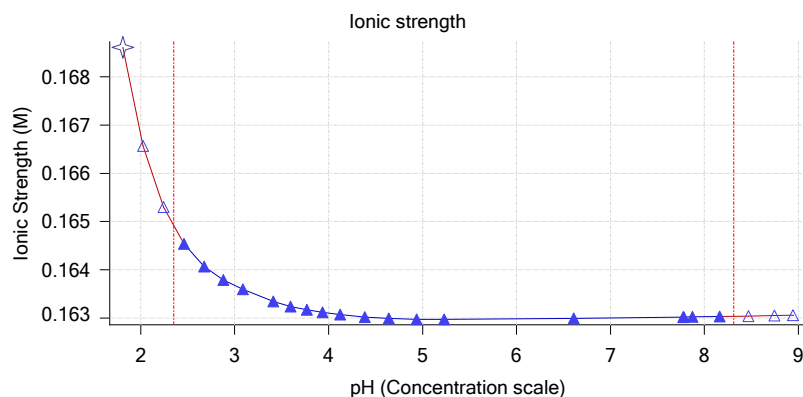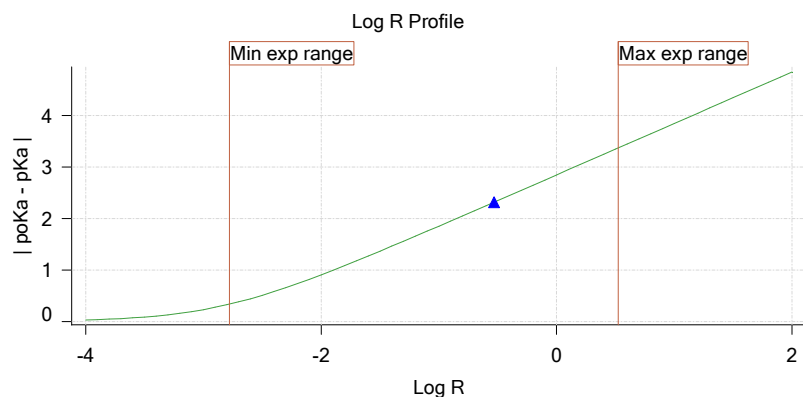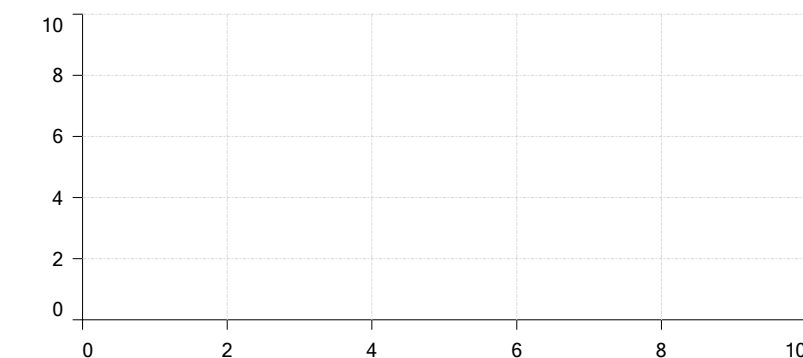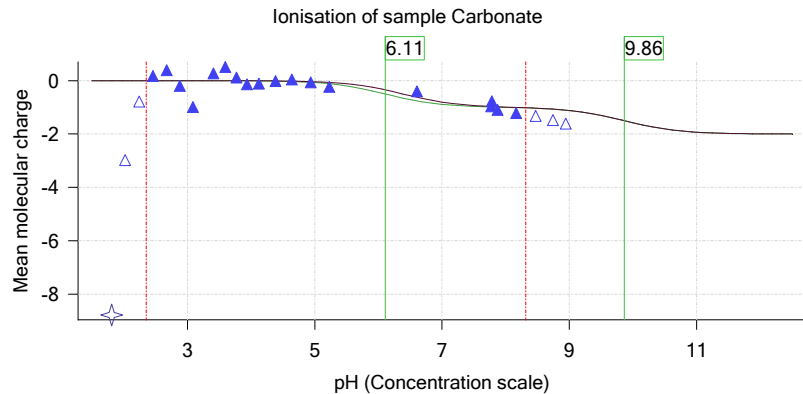

Sample name: **M13\_octanol**  
 Assay name: **pH-metric high logP**  
 Assay ID: **18C-26010**  
 Filename: **C:\Sirius\_T3\Mehtap\20180327\_exp34\_logP\_T3-2\18C-26010\_M13\_octanol\_pH-metric high logP.t3r**

Experiment start time: **3/26/2018 4:16:35 PM**  
 Analyst: **Pion**  
 Instrument ID: **T312060**

pH-metric high logP Titration 3 of 3 18C-26010 Points 41 to 68

## Overall results

RMSD 0.220  
 Average ionic strength 0.169 M  
 Average temperature 25.0°C  
 Partition ratio 0.6600 : 1  
 Analyte concentration range 1412.7 µM to 1440.3 µM  
 Total points considered 23 of 28

## Warnings and errors

Errors None  
 Warnings One or more logP values out of range  
 Excessive acidity error present

## Four-Plus parameters

Alpha 0.122 3/26/2018 4:16:34 PM C:\Sirius\_T3\18C-26006\_Blank standardisation.t3r  
 S 0.9974 3/26/2018 4:16:34 PM C:\Sirius\_T3\18C-26006\_Blank standardisation.t3r  
 jH 1.1 3/26/2018 4:16:34 PM C:\Sirius\_T3\18C-26006\_Blank standardisation.t3r  
 jOH -0.5 3/26/2018 4:16:34 PM C:\Sirius\_T3\18C-26006\_Blank standardisation.t3r

## Titrants

0.50 M HCl 0.994478 3/26/2018 4:16:34 PM C:\Sirius\_T3\18C-26006\_Blank standardisation.t3r  
 0.50 M KOH 1.003190 3/26/2018 4:16:35 PM C:\Sirius\_T3\KOH18C23.t3r

## Sample

M13\_octanol concentration factor 0.745  
 Base pKa 1 5.77  
 logP (XH +) -4.56  
 logP (neutral X) 2.73

## Sample graphs

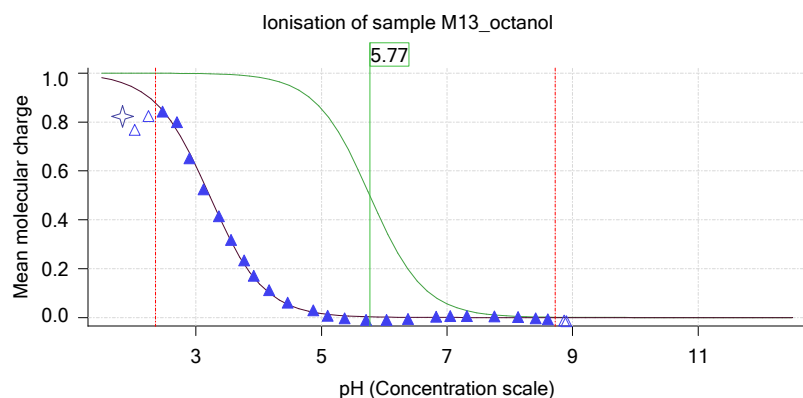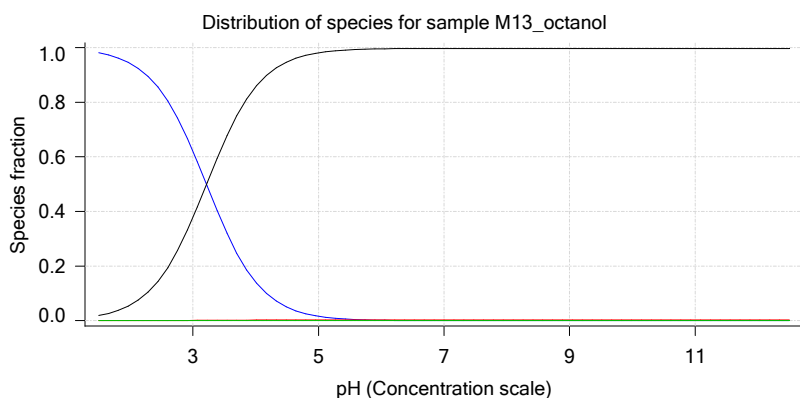

Sample name: **M13\_octanol**  
Assay name: **pH-metric high logP**  
Assay ID: **18C-26010**  
Filename: **C:\Sirius\_T3\Mehtap\20180327\_exp34\_logP\_T3-2\18C-26010\_M13\_octanol\_pH-metric high logP.t3r**

Experiment start time: **3/26/2018 4:16:35 PM**  
Analyst: **Pion**  
Instrument ID: **T312060**

## Sample graphs (continued)

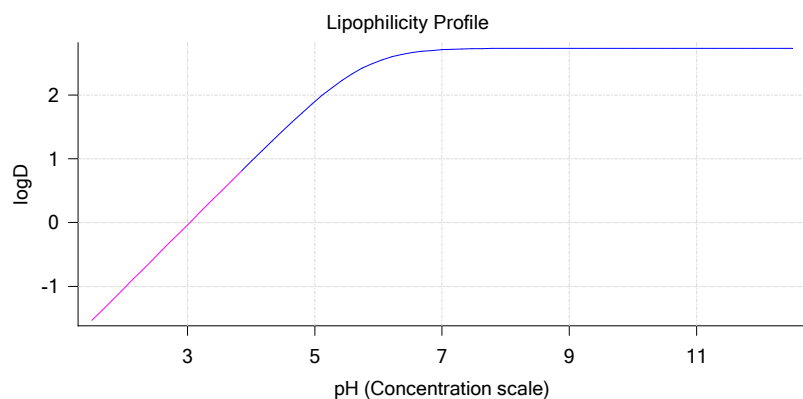

## Sample logD and percent species

| pH     | M13_octanol<br>logD | M13_octanol<br>M13_octanolH | M13_octanol<br>M13_octanolH | M13_octanol<br>M13_octanolH* | M13_octanol<br>M13_octanol* | Comment    |
|--------|---------------------|-----------------------------|-----------------------------|------------------------------|-----------------------------|------------|
| 1.000  | -2.04               | 99.39 %                     | 0.00 %                      | 0.00 %                       | 0.60 %                      | Stomach pH |
| 1.200  | -1.84               | 99.04 %                     | 0.00 %                      | 0.00 %                       | 0.95 %                      |            |
| 2.000  | -1.04               | 94.26 %                     | 0.02 %                      | 0.00 %                       | 5.72 %                      |            |
| 3.000  | -0.04               | 62.18 %                     | 0.11 %                      | 0.00 %                       | 37.72 %                     |            |
| 4.000  | 0.96                | 14.12 %                     | 0.24 %                      | 0.00 %                       | 85.64 %                     |            |
| 5.000  | 1.90                | 1.62 %                      | 0.27 %                      | 0.00 %                       | 98.11 %                     | Blood pH   |
| 6.000  | 2.53                | 0.16 %                      | 0.28 %                      | 0.00 %                       | 99.56 %                     |            |
| 6.500  | 2.66                | 0.05 %                      | 0.28 %                      | 0.00 %                       | 99.67 %                     |            |
| 7.000  | 2.71                | 0.02 %                      | 0.28 %                      | 0.00 %                       | 99.70 %                     |            |
| 7.400  | 2.72                | 0.01 %                      | 0.28 %                      | 0.00 %                       | 99.71 %                     |            |
| 8.000  | 2.73                | 0.00 %                      | 0.28 %                      | 0.00 %                       | 99.72 %                     |            |
| 9.000  | 2.73                | 0.00 %                      | 0.28 %                      | 0.00 %                       | 99.72 %                     |            |
| 10.000 | 2.73                | 0.00 %                      | 0.28 %                      | 0.00 %                       | 99.72 %                     |            |
| 11.000 | 2.73                | 0.00 %                      | 0.28 %                      | 0.00 %                       | 99.72 %                     |            |
| 12.000 | 2.73                | 0.00 %                      | 0.28 %                      | 0.00 %                       | 99.72 %                     |            |

## Carbonate and acidity

Carbonate 0.113 mM  
Acidity error 2.156 mM

## Other graphs

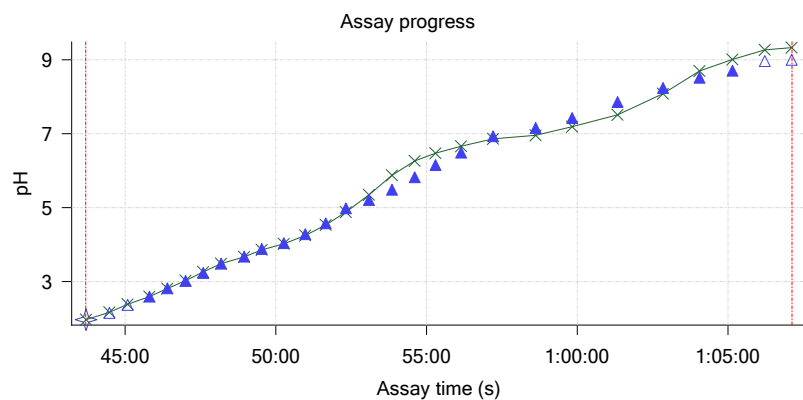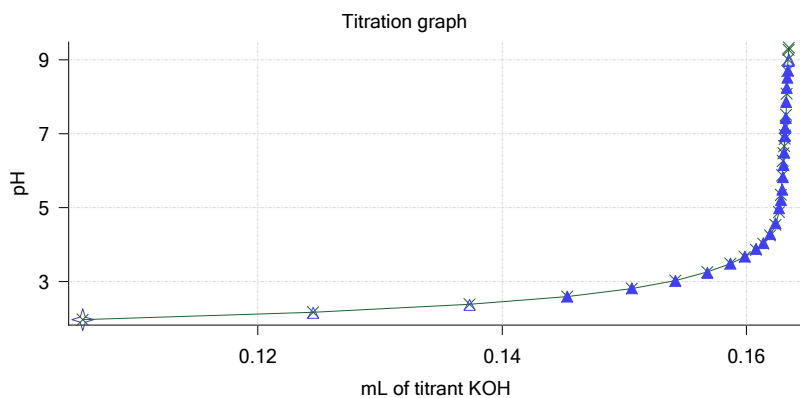

Sample name: **M13\_octanol**  
 Assay name: **pH-metric high logP**  
 Assay ID: **18C-26010**  
 Filename: **C:\Sirius\_T3\Mehtap\20180327\_exp34\_logP\_T3-2\18C-26010\_M13\_octanol\_pH-metric high logP.t3r**

Experiment start time: **3/26/2018 4:16:35 PM**  
 Analyst: **Pion**  
 Instrument ID: **T312060**

## Other graphs (continued)

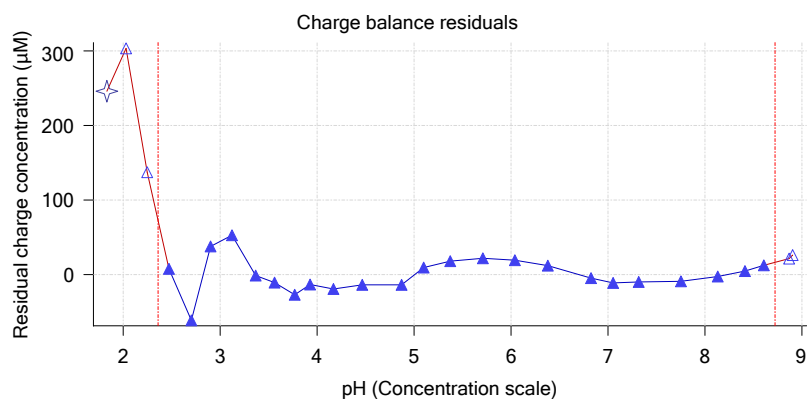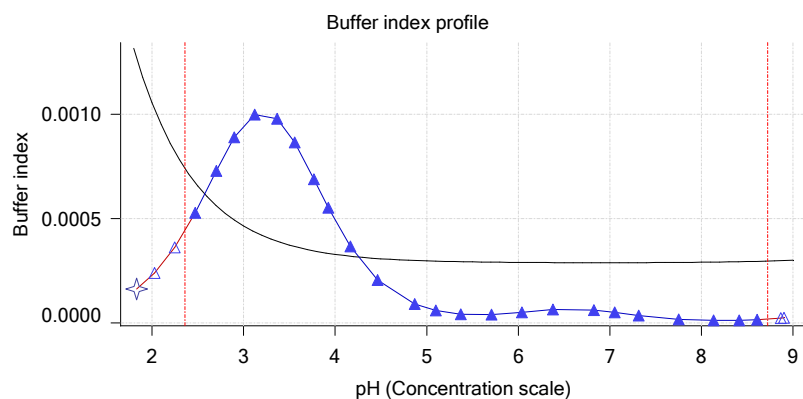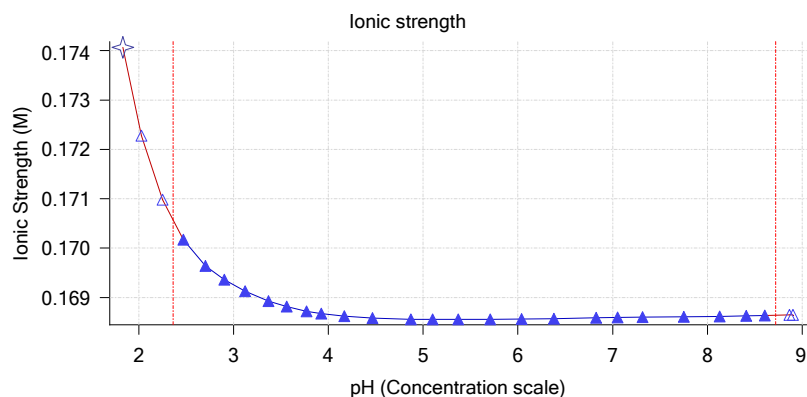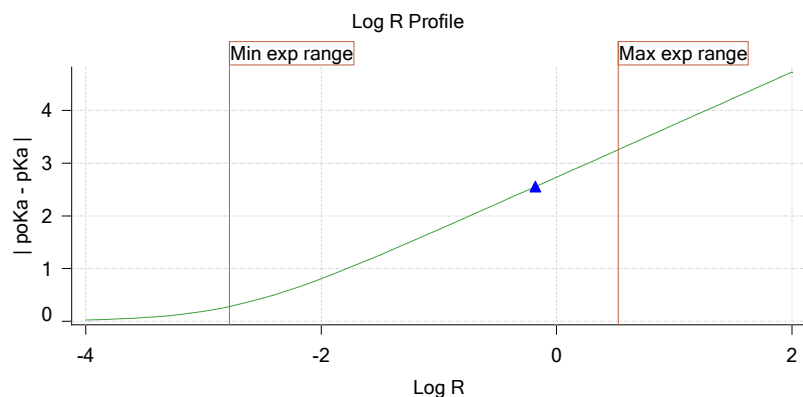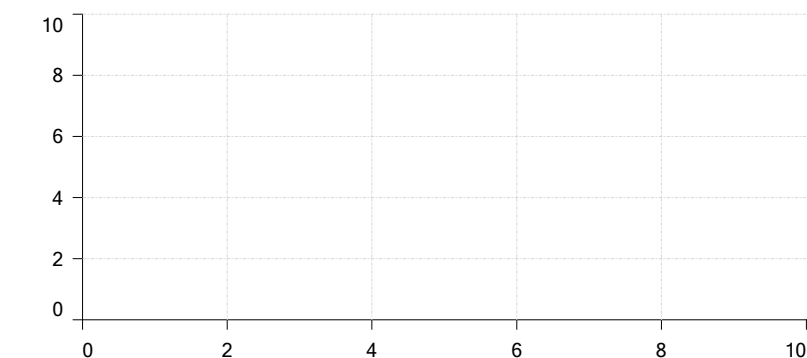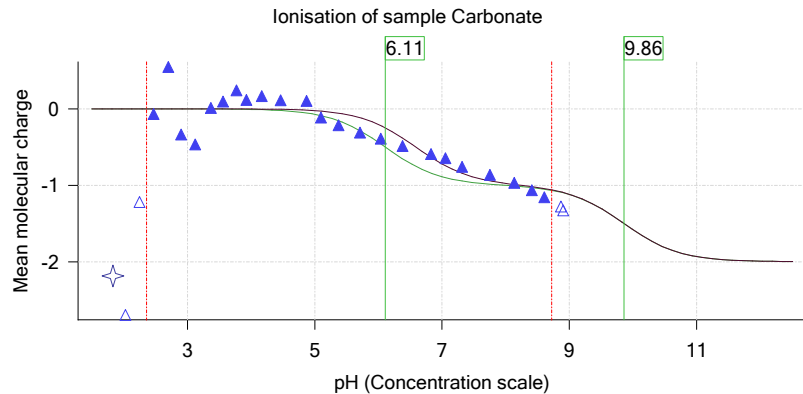

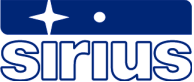

## Assay model

Sample name: **M13\_octanol** Experiment start time: **3/26/2018 4:16:35 PM**  
Assay name: **pH-metric high logP** Analyst: **Pion**  
Assay ID: **18C-26010** Instrument ID: **T312060**  
Filename: **C:\Sirius\_T3\Mehtap\20180327\_exp34\_logP\_T3-2\18C-26010\_M13\_octanol\_pH-metric high logP.t3r**

## Assay Model

| Settings                          | Value        | Date/Time changed    | Imported from      |
|-----------------------------------|--------------|----------------------|--------------------|
| Sample name                       | M13_octanol  | 2/27/2018 5:57:49 PM | User entered value |
| Sample by                         | Weight       |                      | Default value      |
| Sample weight                     | 0.001260 g   | 3/26/2018 4:15:03 PM | User entered value |
| Formula weight                    | 295.34 g/mol | 2/27/2018 5:57:49 PM | User entered value |
| Solubility                        | Unknown      |                      | Default value      |
| Molecular weight                  | 295.34       | 2/27/2018 5:57:49 PM | User entered value |
| Individual pKa ionic environments | No           |                      | Default value      |
| Number of pKas                    | 1            | 2/27/2018 5:57:49 PM | User entered value |
| Sample is a                       | Base         | 2/27/2018 5:57:49 PM | User entered value |
| pKa 1                             | 5.77         | 2/27/2018 5:57:49 PM | User entered value |
| logp (XH +)                       | -4.56        | 3/2/2018 4:30:48 PM  | User entered value |
| logP (neutral X)                  | 2.99         | 3/2/2018 4:30:43 PM  | User entered value |

## Events

| Time    | Event                  | Water      | Acid       | Base       | Octanol    | pH    | dpH/dt   | pH R-squared | pH SD   | dpH/<br>time      |
|---------|------------------------|------------|------------|------------|------------|-------|----------|--------------|---------|-------------------|
| 5:17.0  | Manual volume addition |            |            |            | 0.20000 mL |       |          |              |         |                   |
| 5:18.1  | Initial pH = 3.49      |            |            |            |            |       |          |              |         |                   |
| 8:22.9  | Data point 2           | 1.50000 mL | 0.04473 mL | 0.00553 mL | 0.20000 mL | 2.003 | -0.00959 | 0.73625      | 0.00055 | 10.5<br>s         |
| 9:09.4  | Data point 3           | 1.50000 mL | 0.04473 mL | 0.02016 mL | 0.20000 mL | 2.209 | 0.00564  | 0.12526      | 0.00079 | 10.0<br>s         |
| 9:45.0  | Data point 4           | 1.50000 mL | 0.04473 mL | 0.02970 mL | 0.20000 mL | 2.418 | 0.01231  | 0.87847      | 0.00065 | 10.5<br>s         |
| 10:21.0 | Data point 5           | 1.50000 mL | 0.04473 mL | 0.03568 mL | 0.20000 mL | 2.638 | 0.00365  | 0.22847      | 0.00038 | 10.5<br>s         |
| 10:57.1 | Data point 6           | 1.50000 mL | 0.04473 mL | 0.03944 mL | 0.20000 mL | 2.855 | -0.00035 | 0.00242      | 0.00035 | 10.0<br>s         |
| 11:32.6 | Data point 7           | 1.50000 mL | 0.04473 mL | 0.04198 mL | 0.20000 mL | 3.087 | 0.00584  | 0.40770      | 0.00045 | 10.5<br>s         |
| 12:08.5 | Data point 8           | 1.50000 mL | 0.04473 mL | 0.04384 mL | 0.20000 mL | 3.358 | -0.00076 | 0.00844      | 0.00041 | 10.0<br>s         |
| 12:59.5 | Data point 9           | 1.50000 mL | 0.04473 mL | 0.04501 mL | 0.20000 mL | 3.555 | -0.00079 | 0.00582      | 0.00051 | 10.5<br>s         |
| 13:45.7 | Data point 10          | 1.50000 mL | 0.04473 mL | 0.04603 mL | 0.20000 mL | 3.736 | -0.01231 | 0.48567      | 0.00087 | 10.5<br>s         |
| 14:32.0 | Data point 11          | 1.50000 mL | 0.04473 mL | 0.04734 mL | 0.20000 mL | 3.933 | -0.00938 | 0.30311      | 0.00084 | 11.0<br>s         |
| 15:08.5 | Data point 12          | 1.50000 mL | 0.04473 mL | 0.04842 mL | 0.20000 mL | 4.073 | -0.01778 | 0.77327      | 0.00100 | 13.5<br>s         |
| 16:08.2 | Data point 13          | 1.50000 mL | 0.04473 mL | 0.04972 mL | 0.20000 mL | 4.259 | -0.01176 | 0.47760      | 0.00084 | 14.5<br>s         |
| 16:58.3 | Data point 14          | 1.50000 mL | 0.04473 mL | 0.05045 mL | 0.20000 mL | 4.506 | 0.01843  | 0.89339      | 0.00096 | 21.0<br>s         |
| 17:44.7 | Data point 15          | 1.50000 mL | 0.04473 mL | 0.05096 mL | 0.20000 mL | 4.931 | 0.01593  | 0.72074      | 0.00093 | 22.5<br>s         |
| 18:37.6 | Data point 16          | 1.50000 mL | 0.04473 mL | 0.05172 mL | 0.20000 mL | 9.043 | -0.08412 | 0.99442      | 0.00416 | Time<br>out<br>at |
| 20:42.7 | Data point 17          | 1.50000 mL | 0.09854 mL | 0.05172 mL | 0.50000 mL | 1.945 | 0.00587  | 0.10684      | 0.00089 | 19.0<br>s         |
| 21:38.0 | Data point 18          | 1.50000 mL | 0.09854 mL | 0.06919 mL | 0.50000 mL | 2.151 | -0.00296 | 0.10195      | 0.00046 | 10.0<br>s         |
| 22:13.6 | Data point 19          | 1.50000 mL | 0.09854 mL | 0.08095 mL | 0.50000 mL | 2.366 | 0.00068  | 0.00245      | 0.00068 | 10.5<br>s         |
| 22:49.6 | Data point 20          | 1.50000 mL | 0.09854 mL | 0.08826 mL | 0.50000 mL | 2.578 | -0.01356 | 0.80667      | 0.00075 | 10.0<br>s         |

Sample name: **M13\_octanol**  
 Assay name: **pH-metric high logP**  
 Assay ID: **18C-26010**  
 Filename: **C:\Sirius\_T3\Mehtap\20180327\_exp34\_logP\_T3-2\18C-26010\_M13\_octanol\_pH-metric high logP.t3r**

Experiment start time: **3/26/2018 4:16:35 PM**  
 Analyst: **Pion**  
 Instrument ID: **T312060**

## Events (continued)

| Time      | Event         | Water      | Acid       | Base       | Octanol    | pH    | dpH/dt   | pH R-squared | pH SD   | dpH/dt time         |
|-----------|---------------|------------|------------|------------|------------|-------|----------|--------------|---------|---------------------|
| 23:25.1   | Data point 21 | 1.50000 mL | 0.09854 mL | 0.09304 mL | 0.50000 mL | 2.792 | 0.00291  | 0.03033      | 0.00083 | 10.5 s              |
| 24:01.1   | Data point 22 | 1.50000 mL | 0.09854 mL | 0.09631 mL | 0.50000 mL | 2.996 | -0.00625 | 0.16494      | 0.00076 | 10.0 s              |
| 24:36.5   | Data point 23 | 1.50000 mL | 0.09854 mL | 0.09878 mL | 0.50000 mL | 3.202 | -0.00833 | 0.32865      | 0.00072 | 10.0 s              |
| 25:11.7   | Data point 24 | 1.50000 mL | 0.09854 mL | 0.10073 mL | 0.50000 mL | 3.524 | -0.01622 | 0.91829      | 0.00084 | 10.5 s              |
| 25:52.8   | Data point 25 | 1.50000 mL | 0.09854 mL | 0.10167 mL | 0.50000 mL | 3.706 | -0.01693 | 0.76864      | 0.00095 | 11.0 s              |
| 26:44.5   | Data point 26 | 1.50000 mL | 0.09854 mL | 0.10261 mL | 0.50000 mL | 3.881 | -0.01256 | 0.44869      | 0.00093 | 12.0 s              |
| 27:32.0   | Data point 27 | 1.50000 mL | 0.09854 mL | 0.10332 mL | 0.50000 mL | 4.048 | -0.01675 | 0.86339      | 0.00089 | 13.0 s              |
| 28:20.7   | Data point 28 | 1.50000 mL | 0.09854 mL | 0.10383 mL | 0.50000 mL | 4.234 | -0.01972 | 0.95699      | 0.00100 | 10.0 s              |
| 29:06.4   | Data point 29 | 1.50000 mL | 0.09854 mL | 0.10430 mL | 0.50000 mL | 4.495 | -0.01298 | 0.53508      | 0.00088 | 12.0 s              |
| 29:43.8   | Data point 30 | 1.50000 mL | 0.09854 mL | 0.10459 mL | 0.50000 mL | 4.751 | 0.01337  | 0.62718      | 0.00083 | 23.5 s              |
| 30:37.9   | Data point 31 | 1.50000 mL | 0.09854 mL | 0.10482 mL | 0.50000 mL | 5.045 | -0.01188 | 0.50324      | 0.00083 | 12.5 s              |
| 31:21.0   | Data point 32 | 1.50000 mL | 0.09854 mL | 0.10499 mL | 0.50000 mL | 5.337 | -0.01679 | 0.75428      | 0.00095 | 13.5 s              |
| 32:05.0   | Data point 33 | 1.50000 mL | 0.09854 mL | 0.10515 mL | 0.50000 mL | 6.712 | -0.05259 | 0.99413      | 0.00261 | Timed out at 59.5 s |
| 33:35.6   | Data point 34 | 1.50000 mL | 0.09854 mL | 0.10529 mL | 0.50000 mL | 7.882 | -0.07582 | 0.99362      | 0.00376 | Timed out at 59.5 s |
| 35:06.1   | Data point 35 | 1.50000 mL | 0.09854 mL | 0.10536 mL | 0.50000 mL | 7.874 | -0.03303 | 0.99176      | 0.00164 | Timed out at 59.5 s |
| 36:36.6   | Data point 36 | 1.50000 mL | 0.09854 mL | 0.10541 mL | 0.50000 mL | 7.975 | -0.02481 | 0.97940      | 0.00124 | Timed out at 59.5 s |
| 38:07.1   | Data point 37 | 1.50000 mL | 0.09854 mL | 0.10546 mL | 0.50000 mL | 8.262 | -0.01947 | 0.94137      | 0.00099 | 50.5 s              |
| 39:28.1   | Data point 38 | 1.50000 mL | 0.09854 mL | 0.10550 mL | 0.50000 mL | 8.569 | -0.01705 | 0.77622      | 0.00096 | 34.0 s              |
| 40:37.7   | Data point 39 | 1.50000 mL | 0.09854 mL | 0.10557 mL | 0.50000 mL | 8.843 | -0.01363 | 0.52717      | 0.00093 | 24.5 s              |
| 41:37.8   | Data point 40 | 1.50000 mL | 0.09854 mL | 0.10564 mL | 0.50000 mL | 9.039 | -0.01553 | 0.70869      | 0.00091 | 19.0 s              |
| 43:42.7   | Data point 41 | 1.50000 mL | 0.15644 mL | 0.10564 mL | 1.20000 mL | 1.964 | -0.01340 | 0.57402      | 0.00087 | 10.0 s              |
| 44:28.9   | Data point 42 | 1.50000 mL | 0.15644 mL | 0.12453 mL | 1.20000 mL | 2.154 | 0.00096  | 0.01426      | 0.00040 | 10.5 s              |
| 45:05.1   | Data point 43 | 1.50000 mL | 0.15644 mL | 0.13735 mL | 1.20000 mL | 2.370 | 0.01091  | 0.34363      | 0.00092 | 18.0 s              |
| 45:48.7   | Data point 44 | 1.50000 mL | 0.15644 mL | 0.14532 mL | 1.20000 mL | 2.589 | -0.00436 | 0.09759      | 0.00069 | 10.0 s              |
| 46:24.3   | Data point 45 | 1.50000 mL | 0.15644 mL | 0.15061 mL | 1.20000 mL | 2.818 | -0.00140 | 0.02683      | 0.00042 | 10.5 s              |
| 47:00.3   | Data point 46 | 1.50000 mL | 0.15644 mL | 0.15419 mL | 1.20000 mL | 3.015 | -0.01292 | 0.43338      | 0.00097 | 10.0 s              |
| 47:35.8   | Data point 47 | 1.50000 mL | 0.15644 mL | 0.15682 mL | 1.20000 mL | 3.235 | -0.00551 | 0.33990      | 0.00047 | 10.0 s              |
| 48:11.2   | Data point 48 | 1.50000 mL | 0.15644 mL | 0.15870 mL | 1.20000 mL | 3.480 | -0.00486 | 0.44316      | 0.00036 | 10.0 s              |
| 48:57.0   | Data point 49 | 1.50000 mL | 0.15644 mL | 0.15988 mL | 1.20000 mL | 3.672 | -0.01560 | 0.96977      | 0.00078 | 10.0 s              |
| 49:32.4   | Data point 50 | 1.50000 mL | 0.15644 mL | 0.16079 mL | 1.20000 mL | 3.881 | 0.00315  | 0.02822      | 0.00093 | 18.5 s              |
| 50:16.3   | Data point 51 | 1.50000 mL | 0.15644 mL | 0.16138 mL | 1.20000 mL | 4.036 | -0.01090 | 0.30494      | 0.00098 | 12.0 s              |
| 50:58.8   | Data point 52 | 1.50000 mL | 0.15644 mL | 0.16195 mL | 1.20000 mL | 4.277 | -0.01737 | 0.75358      | 0.00099 | 10.0 s              |
| 51:39.4   | Data point 53 | 1.50000 mL | 0.15644 mL | 0.16239 mL | 1.20000 mL | 4.574 | -0.01819 | 0.84303      | 0.00098 | 10.0 s              |
| 52:19.8   | Data point 54 | 1.50000 mL | 0.15644 mL | 0.16268 mL | 1.20000 mL | 4.979 | -0.01369 | 0.66561      | 0.00083 | 10.0 s              |
| 53:05.6   | Data point 55 | 1.50000 mL | 0.15644 mL | 0.16284 mL | 1.20000 mL | 5.207 | -0.00278 | 0.09353      | 0.00045 | 10.0 s              |
| 53:51.2   | Data point 56 | 1.50000 mL | 0.15644 mL | 0.16294 mL | 1.20000 mL | 5.479 | -0.00914 | 0.49731      | 0.00064 | 10.0 s              |
| 54:36.8   | Data point 57 | 1.50000 mL | 0.15644 mL | 0.16301 mL | 1.20000 mL | 5.816 | -0.01695 | 0.93689      | 0.00086 | 10.5 s              |
| 55:17.8   | Data point 58 | 1.50000 mL | 0.15644 mL | 0.16305 mL | 1.20000 mL | 6.145 | -0.00680 | 0.14161      | 0.00089 | 20.5 s              |
| 56:08.7   | Data point 59 | 1.50000 mL | 0.15644 mL | 0.16310 mL | 1.20000 mL | 6.484 | -0.01501 | 0.62688      | 0.00094 | 33.5 s              |
| 57:12.7   | Data point 60 | 1.50000 mL | 0.15644 mL | 0.16315 mL | 1.20000 mL | 6.929 | -0.01950 | 0.93593      | 0.00100 | 59.0 s              |
| 58:37.2   | Data point 61 | 1.50000 mL | 0.15644 mL | 0.16317 mL | 1.20000 mL | 7.157 | -0.01773 | 0.81355      | 0.00097 | 42.0 s              |
| 59:49.7   | Data point 62 | 1.50000 mL | 0.15644 mL | 0.16322 mL | 1.20000 mL | 7.418 | -0.02771 | 0.99293      | 0.00137 | Timed out at 59.5 s |
| 1:01:20.3 | Data point 63 | 1.50000 mL | 0.15644 mL | 0.16326 mL | 1.20000 mL | 7.854 | -0.03775 | 0.96659      | 0.00190 | Timed out at 59.5 s |
| 1:02:50.9 | Data point 64 | 1.50000 mL | 0.15644 mL | 0.16331 mL | 1.20000 mL | 8.232 | -0.01636 | 0.69169      | 0.00097 | 42.0 s              |
| 1:04:03.3 | Data point 65 | 1.50000 mL | 0.15644 mL | 0.16336 mL | 1.20000 mL | 8.510 | -0.01437 | 0.53636      | 0.00097 | 35.0 s              |
| 1:05:08.9 | Data point 66 | 1.50000 mL | 0.15644 mL | 0.16340 mL | 1.20000 mL | 8.705 | -0.01715 | 0.74002      | 0.00098 | 28.5 s              |
| 1:06:13.2 | Data point 67 | 1.50000 mL | 0.15644 mL | 0.16348 mL | 1.20000 mL | 8.966 | -0.00089 | 0.00198      | 0.00099 | 28.0 s              |
| 1:07:06.6 | Data point 68 | 1.50000 mL | 0.15644 mL | 0.16350 mL | 1.20000 mL | 9.001 | 0.00342  | 0.03245      | 0.00094 | 26.5 s              |
| 1:07:42.2 | Assay volumes | 1.50000 mL | 0.15644 mL | 0.16350 mL | 1.20000 mL |       |          |              |         |                     |

Sample name: **M13\_octanol**  
 Assay name: **pH-metric high logP**  
 Assay ID: **18C-26010**  
 Filename: **C:\Sirius\_T3\Mehtap\20180327\_exp34\_logP\_T3-2\18C-26010\_M13\_octanol\_pH-metric high logP.t3r**

Experiment start time: **3/26/2018 4:16:35 PM**  
 Analyst: **Pion**  
 Instrument ID: **T312060**

## Assay Settings

| Setting                             | Value              | Original Value | Date/Time changed | Imported from |
|-------------------------------------|--------------------|----------------|-------------------|---------------|
| <b>General Settings</b>             |                    |                |                   |               |
| Analyst name                        | Pion               |                |                   |               |
| <b>Standard Experiment Settings</b> |                    |                |                   |               |
| Number of titrations                | 3                  |                |                   |               |
| Minimum pH                          | 2.000              |                |                   |               |
| Maximum pH                          | 9.000              |                |                   |               |
| pH step between points of           | 0.200              |                |                   |               |
| Minimum titrant addition            | 0.00002 mL         |                |                   |               |
| Maximum titrant addition            | 0.10000 mL         |                |                   |               |
| Argon flow rate                     | 100%               |                |                   |               |
| Start titration using               | Cautious pH adjust |                |                   |               |
| <b>Advanced General Settings</b>    |                    |                |                   |               |
| Detect turbidity using              | None               |                |                   |               |
| Collect turbidity sensor data       | No                 |                |                   |               |
| Collect UV spectra                  | No                 |                |                   |               |
| Stir after titrant addition for     | 5 seconds          |                |                   |               |
| For titrant addition, stir at       | 10%                |                |                   |               |
| <b>Titration Pre-Dose</b>           |                    |                |                   |               |
| Titration pre-dose                  | None               |                |                   |               |
| <b>Assay Medium</b>                 |                    |                |                   |               |
| ISA water volume                    | 1.50 mL            |                |                   |               |
| Water added                         | Automatic          |                |                   |               |
| Partition solvent type              | Octanol            |                |                   |               |
| Partition volume                    | 0.200 mL           |                |                   |               |
| Partition solvent added             | Manual in advance  |                |                   |               |
| After partition addition, stir for  | 1 seconds          |                |                   |               |
| <b>Sample Sonication</b>            |                    |                |                   |               |
| Sonicate                            | Yes                |                |                   |               |
| Adjust pH for sonication            | No                 |                |                   |               |
| Sonicate for                        | 60 seconds         |                |                   |               |
| After sonication stir for           | 20 seconds         |                |                   |               |
| <b>Sample Dissolution</b>           |                    |                |                   |               |
| Perform a dissolution stage         | Yes                |                |                   |               |
| Adjust and hold pH for dissolution  | To start pH        |                |                   |               |
| Stir to dissolve for                | 120 seconds        |                |                   |               |
| For dissolution, stir at            | 10%                |                |                   |               |
| <b>Carbonate purge</b>              |                    |                |                   |               |
| Perform a carbonate purge           | No                 |                |                   |               |
| <b>Temperature Control</b>          |                    |                |                   |               |
| Wait for temperature                | Yes                |                |                   |               |
| Required start temperature          | 25.0°C             |                |                   |               |
| Acceptable deviation                | 0.5°C              |                |                   |               |
| Time to wait                        | 60 seconds         |                |                   |               |
| Stir speed of                       | 50%                |                |                   |               |
| <b>Titration 1</b>                  |                    |                |                   |               |
| Titrate from                        | Low to high pH     |                |                   |               |
| Adjust to start pH                  | Yes                |                |                   |               |
| After pH adjust stir for            | 30 seconds         |                |                   |               |
| Stir to allow partitioning for      | 15 seconds         |                |                   |               |
| Stirrer speed for partitioning      | 50%                |                |                   |               |
| <b>Titration 2</b>                  |                    |                |                   |               |
| Titrate from                        | Low to high pH     |                |                   |               |
| Add additional water                | 0.00 mL            |                |                   |               |
| Additional partition solvent volume | 0.300 mL           |                |                   |               |
| Additional partition solvent added  | Automatic          |                |                   |               |
| After pH adjust stir for            | 30 seconds         |                |                   |               |
| Stir to allow partitioning for      | 15 seconds         |                |                   |               |
| Stirrer speed for partitioning      | 55%                |                |                   |               |



Sample name: **M13\_octanol**  
 Assay name: **pH-metric high logP**  
 Assay ID: **18C-26010**  
 Filename: **C:\Sirius\_T3\Mehtap\20180327\_exp34\_logP\_T3-2\18C-26010\_M13\_octanol\_pH-metric high logP.t3r**

Experiment start time: **3/26/2018 4:16:35 PM**  
 Analyst: **Pion**  
 Instrument ID: **T312060**

## Assay Settings (continued)

| Setting                             | Value          | Original Value | Date/Time changed | Imported from |
|-------------------------------------|----------------|----------------|-------------------|---------------|
| <b>Titration 3</b>                  |                |                |                   |               |
| Titrate from                        | Low to high pH |                |                   |               |
| Add additional water                | 0.00 mL        |                |                   |               |
| Additional partition solvent volume | 0.700 mL       |                |                   |               |
| Additional partition solvent added  | Automatic      |                |                   |               |
| After pH adjust stir for            | 30 seconds     |                |                   |               |
| Stir to allow partitioning for      | 15 seconds     |                |                   |               |
| Stirrer speed for partitioning      | 60%            |                |                   |               |
| <b>Data Point Stability</b>         |                |                |                   |               |
| Stir during data point collection   | No             |                |                   |               |
| Delay before data point collection  | 0 seconds      |                |                   |               |
| Number of points to average         | 20 points      |                |                   |               |
| Time interval between points        | 0.50 seconds   |                |                   |               |
| Required maximum standard deviation | 0.00100 dpH/dt |                |                   |               |
| Stability timeout after             | 60 seconds     |                |                   |               |

## Calibration Settings

| Setting                   | Value  | Date/Time changed    | Imported from                                    |
|---------------------------|--------|----------------------|--------------------------------------------------|
| Four-Plus alpha           | 0.122  | 3/26/2018 4:16:34 PM | C:\Sirius_T3\18C-26006_Blank standardisation.t3r |
| Four-Plus S               | 0.9974 | 3/26/2018 4:16:34 PM | C:\Sirius_T3\18C-26006_Blank standardisation.t3r |
| Four-Plus jH              | 1.1    | 3/26/2018 4:16:34 PM | C:\Sirius_T3\18C-26006_Blank standardisation.t3r |
| Four-Plus jOH             | -0.5   | 3/26/2018 4:16:34 PM | C:\Sirius_T3\18C-26006_Blank standardisation.t3r |
| Base concentration factor | 1.003  | 3/26/2018 4:16:35 PM | C:\Sirius_T3\KOH18C23.t3r                        |
| Acid concentration factor | 0.994  | 3/26/2018 4:16:34 PM | C:\Sirius_T3\18C-26006_Blank standardisation.t3r |

## Instrument Settings

| Setting              | Value                      | Batch Id    | Install date           |
|----------------------|----------------------------|-------------|------------------------|
| Instrument owner     | Merck                      |             |                        |
| Instrument ID        | T312060                    |             |                        |
| Instrument type      | T3 Simulator               |             |                        |
| Software version     | 1.1.3.0                    |             |                        |
| Dispenser module     |                            | T3DM1200361 | 3/31/2009 6:24:52 AM   |
| Dispenser 0          | Water                      |             | 3/31/2009 6:25:05 AM   |
| Syringe volume       | 2.5 mL                     |             |                        |
| Firmware version     | 1.2.1(r2)                  |             |                        |
| Titrant              | Water (0.15 M KCl)         | 02-06-2018  | 3/16/2018 11:09:18 AM  |
| Dispenser 2          | Acid                       |             | 3/31/2009 6:25:11 AM   |
| Syringe volume       | 0.5 mL                     |             |                        |
| Firmware version     | 1.2.1(r2)                  |             |                        |
| Titrant              | Acid (0.5 M HCl)           | 03-16-2018  | 3/16/2018 10:56:23 AM  |
| Dispenser 1          | Base                       |             | 3/31/2009 6:25:21 AM   |
| Syringe volume       | 0.5 mL                     |             |                        |
| Firmware version     | 1.2.1(r2)                  |             |                        |
| Titrant              | Base (0.5 M KOH)           | 3/22/2018   | 3/23/2018 9:34:17 AM   |
| Dispenser 5          | Cosolvent                  |             | 3/31/2009 6:26:24 AM   |
| Syringe volume       | 2.5 mL                     |             |                        |
| Firmware version     | 1.2.1(r2)                  |             |                        |
| Distribution valve 5 | Distribution Valve         |             | 3/31/2009 6:28:19 AM   |
| Firmware version     | 1.1.3                      |             |                        |
| Port A               | Methanol (80%, 0.15 M KCl) | 02-08-2018  | 3/6/2018 10:28:59 AM   |
| Port B               | Cyclohexane                | 11-01-17    | 2/27/2018 11:37:57 AM  |
| Dispenser 3          | Buffer                     |             | 8/3/2010 6:05:16 AM    |
| Syringe volume       | 0.5 mL                     |             |                        |
| Firmware version     | 1.2.1(r2)                  |             |                        |
| Titrant              | Dodecane                   | 2018/01/31  | 2/28/2018 11:18:04 AM  |
| Dispenser 6          | Octanol                    |             | 10/22/2010 11:52:43 AM |



Sample name: **M13\_octanol**  
 Assay name: **pH-metric high logP**  
 Assay ID: **18C-26010**  
 Filename: **C:\Sirius\_T3\Mehtap\20180327\_exp34\_logP\_T3-2\18C-26010\_M13\_octanol\_pH-metric high logP.t3r**

Experiment start time: **3/26/2018 4:16:35 PM**  
 Analyst: **Pion**  
 Instrument ID: **T312060**

## Instrument Settings (continued)

| Setting                                   | Value                      | Batch Id    | Install date           |
|-------------------------------------------|----------------------------|-------------|------------------------|
| Syringe volume                            | 0.5 mL                     |             |                        |
| Firmware version                          | 1.2.1(r2)                  |             |                        |
| Titrant                                   | Octanol                    | 01-31-2018  | 2/27/2018 10:59:35 AM  |
| Titration                                 |                            | T3TM1200161 | 3/31/2009 6:24:17 AM   |
| Horizontal axis firmware version          | 1.17 AI1DI2DO2 Stepper 2   |             |                        |
| Vertical axis firmware version            | 1.17 AI1DI2DO2 Stepper 2   |             |                        |
| Chassis I/O firmware version              | 1.11 AI1DI0DO4 Norgren I/O |             |                        |
| Probe I/O firmware version                | 1.1.1                      |             |                        |
| Electrode                                 | T3 Electrode               | T3E0923     | 1/23/2018 3:01:00 PM   |
| E0 calibration                            | +5.08 mV                   |             | 3/26/2018 4:17:19 PM   |
| Filling solution                          | 3M KCl                     | KCL097      | 3/26/2018 9:20:42 AM   |
| Liquids                                   |                            |             |                        |
| Wash 1                                    | 50% IPA:50% Water          |             | 3/26/2018 9:21:48 AM   |
| Wash 2                                    | 0.5% Triton X-100 in H2O   |             | 3/26/2018 9:21:51 AM   |
| Buffer position 1                         | pH7 Wash                   |             | 3/26/2018 9:21:54 AM   |
| Buffer position 2                         | pH 7                       |             | 3/26/2018 9:21:57 AM   |
| Storage position                          |                            |             | 3/26/2018 9:21:20 AM   |
| Wash water                                | 6.6e+003 mL                | 03-12-2018  | 3/12/2018 9:25:04 AM   |
| Waste                                     | 3.7e+003 mL                |             | 3/12/2018 9:24:49 AM   |
| Temperature controller                    |                            |             | 8/5/2010 7:35:13 AM    |
| Turbidity detector                        |                            |             | 3/31/2009 6:24:45 AM   |
| Spectrometer                              |                            | 074811      | 11/23/2010 12:22:28 PM |
| Dip probe                                 |                            | 10196       |                        |
| Wavelength coefficient A0                 | 183.333                    |             |                        |
| Wavelength coefficient A1                 | 2.21568                    |             |                        |
| Wavelength coefficient A2                 | -0.000289308               |             |                        |
| Total lamp lit time                       | 168:19:11                  |             | 11/23/2010 12:22:28 PM |
| Calibrated on                             | 2/27/2018 11:40:38 AM      |             |                        |
| Integration time                          | 40                         |             |                        |
| Scans averaged                            | 10                         |             |                        |
| Autoloader                                |                            | T3AL1200345 | 11/10/2015 10:34:13 AM |
| Left-right axis firmware version          | 1.17 AI1DI2DO2 Stepper 2   |             |                        |
| Front-back axis firmware version          | 1.17 AI1DI2DO2 Stepper 2   |             |                        |
| Vertical axis firmware version            | 1.17 AI1DI2DO2 Stepper 2   |             |                        |
| Chassis I/O firmware version              | 1.11 AI1DI0DO4 Norgren I/O |             |                        |
| Configuration                             |                            |             |                        |
| Alternate titration position              | Titration position         |             |                        |
| Alternate reference position              | Reference position         |             |                        |
| Maximum standard vial volume              | 3.50 mL                    |             |                        |
| Maximum alternate vial volume             | 25.00 mL                   |             |                        |
| Automatic action idle period              | 5 minute(s)                |             |                        |
| Titration tube volume                     | 1.3 mL                     |             |                        |
| Syringe flush count                       | 3.50                       |             |                        |
| Flowing wash pump volume                  | 20.0 mL                    |             |                        |
| Flowing wash stir duration                | 5 s                        |             |                        |
| Flowing wash stir speed                   | 30%                        |             |                        |
| Solvent wash stir duration                | 5 s                        |             |                        |
| Solvent wash stir speed                   | 30%                        |             |                        |
| Surfactant wash stir duration             | 5 s                        |             |                        |
| Surfactant wash stir speed                | 30%                        |             |                        |
| E0 calibration minimum number of points   | 10                         |             |                        |
| E0 calibration maximum standard deviation | 0.01500                    |             |                        |
| E0 calibration timeout period             | 60 s                       |             |                        |
| E0 calibration stir duration              | 5 s                        |             |                        |
| E0 calibration preparation stir speed     | 30%                        |             |                        |
| E0 calibration buffer wash stir duration  | 5 s                        |             |                        |
| E0 calibration buffer wash stir speed     | 30%                        |             |                        |
| E0 calibration reading stir speed         | 0%                         |             |                        |

Sample name: **M13\_octanol** Experiment start time: **3/26/2018 4:16:35 PM**  
 Assay name: **pH-metric high logP** Analyst: **Pion**  
 Assay ID: **18C-26010** Instrument ID: **T312060**  
 Filename: **C:\Sirius\_T3\Mehtap\20180327\_exp34\_logP\_T3-2\18C-26010\_M13\_octanol\_pH-metric high logP.t3r**

## Instrument Settings (continued)

| Setting                                     | Value   | Batch Id | Install date |
|---------------------------------------------|---------|----------|--------------|
| Spectrometer calibration stir duration      | 5 s     |          |              |
| Spectrometer calibration stir speed         | 30%     |          |              |
| Spectrometer calibration wash pump volume   | 20.0 mL |          |              |
| Spectrometer calibration wash stir duration | 5 s     |          |              |
| Spectrometer calibration wash stir speed    | 30%     |          |              |
| Overhead dispense height                    | 10000   |          |              |

## Refinement Settings

| Setting                        | Value    | Default value |
|--------------------------------|----------|---------------|
| Turbidity detection method     | None     | None          |
| Turbidity wavelength to assess | 500.0 nm | 500.0 nm      |
| Turbidity maximum absorbance   | 0.100    | 0.100         |
| Turbidity probe threshold      | 50.00    | 50.00         |

## Experiment Log

[2:41] Air gap created for Water (0.15 M KCl)  
 [2:41] Air gap created for Acid (0.5 M HCl)  
 [2:41] Air gap created for Base (0.5 M KOH)  
 [2:42] Air gap released for Water (0.15 M KCl)  
 [2:46] Titrator arm moved over Titration position  
 [2:46] Titration 1 of 3  
 [2:46] Adding initial titrants  
 [2:46] Automatically add 1.50000 mL of water  
 [3:11] Dispensed 1.500000 mL of Water (0.15 M KCl)  
 [3:15] Titrator arm moved over Drain  
 [4:56] Titrator arm moved to Titration position  
 [4:56] Argon flow rate set to 100  
 [4:56] Stirrer speed set to 10  
 [5:18] Initial pH = 3.49  
 [5:18] Iterative adjust 3.49 -> 2.00  
 [5:18] pH 3.49 -> 2.00  
 [5:19] Air gap released for Acid (0.5 M HCl)  
 [5:20] Dispensed 0.042404 mL of Acid (0.5 M HCl)  
 [5:25] pH 2.02 -> 2.00  
 [5:25] Dispensed 0.002328 mL of Acid (0.5 M HCl)  
 [5:30] Holding pH 2.00  
 [7:30] Stirrer speed set to 0  
 [7:30] Stirrer speed set to 50  
 [7:30] Iterative adjust 1.95 -> 2.00  
 [7:30] pH 1.95 -> 2.00  
 [7:31] Air gap released for Base (0.5 M KOH)  
 [7:32] Dispensed 0.005527 mL of Base (0.5 M KOH)  
 [8:22] Stirrer speed set to 0  
 [8:33] Datapoint id 2 collected  
 [8:33] Stirrer speed set to 50  
 [8:38] pH 2.01 -> 2.21  
 [8:38] Using cautious pH adjust  
 [8:38] Dispensed 0.007808 mL of Base (0.5 M KOH)  
 [8:43] Stepping pH = 2.09  
 [8:44] Dispensed 0.006068 mL of Base (0.5 M KOH)  
 [8:49] Stepping pH = 2.19  
 [8:49] Dispensed 0.000753 mL of Base (0.5 M KOH)  
 [8:54] Stepping pH = 2.21  
 [9:09] Stirrer speed set to 0  
 [9:19] Datapoint id 3 collected  
 [9:19] Charge balance equation is out by 6.4%  
 [9:19] Stirrer speed set to 50

Sample name: **M13\_octanol**  
 Assay name: **pH-metric high logP**  
 Assay ID: **18C-26010**  
 Filename: **C:\Sirius\_T3\Mehtap\20180327\_exp34\_logP\_T3-2\18C-26010\_M13\_octanol\_pH-metric high logP.t3r**

Experiment start time: **3/26/2018 4:16:35 PM**  
 Analyst: **Pion**  
 Instrument ID: **T312060**

## Experiment Log (continued)

[9:24] pH 2.22 -> 2.42  
 [9:24] Using charge balance adjust  
 [9:24] Dispensed 0.009548 mL of Base (0.5 M KOH)  
 [9:45] Stirrer speed set to 0  
 [9:55] Datapoint id 4 collected  
 [9:55] Charge balance equation is out by -0.4%  
 [9:55] Stirrer speed set to 50  
 [10:00] pH 2.43 -> 2.63  
 [10:00] Using charge balance adjust  
 [10:00] Dispensed 0.005974 mL of Base (0.5 M KOH)  
 [10:21] Stirrer speed set to 0  
 [10:31] Datapoint id 5 collected  
 [10:31] Charge balance equation is out by 5.5%  
 [10:31] Stirrer speed set to 50  
 [10:36] pH 2.65 -> 2.85  
 [10:36] Using charge balance adjust  
 [10:36] Dispensed 0.003763 mL of Base (0.5 M KOH)  
 [10:57] Stirrer speed set to 0  
 [11:07] Datapoint id 6 collected  
 [11:07] Charge balance equation is out by 4.1%  
 [11:07] Stirrer speed set to 50  
 [11:12] pH 2.87 -> 3.07  
 [11:12] Using charge balance adjust  
 [11:12] Dispensed 0.002540 mL of Base (0.5 M KOH)  
 [11:32] Stirrer speed set to 0  
 [11:43] Datapoint id 7 collected  
 [11:43] Charge balance equation is out by 10.5%  
 [11:43] Stirrer speed set to 50  
 [11:48] pH 3.10 -> 3.30  
 [11:48] Using charge balance adjust  
 [11:48] Dispensed 0.001858 mL of Base (0.5 M KOH)  
 [12:08] Stirrer speed set to 0  
 [12:18] Datapoint id 8 collected  
 [12:18] Charge balance equation is out by 30.9%  
 [12:18] Stirrer speed set to 50  
 [12:23] pH 3.36 -> 3.56  
 [12:23] Using cautious pH adjust  
 [12:23] Dispensed 0.000753 mL of Base (0.5 M KOH)  
 [12:28] Stepping pH = 3.52  
 [12:29] Dispensed 0.000212 mL of Base (0.5 M KOH)  
 [12:34] Stepping pH = 3.55  
 [12:34] Dispensed 0.000094 mL of Base (0.5 M KOH)  
 [12:39] Stepping pH = 3.55  
 [12:39] Dispensed 0.000118 mL of Base (0.5 M KOH)  
 [12:44] Stepping pH = 3.57  
 [12:59] Stirrer speed set to 0  
 [13:10] Datapoint id 9 collected  
 [13:10] Charge balance equation is out by 23.3%  
 [13:10] Stirrer speed set to 50  
 [13:15] pH 3.56 -> 3.76  
 [13:15] Using cautious pH adjust  
 [13:15] Dispensed 0.000682 mL of Base (0.5 M KOH)  
 [13:20] Stepping pH = 3.73  
 [13:20] Dispensed 0.000141 mL of Base (0.5 M KOH)  
 [13:25] Stepping pH = 3.74  
 [13:25] Dispensed 0.000188 mL of Base (0.5 M KOH)  
 [13:30] Stepping pH = 3.77  
 [13:45] Stirrer speed set to 0  
 [13:56] Datapoint id 10 collected

Sample name: **M13\_octanol**  
Assay name: **pH-metric high logP**  
Assay ID: **18C-26010**  
Filename: **C:\Sirius\_T3\Mehtap\20180327\_exp34\_logP\_T3-2\18C-26010\_M13\_octanol\_pH-metric high logP.t3r**

Experiment start time: **3/26/2018 4:16:35 PM**  
Analyst: **Pion**  
Instrument ID: **T312060**

## Experiment Log (continued)

[13:56] Charge balance equation is out by 25.9%  
[13:56] Stirrer speed set to 50  
[14:01] pH 3.74 -> 3.94  
[14:01] Using cautious pH adjust  
[14:01] Dispensed 0.000635 mL of Base (0.5 M KOH)  
[14:06] Stepping pH = 3.89  
[14:06] Dispensed 0.000188 mL of Base (0.5 M KOH)  
[14:11] Stepping pH = 3.90  
[14:11] Dispensed 0.000494 mL of Base (0.5 M KOH)  
[14:16] Stepping pH = 4.00  
[14:32] Stirrer speed set to 0  
[14:43] Datapoint id 11 collected  
[14:43] Charge balance equation is out by -4.2%  
[14:43] Stirrer speed set to 50  
[14:48] pH 3.94 -> 4.14  
[14:48] Using charge balance adjust  
[14:48] Dispensed 0.001082 mL of Base (0.5 M KOH)  
[15:08] Stirrer speed set to 0  
[15:22] Datapoint id 12 collected  
[15:22] Charge balance equation is out by -32.8%  
[15:22] Stirrer speed set to 50  
[15:27] pH 4.08 -> 4.28  
[15:27] Using cautious pH adjust  
[15:27] Dispensed 0.000470 mL of Base (0.5 M KOH)  
[15:32] Stepping pH = 4.19  
[15:32] Dispensed 0.000259 mL of Base (0.5 M KOH)  
[15:37] Stepping pH = 4.23  
[15:37] Dispensed 0.000212 mL of Base (0.5 M KOH)  
[15:42] Stepping pH = 4.26  
[15:42] Dispensed 0.000094 mL of Base (0.5 M KOH)  
[15:47] Stepping pH = 4.26  
[15:48] Dispensed 0.000259 mL of Base (0.5 M KOH)  
[15:53] Stepping pH = 4.34  
[16:08] Stirrer speed set to 0  
[16:22] Datapoint id 13 collected  
[16:22] Charge balance equation is out by -36.9%  
[16:22] Stirrer speed set to 50  
[16:27] pH 4.26 -> 4.46  
[16:27] Using cautious pH adjust  
[16:27] Dispensed 0.000376 mL of Base (0.5 M KOH)  
[16:33] Stepping pH = 4.41  
[16:33] Dispensed 0.000094 mL of Base (0.5 M KOH)  
[16:38] Stepping pH = 4.41  
[16:38] Dispensed 0.000259 mL of Base (0.5 M KOH)  
[16:43] Stepping pH = 4.58  
[16:58] Stirrer speed set to 0  
[17:19] Datapoint id 14 collected  
[17:19] Charge balance equation is out by -0.5%  
[17:19] Stirrer speed set to 50  
[17:24] pH 4.50 -> 4.70  
[17:24] Using charge balance adjust  
[17:24] Dispensed 0.000517 mL of Base (0.5 M KOH)  
[17:44] Stirrer speed set to 0  
[18:07] Datapoint id 15 collected  
[18:07] Charge balance equation is out by 114.9%  
[18:07] Stirrer speed set to 50  
[18:12] pH 4.88 -> 5.08  
[18:12] Using cautious pH adjust  
[18:12] Dispensed 0.000118 mL of Base (0.5 M KOH)

Sample name: **M13\_octanol**  
 Assay name: **pH-metric high logP**  
 Assay ID: **18C-26010**  
 Filename: **C:\Sirius\_T3\Mehtap\20180327\_exp34\_logP\_T3-2\18C-26010\_M13\_octanol\_pH-metric high logP.t3r**

Experiment start time: **3/26/2018 4:16:35 PM**  
 Analyst: **Pion**  
 Instrument ID: **T312060**

## Experiment Log (continued)

[18:17] Stepping pH = 4.87  
 [18:17] Dispensed 0.000635 mL of Base (0.5 M KOH)  
 [18:22] Stepping pH = 9.43  
 [18:37] Stirrer speed set to 0  
 [19:37] Datapoint id 16 collected  
 [19:37] Charge balance equation is out by -207.2%  
 [19:37] Titration 2 of 3  
 [19:37] Adding initial titrants  
 [19:37] Automatically add 0.30000 mL of Octanol  
 [19:44] Dispensed 0.300000 mL of Octanol  
 [19:44] Stirrer speed set to 10  
 [19:45] Stirrer speed set to 55  
 [19:45] Iterative adjust 9.03 -> 2.00  
 [19:45] pH 9.03 -> 2.00  
 [19:47] Dispensed 0.052140 mL of Acid (0.5 M HCl)  
 [19:52] pH 2.02 -> 2.00  
 [19:52] Dispensed 0.001670 mL of Acid (0.5 M HCl)  
 [20:42] Stirrer speed set to 0  
 [21:01] Datapoint id 17 collected  
 [21:01] Stirrer speed set to 55  
 [21:06] pH 1.95 -> 2.15  
 [21:06] Using cautious pH adjust  
 [21:07] Dispensed 0.009525 mL of Base (0.5 M KOH)  
 [21:12] Stepping pH = 2.05  
 [21:12] Dispensed 0.006279 mL of Base (0.5 M KOH)  
 [21:17] Stepping pH = 2.13  
 [21:17] Dispensed 0.001670 mL of Base (0.5 M KOH)  
 [21:22] Stepping pH = 2.15  
 [21:38] Stirrer speed set to 0  
 [21:48] Datapoint id 18 collected  
 [21:48] Charge balance equation is out by 8.3%  
 [21:48] Stirrer speed set to 55  
 [21:53] pH 2.16 -> 2.36  
 [21:53] Using charge balance adjust  
 [21:53] Dispensed 0.011759 mL of Base (0.5 M KOH)  
 [22:13] Stirrer speed set to 0  
 [22:24] Datapoint id 19 collected  
 [22:24] Charge balance equation is out by 2.3%  
 [22:24] Stirrer speed set to 55  
 [22:29] pH 2.38 -> 2.58  
 [22:29] Using charge balance adjust  
 [22:29] Dispensed 0.007314 mL of Base (0.5 M KOH)  
 [22:49] Stirrer speed set to 0  
 [22:59] Datapoint id 20 collected  
 [22:59] Charge balance equation is out by 0.9%  
 [22:59] Stirrer speed set to 55  
 [23:04] pH 2.59 -> 2.79  
 [23:04] Using charge balance adjust  
 [23:05] Dispensed 0.004774 mL of Base (0.5 M KOH)  
 [23:25] Stirrer speed set to 0  
 [23:35] Datapoint id 21 collected  
 [23:35] Charge balance equation is out by 2.4%  
 [23:35] Stirrer speed set to 55  
 [23:40] pH 2.81 -> 3.01  
 [23:40] Using charge balance adjust  
 [23:40] Dispensed 0.003269 mL of Base (0.5 M KOH)  
 [24:01] Stirrer speed set to 0  
 [24:11] Datapoint id 22 collected  
 [24:11] Charge balance equation is out by -4.9%

Sample name: **M13\_octanol**  
 Assay name: **pH-metric high logP**  
 Assay ID: **18C-26010**  
 Filename: **C:\Sirius\_T3\Mehtap\20180327\_exp34\_logP\_T3-2\18C-26010\_M13\_octanol\_pH-metric high logP.t3r**

Experiment start time: **3/26/2018 4:16:35 PM**  
 Analyst: **Pion**  
 Instrument ID: **T312060**

## Experiment Log (continued)

[24:11] Stirrer speed set to 55  
 [24:16] pH 3.01 -> 3.21  
 [24:16] Using charge balance adjust  
 [24:16] Dispensed 0.002469 mL of Base (0.5 M KOH)  
 [24:36] Stirrer speed set to 0  
 [24:46] Datapoint id 23 collected  
 [24:46] Charge balance equation is out by -3.0%  
 [24:46] Stirrer speed set to 55  
 [24:51] pH 3.21 -> 3.41  
 [24:51] Using charge balance adjust  
 [24:51] Dispensed 0.001952 mL of Base (0.5 M KOH)  
 [25:11] Stirrer speed set to 0  
 [25:22] Datapoint id 24 collected  
 [25:22] Charge balance equation is out by 54.8%  
 [25:22] Stirrer speed set to 55  
 [25:27] pH 3.53 -> 3.73  
 [25:27] Using cautious pH adjust  
 [25:27] Dispensed 0.000706 mL of Base (0.5 M KOH)  
 [25:32] Stepping pH = 3.68  
 [25:32] Dispensed 0.000235 mL of Base (0.5 M KOH)  
 [25:37] Stepping pH = 3.73  
 [25:52] Stirrer speed set to 0  
 [26:03] Datapoint id 25 collected  
 [26:03] Charge balance equation is out by 34.0%  
 [26:03] Stirrer speed set to 55  
 [26:08] pH 3.72 -> 3.92  
 [26:08] Using cautious pH adjust  
 [26:09] Dispensed 0.000564 mL of Base (0.5 M KOH)  
 [26:14] Stepping pH = 3.85  
 [26:14] Dispensed 0.000188 mL of Base (0.5 M KOH)  
 [26:19] Stepping pH = 3.89  
 [26:19] Dispensed 0.000094 mL of Base (0.5 M KOH)  
 [26:24] Stepping pH = 3.90  
 [26:24] Dispensed 0.000094 mL of Base (0.5 M KOH)  
 [26:29] Stepping pH = 3.92  
 [26:44] Stirrer speed set to 0  
 [26:56] Datapoint id 26 collected  
 [26:56] Charge balance equation is out by 15.5%  
 [26:56] Stirrer speed set to 55  
 [27:01] pH 3.89 -> 4.09  
 [27:01] Using cautious pH adjust  
 [27:01] Dispensed 0.000447 mL of Base (0.5 M KOH)  
 [27:06] Stepping pH = 4.03  
 [27:06] Dispensed 0.000141 mL of Base (0.5 M KOH)  
 [27:11] Stepping pH = 4.06  
 [27:11] Dispensed 0.000118 mL of Base (0.5 M KOH)  
 [27:16] Stepping pH = 4.09  
 [27:32] Stirrer speed set to 0  
 [27:45] Datapoint id 27 collected  
 [27:45] Charge balance equation is out by 19.9%  
 [27:45] Stirrer speed set to 55  
 [27:50] pH 4.06 -> 4.26  
 [27:50] Using cautious pH adjust  
 [27:50] Dispensed 0.000329 mL of Base (0.5 M KOH)  
 [27:55] Stepping pH = 4.19  
 [27:55] Dispensed 0.000118 mL of Base (0.5 M KOH)  
 [28:00] Stepping pH = 4.23  
 [28:00] Dispensed 0.000071 mL of Base (0.5 M KOH)  
 [28:05] Stepping pH = 4.25



Sample name: **M13\_octanol**  
Assay name: **pH-metric high logP**  
Assay ID: **18C-26010**  
Filename: **C:\Sirius\_T3\Mehtap\20180327\_exp34\_logP\_T3-2\18C-26010\_M13\_octanol\_pH-metric high logP.t3r**

Experiment start time: **3/26/2018 4:16:35 PM**  
Analyst: **Pion**  
Instrument ID: **T312060**

## Experiment Log (continued)

[28:20] Stirrer speed set to 0  
[28:30] Datapoint id 28 collected  
[28:30] Charge balance equation is out by 21.2%  
[28:30] Stirrer speed set to 55  
[28:35] pH 4.24 -> 4.44  
[28:35] Using cautious pH adjust  
[28:35] Dispensed 0.000235 mL of Base (0.5 M KOH)  
[28:41] Stepping pH = 4.39  
[28:41] Dispensed 0.000071 mL of Base (0.5 M KOH)  
[28:46] Stepping pH = 4.39  
[28:46] Dispensed 0.000165 mL of Base (0.5 M KOH)  
[28:51] Stepping pH = 4.52  
[29:06] Stirrer speed set to 0  
[29:18] Datapoint id 29 collected  
[29:18] Charge balance equation is out by -0.7%  
[29:18] Stirrer speed set to 55  
[29:23] pH 4.50 -> 4.70  
[29:23] Using charge balance adjust  
[29:23] Dispensed 0.000282 mL of Base (0.5 M KOH)  
[29:43] Stirrer speed set to 0  
[30:07] Datapoint id 30 collected  
[30:07] Charge balance equation is out by 24.6%  
[30:07] Stirrer speed set to 55  
[30:12] pH 4.75 -> 4.95  
[30:12] Using cautious pH adjust  
[30:12] Dispensed 0.000094 mL of Base (0.5 M KOH)  
[30:17] Stepping pH = 4.80  
[30:17] Dispensed 0.000141 mL of Base (0.5 M KOH)  
[30:22] Stepping pH = 5.09  
[30:37] Stirrer speed set to 0  
[30:50] Datapoint id 31 collected  
[30:50] Charge balance equation is out by -26.9%  
[30:50] Stirrer speed set to 55  
[30:55] pH 5.05 -> 5.25  
[30:55] Using cautious pH adjust  
[30:55] Dispensed 0.000047 mL of Base (0.5 M KOH)  
[31:00] Stepping pH = 5.07  
[31:00] Dispensed 0.000118 mL of Base (0.5 M KOH)  
[31:05] Stepping pH = 5.37  
[31:21] Stirrer speed set to 0  
[31:34] Datapoint id 32 collected  
[31:34] Charge balance equation is out by -86.8%  
[31:34] Stirrer speed set to 55  
[31:39] pH 5.41 -> 5.61  
[31:39] Using cautious pH adjust  
[31:39] Dispensed 0.000024 mL of Base (0.5 M KOH)  
[31:44] Stepping pH = 5.40  
[31:44] Dispensed 0.000141 mL of Base (0.5 M KOH)  
[31:49] Stepping pH = 6.97  
[32:05] Stirrer speed set to 0  
[33:05] Datapoint id 33 collected  
[33:05] Charge balance equation is out by -201.9%  
[33:05] Stirrer speed set to 55  
[33:10] pH 6.45 -> 6.65  
[33:10] Using cautious pH adjust  
[33:10] Dispensed 0.000024 mL of Base (0.5 M KOH)  
[33:15] Stepping pH = 6.42  
[33:15] Dispensed 0.000118 mL of Base (0.5 M KOH)  
[33:20] Stepping pH = 8.04

Sample name: **M13\_octanol**  
Assay name: **pH-metric high logP**  
Assay ID: **18C-26010**  
Filename: **C:\Sirius\_T3\Mehtap\20180327\_exp34\_logP\_T3-2\18C-26010\_M13\_octanol\_pH-metric high logP.t3r**

Experiment start time: **3/26/2018 4:16:35 PM**  
Analyst: **Pion**  
Instrument ID: **T312060**

## Experiment Log (continued)

[33:35] Stirrer speed set to 0  
[34:35] Datapoint id 34 collected  
[34:35] Charge balance equation is out by -241.6%  
[34:35] Stirrer speed set to 55  
[34:40] pH 7.57 -> 7.77  
[34:40] Using cautious pH adjust  
[34:40] Dispensed 0.000024 mL of Base (0.5 M KOH)  
[34:45] Stepping pH = 7.53  
[34:45] Dispensed 0.000047 mL of Base (0.5 M KOH)  
[34:51] Stepping pH = 7.84  
[35:06] Stirrer speed set to 0  
[36:06] Datapoint id 35 collected  
[36:06] Charge balance equation is out by -393.8%  
[36:06] Stirrer speed set to 55  
[36:11] pH 7.75 -> 7.95  
[36:11] Using cautious pH adjust  
[36:11] Dispensed 0.000024 mL of Base (0.5 M KOH)  
[36:16] Stepping pH = 7.80  
[36:16] Dispensed 0.000024 mL of Base (0.5 M KOH)  
[36:21] Stepping pH = 8.02  
[36:36] Stirrer speed set to 0  
[37:36] Datapoint id 36 collected  
[37:36] Charge balance equation is out by -332.8%  
[37:36] Stirrer speed set to 55  
[37:41] pH 8.03 -> 8.23  
[37:41] Using cautious pH adjust  
[37:41] Dispensed 0.000024 mL of Base (0.5 M KOH)  
[37:46] Stepping pH = 8.20  
[37:46] Dispensed 0.000024 mL of Base (0.5 M KOH)  
[37:52] Stepping pH = 8.36  
[38:07] Stirrer speed set to 0  
[38:57] Datapoint id 37 collected  
[38:57] Charge balance equation is out by -361.1%  
[38:57] Stirrer speed set to 55  
[39:02] pH 8.24 -> 8.44  
[39:02] Using cautious pH adjust  
[39:02] Dispensed 0.000024 mL of Base (0.5 M KOH)  
[39:07] Stepping pH = 8.35  
[39:07] Dispensed 0.000024 mL of Base (0.5 M KOH)  
[39:13] Stepping pH = 8.60  
[39:28] Stirrer speed set to 0  
[40:02] Datapoint id 38 collected  
[40:02] Charge balance equation is out by -280.6%  
[40:02] Stirrer speed set to 55  
[40:07] pH 8.66 -> 8.86  
[40:07] Using cautious pH adjust  
[40:07] Dispensed 0.000024 mL of Base (0.5 M KOH)  
[40:12] Stepping pH = 8.70  
[40:12] Dispensed 0.000024 mL of Base (0.5 M KOH)  
[40:17] Stepping pH = 8.80  
[40:17] Dispensed 0.000024 mL of Base (0.5 M KOH)  
[40:22] Stepping pH = 8.89  
[40:37] Stirrer speed set to 0  
[41:02] Datapoint id 39 collected  
[41:02] Charge balance equation is out by -172.2%  
[41:02] Stirrer speed set to 55  
[41:07] pH 8.88 -> 9.05  
[41:07] Using cautious pH adjust  
[41:07] Dispensed 0.000024 mL of Base (0.5 M KOH)



Sample name: **M13\_octanol**  
Assay name: **pH-metric high logP**  
Assay ID: **18C-26010**  
Filename: **C:\Sirius\_T3\Mehtap\20180327\_exp34\_logP\_T3-2\18C-26010\_M13\_octanol\_pH-metric high logP.t3r**

Experiment start time: **3/26/2018 4:16:35 PM**  
Analyst: **Pion**  
Instrument ID: **T312060**

## Experiment Log (continued)

[41:12] Stepping pH = 8.90  
[41:12] Dispensed 0.000024 mL of Base (0.5 M KOH)  
[41:17] Stepping pH = 8.98  
[41:17] Dispensed 0.000024 mL of Base (0.5 M KOH)  
[41:22] Stepping pH = 9.07  
[41:37] Stirrer speed set to 0  
[41:56] Datapoint id 40 collected  
[41:56] Charge balance equation is out by -170.5%  
[41:56] Titration 3 of 3  
[41:56] Adding initial titrants  
[41:56] Automatically add 0.70000 mL of Octanol  
[42:44] Dispensed 0.700000 mL of Octanol  
[42:44] Stirrer speed set to 10  
[42:45] Stirrer speed set to 60  
[42:45] Iterative adjust 9.02 -> 2.00  
[42:45] pH 9.02 -> 2.00  
[42:47] Dispensed 0.054727 mL of Acid (0.5 M HCl)  
[42:52] pH 2.03 -> 2.00  
[42:52] Dispensed 0.003175 mL of Acid (0.5 M HCl)  
[43:42] Stirrer speed set to 0  
[43:52] Datapoint id 41 collected  
[43:52] Stirrer speed set to 60  
[43:57] pH 1.96 -> 2.16  
[43:57] Using cautious pH adjust  
[43:58] Dispensed 0.009972 mL of Base (0.5 M KOH)  
[44:03] Stepping pH = 2.05  
[44:03] Dispensed 0.007596 mL of Base (0.5 M KOH)  
[44:08] Stepping pH = 2.14  
[44:08] Dispensed 0.001317 mL of Base (0.5 M KOH)  
[44:13] Stepping pH = 2.16  
[44:28] Stirrer speed set to 0  
[44:39] Datapoint id 42 collected  
[44:39] Charge balance equation is out by 5.2%  
[44:39] Stirrer speed set to 60  
[44:44] pH 2.16 -> 2.36  
[44:44] Using charge balance adjust  
[44:44] Dispensed 0.012817 mL of Base (0.5 M KOH)  
[45:05] Stirrer speed set to 0  
[45:23] Datapoint id 43 collected  
[45:23] Charge balance equation is out by 5.4%  
[45:23] Stirrer speed set to 60  
[45:28] pH 2.38 -> 2.58  
[45:28] Using charge balance adjust  
[45:28] Dispensed 0.007973 mL of Base (0.5 M KOH)  
[45:48] Stirrer speed set to 0  
[45:58] Datapoint id 44 collected  
[45:58] Charge balance equation is out by 3.7%  
[45:58] Stirrer speed set to 60  
[46:03] pH 2.59 -> 2.79  
[46:03] Using charge balance adjust  
[46:04] Dispensed 0.005292 mL of Base (0.5 M KOH)  
[46:24] Stirrer speed set to 0  
[46:34] Datapoint id 45 collected  
[46:34] Charge balance equation is out by 12.0%  
[46:34] Stirrer speed set to 60  
[46:39] pH 2.82 -> 3.02  
[46:39] Using charge balance adjust  
[46:40] Dispensed 0.003575 mL of Base (0.5 M KOH)  
[47:00] Stirrer speed set to 0

Sample name: **M13\_octanol**  
 Assay name: **pH-metric high logP**  
 Assay ID: **18C-26010**  
 Filename: **C:\Sirius\_T3\Mehtap\20180327\_exp34\_logP\_T3-2\18C-26010\_M13\_octanol\_pH-metric high logP.t3r**

Experiment start time: **3/26/2018 4:16:35 PM**  
 Analyst: **Pion**  
 Instrument ID: **T312060**

## Experiment Log (continued)

[47:10] Datapoint id 46 collected  
 [47:10] Charge balance equation is out by -4.8%  
 [47:10] Stirrer speed set to 60  
 [47:15] pH 3.02 -> 3.22  
 [47:15] Using charge balance adjust  
 [47:15] Dispensed 0.002634 mL of Base (0.5 M KOH)  
 [47:35] Stirrer speed set to 0  
 [47:45] Datapoint id 47 collected  
 [47:45] Charge balance equation is out by 7.7%  
 [47:45] Stirrer speed set to 60  
 [47:50] pH 3.25 -> 3.45  
 [47:50] Using charge balance adjust  
 [47:51] Dispensed 0.001881 mL of Base (0.5 M KOH)  
 [48:11] Stirrer speed set to 0  
 [48:21] Datapoint id 48 collected  
 [48:21] Charge balance equation is out by 17.5%  
 [48:21] Stirrer speed set to 60  
 [48:26] pH 3.49 -> 3.69  
 [48:26] Using cautious pH adjust  
 [48:26] Dispensed 0.000635 mL of Base (0.5 M KOH)  
 [48:31] Stepping pH = 3.59  
 [48:31] Dispensed 0.000400 mL of Base (0.5 M KOH)  
 [48:36] Stepping pH = 3.66  
 [48:36] Dispensed 0.000141 mL of Base (0.5 M KOH)  
 [48:41] Stepping pH = 3.68  
 [48:57] Stirrer speed set to 0  
 [49:07] Datapoint id 49 collected  
 [49:07] Charge balance equation is out by 7.9%  
 [49:07] Stirrer speed set to 60  
 [49:12] pH 3.68 -> 3.88  
 [49:12] Using charge balance adjust  
 [49:12] Dispensed 0.000917 mL of Base (0.5 M KOH)  
 [49:32] Stirrer speed set to 0  
 [49:51] Datapoint id 50 collected  
 [49:51] Charge balance equation is out by 2.2%  
 [49:51] Stirrer speed set to 60  
 [49:56] pH 3.90 -> 4.10  
 [49:56] Using charge balance adjust  
 [49:56] Dispensed 0.000588 mL of Base (0.5 M KOH)  
 [50:16] Stirrer speed set to 0  
 [50:28] Datapoint id 51 collected  
 [50:28] Charge balance equation is out by -30.8%  
 [50:28] Stirrer speed set to 60  
 [50:33] pH 4.05 -> 4.25  
 [50:33] Using cautious pH adjust  
 [50:33] Dispensed 0.000212 mL of Base (0.5 M KOH)  
 [50:38] Stepping pH = 4.09  
 [50:38] Dispensed 0.000353 mL of Base (0.5 M KOH)  
 [50:43] Stepping pH = 4.29  
 [50:58] Stirrer speed set to 0  
 [51:08] Datapoint id 52 collected  
 [51:08] Charge balance equation is out by -28.1%  
 [51:08] Stirrer speed set to 60  
 [51:14] pH 4.27 -> 4.47  
 [51:14] Using cautious pH adjust  
 [51:14] Dispensed 0.000141 mL of Base (0.5 M KOH)  
 [51:19] Stepping pH = 4.30  
 [51:19] Dispensed 0.000306 mL of Base (0.5 M KOH)  
 [51:24] Stepping pH = 4.59

Sample name: **M13\_octanol**  
Assay name: **pH-metric high logP**  
Assay ID: **18C-26010**  
Filename: **C:\Sirius\_T3\Mehtap\20180327\_exp34\_logP\_T3-2\18C-26010\_M13\_octanol\_pH-metric high logP.t3r**

Experiment start time: **3/26/2018 4:16:35 PM**  
Analyst: **Pion**  
Instrument ID: **T312060**

## Experiment Log (continued)

[51:39] Stirrer speed set to 0  
[51:49] Datapoint id 53 collected  
[51:49] Charge balance equation is out by -65.4%  
[51:49] Stirrer speed set to 60  
[51:54] pH 4.58 -> 4.78  
[51:54] Using cautious pH adjust  
[51:54] Dispensed 0.000071 mL of Base (0.5 M KOH)  
[51:59] Stepping pH = 4.59  
[51:59] Dispensed 0.000212 mL of Base (0.5 M KOH)  
[52:04] Stepping pH = 4.99  
[52:19] Stirrer speed set to 0  
[52:29] Datapoint id 54 collected  
[52:29] Charge balance equation is out by -96.2%  
[52:29] Stirrer speed set to 60  
[52:35] pH 4.97 -> 5.17  
[52:35] Using cautious pH adjust  
[52:35] Dispensed 0.000024 mL of Base (0.5 M KOH)  
[52:40] Stepping pH = 4.97  
[52:40] Dispensed 0.000094 mL of Base (0.5 M KOH)  
[52:45] Stepping pH = 5.07  
[52:45] Dispensed 0.000047 mL of Base (0.5 M KOH)  
[52:50] Stepping pH = 5.19  
[53:05] Stirrer speed set to 0  
[53:15] Datapoint id 55 collected  
[53:15] Charge balance equation is out by -183.3%  
[53:15] Stirrer speed set to 60  
[53:20] pH 5.19 -> 5.39  
[53:20] Using cautious pH adjust  
[53:20] Dispensed 0.000024 mL of Base (0.5 M KOH)  
[53:25] Stepping pH = 5.20  
[53:25] Dispensed 0.000047 mL of Base (0.5 M KOH)  
[53:31] Stepping pH = 5.35  
[53:31] Dispensed 0.000024 mL of Base (0.5 M KOH)  
[53:36] Stepping pH = 5.46  
[53:51] Stirrer speed set to 0  
[54:01] Datapoint id 56 collected  
[54:01] Charge balance equation is out by -136.9%  
[54:01] Stirrer speed set to 60  
[54:06] pH 5.47 -> 5.67  
[54:06] Using cautious pH adjust  
[54:06] Dispensed 0.000024 mL of Base (0.5 M KOH)  
[54:11] Stepping pH = 5.50  
[54:11] Dispensed 0.000024 mL of Base (0.5 M KOH)  
[54:16] Stepping pH = 5.63  
[54:16] Dispensed 0.000024 mL of Base (0.5 M KOH)  
[54:21] Stepping pH = 5.79  
[54:36] Stirrer speed set to 0  
[54:47] Datapoint id 57 collected  
[54:47] Charge balance equation is out by -142.7%  
[54:47] Stirrer speed set to 60  
[54:52] pH 5.85 -> 6.05  
[54:52] Using cautious pH adjust  
[54:52] Dispensed 0.000024 mL of Base (0.5 M KOH)  
[54:57] Stepping pH = 5.91  
[54:57] Dispensed 0.000024 mL of Base (0.5 M KOH)  
[55:02] Stepping pH = 6.14  
[55:17] Stirrer speed set to 0  
[55:38] Datapoint id 58 collected  
[55:38] Charge balance equation is out by -37.8%

Sample name: **M13\_octanol**  
 Assay name: **pH-metric high logP**  
 Assay ID: **18C-26010**  
 Filename: **C:\Sirius\_T3\Mehtap\20180327\_exp34\_logP\_T3-2\18C-26010\_M13\_octanol\_pH-metric high logP.t3r**

Experiment start time: **3/26/2018 4:16:35 PM**  
 Analyst: **Pion**  
 Instrument ID: **T312060**

## Experiment Log (continued)

[55:38] Stirrer speed set to 60  
 [55:43] pH 6.09 -> 6.29  
 [55:43] Using cautious pH adjust  
 [55:43] Dispensed 0.000024 mL of Base (0.5 M KOH)  
 [55:48] Stepping pH = 6.20  
 [55:48] Dispensed 0.000024 mL of Base (0.5 M KOH)  
 [55:53] Stepping pH = 6.54  
 [56:08] Stirrer speed set to 0  
 [56:42] Datapoint id 59 collected  
 [56:42] Charge balance equation is out by -15.1%  
 [56:42] Stirrer speed set to 60  
 [56:47] pH 6.56 -> 6.76  
 [56:47] Using cautious pH adjust  
 [56:47] Dispensed 0.000024 mL of Base (0.5 M KOH)  
 [56:52] Stepping pH = 6.65  
 [56:52] Dispensed 0.000024 mL of Base (0.5 M KOH)  
 [56:57] Stepping pH = 6.97  
 [57:12] Stirrer speed set to 0  
 [58:11] Datapoint id 60 collected  
 [58:11] Charge balance equation is out by 3.8%  
 [58:11] Stirrer speed set to 60  
 [58:16] pH 6.99 -> 7.19  
 [58:16] Using charge balance adjust  
 [58:17] Dispensed 0.000024 mL of Base (0.5 M KOH)  
 [58:37] Stirrer speed set to 0  
 [59:19] Datapoint id 61 collected  
 [59:19] Charge balance equation is out by -18.2%  
 [59:19] Stirrer speed set to 60  
 [59:24] pH 6.94 -> 7.14  
 [59:24] Using cautious pH adjust  
 [59:24] Dispensed 0.000024 mL of Base (0.5 M KOH)  
 [59:29] Stepping pH = 6.99  
 [59:29] Dispensed 0.000024 mL of Base (0.5 M KOH)  
 [59:34] Stepping pH = 7.34  
 [59:49] Stirrer speed set to 0  
 [1:00:49] Datapoint id 62 collected  
 [1:00:49] Charge balance equation is out by -30.8%  
 [1:00:49] Stirrer speed set to 60  
 [1:00:54] pH 7.34 -> 7.54  
 [1:00:54] Using cautious pH adjust  
 [1:00:55] Dispensed 0.000024 mL of Base (0.5 M KOH)  
 [1:01:00] Stepping pH = 7.38  
 [1:01:00] Dispensed 0.000024 mL of Base (0.5 M KOH)  
 [1:01:05] Stepping pH = 7.84  
 [1:01:20] Stirrer speed set to 0  
 [1:02:20] Datapoint id 63 collected  
 [1:02:20] Charge balance equation is out by -73.9%  
 [1:02:20] Stirrer speed set to 60  
 [1:02:25] pH 7.88 -> 8.08  
 [1:02:25] Using cautious pH adjust  
 [1:02:25] Dispensed 0.000024 mL of Base (0.5 M KOH)  
 [1:02:30] Stepping pH = 7.97  
 [1:02:30] Dispensed 0.000024 mL of Base (0.5 M KOH)  
 [1:02:35] Stepping pH = 8.26  
 [1:02:50] Stirrer speed set to 0  
 [1:03:33] Datapoint id 64 collected  
 [1:03:33] Charge balance equation is out by -237.4%  
 [1:03:33] Stirrer speed set to 60  
 [1:03:38] pH 8.20 -> 8.40

Sample name: **M13\_octanol**  
Assay name: **pH-metric high logP**  
Assay ID: **18C-26010**  
Filename: **C:\Sirius\_T3\Mehtap\20180327\_exp34\_logP\_T3-2\18C-26010\_M13\_octanol\_pH-metric high logP.t3r**

Experiment start time: **3/26/2018 4:16:35 PM**  
Analyst: **Pion**  
Instrument ID: **T312060**

## Experiment Log (continued)

[1:03:38] Using cautious pH adjust  
[1:03:38] Dispensed 0.000024 mL of Base (0.5 M KOH)  
[1:03:43] Stepping pH = 8.28  
[1:03:43] Dispensed 0.000024 mL of Base (0.5 M KOH)  
[1:03:48] Stepping pH = 8.53  
[1:04:03] Stirrer speed set to 0  
[1:04:38] Datapoint id 65 collected  
[1:04:38] Charge balance equation is out by -230.0%  
[1:04:38] Stirrer speed set to 60  
[1:04:43] pH 8.49 -> 8.69  
[1:04:43] Using cautious pH adjust  
[1:04:43] Dispensed 0.000024 mL of Base (0.5 M KOH)  
[1:04:48] Stepping pH = 8.55  
[1:04:48] Dispensed 0.000024 mL of Base (0.5 M KOH)  
[1:04:53] Stepping pH = 8.71  
[1:05:08] Stirrer speed set to 0  
[1:05:37] Datapoint id 66 collected  
[1:05:37] Charge balance equation is out by -127.2%  
[1:05:37] Stirrer speed set to 60  
[1:05:42] pH 8.71 -> 8.91  
[1:05:42] Using cautious pH adjust  
[1:05:42] Dispensed 0.000024 mL of Base (0.5 M KOH)  
[1:05:47] Stepping pH = 8.74  
[1:05:47] Dispensed 0.000024 mL of Base (0.5 M KOH)  
[1:05:53] Stepping pH = 8.87  
[1:05:53] Dispensed 0.000024 mL of Base (0.5 M KOH)  
[1:05:58] Stepping pH = 8.98  
[1:06:13] Stirrer speed set to 0  
[1:06:41] Datapoint id 67 collected  
[1:06:41] Charge balance equation is out by -152.4%  
[1:06:41] Stirrer speed set to 60  
[1:06:46] pH 8.97 -> 9.05  
[1:06:46] Using cautious pH adjust  
[1:06:46] Dispensed 0.000024 mL of Base (0.5 M KOH)  
[1:06:51] Stepping pH = 9.00  
[1:07:06] Stirrer speed set to 0  
[1:07:33] Datapoint id 68 collected  
[1:07:33] Charge balance equation is out by -27.6%  
[1:07:33] Argon flow rate set to 0  
[1:07:37] Titrator arm moved over Titration position  
[1:07:58] The autoloader failed to pick at location "Sample position"
