# Supplementary material for: Octanol-water partition coefficient measurements for the SAMPL6 Blind Prediction Challenge
Source: bioRxiv or medRxiv preprint supplement (doi:10.1101/757393), 2019-12-02
Supplement: Supplementary file [file media-2.zip]

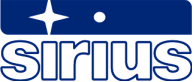

Sample name: **M12\_octanol** Experiment start time: **3/3/2018 7:38:51 PM**  
Assay name: **pH-metric high logP** Analyst: **Pion**  
Assay ID: **18C-03015** Instrument ID: **T312060**  
Filename: **C:\Sirius\_T3\Mehtap\20180302\_exp29\_logP\_T3-2\18C-03015\_M12\_octanol\_pH-metric high logP.t3r**

## pH-metric Result

logP (XH +) 0.40 ±0.06 (n=50)  
logP (neutral X) 3.80 ±0.01 (n=50)

### 18C-03015 Points 1 to 18

M12\_octanol concentration factor 1.084  
Carbonate 0.0827 mM  
Acidity error -3.00593 mM

### 18C-03015 Points 19 to 29

M12\_octanol concentration factor 1.664  
Carbonate 0.1338 mM  
Acidity error -2.74094 mM

### 18C-03015 Points 30 to 56

M12\_octanol concentration factor 0.918  
Carbonate 0.0569 mM  
Acidity error 8.57201 mM

## Warnings and errors

Errors None  
Warnings None

## Sample logD and percent species

| pH     | M12_octanol<br>logD | M12_octanol<br>M12_octanolH | M12_octanol<br>M12_octanol | M12_octanol<br>M12_octanolH* | M12_octanol<br>M12_octanol* | Comment    |
|--------|---------------------|-----------------------------|----------------------------|------------------------------|-----------------------------|------------|
| 1.000  | 0.45                | 26.11 %                     | 0.00 %                     | 65.29 %                      | 8.60 %                      | Stomach pH |
| 1.200  | 0.48                | 24.86 %                     | 0.00 %                     | 62.16 %                      | 12.97 %                     |            |
| 2.000  | 0.76                | 14.72 %                     | 0.01 %                     | 36.81 %                      | 48.46 %                     |            |
| 3.000  | 1.55                | 2.75 %                      | 0.01 %                     | 6.86 %                       | 90.38 %                     |            |
| 4.000  | 2.50                | 0.30 %                      | 0.02 %                     | 0.75 %                       | 98.93 %                     |            |
| 5.000  | 3.33                | 0.03 %                      | 0.02 %                     | 0.08 %                       | 99.88 %                     | Blood pH   |
| 6.000  | 3.72                | 0.00 %                      | 0.02 %                     | 0.01 %                       | 99.97 %                     |            |
| 6.500  | 3.77                | 0.00 %                      | 0.02 %                     | 0.00 %                       | 99.98 %                     |            |
| 7.000  | 3.79                | 0.00 %                      | 0.02 %                     | 0.00 %                       | 99.98 %                     |            |
| 7.400  | 3.79                | 0.00 %                      | 0.02 %                     | 0.00 %                       | 99.98 %                     |            |
| 8.000  | 3.80                | 0.00 %                      | 0.02 %                     | 0.00 %                       | 99.98 %                     |            |
| 9.000  | 3.80                | 0.00 %                      | 0.02 %                     | 0.00 %                       | 99.98 %                     |            |
| 10.000 | 3.80                | 0.00 %                      | 0.02 %                     | 0.00 %                       | 99.98 %                     |            |
| 11.000 | 3.80                | 0.00 %                      | 0.02 %                     | 0.00 %                       | 99.98 %                     |            |
| 12.000 | 3.80                | 0.00 %                      | 0.02 %                     | 0.00 %                       | 99.98 %                     |            |

Sample name: **M12\_octanol**  
 Assay name: **pH-metric high logP**  
 Assay ID: **18C-03015**  
 Filename: **C:\Sirius\_T3\Mehtap\20180302\_exp29\_logP\_T3-2\18C-03015\_M12\_octanol\_pH-metric high logP.t3r**

Experiment start time: **3/3/2018 7:38:51 PM**  
 Analyst: **Pion**  
 Instrument ID: **T312060**

## Graphs

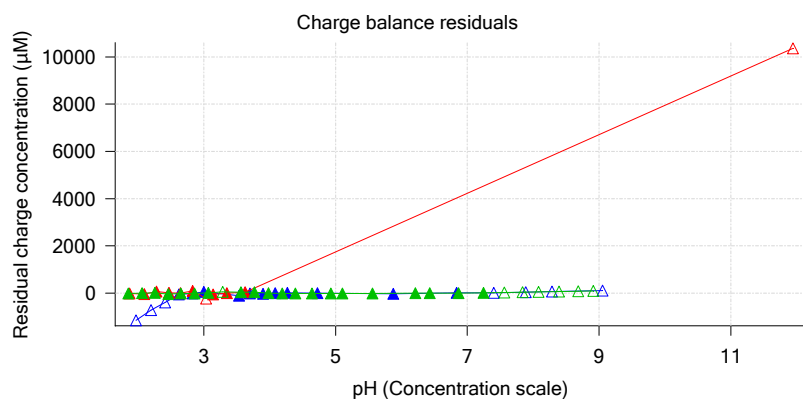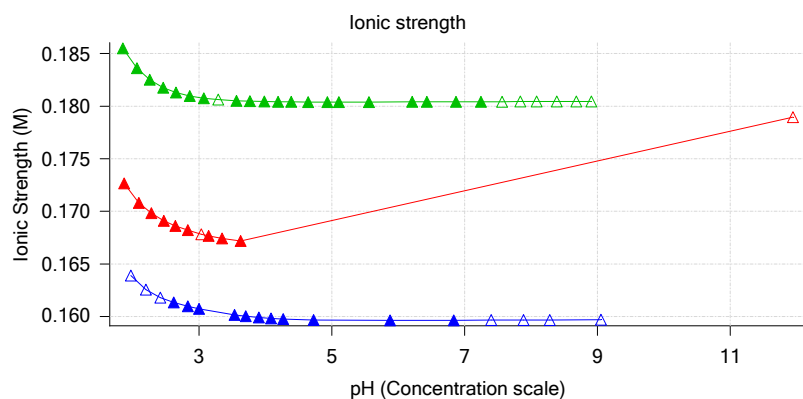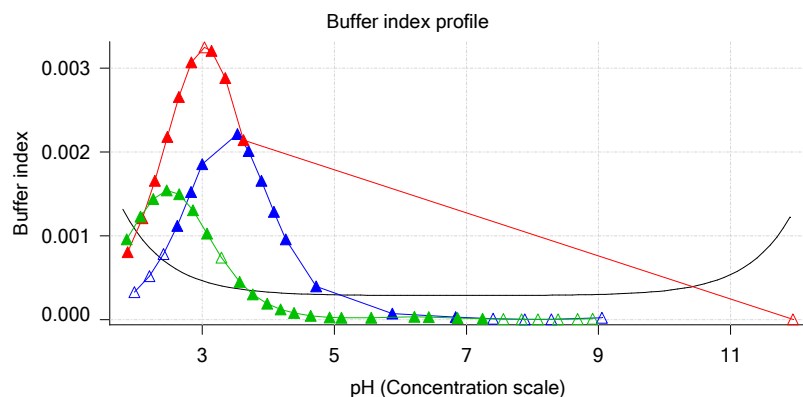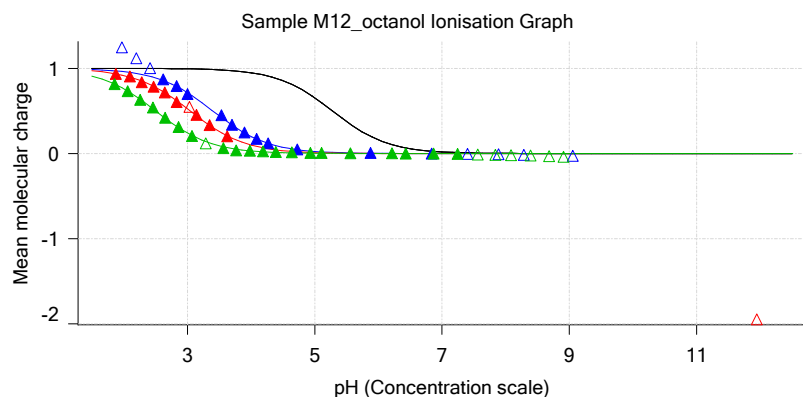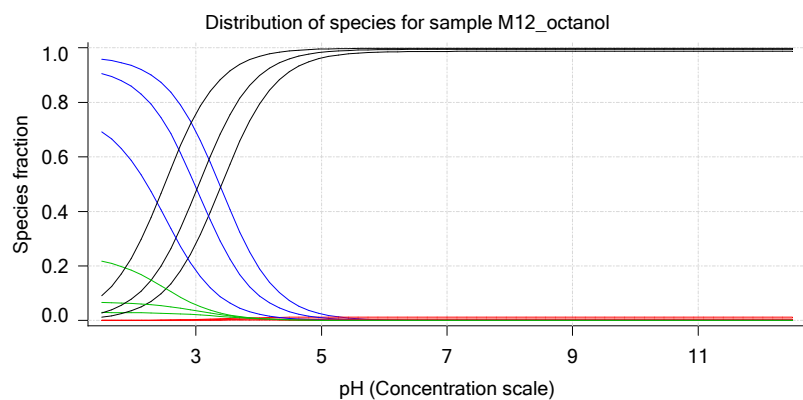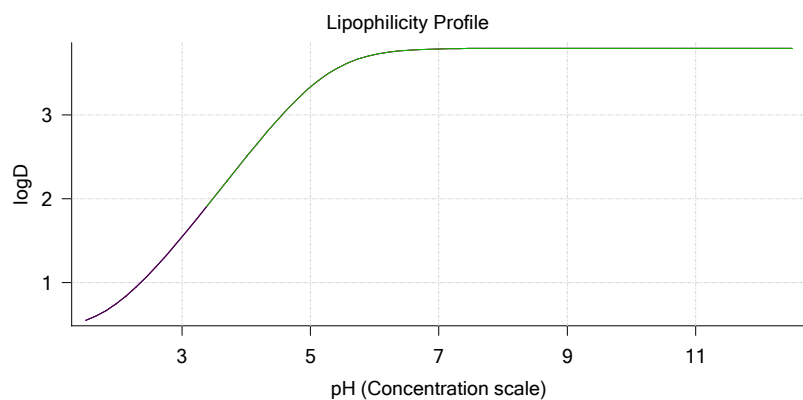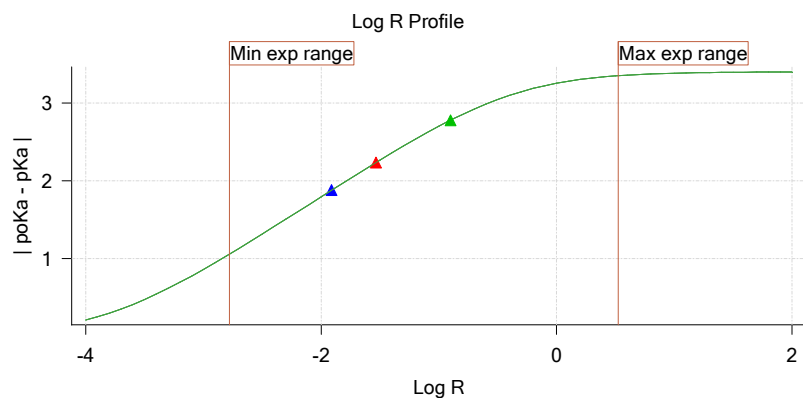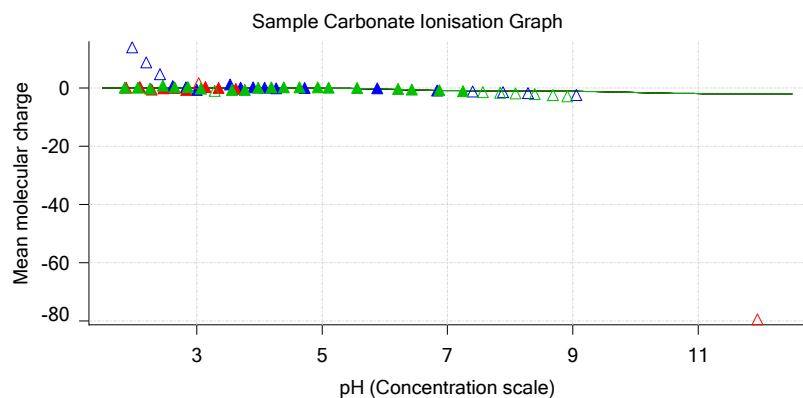

|              |                                                                                                   |                        |                            |
|--------------|---------------------------------------------------------------------------------------------------|------------------------|----------------------------|
| Sample name: | <b>M12_octanol</b>                                                                                | Experiment start time: | <b>3/3/2018 7:38:51 PM</b> |
| Assay name:  | <b>pH-metric high logP</b>                                                                        | Analyst:               | <b>Pion</b>                |
| Assay ID:    | <b>18C-03015</b>                                                                                  | Instrument ID:         | <b>T312060</b>             |
| Filename:    | <b>C:\Sirius_T3\Mehtap\20180302_exp29_logP_T3-2\18C-03015_M12_octanol_pH-metric high logP.t3r</b> |                        |                            |

## Graphs (continued)

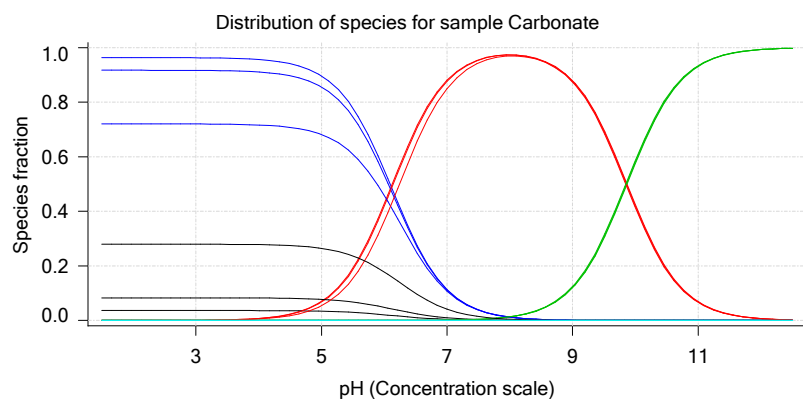

Sample name: **M12\_octanol**  
 Assay name: **pH-metric high logP**  
 Assay ID: **18C-03015**  
 Filename: **C:\Sirius\_T3\Mehtap\20180302\_exp29\_logP\_T3-2\18C-03015\_M12\_octanol\_pH-metric high logP.t3r**

Experiment start time: **3/3/2018 7:38:51 PM**  
 Analyst: **Pion**  
 Instrument ID: **T312060**

pH-metric high logP Titration 1 of 3 18C-03015 Points 1 to 18

## Overall results

RMSD 0.115  
 Average ionic strength 0.160 M  
 Average temperature 24.9°C  
 Partition ratio 0.0123 : 1  
 Analyte concentration range 3571.6 µM to 3683.7 µM  
 Total points considered 11 of 18

## Warnings and errors

Errors None  
 Warnings Excessive acidity error present

## Four-Plus parameters

Alpha 0.111 3/3/2018 7:38:51 PM C:\Sirius\_T3\HCl18C02.t3r  
 S 0.9988 3/3/2018 7:38:51 PM C:\Sirius\_T3\HCl18C02.t3r  
 jH 1.0 3/3/2018 7:38:51 PM C:\Sirius\_T3\HCl18C02.t3r  
 jOH -0.8 3/3/2018 7:38:51 PM C:\Sirius\_T3\HCl18C02.t3r

## Titrants

0.50 M HCl 0.999058 3/3/2018 7:38:51 PM C:\Sirius\_T3\HCl18C02.t3r  
 0.50 M KOH 0.999845 3/3/2018 7:38:51 PM C:\Sirius\_T3\KOH18B27.t3r

## Sample

M12\_octanol concentration factor 1.084  
 M12\_octanol stoichiometry 1.000  
 Chloride stoichiometry 1.000  
 Base pKa 1 5.28  
 logP (XH +) 1.02  
 logP (neutral X) 3.82

## Sample graphs

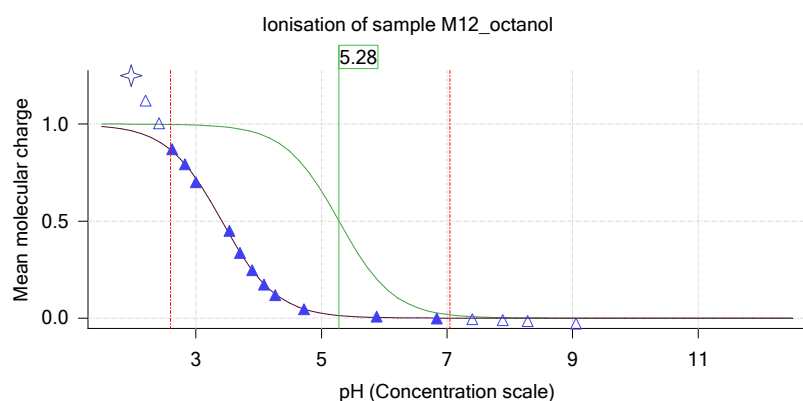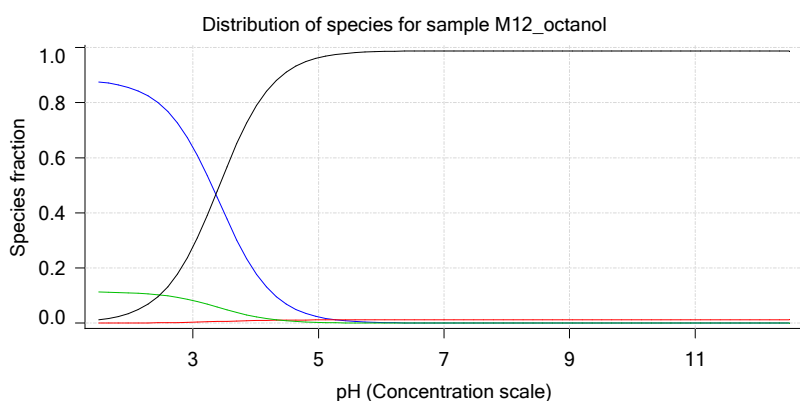

Sample name: **M12\_octanol**  
 Assay name: **pH-metric high logP**  
 Assay ID: **18C-03015**  
 Filename: **C:\Sirius\_T3\Mehtap\20180302\_exp29\_logP\_T3-2\18C-03015\_M12\_octanol\_pH-metric high logP.t3r**

Experiment start time: **3/3/2018 7:38:51 PM**  
 Analyst: **Pion**  
 Instrument ID: **T312060**

## Sample graphs (continued)

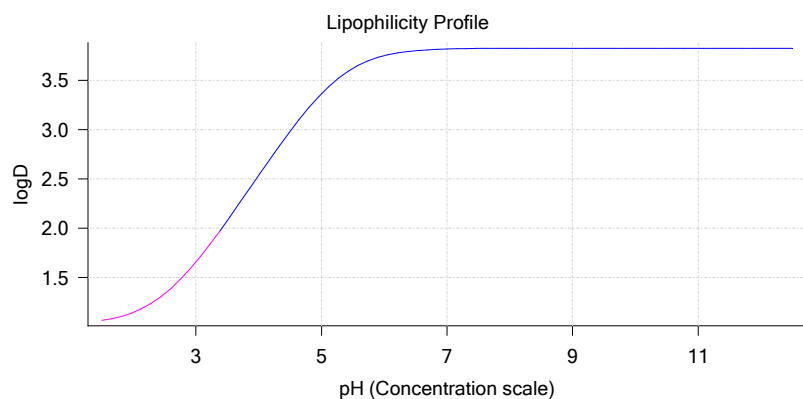

## Sample logD and percent species

| pH     | M12_octanol<br>logD | M12_octanol<br>M12_octanolH | M12_octanol<br>M12_octanol | M12_octanol<br>M12_octanolH* | M12_octanol<br>M12_octanol* | Comment    |
|--------|---------------------|-----------------------------|----------------------------|------------------------------|-----------------------------|------------|
| 1.000  | 1.03                | 88.26 %                     | 0.00 %                     | 11.36 %                      | 0.38 %                      | Stomach pH |
| 1.200  | 1.04                | 88.06 %                     | 0.01 %                     | 11.33 %                      | 0.60 %                      |            |
| 2.000  | 1.15                | 85.31 %                     | 0.04 %                     | 10.98 %                      | 3.67 %                      |            |
| 3.000  | 1.66                | 63.92 %                     | 0.34 %                     | 8.22 %                       | 27.52 %                     |            |
| 4.000  | 2.54                | 18.23 %                     | 0.96 %                     | 2.34 %                       | 78.47 %                     |            |
| 5.000  | 3.36                | 2.24 %                      | 1.17 %                     | 0.29 %                       | 96.30 %                     | Blood pH   |
| 6.000  | 3.75                | 0.23 %                      | 1.20 %                     | 0.03 %                       | 98.54 %                     |            |
| 6.500  | 3.80                | 0.07 %                      | 1.20 %                     | 0.01 %                       | 98.71 %                     |            |
| 7.000  | 3.82                | 0.02 %                      | 1.20 %                     | 0.00 %                       | 98.77 %                     |            |
| 7.400  | 3.82                | 0.01 %                      | 1.20 %                     | 0.00 %                       | 98.79 %                     |            |
| 8.000  | 3.82                | 0.00 %                      | 1.20 %                     | 0.00 %                       | 98.79 %                     |            |
| 9.000  | 3.82                | 0.00 %                      | 1.20 %                     | 0.00 %                       | 98.80 %                     |            |
| 10.000 | 3.82                | 0.00 %                      | 1.20 %                     | 0.00 %                       | 98.80 %                     |            |
| 11.000 | 3.82                | 0.00 %                      | 1.20 %                     | 0.00 %                       | 98.80 %                     |            |
| 12.000 | 3.82                | 0.00 %                      | 1.20 %                     | 0.00 %                       | 98.80 %                     |            |

## Carbonate and acidity

 Carbonate 0.083 mM  
 Acidity error -3.006 mM

## Other graphs

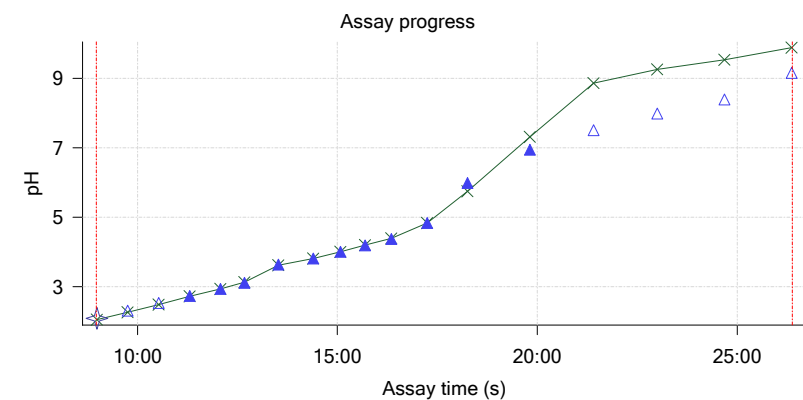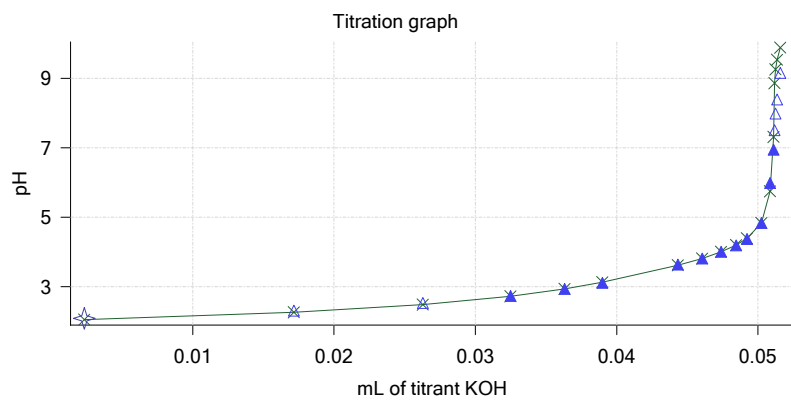

Sample name: **M12\_octanol**  
 Assay name: **pH-metric high logP**  
 Assay ID: **18C-03015**  
 Filename: **C:\Sirius\_T3\Mehtap\20180302\_exp29\_logP\_T3-2\18C-03015\_M12\_octanol\_pH-metric high logP.t3r**

Experiment start time: **3/3/2018 7:38:51 PM**  
 Analyst: **Pion**  
 Instrument ID: **T312060**

## Other graphs (continued)

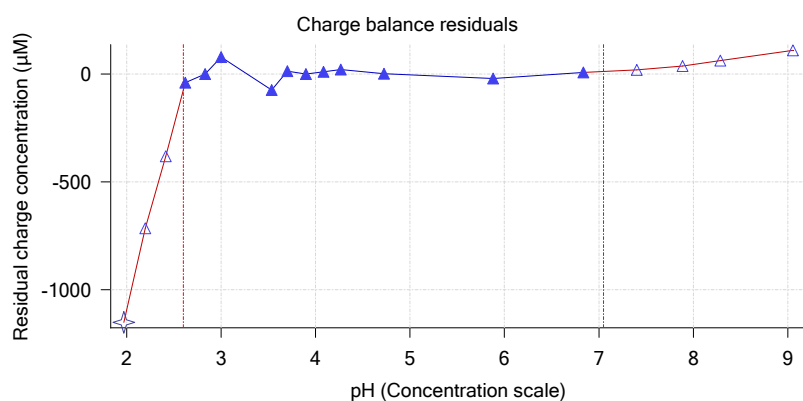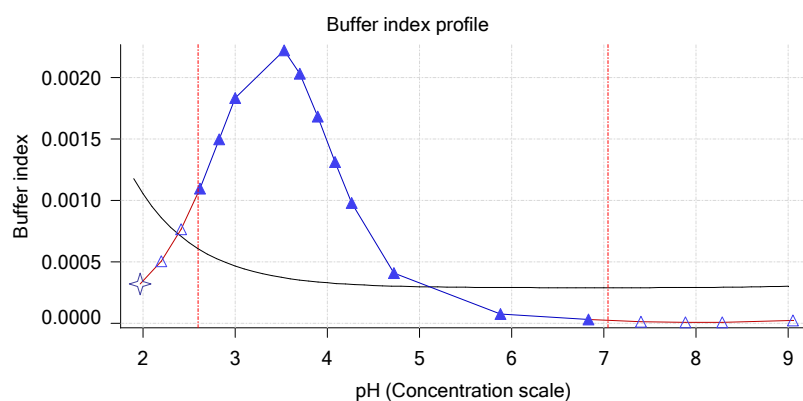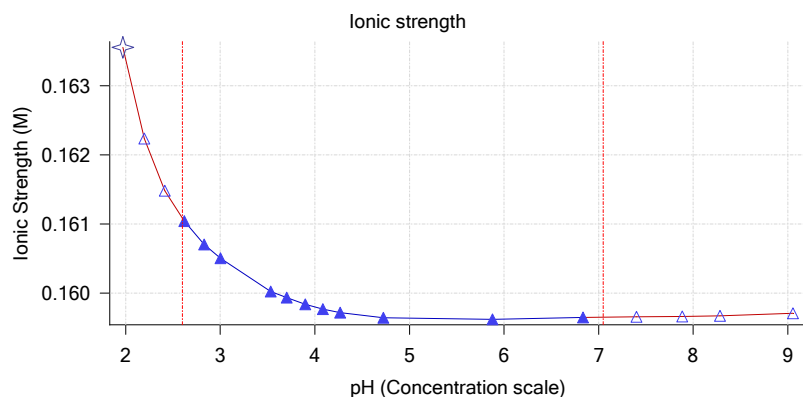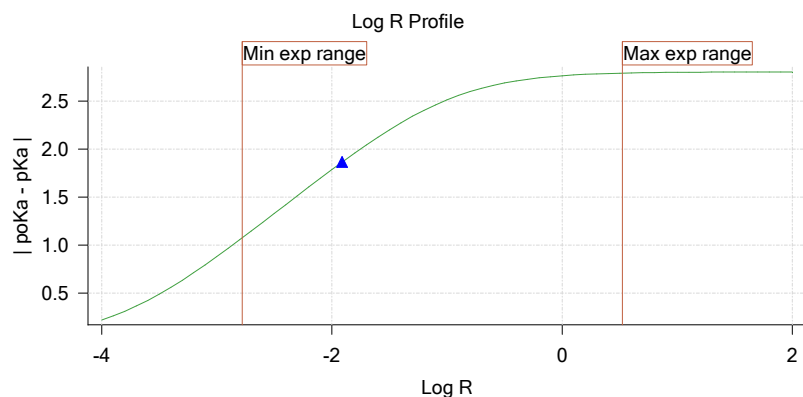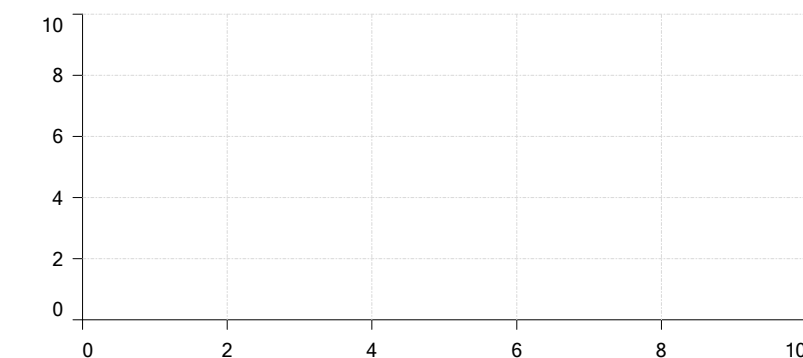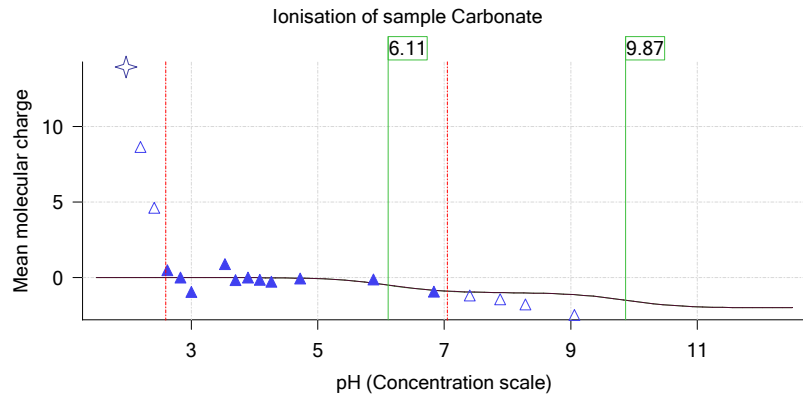

Sample name: **M12\_octanol**  
 Assay name: **pH-metric high logP**  
 Assay ID: **18C-03015**  
 Filename: **C:\Sirius\_T3\Mehtap\20180302\_exp29\_logP\_T3-2\18C-03015\_M12\_octanol\_pH-metric high logP.t3r**

Experiment start time: **3/3/2018 7:38:51 PM**  
 Analyst: **Pion**  
 Instrument ID: **T312060**

## pH-metric high logP Titration 2 of 3 18C-03015 Points 19 to 29

### Overall results

RMSD 0.008  
 Average ionic strength 0.168 M  
 Average temperature 25.0°C  
 Partition ratio 0.0293 : 1  
 Analyte concentration range 3109.3 µM to 3391.7 µM  
 Total points considered 9 of 11

### Warnings and errors

Errors None  
 Warnings Sample concentration factor out of range  
 Excessive acidity error present

### Four-Plus parameters

Alpha 0.111 3/3/2018 7:38:51 PM C:\Sirius\_T3\HCl18C02.t3r  
 S 0.9988 3/3/2018 7:38:51 PM C:\Sirius\_T3\HCl18C02.t3r  
 jH 1.0 3/3/2018 7:38:51 PM C:\Sirius\_T3\HCl18C02.t3r  
 jOH -0.8 3/3/2018 7:38:51 PM C:\Sirius\_T3\HCl18C02.t3r

### Titrants

0.50 M HCl 0.999058 3/3/2018 7:38:51 PM C:\Sirius\_T3\HCl18C02.t3r  
 0.50 M KOH 0.999845 3/3/2018 7:38:51 PM C:\Sirius\_T3\KOH18B27.t3r

### Sample

M12\_octanol concentration factor 1.664  
 M12\_octanol stoichiometry 1.000  
 Chloride stoichiometry 1.000  
 Base pKa 1 5.28  
 logP (XH +) 1.02  
 logP (neutral X) 3.89

### Sample graphs

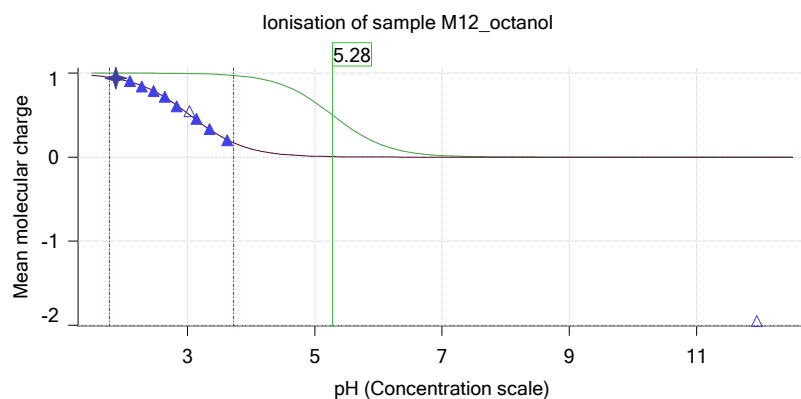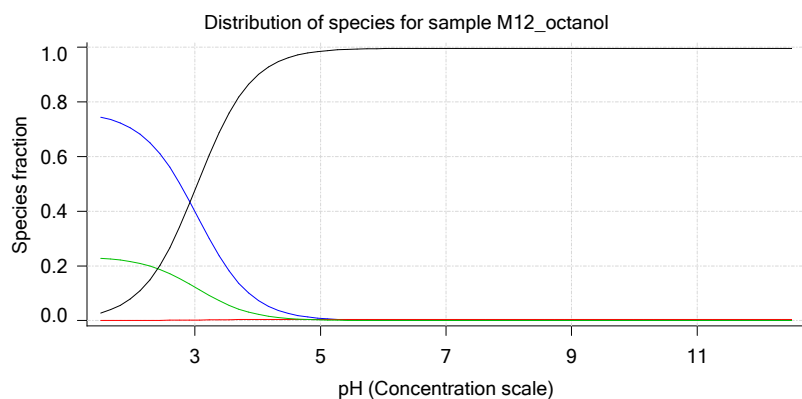

Sample name: **M12\_octanol**  
 Assay name: **pH-metric high logP**  
 Assay ID: **18C-03015**  
 Filename: **C:\Sirius\_T3\Mehtap\20180302\_exp29\_logP\_T3-2\18C-03015\_M12\_octanol\_pH-metric high logP.t3r**

Experiment start time: **3/3/2018 7:38:51 PM**  
 Analyst: **Pion**  
 Instrument ID: **T312060**

## Sample graphs (continued)

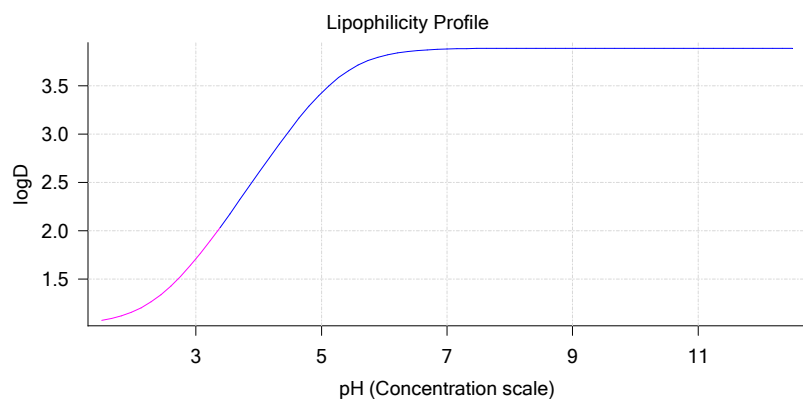

## Sample logD and percent species

| pH     | M12_octanol<br>logD | M12_octanol<br>M12_octanolH | M12_octanol<br>M12_octanolH | M12_octanol<br>M12_octanolH* | M12_octanol<br>M12_octanol* | Comment    |
|--------|---------------------|-----------------------------|-----------------------------|------------------------------|-----------------------------|------------|
| 1.000  | 1.04                | 75.84 %                     | 0.00 %                      | 23.25 %                      | 0.90 %                      | Stomach pH |
| 1.200  | 1.05                | 75.44 %                     | 0.01 %                      | 23.13 %                      | 1.43 %                      |            |
| 2.000  | 1.16                | 70.11 %                     | 0.04 %                      | 21.50 %                      | 8.36 %                      |            |
| 3.000  | 1.71                | 39.94 %                     | 0.21 %                      | 12.25 %                      | 47.60 %                     |            |
| 4.000  | 2.60                | 7.53 %                      | 0.40 %                      | 2.31 %                       | 89.76 %                     |            |
| 5.000  | 3.43                | 0.83 %                      | 0.43 %                      | 0.25 %                       | 98.49 %                     |            |
| 6.000  | 3.81                | 0.08 %                      | 0.44 %                      | 0.03 %                       | 99.45 %                     | Blood pH   |
| 6.500  | 3.86                | 0.03 %                      | 0.44 %                      | 0.01 %                       | 99.53 %                     |            |
| 7.000  | 3.88                | 0.01 %                      | 0.44 %                      | 0.00 %                       | 99.55 %                     |            |
| 7.400  | 3.89                | 0.00 %                      | 0.44 %                      | 0.00 %                       | 99.56 %                     |            |
| 8.000  | 3.89                | 0.00 %                      | 0.44 %                      | 0.00 %                       | 99.56 %                     |            |
| 9.000  | 3.89                | 0.00 %                      | 0.44 %                      | 0.00 %                       | 99.56 %                     |            |
| 10.000 | 3.89                | 0.00 %                      | 0.44 %                      | 0.00 %                       | 99.56 %                     |            |
| 11.000 | 3.89                | 0.00 %                      | 0.44 %                      | 0.00 %                       | 99.56 %                     |            |
| 12.000 | 3.89                | 0.00 %                      | 0.44 %                      | 0.00 %                       | 99.56 %                     |            |

## Carbonate and acidity

 Carbonate 0.134 mM  
 Acidity error -2.741 mM

## Other graphs

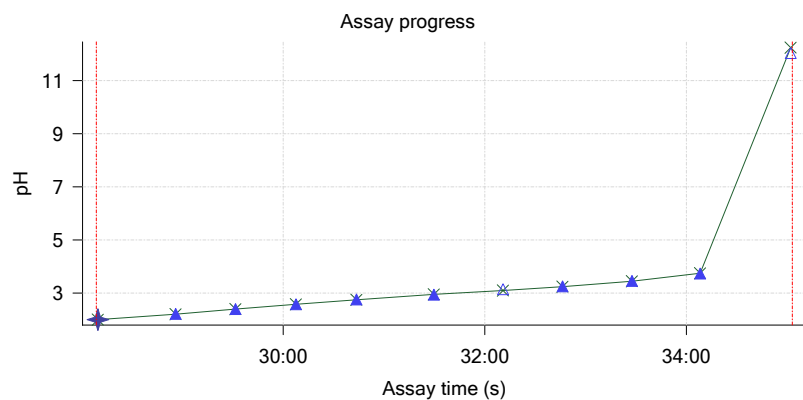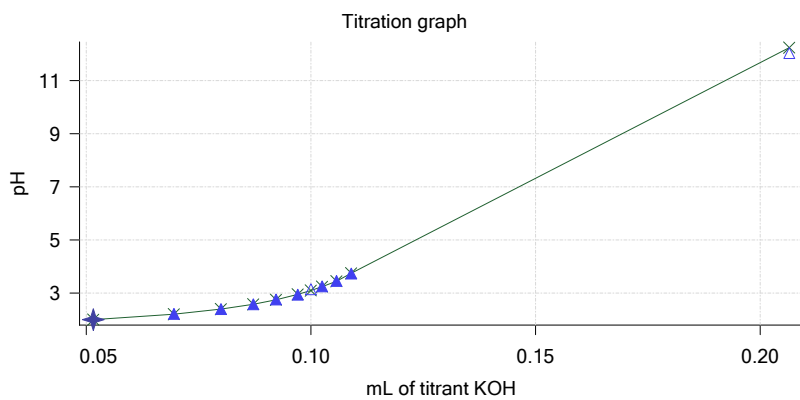



Sample name: **M12\_octanol**  
 Assay name: **pH-metric high logP**  
 Assay ID: **18C-03015**  
 Filename: **C:\Sirius\_T3\Mehtap\20180302\_exp29\_logP\_T3-2\18C-03015\_M12\_octanol\_pH-metric high logP.t3r**

Experiment start time: **3/3/2018 7:38:51 PM**  
 Analyst: **Pion**  
 Instrument ID: **T312060**

## Other graphs (continued)

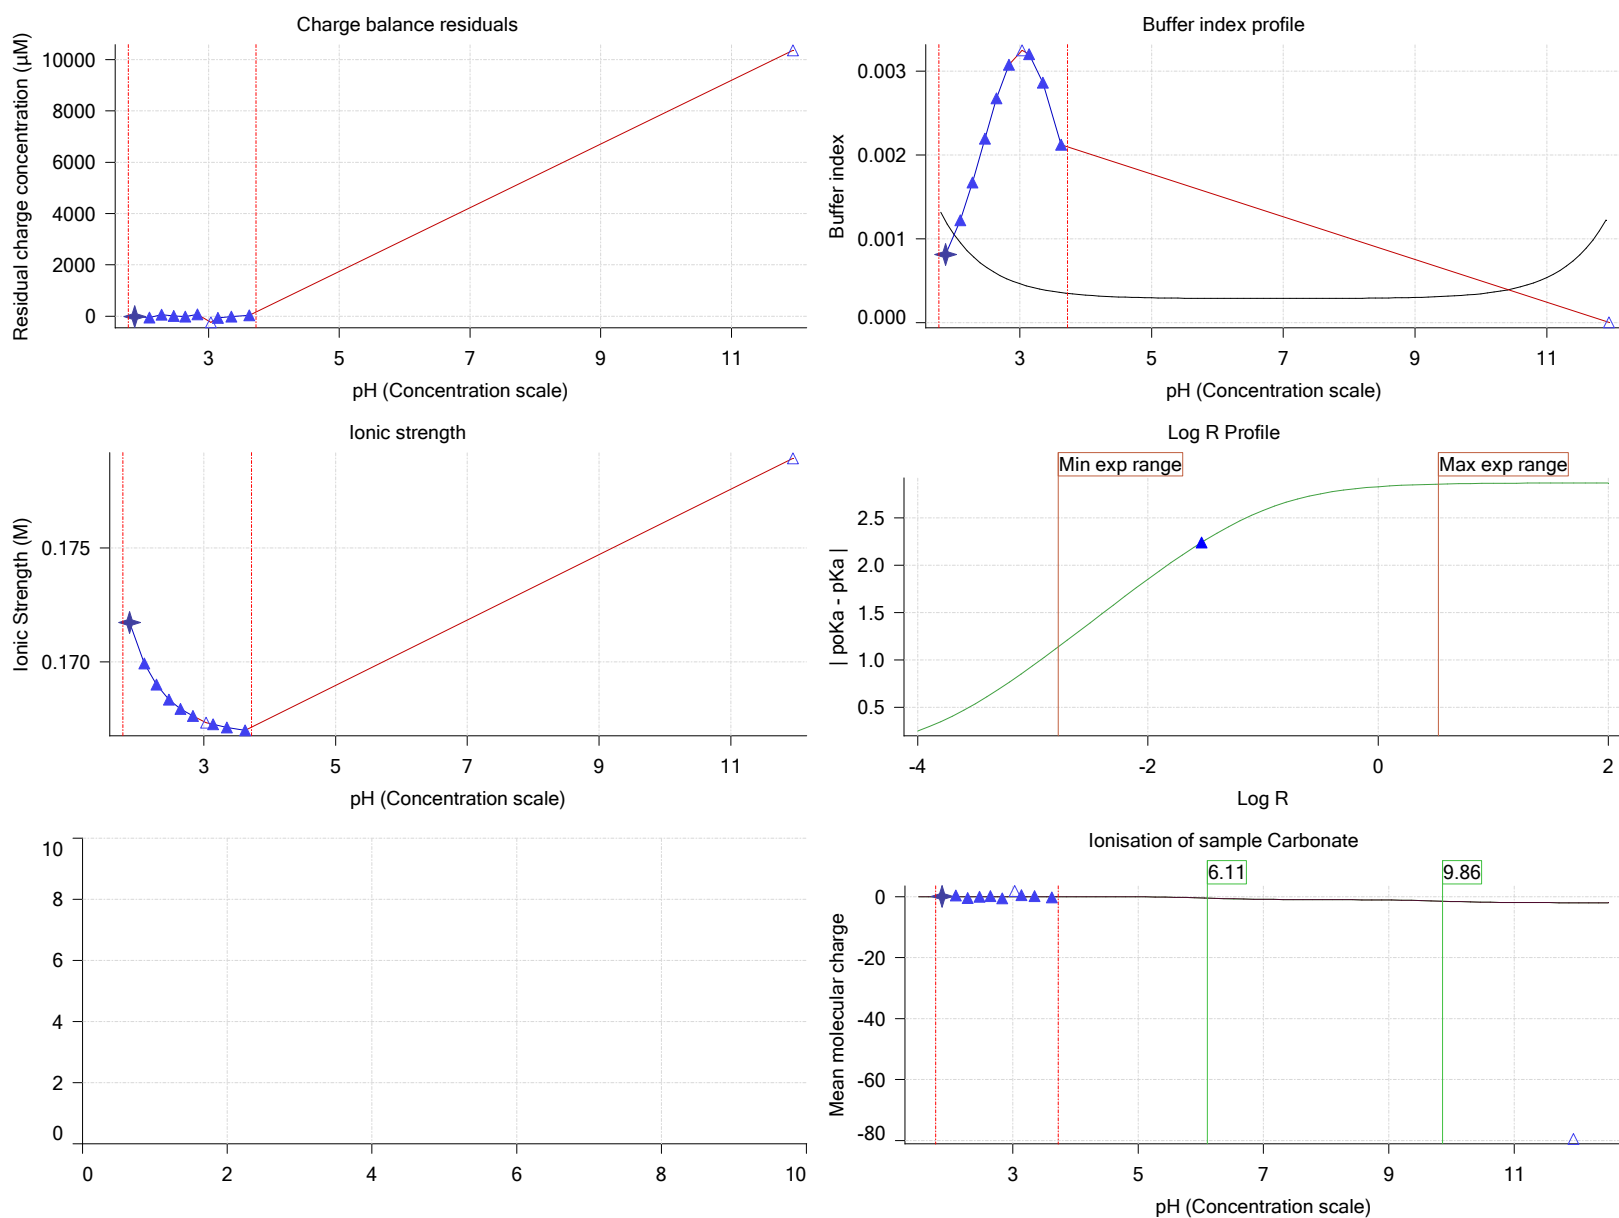

Sample name: **M12\_octanol** Experiment start time: **3/3/2018 7:38:51 PM**  
 Assay name: **pH-metric high logP** Analyst: **Pion**  
 Assay ID: **18C-03015** Instrument ID: **T312060**  
 Filename: **C:\Sirius\_T3\Mehtap\20180302\_exp29\_logP\_T3-2\18C-03015\_M12\_octanol\_pH-metric high logP.t3r**

pH-metric high logP Titration 3 of 3 18C-03015 Points 30 to 56

## Overall results

RMSD 0.199  
 Average ionic strength 0.181 M  
 Average temperature 25.0°C  
 Partition ratio 0.1256 : 1  
 Analyte concentration range 2574.7 µM to 2650.8 µM  
 Total points considered 20 of 27

## Warnings and errors

Errors None  
 Warnings Excessive acidity error present

## Four-Plus parameters

 Alpha 0.111 3/3/2018 7:38:51 PM C:\Sirius\_T3\HCl18C02.t3r  
 S 0.9988 3/3/2018 7:38:51 PM C:\Sirius\_T3\HCl18C02.t3r  
 jH 1.0 3/3/2018 7:38:51 PM C:\Sirius\_T3\HCl18C02.t3r  
 jOH -0.8 3/3/2018 7:38:51 PM C:\Sirius\_T3\HCl18C02.t3r

## Titrants

 0.50 M HCl 0.999058 3/3/2018 7:38:51 PM C:\Sirius\_T3\HCl18C02.t3r  
 0.50 M KOH 0.999845 3/3/2018 7:38:51 PM C:\Sirius\_T3\KOH18B27.t3r

## Sample

 M12\_octanol concentration factor 0.918  
 M12\_octanol stoichiometry 1.000  
 Chloride stoichiometry 1.000  
 Base pKa 1 5.28  
 logP (XH +) 1.02  
 logP (neutral X) 4.04

## Sample graphs

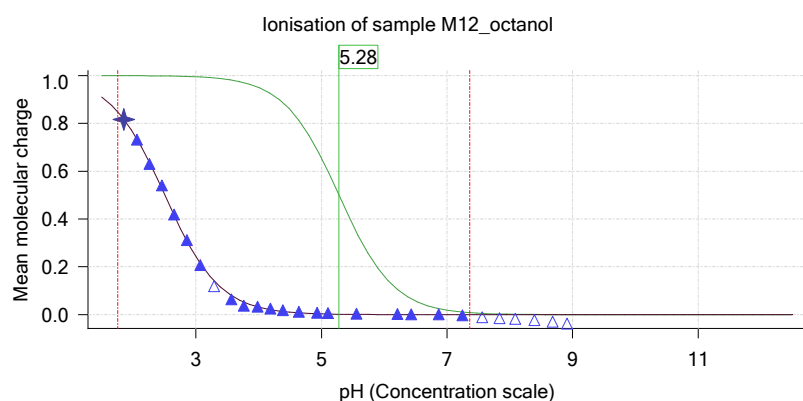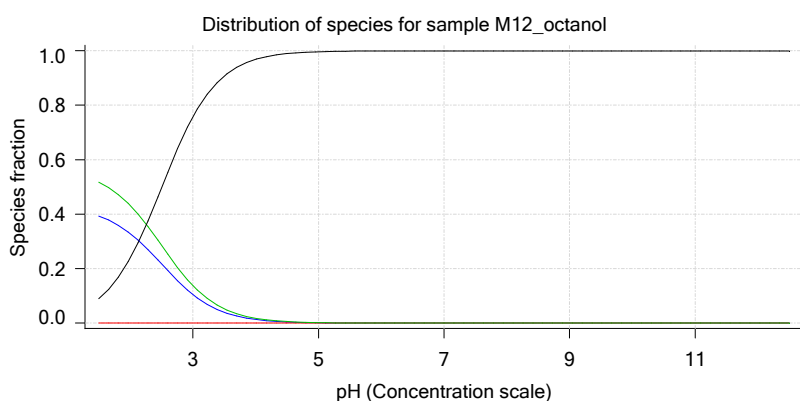

Sample name: **M12\_octanol**  
 Assay name: **pH-metric high logP**  
 Assay ID: **18C-03015**  
 Filename: **C:\Sirius\_T3\Mehtap\20180302\_exp29\_logP\_T3-2\18C-03015\_M12\_octanol\_pH-metric high logP.t3r**

Experiment start time: **3/3/2018 7:38:51 PM**  
 Analyst: **Pion**  
 Instrument ID: **T312060**

## Sample graphs (continued)

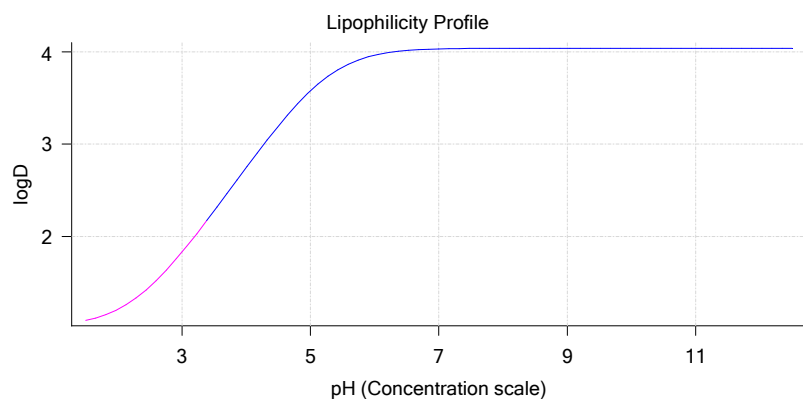

## Sample logD and percent species

| pH     | M12_octanol<br>logD | M12_octanol<br>M12_octanolH | M12_octanol<br>M12_octanolH | M12_octanol<br>M12_octanolH* | M12_octanol<br>M12_octanol* | Comment    |
|--------|---------------------|-----------------------------|-----------------------------|------------------------------|-----------------------------|------------|
| 1.000  | 1.04                | 41.89 %                     | 0.00 %                      | 55.08 %                      | 3.02 %                      | Stomach pH |
| 1.200  | 1.06                | 41.16 %                     | 0.00 %                      | 54.12 %                      | 4.71 %                      |            |
| 2.000  | 1.21                | 32.92 %                     | 0.02 %                      | 43.29 %                      | 23.77 %                     |            |
| 3.000  | 1.83                | 10.48 %                     | 0.06 %                      | 13.78 %                      | 75.68 %                     |            |
| 4.000  | 2.75                | 1.34 %                      | 0.07 %                      | 1.76 %                       | 96.83 %                     |            |
| 5.000  | 3.58                | 0.14 %                      | 0.07 %                      | 0.18 %                       | 99.61 %                     | Blood pH   |
| 6.000  | 3.96                | 0.01 %                      | 0.07 %                      | 0.02 %                       | 99.90 %                     |            |
| 6.500  | 4.01                | 0.00 %                      | 0.07 %                      | 0.01 %                       | 99.92 %                     |            |
| 7.000  | 4.03                | 0.00 %                      | 0.07 %                      | 0.00 %                       | 99.92 %                     |            |
| 7.400  | 4.04                | 0.00 %                      | 0.07 %                      | 0.00 %                       | 99.93 %                     |            |
| 8.000  | 4.04                | 0.00 %                      | 0.07 %                      | 0.00 %                       | 99.93 %                     |            |
| 9.000  | 4.04                | 0.00 %                      | 0.07 %                      | 0.00 %                       | 99.93 %                     |            |
| 10.000 | 4.04                | 0.00 %                      | 0.07 %                      | 0.00 %                       | 99.93 %                     |            |
| 11.000 | 4.04                | 0.00 %                      | 0.07 %                      | 0.00 %                       | 99.93 %                     |            |
| 12.000 | 4.04                | 0.00 %                      | 0.07 %                      | 0.00 %                       | 99.93 %                     |            |

## Carbonate and acidity

Carbonate 0.057 mM  
 Acidity error 8.572 mM

## Other graphs

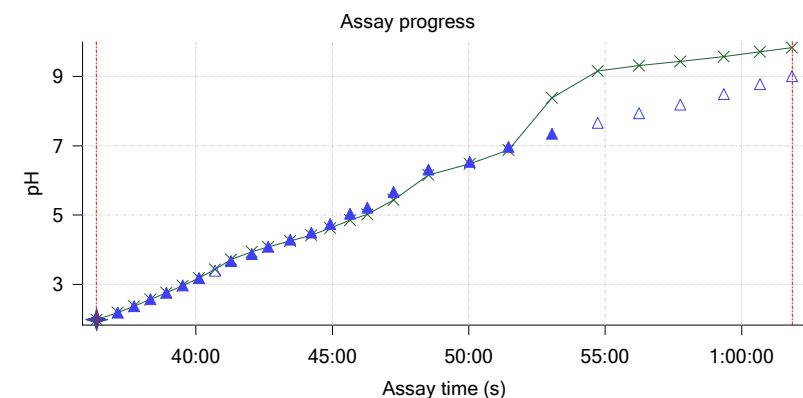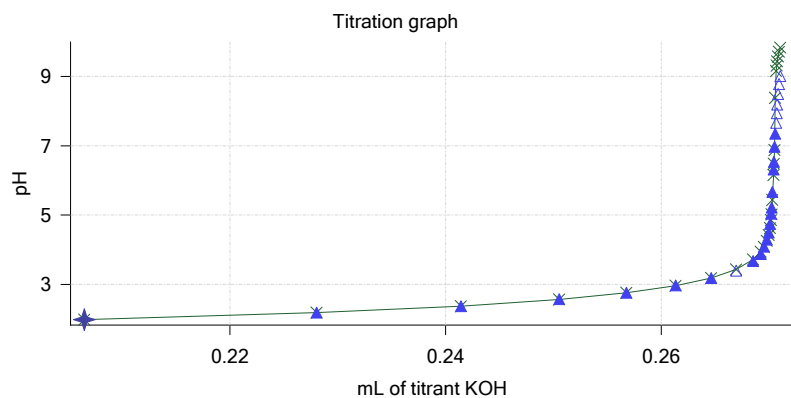

Sample name: **M12\_octanol**  
 Assay name: **pH-metric high logP**  
 Assay ID: **18C-03015**  
 Filename: **C:\Sirius\_T3\Mehtap\20180302\_exp29\_logP\_T3-2\18C-03015\_M12\_octanol\_pH-metric high logP.t3r**

Experiment start time: **3/3/2018 7:38:51 PM**  
 Analyst: **Pion**  
 Instrument ID: **T312060**

## Other graphs (continued)

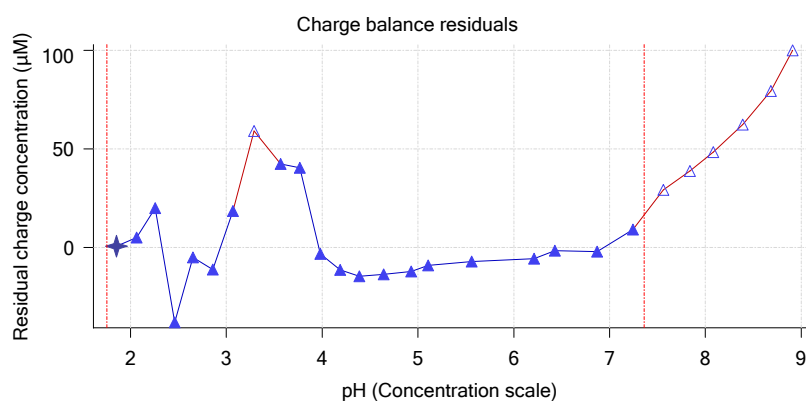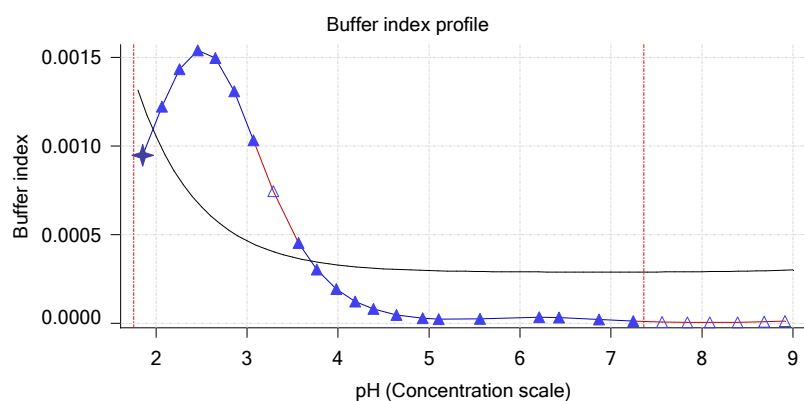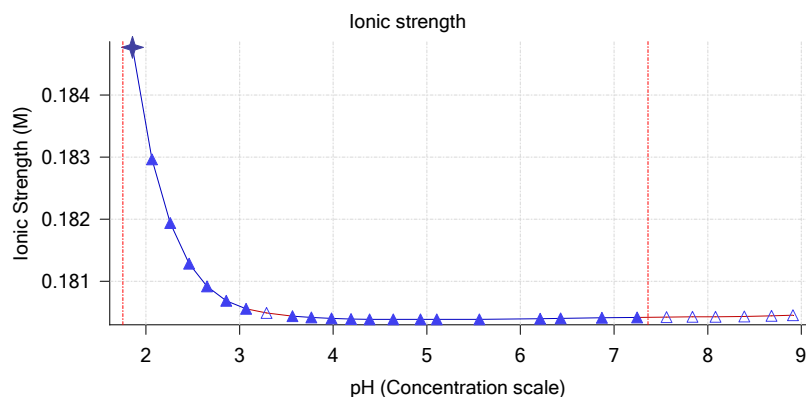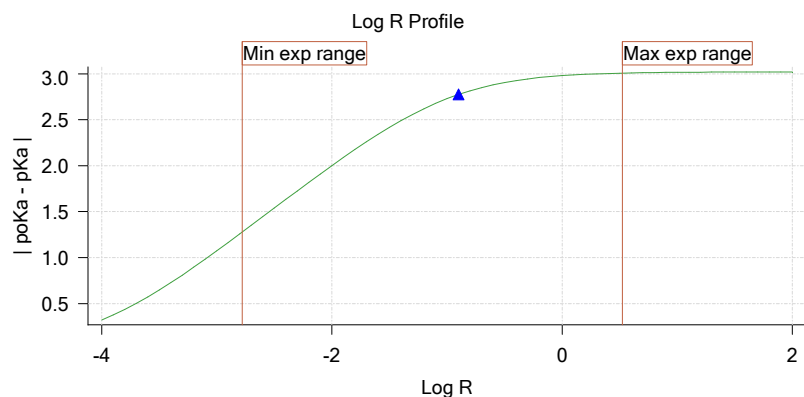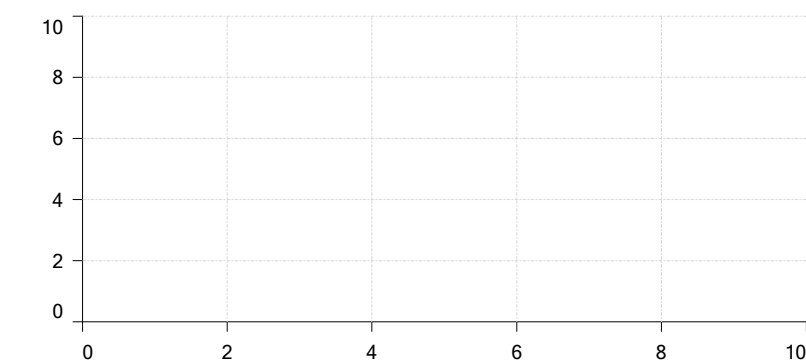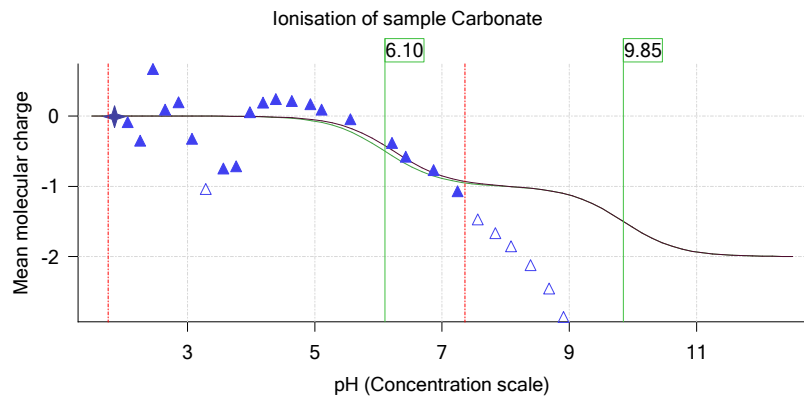

Sample name: **M12\_octanol**  
 Assay name: **pH-metric high logP**  
 Assay ID: **18C-03015**  
 Filename: **C:\Sirius\_T3\Mehtap\20180302\_exp29\_logP\_T3-2\18C-03015\_M12\_octanol\_pH-metric high logP.t3r**

Experiment start time: **3/3/2018 7:38:51 PM**  
 Analyst: **Pion**  
 Instrument ID: **T312060**

## Assay Model

| Settings                          | Value        | Date/Time changed    | Imported from           |
|-----------------------------------|--------------|----------------------|-------------------------|
| Sample name                       | M12_octanol  | 2/28/2018 2:58:36 PM | User entered value      |
| Sample by                         | Weight       |                      | Default value           |
| Sample weight                     | 0.001690 g   | 3/2/2018 5:10:33 PM  | User entered value      |
| Formula weight                    | 292.16 g/mol | 2/28/2018 2:58:36 PM | User entered value      |
| Solubility                        | Unknown      |                      | Default value           |
| Molecular weight                  | 255.70       | 2/28/2018 2:58:36 PM | User entered value      |
| Individual pKa ionic environments | No           |                      | Default value           |
| Number of pKas                    | 1            | 2/28/2018 2:58:36 PM | User entered value      |
| Sample is a                       | Base         | 2/28/2018 2:58:36 PM | User entered value      |
| pKa 1                             | 5.28         | 2/28/2018 2:58:36 PM | User entered value      |
| logp (XH +)                       | 1.02         | 3/2/2018 3:44:28 PM  | User entered value      |
| logP (neutral X)                  | 3.79         | 3/2/2018 3:44:35 PM  | User entered value      |
| Stoichiometry                     | 1.00000      |                      | Default value           |
| Aprotic counterion name           | Chloride     |                      | From standards.xml file |
| Stoichiometry                     | 1.00         |                      | From standards.xml file |
| Charge per counterion             | -1           |                      | From standards.xml file |

## Events

| Time    | Event             | Water      | Acid       | Base       | Octanol    | pH     | dpH/dt   | pH R-squared | pH SD   | dpH/dt time         |
|---------|-------------------|------------|------------|------------|------------|--------|----------|--------------|---------|---------------------|
| 5:59.8  | Initial pH = 4.05 |            |            |            |            |        |          |              |         |                     |
| 8:59.2  | Data point 1      | 1.50000 mL | 0.04798 mL | 0.00233 mL | 0.01999 mL | 2.090  | -0.00070 | 0.00914      | 0.00036 | 10.0 s              |
| 9:45.4  | Data point 2      | 1.50000 mL | 0.04798 mL | 0.01717 mL | 0.01999 mL | 2.312  | -0.00312 | 0.68871      | 0.00019 | 10.5 s              |
| 10:31.9 | Data point 3      | 1.50000 mL | 0.04798 mL | 0.02629 mL | 0.01999 mL | 2.526  | 0.00243  | 0.06275      | 0.00048 | 10.5 s              |
| 11:18.4 | Data point 4      | 1.50000 mL | 0.04798 mL | 0.03248 mL | 0.01999 mL | 2.730  | -0.00626 | 0.82301      | 0.00034 | 10.0 s              |
| 12:04.3 | Data point 5      | 1.50000 mL | 0.04798 mL | 0.03631 mL | 0.01999 mL | 2.938  | -0.00734 | 0.94317      | 0.00037 | 10.5 s              |
| 12:40.3 | Data point 6      | 1.50000 mL | 0.04798 mL | 0.03899 mL | 0.01999 mL | 3.110  | -0.01187 | 0.90433      | 0.00062 | 10.0 s              |
| 13:31.5 | Data point 7      | 1.50000 mL | 0.04798 mL | 0.04433 mL | 0.01999 mL | 3.640  | -0.01726 | 0.73640      | 0.00099 | 11.5 s              |
| 14:23.9 | Data point 8      | 1.50000 mL | 0.04798 mL | 0.04605 mL | 0.01999 mL | 3.809  | -0.01938 | 0.96322      | 0.00098 | 15.0 s              |
| 15:04.4 | Data point 9      | 1.50000 mL | 0.04798 mL | 0.04739 mL | 0.01999 mL | 4.005  | -0.01944 | 0.95579      | 0.00098 | 12.0 s              |
| 15:41.8 | Data point 10     | 1.50000 mL | 0.04798 mL | 0.04845 mL | 0.01999 mL | 4.191  | -0.01847 | 0.88746      | 0.00097 | 13.5 s              |
| 16:20.8 | Data point 11     | 1.50000 mL | 0.04798 mL | 0.04922 mL | 0.01999 mL | 4.372  | -0.01878 | 0.94552      | 0.00095 | 23.5 s              |
| 17:14.9 | Data point 12     | 1.50000 mL | 0.04798 mL | 0.05024 mL | 0.01999 mL | 4.829  | -0.01888 | 0.96108      | 0.00095 | 30.0 s              |
| 18:15.5 | Data point 13     | 1.50000 mL | 0.04798 mL | 0.05085 mL | 0.01999 mL | 5.982  | -0.01949 | 0.93892      | 0.00099 | 52.5 s              |
| 19:49.0 | Data point 14     | 1.50000 mL | 0.04798 mL | 0.05111 mL | 0.01999 mL | 6.938  | -0.03568 | 0.99301      | 0.00177 | Timed out at 59.5 s |
| 21:24.6 | Data point 15     | 1.50000 mL | 0.04798 mL | 0.05118 mL | 0.01999 mL | 7.503  | -0.03856 | 0.98751      | 0.00192 | Timed out at 59.5 s |
| 23:00.2 | Data point 16     | 1.50000 mL | 0.04798 mL | 0.05125 mL | 0.01999 mL | 7.986  | -0.04249 | 0.99373      | 0.00210 | Timed out at 59.5 s |
| 24:41.0 | Data point 17     | 1.50000 mL | 0.04798 mL | 0.05134 mL | 0.01999 mL | 8.384  | -0.03068 | 0.99526      | 0.00152 | Timed out at 59.5 s |
| 26:21.7 | Data point 18     | 1.50000 mL | 0.04798 mL | 0.05158 mL | 0.01999 mL | 9.153  | -0.01970 | 0.96174      | 0.00099 | 49.0 s              |
| 28:09.7 | Data point 19     | 1.50000 mL | 0.10388 mL | 0.05158 mL | 0.05000 mL | 1.995  | -0.00675 | 0.60729      | 0.00043 | 10.0 s              |
| 28:55.9 | Data point 20     | 1.50000 mL | 0.10388 mL | 0.06954 mL | 0.05000 mL | 2.211  | -0.00301 | 0.08351      | 0.00051 | 10.0 s              |
| 29:31.6 | Data point 21     | 1.50000 mL | 0.10388 mL | 0.08001 mL | 0.05000 mL | 2.394  | 0.00217  | 0.25971      | 0.00021 | 10.5 s              |
| 30:07.6 | Data point 22     | 1.50000 mL | 0.10388 mL | 0.08718 mL | 0.05000 mL | 2.582  | 0.01006  | 0.35818      | 0.00083 | 10.5 s              |
| 30:43.7 | Data point 23     | 1.50000 mL | 0.10388 mL | 0.09226 mL | 0.05000 mL | 2.754  | -0.00412 | 0.68848      | 0.00025 | 10.0 s              |
| 31:29.7 | Data point 24     | 1.50000 mL | 0.10388 mL | 0.09711 mL | 0.05000 mL | 2.942  | -0.00701 | 0.24786      | 0.00069 | 10.5 s              |
| 32:10.9 | Data point 25     | 1.50000 mL | 0.10388 mL | 0.10002 mL | 0.05000 mL | 3.142  | -0.00388 | 0.12360      | 0.00054 | 10.0 s              |
| 32:46.3 | Data point 26     | 1.50000 mL | 0.10388 mL | 0.10249 mL | 0.05000 mL | 3.250  | -0.00583 | 0.78197      | 0.00033 | 10.5 s              |
| 33:27.5 | Data point 27     | 1.50000 mL | 0.10388 mL | 0.10574 mL | 0.05000 mL | 3.456  | -0.01149 | 0.59025      | 0.00074 | 10.0 s              |
| 34:08.3 | Data point 28     | 1.50000 mL | 0.10388 mL | 0.10898 mL | 0.05000 mL | 3.732  | 0.00666  | 0.19651      | 0.00074 | 10.5 s              |
| 35:02.1 | Data point 29     | 1.50000 mL | 0.10388 mL | 0.20652 mL | 0.05000 mL | 12.026 | 0.00788  | 0.91250      | 0.00041 | 10.5 s              |
| 36:22.1 | Data point 30     | 1.50000 mL | 0.22564 mL | 0.20652 mL | 0.25000 mL | 1.977  | -0.01444 | 0.92481      | 0.00074 | 10.0 s              |
| 37:08.5 | Data point 31     | 1.50000 mL | 0.22564 mL | 0.22803 mL | 0.25000 mL | 2.180  | -0.00826 | 0.64596      | 0.00051 | 10.0 s              |
| 37:44.3 | Data point 32     | 1.50000 mL | 0.22564 mL | 0.24142 mL | 0.25000 mL | 2.372  | -0.00705 | 0.53601      | 0.00048 | 10.0 s              |



## Assay Events

Sample name: **M12\_octanol**  
Assay name: **pH-metric high logP**  
Assay ID: **18C-03015**  
Filename: **C:\Sirius\_T3\Mehtap\20180302\_exp29\_logP\_T3-2\18C-03015\_M12\_octanol\_pH-metric high logP.t3r**

Experiment start time: **3/3/2018 7:38:51 PM**  
Analyst: **Pion**  
Instrument ID: **T312060**

## Events (continued)

| Time      | Event         | Water      | Acid       | Base       | Octanol    | pH    | dpH/dt   | pH R-squared | pH SD   | dpH/dt time         |
|-----------|---------------|------------|------------|------------|------------|-------|----------|--------------|---------|---------------------|
| 38:19.9   | Data point 33 | 1.50000 mL | 0.22564 mL | 0.25052 mL | 0.25000 mL | 2.571 | -0.00201 | 0.05339      | 0.00043 | 10.0 s              |
| 38:55.5   | Data point 34 | 1.50000 mL | 0.22564 mL | 0.25677 mL | 0.25000 mL | 2.761 | -0.00400 | 0.13797      | 0.00053 | 10.0 s              |
| 39:31.1   | Data point 35 | 1.50000 mL | 0.22564 mL | 0.26134 mL | 0.25000 mL | 2.967 | -0.00538 | 0.70571      | 0.00032 | 10.0 s              |
| 40:06.6   | Data point 36 | 1.50000 mL | 0.22564 mL | 0.26463 mL | 0.25000 mL | 3.179 | -0.00342 | 0.11319      | 0.00050 | 10.0 s              |
| 40:42.1   | Data point 37 | 1.50000 mL | 0.22564 mL | 0.26693 mL | 0.25000 mL | 3.396 | -0.00748 | 0.56380      | 0.00049 | 10.0 s              |
| 41:17.6   | Data point 38 | 1.50000 mL | 0.22564 mL | 0.26851 mL | 0.25000 mL | 3.672 | -0.00209 | 0.04091      | 0.00051 | 10.0 s              |
| 42:03.3   | Data point 39 | 1.50000 mL | 0.22564 mL | 0.26921 mL | 0.25000 mL | 3.873 | -0.00392 | 0.08581      | 0.00066 | 10.0 s              |
| 42:38.7   | Data point 40 | 1.50000 mL | 0.22564 mL | 0.26952 mL | 0.25000 mL | 4.087 | -0.00077 | 0.00175      | 0.00091 | 18.0 s              |
| 43:27.2   | Data point 41 | 1.50000 mL | 0.22564 mL | 0.26978 mL | 0.25000 mL | 4.294 | -0.00113 | 0.00401      | 0.00088 | 10.5 s              |
| 44:13.6   | Data point 42 | 1.50000 mL | 0.22564 mL | 0.26994 mL | 0.25000 mL | 4.494 | -0.00826 | 0.23363      | 0.00084 | 11.0 s              |
| 44:55.1   | Data point 43 | 1.50000 mL | 0.22564 mL | 0.27009 mL | 0.25000 mL | 4.746 | -0.01490 | 0.56284      | 0.00098 | 18.5 s              |
| 45:39.0   | Data point 44 | 1.50000 mL | 0.22564 mL | 0.27018 mL | 0.25000 mL | 5.035 | -0.01117 | 0.33968      | 0.00095 | 12.5 s              |
| 46:16.9   | Data point 45 | 1.50000 mL | 0.22564 mL | 0.27023 mL | 0.25000 mL | 5.210 | -0.01900 | 0.90187      | 0.00099 | 27.5 s              |
| 47:14.9   | Data point 46 | 1.50000 mL | 0.22564 mL | 0.27030 mL | 0.25000 mL | 5.664 | -0.01760 | 0.93799      | 0.00090 | 46.0 s              |
| 48:31.5   | Data point 47 | 1.50000 mL | 0.22564 mL | 0.27039 mL | 0.25000 mL | 6.314 | -0.03485 | 0.93285      | 0.00178 | Timed out at 59.5 s |
| 50:02.1   | Data point 48 | 1.50000 mL | 0.22564 mL | 0.27044 mL | 0.25000 mL | 6.532 | -0.03321 | 0.95029      | 0.00168 | Timed out at 59.5 s |
| 51:27.4   | Data point 49 | 1.50000 mL | 0.22564 mL | 0.27048 mL | 0.25000 mL | 6.971 | -0.05095 | 0.98242      | 0.00254 | Timed out at 59.5 s |
| 53:03.0   | Data point 50 | 1.50000 mL | 0.22564 mL | 0.27055 mL | 0.25000 mL | 7.347 | -0.06715 | 0.99206      | 0.00333 | Timed out at 59.5 s |
| 54:43.9   | Data point 51 | 1.50000 mL | 0.22564 mL | 0.27065 mL | 0.25000 mL | 7.663 | -0.06618 | 0.98872      | 0.00329 | Timed out at 59.5 s |
| 56:14.4   | Data point 52 | 1.50000 mL | 0.22564 mL | 0.27070 mL | 0.25000 mL | 7.938 | -0.05473 | 0.99204      | 0.00271 | Timed out at 59.5 s |
| 57:44.9   | Data point 53 | 1.50000 mL | 0.22564 mL | 0.27074 mL | 0.25000 mL | 8.184 | -0.04284 | 0.94491      | 0.00218 | Timed out at 59.5 s |
| 59:20.6   | Data point 54 | 1.50000 mL | 0.22564 mL | 0.27081 mL | 0.25000 mL | 8.490 | -0.00848 | 0.37648      | 0.00068 | 38.5 s              |
| 1:00:40.1 | Data point 55 | 1.50000 mL | 0.22564 mL | 0.27091 mL | 0.25000 mL | 8.782 | -0.00488 | 0.07901      | 0.00086 | 29.5 s              |
| 1:01:50.4 | Data point 56 | 1.50000 mL | 0.22564 mL | 0.27103 mL | 0.25000 mL | 9.009 | -0.01631 | 0.80065      | 0.00090 | 14.5 s              |
| 1:02:13.9 | Assay volumes | 1.50000 mL | 0.22564 mL | 0.27103 mL | 0.25000 mL |       |          |              |         |                     |

Sample name: **M12\_octanol**  
 Assay name: **pH-metric high logP**  
 Assay ID: **18C-03015**  
 Filename: **C:\Sirius\_T3\Mehtap\20180302\_exp29\_logP\_T3-2\18C-03015\_M12\_octanol\_pH-metric high logP.t3r**

Experiment start time: **3/3/2018 7:38:51 PM**  
 Analyst: **Pion**  
 Instrument ID: **T312060**

## Assay Settings

| Setting                             | Value              | Original Value | Date/Time changed | Imported from |
|-------------------------------------|--------------------|----------------|-------------------|---------------|
| <b>General Settings</b>             |                    |                |                   |               |
| Analyst name                        | Pion               |                |                   |               |
| <b>Standard Experiment Settings</b> |                    |                |                   |               |
| Number of titrations                | 3                  |                |                   |               |
| Minimum pH                          | 2.000              |                |                   |               |
| Maximum pH                          | 9.000              |                |                   |               |
| pH step between points of           | 0.200              |                |                   |               |
| Minimum titrant addition            | 0.00002 mL         |                |                   |               |
| Maximum titrant addition            | 0.10000 mL         |                |                   |               |
| Argon flow rate                     | 100%               |                |                   |               |
| Start titration using               | Cautious pH adjust |                |                   |               |
| <b>Advanced General Settings</b>    |                    |                |                   |               |
| Detect turbidity using              | None               |                |                   |               |
| Collect turbidity sensor data       | No                 |                |                   |               |
| Collect UV spectra                  | No                 |                |                   |               |
| Stir after titrant addition for     | 5 seconds          |                |                   |               |
| For titrant addition, stir at       | 10%                |                |                   |               |
| <b>Titration Pre-Dose</b>           |                    |                |                   |               |
| Titration pre-dose                  | None               |                |                   |               |
| <b>Assay Medium</b>                 |                    |                |                   |               |
| ISA water volume                    | 1.50 mL            |                |                   |               |
| Water added                         | Automatic          |                |                   |               |
| Partition solvent type              | Octanol            |                |                   |               |
| Partition volume                    | 0.020 mL           |                |                   |               |
| Partition solvent added             | Automatic          |                |                   |               |
| After partition addition, stir for  | 1 seconds          |                |                   |               |
| <b>Sample Sonication</b>            |                    |                |                   |               |
| Sonicate                            | Yes                |                |                   |               |
| Adjust pH for sonication            | No                 |                |                   |               |
| Sonicate for                        | 120 seconds        |                |                   |               |
| After sonication stir for           | 5 seconds          |                |                   |               |
| <b>Sample Dissolution</b>           |                    |                |                   |               |
| Perform a dissolution stage         | Yes                |                |                   |               |
| Adjust and hold pH for dissolution  | To start pH        |                |                   |               |
| Stir to dissolve for                | 120 seconds        |                |                   |               |
| For dissolution, stir at            | 10%                |                |                   |               |
| <b>Carbonate purge</b>              |                    |                |                   |               |
| Perform a carbonate purge           | No                 |                |                   |               |
| <b>Temperature Control</b>          |                    |                |                   |               |
| Wait for temperature                | Yes                |                |                   |               |
| Required start temperature          | 25.0°C             |                |                   |               |
| Acceptable deviation                | 0.5°C              |                |                   |               |
| Time to wait                        | 60 seconds         |                |                   |               |
| Stir speed of                       | 50%                |                |                   |               |
| <b>Titration 1</b>                  |                    |                |                   |               |
| Titrate from                        | Low to high pH     |                |                   |               |
| Adjust to start pH                  | Yes                |                |                   |               |
| After pH adjust stir for            | 30 seconds         |                |                   |               |
| Stir to allow partitioning for      | 15 seconds         |                |                   |               |
| Stirrer speed for partitioning      | 50%                |                |                   |               |
| <b>Titration 2</b>                  |                    |                |                   |               |
| Titrate from                        | Low to high pH     |                |                   |               |
| Add additional water                | 0.00 mL            |                |                   |               |
| Additional partition solvent volume | 0.030 mL           |                |                   |               |
| Additional partition solvent added  | Automatic          |                |                   |               |
| After pH adjust stir for            | 30 seconds         |                |                   |               |
| Stir to allow partitioning for      | 15 seconds         |                |                   |               |
| Stirrer speed for partitioning      | 55%                |                |                   |               |



Sample name: **M12\_octanol**  
 Assay name: **pH-metric high logP**  
 Assay ID: **18C-03015**  
 Filename: **C:\Sirius\_T3\Mehtap\20180302\_exp29\_logP\_T3-2\18C-03015\_M12\_octanol\_pH-metric high logP.t3r**

Experiment start time: **3/3/2018 7:38:51 PM**  
 Analyst: **Pion**  
 Instrument ID: **T312060**

## Assay Settings (continued)

| Setting                             | Value          | Original Value | Date/Time changed | Imported from |
|-------------------------------------|----------------|----------------|-------------------|---------------|
| <b>Titration 3</b>                  |                |                |                   |               |
| Titrate from                        | Low to high pH |                |                   |               |
| Add additional water                | 0.00 mL        |                |                   |               |
| Additional partition solvent volume | 0.200 mL       |                |                   |               |
| Additional partition solvent added  | Automatic      |                |                   |               |
| After pH adjust stir for            | 30 seconds     |                |                   |               |
| Stir to allow partitioning for      | 15 seconds     |                |                   |               |
| Stirrer speed for partitioning      | 60%            |                |                   |               |
| <b>Data Point Stability</b>         |                |                |                   |               |
| Stir during data point collection   | No             |                |                   |               |
| Delay before data point collection  | 0 seconds      |                |                   |               |
| Number of points to average         | 20 points      |                |                   |               |
| Time interval between points        | 0.50 seconds   |                |                   |               |
| Required maximum standard deviation | 0.00100 dpH/dt |                |                   |               |
| Stability timeout after             | 60 seconds     |                |                   |               |

## Calibration Settings

| Setting                   | Value  | Date/Time changed   | Imported from             |
|---------------------------|--------|---------------------|---------------------------|
| Four-Plus alpha           | 0.111  | 3/3/2018 7:38:51 PM | C:\Sirius_T3\HCl18C02.t3r |
| Four-Plus S               | 0.9988 | 3/3/2018 7:38:51 PM | C:\Sirius_T3\HCl18C02.t3r |
| Four-Plus jH              | 1.0    | 3/3/2018 7:38:51 PM | C:\Sirius_T3\HCl18C02.t3r |
| Four-Plus jOH             | -0.8   | 3/3/2018 7:38:51 PM | C:\Sirius_T3\HCl18C02.t3r |
| Base concentration factor | 1.000  | 3/3/2018 7:38:51 PM | C:\Sirius_T3\KOH18B27.t3r |
| Acid concentration factor | 0.999  | 3/3/2018 7:38:51 PM | C:\Sirius_T3\HCl18C02.t3r |

## Instrument Settings

| Setting              | Value                      | Batch Id    | Install date           |
|----------------------|----------------------------|-------------|------------------------|
| Instrument owner     | Merck                      |             |                        |
| Instrument ID        | T312060                    |             |                        |
| Instrument type      | T3 Simulator               |             |                        |
| Software version     | 1.1.3.0                    |             |                        |
| Dispenser module     |                            | T3DM1200361 | 3/31/2009 5:24:52 AM   |
| Dispenser 0          | Water                      |             | 3/31/2009 5:25:05 AM   |
| Syringe volume       | 2.5 mL                     |             |                        |
| Firmware version     | 1.2.1(r2)                  |             |                        |
| Titrant              | Water (0.15 M KCl)         | 02-06-2018  | 2/27/2018 10:05:59 AM  |
| Dispenser 2          | Acid                       |             | 3/31/2009 5:25:11 AM   |
| Syringe volume       | 0.5 mL                     |             |                        |
| Firmware version     | 1.2.1(r2)                  |             |                        |
| Titrant              | Acid (0.5 M HCl)           | 02-27-2018  | 2/27/2018 10:27:22 AM  |
| Dispenser 1          | Base                       |             | 3/31/2009 5:25:21 AM   |
| Syringe volume       | 0.5 mL                     |             |                        |
| Firmware version     | 1.2.1(r2)                  |             |                        |
| Titrant              | Base (0.5 M KOH)           | 9/22/2017   | 2/27/2018 10:21:22 AM  |
| Dispenser 5          | Cosolvent                  |             | 3/31/2009 5:26:24 AM   |
| Syringe volume       | 2.5 mL                     |             |                        |
| Firmware version     | 1.2.1(r2)                  |             |                        |
| Distribution valve 5 | Distribution Valve         |             | 3/31/2009 5:28:19 AM   |
| Firmware version     | 1.1.3                      |             |                        |
| Port A               | Methanol (80%, 0.15 M KCl) | 09-26-17    | 2/7/2018 9:42:01 AM    |
| Port B               | Cyclohexane                | 11-01-17    | 2/27/2018 10:37:57 AM  |
| Dispenser 3          | Buffer                     |             | 8/3/2010 5:05:16 AM    |
| Syringe volume       | 0.5 mL                     |             |                        |
| Firmware version     | 1.2.1(r2)                  |             |                        |
| Titrant              | Dodecane                   | 2018/01/31  | 2/28/2018 10:18:04 AM  |
| Dispenser 6          | Octanol                    |             | 10/22/2010 10:52:43 AM |



Sample name: **M12\_octanol** Experiment start time: **3/3/2018 7:38:51 PM**  
 Assay name: **pH-metric high logP** Analyst: **Pion**  
 Assay ID: **18C-03015** Instrument ID: **T312060**  
 Filename: **C:\Sirius\_T3\Mehtap\20180302\_exp29\_logP\_T3-2\18C-03015\_M12\_octanol\_pH-metric high logP.t3r**

## Instrument Settings (continued)

| Setting                                   | Value                      | Batch Id    | Install date           |
|-------------------------------------------|----------------------------|-------------|------------------------|
| Syringe volume                            | 0.5 mL                     |             |                        |
| Firmware version                          | 1.2.1(r2)                  |             |                        |
| Titrant                                   | Octanol                    | 01-31-2018  | 2/27/2018 9:59:35 AM   |
| Titrator                                  |                            | T3TM1200161 | 3/31/2009 5:24:17 AM   |
| Horizontal axis firmware version          | 1.17 AI1DI2DO2 Stepper 2   |             |                        |
| Vertical axis firmware version            | 1.17 AI1DI2DO2 Stepper 2   |             |                        |
| Chassis I/O firmware version              | 1.11 AI1DI0DO4 Norgren I/O |             |                        |
| Probe I/O firmware version                | 1.1.1                      |             |                        |
| Electrode                                 | T3 Electrode               | T3E0923     | 1/23/2018 2:01:00 PM   |
| E0 calibration                            | +5.90 mV                   |             | 3/3/2018 7:39:19 PM    |
| Filling solution                          | 3M KCl                     | KCL097      | 3/2/2018 9:43:24 AM    |
| Liquids                                   |                            |             |                        |
| Wash 1                                    | 50% IPA:50% Water          |             | 3/2/2018 9:45:12 AM    |
| Wash 2                                    | 0.5% Triton X-100 in H2O   |             | 3/2/2018 9:45:15 AM    |
| Buffer position 1                         | pH7 Wash                   |             | 3/2/2018 9:45:18 AM    |
| Buffer position 2                         | pH 7                       |             | 3/2/2018 9:45:21 AM    |
| Storage position                          |                            |             | 3/2/2018 9:44:44 AM    |
| Wash water                                | 6.6e+003 mL                | 02-27-2018  | 2/27/2018 9:54:39 AM   |
| Waste                                     | 8.9e+003 mL                |             | 11/28/2017 10:36:29 AM |
| Temperature controller                    |                            |             | 8/5/2010 6:35:13 AM    |
| Turbidity detector                        |                            |             | 3/31/2009 5:24:45 AM   |
| Spectrometer                              |                            | 074811      | 11/23/2010 11:22:28 AM |
| Dip probe                                 |                            | 10196       |                        |
| Wavelength coefficient A0                 | 183.333                    |             |                        |
| Wavelength coefficient A1                 | 2.21568                    |             |                        |
| Wavelength coefficient A2                 | -0.000289308               |             |                        |
| Total lamp lit time                       | 120:41:49                  |             | 11/23/2010 11:22:28 AM |
| Calibrated on                             | 2/27/2018 10:40:38 AM      |             |                        |
| Integration time                          | 40                         |             |                        |
| Scans averaged                            | 10                         |             |                        |
| Autoloader                                |                            | T3AL1200345 | 11/10/2015 9:34:13 AM  |
| Left-right axis firmware version          | 1.17 AI1DI2DO2 Stepper 2   |             |                        |
| Front-back axis firmware version          | 1.17 AI1DI2DO2 Stepper 2   |             |                        |
| Vertical axis firmware version            | 1.17 AI1DI2DO2 Stepper 2   |             |                        |
| Chassis I/O firmware version              | 1.11 AI1DI0DO4 Norgren I/O |             |                        |
| Configuration                             |                            |             |                        |
| Alternate titration position              | Titration position         |             |                        |
| Alternate reference position              | Reference position         |             |                        |
| Maximum standard vial volume              | 3.50 mL                    |             |                        |
| Maximum alternate vial volume             | 25.00 mL                   |             |                        |
| Automatic action idle period              | 5 minute(s)                |             |                        |
| Titrant tube volume                       | 1.3 mL                     |             |                        |
| Syringe flush count                       | 3.50                       |             |                        |
| Flowing wash pump volume                  | 20.0 mL                    |             |                        |
| Flowing wash stir duration                | 5 s                        |             |                        |
| Flowing wash stir speed                   | 30%                        |             |                        |
| Solvent wash stir duration                | 5 s                        |             |                        |
| Solvent wash stir speed                   | 30%                        |             |                        |
| Surfactant wash stir duration             | 5 s                        |             |                        |
| Surfactant wash stir speed                | 30%                        |             |                        |
| E0 calibration minimum number of points   | 10                         |             |                        |
| E0 calibration maximum standard deviation | 0.01500                    |             |                        |
| E0 calibration timeout period             | 60 s                       |             |                        |
| E0 calibration stir duration              | 5 s                        |             |                        |
| E0 calibration preparation stir speed     | 30%                        |             |                        |
| E0 calibration buffer wash stir duration  | 5 s                        |             |                        |
| E0 calibration buffer wash stir speed     | 30%                        |             |                        |
| E0 calibration reading stir speed         | 0%                         |             |                        |

|              |                                                                                                   |                        |                            |
|--------------|---------------------------------------------------------------------------------------------------|------------------------|----------------------------|
| Sample name: | <b>M12_octanol</b>                                                                                | Experiment start time: | <b>3/3/2018 7:38:51 PM</b> |
| Assay name:  | <b>pH-metric high logP</b>                                                                        | Analyst:               | <b>Pion</b>                |
| Assay ID:    | <b>18C-03015</b>                                                                                  | Instrument ID:         | <b>T312060</b>             |
| Filename:    | <b>C:\Sirius_T3\Mehtap\20180302_exp29_logP_T3-2\18C-03015_M12_octanol_pH-metric high logP.t3r</b> |                        |                            |

## Instrument Settings (continued)

| Setting                                     | Value   | Batch Id | Install date |
|---------------------------------------------|---------|----------|--------------|
| Spectrometer calibration stir duration      | 5 s     |          |              |
| Spectrometer calibration stir speed         | 30%     |          |              |
| Spectrometer calibration wash pump volume   | 20.0 mL |          |              |
| Spectrometer calibration wash stir duration | 5 s     |          |              |
| Spectrometer calibration wash stir speed    | 30%     |          |              |
| Overhead dispense height                    | 10000   |          |              |

## Refinement Settings

| Setting                        | Value    | Default value |
|--------------------------------|----------|---------------|
| Turbidity detection method     | None     | None          |
| Turbidity wavelength to assess | 500.0 nm | 500.0 nm      |
| Turbidity maximum absorbance   | 0.100    | 0.100         |
| Turbidity probe threshold      | 50.00    | 50.00         |

## Experiment Log

[2:37] Air gap created for Water (0.15 M KCl)  
 [2:37] Air gap created for Acid (0.5 M HCl)  
 [2:38] Air gap created for Base (0.5 M KOH)  
 [2:38] Air gap released for Water (0.15 M KCl)  
 [2:42] Titrator arm moved over Titration position  
 [2:42] Titration 1 of 3  
 [2:42] Adding initial titrants  
 [2:42] Automatically add 1.50000 mL of water  
 [3:07] Dispensed 1.500000 mL of Water (0.15 M KCl)  
 [3:11] Titrator arm moved over Drain  
 [5:53] Titrator arm moved to Titration position  
 [5:53] Argon flow rate set to 100  
 [5:53] Stirrer speed set to 10  
 [5:58] Automatically add 0.02000 mL of Octanol  
 [5:58] Dispensed 0.019991 mL of Octanol  
 [6:00] Initial pH = 4.05  
 [6:00] Iterative adjust 4.05 -> 2.00  
 [6:00] pH 4.05 -> 2.00  
 [6:01] Air gap released for Acid (0.5 M HCl)  
 [6:02] Dispensed 0.047977 mL of Acid (0.5 M HCl)  
 [6:07] Holding pH 2.00  
 [8:07] Stirrer speed set to 0  
 [8:07] Stirrer speed set to 50  
 [8:07] Iterative adjust 1.98 -> 2.00  
 [8:07] pH 1.98 -> 2.00  
 [8:08] Air gap released for Base (0.5 M KOH)  
 [8:09] Dispensed 0.002328 mL of Base (0.5 M KOH)  
 [8:59] Stirrer speed set to 0  
 [9:09] Datapoint id 1 collected  
 [9:09] Stirrer speed set to 50  
 [9:14] pH 2.10 -> 2.30  
 [9:14] Using cautious pH adjust  
 [9:14] Dispensed 0.006232 mL of Base (0.5 M KOH)  
 [9:19] Stepping pH = 2.16  
 [9:20] Dispensed 0.006726 mL of Base (0.5 M KOH)  
 [9:25] Stepping pH = 2.26  
 [9:25] Dispensed 0.001881 mL of Base (0.5 M KOH)  
 [9:30] Stepping pH = 2.31  
 [9:45] Stirrer speed set to 0  
 [9:56] Datapoint id 2 collected  
 [9:56] Charge balance equation is out by -18.9%  
 [9:56] Stirrer speed set to 50

Sample name: **M12\_octanol**  
 Assay name: **pH-metric high logP**  
 Assay ID: **18C-03015**  
 Filename: **C:\Sirius\_T3\Mehtap\20180302\_exp29\_logP\_T3-2\18C-03015\_M12\_octanol\_pH-metric high logP.t3r**

Experiment start time: **3/3/2018 7:38:51 PM**  
 Analyst: **Pion**  
 Instrument ID: **T312060**

## Experiment Log (continued)

[10:01] pH 2.32 -> 2.52  
 [10:01] Using cautious pH adjust  
 [10:01] Dispensed 0.003810 mL of Base (0.5 M KOH)  
 [10:06] Stepping pH = 2.39  
 [10:06] Dispensed 0.004186 mL of Base (0.5 M KOH)  
 [10:11] Stepping pH = 2.49  
 [10:12] Dispensed 0.001129 mL of Base (0.5 M KOH)  
 [10:17] Stepping pH = 2.53  
 [10:32] Stirrer speed set to 0  
 [10:42] Datapoint id 3 collected  
 [10:42] Charge balance equation is out by -19.8%  
 [10:42] Stirrer speed set to 50  
 [10:47] pH 2.54 -> 2.74  
 [10:47] Using cautious pH adjust  
 [10:48] Dispensed 0.002469 mL of Base (0.5 M KOH)  
 [10:53] Stepping pH = 2.60  
 [10:53] Dispensed 0.002893 mL of Base (0.5 M KOH)  
 [10:58] Stepping pH = 2.70  
 [10:58] Dispensed 0.000823 mL of Base (0.5 M KOH)  
 [11:03] Stepping pH = 2.73  
 [11:18] Stirrer speed set to 0  
 [11:28] Datapoint id 4 collected  
 [11:28] Charge balance equation is out by -25.7%  
 [11:28] Stirrer speed set to 50  
 [11:33] pH 2.74 -> 2.94  
 [11:33] Using cautious pH adjust  
 [11:34] Dispensed 0.001740 mL of Base (0.5 M KOH)  
 [11:39] Stepping pH = 2.82  
 [11:39] Dispensed 0.001599 mL of Base (0.5 M KOH)  
 [11:44] Stepping pH = 2.90  
 [11:44] Dispensed 0.000494 mL of Base (0.5 M KOH)  
 [11:49] Stepping pH = 2.94  
 [12:04] Stirrer speed set to 0  
 [12:15] Datapoint id 5 collected  
 [12:15] Charge balance equation is out by -9.6%  
 [12:15] Stirrer speed set to 50  
 [12:20] pH 2.94 -> 3.14  
 [12:20] Using charge balance adjust  
 [12:20] Dispensed 0.002681 mL of Base (0.5 M KOH)  
 [12:40] Stirrer speed set to 0  
 [12:50] Datapoint id 6 collected  
 [12:50] Charge balance equation is out by -17.5%  
 [12:50] Stirrer speed set to 50  
 [12:55] pH 3.11 -> 3.31  
 [12:55] Using cautious pH adjust  
 [12:55] Dispensed 0.001152 mL of Base (0.5 M KOH)  
 [13:01] Stepping pH = 3.19  
 [13:01] Dispensed 0.001129 mL of Base (0.5 M KOH)  
 [13:06] Stepping pH = 3.27  
 [13:06] Dispensed 0.000447 mL of Base (0.5 M KOH)  
 [13:11] Stepping pH = 3.27  
 [13:11] Dispensed 0.002611 mL of Base (0.5 M KOH)  
 [13:16] Stepping pH = 3.68  
 [13:31] Stirrer speed set to 0  
 [13:43] Datapoint id 7 collected  
 [13:43] Charge balance equation is out by -131.1%  
 [13:43] Stirrer speed set to 50  
 [13:48] pH 3.65 -> 3.85  
 [13:48] Using cautious pH adjust

Sample name: **M12\_octanol**  
Assay name: **pH-metric high logP**  
Assay ID: **18C-03015**  
Filename: **C:\Sirius\_T3\Mehtap\20180302\_exp29\_logP\_T3-2\18C-03015\_M12\_octanol\_pH-metric high logP.t3r**

Experiment start time: **3/3/2018 7:38:51 PM**  
Analyst: **Pion**  
Instrument ID: **T312060**

## Experiment Log (continued)

[13:48] Dispensed 0.000800 mL of Base (0.5 M KOH)  
[13:53] Stepping pH = 3.73  
[13:53] Dispensed 0.000682 mL of Base (0.5 M KOH)  
[13:58] Stepping pH = 3.83  
[13:58] Dispensed 0.000094 mL of Base (0.5 M KOH)  
[14:03] Stepping pH = 3.83  
[14:04] Dispensed 0.000141 mL of Base (0.5 M KOH)  
[14:09] Stepping pH = 3.85  
[14:24] Stirrer speed set to 0  
[14:39] Datapoint id 8 collected  
[14:39] Charge balance equation is out by -7.4%  
[14:39] Stirrer speed set to 50  
[14:44] pH 3.82 -> 4.02  
[14:44] Using charge balance adjust  
[14:44] Dispensed 0.001341 mL of Base (0.5 M KOH)  
[15:04] Stirrer speed set to 0  
[15:16] Datapoint id 9 collected  
[15:16] Charge balance equation is out by -8.5%  
[15:16] Stirrer speed set to 50  
[15:21] pH 4.01 -> 4.21  
[15:21] Using charge balance adjust  
[15:21] Dispensed 0.001058 mL of Base (0.5 M KOH)  
[15:42] Stirrer speed set to 0  
[15:55] Datapoint id 10 collected  
[15:55] Charge balance equation is out by -11.1%  
[15:55] Stirrer speed set to 50  
[16:00] pH 4.21 -> 4.41  
[16:00] Using charge balance adjust  
[16:00] Dispensed 0.000776 mL of Base (0.5 M KOH)  
[16:21] Stirrer speed set to 0  
[16:44] Datapoint id 11 collected  
[16:44] Charge balance equation is out by -19.6%  
[16:44] Stirrer speed set to 50  
[16:49] pH 4.41 -> 4.61  
[16:49] Using cautious pH adjust  
[16:49] Dispensed 0.000282 mL of Base (0.5 M KOH)  
[16:54] Stepping pH = 4.43  
[16:55] Dispensed 0.000729 mL of Base (0.5 M KOH)  
[17:00] Stepping pH = 4.88  
[17:15] Stirrer speed set to 0  
[17:45] Datapoint id 12 collected  
[17:45] Charge balance equation is out by -84.8%  
[17:45] Stirrer speed set to 50  
[17:50] pH 4.90 -> 5.10  
[17:50] Using cautious pH adjust  
[17:50] Dispensed 0.000094 mL of Base (0.5 M KOH)  
[17:55] Stepping pH = 4.89  
[17:55] Dispensed 0.000517 mL of Base (0.5 M KOH)  
[18:00] Stepping pH = 5.56  
[18:15] Stirrer speed set to 0  
[19:08] Datapoint id 13 collected  
[19:08] Charge balance equation is out by -203.9%  
[19:08] Stirrer speed set to 50  
[19:13] pH 6.15 -> 6.35  
[19:13] Using cautious pH adjust  
[19:13] Dispensed 0.000024 mL of Base (0.5 M KOH)  
[19:18] Stepping pH = 6.19  
[19:18] Dispensed 0.000047 mL of Base (0.5 M KOH)  
[19:23] Stepping pH = 6.22

Sample name: **M12\_octanol**  
Assay name: **pH-metric high logP**  
Assay ID: **18C-03015**  
Filename: **C:\Sirius\_T3\Mehtap\20180302\_exp29\_logP\_T3-2\18C-03015\_M12\_octanol\_pH-metric high logP.t3r**

Experiment start time: **3/3/2018 7:38:51 PM**  
Analyst: **Pion**  
Instrument ID: **T312060**

## Experiment Log (continued)

[19:23] Dispensed 0.000094 mL of Base (0.5 M KOH)  
[19:29] Stepping pH = 6.26  
[19:29] Dispensed 0.000094 mL of Base (0.5 M KOH)  
[19:34] Stepping pH = 6.43  
[19:49] Stirrer speed set to 0  
[20:49] Datapoint id 14 collected  
[20:49] Charge balance equation is out by -426.3%  
[20:49] Stirrer speed set to 50  
[20:54] pH 7.06 -> 7.26  
[20:54] Using cautious pH adjust  
[20:54] Dispensed 0.000024 mL of Base (0.5 M KOH)  
[20:59] Stepping pH = 7.13  
[20:59] Dispensed 0.000024 mL of Base (0.5 M KOH)  
[21:04] Stepping pH = 7.20  
[21:04] Dispensed 0.000024 mL of Base (0.5 M KOH)  
[21:09] Stepping pH = 7.31  
[21:24] Stirrer speed set to 0  
[22:24] Datapoint id 15 collected  
[22:24] Charge balance equation is out by -279.1%  
[22:24] Stirrer speed set to 50  
[22:29] pH 7.62 -> 7.82  
[22:29] Using cautious pH adjust  
[22:30] Dispensed 0.000024 mL of Base (0.5 M KOH)  
[22:35] Stepping pH = 7.71  
[22:35] Dispensed 0.000024 mL of Base (0.5 M KOH)  
[22:40] Stepping pH = 7.77  
[22:40] Dispensed 0.000024 mL of Base (0.5 M KOH)  
[22:45] Stepping pH = 7.83  
[23:00] Stirrer speed set to 0  
[24:00] Datapoint id 16 collected  
[24:00] Charge balance equation is out by -785.0%  
[24:00] Stirrer speed set to 50  
[24:05] pH 8.16 -> 8.36  
[24:05] Using cautious pH adjust  
[24:05] Dispensed 0.000024 mL of Base (0.5 M KOH)  
[24:10] Stepping pH = 8.25  
[24:10] Dispensed 0.000024 mL of Base (0.5 M KOH)  
[24:15] Stepping pH = 8.30  
[24:15] Dispensed 0.000024 mL of Base (0.5 M KOH)  
[24:21] Stepping pH = 8.32  
[24:21] Dispensed 0.000024 mL of Base (0.5 M KOH)  
[24:26] Stepping pH = 8.35  
[24:41] Stirrer speed set to 0  
[25:41] Datapoint id 17 collected  
[25:41] Charge balance equation is out by -917.7%  
[25:41] Stirrer speed set to 50  
[25:46] pH 8.43 -> 8.63  
[25:46] Using cautious pH adjust  
[25:46] Dispensed 0.000024 mL of Base (0.5 M KOH)  
[25:51] Stepping pH = 8.44  
[25:51] Dispensed 0.000024 mL of Base (0.5 M KOH)  
[25:56] Stepping pH = 8.44  
[25:56] Dispensed 0.000047 mL of Base (0.5 M KOH)  
[26:01] Stepping pH = 8.46  
[26:01] Dispensed 0.000141 mL of Base (0.5 M KOH)  
[26:06] Stepping pH = 8.83  
[26:22] Stirrer speed set to 0  
[27:11] Datapoint id 18 collected  
[27:11] Charge balance equation is out by -1,849.5%

Sample name: **M12\_octanol**  
Assay name: **pH-metric high logP**  
Assay ID: **18C-03015**  
Filename: **C:\Sirius\_T3\Mehtap\20180302\_exp29\_logP\_T3-2\18C-03015\_M12\_octanol\_pH-metric high logP.t3r**

Experiment start time: **3/3/2018 7:38:51 PM**  
Analyst: **Pion**  
Instrument ID: **T312060**

## Experiment Log (continued)

[27:11] Titration 2 of 3  
[27:11] Adding initial titrants  
[27:11] Automatically add 0.03000 mL of Octanol  
[27:11] Dispensed 0.030009 mL of Octanol  
[27:11] Stirrer speed set to 10  
[27:13] Stirrer speed set to 55  
[27:13] Iterative adjust 9.17 -> 2.00  
[27:13] pH 9.17 -> 2.00  
[27:14] Dispensed 0.053763 mL of Acid (0.5 M HCl)  
[27:19] pH 2.02 -> 2.00  
[27:19] Dispensed 0.002140 mL of Acid (0.5 M HCl)  
[28:09] Stirrer speed set to 0  
[28:19] Datapoint id 19 collected  
[28:19] Stirrer speed set to 55  
[28:25] pH 2.01 -> 2.21  
[28:25] Using cautious pH adjust  
[28:25] Dispensed 0.008208 mL of Base (0.5 M KOH)  
[28:30] Stepping pH = 2.09  
[28:30] Dispensed 0.007785 mL of Base (0.5 M KOH)  
[28:35] Stepping pH = 2.18  
[28:36] Dispensed 0.001976 mL of Base (0.5 M KOH)  
[28:41] Stepping pH = 2.21  
[28:56] Stirrer speed set to 0  
[29:06] Datapoint id 20 collected  
[29:06] Charge balance equation is out by -9.5%  
[29:06] Stirrer speed set to 55  
[29:11] pH 2.22 -> 2.42  
[29:11] Using charge balance adjust  
[29:11] Dispensed 0.010466 mL of Base (0.5 M KOH)  
[29:31] Stirrer speed set to 0  
[29:42] Datapoint id 21 collected  
[29:42] Charge balance equation is out by -10.6%  
[29:42] Stirrer speed set to 55  
[29:47] pH 2.40 -> 2.60  
[29:47] Using charge balance adjust  
[29:47] Dispensed 0.007173 mL of Base (0.5 M KOH)  
[30:07] Stirrer speed set to 0  
[30:18] Datapoint id 22 collected  
[30:18] Charge balance equation is out by -9.0%  
[30:18] Stirrer speed set to 55  
[30:23] pH 2.59 -> 2.79  
[30:23] Using charge balance adjust  
[30:23] Dispensed 0.005080 mL of Base (0.5 M KOH)  
[30:43] Stirrer speed set to 0  
[30:53] Datapoint id 23 collected  
[30:53] Charge balance equation is out by -17.4%  
[30:53] Stirrer speed set to 55  
[30:59] pH 2.76 -> 2.96  
[30:59] Using cautious pH adjust  
[30:59] Dispensed 0.001952 mL of Base (0.5 M KOH)  
[31:04] Stepping pH = 2.83  
[31:04] Dispensed 0.002070 mL of Base (0.5 M KOH)  
[31:09] Stepping pH = 2.91  
[31:09] Dispensed 0.000823 mL of Base (0.5 M KOH)  
[31:14] Stepping pH = 2.95  
[31:29] Stirrer speed set to 0  
[31:40] Datapoint id 24 collected  
[31:40] Charge balance equation is out by -23.5%  
[31:40] Stirrer speed set to 55



Sample name: **M12\_octanol**  
Assay name: **pH-metric high logP**  
Assay ID: **18C-03015**  
Filename: **C:\Sirius\_T3\Mehtap\20180302\_exp29\_logP\_T3-2\18C-03015\_M12\_octanol\_pH-metric high logP.t3r**

Experiment start time: **3/3/2018 7:38:51 PM**  
Analyst: **Pion**  
Instrument ID: **T312060**

## Experiment Log (continued)

[31:45] pH 2.95 -> 3.15  
[31:45] Using cautious pH adjust  
[31:45] Dispensed 0.001552 mL of Base (0.5 M KOH)  
[31:50] Stepping pH = 3.03  
[31:50] Dispensed 0.001364 mL of Base (0.5 M KOH)  
[31:56] Stepping pH = 3.15  
[32:11] Stirrer speed set to 0  
[32:21] Datapoint id 25 collected  
[32:21] Charge balance equation is out by 5.6%  
[32:21] Stirrer speed set to 55  
[32:26] pH 3.15 -> 3.35  
[32:26] Using charge balance adjust  
[32:26] Dispensed 0.002469 mL of Base (0.5 M KOH)  
[32:46] Stirrer speed set to 0  
[32:57] Datapoint id 26 collected  
[32:57] Charge balance equation is out by -50.0%  
[32:57] Stirrer speed set to 55  
[33:02] pH 3.25 -> 3.45  
[33:02] Using cautious pH adjust  
[33:02] Dispensed 0.001105 mL of Base (0.5 M KOH)  
[33:07] Stepping pH = 3.29  
[33:07] Dispensed 0.002140 mL of Base (0.5 M KOH)  
[33:12] Stepping pH = 3.45  
[33:27] Stirrer speed set to 0  
[33:37] Datapoint id 27 collected  
[33:37] Charge balance equation is out by -46.4%  
[33:37] Stirrer speed set to 55  
[33:42] pH 3.46 -> 3.66  
[33:42] Using cautious pH adjust  
[33:43] Dispensed 0.000870 mL of Base (0.5 M KOH)  
[33:48] Stepping pH = 3.48  
[33:48] Dispensed 0.002375 mL of Base (0.5 M KOH)  
[33:53] Stepping pH = 3.75  
[34:08] Stirrer speed set to 0  
[34:19] Datapoint id 28 collected  
[34:19] Charge balance equation is out by -87.2%  
[34:19] Stirrer speed set to 55  
[34:24] pH 3.74 -> 3.94  
[34:24] Using cautious pH adjust  
[34:24] Dispensed 0.000588 mL of Base (0.5 M KOH)  
[34:29] Stepping pH = 3.73  
[34:29] Dispensed 0.003057 mL of Base (0.5 M KOH)  
[34:34] Stepping pH = 3.73  
[34:35] Dispensed 0.015522 mL of Base (0.5 M KOH)  
[34:40] Stepping pH = 3.73  
[34:42] Dispensed 0.078363 mL of Base (0.5 M KOH)  
[34:47] Stepping pH = 12.02  
[35:02] Stirrer speed set to 0  
[35:12] Datapoint id 29 collected  
[35:12] Charge balance equation is out by -8,214.2%  
[35:12] Titration 3 of 3  
[35:12] Adding initial titrants  
[35:12] Automatically add 0.20000 mL of Octanol  
[35:17] Dispensed 0.200000 mL of Octanol  
[35:17] Stirrer speed set to 10  
[35:18] Stirrer speed set to 60  
[35:18] Iterative adjust 12.03 -> 2.00  
[35:18] pH 12.03 -> 2.00  
[35:21] Dispensed 0.100000 mL of Acid (0.5 M HCl)

Sample name: **M12\_octanol**  
 Assay name: **pH-metric high logP**  
 Assay ID: **18C-03015**  
 Filename: **C:\Sirius\_T3\Mehtap\20180302\_exp29\_logP\_T3-2\18C-03015\_M12\_octanol\_pH-metric high logP.t3r**

Experiment start time: **3/3/2018 7:38:51 PM**  
 Analyst: **Pion**  
 Instrument ID: **T312060**

## Experiment Log (continued)

[35:26] pH 2.19 -> 2.00  
 [35:26] Dispensed 0.018650 mL of Acid (0.5 M HCl)  
 [35:31] pH 2.03 -> 2.00  
 [35:32] Dispensed 0.003104 mL of Acid (0.5 M HCl)  
 [36:22] Stirrer speed set to 0  
 [36:32] Datapoint id 30 collected  
 [36:32] Stirrer speed set to 60  
 [36:37] pH 1.98 -> 2.18  
 [36:37] Using cautious pH adjust  
 [36:37] Dispensed 0.010348 mL of Base (0.5 M KOH)  
 [36:42] Stepping pH = 2.07  
 [36:43] Dispensed 0.008420 mL of Base (0.5 M KOH)  
 [36:48] Stepping pH = 2.15  
 [36:48] Dispensed 0.002752 mL of Base (0.5 M KOH)  
 [36:53] Stepping pH = 2.18  
 [37:08] Stirrer speed set to 0  
 [37:18] Datapoint id 31 collected  
 [37:18] Charge balance equation is out by -4.0%  
 [37:18] Stirrer speed set to 60  
 [37:23] pH 2.18 -> 2.38  
 [37:23] Using charge balance adjust  
 [37:24] Dispensed 0.013382 mL of Base (0.5 M KOH)  
 [37:44] Stirrer speed set to 0  
 [37:54] Datapoint id 32 collected  
 [37:54] Charge balance equation is out by -6.2%  
 [37:54] Stirrer speed set to 60  
 [37:59] pH 2.38 -> 2.58  
 [37:59] Using charge balance adjust  
 [38:00] Dispensed 0.009102 mL of Base (0.5 M KOH)  
 [38:20] Stirrer speed set to 0  
 [38:30] Datapoint id 33 collected  
 [38:30] Charge balance equation is out by -2.7%  
 [38:30] Stirrer speed set to 60  
 [38:35] pH 2.58 -> 2.78  
 [38:35] Using charge balance adjust  
 [38:35] Dispensed 0.006256 mL of Base (0.5 M KOH)  
 [38:55] Stirrer speed set to 0  
 [39:05] Datapoint id 34 collected  
 [39:05] Charge balance equation is out by -9.2%  
 [39:05] Stirrer speed set to 60  
 [39:10] pH 2.77 -> 2.97  
 [39:10] Using charge balance adjust  
 [39:11] Dispensed 0.004563 mL of Base (0.5 M KOH)  
 [39:31] Stirrer speed set to 0  
 [39:41] Datapoint id 35 collected  
 [39:41] Charge balance equation is out by -0.9%  
 [39:41] Stirrer speed set to 60  
 [39:46] pH 2.97 -> 3.17  
 [39:46] Using charge balance adjust  
 [39:46] Dispensed 0.003293 mL of Base (0.5 M KOH)  
 [40:06] Stirrer speed set to 0  
 [40:16] Datapoint id 36 collected  
 [40:16] Charge balance equation is out by 3.4%  
 [40:16] Stirrer speed set to 60  
 [40:22] pH 3.18 -> 3.38  
 [40:22] Using charge balance adjust  
 [40:22] Dispensed 0.002305 mL of Base (0.5 M KOH)  
 [40:42] Stirrer speed set to 0  
 [40:52] Datapoint id 37 collected



Sample name: **M12\_octanol**  
Assay name: **pH-metric high logP**  
Assay ID: **18C-03015**  
Filename: **C:\Sirius\_T3\Mehtap\20180302\_exp29\_logP\_T3-2\18C-03015\_M12\_octanol\_pH-metric high logP.t3r**

Experiment start time: **3/3/2018 7:38:51 PM**  
Analyst: **Pion**  
Instrument ID: **T312060**

## Experiment Log (continued)

[40:52] Charge balance equation is out by 6.0%  
[40:52] Stirrer speed set to 60  
[40:57] pH 3.40 -> 3.60  
[40:57] Using charge balance adjust  
[40:57] Dispensed 0.001576 mL of Base (0.5 M KOH)  
[41:17] Stirrer speed set to 0  
[41:27] Datapoint id 38 collected  
[41:27] Charge balance equation is out by 34.7%  
[41:27] Stirrer speed set to 60  
[41:32] pH 3.68 -> 3.88  
[41:33] Using cautious pH adjust  
[41:33] Dispensed 0.000447 mL of Base (0.5 M KOH)  
[41:38] Stepping pH = 3.80  
[41:38] Dispensed 0.000212 mL of Base (0.5 M KOH)  
[41:43] Stepping pH = 3.87  
[41:43] Dispensed 0.000047 mL of Base (0.5 M KOH)  
[41:48] Stepping pH = 3.88  
[42:03] Stirrer speed set to 0  
[42:13] Datapoint id 39 collected  
[42:13] Charge balance equation is out by 21.2%  
[42:13] Stirrer speed set to 60  
[42:18] pH 3.88 -> 4.08  
[42:18] Using cautious pH adjust  
[42:18] Dispensed 0.000306 mL of Base (0.5 M KOH)  
[42:23] Stepping pH = 4.09  
[42:38] Stirrer speed set to 0  
[42:57] Datapoint id 40 collected  
[42:57] Charge balance equation is out by 50.0%  
[42:57] Stirrer speed set to 60  
[43:02] pH 4.10 -> 4.30  
[43:02] Using cautious pH adjust  
[43:02] Dispensed 0.000188 mL of Base (0.5 M KOH)  
[43:07] Stepping pH = 4.24  
[43:07] Dispensed 0.000071 mL of Base (0.5 M KOH)  
[43:12] Stepping pH = 4.29  
[43:27] Stirrer speed set to 0  
[43:38] Datapoint id 41 collected  
[43:38] Charge balance equation is out by 32.9%  
[43:38] Stirrer speed set to 60  
[43:43] pH 4.32 -> 4.52  
[43:43] Using cautious pH adjust  
[43:43] Dispensed 0.000118 mL of Base (0.5 M KOH)  
[43:48] Stepping pH = 4.48  
[43:48] Dispensed 0.000024 mL of Base (0.5 M KOH)  
[43:53] Stepping pH = 4.50  
[43:53] Dispensed 0.000024 mL of Base (0.5 M KOH)  
[43:58] Stepping pH = 4.51  
[44:13] Stirrer speed set to 0  
[44:24] Datapoint id 42 collected  
[44:24] Charge balance equation is out by 33.2%  
[44:24] Stirrer speed set to 60  
[44:30] pH 4.50 -> 4.70  
[44:30] Using cautious pH adjust  
[44:30] Dispensed 0.000071 mL of Base (0.5 M KOH)  
[44:35] Stepping pH = 4.58  
[44:35] Dispensed 0.000071 mL of Base (0.5 M KOH)  
[44:40] Stepping pH = 4.76  
[44:55] Stirrer speed set to 0  
[45:13] Datapoint id 43 collected

Sample name: **M12\_octanol**  
Assay name: **pH-metric high logP**  
Assay ID: **18C-03015**  
Filename: **C:\Sirius\_T3\Mehtap\20180302\_exp29\_logP\_T3-2\18C-03015\_M12\_octanol\_pH-metric high logP.t3r**

Experiment start time: **3/3/2018 7:38:51 PM**  
Analyst: **Pion**  
Instrument ID: **T312060**

## Experiment Log (continued)

[45:13] Charge balance equation is out by 6.7%  
[45:13] Stirrer speed set to 60  
[45:19] pH 4.82 -> 5.02  
[45:19] Using charge balance adjust  
[45:19] Dispensed 0.000094 mL of Base (0.5 M KOH)  
[45:39] Stirrer speed set to 0  
[45:51] Datapoint id 44 collected  
[45:51] Charge balance equation is out by 9.7%  
[45:51] Stirrer speed set to 60  
[45:56] pH 5.11 -> 5.31  
[45:56] Using charge balance adjust  
[45:56] Dispensed 0.000047 mL of Base (0.5 M KOH)  
[46:17] Stirrer speed set to 0  
[46:44] Datapoint id 45 collected  
[46:44] Charge balance equation is out by -48.8%  
[46:44] Stirrer speed set to 60  
[46:49] pH 5.25 -> 5.45  
[46:49] Using cautious pH adjust  
[46:49] Dispensed 0.000024 mL of Base (0.5 M KOH)  
[46:54] Stepping pH = 5.29  
[46:55] Dispensed 0.000047 mL of Base (0.5 M KOH)  
[47:00] Stepping pH = 5.71  
[47:15] Stirrer speed set to 0  
[48:01] Datapoint id 46 collected  
[48:01] Charge balance equation is out by -35.1%  
[48:01] Stirrer speed set to 60  
[48:06] pH 5.76 -> 5.96  
[48:06] Using cautious pH adjust  
[48:06] Dispensed 0.000024 mL of Base (0.5 M KOH)  
[48:11] Stepping pH = 5.77  
[48:11] Dispensed 0.000071 mL of Base (0.5 M KOH)  
[48:16] Stepping pH = 6.49  
[48:31] Stirrer speed set to 0  
[49:31] Datapoint id 47 collected  
[49:31] Charge balance equation is out by -96.3%  
[49:31] Stirrer speed set to 60  
[49:36] pH 6.31 -> 6.51  
[49:36] Using cautious pH adjust  
[49:37] Dispensed 0.000024 mL of Base (0.5 M KOH)  
[49:42] Stepping pH = 6.43  
[49:42] Dispensed 0.000024 mL of Base (0.5 M KOH)  
[49:47] Stepping pH = 6.61  
[50:02] Stirrer speed set to 0  
[51:02] Datapoint id 48 collected  
[51:02] Charge balance equation is out by 8.4%  
[51:02] Stirrer speed set to 60  
[51:07] pH 6.70 -> 6.90  
[51:07] Using charge balance adjust  
[51:07] Dispensed 0.000047 mL of Base (0.5 M KOH)  
[51:27] Stirrer speed set to 0  
[52:27] Datapoint id 49 collected  
[52:27] Charge balance equation is out by 34.8%  
[52:27] Stirrer speed set to 60  
[52:32] pH 7.04 -> 7.24  
[52:32] Using cautious pH adjust  
[52:32] Dispensed 0.000024 mL of Base (0.5 M KOH)  
[52:37] Stepping pH = 7.10  
[52:38] Dispensed 0.000024 mL of Base (0.5 M KOH)  
[52:43] Stepping pH = 7.22

Sample name: **M12\_octanol**  
Assay name: **pH-metric high logP**  
Assay ID: **18C-03015**  
Filename: **C:\Sirius\_T3\Mehtap\20180302\_exp29\_logP\_T3-2\18C-03015\_M12\_octanol\_pH-metric high logP.t3r**

Experiment start time: **3/3/2018 7:38:51 PM**  
Analyst: **Pion**  
Instrument ID: **T312060**

## Experiment Log (continued)

[52:43] Dispensed 0.000024 mL of Base (0.5 M KOH)  
[52:48] Stepping pH = 7.37  
[53:03] Stirrer speed set to 0  
[54:03] Datapoint id 50 collected  
[54:03] Charge balance equation is out by -157.9%  
[54:03] Stirrer speed set to 60  
[54:08] pH 7.43 -> 7.63  
[54:08] Using cautious pH adjust  
[54:08] Dispensed 0.000024 mL of Base (0.5 M KOH)  
[54:13] Stepping pH = 7.56  
[54:13] Dispensed 0.000024 mL of Base (0.5 M KOH)  
[54:18] Stepping pH = 7.60  
[54:18] Dispensed 0.000024 mL of Base (0.5 M KOH)  
[54:23] Stepping pH = 7.61  
[54:24] Dispensed 0.000024 mL of Base (0.5 M KOH)  
[54:29] Stepping pH = 7.67  
[54:44] Stirrer speed set to 0  
[55:44] Datapoint id 51 collected  
[55:44] Charge balance equation is out by -542.8%  
[55:44] Stirrer speed set to 60  
[55:49] pH 7.65 -> 7.85  
[55:49] Using cautious pH adjust  
[55:49] Dispensed 0.000024 mL of Base (0.5 M KOH)  
[55:54] Stepping pH = 7.78  
[55:54] Dispensed 0.000024 mL of Base (0.5 M KOH)  
[55:59] Stepping pH = 7.97  
[56:14] Stirrer speed set to 0  
[57:14] Datapoint id 52 collected  
[57:14] Charge balance equation is out by -323.4%  
[57:14] Stirrer speed set to 60  
[57:19] pH 8.02 -> 8.22  
[57:19] Using cautious pH adjust  
[57:19] Dispensed 0.000024 mL of Base (0.5 M KOH)  
[57:24] Stepping pH = 8.15  
[57:25] Dispensed 0.000024 mL of Base (0.5 M KOH)  
[57:30] Stepping pH = 8.27  
[57:45] Stirrer speed set to 0  
[58:45] Datapoint id 53 collected  
[58:45] Charge balance equation is out by -340.7%  
[58:45] Stirrer speed set to 60  
[58:50] pH 8.22 -> 8.42  
[58:50] Using cautious pH adjust  
[58:50] Dispensed 0.000024 mL of Base (0.5 M KOH)  
[58:55] Stepping pH = 8.29  
[58:55] Dispensed 0.000024 mL of Base (0.5 M KOH)  
[59:00] Stepping pH = 8.35  
[59:00] Dispensed 0.000024 mL of Base (0.5 M KOH)  
[59:05] Stepping pH = 8.51  
[59:20] Stirrer speed set to 0  
[59:59] Datapoint id 54 collected  
[59:59] Charge balance equation is out by -425.0%  
[59:59] Stirrer speed set to 60  
[1:00:04] pH 8.57 -> 8.77  
[1:00:04] Using cautious pH adjust  
[1:00:04] Dispensed 0.000024 mL of Base (0.5 M KOH)  
[1:00:09] Stepping pH = 8.60  
[1:00:09] Dispensed 0.000024 mL of Base (0.5 M KOH)  
[1:00:15] Stepping pH = 8.67  
[1:00:15] Dispensed 0.000024 mL of Base (0.5 M KOH)



|              |                                                                                                   |                        |                            |
|--------------|---------------------------------------------------------------------------------------------------|------------------------|----------------------------|
| Sample name: | <b>M12_octanol</b>                                                                                | Experiment start time: | <b>3/3/2018 7:38:51 PM</b> |
| Assay name:  | <b>pH-metric high logP</b>                                                                        | Analyst:               | <b>Pion</b>                |
| Assay ID:    | <b>18C-03015</b>                                                                                  | Instrument ID:         | <b>T312060</b>             |
| Filename:    | <b>C:\Sirius_T3\Mehtap\20180302_exp29_logP_T3-2\18C-03015_M12_octanol_pH-metric high logP.t3r</b> |                        |                            |

---

**Experiment Log (continued)**

[1:00:20] Stepping pH = 8.72  
[1:00:20] Dispensed 0.000024 mL of Base (0.5 M KOH)  
[1:00:25] Stepping pH = 8.80  
[1:00:40] Stirrer speed set to 0  
[1:01:09] Datapoint id 55 collected  
[1:01:09] Charge balance equation is out by -284.9%  
[1:01:09] Stirrer speed set to 60  
[1:01:15] pH 8.80 -> 9.00  
[1:01:15] Using cautious pH adjust  
[1:01:15] Dispensed 0.000024 mL of Base (0.5 M KOH)  
[1:01:20] Stepping pH = 8.81  
[1:01:20] Dispensed 0.000047 mL of Base (0.5 M KOH)  
[1:01:25] Stepping pH = 8.92  
[1:01:25] Dispensed 0.000024 mL of Base (0.5 M KOH)  
[1:01:30] Stepping pH = 8.97  
[1:01:30] Dispensed 0.000024 mL of Base (0.5 M KOH)  
[1:01:35] Stepping pH = 9.01  
[1:01:50] Stirrer speed set to 0  
[1:02:05] Datapoint id 56 collected  
[1:02:05] Charge balance equation is out by -258.0%  
[1:02:05] Argon flow rate set to 0  
[1:02:09] Titrator arm moved over Titration position

---
