# Supplementary material for: Octanol-water partition coefficient measurements for the SAMPL6 Blind Prediction Challenge
Source: bioRxiv or medRxiv preprint supplement (doi:10.1101/757393), 2019-12-02
Supplement: Supplementary file [file media-2.zip]

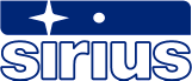

Sample name: **M08\_octanol**  
Assay name: **pH-metric high logP**  
Assay ID: **18B-28014**  
Filename: **G:\OpenLab\_PFA\_Sirius-T3-2\Data2018\18B-28014\_M08\_octanol\_pH-metric high logP.t3r**

Experiment start time: **2/28/2018 9:57:03 PM**  
Analyst: **Pion**  
Instrument ID: **T312060**

## pH-metric Result

logP (neutral XH) 3.97  
logP (X -) 1.86  
RMSD 0.921

### 18B-28014 Points 2 to 29

M08\_octanol concentration factor 0.885  
Carbonate 0.0000 mM  
Acidity error -0.44323 mM

### 18B-28014 Points 30 to 68

M08\_octanol concentration factor 1.148  
Carbonate 0.0724 mM  
Acidity error -0.45335 mM

### 18B-28014 Points 69 to 110

M08\_octanol concentration factor 0.843  
Carbonate 0.4970 mM  
Acidity error -0.17938 mM

## Warnings and errors

Errors None  
Warnings None

## Sample logD and percent species

| pH     | M08_octanol<br>logD | M08_octanol<br>M08_octanolH | M08_octanol<br>M08_octanol | M08_octanol<br>M08_octanolH* | M08_octanol<br>M08_octanol* | Comment    |
|--------|---------------------|-----------------------------|----------------------------|------------------------------|-----------------------------|------------|
| 1.000  | 3.97                | 0.01 %                      | 0.00 %                     | 99.99 %                      | 0.00 %                      | Stomach pH |
| 1.200  | 3.97                | 0.01 %                      | 0.00 %                     | 99.99 %                      | 0.00 %                      |            |
| 2.000  | 3.97                | 0.01 %                      | 0.00 %                     | 99.98 %                      | 0.00 %                      |            |
| 3.000  | 3.95                | 0.01 %                      | 0.00 %                     | 99.94 %                      | 0.05 %                      |            |
| 4.000  | 3.77                | 0.01 %                      | 0.01 %                     | 99.52 %                      | 0.46 %                      |            |
| 5.000  | 3.15                | 0.01 %                      | 0.06 %                     | 95.49 %                      | 4.44 %                      | Blood pH   |
| 6.000  | 2.35                | 0.01 %                      | 0.43 %                     | 67.96 %                      | 31.59 %                     |            |
| 6.500  | 2.08                | 0.00 %                      | 0.81 %                     | 40.15 %                      | 59.03 %                     |            |
| 7.000  | 1.95                | 0.00 %                      | 1.12 %                     | 17.50 %                      | 81.37 %                     |            |
| 7.400  | 1.90                | 0.00 %                      | 1.25 %                     | 7.79 %                       | 90.96 %                     |            |
| 8.000  | 1.87                | 0.00 %                      | 1.33 %                     | 2.08 %                       | 96.59 %                     |            |
| 9.000  | 1.86                | 0.00 %                      | 1.35 %                     | 0.21 %                       | 98.43 %                     |            |
| 10.000 | 1.86                | 0.00 %                      | 1.36 %                     | 0.02 %                       | 98.62 %                     |            |
| 11.000 | 1.86                | 0.00 %                      | 1.36 %                     | 0.00 %                       | 98.64 %                     |            |
| 12.000 | 1.86                | 0.00 %                      | 1.36 %                     | 0.00 %                       | 98.64 %                     |            |

Sample name: **M08\_octanol**  
 Assay name: **pH-metric high logP**  
 Assay ID: **18B-28014**  
 Filename: **G:\OpenLab\_PFA\_Sirius-T3-2\Data2018\18B-28014\_M08\_octanol\_pH-metric high logP.t3r**

Experiment start time: **2/28/2018 9:57:03 PM**  
 Analyst: **Pion**  
 Instrument ID: **T312060**

## Graphs

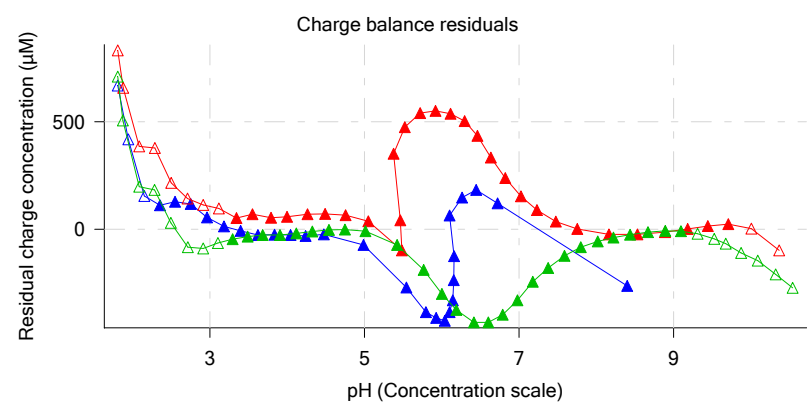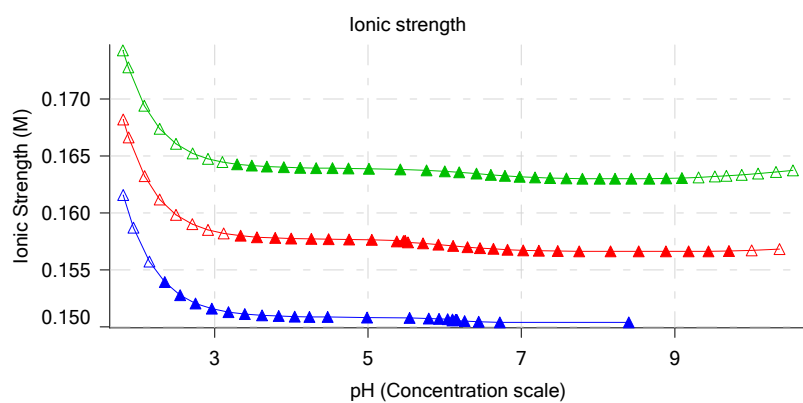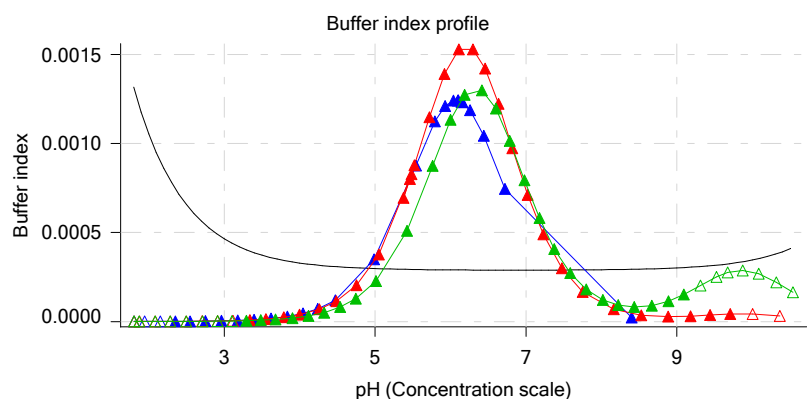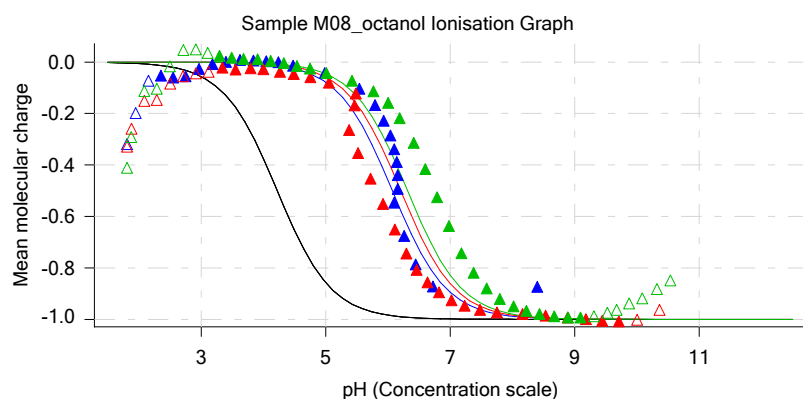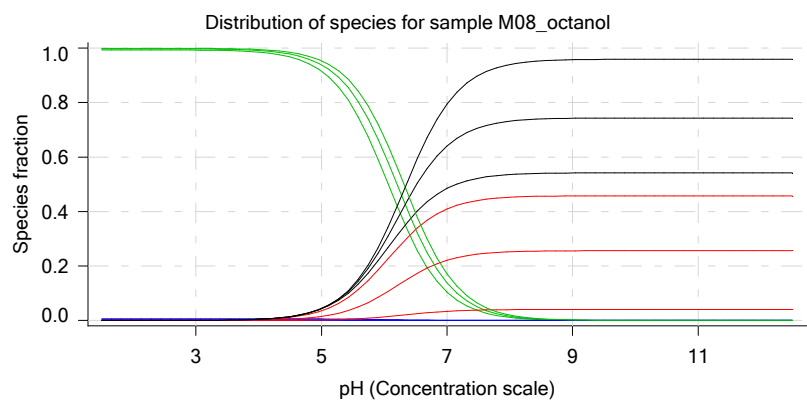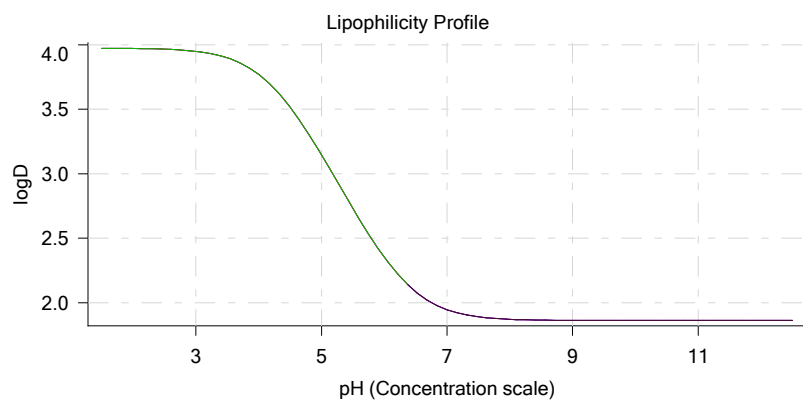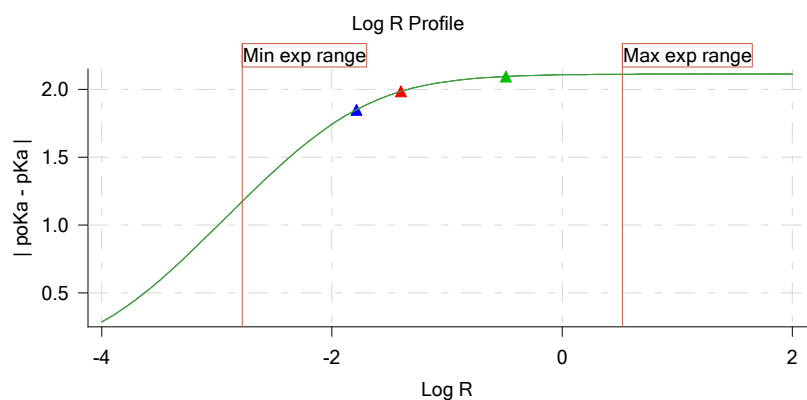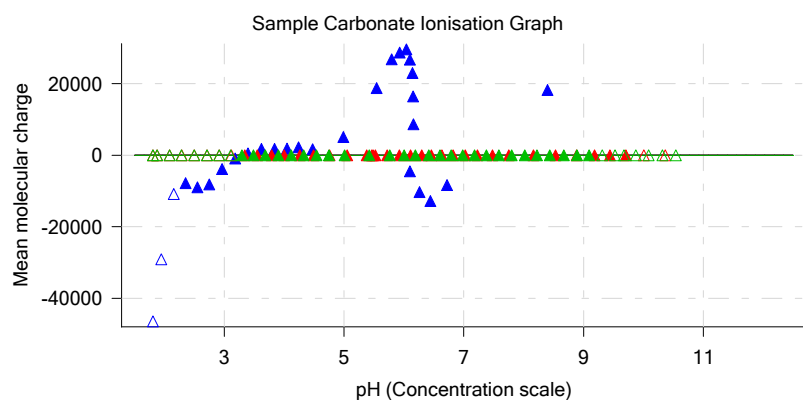

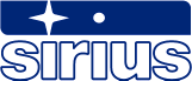

Sample name: **M08\_octanol**  
Assay name: **pH-metric high logP**  
Assay ID: **18B-28014**  
Filename: **G:\OpenLab\_PFA\_Sirius-T3-2\Data2018\18B-28014\_M08\_octanol\_pH-metric high logP.t3r**

Experiment start time: **2/28/2018 9:57:03 PM**  
Analyst: **Pion**  
Instrument ID: **T312060**

## Graphs (continued)

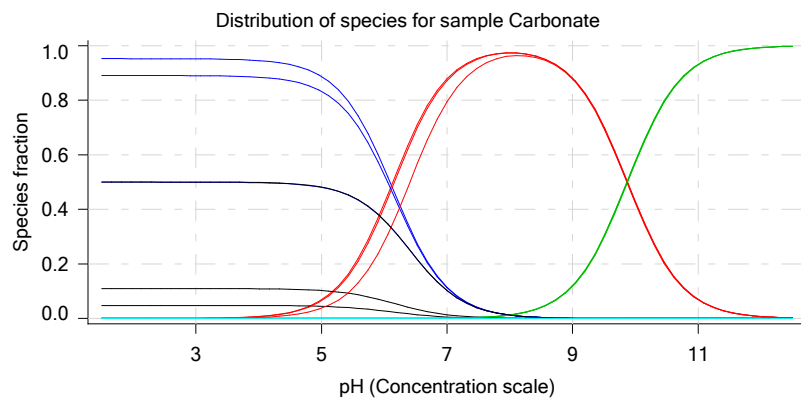

Sample name: **M08\_octanol**  
 Assay name: **pH-metric high logP**  
 Assay ID: **18B-28014**  
 Filename: **G:\OpenLab\_PFA\_Sirius-T3-2\Data2018\18B-28014\_M08\_octanol\_pH-metric high logP.t3r**

Experiment start time: **2/28/2018 9:57:03 PM**  
 Analyst: **Pion**  
 Instrument ID: **T312060**

## pH-metric high logP Titration 1 of 3 18B-28014 Points 2 to 29

### Overall results

RMSD 1.233  
 Average ionic strength 0.151 M  
 Average temperature 24.9°C  
 Partition ratio 0.0163 : 1  
 Analyte concentration range 2327.5 µM to 2407.5 µM  
 Total points considered 25 of 28

### Warnings and errors

Errors None  
 Warnings None

### Four-Plus parameters

Alpha 0.130 2/28/2018 9:57:03 PM C:\Sirius\_T3\HCl18B27.t3r  
 S 0.9970 2/28/2018 9:57:03 PM C:\Sirius\_T3\HCl18B27.t3r  
 jH 0.8 2/28/2018 9:57:03 PM C:\Sirius\_T3\HCl18B27.t3r  
 jOH -0.4 2/28/2018 9:57:03 PM C:\Sirius\_T3\HCl18B27.t3r

### Titrants

0.50 M HCl 0.993513 2/28/2018 9:57:03 PM C:\Sirius\_T3\HCl18B27.t3r  
 0.50 M KOH 0.999845 2/28/2018 9:57:03 PM C:\Sirius\_T3\KOH18B27.t3r

### Sample

M08\_octanol concentration factor 0.885  
 Acid pKa 1 4.22  
 logP (neutral XH) 4.09  
 logP (X-) 1.80

### Sample graphs

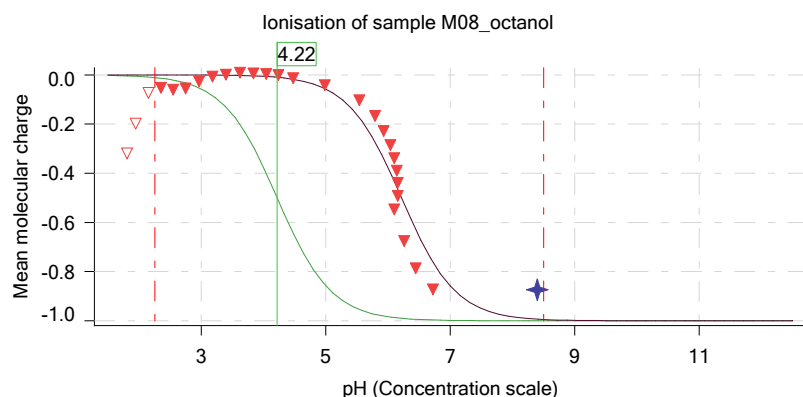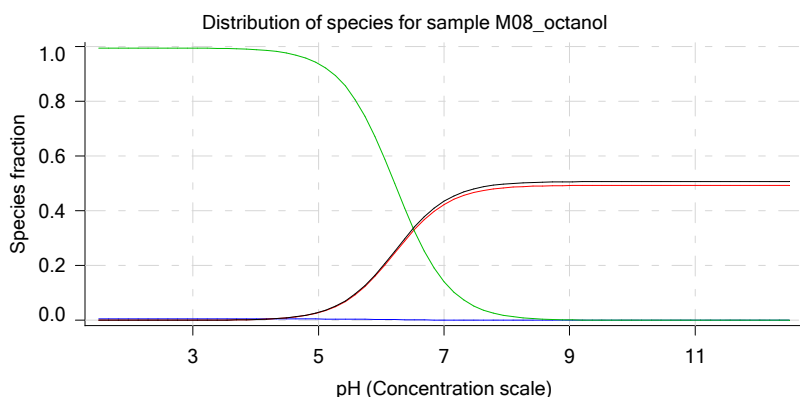

Sample name: **M08\_octanol**  
 Assay name: **pH-metric high logP**  
 Assay ID: **18B-28014**  
 Filename: **G:\OpenLab\_PFA\_Sirius-T3-2\Data2018\18B-28014\_M08\_octanol\_pH-metric high logP.t3r**

Experiment start time: **2/28/2018 9:57:03 PM**  
 Analyst: **Pion**  
 Instrument ID: **T312060**

## Sample graphs (continued)

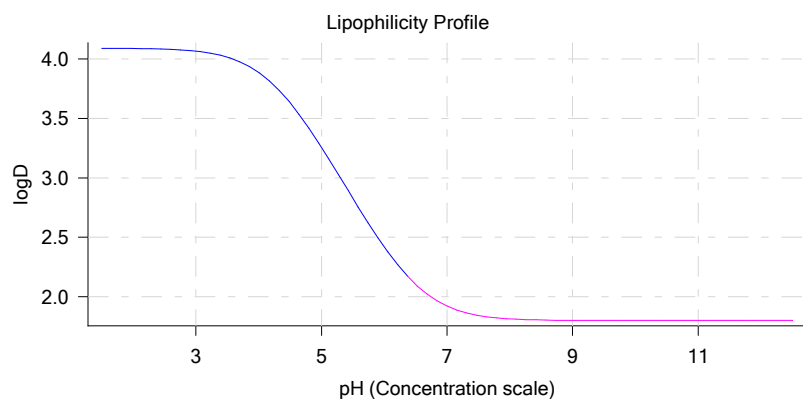

## Sample logD and percent species

| pH     | M08_octanol<br>logD | M08_octanol<br>M08_octanolH | M08_octanol<br>M08_octanol | M08_octanol<br>M08_octanolH* | M08_octanol<br>M08_octanol* | Comment |
|--------|---------------------|-----------------------------|----------------------------|------------------------------|-----------------------------|---------|
| 1.000  | 4.09                | 0.49 %                      | 0.00 %                     | 99.50 %                      | 0.00 %                      |         |
| 1.200  | 4.09                | 0.49 %                      | 0.00 %                     | 99.50 %                      | 0.00 %                      |         |
| 2.000  | 4.09                | 0.49 %                      | 0.00 %                     | 99.50 %                      | 0.00 %                      |         |
| 3.000  | 4.07                | 0.49 %                      | 0.03 %                     | 99.44 %                      | 0.03 %                      |         |
| 4.000  | 3.89                | 0.49 %                      | 0.30 %                     | 98.91 %                      | 0.30 %                      |         |
| 5.000  | 3.26                | 0.47 %                      | 2.81 %                     | 93.83 %                      | 2.89 %                      |         |
| 6.000  | 2.42                | 0.31 %                      | 18.58 %                    | 62.00 %                      | 19.11 %                     |         |
| 6.500  | 2.10                | 0.17 %                      | 32.38 %                    | 34.16 %                      | 33.29 %                     |         |
| 7.000  | 1.92                | 0.07 %                      | 42.31 %                    | 14.12 %                      | 43.50 %                     |         |
| 7.400  | 1.85                | 0.03 %                      | 46.26 %                    | 6.14 %                       | 47.56 %                     |         |
| 8.000  | 1.81                | 0.01 %                      | 48.51 %                    | 1.62 %                       | 49.87 %                     |         |
| 9.000  | 1.80                | 0.00 %                      | 49.23 %                    | 0.16 %                       | 50.61 %                     |         |
| 10.000 | 1.80                | 0.00 %                      | 49.30 %                    | 0.02 %                       | 50.68 %                     |         |
| 11.000 | 1.80                | 0.00 %                      | 49.31 %                    | 0.00 %                       | 50.69 %                     |         |
| 12.000 | 1.80                | 0.00 %                      | 49.31 %                    | 0.00 %                       | 50.69 %                     |         |

## Carbonate and acidity

Carbonate 0.000 mM  
 Acidity error -0.443 mM

## Other graphs

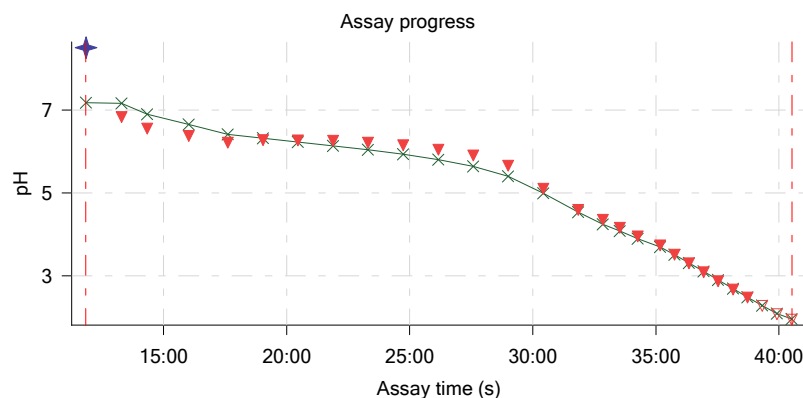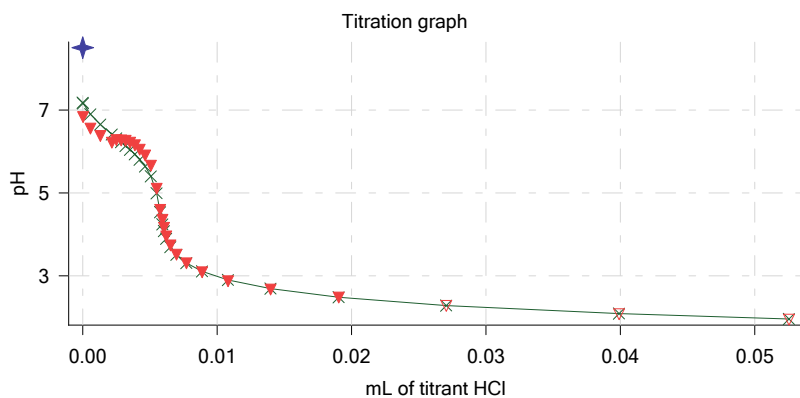

Sample name: **M08\_octanol**  
 Assay name: **pH-metric high logP**  
 Assay ID: **18B-28014**  
 Filename: **G:\OpenLab\_PFA\_Sirius-T3-2\Data2018\18B-28014\_M08\_octanol\_pH-metric high logP.t3r**

Experiment start time: **2/28/2018 9:57:03 PM**  
 Analyst: **Pion**  
 Instrument ID: **T312060**

## Other graphs (continued)

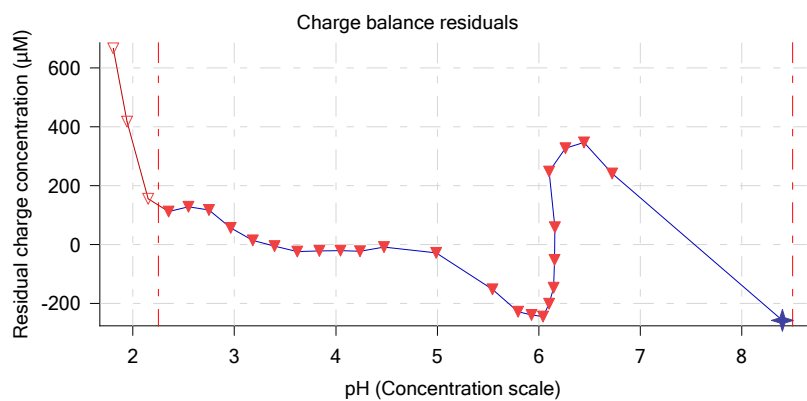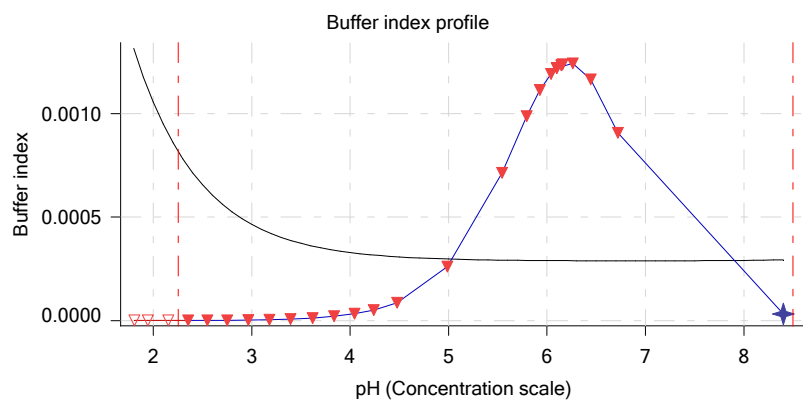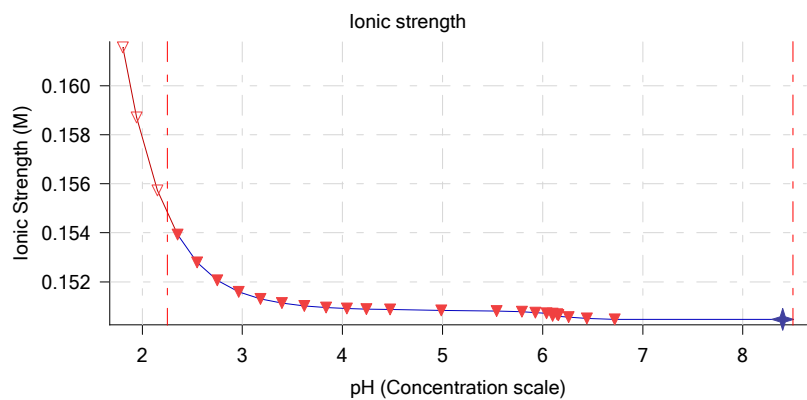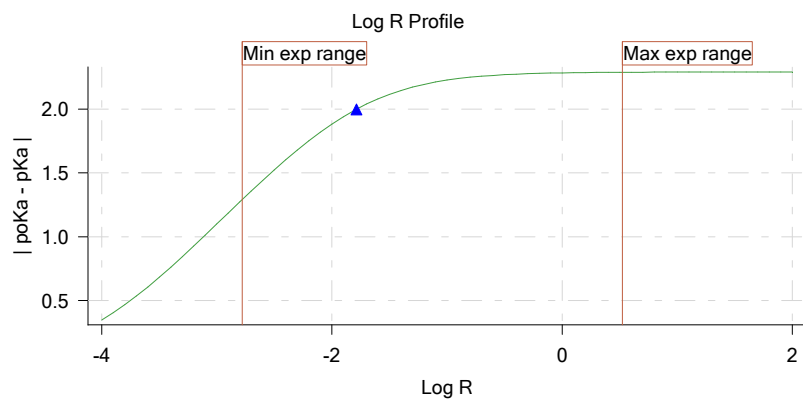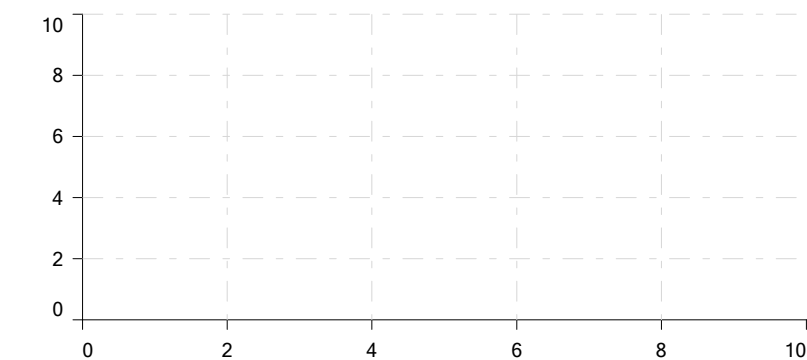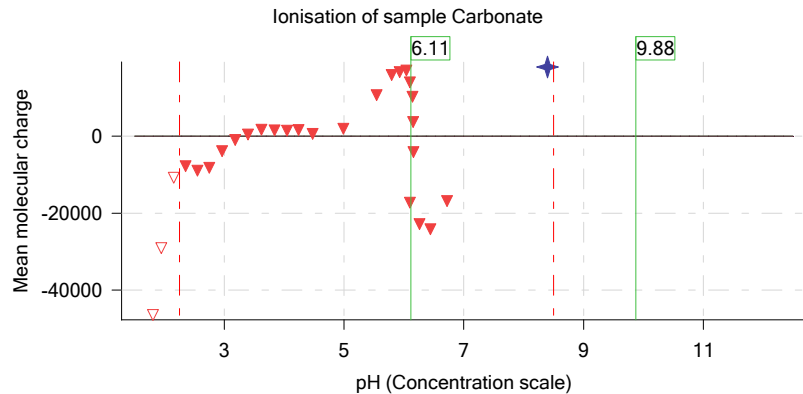

Sample name: **M08\_octanol**  
 Assay name: **pH-metric high logP**  
 Assay ID: **18B-28014**  
 Filename: **G:\OpenLab\_PFA\_Sirius-T3-2\Data2018\18B-28014\_M08\_octanol\_pH-metric high logP.t3r**

Experiment start time: **2/28/2018 9:57:03 PM**  
 Analyst: **Pion**  
 Instrument ID: **T312060**

## pH-metric high logP Titration 2 of 3 18B-28014 Points 30 to 68

### Overall results

RMSD 0.274  
 Average ionic strength 0.157 M  
 Average temperature 25.0°C  
 Partition ratio 0.0399 : 1  
 Analyte concentration range 2118.8 µM to 2194.1 µM  
 Total points considered 29 of 39

### Warnings and errors

Errors None  
 Warnings None

### Four-Plus parameters

Alpha 0.130 2/28/2018 9:57:03 PM C:\Sirius\_T3\HCl18B27.t3r  
 S 0.9970 2/28/2018 9:57:03 PM C:\Sirius\_T3\HCl18B27.t3r  
 jH 0.8 2/28/2018 9:57:03 PM C:\Sirius\_T3\HCl18B27.t3r  
 jOH -0.4 2/28/2018 9:57:03 PM C:\Sirius\_T3\HCl18B27.t3r

### Titrants

0.50 M HCl 0.993513 2/28/2018 9:57:03 PM C:\Sirius\_T3\HCl18B27.t3r  
 0.50 M KOH 0.999845 2/28/2018 9:57:03 PM C:\Sirius\_T3\KOH18B27.t3r

### Sample

M08\_octanol concentration factor 1.148  
 Acid pKa 1 4.22  
 logP (neutral XH) 3.62  
 logP (X-) 1.80

### Sample graphs

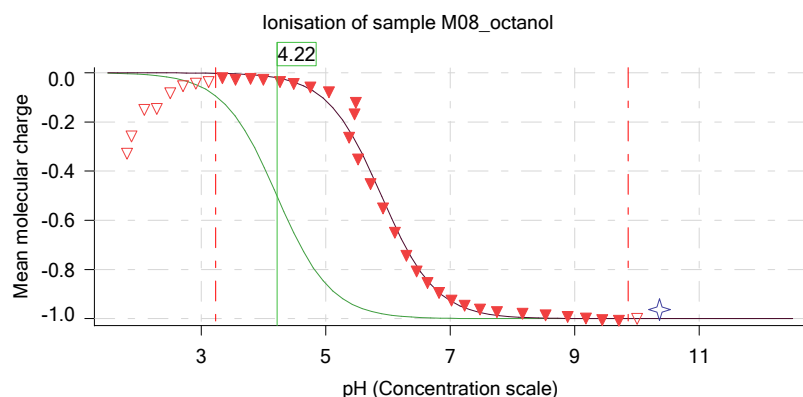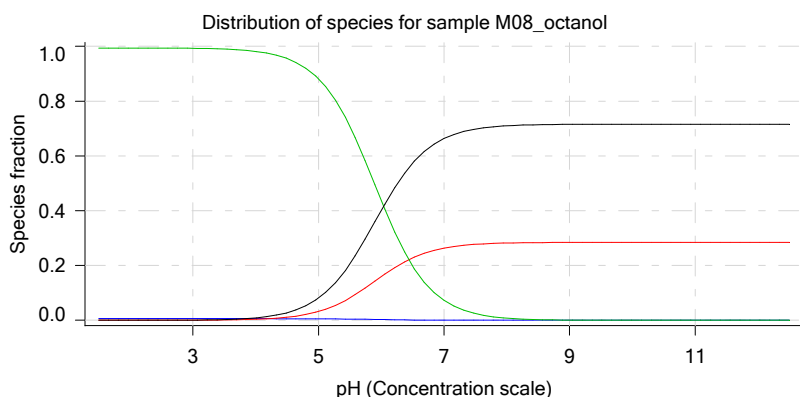

Sample name: **M08\_octanol**  
 Assay name: **pH-metric high logP**  
 Assay ID: **18B-28014**  
 Filename: **G:\OpenLab\_PFA\_Sirius-T3-2\Data2018\18B-28014\_M08\_octanol\_pH-metric high logP.t3r**

Experiment start time: **2/28/2018 9:57:03 PM**  
 Analyst: **Pion**  
 Instrument ID: **T312060**

## Sample graphs (continued)

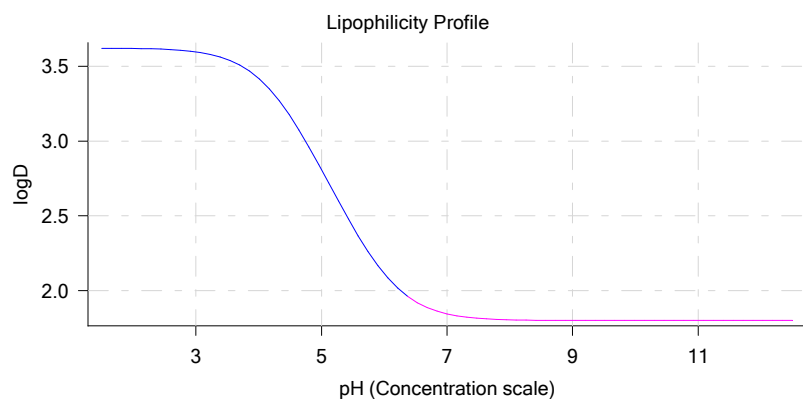

## Sample logD and percent species

| pH     | M08_octanol<br>logD | M08_octanol<br>M08_octanolH | M08_octanol<br>M08_octanolH | M08_octanol<br>M08_octanolH* | M08_octanol<br>M08_octanol* | Comment |
|--------|---------------------|-----------------------------|-----------------------------|------------------------------|-----------------------------|---------|
| 1.000  | 3.62                | 0.59 %                      | 0.00 %                      | 99.40 %                      | 0.00 %                      |         |
| 1.200  | 3.62                | 0.59 %                      | 0.00 %                      | 99.40 %                      | 0.00 %                      |         |
| 2.000  | 3.62                | 0.59 %                      | 0.00 %                      | 99.39 %                      | 0.01 %                      |         |
| 3.000  | 3.60                | 0.59 %                      | 0.04 %                      | 99.28 %                      | 0.09 %                      |         |
| 4.000  | 3.42                | 0.59 %                      | 0.35 %                      | 98.17 %                      | 0.89 %                      |         |
| 5.000  | 2.81                | 0.53 %                      | 3.18 %                      | 88.28 %                      | 8.01 %                      |         |
| 6.000  | 2.12                | 0.26 %                      | 15.85 %                     | 43.97 %                      | 39.91 %                     |         |
| 6.500  | 1.93                | 0.12 %                      | 22.73 %                     | 19.93 %                      | 57.22 %                     |         |
| 7.000  | 1.84                | 0.04 %                      | 26.34 %                     | 7.31 %                       | 66.31 %                     |         |
| 7.400  | 1.82                | 0.02 %                      | 27.56 %                     | 3.04 %                       | 69.38 %                     |         |
| 8.000  | 1.80                | 0.00 %                      | 28.21 %                     | 0.78 %                       | 71.01 %                     |         |
| 9.000  | 1.80                | 0.00 %                      | 28.41 %                     | 0.08 %                       | 71.51 %                     |         |
| 10.000 | 1.80                | 0.00 %                      | 28.43 %                     | 0.01 %                       | 71.56 %                     |         |
| 11.000 | 1.80                | 0.00 %                      | 28.43 %                     | 0.00 %                       | 71.57 %                     |         |
| 12.000 | 1.80                | 0.00 %                      | 28.43 %                     | 0.00 %                       | 71.57 %                     |         |

## Carbonate and acidity

Carbonate 0.072 mM  
 Acidity error -0.453 mM

## Other graphs

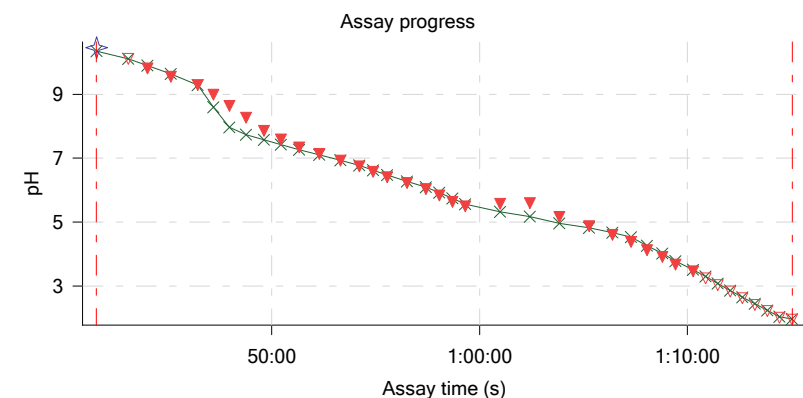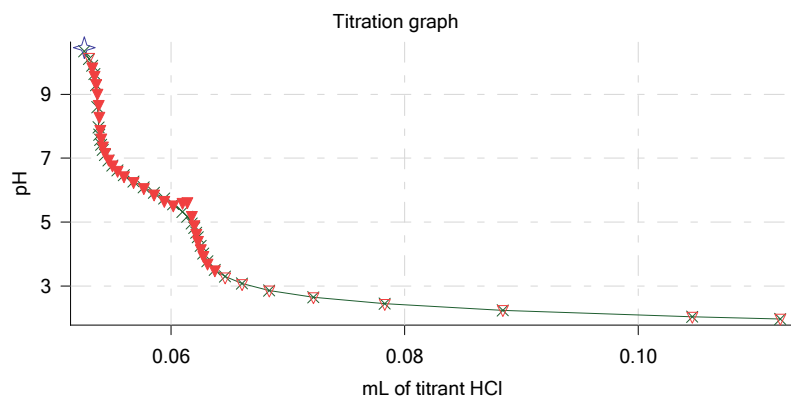



Sample name: **M08\_octanol**  
 Assay name: **pH-metric high logP**  
 Assay ID: **18B-28014**  
 Filename: **G:\OpenLab\_PFA\_Sirius-T3-2\Data2018\18B-28014\_M08\_octanol\_pH-metric high logP.t3r**

Experiment start time: **2/28/2018 9:57:03 PM**  
 Analyst: **Pion**  
 Instrument ID: **T312060**

## Other graphs (continued)

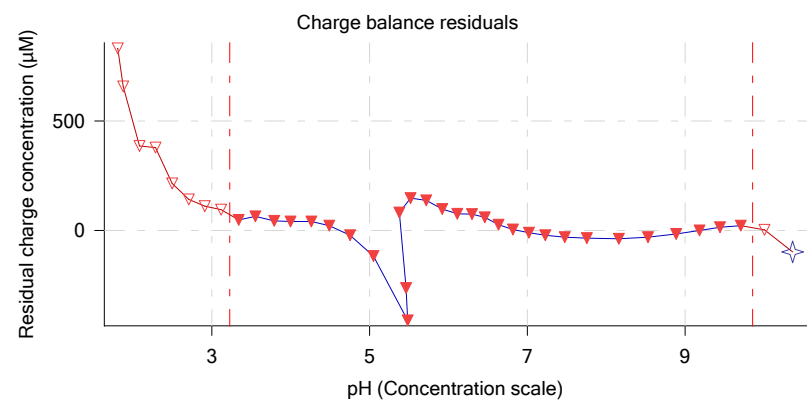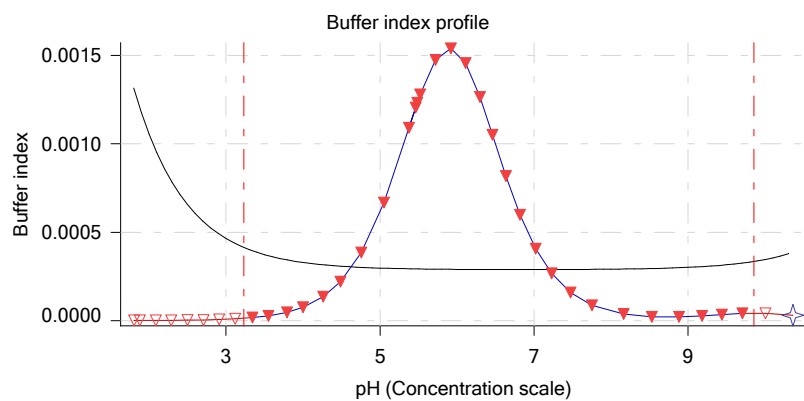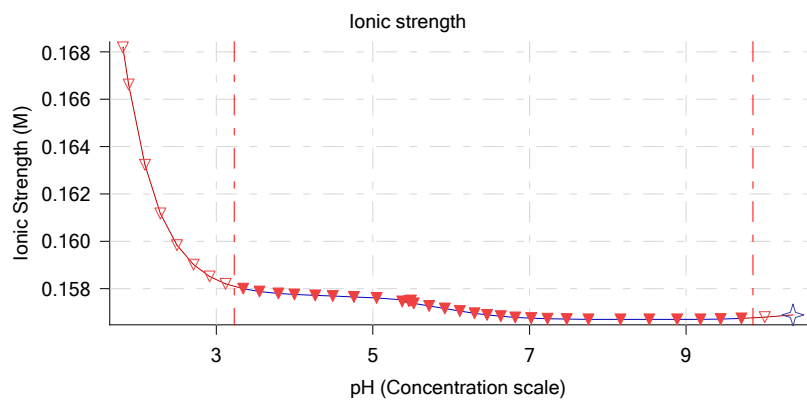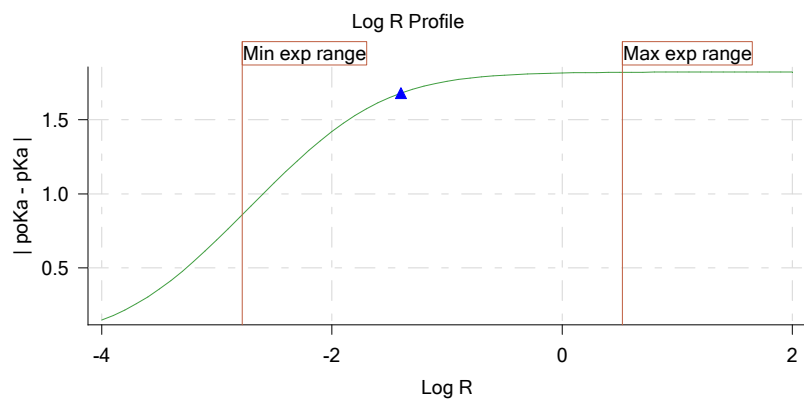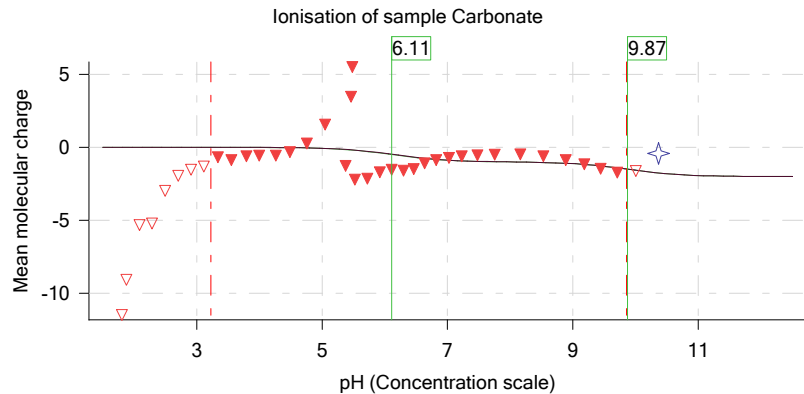

Sample name: **M08\_octanol**  
 Assay name: **pH-metric high logP**  
 Assay ID: **18B-28014**  
 Filename: **G:\OpenLab\_PFA\_Sirius-T3-2\Data2018\18B-28014\_M08\_octanol\_pH-metric high logP.t3r**

Experiment start time: **2/28/2018 9:57:03 PM**  
 Analyst: **Pion**  
 Instrument ID: **T312060**

pH-metric high logP Titration 3 of 3 18B-28014 Points 69 to 110

## Overall results

RMSD 0.091  
 Average ionic strength 0.164 M  
 Average temperature 25.0°C  
 Partition ratio 0.3243 : 1  
 Analyte concentration range 1558.1 µM to 1601.9 µM  
 Total points considered 27 of 42

## Warnings and errors

Errors None  
 Warnings None

## Four-Plus parameters

Alpha 0.130 2/28/2018 9:57:03 PM C:\Sirius\_T3\HCl18B27.t3r  
 S 0.9970 2/28/2018 9:57:03 PM C:\Sirius\_T3\HCl18B27.t3r  
 jH 0.8 2/28/2018 9:57:03 PM C:\Sirius\_T3\HCl18B27.t3r  
 jOH -0.4 2/28/2018 9:57:03 PM C:\Sirius\_T3\HCl18B27.t3r

## Titrants

0.50 M HCl 0.993513 2/28/2018 9:57:03 PM C:\Sirius\_T3\HCl18B27.t3r  
 0.50 M KOH 0.999845 2/28/2018 9:57:03 PM C:\Sirius\_T3\KOH18B27.t3r

## Sample

M08\_octanol concentration factor 0.843  
 Acid pKa 1 4.22  
 logP (neutral XH) 4.34  
 logP (X -) 1.80

## Sample graphs

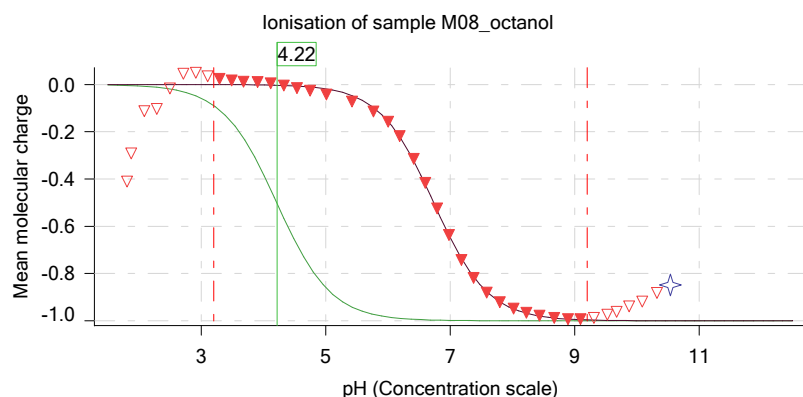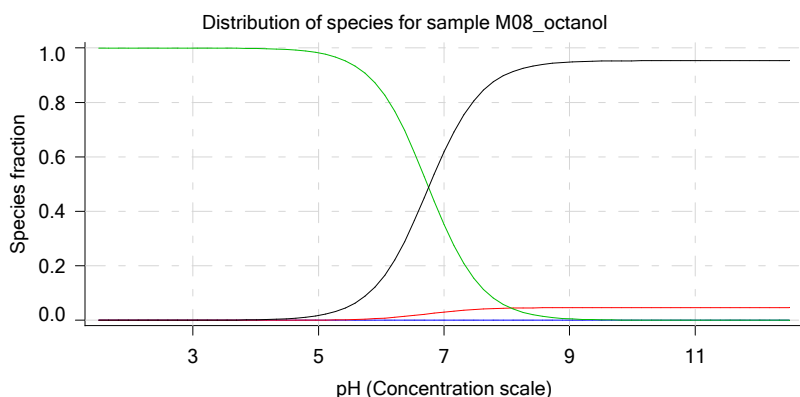

Sample name: **M08\_octanol**  
 Assay name: **pH-metric high logP**  
 Assay ID: **18B-28014**  
 Filename: **G:\OpenLab\_PFA\_Sirius-T3-2\Data2018\18B-28014\_M08\_octanol\_pH-metric high logP.t3r**

Experiment start time: **2/28/2018 9:57:03 PM**  
 Analyst: **Pion**  
 Instrument ID: **T312060**

## Sample graphs (continued)

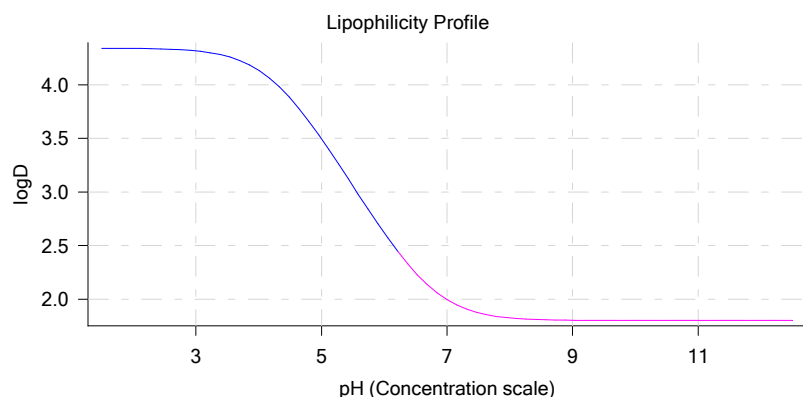

## Sample logD and percent species

| pH     | M08_octanol<br>logD | M08_octanol<br>M08_octanolH | M08_octanol<br>M08_octanolH | M08_octanol<br>M08_octanolH* | M08_octanol<br>M08_octanol* | Comment |
|--------|---------------------|-----------------------------|-----------------------------|------------------------------|-----------------------------|---------|
| 1.000  | 4.34                | 0.01 %                      | 0.00 %                      | 99.99 %                      | 0.00 %                      |         |
| 1.200  | 4.34                | 0.01 %                      | 0.00 %                      | 99.99 %                      | 0.00 %                      |         |
| 2.000  | 4.34                | 0.01 %                      | 0.00 %                      | 99.98 %                      | 0.00 %                      |         |
| 3.000  | 4.32                | 0.01 %                      | 0.00 %                      | 99.97 %                      | 0.02 %                      |         |
| 4.000  | 4.14                | 0.01 %                      | 0.01 %                      | 99.81 %                      | 0.17 %                      |         |
| 5.000  | 3.50                | 0.01 %                      | 0.08 %                      | 98.21 %                      | 1.69 %                      |         |
| 6.000  | 2.63                | 0.01 %                      | 0.71 %                      | 84.66 %                      | 14.61 %                     |         |
| 6.500  | 2.25                | 0.01 %                      | 1.70 %                      | 63.59 %                      | 34.70 %                     |         |
| 7.000  | 2.00                | 0.00 %                      | 3.00 %                      | 35.59 %                      | 61.41 %                     |         |
| 7.400  | 1.89                | 0.00 %                      | 3.82 %                      | 18.03 %                      | 78.15 %                     |         |
| 8.000  | 1.82                | 0.00 %                      | 4.42 %                      | 5.24 %                       | 90.35 %                     |         |
| 9.000  | 1.80                | 0.00 %                      | 4.63 %                      | 0.55 %                       | 94.82 %                     |         |
| 10.000 | 1.80                | 0.00 %                      | 4.66 %                      | 0.06 %                       | 95.29 %                     |         |
| 11.000 | 1.80                | 0.00 %                      | 4.66 %                      | 0.01 %                       | 95.33 %                     |         |
| 12.000 | 1.80                | 0.00 %                      | 4.66 %                      | 0.00 %                       | 95.34 %                     |         |

## Carbonate and acidity

Carbonate 0.497 mM  
 Acidity error -0.179 mM

## Other graphs

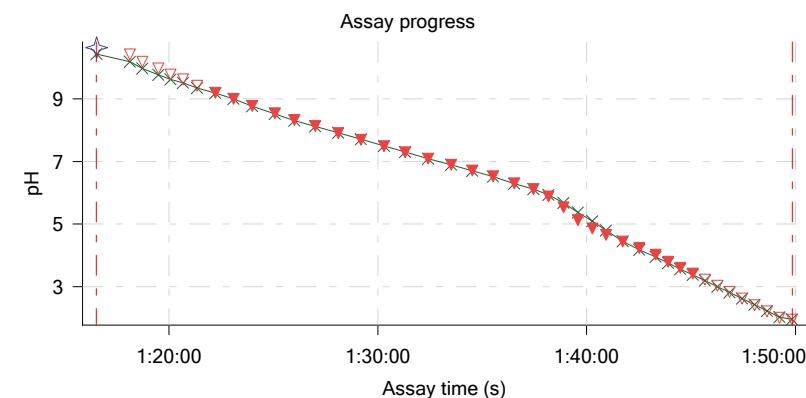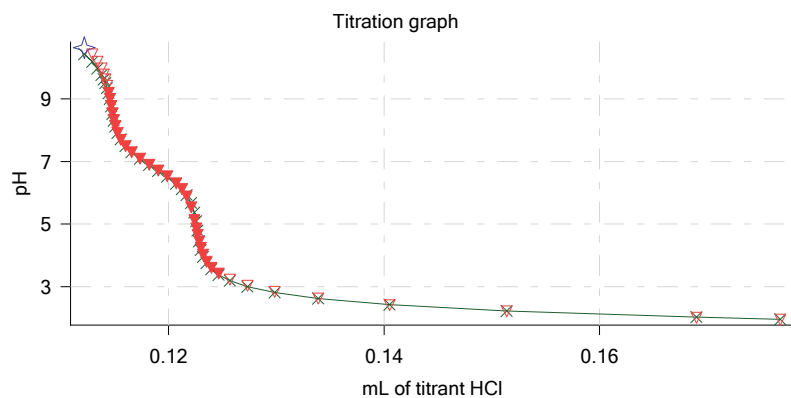

Sample name: **M08\_octanol**  
 Assay name: **pH-metric high logP**  
 Assay ID: **18B-28014**  
 Filename: **G:\OpenLab\_PFA\_Sirius-T3-2\Data2018\18B-28014\_M08\_octanol\_pH-metric high logP.t3r**

Experiment start time: **2/28/2018 9:57:03 PM**  
 Analyst: **Pion**  
 Instrument ID: **T312060**

## Other graphs (continued)

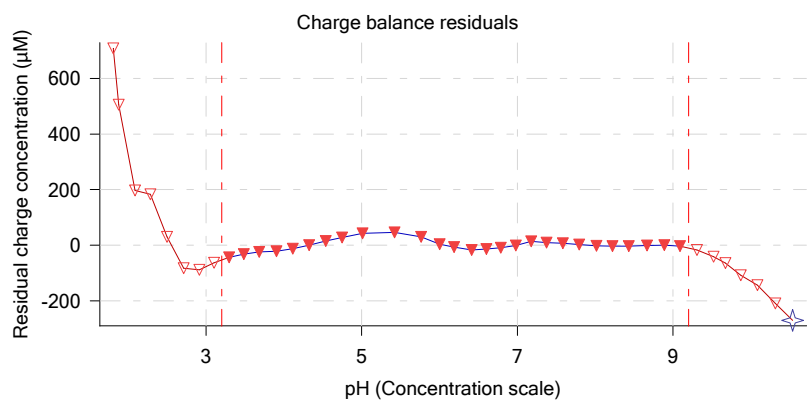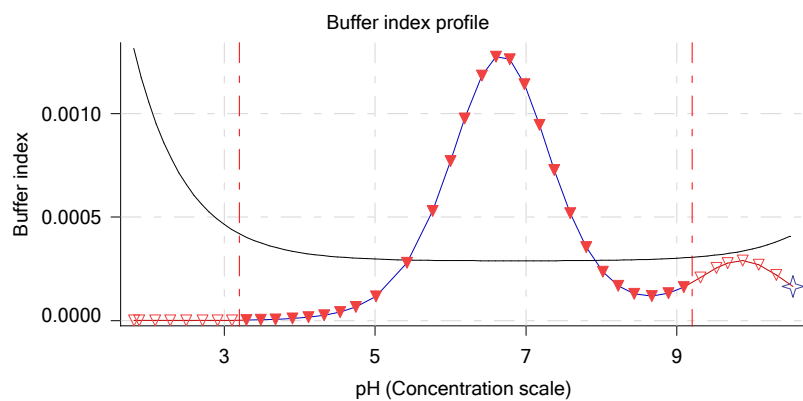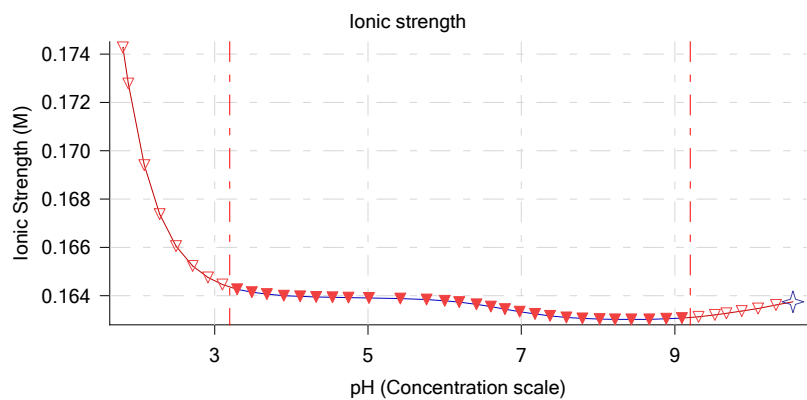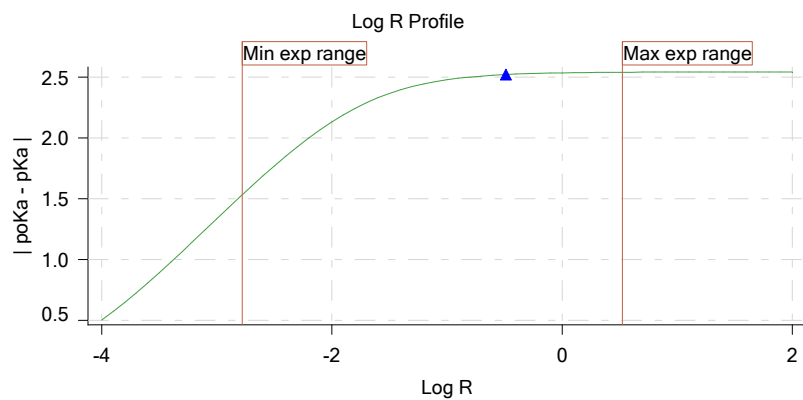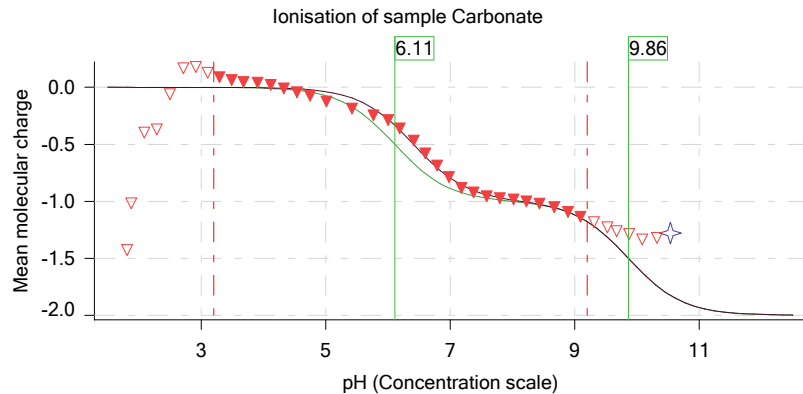



## Assay model

Sample name: **M08\_octanol** Experiment start time: **2/28/2018 9:57:03 PM**  
Assay name: **pH-metric high logP** Analyst: **Pion**  
Assay ID: **18B-28014** Instrument ID: **T312060**  
Filename: **G:\OpenLab\_PFA\_Sirius-T3-2\Data2018\18B-28014\_M08\_octanol\_pH-metric high logP.t3r**

## Assay Model

| Settings                          | Value        | Date/Time changed    | Imported from      |
|-----------------------------------|--------------|----------------------|--------------------|
| Sample name                       | M08_octanol  | 2/27/2018 5:33:51 PM | User entered value |
| Sample by                         | Weight       |                      | Default value      |
| Sample weight                     | 0.001080 g   | 2/28/2018 5:24:25 PM | User entered value |
| Formula weight                    | 293.32 g/mol | 2/27/2018 5:33:51 PM | User entered value |
| Solubility                        | Unknown      |                      | Default value      |
| Molecular weight                  | 293.32       | 2/27/2018 5:33:51 PM | User entered value |
| Individual pKa ionic environments | No           |                      | Default value      |
| Number of pKas                    | 1            | 2/27/2018 5:33:51 PM | User entered value |
| Sample is a                       | Acid         | 2/27/2018 5:33:51 PM | User entered value |
| pKa 1                             | 4.22         | 2/27/2018 5:33:51 PM | User entered value |
| logP (neutral XH)                 | 3.45         | 2/28/2018 2:34:15 PM | User entered value |
| logP (X -)                        | 1.80         | 2/28/2018 2:34:50 PM | User entered value |

## Events

| Time    | Event                  | Water      | Acid       | Base       | Octanol    | pH    | dpH/dt   | pH R-squared | pH SD   | dpH/time           |
|---------|------------------------|------------|------------|------------|------------|-------|----------|--------------|---------|--------------------|
| 8:58.1  | Manual volume addition |            |            |            | 0.02500 mL |       |          |              |         |                    |
| 8:59.2  | Initial pH = 5.75      |            |            |            |            |       |          |              |         |                    |
| 11:51.1 | Data point 2           | 1.50000 mL | 0.00000 mL | 0.00437 mL | 0.02500 mL | 8.505 | -0.38369 | 0.99778      | 0.01897 | Time out at 32.0 s |
| 13:17.8 | Data point 3           | 1.50000 mL | 0.00002 mL | 0.00437 mL | 0.02500 mL | 6.831 | 0.01922  | 0.90141      | 0.00100 | Time out at 32.0 s |
| 14:20.5 | Data point 4           | 1.50000 mL | 0.00059 mL | 0.00437 mL | 0.02500 mL | 6.554 | 0.05114  | 0.99769      | 0.00253 | Time out at 32.0 s |
| 16:01.3 | Data point 5           | 1.50000 mL | 0.00132 mL | 0.00437 mL | 0.02500 mL | 6.372 | 0.07459  | 0.99483      | 0.00369 | Time out at 32.0 s |
| 17:37.0 | Data point 6           | 1.50000 mL | 0.00216 mL | 0.00437 mL | 0.02500 mL | 6.212 | 0.09858  | 0.99770      | 0.00487 | Time out at 32.0 s |
| 19:02.5 | Data point 7           | 1.50000 mL | 0.00252 mL | 0.00437 mL | 0.02500 mL | 6.270 | 0.08713  | 0.99504      | 0.00431 | Time out at 32.0 s |
| 20:27.8 | Data point 8           | 1.50000 mL | 0.00287 mL | 0.00437 mL | 0.02500 mL | 6.267 | 0.08243  | 0.99748      | 0.00408 | Time out at 32.0 s |
| 21:53.3 | Data point 9           | 1.50000 mL | 0.00320 mL | 0.00437 mL | 0.02500 mL | 6.255 | 0.08261  | 0.99774      | 0.00409 | Time out at 32.0 s |
| 23:18.7 | Data point 10          | 1.50000 mL | 0.00353 mL | 0.00437 mL | 0.02500 mL | 6.212 | 0.07670  | 0.99623      | 0.00380 | Time out at 32.0 s |
| 24:44.1 | Data point 11          | 1.50000 mL | 0.00388 mL | 0.00437 mL | 0.02500 mL | 6.152 | 0.08592  | 0.99776      | 0.00425 | Time out at 32.0 s |
| 26:09.5 | Data point 12          | 1.50000 mL | 0.00426 mL | 0.00437 mL | 0.02500 mL | 6.040 | 0.08353  | 0.99742      | 0.00413 | Time out at 32.0 s |
| 27:34.9 | Data point 13          | 1.50000 mL | 0.00466 mL | 0.00437 mL | 0.02500 mL | 5.906 | 0.08469  | 0.99736      | 0.00419 | Time out at 32.0 s |
| 29:00.3 | Data point 14          | 1.50000 mL | 0.00508 mL | 0.00437 mL | 0.02500 mL | 5.655 | 0.08514  | 0.99629      | 0.00421 | Time out at 32.0 s |

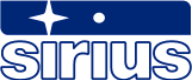

## Assay Events

Sample name: **M08\_octanol**  
Assay name: **pH-metric high logP**  
Assay ID: **18B-28014**  
Filename: **G:\OpenLab\_PFA\_Sirius-T3-2\Data2018\18B-28014\_M08\_octanol\_pH-metric high logP.t3r**

Experiment start time: **2/28/2018 9:57:03 PM**  
Analyst: **Pion**  
Instrument ID: **T312060**

## Events (continued)

| Time      | Event         | Water      | Acid       | Base       | Octanol    | pH     | dpH/dt   | pH R-squared | pH SD   | dpH/dt time         |
|-----------|---------------|------------|------------|------------|------------|--------|----------|--------------|---------|---------------------|
| 30:25.6   | Data point 15 | 1.50000 mL | 0.00550 mL | 0.00437 mL | 0.02500 mL | 5.102  | 0.04617  | 0.99374      | 0.00229 | Timed out at 59.5 s |
| 31:51.0   | Data point 16 | 1.50000 mL | 0.00576 mL | 0.00437 mL | 0.02500 mL | 4.592  | 0.01831  | 0.87650      | 0.00097 | 24.0 s              |
| 32:50.6   | Data point 17 | 1.50000 mL | 0.00593 mL | 0.00437 mL | 0.02500 mL | 4.356  | 0.01879  | 0.87405      | 0.00099 | 16.0 s              |
| 33:32.0   | Data point 18 | 1.50000 mL | 0.00604 mL | 0.00437 mL | 0.02500 mL | 4.163  | 0.01848  | 0.95772      | 0.00093 | 13.5 s              |
| 34:16.1   | Data point 19 | 1.50000 mL | 0.00623 mL | 0.00437 mL | 0.02500 mL | 3.955  | 0.01959  | 0.95038      | 0.00099 | 13.0 s              |
| 35:10.1   | Data point 20 | 1.50000 mL | 0.00654 mL | 0.00437 mL | 0.02500 mL | 3.739  | 0.01840  | 0.93630      | 0.00094 | 10.0 s              |
| 35:45.5   | Data point 21 | 1.50000 mL | 0.00698 mL | 0.00437 mL | 0.02500 mL | 3.515  | 0.01107  | 0.91474      | 0.00057 | 10.0 s              |
| 36:20.9   | Data point 22 | 1.50000 mL | 0.00771 mL | 0.00437 mL | 0.02500 mL | 3.301  | -0.00792 | 0.20574      | 0.00086 | 10.0 s              |
| 36:56.3   | Data point 23 | 1.50000 mL | 0.00889 mL | 0.00437 mL | 0.02500 mL | 3.086  | -0.00002 | 0.00010      | 0.00009 | 10.0 s              |
| 37:31.8   | Data point 24 | 1.50000 mL | 0.01082 mL | 0.00437 mL | 0.02500 mL | 2.873  | -0.00479 | 0.63485      | 0.00030 | 10.5 s              |
| 38:07.8   | Data point 25 | 1.50000 mL | 0.01399 mL | 0.00437 mL | 0.02500 mL | 2.674  | -0.01143 | 0.54403      | 0.00077 | 10.0 s              |
| 38:43.4   | Data point 26 | 1.50000 mL | 0.01905 mL | 0.00437 mL | 0.02500 mL | 2.478  | -0.01045 | 0.80609      | 0.00057 | 10.0 s              |
| 39:19.0   | Data point 27 | 1.50000 mL | 0.02705 mL | 0.00437 mL | 0.02500 mL | 2.280  | -0.01095 | 0.68427      | 0.00065 | 10.0 s              |
| 39:54.7   | Data point 28 | 1.50000 mL | 0.03991 mL | 0.00437 mL | 0.02500 mL | 2.076  | -0.01774 | 0.88391      | 0.00093 | 10.5 s              |
| 40:31.0   | Data point 29 | 1.50000 mL | 0.05256 mL | 0.00437 mL | 0.02500 mL | 1.944  | -0.01689 | 0.91021      | 0.00087 | 10.0 s              |
| 41:34.8   | Data point 30 | 1.50000 mL | 0.05256 mL | 0.06058 mL | 0.06500 mL | 10.463 | 0.01671  | 0.80475      | 0.00092 | 55.5 s              |
| 43:06.2   | Data point 31 | 1.50000 mL | 0.05299 mL | 0.06058 mL | 0.06500 mL | 10.105 | -0.00088 | 0.00194      | 0.00098 | 30.0 s              |
| 44:01.6   | Data point 32 | 1.50000 mL | 0.05325 mL | 0.06058 mL | 0.06500 mL | 9.808  | -0.01675 | 0.76998      | 0.00094 | 37.0 s              |
| 45:09.2   | Data point 33 | 1.50000 mL | 0.05343 mL | 0.06058 mL | 0.06500 mL | 9.543  | -0.01717 | 0.74125      | 0.00098 | 41.5 s              |
| 46:26.4   | Data point 34 | 1.50000 mL | 0.05357 mL | 0.06058 mL | 0.06500 mL | 9.285  | -0.00869 | 0.87535      | 0.00046 | 10.0 s              |
| 47:12.0   | Data point 35 | 1.50000 mL | 0.05369 mL | 0.06058 mL | 0.06500 mL | 8.988  | 0.00397  | 0.06470      | 0.00077 | 10.0 s              |
| 47:57.7   | Data point 36 | 1.50000 mL | 0.05379 mL | 0.06058 mL | 0.06500 mL | 8.634  | 0.01554  | 0.63385      | 0.00096 | 13.0 s              |
| 48:46.3   | Data point 37 | 1.50000 mL | 0.05386 mL | 0.06058 mL | 0.06500 mL | 8.268  | 0.01699  | 0.72054      | 0.00099 | 16.0 s              |
| 49:38.0   | Data point 38 | 1.50000 mL | 0.05393 mL | 0.06058 mL | 0.06500 mL | 7.860  | 0.01563  | 0.77436      | 0.00088 | 18.0 s              |
| 50:26.5   | Data point 39 | 1.50000 mL | 0.05402 mL | 0.06058 mL | 0.06500 mL | 7.583  | 0.01366  | 0.60795      | 0.00087 | 17.5 s              |
| 51:19.7   | Data point 40 | 1.50000 mL | 0.05416 mL | 0.06058 mL | 0.06500 mL | 7.337  | 0.01707  | 0.87652      | 0.00090 | 17.5 s              |
| 52:18.0   | Data point 41 | 1.50000 mL | 0.05435 mL | 0.06058 mL | 0.06500 mL | 7.132  | 0.01352  | 0.65718      | 0.00082 | 15.0 s              |
| 53:19.0   | Data point 42 | 1.50000 mL | 0.05463 mL | 0.06058 mL | 0.06500 mL | 6.929  | 0.01590  | 0.72033      | 0.00093 | 18.0 s              |
| 54:12.7   | Data point 43 | 1.50000 mL | 0.05499 mL | 0.06058 mL | 0.06500 mL | 6.745  | 0.01686  | 0.80981      | 0.00093 | 15.0 s              |
| 54:53.1   | Data point 44 | 1.50000 mL | 0.05541 mL | 0.06058 mL | 0.06500 mL | 6.570  | 0.01319  | 0.58565      | 0.00085 | 15.0 s              |
| 55:33.5   | Data point 45 | 1.50000 mL | 0.05597 mL | 0.06058 mL | 0.06500 mL | 6.408  | 0.01755  | 0.91751      | 0.00090 | 16.0 s              |
| 56:30.4   | Data point 46 | 1.50000 mL | 0.05680 mL | 0.06058 mL | 0.06500 mL | 6.222  | 0.01824  | 0.88012      | 0.00096 | 14.0 s              |
| 57:25.4   | Data point 47 | 1.50000 mL | 0.05767 mL | 0.06058 mL | 0.06500 mL | 6.032  | 0.01601  | 0.70284      | 0.00094 | 13.0 s              |
| 58:03.8   | Data point 48 | 1.50000 mL | 0.05854 mL | 0.06058 mL | 0.06500 mL | 5.832  | 0.01586  | 0.73469      | 0.00091 | 12.0 s              |
| 58:41.4   | Data point 49 | 1.50000 mL | 0.05941 mL | 0.06058 mL | 0.06500 mL | 5.634  | 0.01736  | 0.78548      | 0.00097 | 12.0 s              |
| 59:18.8   | Data point 50 | 1.50000 mL | 0.06018 mL | 0.06058 mL | 0.06500 mL | 5.490  | 0.10872  | 0.99860      | 0.00537 | Timed out at 59.5 s |
| 1:00:59.7 | Data point 51 | 1.50000 mL | 0.06098 mL | 0.06058 mL | 0.06500 mL | 5.576  | 0.16163  | 0.99800      | 0.00799 | Timed out at 59.5 s |
| 1:02:25.1 | Data point 52 | 1.50000 mL | 0.06138 mL | 0.06058 mL | 0.06500 mL | 5.597  | 0.09780  | 0.99796      | 0.00484 | Timed out at 59.5 s |
| 1:03:50.6 | Data point 53 | 1.50000 mL | 0.06178 mL | 0.06058 mL | 0.06500 mL | 5.164  | 0.03874  | 0.98187      | 0.00193 | Timed out at 59.5 s |
| 1:05:15.9 | Data point 54 | 1.50000 mL | 0.06199 mL | 0.06058 mL | 0.06500 mL | 4.871  | 0.01890  | 0.95104      | 0.00096 | 37.5 s              |
| 1:06:24.0 | Data point 55 | 1.50000 mL | 0.06216 mL | 0.06058 mL | 0.06500 mL | 4.605  | 0.02009  | 0.98775      | 0.00100 | 22.5 s              |
| 1:07:17.2 | Data point 56 | 1.50000 mL | 0.06230 mL | 0.06058 mL | 0.06500 mL | 4.379  | 0.01733  | 0.86039      | 0.00092 | 15.5 s              |
| 1:08:03.2 | Data point 57 | 1.50000 mL | 0.06254 mL | 0.06058 mL | 0.06500 mL | 4.117  | 0.01748  | 0.84391      | 0.00094 | 14.0 s              |
| 1:08:47.7 | Data point 58 | 1.50000 mL | 0.06277 mL | 0.06058 mL | 0.06500 mL | 3.910  | 0.01951  | 0.98119      | 0.00097 | 12.5 s              |
| 1:09:25.6 | Data point 59 | 1.50000 mL | 0.06312 mL | 0.06058 mL | 0.06500 mL | 3.670  | 0.01603  | 0.74774      | 0.00092 | 10.0 s              |
| 1:10:16.5 | Data point 60 | 1.50000 mL | 0.06376 mL | 0.06058 mL | 0.06500 mL | 3.462  | 0.00750  | 0.80522      | 0.00041 | 10.0 s              |
| 1:10:52.0 | Data point 61 | 1.50000 mL | 0.06463 mL | 0.06058 mL | 0.06500 mL | 3.238  | -0.00145 | 0.00710      | 0.00085 | 10.0 s              |
| 1:11:27.4 | Data point 62 | 1.50000 mL | 0.06609 mL | 0.06058 mL | 0.06500 mL | 3.035  | -0.00146 | 0.02277      | 0.00048 | 10.5 s              |
| 1:12:03.4 | Data point 63 | 1.50000 mL | 0.06841 mL | 0.06058 mL | 0.06500 mL | 2.831  | -0.00808 | 0.27293      | 0.00076 | 10.0 s              |
| 1:12:38.9 | Data point 64 | 1.50000 mL | 0.07218 mL | 0.06058 mL | 0.06500 mL | 2.624  | -0.00574 | 0.80349      | 0.00032 | 10.0 s              |
| 1:13:14.6 | Data point 65 | 1.50000 mL | 0.07832 mL | 0.06058 mL | 0.06500 mL | 2.413  | -0.00805 | 0.73778      | 0.00046 | 10.0 s              |
| 1:13:50.2 | Data point 66 | 1.50000 mL | 0.08841 mL | 0.06058 mL | 0.06500 mL | 2.216  | -0.00955 | 0.79291      | 0.00053 | 10.0 s              |

Sample name: **M08\_octanol**  
 Assay name: **pH-metric high logP**  
 Assay ID: **18B-28014**  
 Filename: **G:\OpenLab\_PFA\_Sirius-T3-2\Data2018\18B-28014\_M08\_octanol\_pH-metric high logP.t3r**

Experiment start time: **2/28/2018 9:57:03 PM**  
 Analyst: **Pion**  
 Instrument ID: **T312060**

## Events (continued)

| Time      | Event          | Water      | Acid       | Base       | Octanol    | pH     | dpH/dt   | pH R-squared | pH SD   | dpH/dt time         |
|-----------|----------------|------------|------------|------------|------------|--------|----------|--------------|---------|---------------------|
| 1:14:26.0 | Data point 67  | 1.50000 mL | 0.10463 mL | 0.06058 mL | 0.06500 mL | 2.013  | -0.01476 | 0.90024      | 0.00077 | 10.0 s              |
| 1:15:01.6 | Data point 68  | 1.50000 mL | 0.11218 mL | 0.06058 mL | 0.06500 mL | 1.944  | -0.00748 | 0.85449      | 0.00040 | 10.0 s              |
| 1:16:32.0 | Data point 69  | 1.50000 mL | 0.11218 mL | 0.12131 mL | 0.56500 mL | 10.638 | -0.02692 | 0.97300      | 0.00135 | Timed out at 59.5 s |
| 1:18:07.8 | Data point 70  | 1.50000 mL | 0.11291 mL | 0.12131 mL | 0.56500 mL | 10.418 | -0.01629 | 0.90234      | 0.00085 | 10.5 s              |
| 1:18:43.7 | Data point 71  | 1.50000 mL | 0.11341 mL | 0.12131 mL | 0.56500 mL | 10.185 | -0.00481 | 0.66052      | 0.00029 | 10.0 s              |
| 1:19:29.4 | Data point 72  | 1.50000 mL | 0.11378 mL | 0.12131 mL | 0.56500 mL | 9.973  | 0.00415  | 0.69795      | 0.00025 | 10.0 s              |
| 1:20:04.7 | Data point 73  | 1.50000 mL | 0.11399 mL | 0.12131 mL | 0.56500 mL | 9.775  | 0.00051  | 0.00415      | 0.00039 | 10.0 s              |
| 1:20:40.0 | Data point 74  | 1.50000 mL | 0.11414 mL | 0.12131 mL | 0.56500 mL | 9.625  | 0.01049  | 0.80316      | 0.00058 | 10.0 s              |
| 1:21:20.4 | Data point 75  | 1.50000 mL | 0.11430 mL | 0.12131 mL | 0.56500 mL | 9.413  | 0.01849  | 0.91674      | 0.00095 | 16.5 s              |
| 1:22:12.7 | Data point 76  | 1.50000 mL | 0.11444 mL | 0.12131 mL | 0.56500 mL | 9.196  | 0.01358  | 0.49556      | 0.00095 | 17.5 s              |
| 1:23:05.8 | Data point 77  | 1.50000 mL | 0.11456 mL | 0.12131 mL | 0.56500 mL | 8.994  | 0.01898  | 0.97137      | 0.00095 | 12.0 s              |
| 1:23:58.6 | Data point 78  | 1.50000 mL | 0.11468 mL | 0.12131 mL | 0.56500 mL | 8.773  | 0.00423  | 0.05467      | 0.00089 | 19.5 s              |
| 1:25:04.0 | Data point 79  | 1.50000 mL | 0.11479 mL | 0.12131 mL | 0.56500 mL | 8.540  | 0.01751  | 0.95118      | 0.00089 | 15.5 s              |
| 1:26:00.5 | Data point 80  | 1.50000 mL | 0.11491 mL | 0.12131 mL | 0.56500 mL | 8.327  | 0.00999  | 0.26899      | 0.00095 | 18.5 s              |
| 1:26:59.9 | Data point 81  | 1.50000 mL | 0.11505 mL | 0.12131 mL | 0.56500 mL | 8.125  | 0.00630  | 0.12857      | 0.00087 | 20.0 s              |
| 1:28:05.9 | Data point 82  | 1.50000 mL | 0.11526 mL | 0.12131 mL | 0.56500 mL | 7.904  | 0.00961  | 0.25771      | 0.00093 | 19.5 s              |
| 1:29:11.3 | Data point 83  | 1.50000 mL | 0.11557 mL | 0.12131 mL | 0.56500 mL | 7.692  | 0.01317  | 0.53307      | 0.00089 | 20.5 s              |
| 1:30:17.8 | Data point 84  | 1.50000 mL | 0.11602 mL | 0.12131 mL | 0.56500 mL | 7.484  | 0.01066  | 0.33152      | 0.00091 | 19.5 s              |
| 1:31:18.1 | Data point 85  | 1.50000 mL | 0.11658 mL | 0.12131 mL | 0.56500 mL | 7.286  | 0.01482  | 0.73005      | 0.00086 | 20.5 s              |
| 1:32:24.8 | Data point 86  | 1.50000 mL | 0.11736 mL | 0.12131 mL | 0.56500 mL | 7.089  | 0.01351  | 0.56423      | 0.00089 | 19.5 s              |
| 1:33:30.4 | Data point 87  | 1.50000 mL | 0.11820 mL | 0.12131 mL | 0.56500 mL | 6.896  | 0.01748  | 0.83538      | 0.00095 | 20.0 s              |
| 1:34:31.3 | Data point 88  | 1.50000 mL | 0.11905 mL | 0.12131 mL | 0.56500 mL | 6.712  | 0.01401  | 0.48910      | 0.00099 | 19.0 s              |
| 1:35:31.3 | Data point 89  | 1.50000 mL | 0.11987 mL | 0.12131 mL | 0.56500 mL | 6.525  | 0.00912  | 0.22976      | 0.00094 | 19.5 s              |
| 1:36:31.7 | Data point 90  | 1.50000 mL | 0.12070 mL | 0.12131 mL | 0.56500 mL | 6.300  | 0.01131  | 0.37052      | 0.00092 | 19.5 s              |
| 1:37:27.0 | Data point 91  | 1.50000 mL | 0.12124 mL | 0.12131 mL | 0.56500 mL | 6.113  | 0.01242  | 0.37784      | 0.00100 | 17.5 s              |
| 1:38:09.9 | Data point 92  | 1.50000 mL | 0.12168 mL | 0.12131 mL | 0.56500 mL | 5.877  | 0.01326  | 0.59032      | 0.00085 | 18.0 s              |
| 1:38:53.3 | Data point 93  | 1.50000 mL | 0.12211 mL | 0.12131 mL | 0.56500 mL | 5.536  | 0.01531  | 0.70704      | 0.00090 | 16.5 s              |
| 1:39:35.3 | Data point 94  | 1.50000 mL | 0.12241 mL | 0.12131 mL | 0.56500 mL | 5.126  | 0.01004  | 0.33249      | 0.00086 | 15.5 s              |
| 1:40:16.1 | Data point 95  | 1.50000 mL | 0.12258 mL | 0.12131 mL | 0.56500 mL | 4.862  | 0.01660  | 0.85540      | 0.00089 | 14.0 s              |
| 1:40:55.6 | Data point 96  | 1.50000 mL | 0.12270 mL | 0.12131 mL | 0.56500 mL | 4.655  | 0.01286  | 0.68795      | 0.00077 | 12.5 s              |
| 1:41:43.7 | Data point 97  | 1.50000 mL | 0.12284 mL | 0.12131 mL | 0.56500 mL | 4.442  | 0.01567  | 0.70157      | 0.00092 | 12.0 s              |
| 1:42:31.3 | Data point 98  | 1.50000 mL | 0.12300 mL | 0.12131 mL | 0.56500 mL | 4.233  | 0.00457  | 0.07507      | 0.00082 | 11.0 s              |
| 1:43:17.9 | Data point 99  | 1.50000 mL | 0.12321 mL | 0.12131 mL | 0.56500 mL | 4.023  | 0.01009  | 0.34406      | 0.00085 | 10.5 s              |
| 1:43:53.8 | Data point 100 | 1.50000 mL | 0.12352 mL | 0.12131 mL | 0.56500 mL | 3.800  | 0.00859  | 0.33185      | 0.00074 | 10.0 s              |
| 1:44:29.3 | Data point 101 | 1.50000 mL | 0.12397 mL | 0.12131 mL | 0.56500 mL | 3.606  | 0.01096  | 0.49543      | 0.00077 | 10.0 s              |
| 1:45:04.7 | Data point 102 | 1.50000 mL | 0.12465 mL | 0.12131 mL | 0.56500 mL | 3.415  | -0.00112 | 0.00437      | 0.00083 | 10.0 s              |
| 1:45:40.2 | Data point 103 | 1.50000 mL | 0.12571 mL | 0.12131 mL | 0.56500 mL | 3.225  | -0.00516 | 0.50756      | 0.00036 | 10.0 s              |
| 1:46:15.7 | Data point 104 | 1.50000 mL | 0.12733 mL | 0.12131 mL | 0.56500 mL | 3.035  | 0.00000  | 0.00000      | 0.00038 | 10.0 s              |
| 1:46:51.1 | Data point 105 | 1.50000 mL | 0.12984 mL | 0.12131 mL | 0.56500 mL | 2.835  | -0.01164 | 0.95088      | 0.00059 | 10.0 s              |
| 1:47:26.7 | Data point 106 | 1.50000 mL | 0.13389 mL | 0.12131 mL | 0.56500 mL | 2.621  | -0.00308 | 0.11765      | 0.00044 | 10.0 s              |
| 1:48:02.3 | Data point 107 | 1.50000 mL | 0.14052 mL | 0.12131 mL | 0.56500 mL | 2.411  | -0.01254 | 0.94329      | 0.00064 | 10.0 s              |
| 1:48:38.0 | Data point 108 | 1.50000 mL | 0.15139 mL | 0.12131 mL | 0.56500 mL | 2.215  | -0.01773 | 0.98451      | 0.00088 | 10.0 s              |
| 1:49:13.9 | Data point 109 | 1.50000 mL | 0.16900 mL | 0.12131 mL | 0.56500 mL | 2.009  | -0.01817 | 0.96311      | 0.00091 | 10.5 s              |
| 1:49:50.1 | Data point 110 | 1.50000 mL | 0.17679 mL | 0.12131 mL | 0.56500 mL | 1.942  | -0.01341 | 0.97758      | 0.00067 | 10.5 s              |
| 1:50:09.6 | Assay volumes  | 1.50000 mL | 0.17679 mL | 0.12131 mL | 0.56500 mL |        |          |              |         |                     |





Sample name: **M08\_octanol** Experiment start time: **2/28/2018 9:57:03 PM**  
Assay name: **pH-metric high logP** Analyst: **Pion**  
Assay ID: **18B-28014** Instrument ID: **T312060**  
Filename: **G:\OpenLab\_PFA\_Sirius-T3-2\Data2018\18B-28014\_M08\_octanol\_pH-metric high logP.t3r**

**Assay Settings**

| Setting                             | Value              | Original Value | Date/Time changed | Imported from |
|-------------------------------------|--------------------|----------------|-------------------|---------------|
| <b>General Settings</b>             |                    |                |                   |               |
| Analyst name                        | Pion               |                |                   |               |
| <b>Standard Experiment Settings</b> |                    |                |                   |               |
| Number of titrations                | 3                  |                |                   |               |
| Minimum pH                          | 2.000              |                |                   |               |
| Maximum pH                          | 10.000             |                |                   |               |
| pH step between points of           | 0.200              |                |                   |               |
| Minimum titrant addition            | 0.00002 mL         |                |                   |               |
| Maximum titrant addition            | 0.10000 mL         |                |                   |               |
| Argon flow rate                     | 100%               |                |                   |               |
| Start titration using               | Cautious pH adjust |                |                   |               |
| <b>Advanced General Settings</b>    |                    |                |                   |               |
| Detect turbidity using              | None               |                |                   |               |
| Collect turbidity sensor data       | No                 |                |                   |               |
| Collect UV spectra                  | No                 |                |                   |               |
| Stir after titrant addition for     | 5 seconds          |                |                   |               |
| For titrant addition, stir at       | 10%                |                |                   |               |
| <b>Titration Pre-Dose</b>           |                    |                |                   |               |
| Titration pre-dose                  | None               |                |                   |               |
| <b>Assay Medium</b>                 |                    |                |                   |               |
| ISA water volume                    | 1.50 mL            |                |                   |               |
| Water added                         | Automatic          |                |                   |               |
| Partition solvent type              | Octanol            |                |                   |               |
| Partition volume                    | 0.025 mL           |                |                   |               |
| Partition solvent added             | Manual in advance  |                |                   |               |
| After partition addition, stir for  | 1 seconds          |                |                   |               |
| <b>Sample Sonication</b>            |                    |                |                   |               |
| Sonicate                            | Yes                |                |                   |               |
| Adjust pH for sonication            | No                 |                |                   |               |
| Sonicate for                        | 300 seconds        |                |                   |               |
| After sonication stir for           | 5 seconds          |                |                   |               |
| <b>Sample Dissolution</b>           |                    |                |                   |               |
| Perform a dissolution stage         | Yes                |                |                   |               |
| Adjust and hold pH for dissolution  | To start pH        |                |                   |               |
| Stir to dissolve for                | 120 seconds        |                |                   |               |
| For dissolution, stir at            | 10%                |                |                   |               |
| <b>Carbonate purge</b>              |                    |                |                   |               |
| Perform a carbonate purge           | No                 |                |                   |               |
| <b>Temperature Control</b>          |                    |                |                   |               |
| Wait for temperature                | Yes                |                |                   |               |
| Required start temperature          | 25.0°C             |                |                   |               |
| Acceptable deviation                | 0.5°C              |                |                   |               |
| Time to wait                        | 60 seconds         |                |                   |               |
| Stir speed of                       | 50%                |                |                   |               |
| <b>Titration 1</b>                  |                    |                |                   |               |
| Titrate from                        | High to low pH     |                |                   |               |
| Adjust to start pH                  | Yes                |                |                   |               |
| After pH adjust stir for            | 30 seconds         |                |                   |               |
| Stir to allow partitioning for      | 15 seconds         |                |                   |               |
| Stirrer speed for partitioning      | 50%                |                |                   |               |
| <b>Titration 2</b>                  |                    |                |                   |               |
| Titrate from                        | High to low pH     |                |                   |               |
| Add additional water                | 0.00 mL            |                |                   |               |
| Additional partition solvent volume | 0.040 mL           |                |                   |               |
| Additional partition solvent added  | Automatic          |                |                   |               |
| After pH adjust stir for            | 30 seconds         |                |                   |               |
| Stir to allow partitioning for      | 15 seconds         |                |                   |               |
| Stirrer speed for partitioning      | 55%                |                |                   |               |





## Assay Settings

Sample name: **M08\_octanol** Experiment start time: **2/28/2018 9:57:03 PM**  
Assay name: **pH-metric high logP** Analyst: **Pion**  
Assay ID: **18B-28014** Instrument ID: **T312060**  
Filename: **G:\OpenLab\_PFA\_Sirius-T3-2\Data2018\18B-28014\_M08\_octanol\_pH-metric high logP.t3r**

## Assay Settings (continued)

| Setting                             | Value          | Original Value | Date/Time changed | Imported from |
|-------------------------------------|----------------|----------------|-------------------|---------------|
| <b>Titration 3</b>                  |                |                |                   |               |
| Titrate from                        | High to low pH |                |                   |               |
| Add additional water                | 0.00 mL        |                |                   |               |
| Additional partition solvent volume | 0.500 mL       |                |                   |               |
| Additional partition solvent added  | Automatic      |                |                   |               |
| After pH adjust stir for            | 30 seconds     |                |                   |               |
| Stir to allow partitioning for      | 15 seconds     |                |                   |               |
| Stirrer speed for partitioning      | 60%            |                |                   |               |
| <b>Data Point Stability</b>         |                |                |                   |               |
| Stir during data point collection   | No             |                |                   |               |
| Delay before data point collection  | 0 seconds      |                |                   |               |
| Number of points to average         | 20 points      |                |                   |               |
| Time interval between points        | 0.50 seconds   |                |                   |               |
| Required maximum standard deviation | 0.00100 dpH/dt |                |                   |               |
| Stability timeout after             | 60 seconds     |                |                   |               |

## Calibration Settings

| Setting                   | Value  | Date/Time changed    | Imported from             |
|---------------------------|--------|----------------------|---------------------------|
| Four-Plus alpha           | 0.130  | 2/28/2018 9:57:03 PM | C:\Sirius_T3\HCl18B27.t3r |
| Four-Plus S               | 0.9970 | 2/28/2018 9:57:03 PM | C:\Sirius_T3\HCl18B27.t3r |
| Four-Plus jH              | 0.8    | 2/28/2018 9:57:03 PM | C:\Sirius_T3\HCl18B27.t3r |
| Four-Plus jOH             | -0.4   | 2/28/2018 9:57:03 PM | C:\Sirius_T3\HCl18B27.t3r |
| Base concentration factor | 1.000  | 2/28/2018 9:57:03 PM | C:\Sirius_T3\KOH18B27.t3r |
| Acid concentration factor | 0.994  | 2/28/2018 9:57:03 PM | C:\Sirius_T3\HCl18B27.t3r |

## Instrument Settings

| Setting              | Value                      | Batch Id    | Install date           |
|----------------------|----------------------------|-------------|------------------------|
| Instrument owner     | Merck                      |             |                        |
| Instrument ID        | T312060                    |             |                        |
| Instrument type      | T3 Simulator               |             |                        |
| Software version     | 1.1.3.0                    |             |                        |
| Dispenser module     |                            | T3DM1200361 | 3/31/2009 6:24:52 AM   |
| Dispenser 0          | Water                      |             | 3/31/2009 6:25:05 AM   |
| Syringe volume       | 2.5 mL                     |             |                        |
| Firmware version     | 1.2.1(r2)                  |             |                        |
| Titrant              | Water (0.15 M KCl)         | 02-06-2018  | 2/27/2018 11:05:59 AM  |
| Dispenser 2          | Acid                       |             | 3/31/2009 6:25:11 AM   |
| Syringe volume       | 0.5 mL                     |             |                        |
| Firmware version     | 1.2.1(r2)                  |             |                        |
| Titrant              | Acid (0.5 M HCl)           | 02-27-2018  | 2/27/2018 11:27:22 AM  |
| Dispenser 1          | Base                       |             | 3/31/2009 6:25:21 AM   |
| Syringe volume       | 0.5 mL                     |             |                        |
| Firmware version     | 1.2.1(r2)                  |             |                        |
| Titrant              | Base (0.5 M KOH)           | 9/22/2017   | 2/27/2018 11:21:22 AM  |
| Dispenser 5          | Cosolvent                  |             | 3/31/2009 6:26:24 AM   |
| Syringe volume       | 2.5 mL                     |             |                        |
| Firmware version     | 1.2.1(r2)                  |             |                        |
| Distribution valve 5 | Distribution Valve         |             | 3/31/2009 6:28:19 AM   |
| Firmware version     | 1.1.3                      |             |                        |
| Port A               | Methanol (80%, 0.15 M KCl) | 09-26-17    | 2/7/2018 10:42:01 AM   |
| Port B               | Cyclohexane                | 11-01-17    | 2/27/2018 11:37:57 AM  |
| Dispenser 3          | Buffer                     |             | 8/3/2010 6:05:16 AM    |
| Syringe volume       | 0.5 mL                     |             |                        |
| Firmware version     | 1.2.1(r2)                  |             |                        |
| Titrant              | Dodecane                   | 2018/01/31  | 2/28/2018 11:18:04 AM  |
| Dispenser 6          | Octanol                    |             | 10/22/2010 11:52:43 AM |

Sample name: **M08\_octanol**  
 Assay name: **pH-metric high logP**  
 Assay ID: **18B-28014**  
 Filename: **G:\OpenLab\_PFA\_Sirius-T3-2\Data2018\18B-28014\_M08\_octanol\_pH-metric high logP.t3r**

Experiment start time: **2/28/2018 9:57:03 PM**  
 Analyst: **Pion**  
 Instrument ID: **T312060**

## Instrument Settings (continued)

| Setting                                   | Value                      | Batch Id    | Install date           |
|-------------------------------------------|----------------------------|-------------|------------------------|
| Syringe volume                            | 0.5 mL                     |             |                        |
| Firmware version                          | 1.2.1(r2)                  |             |                        |
| Titration                                 | Octanol                    | 01-31-2018  | 2/27/2018 10:59:35 AM  |
| Titration                                 |                            | T3TM1200161 | 3/31/2009 6:24:17 AM   |
| Horizontal axis firmware version          | 1.17 AI1DI2DO2 Stepper 2   |             |                        |
| Vertical axis firmware version            | 1.17 AI1DI2DO2 Stepper 2   |             |                        |
| Chassis I/O firmware version              | 1.11 AI1DI0DO4 Norgren I/O |             |                        |
| Probe I/O firmware version                | 1.1.1                      |             |                        |
| Electrode                                 | T3 Electrode               | T3E0923     | 1/23/2018 3:01:00 PM   |
| E0 calibration                            | +3.66 mV                   |             | 2/28/2018 9:57:31 PM   |
| Filling solution                          | 3M KCl                     | KCL097      | 2/27/2018 10:49:43 AM  |
| Liquids                                   |                            |             |                        |
| Wash 1                                    | 50% IPA:50% Water          |             | 2/28/2018 11:23:32 AM  |
| Wash 2                                    | 0.5% Triton X-100 in H2O   |             | 2/28/2018 11:23:34 AM  |
| Buffer position 1                         | pH7 Wash                   |             | 2/28/2018 11:24:06 AM  |
| Buffer position 2                         | pH 7                       |             | 2/28/2018 11:24:08 AM  |
| Storage position                          |                            |             | 2/28/2018 11:21:14 AM  |
| Wash water                                | 8.7e+003 mL                | 02-27-2018  | 2/27/2018 10:54:39 AM  |
| Waste                                     | 6.8e+003 mL                |             | 11/28/2017 11:36:29 AM |
| Temperature controller                    |                            |             | 8/5/2010 7:35:13 AM    |
| Turbidity detector                        |                            |             | 3/31/2009 6:24:45 AM   |
| Spectrometer                              |                            | 074811      | 11/23/2010 12:22:28 PM |
| Dip probe                                 |                            | 10196       |                        |
| Wavelength coefficient A0                 | 183.333                    |             |                        |
| Wavelength coefficient A1                 | 2.21568                    |             |                        |
| Wavelength coefficient A2                 | -0.000289308               |             |                        |
| Total lamp lit time                       | 112:08:55                  |             | 11/23/2010 12:22:28 PM |
| Calibrated on                             | 2/27/2018 11:40:38 AM      |             |                        |
| Integration time                          | 40                         |             |                        |
| Scans averaged                            | 10                         |             |                        |
| Autoloader                                |                            | T3AL1200345 | 11/10/2015 10:34:13 AM |
| Left-right axis firmware version          | 1.17 AI1DI2DO2 Stepper 2   |             |                        |
| Front-back axis firmware version          | 1.17 AI1DI2DO2 Stepper 2   |             |                        |
| Vertical axis firmware version            | 1.17 AI1DI2DO2 Stepper 2   |             |                        |
| Chassis I/O firmware version              | 1.11 AI1DI0DO4 Norgren I/O |             |                        |
| Configuration                             |                            |             |                        |
| Alternate titration position              | Titration position         |             |                        |
| Alternate reference position              | Reference position         |             |                        |
| Maximum standard vial volume              | 3.50 mL                    |             |                        |
| Maximum alternate vial volume             | 25.00 mL                   |             |                        |
| Automatic action idle period              | 5 minute(s)                |             |                        |
| Titration tube volume                     | 1.3 mL                     |             |                        |
| Syringe flush count                       | 3.50                       |             |                        |
| Flowing wash pump volume                  | 20.0 mL                    |             |                        |
| Flowing wash stir duration                | 5 s                        |             |                        |
| Flowing wash stir speed                   | 30%                        |             |                        |
| Solvent wash stir duration                | 5 s                        |             |                        |
| Solvent wash stir speed                   | 30%                        |             |                        |
| Surfactant wash stir duration             | 5 s                        |             |                        |
| Surfactant wash stir speed                | 30%                        |             |                        |
| E0 calibration minimum number of points   | 10                         |             |                        |
| E0 calibration maximum standard deviation | 0.01500                    |             |                        |
| E0 calibration timeout period             | 60 s                       |             |                        |
| E0 calibration stir duration              | 5 s                        |             |                        |
| E0 calibration preparation stir speed     | 30%                        |             |                        |
| E0 calibration buffer wash stir duration  | 5 s                        |             |                        |
| E0 calibration buffer wash stir speed     | 30%                        |             |                        |
| E0 calibration reading stir speed         | 0%                         |             |                        |

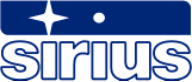

## Assay Settings

Sample name: **M08\_octanol** Experiment start time: **2/28/2018 9:57:03 PM**  
Assay name: **pH-metric high logP** Analyst: **Pion**  
Assay ID: **18B-28014** Instrument ID: **T312060**  
Filename: **G:\OpenLab\_PFA\_Sirius-T3-2\Data2018\18B-28014\_M08\_octanol\_pH-metric high logP.t3r**

### Instrument Settings (continued)

| Setting                                     | Value   | Batch Id | Install date |
|---------------------------------------------|---------|----------|--------------|
| Spectrometer calibration stir duration      | 5 s     |          |              |
| Spectrometer calibration stir speed         | 30%     |          |              |
| Spectrometer calibration wash pump volume   | 20.0 mL |          |              |
| Spectrometer calibration wash stir duration | 5 s     |          |              |
| Spectrometer calibration wash stir speed    | 30%     |          |              |
| Overhead dispense height                    | 10000   |          |              |

### Refinement Settings

| Setting                        | Value    | Default value |
|--------------------------------|----------|---------------|
| Turbidity detection method     | None     | None          |
| Turbidity wavelength to assess | 500.0 nm | 500.0 nm      |
| Turbidity maximum absorbance   | 0.100    | 0.100         |
| Turbidity probe threshold      | 50.00    | 50.00         |
