# Supplementary material for: Octanol-water partition coefficient measurements for the SAMPL6 Blind Prediction Challenge
Source: bioRxiv or medRxiv preprint supplement (doi:10.1101/757393), 2019-12-02
Supplement: Supplementary file [file media-2.zip]

Sample name: **M12\_octanol**  
 Assay name: **pH-metric high logP**  
 Assay ID: **18C-01012**  
 Filename: **C:\Sirius\_T3\Mehtap\20180228\_exp28\_logP\_T3-2\18C-01012\_M12\_octanol\_pH-metric high logP.t3r**

Experiment start time: **3/1/2018 3:28:52 PM**  
 Analyst: **Pion**  
 Instrument ID: **T312060**

## pH-metric Result

logP (XH +) 1.02 ±0.07 (n=50)  
 logP (neutral X) 3.79 ±0.02 (n=50)

### 18C-01012 Points 1 to 21

M12\_octanol concentration factor 0.790  
 Carbonate 0.0885 mM  
 Acidity error -0.75786 mM

### 18C-01012 Points 22 to 45

M12\_octanol concentration factor 0.666  
 Carbonate 0.1221 mM  
 Acidity error -0.39695 mM

### 18C-01012 Points 46 to 87

M12\_octanol concentration factor 0.461  
 Carbonate 1.9011 mM  
 Acidity error -0.34659 mM

## Warnings and errors

Errors None  
 Warnings Excessive carbonate concentration present

## Sample logD and percent species

| pH     | M12_octanol<br>logD | M12_octanol<br>M12_octanolH | M12_octanol<br>M12_octanol | M12_octanol<br>M12_octanolH* | M12_octanol<br>M12_octanol* | Comment    |
|--------|---------------------|-----------------------------|----------------------------|------------------------------|-----------------------------|------------|
| 1.000  | 1.04                | 8.40 %                      | 0.00 %                     | 88.90 %                      | 2.71 %                      | Stomach pH |
| 1.200  | 1.05                | 8.26 %                      | 0.00 %                     | 87.51 %                      | 4.23 %                      |            |
| 2.000  | 1.14                | 6.75 %                      | 0.00 %                     | 71.47 %                      | 21.78 %                     |            |
| 3.000  | 1.63                | 2.28 %                      | 0.01 %                     | 24.14 %                      | 73.56 %                     |            |
| 4.000  | 2.50                | 0.30 %                      | 0.02 %                     | 3.17 %                       | 96.52 %                     |            |
| 5.000  | 3.33                | 0.03 %                      | 0.02 %                     | 0.33 %                       | 99.63 %                     | Blood pH   |
| 6.000  | 3.71                | 0.00 %                      | 0.02 %                     | 0.03 %                       | 99.95 %                     |            |
| 6.500  | 3.76                | 0.00 %                      | 0.02 %                     | 0.01 %                       | 99.97 %                     |            |
| 7.000  | 3.78                | 0.00 %                      | 0.02 %                     | 0.00 %                       | 99.98 %                     |            |
| 7.400  | 3.79                | 0.00 %                      | 0.02 %                     | 0.00 %                       | 99.98 %                     |            |
| 8.000  | 3.79                | 0.00 %                      | 0.02 %                     | 0.00 %                       | 99.98 %                     |            |
| 9.000  | 3.79                | 0.00 %                      | 0.02 %                     | 0.00 %                       | 99.98 %                     |            |
| 10.000 | 3.79                | 0.00 %                      | 0.02 %                     | 0.00 %                       | 99.98 %                     |            |
| 11.000 | 3.79                | 0.00 %                      | 0.02 %                     | 0.00 %                       | 99.98 %                     |            |
| 12.000 | 3.79                | 0.00 %                      | 0.02 %                     | 0.00 %                       | 99.98 %                     |            |

Sample name: **M12\_octanol**  
 Assay name: **pH-metric high logP**  
 Assay ID: **18C-01012**  
 Filename: **C:\Sirius\_T3\Mehtap\20180228\_exp28\_logP\_T3-2\18C-01012\_M12\_octanol\_pH-metric high logP.t3r**

Experiment start time: **3/1/2018 3:28:52 PM**  
 Analyst: **Pion**  
 Instrument ID: **T312060**

## Graphs

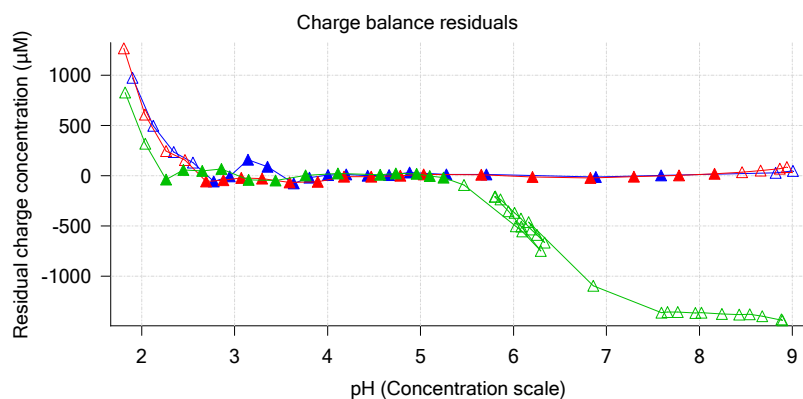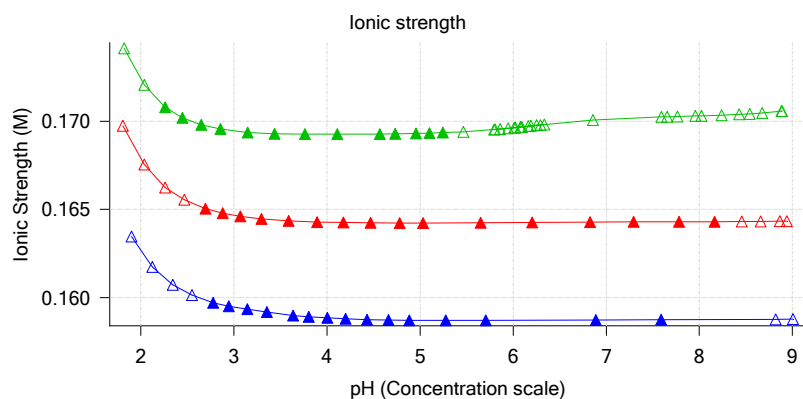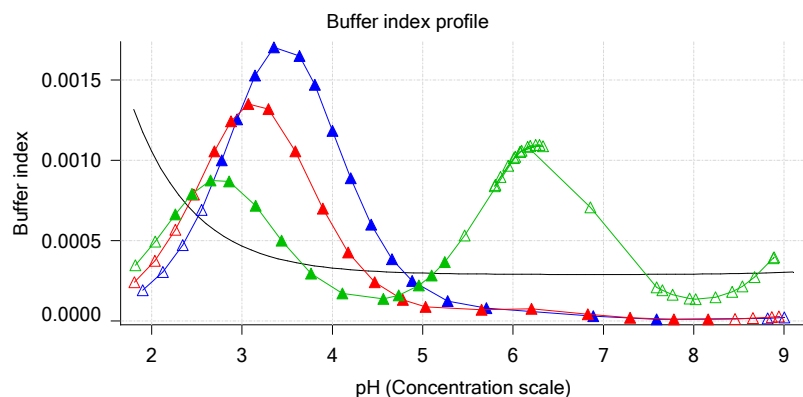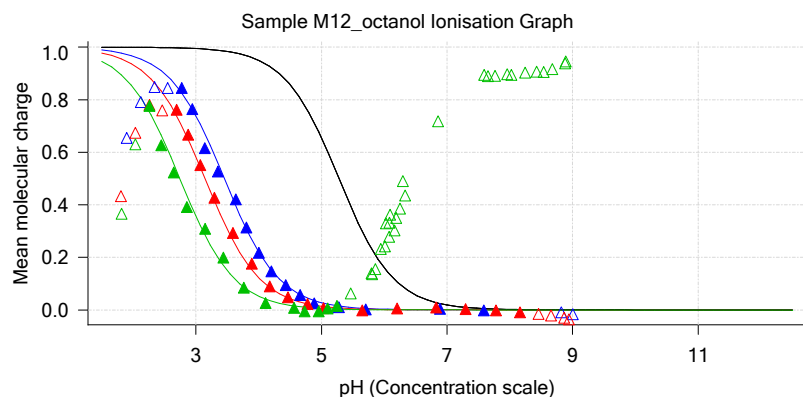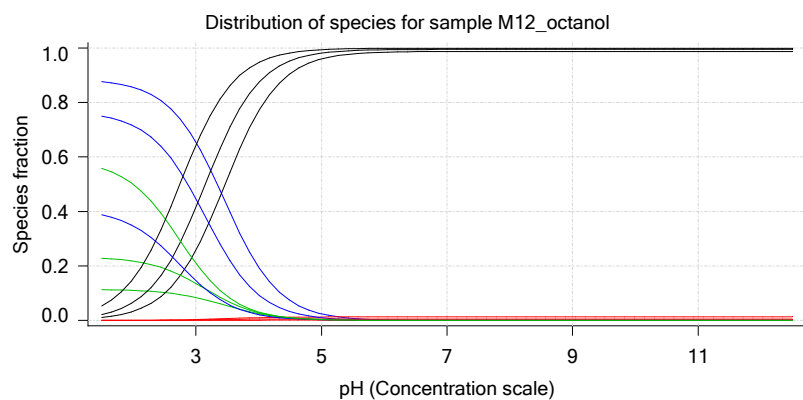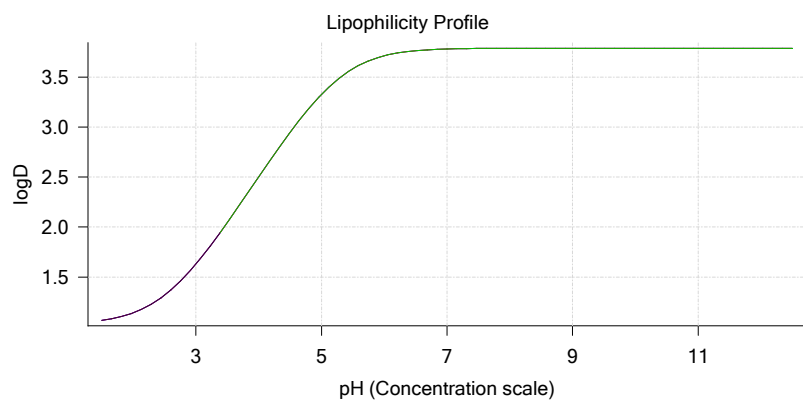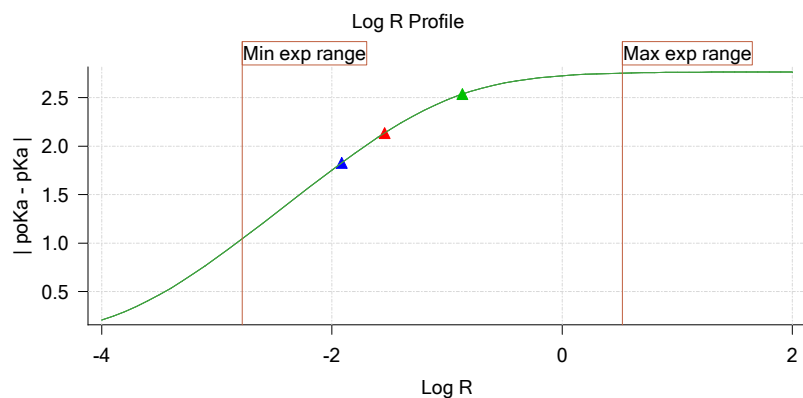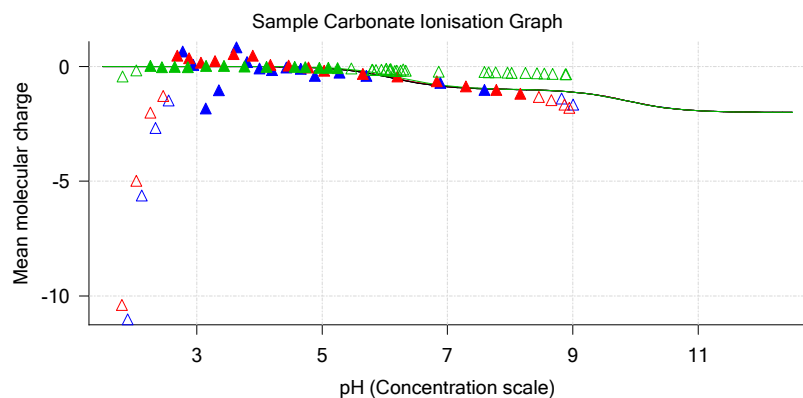

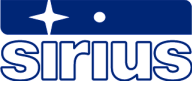

Sample name: **M12\_octanol**  
Assay name: **pH-metric high logP**  
Assay ID: **18C-01012**  
Filename: **C:\Sirius\_T3\Mehtap\20180228\_exp28\_logP\_T3-2\18C-01012\_M12\_octanol\_pH-metric high logP.t3r**

Experiment start time: **3/1/2018 3:28:52 PM**  
Analyst: **Pion**  
Instrument ID: **T312060**

## Graphs (continued)

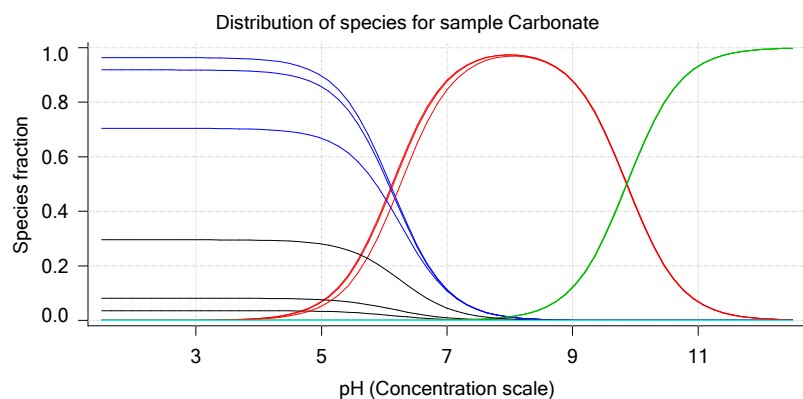

Sample name: **M12\_octanol** Experiment start time: **3/1/2018 3:28:52 PM**  
 Assay name: **pH-metric high logP** Analyst: **Pion**  
 Assay ID: **18C-01012** Instrument ID: **T312060**  
 Filename: **C:\Sirius\_T3\Mehtap\20180228\_exp28\_logP\_T3-2\18C-01012\_M12\_octanol\_pH-metric high logP.t3r**

## pH-metric high logP Titration 1 of 3 18C-01012 Points 1 to 21

### Overall results

RMSD 0.175  
 Average ionic strength 0.159 M  
 Average temperature 25.0°C  
 Partition ratio 0.0122 : 1  
 Analyte concentration range 3733.6 µM to 3842.7 µM  
 Total points considered 15 of 21

### Warnings and errors

Errors None  
 Warnings None

### Four-Plus parameters

 Alpha 0.130 3/1/2018 3:28:52 PM C:\Sirius\_T3\HCl18B27.t3r  
 S 0.9970 3/1/2018 3:28:52 PM C:\Sirius\_T3\HCl18B27.t3r  
 jH 0.8 3/1/2018 3:28:52 PM C:\Sirius\_T3\HCl18B27.t3r  
 jOH -0.4 3/1/2018 3:28:52 PM C:\Sirius\_T3\HCl18B27.t3r

### Titrants

 0.50 M HCl 0.993513 3/1/2018 3:28:52 PM C:\Sirius\_T3\HCl18B27.t3r  
 0.50 M KOH 0.999845 3/1/2018 3:28:52 PM C:\Sirius\_T3\KOH18B27.t3r

### Sample

 M12\_octanol concentration factor 0.790  
 M12\_octanol stoichiometry 1.000  
 Chloride stoichiometry 1.000  
 Base pKa 1 5.28  
 logP (XH +) 1.53  
 logP (neutral X) 3.90

### Sample graphs

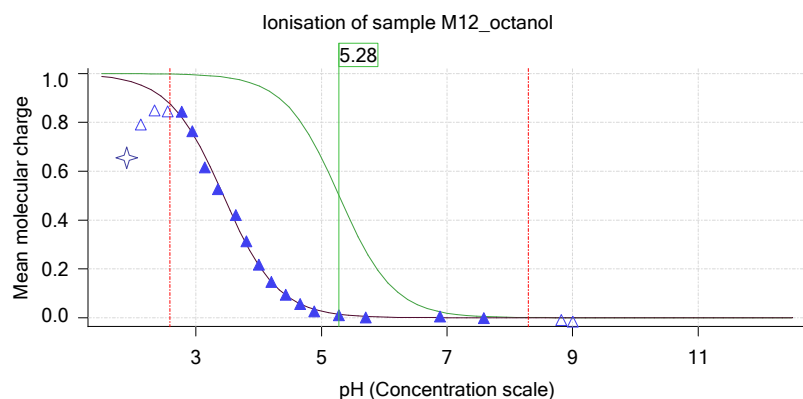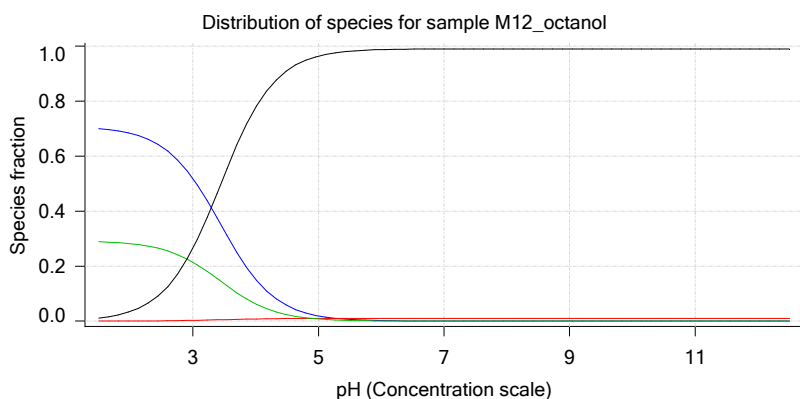

Sample name: **M12\_octanol**  
Assay name: **pH-metric high logP**  
Assay ID: **18C-01012**  
Filename: **C:\Sirius\_T3\Mehtap\20180228\_exp28\_logP\_T3-2\18C-01012\_M12\_octanol\_pH-metric high logP.t3r**

Experiment start time: **3/1/2018 3:28:52 PM**  
Analyst: **Pion**  
Instrument ID: **T312060**

## Sample graphs (continued)

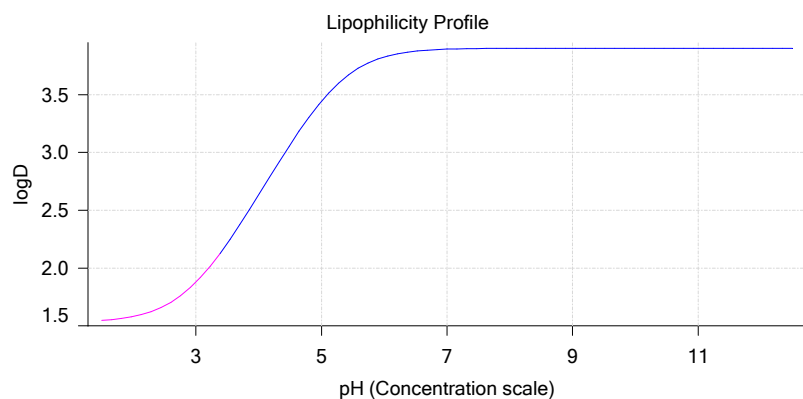

## Sample logD and percent species

| pH     | M12_octanol<br>logD | M12_octanol<br>M12_octanolH | M12_octanol<br>M12_octanol | M12_octanol<br>M12_octanolH* | M12_octanol<br>M12_octanol* | Comment    |
|--------|---------------------|-----------------------------|----------------------------|------------------------------|-----------------------------|------------|
| 1.000  | 1.54                | 70.54 %                     | 0.00 %                     | 29.09 %                      | 0.36 %                      | Stomach pH |
| 1.200  | 1.54                | 70.39 %                     | 0.01 %                     | 29.03 %                      | 0.57 %                      |            |
| 2.000  | 1.58                | 68.31 %                     | 0.04 %                     | 28.17 %                      | 3.48 %                      |            |
| 3.000  | 1.88                | 51.88 %                     | 0.27 %                     | 21.40 %                      | 26.45 %                     |            |
| 4.000  | 2.63                | 15.23 %                     | 0.80 %                     | 6.28 %                       | 77.68 %                     |            |
| 5.000  | 3.44                | 1.89 %                      | 0.99 %                     | 0.78 %                       | 96.34 %                     |            |
| 6.000  | 3.83                | 0.19 %                      | 1.02 %                     | 0.08 %                       | 98.71 %                     | Blood pH   |
| 6.500  | 3.88                | 0.06 %                      | 1.02 %                     | 0.03 %                       | 98.90 %                     |            |
| 7.000  | 3.89                | 0.02 %                      | 1.02 %                     | 0.01 %                       | 98.95 %                     |            |
| 7.400  | 3.90                | 0.01 %                      | 1.02 %                     | 0.00 %                       | 98.97 %                     |            |
| 8.000  | 3.90                | 0.00 %                      | 1.02 %                     | 0.00 %                       | 98.98 %                     |            |
| 9.000  | 3.90                | 0.00 %                      | 1.02 %                     | 0.00 %                       | 98.98 %                     |            |
| 10.000 | 3.90                | 0.00 %                      | 1.02 %                     | 0.00 %                       | 98.98 %                     |            |
| 11.000 | 3.90                | 0.00 %                      | 1.02 %                     | 0.00 %                       | 98.98 %                     |            |
| 12.000 | 3.90                | 0.00 %                      | 1.02 %                     | 0.00 %                       | 98.98 %                     |            |

## Carbonate and acidity

Carbonate 0.088 mM  
Acidity error -0.758 mM

## Other graphs

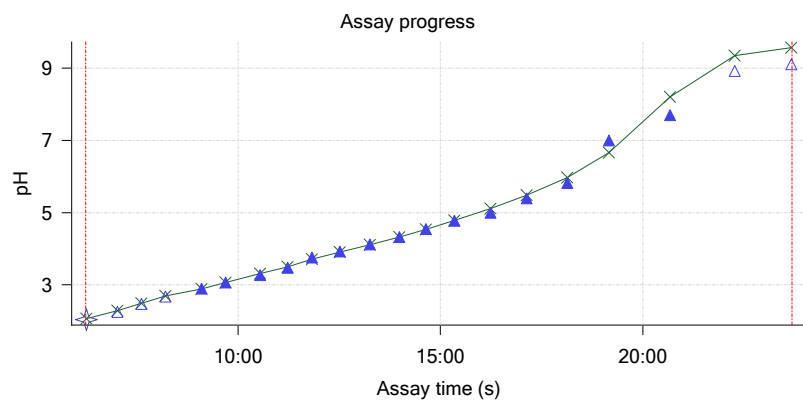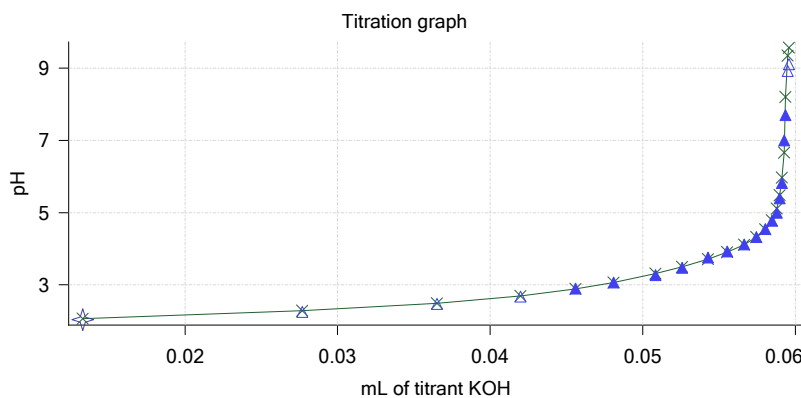

Sample name: **M12\_octanol**  
 Assay name: **pH-metric high logP**  
 Assay ID: **18C-01012**  
 Filename: **C:\Sirius\_T3\Mehtap\20180228\_exp28\_logP\_T3-2\18C-01012\_M12\_octanol\_pH-metric high logP.t3r**

Experiment start time: **3/1/2018 3:28:52 PM**  
 Analyst: **Pion**  
 Instrument ID: **T312060**

## Other graphs (continued)

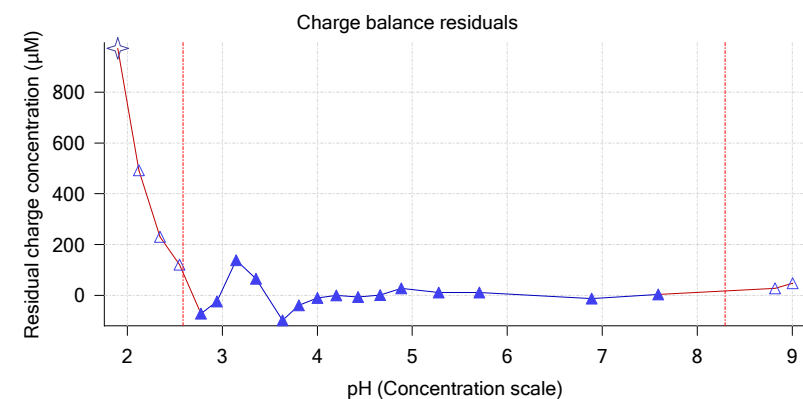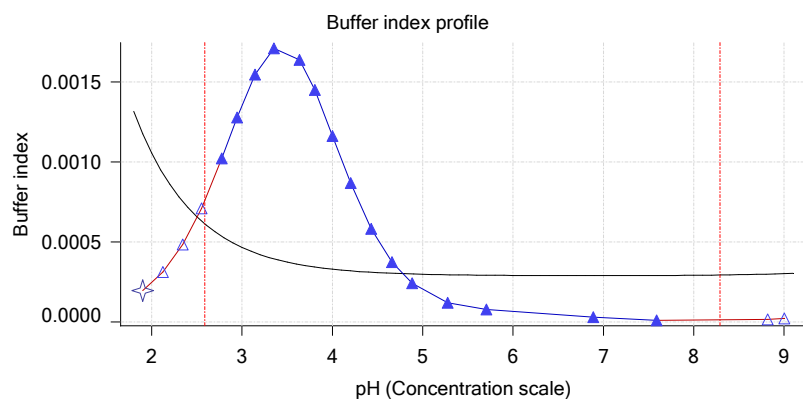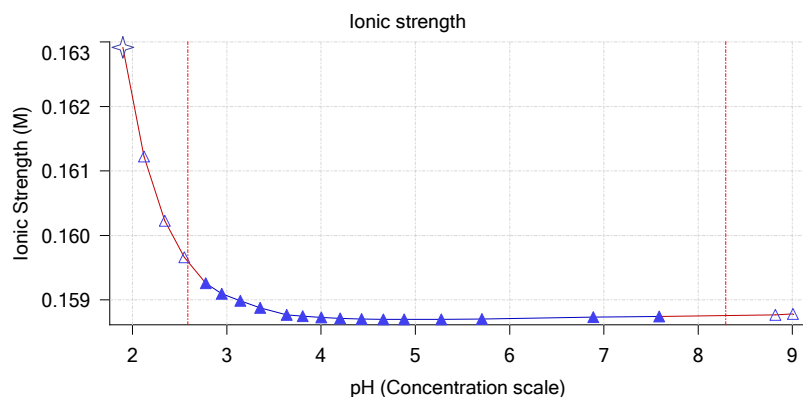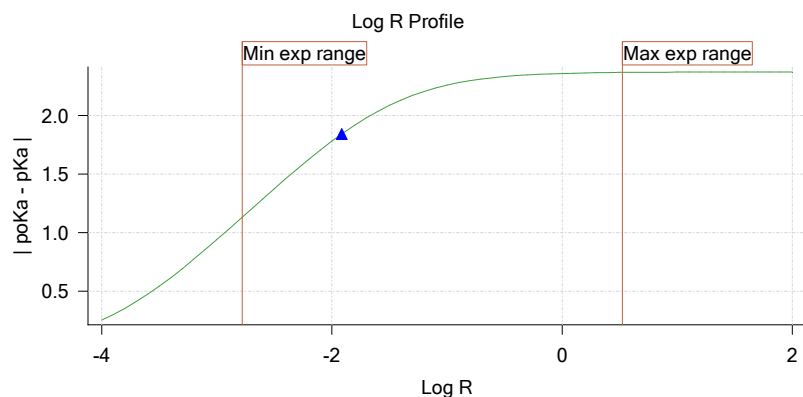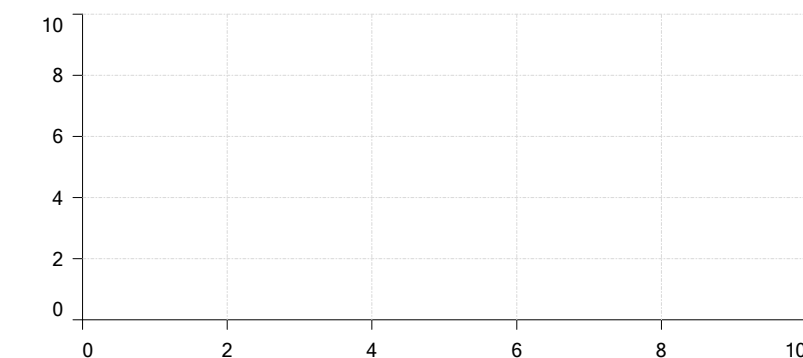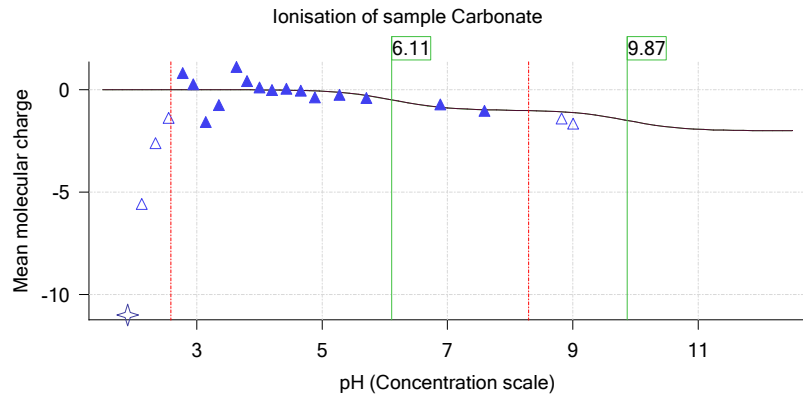

Sample name: **M12\_octanol**  
 Assay name: **pH-metric high logP**  
 Assay ID: **18C-01012**  
 Filename: **C:\Sirius\_T3\Mehtap\20180228\_exp28\_logP\_T3-2\18C-01012\_M12\_octanol\_pH-metric high logP.t3r**

Experiment start time: **3/1/2018 3:28:52 PM**  
 Analyst: **Pion**  
 Instrument ID: **T312060**

## pH-metric high logP Titration 2 of 3 18C-01012 Points 22 to 45

### Overall results

RMSD 0.444  
 Average ionic strength 0.164 M  
 Average temperature 25.0°C  
 Partition ratio 0.0288 : 1  
 Analyte concentration range 3433.0 µM to 3545.2 µM  
 Total points considered 16 of 24

### Warnings and errors

Errors None  
 Warnings Sample concentration factor out of range

### Four-Plus parameters

Alpha 0.130 3/1/2018 3:28:52 PM C:\Sirius\_T3\HCl18B27.t3r  
 S 0.9970 3/1/2018 3:28:52 PM C:\Sirius\_T3\HCl18B27.t3r  
 jH 0.8 3/1/2018 3:28:52 PM C:\Sirius\_T3\HCl18B27.t3r  
 jOH -0.4 3/1/2018 3:28:52 PM C:\Sirius\_T3\HCl18B27.t3r

### Titrants

0.50 M HCl 0.993513 3/1/2018 3:28:52 PM C:\Sirius\_T3\HCl18B27.t3r  
 0.50 M KOH 0.999845 3/1/2018 3:28:52 PM C:\Sirius\_T3\KOH18B27.t3r

### Sample

M12\_octanol concentration factor 0.666  
 M12\_octanol stoichiometry 1.000  
 Chloride stoichiometry 1.000  
 Base pKa 1 5.28  
 logP (XH +) 1.53  
 logP (neutral X) 3.93

### Sample graphs

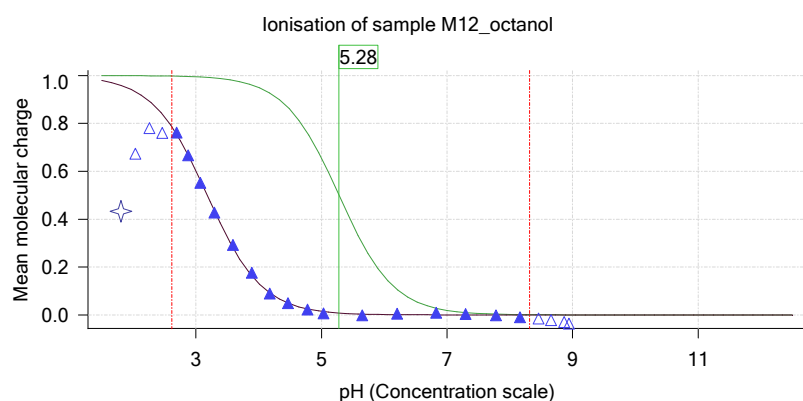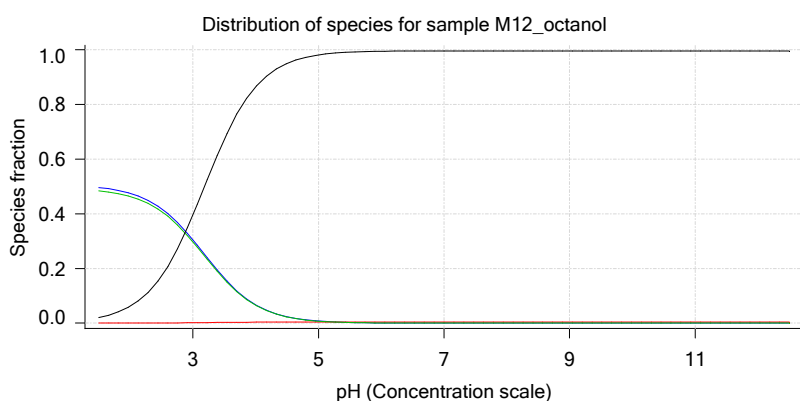

Sample name: **M12\_octanol**  
Assay name: **pH-metric high logP**  
Assay ID: **18C-01012**  
Filename: **C:\Sirius\_T3\Mehtap\20180228\_exp28\_logP\_T3-2\18C-01012\_M12\_octanol\_pH-metric high logP.t3r**

Experiment start time: **3/1/2018 3:28:52 PM**  
Analyst: **Pion**  
Instrument ID: **T312060**

## Sample graphs (continued)

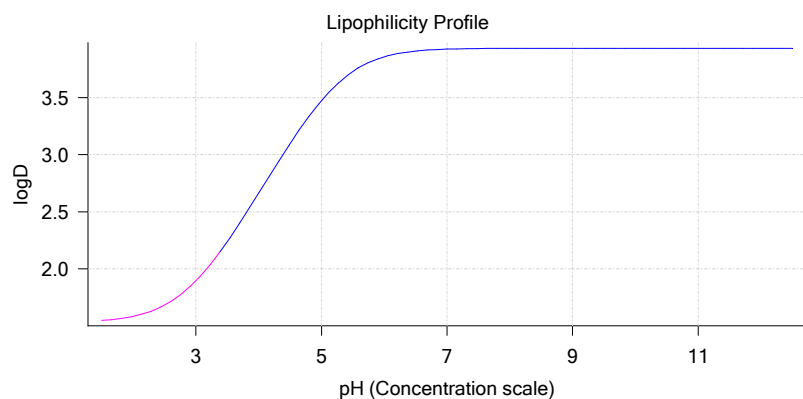

## Sample logD and percent species

| pH     | M12_octanol<br>logD | M12_octanol<br>M12_octanolH | M12_octanol<br>M12_octanol | M12_octanol<br>M12_octanolH* | M12_octanol<br>M12_octanol* | Comment    |
|--------|---------------------|-----------------------------|----------------------------|------------------------------|-----------------------------|------------|
| 1.000  | 1.54                | 50.30 %                     | 0.00 %                     | 49.05 %                      | 0.65 %                      | Stomach pH |
| 1.200  | 1.54                | 50.10 %                     | 0.00 %                     | 48.86 %                      | 1.03 %                      |            |
| 2.000  | 1.58                | 47.50 %                     | 0.02 %                     | 46.32 %                      | 6.15 %                      |            |
| 3.000  | 1.89                | 30.53 %                     | 0.16 %                     | 29.77 %                      | 39.54 %                     |            |
| 4.000  | 2.66                | 6.68 %                      | 0.35 %                     | 6.51 %                       | 86.46 %                     |            |
| 5.000  | 3.47                | 0.76 %                      | 0.40 %                     | 0.74 %                       | 98.11 %                     | Blood pH   |
| 6.000  | 3.86                | 0.08 %                      | 0.40 %                     | 0.07 %                       | 99.45 %                     |            |
| 6.500  | 3.91                | 0.02 %                      | 0.40 %                     | 0.02 %                       | 99.55 %                     |            |
| 7.000  | 3.92                | 0.01 %                      | 0.40 %                     | 0.01 %                       | 99.58 %                     |            |
| 7.400  | 3.93                | 0.00 %                      | 0.40 %                     | 0.00 %                       | 99.59 %                     |            |
| 8.000  | 3.93                | 0.00 %                      | 0.40 %                     | 0.00 %                       | 99.59 %                     |            |
| 9.000  | 3.93                | 0.00 %                      | 0.40 %                     | 0.00 %                       | 99.60 %                     |            |
| 10.000 | 3.93                | 0.00 %                      | 0.40 %                     | 0.00 %                       | 99.60 %                     |            |
| 11.000 | 3.93                | 0.00 %                      | 0.40 %                     | 0.00 %                       | 99.60 %                     |            |
| 12.000 | 3.93                | 0.00 %                      | 0.40 %                     | 0.00 %                       | 99.60 %                     |            |

## Carbonate and acidity

Carbonate 0.122 mM  
Acidity error -0.397 mM

## Other graphs

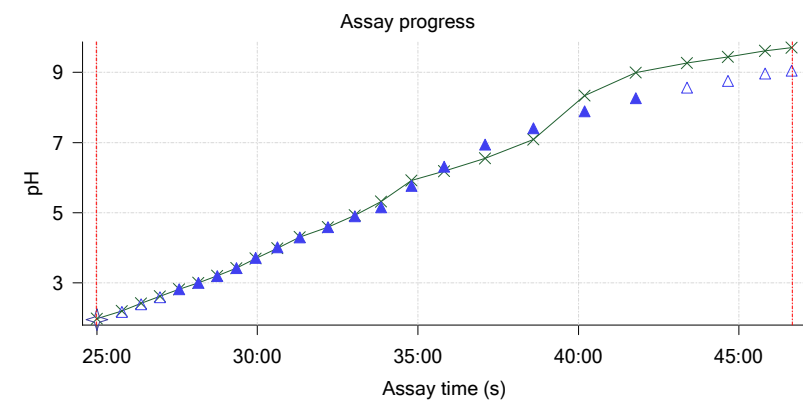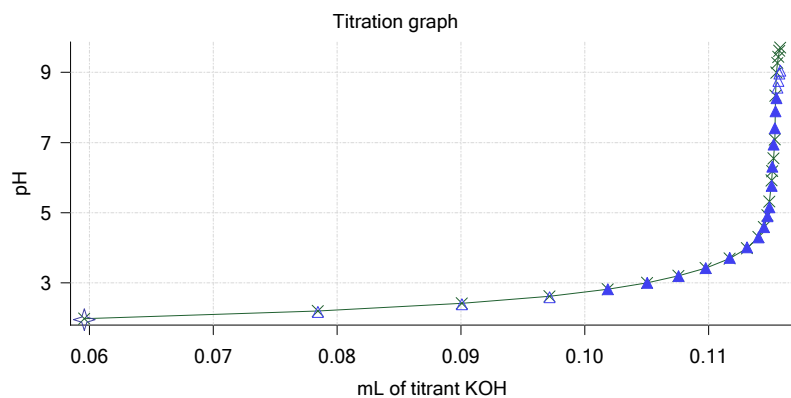



Sample name: **M12\_octanol**  
 Assay name: **pH-metric high logP**  
 Assay ID: **18C-01012**  
 Filename: **C:\Sirius\_T3\Mehtap\20180228\_exp28\_logP\_T3-2\18C-01012\_M12\_octanol\_pH-metric high logP.t3r**

Experiment start time: **3/1/2018 3:28:52 PM**  
 Analyst: **Pion**  
 Instrument ID: **T312060**

## Other graphs (continued)

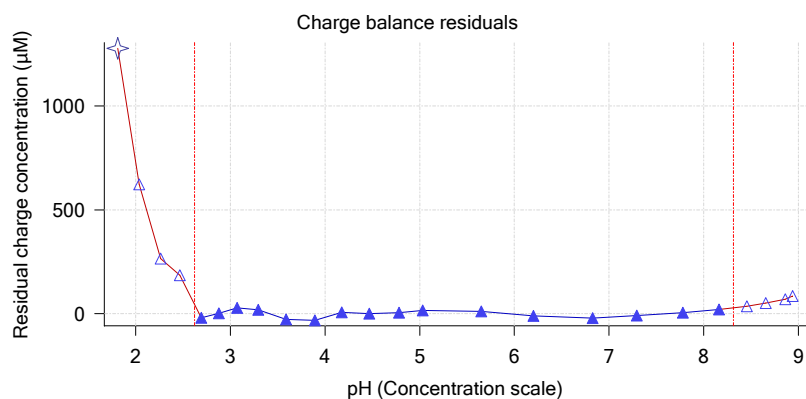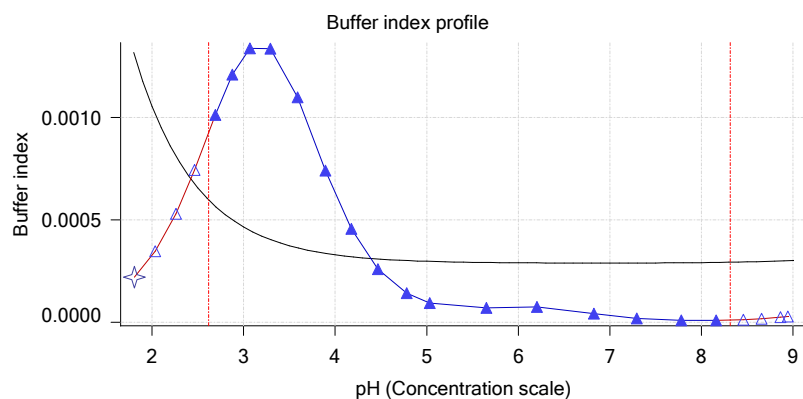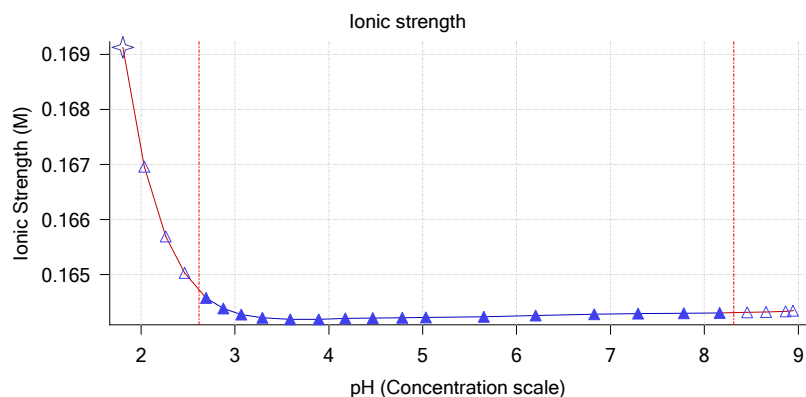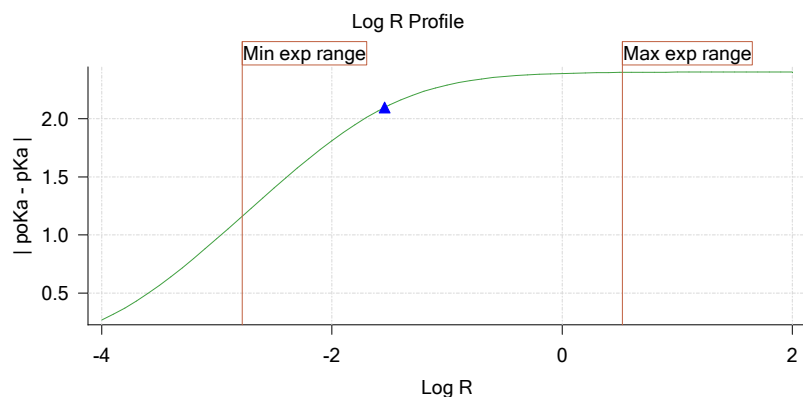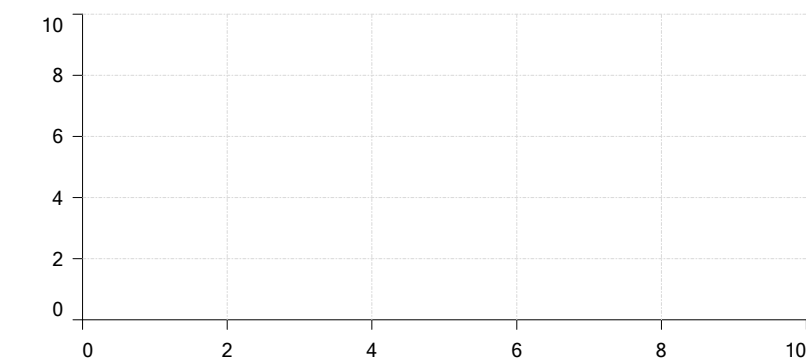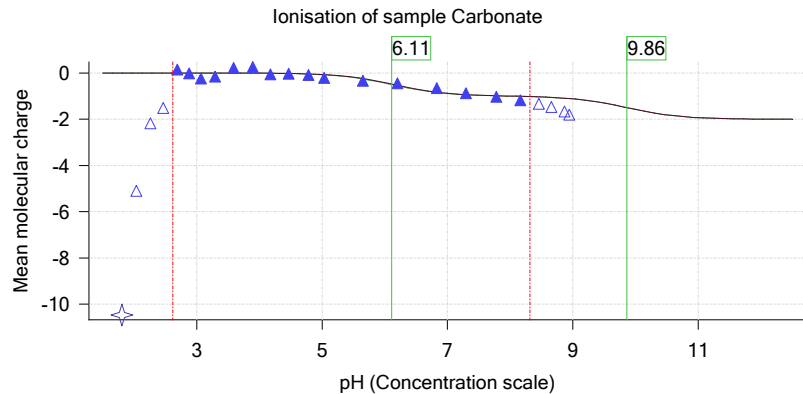

Sample name: **M12\_octanol**  
 Assay name: **pH-metric high logP**  
 Assay ID: **18C-01012**  
 Filename: **C:\Sirius\_T3\Mehtap\20180228\_exp28\_logP\_T3-2\18C-01012\_M12\_octanol\_pH-metric high logP.t3r**

Experiment start time: **3/1/2018 3:28:52 PM**  
 Analyst: **Pion**  
 Instrument ID: **T312060**

pH-metric high logP Titration 3 of 3 18C-01012 Points 46 to 87

## Overall results

RMSD 0.047  
 Average ionic strength 0.169 M  
 Average temperature 25.0°C  
 Partition ratio 0.1359 : 1  
 Analyte concentration range 2911.0 µM to 2994.8 µM  
 Total points considered 13 of 42

## Warnings and errors

Errors None  
 Warnings Sample concentration factor out of range  
 Excessive carbonate concentration present

## Four-Plus parameters

Alpha 0.130 3/1/2018 3:28:52 PM C:\Sirius\_T3\HCl18B27.t3r  
 S 0.9970 3/1/2018 3:28:52 PM C:\Sirius\_T3\HCl18B27.t3r  
 jH 0.8 3/1/2018 3:28:52 PM C:\Sirius\_T3\HCl18B27.t3r  
 jOH -0.4 3/1/2018 3:28:52 PM C:\Sirius\_T3\HCl18B27.t3r

## Titrants

0.50 M HCl 0.993513 3/1/2018 3:28:52 PM C:\Sirius\_T3\HCl18B27.t3r  
 0.50 M KOH 0.999845 3/1/2018 3:28:52 PM C:\Sirius\_T3\KOH18B27.t3r

## Sample

M12\_octanol concentration factor 0.461  
 M12\_octanol stoichiometry 1.000  
 Chloride stoichiometry 1.000  
 Base pKa 1 5.28  
 logP (XH +) 1.53  
 logP (neutral X) 4.17

## Sample graphs

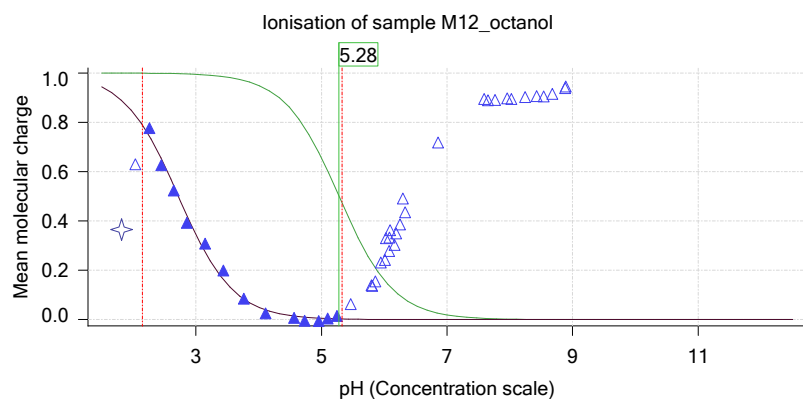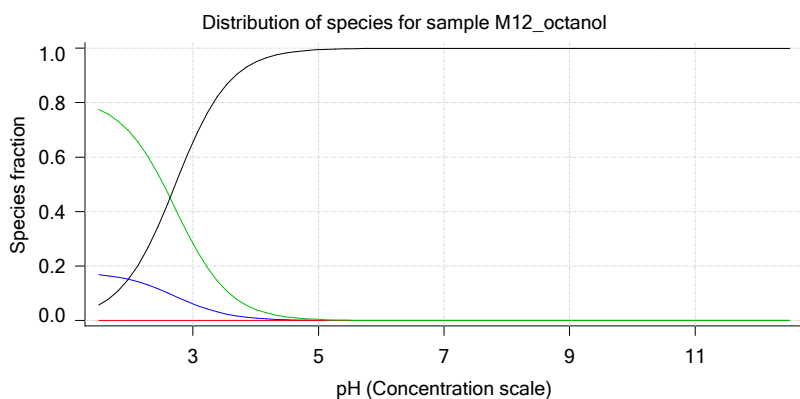

Sample name: **M12\_octanol**  
 Assay name: **pH-metric high logP**  
 Assay ID: **18C-01012**  
 Filename: **C:\Sirius\_T3\Mehtap\20180228\_exp28\_logP\_T3-2\18C-01012\_M12\_octanol\_pH-metric high logP.t3r**

Experiment start time: **3/1/2018 3:28:52 PM**  
 Analyst: **Pion**  
 Instrument ID: **T312060**

## Sample graphs (continued)

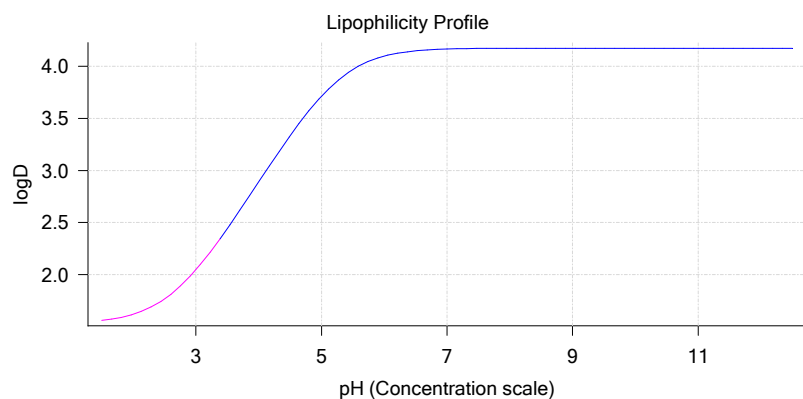

## Sample logD and percent species

| pH     | M12_octanol<br>logD | M12_octanol<br>M12_octanolH | M12_octanol<br>M12_octanolH | M12_octanol<br>M12_octanolH* | M12_octanol<br>M12_octanol* | Comment    |
|--------|---------------------|-----------------------------|-----------------------------|------------------------------|-----------------------------|------------|
| 1.000  | 1.54                | 17.51 %                     | 0.00 %                      | 80.63 %                      | 1.86 %                      | Stomach pH |
| 1.200  | 1.55                | 17.32 %                     | 0.00 %                      | 79.76 %                      | 2.92 %                      |            |
| 2.000  | 1.62                | 15.00 %                     | 0.01 %                      | 69.06 %                      | 15.93 %                     |            |
| 3.000  | 2.05                | 6.16 %                      | 0.03 %                      | 28.37 %                      | 65.44 %                     |            |
| 4.000  | 2.89                | 0.89 %                      | 0.05 %                      | 4.12 %                       | 94.94 %                     |            |
| 5.000  | 3.71                | 0.09 %                      | 0.05 %                      | 0.43 %                       | 99.43 %                     | Blood pH   |
| 6.000  | 4.10                | 0.01 %                      | 0.05 %                      | 0.04 %                       | 99.90 %                     |            |
| 6.500  | 4.15                | 0.00 %                      | 0.05 %                      | 0.01 %                       | 99.93 %                     |            |
| 7.000  | 4.16                | 0.00 %                      | 0.05 %                      | 0.00 %                       | 99.95 %                     |            |
| 7.400  | 4.17                | 0.00 %                      | 0.05 %                      | 0.00 %                       | 99.95 %                     |            |
| 8.000  | 4.17                | 0.00 %                      | 0.05 %                      | 0.00 %                       | 99.95 %                     |            |
| 9.000  | 4.17                | 0.00 %                      | 0.05 %                      | 0.00 %                       | 99.95 %                     |            |
| 10.000 | 4.17                | 0.00 %                      | 0.05 %                      | 0.00 %                       | 99.95 %                     |            |
| 11.000 | 4.17                | 0.00 %                      | 0.05 %                      | 0.00 %                       | 99.95 %                     |            |
| 12.000 | 4.17                | 0.00 %                      | 0.05 %                      | 0.00 %                       | 99.95 %                     |            |

## Carbonate and acidity

Carbonate 1.901 mM  
 Acidity error -0.347 mM

## Other graphs

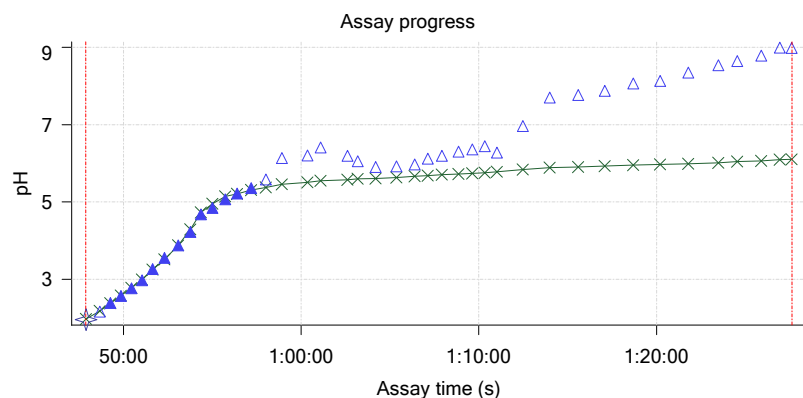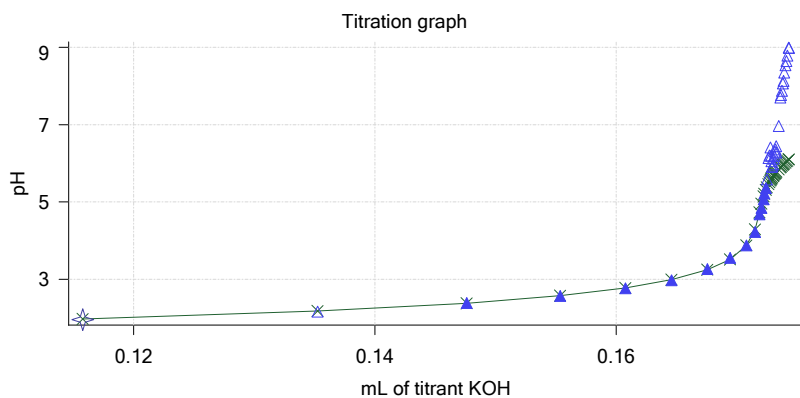

Sample name: **M12\_octanol**  
 Assay name: **pH-metric high logP**  
 Assay ID: **18C-01012**  
 Filename: **C:\Sirius\_T3\Mehtap\20180228\_exp28\_logP\_T3-2\18C-01012\_M12\_octanol\_pH-metric high logP.t3r**

Experiment start time: **3/1/2018 3:28:52 PM**  
 Analyst: **Pion**  
 Instrument ID: **T312060**

## Other graphs (continued)

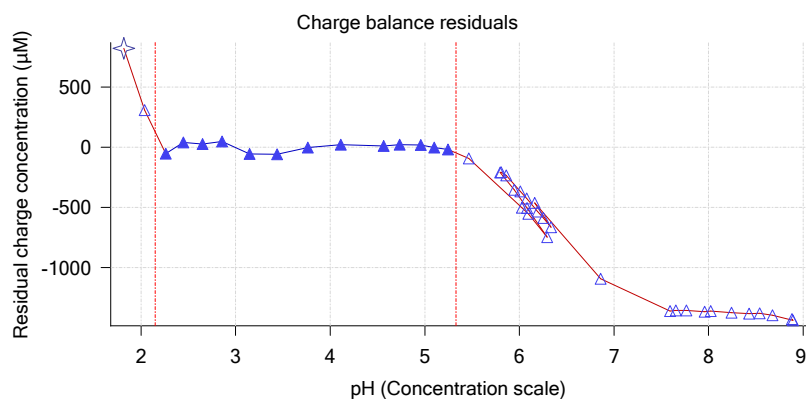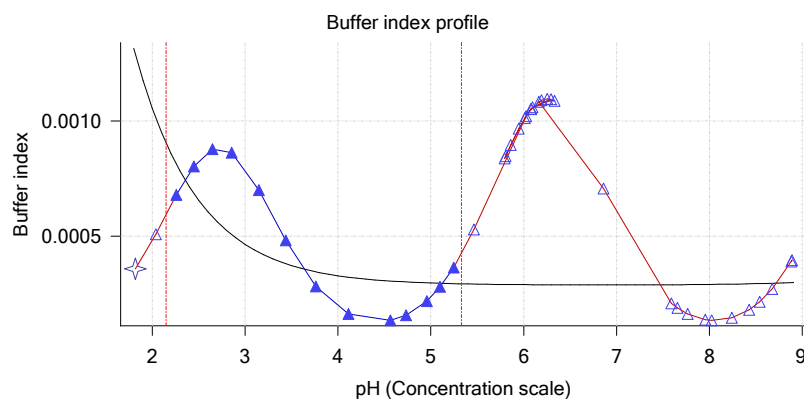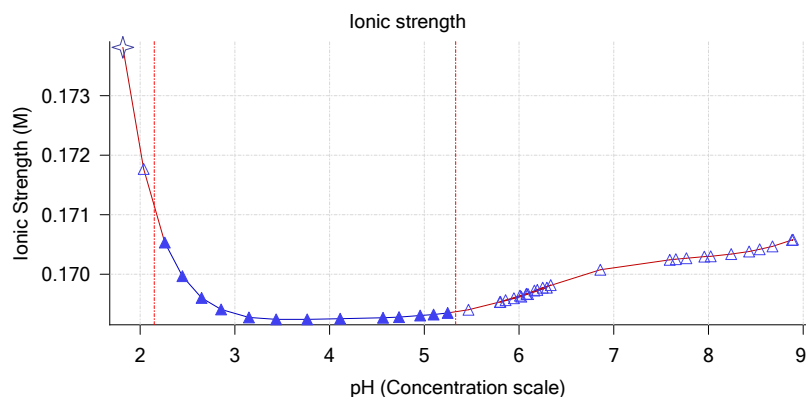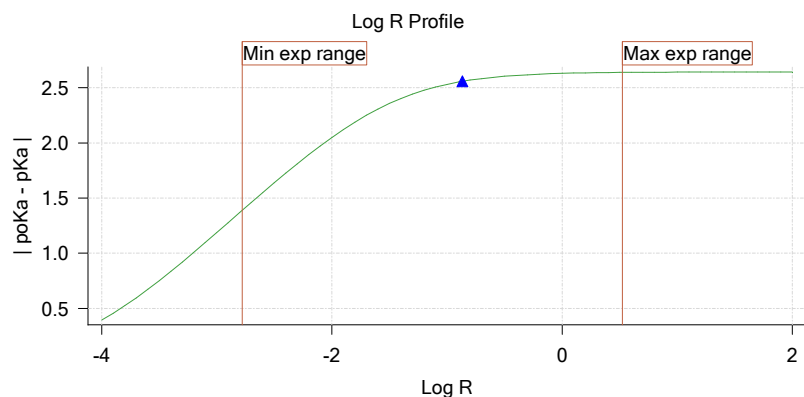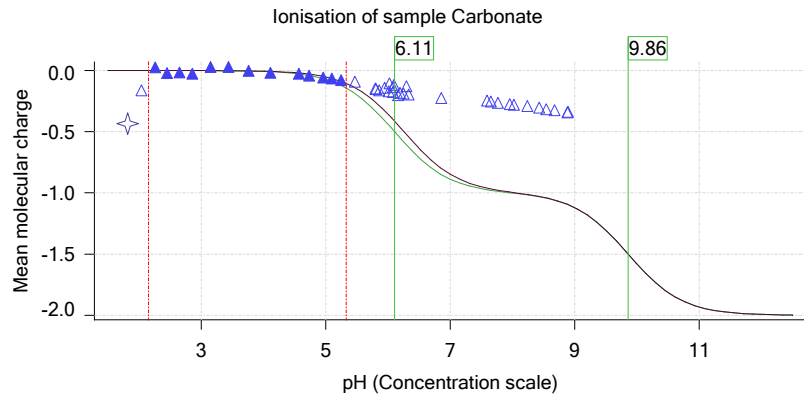

Sample name: **M12\_octanol**  
 Assay name: **pH-metric high logP**  
 Assay ID: **18C-01012**  
 Filename: **C:\Sirius\_T3\Mehtap\20180228\_exp28\_logP\_T3-2\18C-01012\_M12\_octanol\_pH-metric high logP.t3r**

Experiment start time: **3/1/2018 3:28:52 PM**  
 Analyst: **Pion**  
 Instrument ID: **T312060**

## Assay Model

| Settings                          | Value        | Date/Time changed    | Imported from           |
|-----------------------------------|--------------|----------------------|-------------------------|
| Sample name                       | M12_octanol  | 2/28/2018 2:58:36 PM | User entered value      |
| Sample by                         | Weight       |                      | Default value           |
| Sample weight                     | 0.001780 g   | 2/28/2018 4:51:40 PM | User entered value      |
| Formula weight                    | 292.16 g/mol | 2/28/2018 2:58:36 PM | User entered value      |
| Solubility                        | Unknown      |                      | Default value           |
| Molecular weight                  | 255.70       | 2/28/2018 2:58:36 PM | User entered value      |
| Individual pKa ionic environments | No           |                      | Default value           |
| Number of pKas                    | 1            | 2/28/2018 2:58:36 PM | User entered value      |
| Sample is a                       | Base         | 2/28/2018 2:58:36 PM | User entered value      |
| pKa 1                             | 5.28         | 2/28/2018 2:58:36 PM | User entered value      |
| logp (XH +)                       | 1.53         | 2/28/2018 2:59:16 PM | User entered value      |
| logP (neutral X)                  | 3.50         | 2/28/2018 2:59:06 PM | User entered value      |
| Stoichiometry                     | 1.00000      |                      | Default value           |
| Aprotic counterion name           | Chloride     |                      | From standards.xml file |
| Stoichiometry                     | 1.00         |                      | From standards.xml file |
| Charge per counterion             | -1           |                      | From standards.xml file |

## Events

| Time    | Event             | Water      | Acid       | Base       | Octanol    | pH    | dpH/dt   | pH R-squared | pH SD   | dpH/dt time         |
|---------|-------------------|------------|------------|------------|------------|-------|----------|--------------|---------|---------------------|
| 3:15.3  | Initial pH = 4.96 |            |            |            |            |       |          |              |         |                     |
| 6:15.1  | Data point 1      | 1.50000 mL | 0.05221 mL | 0.01329 mL | 0.01999 mL | 2.033 | -0.00115 | 0.13540      | 0.00015 | 10.0 s              |
| 7:01.4  | Data point 2      | 1.50000 mL | 0.05221 mL | 0.02768 mL | 0.01999 mL | 2.252 | 0.00111  | 0.19272      | 0.00012 | 10.0 s              |
| 7:37.0  | Data point 3      | 1.50000 mL | 0.05221 mL | 0.03652 mL | 0.01999 mL | 2.470 | -0.00312 | 0.03211      | 0.00086 | 10.0 s              |
| 8:12.5  | Data point 4      | 1.50000 mL | 0.05221 mL | 0.04198 mL | 0.01999 mL | 2.675 | -0.00299 | 0.02511      | 0.00093 | 28.0 s              |
| 9:06.1  | Data point 5      | 1.50000 mL | 0.05221 mL | 0.04560 mL | 0.01999 mL | 2.899 | 0.00724  | 0.28037      | 0.00067 | 10.0 s              |
| 9:41.6  | Data point 6      | 1.50000 mL | 0.05221 mL | 0.04809 mL | 0.01999 mL | 3.067 | -0.00758 | 0.65584      | 0.00046 | 10.0 s              |
| 10:32.6 | Data point 7      | 1.50000 mL | 0.05221 mL | 0.05085 mL | 0.01999 mL | 3.266 | -0.00574 | 0.79317      | 0.00032 | 10.5 s              |
| 11:13.7 | Data point 8      | 1.50000 mL | 0.05221 mL | 0.05259 mL | 0.01999 mL | 3.474 | -0.01919 | 0.98927      | 0.00095 | 10.5 s              |
| 11:49.7 | Data point 9      | 1.50000 mL | 0.05221 mL | 0.05428 mL | 0.01999 mL | 3.755 | -0.01633 | 0.83230      | 0.00088 | 10.5 s              |
| 12:30.9 | Data point 10     | 1.50000 mL | 0.05221 mL | 0.05555 mL | 0.01999 mL | 3.923 | -0.01859 | 0.95788      | 0.00094 | 14.0 s              |
| 13:15.5 | Data point 11     | 1.50000 mL | 0.05221 mL | 0.05666 mL | 0.01999 mL | 4.120 | -0.01675 | 0.71331      | 0.00098 | 13.0 s              |
| 13:59.1 | Data point 12     | 1.50000 mL | 0.05221 mL | 0.05746 mL | 0.01999 mL | 4.319 | -0.01672 | 0.90369      | 0.00087 | 14.0 s              |
| 14:38.5 | Data point 13     | 1.50000 mL | 0.05221 mL | 0.05804 mL | 0.01999 mL | 4.547 | -0.01987 | 0.96798      | 0.00100 | 17.0 s              |
| 15:21.0 | Data point 14     | 1.50000 mL | 0.05221 mL | 0.05847 mL | 0.01999 mL | 4.777 | -0.01763 | 0.88444      | 0.00093 | 23.0 s              |
| 16:14.5 | Data point 15     | 1.50000 mL | 0.05221 mL | 0.05880 mL | 0.01999 mL | 4.998 | -0.01818 | 0.93024      | 0.00093 | 28.0 s              |
| 17:08.0 | Data point 16     | 1.50000 mL | 0.05221 mL | 0.05898 mL | 0.01999 mL | 5.391 | -0.01937 | 0.94705      | 0.00098 | 29.5 s              |
| 18:08.0 | Data point 17     | 1.50000 mL | 0.05221 mL | 0.05913 mL | 0.01999 mL | 5.819 | -0.01888 | 0.96763      | 0.00095 | 31.5 s              |
| 19:10.1 | Data point 18     | 1.50000 mL | 0.05221 mL | 0.05927 mL | 0.01999 mL | 6.996 | -0.07112 | 0.99199      | 0.00353 | Timed out at 59.5 s |
| 20:40.6 | Data point 19     | 1.50000 mL | 0.05221 mL | 0.05936 mL | 0.01999 mL | 7.695 | -0.08201 | 0.99679      | 0.00406 | Timed out at 59.5 s |
| 22:16.3 | Data point 20     | 1.50000 mL | 0.05221 mL | 0.05950 mL | 0.01999 mL | 8.922 | -0.00844 | 0.17826      | 0.00099 | 53.5 s              |
| 23:40.4 | Data point 21     | 1.50000 mL | 0.05221 mL | 0.05960 mL | 0.01999 mL | 9.107 | -0.02002 | 0.98651      | 0.00100 | 26.0 s              |
| 25:00.1 | Data point 22     | 1.50000 mL | 0.10891 mL | 0.05960 mL | 0.05000 mL | 1.945 | -0.00363 | 0.51184      | 0.00025 | 10.5 s              |
| 25:46.8 | Data point 23     | 1.50000 mL | 0.10891 mL | 0.07846 mL | 0.05000 mL | 2.167 | 0.00370  | 0.60390      | 0.00024 | 10.0 s              |
| 26:22.5 | Data point 24     | 1.50000 mL | 0.10891 mL | 0.09008 mL | 0.05000 mL | 2.390 | -0.00263 | 0.03650      | 0.00068 | 10.0 s              |
| 26:58.0 | Data point 25     | 1.50000 mL | 0.10891 mL | 0.09715 mL | 0.05000 mL | 2.592 | 0.00780  | 0.23852      | 0.00079 | 10.5 s              |
| 27:34.1 | Data point 26     | 1.50000 mL | 0.10891 mL | 0.10186 mL | 0.05000 mL | 2.817 | 0.00513  | 0.20428      | 0.00056 | 10.0 s              |
| 28:09.6 | Data point 27     | 1.50000 mL | 0.10891 mL | 0.10503 mL | 0.05000 mL | 3.001 | -0.00273 | 0.39758      | 0.00021 | 10.0 s              |
| 28:45.1 | Data point 28     | 1.50000 mL | 0.10891 mL | 0.10757 mL | 0.05000 mL | 3.191 | -0.00242 | 0.40166      | 0.00019 | 10.5 s              |
| 29:21.2 | Data point 29     | 1.50000 mL | 0.10891 mL | 0.10976 mL | 0.05000 mL | 3.415 | -0.00337 | 0.31261      | 0.00030 | 10.0 s              |
| 29:56.7 | Data point 30     | 1.50000 mL | 0.10891 mL | 0.11171 mL | 0.05000 mL | 3.709 | -0.00838 | 0.53036      | 0.00057 | 10.0 s              |
| 30:37.3 | Data point 31     | 1.50000 mL | 0.10891 mL | 0.11310 mL | 0.05000 mL | 4.012 | -0.01267 | 0.50941      | 0.00088 | 11.5 s              |
| 31:19.4 | Data point 32     | 1.50000 mL | 0.10891 mL | 0.11402 mL | 0.05000 mL | 4.293 | -0.01573 | 0.65616      | 0.00096 | 27.0 s              |
| 32:11.9 | Data point 33     | 1.50000 mL | 0.10891 mL | 0.11446 mL | 0.05000 mL | 4.584 | -0.01886 | 0.90646      | 0.00098 | 25.0 s              |
| 33:02.3 | Data point 34     | 1.50000 mL | 0.10891 mL | 0.11475 mL | 0.05000 mL | 4.896 | -0.01935 | 0.95587      | 0.00098 | 18.5 s              |

Sample name: **M12\_octanol**  
 Assay name: **pH-metric high logP**  
 Assay ID: **18C-01012**  
 Filename: **C:\Sirius\_T3\Mehtap\20180228\_exp28\_logP\_T3-2\18C-01012\_M12\_octanol\_pH-metric high logP.t3r**

Experiment start time: **3/1/2018 3:28:52 PM**  
 Analyst: **Pion**  
 Instrument ID: **T312060**

## Events (continued)

| Time      | Event         | Water      | Acid       | Base       | Octanol    | pH    | dpH/dt   | pH R-squared | pH SD   | dpH/dt time         |
|-----------|---------------|------------|------------|------------|------------|-------|----------|--------------|---------|---------------------|
| 33:51.3   | Data point 35 | 1.50000 mL | 0.10891 mL | 0.11491 mL | 0.05000 mL | 5.148 | -0.01470 | 0.60540      | 0.00093 | 26.5 s              |
| 34:48.4   | Data point 36 | 1.50000 mL | 0.10891 mL | 0.11508 mL | 0.05000 mL | 5.764 | -0.01973 | 0.94931      | 0.00100 | 30.0 s              |
| 35:49.0   | Data point 37 | 1.50000 mL | 0.10891 mL | 0.11515 mL | 0.05000 mL | 6.314 | -0.01346 | 0.55470      | 0.00089 | 46.0 s              |
| 37:05.6   | Data point 38 | 1.50000 mL | 0.10891 mL | 0.11524 mL | 0.05000 mL | 6.936 | -0.04576 | 0.98945      | 0.00227 | Timed out at 59.5 s |
| 38:36.1   | Data point 39 | 1.50000 mL | 0.10891 mL | 0.11533 mL | 0.05000 mL | 7.403 | -0.05091 | 0.98174      | 0.00254 | Timed out at 59.5 s |
| 40:11.7   | Data point 40 | 1.50000 mL | 0.10891 mL | 0.11540 mL | 0.05000 mL | 7.887 | -0.07516 | 0.99257      | 0.00373 | Timed out at 59.5 s |
| 41:47.3   | Data point 41 | 1.50000 mL | 0.10891 mL | 0.11547 mL | 0.05000 mL | 8.267 | -0.03226 | 0.96652      | 0.00162 | Timed out at 59.5 s |
| 43:22.8   | Data point 42 | 1.50000 mL | 0.10891 mL | 0.11555 mL | 0.05000 mL | 8.561 | -0.01882 | 0.90027      | 0.00098 | 41.0 s              |
| 44:39.5   | Data point 43 | 1.50000 mL | 0.10891 mL | 0.11562 mL | 0.05000 mL | 8.761 | -0.02011 | 0.98771      | 0.00100 | 33.5 s              |
| 45:48.7   | Data point 44 | 1.50000 mL | 0.10891 mL | 0.11571 mL | 0.05000 mL | 8.967 | -0.01575 | 0.73120      | 0.00091 | 19.5 s              |
| 46:38.8   | Data point 45 | 1.50000 mL | 0.10891 mL | 0.11578 mL | 0.05000 mL | 9.045 | -0.01982 | 0.97953      | 0.00099 | 17.0 s              |
| 47:53.5   | Data point 46 | 1.50000 mL | 0.16860 mL | 0.11578 mL | 0.25000 mL | 1.956 | -0.00773 | 0.91840      | 0.00040 | 10.5 s              |
| 48:40.3   | Data point 47 | 1.50000 mL | 0.16860 mL | 0.13525 mL | 0.25000 mL | 2.168 | 0.00144  | 0.01980      | 0.00051 | 10.0 s              |
| 49:16.0   | Data point 48 | 1.50000 mL | 0.16860 mL | 0.14760 mL | 0.25000 mL | 2.388 | 0.01561  | 0.79013      | 0.00087 | 10.0 s              |
| 49:51.7   | Data point 49 | 1.50000 mL | 0.16860 mL | 0.15534 mL | 0.25000 mL | 2.573 | -0.01149 | 0.57763      | 0.00075 | 10.0 s              |
| 50:27.2   | Data point 50 | 1.50000 mL | 0.16860 mL | 0.16075 mL | 0.25000 mL | 2.774 | 0.00396  | 0.06451      | 0.00077 | 10.0 s              |
| 51:02.7   | Data point 51 | 1.50000 mL | 0.16860 mL | 0.16458 mL | 0.25000 mL | 2.979 | -0.00515 | 0.16315      | 0.00063 | 10.0 s              |
| 51:38.2   | Data point 52 | 1.50000 mL | 0.16860 mL | 0.16755 mL | 0.25000 mL | 3.270 | 0.00396  | 0.26107      | 0.00038 | 10.0 s              |
| 52:18.8   | Data point 53 | 1.50000 mL | 0.16860 mL | 0.16943 mL | 0.25000 mL | 3.558 | 0.01629  | 0.64793      | 0.00100 | 15.5 s              |
| 53:05.0   | Data point 54 | 1.50000 mL | 0.16860 mL | 0.17079 mL | 0.25000 mL | 3.882 | 0.01336  | 0.49641      | 0.00094 | 10.5 s              |
| 53:46.1   | Data point 55 | 1.50000 mL | 0.16860 mL | 0.17150 mL | 0.25000 mL | 4.230 | -0.01083 | 0.45645      | 0.00079 | 10.5 s              |
| 54:22.0   | Data point 56 | 1.50000 mL | 0.16860 mL | 0.17187 mL | 0.25000 mL | 4.682 | -0.00156 | 0.00649      | 0.00095 | 13.0 s              |
| 55:00.4   | Data point 57 | 1.50000 mL | 0.16860 mL | 0.17204 mL | 0.25000 mL | 4.849 | -0.00797 | 0.20959      | 0.00086 | 13.0 s              |
| 55:43.9   | Data point 58 | 1.50000 mL | 0.16860 mL | 0.17220 mL | 0.25000 mL | 5.072 | -0.00963 | 0.30906      | 0.00086 | 14.5 s              |
| 56:23.8   | Data point 59 | 1.50000 mL | 0.16860 mL | 0.17227 mL | 0.25000 mL | 5.214 | 0.01328  | 0.44826      | 0.00098 | 17.5 s              |
| 57:11.9   | Data point 60 | 1.50000 mL | 0.16860 mL | 0.17239 mL | 0.25000 mL | 5.360 | -0.00926 | 0.25608      | 0.00090 | 13.5 s              |
| 58:01.0   | Data point 61 | 1.50000 mL | 0.16860 mL | 0.17248 mL | 0.25000 mL | 5.579 | 0.01451  | 0.60856      | 0.00092 | 24.0 s              |
| 58:55.6   | Data point 62 | 1.50000 mL | 0.16860 mL | 0.17260 mL | 0.25000 mL | 6.137 | -0.01945 | 0.97898      | 0.00097 | 55.5 s              |
| 1:00:21.7 | Data point 63 | 1.50000 mL | 0.16860 mL | 0.17269 mL | 0.25000 mL | 6.206 | 0.00784  | 0.16179      | 0.00096 | 13.5 s              |
| 1:01:05.7 | Data point 64 | 1.50000 mL | 0.16860 mL | 0.17277 mL | 0.25000 mL | 6.406 | -0.02142 | 0.96918      | 0.00107 | Timed out at 59.5 s |
| 1:02:36.2 | Data point 65 | 1.50000 mL | 0.16860 mL | 0.17281 mL | 0.25000 mL | 6.193 | 0.00801  | 0.28675      | 0.00074 | 10.0 s              |
| 1:03:11.6 | Data point 66 | 1.50000 mL | 0.16860 mL | 0.17286 mL | 0.25000 mL | 6.057 | 0.00973  | 0.24043      | 0.00098 | 35.0 s              |
| 1:04:12.0 | Data point 67 | 1.50000 mL | 0.16860 mL | 0.17288 mL | 0.25000 mL | 5.908 | 0.01936  | 0.92962      | 0.00099 | 39.0 s              |
| 1:05:21.4 | Data point 68 | 1.50000 mL | 0.16860 mL | 0.17293 mL | 0.25000 mL | 5.918 | 0.01461  | 0.56025      | 0.00096 | 37.0 s              |
| 1:06:23.9 | Data point 69 | 1.50000 mL | 0.16860 mL | 0.17300 mL | 0.25000 mL | 5.972 | -0.01320 | 0.59468      | 0.00085 | 13.0 s              |
| 1:07:07.4 | Data point 70 | 1.50000 mL | 0.16860 mL | 0.17305 mL | 0.25000 mL | 6.123 | -0.01667 | 0.70517      | 0.00098 | 17.5 s              |
| 1:07:55.5 | Data point 71 | 1.50000 mL | 0.16860 mL | 0.17310 mL | 0.25000 mL | 6.190 | 0.01867  | 0.87098      | 0.00099 | 30.5 s              |
| 1:08:51.4 | Data point 72 | 1.50000 mL | 0.16860 mL | 0.17314 mL | 0.25000 mL | 6.303 | -0.00843 | 0.60418      | 0.00054 | 16.0 s              |
| 1:09:38.0 | Data point 73 | 1.50000 mL | 0.16860 mL | 0.17319 mL | 0.25000 mL | 6.363 | -0.01074 | 0.33367      | 0.00092 | 17.0 s              |
| 1:10:20.4 | Data point 74 | 1.50000 mL | 0.16860 mL | 0.17324 mL | 0.25000 mL | 6.444 | -0.01718 | 0.73214      | 0.00099 | 15.0 s              |
| 1:11:00.8 | Data point 75 | 1.50000 mL | 0.16860 mL | 0.17328 mL | 0.25000 mL | 6.273 | 0.01956  | 0.96509      | 0.00098 | 57.5 s              |
| 1:12:28.9 | Data point 76 | 1.50000 mL | 0.16860 mL | 0.17345 mL | 0.25000 mL | 6.967 | -0.09221 | 0.98961      | 0.00458 | Timed out at 59.5 s |
| 1:13:59.4 | Data point 77 | 1.50000 mL | 0.16860 mL | 0.17359 mL | 0.25000 mL | 7.698 | -0.10796 | 0.99667      | 0.00535 | Timed out at 59.5 s |
| 1:15:35.0 | Data point 78 | 1.50000 mL | 0.16860 mL | 0.17366 mL | 0.25000 mL | 7.761 | -0.05693 | 0.98901      | 0.00283 | Timed out at 59.5 s |
| 1:17:05.5 | Data point 79 | 1.50000 mL | 0.16860 mL | 0.17373 mL | 0.25000 mL | 7.873 | -0.04996 | 0.97617      | 0.00250 | Timed out at 59.5 s |
| 1:18:41.2 | Data point 80 | 1.50000 mL | 0.16860 mL | 0.17380 mL | 0.25000 mL | 8.062 | -0.05264 | 0.96602      | 0.00265 | Timed out at 59.5 s |

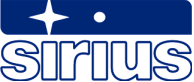

## Assay Events

Sample name: **M12\_octanol** Experiment start time: **3/1/2018 3:28:52 PM**  
Assay name: **pH-metric high logP** Analyst: **Pion**  
Assay ID: **18C-01012** Instrument ID: **T312060**  
Filename: **C:\Sirius\_T3\Mehtap\20180228\_exp28\_logP\_T3-2\18C-01012\_M12\_octanol\_pH-metric high logP.t3r**

**Events (continued)**

| Time      | Event         | Water      | Acid       | Base       | Octanol    | pH    | dpH/dt   | pH R-squared | pH SD   | dpH/dt time         |
|-----------|---------------|------------|------------|------------|------------|-------|----------|--------------|---------|---------------------|
| 1:20:11.7 | Data point 81 | 1.50000 mL | 0.16860 mL | 0.17385 mL | 0.25000 mL | 8.128 | -0.04768 | 0.99488      | 0.00236 | Timed out at 59.5 s |
| 1:21:47.4 | Data point 82 | 1.50000 mL | 0.16860 mL | 0.17392 mL | 0.25000 mL | 8.346 | -0.02426 | 0.96191      | 0.00122 | Timed out at 59.5 s |
| 1:23:28.3 | Data point 83 | 1.50000 mL | 0.16860 mL | 0.17401 mL | 0.25000 mL | 8.532 | -0.01603 | 0.65257      | 0.00098 | 28.0 s              |
| 1:24:32.0 | Data point 84 | 1.50000 mL | 0.16860 mL | 0.17411 mL | 0.25000 mL | 8.645 | -0.01972 | 0.96650      | 0.00099 | 46.0 s              |
| 1:25:53.8 | Data point 85 | 1.50000 mL | 0.16860 mL | 0.17418 mL | 0.25000 mL | 8.779 | -0.01801 | 0.80706      | 0.00099 | 22.0 s              |
| 1:26:56.6 | Data point 86 | 1.50000 mL | 0.16860 mL | 0.17429 mL | 0.25000 mL | 8.994 | -0.01105 | 0.30301      | 0.00099 | 14.5 s              |
| 1:27:36.5 | Data point 87 | 1.50000 mL | 0.16860 mL | 0.17432 mL | 0.25000 mL | 8.985 | -0.01268 | 0.48445      | 0.00090 | 22.5 s              |
| 1:28:08.1 | Assay volumes | 1.50000 mL | 0.16860 mL | 0.17432 mL | 0.25000 mL |       |          |              |         |                     |



Sample name: **M12\_octanol**  
Assay name: **pH-metric high logP**  
Assay ID: **18C-01012**  
Filename: **C:\Sirius\_T3\Mehtap\20180228\_exp28\_logP\_T3-2\18C-01012\_M12\_octanol\_pH-metric high logP.t3r**

Experiment start time: **3/1/2018 3:28:52 PM**  
Analyst: **Pion**  
Instrument ID: **T312060**

## Assay Settings

| Setting                             | Value              | Original Value | Date/Time changed | Imported from |
|-------------------------------------|--------------------|----------------|-------------------|---------------|
| <b>General Settings</b>             |                    |                |                   |               |
| Analyst name                        | Pion               |                |                   |               |
| <b>Standard Experiment Settings</b> |                    |                |                   |               |
| Number of titrations                | 3                  |                |                   |               |
| Minimum pH                          | 2.000              |                |                   |               |
| Maximum pH                          | 9.000              |                |                   |               |
| pH step between points of           | 0.200              |                |                   |               |
| Minimum titrant addition            | 0.00002 mL         |                |                   |               |
| Maximum titrant addition            | 0.10000 mL         |                |                   |               |
| Argon flow rate                     | 100%               |                |                   |               |
| Start titration using               | Cautious pH adjust |                |                   |               |
| <b>Advanced General Settings</b>    |                    |                |                   |               |
| Detect turbidity using              | None               |                |                   |               |
| Collect turbidity sensor data       | No                 |                |                   |               |
| Collect UV spectra                  | No                 |                |                   |               |
| Stir after titrant addition for     | 5 seconds          |                |                   |               |
| For titrant addition, stir at       | 10%                |                |                   |               |
| <b>Titration Pre-Dose</b>           |                    |                |                   |               |
| Titration pre-dose                  | None               |                |                   |               |
| <b>Assay Medium</b>                 |                    |                |                   |               |
| ISA water volume                    | 1.50 mL            |                |                   |               |
| Water added                         | Automatic          |                |                   |               |
| After water addition, stir for      | 5 seconds          |                |                   |               |
| At a speed of                       | 10%                |                |                   |               |
| Partition solvent type              | Octanol            |                |                   |               |
| Partition volume                    | 0.020 mL           |                |                   |               |
| Partition solvent added             | Automatic          |                |                   |               |
| After partition addition, stir for  | 1 seconds          |                |                   |               |
| <b>Sample Sonication</b>            |                    |                |                   |               |
| Sonicate                            | No                 |                |                   |               |
| <b>Sample Dissolution</b>           |                    |                |                   |               |
| Perform a dissolution stage         | Yes                |                |                   |               |
| Adjust and hold pH for dissolution  | To start pH        |                |                   |               |
| Stir to dissolve for                | 120 seconds        |                |                   |               |
| For dissolution, stir at            | 10%                |                |                   |               |
| <b>Carbonate purge</b>              |                    |                |                   |               |
| Perform a carbonate purge           | No                 |                |                   |               |
| <b>Temperature Control</b>          |                    |                |                   |               |
| Wait for temperature                | Yes                |                |                   |               |
| Required start temperature          | 25.0°C             |                |                   |               |
| Acceptable deviation                | 0.5°C              |                |                   |               |
| Time to wait                        | 60 seconds         |                |                   |               |
| Stir speed of                       | 50%                |                |                   |               |
| <b>Titration 1</b>                  |                    |                |                   |               |
| Titrate from                        | Low to high pH     |                |                   |               |
| Adjust to start pH                  | Yes                |                |                   |               |
| After pH adjust stir for            | 30 seconds         |                |                   |               |
| Stir to allow partitioning for      | 15 seconds         |                |                   |               |
| Stirrer speed for partitioning      | 50%                |                |                   |               |
| <b>Titration 2</b>                  |                    |                |                   |               |
| Titrate from                        | Low to high pH     |                |                   |               |
| Add additional water                | 0.00 mL            |                |                   |               |
| Additional partition solvent volume | 0.030 mL           |                |                   |               |
| Additional partition solvent added  | Automatic          |                |                   |               |
| After pH adjust stir for            | 30 seconds         |                |                   |               |
| Stir to allow partitioning for      | 15 seconds         |                |                   |               |
| Stirrer speed for partitioning      | 55%                |                |                   |               |
| <b>Titration 3</b>                  |                    |                |                   |               |



Sample name: **M12\_octanol** Experiment start time: **3/1/2018 3:28:52 PM**  
 Assay name: **pH-metric high logP** Analyst: **Pion**  
 Assay ID: **18C-01012** Instrument ID: **T312060**  
 Filename: **C:\Sirius\_T3\Mehtap\20180228\_exp28\_logP\_T3-2\18C-01012\_M12\_octanol\_pH-metric high logP.t3r**

## Assay Settings (continued)

| Setting                             | Value          | Original Value | Date/Time changed | Imported from |
|-------------------------------------|----------------|----------------|-------------------|---------------|
| Titrate from                        | Low to high pH |                |                   |               |
| Add additional water                | 0.00 mL        |                |                   |               |
| Additional partition solvent volume | 0.200 mL       |                |                   |               |
| Additional partition solvent added  | Automatic      |                |                   |               |
| After pH adjust stir for            | 30 seconds     |                |                   |               |
| Stir to allow partitioning for      | 15 seconds     |                |                   |               |
| Stirrer speed for partitioning      | 60%            |                |                   |               |
| <b>Data Point Stability</b>         |                |                |                   |               |
| Stir during data point collection   | No             |                |                   |               |
| Delay before data point collection  | 0 seconds      |                |                   |               |
| Number of points to average         | 20 points      |                |                   |               |
| Time interval between points        | 0.50 seconds   |                |                   |               |
| Required maximum standard deviation | 0.00100 dpH/dt |                |                   |               |
| Stability timeout after             | 60 seconds     |                |                   |               |

## Calibration Settings

| Setting                   | Value  | Date/Time changed   | Imported from             |
|---------------------------|--------|---------------------|---------------------------|
| Four-Plus alpha           | 0.130  | 3/1/2018 3:28:52 PM | C:\Sirius_T3\HCl18B27.t3r |
| Four-Plus S               | 0.9970 | 3/1/2018 3:28:52 PM | C:\Sirius_T3\HCl18B27.t3r |
| Four-Plus jH              | 0.8    | 3/1/2018 3:28:52 PM | C:\Sirius_T3\HCl18B27.t3r |
| Four-Plus jOH             | -0.4   | 3/1/2018 3:28:52 PM | C:\Sirius_T3\HCl18B27.t3r |
| Base concentration factor | 1.000  | 3/1/2018 3:28:52 PM | C:\Sirius_T3\KOH18B27.t3r |
| Acid concentration factor | 0.994  | 3/1/2018 3:28:52 PM | C:\Sirius_T3\HCl18B27.t3r |

## Instrument Settings

| Setting              | Value                      | Batch Id    | Install date           |
|----------------------|----------------------------|-------------|------------------------|
| Instrument owner     | Merck                      |             |                        |
| Instrument ID        | T312060                    |             |                        |
| Instrument type      | T3 Simulator               |             |                        |
| Software version     | 1.1.3.0                    |             |                        |
| Dispenser module     |                            | T3DM1200361 | 3/31/2009 5:24:52 AM   |
| Dispenser 0          | Water                      |             | 3/31/2009 5:25:05 AM   |
| Syringe volume       | 2.5 mL                     |             |                        |
| Firmware version     | 1.2.1(r2)                  |             |                        |
| Titrant              | Water (0.15 M KCl)         | 02-06-2018  | 2/27/2018 10:05:59 AM  |
| Dispenser 2          | Acid                       |             | 3/31/2009 5:25:11 AM   |
| Syringe volume       | 0.5 mL                     |             |                        |
| Firmware version     | 1.2.1(r2)                  |             |                        |
| Titrant              | Acid (0.5 M HCl)           | 02-27-2018  | 2/27/2018 10:27:22 AM  |
| Dispenser 1          | Base                       |             | 3/31/2009 5:25:21 AM   |
| Syringe volume       | 0.5 mL                     |             |                        |
| Firmware version     | 1.2.1(r2)                  |             |                        |
| Titrant              | Base (0.5 M KOH)           | 9/22/2017   | 2/27/2018 10:21:22 AM  |
| Dispenser 5          | Cosolvent                  |             | 3/31/2009 5:26:24 AM   |
| Syringe volume       | 2.5 mL                     |             |                        |
| Firmware version     | 1.2.1(r2)                  |             |                        |
| Distribution valve 5 | Distribution Valve         |             | 3/31/2009 5:28:19 AM   |
| Firmware version     | 1.1.3                      |             |                        |
| Port A               | Methanol (80%, 0.15 M KCl) | 09-26-17    | 2/7/2018 9:42:01 AM    |
| Port B               | Cyclohexane                | 11-01-17    | 2/27/2018 10:37:57 AM  |
| Dispenser 3          | Buffer                     |             | 8/3/2010 5:05:16 AM    |
| Syringe volume       | 0.5 mL                     |             |                        |
| Firmware version     | 1.2.1(r2)                  |             |                        |
| Titrant              | Dodecane                   | 2018/01/31  | 2/28/2018 10:18:04 AM  |
| Dispenser 6          | Octanol                    |             | 10/22/2010 10:52:43 AM |
| Syringe volume       | 0.5 mL                     |             |                        |

Sample name: **M12\_octanol**  
Assay name: **pH-metric high logP**  
Assay ID: **18C-01012**  
Filename: **C:\Sirius\_T3\Mehtap\20180228\_exp28\_logP\_T3-2\18C-01012\_M12\_octanol\_pH-metric high logP.t3r**

Experiment start time: **3/1/2018 3:28:52 PM**  
Analyst: **Pion**  
Instrument ID: **T312060**

## Instrument Settings (continued)

| Setting                                   | Value                      | Batch Id    | Install date           |
|-------------------------------------------|----------------------------|-------------|------------------------|
| Firmware version                          | 1.2.1(r2)                  |             |                        |
| Titrant                                   | Octanol                    | 01-31-2018  | 2/27/2018 9:59:35 AM   |
| Titration                                 |                            | T3TM1200161 | 3/31/2009 5:24:17 AM   |
| Horizontal axis firmware version          | 1.17 AI1DI2DO2 Stepper 2   |             |                        |
| Vertical axis firmware version            | 1.17 AI1DI2DO2 Stepper 2   |             |                        |
| Chassis I/O firmware version              | 1.11 AI1DI0DO4 Norgren I/O |             |                        |
| Probe I/O firmware version                | 1.1.1                      |             |                        |
| Electrode                                 | T3 Electrode               | T3E0923     | 1/23/2018 2:01:00 PM   |
| E0 calibration                            | +2.90 mV                   |             | 3/1/2018 3:29:20 PM    |
| Filling solution                          | 3M KCl                     | KCL097      | 2/27/2018 9:49:43 AM   |
| Liquids                                   |                            |             |                        |
| Wash 1                                    | 50% IPA:50% Water          |             | 2/28/2018 10:23:32 AM  |
| Wash 2                                    | 0.5% Triton X-100 in H2O   |             | 2/28/2018 10:23:34 AM  |
| Buffer position 1                         | pH7 Wash                   |             | 2/28/2018 10:24:06 AM  |
| Buffer position 2                         | pH 7                       |             | 2/28/2018 10:24:08 AM  |
| Storage position                          |                            |             | 2/28/2018 10:21:14 AM  |
| Wash water                                | 8.1e+003 mL                | 02-27-2018  | 2/27/2018 9:54:39 AM   |
| Waste                                     | 7.4e+003 mL                |             | 11/28/2017 10:36:29 AM |
| Temperature controller                    |                            |             | 8/5/2010 6:35:13 AM    |
| Turbidity detector                        |                            |             | 3/31/2009 5:24:45 AM   |
| Spectrometer                              |                            | 074811      | 11/23/2010 11:22:28 AM |
| Dip probe                                 |                            | 10196       |                        |
| Wavelength coefficient A0                 | 183.333                    |             |                        |
| Wavelength coefficient A1                 | 2.21568                    |             |                        |
| Wavelength coefficient A2                 | -0.000289308               |             |                        |
| Total lamp lit time                       | 112:08:55                  |             | 11/23/2010 11:22:28 AM |
| Calibrated on                             | 2/27/2018 10:40:38 AM      |             |                        |
| Integration time                          | 40                         |             |                        |
| Scans averaged                            | 10                         |             |                        |
| Autoloader                                |                            | T3AL1200345 | 11/10/2015 9:34:13 AM  |
| Left-right axis firmware version          | 1.17 AI1DI2DO2 Stepper 2   |             |                        |
| Front-back axis firmware version          | 1.17 AI1DI2DO2 Stepper 2   |             |                        |
| Vertical axis firmware version            | 1.17 AI1DI2DO2 Stepper 2   |             |                        |
| Chassis I/O firmware version              | 1.11 AI1DI0DO4 Norgren I/O |             |                        |
| Configuration                             |                            |             |                        |
| Alternate titration position              | Titration position         |             |                        |
| Alternate reference position              | Reference position         |             |                        |
| Maximum standard vial volume              | 3.50 mL                    |             |                        |
| Maximum alternate vial volume             | 25.00 mL                   |             |                        |
| Automatic action idle period              | 5 minute(s)                |             |                        |
| Titration tube volume                     | 1.3 mL                     |             |                        |
| Syringe flush count                       | 3.50                       |             |                        |
| Flowing wash pump volume                  | 20.0 mL                    |             |                        |
| Flowing wash stir duration                | 5 s                        |             |                        |
| Flowing wash stir speed                   | 30%                        |             |                        |
| Solvent wash stir duration                | 5 s                        |             |                        |
| Solvent wash stir speed                   | 30%                        |             |                        |
| Surfactant wash stir duration             | 5 s                        |             |                        |
| Surfactant wash stir speed                | 30%                        |             |                        |
| E0 calibration minimum number of points   | 10                         |             |                        |
| E0 calibration maximum standard deviation | 0.01500                    |             |                        |
| E0 calibration timeout period             | 60 s                       |             |                        |
| E0 calibration stir duration              | 5 s                        |             |                        |
| E0 calibration preparation stir speed     | 30%                        |             |                        |
| E0 calibration buffer wash stir duration  | 5 s                        |             |                        |
| E0 calibration buffer wash stir speed     | 30%                        |             |                        |
| E0 calibration reading stir speed         | 0%                         |             |                        |
| Spectrometer calibration stir duration    | 5 s                        |             |                        |

Sample name: **M12\_octanol** Experiment start time: **3/1/2018 3:28:52 PM**  
 Assay name: **pH-metric high logP** Analyst: **Pion**  
 Assay ID: **18C-01012** Instrument ID: **T312060**  
 Filename: **C:\Sirius\_T3\Mehtap\20180228\_exp28\_logP\_T3-2\18C-01012\_M12\_octanol\_pH-metric high logP.t3r**

## Instrument Settings (continued)

| Setting                                     | Value   | Batch Id | Install date |
|---------------------------------------------|---------|----------|--------------|
| Spectrometer calibration stir speed         | 30%     |          |              |
| Spectrometer calibration wash pump volume   | 20.0 mL |          |              |
| Spectrometer calibration wash stir duration | 5 s     |          |              |
| Spectrometer calibration wash stir speed    | 30%     |          |              |
| Overhead dispense height                    | 10000   |          |              |

## Refinement Settings

| Setting                        | Value    | Default value |
|--------------------------------|----------|---------------|
| Turbidity detection method     | None     | None          |
| Turbidity wavelength to assess | 500.0 nm | 500.0 nm      |
| Turbidity maximum absorbance   | 0.100    | 0.100         |
| Turbidity probe threshold      | 50.00    | 50.00         |

## Experiment Log

[2:38] Air gap created for Water (0.15 M KCl)  
 [2:38] Air gap created for Acid (0.5 M HCl)  
 [2:38] Air gap created for Base (0.5 M KOH)  
 [2:39] Air gap released for Water (0.15 M KCl)  
 [2:44] Titrator arm moved to Titration position  
 [2:44] Argon flow rate set to 100  
 [2:44] Titration 1 of 3  
 [2:44] Adding initial titrants  
 [2:44] Automatically add 1.50000 mL of water  
 [3:09] Dispensed 1.500000 mL of Water (0.15 M KCl)  
 [3:09] Stirrer speed set to 10  
 [3:14] Automatically add 0.02000 mL of Octanol  
 [3:15] Dispensed 0.019991 mL of Octanol  
 [3:16] Initial pH = 4.96  
 [3:16] Iterative adjust 4.96 -> 2.00  
 [3:16] pH 4.96 -> 2.00  
 [3:18] Air gap released for Acid (0.5 M HCl)  
 [3:18] Dispensed 0.052211 mL of Acid (0.5 M HCl)  
 [3:23] Holding pH 2.00  
 [5:23] Stirrer speed set to 0  
 [5:23] Stirrer speed set to 50  
 [5:23] Iterative adjust 1.89 -> 2.00  
 [5:23] pH 1.89 -> 2.00  
 [5:24] Air gap released for Base (0.5 M KOH)  
 [5:25] Dispensed 0.013288 mL of Base (0.5 M KOH)  
 [6:15] Stirrer speed set to 0  
 [6:26] Datapoint id 1 collected  
 [6:26] Stirrer speed set to 50  
 [6:31] pH 2.04 -> 2.24  
 [6:31] Using cautious pH adjust  
 [6:31] Dispensed 0.007314 mL of Base (0.5 M KOH)  
 [6:36] Stepping pH = 2.12  
 [6:36] Dispensed 0.005974 mL of Base (0.5 M KOH)  
 [6:41] Stepping pH = 2.22  
 [6:42] Dispensed 0.001105 mL of Base (0.5 M KOH)  
 [6:47] Stepping pH = 2.24  
 [7:02] Stirrer speed set to 0  
 [7:12] Datapoint id 2 collected  
 [7:12] Charge balance equation is out by 1.6%  
 [7:12] Stirrer speed set to 50  
 [7:17] pH 2.26 -> 2.46  
 [7:17] Using charge balance adjust  
 [7:17] Dispensed 0.008843 mL of Base (0.5 M KOH)

Sample name: **M12\_octanol**  
Assay name: **pH-metric high logP**  
Assay ID: **18C-01012**  
Filename: **C:\Sirius\_T3\Mehtap\20180228\_exp28\_logP\_T3-2\18C-01012\_M12\_octanol\_pH-metric high logP.t3r**

Experiment start time: **3/1/2018 3:28:52 PM**  
Analyst: **Pion**  
Instrument ID: **T312060**

## Experiment Log (continued)

[7:37] Stirrer speed set to 0  
[7:47] Datapoint id 3 collected  
[7:47] Charge balance equation is out by 4.9%  
[7:47] Stirrer speed set to 50  
[7:53] pH 2.48 -> 2.68  
[7:53] Using charge balance adjust  
[7:53] Dispensed 0.005456 mL of Base (0.5 M KOH)  
[8:13] Stirrer speed set to 0  
[8:41] Datapoint id 4 collected  
[8:41] Charge balance equation is out by -2.2%  
[8:41] Stirrer speed set to 50  
[8:46] pH 2.68 -> 2.88  
[8:46] Using charge balance adjust  
[8:46] Dispensed 0.003622 mL of Base (0.5 M KOH)  
[9:07] Stirrer speed set to 0  
[9:17] Datapoint id 5 collected  
[9:17] Charge balance equation is out by 9.1%  
[9:17] Stirrer speed set to 50  
[9:22] pH 2.90 -> 3.10  
[9:22] Using charge balance adjust  
[9:22] Dispensed 0.002493 mL of Base (0.5 M KOH)  
[9:42] Stirrer speed set to 0  
[9:52] Datapoint id 6 collected  
[9:52] Charge balance equation is out by -16.5%  
[9:52] Stirrer speed set to 50  
[9:57] pH 3.07 -> 3.27  
[9:57] Using cautious pH adjust  
[9:57] Dispensed 0.001011 mL of Base (0.5 M KOH)  
[10:02] Stepping pH = 3.12  
[10:02] Dispensed 0.001317 mL of Base (0.5 M KOH)  
[10:08] Stepping pH = 3.24  
[10:08] Dispensed 0.000212 mL of Base (0.5 M KOH)  
[10:13] Stepping pH = 3.25  
[10:13] Dispensed 0.000212 mL of Base (0.5 M KOH)  
[10:18] Stepping pH = 3.27  
[10:33] Stirrer speed set to 0  
[10:44] Datapoint id 7 collected  
[10:44] Charge balance equation is out by -36.5%  
[10:44] Stirrer speed set to 50  
[10:49] pH 3.27 -> 3.47  
[10:49] Using cautious pH adjust  
[10:49] Dispensed 0.000894 mL of Base (0.5 M KOH)  
[10:54] Stepping pH = 3.35  
[10:54] Dispensed 0.000847 mL of Base (0.5 M KOH)  
[10:59] Stepping pH = 3.46  
[11:14] Stirrer speed set to 0  
[11:25] Datapoint id 8 collected  
[11:25] Charge balance equation is out by 2.1%  
[11:25] Stirrer speed set to 50  
[11:30] pH 3.48 -> 3.68  
[11:30] Using charge balance adjust  
[11:30] Dispensed 0.001693 mL of Base (0.5 M KOH)  
[11:50] Stirrer speed set to 0  
[12:01] Datapoint id 9 collected  
[12:01] Charge balance equation is out by 39.1%  
[12:01] Stirrer speed set to 50  
[12:06] pH 3.73 -> 3.93  
[12:06] Using cautious pH adjust  
[12:06] Dispensed 0.000823 mL of Base (0.5 M KOH)

Sample name: **M12\_octanol**  
Assay name: **pH-metric high logP**  
Assay ID: **18C-01012**  
Filename: **C:\Sirius\_T3\Mehtap\20180228\_exp28\_logP\_T3-2\18C-01012\_M12\_octanol\_pH-metric high logP.t3r**

Experiment start time: **3/1/2018 3:28:52 PM**  
Analyst: **Pion**  
Instrument ID: **T312060**

## Experiment Log (continued)

[12:11] Stepping pH = 3.85  
[12:11] Dispensed 0.000447 mL of Base (0.5 M KOH)  
[12:16] Stepping pH = 3.94  
[12:31] Stirrer speed set to 0  
[12:45] Datapoint id 10 collected  
[12:45] Charge balance equation is out by 22.7%  
[12:45] Stirrer speed set to 50  
[12:50] pH 3.90 -> 4.10  
[12:50] Using cautious pH adjust  
[12:51] Dispensed 0.000800 mL of Base (0.5 M KOH)  
[12:56] Stepping pH = 4.04  
[12:56] Dispensed 0.000306 mL of Base (0.5 M KOH)  
[13:01] Stepping pH = 4.12  
[13:16] Stirrer speed set to 0  
[13:29] Datapoint id 11 collected  
[13:29] Charge balance equation is out by 30.8%  
[13:29] Stirrer speed set to 50  
[13:34] pH 4.13 -> 4.33  
[13:34] Using cautious pH adjust  
[13:34] Dispensed 0.000706 mL of Base (0.5 M KOH)  
[13:39] Stepping pH = 4.30  
[13:39] Dispensed 0.000094 mL of Base (0.5 M KOH)  
[13:44] Stepping pH = 4.35  
[14:00] Stirrer speed set to 0  
[14:14] Datapoint id 12 collected  
[14:14] Charge balance equation is out by 42.4%  
[14:14] Stirrer speed set to 50  
[14:19] pH 4.31 -> 4.51  
[14:19] Using cautious pH adjust  
[14:19] Dispensed 0.000588 mL of Base (0.5 M KOH)  
[14:24] Stepping pH = 4.55  
[14:39] Stirrer speed set to 0  
[14:56] Datapoint id 13 collected  
[14:56] Charge balance equation is out by 50.0%  
[14:56] Stirrer speed set to 50  
[15:01] pH 4.55 -> 4.75  
[15:01] Using cautious pH adjust  
[15:01] Dispensed 0.000423 mL of Base (0.5 M KOH)  
[15:06] Stepping pH = 4.83  
[15:21] Stirrer speed set to 0  
[15:44] Datapoint id 14 collected  
[15:44] Charge balance equation is out by 50.0%  
[15:44] Stirrer speed set to 50  
[15:50] pH 4.82 -> 5.02  
[15:50] Using cautious pH adjust  
[15:50] Dispensed 0.000259 mL of Base (0.5 M KOH)  
[15:55] Stepping pH = 4.97  
[15:55] Dispensed 0.000071 mL of Base (0.5 M KOH)  
[16:00] Stepping pH = 5.06  
[16:15] Stirrer speed set to 0  
[16:43] Datapoint id 15 collected  
[16:43] Charge balance equation is out by 38.3%  
[16:43] Stirrer speed set to 50  
[16:48] pH 5.02 -> 5.22  
[16:48] Using cautious pH adjust  
[16:48] Dispensed 0.000188 mL of Base (0.5 M KOH)  
[16:53] Stepping pH = 5.44  
[17:08] Stirrer speed set to 0  
[17:38] Datapoint id 16 collected

Sample name: **M12\_octanol**  
Assay name: **pH-metric high logP**  
Assay ID: **18C-01012**  
Filename: **C:\Sirius\_T3\Mehtap\20180228\_exp28\_logP\_T3-2\18C-01012\_M12\_octanol\_pH-metric high logP.t3r**

Experiment start time: **3/1/2018 3:28:52 PM**  
Analyst: **Pion**  
Instrument ID: **T312060**

## Experiment Log (continued)

[17:38] Charge balance equation is out by 50.0%  
[17:38] Stirrer speed set to 50  
[17:43] pH 5.43 -> 5.63  
[17:43] Using cautious pH adjust  
[17:43] Dispensed 0.000094 mL of Base (0.5 M KOH)  
[17:48] Stepping pH = 5.54  
[17:48] Dispensed 0.000047 mL of Base (0.5 M KOH)  
[17:53] Stepping pH = 5.77  
[18:08] Stirrer speed set to 0  
[18:40] Datapoint id 17 collected  
[18:40] Charge balance equation is out by 18.4%  
[18:40] Stirrer speed set to 50  
[18:45] pH 5.84 -> 6.04  
[18:45] Using cautious pH adjust  
[18:45] Dispensed 0.000047 mL of Base (0.5 M KOH)  
[18:50] Stepping pH = 5.88  
[18:50] Dispensed 0.000094 mL of Base (0.5 M KOH)  
[18:55] Stepping pH = 6.68  
[19:11] Stirrer speed set to 0  
[20:11] Datapoint id 18 collected  
[20:11] Charge balance equation is out by -44.4%  
[20:11] Stirrer speed set to 50  
[20:16] pH 6.88 -> 7.08  
[20:16] Using cautious pH adjust  
[20:16] Dispensed 0.000024 mL of Base (0.5 M KOH)  
[20:21] Stepping pH = 6.87  
[20:21] Dispensed 0.000071 mL of Base (0.5 M KOH)  
[20:26] Stepping pH = 7.48  
[20:41] Stirrer speed set to 0  
[21:41] Datapoint id 19 collected  
[21:41] Charge balance equation is out by -232.0%  
[21:41] Stirrer speed set to 50  
[21:46] pH 7.52 -> 7.72  
[21:46] Using cautious pH adjust  
[21:46] Dispensed 0.000024 mL of Base (0.5 M KOH)  
[21:51] Stepping pH = 7.42  
[21:51] Dispensed 0.000024 mL of Base (0.5 M KOH)  
[21:56] Stepping pH = 7.45  
[21:57] Dispensed 0.000094 mL of Base (0.5 M KOH)  
[22:02] Stepping pH = 8.76  
[22:17] Stirrer speed set to 0  
[23:10] Datapoint id 20 collected  
[23:10] Charge balance equation is out by -1,588.8%  
[23:10] Stirrer speed set to 50  
[23:15] pH 8.90 -> 9.05  
[23:15] Using cautious pH adjust  
[23:15] Dispensed 0.000024 mL of Base (0.5 M KOH)  
[23:21] Stepping pH = 8.90  
[23:21] Dispensed 0.000071 mL of Base (0.5 M KOH)  
[23:26] Stepping pH = 9.05  
[23:41] Stirrer speed set to 0  
[24:07] Datapoint id 21 collected  
[24:07] Charge balance equation is out by -237.3%  
[24:07] Titration 2 of 3  
[24:07] Adding initial titrants  
[24:07] Automatically add 0.03000 mL of Octanol  
[24:08] Dispensed 0.030009 mL of Octanol  
[24:08] Stirrer speed set to 10  
[24:09] Stirrer speed set to 55



Sample name: **M12\_octanol**  
Assay name: **pH-metric high logP**  
Assay ID: **18C-01012**  
Filename: **C:\Sirius\_T3\Mehtap\20180228\_exp28\_logP\_T3-2\18C-01012\_M12\_octanol\_pH-metric high logP.t3r**

Experiment start time: **3/1/2018 3:28:52 PM**  
Analyst: **Pion**  
Instrument ID: **T312060**

## Experiment Log (continued)

[24:09] Iterative adjust 9.11 -> 2.00  
[24:09] pH 9.11 -> 2.00  
[24:10] Dispensed 0.056703 mL of Acid (0.5 M HCl)  
[25:01] Stirrer speed set to 0  
[25:11] Datapoint id 22 collected  
[25:11] Stirrer speed set to 55  
[25:16] pH 1.96 -> 2.16  
[25:16] Using cautious pH adjust  
[25:16] Dispensed 0.009572 mL of Base (0.5 M KOH)  
[25:22] Stepping pH = 2.04  
[25:22] Dispensed 0.007832 mL of Base (0.5 M KOH)  
[25:27] Stepping pH = 2.13  
[25:27] Dispensed 0.001458 mL of Base (0.5 M KOH)  
[25:32] Stepping pH = 2.16  
[25:47] Stirrer speed set to 0  
[25:57] Datapoint id 23 collected  
[25:57] Charge balance equation is out by 1.5%  
[25:57] Stirrer speed set to 55  
[26:02] pH 2.17 -> 2.37  
[26:02] Using charge balance adjust  
[26:03] Dispensed 0.011618 mL of Base (0.5 M KOH)  
[26:23] Stirrer speed set to 0  
[26:33] Datapoint id 24 collected  
[26:33] Charge balance equation is out by 8.1%  
[26:33] Stirrer speed set to 55  
[26:38] pH 2.40 -> 2.60  
[26:38] Using charge balance adjust  
[26:38] Dispensed 0.007079 mL of Base (0.5 M KOH)  
[26:58] Stirrer speed set to 0  
[27:09] Datapoint id 25 collected  
[27:09] Charge balance equation is out by -3.0%  
[27:09] Stirrer speed set to 55  
[27:14] pH 2.60 -> 2.80  
[27:14] Using charge balance adjust  
[27:14] Dispensed 0.004704 mL of Base (0.5 M KOH)  
[27:35] Stirrer speed set to 0  
[27:45] Datapoint id 26 collected  
[27:45] Charge balance equation is out by 9.3%  
[27:45] Stirrer speed set to 55  
[27:50] pH 2.82 -> 3.02  
[27:50] Using charge balance adjust  
[27:50] Dispensed 0.003175 mL of Base (0.5 M KOH)  
[28:10] Stirrer speed set to 0  
[28:20] Datapoint id 27 collected  
[28:20] Charge balance equation is out by -11.4%  
[28:20] Stirrer speed set to 55  
[28:25] pH 3.00 -> 3.20  
[28:25] Using charge balance adjust  
[28:25] Dispensed 0.002540 mL of Base (0.5 M KOH)  
[28:46] Stirrer speed set to 0  
[28:56] Datapoint id 28 collected  
[28:56] Charge balance equation is out by -6.4%  
[28:56] Stirrer speed set to 55  
[29:01] pH 3.19 -> 3.39  
[29:01] Using charge balance adjust  
[29:01] Dispensed 0.002187 mL of Base (0.5 M KOH)  
[29:22] Stirrer speed set to 0  
[29:32] Datapoint id 29 collected  
[29:32] Charge balance equation is out by 13.7%

Sample name: **M12\_octanol**  
Assay name: **pH-metric high logP**  
Assay ID: **18C-01012**  
Filename: **C:\Sirius\_T3\Mehtap\20180228\_exp28\_logP\_T3-2\18C-01012\_M12\_octanol\_pH-metric high logP.t3r**

Experiment start time: **3/1/2018 3:28:52 PM**  
Analyst: **Pion**  
Instrument ID: **T312060**

## Experiment Log (continued)

[29:32] Stirrer speed set to 55  
[29:37] pH 3.42 -> 3.62  
[29:37] Using charge balance adjust  
[29:37] Dispensed 0.001952 mL of Base (0.5 M KOH)  
[29:57] Stirrer speed set to 0  
[30:07] Datapoint id 30 collected  
[30:07] Charge balance equation is out by 46.6%  
[30:07] Stirrer speed set to 55  
[30:12] pH 3.71 -> 3.91  
[30:12] Using cautious pH adjust  
[30:12] Dispensed 0.000870 mL of Base (0.5 M KOH)  
[30:17] Stepping pH = 3.82  
[30:18] Dispensed 0.000517 mL of Base (0.5 M KOH)  
[30:23] Stepping pH = 3.94  
[30:38] Stirrer speed set to 0  
[30:49] Datapoint id 31 collected  
[30:49] Charge balance equation is out by 20.1%  
[30:49] Stirrer speed set to 55  
[30:54] pH 4.01 -> 4.21  
[30:54] Using cautious pH adjust  
[30:55] Dispensed 0.000659 mL of Base (0.5 M KOH)  
[31:00] Stepping pH = 4.14  
[31:00] Dispensed 0.000259 mL of Base (0.5 M KOH)  
[31:05] Stepping pH = 4.27  
[31:20] Stirrer speed set to 0  
[31:47] Datapoint id 32 collected  
[31:47] Charge balance equation is out by 30.0%  
[31:47] Stirrer speed set to 55  
[31:52] pH 4.31 -> 4.51  
[31:52] Using cautious pH adjust  
[31:52] Dispensed 0.000447 mL of Base (0.5 M KOH)  
[31:57] Stepping pH = 4.55  
[32:12] Stirrer speed set to 0  
[32:37] Datapoint id 33 collected  
[32:37] Charge balance equation is out by 50.0%  
[32:37] Stirrer speed set to 55  
[32:42] pH 4.60 -> 4.80  
[32:42] Using cautious pH adjust  
[32:43] Dispensed 0.000282 mL of Base (0.5 M KOH)  
[32:48] Stepping pH = 4.90  
[33:03] Stirrer speed set to 0  
[33:21] Datapoint id 34 collected  
[33:21] Charge balance equation is out by 50.0%  
[33:21] Stirrer speed set to 55  
[33:26] pH 4.92 -> 5.12  
[33:26] Using cautious pH adjust  
[33:26] Dispensed 0.000141 mL of Base (0.5 M KOH)  
[33:32] Stepping pH = 5.08  
[33:32] Dispensed 0.000024 mL of Base (0.5 M KOH)  
[33:37] Stepping pH = 5.15  
[33:52] Stirrer speed set to 0  
[34:18] Datapoint id 35 collected  
[34:18] Charge balance equation is out by 40.7%  
[34:18] Stirrer speed set to 55  
[34:23] pH 5.16 -> 5.36  
[34:23] Using cautious pH adjust  
[34:23] Dispensed 0.000094 mL of Base (0.5 M KOH)  
[34:29] Stepping pH = 5.26  
[34:29] Dispensed 0.000071 mL of Base (0.5 M KOH)



Sample name: **M12\_octanol**  
Assay name: **pH-metric high logP**  
Assay ID: **18C-01012**  
Filename: **C:\Sirius\_T3\Mehtap\20180228\_exp28\_logP\_T3-2\18C-01012\_M12\_octanol\_pH-metric high logP.t3r**

Experiment start time: **3/1/2018 3:28:52 PM**  
Analyst: **Pion**  
Instrument ID: **T312060**

## Experiment Log (continued)

[34:34] Stepping pH = 5.69  
[34:49] Stirrer speed set to 0  
[35:19] Datapoint id 36 collected  
[35:19] Charge balance equation is out by 17.2%  
[35:19] Stirrer speed set to 55  
[35:24] pH 5.79 -> 5.99  
[35:24] Using cautious pH adjust  
[35:24] Dispensed 0.000047 mL of Base (0.5 M KOH)  
[35:29] Stepping pH = 5.93  
[35:29] Dispensed 0.000024 mL of Base (0.5 M KOH)  
[35:34] Stepping pH = 6.19  
[35:49] Stirrer speed set to 0  
[36:36] Datapoint id 37 collected  
[36:36] Charge balance equation is out by 23.2%  
[36:36] Stirrer speed set to 55  
[36:41] pH 6.24 -> 6.44  
[36:41] Using cautious pH adjust  
[36:41] Dispensed 0.000024 mL of Base (0.5 M KOH)  
[36:46] Stepping pH = 6.26  
[36:46] Dispensed 0.000071 mL of Base (0.5 M KOH)  
[36:51] Stepping pH = 6.71  
[37:06] Stirrer speed set to 0  
[38:06] Datapoint id 38 collected  
[38:06] Charge balance equation is out by -67.6%  
[38:06] Stirrer speed set to 55  
[38:11] pH 6.80 -> 7.00  
[38:11] Using cautious pH adjust  
[38:11] Dispensed 0.000024 mL of Base (0.5 M KOH)  
[38:16] Stepping pH = 6.78  
[38:16] Dispensed 0.000071 mL of Base (0.5 M KOH)  
[38:21] Stepping pH = 7.04  
[38:37] Stirrer speed set to 0  
[39:37] Datapoint id 39 collected  
[39:37] Charge balance equation is out by -246.2%  
[39:37] Stirrer speed set to 55  
[39:42] pH 7.29 -> 7.49  
[39:42] Using cautious pH adjust  
[39:42] Dispensed 0.000024 mL of Base (0.5 M KOH)  
[39:47] Stepping pH = 7.29  
[39:47] Dispensed 0.000024 mL of Base (0.5 M KOH)  
[39:52] Stepping pH = 7.41  
[39:52] Dispensed 0.000024 mL of Base (0.5 M KOH)  
[39:57] Stepping pH = 7.70  
[40:12] Stirrer speed set to 0  
[41:12] Datapoint id 40 collected  
[41:12] Charge balance equation is out by -384.4%  
[41:12] Stirrer speed set to 55  
[41:17] pH 7.79 -> 7.99  
[41:17] Using cautious pH adjust  
[41:17] Dispensed 0.000024 mL of Base (0.5 M KOH)  
[41:22] Stepping pH = 7.81  
[41:22] Dispensed 0.000024 mL of Base (0.5 M KOH)  
[41:28] Stepping pH = 7.95  
[41:28] Dispensed 0.000024 mL of Base (0.5 M KOH)  
[41:33] Stepping pH = 8.17  
[41:48] Stirrer speed set to 0  
[42:48] Datapoint id 41 collected  
[42:48] Charge balance equation is out by -765.5%  
[42:48] Stirrer speed set to 55

Sample name: **M12\_octanol**  
Assay name: **pH-metric high logP**  
Assay ID: **18C-01012**  
Filename: **C:\Sirius\_T3\Mehtap\20180228\_exp28\_logP\_T3-2\18C-01012\_M12\_octanol\_pH-metric high logP.t3r**

Experiment start time: **3/1/2018 3:28:52 PM**  
Analyst: **Pion**  
Instrument ID: **T312060**

## Experiment Log (continued)

[42:53] pH 8.18 -> 8.38  
[42:53] Using cautious pH adjust  
[42:53] Dispensed 0.000024 mL of Base (0.5 M KOH)  
[42:58] Stepping pH = 8.17  
[42:58] Dispensed 0.000024 mL of Base (0.5 M KOH)  
[43:03] Stepping pH = 8.32  
[43:03] Dispensed 0.000024 mL of Base (0.5 M KOH)  
[43:08] Stepping pH = 8.51  
[43:23] Stirrer speed set to 0  
[44:04] Datapoint id 42 collected  
[44:04] Charge balance equation is out by -611.1%  
[44:04] Stirrer speed set to 55  
[44:09] pH 8.54 -> 8.74  
[44:09] Using cautious pH adjust  
[44:10] Dispensed 0.000024 mL of Base (0.5 M KOH)  
[44:15] Stepping pH = 8.56  
[44:15] Dispensed 0.000024 mL of Base (0.5 M KOH)  
[44:20] Stepping pH = 8.64  
[44:20] Dispensed 0.000024 mL of Base (0.5 M KOH)  
[44:25] Stepping pH = 8.75  
[44:40] Stirrer speed set to 0  
[45:14] Datapoint id 43 collected  
[45:14] Charge balance equation is out by -275.0%  
[45:14] Stirrer speed set to 55  
[45:19] pH 8.74 -> 8.94  
[45:19] Using cautious pH adjust  
[45:19] Dispensed 0.000024 mL of Base (0.5 M KOH)  
[45:24] Stepping pH = 8.74  
[45:24] Dispensed 0.000047 mL of Base (0.5 M KOH)  
[45:29] Stepping pH = 8.86  
[45:29] Dispensed 0.000024 mL of Base (0.5 M KOH)  
[45:34] Stepping pH = 8.97  
[45:49] Stirrer speed set to 0  
[46:09] Datapoint id 44 collected  
[46:09] Charge balance equation is out by -212.1%  
[46:09] Stirrer speed set to 55  
[46:14] pH 8.94 -> 9.05  
[46:14] Using cautious pH adjust  
[46:14] Dispensed 0.000024 mL of Base (0.5 M KOH)  
[46:19] Stepping pH = 8.94  
[46:19] Dispensed 0.000047 mL of Base (0.5 M KOH)  
[46:24] Stepping pH = 9.01  
[46:39] Stirrer speed set to 0  
[46:56] Datapoint id 45 collected  
[46:56] Charge balance equation is out by -261.0%  
[46:56] Titration 3 of 3  
[46:56] Adding initial titrants  
[46:56] Automatically add 0.20000 mL of Octanol  
[47:01] Dispensed 0.200000 mL of Octanol  
[47:01] Stirrer speed set to 10  
[47:02] Stirrer speed set to 60  
[47:02] Iterative adjust 9.05 -> 2.00  
[47:02] pH 9.05 -> 2.00  
[47:04] Dispensed 0.059690 mL of Acid (0.5 M HCl)  
[47:54] Stirrer speed set to 0  
[48:04] Datapoint id 46 collected  
[48:04] Stirrer speed set to 60  
[48:10] pH 1.96 -> 2.16  
[48:10] Using cautious pH adjust

Sample name: **M12\_octanol**  
 Assay name: **pH-metric high logP**  
 Assay ID: **18C-01012**  
 Filename: **C:\Sirius\_T3\Mehtap\20180228\_exp28\_logP\_T3-2\18C-01012\_M12\_octanol\_pH-metric high logP.t3r**

Experiment start time: **3/1/2018 3:28:52 PM**  
 Analyst: **Pion**  
 Instrument ID: **T312060**

## Experiment Log (continued)

[48:10] Dispensed 0.010113 mL of Base (0.5 M KOH)  
 [48:15] Stepping pH = 2.05  
 [48:15] Dispensed 0.007361 mL of Base (0.5 M KOH)  
 [48:20] Stepping pH = 2.13  
 [48:21] Dispensed 0.001999 mL of Base (0.5 M KOH)  
 [48:26] Stepping pH = 2.16  
 [48:41] Stirrer speed set to 0  
 [48:51] Datapoint id 47 collected  
 [48:51] Charge balance equation is out by 3.8%  
 [48:51] Stirrer speed set to 60  
 [48:56] pH 2.18 -> 2.38  
 [48:56] Using charge balance adjust  
 [48:56] Dispensed 0.012347 mL of Base (0.5 M KOH)  
 [49:16] Stirrer speed set to 0  
 [49:27] Datapoint id 48 collected  
 [49:27] Charge balance equation is out by 4.8%  
 [49:27] Stirrer speed set to 60  
 [49:32] pH 2.39 -> 2.59  
 [49:32] Using charge balance adjust  
 [49:32] Dispensed 0.007738 mL of Base (0.5 M KOH)  
 [49:52] Stirrer speed set to 0  
 [50:02] Datapoint id 49 collected  
 [50:02] Charge balance equation is out by -10.9%  
 [50:02] Stirrer speed set to 60  
 [50:07] pH 2.58 -> 2.78  
 [50:07] Using charge balance adjust  
 [50:07] Dispensed 0.005409 mL of Base (0.5 M KOH)  
 [50:28] Stirrer speed set to 0  
 [50:38] Datapoint id 50 collected  
 [50:38] Charge balance equation is out by -1.8%  
 [50:38] Stirrer speed set to 60  
 [50:43] pH 2.78 -> 2.98  
 [50:43] Using charge balance adjust  
 [50:43] Dispensed 0.003833 mL of Base (0.5 M KOH)  
 [51:03] Stirrer speed set to 0  
 [51:13] Datapoint id 51 collected  
 [51:13] Charge balance equation is out by -0.7%  
 [51:13] Stirrer speed set to 60  
 [51:18] pH 2.99 -> 3.19  
 [51:18] Using charge balance adjust  
 [51:18] Dispensed 0.002963 mL of Base (0.5 M KOH)  
 [51:39] Stirrer speed set to 0  
 [51:49] Datapoint id 52 collected  
 [51:49] Charge balance equation is out by 41.2%  
 [51:49] Stirrer speed set to 60  
 [51:54] pH 3.28 -> 3.48  
 [51:54] Using cautious pH adjust  
 [51:54] Dispensed 0.001152 mL of Base (0.5 M KOH)  
 [51:59] Stepping pH = 3.38  
 [51:59] Dispensed 0.000729 mL of Base (0.5 M KOH)  
 [52:04] Stepping pH = 3.51  
 [52:19] Stirrer speed set to 0  
 [52:35] Datapoint id 53 collected  
 [52:35] Charge balance equation is out by 18.3%  
 [52:35] Stirrer speed set to 60  
 [52:40] pH 3.56 -> 3.76  
 [52:40] Using cautious pH adjust  
 [52:40] Dispensed 0.000917 mL of Base (0.5 M KOH)  
 [52:45] Stepping pH = 3.68

Sample name: **M12\_octanol**  
Assay name: **pH-metric high logP**  
Assay ID: **18C-01012**  
Filename: **C:\Sirius\_T3\Mehtap\20180228\_exp28\_logP\_T3-2\18C-01012\_M12\_octanol\_pH-metric high logP.t3r**

Experiment start time: **3/1/2018 3:28:52 PM**  
Analyst: **Pion**  
Instrument ID: **T312060**

## Experiment Log (continued)

[52:45] Dispensed 0.000447 mL of Base (0.5 M KOH)  
[52:50] Stepping pH = 3.81  
[53:05] Stirrer speed set to 0  
[53:16] Datapoint id 54 collected  
[53:16] Charge balance equation is out by 25.4%  
[53:16] Stirrer speed set to 60  
[53:21] pH 3.89 -> 4.09  
[53:21] Using cautious pH adjust  
[53:21] Dispensed 0.000659 mL of Base (0.5 M KOH)  
[53:26] Stepping pH = 4.07  
[53:26] Dispensed 0.000047 mL of Base (0.5 M KOH)  
[53:31] Stepping pH = 4.21  
[53:47] Stirrer speed set to 0  
[53:57] Datapoint id 55 collected  
[53:57] Charge balance equation is out by 45.6%  
[53:57] Stirrer speed set to 60  
[54:02] pH 4.23 -> 4.43  
[54:02] Using cautious pH adjust  
[54:02] Dispensed 0.000376 mL of Base (0.5 M KOH)  
[54:07] Stepping pH = 4.66  
[54:22] Stirrer speed set to 0  
[54:35] Datapoint id 56 collected  
[54:35] Charge balance equation is out by 50.0%  
[54:35] Stirrer speed set to 60  
[54:41] pH 4.69 -> 4.89  
[54:41] Using cautious pH adjust  
[54:41] Dispensed 0.000165 mL of Base (0.5 M KOH)  
[54:46] Stepping pH = 4.90  
[55:01] Stirrer speed set to 0  
[55:14] Datapoint id 57 collected  
[55:14] Charge balance equation is out by 50.0%  
[55:14] Stirrer speed set to 60  
[55:19] pH 4.82 -> 5.02  
[55:19] Using cautious pH adjust  
[55:19] Dispensed 0.000118 mL of Base (0.5 M KOH)  
[55:24] Stepping pH = 4.96  
[55:24] Dispensed 0.000047 mL of Base (0.5 M KOH)  
[55:29] Stepping pH = 5.07  
[55:44] Stirrer speed set to 0  
[55:59] Datapoint id 58 collected  
[55:59] Charge balance equation is out by 35.4%  
[55:59] Stirrer speed set to 60  
[56:04] pH 5.04 -> 5.24  
[56:04] Using cautious pH adjust  
[56:04] Dispensed 0.000071 mL of Base (0.5 M KOH)  
[56:09] Stepping pH = 5.24  
[56:24] Stirrer speed set to 0  
[56:42] Datapoint id 59 collected  
[56:42] Charge balance equation is out by 50.0%  
[56:42] Stirrer speed set to 60  
[56:47] pH 5.18 -> 5.38  
[56:47] Using cautious pH adjust  
[56:47] Dispensed 0.000071 mL of Base (0.5 M KOH)  
[56:52] Stepping pH = 5.28  
[56:52] Dispensed 0.000047 mL of Base (0.5 M KOH)  
[56:57] Stepping pH = 5.44  
[57:12] Stirrer speed set to 0  
[57:26] Datapoint id 60 collected  
[57:26] Charge balance equation is out by 17.2%

Sample name: **M12\_octanol**  
Assay name: **pH-metric high logP**  
Assay ID: **18C-01012**  
Filename: **C:\Sirius\_T3\Mehtap\20180228\_exp28\_logP\_T3-2\18C-01012\_M12\_octanol\_pH-metric high logP.t3r**

Experiment start time: **3/1/2018 3:28:52 PM**  
Analyst: **Pion**  
Instrument ID: **T312060**

## Experiment Log (continued)

[57:26] Stirrer speed set to 60  
[57:31] pH 5.44 -> 5.64  
[57:31] Using cautious pH adjust  
[57:31] Dispensed 0.000047 mL of Base (0.5 M KOH)  
[57:36] Stepping pH = 5.52  
[57:36] Dispensed 0.000024 mL of Base (0.5 M KOH)  
[57:41] Stepping pH = 5.57  
[57:41] Dispensed 0.000024 mL of Base (0.5 M KOH)  
[57:46] Stepping pH = 5.67  
[58:01] Stirrer speed set to 0  
[58:26] Datapoint id 61 collected  
[58:26] Charge balance equation is out by -31.4%  
[58:26] Stirrer speed set to 60  
[58:31] pH 5.57 -> 5.77  
[58:31] Using cautious pH adjust  
[58:31] Dispensed 0.000024 mL of Base (0.5 M KOH)  
[58:36] Stepping pH = 5.60  
[58:36] Dispensed 0.000094 mL of Base (0.5 M KOH)  
[58:41] Stepping pH = 6.29  
[58:56] Stirrer speed set to 0  
[59:52] Datapoint id 62 collected  
[59:52] Charge balance equation is out by -71.8%  
[59:52] Stirrer speed set to 60  
[59:57] pH 5.94 -> 6.14  
[59:57] Using cautious pH adjust  
[59:57] Dispensed 0.000024 mL of Base (0.5 M KOH)  
[1:00:02] Stepping pH = 5.95  
[1:00:02] Dispensed 0.000071 mL of Base (0.5 M KOH)  
[1:00:07] Stepping pH = 6.30  
[1:00:22] Stirrer speed set to 0  
[1:00:36] Datapoint id 63 collected  
[1:00:36] Charge balance equation is out by -89.9%  
[1:00:36] Stirrer speed set to 60  
[1:00:41] pH 6.12 -> 6.32  
[1:00:41] Using cautious pH adjust  
[1:00:41] Dispensed 0.000024 mL of Base (0.5 M KOH)  
[1:00:46] Stepping pH = 6.16  
[1:00:46] Dispensed 0.000047 mL of Base (0.5 M KOH)  
[1:00:51] Stepping pH = 6.48  
[1:01:06] Stirrer speed set to 0  
[1:02:06] Datapoint id 64 collected  
[1:02:06] Charge balance equation is out by -38.2%  
[1:02:06] Stirrer speed set to 60  
[1:02:11] pH 6.11 -> 6.31  
[1:02:11] Using cautious pH adjust  
[1:02:11] Dispensed 0.000024 mL of Base (0.5 M KOH)  
[1:02:16] Stepping pH = 6.18  
[1:02:16] Dispensed 0.000024 mL of Base (0.5 M KOH)  
[1:02:22] Stepping pH = 6.34  
[1:02:37] Stirrer speed set to 0  
[1:02:47] Datapoint id 65 collected  
[1:02:47] Charge balance equation is out by -6.6%  
[1:02:47] Stirrer speed set to 60  
[1:02:52] pH 6.05 -> 6.25  
[1:02:52] Using charge balance adjust  
[1:02:52] Dispensed 0.000047 mL of Base (0.5 M KOH)  
[1:03:12] Stirrer speed set to 0  
[1:03:47] Datapoint id 66 collected  
[1:03:47] Charge balance equation is out by -98.3%

Sample name: **M12\_octanol**  
Assay name: **pH-metric high logP**  
Assay ID: **18C-01012**  
Filename: **C:\Sirius\_T3\Mehtap\20180228\_exp28\_logP\_T3-2\18C-01012\_M12\_octanol\_pH-metric high logP.t3r**

Experiment start time: **3/1/2018 3:28:52 PM**  
Analyst: **Pion**  
Instrument ID: **T312060**

## Experiment Log (continued)

[1:03:47] Stirrer speed set to 60  
[1:03:52] pH 5.78 -> 5.98  
[1:03:52] Using cautious pH adjust  
[1:03:52] Dispensed 0.000024 mL of Base (0.5 M KOH)  
[1:03:57] Stepping pH = 5.98  
[1:04:12] Stirrer speed set to 0  
[1:04:52] Datapoint id 67 collected  
[1:04:52] Charge balance equation is out by 50.0%  
[1:04:52] Stirrer speed set to 60  
[1:04:57] pH 5.76 -> 5.96  
[1:04:57] Using cautious pH adjust  
[1:04:57] Dispensed 0.000024 mL of Base (0.5 M KOH)  
[1:05:02] Stepping pH = 5.85  
[1:05:02] Dispensed 0.000024 mL of Base (0.5 M KOH)  
[1:05:07] Stepping pH = 6.07  
[1:05:22] Stirrer speed set to 0  
[1:05:59] Datapoint id 68 collected  
[1:05:59] Charge balance equation is out by 7.8%  
[1:05:59] Stirrer speed set to 60  
[1:06:04] pH 5.71 -> 5.91  
[1:06:04] Using charge balance adjust  
[1:06:04] Dispensed 0.000071 mL of Base (0.5 M KOH)  
[1:06:24] Stirrer speed set to 0  
[1:06:37] Datapoint id 69 collected  
[1:06:37] Charge balance equation is out by 33.1%  
[1:06:37] Stirrer speed set to 60  
[1:06:42] pH 5.84 -> 6.04  
[1:06:42] Using cautious pH adjust  
[1:06:43] Dispensed 0.000024 mL of Base (0.5 M KOH)  
[1:06:48] Stepping pH = 5.96  
[1:06:48] Dispensed 0.000024 mL of Base (0.5 M KOH)  
[1:06:53] Stepping pH = 6.21  
[1:07:08] Stirrer speed set to 0  
[1:07:25] Datapoint id 70 collected  
[1:07:25] Charge balance equation is out by 15.2%  
[1:07:25] Stirrer speed set to 60  
[1:07:30] pH 5.94 -> 6.14  
[1:07:30] Using cautious pH adjust  
[1:07:31] Dispensed 0.000024 mL of Base (0.5 M KOH)  
[1:07:36] Stepping pH = 6.12  
[1:07:36] Dispensed 0.000024 mL of Base (0.5 M KOH)  
[1:07:41] Stepping pH = 6.28  
[1:07:56] Stirrer speed set to 0  
[1:08:27] Datapoint id 71 collected  
[1:08:27] Charge balance equation is out by 14.3%  
[1:08:27] Stirrer speed set to 60  
[1:08:32] pH 6.04 -> 6.24  
[1:08:32] Using charge balance adjust  
[1:08:32] Dispensed 0.000047 mL of Base (0.5 M KOH)  
[1:08:52] Stirrer speed set to 0  
[1:09:08] Datapoint id 72 collected  
[1:09:08] Charge balance equation is out by 29.3%  
[1:09:08] Stirrer speed set to 60  
[1:09:13] pH 6.21 -> 6.41  
[1:09:13] Using cautious pH adjust  
[1:09:13] Dispensed 0.000024 mL of Base (0.5 M KOH)  
[1:09:18] Stepping pH = 6.32  
[1:09:18] Dispensed 0.000024 mL of Base (0.5 M KOH)  
[1:09:23] Stepping pH = 6.47



Sample name: **M12\_octanol**  
Assay name: **pH-metric high logP**  
Assay ID: **18C-01012**  
Filename: **C:\Sirius\_T3\Mehtap\20180228\_exp28\_logP\_T3-2\18C-01012\_M12\_octanol\_pH-metric high logP.t3r**

Experiment start time: **3/1/2018 3:28:52 PM**  
Analyst: **Pion**  
Instrument ID: **T312060**

## Experiment Log (continued)

[1:09:38] Stirrer speed set to 0  
[1:09:55] Datapoint id 73 collected  
[1:09:55] Charge balance equation is out by 11.9%  
[1:09:55] Stirrer speed set to 60  
[1:10:01] pH 6.23 -> 6.43  
[1:10:01] Using charge balance adjust  
[1:10:01] Dispensed 0.000047 mL of Base (0.5 M KOH)  
[1:10:21] Stirrer speed set to 0  
[1:10:36] Datapoint id 74 collected  
[1:10:36] Charge balance equation is out by 6.5%  
[1:10:36] Stirrer speed set to 60  
[1:10:41] pH 6.39 -> 6.59  
[1:10:41] Using charge balance adjust  
[1:10:41] Dispensed 0.000047 mL of Base (0.5 M KOH)  
[1:11:01] Stirrer speed set to 0  
[1:11:59] Datapoint id 75 collected  
[1:11:59] Charge balance equation is out by -41.6%  
[1:11:59] Stirrer speed set to 60  
[1:12:04] pH 5.94 -> 6.14  
[1:12:04] Using cautious pH adjust  
[1:12:04] Dispensed 0.000024 mL of Base (0.5 M KOH)  
[1:12:09] Stepping pH = 5.92  
[1:12:09] Dispensed 0.000141 mL of Base (0.5 M KOH)  
[1:12:14] Stepping pH = 7.15  
[1:12:29] Stirrer speed set to 0  
[1:13:29] Datapoint id 76 collected  
[1:13:29] Charge balance equation is out by -219.5%  
[1:13:29] Stirrer speed set to 60  
[1:13:34] pH 6.70 -> 6.90  
[1:13:34] Using cautious pH adjust  
[1:13:34] Dispensed 0.000024 mL of Base (0.5 M KOH)  
[1:13:40] Stepping pH = 6.66  
[1:13:40] Dispensed 0.000118 mL of Base (0.5 M KOH)  
[1:13:45] Stepping pH = 7.66  
[1:14:00] Stirrer speed set to 0  
[1:15:00] Datapoint id 77 collected  
[1:15:00] Charge balance equation is out by -255.5%  
[1:15:00] Stirrer speed set to 60  
[1:15:05] pH 7.53 -> 7.73  
[1:15:05] Using cautious pH adjust  
[1:15:05] Dispensed 0.000024 mL of Base (0.5 M KOH)  
[1:15:10] Stepping pH = 7.55  
[1:15:10] Dispensed 0.000024 mL of Base (0.5 M KOH)  
[1:15:15] Stepping pH = 7.66  
[1:15:15] Dispensed 0.000024 mL of Base (0.5 M KOH)  
[1:15:20] Stepping pH = 7.84  
[1:15:35] Stirrer speed set to 0  
[1:16:35] Datapoint id 78 collected  
[1:16:35] Charge balance equation is out by -467.5%  
[1:16:35] Stirrer speed set to 60  
[1:16:41] pH 7.53 -> 7.73  
[1:16:41] Using cautious pH adjust  
[1:16:41] Dispensed 0.000024 mL of Base (0.5 M KOH)  
[1:16:46] Stepping pH = 7.43  
[1:16:46] Dispensed 0.000047 mL of Base (0.5 M KOH)  
[1:16:51] Stepping pH = 7.78  
[1:17:06] Stirrer speed set to 0  
[1:18:06] Datapoint id 79 collected  
[1:18:06] Charge balance equation is out by -479.6%

Sample name: **M12\_octanol**  
Assay name: **pH-metric high logP**  
Assay ID: **18C-01012**  
Filename: **C:\Sirius\_T3\Mehtap\20180228\_exp28\_logP\_T3-2\18C-01012\_M12\_octanol\_pH-metric high logP.t3r**

Experiment start time: **3/1/2018 3:28:52 PM**  
Analyst: **Pion**  
Instrument ID: **T312060**

## Experiment Log (continued)

[1:18:06] Stirrer speed set to 60  
[1:18:11] pH 7.85 -> 8.05  
[1:18:11] Using cautious pH adjust  
[1:18:11] Dispensed 0.000024 mL of Base (0.5 M KOH)  
[1:18:16] Stepping pH = 7.94  
[1:18:16] Dispensed 0.000024 mL of Base (0.5 M KOH)  
[1:18:21] Stepping pH = 8.03  
[1:18:21] Dispensed 0.000024 mL of Base (0.5 M KOH)  
[1:18:27] Stepping pH = 8.07  
[1:18:42] Stirrer speed set to 0  
[1:19:42] Datapoint id 80 collected  
[1:19:42] Charge balance equation is out by -636.5%  
[1:19:42] Stirrer speed set to 60  
[1:19:47] pH 7.94 -> 8.14  
[1:19:47] Using cautious pH adjust  
[1:19:47] Dispensed 0.000024 mL of Base (0.5 M KOH)  
[1:19:52] Stepping pH = 8.03  
[1:19:52] Dispensed 0.000024 mL of Base (0.5 M KOH)  
[1:19:57] Stepping pH = 8.17  
[1:20:12] Stirrer speed set to 0  
[1:21:12] Datapoint id 81 collected  
[1:21:12] Charge balance equation is out by -388.4%  
[1:21:12] Stirrer speed set to 60  
[1:21:17] pH 8.07 -> 8.27  
[1:21:17] Using cautious pH adjust  
[1:21:17] Dispensed 0.000024 mL of Base (0.5 M KOH)  
[1:21:22] Stepping pH = 8.13  
[1:21:22] Dispensed 0.000024 mL of Base (0.5 M KOH)  
[1:21:28] Stepping pH = 8.23  
[1:21:28] Dispensed 0.000024 mL of Base (0.5 M KOH)  
[1:21:33] Stepping pH = 8.37  
[1:21:48] Stirrer speed set to 0  
[1:22:48] Datapoint id 82 collected  
[1:22:48] Charge balance equation is out by -583.2%  
[1:22:48] Stirrer speed set to 60  
[1:22:53] pH 8.38 -> 8.58  
[1:22:53] Using cautious pH adjust  
[1:22:53] Dispensed 0.000024 mL of Base (0.5 M KOH)  
[1:22:58] Stepping pH = 8.43  
[1:22:58] Dispensed 0.000024 mL of Base (0.5 M KOH)  
[1:23:03] Stepping pH = 8.46  
[1:23:03] Dispensed 0.000024 mL of Base (0.5 M KOH)  
[1:23:08] Stepping pH = 8.54  
[1:23:09] Dispensed 0.000024 mL of Base (0.5 M KOH)  
[1:23:14] Stepping pH = 8.63  
[1:23:29] Stirrer speed set to 0  
[1:23:57] Datapoint id 83 collected  
[1:23:57] Charge balance equation is out by -489.1%  
[1:23:57] Stirrer speed set to 60  
[1:24:02] pH 8.48 -> 8.68  
[1:24:02] Using cautious pH adjust  
[1:24:02] Dispensed 0.000024 mL of Base (0.5 M KOH)  
[1:24:07] Stepping pH = 8.46  
[1:24:07] Dispensed 0.000047 mL of Base (0.5 M KOH)  
[1:24:12] Stepping pH = 8.59  
[1:24:12] Dispensed 0.000024 mL of Base (0.5 M KOH)  
[1:24:17] Stepping pH = 8.68  
[1:24:32] Stirrer speed set to 0  
[1:25:19] Datapoint id 84 collected



Sample name: **M12\_octanol**  
Assay name: **pH-metric high logP**  
Assay ID: **18C-01012**  
Filename: **C:\Sirius\_T3\Mehtap\20180228\_exp28\_logP\_T3-2\18C-01012\_M12\_octanol\_pH-metric high logP.t3r**

Experiment start time: **3/1/2018 3:28:52 PM**  
Analyst: **Pion**  
Instrument ID: **T312060**

## Experiment Log (continued)

[1:25:19] Charge balance equation is out by -472.3%  
[1:25:19] Stirrer speed set to 60  
[1:25:24] pH 8.61 -> 8.81  
[1:25:24] Using cautious pH adjust  
[1:25:24] Dispensed 0.000024 mL of Base (0.5 M KOH)  
[1:25:29] Stepping pH = 8.65  
[1:25:29] Dispensed 0.000024 mL of Base (0.5 M KOH)  
[1:25:34] Stepping pH = 8.72  
[1:25:34] Dispensed 0.000024 mL of Base (0.5 M KOH)  
[1:25:39] Stepping pH = 8.80  
[1:25:54] Stirrer speed set to 0  
[1:26:16] Datapoint id 85 collected  
[1:26:16] Charge balance equation is out by -185.7%  
[1:26:16] Stirrer speed set to 60  
[1:26:21] pH 8.77 -> 8.97  
[1:26:21] Using cautious pH adjust  
[1:26:21] Dispensed 0.000024 mL of Base (0.5 M KOH)  
[1:26:27] Stepping pH = 8.79  
[1:26:27] Dispensed 0.000047 mL of Base (0.5 M KOH)  
[1:26:32] Stepping pH = 8.90  
[1:26:32] Dispensed 0.000024 mL of Base (0.5 M KOH)  
[1:26:37] Stepping pH = 8.95  
[1:26:37] Dispensed 0.000024 mL of Base (0.5 M KOH)  
[1:26:42] Stepping pH = 9.00  
[1:26:57] Stirrer speed set to 0  
[1:27:12] Datapoint id 86 collected  
[1:27:12] Charge balance equation is out by -250.7%  
[1:27:12] Stirrer speed set to 60  
[1:27:17] pH 8.99 -> 9.05  
[1:27:17] Using cautious pH adjust  
[1:27:17] Dispensed 0.000024 mL of Base (0.5 M KOH)  
[1:27:22] Stepping pH = 9.00  
[1:27:37] Stirrer speed set to 0  
[1:27:59] Datapoint id 87 collected  
[1:27:59] Charge balance equation is out by -76.9%  
[1:27:59] Argon flow rate set to 0  
[1:28:03] Titrator arm moved over Titration position
