# Supplementary material for: Octanol-water partition coefficient measurements for the SAMPL6 Blind Prediction Challenge
Source: bioRxiv or medRxiv preprint supplement (doi:10.1101/757393), 2019-12-02
Supplement: Supplementary file [file media-2.zip]

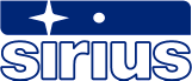

Sample name: **M02\_octanol** Experiment start time: **12/14/2017 9:40:49 PM**  
Assay name: **pH-metric high logP** Analyst: **Dorothy Levorse**  
Assay ID: **17L-14020** Instrument ID: **T311053**  
Filename: **G:\OpenLab\_PFA\_Sirius-T3-1\Sirius-T3-1\Data2017\17L-14020\_M02\_octanol\_pH-metric high logP.t3r**

**pH-metric Result**

logP (XH +) 1.38  
logP (neutral X) 4.32  
RMSD 0.298

**17L-14020 Points 1 to 14**

M02\_octanol concentration factor 0.941  
Carbonate 0.0792 mM  
Acidity error 0.00723 mM

**17L-14020 Points 15 to 31**

M02\_octanol concentration factor 0.825  
Carbonate 0.1960 mM  
Acidity error 0.05972 mM

**17L-14020 Points 32 to 50**

M02\_octanol concentration factor 0.307  
Carbonate 0.2201 mM  
Acidity error 0.61969 mM

**Warnings and errors**

Errors None  
Warnings None

**Sample logD and percent species**

| pH     | M02_octanol<br>logD | M02_octanol<br>M02_octanolH | M02_octanol<br>M02_octanol | M02_octanol<br>M02_octanolH* | M02_octanol<br>M02_octanol* | Comment    |
|--------|---------------------|-----------------------------|----------------------------|------------------------------|-----------------------------|------------|
| 1.000  | 1.41                | 3.71 %                      | 0.00 %                     | 88.98 %                      | 7.31 %                      | Stomach pH |
| 1.200  | 1.43                | 3.56 %                      | 0.00 %                     | 85.33 %                      | 11.11 %                     |            |
| 2.000  | 1.64                | 2.24 %                      | 0.00 %                     | 53.67 %                      | 44.09 %                     |            |
| 3.000  | 2.34                | 0.45 %                      | 0.00 %                     | 10.80 %                      | 88.74 %                     |            |
| 4.000  | 3.26                | 0.05 %                      | 0.00 %                     | 1.20 %                       | 98.74 %                     |            |
| 5.000  | 4.01                | 0.01 %                      | 0.00 %                     | 0.12 %                       | 99.87 %                     | Blood pH   |
| 6.000  | 4.28                | 0.00 %                      | 0.00 %                     | 0.01 %                       | 99.98 %                     |            |
| 6.500  | 4.31                | 0.00 %                      | 0.00 %                     | 0.00 %                       | 99.99 %                     |            |
| 7.000  | 4.32                | 0.00 %                      | 0.00 %                     | 0.00 %                       | 99.99 %                     |            |
| 7.400  | 4.32                | 0.00 %                      | 0.00 %                     | 0.00 %                       | 99.99 %                     |            |
| 8.000  | 4.32                | 0.00 %                      | 0.00 %                     | 0.00 %                       | 100.00 %                    |            |
| 9.000  | 4.32                | 0.00 %                      | 0.00 %                     | 0.00 %                       | 100.00 %                    |            |
| 10.000 | 4.32                | 0.00 %                      | 0.00 %                     | 0.00 %                       | 100.00 %                    |            |
| 11.000 | 4.32                | 0.00 %                      | 0.00 %                     | 0.00 %                       | 100.00 %                    |            |
| 12.000 | 4.32                | 0.00 %                      | 0.00 %                     | 0.00 %                       | 100.00 %                    |            |

Sample name: **M02\_octanol**  
 Assay name: **pH-metric high logP**  
 Assay ID: **17L-14020**  
 Filename: **G:\OpenLab\_PFA\_Sirius-T3-1\Sirius-T3-1\Data2017\17L-14020\_M02\_octanol\_pH-metric high logP.t3r**

Experiment start time: **12/14/2017 9:40:49 PM**  
 Analyst: **Dorothy Leverse**  
 Instrument ID: **T311053**

## Graphs

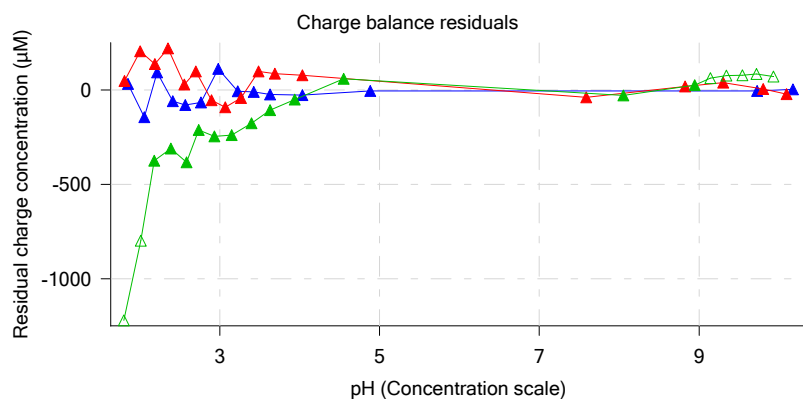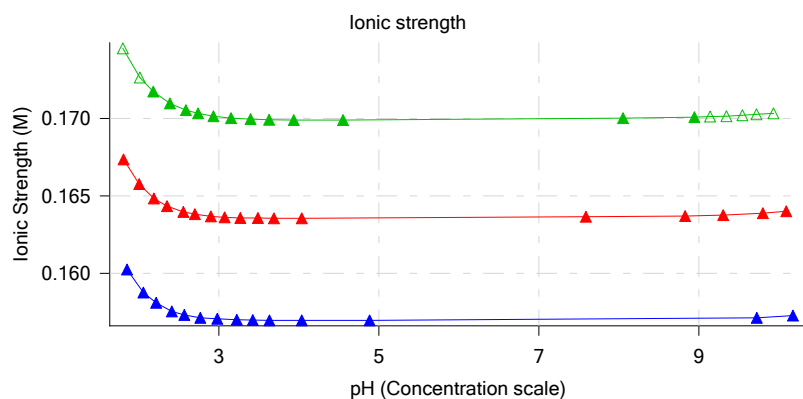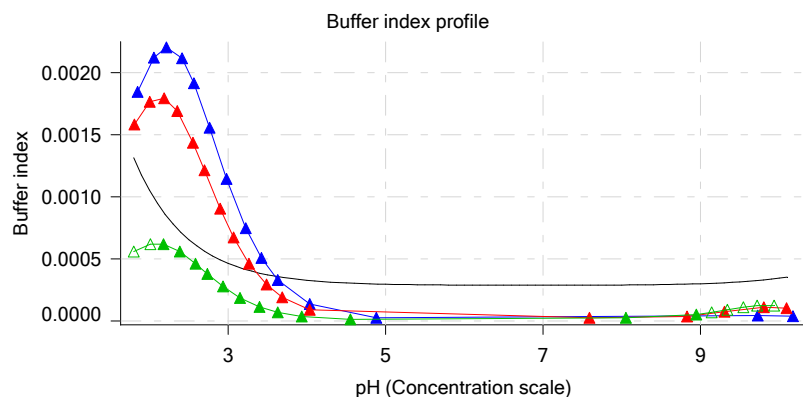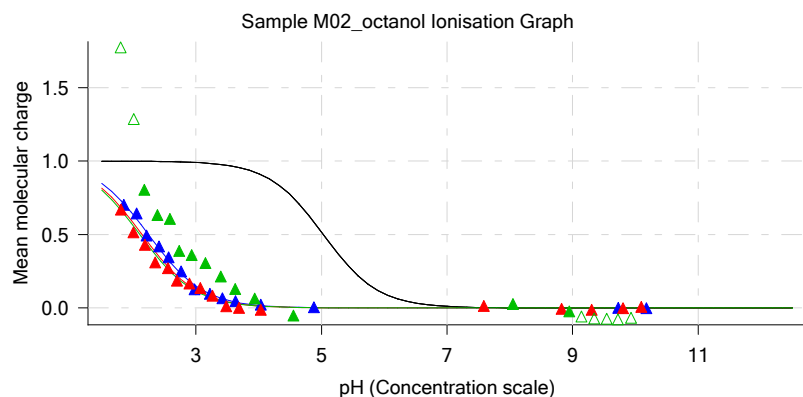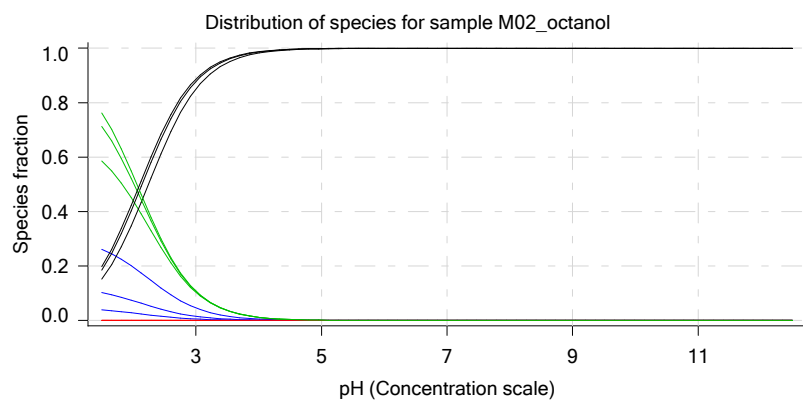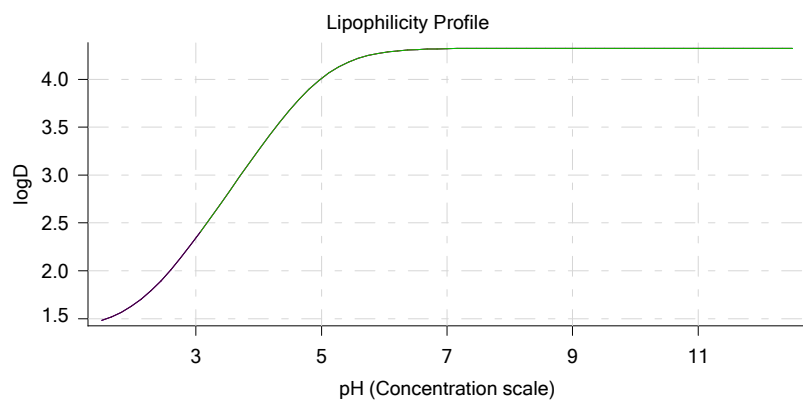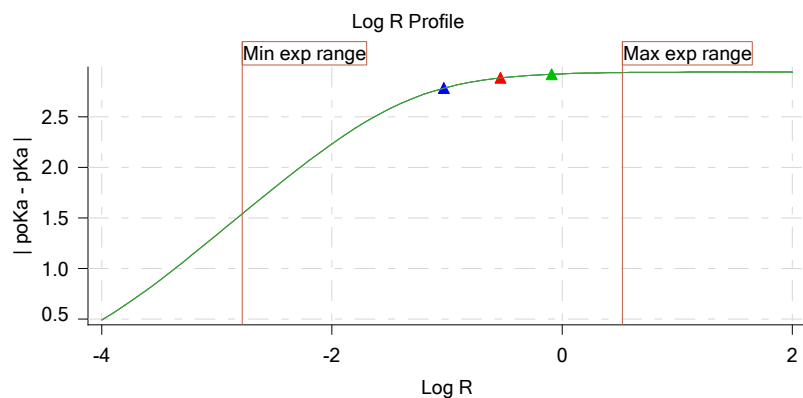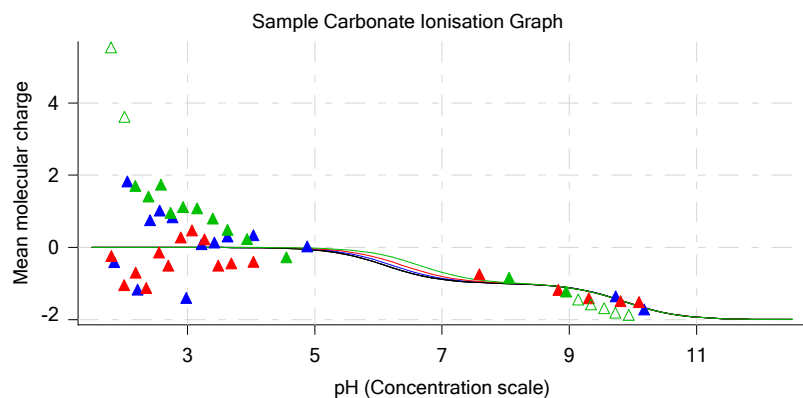

Sample name: **M02\_octanol**  
 Assay name: **pH-metric high logP**  
 Assay ID: **17L-14020**  
 Filename: **G:\OpenLab\_PFA\_Sirius-T3-1\Sirius-T3-1\Data2017\17L-14020\_M02\_octanol\_pH-metric high logP.t3r**

Experiment start time: **12/14/2017 9:40:49 PM**  
 Analyst: **Dorothy Levorse**  
 Instrument ID: **T311053**

## Graphs (continued)

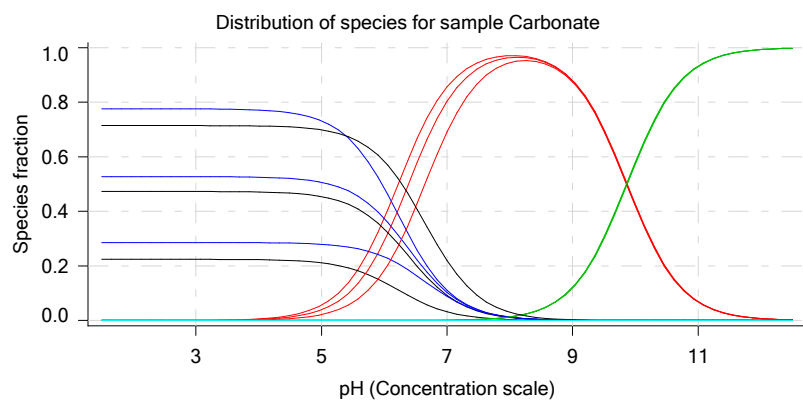

Sample name: **M02\_octanol**  
 Assay name: **pH-metric high logP**  
 Assay ID: **17L-14020**  
 Filename: **G:\OpenLab\_PFA\_Sirius-T3-1\Sirius-T3-1\Data2017\17L-14020\_M02\_octanol\_pH-metric high logP.t3r**

Experiment start time: **12/14/2017 9:40:49 PM**  
 Analyst: **Dorothy Levorse**  
 Instrument ID: **T311053**

## pH-metric high logP Titration 1 of 3 17L-14020 Points 1 to 14

### Overall results

RMSD 0.035  
 Average ionic strength 0.158 M  
 Average temperature 24.8°C  
 Partition ratio 0.0935 : 1  
 Analyte concentration range 3669.1 µM to 3783.1 µM  
 Total points considered 14 of 14

### Warnings and errors

Errors None  
 Warnings None

### Four-Plus parameters

Alpha 0.156 12/14/2017 9:40:49 PM C:\Sirius\_T3\17L-14015\_Blank standardisation.t3r  
 S 0.9945 12/14/2017 9:40:49 PM C:\Sirius\_T3\17L-14015\_Blank standardisation.t3r  
 jH 0.6 12/14/2017 9:40:49 PM C:\Sirius\_T3\17L-14015\_Blank standardisation.t3r  
 jOH -0.7 12/14/2017 9:40:49 PM C:\Sirius\_T3\17L-14015\_Blank standardisation.t3r

### Titrants

0.50 M HCl 1.001830 12/14/2017 9:40:49 PM C:\Sirius\_T3\17L-14015\_Blank standardisation.t3r  
 0.50 M KOH 1.010240 12/14/2017 9:40:49 PM C:\Sirius\_T3\17L-11009\_KHP\_Base standardisation using KHP.t3r

### Sample

M02\_octanol concentration factor 0.941  
 Base pKa 1 5.03  
 logP (XH +) -0.57  
 logP (neutral X) 3.81

### Sample graphs

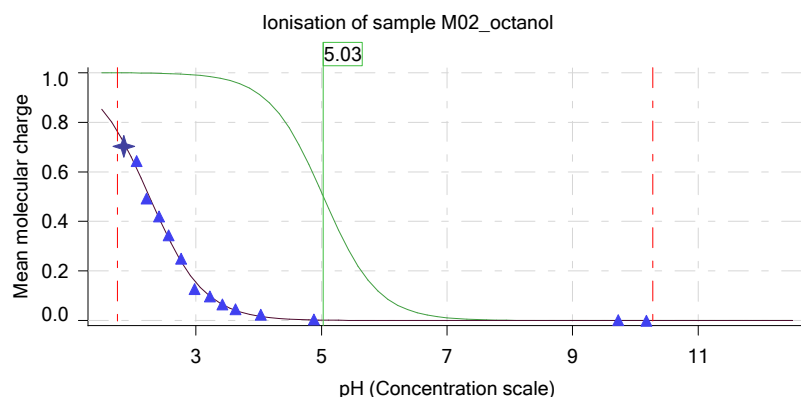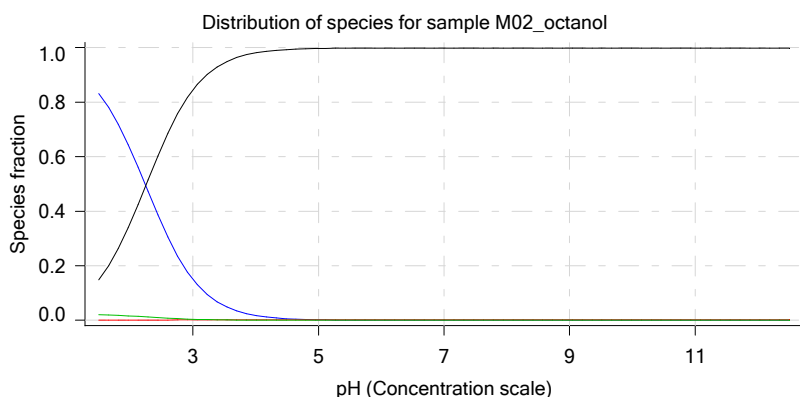

Sample name: **M02\_octanol**  
 Assay name: **pH-metric high logP**  
 Assay ID: **17L-14020**  
 Filename: **G:\OpenLab\_PFA\_Sirius-T3-1\Sirius-T3-1\Data2017\17L-14020\_M02\_octanol\_pH-metric high logP.t3r**

Experiment start time: **12/14/2017 9:40:49 PM**  
 Analyst: **Dorothy Levorse**  
 Instrument ID: **T311053**

## Sample graphs (continued)

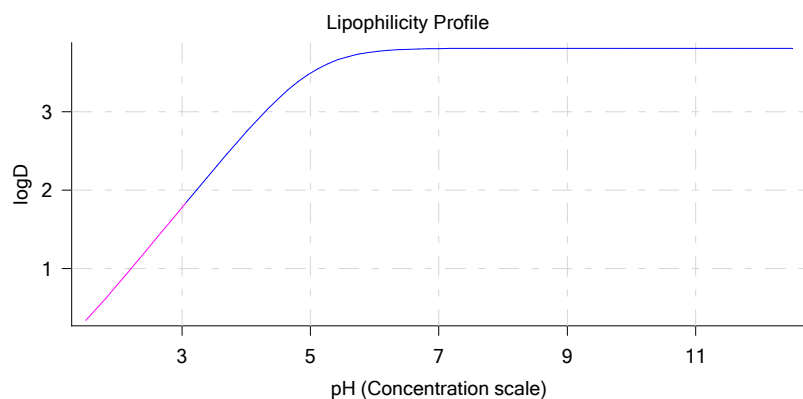

## Sample logD and percent species

| pH     | M02_octanol<br>logD | M02_octanol<br>M02_octanolH | M02_octanol<br>M02_octanolH | M02_octanol<br>M02_octanolH* | M02_octanol<br>M02_octanol* | Comment    |
|--------|---------------------|-----------------------------|-----------------------------|------------------------------|-----------------------------|------------|
| 1.000  | -0.06               | 92.45 %                     | 0.01 %                      | 2.33 %                       | 5.21 %                      | Stomach pH |
| 1.200  | 0.09                | 89.71 %                     | 0.01 %                      | 2.26 %                       | 8.02 %                      |            |
| 2.000  | 0.80                | 62.89 %                     | 0.06 %                      | 1.58 %                       | 35.46 %                     |            |
| 3.000  | 1.78                | 14.99 %                     | 0.14 %                      | 0.38 %                       | 84.50 %                     |            |
| 4.000  | 2.74                | 1.74 %                      | 0.16 %                      | 0.04 %                       | 98.05 %                     |            |
| 5.000  | 3.49                | 0.18 %                      | 0.16 %                      | 0.00 %                       | 99.65 %                     | Blood pH   |
| 6.000  | 3.77                | 0.02 %                      | 0.17 %                      | 0.00 %                       | 99.82 %                     |            |
| 6.500  | 3.80                | 0.01 %                      | 0.17 %                      | 0.00 %                       | 99.83 %                     |            |
| 7.000  | 3.81                | 0.00 %                      | 0.17 %                      | 0.00 %                       | 99.83 %                     |            |
| 7.400  | 3.81                | 0.00 %                      | 0.17 %                      | 0.00 %                       | 99.83 %                     |            |
| 8.000  | 3.81                | 0.00 %                      | 0.17 %                      | 0.00 %                       | 99.83 %                     |            |
| 9.000  | 3.81                | 0.00 %                      | 0.17 %                      | 0.00 %                       | 99.83 %                     |            |
| 10.000 | 3.81                | 0.00 %                      | 0.17 %                      | 0.00 %                       | 99.83 %                     |            |
| 11.000 | 3.81                | 0.00 %                      | 0.17 %                      | 0.00 %                       | 99.83 %                     |            |
| 12.000 | 3.81                | 0.00 %                      | 0.17 %                      | 0.00 %                       | 99.83 %                     |            |

## Carbonate and acidity

 Carbonate 0.079 mM  
 Acidity error 0.007 mM

## Other graphs

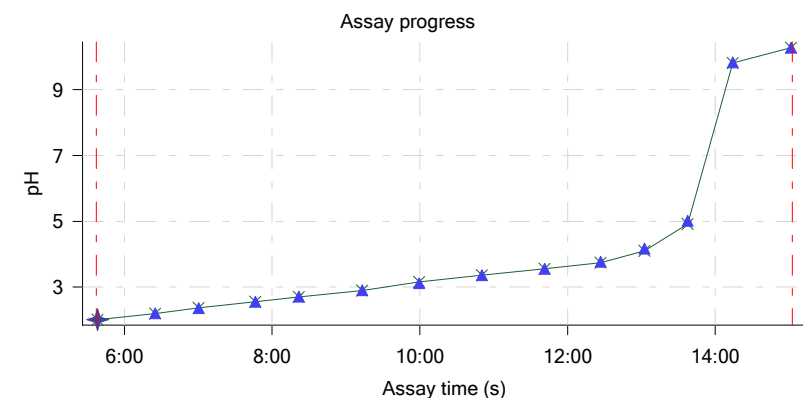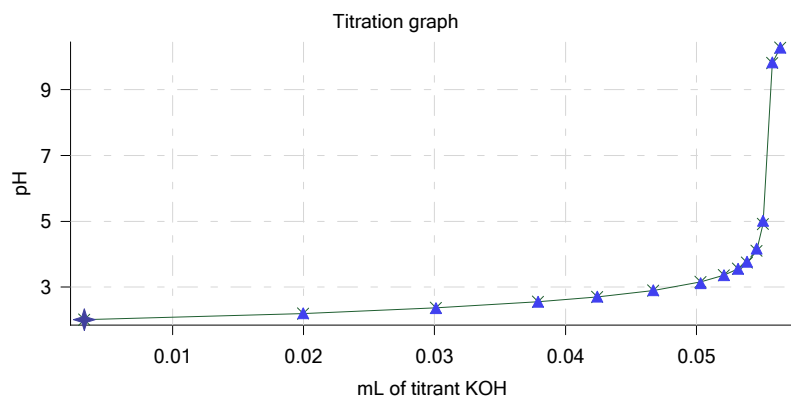

Sample name: **M02\_octanol**  
 Assay name: **pH-metric high logP**  
 Assay ID: **17L-14020**  
 Filename: **G:\OpenLab\_PFA\_Sirius-T3-1\Sirius-T3-1\Data2017\17L-14020\_M02\_octanol\_pH-metric high logP.t3r**

Experiment start time: **12/14/2017 9:40:49 PM**  
 Analyst: **Dorothy Levorse**  
 Instrument ID: **T311053**

## Other graphs (continued)

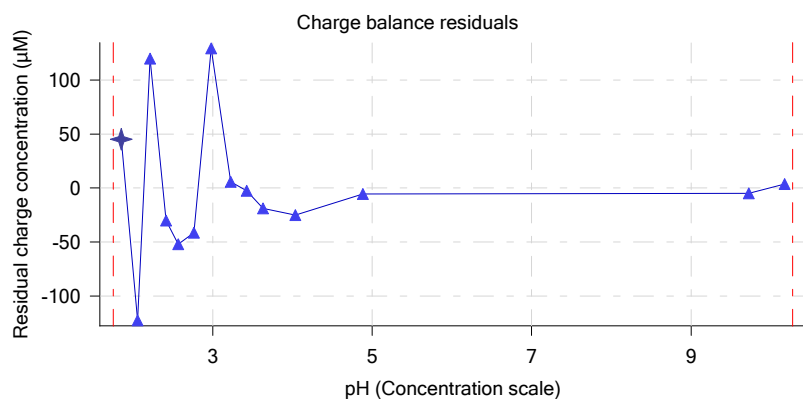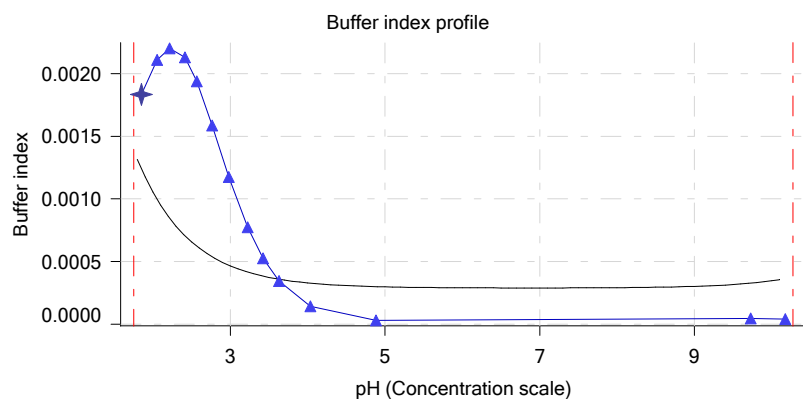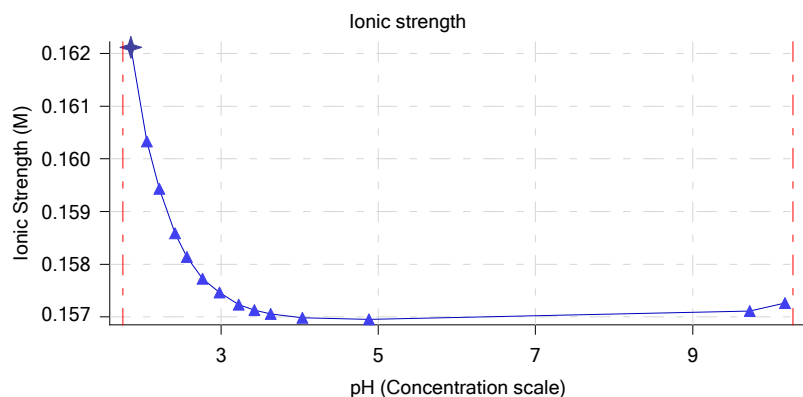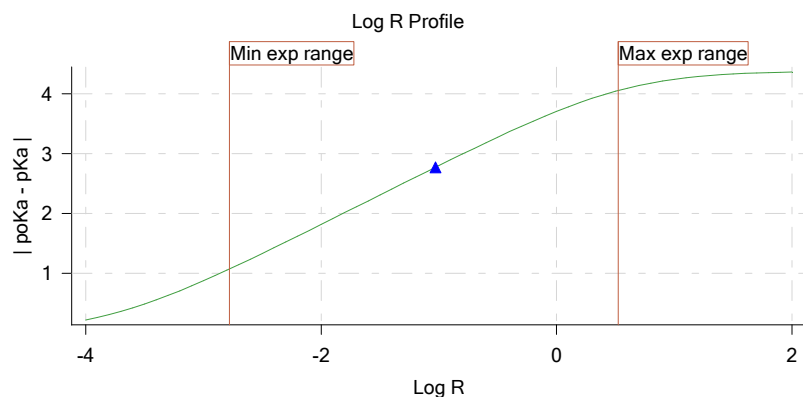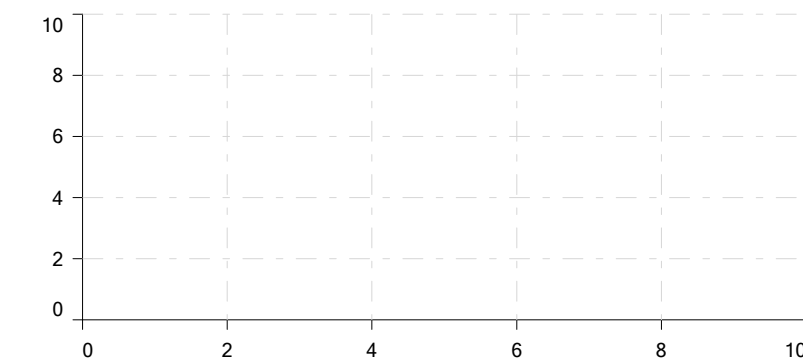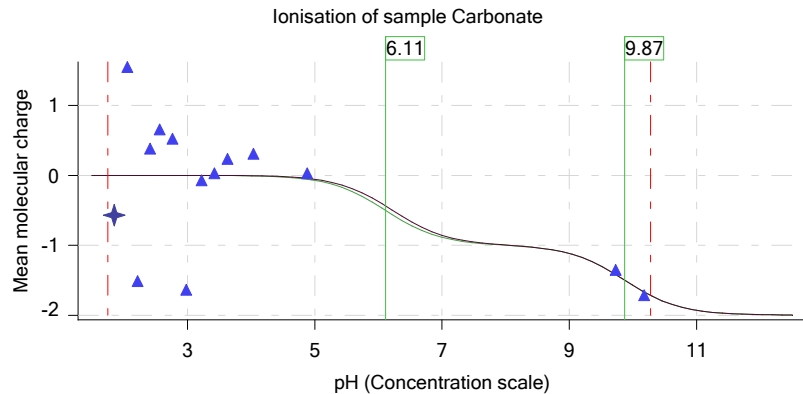

Sample name: **M02\_octanol**  
 Assay name: **pH-metric high logP**  
 Assay ID: **17L-14020**  
 Filename: **G:\OpenLab\_PFA\_Sirius-T3-1\Sirius-T3-1\Data2017\17L-14020\_M02\_octanol\_pH-metric high logP.t3r**

Experiment start time: **12/14/2017 9:40:49 PM**  
 Analyst: **Dorothy Levorse**  
 Instrument ID: **T311053**

## pH-metric high logP Titration 2 of 3 17L-14020 Points 15 to 31

### Overall results

RMSD 0.353  
 Average ionic strength 0.165 M  
 Average temperature 24.9°C  
 Partition ratio 0.2903 : 1  
 Analyte concentration range 2895.7 µM to 2976.2 µM  
 Total points considered 17 of 17

### Warnings and errors

Errors None  
 Warnings None

### Four-Plus parameters

Alpha 0.156 12/14/2017 9:40:49 PM C:\Sirius\_T3\17L-14015\_Blank standardisation.t3r  
 S 0.9945 12/14/2017 9:40:49 PM C:\Sirius\_T3\17L-14015\_Blank standardisation.t3r  
 jH 0.6 12/14/2017 9:40:49 PM C:\Sirius\_T3\17L-14015\_Blank standardisation.t3r  
 jOH -0.7 12/14/2017 9:40:49 PM C:\Sirius\_T3\17L-14015\_Blank standardisation.t3r

### Titrants

0.50 M HCl 1.001830 12/14/2017 9:40:49 PM C:\Sirius\_T3\17L-14015\_Blank standardisation.t3r  
 0.50 M KOH 1.010240 12/14/2017 9:40:49 PM C:\Sirius\_T3\17L-11009\_KHP\_Base standardisation using KHP.t3r

### Sample

M02\_octanol concentration factor 0.825  
 Base pKa 1 5.03  
 logP (XH +) -0.57  
 logP (neutral X) 3.52

### Sample graphs

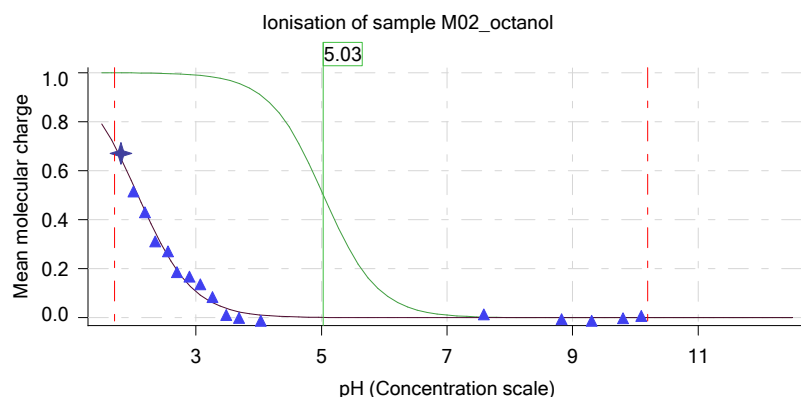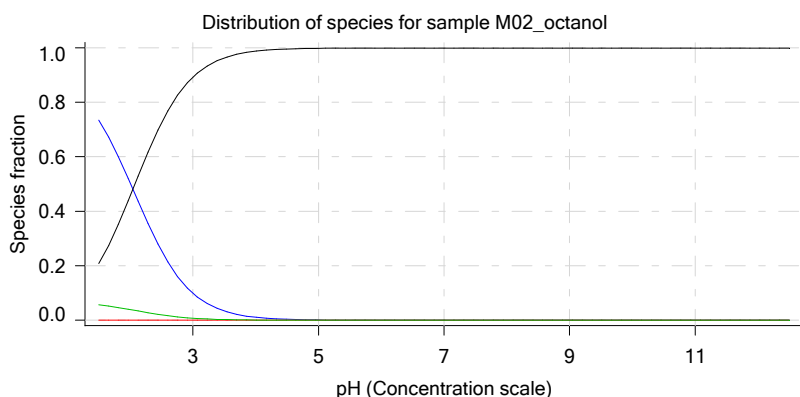

Sample name: **M02\_octanol**  
 Assay name: **pH-metric high logP**  
 Assay ID: **17L-14020**  
 Filename: **G:\OpenLab\_PFA\_Sirius-T3-1\Sirius-T3-1\Data2017\17L-14020\_M02\_octanol\_pH-metric high logP.t3r**

Experiment start time: **12/14/2017 9:40:49 PM**  
 Analyst: **Dorothy Levorse**  
 Instrument ID: **T311053**

## Sample graphs (continued)

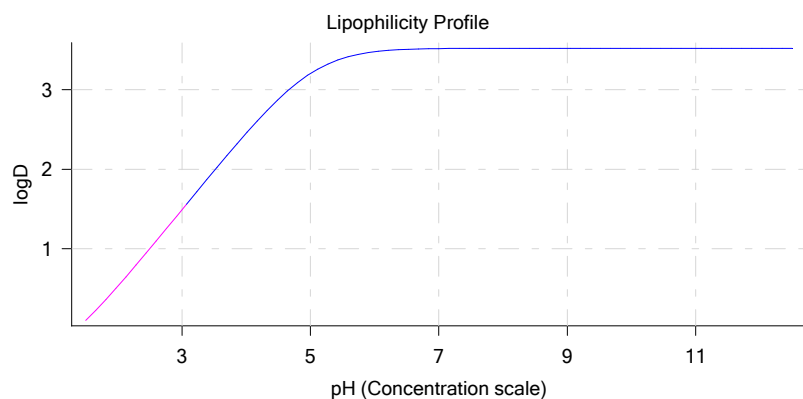

## Sample logD and percent species

| pH     | M02_octanol<br>logD | M02_octanol<br>M02_octanolH | M02_octanol<br>M02_octanolH | M02_octanol<br>M02_octanolH* | M02_octanol<br>M02_octanol* | Comment    |
|--------|---------------------|-----------------------------|-----------------------------|------------------------------|-----------------------------|------------|
| 1.000  | -0.24               | 85.58 %                     | 0.01 %                      | 6.69 %                       | 7.72 %                      | Stomach pH |
| 1.200  | -0.12               | 81.88 %                     | 0.01 %                      | 6.40 %                       | 11.71 %                     |            |
| 2.000  | 0.53                | 50.46 %                     | 0.05 %                      | 3.94 %                       | 45.55 %                     |            |
| 3.000  | 1.49                | 9.89 %                      | 0.09 %                      | 0.77 %                       | 89.25 %                     |            |
| 4.000  | 2.45                | 1.09 %                      | 0.10 %                      | 0.09 %                       | 98.72 %                     |            |
| 5.000  | 3.21                | 0.11 %                      | 0.10 %                      | 0.01 %                       | 99.78 %                     | Blood pH   |
| 6.000  | 3.48                | 0.01 %                      | 0.10 %                      | 0.00 %                       | 99.88 %                     |            |
| 6.500  | 3.51                | 0.00 %                      | 0.10 %                      | 0.00 %                       | 99.89 %                     |            |
| 7.000  | 3.52                | 0.00 %                      | 0.10 %                      | 0.00 %                       | 99.90 %                     |            |
| 7.400  | 3.52                | 0.00 %                      | 0.10 %                      | 0.00 %                       | 99.90 %                     |            |
| 8.000  | 3.52                | 0.00 %                      | 0.10 %                      | 0.00 %                       | 99.90 %                     |            |
| 9.000  | 3.52                | 0.00 %                      | 0.10 %                      | 0.00 %                       | 99.90 %                     |            |
| 10.000 | 3.52                | 0.00 %                      | 0.10 %                      | 0.00 %                       | 99.90 %                     |            |
| 11.000 | 3.52                | 0.00 %                      | 0.10 %                      | 0.00 %                       | 99.90 %                     |            |
| 12.000 | 3.52                | 0.00 %                      | 0.10 %                      | 0.00 %                       | 99.90 %                     |            |

## Carbonate and acidity

Carbonate 0.196 mM  
 Acidity error 0.060 mM

## Other graphs

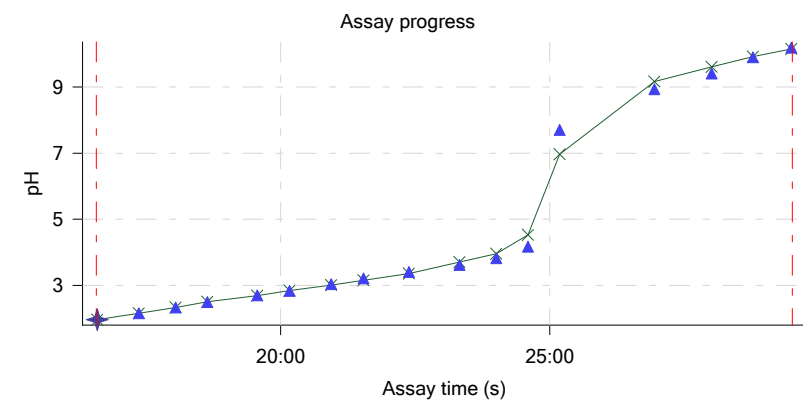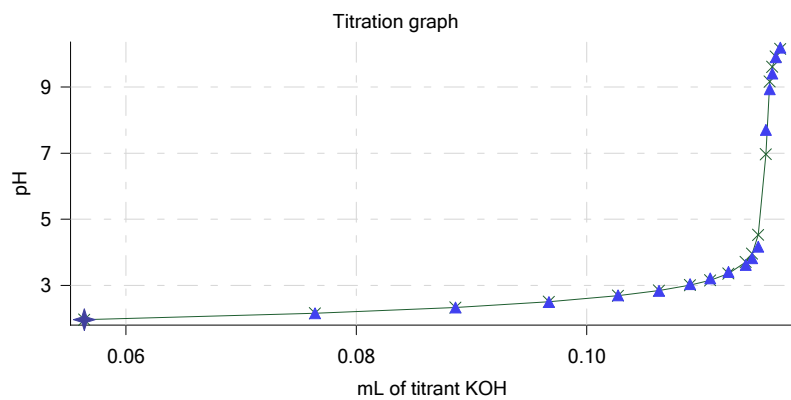



Sample name: **M02\_octanol**  
 Assay name: **pH-metric high logP**  
 Assay ID: **17L-14020**  
 Filename: **G:\OpenLab\_PFA\_Sirius-T3-1\Sirius-T3-1\Data2017\17L-14020\_M02\_octanol\_pH-metric high logP.t3r**

Experiment start time: **12/14/2017 9:40:49 PM**  
 Analyst: **Dorothy Levorse**  
 Instrument ID: **T311053**

## Other graphs (continued)

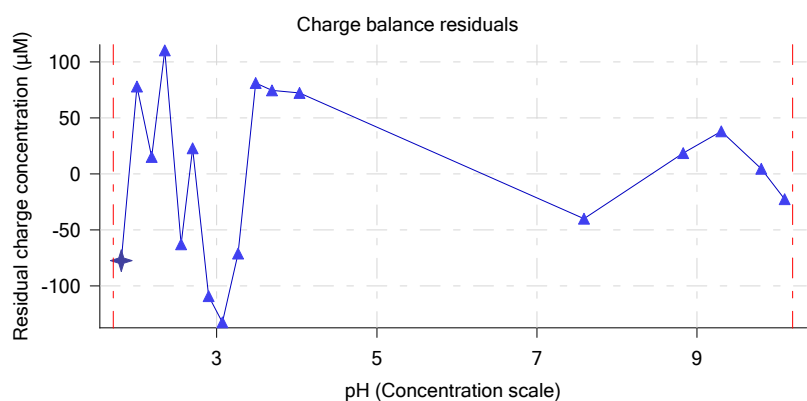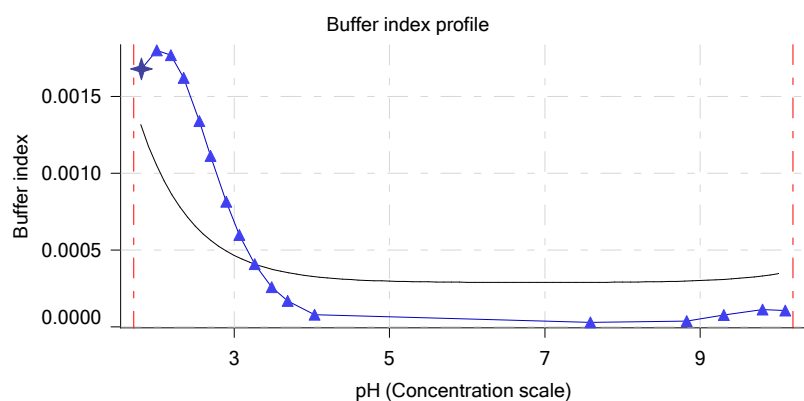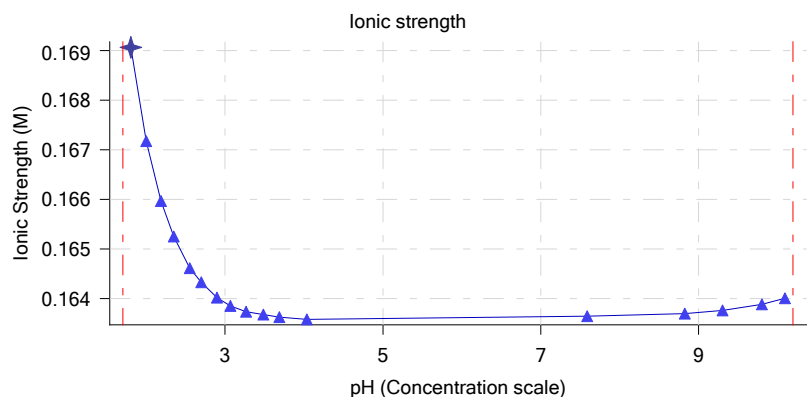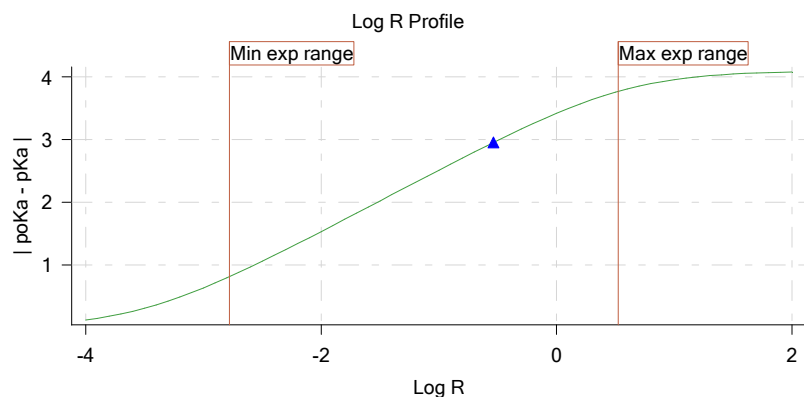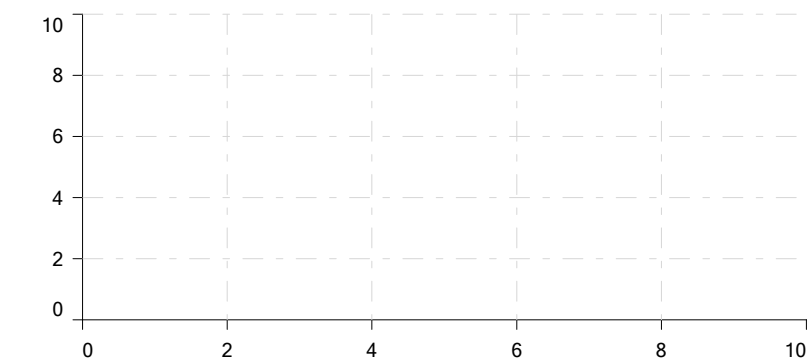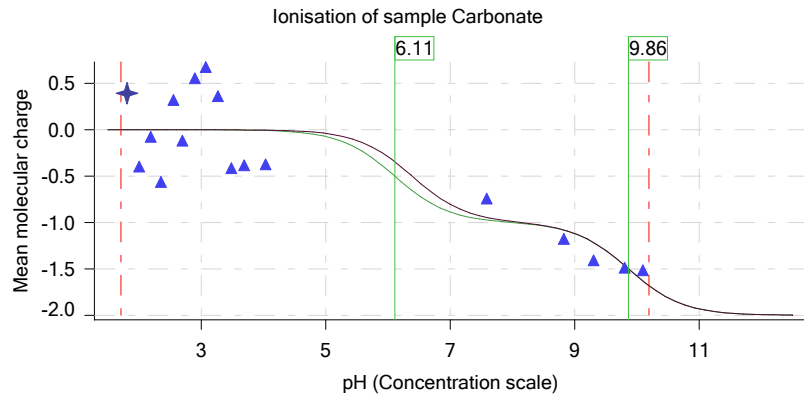

Sample name: **M02\_octanol**  
 Assay name: **pH-metric high logP**  
 Assay ID: **17L-14020**  
 Filename: **G:\OpenLab\_PFA\_Sirius-T3-1\Sirius-T3-1\Data2017\17L-14020\_M02\_octanol\_pH-metric high logP.t3r**

Experiment start time: **12/14/2017 9:40:49 PM**  
 Analyst: **Dorothy Levorse**  
 Instrument ID: **T311053**

pH-metric high logP Titration 3 of 3 17L-14020 Points 32 to 50

## Overall results

RMSD 0.347  
 Average ionic strength 0.170 M  
 Average temperature 25.0°C  
 Partition ratio 0.8090 : 1  
 Analyte concentration range 1923.2 µM to 1961.3 µM  
 Total points considered 12 of 19

## Warnings and errors

Errors None  
 Warnings Sample concentration factor out of range

## Four-Plus parameters

Alpha 0.156 12/14/2017 9:40:49 PM C:\Sirius\_T3\17L-14015\_Blank standardisation.t3r  
 S 0.9945 12/14/2017 9:40:49 PM C:\Sirius\_T3\17L-14015\_Blank standardisation.t3r  
 jH 0.6 12/14/2017 9:40:49 PM C:\Sirius\_T3\17L-14015\_Blank standardisation.t3r  
 jOH -0.7 12/14/2017 9:40:49 PM C:\Sirius\_T3\17L-14015\_Blank standardisation.t3r

## Titrants

0.50 M HCl 1.001830 12/14/2017 9:40:49 PM C:\Sirius\_T3\17L-14015\_Blank standardisation.t3r  
 0.50 M KOH 1.010240 12/14/2017 9:40:49 PM C:\Sirius\_T3\17L-11009\_KHP\_Base standardisation using KHP.t3r

## Sample

M02\_octanol concentration factor 0.307  
 Base pKa 1 5.03  
 logP (XH +) -0.57  
 logP (neutral X) 2.51

## Sample graphs

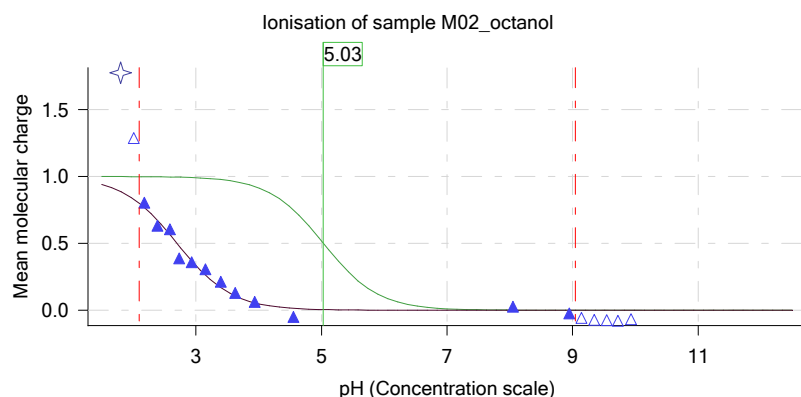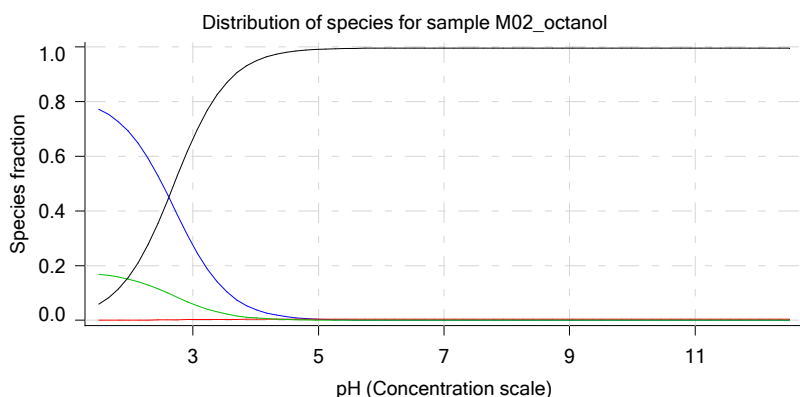

Sample name: **M02\_octanol**  
 Assay name: **pH-metric high logP**  
 Assay ID: **17L-14020**  
 Filename: **G:\OpenLab\_PFA\_Sirius-T3-1\Sirius-T3-1\Data2017\17L-14020\_M02\_octanol\_pH-metric high logP.t3r**

Experiment start time: **12/14/2017 9:40:49 PM**  
 Analyst: **Dorothy Levorse**  
 Instrument ID: **T311053**

## Sample graphs (continued)

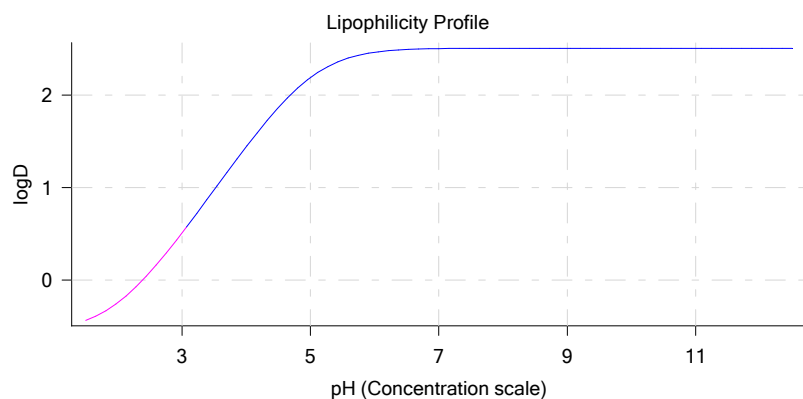

## Sample logD and percent species

| pH     | M02_octanol<br>logD | M02_octanol<br>M02_octanolH | M02_octanol<br>M02_octanolH | M02_octanol<br>M02_octanolH* | M02_octanol<br>M02_octanol* | Comment    |
|--------|---------------------|-----------------------------|-----------------------------|------------------------------|-----------------------------|------------|
| 1.000  | -0.52               | 80.51 %                     | 0.01 %                      | 17.53 %                      | 1.96 %                      | Stomach pH |
| 1.200  | -0.50               | 79.59 %                     | 0.01 %                      | 17.33 %                      | 3.07 %                      |            |
| 2.000  | -0.24               | 68.41 %                     | 0.06 %                      | 14.90 %                      | 16.63 %                     |            |
| 3.000  | 0.51                | 27.34 %                     | 0.26 %                      | 5.95 %                       | 66.45 %                     |            |
| 4.000  | 1.44                | 3.90 %                      | 0.36 %                      | 0.85 %                       | 94.88 %                     |            |
| 5.000  | 2.19                | 0.41 %                      | 0.38 %                      | 0.09 %                       | 99.12 %                     | Blood pH   |
| 6.000  | 2.46                | 0.04 %                      | 0.38 %                      | 0.01 %                       | 99.57 %                     |            |
| 6.500  | 2.49                | 0.01 %                      | 0.38 %                      | 0.00 %                       | 99.60 %                     |            |
| 7.000  | 2.50                | 0.00 %                      | 0.38 %                      | 0.00 %                       | 99.61 %                     |            |
| 7.400  | 2.51                | 0.00 %                      | 0.38 %                      | 0.00 %                       | 99.62 %                     |            |
| 8.000  | 2.51                | 0.00 %                      | 0.38 %                      | 0.00 %                       | 99.62 %                     |            |
| 9.000  | 2.51                | 0.00 %                      | 0.38 %                      | 0.00 %                       | 99.62 %                     |            |
| 10.000 | 2.51                | 0.00 %                      | 0.38 %                      | 0.00 %                       | 99.62 %                     |            |
| 11.000 | 2.51                | 0.00 %                      | 0.38 %                      | 0.00 %                       | 99.62 %                     |            |
| 12.000 | 2.51                | 0.00 %                      | 0.38 %                      | 0.00 %                       | 99.62 %                     |            |

## Carbonate and acidity

 Carbonate 0.220 mM  
 Acidity error 0.620 mM

## Other graphs

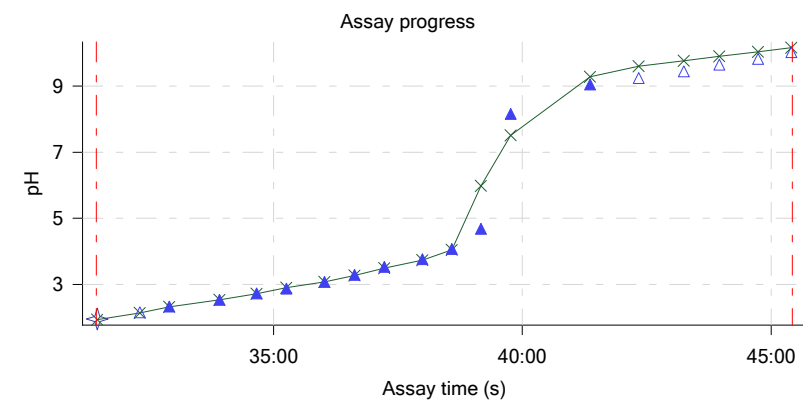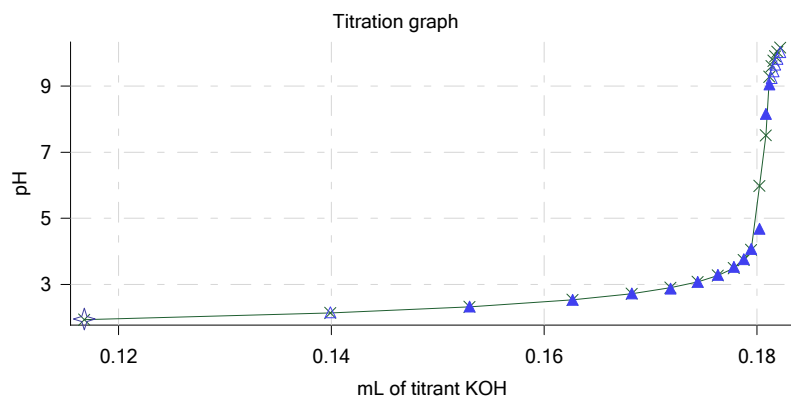

Sample name: **M02\_octanol**  
 Assay name: **pH-metric high logP**  
 Assay ID: **17L-14020**  
 Filename: **G:\OpenLab\_PFA\_Sirius-T3-1\Sirius-T3-1\Data2017\17L-14020\_M02\_octanol\_pH-metric high logP.t3r**

Experiment start time: **12/14/2017 9:40:49 PM**  
 Analyst: **Dorothy Levorse**  
 Instrument ID: **T311053**

## Other graphs (continued)

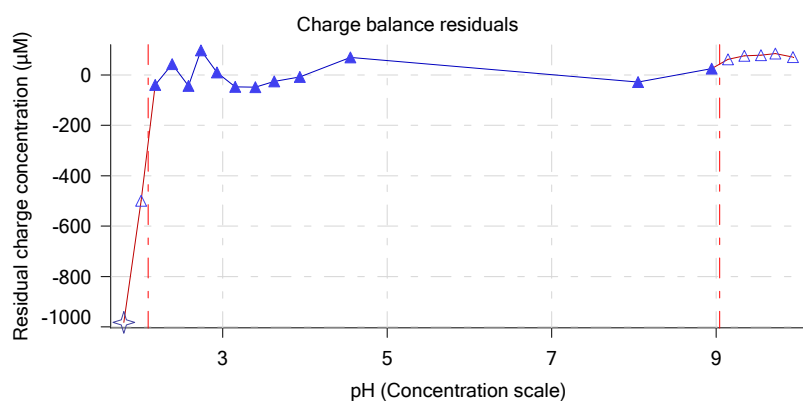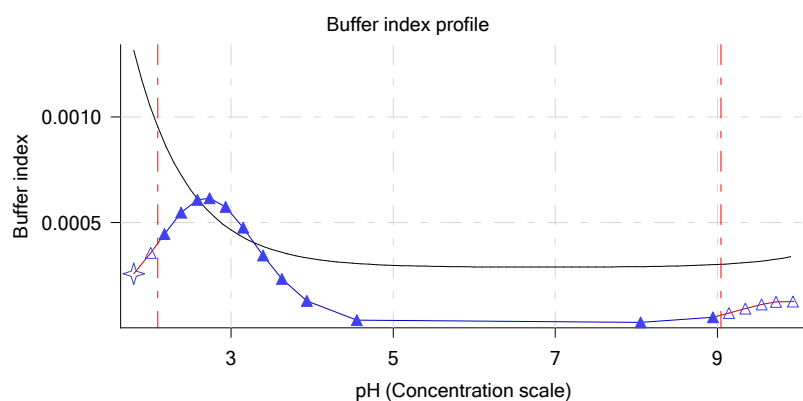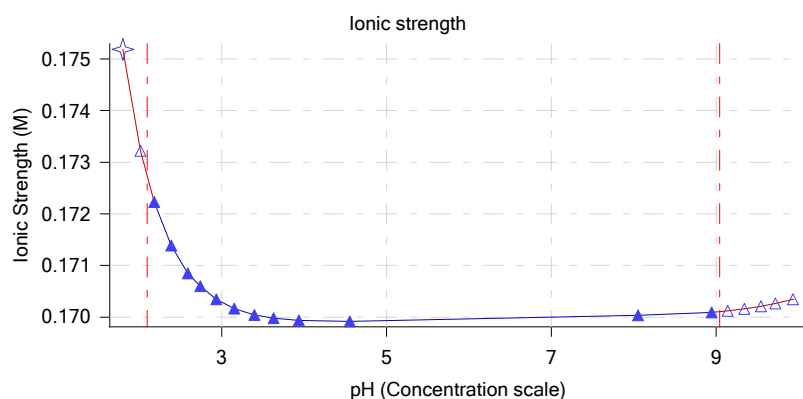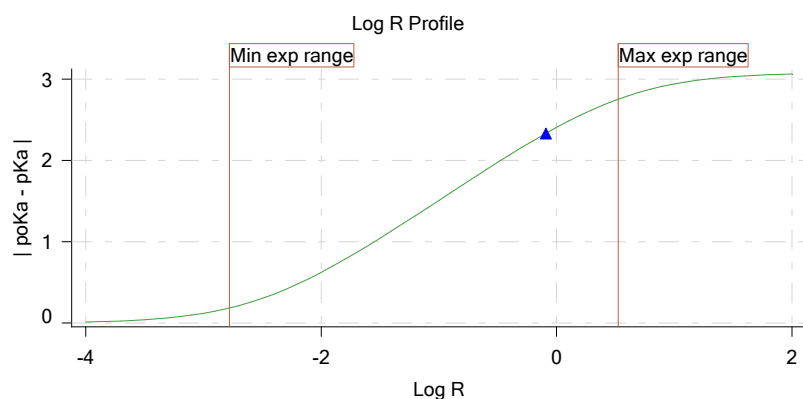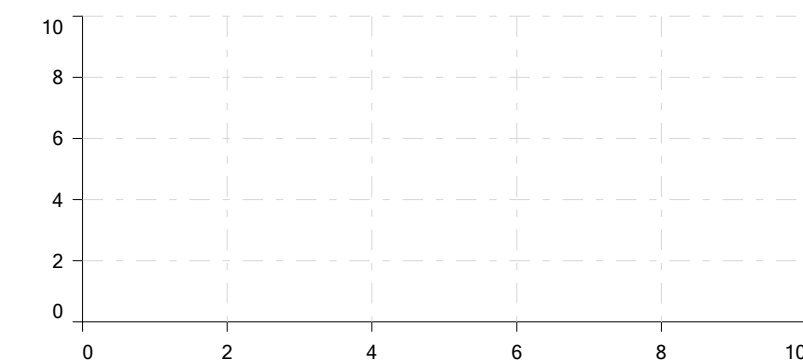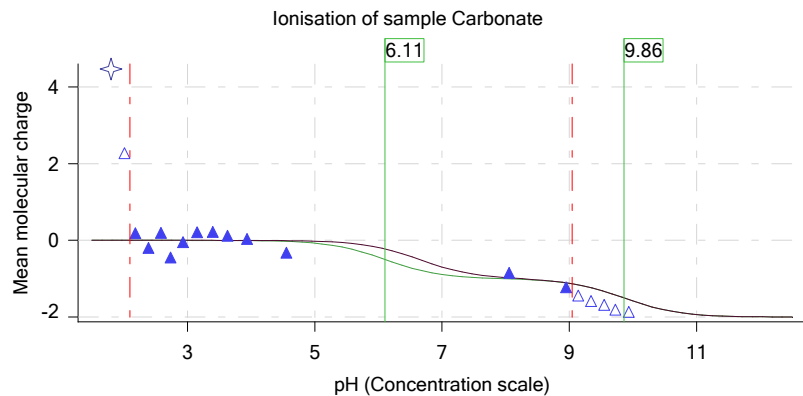

Sample name: **M02\_octanol**  
 Assay name: **pH-metric high logP**  
 Assay ID: **17L-14020**  
 Filename: **G:\OpenLab\_PFA\_Sirius-T3-1\Sirius-T3-1\Data2017\17L-14020\_M02\_octanol\_pH-metric high logP.t3r**

Experiment start time: **12/14/2017 9:40:49 PM**  
 Analyst: **Dorothy Levorse**  
 Instrument ID: **T311053**

## Assay Model

| Settings                          | Value        | Date/Time changed     | Imported from      |
|-----------------------------------|--------------|-----------------------|--------------------|
| Sample name                       | M02_octanol  | 12/6/2017 5:20:03 PM  | User entered value |
| Sample by                         | Weight       |                       | Default value      |
| Sample weight                     | 0.001870 g   | 12/14/2017 4:31:54 PM | User entered value |
| Formula weight                    | 289.26 g/mol | 12/6/2017 5:20:03 PM  | User entered value |
| Solubility                        | Unknown      |                       | Default value      |
| Molecular weight                  | 289.26       | 12/6/2017 5:20:03 PM  | User entered value |
| Individual pKa ionic environments | No           |                       | Default value      |
| Number of pKas                    | 1            | 12/6/2017 5:20:03 PM  | User entered value |
| Sample is a                       | Base         | 12/6/2017 5:20:03 PM  | User entered value |
| pKa 1                             | 5.03         | 12/6/2017 5:20:03 PM  | User entered value |
| logp (XH +)                       | -0.57        | 12/14/2017 3:31:39 PM | User entered value |
| logP (neutral X)                  | 0.94         | 12/14/2017 3:31:32 PM | User entered value |

## Events

| Time    | Event             | Water      | Acid       | Base       | Octanol    | pH     | dpH/dt   | pH R-squared | pH SD   | dpH/dt time         |
|---------|-------------------|------------|------------|------------|------------|--------|----------|--------------|---------|---------------------|
| 2:38.7  | Initial pH = 6.57 |            |            |            |            |        |          |              |         |                     |
| 5:38.2  | Data point 1      | 1.50000 mL | 0.05560 mL | 0.00327 mL | 0.15000 mL | 2.007  | 0.00139  | 0.03368      | 0.00037 | 10.5 s              |
| 6:24.9  | Data point 2      | 1.50000 mL | 0.05560 mL | 0.01997 mL | 0.15000 mL | 2.206  | -0.00747 | 0.39684      | 0.00059 | 10.0 s              |
| 7:00.4  | Data point 3      | 1.50000 mL | 0.05560 mL | 0.03010 mL | 0.15000 mL | 2.363  | -0.00559 | 0.19734      | 0.00062 | 10.0 s              |
| 7:46.3  | Data point 4      | 1.50000 mL | 0.05560 mL | 0.03791 mL | 0.15000 mL | 2.558  | -0.01487 | 0.86800      | 0.00079 | 10.0 s              |
| 8:21.8  | Data point 5      | 1.50000 mL | 0.05560 mL | 0.04243 mL | 0.15000 mL | 2.710  | -0.00425 | 0.44243      | 0.00032 | 10.5 s              |
| 9:13.3  | Data point 6      | 1.50000 mL | 0.05560 mL | 0.04671 mL | 0.15000 mL | 2.907  | -0.00837 | 0.81909      | 0.00046 | 10.5 s              |
| 9:59.6  | Data point 7      | 1.50000 mL | 0.05560 mL | 0.05031 mL | 0.15000 mL | 3.120  | -0.01056 | 0.38594      | 0.00084 | 10.0 s              |
| 10:50.5 | Data point 8      | 1.50000 mL | 0.05560 mL | 0.05209 mL | 0.15000 mL | 3.363  | -0.01094 | 0.53189      | 0.00074 | 10.0 s              |
| 11:41.4 | Data point 9      | 1.50000 mL | 0.05560 mL | 0.05318 mL | 0.15000 mL | 3.562  | -0.00971 | 0.40417      | 0.00075 | 10.0 s              |
| 12:27.0 | Data point 10     | 1.50000 mL | 0.05560 mL | 0.05386 mL | 0.15000 mL | 3.767  | -0.01049 | 0.64757      | 0.00064 | 10.0 s              |
| 13:02.4 | Data point 11     | 1.50000 mL | 0.05560 mL | 0.05459 mL | 0.15000 mL | 4.170  | -0.00778 | 0.67581      | 0.00047 | 10.0 s              |
| 13:37.7 | Data point 12     | 1.50000 mL | 0.05560 mL | 0.05508 mL | 0.15000 mL | 5.011  | 0.00369  | 0.07856      | 0.00065 | 11.0 s              |
| 14:14.1 | Data point 13     | 1.50000 mL | 0.05560 mL | 0.05579 mL | 0.15000 mL | 9.827  | -0.01899 | 0.90855      | 0.00098 | 17.0 s              |
| 15:01.6 | Data point 14     | 1.50000 mL | 0.05560 mL | 0.05640 mL | 0.15000 mL | 10.274 | -0.01908 | 0.91794      | 0.00098 | 17.0 s              |
| 16:35.5 | Data point 15     | 1.50000 mL | 0.11580 mL | 0.05640 mL | 0.50000 mL | 1.964  | -0.00642 | 0.19348      | 0.00072 | 10.0 s              |
| 17:21.8 | Data point 16     | 1.50000 mL | 0.11580 mL | 0.07641 mL | 0.50000 mL | 2.155  | -0.01440 | 0.57008      | 0.00094 | 15.5 s              |
| 18:03.0 | Data point 17     | 1.50000 mL | 0.11580 mL | 0.08862 mL | 0.50000 mL | 2.336  | -0.01761 | 0.86346      | 0.00094 | 10.0 s              |
| 18:38.5 | Data point 18     | 1.50000 mL | 0.11580 mL | 0.09671 mL | 0.50000 mL | 2.499  | -0.01747 | 0.85915      | 0.00093 | 14.5 s              |
| 19:34.1 | Data point 19     | 1.50000 mL | 0.11580 mL | 0.10271 mL | 0.50000 mL | 2.699  | -0.01738 | 0.83571      | 0.00094 | 10.5 s              |
| 20:10.1 | Data point 20     | 1.50000 mL | 0.11580 mL | 0.10626 mL | 0.50000 mL | 2.841  | -0.01842 | 0.94159      | 0.00094 | 10.5 s              |
| 20:56.5 | Data point 21     | 1.50000 mL | 0.11580 mL | 0.10896 mL | 0.50000 mL | 3.039  | -0.00529 | 0.32126      | 0.00046 | 10.5 s              |
| 21:32.5 | Data point 22     | 1.50000 mL | 0.11580 mL | 0.11070 mL | 0.50000 mL | 3.210  | -0.01298 | 0.72113      | 0.00075 | 10.0 s              |
| 22:23.3 | Data point 23     | 1.50000 mL | 0.11580 mL | 0.11230 mL | 0.50000 mL | 3.404  | -0.01202 | 0.61736      | 0.00075 | 10.0 s              |
| 23:19.3 | Data point 24     | 1.50000 mL | 0.11580 mL | 0.11381 mL | 0.50000 mL | 3.623  | -0.00105 | 0.02529      | 0.00033 | 10.5 s              |
| 24:00.4 | Data point 25     | 1.50000 mL | 0.11580 mL | 0.11435 mL | 0.50000 mL | 3.825  | -0.01396 | 0.59332      | 0.00089 | 10.0 s              |
| 24:35.7 | Data point 26     | 1.50000 mL | 0.11580 mL | 0.11486 mL | 0.50000 mL | 4.169  | -0.00892 | 0.71187      | 0.00052 | 10.0 s              |
| 25:11.0 | Data point 27     | 1.50000 mL | 0.11580 mL | 0.11555 mL | 0.50000 mL | 7.702  | -0.10242 | 0.99687      | 0.00506 | Timed out at 59.5 s |
| 26:56.8 | Data point 28     | 1.50000 mL | 0.11580 mL | 0.11588 mL | 0.50000 mL | 8.934  | -0.01413 | 0.48746      | 0.00100 | 28.0 s              |
| 28:00.6 | Data point 29     | 1.50000 mL | 0.11580 mL | 0.11611 mL | 0.50000 mL | 9.408  | -0.01497 | 0.88842      | 0.00078 | 15.5 s              |
| 28:46.6 | Data point 30     | 1.50000 mL | 0.11580 mL | 0.11642 mL | 0.50000 mL | 9.903  | -0.01712 | 0.83019      | 0.00093 | 12.5 s              |
| 29:29.6 | Data point 31     | 1.50000 mL | 0.11580 mL | 0.11679 mL | 0.50000 mL | 10.194 | -0.01474 | 0.64645      | 0.00091 | 10.0 s              |
| 31:27.3 | Data point 32     | 1.50000 mL | 0.17935 mL | 0.11679 mL | 1.50000 mL | 1.957  | -0.01138 | 0.54149      | 0.00076 | 10.0 s              |
| 32:18.7 | Data point 33     | 1.50000 mL | 0.17935 mL | 0.13991 mL | 1.50000 mL | 2.162  | -0.00826 | 0.34190      | 0.00070 | 10.0 s              |
| 32:54.3 | Data point 34     | 1.50000 mL | 0.17935 mL | 0.15299 mL | 1.50000 mL | 2.329  | 0.00841  | 0.21086      | 0.00090 | 19.5 s              |
| 33:54.9 | Data point 35     | 1.50000 mL | 0.17935 mL | 0.16268 mL | 1.50000 mL | 2.533  | -0.01444 | 0.56679      | 0.00095 | 19.0 s              |
| 34:39.5 | Data point 36     | 1.50000 mL | 0.17935 mL | 0.16825 mL | 1.50000 mL | 2.729  | -0.01081 | 0.59250      | 0.00069 | 10.5 s              |
| 35:15.5 | Data point 37     | 1.50000 mL | 0.17935 mL | 0.17190 mL | 1.50000 mL | 2.879  | 0.00523  | 0.07679      | 0.00093 | 10.0 s              |
| 36:01.3 | Data point 38     | 1.50000 mL | 0.17935 mL | 0.17444 mL | 1.50000 mL | 3.074  | -0.01576 | 0.64444      | 0.00097 | 11.0 s              |
| 36:37.8 | Data point 39     | 1.50000 mL | 0.17935 mL | 0.17634 mL | 1.50000 mL | 3.290  | -0.01372 | 0.74324      | 0.00079 | 10.5 s              |



## Assay Events

Sample name: **M02\_octanol** Experiment start time: **12/14/2017 9:40:49 PM**  
Assay name: **pH-metric high logP** Analyst: **Dorothy Levorse**  
Assay ID: **17L-14020** Instrument ID: **T311053**  
Filename: **G:\OpenLab\_PFA\_Sirius-T3-1\Sirius-T3-1\Data2017\17L-14020\_M02\_octanol\_pH-metric high logP.t3r**

## Events (continued)

| Time    | Event         | Water      | Acid       | Base       | Octanol    | pH     | dpH/dt   | pH R-squared | pH SD   | dpH/dt time            |
|---------|---------------|------------|------------|------------|------------|--------|----------|--------------|---------|------------------------|
| 37:13.7 | Data point 40 | 1.50000 mL | 0.17935 mL | 0.17782 mL | 1.50000 mL | 3.534  | -0.00886 | 0.57323      | 0.00058 | 10.0 s                 |
| 37:59.4 | Data point 41 | 1.50000 mL | 0.17935 mL | 0.17876 mL | 1.50000 mL | 3.765  | -0.00909 | 0.36165      | 0.00075 | 10.0 s                 |
| 38:34.8 | Data point 42 | 1.50000 mL | 0.17935 mL | 0.17947 mL | 1.50000 mL | 4.071  | -0.00570 | 0.25273      | 0.00056 | 10.0 s                 |
| 39:10.1 | Data point 43 | 1.50000 mL | 0.17935 mL | 0.18024 mL | 1.50000 mL | 4.684  | -0.00391 | 0.12958      | 0.00054 | 10.5 s                 |
| 39:46.0 | Data point 44 | 1.50000 mL | 0.17935 mL | 0.18083 mL | 1.50000 mL | 8.163  | -0.13728 | 0.99581      | 0.00680 | Timed out at<br>59.5 s |
| 41:21.6 | Data point 45 | 1.50000 mL | 0.17935 mL | 0.18119 mL | 1.50000 mL | 9.052  | -0.01846 | 0.83706      | 0.00100 | 23.0 s                 |
| 42:20.2 | Data point 46 | 1.50000 mL | 0.17935 mL | 0.18140 mL | 1.50000 mL | 9.247  | -0.00723 | 0.15620      | 0.00090 | 19.0 s                 |
| 43:14.9 | Data point 47 | 1.50000 mL | 0.17935 mL | 0.18156 mL | 1.50000 mL | 9.446  | -0.00873 | 0.24834      | 0.00086 | 12.0 s                 |
| 43:57.4 | Data point 48 | 1.50000 mL | 0.17935 mL | 0.18173 mL | 1.50000 mL | 9.647  | -0.00896 | 0.20472      | 0.00098 | 11.0 s                 |
| 44:44.1 | Data point 49 | 1.50000 mL | 0.17935 mL | 0.18194 mL | 1.50000 mL | 9.822  | 0.00182  | 0.01449      | 0.00075 | 10.0 s                 |
| 45:24.5 | Data point 50 | 1.50000 mL | 0.17935 mL | 0.18220 mL | 1.50000 mL | 10.033 | 0.01248  | 0.45958      | 0.00091 | 15.0 s                 |
| 45:48.4 | Assay volumes | 1.50000 mL | 0.17935 mL | 0.18220 mL | 1.50000 mL |        |          |              |         |                        |



Sample name: **M02\_octanol** Experiment start time: **12/14/2017 9:40:49 PM**  
Assay name: **pH-metric high logP** Analyst: **Dorothy Levorse**  
Assay ID: **17L-14020** Instrument ID: **T311053**  
Filename: **G:\OpenLab\_PFA\_Sirius-T3-1\Sirius-T3-1\Data2017\17L-14020\_M02\_octanol\_pH-metric high logP.t3r**

## Assay Settings

| Setting                             | Value              | Original Value | Date/Time changed | Imported from |
|-------------------------------------|--------------------|----------------|-------------------|---------------|
| <b>General Settings</b>             |                    |                |                   |               |
| Analyst name                        | Dorothy Levorse    |                |                   |               |
| <b>Standard Experiment Settings</b> |                    |                |                   |               |
| Number of titrations                | 3                  |                |                   |               |
| Minimum pH                          | 2.000              |                |                   |               |
| Maximum pH                          | 10.000             |                |                   |               |
| pH step between points of           | 0.200              |                |                   |               |
| Minimum titrant addition            | 0.00002 mL         |                |                   |               |
| Maximum titrant addition            | 0.10000 mL         |                |                   |               |
| Argon flow rate                     | 100%               |                |                   |               |
| Start titration using               | Cautious pH adjust |                |                   |               |
| <b>Advanced General Settings</b>    |                    |                |                   |               |
| Detect turbidity using              | None               |                |                   |               |
| Collect turbidity sensor data       | No                 |                |                   |               |
| Collect UV spectra                  | Yes                |                |                   |               |
| Stir after titrant addition for     | 5 seconds          |                |                   |               |
| For titrant addition, stir at       | 10%                |                |                   |               |
| <b>Titration Pre-Dose</b>           |                    |                |                   |               |
| Titration pre-dose                  | None               |                |                   |               |
| <b>Assay Medium</b>                 |                    |                |                   |               |
| ISA water volume                    | 1.50 mL            |                |                   |               |
| Water added                         | Automatic          |                |                   |               |
| After water addition, stir for      | 5 seconds          |                |                   |               |
| At a speed of                       | 10%                |                |                   |               |
| Partition solvent type              | Octanol            |                |                   |               |
| Partition volume                    | 0.150 mL           |                |                   |               |
| Partition solvent added             | Automatic          |                |                   |               |
| After partition addition, stir for  | 1 seconds          |                |                   |               |
| <b>Sample Sonication</b>            |                    |                |                   |               |
| Sonicate                            | No                 |                |                   |               |
| <b>Sample Dissolution</b>           |                    |                |                   |               |
| Perform a dissolution stage         | Yes                |                |                   |               |
| Adjust and hold pH for dissolution  | To start pH        |                |                   |               |
| Stir to dissolve for                | 120 seconds        |                |                   |               |
| For dissolution, stir at            | 10%                |                |                   |               |
| <b>Carbonate purge</b>              |                    |                |                   |               |
| Perform a carbonate purge           | No                 |                |                   |               |
| <b>Temperature Control</b>          |                    |                |                   |               |
| Wait for temperature                | Yes                |                |                   |               |
| Required start temperature          | 25.0°C             |                |                   |               |
| Acceptable deviation                | 0.5°C              |                |                   |               |
| Time to wait                        | 60 seconds         |                |                   |               |
| Stir speed of                       | 50%                |                |                   |               |
| <b>Titration 1</b>                  |                    |                |                   |               |
| Titrate from                        | Low to high pH     |                |                   |               |
| Adjust to start pH                  | Yes                |                |                   |               |
| After pH adjust stir for            | 30 seconds         |                |                   |               |
| Stir to allow partitioning for      | 15 seconds         |                |                   |               |
| Stirrer speed for partitioning      | 50%                |                |                   |               |
| <b>Titration 2</b>                  |                    |                |                   |               |
| Titrate from                        | Low to high pH     |                |                   |               |
| Add additional water                | 0.00 mL            |                |                   |               |
| Additional partition solvent volume | 0.350 mL           |                |                   |               |
| Additional partition solvent added  | Automatic          |                |                   |               |
| After pH adjust stir for            | 30 seconds         |                |                   |               |
| Stir to allow partitioning for      | 15 seconds         |                |                   |               |
| Stirrer speed for partitioning      | 55%                |                |                   |               |
| <b>Titration 3</b>                  |                    |                |                   |               |

Sample name: **M02\_octanol**  
 Assay name: **pH-metric high logP**  
 Assay ID: **17L-14020**  
 Filename: **G:\OpenLab\_PFA\_Sirius-T3-1\Sirius-T3-1\Data2017\17L-14020\_M02\_octanol\_pH-metric high logP.t3r**

Experiment start time: **12/14/2017 9:40:49 PM**  
 Analyst: **Dorothy Levorse**  
 Instrument ID: **T311053**

## Assay Settings (continued)

| Setting                             | Value          | Original Value | Date/Time changed | Imported from |
|-------------------------------------|----------------|----------------|-------------------|---------------|
| Titrate from                        | Low to high pH |                |                   |               |
| Add additional water                | 0.00 mL        |                |                   |               |
| Additional partition solvent volume | 1.000 mL       |                |                   |               |
| Additional partition solvent added  | Automatic      |                |                   |               |
| After pH adjust stir for            | 30 seconds     |                |                   |               |
| Stir to allow partitioning for      | 15 seconds     |                |                   |               |
| Stirrer speed for partitioning      | 60%            |                |                   |               |
| <b>Data Point Stability</b>         |                |                |                   |               |
| Stir during data point collection   | No             |                |                   |               |
| Delay before data point collection  | 0 seconds      |                |                   |               |
| Number of points to average         | 20 points      |                |                   |               |
| Time interval between points        | 0.50 seconds   |                |                   |               |
| Required maximum standard deviation | 0.00100 dpH/dt |                |                   |               |
| Stability timeout after             | 60 seconds     |                |                   |               |

## Calibration Settings

| Setting                   | Value  | Date/Time changed     | Imported from                                                 |
|---------------------------|--------|-----------------------|---------------------------------------------------------------|
| Four-Plus alpha           | 0.156  | 12/14/2017 9:40:49 PM | C:\Sirius_T3\17L-14015_Blank standardisation.t3r              |
| Four-Plus S               | 0.9945 | 12/14/2017 9:40:49 PM | C:\Sirius_T3\17L-14015_Blank standardisation.t3r              |
| Four-Plus jH              | 0.6    | 12/14/2017 9:40:49 PM | C:\Sirius_T3\17L-14015_Blank standardisation.t3r              |
| Four-Plus jOH             | -0.7   | 12/14/2017 9:40:49 PM | C:\Sirius_T3\17L-14015_Blank standardisation.t3r              |
| Base concentration factor | 1.010  | 12/14/2017 9:40:49 PM | C:\Sirius_T3\17L-11009_KHP_Base standardisation using KHP.t3r |
| Acid concentration factor | 1.002  | 12/14/2017 9:40:49 PM | C:\Sirius_T3\17L-14015_Blank standardisation.t3r              |

## Instrument Settings

| Setting              | Value                      | Batch Id    | Install date           |
|----------------------|----------------------------|-------------|------------------------|
| Instrument owner     | Merck                      |             |                        |
| Instrument ID        | T311053                    |             |                        |
| Instrument type      | T3 Simulator               |             |                        |
| Software version     | 1.1.3.0                    |             |                        |
| Dispenser module     |                            | T3DM1100253 | 3/31/2009 6:24:52 AM   |
| Dispenser 0          | Water                      |             | 3/31/2009 6:25:05 AM   |
| Syringe volume       | 2.5 mL                     |             |                        |
| Firmware version     | 1.2.1(r2)                  |             |                        |
| Titrant              | Water (0.15 M KCl)         | 10-10-2017  | 12/6/2017 10:48:42 AM  |
| Dispenser 2          | Acid                       |             | 3/31/2009 6:25:11 AM   |
| Syringe volume       | 0.5 mL                     |             |                        |
| Firmware version     | 1.2.1(r2)                  |             |                        |
| Titrant              | Acid (0.5 M HCl)           | 12-6-2017   | 12/6/2017 10:50:31 AM  |
| Dispenser 1          | Base                       |             | 3/31/2009 6:25:21 AM   |
| Syringe volume       | 0.5 mL                     |             |                        |
| Firmware version     | 1.2.1(r2)                  |             |                        |
| Titrant              | Base (0.5 M KOH)           | 09-22-17    | 11/27/2017 10:30:45 AM |
| Dispenser 5          | Cosolvent                  |             | 3/31/2009 6:26:24 AM   |
| Syringe volume       | 2.5 mL                     |             |                        |
| Firmware version     | 1.2.1(r2)                  |             |                        |
| Distribution valve 5 | Distribution Valve         |             | 3/31/2009 6:28:19 AM   |
| Firmware version     | 1.1.3                      |             |                        |
| Port A               | Methanol (80%, 0.15 M KCl) | 9-26-17     | 12/11/2017 11:29:08 AM |
| Port B               | Cyclohexane                |             | 10/19/2017 3:11:05 PM  |
| Port C               | MeCN (50%, 0.15 M KCl)     | 10-30-17    | 11/27/2017 10:21:50 AM |
| Dispenser 3          | Buffer                     |             | 8/3/2010 6:05:16 AM    |
| Syringe volume       | 0.5 mL                     |             |                        |
| Firmware version     | 1.2.1(r2)                  |             |                        |
| Titrant              | Dodecane                   |             | 12/6/2017 10:50:59 AM  |
| Dispenser 6          | Octanol                    |             | 10/22/2010 11:52:43 AM |



Sample name: **M02\_octanol**  
Assay name: **pH-metric high logP**  
Assay ID: **17L-14020**  
Filename: **G:\OpenLab\_PFA\_Sirius-T3-1\Sirius-T3-1\Data2017\17L-14020\_M02\_octanol\_pH-metric high logP.t3r**

Experiment start time: **12/14/2017 9:40:49 PM**  
Analyst: **Dorothy Levorse**  
Instrument ID: **T311053**

## Instrument Settings (continued)

| Setting                                   | Value                      | Batch Id    | Install date           |
|-------------------------------------------|----------------------------|-------------|------------------------|
| Syringe volume                            | 0.5 mL                     |             |                        |
| Firmware version                          | 1.2.1(r2)                  |             |                        |
| Titrant                                   | Octanol                    | 9-14-17     | 12/11/2017 11:32:26 AM |
| Titration                                 |                            | T3TM1100153 | 3/31/2009 6:24:17 AM   |
| Horizontal axis firmware version          | 1.17 AI1DI2DO2 Stepper 2   |             |                        |
| Vertical axis firmware version            | 1.17 AI1DI2DO2 Stepper 2   |             |                        |
| Chassis I/O firmware version              | 1.11 AI1DI0DO4 Norgren I/O |             |                        |
| Probe I/O firmware version                | 1.1.1                      |             |                        |
| Electrode                                 | T3 Electrode               | T3E0769     | 8/15/2017 10:21:54 AM  |
| E0 calibration                            | -5.35 mV                   |             | 12/14/2017 9:41:17 PM  |
| Filling solution                          | 3M KCl                     | KCL095      | 12/14/2017 3:53:24 PM  |
| Liquids                                   |                            |             |                        |
| Wash 1                                    | 50% IPA:50% Water          |             | 12/14/2017 3:56:50 PM  |
| Wash 2                                    | 0.5% Triton X-100 in H2O   |             | 12/14/2017 3:56:52 PM  |
| Buffer position 1                         | pH7 Wash                   |             | 12/14/2017 3:56:54 PM  |
| Buffer position 2                         | pH 7                       |             | 12/14/2017 3:56:57 PM  |
| Storage position                          |                            |             | 12/14/2017 3:57:36 PM  |
| Wash water                                | 6.6e+003 mL                | 12-11-2017  | 12/11/2017 3:16:20 PM  |
| Waste                                     | 3.5e+003 mL                |             | 12/11/2017 3:16:25 PM  |
| Temperature controller                    |                            |             | 8/5/2010 7:35:13 AM    |
| Turbidity detector                        |                            |             | 3/31/2009 6:24:45 AM   |
| Spectrometer                              |                            | 072390      | 11/23/2010 12:22:28 PM |
| Dip probe                                 |                            | 11086       |                        |
| Wavelength coefficient A0                 | 185.563                    |             |                        |
| Wavelength coefficient A1                 | 2.17439                    |             |                        |
| Wavelength coefficient A2                 | -0.000285622               |             |                        |
| Total lamp lit time                       | 644:54:39                  |             | 11/23/2010 12:22:28 PM |
| Calibrated on                             | 12/4/2017 11:26:25 AM      |             |                        |
| Integration time                          | 11                         |             |                        |
| Scans averaged                            | 10                         |             |                        |
| Autoloader                                |                            | T3AL1100237 | 11/10/2015 10:34:13 AM |
| Left-right axis firmware version          | 1.17 AI1DI2DO2 Stepper 2   |             |                        |
| Front-back axis firmware version          | 1.17 AI1DI2DO2 Stepper 2   |             |                        |
| Vertical axis firmware version            | 1.17 AI1DI2DO2 Stepper 2   |             |                        |
| Chassis I/O firmware version              | 1.11 AI1DI0DO4 Norgren I/O |             |                        |
| Configuration                             |                            |             |                        |
| Alternate titration position              | Titration position         |             |                        |
| Alternate reference position              | Reference position         |             |                        |
| Maximum standard vial volume              | 3.50 mL                    |             |                        |
| Maximum alternate vial volume             | 25.00 mL                   |             |                        |
| Automatic action idle period              | 5 minute(s)                |             |                        |
| Titration tube volume                     | 1.3 mL                     |             |                        |
| Syringe flush count                       | 3.50                       |             |                        |
| Flowing wash pump volume                  | 20.0 mL                    |             |                        |
| Flowing wash stir duration                | 5 s                        |             |                        |
| Flowing wash stir speed                   | 30%                        |             |                        |
| Solvent wash stir duration                | 5 s                        |             |                        |
| Solvent wash stir speed                   | 30%                        |             |                        |
| Surfactant wash stir duration             | 5 s                        |             |                        |
| Surfactant wash stir speed                | 30%                        |             |                        |
| E0 calibration minimum number of points   | 10                         |             |                        |
| E0 calibration maximum standard deviation | 0.01500                    |             |                        |
| E0 calibration timeout period             | 60 s                       |             |                        |
| E0 calibration stir duration              | 5 s                        |             |                        |
| E0 calibration preparation stir speed     | 30%                        |             |                        |
| E0 calibration buffer wash stir duration  | 5 s                        |             |                        |
| E0 calibration buffer wash stir speed     | 30%                        |             |                        |
| E0 calibration reading stir speed         | 0%                         |             |                        |

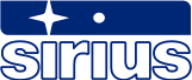

## Assay Settings

Sample name: **M02\_octanol** Experiment start time: **12/14/2017 9:40:49 PM**  
Assay name: **pH-metric high logP** Analyst: **Dorothy Levorse**  
Assay ID: **17L-14020** Instrument ID: **T311053**  
Filename: **G:\OpenLab\_PFA\_Sirius-T3-1\Sirius-T3-1\Data2017\17L-14020\_M02\_octanol\_pH-metric high logP.t3r**

### Instrument Settings (continued)

| Setting                                     | Value   | Batch Id | Install date |
|---------------------------------------------|---------|----------|--------------|
| Spectrometer calibration stir duration      | 5 s     |          |              |
| Spectrometer calibration stir speed         | 30%     |          |              |
| Spectrometer calibration wash pump volume   | 20.0 mL |          |              |
| Spectrometer calibration wash stir duration | 5 s     |          |              |
| Spectrometer calibration wash stir speed    | 30%     |          |              |
| Overhead dispense height                    | 10000   |          |              |

### Refinement Settings

| Setting                        | Value    | Default value |
|--------------------------------|----------|---------------|
| Turbidity detection method     | None     | None          |
| Turbidity wavelength to assess | 500.0 nm | 500.0 nm      |
| Turbidity maximum absorbance   | 0.100    | 0.100         |
| Turbidity probe threshold      | 50.00    | 50.00         |
